# Supplementary material for: Assembly of Schizosaccharomyces cryophilus chromosomes and their comparative genomic analyses revealed principles of genome evolution of the haploid fission yeasts
Source: PubMed Central journal article supplement (PMC6168568; doi:10.1038/s41598-018-32525-9), 2018-10-02
Supplement: 41598_2018_32525_MOESM2_ESM.pdf [file 41598_2018_32525_MOESM2_ESM.pdf]

## Supplementary information

### **Assembly of *Schizosaccharomyces cryophilus* chromosomes and their comparative genomic analyses revealed principles of genome evolution of the haploid fission yeasts**

Lajos Ács-Szabó, László Attila Papp, Zsuzsa Antunovics, Matthias Sipiczki and Ida Miklós  
Department of Genetics and Applied Microbiology, Faculty of Science and Technology,  
University of Debrecen, Hungary

**Correspondence:** Ida Miklós, Department of Genetics and Applied Microbiology, Faculty of  
Science and Technology, University of Debrecen, 4032 Debrecen, Egyetem tér 1., Hungary

E-mail: [miklos.ida@science.unideb.hu](mailto:miklos.ida@science.unideb.hu)

Tel: +36-52-518-600/62056







tagcgtgagttattgagtgctttttggtggcttctgcgcatttctggttctttactacactactgggtaggttttgaattcgtttgaccgtttca  
atttgtatcataaaaaagaatgaaaaagaaaagactgggtgagcggccgaatcttcttctatgttctcctgccagttcagatagctgtttg  
ccgcgatagcgaatctttagtgcgatctggacaactggaaaaaggttgctaaaaatctgctcaatttctgctcccatattctgaaaaga  
agaatcaagaagcgtccatgaatgcttgaattctatatgtcagtaactgattggtaactgtccaacacagattgctaggattccgcaagctac  
tgtcaagttataaatgaaactgctgcactgtccgggtccacgttttgcactgtgtctggattttttatgtgcttactagaactttagatt  
attgccctttcattaacacagctttaacaatcttaattgattgtctcagaatcctgctactgtcggtttttggcgtacacgcttcctccatttg  
agtgtttagtaaatggacgtgggtataaaaagcacagccatgtgtattaaagttaacaaaagggtgaaaagtagggaggaggcctacagca  
ccccgattcccatgtgtctcaaccatagtagtactaacgaggcctcagacgcttaactgagtgatcggacgggaactgggttttcgcttaggta  
tggccgtagacattatattgagactgttttagtagctgtttgaacattcaggtttccaccttactgttttagttaccttacaattgtagatg  
atgctaccctagcaaaagaactaacaatgaattgaacctggtagcagtggttttgaacacgaggtaatgaaatagaaaaaggcaccaaag  
gaaagcctatttgggtcactcaaaaaactctagccattgccattgcggttatttttctgttttagagctgtgaaaggattttattttatcc  
tatagggggatcaaaagaagggtctttacttggattttcttgcgcttttgcttttctatcaatattcgatagttttcacggctgatctctgatt  
ttttagaaaagcaattgatgttgttcttttctttaaaggatgaatgaaaagctgctaggacttgccaaagcagccgaatcttctgtggg  
gtttctcccgcgagttctgacagcagattactgtcttacagtgaagtccagatattccattagggatgacttggagaaggggtttatgtttaccca  
agcctcgggtccaccatgttctgaaaaccagaaagacgagttctcaaaggatgttctacaacaattttgggtgctttgggtcttctgcaatggagc  
tgactaagttcttctatttttagttcagcggcattcgcgaggattccaccactgcgaaaaaaannnnnnnnnnnnnnnnnnnnnnnnnnnn  
nnnnnnnnnnnnnnnnnnnnnnnnnnnnnnnnnnnnnnnnnnnnnnnnnnnnnnnnnnnnnnnnnnnnnnnnnnnnnnnnnnnnnnnnca  
cctcaaaaaactctagccattgccattcgggtgattttctgttttagagctgtgaaaggattttattttcctataggggatcaaaa  
gaagggtctttacttggattttcttgcgcttttggtctttctatcaatattcgatagttttcacggctgatctctgattttgtagaagcaattg  
atggttgtttgtcttttctttaaaggatgaatgaaaagctgctaggacttgcxaaagcagccgaatcttctgtggggttctcccgcgagttct  
gacagcagattactgtcttacagtgaagtccagatattccattagggatgacttggagaaggggtttttagttacatccaagcctcgggtccacat  
gttctgaaaaccagaaagacgagttctcaaaggatgttctacaacaattttgggttgccttgggtcttctgcaatggagctaaactaagttctt  
gctatttttagttcagcggcattcgcgaggattccaccactgcgaaaaaaaagtagaatgaaggacttctcattaatcagttatttgcatttt  
catattacgttcttcttttttaggggataatattgttaaagggtgacttcaaaaaatgttcaaaacagcgtagcagctattctttcattggcgtt  
ttaaattcttttaactctgtttcgggtactgcatgaaaataatattctgaaagctatgctaatgaaaaatgaaatagtttttaggtctgttga  
tttctcgttcgattcacctccctgtttttctcagcgtcctataggagggggttctgatgttctaaaacgcttttgcgtgggttctgaagggtt  
gattggatttcaagctattgcctatgtttaatattgaaggagccgtgctggcgagcgaataactttcaattcatgcaatacctttatttctt  
tgagtgagcaataattttagtagtcttagaaaagagccatgtactgaatgtttgaacgggtatcctaagacgaacaagaagatcaacctaagaa  
tactgaaagcgtaaagttagatgacagctgatcacttctacctcctttttgattaaacttttttatttttacttttttttggtagattttata  
gacaacgatcaattgtttggcacttaaaatatacattatgcgtttatgattcattaatgtatattcatatcaaatcctctataatgtaacgta  
ataatattcatgcgtgcttgcctatagttaccagctaacactactttgactgtctcaccatttagaatctcctttatacaataaactcaat  
acattgacagtcgccagaagctgaaatgacctgtccagtaatccatcggtgttatcatcgacaaggaaaccaacaacttctgctattttctgtg  
gtttgcatagcgtttcataaggcgaagttagcgagaaatgagtggtactccttcaaagtcatttagcatatcgttttcaactattccgggg  
ttaattgattaacggtatggccttggaggcctaattcggcagcccaacatcctaaagccttgcgatagtagatttgggtgcagaatagatgggat  
actgaggggacaccatcttccagccagcttccgacattataattctgctcgggtccagcatttcttcttcttggagagtaggaaatact  
gcttctgtaaggaaaaatagaccacgaacgttcagatcaaaagaataataaagctcctcgatattgttttccaaggggtttggcttagttacac  
gcccagcattgtgataaggatgaatcgtagggtccgaatgccttatagtgggtgcaacaataaatttaggactgccaacatggcttaaatctg  
cttgaatcttaattgcatctgccgaagtccaagcctttaatttcttaaccaatgttctgtcgttcaacactactatctgaagtaaagctaaagg  
ctacttggcgctcgaagagctagcgttcagctatagctgctcaattccttgaagctcgggtgacgattgctacttgttttgaaggggcaaa  
ttggttctgtcatgttcacaagttcgtaataactaaaggagttttgctcaagtatttatggatgctattcaagttggcttctcatcata  
aattcaagttactaatcaattccttacttgcataagtttttctttttctttggtgaaagtaacaaggtaacgaatgactnnnnnnnnnnn  
nnnnnnnnnnnnnnnnnnnnnnnnnnnnnnnnnnnnnnnnnnnnnnnnnnnnnnnnnnnnnnnnnnnnnnnnnnnnnnnnnnnnnnnn  
nnnnnnnnnnnaaaaatagaccgaacgttcagatcaaaaagataataaagcttctgattattgttttgcctcaagggtttgcttagttcac  
gccagcattgttgataagaatgaatcgtagggtccgaatgccttatagtgggtgcaacaataaatttaggactgccaacattgcttaaactg  
cttgaatcttaattgcatctgccgaagtctaaagcctttaatttcttaaccaactgctctgtcgttcaacactactatctgaagtaaagctaaagg  
gctacttggcgctcgaagagctagcgttcagctatagctgctcaattccttgaagctcgggtgacgattgctacttgttttgaaggggcaa  
attggttctgtcatgttcacaagttcgtaatttactaaaaggaggtttgctcaagtatttatggatgctattcaagttggcttctgtcatcata  
aattcaagttactaatcaattccttacttgcataagtttttcttttttctttgggtgaaagtaacaaggtaacgaatgactaaaaataaattt

cttccttagcgacgtaattttaagttatgtggatgactaatattaataaaattagccgatttggcactgtatgaatactctgatcagaatagcttc  
catatcttagtcggtcttgcgaaagggtaaatgtaattctcaaggaattgcaagattgttagactgctgaatcagaagacagttggttgagcttgc  
attacaaagttaacacagtcacaacatcagaactgattcatcatgactaaaattgtaataaagaaaaaaatgttctcaaaacaatattcacaat  
gcgtggaagcagactgtttctgcaatgattacaacacctgcaaacctgttcacacagatccaatgattgggggtgaatgcttttttaactcttt  
attactctcaaaagaaaaaaaagatgcactctaaaaaatagcttgaacgggtggcatgacgttctctctgacataatctgtcatcattaaggat  
tcattgtaaacatttaatttcacaacatcgatgttttaattctcttcttcttcttcttgcgaaataaatgcctcgattatgaatattgagttgagaag  
aaaccaaccataaattacagttaccaagtttcgtaattttattagatccttcaaaataaaaaacacgtacaggataaattaatgagaggaattcc  
gatagtaaatcttctgtaaaatgactttatggctcggtcacgaactccatggagatatacattagaacttagagctataactgggtgaataaaattag  
tcgaccacgtaaatctaaaaaaaatgatctttttagtcaggaccatacgtacattcattactccttgcataacagattttttcaataccctttg  
acaactaagaaatctaaaatacgaaggaatcgaagacttgattatttctcaagattttattatgacaaaaagacctttggcttcttaatt  
gtaactcagaatcgacttctatacaatctgcctctgtaaaagagaaactttcatctatcataaggatttgagtcgaatgcttttactaatttcttt  
tagtaaaattaaatgtcataatcatataaaaaataatcataattttctagaacgcgtaattaatgagaacgataattgctgcgcaagaa  
attcttatgattatttctcattaaatttcccaatcaattaatacatagccaatccaccagaagccgaaatcacctgtccagtgatccaccgacttc  
tatcttcagcaagaaaagcgacgatttcagcaatgtcagaaggtaatccaatgcgatttcaaatggagtcggttttttgcgaaactgaattttc  
atccgaaagtaccccttcaacatctcggtatcaacagctcctggattgattgatttacggtatggctatgagggcctaattcggtgcccacat  
ctagtaaaacctgattgctgcttcttgcacaataaacaggttctggaagaaatccaacttccagcaacacttcaaaaattatgatccttc  
ctccatttcttttcttttgggaaggtgaggcactatcgcttctgtcataaaaaagacaccacgaacatttcatcaaacatactgttataatctt  
ccatagttattgttctataggttttaattggacctgctacctgcattgttaacaaggataggtatgctggaaccaaagcttgaactgtggcatc  
aacaatattgttagcacttgaacatcacgcaaatctgcctgaattttgatcgatctgctgagggtccaaaacctttatttttcccaactgttc  
agtcgatcaatgctactgttgaggtaaaaggtgatggctactttagcaccgcccgtgcaaaattttagctattgctgctcaattctctgtaa  
gctcctgtaacaggtgctacttgttttggaggggcaagctatttctgacatctaaatgggaaaaatggtttaagctctgaaaggcttccattctgt  
cttatatagacaaagatttgaatatcatcgatttagtcatcataatttttctgtaataatcattccatgggttagtctctatctgtattttcttagtaa  
caagtaaaattatgctacttattgttgcggtgtaagtcaatgtgtcagtttaataattctcacggcttatgaaaaatcaagcggaaattaataa  
ctacaattgtagatttctatacgttaattggacttagttatactgctatctagatggtagtaattccagggatctggttaactaaattgaaagtag  
gaagcagatctatttagccagaccagtcgaatcttcaatctgaagaattcactgtggattcatagttatatactctgctgaaacaactaacg  
taactatctcttctgataccaacttcttctgctataagacttccgttccgaaaggcttccgatttgtgaaatcatattttcttgttttaccatt  
tgaatgtttcatcctttagtcttattgcatttgcataatatttagcaatatgctcttatgatagtgatttgaatatataataaacaagacaccta  
tcgtgacagacagacatgacaggcacttacgaaagaatattaccaatcatcattactaatcaaggcaactgataacaattgatgtttggatat  
aaagggacgaatccttctagttgagagtactactacccttagaaaaatgacagaatacaatcttcttcaaaaacaagtagcaatcgttaca  
ggagcttcacgaggaattggagcagcaatagctgaaaattggcagcccgggtgctaaagtagccatcacctttacctccaacagtagcattga  
tgcgactgaacagttggtgaaaaaaataaagggtttggcacctcagcagatcgatcaaaattcaggcggacttgcgtgatgttcaagtgtta  
aacagttgttgatgccacacgtaaagccttgggtccacgatccatatactgtcaacaatgcaggatacttagacgaaccaaactttaggaa  
cgacaacaatggaacaataaacaatattttagattgaatgtccgtgacgttcttctgacagaaagcctgctgctcttctccaaaagtg  
ggtagaatcattaatattggaagtattgctggaagaaaagcatttctcagtttccctatattgtggaagcaaggctgctgttgaaggcttaca  
agatgttgggtgctgagttaggccctcaaggccatacggtaaatcaagtcaatccaggacctgttgagacggatagataagggcaatgcctac  
cgaattacgcagcttcaaaaagcactcctttgaaaaatcgcttggacagcctcaagaatagcagcgatagttgggttcttctgctgagg  
atagtggtcggtgattactgggcaagtattcagcttctggtggaatggaatgtattaattagatataagcaagaaaggaaaaataaa  
aatcataaacaacaattcagtttcttcttttataatattactatcattccatgatcatttgcagctggaaacgacttatcttataactgctt  
ccttatatttttaggtaaaaaccatttaattggaagtcatctctggaagcttatgctacaatggggcacaatggctgttaatacctaaaaac  
aggaaacttgcgcaatatttagtataattctgcaagtggtaatttcttataaagtaagactcgttggttataaatagagaacaaaatcgt  
agctcttacaagtttaattggtttaaagagaataaaagcttctgtaaggtgatcgtgactagtcaggcaaaaacttgggttgggaagattcgtttc  
aaagtgtacaatgtacaacttgaagcttggagaataaagatcaaaaaataaataatgaaaaggttagtaagcgttagtagactaattatt  
acattaatgaaatctcatgtaataagaaaattaaacaaaaaatgcttactgtatttacttaattagtaagtaactgtacatgtatttgaaga  
ttcctgcatagataatgtttcattttaaagtaggacttcaaaatgaattcaaccgaaagtctcaaatagattacatattttaaattgttcatag  
tatcaaggagatgtatatcagatttgatattaattgaactaagagtaacaaaaaattggatagaggagtcgaagactgataagatgcaat  
tagttgaatgaaagaattcagtaaaaggacttttaataactattctataatagaatataattgagatgcttaccggggagaaatgtctcgttcaa  
gtgaaaaacttctcaacaatcctcaatcaatttaagctaaaatattttaaagtagttactaaattcgtttcacattaatagaagttccg  
ttatcgttctgtgacagtatttttccagcagcagattccttattatgctataaaaaatagaaactacatttttccacatagaatttga

ttagactttcttacctgtgtacatataagctcaagatccatcatatacttgatccctttttacacatcagttaataaccctattaaattaaaacatt  
aagcttcaatttttaaagctacattatctatttctaaacatgataaactttatcttctaaatcgattttcctttacattatgctattattcatttgc  
ttacctttaagagccaaaatgtgtaagaagaaatagccaagcgacttttaatttgattatcttgaagtaagtaaaaaaggtgtctaaaatt  
tacagtatagaatactacgtattttaaagtagtgaagaaaggtggatgactattaattgtttattgagggttaaacaacgtagataatgaaa  
ctagttgcataccttctgactccaaatctgaccattctaaaggaaccgaattccagctgaaaccagattcttcaattttacttattacgattgg  
aattttggatgtgtttaaacaagtaaatgctttcgactttacctttagttcttgaacttcgacttttagtggaaactgagaatattacattcaaan  
nnnnnnnnnnnnnnnnnnnnnnnnnnnnnnnnnnnnnnnnnnnnnnnnnnnnnnnnnnnnnnnnnnnnnnnnnnnnnnnnnnnnnnnnnn  
nnnnnnnnnnnnnnnnnnnnnnnnnnnnnnnnnnnnnnnnnnnnnnnnnnnnnnnnnnnnnnnnnnnnnnnnnnnnnnnnnnnnnnnnnn  
nnnnnnnnnnnnnnnnnnnnnnnnnnnnnnnnnnnnnnnnnnnnnnnnnnnnnnnnnnnnnnnnnnnnnnnnnnnnnnnnnnnnnnnnnn  
atgctattattcatttgccttaacgcttttaaagagccaaaatgtgtaagaagaaatagccaagcgacttttaatttgattatcttgaagtaagtaaat  
taaaaggtgtctaaaattacagtatagaatactacgtattttaaagtagtgaagaaaggtggatgactattaattgtttattgagggttaaaca  
aacgtagataatgaaactagttgcataccttctgactccaaatctgaccattctaaaggaaccgaattccagctgaaaccagattcttcaa  
tttacttattacgattggaatggatgtgtttaaacaagtaaatgctttcgactttacctttagttcttgaacttcgacttttagtggaaactgaga  
atattacattcaaaaaggaaacaaaagcttcgctgaataaactcataggagaaaaatccgataaaaagtgatccgatgcttttatactc  
cctgatcaatatatggaagtaacagatctttccggaaaattcaattggttaacagtaacaatacgttgtaacagcagctttagctttcgtat  
gtgtgtgtaacattgtaccatttctataatttatttctatcagtttagcaaatggggaacagtgcttttaatttagtaaacactattgattggaatc  
ttcttatgtaagtagattaaaaatattatcagaaaaatgttagtagtagcatttctagtaagaactgcatttatgtggtttcacttgatagaat  
gagttgctgcgannnnnnnnnnnnnnnnnnnnnnnnnnnnnnnnnnnnnnnnnnnnnnnnnnnnnnnnnnnnnnnnnnnnnnnnnnnnnn  
nnnnnnnnnnnnnnnnnnnnnnnnnnnnnnnnnnnnnnnnnnnnnnnnnnnnnnnnnnnnnnnnnnnnnnnnnnnnnnnnnnnnnnnnnn  
nnnnnnnnnnnnnnnnnnnnnnnnnnnnnnnnnnnnnnnnnnnnnnnnnnnnnnnnnnnnnnnnnnnnnnnnnnnnnnnnnnnnnnnnnn  
gtgttaacaagtaaatgctttcgactttacctttagttcttgaacttcgacttttagtggaaactgagaatattacattcaaaaaggaaacaaa  
agcttcgctgaataaactcataggagaaaaatccgataaaaagtgatccgatgcttttatactccctgatcaatatatggaagtaacag  
atcttctttccgaaaattcaattggttaacagtaacaatacgttgtaacagcagcttttagctttcgatgtgtgtgtaacattgtaccatttctata  
atattatctatcagtttagcaaatggggaacagtgctttcttaatttagtaaacactattgattggaatcttcttatgtaagtagattaaaaatatt  
tatcagaaaatgttagtagtagcatttctagtaagaactgcatttatgtggtttcacttgatagaatgagttgctgcgagagtagtatttctcat  
taagcttgcgagagattactagtggtatggtttgcttttgaactattattagtagtatttcttggatataaattaaatgtctaacgtgaaac  
acaacatgccccatgtttgagaatacaaaaaggattatgtaccattaccctgcgaacgactacgagtaataattggggcttcagagcaa  
tctactagctcaactcgtgaagtcgagaatataccgatatcattggctcagacaaaatgcaaatattggcattcaaaagcagtagtcaaaa  
caacaatacttctacggatgtaattctcaatactcataatcatagatcctaagggatccagaaaactgataagctaatcataagcactcatta  
aacgacaacatcgaggactttctttcaatttaataagtttcattagggtaaatcttattccataaccgtttaataagaagtgactgatctttg  
ttaacagatcgatattcaactgatcaattgaggtattttcagtaggttctctccattaaaaatggtacgacgtcgataggaaccctaacg  
gatcttctgtaacgtttgctattctgtcaattctgctccatccgatccatttcgctccattcgatccattctggtttccattcgacctattctgta  
aatagctctgaaaatccatttctcattcaccacatctgaaacctctggaggtgatcctcaagagtacgctctcttctgtctgaattggggaagc  
tacattcagaatctgttctttggagacgaacattaacctcatttcaatatttctccctcattctcaatattcctccctggcagcaattcaaaag  
tcttttaaaaacctcataacatcctcagatgttcagctggtggcgaggaaatgaattcattcaaaaactcctgcattcatctaaattagta  
tccactatttgcactatgtagaaaaaggttggtaaaaactgtgaagcttaggataaacagaaatgttagtgcggatgaaaataaataagtagatg  
tctgcgcttctatctgcagagcaatccttaaaaaattacaaccatttggtaatgattatactatggagtagattgactactgtcagggagaa  
atctcacagttatgagaatgtaaatcgagtggaaagtaataagtaacaattcaaaaattgtctattggaattggaactgttagtactacgtagagta  
atagtaatatgtccaggatctgattaactaaatgaaaacgactgtgtcaatcttattagcctgatcagtaaatctccgatctaaagatttca  
ctgtcgacacacatatatatttctgtatattgcatgtgactggcttctcaattaatagcaataatcacgaattgtaatttaacgaggt  
ttctgattcaaaagagaaattgcatttcaattttggttacttattatcaagcacattcttaagcttataaactgattagctaatatt  
ccattctataacggatgttatattatgaatgtaacgagggaccaattatgacattagtagcaatgtaataaacaacaaactgagaaaaca  
gacggaaagtgaaccaatcatcaaaagattagtaaaccttattggttttacttactagtttttagattactatataaacgcggttctcctcagcca  
aaatctcagtaggaggattttgctggcagagctaataaactgttcgataacatattcattagtagtaccagagacgttactaaagatataatca  
ctccagatatttagtaacttttagagtaaatcaactgacatttaaagcaattacaattgattccactcacattctataactatacggagatt  
ttccgtgacagccgagtattaaacaatgccataagactaaaaggatgcgaaaatacaaatagtaaacaaaagaaaaggtagcttttagggg  
ttaaggcacctaataaagaagtaagctattgaataaagatctttggctacaaaagggttaataagtaattgcaattaaatcttacaataa  
gtatgatagggcgaagatacaaaaattgcaatattactctatatatagtaagtaacactatacacgttttgagaattcctgcagctataat  
taggttgaattcaaaaatgtgctaaaagcattccttatgtatgctgatttaaaatcctttagtagctttctgttttagaattattgcaccattcca  
taactaatcagcttctttagcattactgatcaagcctgaattacagaaaaaaagttcaatgtaattggaattatcattatcacctatttctt

attaaaataaaaccattagatgagaatattctggtatataagtaaagcttttagggtaaagcggcattcagaagattgaaagagtcagttggttgt  
aatcgagtaattcttctgaattttttatgtgtaattatcacaactctggctaaggtattctattttctaagtagtagtacgcgaggtaaataataa  
gtaagtacagaatgatttgataccactcagctcattctctaattaagaatgttactatttctcgggaatataatgaaaggagctaaaacgggactt  
gtctcgggaagagtttagcaggattaaacctcaagccctcaaataggcgaactgaaaaatacgaagtggaagtagtcacgaatgaactgact  
ttattataatttagcttactaaaataggatcataattatctcctcaggcaattatcgccactttgggtgaaagtcttaaccatttataaaggacttagg  
tagagtacttttaggactaataaagcgcaatgtcggctgttcagattggctgggacgggtatttagtattactgacgaacgacaccaggctcca  
gtgaatgaatatcattgaaagaaatgaatgattcgcaaaagcagtatattcgttctctatccctattcttgaatcatctggggtaaataaacc  
aggcttttatcaaagaatgttgagaattatcccagggtgcgtccatactttaaaagctcatcagatatcttctcaaccacgaattttagct  
ttccctgttaaattatgctcgaatattgatgacttactcactttcagagttcattgatcagatcattgtcaagcacattggtttacagatcaaa  
gcagagcattatcccattgttgacaatgtttactagctacaatcggggaaatgcttgagaggatgtcgtactctgaattttagaagcttggg  
ctatagcatatggaaacttagcaaaaattctgattgacgctgaaaagaacattaccagagccaacctggaatggcttcgctgagttgaaagtc  
gtagatcttattgacgaatcttcgatgtaaaatctgtttatagttccaagagataaaacgttcaaaattgcttctgcttaccaggacagtat  
tagtatctcatggaagataccagggttccgcatgaaacaattagagaatattctttatcaaaaacctgatcaaaaaaaatcagtagcggga  
tatctgtacgtcgcgtccatgagggaattgtcttaattatgtcatgagcatttgaaagtaggtgatcgttggagttagtctccagccggtgaa  
ttcacatacaaaacgggtgaaagaaagagaaagcctccagtgctctgttttctgggtggcatcgggaataacacctattgtctatcgttga  
gctttgttgatggaagaacagttgtgtttgctattctaataaggaaatattcctctcgccttttaaaaattggctctacaactcaaggatca  
aaagaagattcaagttgaaagaatttttcaaaagaagcttatctccgaaagaggagattatagacgagtaatgacacgtgtttacttctg  
gaagacattatgaagctgaattctgtcgaatgacacatatatgcttggaccgaatagttacatgacgattgttaaggaagaactagtaaagctg  
gggtgtagaacgaaaagaatgcaactgagtttttggccatactctccttgattggctgacatacgcgtccttttggcaacctaaagttaattc  
catggcagatagacctcaaccgagagatttagaaaattgatgaactcctgttatagttcctaacgaattagtaattacaagaacaaaaagc  
aggaaacatctagctaattgtattatagaagaaaaattatcagaaatttaaaatgttgaggacctttatgctgacatccaattatagcatag  
gacaacatgtgattgcttaataactttacaggataaaaaaccttctgaacatatgaaagaatttatctgaaaggctatcatctcaacatc  
aattatgttgggttactttctgtcgggaatattcaatgaccaactctaattcgggaaggaagaaaaatcaatagtgaaatgattgtaatttag  
ctttgtccttggctccactgtttctatttttagcatgtatctaacaacctaattggctcattgtcattatattactttcacatctgtgtacagactaa  
atagctttggcatttgggtaataactgaaatggatgactaattaaggatcattataccgaaggaatcaggaagataattattgttggatttt  
tatcatgaaagctataatagggtatctgttctacttcaatcatttactatcagataagtcaaaaggacaggattgattatcgcttaaat  
atthaataacttatagagaagaaagccgaaatctgatggattgggagaatgacacctggtaactaacaattttaaaatacttctggacctgat  
acgctttgaatgttctgcttaaacagatcatttacgcatatttataaatgacgtatttttagatttaaccagattcaaatcgcctgcttgaacc  
ttttgcaatcattgtcctaaaattttggattaaagtatccctaaacaaaaatgacgtgccaatccgcttctgctgacttaccttagacttgg  
tatataccatttaaggagaggtctagcttattttccgttacttcccattcaccatacaatttaaatcaaccttacaataattcacttg  
actatctttggaagaagattatgttggactcgtagattgagagatgtataatgaatacagatgacagtaatatagtttggggaggcttgc  
atgttagcactcacacttataatgacttattgagatagccacgtctggattaaacgtaacctaatatcaagcattcaaaagagaggctg  
attattcagtttctgttctcaagattaacctcaagattaaacaaaaacttgaacttcatagttcaatatccaggatatttaaaactttaattg  
atatattttttatgttaaaaaaaaagcagtgactgagcaaatatataagcattgttgggctgcttctgactttataaagttcacagatct  
caggatattggttacacttgaggcttataaacatagcagtttataacattaaaaaataagaaaatacattctctctgaaatcttcac  
atttttctcaatgtgccgtcatgaggtgtgagtagttgctgatatttttcaaaaatggacttcaaatgctgaaacaattaaaccggggct  
actcaatattgagttaaacctgtcattctgttactgaaagaacagaaaacaccattaactcatcattattttgagagaaaaccaatatt  
atgctacaataataatagtcgtaatttaagcggttgaatgttattgcttccatggttatttcatggtcacttacgaaagctccttctgttca  
gaaaattccagttagattttcatagcaattggatgctttgtttcattaactttatgtttccctaactcagataattgatgatagatgata  
acagcctagtgataaaacatcatgttaattgaacgaaaatagttcagaatggttatactgtgcacattctcatattctgagagcatgataaact  
cattcattgaaaagcaactatcagcgcattcgtttaaagtataatcgtaaaagtaagacatagttttatagataattccgaaaattcttttcaga  
aattattctaacttgccttttataatagaaagctttgtgattccttttaactttgataacagtgtagtaaacagtttctttcacactggtgcat  
gccagctcaaaaaaccaagcattgtaattgtaaaaaataaaataaaataacgataacgcagttttgagtagaaggtaattctcgcctat  
tgtaataacaaggtgaccgtaactacagattacctgaaacctttgattaccacaaactgtcacaagcaaacgtttattcttctatttcaa  
ttagctcgtcgcacatacctaatctgtgagtggtatttcaattatataaaaatagacgtaaacgtgtagtagtgaatttgaaagttggctg  
agctgtcaaaaatctgttttgggagttatataaaaggattcggaaactaatcttttgggttattcacttcttcaactattatgcacttttctg  
ttttcgatgaatatcaaagtttagttttccgatcctacaagcagatcccgcagaatctgaagttctttattgttttcagttgggaactcctcg  
tttactcgtaacattctcctcctcaaacagtttcattatttccggttttggtttctaaaatctttgtattttgtttcgtataggtttctttttg



tttctcaaattctggtgctctgtttttgttatagttaaaaagttactcagtttcaacgttttctagctttttttttgtgttttttttttccaaagca  
tgacagagatatggatactgagtcctcgtcgacttccacctgaaaaatcaaaattccgcagctgcctctacagattcccttcatcccagagaaa  
ctttggattattatattgattatttcgtaaagcacaagtttcaagagacggctaaagcctttttacaggaatcagagatacaactcccttaat  
cgtgaccaaaaatacaatggaagatttctcctcaaaaatggatatacaatcaacagaaagagtcttttcattacgaccaaaaatcttttcgatgct  
gcaaacggcaagtctgaacatcttgattcattcaatgatgaatttccatccaatgcaaacccaacttctgaatccaagaaagatacaactgctga  
agccaacgatttttctatgcctttgccgccccgtctgttctattgatattcctgaaggatttttctgcaatggtttaatttttctgggacgtttca  
gtgctcgtgttagtcgagttaatagctcttcccactgtatgctcatttttaacaggctcggcatacagaggtaaaaatcactcttcttacacca  
ttccctcaaatgtacctaatgtgcaatcatctagtgtaaccattgaattacgctgctactgaattgaaatcttctgaaaacaagccgtacgcacc  
ttttactcagcgtttccgaaatcagatacaatgaccacaggaaataaccgaaatcgtagcctccttcccagctgtcctttttctggtcccc  
cttcgaacataagccttgctgatagatcacagaaatcggatctgcgctacctgctggtaataacccctctgttatgcttactcgttaggtgta  
cctccttctctgttctccaattatccaaatacatcctatgctatcagctagtcacctcgtatcttggtaaatgacctaataatcatacttatgctg  
ttggcccaggatgaaccaagctcctccagaaacggattttatcctctacacccgctcaaatccatcagcttaagtctcagcaagaataccttc  
atcgtcagagcaaaaatgtcagagccagctgtgattttaatccggctacttcaaggattctcaggtacagctaatgagcaacctgctgta  
acctgcatctagtagcgttcaaaaaaaaaatacccgatcctaaagctttatagtagtaacaaacaaaactctaccacaagaagctcagcgtct  
cccataattactcaagcatcttctggaatgggtggaattcgtcttttaccatataataatagagagaggccgttcaatgcctacatttaa  
acctccccgaatatgatgatacaacctggtatcctgcaaatctgaatttggggcaatgatagcagaaatacgtccccgaaacagtgttgat  
ggtatgctcctattttccacaaaatccagttgattgaaatggtaaatggaatgaatccaaataggcgaaccgacttcttccacagcaggct  
catatgcccaactattataggggacaactaccgatgtcaagcatcatcctcaaatgtcgaatgcctactgctaactcagggttcggtagagttt  
gtaaaaacaagagaactgcaatgagaagagggcaaacaccgaacatgtctgttcttcaatgacattacaatgtctggagaagctagcaatgt  
gaacctcgaaatcctttgacagattatcatatgcagctaatgttattggaagagcaaaaacaaaagagattaatgatggcccgaaaagaaggt  
gaaagagatttctttaccggaaacatacagcgtataaccgtgagctaaaaatagtaagtaaaagtcaacaactgatggagcatctcatct  
tcatccaaaccaagtggaggaatgagttctcaagttaaaggaactgatgtgcctacgacgggatataattcaaccgcacaaaaacaaccgagc  
cttccggccaacattcgtttatgaacgttccacaaaatgaacattgtaagtattgaaactattatgataaaatcaacattgttttagcgaatatc  
atgatgtcctaatatctgaatcgtagtagcagcatggaacagcggtaaatgctcagattctagagatccaaatattgcaaaaaagtccccca  
agtaatacagatcgtagtgaaaaagatagaatggctttagaagttccgaaaattcaaatcctggcttacgaaaaatcgtgaaaataact  
catcagatacaaaaagaaatgtcgaatatcaatcatcttactcagcctcccagccaaaattgccttctagcttactcagcatcgtgcatccaaa  
ctctgactcgaacactttctgaaccggtgaaagataaacaaggtatgcaaaaagatacggcagcactcctgatcgcacaaatggatc  
cttcaatgaatgatgctgttcaacaaatctgatgccttcagctggaactgaagaaaatgtagcagtttctcagaggaaggaaatcaatgcaac  
aaagacctcaggacaacggacgtatagaagagagtgctctggcaagactaatgcaggaagagatgctggagacgttactaaggatgggggtt  
tttaatgaatctacggataaacgtttaattatgcttcaaaaatgattccaatcggaatgttaaatgattttgactttgaaagtttttgaatgac  
gctggtgatgattctacgaggttactactgaaacctatagaaggttttagtcttagtgaagctgcaggatttatgttacttttaggggttaaag  
gtcattgctttgttgcgaatggctattgaagttctttatgaattgtatagtgatattatataatagcaaatgtctatcttcaagagactctcgtt  
ttgaaagttttacagaatagctttcaggggattatagctttatacagtaagtgattggtagtttctactattttatataatccaggcgtttc  
agttgtcgtatagcttttaaggacatgtgtctggattatacgtcagttgaggttttgggaaaaatgagaatataatatttttagttagctatg  
aaagtaaacttatttaaagtaaggatcgtcttaataataaggggaggtgatgatcatgagtatcctagtttatttagccaaatctcatagtaact  
tctgtgatattagggtcaaacgctgtattcaagagaaggggttgaatcaatagccatgaaaacacagcaataagggcaatgagagataaata  
cgttatcctctattatcatccttgggtagtttgagctacttgggactccaattatcaaggcttctcgggtgggatttcaattgctcttttaatttct  
gagttgtcaacttcaatttcatgataaattgggtccttagccttctcgttagcaatagatccttccctagcagaactagcgttctttaaagt  
gggatctgtggagtcgctgactattgtcgctggccatggatctactcctagaatttctctgagagagatgaggaacaaatgaacgacgaag  
aacaagtctgtacatattacaatttgaattagttggctataggaataagtgagatgggggaaagttgagttgccttaggagcgggttctatgta  
aacgatgtaatacgaagcaaatctactttactatgatattccttttaataatcatatgttttctcagagtaaaaataggaaacgacaaaagatgca  
aggaatttctttatattcattgaatgtgcatttaagaaagcactactgagttacgaccttctgaagttttatataaaaacttcgactccactctg  
atgtaagtctcatgataaaaagcttgaagtaaaactgacaataaacatagttcttctgtgataagaactgatgaaacttttcattttacaggg  
caggatggcttcataatctttagtgggaatcattgtgtacacaacgaaggatataatgcaacatagtgaaattataggttaatggagaactc  
gatagtttcatcatagatggaaatgcttccatagcatcgcgttgatccttgaataactttctggtttttcaaatccaatacagtaattgtttgatc  
ttatgtgcttacaataatgtcaattcactgaaagtaacaattcaattaggttaaaaattacgaaaactacatgtttctgttcattattatgca  
aaactagcaccatagaaaaagagtaaaaagctgtaaggggtccttgaagagaaggagaagaacgatgcttctgttcagctttgtacttatt  
tttctttccggatccttcatgttatgttattatacaacttccggagtttttcaatttttaatttaccacggacaacctataaattttttatacgaa

gctcagcattctcgggtcacgattgtaatTTTTacgggttatgagaataaatgtcagtggaataatatctacgattgtaggaatgtatacttcaa  
ttggactctggttgatactgcgtatatagacgctaataatgtccagggatctggtgactaaactgaaagtgttcgataatcttatttagacaaac  
cagtcgaacctccaatctggagatgctggctgtagactgatgagtatatgtagatttctggtataatcagcatagtgctcgttagtgacctcatt  
ttaacttcaacacataataaacctgctggacaatgtcgtaccaatagactaatctgtacaaggagtttaaccttcagaaatcgttaattactatc  
ggtttctgactatacatgatcaatcggattgaccatactctggtagtttatgaaatTTTTctggtctgtgcacaatgccaaaggaggagat  
acctgtagaggatgtgaacgtttacttgggagaataccatggcagccataccgacggttatgatacctagctaccaactaaatTTTctttgcacat  
cgcttaccctgatccattgctgctgctgagtttgaccggaggagtcacctcatcctaatagttttctgtatgaacaggacaggcagta  
ttaaagacaactcaattctggcctaacaaggcaaagggaaccatattattagtaacataactgttctaataggaaatagtaagggttatgagt  
gttattgcccgaaggcctagagacgaggactatggcacagcgtgtcatccatcagtaattgttgatattgaaggcggagtgca  
cctcacaacccggactcctcaatgtaagcggcgtgacgatttatacttccgaataaagtgtatgataaaaaataagtttattaaatcat  
cgttaaagggtagtaataaagtacatcaattcggaaaggcgttaaatgccttaagtgtacattgggaaagtgcagtggtgaaatcataact  
acaaaagtgtcaaaagacttaggacataaatttgcgaaaaagcaaaagtacatcatcgagtttgaatctttataactTTTcttaccattataacc  
aggttattgccttaggaagaaaactaagcattaaatTTTaaactcgttagagaaaaaaaggaccttcgattgaatcagttcaaaaaatg  
tctgtcaaaaaggtagaagtaaaagattataagaagggtgctgctgcttttagccgaagcattttataacgatccagttcatttgtacttctggac  
ctcaaatggggaacagtagagaggctgctacaagattgcttgagtacattgcttatgcctgttaatgcgcggtcatgtctccagttgatga  
ctttcaggcgtgctttatgggctggtccaggtgaaagaattgatgattggtataaccgttttgagaagtggttatggagatttttacaactgg  
gtgccgaaaatcgccatcgtttctcaatgaattgattccgttacacaacagagtaatgccagaagccatgaaagatcgaatcgataatTTTggt  
accttatgtttgttggtgtaaaagcaaacagccgaggaaaggatacttcgaaaactccttaaccaatattagacattgccgatcaaaagaaat  
cttctgttatcttgaatctactcatcctaataatcgcccagggtatgagcatttggccttcgctgctgcaaacgttcaataaaaaagactct  
gatattccgatcgacttatggttcgagagccatagctctttggattcagaacaggcagtagtaaattgaaaaatcccaatctttgctactg  
caaacgagctgctgtttctgtcattatctttaaattatgaaaaaactttacttttattaagggttcttttttgtaaatccacaatttatt  
gtcttctctgtctaagcaattggacaatgagtatgattgtaacatattatccatgatccggatgtactatattctgttactttatcgtaacgaat  
tttctattcattattggtgaatttgcataaccatgtaataatgcgttttaggtaaaatatcttcacagtaccattcatgtcagaacaatattgatctc  
aatcatcctaataaacaagggaatattcattttaaaggaaataactaagttagtaaaaagaaggagatattgaaaatttagataactctgt  
tacatgtttcttatgtcgaacagaagatacacaactctgtcagttcaagaatcaaacactgcatatttttaagaaaaacttataggatctcttg  
gaaaaatagaatggtaataagggttagttatcatagaagcaatgaatgtaagcgtcttctcaactctgacggttaataagcttcttctgtcgc  
aacgcctaggcatcaatgtttcacgggcacgtcgaaccaataaggaagaacatgataaattggtcccaagagacatactggctatgtg  
aaattcagggacttcaactcttgataagctgcaagtcataagtaatatccgacataccaacaactgagccaaatacaaatgatttggct  
tgtatcaatTTTcttttcaaaagggtcacaactttgcaaatagaagatttgtgtgggtgcaaccataatccccattacctttgctgggatt  
agaaggagctgagaagccacgctagtccaggagctgctggaagcggctaagaacaagaatccattgcaccattaaaatctcgatctgta  
tctctttgtgtcatgaatcaaatgacgggctctgagttatagggcctcggacaatTTTgcacccatcagccaatcttcgagagcacaat  
gtctcatatgctcattcaagattcctctggtcTTTTcaataaagtgtataagttgtgtacgatagcttctgcttattgtattttctcatcaaatct  
aaagaaatgaatggatggtatcttgaagtaagtttctggcatcctgaataaaaggacacTTTTgttgggcaaatcgcacactttctcag  
aaaaggaccagaagcgtgaagcttcttttcatatggagatagcaagggtcgcattcaaaatTTTgggaaaaactagctgcaggttggttg  
gatgtattattagaatagcgttgaaccggaataaaactaagggttaataatgagcgttaacttgatcgcaagaagagtttcaaccttaga  
agccaagtgcatacttaacaataagagtcgaaagcttctgagcaatatcatgcatTTTTgtgaaccgttaccattagggccttgatcttca  
ggcacagaattggcgtggaacaaattgacgaggatcaatgtcgttgggagatcaatctctcgagaagaattgagacaaggagatatcca  
gaagcttgaagagattgcatgctttggatgagtgagtcgagtttccactccacagaaatgacgatagaaagtacgacggcaaaaaggggcat  
agaggaaagaaagatggagagtatcacaaaagacattgagctatggaggtctttaccagccaagctcgagagcaaatctcataaataaaaa  
atccgcgagcaacatcgccaacgaacggtgactcaatccttggaaaagccttctgaaagaatgaagcttctgattcgttcgtaaacccatgc  
tattcaagagacggctgcaccagcgcgatacccaaaaggagcttgccattgcaagaagctcgaacgcaaacgaaagaatgatttctc  
tgTTTTaaaaaggaaatataaaataggaataaaaaacaagagaagccaaaagactggagaaaacagataatcttctgtttagcagagatt  
aacaataacaagagtaagaggcaagatctTTTTgtttagaattatttctttctctatcttcccgttctgtatttcaaatgctttgttgaaga  
caaaaaggagaataggaatcactattacaagaaaagtgttatatttttaagaggtatttcttaaaaagcaatggtcgtTTTTtagcca  
aatagagcaagcgtatagtaatggtagcagtcgatgcaaggaaaattcgtacgcaattgccttgaactctgtataccgcacaagaactgact  
ctaaatatgtctagtcttctatgatcaaaaaagcaatgataaaacaaaatcaaaaagaacataaaaaatataaacaataacaaa  
atgaagctcaaccgtgactctgtacattattatacTTTTcttctttacgggaatattgatcccctatagattgatagatactatcagtgagg  
atggtcattatcagttataatgattttagaatccttctttaaataaccgttatagatcgaacaggacgttaaaatagagttcagtagacgag

agtactatccccatattatattgttgaaggaaagttttaagcaacgcttctgtttggggtatggattattgatggaatgaagagattcagctttg  
gtttgtcatttcatctttgttggctgtttgtttgttctgtgggtaacgtagtgaaaagatccaaatagcgattatctggacgcaagataagccg  
ctacgtaaaacatgatcaagatagagctgactctaaaagaaggtgaaattgttggaatagtcgacatgatgtttgaaaggttcgccgtgaaat  
ggaaatgaataaaaaataaaaaaaatgtaaaaaaggaagatcttcttcttagcaacaaaactagaaatcgttataataatcgcgttctttc  
atccttggaacatacatagtagattgcactagcagagcatgattaaagcagttactagttcagtaattgttttagtcttccgctatcaacgact  
ggaaggggtccgagtggttatggagctagtttaaggcactagtgcaagactcgtgggttcgagtcacccctttcattacctttttacctttag  
gttttggaaacctaaagatcaagcagatctgagaaaggtcctcaatctgcctagtgggaaacctgaaaaattcaagtctgtttacgtttcactttt  
ggttactctcagaatcataattttgggttacttgggttactaaaaggatccttgaaggtctaaaaacaaaaataaaaaataaaaaata  
aagaaatgaagactagtagcaaggttatcaagtgggccaatccaaaaacagcatggatgagtgatttagaatgagtagaacattgccacaa  
aacttggaaatcatcgtagatctagatgctccttgcatttctcctagcttgacaaagtttcggagggtctttctgtcgtgagctgaatctgaatct  
gaatttataagtagctagtttctattaggattatagcgaagacacgaagatacgggtgtctttgctatatccttcaacaaaccctgtaccat  
ggcatgtccatgatgcttccaattgtatacaaacggcaagggtgataaagaaggtactttggttaagtttggcttctcatcgtatgcgccc  
gtccataaaaaagcttcaacaacaaatgatccagagctcgtgctaaagaagagataaccatgtgtattcagattatgaaattagcataat  
gtattgggttattgagcaacttgcatactaaacagaccatttccaagtcctcgcaaaaatcaagacttatgctttaaataaaataattatatactgtca  
tcgaagatatttagcatgcatgttctgtctgtaacgtattatgaacgttcatagaacaagtagcttcaaacgaatagcgttcagccaaaaataat  
tattctttaaagctattgaaagaacaatctgcactgattttgttgaggatacttattaccaatgacgcttgaaactgcaacaaccattttacta  
attgtttctattcttctatattcagcgttatttaaatcgtcaacataaatccctgatcggatttcttaagtatactgtttcatccttgggtttgcctt  
ggctagcacacgcagatgtttcttctgtactctttctgcgatgattacatacaactcaatttctgtaataatgaaagaattgagtgaaagtc  
agctaaatcaccttagagattacttggatgaacagttactaaatgtttctcaaaacttcaaaaaagtaggatcttgtaaacgcaagaaggctc  
ttttgagcaaacgttcgattgaatcgtaactaatcaattcgagatttcatcctgggggcttcaatcacttgatgaattaatcgtgatctcgagc  
cactacttcaagtgctggatgctatgcctatgcaagagactcattcttggctgtcaacgctattctacgagggttgactttttattgatgagattg  
ttgctttccaccggcacctgaaccaatgttcgagcattgtcggtttagatggcttgagctcaaacgttcagcatggaaaactctccacaaca  
gatgcaatccgggttaaaaagccttttggaaaattgctgatgggtgtaatttcaaaacttagtgaggccaaggctatgaactgaaatgctcttctg  
ttttcgaaagaacactaaatgatattgacttttaagggctatgaatgtatgacaatatgtctcgtggactgtcttcaacgaaaggaaccaacta  
ccgatatttctcaataaattctattttaattaccttcttttaattcatgcacatattgccaatggaatcttatgtacatgggtcatatttaccaga  
gaacaagccgacattttctcattttttccgcaaaacgctcaagaatttaaataggctcttgagcccttttctcgaatttaccatttaaatct  
gtatgagaccctttattttattctattttgcaattcatgcaatttttgtttacataccatgttacctaacgcttattgttacttagggcagtaattgct  
tatcgtcatcatagtttagtttcttctaaacagaccgcaaaagtcagatcgaattgcaagatttctatatttttagaaaagttcaca  
ttttgccaatttttttaaaaaaacagtttatttgaagataaactaacctgtttgtttacattagagggaatacacctaaaataatttgggtatata  
ctataatcaagtaagcgttctgcttgcgaaagctctatgaacatattcattcaaaagccacggcgaccaaccttcaacttcaattgaaaatcaa  
gatttggcaaatattccttggctcactgggctagctttataaaatggaatgtagatggcattcatgctcgtgattgcagcggacaaaactaatggag  
aacctgttttgaacataaagtggttgggattacgacgcaacgacaatagtcgattgtcgtagacaataactaatcccttcgagaacgattttt  
agattttcatttctcagtgaaatctacagcaattctggagcaacgaggctaggtgttttgaataaaatttagcggaaatgctggggctcgggtta  
gattctcgaataatatttctgctgacagtaaaaataatgctactcttctgattggcattggattgaaacaactatcaggcactgaaaactttcatg  
ttgctaaaaagcttggaaaactcaagtgtttagcggtttagctggtttattgacagaaggaagaaataaaacgcaaggatgatgaagcagc  
tattgctcctggtcctcctcaaacgggctgagaaaatgcttacttctattaaggttttaatacaaaagctagtagtttcatatgcatacagagaa  
atacaaatacgacaccaacaatcgttgatgacatttttttgggtgatctggctggcggaaaggcctgtattatcggaattcggatgat  
acaactgatcctaattgattgctttgaaattcgtcaaaaaagctgggtattaccaagtgaaaagaaaaaggtaaaccttttactagactaa  
atattaagataagtgtaattctattcttatttatttatttaggcacaaaatctatttatttttataaccccaaaatccgttcttgaagagta  
taagatgcatgtatctaaagcaatcaagtaatttctatcttgaacctattttcatgaccattgttaaatcattaacaaaaatctggatgagcgtct  
atctttctcatcagttcatgcagccgtctaaagatacatgtacatgctcgtactgaatgattctaaaaatcacataccatacattagggctga  
agtacaaccagtgaccatcaacctgcagttggaaaagcagatttgatagcattatccatcttcaaccattcttaagttcttgcgttgatg  
acgaagcaaaaatacaagagatcttgaacttttgatagctgaatgataaaatctgacgttcagtttcaaagagtgccgaatcacgttttaaat  
gctttccagttgttcagaagcctttctgagccgttatggatcataagtcgctgtttacacaagcttggaaattctgctaaacccccgaaaactcttt  
ggttgattgtttccacatactcaaaactcgtttatgcagagatccgatactgtaaaactcacaagcgtatgctgcagcgtctgtctaatttcatc  
atcatcatcattcaaaagatctccagattaaaggtatttacaaatccttcaaatatttattcaggctgctgggaaaactaatcccaaaa  
tgaaccaacgaactaaagctgcctttctagtagagaatgcatgtattcatttgaagttgagaagaataatcaactttcatagtaactca  
taaactcattactgcctccaagaacaactgtttaaggtatgaaccaagaataatcaaaagactctcacgtactggcaagcttctgtttagctgca

cgactgcgatcatattggtacaatccaacatcatagattataatctcgcctctaaaatctgaaagtaaagcaagggcgggtgcacgaagct  
gactccactgtgttctatagataagtcaccaaagctcgattatttccggattattgacaataaccttttctcggatgatccaatatgtgctca  
atgtagcgatttgacttcgtaaaactcgtatctgagcaatcttgagacgagaatccacttgagtggtatcgctgtgtacggaaaattcttcaa  
atcttgtaagaaaatttccgcagccgttgatgatgaataggcaatccaataaaattataccatgaacaggccatgattcttttcaaaaaggat  
acgcttgcaataatcattgtcatccttcgcaattgctgtaattcttttagcgttctatcagatgtagcataaagtaatttgaaggatttcaaaaa  
aagctttttatataagaagcttcgcttattggaagtaatttccggagaaacagctcagcaaagtaaggataccttgctataaaaaaggctttcgaa  
tctctacgaggttataaaaaagaccagctaacaatcgctcggacagtaataagcaccatgtagctcgtttgtgtaaaacctcaacgttttta  
attgattaacaaaactccgcaagcgtgagctatcaatcatgcaagtaatgataatccgcaatctcctggaccttacagatcttgtagccgt  
aactggagtagcagaggttcaaacctcagctactccttccaatctcctcgtttggataagtgtgaagcaaacctgtaagcgagaaaaaagttta  
agattggatagaccggtgctcgttgattgctagagtgtaaagtattgacactattttagctcgtttagcaaatatggccttaaggaaggaaa  
cttgctaaaaaaagtttagtcgaaagcccttggattttcaagattaacagctcccttaggacgtttattgcaaatgctctattcattaatgccgt  
aaagagcattacactacaattcctaattgggccaataatcatgagagaaccttcaatagctaatagcaatgctggttcaaatattccaatgacac  
agatgaaagcctatgtccgtaaaaattgttttaaggggttcatcgcagtaactgtggaagttcaaaccttccagcatttgagtcagctatca  
atcttttcttagccaaactaatcaatgtcaaaatagctcagataacaaagcttgtttctatctttaccagctactaaaaatgctgtaatagaaaa  
gggaataccgccacttctcgggtaataatgacgacttttctgaacgacgtctatgttttctgcaaccaaggaatcggcatttgacataacttt  
catcttttttagcaaaaggaatgaacaaaagctgacgaaggaaggatagacactagtaaggctcctcgtatgctaatctccatagccaactc  
atcatcaagaaccataatgatccaattagacaaatgaatcgtctgggtaaaaagaactgcattttataagatcgtagataatagaaatga  
tatttcttaataacttccaggaataacttagtatcaattgagccggcgtatcctctaaatcttccggttacaccactatcatcttgaccttttgtaa  
ttcccttaggggaatcatcacaagaatcttcaacaagtaaccatactgattctgacaacaacaatacctcaatgattaatcttccattcag  
tatcatctgtcttaagaattgaaattgaagaagtgaagaatgtataggacaactgaatcaagatccttgaatcggataactaattgccgctg  
aagtaatgacttttagcagcttaacatttctctgtaaaatctaaaattcttcaagctttttaggtactccaggtgcaattttccatgaaa  
tgattgcaagacatattgtcttgcaccacctcactcatgaacctgaccgagttgagcaagtaagaccgtgattaacaagaagcttaa  
ctcttcaaaagtgtataaccaggcaaaccttataggatagtaaaatattcaactaagatcacggatagatcatagggatcattatcagatc  
aatcagaattcgggtaattcctgttttaaaatattaattgaaatggaaaagatgctgcctttcttcaacattgattcctctaccaactcgtctaa  
tcccaaagtcaccaatgttcaagaaaaccaagagaggaaagtactgtctgataattactagtgaggatgtaaatatccaatacagatggaaata  
aagtactccaaaaattctgagaccttcaataatcttagcatcatcaggtatggaagaactcgccttgatctaatgttctttggagagcatgac  
aagatgctcggatccttacgaaaaagtcagcattgatttaacagaatgtcctggatcggaaatcgtctattccaacgcgaattggatcctga  
ttctatgcaatcaaatctttagcgggtcaaaagcaggtgataataggacaaagagcaattaaattgaaacaagcaagctgtattctaactctt  
atgcaatatgaggttagcggaggaagaatgcttattgttagatcgagatgctgaataagctttccatcctttgctatcttcaaaagcgaacaaaca  
ggcagcatcttggcgtccttgaacgtcgggtagttctgtaaagaagatagaaatctcggagtaatattaggagaaacacttaataatgatgg  
gattaaaaaggaagacattccatttgagctggtgattgtctcataaaactcagcaagaattcaggacaccacaaattcatcattcattctct  
gcaactcttgtttcgtatcttcaataaagtttgtaatacaagtttaatacagtaaataccgtagtagatagcctgcgcataactgtaatcc  
tttaaatatttaaatgaacgtgacaagaagtcaggtgaaaggaaaaaacagcttccgctccgctatattgacaaggattgaaatagcagtaga  
cacaactttgcatgtctgcccataatagagattgctgtaaaagttggagtaaaagcgttttcttagctctcgtttggcaagcaagcaaaataaa  
gttgcaatgttttagagaataagcttttacagctaattgaaagcctgtgactccaggaatagatgtccgtgttgatggcaagtaagaagggtga  
ccaaaatgaggttctatcgactccaaacagtttttaataaataatcgcttctttgagggcgttaaaaattctccgagccaaacactgtagcat  
caaaacatgcaagttgagtaggacctcagcgtaggatgagtaaggaggttttaaaaattgataagaccgaaggaaaaggccatcttgctc  
tgtccaggagttcagctgagtttaataaaaaactccctacactcacgaaatactgaggattcgaactgcaaatgcgagtaatcgcttcaaaaat  
agataaaacacttttcttcatagaatgaatcttataatttaagtaaaagttggcgtcctattcaagatgaactcaaacgtgaagtctcatcaaaa  
tttgccttctgtatgaaaagcaagaagagagcttagactagcaacactgcttaaggatttttttaataaacaagaaaaaaactagtagt  
atcttttttagaccacaaaagcaatcaattggacgacccagcagtggtggatgaggactgaagttgagaatggcagtcctgaagcgcgcg  
ccaagaacctccaagcagcattagaaaaataaccatttggtaccaatcttaactgaatctcatttcatccagttctaagaagattatgctaa  
aataaaaagtactttaaattcagaaaagctagattcggtaaaaatagagggtagcagatttttctcttttttttttgagactatagcagaagg  
aagccgttaattatataaaatattaagttttatcgaatattcggaaaaactatacaaatgtcgaagattttcacagtttaattggatcct  
agaatcaacgtgcgattcaaaaatgtggttcaaggaaccacgcaagtacaaaagaagggaattcattggccttgatggaaaagattgc  
ttgtcaagctaagactggttctgtaagactgctgcatatttaattccaatactagaactttgttgaagcagaagctgttgatgagaaagatcg  
tgggattttacgttaattctgttctacgagagaactcgtcaacaggttttaagtttggagaagctgactcttattgtgtaaacacataaa  
atgtgtaattgctacaatgctgctgactcggtaacaactcctcactcctgattttctgatattgtaatctccacgccaagccgttctgtt

cattttcctcaggagctcttcgctcgacaagataaagtttctgtatcgatgaggcagatttgattctctcttttgatcaggatgatatgtcca  
ctttaagcaaagcactccacgcggttacagacactattaatgtctgccactcttctgaaagcgttagttcgttacggcagttagtttgcgtgat  
ccagttgtttaagacttgaagataaagaagcagggggacagtaacacaatatgctgtaaaaacatccgaacaagacaaattttgctgcata  
tattttgatgaaattaagacttatacaaggaaaaatcttggtttcgtaaacgaaatatacgttggtatcgttcttaagctttacctgagcagttcgg  
tatgaaaagtttggtttgaactctgaattgccaataaattcaagaatgcatatcgttgatcaataacaataagggtctataccaatcattatcgca  
accgacgaaaagcagataaagtagctgaaatcgacgaagaaaagaagacagcaggaaacaactgacggagctaatgagaagaggactca  
aaaatggaggaagactcacagaataatcaagattctggacaagcgcacaaaaaaccaaaacaagaaaaagaaagctgtaaaaaggatc  
gtgagtatggtgttctggtctgacttgaaaaatgtctctgttctcaatgtgatgcccacaagcacaagcttacattcatcgtgatg  
gaagaactgcaagagcaggaacccagggaacggctatgtcttcttcttaagtcagaggttggaagcataagcctacaactctggttact  
tgcaagaaagacgaatccgtattgaggcagttgaacaaaaaggcattgagctcaagccttatactttgataaaaaacaactgatgctttcg  
ataccgtatggaagatgctcttcgatcagtgactccgtagctgtgcaaacagcccgtactgctgaattgctcaggaatgctagcttctgaaa  
attgaaatcactctcgggaaaatcctgatgaattattgacctgactcacgatacggcagcaagcgttctgtagccgactcaaggcattt  
acgacacgtccagaataatctttgcaaaggggctcaagctgtaacaaagacgttgggtctgccatataaaaagcaaaataaccgtcggg  
ctgtaagaaaaagaagacgcaaacatcgtcatgatccttgcgctcgatgagaagggttaaataaaatattatgtaaaggacgaaaggct  
cgtcattttttgttatttcttcttcttattttgatcaattaatagggtcatgaggatagggcttaggaattgatccttaggattgttaaatatt  
taaaatgttttggagcattataatgtaataaaaaccacttgaacagtaagaatgatcactattattgaggtcaagataagtagtaacaa  
acaatgattgtgatacaacacataatgataatgattaataaaagggtagtcttcagttcatataactggttaatgtagattttcaagt  
acctcaatttaccactttataaccaatattgaaagaaagacttaattatttcaactttatactttattcagttttggtatttttagattacata  
ttatgtaaaaagcgttagccctcacgacaacaaaaagctgctcaaacacacaaagtaagttattctattgttctagatcaagcaagtt  
cttgatggattctctacagaaagctcacttctctgatcatggtaaaagcaagatcttaagtgatgattcccaaaattcctcaacatggatg  
atggtttcaaaaatcttaacacctgagaagtcaggagaaaatgctcaaaatcccctagtatttcaacaaaaagaaataatgtagattttg  
taaataatcaaccagatttagaggaaggcgtacagattctatataatcttacagttggtatgagaagctatgctcacttgtctgaagaggg  
gccatttctggagagttggaccaagaagatattatgaattagatgattggtccttgaagcaactgcaagaagaaatgacttaccattat  
ttcaaaggaactatgggattgtcactgaatggtacggtttaaaggaaacgaattccctagggaaactgtaacttggctcgaagattatcct  
catttggtagttgaagttaccctcctaattttcgtgactttgtgagcttacaagcgtccttatgaaaccataaacgttaagattacactt  
tcttcgaaaagtacactgaatgacttattgaaaggagtaaaagtacactttgtctatttctggtgataactccgactttggagagttgacacagaac  
taccacttcaacgaactattgatccatcttctttataaagattagctcgaagagattgtagaatccttgggaaaggaaaaacattagtcgagt  
ccgggatggatagtagttgtcattagtcgttgaatgtatgtacaatgaaacatggcctgtcgaaccgtccttaagacttcaattttgattcgtcag  
agagacaaaaatcaagtgctccttggaaaaccgggaaagtaaggtacttggaaactgctggtttaaataacctaggaataacttgcataatga  
attctcgttgcaatgctcactcactcgtgagcttctgacttttcttctcgatgagtggaaggatcaagtcaatgaaatccttgggta  
tgagtgccaaatgtgctcgttgccttagttagtctctgtataatcctgatcacttcttctgctccccgacaattcaagccataatg  
gtcgtttaatcactcgttcttaggtatggccaacaggattccaagaattcttagctttctgttggatggtttacatgaagattgaatcgtattt  
atcaaaagccataactccaagcctgattatagctggatgaagaaaagattcgaagtagctcagatgaatgttgagattgcataaactt  
aggaaatgattctattattgttgaactgttcaaggatgtacagaagcaccctggttctcctgaatgcaagactgttccattactttgaccattc  
atggattgactcttcccttacccttacaacagtttggctcactcgttgtttttatccctctgatgttactcgcctcggattactgtgacttatt  
ctcgaacaaaatctgctacaatcgagatctcgtcagtttgcgttccaaagttggttgataattataagagaataacttgaaccgaaact  
atagaggaaggtttatcgattccttactctcactaaatccttttaagaaattcagaagaggacgaaatattctctacgagttggagaa  
gccttggatgaagcatcagatgaaataatagtcgggttatcacagataaatcctcgcctaaatcatcaaacagctatctcgataatcgtga  
atgtggtatcattcatcctcaattgaaagatgcagagattaataacgctctgagattgagaaaaacttaaaacaaaatagtagcaattac  
gactcttgattccttgaaggatgccgaatgttagagctctgaattccaattgaaatgaaggaaggacctaagtcaatgaatcctcaaggat  
aacgaaagaaagacaccttggtaataactaaggtattccatgatcgttatgaaacggataccaaccggttgaatgcatcctacaatcttct  
ctgcttacagaccgagatgtgaaatcttacaagcactgtagagcatcattaatattgatccattcgatggtgatgaaggtgaaaaccaagc  
caacgaggccgctcctggtcgtatcctgacctccaagattgagaaaactactcagaagaataccaatcttctgtccaaggagacctttggt  
ttgtgagtgccggaagcttctcagaccatgtgtttaaagcagctacactagttctcctgatattgggtcgttattatggttagacatggaagaat  
atgtctgagacaaaggaaggacaatcgttcgatacgaataaccctgacgattgtctaaatgaattgagaaaactgaacagctaggcgaag  
aggatccttggattgtccaagtgtaaagattccgtagagcatcaaagaaatgagaatattgaaatcctcctgaaatcctaattcttacttaa  
agcgttagtagtagagacgattccgtgataagattgatgaattgattgaattcctattgacaacctgacttctaatcacaacggaatcaca  
aaaattcgtagatgcagatgaaaatggaaagtggtttatgaaactatgcgctgttgataatcattatggtggccttagcgggtggcattacacatc

tttcgctcgaaccagatgacaatcagtttactgttatgatgactcgagagttcacctgtgaagcctgaggaaactataacgtctgctgctatt  
tattttttatcgaagaaatcgacataactataattcaaaaaacttataaccgttgattcaaacgttctttttctttatattttctacaggctaaa  
aagtgttactgtttgggtggattatcaacgtcggtttctaacttctgtttaaaaaggtaataaaaaagtaaaattacattattatagctctttgt  
gtttatataattcaattatacagcaatccagtacacagaatgtagcaagctctggatattatgatgattgaaaggttgaatcaattccaga  
tcaagttatatagatgaattgagacaattataggtatttgcaagttcaagaacactaaatacgtgataattatcacatactttcaataagctt  
gatcaatgccacattgctaacgaacaaaagtaggaaaatagcaatcaagttctttttttgtttataactttatccttctttcttatagtttgta  
tgacattagcttaattagtaacaattattatagcttgcgtttcattgagttggcattagaaacatcaacacaacatattttccagcttaggtgaag  
gccccaaagtgacacgaatthagagaaattgagaatcgtttataaaaggattaataattaattaaatattggcacaatggatattgctttgacg  
aaataaaaaaggaattccagattggaattataggtattggggataggggtgcctttacgcagaacgattcagtcagctggatgtaagta  
aaaaaaaaaagaacgttatgttaaaaattgattctacgtaatactcatgtttcatagtgtaaatgtgtgatcggaaaggaaaattcgaagcagt  
aaaggagaaatgcatggaaccacaataaatgccctgcaagatgggtttcaggttcaaggaagagtgattatctatatagcgtcgagctg  
agtatcttgatcgcatcgttggtatgtacggaccagcaacgaaggtgggtgccattgtcggaggacaatcgtcctgcaaatctcctgaaattcgag  
ctttgaaaagtacctccgaaagatgtcgaaattattcctgtcattcaatgcacggccaagggtaaaatcctcaatctcagccattagtgatt  
cgccatcgtgcaagataaaagcttcatgatcgaagagaaattcttctgtcttcaatctcagttgttttttatcagccgaagagcacgatcg  
gatcactgcagatactcaggctgtaactcatgctgatttctcgaatgggtatggcatggcgtgcgaacaatcaatatcctgggaaataaatcg  
ctggtcggaggattgaaaataaaaaatgaacttctatgcaaatattctagtaaatggcatgtttatcgggtcttctatttttaacctg  
atgctaggaacaaattaagcaatcgcgactcagtcactgatctttcaagcttgcataagtggaaaggcacaagaattgaaagtagagta  
cgtacagctggaaaattgtattggcgaacaattactgcctcctcagtggtattgttgagtgatgagcttctggatcaatacagtatatctaa  
tgttcctaatagacaagtccgtcgtaaatagtcacctaagcattttagcaattgttgattcttgggtgaaattaggaattcacctcaaaagcatatg  
atagctcaactcattgttgcactttgggtggcgtatcagaatatgtttctgcaatcccaccttttgaccagctgcatctacacagctactaag  
cacaatgaattctgtcctgatgttggagttgtaatttccgcaagatcatggtctgaacatgttgagcaaggtgactttgaaaattacaaaaac  
aattataaaaattcaagattattccgacctagattgaggaggcaacaaaagtgggcaacgcatgataaaaaagcttcttgaaaacctcaaa  
aaaacggcataagctgattacataattataagcttcaatgttgggtgttttataggtataaggaaaaaaaccccccccccccccccccccc  
aaaaaagaatgctcctaactagctctgaaaaggttgacagtgaaacacatacaaatcgacagactttattcattccgctatggaacattaa  
gtattaggaagtaaacgatgatgaatataattgttaattatcaaaaaataatataataaaggaaaagcgtatgaacaatcacttcaacttt  
ttataaaccaaaaatgggaaaggattttgacataataagtaataatgcagaagaaaacaatggaaatcacaagaggcaataaaacctttt  
ttatataagacttagtttagtttaaaaaaacggagacagtatagaaaattgtaaatctcggctttttggagtctttatccatcaggacga  
gcaaagccaaaacattctgcttcaactcatgggcatattttggatccttagaatatgattgtaatatccataagccgaagacaaacgaattgttc  
acacaaaccggcaaacctggttaatacattaaaatcgcaacaatacagcttctccagtaactatgggataattgttaacatagtgatggtagt  
cagaacgctgcttgaaaacagagatattatcgtgcaaaaatttgaaattttgggcatgaattcggcaatataaagcgtttaaataaagc  
caacatagccctgttcttcaagggcaagattgtatcagggctttctgctcgtatcttcaaaagcgtcaggctcacttactaatttaca  
aagaatgtaaggcatagaagacgaatcatagaacagaagataatgcaattgggaatagctgctacgcaacatcttatctgaagaagcaa  
agaagtagcagcaaaaatgggcccgggaggatagaggaatcataaatgtcgtaaagcggcggacaagcataaattttaccaacattatcatc  
aatcttttctcttgagaatgcaagcaacaagaattcagaaaaatctcgcgaaataaggcctttgagatatgatcgtttctggcaagattcca  
acgaaaagtgcggccatcgttatgaggggaatcattagagagtaaataggttttaagaagttctagaaaagaggcgtttttatgaagatcagt  
agaaaagacaccatcgttctcagcagacgggaaacaaatttaaaataggaatttttgaggaaaatcagttgattaaaactaactcattg  
agtcaattagaatggcaggattcttgcacaacgacacaaaatgcttggattgtcaaacgcttctgtaaagatagagatgaatcgatttctctg  
gatcatagaaggggaaacctgtaaccgggtgaaaacaaagcagcatcttggaaaaaggatataacaactcacagatgacagaaagcatgtt  
aatgaaaggagtacgttagcttagctgccaatcaatccagtatgtaatcgcaagatgcagaattcggtttcagcaacccttgccttatattcttt  
gaatctaagatacagttatgaattacagcaaaaagcagagcagaatttcatctgcttttgcaatacgtcttcaacagcgaagccccatca  
ctaaaaaatgtagcacgattgtcatcttctcgtcaagaggttgccaaaaatctcagacattgcttgaataacttcatgtagcgaatgtctc  
ttaacttattcaatgcctttggaatatactttgaaattgagggcgttcattgggattctttgattgatctgctaactgttgaaagaactgtgcatcat  
caccagctgctattcttttagtaaggttagttcctcaactcaattactcaatttcaattttctgactggactttcaaaaacagtaagcattccttt  
tgttctttattgttaaaataaaaaaattcccttcaaatatctttctggcagaccctcacgtctacacctttatgttggtgatgatgg  
aaacgaatcgacaactgatggaaggttaagcattccctcctctggcgcataaattgctttacataatttagtgcgttgaatttattacta  
caaattatacttatattttataatagagtgaaaattatgagagtttagacatataatataatataacagtacagaatatccacaatgcaagtt  
cgtctgaatcctaattgttcaacttaagtaggacgaaaaaaaagcctgaatagaactctcaattatatttaaaaatgagatggaatctcgt  
cgtggacgccctcactcggagacagcatctattcacaagaactgtaagtaaaaattgttcatgatctatctacatgcaaaagtgtatgcttaa

agccgcattggttatcctcacagctcacggcttctggtgcgatattatgtactctaggtgacaaaaacttctaactcataagcagtaaaatctctta  
tgtatgcttttgagatgatataaatcctgctgccgacagtgaatgtcttggagaatgtcgttgattatataaatgaaatggtaagtactc  
aacaatggcgtctgtattctattcaaagtgctaaagatgtacagtgcttgaagcggctcgcatactggcaatcgcaaaaagtaaaagtga  
tgactttaattgctctcgaacgatcctaaaaagcttgccgttgaagaattactggtcttcagaagatgattgcagatacgagaaatgtt  
atgaagtaacaacaaagaccatttttaaatctcaacattttactgatactacgcagagttggcatgtcatacttttttagatacttctgtctga  
ttttcttttgttcgcttaagttttctgtataatattcaactcttcaaaaacgtttcaattcagccaagtgtccgaatatgttctctttttgtatat  
atagtttaattaatattatggactaaatgaacttttatattagaatataaagaagaatataagttggtgatgagaaattataaaatcatata  
taatgtaacaagcaacctggtttttgtaaaaaggaaatcaataattcatttcgaacccatgatcacatatacaatataatcgtaacattaatta  
aacagtcaagaaacgttttatttttttagctagttatggacgagctgtattcttctgatagggataagaaggcagactgttattactagg  
ctccaattgagttcgtggaaccagctatactaaaagcctctcatttgcacacgatattttcaataaattgctcagatgttttctcaatcaatgaaa  
tattgaccaaagtctactataaaggtaaacagtattcttctgtgcaaaatcacaatggcttcaaaaaacgattagaaaacaaatagacttctt  
gatccatgaaaggcccgcaagtgttttttcttctttatagaatacgtgtaattcaacaagaaaaagcatgtcaaattttcaagacaaaaa  
agtatgagcatgaagatcctaaacttaatttacagttttatgtataacggtatttaaatgtgattatgacaggaagaggttggcacatcgg  
aggatcgttccatttaaacattgttcaggctcatgctgttaccctctgttcatcacaacagcagcattcaattttgtacgtatccatacttag  
agcctccaagccaacattcttcttgcaggaacaggattagctaaacaaaagaaaagacgctgcatagggctccggcaaatcgaaacagat  
aagatggtaagcttggaacccataatttgaacatcacatataagattatactcgcgccaagccttagatacttattgtaaagctgatcgg  
tcgtaacggctttcggaaaggatgtgtcggaagtattgttatgtaataatggcgacgaccacatatctgcatagaatgcattgtaagatc  
caggagttaaaattcagggtccatgaacggatcacttccaatacgccttactttgggacaatgcagaaggaagctttctgtgttccaggat  
cacatacacatcacaagctcaaaaatcagtaattcgaaggacacttactgttaattaaaatatttcaggctttaaattctgatgctattctt  
tgagaatggatgaagcactcctgtaaaaattgcttaatacattcaaaaattttcggttcagacggtcatgacgatcgtaattaagctta  
gcaaatcacctctgggacaaaaatccatcaaaataccatgtgtcactataaaggagaaatataatgagaatctaggcaaatcataggttt  
cacaacattaggatgttccattctacattgcacaagccattcagaagttattttgcaatataagagcttccgattcatcatcagccttcgacgat  
atgctttaattgcaaattttaattctttcattatcttccgggttttcaaggttacgcaacggataactgcagtagcaccacttccgatattttgtt  
tcatcaagtaaacatactttgagcttagacgaggaacgacgcttggcataaggtggcacatagtttgatcgtaaacttcttaggtacgtgttca  
atgctttcaggttttacgagcttataattgaccctgactgtttgtccatgccagttgattatcagaatctgacgagcagaccctgacttg  
taaccgggactaaagggttggcaggattaatacattcaaaaactgtcccttgtgtgtcatgttaaggctaccgtaacagcataagtaaaaca  
gtcgaactcgggagaatgaggccaagattcataagaagtattatcgtaaaggttctctgtcggggcatgagtgtttccaggacctggcgat  
gaccgttgaagtaacgggaggttagagaggggctttagaattagaacgaggagtgccgacaggggaggcattggaggttaggggaagcatgc  
agaggagtgtcaaaaaaacaccagcagagaggtatggcctggttctccatttccaggtatctacaggttccgaagggttggaaactc  
ggaggaatgagaatctgtttgatcttctcggagccaagtgagatctagacggttctgtgtaatggccgagctggcacgtttgggtacctc  
ttgaccagtcaaggagtgttttctgtttttgtttttgcacataatgatgagagctacttttgaataccttgggaaggttggggcgtcttc  
tgatcaggagaagaaggatgagaggaagggtttatgaagaatctgtgttaatgaaggagccaataccttccgaaggcttgcgatgatt  
tctcctagaaggatgaatagcctttcaataaagacttattccagtttgggttgcgagcttccagaagggttagcatgcacagggaccggtcc  
gacaggattctgtttgctgatgtatctaagggttgggtgggagagattcacgaggagtttggaacatgagccgtagagtcggtctgatg  
gttgtagcgagttcttgaggagttgcttcaaccgagcttgatccatttgaccagagttttccgacttaaattttttttttttttttttgagaatc  
cttttccgaaaggcgtaggtacaggggtgctagattgatttgcactgttcaaaaatggattcagatcggttaggttcaggaacgttccctggctacc  
caagccaccagacaaaaggttatctccagacattgataactaataatagaataaaaaaacagcagcaagtaataagcaagaatccaagga  
aaagacttgatagaaagtagattaacgcacgggttagcaggaagagctagaaaaaggtgcaatctgggaaatgctataaccgttctattat  
gaaatgggggttaaaatttcaaatgaaaaaaacaaaaggacaagctaaaatcaacaaggagctccgctcaaaaagaaatagaaaa  
cagagatgctttggactcgggaagagtaagtaattaacaggaaaaaataaaacaaacaaatgaaaacacaaaacagacaaggacaaga  
gacgtttgtagagattttcaagagaagacaacaaaaataaggagaaaaagaacaagaggaatagaaccgaaatctgactttggaaaaa  
agtagactggaagatagagtaaaataagaactttggaggttctgctgtagataagcaacatccaatgtactaattcctgaaagcttgagtaaag  
tttccaaataaaaaacagatgattgtttattcatgcaccaaagatgataaaaaagatgccgcaaatatacaatataatgtatgctgtttgat  
atataatacttttacaatagattgcttaagtcttgaaaaaacagcagacagaaagcaacacgaaaaagcacaggaaagcctaatacagcaa  
aaaggtagaagcgtgagaacgggagtgaaaaagaaaatcgtaaaagaagagcaaatcagcgtttcaatttccagaagccaacaat  
acggcaaaccttcaaagatctcagcaatttttggtcaataatcaacaataaggaaggaaaaactgacgacaaatgtttggtagtttaaaagt  
gacttctatgcaaacaccagataatagggttgcgcttcttgggtggaagcaaccaactaggaaagagtagcgttaagtaaggtacggttaagg  
aaaaggaaggtagaaaaacaggcaataaagaggaaatgaaggacagacagaaaagagaatacagaataaagttgaaaaacggaagttaaa

aaacagaaaatcgaaccgcgaaataaatatgcgaacgaacaatgacgttatgatataaacaagcaaaaaggctcattgctggaggtaaat  
cattaagcttgccaattgaatagtgaaaaataaattgaaagagatccacgaagtataagggaaaagcggtttgtaacaaggggtggctgaaaa  
agtaagatgtgcaaattgacgtagagtgatgagagtgagattctgggaaaaacgtaagaaaagcgagtgagcaacaagagagggaaaa  
ggaaacaaatagagaaggaaaggagtgaaacgaggaagcagactattgcactgtaaaaaattcgcaggaagtaaggggtatagagtgatt  
atTTTTGGAGGAGAAAGAGAAAAGAAGGAGAACGAAAAGAACGGTAGTTGGTGGATTGAGCTCTTTTTGTTCTGGAGAGAAAACGACTAG  
GAGTAACTAAGAGATAATCTGATAGCGATGAGCAATCCCCAAAACAACCCACAATCTGATGATAGGTAATTCAGGATGAAAGAGTAGA  
CAAAACCAATGATTCTTTGTTAGTTGATTGATGACTGGAATCGCTTCTCGTTTCAATGAATTGTTGTTACTGGGTGAAAACCATCTGTTCTG  
CTACAAGAGTATGTGACAGAGATGGCATCGTATTACTCCAGTATTGTAGGTAACCTCTTCTAAGGAAAATCCATTGGCTTATATATTTGTTGCT  
GTTTCATCGGGTAGTACAGTTCAATGAAAAAGGGAAAAGAAAAAAGAGACAGAGCGAACTACACAAGCGAAAAGGAATCGACGAATCTT  
AACTAAAACAAAATATGGTAATTTCTGAGATTGGGATTGGAAGTGTGGTTCGATTGGTTGCATGCTTTTCGCATACCTGAACGTTTTAGTCT  
GAAGAAACATTTGGAAGCACCTTTTATTCCATTTACAATTGGTAATTGGTGACAAATGTTATACTATCCTTATCGTTGTCATATCCAGTTTTCTA  
CCAATCGAGGGTTTGTACGATCCCGAAAGTATGTATCTTCTGACTCGAATTTCTGTTTCAACACTACTGTAGTAATTTGAAGAAAACTAA  
GGAGAAAGAGAAAAAGCGATCCAAGAAGCAGAGCCGATGTTGATTATTAGACAAAACCTTGATGGCATCAGCTAAACACTCAGGCAAA  
CACGTCTACTCATTGGTCTTTCTGATTAGATGCGATTCACTCAGTTTTATTTCTGAAGGCTTTTGTTCATCGTTCCGGCGAATCTTGTGAA  
GAATTGCCGTGCATACGTATAACAATGAAAATTTGCTTCTAGCCGGTTTTCTGCTTAAAGTCTTCTATTAAGTTATCTTCTAGCCCTTCTG  
AATGATCTTACAATCATTCTGCTAATGATAATACGACCAAGGAACCTACCACGAGTCTCCATACTTTTTCAAACATTTTCTTTCTTTCT  
ATTTCTATTATTTTATTTTATTTCTTCTATAGACCGTATGAGCAGTAGGAAAAAAAAGCCACTACATCAGCTGAATCCATACCCTGTTCC  
CAAGTCTATTCTATAGAACTGAAACCATCTCAATGTTTCGATTTTTCTCGGTAATTTATAATCTCATTTAACTTTTCTTTTGGATTACTC  
GTTTTCTAGACTTCTTATTTTGTACGCGATTCACTGGCTGTCTACATAAAGTGGTGTCTTCTCATCTATCATAATTGTATGTTATCTAGAA  
AATTTTTTTAGAAAATAATTAGGTACGTTTTGAATTTGATGGCCTGAAAACAAGCGATAGTAAAAGGATGTTTCATTGGATTCTTGCAGAGC  
CAAAAGTCTTCAAACATATAAGAAGCTTTTCTTTCTTCTTCTTCTGCGTCTGTCATAGGTCGTTCTGCGGTTGAGTATCAAATT  
TTGGTTTCCAAGGGGATACTGTGTCTGTTGCGAAATCTTTCAAGATTTATCTAACAATCATTAACTTAGGAAGTGTATGATTCTACG  
AAAAAGCAAAATCGCGACCTAAACCCCATGGACCGATCGGATTCTGTTAAACGTCGGGCTGCAAGATCAGCTGTTTTCTCGGGGACTGA  
TTGAAATCCAAGCTTTCAAAAAAAAGGATTAAGAACAAGAAGTATTGAAGCTCGACAATCCAAGCATTGGAAGAAGCACTATTTG  
GTCGGCACTGTACTCAAATGTGCCAGAATTTGAAGTGTCCGAAAGAAGCATTCAAAGTCCATCCATCATAAGAGATCCAGAAACACA  
ACAGCCTAATCCAATTTTACTGTCAAAGCATACCATCGACCTGCTGCTGGAAGGTCCTTTTACTTCCGACGTTGACCTCCAGCATTGTA  
AAAAACAACCTGAATACCTTTTCTGAGAAATATTGGGAAAACATCATCTCCTGAGGCTCACGCTTTGTGCTGATCGGACTCGCGTGTACGTC  
AGGATTTTTCTGTTCAATCTTCTTACCAGCAATCAATACATTGTATGAACTATTGCTCGATTTACATCGTTTCTGTTGATGAACTGAAGGATC  
AACCGCATTTAGTTGTAACAAGAAATTGAGCAATATCAAAGGTATGAACTATACCTTTTCTTACTTAACATAAACAATCAGTGTCTCTA  
TACCCTGGGCGATTGTATGATTCAATGGTTAAAAACCAGTTAGTCTGATGAAACCGAGTTTCGCGCTATATGGTTTTGTAAGCTTAGGTG  
ATCCAGCAATATCTATGGAGACGTTAACGTGGTCTGAGAGATTTAGAAAAGCCAATGTCGAAACGGGTTGACCTTCTTCTATGACAAA  
GAAATAACTACTGAGCAAAAATCAAAAATATTGATTTGCTTGTATCTTCTATAACTGAAGGTGCTCCGAATTTCTATACAAGTTTTCT  
AAAGTTACTAAAAGTTTTAAACTACCTTTTGTAGGCTTGATAATAGATTTGTTTCTTCTTACTATACGTACCGGTGCGTTGAAGGCAATGAAAA  
GTACATATTTTCTGATGATAATTTCTTTTACTGACCTCTCGCAATTTCTTCTGTTCTTATGATGAGGATCTCATAAAAATTTGAAGAGTCT  
GGTCTTCAAATGCGTTAAGGGCGAGCAACCGGTGCTGGTGGCTTTGAATAAAGAATATAACATGGTAAGTTGTCTTATGCTTTGTT  
AACCGCTGAATAGATCTTTACCAATGGACAATCAATTTCTATATATCGCTAATACCAACACCTCGCATACCAATTTCAAATATCATATGCGTT  
GCAACTGATAATGTAAGCTACAGAGGCGTCAATCAAAGAAATACAAAAGAAGTGTCTTTTAAACACGGGTCCAAGTTAGGAAGTTTTCTATT  
CAGGTCTCTTGTGTTGTTACGGTTTTAATCTGGGATTTAAATATTATTGAATTTAAACCACGCTTAAAGAACATCAATTAATGGGCATTG  
TAAGGCTAGCAACCAATAAAAAGTCTTCTATGAAGATGAAGTGAATCAAGTAATAATCAAAGGTAAGACAACATTATAAAGAGTG  
TCTAATGTTTTGACGTATCTTTTACTACTAAATTCATAATTTGAGAAATGAACTGCTCCACGCTAGTAGAAGCATCAAAGGTGATAAAGCCAT  
GCCTTCTCATAATTCGCGTTCAATTCGTTCAAAGTTTTCTCAACCTTTTCTGATTCTACTTTTTGTAACGCTCTCTCATACTGCCGTTTT  
GCAGCAATCTCAGGACGAACATGCAAAAAATAACTAGATCTGGACGTGGTAAACCACGATCAGGGCTCTTGACCATTCCAATTGAGTCCCTA  
AGAGAGTTAGTACAATGTTTTCCATAGGGCGTACAATTTGGTAGGGCAACATACTTTGGCTGCAGAGAAAGCAATTCAGAAAAGGCATACCGA  
TCTAAATGCAGTTGTTCTGATTGAATTTTATTGGATATCTTCAATAACTCCATCTGTTTGGGAGAAAAGTAAGTGAATGACTGTATCGCTA  
AGCTGACTAGTTTTCTTCAAATAGTCAATTTCTGCAATAGCAGTAGTTGATCTAATATTAGCAAAAACCTTCAATGTAATTAACCTTTA  
GAGAAATACCTGGAATTTATAGAGCTGGACCTTTGCTTTGCTGCAATCTCCAGTAATAATTGGCACTGAGTAGATTTCTGAGCGAT  
CTAACCTTCAATAACAATTAAGAGCCTTATTTGAATCTCATCAAAAAGTTAAGTTGTAATGTTAGTTATTTGAGACAGTCAGACCCGT  
AAGGACTATAATAAAAAAATAAAAAGAAGTGAAGAAAGCATTAGGAATAATAACAAGGGTCTGATGAACTAGATTTTAGATGA



gtttaaatagtatcgtaaaagggtcacatggtaataaataaatcagaggatctgggatttgacacttaaagggtacgggtgcttatagaatacca  
aaagttaaataataacgatttgattatatcatggatgaagcatatactttgcagaagggttattcatgataaatcgttctaggatactgatcttt  
atgacacccaaatctccacataattgggattatcttctatctttaaaagtcataatccataaaaaaacgtactactagttgttacgacaattgt  
caattcagatgctcaaacattcgatttcacaggttagtcaaaatgaagcaagactataattcaattaattcttactgcccacgaagcgtaaacgac  
gataatagtaagtaaccaatctccagtttctgtgcaattcgccatcgcaaggcttgataaacgcgctctcgaagatttctttaagtcaggaaatgc  
atcgtaaaaggatgcgcaaatgtgtccagccattggcgaacgtcgcgatctaaataaagttggacgactgacgttttccatgaagggtattcaaa  
cccagcttcttcagcatttctgatatgctatttcatagtttagtattgaaagaccagaaattaatgaacgaaaagtcataagaagtaaaagt  
tatacattaccttgctcagtgccaaaataccaagggtttgcttcatcgatctgttctttagggatgccgtggccaatagtagatagatactag  
taattacttctgaaacatttccaaatactaaaaacactctaattagtagtggagctgctgatcgaatcactcactccgatttctgcaacaaagc  
ggccactggacgaagaacacgagctattccctgaaacacagctacctctttggttgggattccgcaaaatccaatgtagagcggcgttactaaag  
acggcgtcaaaccttccgatggaaattcaattgacctgcaagattttctccaggaatcacatatgcttctaactcttttctttgaggattgaatc  
attgatgaactggaatcaatccaatgatgtgttactgtgatgccaatctcgagtttaagactccatcaccgcatccaagtcaaggacaaca  
tccgatgcagttaaagctagctttggacgatctccttagtgagtttaggaacaaaagcagcgttttttgtagccttcagctgacctaaaacca  
ttgttagaaactctgcccatttaattgctctgtttttacaaaagtctctccattgtaggcctatacttgaggatgaatgaagttacgttgagaa  
tatgtgctgtaatttttactgagttcctttatggttatcaaaaccgagtataagcatttaagatcatgaacgataaagaagtcataagaatcct  
taagaaaggcaagtcattagctgttagtattgaaaagcaaaagtaaaaaatggaaggtgaaaagagagaaacatgctaataataaaac  
aaacttaaaactttataaatattggtatttcttaagatggagacctggactgtgcttgcaattattgaaccgggcaaatgttgattggtgacct  
ttctcagtaaaactgctttcaatgctaaggcaccaaaaaatatccttttatattcacatagtgataaccatctatagttaccaatggcgctca  
cgcttctgcaaaagaggaataaacaacccaactaagttatgtttacatactgttactcaaaaagtaaccggttaaataaactcatctggtag  
tagcataagtcggtttaactgagtgctttttgaattatgaaattactttcttttaagtcattctcttatggagctattgttatcgaacttctgctc  
ataacccaaaatattactgtattggcgagtttaagatatagcattgctatcgacaagtaagcaaaagcactattccaaataaatgattctgta  
gtaaactttgagatattaagtaactaaaacatttttagttttaccattcgattgccatgtccacaatcattgagaggataacgttgatatatta  
aacaagtttaccagcgagatgttgataacgagagatgattcctttctccttattcagtgagctatcacagagttatgatccaatttaaaaca  
aaaaatccactagccaaacattctatggattcaagcatatctatgctggagtgtagtcaagcccaacaaaaaagtcattaaagaagaat  
aaatagatatgtgatcgttagaatccaagaaatctgttattatgagctagtaacaatagaacaattaatggttccaacagctttgctctgta  
atgattttagcctactaacaattgaagacatttctgaaatataattatgctgaatttattacaatacaagcaacattcattgaactgctt  
gcttctattcattatcacagtgctgttaaccttaagcgtatcttgacatatcataacaacattcatatcgtctagttcatcgtttaatggaagacca  
tttgaaaacaaacttgcatatgtgacgagcgggtttacaaaatccgtttaaaaataatcccagtttcataaatatctgctttctacgcaaaa  
attcctagatacttaattaaaacattttgaacaaattgtttcagcttatgttttaactcatgcttatgtggaggcggtagcaccgagtttaaggca  
ccaaggattgatttaaacagccggtttgccaagtaaccattgctgtgctgcacatagcatgtcagaagaaatagagcttgaagcaggcga  
tgctttccctctgtttctttccacctgctccggtgtctctgacaacagtcattgattgcaatagacgcaacagagagatcgggctcaatggcctc  
gaaatgcttttaacagagcaatgctgtttgcaagtaaaagggtctgtgctgtggttatagctggataacgatcttttaagaaggactcggtt  
tcaaatgtacattcgtgctgcatgataattttgtcaggctttttccatcgataacattattccatgcacgatagtttctaaaggcctttcataattc  
caacgctcggattattggagtcgggttctaatacatttccaggtcagtagcacaactactcctatgctttcttcaaagaaaaggtaagtgct  
tacggtaaatacttctcccagtagtctcgttcaaatattgtttacggatttctgtagattcacgatttacagagcatacggctctaatttacta  
atggaaggacgattatcgaattcacaagattcaggtcctgtcactctcatatctttcttaaaactcttcaactttttctaaaaattctac  
aatgcaagatgttgtagttggcaagttgacctcgcgctgattcctttgtatacaagattcatgctcagccaatttttaaaacaagaagca  
gaattttgcaactgatcagaacaaagacataaaagtaacattttatatacaagtgaaatggatcctataagtttcttttttttgac  
gcgatttaacttgagattcatagtgaaacgaattgacaaggcttcaaggacctgaaagaagccaaaatctctcaaagaatcgttgcttt  
tttattaagaggaaggaaaaatgatcagtgactcgcaagacatgtgcttcacgaatgcttatggacggttgacaccaacggacaagaagcagg  
gaagggaagcattttcttctgacttttctcagagaatttgggccacaagattgaaatctaataatggaagattatgcttgatgaattacctgc  
tcgttacgtcaaagaacatctatgtgctcctccgaagcgttcaattccacaagcgttcgattgttttacttactatggctcttctactttgtca  
gtttggcttctatgtttcatactttgttgataagttcgtcgtatgttattactaagctgtcgtttacccttaacgcttctacttcatatacaaaa  
aagcagcaaaaacagcataagcgtcattgtatacatatacactcaattataatgtttttctttgtttgctggattgtccttgtagcgtcgtga  
gtaactattgttacgatgattcatagctatttctaaaacgtcgacaaaaagctgctggcaagccaaaccactccagtggttagaccaccga  
aactggcaatagccgaatcgttcgcccgggttctcattacagacagatactgtccctgggttctgctccgcttctgtacattattatgccat  
accgcatccacagaccaggacaaccgactgaagaccaactgatgaagttcctcctccatacacagcggctatccgagagaatgt  
ttcggagacgtcgatcatacagagctcaagaggacaagaagaaccactagcagaataggcagaaagacctcggctctcctcctcaggt

ttatttccccagaggaaatggtttaaaccgcttcaacgatgaatcttctgaatctttacctttattcgattactggtacgggtattatgtacga  
agtctttacgttgttctatatgaactgttaatttttaatttttacaccagcaactctagctctacaactctcgattaatagatgaactcgagct  
agagttgtttgtcctttttatgacagagttacagacgattcttaatgatatgaatattttgctgggttttggttttaaagaatttataatgtatttt  
ttttccgcttttgatcaaaagacgttgatttttttttttttttttttttttttttttttttttttttttttttttttttttttttttttttttt  
atcataatttaattgaaatcggtatcgagtagctacaagtaaaagtaataaaagggttatcttcatttctattgtttttgctgattcacttaccggttatt  
cttgaatagtaacattttcacatatattttctaaactatagctctgtttttttctgaattataactgtaaaactcgcaaaaaacgtaaatctcgatgatgc  
gttaaagggaaatcacacgtctcaaaagtcttattgtcaacggagtaaaaggagaccatttcaaacggcttcctttgacttgaagtgttggcgt  
atgtataggctcgaccaacgggatgtgaaagcaaaattggccagctggagacattgaccatgtagccatgtaagcgacttaccattactaaaa  
gtaggattcgaagaagaggggtgtaaaaaagcagacgtgtgctggccaaagctcctaacgatgtatcttggttccgtattggttcgaaaaacat  
gcaagtccatctggatagaatcgaagtaaacgataataagagattaaatggacaggttgattccaactggatcactaacgcttggctgaaaa  
tatctgcataccgaaataacagccatcaaacggaatccgtggttttttaatacatctcctccagcttccgtgatatacagacgaaattctt  
ttctatgtcttctttgttctgctcactcggattgttgtaactgaaatacaaaaattggcgataaagtgaatcgactcggcacgccttggcaaac  
agtttacagctttgagctataagaggaagatacgaacgtcatttaggttttcaagcattgttctactataagaagcaaaacctctgctggaagt  
ttgggtatgagtgatgggtgtcacggagggttgagttaaatcttagagagttgatctgcttactgcttcttaacgattcttcttccggaagcttttct  
gtccccgtcgtctgctctttttgttttggaaacgcaaacgctctaactcgcagataaattacctccacatctctgtaactttatgagccaaacgat  
acctgtttaaagaggtaccaatatcaccttctttcagattcaacagcttcttataatgacttaaagcttcttgagaatccactgtcagggcaa  
acttcaaggctgttcaatagacgctttctgctcatttaatacaaaaataaagccctaaatatcaacaaaaaatcaagttactgttctcactatg  
tacaatcgatattatacaactcttaaacttaagcaatgctagaggattccatcccaaacagttatttagtgattttctatgtaagggttagttc  
atgttagaaaaattgcttgaatttcttcttaatgcaaaaaatcagatactgggtataatacaatgggaggggaatgcaagtgccgctcaagaa  
tgtgaatgcaaaagccataagctaacgaaatatacttaatgtatttttataaataatgttttactatttataaaaaaaaaggcttcgacctctgtaa  
gtgtcaaaagataaaattgacttcttcaaaaattgcttccaggaatgaaaccaagtagcgtcactgtaactcattaataagaagctgaatcactt  
gggttacttgaaaaatctagagaatattacggaccatgactgaaggctcgcacattttcagtttctgctctctcgagttaagccgtaaaaggcct  
tgcaatttgattaaaacttatatacaatcaaaagaaacatgtttcattgtgtgtaacttattattattgaaactgtatgagcatagatgaagcacta  
ttctcatgaaaaactttagctatataattcgttacatacacatgttaaggtttctgctgtatgtataaacctttagctcatagttgacatctt  
aacagatctatataaggagtatatgctataaaacttcaaaaaatacgaacaccacttataatgatatgctagaaccattcctttacctaggtaat  
atacaatctatataattatagaaactcgacgaatcaagccggtcgttaacattgaaaattgctttatactagaccaaacatatcttctgggct  
ggcgaatgtgacatttcaattcagatccagcagctaaagcttttagatctttcttttagcatgcttttcccttcgatcgttaacaaactcgaaaact  
catgtcttccatgacacatgttaggaaccgttggaaaccaacaattccttcaaggctaatggaatcatatttgaaaaagatcctacattttgc  
agcatcctgatctaacttctcctgtaattgaacgcattggcattctagctaaactccacataaactgaggattttagtaggaggagcatacataaca  
acagcctttactccagcagatacaaaacgacggaaatgatgagcagctcagtgataacatgatcttactcttgcctgataaaaataaagtacga  
gctctagtaagatcggatgtactagagtattcagaaatggcactgtaacttaccgcttctcatcatatgatttctgatttctcaaaaatcaagt  
aggaaggaacataactaaaatgccaccctggggactttgacgagctgaggcaagactgagttgacaaagtaggagaaacgagcatcaggca  
gctttataatagagtcactagatacacgaacataggtctgcttaattttgtaacctaattgattcaaaaactccaggtgtaaagtacgaaactgac  
tttctgcaacgttcaacatgtaatgagaaaaaacgagttgatccaaagcattgtattgagaaaaaaaagagtttgcgcatatattggc  
ctgttgatccagataccatggctgtacacggctgaaatcaaatcatgagcttctctgggcaagttattgatttcatcaaaaatacattctatgct  
cccaattttgatgtctaaagaatcggcttgatcaataatcgaaacctcaatagagctcaaaaaatccaaatctgtttcttatcacctttattcca  
attgccaatcgtaaacctaattggactagcaacaataatcagagttgtaaattgagaaaaacagtttgatagtttcttgtaaactgacgcca  
atacgaacatatcgtcagattacctgcaacaaataacggaatcttccgggttctttcagagataacttcttcaattgtgaaatcatctc  
aaagcgttacgattagccactgtacagctcctgagtaagatataagagtattataaactctaaacagctatttctttaggttaaagaaccaa  
tacctttggctcagtgatcctgatctcgaactctaaactcagggttttagatagctggcactgttcttaagatcggtccttctgttga  
atgattgagagcatgcaaaagcacaagaacaataagtttactcttaatgttcatgttggtgaaaaacacatcttggtaattaaacatgtg  
tttgcaatttccgttgcatagtatgtaaatgtccggatggtttatgcgacttataagctccaagattcgtgttttagacccaaatcagaaacgtt  
atcgtcttgggtatgcaataattgaaacttcttctatctggtgtaaaaaattgagaaatcccagtttggtttctcagacgactgagacaa  
cttcatggcctttatgcaagaaattgagtcattaatgacttctatcttgaatcaaaatgacgataaaaagggtcttgagatgattcatttct  
tttggctcatcaagtaaagagttcggattatccacaccctcacgaacaagagcatcaattttcttttcttattggtttcatttcttcttctgtt  
tctggctcatcaacttttcaatgactttgttcttttttctttatgctttggcaagctcgtcgccttcagaaaccttccgggttttctttcttttactatt  
catcaagtataaaagcttcatatgattttccagccaattcatctttgacatctcatcaatgttgccaaaacctgacattgtgatgattatgaa  
agtaaaatcccttcaattttttatctttttgaccacggttcaataaatgcaacgttgagtaattttataaagtatttttcatagagctccgaa

attacctttttaaaggtagttcatctataggtttgggtgaaattgagaaaggtagacgaaaagatcgtaaattaagggtctaatttattacgt  
tctttttatattttgagtaaaaaattagagagaaattggtaaaagactataattattaaaattaaatgtaactaaatgttacaagagactaaagt  
caccccaaggatactacttaagagacactctctgacagaccctacaattagaaggagagaaaaatgaacttttaacatcaaagctgtaaattca  
aaggcggaaaaaacccccaactacacaaaaaaacaacaaccgctggtaactgagctgctgtattaaacaaaaacgtgaatgagaggtaa  
agccaatagtaaggatattaagtgagacttaaggcactagaatgcataaggtttaataatccggcgccatataaaacgtaagcagattatggaat  
gtctcataaatgatagtagttagcatgaattcaacaatcgttatagttcagacaactgggaatagtaggacaggatttcatgaacagtaaagtt  
gcatgattacaggtcaaacccatactgccccacattccatattaacatatagtaataagtaagaaagataaaggtaaaggtaagtcttaacgt  
ctaatagattttttaaattgattaaggaaatggcgcagccatcaatcactagagaaggccaaagctttactgattgtgttaataagttacagtatcat  
cattttgactagatggattagacaaatcggcctccaaacgcaaatcatattggcctactgagcgacgttgcatccagcgatttagccgcca  
agctattttggtagttccagggccagggctaggcggtgcgcttgagccatgcaaggggtatattgcaattggaatcagtagtagcattgaaa  
ggaaagattttatgtctgctttaaatcacgactagtagataccagtggttacgaattgtgtcacgtagcatcttgatgatggcgaaagtccag  
ctcattcttttgaacagagacacattcaaacctttctatcaactcctcttgctaggttacgcataacatattgatcgaatcacgaataatcgtgt  
aattaaatcagaggtggaacaccctccgtacttttagtaggtatgaacttgcctacttttttaacgggaaggtagatatcaccactatcatcagat  
gcgtaaggaaatcatcatgagcgacaaagtcaatttcatgttcttcaaaaattctgggtgaaatcacccaaggagcgtttctacgacctcatcta  
cccattgcaatggcgaagtctcggctcgttcttctcattcataacgggttaaacccttttagtgcgatgagttagcatatcgttgggaagtccaaca  
atcaggtgaacgttgggaaaaactttttgcttgcctcaattgtctcatatggcgaatgtgaaataagtaacacacatctgcataaacacgca  
cgggtctatcattcggcggtcattgatgggataaataattgggaatattgttgggaattcactttagtaggggttcatcttcatcggtatcag  
aaactggagaagaacgaggtgttctctcattggactcttctcaaatcttgcattcatgattactttctgacttttcttctggtccacaggatc  
tattatggccttttagcatgttgcctcatcactcttctgaaaaattacattctcaataggtcgtttgacttctcgtctttttgtttctatt  
tctccataataataataataatagtaaaacacgaatgtaaaatcttactgaaggcgacctatattgtttcaacacctttcagaggtgattgtg  
gtgaggaagtctcctcagtgatgaaaaacgacgaaaaagggtctctacatatataaaaaaaatgtggattgaacacttataactatttca  
aattaatagtttagagaagaagtataaaaactgaagtgagacggtaaaaaaaacaaaattgatcattcttatatacacgaaatcacac  
ttattaaagtaaaagcattacatcttggccttgggggtgaaagaaaaaggcatcagcaacaaggcgttttgacttttcttctggtcagcttgggg  
atctgatctgtaaagtaaaacttttgggaacctaaattcagcgatctttgaaacaaaagttttagttccttgacggtaaccgactaccaga  
tgccgatggatggcgtttgaaatcttctcgtatctttcatcaggacagcaagcaaacggctcagcaacactaggatgctgcatcaagac  
agcatcaatctcagctggagaaacttttccctccacgattgacaagttcctaatacagcctgtaataaaacgaagccttctcatcaacttta  
ccttcatcaccagtagcgaagaagtttctcggtaaaagaagactgtttgcttctgggttgaaggatcccttagtcacatttgatccacggac  
acaaatctctccctcagatccctgaggaacttcttacccttaggatcagaaatcttttagttcaacccaaatggcacaccaacggacttgggtttg  
tggttaaggggaggaagtggattcgtggctatttgatgggaagcttccgtcatggcgtacgcctcaagaacgggcttgaaggcattctcaagt  
tttcgaaaaacaggaggggccaaggagaagagcatgaacgaataaagcgaatagtaggaagtggttgggaagaggagtgcaacaaaa  
tttggtagaattgttgtagcggcagtgatccatgttccccatattgacaaaactcttccagaatgtttgagcagaaaagcaggaggagcagcgg  
cagagccaccagatgcaagtgtagaagaagtcacacaggagaccatggacatggaagagaggcattaccacgtatgaagtatcacgtgaa  
gaaaggcgttaagaagcactgatgtttgaaatcctcggcagaggttctgattgggttaaaggaactcttgggacgtcctgtagtaccactagtg  
tgcaaaaacagtgatcgtcaggatgaggaagagcaaggggctgagggtgagaagacttagaccctcaacacgaacaatcttactaga  
cgggattcgggacaccaagcaaatctcgcactgtaaccgaaagcttttggctgcccgcacagcaggagattggctcagatagacccctgtg  
acaaaaacagcttctttaggtcgtcaatataaaactcaaatccgattgcttgaatttgagttaaagcgtccacagacagctcttggcagg  
aaacagcatagaagctgacgcaaatccaaaccattaggaactgcaatgtttacaggatcatttgccttaatacctaaactggctatttgccttg  
aagatccataatggcactcggagctactgtaagacaattctgccgaaaccgaggagcgaacaaagccctggcgtgagcatctccacgcaa  
agcctgtagagtgtagcggtagacatgacagaaacaatctaaattttatataataaacagaaacaagtcagttcagcggcaaccaacgaaag  
agagttgaataaaaaagtaggtataaagtaagaaggaaactgaaatgatactgtatgttgaagaggaaaaaccaagagagtatcgtttgac  
tatgaatccaaatctcgcgcaaaaataaagataaatttctcaatatactgtaaaagtattatagatgcttcttttgcacaaaaaaaccaacaacc  
acaaaaaatcgggtgttctttagatgcttcaagtcgcagagatgaggttagttagttgtagaaaatgaaatctctacgaataggctaaattg  
ttactcggtagcggcacacctttgattaccgtaaattgtgactctaatagaattctgcttcttcttagctaaagtttccataataagagaag  
atagtaagaaaaccagcaagcgagagcgaacaaattttatgaaatagacgttataaaaaagacctttactaatcttcttctgcttgt  
cctttataacctttattgagagaaaactggccttgcacaaaattattgacaggacagtttcttattgttggtagagaaatcaaatcag  
aaaggaattgttcttcaacaaggagtagtatattcatatatgaaggtaaaaaagattcatttgaatttacaagtcaacgattcaactcctt  
tactgaaaaaattcatgaaggttgggttattgtttataaaatataaaagaaccgaataattcacttattgtctgcaagggtgaaaag  
acattcgttctaaggctttagaagaaaactgaaactttcatattatcccatcatccgtctatacaaaacagagaagagtacgaatattcgg

atthccatgttttcttttaaaatgaatgtaagcaaacatcgatccttctggcagcattagagatcgatgactattgcagatcaaaaca  
aaatctcaaaaacacgaaaatcgaaaagaatcagtagtaacatacaaaaccaatthctataagttacatatagttcagaatgagagaccaa  
aagaaaaggaaagataaaacgtatcacaatatataaaatatatatataatthataactccaaacatgattgatacagtaaacatthtat  
ttcatcaaaaattggaaaaggcgatcaactthcatagccctcatataacgctthttattgtttcgttagaaaaggcagcagcagccggacataa  
agccatgatgcataatcatgataagttggaaagaagattgtttataggcaggattgttcttgaattcttctcgaaacatcaatgatgttggcatcc  
tcatcttagaagataagaaaaaactggtagcgaacattctggcatcagcagggtcaatgaatgctgctgacaacaagcaatattaacaa  
atcagaagtgtgaggataggttaactaaagcttagcaccagcagtagccaagtgtccaatttggacatcgttacatgggtgctcttgatag  
catccaaaactthtttagattgggcaaagatccgcagagagacagagttgaaaaaactcgtcaaaactthtttctcggaagtaatag  
gagggtaagattctacaggcaaaggagaactthgaaaaagttaggcaaataaacagtgaaagccagcctgggtagctgtcagcgaacttht  
gattgctcagaaagtcaaaaactcaaaaacggaaagaatgacctthttgtggaaatgctgccaacggcataggtgttaaacctcaaaat  
ttatthcttactthgaaaagtgtactthcgttaggagaacagcaccaatgttagtagggcagcaggaagccattgtacaatagtaaacgca  
tgattcaggaaatgtgctaaagacaattacgcttgacctaattcacatthattgattagtcataatagtaattattacaataactgattagca  
taattgaaaagatctgaaaaaggaaactthaaacgaagaaccatacaattgattthttatattatagtatattcaatcgtctgtctcataaa  
gatgcttggthtttttttttcaaagcctthacggtaaaaacgtatagcattgataaaacacggctgactacgttagtagtaagaataa  
tcaattgaaacaagacaatcgaaacagttatgaatctaatthttcgttttgcaatcggtcgattaggaagaatacatttcatttctaaagtgt  
catatccataactcactctgtcttctgactctactccgtatgctgttctatctgtaaggaggatttactggttaagaagatctttacagg  
ttctcatggaaagtataacttaagatagccaggaaaaaactgacagtgaatagaaaatggcagcactcatagggcgattctgatgctcctgc  
aaagataaataggaagagaaattggaaaaaccagttggcaaaattagaaataatgatgagaaatgttcgtttttttttttttttttttttg  
gtcacgcagtaagaagttaaaaagagtttagattcctattgctgttttttttttttttttttttttttttttttttttttttttttttttt  
aaaaccaagagaagaatcagaaaaagcaaaagtgtcaattctacatcttaactcaacataggttttaaacataatgagtacagaccataa  
tactaaacactthtaaaaatcaaatcaatctcgaatthaaaggcgtttacacaaactcgattcaaaaaccctthttatthtaaaaatctthtt  
tttcaaactccatgatgagctccatgatggaacaaaaagaactccaaggcgagactcgaactcgaaccttctgataaccttcttaagagttag  
acgcttaaacgattgagctaccgggacttgttataattaacactaaagtgttagatthttcttctttaggttatttttttttttttttttttttt  
gagagaaaatgtatgtaaagacaagatgtgaactthtaattgtcagcattcaaatgatagtaacatgtaacaaaagaaaggctgtcaactgtaa  
agctthttgtagccatagattgttttgaaggccatagtaagctcgcacaaacgatgctgttcttactgttcatgctgcaagatccatgggttt  
ttccaaggaggaatcaacaggacaccgagcttcataaatgcaataatgtatgtctttacaaaatcagtaagaataaacagatgaaagag  
taataggtcgatgattgtacttgaggacataactgtaagggtactatctaaaaagacagaaattagtcagttcgtttcattgtagcaaaactgt  
tgcaagaataactcctcaaagatacatgaattcccctgtttcatagcaaaaggaaacgaaatgagagtcctaaaccttaagcaaaagatgttt  
cctgatttcggaacccttattaattgtgggtccttgggtcgttaaagccaagagagggtccttggataagactatcaaatggtagtagagcaa  
gaaactgtttcgttatgtctgcaaacgaagggtccttcccttgcattgcaactaaagccatgggtgtctatagtaacgaattatgggat  
aggaagatcataagagtaattgaaagacagttttttttttttgatccaaccctcaagtcagaggaattaaattttacaaaagcacaagtgtga  
ctcgtcaatgacttctactgattgactcaatcaccttcagtaaaaaaactcaatctactgttagagacgtaattcaattgtttgtttcacgtcga  
ttatcattcttttttcccaagatthttccaatgtcttctatttccaatgcaatcaatgtactttcattttttttttttttttttttttataaaaaaga  
aaatgagaagtggccatgcactthtttaaggctattataaccaaatgtatacgttccgaactgttacgtttccaaaagcaaaactccacta  
gttgtgttagcggcctagctactaaattcgataaagtagtacatactataccttattatataataaaaaaagtagcttthtaaaactttataatg  
agtctaagtagcggagaaggtgtgttattgactgggtcctcaaaaggattgggtcgcgaactgctcaggctctcgaacaaaatcaaaagtagtt  
gctgttagtgaagttgacaaaagaattggaagcttcttctacaacatccagattcctcgttcatgtgcagggtgatgttacaagacagctc  
agtctagtgtgaaacggctattcaaaagttcgccgtcttgatgccattgtthaaacgggtctgttaatccatttcgaaaattgaaatgca  
gatgtaaatcaatggcgactthtttaggtcaatttcttagcgtagtcgagacgggtcaagcaagcgatccctcatctacgaaaacaaaaggt  
tctattgtcattgtatcttctggggccgtgttcgaccctaccagcttggacggcctactgcacctcaaaagctgctatcaacatgctgttacgagt  
cttggaaagttaggagccagatataatgagcgttctgttacccccgttgtttgactcccatgcaagaatcattcgtgacgagcaaaaacaa  
atcagccatgggagatgcatgattthtaagaactcaagcttccggcaagctgggtgtcccctcatgacgttgcaaaagcttactthttg  
gctatgaaaccaagtataagattactggtaattgtgtgagtggaagcttthttgaatgaatcgttcaaacagcttctattgacgattaagcta  
gattatgattthttatcttctcaggtaattgtgaatgaactgttctacttctgttcttctggcttcaaaaacactgatcccttacaacc  
ttaaaccaaaaaagcaaaacattacaagctthttacatggttcaaaagctactcattgtaaaaggttcaaaactttacattcaacttctcattccaaa  
aaatttcaagcaaaagtttaattcgttctcatttaaattacgttttcttattcttcaaaatthttctgttaacataatgacctgggaaaactaa  
cttgatataacgcttthttatagcaaacagtcattthttcaaacctcacgaaactagcaagcattgatthtttggaaattatcaagttattctct  
tttttttttttttttacttcaaaaaaccgatthttatcagattcaatacttaacagtgaaagaatgcaagacatccaaaagcttagtattttcac

ccttcagacgattactttcgtctatcgatctcaaacagatcttcatctaattgtgacacctgatgcaaatgaagaagcagaaaatgagaa  
agaatctcggattactgattctacccaaaaaatgtttgtcatgtaccatgtggaatcaatgatctaagtaatttagataatcgaagcaacat  
gtgagatcagattggcaccgctttaatgtgaaacgtacagggccggtcttcatctgtctcaagatgaatttgagcaatttttagacaatctaa  
ctgaatccatctcgggtcagaaagtgatgatagctcagacgaggaagaagtcaataaagcccagtgggaaaaggcatttcagaattctcttcg  
aatcaaagagaacctcagcaaaaaagaaatcaaggtcacaataaacccaattggttggttgaataaaaaatcaagaccaac  
aaaccgctgttccttggtattaccgacacttattccattagattccgccattacaaaagatcaacttttagcagtcctcaaacaggagaatcaaaag  
aaaccattcaagtagccatgttcatgcttggtggtggtcatttcgagcaatgatagctaccaacgagccttcagcgaactcctcagcttctta  
ttattccaaagtcttgcccaaaagactatccatcgatatacgacaagaaggaaacaaggtggatccaaggtgccgagataattcgaaagg  
tgggatacattcagctgtagtagccttcgctgatataacgaattagcattgattcgggatccaacaactattaaagagtggaatcttactt  
gacaagtgtgattgatattatccgagcaattggtgcatcaaatcgctccatattctttctcatacagatcctttagttgatcctaaagacaatag  
attaaggacattcctttactaccaagcgtgctacacattctgaattgcttcgatgttataaagagtaattactccaaaatcagtaatatcgaca  
ctcaagcactggaaactaccaacaggaacttaaaaaagagaatgaagcaaaaaaattgcagagcaagaactcgagaaaagcaggaaaa  
cgagaaaaggatattggcaaacatactgatgattgcttactagttgaaagcagataatctagaagaagtttaagatcttcgtgcaaatg  
gtctatctcaatttcagattcacctttgaatgttcatatccatacttctccctttacattatgctgttgcctcaaggaaacacaaagctagtagc  
gaaccttctcgtgagggggcagaccctactatacaaaatggaaacggtaaaactccatagaaattagctcgagcaatcgagaagtgcgagat  
gaattttcaatagctcgacatgagcttgccgaaaatgtgtacgactgggagatggcctaaagttggtacagcaaatgcagagaccaggtagaaa  
aactgagacaaaaagcgaagctcgtttgaaagccaaaaagaagagcgtgaacaacaagaggcacaacgctcaggaagccataaaaa  
aaattcaagaacaagagaagaagggtacgattccaatttggtaaaggacattccttggaattaatcaattacgcaagaagatgatctaaa  
gtctctaaatccagaaatcgccggaagaatcgagcgtgaaaaacgagcagcggcagctatgaagcgggtgcaaaaaataaagcaatggaa  
agatagattttacaatgaatgatgttttatgaaaagatactgttataattataatgatagaaagcaagataagagagaataaaagttcac  
atcttattatagggaggggagaaagcacaataaaatataaacctcaaaaaaacccgattacattaattacctaaccctgtttgtttgttttct  
tcttattagacttcttagaaggagcagccttttgacagcgtcagcttttagcctgtgttcatctgaatcgagagtaataccaagttgttcgagcttc  
gttctttaaactgtaacttcggttatgacgagagaccagcttcttaccctttaccgggttaaggtttctgatgctctaaactgcaatggtagc  
ggggaatacgtttgaaaggttggaagcacctttgaacatttctcgtgaattgatcagccggaatcatttgcaataatcgctccatataa  
gaggtagttatgatagctcggcaacaacgttgccacatcaagagactcaactcaatgaaagcatagtttgctattgccagcttattatgg  
ttagcaagtgcccaactttgttatcatataacgtaaacacgtaaacataccttttactacgagataaacggagacgtagaacggtaccaat  
gagagaaataacctttcagctgctttcgtggaatccatggggaagacgaccaacgtataaaacactggctgtttgttcaaaccttctctga  
aacctttttttatttttctcttttctctctaatgccataattggcctttgaaagcgcattcgaagtatctatttccacatcgcttctcctcgt  
cccagaagattcaaatccctcaaggtttctacgttctcttttctccatctacagattcctgctcaacactcctgagagaaggagttgtctcgt  
tctcagcattatccacttctgtcgtgaaggtgttttaactcctctgtgtcttattcatcaattgcgttaatatcgttaacgtgcaaaaac  
cttttcttactcttctgtagccctttaggctgctttgtttcgaatttcttctttaaaggtgtggttctaaactgaattttttagtaaggacatac  
cctcctcaataacggacttctttatcatagccaaattacgaagagtctcattaaagttactatgataactgggatacgtatatacacatcctt  
actcttgagaagcatacctaaataaaatgaaatcggtaggtttgcctttcaatttactcagtaatcgactgcttcttattaatttttaagactt  
ctattgaaagtatttatcattgctaactgatatctacataattcattcaacgctattttttataaaaactgaaaaacaagacgggaatcaaaa  
gaactaaagcagtgaaaacactcacacttttctaataaaaaaaggtaccaaaaagacaaagaataaataaacgaaagaatgaatgatctaa  
gaacaaaaggatgtaaatcattttacaaaagacccttctgacagctacttcggcattcaaaataaccagaccggcagcactaatacaggtt  
gtgaacaagagagacaaactgacgtcaaaaaatagaatcagaacggatgcgaccaacggagacagcgtatccttgctggtttcacgatctaaa  
cggggttgaggacgatcaggacaagatcacaagaacaatagcttgccttaggagcgtatggcagtcgaagctttgagcttcagacacat  
actcattaagaccttatggacatcagaacagaaggagtggcgttagcaaatggacagagatgcacatcaagtaccatctataacaggcac  
acggttacactgagcagagacaacagtgccgttaattcaaaaagcagagacgctttcattaacaccacctaataattttacgggttccattcaat  
cttgtcttctcaccactgatatagggaaacaacattatccaacatctcagaggctggaacaccgggtagccagcaccagaaatggcttgatac  
ttactaccgatccttatcaatggggccgaaagcatctgaagagccttaagaggcagcagcactgctgcagtggaacaattcgagttggtaatg  
atgcaaccatggtctaagttgtttcctgcgctgagatttaagaacatccaatgttcagtggtgacagtggaacgactaaaggaacattgga  
gttctacgatagttctggcattggaacgacagccagattgcatcacgaaattctttcaatttcaccagcaaaatcagagtcctaaaccactg  
aaaacaatgtcacattcagtgattcttaacttcgaggggttgacagtcagtcagcaaccatctgggcataggcgaggtttgctccattgggt  
tgctcttctgataattgccagcggagcagcagcagcaccacaggaactgcaatctgaaattagatgatcagcaaggagggttaaaaaatctt  
gaccaacgtacctataaacaattagcaattgaatcttctgacagttggtaaatcttttagcgaattctcttcaaaaatcaggttcagacaga  
aagcaagtataaattcctttcatctgtacaattatctttttgctctataggcgtgcttctgctgtaacaagcaattttatgcaatttatagc

gagaatgagaatcgcttgatcaaacagcagccaacctatcaatcataagcaattgaacttaccagtagcaccgagaactcctactttcttaa  
caaccattttctgtctgtaattttgatgagtatatgttctgagcaggtttcaagagctgagaaattttcaatatcgagatggaatcaaag  
atcaattacaatcgttacatcgcgtaagatatttagcgaatgcttaaacgaacgttagtaacaagacaatgtttattagatgaaaaata  
aataaacaactaaacgaaatgaaatgaaactgaaaagctttctattcaacgaggaaaaattgtagctttatagcgcacagtagaaa  
agaccatttctgactggcaattaccttttcatcgtcggcatagtaggtccatcgtaggcaaattttctgggtatgttttttagagaagatgcagg  
taggactctttgtatcatccttttaataaaactttataagtaagattcgaaccaagaatgatatctgttagaaacagttagcatggatgattac  
ttggaatcttcataagcgtgattgggtattccgttaataaaacaaagactaaagtacaatatcaaaggaagagaagatgtagtatttaattgtca  
agtctcatttccgctcgtggatcgaagactcgttatttccggtgtgatctaccgattgctcatccatggaatcgtcatcgtcaccgtcactagtctga  
gtttcccttcttctgattcctggctcgggaatctatccgagcggatattaatgaaatccaactttaactctcgagcagcacgcaggtttctataa  
aagaaagttagtagttgcataacgaagctattgacagtaacatacacgattataaatttctcgttctcaacacgcaaaacattccacatgcatcg  
tcgaaaaactcggcaagcgtgaagaaaaactgagacctgaagaatgctgaatatgattaggaagatagagtagaagatgaaatagtttcg  
aatcacgaagttgattatcatcgtctaaaacataaggccatataatttttaataaacgatcttacgaaatcccagcgtatgtttgctgataaaa  
agagaccaatccatggttataatccaagtgtatgaaaagagagaattaattgctggcaactactgtataacaaatttgatactttaaccagcattt  
cgtctccacaagctcaataacatttgtgtacaagctgtaaacatatacttgagagcgttgaccaatgaggaaactctgcaaggagctggcata  
tcttcgaaagcattgaaaggtacgtaaaattgcccgaatgcccgtaaaaacccaagaagaggggaatgtgatgaaatgcaagataaggttc  
attccagtgctttatataaacagaaaaaagagaaacgcatccatttgtataaatcagacttaccatttggctcagcaaaaaaaatcctgg  
aagtggaactagaaagcccagataacaagaccgaataaactgagtaagaaatattttctgtccgcaatacggaaacaaaccgaggaaaa  
atgcaaatcacgcctgccaccctaaataaagaccggaaaaataatcgtaaatcctggaaaaaaatctcgatgcaaaagcaaaaagaaaag  
tgataaataaaaaacaggagcgtgaaatctccatagctgcctccaattaaagtttctctgattaaatcgaaaattaggatatagttaact  
ctggttttctccaataataacaatctaatgaaaacaaacaaacttaagataagtaataaaaaatccaccataatgaaagatactgatg  
ctgttcatcaccttgaataacaaactgcttctatagctaaaggaatcctgctcctaaaggattccgaatcgatcgtatgaaatgagtaact  
gaaaaagtttagtatacatgctgaattatattagattccacgcctatgctgactctgttttgacgtaagatcttagtttcaacagcaatcttt  
ctgtctcctttgagaaaagattggcatatgtgtcttcaatcttacttgcattgctcggttacagaggtattgaaaaagaaaaattggaaggt  
atctcatcattctgtttgaaatctgtatgaaaaatcttatacactttttcaatctttcgaaaagcttgttattcaagctttgtaactgtataatc  
agtttaataatcgtaaaaaatccagaagctacagtgtagaaaatctgctttttattataaaaaagcttaccatttttagtttagccttcaat  
ttacgatagctcacaccaggagtatatgcatctgtcggactcccttcgagcaggaatatgaaagactggctgaaatctagagaatctccgaag  
aggttccaataactgccgaagacttgactgatatttctgtactattacatttgttctcattctcgttttcttcttctgtgttttttagctttt  
ggtaaataggtttagctgtaaatcagggtcagcgttctcagcctcatttgcaggattcgtagaaactttgaaatctgctaaactgttgatca  
agaaatcttgaaaaatgggatgaaactaaagtcagccgctaagcatgattagaatggactcgtgtataagcaaaatagtggttctaccaag  
cctgcaaatccattagcaacaagaaagtataaaatctataaaactaccttggattgtctttcataaaaatcgggtctatctgcagatag  
accactcggcttgaggcaatccttaccggggttttcagaatcgaccgattatctttttctttttataatcaaaaatagtagtcccattct  
tagttgttagtttgaattgaaccatcattgccaataagcatttaccttactaattcgttttcaataaccctgttgttgaatagctgttcatat  
gaattcagttatttactttccaaatcttactaagatttcaacgacattggacatatgagtaaaggaggaaagagacctgtcctttctcagc  
caaaattaacttctaacggtgaatgatagctttttagcttgataaacgttttaaaaggagaaaaatgaagcttaaaacctgaatgaagaat  
aataactttctatagagcttgacagtagtaagccaaaggtcataagagggtaaacttgaaaaacacatattcaagttatataagctatata  
ataatattgaagtaaatgaaatggaagagattctgtgctcaatattgtctaaaatcaccatttatgtgtattctcaagggaattcgtcaactga  
atcgattactgtgaaattgaaaagacctaaaggaaagaagaagaaagaaatgggttgaaaagatatctcctgtcccactatgaaaaatgaa  
aactctgcagaatgtaacaatctatgggagcctttctatcaaaagaatgggtcattgaaaatagatggagcaacagttaaagcaagcat  
accatggtgagtagaagcgcacataggtttatgaataattgttactggagcttcatatgctggattcatgatagtaagctatggctcaatgtcac  
caaagtaggacctccatgggtctcaaaagaagctatgctctgacttgacgaaggagtgattcttccgacttcttttaccattatcaaacgtg  
aatgagccatcgttactgtaataatttccagggtcattcaattgatgcaaggaagtcaaacctagcaagactcaaggaagtacc  
agtaagacctttttcaagcagaataaagatcattcagtatctccacaagaaaagcctctctagtaatcattttgtagtcgacatttgcattatcat  
gggactcacgaaaacatcctttttataaaaaaattttgaaaatagttattttgtagaagagcaaggcttgggtcctcctaagcttgc  
gcttaagcaatgaatttctcctccacgaaccacgaactggctggtagaaaagaaagcccgttgtgtcaggttttacgatgaatccatcccggg  
atccttcttactcctaagacgctcttccagcaggcttattacctccggctataagtttcgagtggaaggttcgatgttactatagtagcgtac  
atcgtgaaggaattgcttattcaatcgggattttgcttcaacctatgattaggtggcttctctatgtttatctgtaaaaaatgtagcgc  
ctggtgaaggtactttggaagctgtgctaaaacgcatatttctacggatgcttcttcttttaaggctgtttatgaagaagcaatacaatggtaat  
atcattataagcagtaaatgaaaactaatccctcctgactagaaactggtttcgaatcataaacgatcgttttctactacgggtcgaatttttct

ccgtcggaaagagccagtgatgagtccttgtattattagagtactgctctggaggaggcttaattgacttcatgaatagtaggctgcaaattcgatt  
gactgagtcagaaatattgaaaattgcttctcatgtaccgaagctgtggctcaatgcattatcttctcctcattaatacacagagatctaaaa  
atcgaaaatgtttgctagcagctccaaactctataaactttgcgattttggtagtgcttgcattccgatttcgagccctaaacagctactgaaat  
tcggcaagtcgagtataatgttgagaaatatacaacctggcaatatcgatgctgaaatgcttgattgctgagggatttggaaatgatgaaaa  
aagtggtaagtacaaactttgaaattatattgcaagattatctaatgctttttatagatatatgggctttaggatttttttcaaaattgtgctatta  
tacgactcctttcgaacagcaagtccttctgctattttaaacgtgaactacatgtccctcctttgccttctattctactcgttaaaacgtttaata  
tctgctttactccaacaaaatccatggcagcggcacaacatatcaaacattggctgagatttgcattatgcaaaaatgcccattccaataagg  
gatatttatagtggtaaaaattcgtcaagttgtaaccttctggttctgaatatctgcaaatgacttcaaatctggaaaatggaggactgcaccccta  
gagagtcgagtggttcaatacacacaagattaccgctatggcccctcacggccttccaatgctgcacctgtccaataccttctaactcagaac  
taaactcaggaagccacccttctcatttgcaaaaccaatacaggtaggggcatcactcccaaatgttccacctaaaccatttcaaccgctcttg  
gtaaaaacgtttcatctatcttctgacagaaatcttacttatcacctacaacgcgcaggaacttacggatgttaaagtgccaatcctcctaa  
agcagctttggatatagcagataatgtgttttctccacgtcccgtaacctacggaaaagaaagaaaagaaaggatagagtgaaacaatg  
ttgaaaaatcaattgataccagaagcttctgggttggtatcttcttaccgggttcaaatatagctagatctgagctccaccaaggtaaact  
acttatcagcaaatggaacaatgtttcacgtccacagctattaccaacttacaaggtcggcgatccgtcccacaagttcctcgtaaacctggttt  
ttatgcggaagtagtggtctcaatgagtagtaccgactctcaatcttctgtgacagtaaacctacttattgagcctaaaggacataaaaaata  
tctttcgaacctaaaacgcaattgcaaaaaggaatattagtgataagggttagaaaagtcggacgaaaagtttgcgtctaccagaaacgaag  
aggagactgatcctcattcgtatgatcacagaaagaatgaatcaattattagcaggtaaagagatcaaaaaggcatctgatgacggatatag  
aaaatacaggatcctaataaaactactaaataatgattttgtcacgatttggttactgaaaaggatacaaaaagtaaaaatgttatctttat  
atgaataaaattcacgttctttattttaatttacacacatcatctattagcatatagattgttattgtttccatcaatgtttatttttggttatag  
taaaaatctgcaaacaggcaaataggacttataatagcctaaaaccagtaaatataatgaagattctaaagaaattgcctctatgctttaca  
ataaaagcagtcagtgatctgagcaggaagcaacagtgaaactgttcttgggaagttcaaaaatctctctgggactactgaaaccga  
aacagttacagacgggtttataatggtgaaaaggatacaggcttcgaaaaacaagcgttttctcaacaatagaatggagagatccgtttt  
atactggccaaagagaaaaaacactattccaataactaagagtccaattaggaagtcaaaacctcaacttttagacttatcgagaaatccatt  
gtagacacggaaaatttaaaactcgcaattaccttacctgaaggacctttgcacgcccgcagtttataaaggacacgtttgggtatcttatgaa  
ccgcttcgcaatcaagatgattctatctgcctaacacaactctatgttgatttttgggtacataaaacttaaatctgcaatagaccatctttct  
gtgtccgaaaagtagtctctttagcatgattacctgcaactccaacaaacctagggtcatttctcaaatgaattcggattcttctggaaggagc  
cttgtaaattcagcttcttttgcgtttgttctttagatttgggacctggatcgttcagaacgcaaaaattacaattttctattcctttctgct  
aagcaagcttatcaaaattgatactaacaggagcagaactttatcttctcttctcagcgaagctcaatttactagaacatccattgaa  
aaaacaactcctcatgaacgaaaatgttgcctcaatcaataataatcgtttgtgaaaacacagttttatcaaaaaactcgacaccct  
aaaattcactcagaatcaatatccagatcattgttttttagtgggcaagacgttgggctaaatatacagataatagcaaatcgcaatccatcg  
tatgctattctgtctttttatcctttatactaacctcaggtccggtatattaacgtttgttctgtagtctattcaagttgaaaaccgactca  
agccaataccacgcttcacaagcagcaccaaaaagaagacaggaaaggttgttcaaaagtgaaagtaaatcctcaagatactggatcat  
atttaccctcaattgggaaaaatatacattttcctaaattaccagggtcctgtagaacctagaacaaaacgccaggtccggatattcacaca  
ataaaggtttctttaaaccggttttacattcaaaagtaagttcaaaaactagtccttgatattgcaagctaaacaacgtaagattgacagaggct  
atctccaataactatattacatgcgcataaatgatatgaatatgaaagcaaatcataataaaatttacttaaggaatcgtttaaagcaatcatt  
gaacctacttggcttgattaggctgcaaatcaaaaggaatcaaatcaggaagaagagttagagaagactttactgaagccattcctacaggca  
tattgtacttcaagtttaaaaacaaaaatgaaagaagtcctatgcaagcataataatagaaaataaaccaactgcagagattatag  
aatgaaataaaataaagatacttgaatagaagataaaagtaaaaatgtaaccacaaaaaaaaggaaataacgaaaagacacacatatta  
aaaataagataagtcaaagataataaaatagataataacttaataaaagccctgagttgacagatatgaatacatcttaagactttcgtctgct  
aaaaagtctacgaaacaagttcattttttgggttttgattgttcttggcgtcaagggaagagatgttgtgactgggtatgtgctggataagggc  
gggtattcaaacaccattccgtcttcttgggtggaggaggccttgtttgatgagggttttttcatgacttctgattgggaaatactatcatca  
ctgtcactcgtttgattgaaatagggttcagagctcggggagatgttataggagatttcttaactccagagcagaccttgaacggtaattac  
tgggcaaggtagaggaaacgagaaaggttgcctgaacggcctaagtttaagttttgcattaaagagttcttctgcaagacctgcctttcatgg  
cctgtatcttcttattcgagctatagcacttttagaagcaagggccttcaatcgggtcgaatctgtaagccaggggctcagaggtaccag  
cggaatcggatcatcttctgataagacatagtgctgaaaggagactgaaggatttttctgacggagggtatcatggatggcctttctactaa  
aatcctttggagcagaaggatcattaaaattagaaccactttgggaatggaattggcgacgctatcttccgaaaagcagccactggagctttt  
tcacattacgattcggtgaggtcggcaagcatcaaaggaccgtcatgatgaaacttctgagccatataattccgttacatctaaacgatcaa  
tctggtctaacggctcctctgtaaagttttgttctggttgccttcacgaaccgttttatgtcgacgaatttacccttggcgcgggaattaccagattg

aatggatggagaataactcattggaaggagaccggtagtggccactggaggatcctacatgagtgtctacgagcacgcgacaatcggtagcgaagg  
aggtagcgtcagcactcatggaagaggaggagtcgagtagtgcctatagatgaatgaggacggaaatctaatagatcatggctgtctttacggggc  
tagaagatggttagaattggtgaacgcacgggtttctttgcaaactactgaactgcaacaagtagttagtatacatcatgtaaacacaagatg  
agagaagcttgagttttgatataaaactgatgcctactggctacatcgagttataatattcctgtttgtttcattcaacagttttaccatcatg  
tttaccacactcaattcctcttctattcaagacttaccaaatcatctgccaagactccatataaggatcgttcgtgcgaaccaaatttgagac  
aaaaacggattctgtgttaggtctccatgtttgatggatcaacaggcgactctgtgtggacgattgaccaaatttgattcctgagaatg  
gattctcagtcgcatcatcccgtctctccagaaaaataaattacgagttaaaagattgccaacttatgaaatgagcgtttaactgtgctatt  
attgtaattcccctgattctaggatatagttctgtgactaacaatagtgggaggtagactccgttttaccattttcgttattgtatgtaagtg  
gaataacgagtttcaaagatcgcataaattgttctttataatagtgctgggtgggagtcagagcaattggtagagtagcttggatcgtca  
ttaacaaaagaggtgatacagctatgttagtaattccaatagccttcaggtttattcatgaatgagaaaagaagctaaaggattctaatctata  
tttccggctagatgtgtaacaactatgaatacagaagtctttataaacatgccatgttttagcatcggagaacagttgaagtaatgcaaag  
gaacattgacataatcagtaacagtcgtctgtgaaatataatcattattcatcgtaaattttagttttcattatagaatgacaaacaactcta  
cttaagagcatcgtattccaagtgaagaaggtacaagaaatgtgatgcagcctcatcgtttgcaatcctgtgaaatccagcattcaaagttgc  
gtatcttttagtataaaatgtagagaacaccaatcagcgaagcccaattattatagaacccaaaatgaaacgtttccgagcaatcgatgctgc  
gaataactctgtcgttgatcaacatgtaaggaattgagtcattgaaaaataagccataacctgaaattttctgtgatcctcattact  
agctcatgcaaaaagaggagaccaaaggttagcgttagtgacgtaaattggaaaattattataaaaggacagtaaacgtgtcgaagca  
aaaaatagtgagctggcttattccatgttctagcaaatgatccaagtccaacagttccaccaatcgtcgtaaaaattcctgtcagcgaacgag  
tgatttcagcactgaagttacagatgccttcaaaaaatacccaaaatactataaggagctcagcatgaaaggaaacattagataggtgacagt  
cttgccaattgaagcacaagtagtaggtagatgcgtcttctggagcttcaaaatccattttatagcctgaagtaagactggaatcatgtagttt  
tccgatagactactaataagaaatgcaaccgaaagtccgagtgacattcaagtaaatatgtaactcgaatgagggcgcttctaggataata  
gagctgataacataagataggcataaataaaaacgttagtgactgtaaatgtaagttattcggatagcgtttccatgctcaactatcagactc  
tcacacagctcaagtttctttctggttccgaaagagaatctgacttagctcgaagtcgtcgggcttgataatagcaatacgaacaaaccgct  
ttaccgtgttgatgaatgaaattttcattaaaatgtccatagaatgtaggataaaagacagcagatgagtcaggccagtcacttaagcagcatc  
gcaatacactatgcatgagaatgcaaaaaccaaagcactgtaaaagaaaaatacccgaaccataccagcgtagagtacctaagaacaaacagtt  
tctggaatggaatgaaacaaaaaacaagaagacataaataagtctgctttgccagatccaataaattcatcttaagaattggatgatattg  
tttccaaagagcttaccgtttttccatattgtccaagaatgtataaaatcattgtgccaacagataccagaaaagaacaaagaatcctgta  
aagtctacattactcgtgatgcgtgcgggcaaaaatggaaggagtaggactgtagtctaaagggcggttaagctaccttgagtgatgctggtc  
tatatttttagtctcagatacccgaagtccttatcaagtattcaggaagactcgttctcgtggagttgaagcaatcatgatgaagaatcag  
cgaatagtgaaaagtataagttgaaagcagataaaacaaaaaaaatcaataattctaaagttagaatggatattgatgcaaatataat  
acgtgagcccaatattaataactaatgctgacgttattgtagaacacttgacttcgaaaattttccgtccaaagcgacacctagacagtcga  
agatacagttgcttactagcttcttagaataagcgaattttctagagaaaaactgagtaatgaaaacacgggttagacaagtcaattggat  
ctcgaagagtaatgtagtctatcgcgaagaaaaactattttagagacccttttagcataaaaagaaaaatcgaataagcaaaaaattatta  
ggaggtgttattgagagatggtgtgcacaagtgcttctgtaataattataacatcgtatgacattttcaacgaagccctacaaaaggcaga  
aatgtcttaacacagcgtcgtaaagaaagaaaaatcgaatacttacaattgtcaatacttttctcctaaactgacgaaaatactttgttacct  
aatagttactttacatcgttgcaatgaaatgacgaaaaacttttaaacattaaaagcaggaatttggtaggagagtaatacacaatgattt  
aaaatggtaagtattctcgtcaaggtgaaatcttaggaaacaactgcagaaactcggctactaacatagtagcattgtaagatgcaggattcta  
gctataattttacgttacattaattgatgctataaacgggcatggtgtagatggttatcagcttcttagcatggaagaggtcccagattcgag  
ttctggctgtccaatttttctaaaaatacaaaattatgtaagttataattactctttttgttgataccaacaaaataagtaaaggaattaata  
aaaaatactttaagtagtcaattcactatacatgataaacaatcgactttagaatttccttcatacaaaatagcaagtgcaatcaatacaggag  
gatagagacaaaaatagatattgctgttcttgaggatccacttgctaactcaaaagtagatgtttgtaaacgggccccttgtttatggtcgtt  
ttcattttagattcttaaaccttacaacaattgatgaaaagaacaagtataagaaattttagtaatacatacgaatgaatgattttcataa  
atatgattaacgtttatctgaaaacactaacaataagttataaattctattgactgttaagatgaaatcaataataaagtaagcgaat  
aaataactgtattgacaaaataattgttccaacaatgatataatgtttgaaaagtcgttaactccacgaattcccatgatattcttctgtaata  
aactcgataatgtctgaattgatggttcagctcactgaacaattacatataagactagtcctttcgtttgtttgtatccttataaaaatttac  
atcattctgagattatgtaaacaccttaataagaatattagccgtaactgaaaagtatataaaaaaaaagaaataaataaaagattaaa  
aaataaaagagcaacaaaaaggaaagcctacagcaccggattcccatgtgtctccaacatagtaactacgaggccctcagacgcttaact  
gcagtgcggacgggaactggtgtttcgcctaggtatggcgtagacaattgtaatgatcagatgcatatacatagcagttttttatgggtac  
ttgttaatgtttccaacccttagtaaatgtgttttcggatttataaacaatgcaatttgataaataaataagacaaaaaactatgatagttgtg



aacacactaggatttgaggatattaataaacaatatctatttaactgaaacgatttaatatagctgctgcaacgggtcatggacataagca  
taactatcaacgcttgagattttctgtaccctccaaaaagattaccaaaaaaaagcaaaagaacgtgaaacatggactaacacatgattttatt  
taattatcgggatcattagcttagtaagactaaaagctctctcgatagaaagacctgtcaaatttgattcctcattgccccatatcatcattac  
caattttcaaagggtcaaagtggtttcatttggtttaggtaagacatcatgtttgttcaaaacaaggaagaaaaaattggaggacaacaagg  
ccaggtaagtattgatcttgattttatttctccttctgtgtttacgggggacaaattctcacattagtcgaagaaattggaagaacactgg  
ggttagtgggacaccattgatgtcaaagagtttacgatttgcattttgctttctgttttcggacttgatattgcctaataaagcgaatgagcgttac  
taataaaatgcctgcctgctatcttcttagtcatgtattaactctttattgataacccttctttaggaattatataaagagccattaccaga  
acggctcatcactaacaacaaaaaacattatgcgtgtatttgttactggagcaacagggtttattggctctgaaattgtgagacagcttatcgc  
agctggacatgaagtggtcggttagtgcgttctgaagaaagcgtgcaaaactcaaaactgctggaggacatacctcatcttggtacactggagg  
atctggatagctgaagagtgagcagcattctgacggcgttatccatacagcttttggctgacttaacaagatcaagaggctgagat  
tgatgttctgctgattgaaacgattggtgaagccctcaaaggatctgatcgtctttctgttaccacttctggaactgctggtggtcccttactggta  
cggtaggcacagaggaacccaattagtcgaatcgcaattccacgttacttggggagatagcaacttgaattgcttcaaggagtgcgtt  
cctcagttgccctccaccaagtggtcatgggaccggagattatcagttcgtgcaaaagcttattgatacagctaaaagtaaagggtctctgc  
ttatattggcgaagggtgtaatcgcgtggcctgccgttcacagaaaagatgctgcaatctattcatattggcacttgaacaaggaactcctggaga  
catcttccatggtgttccgatgaaggtattccgaccaaagatattgcaaccgtgattggcaaacgactcaattacctattgtctcaaaccctct  
gaagaagcaaccgacctttggattccttggcacattcttttgggataaccaactcaagtaacttgaacagcaactttaggctggaagc  
cttccatcccacactttggctgatctggacagtgaggcgtactttaaagaactagaacagaatcgctgcttagtaataatgatattggcatca  
actcaggatcgacagtcaaagatattgggtagaagcagcacataattccaagccgtcgtcactgctaatgagaccatcctaagcaagtttg  
ccttgattattgattcgtgattccgaaaggtaaaaattgttccaaggtatctaatcagcaacgggaataggatcaattagtgatataatgaatattct  
gatgctgatatataatccaattatgagtggttctgtatgtagaaacaaaaaaaccaaaccagatagtaacgtacattctcaaatcacac  
agctgatctatttaatacaactttacgaaggaatgttctgctgagatttactaacgaactgttacggatcattagtaaacattctttgaaaa  
cgacaaatcgaaagcagtggtgtgtacgtataccgcagtttcttaagcaaaaatattcctcaaatctattgctgtaataaaaaggattgctcgg  
ccgggaatcgaaaccgggtccttcgatggcaacgaagcattatacactaaaccaccaaagcagcatgacataaacagggtctatgacattaa  
taaaagtaactttggactaaaatgaataagtaatgtagaagatatttacttcaatagacagacgctgtaaaggatgtaacgtaggcaaatgga  
ccgatattttaccgaggatcgcttagtggaacaaacaaatgaacataaaatatttatatcggaataatctggtcaataagataccggt  
taccgttcagagcattgactagaataaaggcatagaatcggattggtttgatgaatcaataatcgctgaaggctggacttgggttctcaaacg  
tcaagtaactgtggagaaagggtctctaaagttcggtaaaagcaagcttaaataggcgtataaaaaacaatggaataaagtataaagtacagt  
aaatgtagttgaaatgagtagaagtcattttgatgatcatcgtcgacaaaagatggaattcataaaatccaaggaaggggaaaaatgaatt  
tcaaatgccatagactagaatagcaccagaaagagttgtataaggcatagcttggcaggctagcctgcaaaaagtttcaataaaatgatgaat  
ttactcgcattagtgcaatgctgaaacacaatgtctaagacacatgacagtacaatatttatatacgatatacatataaaacatatcact  
atataaatagcacacttcttaattcattaattacacattgtcaatacggcaggatagccactatacttctgtaaaagtcctgctgacttactaca  
ttctggtcctgtaaacccaattttctcaagcaaaacacatctgcaaaaagaagggtaaagaggatgtaaggggctgtttcttataaatttac  
caagttattataaaggaaaagaaaaatgtctcttaaaagtgcaaaaccgcaacaatgtacgcgtctacacagatcaggcgaaggcataacac  
aaaaactgcctgagtgatcagcaagaaaaaattgaaaaaggactatgctttgtcacatcgaattgagcttctcaagagtttgattatccagaa  
gtagcaaccgcatcaaagttacagagatggtaaatagccatgtccacaggcgttacaagcctcatatcaaagtttctgattttgctgaaatg  
tcttaaaatgtgaacgtcacacggatagcaaaaatgtcaattgaaatattcagacgactggacgaagagtgccattacaagcagaccgt  
acgggtgatttccatagtcagggtggtatacattattcaacaaggattcccaaatatggaagagatttgaagatcatttcttagctgtgatctta  
tttgctgctgctggagatgaagttttctgttgaattggaacaaggccgattcttgaaccattcaagattgaaagtgctactagcgaagaccct  
acttctggtgtaagtgttggatattaatcccatgcatcaattattggcatttggtagcgggtactgtcgaatttgggaccctcgcgatcg  
ttcgcgtgtcggcattttggagatgcccttaatgtctcttctccatacacaagtgcaaacctgcaagcactgctttaaagttatcgtaatgatgg  
actcaatcttgcgaggttctgtgatggtattactctgttattgcttcaaaaaccgtatattgactaaagatcaaggttacagcttgc  
ctgtcaagaaccttagttggctggacagtccttgatgtagcggcgtcttctgagattctaaatcatcaagatctgggagaaagata  
cgggaaaaccgttacagctattgaacctactgtgattaaatgatgatgtccagttcctaactctggcttaattttaccgcaaatgaaggatct  
cctatgcatgctttatgttctctgcttaatccgctcctcgtggttcttcttataacattacagaagaaatggaagaaaccgtactccc  
acaatctatgacaactacaaatgttaccaaaaaggaacttctcagcttggctggtatcttctggaacgggtgttatccgtgcttatatgca  
tggtttttcattgactcacgctgtgatgaaaaggctcgtttgattgcaaatcccttcttcaagaagcatagaagaaagccattaaagaact  
cttgagaagaaactgtagcagtaagattcgtaccagaatcggcccaaggttaatgctacctggcaactcgtcttctaccaagaagccaagct  
acgcaagaagactggagacgaaaatgcttccagatttctgaagacgaccgttcaagaatgcttctactgataaggacttgaagttatgagg

atacaatagaatttaacaacttaatccaaccaatcaactaaactcaactcactgctgctgaagaatcggatgaagaacgcgagcacacaag  
agggtgcaattgagttctgatgaagaagtgcgctgatgaagaagtggagagcatgaaactttgataatctattgaataggagacaaaccg  
agcataatgataagaacaaaagggaactgaacaaactattcgagtagccttccggaatggaaatgacatttcaagtcgaaaagaaaaag  
aagaacaagccaagctcaagatgaagaacgtccagcgggaaaaagaagcaactactgaaggctgctgttctgtagcaaaaaatgtttc  
cgaaaattgtaacaaaaatgggtttatgttgtaataactaagcttctacaggttttttggttcaataataaaatggttatttgggataatcg  
gttttcatatgcagttatcaagtgtatgaacaaatataatagattcattagagaataatatttattcatgctttcaaaagttggctgaacgcag  
attatattttattttaataactaacagtcgcttaatacaagtttaaaagaagcgtcgagtgctctatgagaaagtcgcttgatgagtagttgat  
aatactgattacattttattgttttaactaaatgcgtgagtcactttgaaatcatagtagcttgattaataagtagtcttgccatttcaccttgaat  
cgcatactcttagaaaataaccaaccaacgactcaattttgatactacgcactattatccttaaaaaaacgaaaaaggcgatttagagttgtg  
tttatatagatcatttaaaatcaaatgcatattctatagagagatatattcaaaaggtatagtagcgtttcttatggaaagagatctaacgtataag  
tcaagggtgaaatagctcataacatatcttatttgaaaaatgaatgaaggaaattcattaagaaatgaaaatattaacagagaaaggaaaag  
caacgaagaacaggagataccagccgaaaacaggcacaacctagcattcgaggagagaggagatcaggccaatacagaagaagggactac  
tatacaataacgaagaagaaactattcaagggcagcagacgatcatctcgtaaagatgtaagagatgttgcgaacacattataatgctcg  
accgatagggtagtaaaaacgacagttttcacctattatccagttgaaacgttttaacaattggattaatctgacttattcagaaattcacc  
cctagggtgatgataggccctacttctgctcgatttaggtctgggaaaggcgggtgattaataaatgggataaagctggcatcgatggttac  
ataggtgtgatatcgccgagaactctgtagaccaagcaaaaagcagatatcgtgaacttcaacctgctttgatgctctattttatgcaggagat  
gtttttcccgctccgttagcagttccttctccagatcagcggcaatttgatatagtatcattacagttttgcttgcaattgcaattgaaagtgaat  
tgaaggctagaagacttttggaaaatgtttcaaaatgtttgcctcgtggcggcattatgcttggcacaatccaaactcagatataatttctcagcg  
cctaaaagagctaccaccttctgaggtttcttggggtaatgacatttacagcgtacgatttacacagcgaccgtctcacacctccgctcctttt  
gcattcaatacttctttacttggaaagatgccgtaactgatgttctgagtagtggttccattttaggcatttctgcaatagcggagacgtatgatt  
tggaaatgttatggcaaaaaccttctgtgacatctcaatgaggaaaaaactctgaagcttttggtaatttgatggagcgcagaaagtagtag  
acagtaacggaaagagaggaattgatccgcaagagttagaagcagccagctttacttggcgtttgctttgaaaaagggggatctgaataaa  
cccaactttactttcacacaaaaatcaagcctatactctcttttcttcaagcgattcagtagctcctcaattagtttctttataattatgatt  
aaaaattatgcttttaataactataagcagtgttatgttcatttttttattttccccaataataagcgacagcttattctgagcttgcgca  
actcgactgaaaaatgccttacttcaggatacacagacagcagcatttttccatatacgtttacggacagatcagttagaaaaactcggggca  
gttgaatgggcattactattttgtaattgtgttataaatgcatactgaattgcttccgtgtaattatagtcgaattttgttaattcaatgagtcatt  
gcttttgcctactacgtttacaacgacatacgccttttcagacgttattgaaacaagatgatataaaattacgagaggcaagaagggtgcatc  
cgagaaaagttcgtccaagttgaatgtaatacaaaagatcgttatggagcaccgttctcatatagctgcattcgacaacaaaaacagctttgt  
tagagccttgttgcgacataaaaaatagatgtgcttatccaagatgaagaatctggttataccgctttgcatcgtgctatttacgtaggaaatcct  
gaagctgcctctttgtactctgaaagaatcttcaatctttgaaaattaaggatcatgaagggtgtccttttcaattactgtatagaatttac  
cctggggctatccacaaatattatccaatcttagaaatgagctttacagtcctgggaataatgaaaatagattcttgggtttacggtttcgg  
gaagtcaggaaatggctaaaagagtatttcttatcgtaaagcaactccgattcattatctggcaacttttgcggagataaaatcattgacatt  
cagtcctcaaaatttcacagtcgtggttatcacggatgagccgagcccaatgtatattcatgtggtattggagctgggttagacttgggttcagaa  
aagacgccaatatactttactcctgtgagcattacctataaagtggtacaaatatacggtaagtcaaaatcactcttctgcttaacagatatt  
ggaaatgtgtacgcatggggcttaattctattctgccttaggattcaacgttgatggttcaaaaaagaggattctgttcaagatccctaaac  
gaatttccgattaaaagactgtatatcatcgggattgccgaggcgacacatatagcgtgcatggagcaattctgattgtacacttggggcc  
aaaatgaggggcagcttggcatccagatgattcctcataatctgctccagctcgagtgccggttaacatcctctgtggtgaaggctacttg  
tacttcacatagcattatattatttggagaataacagtataactaatctatcgaactataagcaactgaaggttccggtggctgttgatttagaa  
agtccattaactttactaaacatgctttatcactatcacggttaatgtaagaaaaatagtggttctgaggataatctggcgatacttactgagc  
aaggagaggtttttgttattgacttaataccttgcggtcaggaaaagagcaaaagttggcttctttgtttatgaagagtaatagcaaaaattcact  
caagattactcgttttgactgtattgtctccagaaagtcagcgaatgatgttctgggctgacaatagtagtctttgttatgctgaaaaatg  
gcacgtgttgatacgtcaaatcgttctaagaacgtgagaaagcctcctaaagcaaaagcactaaaggaactataagtagtcttctgtattgaa  
aatatacaaatgatacgaatgttcaactaatgcttctggggaatattcacaatcagaatgattatcgtcctccccctattcatttaccggttc  
agaattgaacgatgtattcagttcttcttccatataagaatattttgcataagagaaccctacatttaaacagcagaagacgaagatagccc  
accttattttgacgataccgtgatcccaaggaaatgagattcaaacatttttttaaccgggaataatagtaaatagctataggacctttaa  
gcttcatcagctgatgtacttataatgcgttaatgagacttttggagccataaattctttgtcagctcgttcatcactctcgtcggatgtttc  
gtacgaataaggatgtaaaaaagacaactttggattttcgggttgataaagaagggaatcactttaatttcaatgatgtatctgctacaagcg  
ttcggtacttttgactatctttactcagactccttcttcaacctggcaatgggattcaaaagttttgaatgttaaagaagaattactaaaactca

gcaggcttttagactgccccacctacaagaggtttaccattcacagtcctcgcagccttcaatgtcttttagccagagacataaatgctctcttt  
ttaagcaagagcatctttgatgattcatctgatacggttatataactggaggatgggaattgaaagcgaacagtttattactgaggattcatagtg  
attacttcgattcgttttatacattcctagaagagcaagcacaacataaagcagaaaaatgtagttaattaccagataagaatactttccattt  
tggactcatccttcgacatatataatggaaatggaaagtttagaaattttaatgatcttaaggatcatgattttacagctggttgagacgatgacc  
ggtatgttgagtatactgatgaactttttatcgactaaaggaaatgttgagcaatctttgcttcaatttctaaatctgaaaactgaatgat  
atgctagaattatcttctgctatcacgcagaatcattatatactgtagtggtgattatgctgtcacaacataggctatTTTTGGAAAAAATCG  
attaagtgaaatgggagaacaaacatcttgcaatgtatcaaagcgtttacattcaagtttgcaagaacaaagattccacacacaacctagtaagg  
tgcttaataagctgcttttcagaaattccaaatatttagaggaaaaagcatatgaattaaaggtttgcgggagtttctctttcaggtgaatcaac  
agaattttgggataagctccttataggacaacgaaagaaagtaatgcttctctattcaaacgcagccgcaatcgtaaggacttatttgaaca  
aaaggtgaaccagtcagagctgttgaaacttgagtcaagacaggagaagaatcttaatcctctgctggacaagggagcccgaaacattgga  
acctcatcaagcctgttgcctcatacagtggaaaaatcacatcgcatggacacccgttgcggaaacattaatagatcacctgtaatgaatga  
tgatcatcaaataagtcttgaataatgagagaaaaggccttgaaaactcctaatttagtgacaatgcaaagaagcctccgaatcgagcc  
aacctgagggagttgctgaagaagctaataacgtgagcccgtctacaactaataatgagttcgtggtatgaaaggttaatgaagaggtcgca  
gaaagagaagaaaaagagttatctaagcagcaacagccaattcgaaagggacagcgacgatttgagtggaacctgttgaacatcaa  
caaacgcttggtcaacaaaaagcctaccgtttctcggctactaaaaacggttaatgggattctcgagaagtagctagtgaaacaccta  
gccaggtatTTTATAAGGAACCAAGAGGCGTATATCCAGCGTCTCCGTCTAGTTGGAGTTTATTAGGAAAACGCCATTCAACAACCTTCAT  
cattgcctaagagtggagcccagccaattccttgatggcgattatgtatgagcagcaagaagaattgaggagcgtaaaagacgactggcaa  
gcagaaaaacgatagaggaaatccaacaggaggaagaatttcaaaagtggtgggaagaggaaagccttagggtcaaaaggggctcggaatg  
ataaaatcaaaggaatcgaatgaaaaccccttcaagaagaagccaaagaaaagcgacagaaagaatggcgctccaccggtaaatcaag  
ctctcagcctattgatattcctctcaagtttaagaagggttaaagccgaatatacggtaaataagtctgtaattagaatcagaaggtattat  
ccttataaaaaatgtgcatgatgagaatattcataaatacttattttctgctaggttctggaacttacttaatggatggaacgaaatt  
tatttaactatcgggaaaggttgaataattcaagcattattttacacatagatgagtagttctgtaaattacatactcaagaatcagac  
atagattcctaaaaaaaagagaaaaaggggtggagattcctaccacaagactgatataaaacagagtaaaaaatgtaaaatgatga  
aatggggaaggaataatagcaatcaaacatttaacgtgaaaaagcacttactagcttataaaacattaggaacgcaagtacgaaaga  
gatgttaccttcaacaagcatgtatgaattacacaaaagaaagatagccagaagcaaaacggaaaggataagaacagcatagccagtac  
gatagacaccttaagagtttaattcttctggtgtcccaaaccaagtgacgaagtccattgtaaatgtggaaggtaaaaggataggagacagc  
aaatttggcaggaacctttatccaagtaggaactgttgaagaagaccgaaatggttcggatcaagagaatagccagccaaggagcaacc  
aagtaaccagtcgaaagaggtaaagagcaccagccaacacaccagtaacaggtgtatactggacaggtaccaagtcattgaggttca  
tagatggcaaatgaggagagttgggacgatgaagacgctgattagcaagacgggaccgcttctatttccgtcatgtgtcagtagcgagcga  
tcgttccatacatttctcaacaatgaagaggaagaagagatgctggaaggacgcaacaattgagaagcagggcggaagaagcccgagaaa  
gagaatggaacatacgggtagcgagcatcattcaaatTTTGTGATGAAAAAGGTGATATGGTAACCAAACTCAATGTTCTTTTTGGCGTTT  
taattagcaaaaatagagccttctctgcaatttgaccctgtttatcctcaaatcacaacaaaaataaactagtggttttagcgaatgga  
attccaacccagctattggaggataaacgacagcttgcgaacttgcaatcaagcgagatggagcgtactacaacgagaaaataatgtcgtc  
aagggctcgaatcctaattaggacatgtttatgaatcaaccattcacttttctgaaagtgtttgcaaagtgggcttctgtaagaacagttta  
atgaaactgaatgatagagaagaatatactttgagttgtttgggctcttttgggaaaaaaaactgtttgaacgacagaatcctgttaca  
tctgtgggacaggtatatacatttgcatagggtaattatttgattgaaagaaaaactattaaaggactattactattataaaaaaggatg  
tctgagcaagattacacatgaatgaaagaagcattctggagaatcacagtatgatcctgtcgtcggactctacctgtatatttaccggca  
cttcaaaccttactgttgaatcaatatccttaagaccaaagaatcgtgaatacagcagccggaccggagaaacaccgatgaatgcagcat  
caagcctaaaactgggtggatggagatggaggtgccaattcctaccgcaaagtattttgacgaagataaagcaaaaaatacagtgccaaga  
ccagccattgaggacacaagtgttctgctgtcctcagcagccgcaacaaacctgatggtaggcttaattcgaatggacagcttcatatcgt  
tcttctgctggattaaccaattgcggccttctatgcggcatgtagatgaacataatgcaaagggtaaaaacctccagtacatcttcgacaacatc  
acaatcgaacgcttccgctcgtggaccgctcgtgccatccaggtgacagctaagcaaaaacggaggctcccaaattgtcaacgacacata  
ttattagggcaacggaagaggaagagtggaatccattgacatccgggagaatgaagaggccaacaccgttgcaaacagttggagtgccct  
tggaaatcagcctaagtagtgacaccggcgagctggagtagctgttcttttaggattaaaagatataaaaaatggtttactttcatgtttct  
aatggaagtaacataaatcaattttagaatacctataatttctatccactttcatgtaaagttgtctacacctggattgaggtcgtccacaat  
ccctccgtaacggataacaaggctgacgttttagtatttctactactttattggagataatggaatgatcttctacgttgttacacctacaagat  
aaactcaataaactccataaccaagaatcatgcttattgatttttaacaatctactgacgagcagcagccttggcgttcttgatggcttgacc  
acgggcagcggcggaagacttagcattgcagccttctcggattcggagtagccttctatccttggcttcttcaagtagaggcacg

ggcggcgacgaacttcagggcgttggttacgcttctctttgatgacatccaaggaagcaccgacgacaccacttggtgcttgacagtacggc  
gagagcgcttctggcggattcttcagagagacccttctgtgcatacgacggttagaggacagtccatgacaaacggcgagggttctgcttggg  
ggaagggtctcagacttctgtttacaagcggaaaactttgtgtctccacgaacaaagagtctccagctcctgggtaaactttagcaccgg  
aaaatgagcagatttccacctcattatgccttgttgcgtggtcttatagtcaaaaatatttccctaccgggttgggttcgaatatagcagtca  
ctaaccctaactgtcctataacttaggagtcgattttctttcgcaaatcagaataacgaagtgcgtaatgcttttccataaataaataaataat  
aaaaaagcatttctaccttatgtcagatgcgttactggaataaaatcgactctataatcaaattcatgctaaaatttattataactaaatatactg  
cccctgttgcctatataagcaatcacgtgaagattattgaagtgaaaaacttctttcattgatataaacacctttgttttaagcttgaacacataa  
aaagaattgtcataagaagatatgaagaaagtggttagatagagcgcaaagtctttgtattgtttgtttacatggaagaacttgaattcaatga  
atgagaactaagcaacatgtcaccgcagaatgtaaacacaacagtaaggaagaaagcagttgacaaaacccatcatcaaggtggaagaa  
caggttccggaagatgagcgttgcgaaactgcggggtctgtaaatcagcttcaatttctcagggtgcacctgccaagcagtgcaaatcccg  
gacgtcagcagctgttaaaactggcagtttcaatcaacgccaggtaaaactatcctgtgacaaagaaagacagtagagattagaaggaaaac  
ggtactcttcttaagcaaaaagatgagccaattgcaggtgttcttcgccgatgggaccacaatggcgggacttcatattggcatgttgaat  
aggaaagccacttggaaaggaaagtttgggagagctatttagcaaaggaaagaaaactgggtttagttgcatataaaacgctgcacaa  
atctgaaactattcattcgagaatcgaaaagcaagtgagaagagaaatgaaatccaatcgaaattgagacacaaaaacatccttctgttattt  
gtcattttcatgacgaaaaaagaatatttttaactcctgaattcgctgggagaggagaattataaccagcatcttgaagagcatctcgtttccga  
aagcagcgctgccaataatatactcaaatggcaaacgcattagcctatttacataaaaaacatgtgattcatagagatataaagcctgaaaata  
tttctcggaaatcgatggtgaaatcaaaactatctgactttggatggagtgatcatgcaccttaatcgctggacaacgctatgtggtactctagat  
taccttctcctgaaatggtagaaggtaaaagacacacggaaaaggttatttaggtcatttaggtgtcttacttatgaatttatcgtgggcg  
caccctttaggagcgttctggtcactcggctacatacaaacgtattgcaaaagtggttgaagattccttagcttctcgcgagaagcaaagg  
atttgattactcgttcttgcacacgacctgaacaacggatttctgtagaacaggtcgtcaagcaccctggatgctaaaacataaagcttctt  
ggagctctgatcaataagatggaagaaatgggcttttttaggttgttaaatattttgtgtgatgtttatcataacttcttctgatcacattaat  
tcgaatttttaataatgatttttgatacttttcaatgagagcttgtatttccggtgtttatagacgtatatctatggtggagatgagcattatattca  
aggtttgaataaaaaggcgaagggggaaaggtggaaatgaaagtgaaggggacttgatggtataaagagagagagagagaggaa  
gaaggatgaagaaaaaactcttttttgaagtgtgagagaaatagagggatacttttaatttaggcagtcaaaagactactaaactcca  
aaaagcaaaattgcaaagtgaaaaaatggttttggagtaataaactagataggttaatgaaaaatagaaaaaaaataacaacatactt  
ttcaaaaggctggtatcacgaaaacatgaagcaaaacttctgaacaatcatttctgctgatgcttcttggcagttaggattaccttggac  
agaaagagctgctcctgtttacgcaatgttgatgcttccgaatgtatcaatgttgcataaaacaattctttgtccaccggcattcaccgc  
tgaggctactgacgcaatcagagcatgatgatggcgcaaatcgttcaattgacgtgaaaacgacctcatcaaacatataatcatttcat  
gagctattgtttttagcatttttccgctgtaaagtcgattctcgcatagtacaattcctttctggtacgtaccgcctgagctgttcatcaca  
gggttcacaccgaatatcggatgatcaagaccggaatttagatattttaaagacttttcaaaaagacgagaattggtgagctgacaagagag  
cttcttgatacgttccagttttgttttctactcggctgatcttctgcttctgacatgctgcgctgctttaatgatataatttaggatccagt  
cttgaagcgactgcagaaatgagatgtaatctatgaatgtagacgttagttgaattgtcgtttgaaaagggaaataaaaaagaatggctt  
cagacagctacgtctcagttcaaaagaaaaataattcaaaagtaaaaaaggaaaatttgatacctcgttgaattctttttagtcaattcaac  
tcttaatttggaaaccgactgcttggataggatctcaaccgatttgcatttccgagaaattactacgatatacattactcccgttcaaaaaagg  
actaaagacagtagttggcagcaaggaaaaacaagccgataaagaagaactagattttaaagatgcttgaaaaagttttaggtgaaactc  
gagccctgctggtgcttctgatatttttactagataaactggtatgaggaacaagattgaagcaagaatcggctcatatgactaaaggat  
gaattcacaagagattcattcattgagaattgacctaatgggaaaattacgaagtagcaaggagaattacctagcaaaaaacaacaagga  
acgtgaaatccattcatgttgacatgcttctctagatgacggaacgcaagacaggttattacaattgaatcgttggatataagtcata  
attcgaaaacgaatctgaaaatgaaggaaccgttctacatacttgaatctcgtagtagtcttaagagcatattatcatattagcacaatata  
tagtcatagtagcatataagggtattgatggtataagcttttttatttcatatgcttctcaatggatggtaaatggttatttaagaattagtggtg  
ctggcctcaaggaaggactgttctacagatgatagaaaaatcaaaactagtaaccaagatttttattgaatgaacgagttgttattttagcc  
agttatgaactggatggagtcgaaactggcttgcagcaagttgttttctcatcgggaaatgctgatcgtcaatacctgcaccggggacgtaa  
acaaacaaaacgtaactactgactacaggattgaaggaggctacaatccattctgaaaacaaaagtagcaattttaccagtggaataagatac  
gaattatggtaaagtaaaatattgaaaataacaaaacaagataggataggataggatatttgaatataagaatgaatttattttagtggcattttgc  
acttaataatttttagaagaaagaataaattggttaatccatataagatataataacatctattaagaaaatataagaatctattttagccttgaagaa  
agttccacttttaggatattgtcatgtcatgaaaggtgtttgtttgtattatataatagtagtataatattagtagatcgcgagataaaaacca  
aaaggccaaaggatgattgataccttcaaaaagtaaaaaacaagaaaatacagatttcaacaatcgggcagccttccggaacgaaagtc  
ttatatacaaaagaaagttgtatacaaaagagatagattacgtaattgttttagcgaagatataaaagtagaatccacagtcgaattctcaga

ttggaagattcgactggctgtaataagatcgtcttctactttcaatttggttaaccagatccctggacattactaccatttatatacgcagta  
taaccaagccaattaacatatactatcgattagatatttatcataaagagtgatgattttaacgtggcatctccaattcaagtgaaaattg  
gtttaaactgagcaacataagtaaaaacatagatattggattctgaaaacgcaggagtgatctcgctcacaaaaggagatgcaaccggaa  
ttaggaaaacaataaaggctttatccgatcaagtcacccaatgcatcaggaattaggtaaacaattaaatgctttaaactgaccagatcacctta  
aagaaccaagacagaatggaagaaaaatgagccgatgaaagttgatgaagactttattccaagcaacctatggacattatagcattggtat  
atgaaaaatattggccaatgacagactctatctaaaaatgattcatccgcttaacctggaattggaatattgaacctctgaacaatctgtag  
cagttttgaaaaaatctgcaaagcattttggttacctaagatattccatctgatcgcgagaaaattgcatttttatattccaaatcccca  
gaaaattccaaagacagatacgaaaattggtgaagttccaggacctcagaggacctcaagacggttttgacagacatttctaatgaga  
gcgagaaatattggttcatccattcctaaatattggcaaaaggagctcgtggtgagttagatgtgtgaaattcacaatggctcgacggat  
tggacatgaacacaatcaagaaagttgttattcgattcattcaaatttttagaaacgaactcctcaaacataattacgagcatggcaacc  
acgctgcagctgtaaaaaccgtaaatgaccaggttcgatatacaaggtccaaaaatcagagaaaagttaccgtccaaagttccgacctacaaa  
ctttattccaaggaagaaggagacaacctatgctgataaacggaaacaaaagcacaagtttaatactagacaaaagggataagtctaagaga  
gatgaagtcgtctataaacaataggtgtgaaaaattttcaaaccaccaggagaaaacaccttccaacatcaagatgttaaactgcaagct  
caaggtcaatgcattatagatactggcgccaatgtatccatcttgagagaagataggcaacaaattacgctgaaatttataaaagaaaacc  
gaacttcttaggaataacgcatgacaaactgaaagcaagaaatgaaagctaccggtagaagaaataatcgaagattttagcaaacggt  
cataattactccaactccgacaatgaagttctcatcggtggagccttttaaaaaattgggaaatttggattttcttatatggcgaacaaatct  
ggagaaagatcagacatatgcaaaaacgatgcgaaagttcaagaaatattaagccattcaataaggtattacagacaataccaatatacc  
gttgcccaacacttcaatagcatttagagattaaactgacaagagagctaccagattatgtacaaaattaagactttataccaaaagaaaa  
atcgataatggcagaaaaggtgcaatatttaagtgaatcgaatccgcaaggtcatcaacatttttgcgaccattaatagttccaaag  
aagggaacagataaatacgaagtcataactataagccattaacgcgattacgaagaggataattatcattaccaaatccgaagaaat  
tatcaattggctaagcggagccaaagtttagtacaatcgattgaacgaagcatatcatctgctaagaattaagaaggcgatgaacataaa  
actgcctttaaactcccttggagcatatgaatacactgtaatgccgttggattaacaaacgcgaccgcaaatccagagatatcagtaag  
gtatttctacctgctcggcattatgttatctttatagcagatattctgataatcctcatcggaagaggaacacaaaatacattgcaaga  
agtatttcacagattagaggaagcaaatgtatgcaaatcgagagaaatgcaatttctcaaagacaaagtaagttcttagtcacatatttct  
gaaaaggaattgaagtcgatcctgaaagaataaaagcaatcacaattggcctgtaccaaaccttaagaaggttacagtcatttttagaatt  
tgtgaattactcgagaagattatgccaatatttcaaatggcaagaccattatacagatctacaaaaagaacgtaaaatataaatggaccga  
tcgtcagcagcaggcttcatacaagttgagaagaacttaaattttctatgttgaggcattatgaccccaagagaaactagattgaaact  
gatgcttctgactttgctatcgatactctcaaaaggcaagacgatgacctttatcatcaattgcttttctcagagacattacagatcgaca  
acgaattggccaacatgggagaaaagaagcgtacgcaattatagcagcttacgcaaatggtatcaatttctatagatactgaaaagccattta  
caatttaacggattataagaatctaacaacctgtttacaacatcaaagcagatcctgtgcaagataaatagatgggcaactgaaatgga  
actataaattttgaaattatcgaccaggtcgaagaatgaagctcgagacggcatatcacgacgtctgattataagacgcaaacgattaatcg  
cataatagcaatcgattatcttccaacatttctgatcatgtgagacgagaatactctattataaaaacttccagaatctcctaatggcacagat  
cataactctgattatgtaaaaacggcttattctctacaaacgaggacaaattgtcataccaaagataccacaaatggtaacctctacgaagt  
aacgaacttcaaactagctcaatctaaatagaggtttataaattcggactcggaaatcaccactctcgctgtcttctcgaatcgtagacataga  
acctaggcttatgtggcgcaagataatgtaactgctcgtgtagtctaactcgagaaatagctaggattataccaagacctggaccgcatagcc  
tcgttgacctcgtcgatgtatgttgggttctaccgtcagcactctcaatactgcaaatgtatcattgacaatgacagcattatgagtagctc  
atgaacattctgtcgtctgcatatattgtatgagcgcacccctgtaattttcttctgtataggtggtcggtccctacaacattgctacattatgtt  
ccctgagaggtacggtaacgttaattgccaatgtaaccaagatagcttaagagcggtaaacacagatattgctttctgctatctcacgatatgtt  
ctgtttatattatataattcaatacactatcataagagcatttgctaaatattagcaaatgaaataagactaaaggatgagatattcaaatggt  
aaacaaaacaagaaaatacatttaacaatcggacagcctcggaaacggaagccttatagacatagaaagttgttttacagagagata  
gattacgttagttgtcagcgaagatataaaactatgaatccacagtcgaattctcagattggaagattcgactggtctggctaagcaagattg  
tcttcaatcatttcatttagttaccagatataaccctagatattactagcggctatatacgcagataactaagccaattaacgtgcacaaacct  
acagttgtagttacttctctcgataaatgttctataaacctgagattatcaacatgactgtttattgaggagacgtatttagtcaaccag  
gtataggacattgctgagtaaatagctcatttggacttttttcaactcaaaaacgtcagccttaggcagtcacagttgattcactctca  
tcaacataatagtaaagtaggataaacatccctgacaaatagcttttttgagtgatcacataaggatacggataaaagaaagaggattatgg  
aaaaggaattcgtacttttgattaactcctcaaaatcatggggtatgaataaggagatggatccatttcataaaggaatagattcattgaagct  
ttaataaaaattcgtattgcaaatgattccatttcatttaataataatccggttagcaacattagaatataaatcacaataggttttaaga  
tttcagttgagatgtatcttaccctgtaatttatgaataggagagcttttaggggagttgaagccaaaaaaataatagtaaaaataaaaacaaac

acgcactcgtcttagcttgttcaagagttcctgggtgatcttaaaaatcgctgttccatcttgtgttttgaattagagcttgattctattagctgct  
agaccgatgtggatggaaccattcatcagtttgaattgtcttgatactggatctgctgcaagcaaataaagaactgttctacaatgacaacca  
gtcctcgtatatgaaaaccctagaaaattcatttgagcagctccacacgatagaaagaatgcaaataaattgaatttttaaaaaaatagcgt  
taattttctgattgcatttgatttttacttctaatttttttacatttctttctgtattgtttatgattgctgtttcctttgcatttcatcactcgtt  
ccattacgggtcatatattagataacaacgcactaccgaaatccagcgaagtgtggacttgagaattagagagaaacttcaccttggaaattacca  
aacatacggcttaggaaatcttgggaattgggagcattttctgtatttataggcaaaaatgagaccttaacgcacgaggaaacaaaaaccttct  
ttgagaagcttctcaatagtaagcatggaacagaaaggagaaggatcacgggtgcaattaaatTTTTTTTTTgccaattccgacatgaaac  
ccaatccttttacctttagaacatgaaaaagaatctccaacggaatattaaccaatgattgtgtctagtatcggtaaaaaatcactcatttaatt  
gatcggccagacgatcccatgttctgtttacaaaaagaccgtgttactatgtcaggtaagtagtttctcctgttctcaaagtttacgcttg  
cgttgcttcatTTTTGGCGTctattTTTTtaagtctattcactaactctcgggatagcgaaaaatgctatgaagttggctacttctgttctgtacaaa  
tctcatgtccttgggtatttcttggaaaattcaaaaacaaacaaatctgcttacacatcacctcctggattatattgctcagtacgctagat  
acaaaattgggtcaaggccaacgggtgaaatgcctttctgtatggcaaccatgtcctgaaggctcatgtgggtcgtattaccgacgacacacctc  
aacaccaagggtcatcattactccatgaacgatactccttgggcttgggtgtgaccgctcgtctactgttgaattgtcccgttttagatcccaccg  
gcattgttgcctccaccaagctgatgttggtaaatattgctgatgaagatacttttctaattaggaactgtatatgtatatcccttcaaacga  
tctcctcctccttttcttcaactagtccacttactagatgttctcctcgaacatctctcctcaaaaacaaagacgttctcctgttatcagctag  
aagagtatagtttctccaatctttttattctgttttgagtttttttttggataactcaagggtgttggatttttcttactccttctacgcttaaaa  
aatacttcaacaagaacggtttgggttacacggtttataattgtagaatTTAATTAAGTgaaaaatttaatttcaaaaaacgtttacc  
tagtaaattctattttcgtagaaaccttttatatggatagaaccattttgccatcaacagtgaactgagaagaaaaactacatatattcatga  
cataacctggttctaagtagcaattccttgcattgttctgccttggttttatctttacatttgcgatctcgtttgggaagccagcgttgaggatct  
gccgctgtgttggattgaaattccttggcgttaggctttctgcgcttctcgttttctcgaagcgtcattatttgcctcagcttcaatgatccaatagt  
agtagatactggaactccttggactcaacagcatcaatatcaacgcttctatcaaatctgacacagaaattaaatggccttcaagtattacta  
atggattcatcaatatagcaaaaggcagccacttgcgtgaaaccaactcactaacaggaccctccaagcaattaaatttctaatagtcttcaa  
accgcttgcacgacatccacacttgccttctcatcaatcgaagctaataatgaacgtgtgcataatagaagttggcgtggcaatttggtttacc  
gtccagatctagcagcagcatgtaattttcgacttggagtttgagaatgttgaaccttagaaaggagtcacgcctaaaccggccatacca  
ggagaataccgcaatgcaaaatttcagaaccttctaagtctcacacattttctgtacacagctaatgcgccgataattctcatgaaattt  
tgaaattgaattagcaaaaggcgtacaaagcatcagcaggatttttctgaacttataaataaaaaatccaggaagcttctggaagatgaaagtg  
aacctttctcgttctgacatgagaacaccataaaaatagtttatcctcctgggcacgccttctcctccttcttgaacagcccgcaccttacc  
cggccatgtccagcagggccagatttgcacaagttgtaagcttggagaagctaacagcttgtaaaggccttctcaacaggagctcatgaaat  
tacgaaatgcaagatagggattttcattgttttaggcataagacattattaacaaacagaacgcgtgaagttcatcagactaatttccattgtca  
gtaaattgtataaaggatttatgatgaaacataccttgcgaagctattttctggattcttctcagcttttgcacctcaccgacattaaatgtgc  
ataaaccaactgcagacgacacaagttcatgagattcttctgaagacagggaaatctttgctttaaatttccggttaaagaagacagcaa  
atcaatggccttgccttattgtgaagagtaagtaacgagtagtaagtaaaactgagaatcttgatcttcaaagaaggaatgcttcaatttgc  
catccgggaagctgagaagccacagcaagcattcactgaatatcagattgttcttggctaataagagtttagtttagctcgttttctataga  
aggaaaagaaatattgcattgtcaatcaatatattgaaaaaagcggttttaaaccctgatttgcagaaaagaggttcgtaacggcgtgggttga  
tgaaattatactaccagttcccttgaagcttttctgaaattcaatagcttttgagaaatctgattacggtaagcctggctatgtaataata  
aaataaaaaatccatcagcacaagaacaagcgtagatcgtcgtgtattgtgaaatttgtgttaccttctgagcttcaagtgttgataaaat  
gggaatcattattgcaggataatcttgttttaaaggaaagcacaatagacttttcatacatagcatcctgccgcctaaatactttggataac  
atccaaggcttctacgtagcattccatcaatcaagttcaatactttcgtatataatcaatttggaaatcgctacttctattttaccaacacgatc  
ggcaagagtagtaatttcttctcagatccgccatgttgggtgttcttgccttggtaggtcttactaccaatttgcattcagatcgacacca  
aaattcactgtacagtaaatgaatgtcataaaagatttaataaaatctcacgcgtaaatgaagcttaaagtcgctagaaacatgtttttc  
ttcagagatgatcaacgatatttggctacaaaatgggaagaagaattgcaatgaagtcgttctatatgtttatttggttctagattcttcaaact  
ttcgtttctgttcttcttctgcatcgaagtcgctgaagtgcagggtaaaaacataaagaatcacaagggcatctactatcctgtaagtaag  
agtagcaaccagcagactaatgtacattggttaaatactatttctagcatgaataagaaagcttcaattaaagggaaactaaaacgaaggccat  
agtctagtaaaaaggtttaaaaagatccacagcagaggaaacactacataaaaaataataaataaaccacaaaatagtagcaaggaaagat  
taaaaaagctttaaacccttggagaatcaattcttttggcaagactcattcgtgcaaccaggacatctcgggtaaattgacgggaatga  
gcgggttctgttctaaatgaagcttcaataatcgccattcctcaatagcgtgggattatcgtaataactgggtgctgcttaactcccgat  
gccttctccttggcatcctcaatgtaatcttgcagttcctttagggttcaataggtctgaggtaaatgcgacaggaactaaaatcatgttctgtg  
gccttgtttccaagttgttgaatcacgtcttccgtggaaggagacatccaaggaataggaccaacttggactgccaggagttataaatctgttc

ttgaatcctagttttgcatcacgccgtaagtagtagcggcgatctcattcacgtatggatctccttagagacttgagacatgggtaatgaatgag  
cgctgaatataatgacagcgttatccggtcttcttaggataggtctctaaagttttgaaatattctccgcaaaagcgtctaataaaccttctgta  
aggaccaacgatccaaaacagaccactcaacatctgttccatattcatttcaagaagctgtttcgaagttcattcagagaagcaccactcgtcg  
aacaagaccattgaggatactgactaaaggcaaccgcacgcttgatgtttggactcttcagttcttttagcatttcttctgtaaaaggaggggcata  
acgaaaagccacgaatggaacatgaggagccgattgaggagaggtttcatctaggattttacaaattcttttcttgatattcagtccaatgcag  
gattggacttccacctcaatttcttgaatgctctcgaacagcgggagtccttcttagcaatgaattttccaagttagtttgaaagtagccta  
gtggaataatcaccatcagcaagagctttgcaagaaaggccaacctatgtttattaatattgacgtttcatcgacctgaaaaataaagtg  
ctgaagaatcgtaacctctaaattcgatggtccaccatatttagcatgacaatagcctgttggatgtagtaaccaagaggaccttaaca  
gactgtacttaccggttgccctttttggaagcaccgtctgagaccgataggttctgctgttttctgtgccaacgaagaagccatccttgaagc  
gacgatggattctggaagccagagtggaacttagtggaaaaaatctggccttataacgggacatcgtgcaaacggaaatcgaatcattttctg  
aatcgtctggtgaaaagcggtaggtgttttactttctatgagtttaccttgagaacttctcagttgaaaaatttctcaaatggatgaggagaa  
taagaaggcaaaatttgtataatcgggtgctgttatttttagcttctgacaaataattttgtaagaggaaaaccaacgacttctggggcggt  
aacttttctgctcattaccaagcgattgcaatccaactattttatgtagaatattgaatgaaacaaaatcttctcattgtgaaaggtcatta  
tgctagaacatgtattatgtgtttgccaattactatatttgaacactttctgttagtacgattaacctaacaatataaataatcaataatgcgatt  
tatcaagaagcctgaataaaggaaatcgcttaaatgacttcagagcatttatttttacaactaggacctgtattctcatgttctgttaa  
ggtgttgagcgcgacggttttagtattataaaaatcgctttgacgaagtgctacgttctgttttctggtaaaagattctgctacgcttttcaa  
ggcaatatgtataaaacaactcatatctgagtgcttttctttcaagttttcaactaccacaaaagtcacagttgtcaacaacaatgacatggac  
cacgaaactacaagaagaatgatcctttttgtataacctctcttttagtaagtgagcctataattataccactatgtgatattctgtacccttata  
ctttaactcaattgaataaaaataaattagactatccagcaccaaaagaacaccattttgaactaacggataaacgtactttttatctttgtcttt  
attttttaaaaataaatgcttcatccaactgaaggaatcacgaatagcgttgaaaaactcgtcatctttatgcgagcagacaattacctcgtctt  
gcccatatcgtttttatggaacacagagaagaagatggtcgacgaaccataccaacaccatccaacgcttcccctgacctagccaaggtttgga  
tgcttatcagccgtatcaatgaaaatggtatacgaagacctataataatcataacgaaagcgataggataaagccaatagacgtgatttc  
cgaaaacatggataccaataatcaaacccaaaagctgaagttaacactgaaatgttataaaaagttgctgaagacatacggaaacataggg  
agcaagcgaatagagaataagcataacaataatgaaaccagctagatattctccatagcacgagccaatgcaaatgcaaaaagctttgctg  
atcgaaaaatgaaattctgcacaactgatgatggaggcataaaaggctcatttgaccgacgactacataaaaggcagtttagaagcaaaagtatt  
cttcaatcgtgttgaaagaccgtaacaggttgcgccaagaatcatgtaaccgtcacctaaaccagggttcttgcactttttcattgctgcatag  
ttttcaagtcactgacaacaagtaaggcaaggccaccgatacagaccacaataccgagtaactgagaccagtggtatcgtacttttaagaaga  
aaaacgaaagaatgacaactgcaaccgtagccaagaatctaaaagacttgactgatcacactggatatattggttagcagagaacaacaaaat  
aattcccctctacatcaaaagaagcaaaacaaaatgacttccaacatgacgaagtaaccattcaagtaacttttaaccccattcgatagatgg  
tataaggcgtaaacatgagagtaagcgcggcataaaataagaagattgaaaagctggaactttcccctctgacaaaagccattaaaagt  
attactagcagtttagcataatgaaagcactgaccaaaataaaaacaatcaaaaacgttgtttgttcaaacgaaaaagccctggttttat  
tcgctcaaacgacggggatttgttctattgaacgttctgtgaaggtggtctgaattgtacgtcttcacactagaagcatcatctagggtccat  
ccaaaggttctgtagagacttgccttctgtttatccattgatgtttgtgaagaccctcattcgactgttctgactgggtgagttgccaaaattc  
agcttctggttaactgttatgattcttccagcttgcattgcaatgcttcttattcaaaagttgatttctcgcacccggggagaatgttcaattggttga  
attggaactctgaagcgaacctgtttgcgcaacacatattcatcagagaaatctgtgctagaaaaggaggattgatccctcgggtgatccctaat  
atggatattttcgtcatttgaataatataatgcaaaattatgccgtctccggctaattgtaaaactgcggctgtttgagaaggtcatgtaaaatt  
cgaccacgattttcttcccctgattattacagtaaccgttgatataaaggggcaattcattgaccaatagcggaccacaaaacaagagaaga  
gaaaaccgaattccttcttcttttagcgtttattttttacaaaatcaactttgtcagtttttgaccgagtttttacctctattgtttattaataat  
tctgtggaatgctgtatctatttctatcaacagataatgaagtatactgtatgtcattattgaatatacggcggagccataacgagcttaaagtct  
aaagcaataagccataaagcagcctcggcaataaagtttatgacgctataaaaaagaaccaatcaatgacagcatgcttctgtatgtcaca  
aatatgatgtcaagcatttcaataaagcttagactaatttagagagaaaggtcaggcatgccaatctggggatttagagaaggaggaaacgc  
tgagttaaaggtacgaaggataaaaatgcacttctgctgctcactgtataaaggctgtttgtttacgtcgcgaaggatgagaaggagaatacc  
aaaatcaaatgagaacgtgtcagaaaagatttccagcctcaaaaactggttccaaaacgtttatccagataacccttaccctttctcagtttc  
aaaggagaatctgagtgagctgttggagtgatgcttacaacacaattactcaaccggtagaaccaatctagctctttgggctttaattggctt  
gagattttgaaatgcttctgtttcgcagcttttaggaattgataagcgggtgttaggaggaagaaagtataaaagcctacctacctctaccttagc  
aaggagaagctggtattcaaatctatattctcgacatagatccaccaattttttactagccttctgttagtgattactcattatcgaacaatcaa  
cccccttttgcattaacctgttcttgcggactagtgtacatcgtcgcacgtccttctgtttatataatcctggtaataatccttcttcttctt  
ttgtatcagtcaccattacataacatttgccttgactctcttgcctgaaaattatataatctatcacattttgtgttctgtttggttaga

agttccctttttgtttcccataaacaacactctacttatacagtgttgttattgaattggacttttgcgtgagcatatacttcagtcagatac  
cgaagttccactcattcatttaataaattttctatattcggtgaatccccatattcttttgcgtttccaaactcttcttctatccccattattcttt  
tctgaattccttagttccagaaaaagatcgtattcggatttagttgtttctccattggtgcagcttcttttggttcttctttcctttcgat  
agcctttctttttagttgcaatttcagttaaatattttcctaattattacctcttcttattgtttacctcaatccttagagttgtgtacaataa  
acaacaacaagcagaaggtaaatcggatcaagccattcttttaagacattgaaaacctcatattctgaaaagctttacgaactcgttttac  
ccatacatattgtttcctactgtcatcgggtatattttcaagtaacagttttaccagcaatcattcatccagctcttaccattttcattctacaga  
gggttttagccttcgtttctattaataaactttatccaatccgtaggtttttatttgagcaacaaggcgatctcatctttcaaatgagtcac  
tgtctacactcaacaatcatcagaaacctgctaaacctgaagatattagcggacgaatgtctgtcttagtctttcttaaccttggacaacgg  
gtctgaacaaccgcagacaagtcatagccttgatggaagttctggtagctgtcaatccctgttatcaggaatgtcaaatgggtatccccaccg  
ttgaattatcttagctccttaccccaacctgcaaaatctgcggctctccttatctgtcaaacatgaatcctataggaacgagccccacgaat  
tgccttctgtctccacaaatgcttcagtgacgttcaggagtggtggatgcttcaagcttcccagccaatcgtccagtgcaatctctcttct  
ctctggaatccgacttatgattcttcccctagcttagaaggaataggaatccctccaaagtccgtggcaatagttgagtggtttcggatggtcg  
ttcatctgtgaatacttaaacctgcttacctcctttgacctacaaaatggaggataaacctttctctcggtaagaacccaagtttggtcctga  
acatataattgatgatacagacagatcttacaatcgaagagcagcagtggttcaaatcattcactgactttactctgaaagctttaactttgca  
cgctccatgtcctgatggtcttctgatgatattgacaaccgagagttcagtgggatctttacgttttgaaggttatgttcaatcaaaggtgta  
atagattctggtcgtgtaaaggaatagttacctcaataaccgagtgacgctaccaaagctaaagcaaatgtaataagctgcaacaacac  
attacaatcgttcagggaaacctccaatcactgataatttgcaacaacgagcaactcctcgttcaatccaggttcaatgccaatcaacaagaa  
gctcgacctttattaggaatatacgtccttctcaaatatggaaaactcccagtaacctgattcaattccgaaagcaagatgtcctcttttcc  
caaatcttgatggcttacagcttctgcgagccttgaaaggttcaaaaaccgattatagagccaaccaagaacatctattaggagcttctccatt  
aacttggaaaaaccgcaactttcagaatggaggataggagataagacttggataggcctcaaactgtaagaatgggtataataatacc  
acggccaacctctactttcaaccactgctccaagaaaattacaagctaccgacaactatcagatattagcgaagctaatcccgctgatgat  
atcttggcagcttgcacctacgattgaggatgaacgtttacctctaccgaatctatctctccgaaagccagataccatgccactgaaaaacctc  
catatcaaaaagagaattcttttcatctttcaagggttgatcgtcacaaccggttgaagaggcctaaggatggaacgattgagtcctgtcaa  
agagctgcagcaattcggcctcgagccataaccttaacggcgtagaccctacgaacatgaatctcatcgtcctcaaaatggaacctttgc  
cagattaaacgttgtaagtcaagaccgtcccttagaaagcggccaattcaaatcctcaaatctgaaagcaacttctatcgtcttcaggc  
tgatacacctaaagtagaattgactccgatgccttagaagcaaatgtcacacggatcataaacctcctgtaataccatctatgtcggaatat  
ttctgcttagaccaggaaaaggagttgcggaagcttttcaacacagccagggtatcgagactttcttcaagtaaagggtataaaccaat  
gtgctcgtagagttgaaagatctttagctacaaaagcattaaacaaacttcaaggagctatcctaaaaatagccctaaagggtggaattc  
gcctaagtactcaaaaaatccgcttgagttcgatcatcagaaagcttcccattgttacggcggcctcaaaaagaacctcccctgttagaaacg  
gaagtcttatttgcaaaagcgaagcatctttggatagaattctccttctcgatcaagtttcaagacaacaagctcaacgagcttccga  
gtaaacatgagagatgagcgattgtttgacatcttgaataaacaccaaataaacctcaaaacccaacatttcatactgatccttattctctc  
cagtcagaaaaaatattttcattggggattttcagaataaatttaagaatagtaattctcaaaaaattgttaataagaaatgtcataattcttt  
atctttatttctgaagcagccatcagtaactcaattcaacatttgataaatcaggaattataagatttattggatagaagataaataacgga  
aacagtttcaccattcaaaaatgtaattattacaatagtaacagacgagtaaatgtcctcggcgggttttggcttttggacttgcattagg  
ataaaccttccgctcaggcttgacatagaagtagaattgatattgtaataagcacaataaatgaatccaataacctcgcaaaagtagaagcatt  
gatattcttggacattcaacatccaacggacgtagtggtgtcgacttgacactgaatattttcatcaatagacctagagtaaggaggagcag  
aacgaaaaactgtctgaaacgtattggtatatttctgtctggctgttactccacgaggctaacctttcatgaacgatattataagataactatcg  
agcaatataaccaactgcgaggcattgtactgttcttcatgtgggaccttactgcaatcgtataataatgaaaatcttctcattatgcttca  
tttgtgaagagatgtctagtaattgatctctgatataattatcaaaaatgcttgatgtacgtttgaaaacccaataactggctagatgagcagta  
ttcctggtatatactttctgttcttcaggaattgactaaaagatgaaagtctactgcagcagttagctgagatcaaatctagagcaaacgc  
gtaccattcaataacgattgcgttttcgagacctacttgcggtgaagaatgagttggtcggctctatgctggtttgatgttcaacgattttgtg  
gaatatgaaggacgcttctgggtggaatgcctaaattcgttctgaaacgataacaggttatcctacggacaccattgttaactgtatatta  
ctgattcatgtaaattgtctgtccatagacggcattaggaactaaaaccatggttggttatcgttgaacttcagctcactcttggatgcaataagt  
gttacttacttctgtcacctgtcttcaaaatattataatcgttaactcctagaatgtaacaaaaaaagaattgtgtgagttataccaatagttt  
aactagtcttgcattacttaattttttttcaagggaataactgaattcagcgacttcataaattgatctttatagacgtataaaaatcattaa  
gtattacaagaaaacgttagatgctttcaataataaaaacaagccaaaaatattaatcaggaataaggaataaagagttggggcggaaa  
ccttaacgaaaacgtttgtaaggctcgagcagatgaagcctactgaagtggaaaaggaaagagttatgtaaggcttaaacgaatcaggac  
aactagaaggataatgacaaagagtaataaataaaaagagaatttttaagaaaatcccgtctcaaatcaggtgcagatccaatttcttcatg



ctttcaagacatgattgaatccgccgatgatcaataagaccgtgcttttcaaaaatccgcagaattgaaggatcaacagaaacaaggtacac  
cttggtactataatTTTTGTATCTAATCAAGATTGACGAAAGGTAATAAAGCACTCGAGTCCATAGAAGAAACGCCAACCATATCGAAAACA  
TGACCTCGAGGTCTTAACACAGTGATAAGGAGTTCCACCAGGATGCATGCGTGGATGTCCATATTTTCCAATCGACTCAATCGGTCTTCTAATTGA  
CTAACATTAGCAAAAAAAGGGGTTCCAGGGATTCTGACCACAAGAACGGAAGGCGATCATCGGCATCAACAGCGAATGTATTAATCTTTGAG  
AACGACAAGAGGCGATGATCTTCAACAAAATGGCATCTTCTTCACTCAACTGTAGTCCGAAACATGATGCGAGAACGTGCCGATGCCGTATTA  
TTTGCAAAACGGTAAGACCAAGTCCAAGATAATCCAGTTTCCAAGCAAGCATTAAATGTTATGGTAGCTATTGAAAGTATAATGAGGATTTTCT  
AAAATGCATGTAGCTTACCACGATGCAATTTCAATAACACGCTGTTAATAGAGAAAGAGTAAAGAAACCACCATGCGCTAACAAAACA  
ACTTGGTACATGGGAAAAACGGCAAAATATATAGCGTTGCTAAAAGTACAATTATACCGCATGCTATAGCAGAAACCTGAGTACGAGCACCG  
GAAAGAAATGTTGCACTTGAACGCAAAATAACCACCGCATATAGGTAACCTGAAAACAGGCTTCTCCAATGTTTGTATACCTAATGACAATA  
TTCCGCGATTGACCTAATATCTGGCTTCTTGTAGTTGAAAGACCTTGATAGCGATAACTGTTTCAATAATGACAGGAATGCATGTCAAACCA  
GTTTGTAAAGATTCGTAATAAACTTCAGCTGTGTACTTCAGGAAAAGGAATTTTAGGATAGATAACCTTTGTTCACTTACCTAGAATTGGTAC  
TCCATGAACGGAATGCCAATGAAACTGTTTACTAAGCAATGCTGCTCCAGCAATATAAAACCGTATCCGGAATGGAGACGACTCTGGGAAAGC  
GCGTAGAAAGTTTTGCTTCTTAGACGAAAAGCAGTAAATAAAGTAAATCCAATAATTGAAATCACACAGGTAATCTGTGAGATTCTGAGATGT  
TGCGCAATATGAATATTACTTTTTCAATAGGAAGATCTGACTTGACAGGTTGAATGTGAGTTAATCCAAGAAATGACTGGCTTGGTTGATCATT  
AATAAGAGAAATAGATAATATGACCCACGAAGCAAGACAGGAGACACAAGGGCGTCAAGAAAACCAAGCCGAAAAGTCTGTCTGCTAAA  
GTAAAAAGCCCTGTTAAAAAGGTGATCATTCCGGTAATGAGAAATAGCCATTTTTAGGACTTTCGCTTCTGAACTATACGTTGATGGATATTAC  
CGCGATTAGCAACATATGCCGCTTCTGGACCCACACTAAGCAAGGGACTAGCCGTAATAAGCTATAAAGTATAGGACTTATGGAAGCACCC  
ATCAACGAGTAAACTGGGGGAATCCCTAAGAAATGTTGAGAGTATGTGAGAGCAATGGGAATGGAAGACATGAGTAGAACATCCGGCCAAA  
ATATCCAAAATAAAATTCGTAATGCGTAATTTGGAAGCCAATGAAAACGGGAACATAGTACTGAAGCCTTCGGAAGGCAGAAAGGCTTTGTGT  
AAGGACATTGGCTCGCTTCAAGTTGAAGATCTTCTAGCAAAGATTGATATGAAGGATTCGTTCTCAGAAGTTCATTTTGTCTAACAAAGGTGAT  
CGTAAACTGCTGGTCTGACCGTTTCCATAGCGGAGCACTGCCAAGATCCGCAAGGCAACTGAAATATAAATCTGTTAGATGTCAATGAAAG  
AAAATAACAGTTGGCATAAGCTGCTGAAATAGCTTAGATAGGACTAGAGCAGCAAGACAGTTGAAGCAATATGAGGTTCAAGATATAGGATGA  
GCAACTTTTCTTAGAAACCAATCTACTTAGATAAATGAAAGCAATGCAAACTAATAATTTGTGCTCACAACTGATGGGCTCTAGTGAGGATA  
TACTCGTTTCTAACAAATTTGGTTGATCAGATGTCCAATACCATATCATAAAGTAAAGCGAGAGTTAATCATCGCTCACCTAAGGTGATATTCTTA  
ACTGTAATATGATATCTGAAAAGAAACAAAAGAAGACATAGTGATTCTCCAGTCAAGGATCTTTGAGCATAATCTCAATGTACATGTTTGTCT  
TGAATCAAGGCTAGTGGATCTTCTGTTTCTGAGGATTGAGTATCTCAGGCGTCTGTACAACCTTTTATCAACAAAGGATCCAGATCAAGTGAAA  
GCAACGAAGTTTCAGTGATTTTCTATCCGTATTGGTCTAGTCTTCTTGTGAAAAAAATGCGTATAAGAACTGAAGCATTCTTGGCTC  
AATCACTCTACTAGTAGCTAACGAAAGGACTGCAGTGCGAACCAACGTTTGACGATAATAGATCCTGATTGGTTTTGATCTAACCGAATTTGA  
CATCGATATGAAGAGTACTTATCGTGTGTAGTCTCTTAACTGACGAAAAGCAGCTGAGGATGCGGCTCAAGTAGTAGGCTCAATGAAACA  
CATATCCGACAAAGAATATCATTCTAATAGAAGCTAATAGCAGCTGAATAGTAGATAAAGCGACCGAATCCATTATCCCTCAGCAAAATTC  
CAACAGACCAGTAAATTTGATCCAGTTCGACAAGTTTGGGACTTGACCATGATTGTTGAATTGAGCAGTTACAAAAACGACTAAAATTTT  
GTTATATTTGTCTATTACTCCATTGGAATATTGAGCAAAATTTCTGTAAGCATCATTGTCTACTCAAAGACAGTCTCATAATCCTAATCCATAAA  
ATATATGTCAAGAAATACCTTAGAGAAGGAAATGTAAGATTGGTGGTAGGGGACCTGCTTTAATACTGACTCTCATGTGAGCTGGTTAC  
TACCAGGCATTCTTAGATGCGAATGTAAGAAGAATTTGAGGAACTAGAAATGAAAGAAGTCAAGTAGTCAATTTGGTGAACCAAGGGGCTG  
GAAAACTCTTTAATTCAGCGTAAATAACAAGAAGATAATGTTACAGCTATCCAAAGGTAGGATGATTGATGACTTCTTAACTGCTCAACC  
CAATCGCTAGGTATTTCAATCATATCGATTCCGCTGATCCAGAATTAACGACAATGTTTCTTGGTACTAGTAGATACAGGTGAAGGGCAA  
AATGCGATTGCACTAAGCAGGTTGGCTAACCGTTTAAATGAATTTAGCCGGCAGTAAAGAGAATATTGGCTTCAATAAGAAAAGC  
TAATGTATATGTCTGGTATATTGACAAATTAATGAACTGTTAGCATTTTTGGCTTCGTAATTTGATCCCTGGGAATCAATGTATGCAA  
GTTCTCAGATTACTTTTTACTAATGAATATCAGGTCCTATTGTCTTATGTGCAACAAATCAGAGGACCTTGACAATCAAGGGGCTCATTCT  
ATCGAGCATGAAATGGTACCCTAATAAACGAGTCAAGAGATAGAGTCTGCACTTTGCACTGCGCTTGAATAAATAATGTGAATGAGGT  
ACTATATTTGTTCTGTATTCCGGTTTCTTAGCAGTCAACCAGAAGTAGTATTTACATATGCCGTTCTGTGTTATTTATCCCATATTCTCTTTG  
GGATACGAAAGAAAAGGTACTCGATTACCATGAGAGGTTTTTAAATAAATATAAACAATCTCAACGGCCTTATTAGAACTAAAGAGCGT  
GGCGGTTGATGCCTTAAGCCGAATATTCTGTAAGTTTCTAATCATTATTTTTGATGGAACGATTCTTAATGCTAACTAATCTAGTCTTAAGC  
GATAAGAATAATGATGACCTTCTATCGACAACAGAGCTCGCACATTTGTCTGAGAAGTGTGTTGAAAAGCAGCTCAGCGAAGCAGAAGCAAAGG  
ATATAATTTATACAGTTCAAGAAGTCTCCAAAGGGGATAGTTGACGGCCAGCTCAACCTTGTGGGTTTTAGCATATAATCAAAACCAATCG  
AGAACGGAAAACAGGAAAGTACATGGGGAATTTGAGAGCTTTCATTATACAGATAGTTTATGCTTGTGATGATTCTTACCTAAATCCAAATAG  
AAGTCGCTCGAGGTGAGAGTGTGAACCTTAGTCCAAAGGGTAACTTTATATTGATATGACATTTGCTAATCATAATTACAGGATATAGGTTCTAGT  
TGACTGTTTTATCAGTTTATCGAGATAATGACGGAGCGTTAAACGATGATGAACCTCCGACCTTTTCGGTATACACCAGGACTTCTGAAACA

tggattcattctcagtttcaaattcgaccgtacttaatgaacacgggttgtcagttataatggttggtggctcagtgaggatgattaccctattt  
gattacaaaacaacattggcgtacttggcttatctgggatttgataccgaaggtcggtgcatacaactgacgcactcaaagtcacgaagaagag  
atccattcaacatcgctcagtttccaagtatgatcgaaacgtgttttggtttgggtcggtactggttggtgaaaagtatgaattaaccttga  
atttttatattcagctaacagaaaagactcattattatctagtttcattaacaaaattccgcatcggttcccgatgatttaattccaacacagttgt  
caacagtggtgaatttcaaagcaagcaagatacttgggtgataaaagtgttagttattgtgaaacacctgtagctaaccaactagctctctgaa  
ataggcgagcaagaccttgacatacttcccgaacaaaatcattagatgcctgtgatgtgtgtgcttctgtacgattccttaacccgaatagtt  
tttctttattgccaatctttggttaaggataaaaaaacaggagtaataatataacttctgttttttagagtcgttatcctgcttcaaaaaatc  
ccttgcgtatttccgcaacgaaagcggatttagatcgcaacaacaagttagttaaatttcaaattattgttttattgttgtaacttgaatta  
gagatatccggttcagccagacgaatttacgacacagctaggccttccatctcaactcatattagttacttctgctatctggaatactttaaagatt  
tcttattcaggtaggactttgaaaagtttgtgacatgctaacataattatagattgccgaatcagctcagttccctgcttctcagtgattcaggt  
ccccgatgaaaactccaataaaattaattaccaactgggtggttgccttaacagccttgggtccttattacttccggtaggaggcagccttcttggga  
agattgtgaaacatcgcaacatggtcaaacgatagttgtattaagaaggactgctgataggcctgagacttctcaatataataaatatgccctt  
gaataaacctttctcccagttaggatgcgtgcatacactaatcatgtgctcaacaagaaaagaaaatgaaggtagataaaaacagac  
gtaaaaatgcaaatctatattagatttccaacttacagactcaaaaatacatgagttatagaaaagttttacagactattaatagaccaata  
tcaatcgttatgaattctgacttttaagttatgtagataccgttctgtaaaaagcggcattcatcaaggcttattaaaaatcctaagtaacc  
caaattgcataatctgtgtacaaatgcatctttaaattgttacagaatcaacctctgactattgtatgaaggaattgaagatgaaggaaactg  
agggggagcaggaggatccgaagcaatgcataccttgcattttagcattatcaatttaagacgacgtaatccaatcttcatgatcctttcta  
ctgacaatgtcccggcctttctatacattctcgaatgtattccagtcctgtctagcttctgtctgtgactctgggatcatagacaccaattaaa  
acacaggcagccaaactgaaaagtgatgattaaggggtgcaatggagtggaagaagcgaagaatgtagccattttcatagcggggagtt  
aaaacagcgggaaggtcgagcattttagataattcaaaaagcaccttaacatgtgtgacagccaaggtcagtaaatcattcgaccccaaaa  
catcaacgcttcacggaatcgctcaatttctgaccttaactgttgagtcagattggattttccgatcactaggatcaggagattgaaagacatc  
cgaaatgtgaccaacgattaatgcaaacgaactaactggcctggaaaactccaaggacctttgatcttggatcgaaagctttatgcaactgtc  
aggaatgaacaaaggagaacatgtggacacagagtgccatctgtctaggatgaccagaaccaccaggccctacgacataatgttcttattgcca  
tccatattctgatttgtgactgtaaggatataatgggattgtatgcaaacgcatattacaagccaaaccaacggcagcgcattccacatactct  
gaggtagcccatttctcagtaattgtcgtaggtcctcgttgatcatttccagcccaataaaatcatggtctgcaaatgtaagattctattaga  
gatatcctgacatttgcataatcaagtaagtaaaccaattgccttcataggattttatgaaagatactccgagagatgaaaacggcgggagc  
atttactaaggaataaatcgcatgtaaacacatgatcgtaaaaacttggagcttttctagtctaattttaaacgagttttgagtgatgcaaga  
ttggcaaggtagaatgtataagtagataaatctgtcaacagcttctcatccattctatgtcttctgaaagactctcgaatatttcatgtatgcat  
cgtactgtgcgttttccgagttctcagctgtgtacattgggaccagcatttaattgtagaagatcgggcttcttccgaattgatgaggggtgcgctt  
tctgtaattggttttttgaaaagcagcccaaaatttgtaaaattccaggagaattaacaggaacaggttgcatgggaatgggaggttgtag  
gacgagtttggtaatccaccgtattgagaaaccgtattaagacgagaattacaaatgaagcaatagaaggcaacggcagagatctaggatctg  
atgacagaccatttgtagtgagtgaggagatgctataggcggaggctgcatcggcttataaggcgattcagcaagaccaggatggggggatg  
agtagggttagcacgtaaattggaatctggcaataagccgttcatgtttgactgaaaaggtaggctgctaggtacgaacggttgtagacttgg  
agcagtataaatggagggtgctgaccagacgtggaagaaaaagatttaggatggtggaagccggcaacggattggctcgaggagcgggata  
ggtaggatcagattgttgaaggagggaatcgttgaaggaaactggctgagactgttgagaatgaaagggcagtgaggaggatggcttgatt  
gttggagatgcatgtagcagtaggcttgggtgctttgacagaataggttcttctcgacagggcagacagcaggtattgagtagtccataggaa  
gaactttactaggattggaatcatcaggggaggaagaattgatttaacatcgaaaggtaggatcagggagagtagaagaaggagaagcag  
cggcatctgtatcaagcggagaagcagcccggtgctattggaacgtagacgttgggtttatcttcagggttgcgtattagacctttgaccgg  
gccacgcttaattgttcttctgtatagatgattgtaaatgtgctttgagcaattgatgcaagcactgtggatccttccacatgtcacagcgaa  
tctaaattagttagagaagaataaataagaaaaaatcacaacttttttgcgacagaggtcacaagcacgagaaacctttttctcttctc  
tccgaagccgaagaagaacgcggacagaactaggacgtacagaaacctggaaatcttggggttactgttgatacaggagcgttaccggg  
cgtgggacggatggagaagaagaggactgggaagcgaagggtcgaagagatggataagggtaatcattaggacctaaaggaagggacc  
caggcgatgccgaagaaggaaggatgggatggagcagaaaaggaaggagcatgttggggagggaataggggaaagtcgatgattggaagg  
aaatttagcaggaggaacaggaagataagaaatggtattaagatccatgaattagtaaatcattaaatcaagaaaagcaaaaagtga  
aggaagcggaaataaaaacaacatcaatatctattaacggcgaatgaatggagaaccagatataaaatcgacacagaggaaggaaagcaat  
gcaatgaacggaatgaaaagggaataatacaataataaattagaagaatgataaaacaaggagaaaggatgaaaacgaatagttct  
ataagaaattagaccaaaccaggaagagtcaggaaattgtggaatgaaaaataaaactatttatacagaacgaaagcaaaacgaaaa  
ataaaagtaataaacgaagtaagtaggcgaaagaggaaaatcgatgtgatgaggaactataataacgaaaaaggcaactgagacgaa

aaaacaaaggatgcaacaagatTTTgagtaaacaAAATgatgaaccaaataaatgcacaaactaacgagaacaaacctaAAAAacaca  
ggaaaaggagctgggagaaaagggaagatgagaaaagaaggctagaaaaaaatctagatgatgaaagtatatgcggcgattcacgtg  
ttcgttctcagactagaaggatcgaattaaaaagaagaattgaacaatctaaggtttgttggtacaaattgaatccacatttctaagga  
gccgaaaaataaagtgaaaagcactaatcgcctggaatatcaattctcgtaaaaattgcgaaaaataaataacgcattcgttgcagaggaagca  
atggaacactaaataatttctcgggtgaatacaaatatcacagctgataaaaaatgcactaaactgcgatggtaacgacacctaaaggaatacag  
caactagcgaattagaagggtgttccgtattctaaaaatacgaattgaatcaattcgtataaaaaagaattcggcgcatcaagataaaaa  
tcaaaggaaaagaaggacagggttgaagataaacgaatttaaaggagtaaaggccatttgaaaaaacagtgaaccgttaagtaacatcg  
tatacgggaacatagaaaccaatgtaaggtgcaattagaaagtaagaatcagggaaactcgtagaagaaaatgaatgacaaggaagtaaag  
aataaacgaatcgaaaaagaagcagaaatcgcgtaaaaaaaaggccaaaactgtggagacgcaaaaacaaacggagaacgggtat  
gggagaaaacaaagtaacaaaggatgaagaagaaccggaagacaaactcagaggaagagaaaaggcaacactatactaaacctcggta  
cccaacaagcgtgcgtttagtaagggagtagcacaattggaggccacgtaaaagaatttaagtttagcgccaatcgttagttgcaaaccga  
gtccgtcgattacaattggaaagctggtctgacgtaaaaacttaagaatctgatgacgtaaaaaagggttagttcatatattctgatccaaact  
tgggtacactattagtaaaaaacgaagtacattatctgatgaacgacctcagaggaatcaatagaaatagctatatcaagataaaaag  
tgaaaactgagttgtaattgagttgtaattgtaattccagtcagaattcaaaatataataatgacttacttcaaaactcgttcgaaagtggt  
atccagatgtaatcagatcttagtaatgactagaagttcccttcttctcctggagaaggaaaaattaggtgagtggggaaaagatatttca  
ggagagtgtagcaaaagtattcaaaaaaaaaaaaaaaaaataatgtattcagattgaataaatcttgatattgcgaatgtttgattacgca  
ttctattatgttctatgttattcttgtagtggaatcatctcgtgttgcaatttacgattctccattcgtaaagttagtagcatgctgtaagcaa  
agcctccccgatggttagtgatgtaagaaaatcaagcaatagtggaagagctacacgagataggatttgtatcgaacttctagcctctcgaa  
gttctcaagattatcgtaactgaatagtaaagattatataagtgggacgatcctgctgttatttcgactaaattaatagatcgatacctcgt  
aatttttgcattctcttcttttttttttcttttagttcttttgcattacatcccacaatgaacatggacaacttgaagaatttagccggacagg  
cttatggtcaatacAAAagtaacataaaaatagtagtcaaggcaatggcaattctggcaacgactcttacggaaatgataattcttatgacagc  
agcaacaacaattcctatggtggtaatgacaattcttatggaatgacaactcctatggtggtgattcctacggttagtgaagcaatacaagct  
tctacggcggtaacgacgactcctatggaagcaatacaagcttctacgggtgtaatgacgactcttatggaagtaatacaagcttctctac  
ggcagtaatgacaattcttatggaatgacaactctttggaggcaacagcaattcctcatatggaggttcttatggaactcagacaacatgtatt  
aattgagtggttattaattcccttagtaataataatagcttaacaactcaagagccaaaagtctttgatcaaaactcaactcatctaaatg  
aattcggataaccactcggcaccctggatactagctctttatcaatgccttttcaaaactaggcttggtaaagataacgatcaaaagtcttctg  
ggcaaggctcggataactataagttatgcagctgtttcagcgccgttcaaaagtacttttaagaatggcgatgcgttagcaactggccaagttc  
attctgagcagcaccaacaagatttcttatccatggtggagcaagaggctcaaggggtgataatgaaaggtaactcttctcaggacaaggccag  
cgaggtgcaggcggatttgatggggatgccaagtctgctgtacaattggcgaaaacgctatttcaaaaccgtaatatgcttatgaagttggtgga  
gtctggaggctcgtctcaagctagcggtaacagtgtctgattggcaagcgttgttgctcttctcggagggttcgacttccactaactctaatcgg  
gcaacaacaatgctcctcaagctaatgcacatggattcaggacatggcacagagcttctgggtccaggaaccacggatccagtcaaaatgt  
cgtaattcgcaagcaagctctggttgggtgggttgcaaaatctagccggtagtttcttggtctggtaaaaaattccactagtgattctggaatc  
aacagcaaagtcacggcaattctcagctggattagctagtaacttataaatcggtgactggagagaatggtcaaatggaagacctcagga  
gcaatccaagcactcggaaagatggaggtggtttagtgggaaaaggctattaacatgttttgcagtaaatcgcgatttttagtctttattagtcag  
gttcttgactaaagtaacttctgttatgtacatattaggggtattaagtttgcagtagtcttttaaatgaactgactgacaatataatgaaatag  
aaatgtaaaaaacaaacaattgtaaatcaagaaaatcattagaagaggttcatgcataattctagtcgtaaatgataggaaccgtctatttac  
ttgtgagcatatttctttattacagatgattgaagtacagagttcattagcattataagtataccgagtacagctactgatgagtaaaatattaag  
gcgtaaaaatgcttggcgttttactgtatgattaagtgatgataaaaataggacaggtgatgaacaatggaatgactagaaatgacaattaga  
aaagttacaaattaagtaataaatacaaatctttaaagcggattgttgatcttcccttttggcaaatggcatagaataccaagtgtctacg  
cgaatacacgtaaaagtagaatatcgaagtttagcagcagacagtagcttactagctgctccaccaataaaaatagtaagagattgattga  
taaacacttccccgcaagctatgttaggggatcgaagctggcttttactataaccgtgaggacggtaaaaggacgaaatcaagaattc  
aagccttgccttgagattcattgataattacgtgcaaaattacttagtgaagattccattgaagttgctcaataatcgggtgaaaagttgtga  
aattgaacatctttagtaattttagtactaaaaccgcaatgtttggagccataagacatcaaatcgtaaatcttcgacttccacagtggtacga  
aatgactggacgctgacaacaaatagtgaaattatcatttgccactatagagcttatttagagcggatgaaagattgtctgaattgagaaa  
accaatgaaatcaatgaactggttttttaggctactatacatcgacaattccatgatcctcgtaaaaatagcaatgcacacttcttccattaa  
aacaggtatagaaactgacatgcatgctgaaaaatactaatgcttctctaggtggctgactgaggactgaaagtattgctctcagcttccag  
ttacaacaccggtgtaaggctacgaggatgatgaaaatagacgatatttggaaaaagctcatatcgcaaaagccaaaggcagcacgcgttct  
tgcatgggaagtcttggcgtgattgaaatggtcgaaacctacattcaagaatatctggaaattattacacaagttcgtcttgaacatggaa

gtttgttaactctaggcatgttgatgagcaacaagccaaagatctaaaggctggcttaaccgcctacaatcataatctggatacttctccc  
gagtactaccctaagattatatactactaggtcgatgacgaacgcctgaatacgaataacatccgtaaggccgaatcaaggtttgacgagg  
tggtatcttgggcttgagaaaaagaacaagatcgattggccttattcattcttggccaatatgccatctcatccgagtcggtcctattaatg  
ctctcgtccctatccccggaactcccgttggtgacatggtcaaaaaactgttggttctactcctcctcgtgagtgactgctcgtattgcat  
gccaagaccatcatccggtttctgctggcgaactcaattctgaaacagagcaagtgatggcttcatggctggccaatccgtattact  
ggcgaaaaaatgcttacaactccatccgttacctgggaccaagaacaatcaattgtttcacaatggggttccataattggaaagttcgagat  
gaagaaggggctgaggagccaaacttactctccccaaagaacggtttctcgtcgtatcatgctgaagtcttaaggctgcgagaccgaatta  
gaggctcaaggattggctgttaactcctagtttctcattcttgggttttttttttttttttttttttttttttttttttttttttttttttttt  
cttcatattctacaagtttggacaagataatgctagattaatgaattaattcgttcttttgaatcatcccttcatacgtttcgttgttccgga  
acaaactgactttcttaagcgtgtatcggctctaatcaatcttttttttagctaattacagttaaataattttccggcattgcttattctaataaaa  
cattcacttgcgtttcctcaatcctttgtttatcattaccgtaacaacaatctatcgttatattatagtaaaaatgccttgactttgttaaatattt  
tggtattacatgtattgaaaaacgtagcaaacgcgacttccatgaacaataatttttccagacgcgaacgcaatccaatgccagattggcgtt  
cgcaattgaggtaacgtaaaaaagggtaaaattgtctaaatcattaggaacattactcccagatttggattcagcacttgccttggcattgtc  
aacgactgcgaaaacaccaatgatgctcgagaagtattgaaaacgctgaaaaatgacggccaatgttgtctcatgaagatggatggaatcaat  
cccaggcaaaaggaggaagaaagtgcgatttgcacaacattagacgatgagttaaatgcagagcagaggttactattcggagaattgatag  
attgtccttatgatttggatggaacagtatacaacttttgcggtccatgttcatggtattgtccacaacgattcaatacgtctttccaaatgtg  
gaaatgatcttacgcgcagcagtgatgaattgttaaatcaggaagtactcgaaaaagatgaaggacttgaaatgctactgatgcttttttcggt  
ctccaaatgcctctcatcgttcacgacaacgtaaacgaaaaacaaaaaacctaatgcttcgcaagagccctctcgtatgcgcatctgaattca  
gaagaaatcactcagaggtgaagacgaactagtagttcacagttcaaaagcttcttttctgggaaagaaaccaacagctttttgaaaagat  
atcttcaattttgatctcgcaactctcgagtaagcattataaaaaactctggatctttatactttacggtaaacgctttgtcacaagtc  
atcctctgaagacgcaaatcttgagaaatcttgaagataatgatctgaactgtcaaggaacactggtctttcgttcaattctgttgtagctt  
ttaactgttgcaagacttgcaaggtgcaagatggattgcttatgctgtgaacaatctacccaaaagatacttccaaactagagctcggctca  
cgtgctggcaacgaaaaactcaacataagcactcttttgccttaaaagcataattgctgaaagagacaatgagacggaagcactactcgacag  
aagactgtaaccgtctggcggatgaatatttagagtgctgaaacgctgaatatgctgctccggccagggtaccggcgaagcaagatgaccg  
attgcttggcggatcagcaacataacatgctcaagttggaagagagatcatgaaaaagctatgaaatggcgaggattagcattgagatctttgg  
ttcagactggaacacccatattcattagattgcatggcgaactgttctgtaggctaaggtatcgtggaagaaaggatttcaagttggtgggcaa  
aagaagcagattcttccaaattgcatacatcctttagaattactggaattggtaatcatagcgtaggcatggaggcgagactttaccctc  
catcgtacgatggctacagcagaatggttggaggttgaagtaaatcatggtcaagtagaggttattggtgctattcgaaaaaagtaaaaag  
agcatacatcccagtggttggaaattggtcctttgttgcattgcatgcatgataaagattgtttgtttatagtaacgttaaaattcgat  
taaaatattttgagcctatttaatttgattgaaactcatcatattagaaaaatcttcatgtactataaaaaatttacaagctataactagtgcgtt  
aatgaatcattaaagcaaggaaacaaaaaggtatctaaatcagtagttaccggtagagaaaagttatgaatggaatgaagttaatgatctt  
cgggttgggtgatgctgacaatttagttcttaaaactccttgcgaagaagtttaagagactcagaaggcgatacagcagggaccactttcata  
cagataacgagaattggtcgttcaaaagggacggtctgattacgtccaaaccgttccaatgaagcatccgggagtaataagcaggagaatag  
gatccatctttattttaaagacaggattaggatgtatcgaaatgccaccagggaagtataacccttatcatatagatatacagatttctgttt  
cgtttccaacaagagctaaacaaccaatgttagtaaaatgaaagaccacagacataaataaaaacagtaactccaaacctcagagtaagt  
ccaatctaaaattggctgaactcgataaatttcggccatcctttgcggtcatttcaaaagcaacacgatgcaagccatggggatccaaccggc  
aatgccaataagattgcttggatatttgggttgcgctaggaatagcgtaaatgcctctttcataggaagggaatgctgataatgtaagacc  
gtaaaggttcttgaactctgaacgaattcatcatttcaaaaattcatcttgcgctgacgaacacaaaaggatctctgctaattttgtttggc  
catcgaaccaccgtattttcccttaagcagtatatacaaagcaacaataaaaccaggcaatcctttctcattaatgacatagcaattcgtga  
ggcctgtacaatatcgttagaaaaaagtaaaaaaagaatcaattccgtcaaacatataccttcataccataagattcgaatgataatca  
agaaattcagcagattataagcctttgctttaaaactctgttttctcggagaaggatataagataaatacttttaattttattatatacgtctt  
ctaagcctcatgaagcctttatttctgtaaagctgcgcaacaatgtaccagttccgatgcactgtgttgggttcaaaagtttacgaaaca  
aagaacacagatattttctttaaattctagcttctttaaatacacgcacaatataattatgataatttctataagtgtaattcgagaaggatg  
gaggttgggaattattatcatgagatgcaatgaggtagttagttgttctcagataaaaactttctatttcttttttttattcaatgatttttttt  
gagtagattgtaattctgttttcatatggacttatgctgcacttcttttagagaaacatctttgaataatgtggataatgagattcactaagagg  
caaagacacaccattagtttactttacaatttttagtcaaaacaaataatccaacattttccctcattttcagaaagttatcagtcacccgaa  
aaagacaagtccattttcattttctatatacatatacacttctaaattaatatacaggaaaaagctccaaataactaaccagatcacaaaaa  
cccttaagtttgaagtttatatccactgtaacttgacctaatacaagaaggaacgcaaaacaaaaggcagagtcgattcttctcgaagact

gactgaaaacaagactttcttattaaacaatcgaataccttcagcttctccagtttacgaaaggtattcccataaggccttataaatccaatcaa  
tataaatgattataacatgactcgcctattttatttttctatccatcctttgaggagtagtcaaagttgcacaacagcaatgatgaccgcataataa  
ccaaaaggggattcaagataaaactcttttattcaaatccaaataaagcatacaatgtgtgttgagataaatcgatcccataaggcttagat  
aacgcacaaaaccaatttttgcaatgttctaacagatgctgctcaaaactgcttcgattgttcatcttcagggtgctgaaaaggcaccatcagctgc  
cgatgggttctcctctgaagttgctaaagatgcagatcatcactttcttcttcttccattgaggactgtgctgcctcactgctcattcgac  
ggatcgggtgaagtagcatcgccctcggttttttacatcagctgtagcttcttctgttccgcatctgattcagcctgtctggagtcgttctgg  
tttaaggcttctgatcctccttaggctctccttaggtagattgttttagtattatcagtttctgtctccgcatctggattttctctgcgagcata  
tcttgaaccagagcctcctcgagttctctgatctttaccatcggagctaagactcatatctaaggtaacttgggttgcagcttgaatata  
tcttcaacagtttttctgaaatcaacctataactctcacgctcgcgcatctggccacacggtagcccggtcttcagcttcaggtcatcaaaagg  
attataagaacaatcatatagaatcaccacgttcgcgcaagctagggttaataccgaatccaccagctctttagataacaaaaataccgtcaccat  
caggttctttatggaactgatcaataatgtcttgacgagtttctacttgagtagatccatccaaacgaacataagaaattttaagaatccaaaac  
ttgctctagaatatcgagcatttgagtaaactggctaaagagaagtatacagatcaccttctgttccatttcaggaatcattttttagctttaggat  
tttacctgaatccatcaaggctcctctttagcatatacagattgcaatgtggggaaattgcccacagacagatgaagttcaagtcagacataat  
ttccatatctcaagatgtattgctcatttagcattttgtactgttcttctcatgatcttttagccatcttacgcaaagtgtctgatcgtaattgct  
tcggaagagtaaagcatgattggcgcccttctgcaattgcataagcgtgttccaaccgatgctggcttgcatttctcgttctctcttcttctt  
tactctcttaggtgcttctcctcagctttagttgtgagattttgcacagctgcataaccgattatagatggttctgttctggcgagacatatcgaa  
tattcaatgtgatgactcttctgaggttaagtacctaacttgagctttacgtcgcagcagtagcgaaggcgtcatcattgtttggctctactgat  
tctctgttctgataaaagagcttctcagatgcagcgtcggcagtaggcttctttaaataatgacatccaagctcctcatgtcgtatcaaacacg  
ttcggaaaggatgaaagctagcaacgataactatctttaaagattttgcagaggagtagccggttaatagtaatcgaagtttagcagtcagattc  
atcaaattttatatcgctctgacattcgattcttcaaatagtgccctctgcataaacgcaaacatcaaagttttagcttaaggaatgagcagatc  
ctcttactgctggtaggttagttagtaacaaaatgtcatatgctacatttttcttctatagcttctcgaatatcagcgcgttctctgttgg  
cttccatagtatggttctacacggagacggggacagaagcagcaagctcacgtaaccaattttagagtagaagaaggactacaacaaga  
tgaggacctgtacggccttctcaagaagcagagcaaaaaaggcaacaacctgacaggtcttgcctaaaccatttcatcggctaaaaatccag  
aaagaccatctatacagtaagttcatccaattaacaccaatcatttgtagctctttagcttaacatcaggagcaaggctagcaggttctcgg  
tgataaagccaggatagttcaggcattaaaagaggcattatgtagttaacatcaacgatgttcaattcaccataagcttcttcaattttat  
acccaggaagccataccatctgatatacgttacctaaatcttcaacggcgataaggttctcaatagcatagtaaccttccatggttccat  
gcagacattgacaatttttgaccatagggattttggtcttctcggcctctcctaccaggttactaggaacatcatcaggatgtttaatggcac  
aagctcggcaagattattgaaggacgatgttccagaagcaacttagagtgacaagttgggcagctggcagtagatccgagatttcttagcaga  
actagcattgatgaaattgagaacagttcgtccaaagctgaagtgtcttggacaactacatctgattctcgcgggaatcataaattcatcc  
tcttcaacgggttcttgcaggttctcgggagtagcagggaaattggtgtggttcttccggcagggccatgggatatcctgttgaaggttgggtata  
cttatcacgtatagaacgtttttgggaatgcacagtagcattgaaagtctcaaaatgggaataaaactggaaagatcaggaggccatgagtg  
aagcctgatgctgttgaactgagctgatacataattcaagtattgacgggacaatacagacaagcggctatttctccaatttttgtgc  
aagagcattgatcgtagtctctatgtcggcctgaggaatgaaagaacggatccattgaacacagagcatagcattgggatttttcttggatc  
ctttatagaagcgtcggcctcatgggagatgaaagggaggtatattctcaggagggtagcagaagtagttgaacggatgatgatctagga  
tgactaacggaccgagactttgagcgggtatagctaggaagcattgttctcgggagtagccgaggcagaagaattgtaaagggtagagttat  
cgacggccggcgcaactggattcagatgaattcaacaatcctccagaactgacattagacaaagcgggaacatttccatgaaattgttattgcca  
tgactgtgaattgtaattgggatagcaggttctgctgcaagactggatactggggaatcgggaaggagcattggtcattccaggagaat  
tccagtaagcgggagaagattgatcctagattgtaagaagattggttgggttaggtgaaacaggttgggaggaataaccacctgtaagca  
gcagttgaaggtgcagacggcgcaaacccataaggataattctgagtttggcatcatgtaagagctattaagctcggggtcggatcactaag  
caacgatggattggaagatgcatacgaataatattggtgaccaaagtttaggttctggaactgactatttcagcagtaggtacataaggagact  
ggggaacagtcgaaggattcactccagaacataaggatactgagaagagcttaccggtagaatgacgatgtattagcataaggagattg  
atcctccaccggatgatgcaactcaccagaaggagctgattctcctgaatttctgttctgttccgataaataatctggaagcatctattcta  
tttagttacatgaagtctttgtaacagacaaaatacaggaaatctacggttgggttttggatgtttggtggctgttgcagaagtacgcaa  
aaccaataaagcagtttagtccaattatcgaagatacacaacgactaatagtgagatataattttctcgttatttttgaacaacaaaag  
caagtaatatagctcaattcaagcagaagaaaattggaacccccaaattggagtttgaagatccatacgaatagattttattatgta  
ccaaaaaatgtttctgcgagacgaatgaacctaggaagttacttcaacatcatatccgacctgaaataaacgagaagtacaggacctctt  
ttctgttctttagaattgtgagagttattcgcgtcaagaagaaactaattcttccctttacgaaacgctccactagtaacatcaatgatttc  
ttatttctaaatgaaattgtgagctctttcagaaaaaaatcaaaagccttctcgtttaaacaacatagtatatttggccacgacagatt

gcagcgtcagtatatgtttagtctatcgagtaggagtaggaacaggaaagtaataatagagacttagagcctgttatgcttaacagctatagct  
ggatcttcaatagcagagtttgctagctgaaccaagaaacttttgcctgacataatctcagctcgctaggctgaacataccgcttataact  
cataatagaaataatcacaatgaatttccgactttctgccgtgtttacaattgagatcttcataccaatgatacttataacccgagatcggat  
cgtgacgggcacctttcagaatagattcgacataatcttctcagcagccaaatgaatgaatgggctcattaacaaagagctccaact  
tgggtggtcgaacttttatttcatagacaaattcgcataatataccacgcctccaacgaaacaaaagtcaatgaactccaagattattagg  
taggagataaataaagaatctccataaaattgaaagtatactacaaggtatcgtttgctaaaaagcctatccaagaatatcatcatatt  
aatccataaactttcaacgaatagataataatgattcaattggcgtaacattacctagagatatttcaagggttcaactttagaagcttc  
caattccatctcgaaggtagcaacgacatgggtctatgattgttttctatggtatgacagaatcaacaaaacaaaacaaaaaat  
ctttcgaactttactctgacactctggcttctgaacgcctttagtgtccatgattcactaacagcaatgtggttctcatgaacgcaacatgtcagg  
aaaaacagaagaagagaattccatccaacgtaagtataatcctttagaatcatattcgatggttgcatactggaattcttgatttaataga  
ttcctattacattggctcaggcactattttgaacatttctgttaggaagaattatcaaagggcttctattttgaaacaagaacactaactcctc  
tcccgtaaagatttgctactaacctcagatcagctgattttggtaaaatcattggatttagattgccttattcgcattactttactgacttatt  
ggactctaaagcactggtttctggatgaactttacgataattatattttggtaaaataggaaccaagctcgaaaaaactgagaagtacta  
acgattcattctttaggctacaatactctgtatgcaggaatagcagctgtgtcgttgaatgttggttttagcttctatattgctgttcattttgg  
aaaaggatgatacttccaacacctcgaaaaaacagcaataattgtaaatgcaacttgagctgctgtagcatcagctcagttcaacttttt  
aaaaggatcgtaggaatataattcacttcaaagaggaagaaagaaacttacacaagctcctactgtttctgtttccatgaccatagaagga  
ataaactttgagagaaggaaaactcaaggaatagttggatggcgtaatgtattttgaaggactagattcatctacgcttttctgattaatga  
tttctgccagaaaaagcactgattcagcagttcgtcttacaataaatccaagaattcacttttgcatgttagacgactctataaattttacg  
acggtattataaaaaatagagatttcaaaagactggtacagtttaaatgtttatgaaactaccactctgctgtatgtaagtttctaccagatgata  
aaattgagccttttctcataacagcgtggtcaggaatcatttattataattttatttcttgaataattaatcagggcataggccataaaa  
caaaaaacggtttgaggtcattcctcttgaatgaactcctttgcaaacactctgtttgaaataatgagtgaccttttcttacaatataatgtgta  
tataaataatgtttgtttattacatgaataatctgaaagttgctcaagctcgaattcaacctaactcactatcctttccttcatcacatcga  
attagcttgaccgaatttggaacataggtaaatagaatggttctgtagtttattaactaattttctttcaggtttccaatatttaagattaaact  
atatcctttggaacattagctaaaaatgtcatctgcagctgaacaggcaagattacgcagagagcgtcgcagtaggagaagatccgccaaggag  
gaaattctagaattcacagaatttgggtcaggaacctaagaagatgagcaaatgccttctcatgtctactcctgaaactgttcttccgag  
cattcagcaacttcaaagcagctcagttatgcctcggacactcagattccgaggaagataaaggatgacctagagattacataatccttg  
aattcaccttcaatttacagagcgacactccatctaatgttccccctgagaatattgctcgtgaaaaccctgattttgcaaattttccaagcctt  
atgcaatctccaaggaagatacaatggaccgtttgaaaggcccgatgacttagcaacccaatacttatgtggaaaatactcaaaacaaa  
cattgcgaaagatgtccacttactttcgtgacgctatagttgtttctgactttcgtcattggtatgtatcaaatattgggtttattgtttcgt  
atgtaagctaactgcaaaaagcctttactccttggatgtttactgttgaagcatgcttactttccatccggttgtttggacagaagaatccacc  
atcatcttcttataatgacgctggtcttcaattgccggctccttatgctctatgattagacacactacaaactatgcttctttagtatcccagttg  
attactgatgctagtagcagatttctgattggaatattgtctatataagccttcttactttaatgatgatgaatataatagtacaatgatcgg  
agtgcagggaaaaaaagcatacggtaattttgagagctgctacaaagttttacaggaaaaggaattgaactgaatcttcaataaataata  
tgttatacttttctgttttctttagtgaatcatcgcaagttacggtttagctgaattcaaatagctagctagttgtctatttaacaggtta  
gaaccatggcactttataaactattcattgcttattgctctcgattgaaaaataactgccttaagaaaatagatttctgtaaattgttttagta  
aatagtgatcaacgctctgaaatacagaatgttttccataaactaaatctaaagcatttcaactattgcctttcaataactgaaagaatctg  
aactttataaataccacttgcgactcttgaatttactccttgaatacaaaccaaccatacgaagtaattcgcatgatactgggaatgat  
aatttagcataaataattttcaaggactgtagaaaagaaaagagaaaaacaaattgaaagaagaatagcttggattatctgattcaattcag  
gattcaggttgaataacatgaaagaagcgtacgagcaattcataaggaagagatccgtaagaagtggtcctttatcagaaaaaacat  
gaagagattatgattgttctgacttgcgctaggttaagaaactctatagagaatccggttttgaagctttggatggatagctataactcct  
ggaaaacctctatgtctttttctatctttcttggaaaagttataaaagaaaattggttaattcctaagcctatgtgaatgcaactaacttg  
ttaattctagattagattataacagcatcaaatccgaacatagaagactgcagcagaaggatggatgctacaatgtttaacagggatgatca  
gtcactcaaagcattgccgttctcctagtaaattggcaacgggtccttttcaagtgtactcgaacgatgctgttttagctcattgcaacc  
agaaggaatatttttactaattaaaaattatagaatcaactagagcgacaattataggtgacttggatcatattcatttacttcaaaaag  
aattacacttggaaagcatgagattaggaacaacaaaagcttacgagcaaatgaagcataatcttcttcaaccaagcaagatcaciaa  
atatgcggaccaaggtacgtggaccctgtctactatattcatatagctgaactgtaataacttacctaactagttacatctctattgaaatctt  
ttttacggagcgttcgctgaacaatgatacaattatggacaacaagatgcatcgggtttgctatcctccaagacaacagcttggaaaccaaag  
ctaaaaacaaaatacaacaaaagctacaacattttcaaggacattacatcgacatacaggtcaaacagttcaattaagtcaaaaggtacaga

aagctattctactactcaaggcttcaacagcaaatgcctgtaggccaaccgcaaccagaacgtccatcataatggccttctactttcacctttt  
tctgaaaaccccccaagatggaccggaagacacttttggcagtcagttttatggcctggactaatgcaaaccccccaactggatt  
tacagtcctactctcagcactcagactaatcacctcgtcattggtaattctcacattaagtggagcacaagctaactaatggagtgtgg  
ttaaggaagaaaagtttcataaattgtactcctcattgtccttacccaatagggttagggtaggataaataaccaggatcgaaaggaaatc  
aattgaaatgaacaggttgagagaaataatgtttcgggaatcaacacttactttataattcggtaaagcctctccaaattggtttcagagaccg  
agaccaaagtctttcttagacaagcaaggttctttgggtagaagcttccaacactattttaagtccgaaaaccgccattttctgctata  
atgtggcttctaaaacgaggcaactttccacaatgaaagccttatgctaaattcaaggcctacaactttggaaatgccataacctattggcac  
ttagaattataaggagataagattgattcaactgcaaaaacagaccggttgatgatgagctctcacacaatcgatacaaaatctcacagat  
aatgctaagaacctctgtagagtggacatgaggttttccagtttccagtttacagagatccatgtcagaaaaacatacattatgtgataaa  
gaagcttttttctaaagcgtttgatggcacatattgaagtctgatgattaccctggcaagagtctgagacaattcatgaatgtctcttagga  
acctttctcaactatgagaaataaataaattatagttatactgcaaaattcgttcttgatgatgatgtttatacacatgcttttaaac  
atgctgtcgttaacagcgactttctcttataactttaccattttcctaattgatttctgaattggattaaatgatactctattggattcttagtt  
tgcttcaactctacgtggaatcttgataccttttagtcataatgtttcataaaagcgaataatgagattctttttatataataggcaa  
gtcttctcatalatgggaccgtctgtttctgtttcatagtctcaaatctagttaaactgaaaattacaaatcatattcaaatagtaaaagaagc  
cattacttagttaaacaagtaattgaaatctttctcaaatctacaaaggattaccgtttaggaaaagttcgccgtcgtcatttatacga  
gcttcttgaccatagtggttacctttgaaaaaaaaacaaatcaatgaatcttactgaaaactaaaggataactttcattttattgtta  
ctaaatcgttcgggatataatctgattgctacaatagactagtagtggtagaaccattaaaaacagtctgcatacaatgggtggttcttaata  
ctgaaatctcgttatggatacgaatcaaatatataatggagatctgcaggaatcaggtaaaatcaggattcgtttgtaaaat  
cgaccatattttgaccaacaatcatcactacaatccaggttattcacatacacagttcgttttgaacatgaaacagatgttcagaaactgg  
acaaggcatggggcctgacctgtcctgtcggaggctgtcctcaatttcaaaaaaggttacagtacatggaaatagagcagcattggatagag  
aatctcccccaagataaaagatggaaatataatcaagaagacatgcaaaacataacatccttgcaagaatgatttctcctaacgttct  
catttctgtacgattccaatgttgatagttcaaatgtcaacgaaacgaaatgaaatgacggcgtaaggattcgggtttattagatactt  
cccagaccaggaatgtcttgatactccggtatcacaatggaagatcagtcagctgaaactccttcaagaaccttactatttacagaaaa  
agaggcgaccgaaaaactggtattatagcgaagaaaaatacaccgggagatcttctttgggtggatcattgtcaatttcggatcatgctc  
tataggcatgctgtaactgctcagattggcagccgaccaatctgaaagattcgttggggaatgatgaacgctgacttagttattgcaatctt  
gggtcgttcttagaggctttacggctcaactctgaaaaacaagacgttactaataatgctggaatgtaagaaagtgtatacagattgaca  
ttaagcggtagtaacaagacagcattcgggatcctattttgatgctcgtttttaaaggactatcgaattgttaatgattatggctccaacaa  
accataattcaagaaaccaacagccctgtaactaacgctaaagtggagtgaaccgatacacaatagcggctggatccgctgatggctgtgtgt  
attgtatgattctttagaacgttcaactgtatacttagtcgagacttttctcgtattttggaaatgaaatgatttctgtagatactttgtcactgctg  
atgcagatgggaatgaaaatgttactgttcggagcatgaatccgattttaaagttttaaaggcacatgaagctccattttgctttgattatc  
atccacacttctgttataatcttctcaagcgtgctaccgtaaaggtagctgtatataaaaaaaaaattgctaatttttagttatggcac  
agtcgaactctgaatcattgagtcagtcatactttccctttcaattctcctattgaatgtattagttggaacgtaggaagtggtctcctattttg  
gaattgcttcaatagcattgtcagttatataacgccatttctgtgcaacaactcctgtgtatgaggcatgctccttattacttgcatttctt  
tagcaataatggacgattgttgcaacgggtgactcaatcggaaagtctttgatatgggactgtaaattaagtaagtagtacaagaactggtcc  
caaagattcctcattagctactcttacagatagcaatccgaggaacagatcaattttgaagtgagctctgatgatacgcatttaattatgga  
aaacaaaaacaggagcttaatatctgtgcaactgttgacaaggatttgagaataatggattaatgaaatctcatcgttatgtcttagaaacat  
taaagttttatctgtaaaatgtatcatattgaatcctcattataatttcataaactaataaacataatgctcctttcgaacatcattat  
aaatatacaaaacagtagaagtagaatttaagaggtgttcattaactggcgaatggagagaaaatgttggttcttgaagaataatgt  
tgaaccttagcatttctgtcacaatctcaaccattttcgaatgggtgtccggtcaagatcagtcctgtgtagaagaatcattcaactaacga  
taatggagcatccaataagattcttcagaagatgaaataatctgcaacactcccaatccgcatctagcatgccgaggagtaactttctatg  
ggtcaaaggtggcttttaggtgctcagcagccatattcaccaaatgcacgaatagcaagagcagatcagatcgtattgtgaatagcactt  
ggacctcgaatgtaactcctttgtataaattccacgaagataattgatcgtgagtgcttggaaagattcaagcaagaaaacatcaaataggcc  
aggtagcatatgttctatgcaatcccaatgtagtctctaaatgtagcaaatcagcttcatattgtcggattgatacctcagggtggaataaa  
gtagcaagagcaggtttcacatcgttgaattttcaacgatttattcacaccaatcgcctaagtaaaatgaaacctactgttttaccga  
aagactcacgaaggtcttctcgcgactatccgtcgaactcaaatgtacgtagaagcgtattgtccatgaaacctgcacattaaaggtgtcatt  
agctaaagctaagaggtattccattagctccggaggagcattgaagcatccgacagatgtttctgaagttctgttttcatcacagttttcaatgc  
tcttgatcgcctgattacatacataatggaccgtaaacagactaacaaccttgggttattcgtttgtgagattatggtgactgttgagtaat  
catttgaagaagataatagttccctgaataaccgtaattaccgtcactgtcaagctcgggttcaactcagcctaacgaaagcctgcagcactt

tggaataacttatctgaccattcttgattttctgagtaaagagccgggtatattctttaccaatataaccattacttccatcttcaagaggaggttg  
aagctcatctatggaaaaatggagcatgttcttgataaaatgtacggactctttgtgaaaattgattagattcaaaaaggtagcagcagggtatc  
agaagagacagcatctttacaaggtttacgagacattgctgatagataatagcaaactttggcaatatcgaaggatggagaagcaagctct  
ggaagaactttgaatgcataatgcaaatcgtctaataccaatccaattcaaggctggcttctgagttaagaaattgaccaagcttgatgaaac  
cgttctgcaattgatacttgaaaatttcttgcttctgacaaaagtccgaagctgacgcgagctgccttgaagattcacgaatggagcttcat  
tagcatcgtaagattagattgagcatttctaagctcttagcatttctgctgaagcttctcggcttctgatgatttaaacactcggacaattgtct  
cgtattcccaatccttaaaagtcaagtaaattcctgcaatagttaaatcaatcgatcaaacttctcagaaagagcattcaaatgaaaaaga  
cgattgcagggtgtagacacgtcgttctactttctaataagcttggctgcatggcttcatctcgaagaacagcttagagagttaaagtc  
gctttgagcaaatcggcatagtggtatcctgctccaggctctcgaatcatatcttcaatgatgtcggttctgcatcagattccgaagctgat  
aatcatttggcagtagcataacaattttgtaatacagaaaacttactaatgagagaaattgcttaccatctcatgagctgcatgcataa  
ggatcgcatctaaagaaaccctagtcagtaaaccggtatatacgaatgaacaaggaacaaacaatgatctgttcttcaagcaatttattat  
caaatgcccatttagcaagacagactatttagtgaccgtacatgatttagttcgcgaagtaactttggcgtttagatgagaatctgaagag  
aaagccttcttctgaaacaaattagacataaagttctgtaataaagcagactggatactcgaagctctcgtatgctttcaagctccgtt  
taacgtgcaagtaaacgtatcttttctgcttcaacttctcgcacatgggacgaaaagcttataaaagtctaaacagctgttagtcgatttctg  
actttctttcaaattcgagtattacctcgtctgctgcaggatcggctactttaaagtttggtaatacgaatgaatcaccgtacagaa  
agagtatctgttcaatagaaaacatactattataaacaagttcatcagaagaagccaaagacatttgcattataaaacaagaagtcgcttgt  
ttatgttggactctggagtgtgctgcatttaacaactactgcaaaccggttaattggatatacggacttggaaactatcgagaaaggtcaa  
caaacgaggaatggaaactaaacaaggagcttgtgcaaatgttttaaggttacaagattattatccttcttattgttcaacaagctccc  
tataggttcaaggttggcttctcgtgattcagctgagctgaaaaagctgaacgagctcagctcaaaaggttcaatgaagcaatcaat  
ggttaaaagagacgcaaaaaattagcgaccaaatttctactatctcatagttactgatgagctgaaacaggttggtaagacataaagtc  
aatcgttacttattctacggttgttactacggatgcatatattctctattaagttccgttccaatctctatttggaaaaatgaaaatgt  
ttttttgatattatggatgataaaagagaattgatattaatttgaattcttttaataatgactgttcagttccttcttattcagaaattct  
ggttagaccgcggttattcttctcgtccatcacactctcgaagtagtactaatagccgaatcctaaggaactaccaactacgagatcc  
ctaaaatgatgaaaagtgtgagctattggaagctaatgacatcgaatttaggaatgacccgaaagattgagctcaaaaagctcacaagc  
gtgatgaagcgttggaaactgggtacgaagccagagttcgtaaatattgatgagtagtactcagttgaaattcgtctactttgactagat  
gctcaaaagactctactgtcttgttcttgcagttgtctgtggtgatagaactggtttcaatttgcacttagatcctaagcttctgggg  
cccttctcaaatttggattcctattgctctatcctggactgaagaaggaccctaaactgatttctgggcaaatgacttctggtagggtgctata  
agcggccgaacgagattggacggcgcaattcgtatgaaatcgttctgggttcttccatagggaaaattgtttatgcttcttgggaattctta  
ctgactgtttagcttcttcttattctgcttcttctgcttcttctgcttcttctgcttcttctgcttcttctgcttcttctgcttcttctg  
tttagctaattagttctatcattagatggtaagccctagaaattatctttgatgggctgctcagcttcaattgaccgtacaaagtgccaagg  
gtccggttcaaaaatttggtagtatgattgttgagatcttgcagaaattgcatgaaataaaaagaaaacatacctaacttataattta  
gtgaaacggtgacaaaagcgttctcctaaatgttctgaaggctgtaagaaggaaaatactcctaaggattaaatttaaattttttat  
ttcatgctcccttctaatcgtataaaattttaaaggataagtaagaattgtatgttaggattcatatgatctggttctacgatttcttattg  
agagatgagtcgaagttactatattctatgattttagaatagttcgggatactttttcattcttcttcttctgctggttctgcatcatagattaggct  
ataactgcatgtttttaataaagaaaatcagatatttctcgtcaagagtagtgcgtgctgactgttttttttttttcttctagtaag  
tagtacatttctggataaaacccatccaactttgttctgtaaaaaatccagtacactacagagaaatgatccatctactcacaagttaaag  
tcaaaaaagatacaaaaatcgaatcgaattgaaattgagaatttagattctgttattaagtcattatttgaattaaaaacagattcaatg  
taagatgagagaaattagccatgataggagagagctaggcttagtagcaaaaagacagcaaaaaagaaagaaagcaaacagatagat  
acagaattagtagtttaattatcatagaaaaaaggtaatattatcgaataacaaaaccttgaagttcagcttctcatttctgcaagaagg  
catcttttggattttccacaggtcatctctggatatacgaatggcagtttgaggctgctagtaaaaattcaagcggagaagcaaataga  
aggatcatcgaagagccactatttagtattccacatgttctcctcaaatgtcaatgttcttcttctgacacagctgagcattggatcttcttctg  
gttttcaaaagctcttccagaatggaaaagttctttcaatcagaacttagtagctgagtaaatcttcatctcactatccatggaaaaccaat  
caatattgatattatctcatgcttcttctatagtgcttgtttgtacgaccagcatctttatgagccgtacatgatattgaagaagcagatcag  
gaaagctgtatttggcgaagtggaagattgcaaatatgacgatttgttctgctgctgattactgtcatggatacaggagattcatagcgtcag  
gtcaaacatgtcaagcgaacttcttcttggattttcatcttctgtactatgtcaataacccagtggggatgcaaaaattcttctgtagta  
tgctcagtggtatgctgttctcgcgacgagcagatataattgtcaggacaataatagtcgaaacaacttatgaaaatagatctcgttctgca  
agattgaaaaggggcttcttgaataggtatacagctgtacggaaggcctcagcttgaatacttatcatttcaagattcaagcttctg  
tatgttcagttgaaacagaaaagcttctgcttctgagcatgctcagcttggattgtatggtaggacgattataagagacttggagatcggagctat



gttgtgaattatattaattgagtaaggatagaagacgatagtaaacacaaaaagtagggcgagattaggcaaaaaatatattagagcagggc  
caagaatattgatggaaaaactagagaaaaactcccaaatatatacgagcgcatgaatgatcaagtcatttcattgatgcttctgaaatcaa  
atggacaaggtgtttcgagaagttgtctaattaaagctggacatgtaatgaaaccatattctcccctcttattttgatccagccacctgactatt  
agcacttttgccaatgcaactgctaaatgatgcgtattcacccttttgctaaactgaataagctttccccaatgatccctcaaccttagcattt  
caaattacagagcaatgaggtgtctagtggtgaatggtagaacaattaagatgatgaacgcgaaatTTTTTTTggaattgatcgtctttgtaat  
gagcatgtgataagaattaactctcataaattcaaatgaatcatatcacgcctttgtacacaaacgatgagatctcctttgtttgtttgattga  
cattagcgactcatgccccaaactctaaactaaactaatttagggatccatattgattggataatgacgtacacacataaattaaggtcatgtaacct  
tgctcgacaaaaagttaattgaataaaagtgagtaaatgcgacaagcagtagctcacggatattgcacacaaactcgtttacggcagggcgtatt  
accgatctcattattgcagattgtttgtgatcttcgatcataactgaaatggagatgaagaaaggcagtgaggttaattagtagatacaagcaa  
tatatagttacatagataagtagaattctttgagaattctaaactagttttgccttcgacagtttaaatcaacccacttagtagacacgaaaac  
atcgttctctcaaacctttcaagctttgtctatcccatattaattctctttttacgcttcagcaaaaccattgaccagttatccaactttgaaaa  
actgaatacataagggattatcgaaatagcgtctcattaattgtttatttcggctgtttgttaaaaaaaaaagaatccttccctccacgataaac  
ttcggtaaacatcaatatacatgtaattgggtgcctttgtttgtttacattgaaggtttgtatataagcaatcgttatctaccaattggcatctaa  
ggatattatccaaagcagcattaataaatccgtcgcacttcttattccttaagtcaaatattatctataaaaaatcagtggtttattttccta  
gtgggacttttactcaatatctcaagatgggaaaaacaatcacaactttgatgttggtcttcgtgtccatggccggttgaggttcggtgctgaca  
caggttccatcgccggtattacaaatagagagattccagtcagttacgcagatcggtatgatccggttccaatacatattcatattctcagc  
ccgtcaaggtctttgggtggtatggtaaacgctcgttacaacaatcggtgtttacttcttctcctttggctgatcgtttggtaaaaaaatgcat  
catgggtgggctctggtttacattaccggtatcattgttcaactcaccacggctccttctgggtccaattcatggctgcaaaaattggactggct  
tggtattgggtcttctgtcattgccctggataaccagtctgagctcctcccaaaatcgtggttctattgtaaccacttaccacttttcatt  
actttaggtattttcattgctgctgtatcaacattggcacacaaaagcgtcatgcaactgctcaatggcgatcccaatcggaattaattgtgtg  
gggtatattgatgttttcggatgattttctaaagaatctccacgcttctggcaactagaggcgcaacgaagaatgtatgcagatcttatgct  
gtaactctggacttactctgaccatccttaatgcagaaagagtataatgctatccaagctgatgtggaagctgaaacagcaggtggtccctgta  
gatggatagaaatTTTcaaatccagtcgctaccgtacatttctgggcatggcagttatggcttccaacaactactggttaacaactacttctc  
tactatggactcaaggttccgtggcaccggtttaaactctccttctggctgcttattctgacgcgctcaatTTTggctgcacctcgggtgcta  
tttctgttctgagtactttggagctgctatgctctgattattgggtggtttggcagtcatttcttttcatctacgctcctggtgctgctgct  
tgtaccgccaaacgggacctcaatcatcgatgtggagccgttatgattgtctttctgtcttcttatttctctttgctcaaacctgggcccctgct  
gcttacgttattgttggtgagctgatccattcgttaccgttccaaatgcgctggcgtagctacggcaagcaattggTTTTTaaacttttgattcct  
TTTTTaaaccattcattagcaactctattggcttcaaatcgggtatgttttgcgtcttgaactggcggctgcatgatttttctctttgccaag  
gaaactaaggtcttacgttggaaagaaatcaaccagttatacatgtcttccattaagccttggcaaaagtggttctataagcgtaatcgtgaagag  
gtgataaaagtgaaatggaaaaacctcgtggaccaagagctcaatttaataacgctcagcatggaccaacatttattctgtgagaattc  
agtgacaagccggcagaaccacctgagcaggttacgaatcctgttggcttcttgagactaattttgatgaggcaagaccttattcttttctg  
ttctttgggttacttggtaaagctattcagattcggactagggtaaagatgtaaaaaccaaggtgtgcatgaaaaccttaaatagatgcatacct  
ctttttgttcagatTTTaaacctaaactagctcctgagcaaaaatagctcctttgtttatagtataattggattttctcataagaaagtaaaggt  
ccgatagtaacgcacaaagtatatttctaaagaaacttctcagtaaaataaatagcttagacgtggaagggccatatttcatggaggtgtaa  
aatatgaacctgcatgatattgtaaatgtcaaaagcaacctaatattatacgaatcataataactaaagagattgtcgtgaaggcgtca  
catgggatgaagacaaaataaataaacatttgaaatacaaaagagcgtatatacaattgctaattgattggaatatcgccttatctatag  
attaggctagattttgagcaactaaaagtagtcaactactcccagacagaatctttggttgataaaatgttatatcaggaagtaataagaaaac  
aaaaaagaagtgcaagggataattcctattaatttgtaaagtaacagtgctataattgagtaattgattacaaaaatagtatatgaataaa  
gggcttatagctgtatctggttattactgactgtaaagctcctttggaggaaagtgctattgttgcatttattcttctcagtggttaagaaaatgtta  
tgccatgattaataaccaacaatcactccaattctattgtcaaaaagaaaaataatagaaataccatctatatttctgttaataatatta  
ttgtaccctaatacttctcatgcaaaccttgcctaacttataacgaatagctcgtatattttctgactagaaccacttcaaaaatacaaga  
tgaaatataaaaacgaaaacaatagcttttcaatttctgcaaccaaggaattattgaattgctagaaaagcttccgatgatttttattactttt  
tcttacaacagtagaacggaagttaccctttttccctttatttctgtgaaaccaagcctcaacccctcactgggagattgtcaaccaatc  
ataaatctgcgaaaactcccaaatcttattttccaggtgtctgttttctcgtattacccaacattatctaagagttgattggctaattg  
gagaaatttctgtagagtgctggcgaagcttaacttttggaaaacacgtggaatagggtcgtcatcaatgggagttttaggctgggtgcg  
aacgagccttttaattttgcttcaatttttaaatcaacgctttattagcttctgaaaagtaaatataaaaatattgagtaagtagcacaaac  
ctttctcattcaatataaaccttagtaactccttctgtttgcgggattacggcttgcattcgtactgtccataatgatccctgtttactcgcactt  
taattagattacagttaaacgtacctggcagagttttgttattggccaattgtaagttgcagctcgtcatgggtgatttgattggaagcaatccc

ttttccctacgtcgtcaagcgtctcgtttgccaaatccaaaaaggccatattggactttttggactatataaacagtagtaattcgtccgtttc  
agcatcatttaactaacaacaacatccctaagcattttctaccctataattttacgaggatctgcgctttctagggatccggttctttcaattgcga  
tatatacttattgaactatcaatcagttctttggtcctagtctattctttcttaaactgccaattcattttattcttttaaccttctttttc  
ctttttctttgtcttcaaagctttttgtgtaaaccattttgacagtagtttcacaatggcaaggatactaacaattgtatgttggcttcgtgt  
ccatggccggatggatgttcggtgccacacaggtccatcggtggtatcaaaatcgcgactccaatcacgatagccgacaaatgac  
aaggatacacatacttactctatagttctgcacgtcaaggctcttgaccggatggatcaacattggatccatgaccggctgattctctctccc  
atgtccgatcgtctcggtaaacgtaactctattctctttcacctgtgtctacctcataggtatcattgttcaactcaccaggtccctcttgggtcc  
aattcatggtcgcaaaaatgtggactggtcttggattggtgctttgtcagtactagctcctggtaccaatctgaggtgcacctgctgcgatgct  
ggtgccattgtcactactaccaattttcataccgcccgtattttcattgctgcttgcacatgggactcacagactcggaagagcgcttc  
ttggcgtgtcccatcggtattaacctactttggggtcttattactttagttggcattctttctacccgaatcccctcttacttgattctgtcggca  
gagatgaagaagcttgagtattgtgcaaaaataacgacctctcttgaacacgaagtattcaaacagagtagcatatgattaagtcggact  
gcgacgctgaattggctggcggccctgtaagtgccagagatttcaacaaaaatattcgtaccgtacttcttggatcggtgtcatgtctctt  
cagcaacttactggaacaactattcttactatggtactcaagtttcgaggactggtatgacttctcttacctgtcagcgttgattcttgac  
gctgtcaactttgctgcacctttggagctcttattgtatggaacactttggtcgccgtatgctttaataattggtgactctggcaatcatttgc  
tcttcatctatcgcgctgttgagatcgttcttctgattcttctgaagcttcttaaccaccgggctggtgctgttatgattgcttttcttcttcta  
ttttgcttctcaaacctgggccccgggtgcatatgttatcgttggtagtcttaccctattcgttatcgttccaagtgctgctgtagcaactac  
tggaattggtttgggattcttgattcttcttactccctcatcactaataactattggttttaagtaggtactcttctgcttgaactgtg  
tggtgctattgtcatcttgccttctcacgaaaccaaggcttaccctcgaagagatcaacctctttatattctggtcgaagccctggatgcc  
ccgtccaagagcttgacaattactctggtccccacaaggatccttggagagaggcaagcatgatgaaatcgaccacattgagaactttacttc  
tgacagtaggaaaatacttcatcttctcattcgaaacccaaggcgaagttttgacctattcaggcagtttaaagtagcaaaaacattccaaga  
gtcttcatggcactcatgttgggtcttattcaattctctttagacatgcatgccgagtttttattcaagccacttattgttcttacccttaaagc  
ccacagtcattcttattgaatggttcaaatgtgttctcacaatttatgagttatgacattcaataatcgatggatggatcttgtttcattc  
aaaacctactaaatagcatcgacttggcattaccttattatgaaaaatagactatgactcaaaaggaatcgatggaaaaacccttgatatt  
accaaacatatctgcaagaattatagaatgaacttaactaattagaagttgatgaacgaagcaattaatgctcgtttataaacaattcccataa  
tggaacaggaaagaacctcatgcttaattcttcttaccctttaagcacttatgtttattattaacggaccttttgcacatgatttgttattgag  
tttcaacaaaacaatagcaaatgagtaacatgacattccaacaacgaatattatagatgagtagcgaattgatctagtagactgtagtaca  
aagatagcaactgaagccatagattaaaatatcaaaaatgcaaaaatgctccagcagtagctcgaacactgggctcttcttactaggcaa  
gcgcttaccactgagctacaagagtaactgaaatctttagaacttaaaaaacaagtagaggttggtagactttttgtttgatataccat  
atcactgatgatttattacgaaaatatttagaaagcaaaaataaaagtaaaattggtatcgatgccaatgaaaggcaaaaacaagggtcagat  
tgttgcaattcaaaaagtataactaacgaggtattatgatgacaagagtaaaactgaattctattacataaaaagatcctccactaacac  
attgtttaccgtccgttgattcaattgaaggtcaacattgtaaggaccttgaatgtgcatatcgtcaaaaagaaactaaaccgaagactcta  
taccgggaatttagagtccaccagtcattccgaaacacaagaaatcgatgtgtctcgttctgagactttagccgtttcttcatagtgtc  
agcttgacgcttactgcatcttggttacaatattatggatgttttaccgatagggctgtaagtaaaaaaacagtgattcatggcatagtgga  
catttaagtttggagtaggggattggaattgcatttccatgttagctgccatactgtttttcactggattatgtaacgcttgagcacaagaaa  
ggtaccaagcatgttctgtaattgttatttgggtacgctgatattaactctacagattcttttggatataataggatggctagatagcagcagc  
tttcacgacatcaaggatcgtcaaaagtcaaggttaagaggagctgctcttactggttttgcattatttccctattcgttccaaaaacag  
cgaatctgacccaaagaaaaattatatttgcgctaccatcctcacgggattcttccctaggagccttcggcggcttcgcaacacagggtatgtt  
ataacatggaatcgtattcttctggtctctaatctaacctttatcactcaggtgctggattcagcaagctatttccggcataaacacttcagta  
ttgacgctgaattctaattttatgtacctgtatctgtgactatttactcgtttgaacgttaagtctgtttcaagaagtcttgtgtaaatatttgc  
cagaaatcctggcgacagcgttattgttaattgggggagcacaggaatcgctgttatccgcccctggcaaaaataattggtattgaagaaga  
gattgggattgtcaaatggcctttttgacagggtcgagttgggtccttcttcttcttggatctggtatgttttttttagtttcaacaat  
tgaaactgactggttagacatttgcagcaagtggaacaacatcctcaactcgcatctatagattcaagaaattgtaaaaaagtagccg  
gtttactatcccctttctatggtcgaggactattgaacaagacatttggccttatgcttggagaaagcctatcaataattgtagcggagaacc  
atcgacttccaagaagtcggaccccaagcaagagctctatgaagctcaagaggatattcgcgctttaggggaatttgaacaatta  
caagatgtattgtccagaagagttaaagattacatttggctgcttaaatgtcatcttccaggtttctcataattctttttcagcctttcagg  
tcttttcaactttctacataattatattcttccccttttaaatgttactcttgttaattggccttttcttatttccataaagttgtcactata  
cttactgtttctttatataataacttcttacttaactcactatgcttacaacttctctcttctcgaatacataagaattcaaacatgct  
ctcgaattttcttcccgttgatgtatgaaacagaactgctattttgataaaagatgttcaagacgagcctttagggcgccaagtaggcttctta

cgatgccaaatagactcgctttagaataaccaatcttctcaaaactaattaccagaaacagccttattcatgttgctttaactacaagttgtcct  
gtaattaggataggatggctgtaaagtagaaaaactacggcgatactggtaacaatagttataaagaagaaggtaaactcactgaattatt  
gtgttattcattgctttctaataaacccctataatgttctgttagttatataatgtcattgttgattaatgcaagtttgcttactcttaaaa  
attctttcaaaaaccgtgttattatgactaatgttattacgaaattgagtgaaagtgcaaaaaagaagttgcagcagaagaaaaga  
tcaacttgaaaaatggctattaaagttgaattactgtatgttaaatgctgattcattctttattgacgggggaattgcagtgaggattagacat  
gctcttaggaagcaaaaaggagctctttggagcttgagaactaggagaagtaagacattaagatccttgatccattttatggctgaaaaaat  
tgaagcccgactcaaaaaggaaacttttacctggatggcacgggtgatgttcgattatggtacctttatgcttctgtgatgctaacgaaatgact  
agtctgctgttattatcgtctggtgaatgatcaggactgggagctcttgacaagaggattataatctgaagacaaggatcaagttgttttg  
tgtctactttacatggatgcttgggtttactttcgctaaaacgaatgtaacggtaacattaggaggtaactcaatgaaaaactaaatctagggt  
agctgacttatatacaaaaaacaaaataccaaggagattctatacagcagaataggctgtaacgtgttctacgtagtgttttgagataag  
cgattgtagcgaaccaacgacactgtaacttaagtagtaattttactgaaacaaaaataatcataataacagtatacataaagcaga  
caaggatgaacagagccattaagggaacggatctagtagttttacatagacattactcttctcatcttcagaatcaacgtggatcgtccgcg  
tccgacgtgacggttttgggatggagcagctgaagcagcataagaagaaaaggaatcggtgacatcttctgcaacatcaaatctattttcattc  
ttccaaggcagcattcaaatgtggcccaaatgaggcatttcttctcatcaacgtcttcttcatcatcgtcaattaacattgatgctgatctaggtc  
gagaatgtcgactcttttaagggcgatccccttctgttagtatccatgtcttggtaacgtcttctcatatacaaatcatacagctccctag  
ctaactcttatttttctatttcaagctcttctgtctgtagtcttgattgaagcctcaccatcactccagaccttgcagctgagatgccaagttg  
ggttcatctacttctctgctggaacaataaaatcatcctcattgttctcaataggggacaactggctcgattgagattcaatgaattcatcatc  
caagtataatcaccgcaccagaaaaatcagattctgcttcttccaatctatccagctcttctggaacagctgtaacggcgtctccgcgaa  
agatttggccttctgggtcttcttctcactgctccacttcaagatcttattatcccagaaccattccgggtcggagtcggcctcatccgaaatc  
tgaaccacaatggtcacaatggaaggattttccaatcccagtgggcagcgtgacacctaagactccatcttctgcatcctggagaatgcc  
gtagggtagacagggctggtagccttggaaatattccatcaaaacaaactcttctgctgcttttgatggatcgtccctgatcttagcaatgataagg  
tcggatctacactagcaatcacgcccataagtcatagacaagatacctggagatggtgggtatgaatctttgacgacaagtgaggacatgat  
ttcattctttaaccagcttttagactacataatcccattagccactgtttatattatagaagcagaattgatcggctgttctgtaaacagca  
atccaaacacttctctccaatccatgacttacctcgtacaataagtagtccgcagcagctagtaaaaggctttgaggtttctgtgcatat  
aggacaatctattgttttttagtttgccaaaaatgagggttaattccgctttgacggcatctgaattgttctttatgcatttttgaaataaat  
ccatgatccgttttcttcttcttctctctgcttttctgttgagcaatgttgaatcgtttactgcttctgctgacttccgagctctttccacatc  
tttccatgaaacaacaattcagaatcgctctctttattaccatcacctttataaaagacagttctcactcctactttgtgtttacaaactgacc  
aatcctattcaagtaataaacccctttctcagcgtcgatggaagccggtaaaagtaactcaatgtcttctatacctactcaaatgcttctgctctt  
tctaccacgtttcttccaatagcgatctgttgacgttgaactaaaatcgacaattcttctcatgataagttttatgtgccaccgaaaaatcct  
ttaacgttacggtttggagcttatataaaagattatcgatatttagcagctctttataagctccaacaattcaaggattatagcgttaagtatt  
tattactatacaaaactcggctcgataaaactaattataactttaaggaataactataaatttcttctggtttacggctgatgattactattcaa  
aatacgtattttacgatcgacaaggttctcattaaatgacttttatttctgctgattcaatccattaaccattcaaaaagaatgcaaaaa  
atctatgaatcgattttccggttaagttcattcgaacgagatcaattaacaaggaaacataaaatcgcaaatagtatctgagcgtttgtac  
aataataagttttgagttacatgcaaggtttgatgagcaagaattaagggcatgatgaaggagaaatgagaacagcaagaaacataatgaac  
attttcagaaaaggggtgatcattatgaatgaattaagcataacgatccggttgatcaaggtgagctgcttcatgcttgtgatggagagtagg  
gctgtttctgttagagctttcagcgtctcattagaagttgggcatgttcaacgaattgtgagctttctcctgaacaccagagacttccaaag  
cctcttttggtgtcgggactgaccaatgttcttgggacggggcatccaaggttgaaccggaagtgaacagagattgatttctccaaggt  
aagacccttggtctgtgagcaaaagaaaatgataatggcaccacataagttgcaagaagcgaagatatagccgtattgaaagcaattgag  
ttagtatgaatggagtaaaaggaagaaatcaaaaagtccaatccagttaccagaggtggctaaggcagcgcattggaacgataacgaatg  
ggatacactcaccgacaataacgtatgcagcagggcccaagttgagcaaaagagaaaatgaagagacaagaaaagacaatcataacgg  
ctccacatcgatgatcagaggttccatcagaacggtaacaggcacgatcaccaacggcagcatagatgaaaaagcaattgactgcaaaacac  
cacctataatcagaggttacgacgacaaaagtactcaagaacgaaaatagcaccaaaggtgcaacaaaattgacggcgtcaagaattaa  
gcagccaagaaaggagattcatacagtagcgggaacacttgagtacatagtagaagtagtagttaccagtaagttgtgaatagaca  
taacggcaataccaaggaagtgcggtgacggatttcttatacaaaaacttggggccaagtgcaagggccgacccaactccgcttgcagtc  
cgacttaatcatatggtattcagcttgaataatttcatgttcaagaggaaggtcattattttgcacataacactcaagcttcttctctgcccac  
agaaatcaataacgagggattcgggtaggaaaagaatgcaatcaaaagtaataagaccacagtagttaataccataggaatgcgcca  
ttgagctgtagtatgggtttatactgtgagtgccatgttgatgcaagcagcagatgaaaatccggcgggtgatgaaaagttggttaagtagtac  
aatggcaccacgcatcgcagcaggtgcaacttcagattggttaaccaggtgcaatgacagacaaagcaccataccaagaccagtcagatctt

gcgaccataattggaccaagaaggaacggcagtcacttgaataatgacaccaattatgtaaattatagaccatacgaataatgaggtacgtt  
accgatacgcagcgaagaagaagaatacatccagtaaaggaaccgacgtttaccataccagttaacaaaccttgacgagccgaag  
agtacgaatatgtatctgtatctgtcatattgtcggcgaacgttttggagtcgcgcataattgtgataccaccgatggaacctgtgcggca  
ccgaacatccatccggccatggacacgaagaccaatacaattgtcaggatctttgccatctgtaaataactaatatgatatacaaaagga  
taaggagagtaagaaatgggataaaaaataaaagtcgaatcgaccaagaagatattaagagaaattaaggagaaactgaaaagggatt  
aggagcacaatcgttctactgacgaattaaagcaaaaatattatgaatctgagaagaacttaaaaaattaagttaaaaatctcgggcaagaa  
agctcaaattaagagttacagagaaaggaaataggaaagagaatgacaagagctgtatccaattgttctccaaaaagttcgagttcaac  
aaagttagatatattgaatgtttaattgctgaagaatccataaccaagaacctcatatatatagtaaaaaataaaggaaaacttctacgggg  
cggagtcggggaaaatcgggagattatctggagactatgcaatgcatattttccgaacgtggggggcaaaaaacaaatactttgacaaatag  
atggtcgaaagagaacgttttcagtaactgttactataaacgaacgtcgcctgtgtcaatgtgggtctagactatgcaaggaaaaataag  
caataaacatcgaatcttctcggggaacctatagacgttccgcaggaatactggaaaaatagaaccattaagagatttttagagaaaag  
aaaaacaaagacttttgatggattacttttcttaatgatctctttactgggatgggatcaccagatagttgttactaaataaata  
aggttactctccttttcccaacttatgggatgatacgacccacatgcaacggtaaggggtgggattaggtgacgaacttaagcttacc  
caatcacagtttaagcggctgggtctccgcagctgggagaaattaaagcgtaaagtgatttaataatgccttgcaattgggtgggagaaag  
gatcaaaagtagcaagcgaattcgttctttgtacattaaggtttctataacttgtaattgatgtctacgatagctaatcttatgtaactggcaa  
ataaattatattctttatgataacgcggaagctgattatcatacgaagaaaatgagggttagcaatgcataaacagacaggggctccttac  
atcctaattctataaagtggatctgttcacgattatagaatataattgtgtatccctgtacgatgtaataaacaaccaggtcatgataat  
gaaagcagctttttgttagggaaatgaaatttgaaaacatacaggtttttctgtgttacattcgcacctcttctattgaattcgtgtcg  
gctattcatcatgtcctataaccgttaaaaagattgattggtttaaatgagaaccactggattctccagttgataaaaaaaaaaaaaaaaaaga  
tgaatgaaaagaaagatacttataccagaacaagtaagaacatacattttatgttgcataaattattcgttttagagataaatcccattaggtg  
tttcaatctttattgagctcactaaaatcatgtcgaattcgcgcttatacttaaaaatctctacaaaatacatttagattagctctcattattg  
gtatgtctctacggcctacctaggcaaaaacccagttcccgtccgatcactgcccgttaagtgaatgtctgaggtctcgttagtactatggt  
tggagacaacatgggaatccggggtgctgtaggttaattgctacttaattttgagacaatcttccaaaggtataagtttctactacgttttc  
tttcaactgtctttctgatatataaagtataacttaaaactgttttccagcgaacttttctatactgctgtcagctcttagctcttgacaa  
ccttgaagatcctgttatgaagattttctaccctacggttctcctaatcattgtatctcgggttaaaaataaaacatcaaaaactaaactataa  
gaagagaaaagaattattggactcttttaggggactatcatttttgccttacattaccggttttagtatcacgcatacatatattttttcttt  
tttttataaaaaaaaaaaaaattatcatacgttcaagcatggatttcaagaagtcctgtccaagcaagaagaactgaagaataaaccca  
tcgatgatcccttctaatcacatgggattcccaactgatcccaaaaacccaaaaactggcctactctagaagatggattcagctagtcacg  
ttcgggtgttgcactgtaggcccattggcatcttccatggtagctccctgtcttgaccaaattgcagaacggtttcatattgaaaactctactgag  
aaagcccttatcctcagatataattgctggttttgcatttcccatgatcagtgcccactgtcggaatattcggctcgcgaatcctgctaca  
acaggaatgtcattttcattggaagtcttataatcttccatcttttctaactattagttttaacatggctgtggcctcgcaaaaaccaaagc  
tcaaatgtacattttcggttttggccggttggagtgcaacaccaatgggtctcgggagcggaacgtatgtcagttttactcgatctccggtt  
ctaacactttgtaggattagcatttactccagaagaagaggaagagctgtcgagtcagtcctggctcctttgttgggtcccactatag  
gaccagtaattagtggtttattgctgactatacaactacaagtggtatctttgggtactactaccatttttagcggttttgattgtctttcgatacc  
cttcttgcggaacgtatccaagacctcctgggcccgaagcaagaagcttaataaaaaggaaaatactttaaatttcatacggaaatggc  
gtttagaacacattctcaacataagctgtcacccctgcttgatgacacctgaaaatgttgacaactcaaccctggtaattttgtgcgagg  
ttacatggctattcagatggttaagttagttatttagtgaactgtcgggatgttttctaaccgttaggtattcttatctgtattaacaactaccct  
gtttgtggacacatgagtatcatcaactccttccatcgtggtttacattacattgctcctggactgggttgatctcgggtagccaggtcagg  
cgttttatcgacaagaccttctgttctaaagaatagaatgacggaaagatggcaccagagttcgtgtccgtaattttattaggtacaata  
tttttccagcgggctattcgtgtatgggtggaccgaaagtaccatactcattggattggcctgatcgggtccgcaatgtttaatgtcggcct  
catgttgggttggcgtggtattcaaaactatttaagatacctcataatatactgctcatcatcaactcagttgctgttgcgtccgttccctgca  
gcatttggtttccattgtttggacaaactcttacgatcatttaggtatggatggggaaattccctctgggtttatgtacgttctcatttttt  
tttaaattgataactatcgatttagcgttctgggtcttctattattaccctgtccgtcctttgggttggaggaaagaagttcgcgagctatgtcaata  
tgggtgttcaaggatgaataattgcaacctatattcgaagttttttgttgtttatatactcgtctggaatctcagtggtacttttaacgct  
ggtatacagttagaatattccaggtagattttggattataatatttttgaactatttagaggtgacttacttcttaattaattgtcataatgca  
gtgacttaacgggaataacatgtgactaatactttacgaagaattgagaagcaagttatatacttaaaaaactcatagacacctaagaat  
ttatacaactactgacaagatgataccatgattcatcaaggacaatgatctttggggattgggaattgctttagaacgtgagttacaa  
atgaatcataattattgggacaaaaataaagaagaaggtctacgtcgtctcacttttactctaaatgagcttctctgaatacatattaacga

ggtcgattttataaaatccatattaaagctatatgaagggggttttacttgaaaaagcaatagcagaaggttgcaatcagtttcatatcattaag  
acaattagactggctccgatatttcccatgggatcaatatttccgatgaggggcccgaagaacatgatatacatagaagaatcggaagtga  
aacattcgttgaacgcggtatacggtttgcattcataattatgagtgaaaatacggagaaaagagcaatggcttgacagaatagctta  
caatttagagaaagacagcgtagttcgagtgctaaatgccgacggccaaggcttagatgaagatgagaaattgctcaaaacattgggctacca  
caaagctacatcgtagctacgagttttgaaaacttgcagctcctttcatgctgcgactttatggcaaatactcggggctcattttatgtagga  
ttgtaacgggtggccttctgcatactggattacttattgcattgcgattcccctgagctagatctgcgcatccattgccgaagttgttctgcat  
tgctactgctggatcagtgacttttgggcttctgctgctgggtcgaaagatggcggcttattggcttcttggctgcatgggtggcggtcgtag  
catggacctccttctgctgcttagttgtcattctacatcaaaatttttggtagctccctgtgtttaaaccagtttccagtcagctaccgat  
gttaaatttgcagctgcaatgggctgtggcgagggctgcttcttatttccgtgctcaacagtgtagccacaaaatggtttgcgtatgtatt  
cgtgcatctgtattgtcatctgttggactttctgctcaatthaattggcttccatcgctacttcaaagaagtagcggatttcgagaccaagaattc  
atgatgtagcaatcgggattgggaaggaatcatggatggcttgggtgctgactttcttctgacagctcgtattctgtcggttacgacgc  
tgctggacatgtagccgaagaacaagaatgtagccaaactgcagctcagggatgttttactcggcttcaaatagatcttaagttgctg  
tataatgatcgttttctatattgcctcccgaagccaaacttctgtatccactaatgaaaacaaacgagcagcaaccattcgaagctttatgcct  
tagtattaggaagagacatgttttgaatgttgggaataattggaacttttggatacaaccttaccattgtagcttcgagtagactg  
gtatttgcgtgctgtaggtgtcttccattttcaatggcttagcaaaagtgagcggatagcggcagcaaaaaatgctatctatttcatata  
ttttgtagctgctccttctgtcctcaaaactacagttctgttgccttccagcttcttaatgtagcggctgagcagcattctatcatatgcta  
ctatagcttccgggagattgttcttccaagataaatttccacatccaaatggctccttggatttctatccaaccttctcgtaatcaccttct  
gtggaatttaccgcagtcacctgttttccccaaggcctatccggtaactgcaaaaacttcaattatgaccagttatcttgggtgcaatta  
caatattggcttgattagctggatgttaataccagcggtagaataacttctcatgaaacaaagatgatgacgatgttcatccctcaaaa  
caaaattaaaaatgcatataaaacaaactaaagatgaaggaaaaatthaatttattcagtggtgagtttattctcgtcgcctaacctaaac  
ctttaccaatgcttttcttccagtagcggcattctgtacaataaaatcttcttttgcagccaaagaacatagaatcgctttagggagaa  
aaggatagttgtagccttcttttactgcttgaacctgccttgggttctaccaaccaagtgattcactctcaaaatcagatcacttgcttatacc  
atcaacagctaacagtaattaaatgaaaacccctcctcctgcatagcccattcattcaactgtctgtttacattctgttacttgggttaggtag  
gttgcactcgtgcatattacgaattatagtaattagctgcctcaacgtatagacgttgaactacaaattcaaggatcagagaaccttacgtttc  
tttaaattatgaaaaagcaactgatgttctcctccggcctattctgctactgaaaagccttcaagccctacagagacaaatcagaggatgac  
gaaaatgactatacacttatgagcccatctcctccttattttaggcaaacatactacagaggttgcgagatttcaactcatgaaatgata  
aacttcgattacgaatttccgtcctcgttttggatggagctgtgattcaattcaacaatattggccccggggagttcggagccagcggagat  
ggcccttcacatgaaatcagaatgtctggcgtccttggcttgaacggatttggtaacattatgtccaacgtatagtgaaagaactcattgctt  
acatgatgagtcactggaacattacatattatgtaatttctgagaaaatgggctccttggacagttggttcttctacacatccctggttta  
gctgctgctacgataactcctcaaaaggagtggtcggtcattacattcgaacattccgatcgcattcgtatcattgatggttccaacgcttaattc  
cattgttccagctgcttgcctgcaacattggtatcgtggttgcacaacattccgcttattcgaggtagcagtgctgaatgaaactcgtggatc  
catgggctgcaaatgggcccagaccatgtacgttctccttcatagcagcgttattgaactttagaactcgggttactctattgtcggcac  
gctcaatatttgcagagaagattacttttctgattcttgggtcctttacatccttagtatgttcatgacatttcttcaaaatccattcaattc  
gtaactggatcccttttctccatgtccttaatagggtatgcaactatttcttcttgaatagtagccacctaataagaccccttttcaata  
tcaaagatttattatctatcaatcctctgaattttgatttagaatccgctgtgaaatattctcgaactgttctgttttcttctgcttataca  
aactatgtatatatttacttttgggttcttctgatcacaataatcagtaagtatacatttactgtcttattttggaggccatataata  
tgtatcttatgtttgattgtttaaagactaattacttttgcgattcattcgtccttctgctgtttaaactacttactacttaattga  
atctcaagcaatctaaaaactaataaaaacttcaacaagctagaataaaatgttttacttcagacattacaagaaaatattttatttt  
tataaattcatgttttagcttttgcatttctgtagagccaacatgcttattcttttttggtaactatatacaacttgcagggtcataaacatcgt  
tcaactttaaagacagtagaatcattaatcgtagtcgaagcaaatgtgatgagaggaccacctaacatacggacctccgttatatacctt  
tcaaagatataaaaagagattataaaacaataggatgatgacccgtctcatcctcaatttataaacacacagcccaattttatgggtataaaac  
tcaatttgttctgagaaactcaacaatgatactcgaccttcaaacagctcgaaaactccgaagaccttgcacttttgacagagaaaac  
ataaaaaaacctttacatggaatgcaggaactataacacttagaacaccagtggttcttttagtttaaccaccttgaagcatgagcactt  
ctttgacgaattctttaccaagaaatagaagggaagggaatgggaataagaccacaacaaataaatgctagaagtgatgtagccagtgat  
agtttaaattgtgtacataggacgagcaacaacagtcataccaccaccagcagcgttaacgctagtggtaccaactgcaatgactagccgcc  
agctcatggaataacgacaagataagaataacaagcttgaagacatacaaaaatccccaccccaaaaagacaccacttactaagggggct  
gccaatgaaccgatgggtaacaagtcacgctaaccaaaacaagcaattggaatgaagaaagaaccgaaaatagaggccatagacggct  
ttcaggacgaacattaccgttgcattatgaaagcgtttttgtaatgcaatgaattaaggagtaaagcaaaaagcccaaaaaacccaacat

cagcaccaagcagggcaagaccctctcaccggaattgaaattgtattgtgcaaatatcataggataaccgacattgacatataagtagtaggac  
gtaataaacaagatacaaacagatggcttgaacaattggttcagtacttaaaagcttcacaccacgctcaaaagaagtagcgatggcattgg  
taactactgtgacgttcatgttctgtataaccacaaactacagcttgttctgcaaggtacctaagccttaaagtcgagaatttagcaccatg  
actttcgggcatcacaagataacgataacccaagtaagggcagccaaatcatattgatccaaaagtcacatctccagcctaacttgctacctg  
tgataaaaccaccaagggtaggtccagtaagaggaccaacgaaggcacaagcacaagaagagcaacgctgaagtagcgtcaacaggggcga  
aaagagatcgtaacggtaccaccatgagacataggcgtacaagcaaaagccatggataaagcggaaaatgaccaaactccaaatat  
tttggaaaggccacctccaatctgaaagagggtaaatgatgagcgtacaagaataaataggaagtcgtccataaacctcagaaaggag  
caaaaatgacagaaccacaagcgaacccaataaaaatacagctgaacacaaatcaccgactgcagcactgtgtgaaactgtttgcgccga  
caccaccagcagagaaaatactcgaattagcagtaatacaatggcaatgaaggagcgtactattgtaagaatttttccacatgggc  
caatttttgggttcaacggatcgtctacggcccaagcaacttgatactctgtagaatctgattcctcttgtaagatttactgtgagaggaggt  
aaaacatcatcttcatcactggagtgggcctgaggctcaacttttcatgctgctgatgagtaggttcttggtcttgggagaagatgcttctg  
attgaacttgcttatgtctgattaatgtcaaggtgacggaacttctgcccgtccaaaggaaaatgtagtccattgttttttataactcaagaa  
aacagtgttaatgtaacaagaatataagcaaaacaatcttcaatataaacaggcggttaggctgaatatataaaggaataaaatagagtag  
aaaataatgacagagaaaaaaaccaaactgtaaacgaaagaatggactgaacacaagacgatatggtaaaaccaagcaactctgctac  
tggaaaagaatgcaagaatagaagaaacagatagaaaagagtgaaaacaaacgtaaatgaaaaacgaatgtcgggtgaaatta  
acaagactgaaaggataaactaacttttgataagcgtttcagtagcggctttttataaattgtctcaaatgaactgagataaacctagataa  
aagtattttaaacaagaggtgatcaaaatcaagattcgtcgttccgtcgcacttccgaaagaatgtagatcagttatagagaaacaaggtgca  
gggacaaaaatactattacaaagaagctgagtagcaattcaaaaagaactatcgacatatattccaaatgtagcgtttaaataaggggaa  
tcacgtaaaataaagggaacaacgcttcaaaaaggaagtaaggggaaaacggaagaaaaatagcgcgaatgacagattaaatctacaag  
ctcgaataacctaagtagtcaatgatacagtcggtcagacgagatagaggtcaatgcagaaccaactaaggaagaagtagcgaaggaaac  
tattgtccaaacaagcaaaaaaaacaaacaaatcaagaataaaaaacgaaatcgatgtaagtcaccgactatagggaaagaaaa  
aagaaaaatctcgaggaaagcgaactcagtaaaacaacaccgaaggaggatacgggtgacgtgggggaaacgaggcctttataaatgca  
agaaattacatgcccgaatgtaaaagtcttctgactcaataacatatacaaaaaatgacgcaaaaggatggagtgagagcagagatagta  
agaagaagaataagttcggctacgtatcaatgaggagaaagtaacatcaatgaacattataagactcagaggcattgtaattggcaaaataa  
agtgaaccacacagagtcaggttcttctgttattctgattgggttaatgatagggtcataaccgttctagacctttgctacctttgcaatccga  
cgtaaagtgtggagagccgttatagatcacgagatacttttattcgggtatttgacgtaagtctcgaacctgtaggagtgcttctgtagga  
tgatgaaagtgtaaaggagcttgaacgaatgagaaaacagacgaaaaggaggcgcaaaaaagcaacaaggcggccaaaggaaggtta  
caggagctagtgaaaatgataacgggaacatgaagtgcgtaaaacttaatttttaagtgcgcacatgtctgaatggaatagacggggtaa  
tcaaagttataaattaggggaagaaataaaggttaaatgctcggatgcagtaattcccgaacggcattgaggagctccagcaagtcttt  
aaagatgacttggctgaccgacctcggcgagttgaagagggaaaccagagggtattcgtaaaaagataaaaaagggttaagcgacga  
atgattgggactcagatcggcaattgcgacggctggcatcgaagcaaaagacccccagctcaggataatgaaaatttaccatcacagaagt  
tcaacctcttccgtaggagcatgtattatcatcagcatcttctcaggtgaagcctagtcatctcttggaaaagttccctcatgtgttactttcatt  
gttgatgatgtcgtgtatctcccccttagcgtctccgcatcttttctgttttaaatgggttcttttctgttaactgaaacttcttcttctgttta  
taccactctatccgcatacccgagttgccattcaaaactttcatacagctcacttacaataatttagtttcaaaataaaaagcttttctgtatgt  
gatacagacgcgctctccatcccttcttactcagcaaaaaatcccttgggaagttcgtttcactcagtgctccttccctttatataaagagg  
gatttcttcttcttctatgatacatgaaatcttcttccgttccgtcctactccgtaatagatgcatcgcgaccttgcgttctttgaaatag  
ggatcggctccttagcgtcgttaagaatcaaaggttaaggtacatagaaccctcggatattcttcccttaataagcgattggaattgcttctt  
cagagaaattttactacagatagttaaacatctcaaatctttaaattctgatgactggatcctctgcttcttcccttactacgcagaaat  
accggagtaagagtctcattcggtaactattggatgctattgccgggtacacaatattgacattgaaggaggttaacgtgaacaaaactaaa  
agcattttctcgttttaaggaaggcagaataaaaaagcaatacagaattgcataaaagggtcagtagagagcagcctttacataacctta  
gtttgggtttcagaggattttttctgtaaaagtttcaagtcctgttttggttgattgatttttcttttttctttatcgctatttttttctt  
tcaattatttactaattcgttctgcatcttttggttacattagattcattcttcttcaattgttcttgcactatattgaatcatcccgttgttc  
aatccgcttccaagtgtcgtcttcttttatttagttaatgggtccttgaagcaacgttatcatgaaactttggactgcgctacgtggtgaacgc  
cttctattgctaggcgcctcaacactttacgtggcggtggttcttactatgggtactggtggcattggcatgatcacatctttgtattttt  
gtttcatggtctcaatacccttgggaaaattctttgtcttcaactttgcatttttcttttcaagatgacattcttcttcttcttctgctaccg  
gggtacgttcaggaaggcttgaataaccctggcgaatagctttatgctaccttctcctctcattgccactataatagtaactttaccata  
tgctacccttacaccggcgaatggatggttggacgattcgatcactactggattatgtcgttgcgcttgcattttgtgtcagctcctttat  
accctttctgcaatcatcattctgttataaccattattcccgtctcattcttcaattttccctgtatgattgtggtgtgtcgcgagcgcatt

gttgagtctcagcctccagaacaggcaaaaaatgattgtcgtggtatcgcttccaaggctgggttttggatctatcttctgtttatgggaa  
taacatactctgcttttcacagccggcttcaggccccggctgctgctggcatgttcatctttagccctcttcatacacgggtctaactctt  
ttggatcttgccttttggctgtacacaagcatcacctatcttctgacaaaagactcaccgcaatggctactttcatctgcagttcttctgttgtt  
catgatcggtttggcatttttaactttgacttgccttggcttctgcatcgccggctttgctctctggtaaactgaaatttaaggttctgtgctg  
caatgatcttgcgaatgggtgcttgttatggatccaagagcttggcaaagccatcaattctaaagcccttgatgttattggcaagttgctggt  
gtcatcataaccattggttggatttgcctaatcattcttgcgcttctgctgatatgttcaagaactcctctatcctggaaaggatgaagatgctggc  
attcttctctgatgttctgaatactatgaaaaatagaatccttggagaaggacggcacctccaaggatgctcaagtactctgaaagaaatc  
aatcataatgacaaaaattcctaatactggttctgtaagcttttcttggcttaattctgttgaaaaagcatggtaactcttggttttttcttgg  
tattcttgccttcttcttttttttttttttttttttttttttttttttttttttttttttttttttttttttttttttttttttttttttttt  
ggttatctatttttttagacgttctgcttcttattgcatgattctgtgataaaaaatggagattttcaagcctgtgacttaattttatattttct  
tttttaaatgtaacgagcttcaacatgaatactgtacctcttctcacctgttcttattatcattttattatcaattaagttctaaacatacttct  
ttttggtagagttgaatggaaagctaatgctgtgtctaatggaacccttatgtcgtcttttaagttttacattggcaagccgatttgaatatact  
aattataactactgttgaatcgtaaggacttaataatgcatgcttttttaacgatcattctttagtgtttggttcaattgatttaattcat  
attaatctgtagaggtttgggtaaatctgacagatgaactcatcattaagttctataataatacataacgtaaaagttaactaagccttttgaat  
atgtgtacaatatgattgcaggcctattgatgagcagttagaattatacaagaatatcaacctgtaatgataatgtgaactttcttttaaacgca  
gtctttttgtctatttctcatagtttctaccatattgaagtgcacctataataccggagggggacttctcaccttagggaacctcagcttccc  
tctaccaacaccataattctttgagttttggcaacgatcagcgttgggaacggactgaaaatttaattgacatcttgacgatttgctaaatgtt  
gtctggaagcctgcttctgtaatgtgcccattggtattgtgttaacgaaatcgttgcagatctggtgggtaagtataaagaaatccccttctatt  
tctgttctattgattgatagtaatgactaacctattagaacaattacagccaagcgcgcaatctttaccattgattagtagaattggctcggtttt  
atgccacaaaaaagaatatcccctcacacaatttaaatatgccagcctgtctcctacaatgactgctgtaatattggagaattccagaaaa  
gcatggagataaaaatgagcctggatgtttgtgtgaaatgaaactgataaggctcaaatggacttgaacaacaagatgagggttacttg  
gctaagatttaattgagagtggtgctaaggatgttctgtcggtaagcccgttctgtcactgtagagaatgccgaagacgtggaagctttaag  
gattcagattgaagattctgctcctgaaactactgagactcctaaagaacaaccaaggaagcgaaggaagaaaggctgatgtactgctg  
aagctgagactgccaagaccgagactaaggaagccactgcccctgatgatcgtatctttgcatctctatagccaaaaaatggccaaga  
gagaggtgtaacttatcctaaatcgccgatctggtccaatggccgtattatcaaggtgatgtgaaaactcaagcctgaacgtcctgcccct  
ccctcaataaagctgctgctgctgactagctgccccttctgctaaggatgctgctgctgctggcacctatgaagatttaccttgagcaatat  
gcgcaagattattgcttctgcttactgaaagtaagcaaatcaacccactattatgttagcgttgccattgatgtagaaaagattgtctgctcc  
gcacagcccttaacttattgctgatggccgctacaaactttccgttaatgatctgtaataaagctgttactgcccgtttagagaagtagctga  
agcaattctgcttggatgggtgactttatcccaacacaagaatgtgacatttctatggccgttctactccttctggattgattactcccgtcat  
ccgtaatgctcatagcttggccttctgaaattccaatagggcaagattacggccatcgtgcccgtccaacaatgaagcctgaagagta  
ccaaggtggtactttcactattccaatttgggatgtaccccgttatcaattcactgctatcatcaaccctcctcaggctgtatcttggcagtggg  
tactgttagcgaatgttatccctgataagacctctgagaagggttcaaggtcgtcctatcatgaaatgcatttgagcgtgatcaccgtgtt  
gttgatgggtccatggctgcccgttaccaccgctcctaagaagatcatggaaaatccttggagcttttctttaaaggcttcttctgttcaaagt  
tcaagagagtggttagcgtcctcctcgaacgtagctggtgactgtgtaatattgtctgttttaaatcttcatataaaatgttcaagtcga  
ttgtggaacattatctcatgaggtctatgcattatttcttcttcttcttcttcttcttcttcttcttcttcttcttcttcttcttcttcttctt  
ttagtagaatgattgggtgaataagtaagaatagtaaatgtatatatatatatatatacacccttaaaactttaataagtgaataaact  
ggttcgcttagataacttaattacgttttatcacatatttgcctgcttaagagatttagtacaccaccacttacttcatcctttaccaactcgaac  
gccatttcatgactgaccttcaattggcttctatgtggcttttatttgccttaagcacaataatgggttctcaaatgcttcttcaagaaaatta  
ggaggatcagaacctaacggctcaccttagcactatgagctactatgccgatcaaatcagggaaattgaagaaggtcattcggatttaagt  
cgtcttactcaacacatcgtatagggagaaggacaagatgggagcttatttgaacgagctattactaacaggactagtgaacggctcactc  
gctttgaagatttgcgaacttgattcaaaaagtgccggagaatgtcatgataatggcttcagagattgttaaaatattgttggcttctagcaatct  
caaaagttggagctcagaacatgtcgggtgattgcttctgctccttttgcgaacgtagcgtctaaaacaattctacagctttggaaatgaattt  
ataaatcttcatgaattggttcttttttttttttttttttttttttttttttttttttttttttttttttttttttttttttttttttttttt  
ttcacgattgacatcttgaagcttctgatgtgaaggcatttcaagtaaccaacctctttgttattcatgttctcctaagtaacgcttggagc  
aagaatgaaatgactcaacagagttttattgacatggtgctcaacagcgaacattcaggccgttacccttagtactactggtatctttaa  
ccggagcatgatgaagttggcgacactgtagagatcggaataaaaaactctgctgagggtttatataatataatactcagacgaatcctgtt  
ttcatgatgaaagcagagctcctaattcacttttctgtagtaatcctaatactcggattaatcaaaactacatctctgttctgctcaaccaat  
agttgagtgacttcaagttgaattacgccattccatcttttttctgctttacgctgtctcaaaagcagccgatcaattcgaataaccaatgttt

ggttcctatatgattcattctatccttaactcgaaaattccattccaagtctttctgtgattgacgtcctcagagagctagagtttcatctactagtt  
gcaattgagaatacacaagctagtatttgaatggtagacgttatgtgaattccggctgagcgattgcctcaacgtttatattacttctgttatgt  
atcacttccctaatcaaacatcaatattacaacgaagagttgctgagttggagagagatggattcacttttaagcgaaaaagctacaactgca  
actcagctggttgtgcttacggcttgaatacgaatgcaaatggaaacaaatgagaaaggaaagaccatcttcagttggtagacctttcgttattgctg  
acttctgtaccggcttgccagtatctttcagcagatataatttcgattctccatttggccttgaaaacagtgaatgttttttgagttttg  
aatattctactacttccatgtttgacttccattcagttttggaataacgtacagtatcttattttctgctttatggagtttcatctacgaataagtg  
acaagtggagaaatggcttggaaaattctcctccttaggagagttggctgtagcgttaaattatcacgaaaatttatgctctttatggacctatt  
actgtcgtgcttttctcctttactttatcgcgctttaaagtcgacaaaaggaaaatattgggtacccatcaagctttaattaccgattatctctgt  
acgttctgattgctgagcaacgggactttaaaaatgatgagcttgaggtggaagagatcttccctctgattctcttcaattttgaaatcagat  
ggcagcgtgaccagaagttatgggagcactaccctcagctgctactagcagcgtttttcttctgaagcggctgcttccagaattattacaag  
aaaacccctcagctctatcctgaggaataaaaagtttttttggaaaaatcttgcatccgaaatattcagtttttatgaaaaactacagaaac  
tacccaaacagttactttgctcttccacgaaaatcttttctaatggatcgccgatgcagactcaatccgaaccgattatgcatcaaaaa  
accaatcagctgcaaaagtcgacaatcagaatcctagaaaagagaaaatttgacgttaaagcaagcttggaaatgcccaccaagtgcccgaac  
atcatcgggttgctacgctctgaaattacactatcattgcggctgctagccctgcttccgctgtggatatttaataataaaatctctctca  
gctgcgactatccaacatcctccttatgttaacatagactttgtttcatggtttgatgtaaattatcataaaattattgctttcttttgatgt  
cgttcaagtgcgtagagaagttatcagttatccggttaatatgtatgtactataattacactcaatacatttgatcattagaaatattggttt  
cgcttactagagatgaacagaccatctggctgtgcatagatatacaaaagccttctgttaagtgtatgttttagcgggttgaattgc  
ttacaataatgtttgaaattcttctctccataaaagcaccacttttagccttccagaaccttccgacatacaaacagtctttatagattattgggt  
gtccatacacttacatcaactataccataaatgttttttaaaaatcaatctactaaaatcaatcctaaacaaccaactgataggagtgactag  
taaagacctgatgatgtaaatcatcaagtactttacttctaccaccagccttgggcagccttgtaaccttagcttgaccaggggagccttctc  
gacggccttgatgacccgacagcagcgggtttagcgtatgacggacggcgaacggccaagaggagcgttagtcagtgaaagcttcaacgca  
cataggccttagtaggaaccattgagcgtgcaagcatcaccggactgacgaaactgggagattctcaagcttctaccggtagcagcgtcaat  
cttctcaatgagctcattgaagcggcaagcaatgtgagaagtgtggcagcctaaaacaggagagtaaccagcagagatttgaccggggtgtta  
agaatgatgactgagcgggtgaagtttagcacagccataggggggctcattcttagagtcaccagcaacgttaccacgacggatgctctgacgga  
aacgttctgacgttgaacaaacgttgtcaccaggagaccagctcaagagattcgtggtgatttcgacggacttaacctcagtggtgacacc  
agaagagcgaaggtgacaatcataccggcctgatagtagcgggttcgacacgaccgacggggactgtgcaataaccaccgatctgtagaca  
tcttgaagaggaagcgggagggtctcnnnnnnnnnnnnnnnnnnnnnnnnnnnnnnnnnnnnnnnnnnnnnnnnnnnnnnnnnnnnnnnnnn  
nnnnnnnnnnnnnnnnnnnnnnnnnnnnnnnnnnnnnnnnnnnnnnnnnnnnnnnnnnnnnnnnnnnnnnnnnnnnnnnnnnnnnnnnnn  
nattgaccggggtgttaagaatgatgacttgagcgggtg  
aagttgacacagccataggggggtcattcttagagtcaccagcaacgttaccacgacggatgctccttgacggaacgttctttagcgttgaacc  
aacgttgcaccagggagaccagctcaagagattcgtggtgatttcgacggacttaacctcagtggtgacaccagaaggagcgaaggtgaca  
atcataccgggttagatgtagcgggttcgacacgaccgacggggactgtgcaataaccaccgatctgtagacatctgaaaggaagacgga  
ggggcttctgacgggacgtgacgggggctcaatggcgtcaatggcttcaaaaagagtcttaccttgacaacaccagccttggtctcctttgccc  
atccttggtaccaggtcattgtgtggttaggtcaatcatgtttcaccttggaacagagagcggggacgaaaggaaacgggtctgggggttgaaa  
ccgaccttctgacgaagttggaagtctccttgataatctcctcaaacgagccttgagagtagttaacggagctcatctgttaacggcaacaatga  
gttcttgacacccaaagtgtaggcaagcaaacgctgctcacgagtttgaccgcttggagataccagcttcaattcaccagtagcaccacca  
ataataagaatggcagcagcgttgagaagtaccagtaatcattgctttagaagtacaggtgaccgggagcatcaataacagtaacgtagt  
acttgggagttcgaactccagagggaatgctgaggtgataccacgctcacgttcagccttagccttgagcttgcctcaaacccagggcgtacttgaag  
aaccttaccacattcgggtggcttctctgaaatcattcattggtacgttgcataaccaccacacttgaatacaagtgaccggtagtggtgac  
ttaccagaatgcagcgtgaccgataacgacaatgttaagtgtccttttctgcccatttcttataataaaagtgggttggtggaagcctt  
tatgtcccctgcttacttagtaggtcggtgtgactgttttctgagaaatgtttgtactggtttgttacattcgtaatgttaactt  
tccgcaatgtttgaaaattgctaaataaatttggccagataaataatctagagtaaacagatgcatgaataaaccaaaatgaacctgt  
ttatgactgtgaaagtattgaattatgaaataaatgttaagagggtaaaccacgtttatggaagagcaatgttgagggtgctgtacaagatgt  
ttttgcaagcttttctcatagaatgatacaaatcaaaaaaaagggtaatatgattgaaatcaaga  
ctaaacttctcagaaataagaagaagaagttttgggcaaaaagtcgttactaaaagattgccattaaaaaaataaaagtaagaataa  
aagaaatcagcaccataaaattcaataaataaccatacaataaaacaactacttagcttagctgtatataaaataggagctcttctgttttgaga  
ataggtttttatcaaaatcctatacaaaaagtcctatgttccatattctagctaaacaatgataaaaaaggggtttctattatgcagttcc  
ttttattaaatccaattccttaagtattagctacgttagtgtttttaggtagaaggagctcaattcagcaggttgaatcgctaccttttt  
cgtatacgaacaaatccttatttgaaatcattgtcgttgatgattattgaagacgatttccatagttatactcagccttaattttgtgttac



cactggcatcagcatatcttcaagtataacactattacttcataaggaaccctttattctgttatttctataagaaaattgtaacaaa  
tctagtcttcagccttcacaacgaggatctgtctgtactttctaatactacaagtttttctgttcttgacaggttcaaggatgtcaagtaatact  
agacgaaataaaagcaagcacaaggagctagtagataagtgcgattggatatccatctcacaatcatcttgcctccttgattgatgcactac  
agaataccttacaggatccccgtccatcaaagtttcccttaaatttcaaaagtagaggatgagggttaactttgtgtctctatggctcgtaa  
tttggatctggcttgcgaaccagcttcacgaagcgtaagtctattccttaggtcaatccacaaaaactattatctctaaagttcatgtctatt  
ctaacttttaattttacagaattggagctgggcccaggaactctgctgttttaagctttccatataatctctaacgaaaccggaataccaga  
tgccaattacttaaccaatataaaagagcacgatgttcagcttggatgaatgttctgctattgaagaaaaaccagtaaatcactccaggtgt  
ctttgagtgcttctagccacttgatggaattagtgaaaaaatgacattcgtcttaactctaccgggtaaaactgaaaaaggagaatttctct  
ctatgggagaatttgccttcgatatggcaatacaaggatccctctatactgtcaatgctctggttagcacatttccagcatttcatgatgtcga  
caagttttggcgtagaagtataattactaaagaaggctcaattaaccgctaccagcttctctttgtttccagataggttggctcggagggt  
gtgcatcttctgacaaatgttataaccgaccattttatgtctctatggggtcatagaaatctcaagaattaagaaaaaattagagaataaagt  
cttctagaaaaggaagaatcacggcttctcgagcgtcttctgctgtctgaggttaattccgaagcaacaaaaatccatcacctcaggttag  
accaagctctcggagctaggcaaatccactccagagctacgaaattctccagcttctgtaccaagacactgttatgtttaaaagtgaatgt  
tcttctcattacgatacattagatcaaacctccaagttttaaagcttgtataaataaggaattcatttctatagccttggtttctaacagctt  
ttgttgattttgtattttcttaagatcagataaaaaatcattcaagtggttattgcaatacgtagttctgcaataagcttcggttaagcaacat  
tatacgtataaataaattcaagccaccggaactcgttgtttataaccgaatatactgttgttttctctgcccttaaccagcatcattaaaag  
agaataatgctacatcggcgagttcatttaagtctcagctccacttggacttggatagtagtattgctgttagtattttagctagcacaatgaaaaatga  
gctcgataagctgctacagaactcaaaggttactgatcgacgaatttttaaccttcagatggaaaaacttttctgctgtatcgcagatatttattac  
acacagtaaaaggatagtagtgattgggattcagctcggcctttaggccgaaggatgtcacggattacatggatttacctcctgtgagcaag  
gatcacagctcttgatcggatagcagttctaaaattgaatggtggaatggggaataatgggtatcaataagccgaaagctttaatcgagctt  
catgacaatacaacgttcttgacttaagatccagcagattgagcttaataaacgatagtagtagcggctctttttgttaatgaactctgt  
gttacgaatgacgaaacatgtaaagttctcgaaaataactggctacaatcttgatatactactctcagcaatctcgtttccctcgtctcctcgt  
agactctcagcttctattcccaaaactgctcttctccattgaggaatggatccaccggggcatggggatattttgaagcactcgttcaactccg  
gaatcatagaccgttacttgcccaaggaaaagactacttattcgtgagcaacattgacaattaggtcctccgttgatcccaaaattcttgtca  
tgttatagaaaacaaatagagtatacagtaggaggtcactgataaaacgaaagctgatgaaaggttggtatcctcgttaatcaggatggcattt  
acgattattagaacggaatcaggttccagaaaaacaccaggaagaatttacctcagatcgaattttaaaaatatacaacgaataatgtctggc  
tttatctgcagctgtcaaacgagtagtcgaaaatcgggaactgaacttggatgttatgcccaacattgaaactatcaaccacaacgatgagaca  
gtaggggttattgagttcacaacttctattggtctgcatcagcaattcaaaaaaccgaaggaattaaagtgccacgtcaaagatttattctg  
taaaaactctgcagatctcctcgtacgtggtgatttatattccatagaccatggatctttattagttgaggattcaaaggttggatttctcctc  
ctgttgcacttaaccaatgaatttgtgacgtagcacaattattctgctggataaccgacatgccgagcattaaagacttaactcattatcgata  
tctggtaatgtttatttgggaaaaatgtagtttgaaggaatgttatttagcatcaccaaatgagcagctgaaatccacctaacgctgt  
tttagaaaattgtgtagtatctgggaactgtaaataatggaccactaatgttctttgctaattgcaaaaactttgatgtatggattttatgattag  
atatggaatactttaaagcttattaatacaatttcatatttactataaccgttcagtaagcattatttataaattataggatttaataatctaga  
tatccaggtagatcctgcaaaatataataagttgctttacgtacaacgcttcttacgattggcgctttccaccaacaaacgaaagcttctttt  
tatgagtggaagactaaaatacatagttccagcataaaggactgactatccacgtcttctcaatattgtgcataaataaggatacaaggcagcttg  
tagcaatcataaacaggaatgtgaacaggttagtttagatcaaaataaaaaaacaacgacttgataaaggaggagagaaaaagtagca  
agcttcgcaatattatcaagaaagaaatgaaataattgacataagcaaaagcaaaagtaaaatcagcgggttagtttcatgagcttttagtga  
cgcggaagctattttactcaatcatgaagcccaattcagaatgaacagaagaaacaaattcaagctaattgtgcaaaactcataattatcaat  
aattagttggggactcacagaagaaggttattgtctcactggagagaagattggaagtagccggaatagacgatgtagagacggcaggagcc  
attgaggattgtggtgattagtagcaccagtttggatggtcatcatgcttactttggttacggcagaactccaaaggctcccaaaagcatctccac  
cagagctgccagctttagtaaccttagctgtttgggtaacttgattggaggaggaaggttttgggaggagagaccgacgaaagtgggagtagc  
aacgttcgaagaagcaccgttccaaacgagggaccagcaacagaagaagaagagaaggaagggaaattgaacgaagccatatttccattc  
ctacagatgcagaaggaactgaggggtcactctgaaaatcgtcaaaagcatcatcgtcatcgtttccaggaactgtagcggcagttggaagagc  
ggaagacgttgaactcacaatccatcatcatctcaacagcagcagtagtagaagaagtaggcatggttagacgaagggggcagcagc  
agcggcgggctcatcgagccaagaagatcagctacggcagactgttctctgcttaggtggggaagagactgaagtagcattcagctcagcat  
tctctgtagcagctggagttgccctaggtgagtgatgagggccggcactatcgtgatttctataactcgtctgattcggaatgatcatgtgta  
tcgctatacgaagacgagtcacggaaaccgccactactaaagtctgtgaagccaccgccatccccatagacggtttctataacttgcggt  
acgaggagagcctcaaagcctgagaatctcgggaggatccagaagacactctgcatcacctcgtactacaccgaaatatttaccgagc

gtctgtcgagcctttctttcttgacgaatcgatcattgtcgttgagtaattctaccaactcttcgctctcgttctcacgtttaatccttggtctctt  
tgataacggcctaataatgaaagttgcgcaacatctttattgttgctgatgtccttagcatcatcaatgactctctcggagccattctttactaa  
aaattccagcagttgaagcgctttgtatattgtcgccattctcagctgtttttcagtgaaatctcggttaaacatcggcataatctcatttaactg  
agaatagttatcgcttctgtgcaatttccatcatcagagacgtacttgaccccagggttcgttgggtggcttcacgcactttggcttccgctcga  
agtataattcatcaccacatttgcgcttgcgaaccgctgcttaacgcatacagattaatgtttttatacttgattgaagtcgcatctgaat  
gctcgtttctcctcaatgaattcacaattgcccagtgaaagcctcgtccaaatctcacaactctctatttctttctttcaatttctagaagcttc  
ttttgtcgttttggctgcaacgactaaatcttcttttgaatctttcttgtaattgtactctgcaagtgcgttcgaggtcaattcaatgaaaccgt  
agtgggtcctgctgtaagtgaattacgtcgtgtagtgatgctcgttatataattagtaagcctttctctacgttaataaacaatactctagaga  
tctagcgatattatgaataatcgagtaaaagaaaagaattccagtgaaatcttgtaagtttaacactttttatgaagaaaacgaattgtacttctt  
tcaatttaggttccaatgactctgtgtgacaactgtgactgtcatcctggatcgtttctggtaaatcttttggactaatctacattcaaatttg  
cttaggtgtagacttttgggtgaatttctttggttctttcgtgaataatcaatacataaaaaataatctcacaagtaaacatgttccgat  
gctgtaccgacaagtatacaatatacagacgtatttggtagtcatgtagaagaacatgaagaccagtttaataaaaaaagcaaaattgct  
ttacaaaaaattgatataatgaaatccaaaaagtgagctttaaaccatgaatgatgatgattacatttcttttccaaactgttcgtagcaa  
gagtggggaatcgatgtaaaatgtcatagtagctttgggctcctgaaaataaacaaacttttgaacaaggatccattcttggttcgtat  
ccattcgtcaatgccttctcgttgggaactcagtggtatctggtttctttctggcttctcatgacagctagagtaatgtgacgggaaatt  
tcacgagcattctcagatcaggcaaaagaccttccgacttgaataaagccttgggaacagtggttaaggcgcagaagctgttctcaca  
ccattggtcaaaaacttcagccggagagcacacagcccacgccaatgctggataaagaagagcattattacattgagaaataatgtaatcctt  
accatcacgcttgataggaggcataggtgatcctgtagcaagaagggcctttccatttgcattcattgattgatccggtcttgcctcatcaact  
cgtgggattggagatggggaataatgggctgtcaacatgtttgccaattcgcgcatagcgtttcgggtaacttaccatttgaccagaacag  
ccaataagacggtaggttgacacgagagatagcagttccaatcaacagaatcttctccttaatgtcccgaatcattgctttcttaaga  
aaggttttggccttctgtagcaacagtggtgctttccagtaacaagccatagcgaacccaagtagataggtcaatagcttctgttggta  
agaccatcccaaccaaggcactaacgatttgattggcaataccataaccagcgtaccggcgcaaaaatcattatcggttgcgtttaaagg  
tgatttgaacatgaagacagccacgatggcagctaaagcgacggcaccagttccctggatgtcatcgttaaagcaagcaaatctttgctgta  
tttgcaaaaattcgttggcgttttcaagccaaaatctcaaaatgaataaaggcatggggaacacctctttatgcaggtaagacagtatcc  
aaatattggtcatattctcaccacgacacggtttcttttaagaccatgtattgaggattggaacgatttttgattgctggtaccgacgtcaa  
cacaatgggcaaaaagcatttgggtcaagtcagcacacaaagtcatataatggccttggcaacagaaatcaaaaaccaccgacaccttg  
atcggcgaacccaaaatccttcagagtcagtcagaatgatataattgacggaatctttgtccaatgcgcaagctgattttgatatactgtg  
aatccttatgatcgtatgcaaaaagcatcctccgggtaacgatatacgtctgagaattgcataatagcatcccctcgggttggtatagatgat  
ggggatcatttctacaaatgctggctaatacaagcataaaacaaagtctgatttcgggatacttaattgggacaataaaagtttttccaaaac  
tctgtcgaatgacttgtattgctcgtacgtctgttaacctgttctgcaaggtttccacaaccggaggcaagcgagatgtaagctcatacttg  
atacgtcttctcggtaaaagcagtatcctgttcaaacgaggattcgtcaacatgcttcacccttcaaagggcacttgatttctcctcgcct  
agagttcatagctgtttgcttattcgtttgttttatttcttaaaaaaaaaaacagtaataaagaaagtaaacaaaaacgtcattgtttggtgg  
ttgtttgtttgttttgggaacaagactttttactgttttccaatcaaaatatagatattgctatcttcaacctatacttattatcttatac  
agtattataggtataaccagaaatagaatcgaagtcacttgtgtgtatgtatatacgtgtacgtgtatgcttgaaggtacgtttgtgtaggt  
tgtgtatcggcgtgtttgtgtaaccgttaggtgtagctgtgtatcagtagcctagtacaagggcctatgactgtttatataacacgcgtatgta  
tggtttcttctatgtagataagaatcgatgtttctatagaccagccagaccttgttgaatgatttgataacgtagttcaatataatcgtcg  
ttgaaaccatcaaagcttatcgataatgatgactcaattaacaagctgaaacgtatcaaaactacagaaactgtagcgttcaaccctcac  
ccacttctagtaccgtccgcatactcttctcccttgttcttcttctcgttggattgactactggatcagatcggatcatccaaccaaga  
gaaaaatcttctgtcgtgttttcaaaactgagggtaaaatcgtccaaggtcagccaaccaatcatgaatcgtttctgtatatttctaatca  
actaggttgggtggttcaacggttatcatgaaatctttgttttatcaacacataaacaataaacaacataatattggaatgctaaaat  
aatggctaaataataatgaaatgaaacattccttttcttttaaccttgatttactattgttgattcactcgtcatccttttcccttta  
tcaaacactttacattcgttaacaagaattatagctactctataaaactttatattaagctaccaactgtggacttttctgtaaagtacttttg  
aaccacaacagggccccttatagaggctgtgaaaaagggccaccaccacccagggaagttagacaggcacaataacatgtaac  
acatccttctcctactaaagaacaaccaacaacaacaacacatcctcaactcaaccggtcaacttgtaagaatgtagtaaaaaaggat  
gttcccttgtttaaattttttggcttcttttttttttatacacaacagtttaggttcaaaactcagttcaaatccattggcaaacaccac  
agcaaaacattgctggtcaatcttttgaacatcgccaacacggacgattgcatctctttgaggattcttgttcagttacccaaaaaaaa  
ccttcttgcaaaatccaaatggcgaatggaatcttgacttctcgttgatcgccttttttctgcttggctgtctgttcttctcctcatcaagga  
aagggcagtttgggttctttagaataaaaaccaatgttaattccattgatttcaattcaatggtcataacctaataatcaatttattc

atthttatcttcgttttgattccttacttcttttctctttttattatcctcttctccttgcttctttttttttggacttctgatctacttttagatacatt  
ctatgtcaacatcaaaaatgtccgacaacttgaagcttcatccacttgtttgctcgcttctccgtaatgatacttctcgcaattgtctcgtttgga  
agaggtagagcttcttgagggtgccccttattctccttatagagaagagtttctaaacgaggaggcattgtatttgcctcaaagcctcagtatggc  
aatacctatttggctgctggcccttattacgccaaacaaaatgacccctggatggcctctcaattttcattgggggtgaaagatctcggttcgaaa  
aaagacttccaacttttggtccgaaatttctgctgcagggttctgctcctgtatgtctcattttgggtgcaatacctatgccattgtaccagga  
taatcaaggcattgttcgtataaaaatttggtttttcttttttttattacggtatctataatgccctcggtttatttggattacaaaacttttcatatt  
atctgtcaattgggttcaagtaaacctgggtggcacgatgagctatatttattggttgggttttagtatcctcatcggcagccttgccgcttttattac  
tgattggccagattacattcacttggatcaccttaattgtcatttccatgatcatcccatcgagctctttttcaaagtttgggaaaagcattc  
acggcgaactactcaattttgtcccagttgttcttgctgaaccagcgttcgaagcaacgctgcttggaaccatcggttggagagatgcctac  
gctcattattcttggttatcattgtcctttgttacctcatcgtttatcttgccggtgaatatcttacaatattatcattgctacacttcccacagc  
tccagtgctgctattgcatatgtgatttctggatgtgtacggttagtttggcaatctgatttcatcttggatattaacactaagaccctcttag  
cgttagtatctgttttaactttattttagcttactcttcaggttacctgctaatctgtatgccagactcgaatcgcctcaacagtttcttctgta  
caaattgccttctctaccatgatgacctcttcccttaattttgatgtcgcgtacagcatatcatttaataagtctctcaaaaaagccttagat  
ccctacgcagtgtatcgaaaaaatgggcagaaatttctatgtgaagtcggttgcttccaaccttagtattcatttcttaggctggtctcttat  
cctacatttggactaacgaggcgttatccatattttacgctcactaaggaaagtcacagattcaagcttacattctatgcttcttctgcctg  
gtgggcaacgagcttatcgccgcctattttactcggcgtgattatgagtaaatattatgatttgaagctcttttgaagctatccgtgattttgtga  
atacctgacatgataaccagcttctcatcgcagtcggcattcatgttttgaaaacgttttttagcattattcagttacgatttaagacctttta  
ctctgctctcttcttgctattttctgttttagattgattgtcgaacataggatgtatagtagcatatgggtcgtatatcttatttctttaaagat  
tttcatctttattccttctcttcttctctgctgatgatcgtatctgcaatatctgtgttgggttacggttccttaatttttctttgtatcaaaat  
gacttcaaatgcaagcatgcacttaccatcgtaaagtcataatagactcttaccagtttcatatgtatatttccaatgaacaagaaaacgga  
atctttaataataattatattgattttccattcgcctctaatagctataaaaacataattggtgaagtcacaaacttatataccttctctaaacgctat  
gagtgttattacggaatatacaataattacattatctcaaaaagttagtgtatgaagaagctctttatcaaatgacaagagtggcgaatc  
attgctaacacactacatgaatataaagttatcagttaattgtttttgttttccaaagctcctgttttgggttttgaggtttgttataatcgttact  
tattgagtagcaaaagtaaaagacgggtaatttatgaccaaattgtttgagcaatttcaaaaggattatcaagctatatttcaattaaataat  
gagcaaaataaataaggctccaccagctcctcaaatgctgttcttcaaatgcattaattgttacttgccttactatgcattttcagccattacttctc  
aaacaaaatgtaataatattgaccttgttaaaagacttcttgaacaatatacaaaaagatgtgaaaataacttactaaaagcatgtaaaacc  
taaactcaagcggtaattaaatagtggtttgctggactggcgactgttaacgaataactgagattgggttattgaaacacaagaaaagtgaa  
acaaaattgtgtttgttttaaaagaatataattcgaaggcatcagttgacttgcagatctatcgtttatttgtgctatagttatttctgaatc  
accataaaaattctaggtttgtttactaacataacgcaaaaggaaaccaaattgttattcttagtataacaatgcactaacgtcaacgcagcattt  
gtggcgcctaaagacttaccagcggggggcgaaccgcaatattccaacttgccttagcctaacctcgttttctttttatcagaaaaataag  
aaaatgtcgaatattacgaactcctacagacgtagcaggaatttttcttttaatttcttcttttgtttgctaaacttctatagcatagggtatggtt  
ttcgttggactgctgctgtgtaatcatagatcaaacgctaattgaaaatagttagaattcattaacagatgcttggatgatttgattccaaggg  
aaaatcccccaactggctatgaaagtcttcaacgtaagttatgtgcctagacaagaccagctcttgattgacattgttagctacaag  
gtcattattgcagttgtataaaagcatgacagaagcttttagctgaaaaagtacgggtctggttgcattcaagggaatctcgatataaccggtt  
ttgtgacgaagtgtggacattataaataaaaccaaattcggtttgcataacgaaactgtgactagcaataagattcggtatcgttgcctgtgca  
acactgattctgcagaaatcgttaataagtaagaatataaaaaatggacagtttctacgattttacttgtcatgaactgcttgcgctgtatga  
ttttcggtattgaaacgaaattattgatattgatagaataacgatttacaagttttctgtccttctggtcaatcgtgtcttcttagctgactgttt  
tgaacctttgatgccttttggataactcattttgagatttttcttttcttcttttcttcttctttcatgcttacaatgatgaccaatggctgttataaccttaga  
ttccctttctgacattgtaattttaaattctacatttctctgactgccttaccatttttctttaaattttcgtatgcactgtggatattgtcgtc  
gaagttcataatggtttattcttctattatgtaatgttagggcacttaatttagatacagcttcttctcgtgaagtttctcaggactttggtat  
cttaccctgactaaagctttatagattgtattataattgattgaatatataaaaatgttggacgttcaattgtccgcttcttattctttta  
atgtatagctacttttctcggtagttcattattatgcgtttgcttctggtataatagttattagagtataagcacataagataaaagtgtaac  
gaacaggaacaataaaataagaatatacgcacgcaggatgaatagagaccttcttgaacgttgcaaatgacataatttttagtatatcagaaa  
aaagttgctcctccgactaaagcaattaagcttgaccaatcaactcgtgcattgaggaagcaccggattcaagtgaaagtggaaccagcagaact  
gatactactagattgctttgggttagtggaaattccttctgtatttcaaacgggctgaaatggcgttagcactagcaatgggctttgaagacaca  
taagcagcgtgttcaaagaagatgaagaactaaagtaagaagaagtttggcagtaaagtctgaagctttagtttagagtgctgtttgaga  
agagaagttgtagtgcagtcttaggaactactagggtctgagctggttgaagacgatgtggaggagctgctgttttggagctagtttaac  
ctgttaataaggatgaactactgcttgaagcgttgggtgaagagatgaattcctccgattgagcataaatttcttaggagattttggattc

ccgattgatgctataacctccaccagttggccaattttagtatcagttgtatagctgccgtccgatacagaaaccgtcgcaaggagctttgtaa  
gggagatacctaaaatagttgcttaaatagattccaacaacattctgtctgattgacataatccagggtatcgtgtgacctcaccagtttccc  
atthttcaaattcgaaggaccgtgattttagttagccatagagtggcgataaaagcgaatactgcaagttttagtagcatcatcttaaatatta  
aattgggacgaacaggttttggtaatgtagaaaactttttagtattcaaggcaaaagaaatcaacaatattataaaaaagactggtcgc  
ttgaagctagcgaataagaaatgcaagtaaagttcaacaatagatgaattaaggaatatagcgaaggcttttagtaaacttctattattc  
tttagtatacgaatgggaaagaaaaaaaggaagtaagactatataagaaaaaaatgtttagtttagattcacgaaacttatca  
gcctaattataaacaatatttagcaccgcccgaagtataatatacccgcaagttttagctatcataaaatgaaataaaaaaacacaaaacac  
acccttaatacaattccttttaataatgatttcttaattgattcattatttcaatgcttttaaaacataaccctcttaaatgctcgggcttattt  
atgcaagacacgctgttctgttggagaataggaggttaagttaaagttaatgcttattaatggctcgttttttagcgaagagagacaggct  
ttgagtttaacttagtaacattatttagggaatgttattatagctttccgtttgctctatcatatgaaaatttttttagttattatca  
ctgttcttataagcagtaataatagcgaatcgtccaatgacgttacctgcatcagggcagaataaacggacattgtaattataagccgataa  
cagacgattggcttttagctagagataaaaaatagagcatttttaacaataacagctctttcaaacaaaacactgataagaagattctactgtt  
gaggtaaacaactgctttatcaagaacacttcaatttgtcaatcagacgtatagctgtaggatttctgaagtataataatgaatagagctcaat  
tcaaatcaatcaaacataaaaaataccataccttagtctattctcacttcaatgatacccttagtattattcagtaacaaatagacgctgtaa  
attaatagaaccatctgtaggataatgtaggttaacgatagtgagtgacgcttttggcctcgggaaatattatagtaataatgctta  
ttgctttcttagtggtagtgaagttgctgcctaatttctacattaagattatagttataatcgtatggcgtcaactccttataactgagcatga  
gcatacagagaacgcgtaacttttattaaatttttttttttttttttttttttttttttttttttttttttttttttttttttttttttttt  
aaatagatattgattgaaatgcttcaattacgttgcgagcatatagcaaacggaactgacctgactgactacatttctcctctacacca  
taggtttgtttaagacgctaaacaaacttttatttctgaaaaaggacttttagtaataatagagggatttaattttcttttaattttat  
acaatatttttcttctgactagaggtcaacaggctgacggttaattaaagaattttttggttcatgatggaatttctccagatcaagcac  
ttctgaagagaagaatacttacttcaagttgaggttagatgaacaaatgatgttctataaatgggagtcctggtgctccagcgggataata  
agcctgtcctaaacttagacaactttaaagcatttccgcagacatgagaactcaatggagcgcaggttagagctacttacgagacaagcca  
gagaagaaaaccacaaaaacaaacttggaaatgaacttgaataatgtaaggcgtttggttacttccgatgatataacttttttaggcttgg  
cttactgctaaatcccagactcgaataatagcaactcaatcatcccgtcctccactcagatgcaccaagtctcactgatgagtcggccg  
gttcttgaagctcaacgcacataaccctcgcatctactaacgtaatggttaaaaaccagatcaactgaaataacatcaagattgatcc  
gagagcataccattataggtatgcttcaaaaactccaagattcgtctgaagttcttgacgaccgaatcgtctttcagcgtatagtttgcgat  
cactataagattgctgatgaggatcttcaaatccaagtgaacttacacaggaatggttaccgtggtagagctggtttagtagcaacact  
gttggaggagccttaacactaatagcatttttagatgaaactcaagaagactaggcgtggcgcagagtttcccttaagttagatgaagttct  
agtactccatcttctggcaaaacttctgctttaaaggatccaatcttagtggttaaaacttttggctaaagaagtttacctctacctctctc  
cattctctgttcatctaaagaagaattgagaatttaacaacaaagcaaaccaaccatttctatataatgctgcttctggcttctgtctct  
cgagatgatcttctgttacccttgaagccttagttcatattgctagaaaaatcctattgattgggtattttaaaggccctttatagatatca  
accaccctatccttccaccggaatatcccagacacacaagttacttcttgaagattttttaaagaactggttctccgatcctctctaaaatt  
cttgaagtgacttctctgcctcacatcaatgatgccatttcaatcaccctgcttggcctcaagacacattcgatcgccatacactaggcctcca  
tctgtacgtccaagttgattcttttagttagtattaacattatagaactttatagtttccaaaccctttagtctttcagtgaaatgaagttgattcg  
gcatactactaacgacattctgttacatacttcaaggaagagctttccgaacaccaaccatgggaacttttctccgattagtagctcatgt  
aatccagcaaaggcattttacccttattccagggtggttcttggacagaggttaactcctcgaatatcgatattcacatctaaacttggagagc  
tatttaaaccgttctgatgtcctcatttacctagcgtatgaggtatttgcaggttaagcttctcatatagcttgcattttaaactggttatt  
tttagactgctgaaaacgttatatctattaatccaggaaaagcgacgaaaggagtcggttgggatcatttgcagaaactattcttcttacc  
ccttgattctcaactccttagtgaccttctacacaatgctcagctcgtactaaagttgagataactaaagtataaaccattacttccgttctt  
tcatatcacgatttgatttttagctacagtttacaattataatacatggatagcaactatgattcatttaattcattagttacaatcatcgttcttt  
aatttatctgtaagataataattattaataatattgtcccgagaaactctttatattatatttagtattcgatcattcctatcacttctgc  
aacctcatcataaattagttcaggatgctgtgattcctcgaacaattagcaccttcaagtaacaaaacaatataagaaacttacttt  
gttggctcatgtggatcatgaaaggattgaacgattttgctacattttctacataactaaccaagcatcaattagacaacttagctgatag  
cttttggctacaaacggaatcattttagtaacttagcaggaacggttcgatctcagacttctgaggatgaaattactagaggaattacgatg  
aaatcaagtcgatttctgttctttaaattatttagtgaacacagagaaagggtgttgaagaaagattacttaattaatcttattgattctcctgg  
tcacgtggactcagttcagaagttcatctgcttctgctttagcgtgagccttcttattgatccgttgaaggagttgagcagcaacaat  
caccgtcctcgtcaagcttgggttagatgaattaaaatgatattggtcatcaacaagatggatagacttggaccgaactcaattatcaccatt  
gaagctcattatcatttctcgttattgagcaggtcaatgctgtaataggtaacctttatagaggggagttatgaatttagatgaacggagg

aagaaactagtgacgagggcatttatttctctcgaacaaggcaatgttattttgcaagcgcctacgatgggtggccttctttagaccagttt  
tcagatttttatgagaaaaagctcggattaaagtctagtgttcttcaaaaatgcttatggggcgactattttggatccaaaaactaagcgatcc  
ttcaagcaaaacatctcaaggtcgacgtttgaaacctttgtttgttcaattgttcttgataatattgggctgtgtacaattcagcgtttagacc  
gtgacttggataaaatgaaaaatcgtgaaaacgctaaacataaaaagttcttctcgagacatgaaatctaaagatcctagaattgtgctga  
gcagttttcaacaatggctacctctgtcaactgcaattctactaacagctattcgaagattcctgtcctatagacgcgcagaagatcgcgcat  
tgaaagtgtgagaccactccacactttgaaaatgttgatcaaaacatagcgcgctatgagtaactgtaacgctaaacaaagaagaaccaat  
gctagcctacataagtaaaatgggtgcttctgaaagagatctccaaccagaaaacgtcgacagcttactgccgagcaaatcgtgactga  
gacaggctaaattggctggttcttgaagactcgggggtgtgttcaattaacgaaaatgaagaatcaaatgaagcagaagagaattcggaa  
aaatagatatgttaacgaggaagaagaaaaagatgttttgggtgttctcgtatctacagtggaaagtatttctgtaggtcaaaaattcagttt  
acggtccaaagtacgatcctgcaaaaccgatgagcatattacaaagtacgattgaatccctatacttaattgatgggtcaagagcttttgcgc  
tagataccgtcccagctggtaatgtatttgcattggcggttggctggaactgtattaagaactgccactctatgctctgaccgggaggacaaa  
tttagtggagtaactcagcaagcggatccaatcgttctgtgtgctgtagaaccaatcgccttaccgaaatgagtaaaatggtagctggattaga  
aatgttaaatcaggcagatccatgtgtcagattcggcggaagaaaaatggtagcatgtaattatgtgtgctggtgaaattcattagaacgtt  
tctcaaaactgctgaaagatttctaaaatagaatcaatctcgaacctattgttcttccgtgagacgacagttcgggatcctgatatg  
actgtaaggacaaggatacacaattgggttgaagtagctccctcgcgtctggcgagtaagatcggaaattctgttacccattatctagc  
gatttagtgaatttcttattgaatcatgaacacacaattgagttattatgcatcacattcaaaagaaaactagaatggcgatattgtttgctg  
atctacagaacagaagaagaatcttagttctgaagactttataacaagtattcatgacttattagctaaggatgcatcagataaaagcaac  
cttaacgaataccttgactcaattatgcttttggccaagacgcgtcgggtccaacatcctaatacgataaaaactggcttaatagaaaaaggcagct  
atgaaagtgatggatcaagacttattgccttctcgtgagtatatcattactgctttcaatttctactcaacaaggaccttattgtccgaa  
ccggtgcaaggcatctgttctgttactcaattgaaataggagataacggagaagagaatgaatcactcacagtaataatccgagatccc  
tggtcaggttatttctactgtactgagcagttaaacaaggattcctgctggtcacaagggtgttactgtctatgtattcatgcatccaag  
ctactgctgaagtttgggtagagtgtatgggtagttgccaagagacgaggtcgcattgttgacgaggaaatgaagaaggaaactccattttta  
atgtaaaagctgtgattcctgttgaatcgtttgggttcgagctgaaatctaaagcgtacatctggtgagcagatccccagctgattttccatg  
ggttgaaatgctagacgagaatccattctgggtccgactacagaggaagaactagaagacttaggtgaaactgctgaccgtgaaaaatagcc  
aaacgctatatgttagatgtaagaagaaggaaagttactagttgaacaaaaggttattgaaaggctgaaaaacaagaactctaaact  
aaaaataacagtgattttttgaaattacaagatgatttggaaattatataagcagttactatttctgattttttagtgaaccaaatacaatt  
tttagttaaagaataaaaatatttttaataatattgttacttatgctcaattgtattccaacagaaaatacgttcatgcttctaaaacacatgaa  
gcatattaaatggaagttcataacttaaaaagcctccatagattataaattataaacgttattaattatcaaaaatttaataaagatgctgctc  
gcttaatgccgtaaacaaaaaccactactacgctgttagaaatttgcctttaccagcggttatcaatgaagcaatgaaaaagcctaaatgaaga  
tattgagaaggaaaagaacatctttagatatacataatgacgaggatgaattgattatgaagctacattaaaacggcgttggtgacctcag  
ttctaaagtctggtcaagagagtgtggatcaagaaaggattaatgagattttatgaggatccaaggagtaaatattttaggcagaaacag  
aaacgagatctgaactcgaatgagaattgagcgtgtacgacaggaggtaaaagaatattaccgtaaaactgaacacaataatgctttcaaa  
aagaatgggctgaacggactgatcagattgacacctatagcaagagctccaatcttctgctgacttaagtcaagttattgtacatggtgctg  
acgcttttacgctgttgaagaactgagaatgaaaaactaaagaacatccaatggccttggtaaagggttttagtaaggcttatttta  
ggaaagcgaattaaagcaacaagtaattacataggtactgcaactacatggctagaaagttggcgttcgatcagcaatgccagagttattg  
caaagaagctatgtccagagctagcttcttcttagacattccagagatgagttaaatcaaaaggaaatacagaatttacttctggaatag  
accagaatcttgtccagctagattgatgaagtgtatgaattgactccgtatagcaatgaataaaactaataaagatgaggataccatgc  
agcaagtattatggaataagaataaggtcctgaaaattactggtgctcagcatcagctgtggaatcgtgcttaataagttattggcaaaaat  
gctagcaaatgaagaagccgaatgatcaatatctggtccaattgaagcagaagtgattgaaaaattatgtcaaaatggcaacaaggagag  
taaggaaataaattaagacctttctataactaactaactaacaagatcaatggaataggcagagattggaacaggagcttctcgggctag  
atatcgaaacctgtggagacatattaataatagaactctttgtcatacatcttagagaaaaaaccttcagaatttaatacaatgcagcttag  
gattgggtcactattgtccaggatttgggtgacagctatagaaaaagcattgggtgtgaaataacatttccgaacgctattgcttctggaggtctcc  
tagaaagtgaagctcaagccctatgtcaaaagtttagcagagagttatcaaaacgagatttgattgcaattctatagtaaaaaatacaaac  
gatactttcaagttcactagacagaagaactacgagaatacatattcaacgatacagatctttctcgaagctctgagattattgaggatg  
gaatatccactacgaatacggctattgggtgttcgagctagtaagttactaataaggcaagctacatagcttctcgcattgtatgtaaacgtgc  
taatctataaaacatttttaacgttctagaaatctcgaacaaaacagtttctgtctgttctgctatagacttaaaagatgacttggctgt  
tgtgaaccagcacattgatctttgctaaatacggaaactgtgaagaaggtgatcgaatgaaaagaagaatccctcaaaaagaagcgc  
gaacactatagatgccttttttagacattaatttccatcaaaagacatccatataagaatggagtttaattacgttttgatacaaaaaggacagc

aagtgtacaatggaatgaaaacaggtcaaaatattttacgttcaaaatataagaattgcttatccattggatttcaaacagactgataaccg  
attcgtataaactcatgaaaaaacaagaatctaaaggctattctttcaagcatcattattacaagagctttgcgctgataacaaaggcaatga  
gtataaaaactgtacttataaattggaaaatggtaatgatgtccagtaaaagaacaaaagacctcagcggtagcagcgagataaaga  
aaagaaagtggcctaatagaagaagagacagaatatacagatgtcttactagagaactgcatccaaacgccgataaggacaacaaaaa  
gcagcaacagcagcgagcagaacaaaaggctcaagaatatttagcggcttttggaggagcagcaaatgtatgaagtatggttaggttggggagac  
gttactgcttcggtcgatgttttagcattaaaagcaggaaggaacctgagtcagagcagagatcctaaggaaattgaggaaggagatgcat  
caccgaaagaacctgattaaagtgtcagaagtcctcctcactttggactatctcagaaggaagctcagacaaaaggctaaaagtgtttaga  
agattcatatattaagaacctgtttcacattaattcaagcagattcgttcacgtaaatctgtgaatgaggccttttctaatacgtaccaattta  
agactgcatctccatttccctcactttcacggggtaaacgatcgaatactaggtttcttttctcactgaatactatatgggcttggtaggggaca  
gcagcttcatcatcaatggcagaggtgaattgtactaccaatgatcctccagagaagagctctatctcagtaaaagtgttaattcatcaaatctaa  
caaaaaacaaaattagaactcgtgtctacaagcagtttctcaataatttacctttctcggatctgtcttaaggatttggtagggctgagaagctt  
gagaacaccatccttagtattccatgagctgcaaaaaacaccataaaaaggcataacaaagaaacgaatgaaattgcctcattttgtgtatc  
cttgggattttagtgggtaaatgaaaccgaatccacatactgcttcagatataaatagcagatcctaagtatcggtaaaggagatgatact  
ccacataaaagaacgaaaatacctacttccctcactgctaaactattcgacacgcgaaaacccgacttttacctcagtttggtaggattcgtcc  
caaggaccattttttgtttttgtacgtttctgaactgttagttgtgtctgtgaatttggccttctcaatgcaattgcactttgtattttcaca  
tttgcaaaactcattccgtgctggaaggcaatgacaagcgttccaatgcaagcgttttagaattgagtctgtcttataatcatcaaggattc  
attagcgcattcaactggtcatctcaggacactgacttggctcaccaacaacagaggcaactgtgtaaggaggctatggttgac  
tttgaagtatttgaagggaagcctgttatgcaatatactcaggagatccaagccgagtcgtaaaagtatacatgaccccaacgaactaatga  
actttgcaagaggaagaacagtttagctttgttcaggactagagcctgccgagatggctattgtagaaacaaaaaaggaaatcatgggagtcga  
ggcgcctattcgtgaacagctggggcggcagagattatgccgggtaaaagtaaaatcaatcatggaataaaagaaaaaagcaactgtgttcct  
ttctacttctttttccaagtgtctcatatcatgtttatttcttatgagttcttatgtgaattcttcttgatattctctgatattatggaattgacg  
ttaaactttctatataatctttgtacacatcccctttacaatactctcgacaaacataagacactgctttgctttatattatacttctgtatc  
tacctaattataatggaagagcaatttgcagtcacttactacgttcttttctcatatgtcaggttaactgtataacagtttaattgaatattata  
taaactgtcgataaacagccttccccttcatggtgtacagcaattcaataaaaactacttcaactcattcggagactcgtcaatccacaaaa  
tgcaattgtcgccttactttatataaccttacacatactatcttaactgttattgtatataatattgttcttaacttacaacaagtcgcggtg  
gtgtagtgggagcatgacagactgaagatctgttggctaccggctcgatcccggctcgcgacacttttatcttagatatttttctggactttat  
cccatttctgctgtttcagaaaatgaacttaattgtttcatcgcatttcttactgtagaacaagtgccatccatcgtatacctgaagatagcc  
tagtctaattgaggttgacattcgtatttcaacttaaatgaaatcaagctaaatttattatcaatagtaacttataatgtaattgttcgctttgatctt  
ctggccttttattgtgatactcaacatcaccgtttgagtcaccttgaatggcacgaacccatcgtacgcaactctggataactaatttattttgc  
ttacttttggaaactaaacaaaatgtgaagctgttttctctatttttaacagttcctctcagtgaaattgcatagtttacagcaaacatggaag  
ccgaattcaaaaattcagcgtgacttcaggagcaacaggacaaacagaaaaggattatccgaatttctcgggagatcacaatccaaagtaa  
acgaatgattttctgcttcatcaagcatcatcgagtgagttccctatcattggatttgcacaagcaaacataacaaaatattcaaaa  
acaattggaactgttaagcaagaactagccgtcccggatgctgaacgatagctccttctgctcctggaattcaagagtttgcgaagcctat  
gcaattgaacattggctgcaacatcagactcttatacccaaaaagatagtaaatccagatagatattggacttctgattatgtcttaggagttg  
cgatagactggtgagatcatcgctttctataactcacgggtcaaagttcgtgttgaataatctttcagatgttcaacttctctgatttaa  
tttagaatgcacaaaattaaacaactgaaatcgtgttcacaaagtgaactaaagcaaaaactgggtgaaatggacaacagcatttcaaaagtg  
aaagcatatgttacagcaaaattctcagaatgtctgaccaaacatccatgaagaggacgaagaaattatagcttcaaacagaaaaagcttcg  
tattcattagatccacgatgactatcattgctttgcatgctgagagatattcaatggatgagataaataaaaaaagactcatattttctcaaaa  
actatgaatcactaactgaaaatctacaatattcaagaacgagaataaatataaaacataaaagacggaaaagaatgtcggaggaggtt  
cgagtgttaactataaactcacttccaagggaaagccatggagacaggcttatgtcgcacgtcccagatacaatgggtccgtctggaaaaac  
aaataacaggggaagtgttcgagggtgtagcttccgtagaaagctggatcaaaactaacagaattgtgacactcctagataagctttttctgc  
tttcttattttctgtaattcaagggccctatattgcctagccatattctgtatgtcggagaaaaaccccttataacttaacttaactgactgattgctt  
ggcaataaaataggcgggcttccacgcatggttaaatcaaatgtcgaagagcaaacgactttgactggtcttagaattgtacaatcacattg  
ggaaattcaacgatagccaacaaacagaatcacggattttaacttcatcattataagtcttattggtccattcaactggtacaactgctt  
cattaggttaagtcttacattgagcggaaagttgaccccaaaaacctcagagttgtgtcgatcagccgcataaacccacttctggcgttttcat  
atccaagtgtaaattgtgaaaatgaagctgagctttctaaaactatcgggtgcatttgattcacgtatccatcatcttgagcaatcccgtctttt  
ctactcggcggataaataagggtcactcataatctgaaaattcatctgtagttggataacagaaccatacctaattggaaccgcttctacaga  
attattcaagatcccttctgtggtgctctcgggtgatgagaattagatgaatcgtgaagggtgccagccatcactccttaggcaaaattgccg

athttctaattgttatathtttgtgcaaccgtttgcaathtattcggttgtaaagacttatgacggaccggaaacgcagtggttatatgactcacctt  
agathtttgtgccthttttggccggctttgatacaacgtcaatagggaagtcaccaaattgcgatactctttggccgtaactgtcgaacaaatcg  
atggaaagccttaagathtttgcactttgcagctgtagactagatacatgcaaagatcgaaaaccatacactgttgattattgtathtttactga  
ttgcctgtgaatactggccttcttcattcataatagagatctcaactcgaaaggataagccaagcaaagattgaaatggaccatctatcatgagga  
cgggaggaggcaaagaaatcthtttcagaaccatacgtathtttggatgacggaggcatgtctacatgagathtttatcatttggcttctccatct  
ttcattcccttgctagcatcattcaaccaaaggctcagctccttgathtagggttgtttggcagagcaactcgathttttgcataatgaggtcgttata  
gaghttttgaacathtttcatcttccatathtttctgttttctgcttctcattcatctgaatatgtgaaaggctgttaaaaaagtgacccttgggtc  
atcttcgaghtttgctgtacatgacgagaacctgtttctgtcthtttccacattagtaagcgtgaattaacagcgtaaataaagaaaggacttga  
attggcatgcctcagathtttacgttttggctatthtttgatccaaatcaaatctccgcaaggattagttcatthttttaaghtttcaactaataaag  
caagttagaatcgttgccttgaatatacaatgaaaccataatctgactctggtctttgatgaataaccagtctatgtgtacatacthttttagatt  
atccaatgtgagagagtcattttcattggattcaggtathtccagctgcaaaaactgccattatagctathtttggcaghttaaccggagtcga  
ttatctttagttagaacctcaataaagcatgtgcactttcataaactcaattgtctataaattgtctataaatacattaathtttctatctgaaacg  
agagaatggttgccttgcgaagcgaacgaaggtagtagttcgtaggcaathtacaataaccaagtcaacthtttcttccaactactcgac  
agacaagaagccattggaagcggcgagaaagttacthtttaatacaghttttctgttaaaaaataaggaaaagatttgggtgacthttttggctta  
atctcagtgacthtttggattacgcaghttaagtgattagggccattgaaathtcgggacgatggatagtgaaagaaatactctatacaatata  
atcaagatgtatatacaaaaatagaagacatactagacacathtttcacaacathtaghttttgaacaaaaagctggcgaactcaagtcag  
gacgattctacactcatgttaaggtacgtathtttathtttataatcatttcttataacthtttggatctaghttttacttacttaaatggattact  
aaaaaacactcggatgacthttttctgcagtagaaaagaaaaatcataccthtttggtagaaaatcaggaaggactgcctatttggacattc  
acgaggaagttgatgaagatggcaatgtaataaatacgaatgtaaagcctcaaggathtttctccgttacagattatgctgatgtgatacgaagtt  
tgccaggathtcaaaatcctaaagaaaaagctacaacgccttgaagccttctgcaactgaactaccggaaacaaggattgaggaattgccagc  
agaagcggctgcagctactggatcgctggattctgatgaacaaattaccaaaaagaacaatacagaatccaagatagagaaaatgcatcca  
atatatacagcaaacctcagtcggattatgtcaaagagaaagcatctaccatagaaaacaaaaccgaccttacatcgaaaaagatagaagaaaa  
ggaaccagaaaaaagctagatgaaaagaaaaataaaaagctgtcttcaaaaaggggttctcttaaccctaaaaacggatctcaaaatcg  
ttctcaaaaggctaaacgaagaagaatcaaaaagcaaagtcaaagagaagaaaagaagcgtatagatgtcaccgataataacgctgtaa  
aggaaaggttatggaaaaaatctctcaagaatcgaatagtcaaaacaghtaaatcagagtcaccattaaatcaaacccccataaaaaact  
gtccaaghttaagaagcgaagctccagagaagttcaccaggaagatatacactcggaggttgcgtaaaacgaatccacaaggtcagaaac  
agatggtacaatggctgagcctactaaaaaagttgataghtttacatgaagaagataaataaaggaaagtagagggtgctttaaagcaagtt  
ccaactctactgaagatagcattgccggaacctaatgacgaagatccggttatttgccttaccaacggatgccaatggagaaagtataat  
gcatgccgttcaatgatcaggataaattcttagacgacatggagcagctcctcaagataggaagaagccggtgaattgcagctgacgcag  
agtccaggtcagatgaagacgagcatggtatgaghttaathtttctgaaathtaatcctcctcaaatcaaathttttggtaaaatgaatc  
attagctcaaaaagttgcttctggatcaaacgagcataaagagaatgcttataccaaaaagaacgcaaccttctgaaaagcatgtgacthtttc  
tgacacgttagaaattaacatgtagcagaaatggaaaagcacgcacatcgagaatgtactactcctacagaggaatatgacaacatggttag  
cctcatgaatattgcagcccatatcagcgtttcgaaggcgcgaagcaaaaataaaatctgaacacaaggataaagatttcgagctcctataga  
aacacacaaggagacaaaagactactcgatcatgacactatttggagcgtcttctgataatccaacaacaaaatccgatcctgaagaaaa  
ctttccgatgagcaaaacgaagaaathttagtgagaagtagctgaacgaagtcctacggtagaatctaccgttgtgaaaggcaacctgcaa  
gaagtgtagcaagcgaagaggathttgaggatcatcaggathttctgaaaggataaaagagaatctctcaacgatattacgaactccggcg  
aaagctaghttaaccagaaactgaagacactgaagaggaaggtgtgtaccggtggacgaaaatgggaacgagcaaccaaataaghtaaat  
ttatggccctcagctgggtgtaaatatgaggaaataataatgaaagcatttatacggacthtttggattatagatttagattttagttatct  
caatataatactctgtactgatttgcgttactgtagaagggtctctattaataggctcgtgctgaatatgttttggaaatcgataacctctc  
gtatacattggattttacaaggagagcaataagtcgatcaaacctagagctattccgcatcgggtggacatccacttcgaaaacgtcaatta  
gatgattgaatgtgctcagttggtattgtttgaghttttaaacatgttctaggataaaagattgaagttcaggattgtgtatcgaaatactccgct  
cccaactctacccatttacaacaaatcataatggagagctcgaacatcaagggttaggagagagattatgtaaatctttaggatgaggagc  
agtgaagggtaggtgagtagacccaggactccgaghttgagtcggcagcagaaaaaggaaagtcacaatccatgtaaatctaaagc  
atcatcatcaaacgtggacgctgacattgacttcaaaaaggtcatgtaagagtggttaagcctaccaaaaggggtcgtacctgaggacatgt  
gaacagggcattcgtatgaaaaggtcaactcgggacacagaccaagttctcattathtttttatgtcgagatgcaggtgttttagttgtgga  
acctttgagtcattcggataattgagaattagaccgaattgtcacgaaggaaacgccttgcctactgttcgacaaaagagcgtgctccgcat  
tgcttagtaacthttttacathttctaagaccaagactcagtgcaagcgtcagatttaggaagaaaagcgtcaaathttgcaaghtaaatcgta  
tcgtacgtcaggctgtcagaaccataaagttctatagcgtcagcataagacatacggggaagagactttaaagggttttcccagatctct

tagaagccgggagaataatctttcaattacgacatgacctgttctggagaatcaacaaagctcatttccaatcaatttgggtaaactctggctg  
cctatcgaaacgtaaactctcatcacgaaaacaacgagccaattgataataatttccaattccgctagccattaatatttggttgattgctgaggg  
ctttgggtaacgcatagaattaccaggtccttgtcgagaaggactaaaaactcacgagcgcttctgggtgtagattgaaaagcaatggcgtt  
tctacttccacaaagtcattcatatgaaagaaatcacggacaatatgtgctatattagatcttaccggagataatggttatatttgggttcgaa  
gttgatgatgacgatgagttgtaacaggttagactagatttctcatcattcgggacaaaaggaagtgaatgagccatatttagcactccaagt  
tctcgacttcaactcaaaactcatttctggctcgcgatctcgttcaggtcgatactgcagtttggcgggtgatcttcaaacactctctggagaacg  
gtttggtagtagtttcttcaaacggaagaacaaatctcgagcgcgacggaatcccataagcttctgctagctgtttctgggaacttgca  
agggctcttgggaaaatagctgaagggatttgccttgcacatcacgaagctgattaaactgatggatttggagatattcgattcgtgttacaag  
ccaaccggaaatgctgatcaccttcccactaacgggtgtaatacatttgggatttatgaaactgcattcgtagaaaaaaggattattaaaaa  
taaaaagacggtagggaattcttccaaaaatgagttctaaaagaaagccttgaacctcaattgaaaaatcacgacaaaagtacactttttat  
aaatagtttacgatagcattcacgacaaaagcttttaggaagctttcaatttcttttaagattaacaaatctacttattcacgaaaagcctata  
tagctaggctcattctgtaaaatcaatgagcttggtagtagtgacttgaaggatgaatccaatattcatagtgaggcctttattacataacat  
gtcttcaaaaaactaagataatgataatttggattggtttttcttatggaagcagagattctttacattcatgtttaaattgatgaattgtca  
tttatgcccagatgctgttacaaggataaatgcacgaacatgatggttaatttaagaatagaggaaggaaaatggttacggattgaagctct  
caagctaataagctgaagaaagctaaactaagagttggtgaaccataacataaattcatattttaaaggcgaacaacgacatgtagatgaatag  
aatatgttacgaaagaaagatgataaatgaaatgttatatccttaaaataatgatcacatttttgcgctttatgatacacagtagttgatata  
tcataatgcttatatctacttgatagctttatcgatattgcattactaagtttgataaaaacatagctatacaaaatttaacaatatcgttacg  
gtttagaatatttaacataagcatattcgtatttttagcgcacgtctgaatcaagctaagccaatcacaatagcatgtaaggaccagctacgtatt  
gtggggaaattccatttcaacttttgttactttcattgggtaattatcaatggagtttctattttttcttgcctataatattttatcttttgata  
aagctacatataataacgaaaactagtttcatataaatcaagctccgctcgatgctttgtcctagcagtagtaacattcgataacgttttag  
gtgactgaaaaacaagcaaccgaccttaaaagaactgcaactgtttccctccaccacaaacccatcagtttgaaaggatattctttttt  
ctttctttccgttgaaaacgtcgaatgcgtttacgacctcaaccgtaacttaatttcttctgttttttgcctattggttagtttgaatatttctgta  
ttttgtccagtacaagaattttgacattaccaccttgcgaaggtgcattgatttgcattcgaagctgatagcttttttgcattacttagattt  
ctttcgtttctggctcctatcgggacgcttgttgcctattttaaagaccaccgaatatttgcattatttctaatacatcgaaaagtagtactatta  
ttctttattttaaagcatttagacattttaaagctatcttttaggttttcttgcggttctttttcaacctttttatttggatatttgcctcttttgtt  
atcatgctgcccctgcatatcctgctgctccaccgtgatctattttagattatcggaggtgcttgggtggaacacgagctctggatactgcctgc  
agtcaaaagtagagaagatactcgacaagcatagttcgattttgtgacaccactgccacagtcacgaaccttgagactgatacattcgtactt  
caatccatacaaccatttagtcagactcgactaccaccaaacaatgacttctactcctacgacgacttctgttattcatcgattggaacaaacag  
atcctcatcccgaacttcaaaatgtcatccttatgggtggaatccacaaagaagatggccctctcatccatgctaaatcaatcataaa  
aaaccgccgaatcgccgagcgtcatggctacattttgaattcttagatgaagcattatgcttcaaagttgccggtcacttgtcccatgg  
gttaaggttccatgcttaaggatactatggacaaatatcctaagctggaatggattgggtggttgatcatgatgctcttattatgaacaaggacg  
caacctcgttgattacctccttgaccacaataagcttaatagcttttaaccgtggggctgaatataagagtggtgctggagtagactctgatgg  
ttttcgtgcctgaacaacaagaggctgaggatgttcaacttattatgtcgcaagacttaatggaattaacgcaggaagcctttcgtccgtaac  
agcgaatgggtcgtggatcgttgacatgtggtttgagccttgtacttggatcattcaagggtatgctgaacagcaagcgatcacatatg  
atttattatcatcccagctccatcaacatgttggcttcttccactccgcagatcaatgctgatgactttgaggatccctggggttggaagcgg  
tgatatttgcatttttctggttgaacttttccacaattgccctgaaaaattgagaaatttccaagatacttccagtaagcaaggtgatg  
attggttagatcctgaagaaaaggagttcatgaagcagaagatgtctgctcatgattaatccccattaacattgagagtttgattaaattgggtt  
gtgataatcgttcatatttaacttcttctataatctacaaccttctatttaatgcatggtcattcgaaatcctaaagtttcttggaaatattgg  
gtttcttacttgcacttatttataaacgtccttctttagacctctttagatttgaatgcttcttgttcaactcttaataatagctattagttt  
ttagtagtgacagggcttctgatgtactgacttcaaggtgaattgcaacgagcgttaagttgctttcgtttctcagaatgattaattgaa  
atacgtcaagcttttgaaccactaaagcaaaatgggttataaagcagatgagaccgaaatacttgatctaataatgactgaagaaagaaagttg  
caactgggagcgttcaagatgctcgtaaaactttaaacagtttgaatattagatggtctcaatgtatgcaatacgtttgagaaaagcaaa  
taattgatcatgacttccagaaggaatacttgagttttagcttattgaacttagcattgtaactatagtcagaaagcaatccttaaagcaaat  
tgaatcttagattcatgcttttaaattaggaattcaatcaaatccaaaacggtaataatacaataccccctccaagctacagaaaggaatt  
aacataatttactgtattattataatcacaagggatttaagatgaaatttggcgttttctacatagtaactgctcagactgttcccagagctaa  
gctctaattgtagtagtaataatgcttatttatacaattccctttatgtgtctttgagtcgggtctttataaactcaattcagctacaaaatagaa  
caagattcaactgaaggttacaatattccttgaataaaagataaattgatattcaacatcttgaatgcatcaattcaacaagagacgcttct  
tcttaagatttttggtttctcatttaattcgttacgaacttttcaatgaaccaacaagcaacaccaccaaaaaaaacttctcgttattatatttc



ccaagcttgaatctattaataaaatcattttgataactccttctttttattttagcgacattttgccgactacttggatggactattaatactttgc  
taccatccatacttccagaattgcaaaatcgcatcgcaacttaattcgaaaaactttccatttactttgaaactctgaaagccttactaaaaca  
ttttgctctgtctgtctttcaaatacttctgtcttcatgggatccatactctttcaattgtaaaaggattctgctcctaaagtcacaaaaataatc  
tttaaaaaatcctataaaactttagattcctgggtctaattctctgaacacataaaagccaaacagggccggaaattgtttctgcagaatggacat  
cctctatgcagcctccgggaattattacaacgtcagttcagagataaatcaataaattcgcttgcaaaagagtcacctgtcgtttcaactatcaca  
aacttcgactccttgggaattccaaaaacgcatgttagtaggagtaaatctgatacctactatgtggacaaagacacatgcttgcgcacgcatac  
atcggcacatcaattggaagaattcaaaaattggcggaaagtaagatgtcgaaaaaggcttctaattaccgcagatgtttatcgacgagac  
gaggtagacgctagtctactatcctattttcaccaaatggaaggcgcttatttgggataggaacgataaagcaggcatgttaagagatctaga  
gcaagtaaagcttgatagcgatttcaaaagctgttattgacgaagcaactttgaaagatcataatgacttacaagatatatacttttaaca  
aaccagattgcttctatacatttaaaaaattccttagttctgcattcacaatttagtgtaatgaccccagacaatggacttgataaaagtcaa  
gttcgctaccgctggagctatgattccttccctttcacgcaacctctttcagtagaaaatttttggaaaggagcatggctagaatcctgggttc  
cgggtgttctgtgaaaaatttcaaccaagccggaatccaaaatcatgttggctgggcttttggatagggcttagaacgtttggcaatgatactt  
tacagtatactgacattcgtttattttggacaactgatgaccgattccataaacaatttactccaaacgaaatcactaccttccagccttacgta  
aatacctttatgctataaagatatatcttttggattgatgagtcttttgcagctaagacttttgaactcgttcgagacgtctgcaaggactgg  
tggaatctgttgactgatcgatcagtacacaacgaaagcaggaagaacaagtctctgctatagaattaattatagaagatggaaaaatccctt  
aaaaacgaggatgttgacttactccaagttaacttcgaaaagcacttgccttctctaaacatccaacttcgctgaaagcgagacaaagaaga  
tcatcattactcatattaatctttgtaataatataatattttatacattaaccccaaaactctaaaaacgaaagaatgcgtatgca  
gtaacgagcgatcattaacacaaaaataaacggaagttttaacaaaaacgaatgtaacattataccaaccacatggatttagaaatgaatag  
aaagtaaaagttcgcaattggctattttactgccagagttcactactagaatttaagtagagtagccaactgaggaatgacaccttttcttaga  
taatgaacagaattagttgcttttctagaacagcactcacaagactgtgcaaaaagccatcaatgcgaaactttgaccaacgcatctgagc  
aagattaacccaagctgtagacagatctagaagctccacagagtcctttattatacttgcctcaaatgagggtgaaaaactgttcaacatc  
gttttcttcttactcacaacttctgataaacaagatgaccgatttgcagcagcattcgaatcttctcttatactaatagaaccattctgc  
aacgtagaagtttcaagaaaaatctcgggttttagatcttgcataaacgagcattaggttgaacaaaatacgcctgggaatagtcct  
ttatgtcctggatggattaccttccgtttatgatcttctttttagactcttttgcataagcagctgctacaagttcatctattcgggtcaacttgc  
aatgtaaaataccggcgaggtagagagcgttgaattgcaaggatcacgcttttggattcatgcatagagtaagtaaatgcaaaatgaag  
gtattttctcttgattccaagtcggttccacagaacaggagacacagcagctaaactatcttttggatagcagaaaaattctcgacagcaattc  
gtagggtaaacgctcgagcaacgtcaattttctgtcagttttctccaacagtagtttagcccttgtttctgtattttcttttggactcatcatgtttat  
taatgtgttacgctttttcctcaattggcgacattgtggagcttcacagaggatgatcaagtagaagaatgattcaagtagtaaaaagaatta  
tatatacttggttttatacactttaaaaaagaataaaattgcaaaaatcatttcatcccactaattaaatataatcagtagtctactttacatcctt  
caactgtctattatcctttatcaatgtccattggaataacaataaaacacatttgagttaaatttaattatcaattcaagaaaatcatataa  
atatcgacataaaaatgaaaaacaaaatcttgaaaaacatacacatgcataaatagtaagaagaataaatgtacattgtttggcgtcttctg  
accatgaacgaaacgaatgagcaagatgttacgtttcccttttcttctccttaataaaatcattttcttctcctgatactcgttgcgtag  
gtttgtgttacggcttttaaatcgaagcatgtcaactttacccttttaattttacttgggtagaggagatagcaatggaattgcaaaagggtaag  
tctttgattccgaagaaaacgctgtatgggagaagaggatattgtttacgaagggaaacctgcaggaacttttctcgtggagaagaagaagg  
agatgaggttgaacgttgtttcttttaaatgagcattgctgtcaggtccaccttctgacggttctgtatttagcgataaagattatgaaaggt  
ggttaaaggattcaagaatttgcagagatagaattttaccggtttagttgtaaaggagaaacaaagttcccgcacgacgagataagggtg  
cgtgaagggttagaagttgtttttagactagttggtaatgctgatgaacaaagccttttgcgaggtctctacctttcccttgcctttgattatg  
aaactgtttagattttcgtaaacgaaaagtcgggttcgaagagaaggtcccgaaggttagtcaaggcggaaatgaaatgagagactggtt  
tcatctggaagagttaggcttggtagacaacagggggaactaaactgattcctctgattagaatctgtaacagcattcgggaggcttggcttg  
aaacaaaactaggtgtcgaaagttgctggcttgaatattttattttggcaagtaataggagcagctgtttcgggatttttagtttgcctt  
tccgtatgtgagtcttcttcttatcactttcaaaaaactctggtagtttaggtatttccagatccgtactttcaggtaaatttgggtgagcagtaac  
atcgatgtactacgcatagctcgttcataaagattttggaaggatccgacaccgtaacgttactaaaattgttctcgtttccgactggtttcgtaa  
gcgcgcataggcaaccgaggtacaggattccttaccgatcggcatgagttcatttctattatgaaggaattttccagagaaggaaagga  
aagagactttcaaggcagagatgtatcagttcccatcacacggaggtagcgttggcccaggctgatcctgaactggtcagcattggttc  
cgacaaagatgaagaaaaagaggattggaatttcccaacgggtggccagatcattggttcattaagaaacgggggagtagactcgtaatct  
ggggaaggagaagaaaaaaatcagagtcaatattatcttctgcaaaatttttaaggggtcatcttgaagaacattggaggagaccttggct  
tcgaagaacgggaatacacgcaatcctagtgtttcgaacttgatgttcaaagaatcaaggggaaccgtagtagttgcaaatattttgaa  
tggcgggttgaatgatgtagagttatgagatggtttcggcagtgaaagatagtttctcagaagaaatagggtcagaagtagaagacattggag

gcacgaagtttttttgcggccgtcgacacaccattttccgacttttattaccatgcaaaaaaggtttcgaggatgaaaatgaacgatggggag  
aattatgttcttgaagaatggaattcttctgaagcaacgaagattgccctgcttcttctgaggactgacaacggaaggctgttgtaaggag  
gattgaaggaagaagatcggaaggaccatgaaatggctttgtcaatacaaggacgagcggaatatcttgaagcgggtggctgatttga  
tggaagcggggaatttcttctgatgctgttcttcaagtcctcgacataaattagtgatgacatttctagatgagcatcgatttgaattttg  
gtgaataaaaaagactcgtctatgacacgggtttgagaatcgataaaatcccatgattgttgatgatgaaaccgcatagttccatctttccat  
actttggatttcttacttctgctggtatgacataaacttggtaatgcaaaacatttgcaacagtgccatagaaccatgaatctttttcttgcggc  
ccacgtaacaagaaaatcacttacttttaattcgttcatgaaactcgaaaaaagcttagtgacaagcgcaaaataccctttttagaactgag  
atatagaaaagctagtacttaaaaaagtaatttttagaggatttcacagatttgctgaactggtagtagtaagactaaaatggctggat  
gtgtctaaagctaaatcttgaatccatttttaagagttctatacaaaattttaattgatttctctattttacgtttcaatttaattcaatcg  
tgtttgtttcattttcgcgattttctcgttttgtttacatgaggtgtgtaatattgatttgggtttctcgtctatacaactttcatagtcaaagcag  
atagagtagcttagagcgtgacggctcatatagttaatgaaaggctgcaaaaccagaaaatgagacagtagcttttcaaccttcatagatc  
acaaaaccttgaatacatattcttctgattatgtacttcttttagatatttctacagaacaatgcaaacatcagtgaaatgttctgtctttcct  
gagtgtttattttctcctcaaagcaaaatttgggagcggtttacttcaagaatcgtgtcatttctgtaaatagcaatcaattataaagctatgac  
agtcagctctccaagtttgccttcttactgttattttcattacatccttcatccatcatctacctcataacgccaactactgtgactacgtgaga  
cgaatcatcgttgaaacggaattttacaaccagttagttataattttggaacgtttatataaacatcttcttcttacaagaagaatttgg  
aaacagtaaaagtgagcattaccattgcatcctggatgacagaagagcttgagaagaagcataggagcttcttactcatttttaag  
gattagaattctaccattcattagtcactgaatcaatgggcccgttattttgaagggaaccgtgacagaatcattgaatctatcaacaagcaa  
aggaaacaaaaggctcgtcttctgcttggctccgaattggaatcacgatgcttattgggtcaaagatgacttggattataaaatgcaacaatgttc  
ttgtgaactaacatgctgcagtggttattggctgtgaagatcattttctgaaatccgatacttataccattcatgggaaatgctctgctggattata  
aacatcctgattgtcaaaatatttagatattggaatgctgtcatgcacaagtcagtagcaccataattgtcgtatcctagcttggatgggaa  
aattatataaattcgcctaaattatggcttgcgatgacggaaacttctgtaactcgtctggttactcctatggttacgtcctctgtttaga  
atactattaccaccttcttggcgttactcagtcacacccaagttcctatcggtagcgtatcctcaatgtaaagataccgtttaggtattg  
agacttgcgaggaactcttactcccagtagctcctatggtgatggcttggacgggttggaatattttgaacgcttctggatccatcatgag  
cttcgaaagctatctacacgttatggactattcaaaattctacacaaaagtcgggtggtattttttgtatagcaaccaaagaggttggatggg  
gtcgtttatactacgaggttgcctatgatccttcaaacggagcactactagctcaaggtagtcagttttgtttgagagatgtagaagttatctca  
gctactgttgacgttgatacggcttcttcaagcagatttcaaccctcacatggattacaaggttactcgtccttctatgagcgcacatcttctgat  
tttagcttagctcattcaaacagaactttgatatgcataacaagcctactgatggacaacctattcgttagtgaccccaggaagagattgcat  
atggcccagcatgttggcttgggatttttggagaagatctcgtcaggtggattcttttgccttaagtggtgggttagattcagcttctagtgctg  
tgattgtccatagcatgtgcagaatcgtaactagtgctatcaaaagataacggtaagcttggaaatgcatcaaatgggttcaacaattttcagatc  
aaacagtttagccgatgtcgtctatagttggatcctaatttctcaacttgcaccaaggagcttctagtcataattttacacaagcttca  
tgggttctgaaaattcctcaagaacaagaggtcgtgctaaaggaacttctcgtatagggcttcatcatggtgatagattgatacaat  
gactcgtgcgattgtaagcttattcgccatggtaacaggaaaaactcctcaattccgttccgggggtggctcctcaggctgagaattggctttaca  
aatattcaagcaagatcaaggatgcttttagcctattgtttgccagttactaccttgggtcgtggttattcaggatctttgcttgtttaggtatt  
ctaactgtgacgagaggtatgaaaaatttttaataatattttttactaacatttttagtttgcgaggatataatgaccaagtagattgttcaagt  
gctgatgtcaacccatcgccggagatcaaaaaccgatttgaatcattcttgaatatacaaggatgattcagatgccaatcctcaagat  
ttcttggatgctactccaactgctgaattagagcccactactgaaaattatgttcaaaagtgatgaagttgatgggaatgactaccagaactta  
gcatgttggaaagactcagaagattgcaaagtgtgtccctcagcatgtttaacgaattgattcataaatggggtgatcaccttctcccactga  
ggtttgaactttgatgtatgttttctactaatggttttttagattgcttcaaaagtgaaacgcttcttttactatggaattaacgctataaagt  
gacaacctcagccttagctaccatgctgaaactcaggggttgatgataatcgttatgatctaagacagttcttatcttcttggacatggcaa  
aacaaggattgatgaagttgctgctaaatgaagaacatgagagaaggaataaagatcagtaaatgaatcaatctatgctgtgattaat  
ttgactttataataaataatccattacttttttttctattaagaatgtaataatctagcggcatttttgaacttgcagctcagtaaatctacatt  
ttgaagtagcctttgaccagcaactactaagtggttcagttgacgaaccttctgtgatgaaaactgaaatctgatattcctttcatgaattgt  
ttgatttcttttaaaatacaaggatgcttctgtaataataccagattccttctattacaattggatgggctatacaagagatgacagcttctg  
cagatttcaacgattgaaaaagaagaatccgataagttatttttgggtatctcgttggcttcttctttcaacacatgacactattgaaat  
gatcctatataatgctcactctaggattatctgagctgaaagggtatacactaaagattaagcattgattatcaacaatagtaaaggtttatta  
tacttgattaaggtgaaagtataattgaaagactcgaataagaccggtttctcctgacgattgggaaatcgagaacaaaatgcaattggt  
agaacaaaatttcttaatagctaccgattataagtagagaaaatttccccattttctacctcagggactgcaattacattccaatgggtgaat  
gctgaaccaactttcatgactgtggacgttgaatccctcatccgaagtctggtatctccaatacttagagagaaagtaagttagagcaattcg

ggagttactttacggtgtgaattgaaaaacgatctttaccgagggatgctatcatcaatcatcctgaactgtgtgtatacattcctcaagtgttgg  
aagtttagtagattctgtctttatagaccactagaagcttcttttctctcttttagtggtccgtgctatccaactccctttcaatggttgggacaat  
tttctgtcgggaagtttagcttcttatagtttgtcaccggcgattttttaaaatctggcctgctgatgttgggacgatgtcatcaaattat  
tttacgccattgaatcaagagataggggaattgttactaattcagttgtttcaggatcaaatcttctgatttaatacaacggaatggaacta  
caaattcctgatttaaatgctgtgactcgggtggaaggcgcacaggttacgtagaaaatgaggaaagtattaccgtggactccagcttttctct  
ttaatgataaaaaacgaattgtccataataaaaaaagaataaacaccaaaccctttccaaggattgatggatagcattctaacttcggcgaatttg  
gatataatgttttggatgattgattaaggggtcaggtaaaactactttactgaagtctttacttcaagttgctgttttctacgggtttcacactg  
aattgtttctgtacggacttaaaactgtcttctgttagcaagttgaaggggtttgggatcaactgatacttagatctttgaaatagatcggacca  
tctgttttggatgatttgatagcttttggtttccgaaaatgaaagtgatgaattgacttttgttcagaaaaggcaagctcaataacttagttgaaa  
ggttatcatatctaaagtctatagaaaacattcaattgttgcgactgttaaggatcttactaaatcctactgattgaaatcacgctttttttca  
acaacgtatctcaatccagcgtgatcatataatggctgtgaagagatgctgaactcttttcaagaactgaatcagattcttcaaaggagtg  
ttgcaaatctgtcaaaaagactgatggttttactgttggattgtcgttagtaacgaagcgtgtatagtaactttgctagattcact  
agagaatttggctgagttaatgaatctataaatactatcctaaaggctatgtccctctaaactcaagaaaaaaaagttgtcaagtagcat  
tgattggaatagatcacgggaatgcgggatgctaaatcggtcttgcattatagaaatcccagtcaaatatcatgctatctataagcaatg  
ctctacggcttctactggagtatttattgtatgggtactcaggctgtggtaaaacacatttggcgtcttctatttcaaatgctttccagtgagtt  
atcagcatcaaaggaccggaatattggacaagatattggaagttccgaacaagcaattagaaatttgttgaaaggcgcaattggccaaac  
cttgcgtattgtttttgacgaattgattcaattgctccacgaagaggccaagatactacaggggttacggatcgagtggtaaatcaacttctact  
caattagatgggtgtaacaatatgaggggtttacgttgttcagcaacaactcggcctgacatgatcgcattgttacgtccgggcccgt  
tgataagttggatattatgcatcttcaagcaaaaaggaaagaaagattttttctaaatcttgacaatatcaggttgcgataagtcggt  
cgtgggtgacctagacaaaacagaggggtattcttatgcagatctatcatctatattcacggaggctcatctgattgctgtacaccaacatt  
gaaaaagaaaattctttccccgaaatgagaaattaaggtctttgacaatttgcacagaggtcacggcagacaagacgaccttagcctcga  
gggacacagagcttactacggcttaaggaagctcgagattagtaaagaaaattttaaatgctttacggaaaacactcgagtgttctggg  
gaggagtacagcatgttgcataatctacaacattacgcacactcaagtttaacaaatcaaaaaagaaagaaatgaaaggaaaatctggata  
aaacacggcaagcataatatcttagctttctactgatggattcttcaaaaaaatgggcctcaccttcttctgctgattcacttgacataccta  
agtcaacgtttggtggaatcgttgaatccataaaatgaaagatgatcagatagagaatgcaattcaaagggatgctctcattaaagaa  
aataaaaagtaagtttttctatgctgggaaattgtctaactgtctaattagaacaaaatcagtttcatattattgaaatattcttaacg  
ctgcaagatatcgtcttcttatgcacaaagacacgttactcatgttattctacgaaaagcaacctatttaacgattagttatgatggacat  
gtcaagtttggcataagacaacggatgggatagaataatgaaagattttccacacacaatgggaaaatcatctactatttaagtaaggat  
gaaagaatccttgctactgtgctgatgataactgtaaaggtattgacattgacagcattgatatggtaaacattattgatttagatttacc  
aatgatttgggtgcttttagtacaccgtctatgaaggaagagatgctggctgttctgacgcaatacaccgttagtgatttcttgattagaag  
gggacggtaacgttctgtatagtgtaaaaaaacattcgttccgggtacatgtattggaatacataaacgcttaaaactgtatgttctgttgataa  
aggtggcatggtggaatactggtgtccagaggaccattcaaaaaccgaatggacagggaaatattgagctaaagagtcaaacggatttgat  
attttaagaaaacaaaagcattccatcatctatccagatcagctcctcgaaaagatttttctcaatttctatccggattggaaggctccgag  
attcgtatgaaagagcgggcaatcttctgtagaattgatgagcatccttaaatgcggcgaaggaaatggagcaggcgttagaaaaggaagat  
gtgaactcttgtatttgaaccaggtggagtttgaagaagattggctatagaaagagacatagagcgtctgggtggatggctgataccatt  
gctatatttgatgaaagtgaaaattatattttatggaagtatcctggagtgaaagattcagtcgatttccgatggatcgtggtacgagtaactg  
gtcgagacgaaagcatccgtttgtgaaagtgtcgtatcaggggtgcgccaagaaaggaaaaatggcgtcttggaaattatggccagcaat  
aatcccttggttgaagaaagcttccgcaaggatccaacttattctgactgcatggaaaaagcagcgttttatttattggatcgtgatgagaa  
tattactttgactgatcgagatacactaaatgagcatacagttggactcacgaaggaaatcaacaaacctgaagaaaggactgctttgttaggga  
aagctgctgactgcacactaccaaggagacatcagcatcaagcttttacctgaagaagcacctaaggctgtcaaaactttaccactcatgca  
gtcaatggatattatgataacacaatctttcatcgtattataaaaaattttatgattcaaggaggggatccattgggtgatggcactggaggagaa  
tctatctggggcaaggattttaggacgagtttcccaaactaaagcatgatcgtcttttaccgtctcaatggcgaattcagggcccaatacaa  
atggctctcaattcttaccactgactgactccctgggtggatgaaagcatacagattttggctgtgcttatgctggattagatgttctc  
gtattgagcaaatgaaacggcaaaatgatcgtccttggagtccaaaaataattaacatttccatctgtataattaatgaaatcaa  
ctagaaaatttggggaatcacgacaaaagtgtttattttagaccagtttctgtccgtatgattcattatcataaagtaataatttttggat  
tttttaataataaatacacttttcaatataagaattccactcctttatgcaaaacttaggtgtatagtttccgtaaaaccttagctaccgaa  
aacgctgtactttcaggaaggcaactctctacactcaccctccatagaaaagttttagttttaccattcttgagtcttattcttctgatgataat  
gctacattgtaattgttaacattgtatataaaggctcagtcataacgtttatttaccattgttacctcctgttattatgtatcgaataattg

tatactaaagttgcacgggatggtatccccgtttactattatggtgatgaaagtggaatacaactgttcattgcccaaactggtggcagtttgagttgg  
gctcaaaagtagctgaatgcaactatttactggttaatatcctatacctggtgactaagtagacatcgtcttcagtaaaaaagtcattggtcagcgc  
gtcgaatctccaatccgaagatcctgactgtagactgatgagtatatgtagctttgctaatcaaatcaatcagtaaaccttgcaattggtaacgc  
atcgcatcagtgcttccgtttaaattggttacttctgtattatgtagcagctccttgagcttatgaatataactaatattccattttacaatttatt  
gtataataatgaatgcaacgaggtatccaattatgacaattgtgacagatactgacattttgacatcacctgcttctttcgaaattcaagcaaa  
tgaattaactgaactgcaattggcatacaaaaacttctaccaacacactctttttatgaaacatctttaagaggcattgttagtttctgtgcatgcc  
cttttttctgtgtttttattttacaagtttcaaaaagctgtgattttgttacaattgtggtaattgtgcatagctaatcttcaatttcaagattaa  
atcatgaagaataattacgctcctattactgaaaaagatgaagcacataattctatgattgacgatgtgtcagcagacgcttttttctgtgagaac  
agcatatcgccgagttgcccctcatattcaagtaagtgttattgtaatagctgcgataaagttgttactaagctaatggatgattgttgaca  
aactaattcttctgtctgcaaatgtaaacatcaaatgggacacatggtacccctctcggaccatacattgatgtctatttaagaacattttct  
aattaatgtagattcgacgaatctattgattggaaatggcagaacctgcagttgaaaaccttctccatcgcatcaccggtaccatcatcga  
ttgaaaaaaaaactttttattatctttttatagccatccatgtttatattttgtttattctcaaggattaatgaagaatcggatagtttctgga  
ctgtaattaattttgggttatacttttcttaggtagtatacagtaaggattgatattgtttacaattgactgacaaatgttttagcgcatacga  
atcttggacgggaaggctgtgtagcactgctcatggaatcaagattggttctgtgcaatgcaaaaaccttcaaaaaatggttcaagccatgctt  
ctggcctttgcaaaaatagccattctcgatattttatttaagtgcagcttttccgtggtaaagacgacagaaaatattgaggggtgtgatccaaa  
gttttttggactcttccgctcacacaactcgagtacttcttaattgaaacaagtaagggtgactactaaaatcagttgactaacttttagttta  
tccaaattacttcagaatttaacgcttaacgtaataaaatcactgattggtacgtaactattgatgaattatgtttatgaaaccgttctgtttatt  
aactgagccagaactacaggaaggagagaattattggcgtccaagaagagaggcttatgaaatgaatgagcaacctgatgaagctttaccact  
ttctctgttatagatgaataattctaattgtaataatttttaggtttgagacggctctgtgcagccgaacctttctgaaaagagaccaagcatt  
atagtaaaagttaatataggatgcaatctacattgcttgttaacgctttatgaaattagggtcgtgcaatgaattctgctttacttttttggattat  
gaaactctacattgttgcctgtcatcaatattactgactcttgcgtaaggtaattcttatctgatccgatcactgctttttgaccgttctact  
ttatgtaataaagtgatgaaatagcagaattccacatgaagacaagtagcgaattaactaattcccctttttatagaagatcggatagttc  
ggctccttgataattagagtaaggattgatcagacaagtgaagtgaagaaacttttccctaataagtcttcttcaatggctttcacaaagtac  
aacacagtcatttaacgtacacaacctacaattgtaattacttccactcaataaatattctataaacctgagacttattaacgtaaaaat  
atgctcttatgaaagtgtatggaatattttatcacaccagcaagacacctatcgtgacatgacatatgtattatgttaattccacctgtgtggcca  
tgtaactactggtagaagtggagcgacactggatagaggtaacacctgttgaaagcaagttactttacaatggatataatattttta  
aaaaggaataaatgactggattataatataagcctcgttcttattgctgtttttaaaggatcaaagggcagttctaactcatcagaac  
aaatcacaaaaaactaacatttctcgatcaacgacatgctgtagttatggatgttagccttataaacttctacagattccgagctccgtcct  
ggttacggcaaacataggcaggccagtaaatctgaaagcaaacctttacaagatcactgtgctccgagacacacaattaaccaatcatgtaag  
aaatagagctaaaactttatgttgaaggaagggtgtatacaaaaagtgatgcaattctgatcccgcaacattggcactaattgat  
ttttctttcatcggttatgtgaaacaggtgatgcgatttcttctctatagtaggaacgagctataggaatgtaccacaccttcccttctgccc  
tctgggaattgtggaatcttcccctgcttcttacttctttagtttcttcttgatgattcaacctactccttctatattattttttttgtttt  
tttaacaaagtttaggtatcatcgggtgatgggtctcgtcctcgttaaattagtagaaaagatttggattcaaaaggaactaaaggataagctt  
ggcttctatggcgttctctgtgtgatgacggaaaaagttactcggacgaaggataatatccctgatttcttcaaaaggaacatcgggaatc  
tgaacgtaacagttcactgaattggcattcaaaagacgacaacgattaactgcagactctgacggaattgtcaatgcaaatatgctttgg  
atcctcatataactaacggaattatgtttctgattgtgttgaaaaagcaacctcagagacctatacggatattatcggttctttttactggg  
agaactttttataggaaacggaggtgaagcctggaagggtttaccaaacctcggcctactcaaggctgatgaggtcaacgttgaca  
tatctttagtgcaatttggagagatggttcttttcttctgttattagaatacaaaattctaaagatgttcgaaattgactcgcgtcattca  
catttatcacgaaaattcgttctgtaaggtacctgtaagcatcgaaataatcaggaaggcaattgtcaaaaaagtatattctatccaagg  
atcttctcaagagtgcttctcctcaacttttgcgtaaaaaggatgacaatcagaaccatttctgtttacaggtacttccatgagcatcaca  
atgttcggttacaatatctgacctgcttctgttctgctgaagaatggtgcaatgctccaatcgaattatgctatgtagaaaaaggtcaacggt  
tactgcaaaataatgcagacaaaactgcaaaaatgatacgttctcgtgcacaacgtccactcgaacgcgtacagcagactgagggtatcgtt  
gtcaatcggtatgggataaggatccttattggcagagtatggcatgaaaattgcttctccatgatggacgtttcaggtcgtatctgaaccccc  
ttcatctgttattggggtaattcaattgaacgacctacaggtggtagctggaattacgtggttaaacgtttcttctcagcctgctcgtacaccgta  
agtcttggcagctcatgttttctcactcgactcgaaaattactactgtagtaattgaaaatttttaataacttatgtcaaaccttgactgggctg  
ggtattcagttctcaaaagaagccaccgattatgtatgccagctacaggcaaacattgaagactcctgaaaaataattatcgaaaggctga  
gcaagtcagcaagtgccctcctgattattttttatcgttgataaaaacgtccggaacctatgggtctataacgcgcatctgtaacactatgt  
tgggtatacatctcagtcgcttgagtcagcacatccagcaggcaaaagccgcaatattgtgcaatcttggaaatgaagttaatgttaaacctg

gaggagtgaacacgattctacaggcaaaatcgaatccgcttggaatattccaacctgatcatcgggtcggatgtctatcatcctggcgttggat  
catcaggagatctatcgcttcttagttggatctctaaacctgaagggagtaagtatacagcaatttcacgttctattcctcgacatcaagaagtc  
attgatgatgaaagatgtttagtccatctctgcaagggttaaagctacgacaggtaaaataccgcaacggatcatttatttctgtaggta  
cctccgagggcagtttaagttgtttagcaagagcttgcgaactaaagcagcttgcataaagcttgcggaagtagatccaaaggtta  
ctgttgcactactcaaaagacacccatgctcgtttttataaaaaataagcaggatggtgatataaatggaatctcttccggggacaatta  
ttgagaagaatgttacgcatccttgcgaatgatttttataaatttcacatccaacgcttcaggcgcttctgccccgttcattacaggttcca  
tgacgaaatcaacatgccacctgatcaattccaagcgtgtgtataattgtgtatgtgatgtaggtccacaacttctgtccttggctctcc  
ggtgactatgccatctggaagtaatttggctaagtaaccaagattcgacgtatgatgatacggctagtgttgcagaagaaattgctggtgaa  
gctgtaaacccattacttgaggttctggcaagctgaaaacgaagatgtggttatgtaattctatataatttctggtctctcacaactattataca  
atttattgaaactagtaagaataggtggtattggaaccccttgtttgacctagcatagtgatccaatataactattcaaatcaaaga  
tgagctaccggtaacctcttgagcagaatctttatacggttgggttgattcaggtaccttactgaatactacattacagttcgaatctgaataat  
cgagacatagattgatgatcattggcaaagtattacagaatcaagggacagccaatgttgaaaagcaatcgatacttgatattgattacatt  
catagcacaacattaatataataaaaaaagaaaaagaaagaggtaaaaagaaaatgaaaaagaaaaaaataatgttgcaatttc  
atcatattctatttttaaccaagaatttaaaacttcgaaaatgctgagaaaatcagcttgagaatgttactgattcagtaaccaaaactttc  
attaagtagcaagtaaaactaggtattataaattgactgattcaatacctaaaagcgaagtaaatccgattatgaattgtaagataaaatt  
ccctcagtgcaaatcatatttcacgaataagatctaatacaacgcttttgaagcaggttcttttttactgactaaaattttatataa  
aagttgaaactttgacgcgtaaaattgcatcagcagtttaacagatatttttatgtttcaaacccattaccgatcacgtccaattcgttcatgat  
ggcggagttacaaaatacaaaaggcggcatccctcgtctacatcattccattccatcttagcagtcattccgtgattcattcgtccaacgat  
cagagattcagcagagaaaagattgcaactagtagcttagtaaatgtaaaaaaccgaaatcagtcgctttattcaacatacgttttaaccat  
ttcacagcaacgctccggcgtatgtagcattatctgccccaaaagggagttctgactgttcaaatcactcagcacttgagcataaccaagagc  
attatttgcggcttgcataaaaaataaatagatactagccttctgtataatgtagtaaaaaagcagcgtcaataatataatgtagtatta  
ccttatatgcatcagatacacgagaagctgctcgtcttacagccaaatagaggtttcttgcattgggcaatcgctgttctgttcacaaagc  
ataataaaataacgagagcctaaatggttaataaatatgatcgaaccaatcaactttacatacagatgtgaaattccattctgcaagaatcaca  
cgagggttaatcatagatccgcttcgcttctgcttctatattcactgctctcgaaaaatttagcggaggggagtgaggagcacgaggcttag  
gttttcttctgggaggagtgctgaataaggctcagcgttactgagtaaatgagggtatccgataaggaacatcgaacagaaacgatgg  
gcataagggtcaataaggctaggagaatgagaagcacgaacatcactagccatcaagggatctactagtggtaccagcaaatcatcagca  
ccaagctgagaggaagcttgcaccatacggaggatagccaacaggatacatgggagctgataatggaggacgatcgccagccattgcatat  
ggtgattttagtagggatcatcctcagtaaaacaggaccatattgggtcaacgattctccttggggaggactcaatgttctcgttgaagga  
ggttgcaattcaaacgagcgcgatcataatacggcgaggtgcatcagattgggctggatagatttggattgacgcgtagctgactcgggagg  
atatggtgggaaaacaggagactcaggaggaacagcagaagggcgtccatacattaacgattcagcagcaacagagcgaagtaaggccact  
cataagaatggccataatcagtaaatggcgagtaaaatcatatttctgctcgttaagcgtggatcatcaatcataatcttcttccaatggg  
ggcctcacgagaatcgggagccggtcttttaaggagaagtaaaactattcagtaggattgaaagtacatggacgggtccgctggtctgc  
ttgaccagacactttagagtcatttagattcgtttgacggttgagaagctaaacaaaattagtcattgttcaagcaagcaaacgcatattc  
aatcacattgctttagacttcaacaagcgaagttcttccattatgtaataataacttacgccaataagcttcgaaaacctccaagttggga  
gttcaggttaattgttagaagactgagaataaagttgtgttgacattctcaagaatctgacaatgtaatttcaagcttcaaatgaatgga  
agtttgattaattattccaatctctgcaatcttgaattagaaaacaggttcaaaattgaattctgcaagcgttaattctgcaagcgaatac  
caaaaataaaactggacacaagtttaaatgatcaaaaagtaacctcaatttagtttcttttattacaagaatcctgtaactttttttacgcca  
aaaccaaatatgaaacaaaacgtctcaaaaaataatataatacaagaggaaagcagccactttagccaagttgccaatggaaaa  
ttaaagttgaatagctgattaattgttaattagttatagtaagaagaagcacttgcaactccacgacttctgctgaggaagagagtaggtt  
ggaaaggggagaatgggacatatcaatcaaaaacatgtgtatgcatctatcgctaacggagccaaatatacatatatactctaaagaaaa  
attatcagcacatgagatctattttattggagtttgtgtaaaactactataaacctatatgaagccaaatgctcgtctattaatgatcaaaat  
gttactcaaagatgtttagtactctgagaaggatttctcattcaaggattctgatagccaataaatggtagaatctactatttcaaa  
cttgaatgctttagaagaccggttacgtttcagtaaagcagcgtttagttcagatttactatttgaagtcattcggcataaacaagttgt  
acataaactataaacaggaaaagcaaaagctattaaatagcttttttaattacttatattgacaataatacacgtattgagagttgtaag  
ataaacaacaaagatttctcattcaaatcgtcatctgtaggtaagtagtagctttcaaatatttggtagtgaactccatagcttattcacaat  
gaaaggtcatgattcggtaacaggtgaccttggcgacagctcggaagaatgctccattcagtcgctctcagagatggttaggtgacgtgg  
cggcgtcaatgttgtgtaagctcccaaacgggatcaagaagtagacgatttaaaggagattgatcattatctccgaatatattctgggaat  
attgcaagagattcgtcttactacacctggatgaagctgacggcgtagatgcatatttctcagacgatgggcaagcgttgtgcatggagga

tattggcatatttcgattgtccataccgtgtttgttctctccaaaacataaggaaggtaatgtctggaagtagattccactgtatggagccgta  
aaataggacaaaactagagacattgacaatgcgtacatcaccaggcttgaattctctgcgccacggcgtaatgcaggaataaggcgtacgtaa  
acaagtaatgggatagataattgtctgaattgagcttcatagccattctttgacagctgatattgccaacatgacaccagcattattgattaa  
aaggccaacttcgtttcctttgcccaggaatacttctgtagcttgatagacactgtcgaatcgagtagatccatattgaagaacacaacgttggcg  
ttttgcatcttcgcgtatattcttgatcgtgtaattgtttttcttcttctgacccggtaagtacaccttcgacctttaattgccaattgcaaacg  
agtgatatacctataaccaccagaagatcctgttacgatcgtactttgcccgtgtaaatcaggaatgtcttgaaacgaccaatcggggattttaca  
ccgaaaaactttgctgaacgatcaattaaattatgaaacatacttcttgaggctagattgtcaaaaaggatatatgaaagacgacttttagtt  
gacgcagcatataatagtgtgcttgaaggctactcaatacatattaagaggtaataataaaaaaaaaggtagaccagtaggaaaatg  
ctgcttttttaagaggttttttacactatgaatcgccttctcaaaatctgttattgacttttaaatcttactcgtcatgatgattctcataaatgc  
acctacagagagaagattttcccttcaaattgcttcaatagcactagtttatatctccctacaaatcgtgtctggtaggagctatttgggttat  
gcttggcttactttcgttcttctcatctacgaatagcttttctgttagcgaataaagcatctagagcaaatcatttcaaatagaatttcttcttct  
tttatttctcagactttagacaatgtcctgtttgtttacatataaattctgccttcttctgctggagaacaatgttacctgctttttcaactttcaacac  
aaactgagacctatagaaccaactgtttggctgtcctcgttgaacagaagattcatacatgctttcttttataaactctttatgacagggt  
tctttttttactagcgaatgttgagtaaatcgaacaaatggatatagacgagtttaacgaacggatactgaatcaaatctagaaaaggatttt  
ataaaagtatatgaaaagaaggaaaacaagactagctggatcaaacatagaactgggtgcttatttctttgtacgcaagcaacgtagacca  
gttataaaagacataaataataataaattgttttttaaatgcaatttacttttcttctgagaatctatttctttctatatttcaacaacatc  
taggcattggaaccagactcacagcatatgaagaactattggctgcgtttactagggtctgatgataacgatttatgtttcagccttggattc  
aagatcctagtttatggaagcgtgggctctgagagataatgttctactcaagaatgcgctgtaaaagtctttatgcttttttagataaatcggg  
aggaagggtgctccagttcaaaaatattgttacccttacttctgaaaaatgttcttctcagcaaaccttctattagagaccttactcatca  
ggcacttctacttttggctagcgtggcgtatagataaccgttgtgatggccttctgagtagttgtcaagtgaaacacccaaaacaagccatggcc  
tctataaagaactatgtctatttattgagaatacggatatacctaccattcttcttcttcttatacaagcttcttctggtttattcgtcaatcaga  
taaaaatgtgctcaagaagctccaagcttccggtcaggtttaccgctgggtcggcgattcacttaaaccaactgtttcccagctaaaacc  
aattcaaatatctgacctgagctctcttcttctcagcactcctttagttacgaaaagctcggatcggctatcaattgttaccctgtttccccgtt  
gcaaaatctcgtttcaattgaaaatcgtcgtggaacagaaacatcttccagcaatgttagccaaaaacagaccaacacctcggcaattc  
ccgtccaatgaaatcatccttgagcattctcatcctcaatcttcttcttctataaagtcacacttttgacgttccgattgacgttcttctta  
aattaactccagaactctataatgccttcttctcgaagtggaaggaccgcaagaagcttctgatagcattcacgaagtagtaaataccct  
gctatgaagaaggagattacgatgaactattcgtgtaattgctaaatcattgaaagacgccaacgtggtgtcgttggtagcttctgagcagttgtt  
gatagctgtctcaaaggcgtgaaagaaaatgaagttccttatgtacctattgtattataaccattattcgaaaggtttaaagagaggaaacctcc  
ttggtaaatgttcttttgacgagcaaatgtctatgtttgaagcttgggtctaaatgagcttgttgatcaagccttagaatttttaggacacaaaa  
ccctcaagttaaagacagaacactgcgttggctaaaccattgttctcaacatacagagctatgccctccgagggttcttctggaagcattatgta  
cgtgttttagttctagttatgatacgtttgaacctgttgaacggcaacaacggaggttagctactctatgcaaatgtttggtcaaaacatctt  
atccaagtattgtcggacttgatccaagaggttgcaagaaggttaaatgagcttccagaaaacattcaggtacaagcacatccaatcaacccc  
ctagacaaaacttccagagtagcttctcctttgaagccatctcctgtcaaaccaattttatctcctagctttacgtcttccctttggcttctgta  
gacaagtgtacctgaagaacctccttcttcttaagctcctccctgtcaaatcactatcttccagctcgcgctcgaagctatgaatcatagaatgacc  
aactcggcttgaaccagccctaagtcggcgtctattgggttaccagcagacaaacgaagtttgaccccgacattgactaaaaaggtaga  
aacgaaccgcttgcacgaagactcaccaagctacttataagttccacattaaagagcatgtcttccagcaagtaaacagccggtgtaa  
gtaccttaatttggtagcattacgttgcgaaaagattgagttggatctttaaagagaagagaagctatccgacaagtagcagcagagagag  
gatgcttggaaagagaacggttattccgggaaattaatgatctcaaatataaacgcagaattacgagaacagcttgataactccaagggat  
gatcagtcagaaagagtcgaaacttttcttctgcaagaagaggtgaaccgactaagtaaatcgattacaggaggtcttgttggagtagagcagc  
gacaagacaatgtggatgaaaattccatggacattgattccaaggaaatggaaagtacagtaaaaaagaagacgggacggattcttcatata  
ctatgaaaagtccaattagaaaccagaagaacctttaagaaatattcggcgatcaaacactgcttccagcagcaggtcttctgaggatcaatg  
ctaaaaaacggcagcttttccagccatcttttttccaatagcaatcaatcaatggcttcttctcattccccctgcaacagtttctcc  
gtggtagagggggacagatattccacgacttgttggacaaattcaaggatgaagcgaagctaaatcaaaaaatttttaaaagattcaa  
aatgctgatttttgaaccttcttctgattgttctgtatataactcttcatgaagaattcaatgactgtccggagaaggactatggatatcc  
ctgccgagtttctaacgaacctgcagacaagaaaatgctgaatggtaatagggttttcttctatgctggttaaataccaaattttcttaccaggag  
gattcgcaggaaaaaatgccattcctttattgattctatggggttttgtttacaactgaaacgaaggtagatggaagggtagtgactatttactttt  
tttaacaaaatgattgatataatgggtgcatacagatataagaacatgattaaagcttagattggattgattttgtatttaattcttcttattgc  
gggcagtagcgaagatattgattcgtttccctataaaaaaccctccccgggggaaattgcaagcttagcactaacgagcttcttttagtctc

ctaatatggtaggagagtaattgggttttaaatgaatatcaccttagaacgaacactttgtcgaactatgatatcaactttatggaaagcgaagg  
ggttcatgcaacacaataagtgcccaaaaaaataaacaatcacctaaaggagcagtaaaaatcatttgattgaaacatttcgatgactgtgtaa  
agagaacaatagatgcataaggaatggacaaaacgaatcaccagtcacaatcaactatagtgagaaatcggttcactttcgctattttccaaa  
atcttttaactcttatattcttcgattaaactgtttctttaaatccccttacctactacctgttaactacgatcatattatccttactactgtctg  
ctgcatgcatatggagaagattctcagttatagcatatccctagtatatagctatacttataattatctcagaaatccaaaattgtgggaaagca  
gctcggagtttatatttctacatacgacatgacgttatattgacctcatgcaaatgatagaatggacgaacgagttgtaagttgttgcactttaa  
agcaccatcgatgatcattttcccatcaacgaaaattatataaaccgacgacctttatcgtctcggactttacaacaacatttgtgaacatca  
aacactatctttacggatcgtttctagaaactatcaatcattgaaattccgaatacgtttacatcgatctttgttattgttgaaactacaacgta  
ttgataccctttcttttctgtataccagttataccagtaattattatctgatattttgggattgtaaagatgcaccggttctactctttaaagaaa  
tagtcgtgccctacggcttcccagttgatgaatcctcctccactgtcttagtgcggtaatagtcgatctttactcattcagacattccatgcg  
aattaccaagctgttaacttctcccgtgattggctaagcgttagccgttctggcaaaaatggagaagaacgcatggctagcatggccaagtc  
actcgtggctgctgacgctgctcgcagttgtcttactgggggaagattgtgacgatgacattagtgatgtaccgataagttgggagtggtgtt  
ttatgaagttcggagttggaaaactatttgattgatcgtcacgaccaatctcgtgttacctaagtcattcgtaacatcgaggcctctgtccaa  
ccttctcgtgaaaagaagcagaagctttggatcacattcatgcttaagcataaggatcctgaatcacctaaattggttacaatggagcaagag  
ctgttctgtaggaagccgctgtttgtagctgaagctcaactttcaaacaccaccgtgaaaagttcaagcaagcattgacactacaattggat  
gctctccatgagcatcccgaagctggcttgattactgcctatggacgctattgttgaaactgatcgatgacgctcccgttactccagggtgaag  
ctcgtcctgcttatgatggctatgagacttctgcgcaaatatcatggatgctgagcatgctcttagcacctggatcccggctcatcctcagtaaac  
tttgcaagcctcaagaagaagattcagagtgacgctcgttcttggaatgactatgaggccaaggtgagcctgttctgttcaacaatgact  
caaatgaatgattctcaatccgataccagcgaatggctgagaatgacctaatatgatcctcacggtcgtgagaacgcattgctcgtatggat  
ggtgttgaacaacgcgtgcaatgataccacaagcttacaacccaaggaacaacactgctgtaacagttgcttaacaacaacaatggaaga  
aaagtttgaacaagaagccacatggtaatttttgaaacactacgcgttgggtcattgttgttttttttttttttggatccaatgtaaactgct  
taaaataattttcgtaatggcagggaaaagaattcctaataagggtgtaattattaatcaagcatacaaacgatacaattattttaccg  
atggaataatctaagaagttgattgagcaagcaagtaataacttaagactagtgcttatttttttttttaagagcgtttgtgcgtttcaa  
ggaaggttagtcgctagatggaatatttagtttagtttctcaatccatgaatgttttgaacatgtaggagtagctgattttgaaaatttaattac  
ccttgaagattttacaatgagaagtagaatgatagtggtttatattatgtttgggataaagatagtgaaatagtgctgtaccgtctattgatgat  
aagtgctgataagtagagaagaggtatgtaggaattacaagactcgtacatgacgactaatacaatttctatggcaaaagtagagtgata  
aaagagaaaagtgagtgatggaatggaagtgaactccgaattatggttgaagatggtcatccgtaaaagaatgaataaaaatgaaacaga  
gttagcagaggtacgcaagaaaattttaaaaagaacaagttcatggtcgtacgaaacttatggcaaataggagaacctaaggatcaggaga  
tgattacggctagcaacaaaatcttaacaaaatattttggattttacatatattgctacaaccattcctgcggcattgtgtttttacagtaac  
ttttacatacacctatgtaactatgacggagagctttatgacggaatgaatacagagaactattaagaaaattgaggataacgctggccatt  
ccaaaagttggttaggctcgaatcaggccatcgtaccatcgcgttacatataataaggagctcgatgattgtagacagatatacggagaaccc  
tacgctcgtgagagaagaaggtggaactacctcagccaacatcctcagctcctttcaaaaacaacggaaattggaaggacaagggcgg  
aataaccgtaataatgaaatgaaaggtcaatcggctcagaccctgggcacacgcaaattgcttgggtgaatcatgaaggacgacctacaga  
agtcgatgggcccgtttgggttggtagaattctagtagcagtgctgactttgatggaatcacaccgatggtagcctcctaagtcggattctatc  
tattttcgtggtcgtcaagaaagttcagatccaagctgaaggtcgttcaagaaagaatacaacggcaatcaagtcattttgacacacatt  
gatcatatgattttacatttccgaaagatggttagtaattgattttatataatggtggccatttagctgctattgactgtggaatgagaaga  
ccagtagtcagttagatggtacaccattggttttagcttttttagataacggaacgcttactaaccatttggtagaggcgtttccgtcggcatg  
cgtatagccaagtacattgacccggctgtttattatgacaagttgcaaaatcacctatattatgtcctcgtatgtattaatctattaacaggaaag  
ttggaagaacaaaaacaaaaattttaagaataaggaaagcgttctattgcaaatatgctgacctgtcttttctcttttctgttcttttttt  
ttgaaatcacatggctgaaatgataactaacttttagattcgttgcatgcttaacacgctatcgttggcccgcgccagcgtttggatgacg  
cggctatcttagtggaaagctgacctcaggaatcagatacagactcttaccagatatgagtgagtcctggatgatgatctccagcctagca  
tatctacgccaacaatctccggtcggttaaacaagttccacgagaaccctcctccccataaagatcaccgctacgcaatcacctctctc  
ataccaacgttctctgggacagatcacgataatgaaatagtagatcctcgtattctggaaatactacggctgacctaatagaaaccgcatcg  
ctattggagctttcgggatttaacgataatcagggtttcacatctcaattcggttctcacacaccggaaccagtagcatcacgaaataaca  
gcgagttgaaactgatccatctctgggtgattccattggtcactattcgtgtatctggtgaaagatgcagataacgatgatgaactattc  
tgatcggccgatccaatcgcacaaaagatttagcctcatgtccagcagttgggtctgttgataaaccgagtttagatggggatggttatgt  
taatgagtctatgataacaattctttgacgacgaaaacgaaggacttacagcgtatttcacagctctcgaatgagccgataaaaaac  
actatagaaaatcaaaaacaaggatccctttcatcggattacgatccaaatcatatcggaaagatttctacgcaaaaatatttaaaccg

atgtctctcgttcgaaaaaggacttaaaagtcttaatcccgaatcttctccaaacagaagcacaacgtacttctacgtctagtatgtctccc  
cgctgtttctaaaaatgaaaagaagatgtctgcacctcgtctcattggataaattaattcgtataggctcgttacatcgacatcacccatca  
ccaccacaatcagggctctggatccaaaccggatcaagtgatccgactctggcttggattatataagagtgaaagcaagcatcacctgaatt  
attattgcaagaaatctatgtctaccgatcgccttcttctccagctacttgaagctcccggatgactccctatctaacccaaagtaagtg  
tgagaccggcttttaccctttacgcgaggatactcgcagggtgaaagcaacggataactccaatccggatcataaggaagagcctgat  
aagcccgggaaaaatagggaacccatctcttgatatttctcataaccgtcaaatgatgatagtaacaaaaaccggtaagttgacaa  
ccacttaacagtaccaacaaaattggcaagcccagctcttctcgaacgcagctagtcaatcaaagatcccaaaccttggtacacattcctc  
tgagtcaactctctgatcctcagcttggcttttagatttgcaatccgaaagtcgatccaattgaagataattctttcatttttggtgagcaca  
atctgttaaagatagaaggaagtattttcaagctctacggatactagagctgatttctattacgataaggatgttgatattgcatgagtttctc  
accgcatatggatttcaacagattcaattgaaattggaccaattaagctaaatgttatagacatctgaattcggatggccatcaactattcga  
tacetgatcgcgaaacggaggacgaacatgcaattatgtctgttggaatttgattgggtgaggaagcagatgaggctgtttattggaacaa  
gctaataacgtgaacggagaaaacattagcaaatggcaagtggtcaagtttaattggctaaaacttatggatgttattattataatgattttcttct  
ataactaattatgtggacaaacgcagctattcctcgtcacaacaataatagcctttcgtttcatatgaatgctcgtctctcctcctaata  
gctagtgtttttggactcatgatagtcgataaatcaatcaattaaggtttgccattctatctgtcatggaatatattcgacagtggttaggt  
tccttatataattcacctactgaagctttaaagttatattctcagttcgtcagcttataatctataacagctacgtttcggtcagacgactgta  
agctcgcattttctattcagatatactccataaattcaataattggacgcagacgctttataatttattgttttgcctcgtactcaatgcaagat  
cggtttattccacgtaagatgaagcaattatatttggaaactgaaaattatactgactagaattgttaagtccaatctgacaactggcgatt  
atataaaaacttaagattaagaaaattttgtttcttttattccaatgatcctaatttaataaatttttacacatcatacaagctgaatatcag  
gtcataaaaaatgcaatttttaactgacttgaatagtaataaattgattctaaactctagaacaaaaaacaattaaaaccgtcagctataaaa  
taataataccgtatcccacattaatttgaagccctaagcttaagatgttgtagtagcccagaaaagcaagattaaactaagtaaatccc  
ttatatttccctgttccaaaaaataatttagaaaagtcaaaaatgagcatcaaatgtattaacaagcattagtaaacattaagcttgattac  
ccattagtttgctttttggtagtgacacttgcaattggaagaagcagaatcatcaatctcctcaggggcatcaccattacactgggtgctgctgag  
tttgcaacagaagaagaggtaggagcaatactcggggctgttactagtgaagaacgctcattatcagagctatcgaagcactattatgggaat  
atgagttgatcgaactattaaactccattgacaacagtggtatgatgtaccatctctggcgaagcagacggcaccgattcggtaggatgat  
caacagcactgtagagctcctgttatctgagtgagcagcattgtccgatggaacggcagctgaagattcatacactagtagtgtaggttta  
aaactggatggggatgaaaaaccgtaagaggtgttcggcaggctcaagcactcagccgtcggcgattgttctgaggggcatgtttcgtttg  
aggagctcaacagtttcagataatccctcaaaagagctgatcggagcatccacattgtctcagacctggaactggagtagggaagtattga  
cagaagatgtaggaggagcgggctcggcagtgacgttctgaattagacatactctggtagtagcggaaaggcaccaccagcaacatttctt  
tgtgattccaaatctttatcacttgcaattgtctgttatttttccatatactgataatgaccatacatgtacatgtgcaaaaacgcaatccatggc  
gtaatacaaaaaccaagacaccgcaaaaacaagcttaaccactggggagcaggatagttattataatagtagtcattgcaaaagtggtttcc  
tgagcacaatagataccgatggaagcaggccaaagtaaaaaccagaggatagaccagaacaaaccgtaaggcggtaaaaactaac  
cattccatccagcggaaagacaataaaataaagtataattggtttgctcgttaggatttctgcataaaagtgttttcggccaccaacaaaat  
aaacaggcgtacaagacctgagcgaatcagcctgcaccaatgcagattcaatccagtaagtgacgatggcttgggcaaaagttggtgactgc  
taaatcaccggaagtggtcaggaagacgcaaaaggcggactctgtcctccgtattttatacataccataagcaatagcgaattctagacctc  
agatatgatgaaggaaccaacagaacagacataagataagatgctggtgcatatgaatgttttgcggttaaaaaagattcggatcagaa  
cttagatcctcgtcatacgcattttttccaaagcgtgccgttttaaatcaaaatcatcagcgtttttacacttgatgttcttgatctttatagaaa  
aaatccttccaaaagctaacaaaagaagaaggaccatttagcaataaatcagattggttagatttaatatcctgaacactttgaagaaa  
aataaagggaagagtcgataaatacgaatacgtttttacaaaagcaagacaatagactaggattaagtgaacagctgaagctgctaaat  
atcgaagagcgtcctctgtcaaaaatcaatgagaaccacttaaaataggtcaaaaaatagaccaataatagaaaaataataggaatat  
ccaacgagagtttaaaaacaaaaaacgattgtaactcgtcgaacgaagcctgaatgaatgacaatcagatggtaacgagggaaataaagc  
gcaggaacgctaaaaaaaataataggtatagcaataaaaaagagatagaaaaaaaatcacaacggatgaagataaaaaaggaa  
aagcaacagctatgaaaaattagggcgggttcgcttctgttctcagtgattgaaacttgaacgtaagaaaccgaagtggttagaaatagctt  
aaattgcagactgtttgaaagcagctacaatgggaataaatgaaagctcggcaaacagcttgattcagtaaacacactgtgcttgatacaca  
agtaaaacacaagaaggtaaaagtagaataaaacagcaaaactatcagatttgcagctttattttacgatatagggtccgtttctgagtagatc  
ttaccccgaaaaaaaattccttgggggaactgacctgccgaaagcgataagaatagtcacaaatccgtaaacggattttttagtcaaaaa  
tcaggaaaatcaactatttctgtgaattttttggtgatgtaggagacggaagaacgtattttacgataggtttgatgtttaccttcgatgtaag  
caaccgtccatgacctatcggtaggtcacttgcaactacaacgatgctcgtgaagtcataatcgtgctttactgtagttttctactttataat  
gtgtgcatatggctattaaaactgtaatttctatgaaagtacacaatgtagaaacaaaatcatgaaaacatcttagatcttcgaccaatag



agcctcaaaggttttaggatacagaaagtatttgtaaataaacaatgtatgtttactactgcaaataatgacatgttctgctatgtattttaaaa  
taatttcgctatacaattgtgtactgtgtcatagctcgaatgattatgtgtaatatgatgactacaaataaatgtaaggggaaaacatccttcattc  
acgctcgaatacagtaacaacaaggaagaatatttctttcatgaagtagtagtaaagtagcaccaaagaaagtattttgatggttccaa  
ttcgaatcagttgcatatgattcaaaactcgggtcaatgcttgagagaagttccgactatgacttacaatagttacataattatacggatacaaagta  
tttttttctctatgcttttccgagtcagctaaataaaaaacatttccaaaattcaattcatactattacatacattacataataataataggcaac  
acagaagcttaatacaaaactcattacgtgaatctttatctcaggaaaacataaaggttcttcaggaccgtttcaagtactttaaacaccaag  
agatgcttcattcactgcttattctgtttcatagaagaatcttcatcgataagctcccagtgagaccatcaagccttggaaaaaatctaccaacc  
tttctgactgtacaagagtaaaagcgatacttcttgaagagatagttccgtagccttctgagccttgaaacacggcgataagaccaaggg  
gccagaattgtccagtaatacgaatctttgaggcaatagcccaaacagatagaaaacgaccaataaattgttcagctaaaaaattagggt  
gtctcgaccattgaaaagaccattgtattaaaccttttgcgagtgcttaaatcaaaattcaggtgtgggggaagctccttattctttctgtat  
agatctcgtgcttgtagaaatcccactgttctgctgatcagcaaggattcaactgcaaacgtaaacataaacaattctaaagccatgcaatctaat  
aaaccaaagggctgtcgttagctgccagcattgcaatatagtagggcaagcaagccaatataaggtgaagaacctgaaatagtgaatgtaaa  
agaaatgtacaataggatacaggtagaaggtatattgttacgaaccataagccaccgatagcttctgctcctcgtttgtaacctcctttacgata  
gtaattatagttaatcgaatactccacagcaattgcaaaaacaccataatcatcagccgacgagaagcaatgtaataaaaaatccataaagc  
agaaaatgaactgaaaatagagtcggtaaaattggccatgcgcatccacttgggacgtgttctgcttggacagataccgcccacaggaaaa  
ccccaacatcaaagcaaggattaatccagtgacaagggatttgtttcaacataaaaactcacgaaatcccatattcctgacagaagcaacttc  
acattgctcgttctcctcaaaaagggagaaacggccatcgtccaactggcggaattagaagccgagtaaattgtcggtaaaactagatatcaatgt  
catatctcaaattggcataaagtaaatccgttttcagacgttttggaaaagactcttcttaactgacttctgctcaactgacgttactggaca  
cgagaatagtgagacataatgagaaagacatttctgattcacagattcaaaaattattctcaaaaggatgcctgttttaatttggtttctcttggat  
ataaacaaggtttctcaattgatgtctggtatgaaaactgcaatttaattgttttaccagtcgtcaacgaggatagcttctgagatttacacg  
acataacttactctttatcgtaaaagttccatcattttgtctgtgataactgagaacgggtggaattctgctgacctcatgctcaacccaata  
ttgctcttcccttgacgatcaactagacgttcttctgtctccatctgattgattttatgcagtaagtttttctcctggttaagatcctctgtaa  
atatgatttgcaatttccatgttttatgcacctgcgcttctctgaaagcagacgctatcagaggtagaatgattttgtaacttctataataggaa  
cttcaggggataggaatgccatacatctcttaagtcctatcatttaataagagccgattgtcaaatccacaaacgtcctttttatccctcccgtt  
ctttgaattctggacgagaacccgtgaagcatcctttataagctgaaggaagtgtcttcttcttgagtaaaattaaggttctcttcagcaaaatt  
agattacggctcaaaaacttcaaactctctgcttcaaatcgtacacgttctctgggataattgtgtctggttaaagaaggcgctggttaccaagat  
tgcgaaattctgaaagttatcggcaacctgggtcaatgtcttaacgaagaaagatcaattgtagtcttaagcttagatcgcagatgaatagga  
caccgttctatgacaacaatactcagatgagatttcagcgggctttgagcattcctcagctctacacttcttttccatgacgtcaaacaccgtcca  
ctagctgtgcaacttggacaaaagtagctgagctgtaattcatcaaatgactctggaatgtttgacacattctcatgaaaccagcttccaacat  
cacatccaacatccatctacatcatcgggacctctacacagacaataaacaggccttcaaactctgatttacagaagatcctattcctggtt  
tgttcttcgaggtcctttacgggttacggttctgttggcttcttggaaattgtctgacttagctggtgtaattctgtatcagtttctgtacttgatgatt  
caggagattggattcttctgttacttttgatggttctggtattgaacctccttaatatcatatttgccaactcctgaaaattctggttagatgct  
attggtaaaattgaatcctctattttaacacgttcggattcatcgacattcattgaagtttgattaccatcgctggaaaacacatgcctttgaagttt  
ttatcagcttccaggtgtttgtttcataccacgtgtttaaggcattcaaacgcttctccttatatagatgtatgaaaaaagcataaaaaacaaaa  
ggaaacgtatttcaatctctttaaactctagaagacaataaaaaaatataacaatcattgttcaaagagaggacttatgagttttagcaggatt  
tgatcagatgattattaagaaattgaaatttgaaacgaaaatcaaatgaattcataaacgtgattatcctcattagaccgtaaaggtgattaa  
tgatcaaaaataaaggtgaattcaacatgaaatagcctgtgaaatataataagagattgaaagaataaataaataatccatcttttgcctttct  
taacctagtcgacgaagccgatcttagtctacgacttttctcggtttgatcggatcatgtgacaaatcgtccaacatggcattctgctcaat  
gagttcattgttaatagtcatagaagctcttttctgctttattatcggtagtaacgttctgcttgagagcttattgttaagcttggttttaa  
gttggtaaagaccaacattgtcaagcttttagtactggcgtctctagagagcggcttttctaaaactctattggaagaggagtagaacgaa  
gagaaggctgctgatcagaggaagaggatattggattgaacggtagctaggactggagaaagcagtgacctcagcagaggatttaggagag  
ctcgtagggtgagtgatactttcattattttgataagaaaaagcctgaagatagttgatctaacaatcacgcttcggaacacctcgcag  
aacctagggtcatttctctagccgattgagtgaaagtagctagaagatctatagaccttttagtagtatacacacttttctgtctccagaaata  
gaactagttttccgaaagtaaatcaactctgaagcatgcaattctcgttgcattcatgaaacaattgaatccattccacaggaccaaggtg  
cttcttctgtaatgtccttaacattatcctctatgtccaaaactttttacttggctcatttctatccacgggctttactcaattctttacatactct  
gcaagctactcggcgagattcacgaaatttctgtttaccacggttattgaaaccaagacttgaaggaagattcggtaacgtgtctttaccatc  
aaaaggtctaattcttcatcaaaactgcaaaaactcgtgaatcgtcgaagacaattctacgtaagctattgggaaaggatactcaatgtgata  
tacggtccaccgcaatttctgcttcttctactatagttaactatttcttcttttcttcttactctgtagtatttttgattttcaattgaattggcgc

catactggcaaaagtatacattatttacgtgtacttactccctatatgactgatttaacgaaatcaaccgtatctggatattgagaacaacattct  
acgctaaatcccattggtaaacaaataagtaaaaaaagaactcctgaaataaactgcaattcaataacaaagagtagtcagatgttata  
tggagttgtttaagaaagtacattctacttgcggactggtgaattgacttttgtcatgttagaatgctaaaagttacacatatacaccag  
aaagaaaagaattgtactttgcaacttcatatgatgataagcatgatgacgatacttataacttattttggatattcagtgagtttgaatgctc  
agatggaggcttggagcaatgaaggtttccatgtttatattgactttctagtaatatgatttgacatttctgtatttacttcattaaaggttcattat  
attgagttgtttttttctacagttggactatgaaggagttattgagttctatgaaaaaaaaaaaaaaaaaaaaaaaaaattgttatacagac  
cagcttgaacgtacatgcataatagctgcaaaactcgttattacaaccattataaacgaagggaatcttgattatgtttcgtcaaatcaggtacc  
aacataaaatgaattgatataattcattgagacctttcaaagatgtgttgcgggttcttctctgaaagttatagaatgcaatccgatcgatgat  
agttcaaaagttccgcaaacgttctagtagaaaaatcaagtcattcttaaaaaaagaattagaaaaatagaggaaatataactaaaaa  
ggcttaaaactaacctactttgagttgaaataaaaatatataaaaattcacaatgaatattaatggaatcattaaagaataacacctgt  
acacatttagaaaaaccaagaaacataaatgcttcaataacagcattttaaacaattcatagacagcaaacacacatgaaaagtttcaata  
accgtaaaaggggggataagaatgactttgatatgaaacagaaaatcttaccaggaagaaggtgaagacaaaagataacatcgacttcta  
aatcccttgcgctcatagagaaatgcccagcagacaagaatcacaatgacggcttgggtaataaagtaaacataactgacacattgggat  
ccaatggggcaaaaacaaatggtaaggggacggcgaattccagatggaagaataaccattagcataagagattgaagcatgttctgctt  
ctcaaagactagcttttgaaacatagccaataggaacatgtgcaatgtactgtaaggaagaggaggagcaattaagctagtaacgacgtca  
cgaacattaccaaggacaatcgagtttaggtacagcttttgggtagaataataaacacactaatcaagacactggccataaattgtaacaagg  
tggtaatgctggcacgcgtcatgcttcacgagagagtcgaggatgcaagcattgggtgcctgcgagcagcagcaagaacagggcatctat  
agcaaaagaccaagcagattgccaagagacagagatagtagtggaacaataaaatatacaagggatactttgcaactaaataccagctgat  
accaaggttgaagtaatacgtcagaacgactgaatcgcgatgcatcaaaaatattacatagcactaaattttcaacggttaggaaagataat  
caacaagctcatctctatgaaacctaccatccaatcaggaatattttgtttacaacaccggtcagtgccagcaaacgaggatttaagtgcata  
tttaacgctccatacgtgattgtatgcacagaaacataagcagatggctcgaagagttcgagaaagacgcaataaactttttctatcatctcgata  
atattggtagttgcaagtgcacatggtgtctattggaaatagtgaaacctgaacgaactaaatctcgatagctgctgcaaggattctcaaaaaat  
gtcctgaaaaaatgaatggaacttgcttaataaaaataattgaaagaagtaattttattcaacttaagcctcaggaattgaattctttcaattga  
acctatcgatcattcatctttgtccctgttgataacatagaagcctattcttcaacaacatacagatacaatacatcttttaagtacctcata  
gatgtaacatattttataccttgcctatgtataaatggaatattacaaaatctaccacctacgcttttatttaccatttaacgaattgg  
ctaactcataaattggattagaatctctagcaaaattgttaaatttttcttgcggaacgttctacacgctatcccgtaacctttacctgttta  
ttgctgggataaccaactctcaatcaaccaatactccccctcctcagatggtaagttataacaaaacaaatcatctgtttctgtgtaacaaa  
tgatttaaggctagttctacgatctataatattttttcagaaaaactcttcttctacgctactattttcgtgtagctttttcgtaaagtgatgt  
gttcttggagaacacgaggatttttggtagagcttgttactaacagtatagtggttcttctgactgacaaggtttgggagaatgcaaat  
gctggtgaagtgctttttcatctttgtctccctcagcttctcttttcaactcattattatagatgcaatggaaggatgcaagcctcgtcttca  
aacaacgatgaagaagaggaataaatactgttcggggatttcttctttgtgttctgtacagtcctcccactgctgtaaacaaatcaataact  
tttgaagctgctcagtgatataaccctcatttccctcttattcttttactttcagaactgcaatgccttttagttcaattcgttcttttaacatc  
tttcaacgaataaatttaatttcgcaagtcattcttctcatgagctgatctgttctttgtcttgaatcaaatgaaattgtagctcaaagtcatt  
tcttactaaatgtactactaaaatacatgcaaaagctgtatactgtccatattgaaggcttcagcagattcgaaaaactaatgaaaagaataaa  
agaaggttaattgccgacaatcttaataaaaaataaaaaagtagtaagaaaaaaatgtatacaagacttcacctgtgtctccgctcttt  
atttgattctataaattgatcaaaagaatgaatagtagatgacaaaacatatactttaaatacggtagatcatatttccgaaaacatgattttgt  
tttggcgctcatctttcaaggcagagattgcctcttcttgaaggaagcgtgatcttcaactcctgaattatcgcgcttagaacattctcca  
gagacgcacattctccgaaaacacatctgtcttggcaactccgacaagcagacataaaattgtcatctttccctcgataaagcaacacct  
gagaagaggaagtattactctgaagccgacttgtatctgcattgccactacgtgacttctgctccattgtctcttagcagttgtcggaaaggt  
cgaatggctagaaggccatgataactgagttggatgcaattcctatatgtaattgactgcatcactggttccgtggctgtatagattgattg  
ttgtggaagcagcatcaatattcatttggcttcttacttctgttttgaacttgagaacgcgtctgtcggttgaaccagacgcattcggttt  
gtagcttggaaatgtgggatcatcgttcaagtcacatcagcccctatttctctgagtcctatgtcttctctcggaaacttctctgcttcaactct  
ccttcttgcgttcttttacggcgatttgatttggcttaacaacttctgaacaaagcataacgaaggatctttcagcagccttggcatctcgt  
acttcaactgcattgcttaactgctttcgcagcagactcaaacgaatcaacgtttcaacgtacgagccgtaagaggactagtagcgcgt  
tgattacctgcaagtcacgttctgtaggcccacaatatattagtgatgactctgagtagcttggtaagcactgggtttattcgagattggcg  
tattggatataattacgaacaaaattatattaataactccttctgcttctgagcgttagcatgtagcaaacgtgaaaatgtttccaaaccggt  
gtttccgattctgctcatttccggcagaaaccctgcagcatttgcgaccaacatttaagactgagttaatgagctctaacaggagtgcc  
aggttccaaaccggcggttaaatagcagatgattcttaaaacatgttcaactaaagcagcgtccttctgtcatcaatcatctgtaacaataat

aataagtcgaaacgagaaagcatggaatccggaagagctatattcttgtaggatctttcgaatcatattggccataaattggattcgctgct  
gccacaacactgcatcttgcttcaaagaggatggataccggcttagcaatggaactgtctgttgccttacttcatgaatagcgacacgat  
caatgtcactcatcttcatgaattcatcaatacaaaactcctcgatcagctaaaaccattgcaccggcttctaaacggcgctcaccggttccct  
gtcagaagttacagcagctgtaagaccaacacctgatgaaccacgtccgggttgcatagctaaaggagctgtathtaatacaaaagcgaagt  
aattgagatttggcgttgagggatcaccaccattaaaatgttgatatacaccagcaatgtgtaccattggaaagatttttctgtaccacca  
aaagtaaaagcaaaattgcctgtttaatgtgctcaaatccgtaaatgctaggagccaaactggggaaagaagctcaaaagcattttttctag  
ctaactattgatattcgaatataccgcgtcggttaattgtcaagcccctccaccaacgttcccactactggcttattctcaggagtacaacgtta  
tttgcgagcaaaacggtaacgaaactggcactgtacttccagagttttggatcccatagaacggattgcccacaatatgtactcgatcacct  
ggcttactgtatctaccaatcatcatcgagtaaaatcaatggatcgaggaattgaccggagggtgctgcttccggcatttctgaaggaa  
attgtttgatgatctcgaaggtctatagccgaattcaatagaagaggattaccatttcatctgcttggataaacagtagactgaaacgaa  
agaccaccgttattgtagaatcagcactgtttgaaatgatgacgcttagtagcttcacagtaatgtatagacttaataactttgggacgaaca  
aacgaacatctgtcacaattccttcgagagaaatcattttgtcaaatgcaaaccttaagtagcaggtgttcatgtaaatcaccaaaagag  
ccacgaaatcaatataaaagggttatcctttaaactttgacgataggatcgatcagtgactaatcactccctgaagagcttattaag  
ggttcggcaaatccatgggctggtagagaattccgtctgtaactccttattataatcggaagttcatcgatgttaacaatcaagcgttcttccc  
catattaagcattctaagaatcgcttcatgatacaatgttgactcgcacggaatcgctcaagatattcttgaaaaaatccttacaggtcct  
taaaaacctatccgccaacaattccgacatgggtgttcttaagcagcaaacagctaacgttagcgacgctctttaaattttttatctccc  
ttaaactcagcctaagaaacctctttaaactatatactggtaacatagtaattagatgatgagaaaatattaattttgggttcttgtcaagc  
aggttgtttacagtaattgttttagcttggagtgatcttctgaatcttccctaaagtatagtaacatgttaccataaaacattgtatgtattatt  
tacaacagaaacagtagactaaatcgaatagtcagcttattatgatgaattactttgataaaataatcttacttggagcttcaaattttgtg  
ggttttgaatcttcaaaaacagatgcaagaacttaagtctaatgtcaacaacgtcctgctgaagtaaaccaatctatctatgtaattaaa  
agtaagactgcaaatcagtatatgattgtaacatgcacatccgggagatattaagatattaatcatttgagccttgttctgaattgttctcg  
ttaatctaagatataggaattttttcattcatgactttaccagcttataatctgacataagatcccaccataagttgcgataaccctctac  
aagctgctcatccggtatggcccaaacgacctgataatccacatctgaccatatttgattttgtaacgatgcttctgtctaatgaacttt  
cacttcttatcattcgaggaatgactcgtcctgattttcagagatttccgggtgtatgtattggcattcaagcctatgatggtaaatcgcagtag  
actgccaggagaaactcaacatctaaattgtacttttgatataaggaaccgattgtaggaatgatcaacttgattgtatctgaatcgaaggt  
agaagtttgcctcactcgaactttgctctcatccgttatatacagatctatccgctaaacccaatcgctggcatagactctatattgaccat  
atttttcagtaacttgatttttacgacggagatttctagattcgtagcagagctccagaaccaggaggctgaactgaagttgaactattcag  
gtcttattgtcaggttcatgaaaagaacgatattggaacgtcattttatcttcagcagaccgaaaatcagaagtagtaattcaactgaatc  
ggtccgagatcaccgaaacgcttatatacaatcacttgcgtgctcaaacacaggttcagctttatcgttaggggaggacttcaggaaattgc  
agagtcaaaaagtgctccttccacatcattgtgctccagaacaaagggctcctggttgggtgatgcaaacgagaagaatcacgaaaat  
aagacatttctgttctgtttagagaatgagaaaatccagatgtattgcttctgtcacgctggttattgtcctatatagtgatccaactttcag  
aattggaagagtactgtcgtggatgaagagtcaggttgaagtcttctgcagaagaagaactgctctctgagcttccgtctctgaagaag  
tggcagctgtagatacagaagtagatcagaagaacagacacagaaacggcagatgaggattcctcggaagaagcatcggattctgaagatt  
cgctcggagaagatttttgggtattccttgttttaatgggttgtgttattctgaagggtagtggaaggttgaacttttcttcttattgggtg  
aaagtaatttcaactcctgtagaatgattcaactgtcttcttggatgtgacgtgtcattccatgccgatggggcagctgcatcacgcttttctgg  
aaaagtagctattattggagttcgtagggtaagaggaactaaactaatgttactggttccggagcttgagtttgaaggtgagctttact  
tcccctaccctgaatgttgttctcattcttgaagagctgtgctcagagaagtgatgactcaaccgtaagccatgacttcgagcctcgagct  
aacgcttcccttaggaaggcagcaattctaactctgaaatcgctcaaaaataaatgatatgcatagatcggtaaagcaaaagtcact  
ttaccagttgtaaaaaagttcatttctaatgcatattggcttattcctggccctacaaggatagatcgctcatcttacaatctcaaaat  
aaataacagtatactatacaaaaatcagcaatagagctagttttatcagaaagttcaattcagcaggttgatccactgctgcataggatca  
aaggctcacgcttgaattctagaagcatcgtaacttcaaatcttgattttatgctgctgactataaccataaacgttataaaactcataa  
attataatcctattagaacgattataaaaacctaagctttttttccctgagatttctgacttttcatatagaggagaaagatggtttgt  
ttactgttggactatttctcacaacatacgtggatagcgcattacgggtgaatattggtatcatcttattgaactcgaagttgtcggattttgta  
aatagttgtaacagacagacaacaacctgccttttcaattcaatgtttgcaaacgcgagctaaaagcgtccagagctacttctcta  
cgctcgcgagattaaccgattatgctccagctcgtgtagaaatcacagaagaacaacgacaagatatccatgaggcttcaagttgttactcg  
gacaaagacaatgcaattgattaccatgaattcgggctgctatgctgactaggttaattgcagaaaaacagaggtacttaaaattctacg  
tgactttgataaaactgggaaggatacctcaaatggaagattttgtcgcgctcagtaagttcctctatagcatctgaagtatactatctcatga  
atattggctaatataatacagtgactgaaaaagttgtgaacgggatcctttagaagagattaaacgtgcttttgagctgttgacgatgaa

ctggtaaattagatatacggaaatcttctgctgcttgctaaagagttgaatgaaaacattgatgatcaagaactagaagcgatgattgaagagttt  
gatcttgatcaagacgggtaaattaatgaacaggaattataagtataatgatggatgaagcctaaaatatacactagcaatcgaattactggttt  
cattcctctcggattccctatacaacatggtccaagcgaatattttgtcttctactctctcgtttccaactcttctgctggtgataatactttat  
ttataaaaacattaatagtaaatggttattattttctccaagtagacttcgaaagaaacctttgcttctcggatggaagctcctctgtttcc  
tcttctgtggttggctttccaaattctgttctgacccaggtatgtaatagctaaatcaaagaaaagtggtttggcaggaatagggcgcaatt  
cagctgagtaaaatcaagggttctccgattccgtagttacatactgatccatagactcgactagcgataaatccttaggttttggttaatcattc  
cagagaagccaaactacgcaaaagcaaaatcgtttctcaaactcattaggcctgtttgtaattccatgacaatatcgaaagctattccagagg  
attttctcaaaattatgaaggtaatcattgcttctcataatattggcctgcacgaatacacatagcaagccttggcttctgcttgattgata  
ggcatcggaatgacttggcagcgccttcttaacaatagcaattgagcttcagctgtaccatcatgccattatctttgcgatacctggtaagc  
tttggcagcttcaatgttctatattatagttagacagtttgaatacataaaaaaacagcatacctttataattgatcacaagctttgttagct  
ctaaggttgctaaagaattctgacggctggcagttcctgagtagaattgctccgttgaattcggagcagcagataaggttgaagcaagataacta  
tagcagattgagagttctgatactcattgcttctcgggagaaatactatctaaaacgcttttctcggcattagcccaagcacaagcaa  
gcgatcatcaactgtagtagaaacatccatacctgcttggcagctatggataccatataacgccaacacaattctgggtgtgtaactggtggtt  
tgatcgcgcaagtgattcagtgatggagcaggtaccagcttgatctctgcattcgattctaatactgaggggttagaactgaaatgttga  
caattaagtctctttgaaacatttgaagcataaggatgtctaatgattgcttgggtttctaaaccgctgcgctgggagacatagcgaattgta  
gagtcgatttgctagtagctcattgaaaactccccgttgggttctgataatgctcaagagatcgctgtaattgttggatgctaaacgagagg  
aactgaatgaacgcaaagagtcctccatgatcgtttctataaaaaatgtaccttcaatgtattcataaacgcagcagcctctaaaataaaaa  
tatgattattatgatctttgactcaaaaaagaaaccaattccttgaggttgcagagcccgtttaagcgtcgaagagcattgacgttgaga  
agaccgtaagtatgtatattgctggaatgcgcatcagcatcaaacagttggattccgcaaaccttctaagattagctgcttcaaacctat  
ttccttctctagttacgtacctcttatcagccgagcttctggcttccaccttctgagtagaattttaaagctttcttaaggaatgaatgcgctgtg  
ataagtacttcatatactcatttcttataaaaaatgatcagagcagcctctaaaagcaacggtaacagataaaaaactgcttttccatgtttg  
aagaattggctctgcacacgcgattagttcaacctaagttctgcttctgcacacaatacatcactaagcttcgaaaagcgtttaaccacaccgc  
tgcaatatcttaccttaattatggaagtctatcttttcttactgatatttctggccttctgtctattttctatcttaatttacgaactgaaatgcct  
acgttagtaacaacagcccggattatggaatagtagtattctagcattgttataattttaaataatttagacaagttattcagctagtagtgtttc  
taagaggaagtagaaggattatcaggaggaaggtaagcatcttctcaggttattgttgggtgctgtacatgatcctccattttgtataagt  
tttctcttggcttattctctagttcaaggagactgtttattctactagctctcagaatcttataagacgaaaacattgttgggtagtaggt  
ctgaaagcttcgactttatcgtttcatgaaagaaagcattcagaacatgttaagtaactgcccataattttatacttaatttaactaatgtaaca  
gaaataaaaagttccaatctcagaagcccacaaaatccaacttcaatttttctattcattcgctatattgctttagtaacaaaaaaaagc  
acaggtctttctataatcgatatacaaatgctagaatacaaatccttaacaatattgttcttggacgactataggccaaagagcccacaaac  
gatactatgtgcatttgttctactgaccttgaagtcaccacttcatcaaccaagaagcaacaaagcgaacaaagcagtttccaaaacacag  
ataagtggttgttgaatggaagaagcaataggaatgaatgtggcaggaagaaatattgttcttctgaaactatacaaaatgcaactcc  
ctctgttagagccgactcttctcatgaaactagggatttcaatgaaaacgaaagcatcaaacgaaagattttggattatcagagggcatagac  
gaggttctttagcgaaggacaatacactgctgggaaagatgtcttcttaggtgttcaaacctgctggtttgatcaactacaaggctgaaggg  
aaggatgaacatagggatgaaagttatttctcgaatctctcagacaggaagcggataaaatcacaaagtcgggattagaatcttctgctctat  
gaccaaagcctttagtgattcagcgttttaggttatttctgaatgggaaggtacaaatttctcgcgaaagaagcaaaagaccattcttta  
cagaatgtcctctttatctatgacgagttttacatgaagtggtctccgatgttccatctgttcaacggattcatctcaacaggtttattatc  
attatgtgctttgattcaaggattcgaacttcttattccttggatgatgaaaatcaaccttctgtgccaactgtgtttctatgtcaggaaca  
tctcagcttctttacgagttctgctgcaagtttcttattggcaatttaacgcaaatctttaaagaaaatatacggcagtgcaattgct  
caatttactgtttaaattctgttccaacggtattactcagtagtcaataagttacaagcttggttatttgaatcactaccaatgtgtggaatt  
tatcgcttagagtttatccaaaatttctccttggatatacttgaatgttttgatattccgcttctcagacaagatgctgtatcgataatg  
aatgctcttatgattatacaaatatgtccagaataccaaagattatccgtagcttctcagtgcttcttattgttctgacctttttctaaaat  
taaatacgacattggactttactgtttcaataagcacatacaaaactatatcaagtcatttccaaacttttccctctgatctcgtttgcttcttc  
tgaattttaaagctttcactatgattcaagaatctctgacttctgaagcattacggccaaagttagctactcctttaaagctggtttctcctt  
ggtgaaaactttctacatctcaaccaaaggcatcactaaattatcagtaaacgagtttcaactgagaaattatacctaggtgaaagaagatgat  
ttgaaagtcagctacaaaagatgaatgacaccaaagtcgatgatgaacttctgacttctcagaaaggtacagatagaacgttacca  
ttgaatcttataatgagttatgtgtctataatccgattcaggactacatttttagtacttatgcaaccgtgtatcattcctattcacgacgttttg  
ctgctcaggtattttactacaaaacgtatgctgtttcagagctcatctttgtgacgaatgaatgtcctatatacgggacgatttctcagatt  
agatgattcaagctcatttgaacatgattgttctgcttcttctcaaccagtttacaattcacgaaatcgaacgcttgggttagatgatt

tgcgagctctcatattcaagtcttttactacaacaaaggagaaacccgacctaacacgttcggcgctttaagtctaaattgccgatttcagga  
ccgttacaaatgttattcccgaaaaagattgtatctctattctgaaatatttccgactatcctatttcttgaacaaaaagcgtccatcgaat  
gaattcaacagagtcagcagcttgggacaagaaagccagaattcaaaaatggtttttaccagaatataaaaatgtcgttatgatctagta  
catgttattattccagaagccatgtcttctttaccaagtatttccatcccttccaactttctgacagacacaccgatcagctatttcttctgagat  
aatgagaaacatacaaaaatcctgactaataatgaaagacatagaagccaagatagattccttcgacaatgcaaaggaaacagtgtaa  
ataagaatttctaagctacacttagacaatagacttctgtagaaatgatttgaataattataaataaacaatcagtaactataaaaatattg  
tagatgcataaatttaaaggaaatggaaataagtggtccaagaactgaatcactattgagagattaataaataaaaacaagttttctggaa  
attgagataattggttttttctggatataaaaaaaaaaaaaaacttatcacaataaagtaagtagcccaaaaagaaagaagaatg  
acaaaagagaagaacaaaacctaagaagaatgaaacggcactgatcataataacgtaaaaaggccaacaaaccaataaagatact  
gcgggaaggtaaagtataatttgcagcgtattgaaaggttaaaaaggcaagggtatcgattaccacagaattagatgagttaccaaacgaaa  
gcgtcattgcggtaacggtaaatagcggttttaggttaacagcagtgctgactgaggtttggaaagagcagcagcggctgctattgg  
tatacacacaaataccttggtctggtagccaacattcggcaagtagcaccgcaaaaaggagtgctaaagcagaattgagttgactggat  
tgagtaccattgaagcaagtataaccaagtagggatactcctgctgtagtaagcttggtaagcccactcgtcaaggggaattgcgagcaa  
gagaagaggttttcaacaacgttagagtagctaaagagagtttagggaaggcactcttctggtgttttggaggagatgattcagatcgaaa  
ttggaagaattggtcttccggaataattgaggcaccgattggcagagaccggttaagaccgtaggaaggtctgtggcaatgcaggaggc  
acctgaccagtagggtaaccaagaacagtgggacaattaaaaggacagtagtattggtggcacagatgcaatgactgaggagatcgca  
aagattggatccagaacatggcagaatgttcttcagatagtattatagtaagaagtagggcgttttggctcatgtcatataacgcagagcg  
ttttcgagaccatcgggttgaaagcagcacatgctgaaacaaaacaaggactagaagaccgcagaaagaggactagtgatagagaatga  
tgccattgtagaggagaaagaagagataatttctgaaattggcaatgataggtgaaggcggcaaaaactttttacgtaaaaacgaacaaa  
tggtataacaagaaaaatgggtaacaaataacaactcagaagcttttctgaacaacaattaccttttaaggcttttaggaagattgtgtatag  
tggaacgtagctcaaggttgcggaggcgtgtatataataatagataagtaatttggttacatccatcgtagaaggatctacgtggcgacca  
agtttacgagccaatcaggtcccgtaacgggcgttatcgttaacctagcaactactctacgtagttaaataaataacaatagtcagctg  
catgtaaacagccaccggtagatgaacctgatgaatcaagcagcaaaaatgtgacaatttcatggtaccatgaaaaatccatttctctat  
aatttctagaaagtttaaaccttactcgttcttaggcttctggaataacattattatcatcacttggagactattagcatgaacaatt  
tgagaatccttctgattagacatagagtagtaacctcatttggtagactgttgcaatgaccttgacaacaattggatcatccatggagatt  
cgtctcgataggaactgaaaatgaatgagggcggatcgtacataatgaagagcgtatcgaagctatgcagggtttgcgtaatgtgtgg  
gtgatagaccgggtgatgttacagtagagtgagtaggatgaaacgaagtcgcaattgaaatacaaatgcgcgcttttctgcaacttc  
cagctttaaatacctcagttgaaatgcctttcaactggttattgaaattgtaactttctgtaagtagtcttgcacatacattgtctgaca  
atcgagttctcatagtcgcttttattattagttataatcgttgaaaagacacacacacacacatgtacatacaaaaaatggatactg  
tagtttccctatatgaaaaaattattgttttatcatttaattatttggcatttgaagttttgattgtatagccataacaacaatatt  
tgcgtggatggaatcaattgaaattccttctctcttttacccttgcacgattttttagtcaactgagcatatttttcttaagaaggt  
taatttctgatagtcatttcatctatggctagtacaattcttatataattgcgattcatcccgttagagttagaaaagcgtccatcctacataat  
atgcgtcacagcacaacctttcaaatcccaacatgcagctttattgttctagatcagaaactaatgtagaatcactccgtagtatcatg  
atattcccatttccataaaaaatgaacctttgtttacatccagtagcagggtaacaatttcttcttacttggagcacctacatgacgctgctc  
tgaaaggacacgcacctctgccaacgcttttctttaaagatgtctgacagcatcaatttctgacgctggatataatttactacgattctta  
aacgtaagttcgtagcagcagcagcatttctggttgcattatcggttctcgaaccttttactaatcattgctatattgtagattggaag  
cagcaacctctgtttagaggatctagtgaaagtgccatgaacctctcaacttgcacgctcagagatcacaacgctcagactcata  
acatttctggttgcctctatgcctccagaatggttgaccagtagccctgcatcgtgctgtaaggaaaatgcttctctagcgtaacacctg  
cagggtagcagctcaagtagtattctgattaaattctccctcatcgtgcatatgatgagtttctcaaacacctgaatgagtatattca  
attaagcaagaagctcggtaggactgtgaaacaaaagtaagcatgtgaaaaagcgttcaagctgttacgggtatctggtagtgccatga  
aagcaagaaacggactatgagctcctgaattttcagattttgaaacctattcaatccgaactccttagtactcgaatattcgtgatgaaaa  
ccgactgctcctgagtttaacagctctaccgttatgagcggatcagcgtctgggtgggtcaccattgaacctgcacctgttcttcatgct  
agaaaagaggttctcccaatttatgcaaacggctttaaaggattcaaggggaaagacgagcttcaagtttctgggtcgttcttaccct  
actttgtgggtgagcttattaattatgcaagcttattcaaaaaccggttgggttggtcgaacaagccagatgcttctcttgaaggagattat  
gaaagcactactagcaagcaacaagatgaatctcaagcaattcaactcggagcaagtggttgcctcctcctccccctcctccaccat  
ccaatgagtttggaaagacaaggaagagcaaaaggaagaagaaactgacatgggtgcttcttctgaaattaataaaggagagaaac  
atcacctctggtcttcaaaaagtgataagagtgaaatgacacataagaacctgacttacgaaagaccggtcctactcctggtcctaagccaa  
gatgcatctcggatgccaagcaagaagcagctactccagctaactcaacaaaagcaccacgtattgagttggagaatacaaatggttcgct

gaaaatcaagtcaacaacatagattgtattggaaggcgttgaattgaagcacactgttcaaatccttgactgttccaactgcactttaatcatca  
agggaaagctcaacgctgtatcctgtcaaactgcaagcgtacaagtggtcgtcgacacttgggtgccgcttgaagttaccaaatgtagta  
acttcggctgtcaagtcattgacgttctatgattgtgtgatcagtgatggaggagccgttatttgagcaaaaattcttaagtagcagag  
attactactagcaaatcatccggttgaacgtgaatgttctgttgacgatggcgactatgccgaacgtgctatccctgaacaagttaagcacagg  
attaacgaaaagggagagcttgttccgaaatcgctcgtatgaataaatgtgggatgctatgagaagacgaaatgaggataggcatgaggtc  
gattgactaaaccttcatcacttttcttgagaagttacgacatgactatgaatattgttgggttttcaagctgcctcattaaggtagcatctca  
aactccaagatgatttcaactggattgtgtcatcgatttaatgatgtcttattttatcttttctgtgtaacagaagaacgtatacaacacctt  
ttgaaggaaaatacatgcctctacatgctgatgtttacgatgaataatgtgaatgatgtgaatgatgctgatataccttgagctatacgtattg  
atatacacttaagaggaagaaattgggtttgttctatttctcgttttgatattgttctattagaatctgaaagacatccatccatccgttcc  
atcgttaagcatattagcttttgagaagcttagatactgcttaactcctctttatagaatattcaatttgtttgtaatttagatatcttg  
attcttacttaattctaaaactgtaaatggtagcttttctcaaaatcgctccttgaacaaaaaagatggaaccgaaaagaaagtaataat  
caagaacagaaggtcgtcaaaacaagagacttctatcaggttcggcaataactactacaattcattagggcaaaaacaagaattcgttaatt  
gtataaatgagtagtggggaacgaagccttcggctattgaaacaaactctgttggtcagttctttgttcgggtattgatcgtatgggggaatac  
gtaaacgtagcagccctcagttcctggcgatgttccgtgagtatatacgtgatggaagggaaccataaactctcctttaccaaccccccttc  
aaagtaataaacgcaggcagaaagaaaactaaagtttcaaatcattcaaatcaactacgaaacacatactcgaagtaagttgctattgaattg  
ctgatgaaaatcattcacgacggccttgttgaatctacgcgaactgaggttggaaaagagcatacttataaaaaagagagaattatctgt  
gggaataaagcaattcatagcaagataaattgagaagatgaatagagtgagataataacagcacgagaatttctgagcaatggagttca  
atagccatattttcttactattggctcctcactctttttatgccattgatgtatctatccatcaaaaggtagatgtagcagcatgcttagt  
atcattctatttagaaagcaagcaaaagaagtttaactaaccccaaaatagaaaagctttacgagccttggaaaaatgatgataaaacag  
tttacaagattgggcatgaagatctgtatgcctcgcacctttcaactagctccagattaaattacaaggtagctgttttgggtgctggcgaggt  
attggccagccctgtctatgctttaaagacaaacacgaaggttctgaattagctcttttgatattaagggtgctgctgttgcagctgatgta  
ggccacatcaatacctctccaacgctcgtcggctattctccgatgacaagggtctcgaaggccttgaaggcgctgatgtggtgtcatccccg  
ctggtgtcctcgtaaacctggatgactcgtgatgattgttcaagaccaatgcttctatcgttcgggatttggccttcgctcgtggaagctgcac  
ctaagccaagtagcttgtgtaccaatcccgtcaactctactgttctatcttaagaaggccttggtcgtggtgttgaatcagcctaagcac  
ttgtttggtgctactactttgattctgtcgtgtagccgttctcgttcaagcaaaaatggccttctgaattactcagtagtattccggtgtcggg  
gtcattcaggtgctactattgtgcccctttgtctcaaggaaaggttaattgaccggtgctgaacgtgataacctcgtccaccgtattcaattggt  
ggtgacgaagtggtcaaggccaaggctggcgggaagcgtacttctatggcttattccggagcccgtatggcctcctgtcatccgtgctt  
tggatggtgaatccggcgttgaagaatgtacctttgtggagctcctttgtataaggatcaaggtattgactacttcttctcgttactttgggca  
aagatggtgttagactattcaccctgggccccattaatgaataggaaggtcttcaaggtcgtccttctgaattgaagaagagcattg  
aaaagggtgaacatttctgtgataaactatttctcgaaaaattccgattgctttccatcattctttaacctcaacgcaattcgtttatgatatct  
atgcttagattaaatccctcttttttcttaatacaacatttagttttattctatactactgtaagggtttctgcttcttgaatttctactgaact  
gtaaaaacgaattgacatcgaagtagtgaatgatgagaattttgcaatagagtagcagattttattgaagaaaattatgattcgtatt  
gacaaacaaaacatttatttttagaacatccttttgccttactactcctagatatacgcagccttagggcgaacttacgaaattctcttac  
caaaccggttgaacaccaaagttctgtagaaagtaaaatatacगतatagaatgccattgaaaagaaaacagaatataaatcaatagataa  
gcttgatcagaaattggtatttgcatttcttagtgaaaaagaggatgaactaacaatctcgcagattcaaaaggcttcgcagctttattaca  
atagctgagacaaaaggttacaatcctgagaagaaagatatttgaataaatacatttcatccgctgagaacgaatcgttaaggagg  
cccgacaaaatgtaagtaatttattcaagagttgacagatggatgacttcttccaattgaaagtgaattttcaagccgtttctcgtagaaa  
tggcagattgtttccagttccctaggtattgaaagttcataaggatttgttactcctcgggtattaggccaaaagaactgtattcactaac  
attatattagtttcttctaactcgggtttacatgcagaagatgcctgcttatttgaaggctctcagcaacaattgcaagacgaggtacaaaa  
gcaaggttggacgagatcattacaaaagtttagcattgcaaggttaaaatataaaacagtcacaaagaaaggtcagttacgtgatt  
ctcatagattttttaatggataaacgagctgcaaaagacgtgacggcattgatgggtacggttcttgcacaaaagaagataaaaacatttcaa  
tttccgtgatcaaaagaaagacacaattcgccatcaagtcgctcgttcttacattctacttctcagttatccgcccgtacaagtcattccatt  
ctatgaggattggcttctcagagtagtgacaattgcttcaaaatcgaagccatacttctgtcctgctagggaaaatacattcctagaggatgg  
aatgcatcagataatcgcataaaaacagccgacagtgctccttcttatttggagtcggaacaagcggctgctgagataaaaagaaggtg  
tgttccatccaagatagccgtcctcaacaaaaggagttacgagcaatgcaacggggtactcaagttcctaacaaacctctaaagctgcc  
ttactatgctatcgttgggtcattgacgtctaaggagtataatgtctgttctctgtaattattgactgttgaacgactatattatattat  
atatttttattttggataaataaaggctattggttgggtactacaacaattcaagagttccattttcaggcaagtatatggtaaggaggt  
cagtttgcatttgcgaagcagaattccaatcagtagtattcctatacatattcaaaatataatacctaataatcctaataatcctaataatcctaataat

gtttgctcatccaagctgtttattatttctcctttatagtaataataaataaggagctttgatttcataatgtacctccatctcaagcaagc  
taggaattctaaggaaagattcgttttctaaaaatcgagacgaagcaatccattatgaatatctgaatctttctgttttctacatttcggc  
tgcagtcgcttccaggatactttcattattcgcatttctgcatcttctgtaagcctcaaatgtagcaatgtcaaggctccaaggctaactttatt  
taaagatctgtaattgatgctaaagaaggtcctgtcttaacctcctatctcaaatcaacaataaggcagaacagctcctgtcaaatgctgatgct  
actacggttttctttaccaacctggtcttcaggcagaagactttcatttctgctttatctcatatgaagcgtatttcttggacgctgtctctcaat  
atatcttaccttattccaaggagcgtttgcaacctgatcgaacttaccgatcgaaaagctcttctcgaatagtaaacattgacctact  
catgagtcatttcccactttacaagaaccaaactcagtggtctccatgaaggattgtctttagatgctaaatcacgcgaacaagattatttg  
aattggatcaagttatttactcgttctactctactatctgatgatactgacttcaacttttctcacttcttccaaagcttgcaaacatgcaagt  
gttggaagatgacaaaactaaacaaaaggagaagccaagaagaaggagaagaaggacctcgcatactagactcaaacatttttaagatgaa  
tcgcttccgatgcaacaacatctccttccggtgaaagcatgaatgttcgaggcaattctctgattcgtaaccaacaagaacagaatgtaac  
tagtactgaaggcagtttattgatcgtatcaatttttaccaggaaattttatgggatctagctctagcagtttgggtcctactctgatcatt  
tcttgaagtgctctcatcattcagatcagctaccatgcgttcagcagccctcgtaaaagaatttatctgaaaagtaataactgttttgcttaa  
ttttgaaaagtgcaacggatactgtgttggtttatgtaaagcaaaaaagtgccgttaaaagataatgtagaaaagatgggtccttgggtccta  
aactaattctgtgagatgattttctgttaataggataaagtggttcaaacagtcgagaaatcatttggcagcttggcttataaaaa  
gaaaacccaatgaaatcgggcaaggaaatgactgactgtttgttcttcaattctctgatgaaacagatgttgattgaaatgtaactact  
ctgactattgtaatttagaaagcgcgaaccattacaattgaaaagccccctatgcgattacaattgggtccttggatttttctagagattata  
ttttatgaatgttttgacaacgttatttgaatcaagtacatgttgatgagttagaagagaatcagatgttggtttttacagctaattgtttca  
tattaattaataataatcaactttataatgcttcttcaactttgaaacaataatcaagatcagcatcctgtcacccctattattgtcaaca  
gctggaataacccttcttaacaaatttgagcttgattgtgtatctctataacatccgaataaattgttaattaattaagaggtagaagaa  
cacgagaggatcaatatggcacctgataatataatcgacctcatctcgatgctgaagggttccctaatcaaggaaactgaaacgctcatt  
tcggtgttaccttcttctggtgacaatgctgatcaacgttgcgggttattcactccttgaagctagaagaagaagaagaggatgatg  
atgaagaacctccattcatgattatgaagactacgcaagtaagcagaaggacgacgatctcaaaaagaaaaaggaagaaaacgggttca  
gagtaccaattatccataaagttactgctttcaagttttggcaatctcgggttaggagcaatattactacatggctgaagggttataca  
gaagccaaattatcactttgactgtacgatacgggaactgggtgtttaaaccaaattggctcagttactttggactgtagcaatagggttgcag  
tctcatatcgtttaatggatgtacgatccatctggttcttggaaacaaaacatcaaatcttctcaatttcaagtttttcaagatcttctgctc  
ttttgctactctacttctactatgaaggttaagttgaatccgcttccgttctgaattcgtgaagccttacaataaaaagaattttccgctaacaac  
ttgttcttagagattattgagcactcagagcacacattctttgctgcttattgctagcgtattaccatctggtatgtgttgaccttcaaaaaat  
ggatttactgtatcttgtgtaagatgattgttggcagataacgtattatgttttggtagatgctccctcaggttaagataaaaatggttgatt  
ctgtttgcttacgatttagtctgttcgaaactaacctccggaataccaatttcttactggatccccatgattctttctctgcctcaactattgagg  
aacgctggctccttctttaaagttttatgatgattataaaccttgattctttaaagattattcttctttttatgtttgtaattgttatggcatt  
ctagtatatgattatagcacaatgcttaaacactataggatttcttctcagctactttatataattttcattctgtctatggatacgttggctcaa  
aagacgatgattccatgcatcactcggaaaatgcctaatttaacaacagaaatggaaagtataactttcccgctccttctcgtccagttcatt  
ttttgattgtcagatcgcgaatgcttgaatatttgggttatcattttgaaagcgtattattcatcctaaaaagcaggaaggtaaacgaatact  
cgtgtatgaattctgttagtctgttttcttcttaaaatgtatttctgacagatttcatgctaaacgtttcattgtctgtagtacttgaatgtaagtg  
cattgattgataataacaacgagcaagggtgtatccagaaaagcttgatgaatccctctgaagatggattcattttatctatcgtgaatt  
gcattaaggtaaaaaacaacatagaaacgtatctattccaaaagttggcgtgacataccttaatttctttaaaagataaagataattatt  
atttgtaaaagtttacattcactccattgaaactacaatgtttaaattcatttctccttgtttattatttaacgttctctctacgcttactattgtc  
tcttggattgggaaacggttgcactactccaccagattttacctttctctatattcaagggaaggccaggcaaaaatttatatgtgattgtt  
tcatccttttaataaaaaaattattgctttgtaagttttgacttgcaggttcaattcgggtgtttttgactttgtttacgtgtcgtacgaatca  
aacgctactcatgagcatcttaattattaacaccattgactttaaactcgaatgtatcctatctgaggctgcaaatatattacacatgtctac  
atctcgaagatcttctttaaactcatcactgatattgactggcctttttaaactattgatttttctacatttctgatcaagtggttacgaattt  
gtgtataatttaaacatcatggacagtttcttcaaaccccttctcagaagcctaactcctccgcttcagagaaataattacaactaat  
atacagaccccgagctaggctttaaagaatcattaggaacaaaaccagataaccggttcaatggcgttgcaaacctccattggtagttcgagac  
cgagacacaaaaatccccttattcgcgggggatacaaaaagtgggcgaccatttttaaatcattgcaacaagtcagattcgaatataacga  
agattctttaggcctgaacccctactcaaatctgtctataatctctccttctgttacagcagaccagcttctgatcacttcaaatcttccg  
ggacatatcccaattggattgcaataaatccgtatactggtacttcttaggtgtgcccgttcttttcaaacatgagtcagatcgaagg  
ctcatttggctgtaagcttctgtccagcaagctagtggtctcaacttccggaaagcaactatggtcgttatagatgatgatgggtcgaagtg  
tgaagctgctcgcgacaaagcgtgcaagtgattgaagccgaatttctgaagaattatacaagcagagcaacaatgaaaaaagaagaaa

aagaaagagaagaagaagagagaaagaaagggaaagagaaagagaaagagaaagagaagaggaaatgaaggctattcatgaaactca  
aatgtgctccgtggagacgatcacaaaagaaccaaagtataacaaacagcagaatggaaactttgatttttcaaataaacttaagacaa  
acgatacttctgttccaaaagatatcgaaaactttatataatatttcatcgacgatagatttctctccgatcgcttactattccgatataaac  
accattttcgaaaatttcggtatgaaggatataatgaatagagatgggtttatattactttcaatagctaccggaagctagcagttgtttgg  
actctcgacaaaactttcgttcaaaattgtcgataaaattgaaacttcacgatgctcctcaatcgaagaagacggatctggcgcctactaataag  
aaaaagagttaccgaaagaggatgctgtacgacggcgatttctgtaatcctaaaagacttggagaagtattagtagcagacattaaaaaca  
agattgcaggacatgtattttcagattttggaatcatttccaaaaccgcacataaaagaagaagaaaaggacaaaaatttcgactctt  
gaggttctgaaactgaaaacggaagcaatcaacgtgccccatttaccagatttaaaaagcagcagatgcccaaaaataaaaactgc  
caactgagagcaaaaataaataaaaattgcaaaggagacgaaggaaaagattgagggcagacctttgcattatcaactaaatcaaaaactt  
acgattcttctgattccgaattgagcaagaagaggcactagatgaagaaaaggtttttgacggtaaatctgatggcttcaagcctagtaaggtg  
aggaatcaactcccttctctcagaacatctgaggatgaagaatatttggaaaaatttcaacggacgcgccccaaagtctcgttctctagacgg  
aaatctgacaagcttgatatagactataccttctctagcgaactgaatcggatgaattgtttcccctgctgttatctcaaaccactttgaaag  
atacaaaaagcatgctttagtgaaagacagcaggatatttccctgctaacgactaagcataaggagaatgagtttagtaagatggcggctgtg  
tttatggtagcctaccctataattatcctgaggatgatgtttgggtgatcggacggagttcaatattgttaaaagacgatcaagatcttcaatatt  
tacgtgaagcactcgctttagaggatgccaatgacattggggatccaattattgggcatttagacgaaaaatctgtaaatcaggaatggcgac  
gtttctgctgaaggttctctgactaccgcttctgttgggtatgaacgaatcaattcaactggatctgcaagaagtggggctactatattatacc  
cactgctgaaaaatccaatacttacctctccgtaatcgctcaacagtggaaaggtccaaccaatcgacaagtagagttacctccagaatgcatc  
gtgtaataaccgtagacttgcagccgggtgaaaaatcattacttccagctgaagctgattacttcttttaacgcattgaaagctcgtaaaga  
acaactcaactttggtcctagtcgattcactctcggctcttttgcgatggaaaatattgacaagaatgacatggttattgaaatggtggcgaa  
gtgattcgccagcgtattgctgacaatcgtgaaaagaattcgttcgggaaggtattggtgacagttatctttccgtattgacgaagatattatcg  
tcgatgctactaaaaagggaatattgcccaggtttattaaccatttctgtctcctaattgtattgctcgaattatctgtgtagaaggaaagaaaa  
aattgtcatttatgctgataggatcatgcaaggagaggagttacttatgactataaattccctgaggaggctgataaaatcccgtgtttgtg  
ggtgcctacctgctggttatttgaattaatagaccgctatactatagaagataatttgccttacttcttttctgtaacgacaacggaacttt  
tgatcgtgctccctcagagatctaatttaattgttgataattcactttagaagataatggaatttttggtttaaatttagcatttacaattagttc  
atagacttttataatgtgcaacttttacttaccatttggcacaatttagaactacataaatacaaaaagataaaaataaaaaatgaaatcacag  
ttacactttatgtctcaggtttacattagctagaatgaagcactgttgttcaatgtgcctgtcaccgcccttccaccagaaagctgtaaacatcaaa  
taataatgaagcgcgccagtttagggggccatagcctgtaacttaaatcattgaatgatgatgattggagaaaaagaaggctaaagaaa  
aaagcaggaaggaaagctgaattcagaagaagctcagcgttatttactcccagaagagaatctttaggaggaccaggctatggatcacc  
ctttaatagctcgtatcaagttcctgtttgtcctaacttgaagaatggatcaactagctaccgataataagatcaattcaaaaacacatggaac  
tttgactcatcgattttccatgatatgctttgcttgcgagatggagaagctatcaactttcaaaaagccagttgactctagatggatgtgtaa  
aatttatacatctcgaattgattcagttgctacagaaacaggaaagctacttagtgactcgcgaatgattccaaaacccttggtgaaattgaaga  
atctagcgaacgtagaagaggaagaaggaaggaagaaacgtgaacgaaaacgcgcgaatcgatctgtcaatacgttgctaaagatttcg  
aaagcttaccgggcaaacggttcgagttagaaggctcttttgatccattatttaaaaaatgtgtgcagattttgatgaggacgggtcaaaaagg  
cttttaatgaaccatttgcctcgtatcaacatggtaaaaatgttttgactccagtgacgctattattaaggatttagaaggaaatgatgatccga  
aggagaatgtttgaaaataatgcttctgaagatccagaaactggaatgagaataagagtacttatgccgatggtatttcttggaggccctg  
ggaagtattcaaaaacgttatttcttcatgattgatcaacttacgatttgccttcttcaagggtttgaattgataataaaggtaacctggatgtt  
tcattgctaaagtctttaaagtgatgaggtgaatatgattgcgccgaattcattgttagaagaacaagcagctatgaatggagatgtgaaattggc  
tcattaccgacggattctgaggaggatgataatgataatgagcaaggacacattgttcatgcaactgaagacatggcttacggtgatgaaaacat  
agacttatctcgaaaccattagatgagtttaggaaccaaaaagatacacgatgatacggaaagcaggtgaaactatcaatttagcgaat  
aattcagttgacaacttatcatcatcaatggaatttacgagatatttgacaagtcgataaagaagaactgggcccgtcccagcattggcgtatt  
caagctctacggaaaaggaggttttctcaggcccctggaatggattcttcaatgtttctgaggcgttgacaatactcgggtatcaaaattcttag  
aacgtagacggcgtcgtgaaagcagataacactatgacttttgaaggaggtgatctcgattctttgttactcctgcttccggttaattgaagctt  
ccgaaatcgattggaaaaaacgtaatcgatgcttactaccagatgactatcagatgattccagacggcttttacagctctttcttaaacaaaa  
gtatccctttaccgtttacatcatttaattgagaaaccgggtgtaaacaggtgtttgaaggacaggatgaagcagatactgctccatatacccta  
cgggatttgacgatgacagcgtatggcggagatggatggccaagcttgcattgaatttgatggaggatctatgcaagaatttcgggaaaacac  
aacatcacctacaccacctctctgctgggtttggagaaaatttactgaatgacgacttgcacaaccggatagattataattacgctaaacg  
agccaaaagagtagatgtaaggtattgaaagaaaacatctgaaatgcttagaccttgaagaaaataattcgcgtgaaacgtcgaatccaac  
gtcgaatcattccagaaggcgtgatgagctgaaagaagaagaaaaagaagaaccagtgcttaccttttctcaactgttgcactagagaa



atatgtatggtcaaaaggacctgaaggatatactacaagcttgcattatgtttattgacacctgctaataaagctcttaactgaccagt  
aacgaagactttcagatgtattcattcaacatgacctaatgtactagcttggagaagaatggaaaagaatgtaacatcgctcatttatgatg  
gcattcatgctggtcattagtgcactttctttttttacggaattaggtgtatataaagaagaaggttaatggattacatctccttattgt  
ttttatcctttgatttctttgacttgggtaagtattcaatgtaagtaatgccttaaagtggaaggacctcattagctcctttctgtctcggg  
cgtaatatcatgaaatattatataataaaggaaatcaattatgaaattgccgcaactacgcatcatgtaatatattcatacgttctcttg  
ctagtaattgcggtcctccggtagctcattcctttctgtgtaataagcaggggattcagaagctctactagttcatgaaccgttatagttcttg  
ttaaaggctcaacagaaaacatttcttcccaatagcaactcgaagcatcatttataactcttaaggctatatgacgggacaaggctgtttc  
gctttgaggatcataagattctcattccatatcaaagccatatctcattcagctcaatcttctcctttctttattgttactatttagcgccccgat  
ggataactaaaggatccatagttactcagccttagctgccttaagccaacgttcttacttgcgcatcccaagcagctgaaataaacaagcccc  
atcttctgtttgtttagaacttacctcaaccaagaaccgacaagatgcaaaactatgcctatactaaaatagcgaaaacgttcaagaattaat  
gtctcttagggtaagattgaggagttagaacaacatcactaacgaagcaacagctgcagtagctgagtgattcaaatcttagggcattttt  
tggatttgcagcgtttcaagacccgaaaacttggagaagcgcagtcagggtcgttttaactcttagacgatttcttcaaattatttagcgata  
attgctctctcgtgtttattgtctccttcaaacccttggcttctttgttattgtagtgggcggtgtaggagcgtatggaattagcaaacgccccaa  
ctaacgaggtgcaaatggatccagggttatagcaagcaagcctgtacatcactttggctgtattttatttctttggacttttcttctcctatt  
caaaccatctttggtagttggagcatctgctgtatgcttcttggccatgggtcctattggaacccctgtgaaatctgctttgaggctgtgag  
caacaagtataaaaaccaagaatgcttatttcttatttcaagaagcttatttctgcttattaggtaccttttggctcgttttcttattac  
ataggctgacttcttttctcctcaaatcaagattagcgggtggtatgcttcttattaccttatgacgggttctgctctcctgaacatcaatgat  
tttggggtgatagcttcatcaacctcctttctttacaagcactaatgcgagtgaaaggattggaacaagcgtcaatttataggctatat  
aggaatgattgtgaaagtgattgagtttcttataattttcatcttctcgtctatacttcttctcctcaacgagacatgaattgagcgtttcatc  
ttcctgttttagtttctacatttacttgttgcctgtagcgttcttgcagtgcatgtatattcgtttgtaatagtttaggtttgtcgagtttt  
atgacttactaaacaataagaaatccacaatttgtttatgtaattatacataggttagattgatattactagttttttattgtatgtttacata  
catctcagcaattcaaggtatgcatgcttattctactcagaatcatctatatcgtataagagaattaactatcataagcaagtcgaaac  
ttcattgacctggctaatacatatagaacttttttaagtaaaaaaacattaaagttttgataatcaacggtaccttgcagcttcttaagatcag  
cgacttacgggctgcagacattaaatcggattgtacaatgtaatcacggcttcttcttaaggttaaaaatccggcttcaagcacaacgttccgaa  
atcagcaccattggtaccatcgtaagcttaacaatagcttctgtagcaagttcacctcgtttgacacgtttcaagatgaatttcaaaattcca  
tacgaccaactcattgggaaggaattcaattttacgatcaagacgaccaggacgaataaagcaggtcaagggtatcaggacgggtggt  
agccataataatttagtttcttaagtaatcgaaacctcattgattgagtaattccatcaacgtacgctgaatctcacgatcagcagaagta  
ccttctgaaaatctccgtccaccaatagcatcaatttcatcattgaaatgacacatggctcatgctcttttagcataaccaaacattcagcaataa  
tacgagcagattcaccgatatacttatctacaataaccctggatacaacctcaagaagtaactcccaagaagctgcaacagcagcagctaac  
aaggttttctgtaccaggaggtccataaagcaaaacacccttaggaggttaataccaacacgtaaaagaggtcagggttctttaggggaag  
ctcaatgacttcccttaactcagaatttcttcaatttaaacaccgacgctgcaaaagacacatgccaggatcttcaacggacatattataaac  
caatgggtctactcccaggaaggatgagcataatcgttaatgtagtcatgtccaaagaacacgaacaccctgaattaacttagattggtcaa  
cattattctacatccaacaacatagcaggaccagaactaaactgtagtagcttgtttcaattatagagcaaaatactattaccagctggac  
gttgttttattcttttctttttttttttttacgaaaccctctacacgcatgacctcctatggttaacctacaaataacccgaagaacagcaacc  
agtacgagcttgaccatcataacatgtgtggtgattctcagaactgaacctagagatctgcagattcacttacctagcctttacaataaagcgt  
ccggatcaagttgttttaagacctcgccgataatttggcctacggactgcaagctcttgatcatcttctgtcttctgtcttcttccaaaatcgc  
gaattccaaaacgaggtctttaaatttgcataaactctcgtatgctgcagcaatgctgccttatttcttaagcaacttcttctccgacattc  
gggtttgtaaaaggaattgtgtttcttctaaggactcttctgtagccttctgcacgctgagtgctgtgatgattgtttatcaacgctgtaa  
gtgtgataaatcgtataaccgactataacccaaaagctctatttaataacgaccttgaataactcgttaaaccacaaatacttctgtttgcata  
agaattgaaaagagatggcaggaaggtaggccttcaattattgctagttacataataattgtacagaaaagtcataaatccttacttaggta  
gaaaagcttctgtaagagaatgtaaaaaccagaatttcaaaaaagaaagcgactatggtattaactaactgaaaaaataaggtccaaact  
aatggaagaacaaaatatcttagatcttaataataacaaaaaaatagaaagacataaaactttaaattataatcaagcaatattg  
gagcagacaagacttatattataatagtcagaatataatgacttgaatcagaatcctgtctgcaataggacagataataaattgatgtaaaa  
tagtggatagcaacattaatcagtcactaaataatgctgtaagcgcattactgagtagctgtgcaaaaatccctcaactaagtcggattctt  
gaagcaaatcaaaaaagtcgaagctgtcctccgatgtgaaaggtcctaaagtgaggcactatcagaatattcgttgttaagaacagctc  
ttgagcttctctcgtatctcgtatcactcttctcacttactgcaaatccgaatggctaaaaaacaactgttcttcaaagcttctcctcaaatca  
gttcatcattatctttgctcatggatgaaggattccagctgcacccctctcattatcaccgcacagctctttatataattcttcaaatgttctgtact  
ttttcttttctcgggacgatactgagaattaacgaggttaaacaggtcaccacaggttgcgtatttgacagcttggcaaacacatggcttctcag

catcttctccactaatccagagaagtctaaaggtccatgcataagtaacgattttagtagacagataaaaactgtccttcgaaaaaacacgttttgg  
gttcaagcatgatctctccaaaaagacaaaaccactatttatgatttcttcaagtttctcttggatattaatgcagagttctcatccacat  
acagattgctcagaaaacatagaaccatttttcttctcgtcttcttctgaaagactgattatcatcttcaaagatgatacatcattgagggt  
aatttggataactcggtatctccaacatacttttctcaaatggtttccaagatactccaattgacgaaccttctgactctttgagtgaggag  
gattttccactcttattactcacaatctttgtaaccctaaaagcttgtgtgaaacagcagacaaaagaagagttctttgctttccatcatcgact  
acatcatcggataacggttcaaagacatggacttacagaagaactttcggactgcaacattatcgataactgagcattttgactattaat  
aaaatgcagatagttcccttggtaaatggccatagtctgagctctccattcaggaattttaggggggtccaagtgcagcaaatattctttctt  
atatcttataaaggacttcagactggataaggacgatagacaatccaaggggggatctaaatataaaggatgcaccgtaatacaaaact  
cagattttttatctttatggggatgaaaggtcttgggctcaagcgaacgatattgtatattatctctgcttcaaaaagagcattatataga  
agaagaggcttgggaccacctgtgggcaaagtcgcatgaggatgtgtcttttaggggttggttaaagacatcgatttatatgtttctgt  
ctaaacattctccttcttcttgaaggagaaaggaaaagaatgatacaacgattgacaaaacctggcttagcacaatgcgttgaattttttaa  
aacttgcatagcaagaactccctcaataaaacatgtagaggaagacaagcggcatcttctggttgcaaaatgtttaccatcgagaagcttg  
cgcgctaaggcctgttcgttcgacgcttatccagcatcttgcacagccgaattgggataacggacagcaaatccgtgatgggcatTTTTG  
ctcaaaaacatattcaagtcagaagcaaaaacgtaatctttagaacatttttaccatctcaaaaataaggtaggaagagcttgggtactc  
aataagaatagaaattcctgaatataaccctatctgactttccacctctgtaacaaggaattatcataactcactgtttataccaacctatata  
gtaatgatgtgaagttcgtgatgagaagaagaagtgaggcttcaattctctgggagagcgtgttgagggtatctctgaggacatactgaga  
cggatcctctatattcggatgttaataattaggataatattgccgtttttgaaccaaaccctgaaaagaaacccaacaaaattcctatggca  
aagtaacaaaaccgtccaagaaaacatgaagaacataaaacgatatcaagcacaactaaagataaaaacatagcttgattatTTTctaag  
cttaaaaacgctttccagcttgcataaattccattgcataaacatgtgaacagcacaataacaaattcgactcgataattcaaatcctattcc  
aacgcttatcttctctaccaacacagcgttgcagaaaagttataaaggataagggaaaccagcaaatTTTTTgaacgttatatgaagcaa  
ttgagcataaatacgggtataagaaaataaattaattgataaataaaacggttgatcagcaataaaaataccccatatacagcaactgaat  
ataaaacatgggtttgcagagaacatccattgtctcagcctcagcaaaaggcttagctgacataataatgcacctactctcattttcctaacg  
agtttacggattacaacacatgatcttaataacataagatttctttaaaggttaaaccagtgTTTTTataagcatagaatatagcaata  
tattgaaagatgaatgcacatgaagctaccgtaaaacttagactaatatgatcatttgttaggtcttgccttagaatggtaatcatcaactaaca  
cctaataaccgtcgttacgtttctgatgactactatcttgtgtaataaccacattcacaactctcatctaatatgtaatacaaacccggaattataa  
aatttacaatagctactacatactcctcaacctagaaaattaactgccttaaaaaacaaaagtagtattttaggtatagaacagaagc  
gaaatcaataaaggcatctactcctcgatctttcagcagcgggtgaagcttctcagccttctcggcacaaccttagctctacggagacgggc  
agccttggaacgggcacggcgagcatcttgttcttggagtaacttagtacggttggctcagccttagcagcttgatgtctcaatcaaagc  
acgcttgtgctgaaggtgttaccttggcagccaagtaaaggctgtgtaagggtcttatcgatcttgcagtttccaggttccaggtacttaccggaag  
gcggcgcaagacacgttgacggcgcatccagacgacagcagaggcatacagcctcagcagtagccttaccgcttaccataaccagtgtagc  
accaagacgcttggcagcatgagcttgcgaatacggaaagcagagtgatcaagtaggttgcggatgagcaaacatccttaaccaactta  
cggatatttgacggctgttagcattgctaattcgcctaagctcgttgggggtccatcaaactttacgcttccgcatctaaaacggacgcagcga  
gacgcttctcgtactgaggttccattgtgttggctcgggtggaagtgaggtaacttcaagaattctcactcaaaactgccttcatatcagca  
gtcacattgtagaccttaccctaaccctggaagaactcgtttagggtgacacgcaaatcaagtaacaatgttaaaacaaagcaagctggctcttgc  
gtgatgaatgaagcaagcatttgccttcttgcataattctatctgataataatgaaaagcaaaaaataatttaggatataattggctgttta  
aaaaaaaattggtggcaatggaattcaatgaactatctgcttcaaaaacttggaccataaacaagaatgttgaattacgtagaagatgttat  
catatcaacatttgaatagaacatataataaaggaggaggaaagcattaaggagaatggaatgtctacagagtgaacgttatccagttca  
ccatattaagaactgaacttttcaaggtatcatcgtaattttttatgaaacaccttcaacaacaaaagatcgaattatgaaagat  
gcaggcgtgggtttatcgacatccaataagcaatgacctagtagtaaaaggcatgggaataataataccaaacgaacgtcgaattgtac  
ttttatataatacaagataaaagacaaaatggattcaaaatgtttatccaacaacaaacaaatgttaggtgggtgagatgaaaggatg  
gaaggtatacacacagacaaaagcgtcattataatccaaaaaaagtctacaacataaccaacaacaaaatccaaaaaggaacgaat  
aggaatagagcatgcaattctctcatcctaaatgagcaggggagaggaggtgactgacaaaaagctttcggtaataataagtagaggtac  
aaaaaaaaggaaagtatacggatagccatcggaacatgaatgataagaatacgaacttttagtcatcaaaaaaccttctcatgaaaagcttc  
cacaatcgactagccttggatccacacgactgacacgctgtcatctgtttccgaaaacccaatccctgttcttgcataatgccattcagc  
aaagatagctcgtttattgtctagataaacatacaaggcaagcgaagggtagatgcaaatggacttcggcaggggtgcaaaagatggaatga  
gggtcgttgaaggcttagaggaggaccttccattcagcagcgaaggacgaggggtgagaccgtttatcgagcacagacatgtcgggacaat  
aatcaggcagggcttcaaaaggaatgttgcacgtccataccattgtattgacctgctccacgttggatttctcccctgtttcaacaggaga  
agctgaagattccgggggtggcaatttgaattgcagtgctcctcggtactgtatggtgaaggtcccgagatgcattcttagacgaagtctccgtg

tctataacagaagagacaatgcgattaccacgacgccaacgaaaccttgacgacgcgcttttgtaattggttttacgtgttcttgcaagccaa  
atcctttctgtgaagccaaagccttggtgctgtttgtatacctcatatacaattcccttcatacaagcgcatgaatgttcttcaacgaagaa  
acatcccgaactcccttgatgaaaactcaatggtttcgtcttaggaggtgaaagaggaggtgtataagaatacaatcattccatttaaattcg  
aattatcctgttctttaagatagcattatatactttttttagcactcaatccaatggccctatactataccctcaatgatgaggttttgat  
cttgctaaagacaccttctgtgggaaacctctttgtaagccctaataatggtaaccctaaaagttcaccaccattcagctagtcaattgagcgtt  
actgtgcaagttgttgcctgttttttttaagtgaacattttatactattcattgctgaaaggttggacgatggtccctaaaatgatggtct  
gtagaacactcactgtagcaggaacctgtcactttcggtttttttttttatgaaagaaaaacaaaaaattctacatatataatttttcca  
taaaccaaagaagaccagaatcctttgccaagggcttttctatgaagagcgcaattgtttatgtaaaaagctgaatgcttgcgttaagaac  
aaccgcaaaggaagactatattgaaagtacacataggaagaaggttttgaagcaaaagacatacttcttatgagttttctacgaattgata  
cttaactactgttggcagtaaaaacctcaaggccccgtaaattttgagcaaatcaattgtttgttctccaaaactcgtcaaaaacacaaat  
aaggaaaaaaattgatttgatcatatggaatccttccaagtagcaaacaccagcaaaagctacaagcactgtacaattgagaattcaaaa  
agcaaacatcgatcctctattgaatggactctttctcatatggacaaaatgttctgggattatttctacacatctattgaaaaccattg  
attcaattcagtatcacatcattcataatattaactttaattacttttctacttttttaattctcgacttctttctactttttcccttgcatagatt  
catatactattttcttttctgatcctccattgtttgtttacaaatggacattgtcactctgtgaccggtaacgtatttaccacgttctttatgctc  
cgagcgtatggaccaatgaaaggctcgttattctcattcttctctttttccctttttctatggttcattcactaattttcttttactttacgctt  
tttctcgtaatcgcttagctacacattccaagacgatatttaattacagaaatggaacatccaacgcaaatgtctgaaaaatttcgatgttt  
tctttttcttctcagcaagcatcaagacaaaggaaaaccacgaatgggggttctttctggggtgacgggcttgttgcatttttttggtagct  
tctttcatttgcggggtttggtgtttgacaagaaaactcttttctgtcctttataacaatttctatatggtagaatttctgtattgaaatgga  
aacggttgcatgtttccctgcctatttctgttaccatcgacaaaactccaattgatttactaattccctctattgttagggtctacagcaataatt  
ggttgcttttgcacaacttcatctgtattatataaactcaattcattctactattacggatttggatcagtgtttttaggctttgtcataagagt  
ttgcatcggttcttttctttataaaaatattggcatttttttcatccttctatttctgttagctttatagtagctgttagcaatgttgatggt  
tcaatgaatgtctgtaaagcattcgcttgacgatcttgggcaacctgttcgcttctcgagctgcttctgtcagtagcttctacacctgaagga  
ccatattgcttgaatgacccaaggacaaaaaggtgaatgttatacaaaatctaaggattctgaaaagagtgatcgaacaaggccacttc  
agtcagtgctcctccgctgatcgtaaaaaccttctggtacccgagggcgaaggtgcggtgactttgtcgaagaagatccatcttctcctccct  
gccgctattctattccagaagaaaaatctttggattggcaatcggttctccaaaatgctcctggtcttgtgaacctggcaacactgttttatg  
aactctgtcttacaattaatgaccatacactcctttggtacattatcttctgccaacattccatgtcctgcccgttaaatgatgtgtctgt  
gtaaaatggagcagcatgttctcgcctttccaacaagggcgcaagcgtgcttctgcatthaagccatcaggcattcagggtatgctaaaa  
gtgattgcaagcatttccgtccttaccgccaagaagacgccaacgaatgttgcgctatttagtagatgcttggcaaaaacttgcctacaaaatt  
caaaaatctgatcaccttagccgagaaaactcctggtccatcgatctttggtggttaccttcgccaagcaaatctttgttctgtttgcaaaaagc  
ctccaacttaccagcattgctagattgtctgtggaagcaaaaaggtgcttccggtgttgattgcttaaacactttgccaagctgaaaat  
aatcaagcaaatcgctatgctgtgaccactgcaagaagttagtagcgaactaaaacctgactgtttatcgcgctcctaactcttaccat  
tcaactcaagcgtttacctcaacggatacaattctacaaaatggtaagcacatttctatcctgagcgtttgatcttggccttcatgtcgga  
cttccacatcctgtcagatgagctgattggggtcctcgtccatgcaggtggaagtactcgaagtggtcattactacttttctgcaagagtagta  
acggtatgtggcttaagttgatgatgaatgtttcaaaccttagcatcgcgctcctgaatcagcaagcctatacttgcaatacagacgatt  
cctggatcttcttccagtaaaaagaaagctagcagatcagtagcactgacccgccaacgggagaaaaagaaaaagaaagaatgta  
tcttttaaatcaacaagaagcatttaattcgattccgttctttttcttctgtaataatattaatcccttttttctaataatgtagtctgtttgtt  
gtctcaacatcaatctttcaatgtattcttcttcatatagcatttagcatcatgagcaagtcttcagtttcaatcgttttagcatcatgatgtgc  
gtataaaaatttaggtactagtaacctgccttacaattaatattcattcatcattttgtaagcttttgcgtccaatattcgggtttgcaaccatt  
ccaatgctcgaataatcaaaaaaaagactaagaaaaaagaataactaattcttttttaacttctactgtaaactcctgctctaacta  
tccattttgtcagttactcggtaactactacgtagagcatctcgaaccagcgacataaccagttgctcaacatcgttttaaggtgtttcagtag  
gtgaggcaaatatatttagtgattgtaagtaatttttagaaatataagactaatcaacagatgcttgcggttttctgcaaatccagattttctt  
cagccggtcaacaacattccggttttctgatcgaattcacagctagatataaccaagcctcactaccaaggtcaattgagaatgagcaggatt  
ttctaaggacaaatgaagcatttctgctggaacgagtggttgcattctcttgaactcgactctataaactggcaattgagagaagaagagc  
agtctgatggctctgatccttcaatgatgattctagagatcagagattcatgcatatgtcgaatggcatcaggaatcatctatacaaccg  
aaagcagatccaatttgccttaggtgaacgacgaatattggaattgctaagagcgatattggcaactgagagaaaaataccaaataaa  
aaatggggcatcttattcgggtgtctcgccttctgtgatgttccactacagtatactactatattggcgaacgaatcctgagctcctccgagacatc  
accatagccactattcaagagcctttccgttgttcaaaaaggatgccgtcgtttgatgttttggctgtcgcagtggtcttttgcctagtcgaat  
ccccagttcctgttttcttttagccgctgcacatttccatgtttgcttttctattttttaaactcctcagaatcaattagaaaactccat

tcaatccagtgttatgcaatagtcggttgattcttcttttattcactatgatttgcttctctatattggcggcattggagccgattgaaacctctt  
ttaatattgtaggcttgcagccgtgaatttctgacattcccaaatagtttaattcataagtttcttagtttcttttacatattgattttat  
gggtccgtctgttctcggtgcttctgcgtggttcttattgtaggtcagctgggtttaccaaaagttcatggatattagcttctgtctatgct  
ttcattttcttggctctgtgttctaaactcgctacaatggtaagcataaaagattcaaccagaaaagctaacatatatagaagttctatt  
tatcgcaatcgctcacaatggtttttatcgaaatacaagaatgaccgcaaccaaaccatttggtttctattttctacgacgtcctctt  
tcaatacgggttgctcggtttcttcttttaaccatctcaactaaaatcccttctcatctttccaacatggatgaggcatacctctcacctggtt  
tattatgtttacttccatttctggttctctatgtggcttctctctacgcttgctacgcatcaatataattcagttccatacatgaatgctcga  
gctaaagcaatagaacaattgaaccgagtaaattacgtcgacgttctattacatttctaaatacacctacttctgctgactatactcgcca  
ttggggttggcataacagcgtggaatttctcggtccactctaatggaattttaccggatatttggcggaaattctgtggttcttggcgtggt  
ttataggagtcattgaaggaggtctgagatgctgtatgtattatgaattccaatgtttgcttactgactattgattaggggtgagcttggta  
tgtactataattgatattccagttgtcaaggcgatcccaatggttctcactgtatgaagcttggcaactttcgaatccaacggatttaatacga  
cagcatttttattctttttgaaaatattttaccagtttcatcacggtgctttacttatgttccatacggcaaagtttagtttcttcttggcc  
gctgaagaaatactttaatcgctattttatagcttactgagagatatttcttaattcttctttgaagtaattgtaattgatcatctat  
agttcattttctatccatgcctttattttctgatgaattctgaaggtataagccgtttaaagaccgaaaacattcagaacctgcacatctgt  
ataatattggtaaaactatttcaagtcattaataagatcagcagacagtcactacgttccaggaatcataaaatttagcaccaaatttta  
agatgaaacaacgtccaacaagaaattatgacttctgctcagcattcgcagctgcactttcttctgttgaaaaaggggtttagtttctgtt  
gacggtttgcttgcagcaagagaatccaaaagatcatgtaaagcaatgacagcacgaacgatgctagaatataaatactcattaactggtcat  
tggagttgatattgaaagcacgctgggcttctgattgcaaaactgttccgaagatacaggtccggagaaaagcttaggtaaaagattaaatc  
cttgaagctcagctaaaattgctggtttagtgaagctgaccgttcaaaccttctgaggtagtcagcaatttctgtcaagcgtgaccaagac  
cttgcagggttagcttctgagtgacacgagtgccgagagtagcaacagagacatcttctgtcagtagtaatttcaacaccaatttct  
ctgcttctcggttcaatgctgaaggaaggtgacaaacttctgctggttttagccatctcttctgatttcatcgatagcaaaataggcatt  
gttggcaatccaacagatttaggcatgacatcaataattcaagtcaggattgggaatgtacttttgagtaattataatctccaagtcagatg  
gacgtaattgaggaccgtgtggtaccaaccgatcagttttcgtggcgtttagtttttaacatttattcactgcactcctaaattgtagcca  
aaaaccatactgacgagttctttctcttcttcttcaatgggatcgcgtaactattggcaactgtgcaactgtccatttttgcctaaaagaatg  
ccaacaactctgcttctgatcttctgacagaacgaatgaagaatctactgcagaagcaagaccaatgggtgaacaatctaatttcatgttac  
tacaacatcttcttcttacttacaacatgctgaggaacaaccgtagttcttctcgaaatcacagaaggcgaaggtggttcttcttactg  
tattataaattcgagttatacttttcaaggtgttggtaaatgaagagtttttgaactggtgcttcttataaagaacagtgccattttac  
gtatgcgaacgtatcggttaatttactgtagtctgtaaaactggagtgcaacatagcagtaggaaattgatatttgaaggtatacaca  
acgaaaagtagtttcttcttaccaaagccttcttcaatcatgacgaacatggccatttctatccaaagtagctcaaatgaaaaattatata  
gaattcagctatagatttcttaaattcgcatcaattacgtggaattttagctgaatggatggtgacgctggacgtgacgaaaagactcgattc  
gcgctcatattctttttattcttttttaattattagatttatttcttcttgaatgcttattgaattcttctaaattgcacgaacacgaaacgc  
ataatgttacttgatgaattgcacaaggtaacagcagtaagaaataaataaacaagaagacgtgaatgggtactgaaaaacaatttca  
aggtggtttgaaatatcaaatcttttcttcttatttatttataataaaaaggagattgaattcattctgattgaaaggacggaat  
agaaacttactgtcgtgacaaacttctggttaattttgattttgattttctatttataactgttttggcaatagtgagggtgaaatccggct  
attttgatttcttggttcaaatcaaaaaaaatttcttaagcgtaccgttattcttttttccaacgatctttaaatacatacaggt  
attactgaacttatttttcccaactgcacacgaatgctgcatctattaatacatattttactcaaaaatggcaccgttcaaggaaaa  
atacagaatctcaattgctcgtgtagttggctctgctcagctggtattctcgagctctcttttccatcccgtggacacaatctcaagcgttga  
tgttaatcatggacgatttctatgaatcagctgaatactgttctttcaaggatgctgtaatgcccttggtaagaagcttggatcttctt  
ccctggttgggtatgccgctgttcaaaagctccaacgtatctacaagtagtggtcaacctattgtaagtttttttctctgcaaatcgt  
ataattttgttctgcgctcagcaatgttcttaacaatttctttaggttaagacttctggctactaactggcaacaaatttgatcaaaactt  
ggaaaaggctccggaagccatcatgcacgcaaccgctgtagtattgtaggtattggtgaaatttcttcttcttggacgtttgaaatca  
agcgtcaaaccaatctgaagcttcaaggacgtggagtttccgattttagctgatgaaaagttcgtttataccgtggatggggtggacag  
ctgctgtaacgctcctggttcttctgcttatttggaggtaatgctttgctaaagagtataatttaagcttaaggactattctatgctacttctg  
caaaacttctcattcaattgctggttcttctgacgtttgattttccgctccttggacgtcatcaagaccgtatccaaaacaagagcttca  
caatctgcttctggttacaatctaaagaacatgttgaagtaggaagggccacttcttctcaagggttctactccaaactttgaccactg  
gcctaaattggttcttctcaccatggcgcaactttgattccttcttgaacagcttttaagtaatccgaaaaatctcatcagcaccaaaa  
aaaaatcttcttcttcttcttcttcttcttcttcttcttcttcttcttcttcttcttcttcttcttcttcttcttcttcttcttcttctt  
aatcgagaaatccatttttttctgaaaaaaatcgttgataatattttactacttaatagatggaacttacatttttctggcaatctataatt

actttatgtttgctactttggttagattatgtttgtttattgtttactctcgtcatcgtgtaaacactattgtttactttccagcca  
tttgccttctgtaaaaagcacaacatatttcttctgtttccttcccatttagcataccttgaatctttgtttctttgtagattgataaaacc  
atgcaaaccattgaacttggaatgccttcaacttcaacgcattctgtttccagcagagtaaatccatcaaaggtaactgcaaacttgatgaca  
gtgcaattgaagaacaagatccttactttacggtgactagaaaacttcatgcaactggccgatgtgtgacgctcagcaaagggagattgaaaac  
caaaagaaggacatccattcgaagcgaatgtattgaagaactaaagcttcttttagggaatacgaaaactcctaccgaaatagaactgtatt  
aaacaactatgcttccgtaagccttctttgccgacgccatctgtacctccgcttctgtttcagataatggctacaggtccaaagtaatgcatc  
ctaactccgtaggctctgggttaggttagtctctattcattcccacggggcttctgctgctttgagtgatgtttctgctcctcaatcttctc  
aaaactgaaatgccaagcaggaagcaactcctctgcttcttctcctgtgaaaggattaagtaagtaactttctgctgcttcatcga  
catctgatacccttgagtcattaaagctatagacaggaagctaaatcaactcctacccttgggattatgtaataacaatcattctgatcttct  
ttggccaatatacaactagatggatctaaatcaaccattgctaacaactcttatcaaaactcatcaagcaggtatgcaaaagtctgtatttccg  
caggcacggatgtatccggtgctgatcaaaactgcgtatctgctgattatggcctaataaacaatgcaagtaggctctgcaaccttaggat  
caaacctgtatctgccttaaaagctccttcaatgaactcctctagaagctcttcttaaccaaaggccatctagctcagctgggaccatctagc  
aatgtatctctgcaaatcaaccgattgtccaaatccccgcaaaatgcatccgttatagaaagctctccgaaaggaacgctgtttacgattgg  
aatataattgtaacaagattatattaagcaatgatcagcaatcctctattttctcaacaaaaactgaagggtgcttctctgagattaagcaat  
caataaaaactgcatattaattcaggctttccattgatgctgaatcgttttgtaatttctaatccagcgttgcttgaacatggaactcctcatc  
aaatccgaattattggatctgctattctggggaatatgtacaaatagctaccgatcctttggatgtcatgctgtcaaaaagcatttgacaatatt  
gacgaagataataatattccatgatggaagaactgtttgtaaccattgatgagacgataatgcatcattatgcttctgctgtttggcaaaagctct  
ttgaaacagcttggttaattatcctgtgaatgttatggaccgtgtaatatagctttgaaaggaaaatggcatgaagtagcattaggagaaaatg  
gaagcttggctgtcaaaaactgtttgaaaattgtttgaaaaggataagcacgattgcttgaagaagtatccttcatctggacttgattgacg  
gggacaatggggttaattgggtaattcaacacatgggtgaaaatccaaggcagatgtttacgacgcgtagctgcttctctacgagctac  
ggagtatagtgatcaatgcttcaaaagtaatggaaaaggcaataaatttggccaaggattttatttctgtatctaaaacaatcac  
gaatgctagaatggaccgtacaaggcaaccattaattgatattgcatcagaccaatattggcaattatcaacaacaataattcagcttctca  
gcccagtgatcgtcagctggttaccatataaaaaagcatatggatctcttccggaagcaagtagcaggtcaaaaggttgccttctagctga  
gaagtggaaaaccagaatccgagcttggtttcaaacgcttctgattgagctcctaattctgaaatataaatatcgagataatgtttctaa  
attcttttacattctaccatataaagcagtagattatggctttctattgtatataatcttctggttacaggactattataaagcatagaaaag  
agaaaatagaacaaaccataccgctattatgctgtaggagcagataaaacagcagagaaaagaaacgagcgttcatgaattcattatttagttt  
cccagcattggcagccaaaacattcatgtaattgttcatgagcaaaaatcaccaatcaatgcaaaaatgctgcttacaggaaggacactcaa  
atcgcattgaagatgccattgttctgattagacatttctgaagctttaggaaatggaacctggcaagcaaaaatgatgaaagtaggtttg  
cagaccaaggtaagtctatccaattttagaggaaataatgatgataggatctagcaagatgagtgataaaaactaaaactaattacaactg  
ggacattctatgggtaattgtcaaaactttgctttgcaacgaggacaatgaaagccgcccggagggtaatgagtgacaggtacataaactgg  
ggattgctcaactaccttgaaggaaacccatcattactaatgaggagtcagcggcttgaagaatccgttgcaggggggattgtgctctcaa  
gagtaattcatgaaaatgttctcacttaaaacaacaccatacgcattcgtagaagcactattagttcagatcgaatctcagcgaatagcaac  
ctcagcagcaagaccaacaatccgaacacggattgatcagcaacaagggcgtcaattgttcgaaaatatacaccaggatcgaagaaaagat  
cgaacaaaaataaataacactctctcgtcccagagaagcaatgtgagacaaggaagctctggccatctcaaagcattttgaaggaaaag  
ttccattacaatcggaagtgactttttttgaaatgtgagattgaggattgcatgcaaatcagatatacgttgagcaataaccgtctttcacacc  
aattattgacagctgggaaataggattctgctcaaaatactcctgacaaaactcaactgcatatttaattgtagttcaaacctttatgatgaaaa  
tctctttctcattgaggagcttaagtctaaaacaaaacatgtgacgaatgattcccctcgtaaaggtgtgtgtcacgaagtaataaacg  
agaggaggttaatatgaaatcttctgaaactaccgtttcttctcctgcaatataatcctgcaatgacaccaatcaactccttctgcatc  
ctcctgaacaatccatgagcgtgatactccttcccagtgatccttattgtcatcatgtttgacactttattgctcacccttccattttgct  
gttcatcctcgtttcagactgtcagaatcataattcttttcttactctcagagaaaacctgatataagcatcaacttttagcaaaaagatc  
aataacgttccaaacgaacaaagattgaaatttaagctctagtaattcagtttctatgaatattctaaacttctattttgaagtctattcaatc  
aggggaaaaaaaggactggagcacagactcagttccttatgtttctacaataaaacttttcaataatcaatttttgtttctggtcccgcaga  
gggtttgaacaaacagcctgcattttaccttgacattgagacataggacgaagatcgttaacacatcgtaccaatgcaatcttactagtagc  
aaacaaatagttctcttatataaattgagaagccatgggtgattcagtgattattcttaataaacaataatagctgaggtgatgaaaat  
caaagcaattacttaacaagccttctattttactctgttcatagagttcagtttagtttaacaaaatccattgaaatattcccaaacatagta  
atttttccgtatagatcttctacacttcaatcactgtctgaatccaattgatgctggcaagattcattgtcttcatcagcaaggccattgct  
attagaagcattatcctcagaagtgattgttacttctcatgctgtagcactcgtactccggtactttttgtcaacagtggtggaacgatgag  
agacgggtgaatcatttacttaacaatccatcatctcagaaaaggcttgtttctgagtggaatgcttctgctggttattatcacaggttttc

tccaacagtgttagcttgccggtgactgatgaatctactctttattatcagtaatcgcatattatagtttgttagcttctgcattttgatcagatgag  
acagtctcctccatgggttgattcattatagacattctgtttgtttcgtttccttttctcattattctcaaacggccgactcaatatcaattga  
ttctttataagtctcattaacggctctttcagaattcagatgtgccgagtagccttgataagaagactgctctttgtctctaaaagatcttgggtccc  
taaatcacctttctgccttcatcattccaccaacaatgttgggaagcgaagctgtagaacccagtggtgtaaacctggagaagtctgagaat  
agcagatataggctcgaatcgggactcaaacgctttctcttcatctatactggagccgttctgaagaggtgaaatctggggtgcaataa  
cacatcaaaagtctttatgtactgtcctgatgagaagaacaattggcgtatgcatgattaatcctaagggacctgtaagaactgtaaagcatg  
tggtaaaattattgcttgcaatcaccaggtgctagaatggacgcaattaacaaatcggttaaagagtaaggacatccgggtgttctccgtgag  
ggccaactggatgacgatacgatcaattttagacctaagcattctaggtaggctgatggtatTTTTAAACAGAActcaaaaGAAAAGCAAT  
ggcttagacatttatcattcatagaaagaccagaagagactgacgagatcaaaagaatcacctgtttggctgcccgtaatgttttgcgtttcttaga  
agcgcgcatttggcagcagtaatcaacagcttcattggaagcagattctgggactcgaAAATCCGTTCTAAGACCAAGTTACAATTTT  
gtactttggaagaggaatattgcatgcatcttctcaaaattccagaaagaagtgaagagacgtgcaaaaaacgcatcatgctgcgttccg  
aaagcagacaatcatttatagaatctaaatgggtgataagaccagcataactgagctagggcaaacagcaagcaatTTTCGGTCAACTCATT  
cgcaagcgtatgcaagtgtggtaaaacctgaataacaatgcttgacggaactttcaattgtagatttctactgaggaagatagctggacactgt  
atatacgtcgaataaggcttaataagtacgaattggtatagaaccagcttttccgtttctgtagataaaaaggacatgagatcaaatgcaaat  
ttctacatctttgaaagccatctgataagattcctcataatggcctttaatcttggaaaacttaattcctcatcttgcagcatccgtatacgtttg  
ttcctctataaccaaatggaaaaggaaattcaatgcgacgtggtactctgtattgtacttatacattccttttccaaccgtccgaaagatttcttt  
tccagacatcggtagcaaacaggcatacaaacagcagccttcttttgggggtgaatcgacgatttctgctcttctaacttgaacacaaag  
attctttacagaggcgtaaaaaggacggaatgtagggcgctgatgaagtaaaattgtagaaacatgcaaaaacagtttccaagcattacca  
gattcgttactcgaagacaagcgttataaatgaagatagattaggagttacaagctcccagtgattcctggcttaccgccaagaagtgaa  
gatcctagagacagtactgattgcactttcaaaagtttagggagttcaggtcgatttaacaactgaatcaacaactgaccacgtagccatg  
ttcaatgagacaatccaactttgagacaccgtgcaatctataaaataatggcagaccagcgaactcgaagctttgttatgcaacatacag  
taagactagtgcaccaatTTTACGAACATAAGAGCATTTCAGTTGAACCAAGCTTTTAATACATTTTGCTTCAAAAGGATATCGGCAATGAG  
gggtatctgtaatggtaaagtttttctgttgggaaactggttgacaaccaagattttaccaagaaagcgtatcctccctcaaaaagatccgtcatt  
gagttttgcatagagctctgtaatgataagtatacactgctttctccttttctatgccctttcagagttcgaAAAGTtaggaggtgtaagt  
gtagaggtgtacataaataagagtgaagcgttgaattatgaactatagaagagagaaatgtgagattactgattaaatggaggataatata  
tgaatgatagtgaatTTTATACAAATACTAACGTGAAACTAAGGAAAACAGGTTGTACGCATACTTCAAATACATTATTCGAATTAATC  
cgaaattctactcttttcttaactcttctaaaagcgaAAAGCATTGAAAAGTTTAAATGAAGGACTCTAACAAGAAAAGAGTAGGTAT  
TTGAGGGTAAATAACATGAAACACGATGGCAGATGCCAGCATATTTCTCTAGATACGAACGATGGTCTTTTTATGATGTATAAAGAC  
AGAGGGGTAATAGTTTGTTCATAACGGGTAAGGTGAACATCGACAAGTCTTTCTCCTGATCATTTTCCATGATAGGCAAAAAGGGACTTT  
CTTATAACTCTGAAAGGTGCATCTATTTCTAACTGCCTGTATTGTTTCAGAAAGCTTCACTTCACTGATGATCTTGAACCAACTTTCA  
CCTGAGAATGCTTAATCAACTGACTGCCAAGAAAATTGACTAAGGTCCTTGTCCCTGATATTTCTTCTACTCAAACATCTGAGCAAGCATT  
TCAAACCTGTCGATATCTTAACAACCTTGTCTCAGAAGTCGAGGCATGCTCATACTCAAAAATAGTTCTCGAATTTCTGGGCATTATCGCAA  
GTCCAATGGCAACATTTCTGGGTAATTTATTATGGCTTCAATTTCTAGACGATGCTTCTTCTTAGACACATTTTATGGGGTGAATATCACCG  
ACAATAGACTCAGCTAAATCATGGACGATGGCAATCTTAACACAACGATCTTATTGATCTCGGATCATTGCAAGTAGTGTAGGACGCCATA  
CGGTACATGTGGTCAGCAATGGATTCAGGAGCTCAATACCATGGTATAGCAACCGGTTCTGGAGTAGTTTTAATTTAGAAATGTTTCTAAGA  
AAGGAACGATTGATTGAGAAACACTCATGTTATATAGAAATGGGCAACGAAAAATTTCAAATAAGAAATCAAGCAAGTGAATAAGCAG  
CCAAAAGACTTGTCTTAAAGAAAAAACAACCAAAAAACTAATAAGCAAAGGATTAATGAATCAAAGCCCCTTCCGAAAAATTGAA  
ACCCCAACGAGTATATCGTAGAAACGGTGTGGTGTCTTGGCAAAATGATATTTAATCTTGTGTTGATGCTGATACATTTCTGAATGAATGT  
CAATCAGTTTTATCAATCTTTGACTGAAAAGAAAACCTCAATGAACAACCGTTAATAGCTAGAGGCCAAATGTAGTCATTAGATTTATCGG  
TTCGTTATCATTCAATCAGCCGAGTGAAGGAGTTAATCGGAAATAGTCTGGCATTAAATGACAAAAGGAGTACGAAAATTTAGTAATCAG  
CAGCGTATACAGCTCAATTAATGATGACCTCGAACGGCTTCTTGGGACTTCTGTTGGAAGGAAAGCTCCTTATAACATTTACCCAGAATT  
CTTAAACAGATCTACTCTTCACTTCAAGAAATCTGGTCTTAGAGCCAAGCACAACTGTTGATACATTTGACTGATAATTTGATCGGTAC  
AGGATTTTTCCCTGAAAGACGTTACTACAGGGTCCATAGTACTATAATCACTGTTCTTTCAAAGAAGTCCGCGAGGTTGTTGCGACAAGTA  
TTTATGATGGCGATTCTTCGATGGGTATTGCCAGGCAACTCACGTAATATCCGGTTGAGACTATTTACCCTGTTGAACAAGGACTGATCCT  
ACGCAAAAAGCCGAATCGGTAGGCTCGATTTCTTCTTCTAAAGCGGCATACATCAAGGCTTATGATTATAGGGTTTCAACAAGAAAAGA  
GCCATATTTCTGGAAATCCCTCTGTTCTGATGTTAAAAGAAAACCTGTAATAGGGTGAATTTTGTAAAATCGGTGAGTGTTCAGGGT  
CCCTAATCTTGACCTACGAGACAAGTAGGTCAGGAAAGAAGCGCGCAATGAGGCCATAGAAGATACAAGGTGAGTATTCAAATTTGGGT  
GTATACGAGTCAAACAAGGCAAAATGTCTAAGAGGCATTTTCACTTTTTCAAGGGGGTGTCCAGTCCAGTCCGATACCTCTAC

aacattagctccattctggcttagatcttctcgaagccctttaagtaatcttctgacccgcaatatacttgccaaccgtggacctagaagag  
ttcctgctatcccacttataccgatccaagctctaagacacaaacgtccgatgaaagtgttagcaaaccaagggtgtttatcaaccaggga  
caacgtttatagatgtttccgactacagaaccagtagaaccaggaggttggtgcaacgattgacggtttgttaattgaagctgtactcatc  
aagttctatattcactctgtccatttagagtagcaaacattcctaaatctgcatcttcttcttaggacagcgaataaaaacttgcaatcttctcaact  
tctcaattggggcatacaagtttaaaggaacctccatcttcttttgcggggatacgaacttacagaagtagttaatttaataaagatttagca  
aaataagatgttttgttaacggaaccgatcttagtagacttgcaaaatgctgctgactcgttccaatcttaaacgaaattcttctaagctaa  
aattatcgaatcacaataatgataaaagaaataatggcgctttaataatgctttgtatggattagagggtggaagtagtgcgaacttgcaaatat  
gtctaatactatcatcttctgctggtcgagaacgcaccactacacaaacctcggggtctctacataaaatcggattttctaaaaaatgagcctt  
tccagtagactttcgagcttcaattgaatggaaatgatgattgaaacggcgatgggtcgtatgcaagtccaattgaaaaaccaagtag  
gatttctataaatatgattaggtaaaatgggggctaatactgtgcaatgtagattctttggaaatttaggtccatctagttcgcaatcgtccagt  
acaattgctgactatgctgcaaggggtgcttctcctctactcacaatgctaattccatactgtacaccgaaataatggattgtagatgt  
aaacagtataaaaaaagccttttaggggtcattactgggaagtcgggccccaaactcacctcttttactgataccacggaagcaaaaggtgcaa  
aaatatccgagaatctggattccaccgctcccgagatgagctgcaaatcatattccctgaatcttctgcccattatcgtatggaagatacc  
gatttgtgcatgttacaactgggtgctgattatctgccttaggctttagctgacactgtagagtaagtccttagtaatggtttagcttcaagtg  
ttctgactcttttcttagagaggatcggttaatttctactaacatgcttctcctgggctgagcttaacacaaaaaacagtttccgaacctcc  
attcaagctccagaatgctacaaaagcgttaatctcccctcagctctctaaaattattcaatttccgatgaaacttgtttacatctttacac  
aaaacctcaagacatattgcaagaggcgtgctcaagaactgtatgtacaattgttacaaccattgtctaactcttagtacaatcgcaattg  
gcgcttataaggaacttagggttggttaacaccagctccctggtagcaaacacttcaacgtaccccccaattcgaactggttattatgatt  
ttgatcctgttattggaagagaattaggaagacttttgcctttagtctgctgcttgaagatcgttctcaaatgctattccaacatgaagaga  
aaagtgaaggtcgtttgccttcgagcagcttcaatgtctgtcaaaaaggatttattgggttggttaacattatgatggatgattagtttaata  
tcgcatccgaagtattcatgaataaaaaattttagtgtttatacagagtattagaatttaagcctcaacgatacatcaacaatgattatgtt  
attctgtatcttaattcttcttagcagaacaatgaatcgttattatctatctaattttgtaaaaaaattaccacatgacatattttataac  
caaaacaaattcatataacctcatcgacattaaacatccacagaaaagccatcacgactttccagctattaactcaaagtgtagattttgtttc  
tgactggttactttgagcttttagaggactgtcctaccatcttcatggtgcaaacgacggaacgcccgttttaggaagcctcactgagccgtc  
cgattagaatcaccagatgaagtgtcgaagatttatctttagttggtgaatcagaagatgcagaggatgactcctcggtgaaaggggggag  
tagttctacgtgctgtagtatcattaagagaatcagctagctgttccaacaagcttgcctgtagggtgaaagtccttggaaacgctgacctcaa  
atcgactgaaaagttccataacgagcagtagccgaaacgttgcaatacctttaccagtcaggtaatgcgatcaccgaaactgtaccaggag  
gtacacgaaggtccattcaccagccaaagtaggaatgcgaattgtgcctccaaagcagcggtatgtaggggacctggctgtatataagac  
attgtttcctggcgctgaaaattgatgcttgcgtacagaatagtgcatagagatctccaggacgggatttagcatctggggcagccttggc  
ggtagcagcatcttccagcactacaactcgtataacagtactgtcatcaatgccagcaggaatccaatgaaatagcttacgttcacggac  
agcgcagagccgctgcaagaacgacaagcagatgaagaagggataatggtaccacttccaccacaaacatcacaagtggtgcatgtgcat  
ggagggtgggatgaaatgaagacggtgaccgcttccctacaggcaaagcaggtactgcatgggcccagttgaaagaccggaacctgaca  
actagaacaggtgaaagagactaagtagatgacatccttctgacaccatttacagcttccatgaagtcgatgtaagacttactctgcatctca  
ccaactatacctcaaaagggtggcagcagcggcctgcttctcctcagtaaaagacgaaaataagcttctgaaataaaaccagggaagc  
cagacccgaaagctgattcaaacctttgaaatcctcaaaatcattacgtgaaattcgcatttttgaatgcaccagagccatacgtatcaa  
aagccttttcttctggatcttgaaaagctcataagcttgccttaataatctacaaacttttctgggcttcttctgggttgcacccgatgat  
tttttgcactttagtaggacagacttaactctcgcggagaagcagcttgggaacgcttagtcttgaaggatccgtcatttcacgagcgac  
attggaagcatgaaagaaacgctgaaaacgctggggtcttgggtcattctcattctgtaaaagatggctagccttggaaattgagagcatgagaaa  
caaaagcagctcgaattggtgataagagatattttgcatgcttctgatgcatgagcaggaatgctcgggaagtaagagaatgcaaagcaga  
aagattgaccgtactactaaaagggatcattctgaagaagaaaataacgttcgagcttttttagatcgtgatgcagaaagttgtatttgatt  
aaatctcgaatcaagcaattgagacggactttaaaggcacaatcgagattataaataatacaaaaagccgaaagaatccaacaatctgactt  
tctcctaaaactctgataaggtgaataaagccaaggggtatgagaatcaccaaatcaaaaaaacttcaatgacaatttaaaactaa  
tattagttcaaaccttgacaggaaaaattcaaaataactacttttgaagaagaagaggatggttaaggaaaaacggattgcatggaatat  
gcagctaagaaagcgggtgtagaagtaacagaactcaccagagcccaacccaagaagaagcaaaaagccacaaaacgaaaaataaatat  
agttataaggataaataaatttcttactcttcaaaaataacattagatttactgaattaacgctaattggactagaccggtcttctcaat  
tgattgacattcaagcccaaatgcaaacctgagcaacttgcaggatgtgagtgtaataactgttgcgcttttactgattcgtatggatttttctg  
cagacaaatcttctcacaaaatgttcgtaaccttgggtcatcagaatccgccatccagtaaacagtgacaagtgaaatgataaaacagttt  
ttcctaattagtagtctgttccatcgcttacgatttgcagaagactggcagtcgcatgctaccatcgaatcgatccttgcgaaaatttacct

ctacctccgcgaggatccgctttgtactactcgttccctctgtcacctggatcagattgagtactatacctcagccgctgacagtgcaaatcgtaa  
ccaagttgccagactgaggaaggtcgaaatgttcaagggatgcatcaacatcaggtgcctctaaaagccttattgataagatggctttcttc  
tcggctaaatgactcagatagtccacttctgtcttcatcaataatgtagctgttctgttcaccgtcaaagattccaattcaaagaagaaa  
gggaagagctttccgtcggcgcaaagaagaaatgataatagctctcgttaaaccgaatggagaagaaatgatgtagataatgattcttaaat  
gattgtttaaagaagaaaactattagttgtttcattatttgaaacggctgatgaacacggctattcctttccatctgatattgaggagcttcta  
aacgttacgaagggagccttctctttccctttttttgttggcgcatgtcttctgttaatttctgtatttaatactagctgacaaaataagcat  
tctgatcaattcaatgatcttgttggagctacgcggtttatgaaagtttctcaaaaatgactataattttattttgcttaagttatca  
tgtctatataatactattttttttttattgtacgataattttactaacgcacggtttaccgccatacttctcaccagtggttggactaggaat  
gacgaaaatgactaaattactatacaatcgtttgttctgaaaagctatcttactcaagatgtctgaaaaagcacaatagtggttcggaaa  
atgatactctgtgggtaagtaagctgttctgaaaatttttggagcgcaatctgctgaattaaattatgctttgagagaaagcttggtgattat  
gattaaggccttttactggttcatatattcttttgaacaatattgttaaagagaaagcttgaagggttaattccagcaatcagacgaacgtg  
cattgtgtataacatcaaaggaaacaaactcaacgatgtctttcattatgaaaagtttttaactgtattggaacagaaatagtttctatag  
aaattggtatattagaccgtcgtttccaatactttcctatattgtgtcctagcgtataaacaatagcgggttacataataaattcttacataa  
ccgtatataaccagggttcatgatttttatcgttccaattctatactcaaaattgatgactgagaaataagtaatactttgttattctgtgatt  
ttagattcgttatttaagtgaatcattatctaactgagaaggtttgtggtattttgaaatccgcaagttcgttgacctaaaaagaaagcca  
ccgttttagcattgttgaccattttcttttctcgtattgaacgttaaacgttctgtatagggtagcttgaagcttctgactattgtgtctttgct  
tgaattgaccgttattgtttgttacgttcaggggaagttcgttagcttatcgtctgattggcaacaatcagtttttcttttagattcaagttata  
acatagctctcctctttgtaggctctagaaagaagattttgagccttctggattgtgaaacaaaattggaaattcatgggacaagcaaat  
ctcgtccgcaactgccagagaatcatgaccattactcaaccagaaattacaatttcttgcataagattcaaatcattttgaaacggctacgtttcacg  
agatgacacctctcgttaagcaaccaaaccggctctactgggaaccaaggctctccacaattaccagctcctcatgacttcaagttatcaatt  
ttagaacaaagatcattcatacagatggctcgtctgttctgacgagcctgtcaaatcctcctcagcagataccgagaaacagtattctata  
gggaattcatcttaactccgcaaaatacagaatcaagtaggctgacctttacgcattatgccttcaaggccgctgacaattctataaaccag  
aggttggtacaggcagtgatcccaattacattgtccagcccttcaataagaatgatcataatcacgttataacttcccctttcatgaattca  
atggatccaattcatcattttgacactgctaatgaaaccgcgagtgatgaagcgacttccctacatccgatactcgttctgtacatgatca  
ttcacaagcttctgctcaaaatttcttctcaacaataatacacacaatcaacgttccacaagtcgatgccacttattgatcatttacgacaatatt  
gacacaggatcaatcaacaccaaccgcaccgcttccgtttcttctgacgagctcctcaaatgttgggtgatcgtctcattcctctgttt  
cttcacgttccgaacctgaaatgaattcaacgtgaacatggataaccgtgcaaatcgggtttgcctcctgaaactggctcggcattcaaggatc  
caatagcgagaatgctaccagatgcttagtagattactgtcggcagccgcttgaactgcagcctcattatgaacaacgaagctcatggac  
ctgatacaaacgctcattctggtgggagacagctccacagttcgtatcgtgatggatcatttgaacacttctcgtatgcttctgtaattgtaata  
accaatgcttgcaaaattctaccaattctcggagagatgacgacaaacaggaatcctgaaggagacaatccagaggtgagatttgagaa  
tgttccggttccatcttctcgtcagtaacgggtccgaacaatgacaaaatgtgcaaggtaatgagcaaccggacttcccttctgactgtgct  
gattgtttgtatgcgtaatatcactgacagttctgaggatctacgaaaacatgtctcaagataatcaaagttatcatgaggaatttcgagataat  
atttccattaacgatattactgaacgaatggccaatcactaacttcttaacgaagctatagcctcaagaagttacctgtggatcattctcga  
atataccaacacattcgatcattatagctcagcgtcagcgagaagtgaggcttcttactggatcacctcgcattcattatgtatggccttcttta  
catcagcaagttctccttctctgagtttaggggtcacaatgtgctcagaagagcaaacgagcagctcagttcagattttgacacagtacaga  
ctcgggaccaatctgatcatcatcaatcactcagtagcggctcggagcagactccatcattacatattcggcgaagtcattattggttctggtga  
tgatgccgagaatagtgacattgataggttagagaaaaccagggtggttaagccataacagtgagaagcgttgggtttggaaggtcgaa  
acgtcgacgaatcagcttcaagattcatttcttggataataaccgacataacacgtctagagggttgggtcagcggatgaaggaaataat  
atgggtgcagaacgtgctggggtgaagaaacgtccaatgtaattcaaacggcgccatggcgactggcttattacgtttttggaggattgttt  
ccagagtaccatccgatattaactacagtaagcttgtttctgacaatcctacatataggatttgggttggcattgacaagttatctgggtcctgcaa  
gaagcctgttgaaccgaggatttaaatcgtgcaggtgggctatttctgtatctggaaaatgacaatattgtctcaataatacgtgtctgatt  
gcctggaaccattgaacggaatgtattatgcagacgactgaaaggttgaacattttatcataaagattgcatagaccagtggttactacag  
gcaacaattcgtgtccttattgtctcaggtgtaaaaaccagcaatgaggggcaaatcaaaatataccggacgttcttttatttaactatt  
gcttagaatgttattttcattgattatcatgttgatagttctattacacttattatacttaatttttttttttttttttttttttttttttttt  
cgttttttctattacttaagggcgtcgcattcgtgatagattattcaggtcatgattataagcgaatgtaattgattggctatctgaacataga  
catagttttgttgaacacacatctttatgtactgtgtcagtataaggtgctaaaagagcttaggaagcattttctggacataaagttgtag  
aagtgattgtctcataccatcatatggttgggtcctcctgacttattcgtaaaagatgcttctgatcactattacattgctatttttttagcta  
tagaccggcaattatgaaactatacaatttctgcaagttacttctgagacatgagatggctgacttctggatcatgaattctatactctttttc



aatttccttgcttccattggcttgaacacatgtgggctttatcattccactcaaaacatattgtatatactgtactcatatccatcgtaatgtca  
gtctgtgatgtacagaatagagaacataaaggcatttcgtaccatcctctgtttacttttttcataatctacttctgttaaatattttaatgc  
ggataatcgttttcacctatagttactcctatgatgcaagcggcacaaaaggtttgattaaatggatgggtgtataatgtgtgaatttagaaatg  
aatcaaccgggaaaaaaagtaatgcataatggttggggcactgtaccactataattatagaaactctgtttcacagaaacatcaagataaaa  
ataaagacaaactggatgatgttttgatcgaaaaagttagatagatgaataaagctattacttatgacgatcatagggtacaacatagtagac  
attgtaatttcgatttcaatcattaggctctgttttcgagaacggctcattagccctcaaagtgccgctcagggtgaaaacgggaaaatcgttt  
aacggggagttgctttcttaggaaccgacgcggaagagaatgacggtttcctcctccggtatgtgaaaagaggactaccagggttttagggct  
gcgaacagagggtgaggtttgtgtccaaaacgcatcgattggctgtttggagaataatactcgacagcagcactcactggaccataactag  
tgtttgtagcaacgtcttttcacgacggatagtcgaggctcaacaaaactttgtcatattcatagaaaactgctgatgaagacaatccctgtcc  
ttcatcatatctttgaacctctagcaatgaaaaaagtgaagagaaaatataacgcttaaaagaataatcttaggagatagaatgtaaatcca  
tagaatcaatagatggataggagaaaatagacaggaaaagtaagagagaatacgttaggagaccaaagcactaattcaaaactctttttca  
ttttcattggttctgaatgagcaggcgcacccctgggtgtgtttgaacattcttatcagattgagggtgttctatgtcttttttgaaagag  
aagcagctgaataatattgatgatactgaaggccacaagacataataaaaagaatgaaagaaatccttaaccaagaactcgttgctttggctg  
atctggtagctataaacagttgactacgatttaacgcgtcttgggtttccagggtatgcaaaaataaaaatgaatagatattagacaccagact  
taaaggaatggaccactctccgataccttaccattccactatcaaagcttcagagatggaaatataaaagtcaatagggaaattcagga  
ttctagatttagagacgagcgaacttaacttggcattttctcagatattgtgaaagaaagacagttgaattgtcctcaactttctcttcggtt  
aacacaaataaataaatttaaggaatattgatggatgatttaggatcgacacaaactcttttctaaaacagtttcaatcaataaaagatg  
gcctatttccactttcaccttaacaagccacaggattaaagggtaagaataagagctcatttactgttatgtttctactgaattccttcgttgctc  
aactttgtcaagtcaaaaaggtaaatcatgcaaagttgtctaactgtaaaaactgggtattgtgtgttcttactacaacacacaccagta  
cttcacatgaagccttttattctcttagtagtcttaaaaataaaaagaattgtacaaatactgtttcggttagaaattgactatctcaagctt  
cttaggatcgcgactgtctgacattgaattctcttaagtgtttttgtcgaacgcttttagtgatattttttggattcttttaagtagcaaat  
aaagttactctttatttattgcatataaaaaaatcgacagactgaaacgctttttgggtctgtcctttcacgttttaagttgcttacgatttaa  
cgattgtctgttctgtattttgcgtttcatttattctattcatggtttttggatacaaaaactatctgtttgtttatgaggttacttggatagctgaa  
accagggttaagataatcaaatcgcttttttagtgattatgcagaacgaagcaatctcgatagataaataaataaggtccattatgtccggtaca  
agaagtactcgaattagaaaactcactaaaaagagaattggaggaatcacagaatggcaatagcceaaggctcctgaaatgaaattgga  
tctcggcaaaactagagccttccagaagacagaatcaagcgcataatgaaggctgatcaatctacctctgatgaagatgaagaaaaaagaagt  
taacaaaacttgaggaagaggaagcaaaaggaaaacgagaatgcttttagtttctatcaacgaatgattcttctcatcaggtgaaagaagcaat  
aaaaactcaccgaaaattcagaccaagaagatgaatcggatgaggactctgatatagggagcaagtcgatctcaagccgaaccgtgatgaa  
aaaaaggatgaagagaaggatgtccacattagtgctcaagtgaactccgtcttataaaacgaacaagaagatcatctggagcagttgaa  
aaggcgcgctttttctattcatgtcatgcacatggttctttttaccatggatgtcgtcgcaaccagtgagggtgcccagcagagcttttggaa  
atgtttacttgataaaatctcagaggaacgtcctcagtagtagaagattggattaaaagtgaacgaacacatgatgatctgttgagactaataa  
acggactgcggtcttgggtggcagaagaagtttagcataaccaagcatgggctaagaaagctgggttaccgtgattcaagcacgggttgaactt  
ggttcgaacctgagattatcgaaaaatgaaaaggatttattgaaaaatcctttcattcgaaaggaagccgagattatctgctcaaggatttactg  
ctttatgtcgatccttcagccttaacgtccgtttaatattttcccttcagccttaacttactccacggctgcttatgataactgggtcctcatgttctc  
cctgatgaggctacaagctctattgatggagacctcgttatctatattttggacagaagtgatgacaatgatcaaaagcgttgagataagcgtg  
gatccgtgttttaaacggagtgtatacaaatgacatgcttgggttagcccaaaaggagcttacgctgagcttaagcacctgcgtatgggaatt  
gtaattgcgtatgaaaatgattttatgctaaggatgtgactttacgctatacggatgtgtcatctaatcgttgcaaaaaatagacaatcttattc  
accggagaaaaaggacgataacgtgagaatttttctcagtttaaaaaaagaaaaaaatgaacaagatttgattgaagatcgtgaactc  
gagcaaaaagtccagtgccgagctaaagagatcgcgtattataaaaatcatcggactttatattgaagcggcatctaaacgtgaagaag  
ctctctggatgatgcaaagcctgttgacagggtgtctttgggtcgaagaagaatcctattcaagaagaggtttaccgccaagaggtgttttgac  
atgcaagacacctgaaaatttcataaggaaggcgtgtaataaggcctggagaacagcctcgaagatggtaaaagcaagagcagtaactat  
cacaagaaagcagagcatgagtctaaagtcataagtcgaaggagccagtcagcaaggattgtattctcggatcagactgaattatacattc  
cacctccaataagagatggaaagattccgaagaatggttatggaaacatcgactgtttgttaaaagcatgatccctcaaggagccgtacatctc  
ccgttcgcggaattgcaaagattgcaagaagctgaatgttgattacgctgaagcggtaactgggtttgagttccgaaagcatcgagccattcct  
attacaacaggtattgttccagaggaattgtcgcgaagtagtgacgaatctcgcgtgtaccagagggaaactgggtgaaaagcagctgtg  
aaagaacgaaaaactgctattggattgtggaagcgtatgatcaatggactacgcattcgaacgaatcactgaagattatggctagatcctata  
acaaaaattcctacgactgataaagtacttaattctgttcaactagtataattataaaactattgaattgactggattccttcaacctga  
ctaaaaataataaccgctctatgcaaagttcaaaagtgccgttgaatataacactttttcaaaaagtttaagtgaaaggggaaatgagtcatt

gctaaatccggaattatgtgaaactatgtcaataaagtcgaattagaatgtaattacgagtgtaaatgttgaagggtaggcaggttggc  
tggggtcgtcaagtttaatatgatacaagctgctgttaccagttacactaattaccaaacacaataacgttttagcagacagagacctttttctaa  
tcaataatctagaattaccttagttaagtcagggttatcgaatgcgcatgcaattgatcaatagctctttatgaggacgagaggaaaaactgaa  
agaaatcaggtagacgtaataacgaatagatatttgaacagcttcgcatgcaaatctactagtagcaatagatcaaga  
atgagcgatactgctgaactcgcggggtttccagaattgggaacacggaggatcaagaagctatattatcagatgagcttcagcattcagag  
ctatgatagttcaaaaatctcatcgggatgaattagatgatttttagacttgataacgataaccaccgacgatgctgaagatacagaggacac  
aggcccgatatgctttccatctcaagcattccagcgggagtagcaaggactgaattcgtttatataccaattaccgacggcaacgtacc  
ttggtggagggaagaagcagaaagtgaggagaaagcgttttgacacaattgtaccgaacaatcataaagttactctactgtgctacat  
caaagacgatgcttcaaacactcttcaaaagcataatctgcaggataatttgacgcttcatgggaacttccggagaacaacgactcactggc  
aaaaatgaattgcagctaccaacatgaaaatgtctcttcaaaagctccaccaagactaatttacgattaataatgacgataaaaaag  
attcttctcaagattatagtagacaaccttccgtttaaactcaactctattaatgcatgatacaaaagtgatgacggaccatttcaaacattt  
cgctctttaaataaattaaacaatgtcattcagaatgggatagtgatgggtttaaaggatagtcagttacgtctattgatcagatgatacttg  
gttcgaaggatagtagcaatattggaccgtcgtgaacagaatggaaactgttcttctgaaaatggaattgattactctgcccgcactcctgat  
atcttcttagtctgtagtgcgaagtgagaggtttataccgaaaggtattccttatgatcttctggtgaaatgcttgggtttattacagcgggtggta  
tgagctttgtcaagaaatccaaactatgaaacattatggagatgttctgtattcgaagccttctgattctgacttgattgaacgtgattat  
accgaacatttctgataacataatcttctggtaaaacgaatcagcctcaaagattcaccgggtgtctgaaaaggatcctgacgtcgtatga  
ttgctaaactcgcctgttctcatgtcgttcgtacatcttccagagaatggctattgcaaaagccttaactccttctgctggttttttctgttattt  
atgagtgagaaggaagcattctggatgctgttattactgtcgaaaaatattgcccagaatgcatgatccaacctcagggcgcaatattgat  
caaagtgtttaaattggcgtccgtaacgggaaagtctccagctgttggagccgtattaaactcagtggtatgctgttaatgatattgtgc  
aaagctccccctatcaccctgttacggctccttgggttatgagtgctttgttaggcatattaccgactgaaacagctctcgcgatgggattgttt  
ttttacaggggaagcaaagtattttatgaccgctttatgcattttgcgtttaggggaggacgaaataaagtcgaaaaatgaacaaactgatgt  
tttcaagtgattcaagatcttcaaatcttactggatgccaatgctttgtatcgttacttttcaaggaactccgaaggagtcctcagaa  
ggacattgaccgagcgccagaaaattgcaagaagcgcaagaaaacggtaactaaggtagaaggtcaggaagctgaaacgtcaaaacca  
tcttggctagatcatctcgcgtttaaagggtcccatttaattctcaattacagaatcatctgaaaaatcatgtaattgtactttatgttga  
tgggaatgcttaatatgtcattcgttaaattccctatttctccttttcaatgctctctttgttttgggttctttaaactcgttctgttcttat  
ttacagattggcacttgatctatgatattaactgtattatctataatgattctacggacttgctatatttctattcattcgtttattaccagga  
attcaatctggttgttttattcctcaattcatcatcttgaagtttaatatattattacaaactgaactaaagttatcgttcccttgacattagtt  
ttgattttcactttcacctcaggacaattttttctatagtattaacagtatataatgattagaaagtaattagaaaaataaggaaaagta  
atgctgtctttacgatagagaatgattagatgtgggtaaaagaatgtgaataaggcaaacactttttaaaggaagagctaaagaaaacac  
caagaaaacagtagcattcaattcaacttaataataatagattccctaagccataactcaggtacaaaagttgaacttgctaccgt  
agtattattcggactcaataacaaacgagcattaaacaaagaaaagtctgaataaacgcaagcaacacagacacaatgaagaatattagc  
taaaatgaatgaattggagaagcaacgtaagtgaacctcgaagccgaggaatgactaccatctggaagattgtcagaaaaataggag  
tgactgagataggcattttgtgaattcatcagaaaaattctcagcagctgctggatctgttatgcaaggaacaatcgggggaggttaactcacgat  
tttctaatttcccagttgattttctgtacattcagctttttgatagcttcatagtcagcaacggaattattgaccaagacgttcttggggtt  
tttcttaaattgtttgatcaaatcagctgcgtcaggggagacgtagaagggtatattgcttctgtacgaactatttctcattattttttatggt  
tatttgagtaagggtggggagccaacaagcaagtcataaataaaataccattgaccaccaatcaacacatagtcgtaaggttgttcaagc  
aaaattcaggagcacagattcctccgtccaacaaaagaatggcaattcgcacctggtctgcaactttgaaagaccaagtcagttacat  
gacatggccttccgatctaaaaggcaattttcgggttcaggctcctggtatactataccaagcttatgcaggtggatcagagccgaggtgagttct  
gcagtataataagcaacggcatctcaggaacattctcgcctcagcaaatgagcaaatagctctcctcctggtcgtattggagaatcaagta  
gagacgatccaaatcttgaaggcataatacaatcggcaataaatggatgccgtactcctctaaaattggcgttcatttttgttctgtaagc  
cctttgtcgaagccttatactggcttctcaactgcttctgggcaacaagcaccgtttgttcttctactaaaagaactttaccgtaggat  
cctctaccaaggacagcagatgggatggaatcattggggtgcatttttgattcggcacaataattgtgttacgatctgaaataaaatctccatctc  
gccaatttactcagctgtaccttctttttcagcttttgcagaatcttctcggaaactgagcttctaaagctcaatgggtcagataggg  
ccgtccatccctcaacgacttcatcgtcgtcgcgacaaccagagtgatcctcgttcaagtagtcttctcgtcgaataaaaaaacaggcattc  
gggataaaaagggtcaaaggcactgaagggcaaaactcccttcaaatagctcttcttgtttttgtgggtttgtcgaagcagtaaattttagct  
gccaacagatctctagttgtttgattcattgtgattaactttaagcttctgtaattacaaaataaagttatctttgtttcttattgagctgctaa  
gtaacaaaaacaaaacaaccataagtaacctcaacacgtacaaatagaaaaacttttgagtggtgttttaccagctttttacatacagaa  
agcaatggccttaacaaagtgtcaaatctctgatcgtatgtacgtgacttttagttaggagcgcgatgttgattgctcgaatgactctcgtagaa

atctatgcatctgaagaatttaaaatcaaagctttcaactgtacgtttgagaaacatttcattgccttcaaagatatattgaaggcgcgagct  
ttacgcaaagtgtattacaaaactttctgtcacttccctcagaaaagtatggtaattcctgttataattttgtagcaaatggacaatgaaacgtg  
aaaaaccgaagcacatattcaaacttcagcattcacacgatttcatctaaacggatgtccgcggtagatggacggctaacggaggtaaga  
cggccacaattcatataccttttgaatgaacacagtagtagtactacatattaagcttaaaaagaatccaattgaaatagattaccgtttacta  
acttttttagtgatcacttcttttctgaaattcatagaaccttggtagcgttttcaaattgccgcaaattctcttggctgcttgacgtgtcatga  
agagcaaacgacgggttcatagcatatgaattctttttaattaagaaaatgacagaaaaatattttttcacaacgaaaaggaatatgatgtg  
aatgactatgcaaactttcattttgggactgaaaacgacaacctgcttccatgtctcagaaaagaaaatcctcaaaacttggtttctgatagaggc  
tcaatatacatccttcttctgtcgcctcacttcttaattcccgacgttcttctttagtccgaactttcacaatctcagcaacatgtctactcc  
ttatggtgaaatggccatgccggttcccttctgtctggtatggctgtagtagcccagaaaggaccgaaagcaatgtaagtgaaagcctatgac  
tttaatagaactatcactcagccgaatacatctaggttacgtgacacgttcttctgttaccgagcatccaatagttctcgaatcaatgtacaat  
gaagatgagttgatgacgaatctgacttgcggttctgatgatcaagatgattttcaagtagaaggcatgaaaaccaagtcggctgtaagat  
tcaacggcccgttacgtataatccaagtgcagcatcttaaaaaaaggacaagaaaggcagatttggtttctgtgcatagtctgccacaggg  
gtcattctcagcttcaaccagctgggtttctgtgacgggtgtaaatgcttaccagccttctcatcaacctcctattgatgatttggcagttca  
gattgaagattctgaatggtagctgatgaactgccagtagtgcggcaaacagtttccattggaaactggtagctacttcaagatattaggctt  
ggatgcacagcaattgctgcatactttttagcctaccagttccacatttagtagatctaatttctttatgagaaatctttccctgatctacgcat  
ctatagctcacaacacgcaaaaacttgggtgaaatccgtcgacaagtgtcatcagtgccgaacggaaatcaagcactttacaagaaaagaaa  
aacgccaagcaagatgaagtagcttggatcttccctctatgtaccatacactactgagtatgtatcccgttccggcattctttatgattatccgac  
tattttacgacttgcaatacgaacgtggatgttcttcaaaggaaaacattttcgctggatgtctgatcatttgccttaacaatttcttccgtga  
aagtcctctgatgtctacgatggatgtaacctatggacagctgggtcgcacaggatactctatcaaaactactagtagtagatgattttttctt  
acgcccttctgttaccacatttcaaaaaagaaggaaagtacaaaagttatgccgatgtcttatcaacggatgaatcccaaagccttcttct  
actgtattgtaattatggaatattaatgtatattaactgttttcttctttagttagtctattatcaaaatattattgtgataattatcgccta  
tggcactatattggctaccgctccttacaagaagccttaataagttcgtaaagtttagcttcaaacttcttcaattgcttttttctcacttctcc  
aaatgaatagtggggcatgttaaaaggacacaccgtcgaaaagggcttaaaagtaagtttagctgggttagtagtagttagattccaca  
ggttctcggatcgcaccttcaactataatctgacttcttcttcttgaatagttacaagtgaagtagtattggccgaccaaagtaataag  
gaaagagaaaatcattcatctttattaccaagtataaaaagatttaaaatcctacatattacgaatcgtaaatttggtagtcttcaactt  
caaacacatgctcacttacaactacaaaatgaggccgccttctccttaaaagcaagccttcttccgttttcaaaagggatttagtctcca  
attccgaaagaaaagaaagtagcctcaggtttctgataccatccattatggcaattctttcgaataaaaatgcttcttcccccgatgaagagt  
ctaaatattggcgtcttggacggctgaagagcttctgatgaaatctttcgacgatcttccaggtctttggataattgccttctgaaaggaacct  
tttctgacacaggcaacggagatgaaacgtcttaataaatgtccccgatttccaaggatcgtgtgaagacggtaaaaaaacaatggcca  
ctattaattgtatttgggagcgcgaacgtgcttaaaagctgaaaagacttagaaaaaaagagtctgaaaaagcgaaaaaatccaatca  
agcgtataggttcaatattcttcatctcaacaatccctgtatgagaatcttttttctaatgttacaatccctttttttaagcaggtacttttg  
gattgttacttttttgttaccattcaccatgcgttgggtaccatgacgaccagcgttaaagagaagctgacgacgcgtcaagcttctttta  
attacatgctatttcaaaaataaaagacgcgtaattttgaatgaagagctgctaattgcttctttaggttgggaatcctttgtatttgaat  
ggattcaagaatggatggaagagctactcgcaggtatccaaagcttaccagacatggagaaaggttagtagaaaaacgcaattcattgtct  
cgtttctttagatagcttcttaggtcgttaataaataaaagctagatgtgaacctagatcgttttagaattcaaaactatgacaatgaaaag  
tgtaaatcccatattaacgttcttaggcatttattcatgaaaaactgccagttactttgatcatcatcacaagcatctgcgctaaaaggaa  
ttggcctacaatttgcgcaagctgaaaagcgtggttaacatactgtcgagaaaacaataaccaatagctcctccacctcagcaaggaaat  
gtaatgatacagagaacacaagtgcaatcatgcaacatcttctccaatgccgtaaaaaagccagctgctcgaagaagcgtccatgac  
cgggttaggtcaggcgcacatgcatattatgttattatcttcttcaactcatgaattcgtcgaagcctcaataattacttctgcgcag  
ggttttgcgattcgtcttggaccaggtccgatgggaaccaacgttatacagcttggagtgctatgaagacactcatcatgaaaggactgtct  
accaaactggccatccagcaaatattgtcttaccgatgatggcgaagaagtagtgatcttttagcaaggggttagtagccttccgaaacag  
gtagccctgtaagattgaaaaaagcaactcactccggctagcttcttagttcaagtagcaggggaaagctatgcagaacgaaaacatgt  
cacagcagcgttaggaaagaacatgacgttgaatacctctcgcacacaaggttggtaaaagcaaccggaactgtttccttaagtga  
gaaagaatggaagagatggaagagatgagaaaacagatgtggatgagctttaggaagaaacctattgttagacaaatcaagattccaac  
atcgattttagctgatgtagtgaacgattttggataaaagacagagagaagaatgttgacatcccttggaaactattcattccatcgatgactt  
tggttcttaattgatacccgagaaattcgaatccgtgggtgatgaaaacaccgttctgataagttaaacaacgactataacttctgtgcaag  
tacgagcttggaaactcggtagcgcctatggattgccagagatagagagacgaatcaagaaattgttctcgattttctgctggaaagaaagcga  
tatgatgacttggtagcctcgattaaagatggacgatttccagcaacagaagcgccttctcagaaaagtggaattagcaccgtcttttatctta

gaagaatccaactttgatgaaagcttttctgaatccattcacacagtcgtctcaaacatacaagtcgatcattttttcacgttcggtgtaccaagtc  
tttagatcactaccgctacttttagcgaacatgacaaaacataccataatctatatgaagctcgaaaaaccttacaattaattccagatttatcg  
gtggaggcaaagacatttgaatccatgagaaagtatctagagagactagaccgctcagttacatcacattactataatgctttctcttctgtctt  
gtcaaagtcttacttcaactcttggtgacatattcattcgaatgctgatgacaatccggtggtcagtgacagaaaagcaatcgagatccagaa  
gcgattccctacattcattgatttttggaggctatgaacggttcttcaaatacaggatcgagaaatgcttctcgaagatcattcaaggctttg  
gatcacaagccattggtccagctctgtcagcaaaaatgcctatgttttcatcaaatacctacataatagattgttgcatgatctccaaggcat  
tttaatacctcttattctgaattatcatgaaacgaaattggttttagcgaagtacgtacgttatccttgtacaagcgactaactaactgacatttaa  
tcttccatagacagataacctgaaaaacctttcttgaacattaactatctcattataatattatgtctgtcgtcgttcatttaattgcggcaggc  
tcgtaggcagcttggttgcctcgcgggattctgtggaaatacagctctttagccagatacaatagctctgactcaaaaaagcagacgaaa  
gctatacacattttggttttaacatgtaccagaagacgagaaagaatacatggttaaaaaatgtttctctcagttgctaaaaagtatgatcaat  
gaatgatgcaatgtcttgggaattcacagactatggaaaaaccaattgtatctcgtttaaatacagggaacagctactactctatgaagatctt  
ggatgtagctggcggactggtgacatagcattccgcttattggatcatgcaactcaaggaacgggtgattatagtagcaaaagtattgtcgcgg  
acatcaacctgatagcttctgttggtaagaggagagctaaagaaacgccttacttgagtcgggacgtgtcgttattcattgagcagaatgctg  
aggtttggcaaaaatccctgacatagcattgatataattactattgcttttggaaatccggaaactgcacgatattgacaaggattgggagcaggc  
ttatcagtttgaacctggtggttttagtgttttagagtttagcaagttatcctccttctgctgagaggtctatcgtcaatacagcttcaag  
tttcttccctgcttggtagctgtatagctggtgatagaaagttaataatgttggaggagatagagcgttttctgatgctgatacttttgca  
agatgattgaacgagctggtttacttttagctggtgatcaggatagaaatgtcttacttggagttgctgcatcactactggtgtgaaacttta  
agtaatgtccacagaaattgagttacgatgcttgaagttgacttttctgcatcttttctcattctttaggaagcggctcagtagtttattcttta  
tgtttgcattaaccaatttctatttaacggttgaatttttactaatcactattatttttgtgagaaaacaataatattaattcactattatca  
ttcattattgaccattattatgctgaacaaaattttaaatacattcgcataatcgtcacatctcattcaaaaggcattgtaacataatcaacia  
gaaaaaaatttagcattaaaaacataactttaaaggtcatcatgatatacaaatgacaacggaaatttgcagataatattatcatggtgaa  
tattgcataaacattaacgatagttcttgaacattatgatcagccttcttctgcttggagaaacggagtttagttacatttttttcttctcag  
gcaaaaggcgttaggaaggaaacgatttccgacttttttgcataattcattcatataaagttagttgcagaagcaacataaccgatgaacatcg  
tccgcaaaagcatgagccacagattccttgagaaactgaataaggactatcgtctcgtttggaagaactaattcaacatctctattggtgcgaaa  
tccaacaaatgggataatttctgctcagatataacagtaggtcaatggaccagcgttgggaggagtaaagtgagcagctccgaacgcttcc  
atcaggctgacttgcagatgtagtttagttaacataggaatttcatatcgaacgtcgaagacgctgaggcttgagctttagctagcacaagc  
aaacatctcattgttctgcgaaatgcttctgcaaatagaagagctcttctgatttctgctgcttctgctgcaagaatataatctcggatcgggtaa  
tttctgaaaaaagaggctggtgaaatcgccgacacaaacatgtatcgccatcattgcttacagaagcattcattacagggagacga  
agattcctttagtattcctgaggcaggtcgcagactttgacggagcagatattgtgaaatcaatgcctcaggttgatgatcggaatttctggtt  
atgcacctgataaccattgttatagtaggtccagttcaaagcttattgttttaagtgggagaccagtaatacaactggccggcctaaccgct  
gacgcgatatagccatacttccaagcagacaaacaggctgatatgtcagcatgttccaactgaaaaacttttccgagttggggtaaatctt  
caaacgaagaatcattagttaataaataggattgaattctcccagatattgggttagagattaagtttttaattgtggatgttcagaacaca  
ctttagcccgatgcttccggatagaaatctcgaaggcataagctagactgatttgaagaactgacaccgtcataatgacgaaaagcaaaact  
tatgagtcgataactgtgaaacaaaaaaataaaaataagaaaagggaataatagagaaagcaggataagatggatcaataaattatta  
aataatagacagcgatagaactttcttttttccaagaaagttgaataaatgacataaaagctcagagaattgaataaacagtgacaaaag  
acgctactagcgaacaatgcttcagagaataccaattactcaataaattcgaataacaagttggaatagccaataatttaaatatataaaaa  
tggaggatgtcaatggctggcaaaaagctttcacaaagaatgcacagtttgaatccaacaaataatgaacccaaaagcgaatatgggaaa  
agagaaaaatccaatcagctaacgttctgaattatcaatgtcagggaaatcttggaaattgtttacagactactcgttcacgcttaactgaaatg  
cctgtctgatgacgaaaactagatgaaatctgatattgcaatgaaagttgttatatcacagaaaatgacaccgactgatgaaatcaaatcc  
ttcttctgtctgatcaagaacctgttaaagacaagttgaaagatgagaaatcaagcatgaaatccgacaggtgcaatggttgcgtaaacagatt  
cgtgagcgtatcatattgggtttggtgatggctgaaaatcgaataaaaggcatccatggtgtcgttttaacacttataagaggagtgcc  
aatgtcttgaatgtggggaggcgttaaattgagcattgtaagcgaataaagaggcaatttcaaggggagaaatgacggatgtatgacaa  
gagaaataaaaaatacacagttgattaagatgaaccaaagtaattcagaaaagagcatttgtgagactgcagcaaaaacaggtccacctt  
gattaagaaacgttaaagggcttctgttagtaaacattgtcatagagctaaagaacaaacaagtttgaagcatttagcagaaaagaatgaaaag  
gatttcatgaaaattctttaaagattgataaagatcatggcacttctgtaataatgtgtctatgctttagttgagttgagctgactttagttgactt  
gcaaggagagtttagtggggaatgagaaagcaggtttaaagggaacaaaatcatttgaaccgagcatatgtatcgtagaaatcttgttga  
ggtaggattcaacaaatttgcacatgagaaattcatataaaggattgtcgaaaaaacagaatgcaatggaaggatttaccgtgtgtgtagt  
ataatatactttaaagacataattgacttcaatcaatcaatcctgaaagaagaacgtaaccaggttcttcttgcataacttccgggtgac

gggatgacggcttcatccttgggaacgctcttctcatagatgtaggaggactttgatcgccaatgatggttctttcctgtggcttgaagat  
gcaaggttgccctctgcttctccaaatgttgatatacctctgctattctcgttaaagtcgagtttctacgagggatgagggtcacgtgaaggtag  
ggacagtctgaccagcgtctcgtccctagcaatattagcgattagaacgcttgatttacctctgatgaattacctgaataccaatgttgaag  
cacttgctgtgtaaacttttcgagcacagtttaaccttagcgacactctaaaaagatcactaatctataataaagggttaaaatgactgccttag  
ccttttgacttgcttctcgaagaaggtcgcgaagcagaggtacaacctgcgagggattactaaaacgtggcaggcaaaaagggttttag  
attaacaatcgcaaaagaatgctaaataagtacaagtcagcaaaccttaaacagatggaatcgctcgtgttcattgggtcaccaaaaatctt  
tatgaacaacaacgctgttcttcttcttcttcttcttcttcttcttcttcttcttcttcttcttcttcttcttcttcttcttcttcttctt  
gggttcgacatttgaagtaaatgaaaagatttcagtagttgaaaaggggaaaaactacaaaattgaaggtaaaatgaatggctctcatttg  
cttgtagcagcaaaccaacattcatctcaaaaagagtcgaattctaccactaaacttctgttttcaaaagccttacagagaactttattacgg  
ttttcgttgcaaaacttgaaggagaatctcgtatgctgtgtaaatcagtaattcatgaaattaagtttttaataaaaagtaacacaacttgc  
tcataatattctgactgctgtgaagaacataaacaggataaactgttttcataaaaattaacatatacaggaaggtataaagattcgtacaaa  
gcagcaccatttaattttctattgaaaaaagaatggaccaggtgaaggatccggttcttaatacaaggagaattcatttttgattttgtgtg  
taccatggaatgttgatgaaagaacttattcagttcagagcaggttaagggcgaactcggatttttaagaaaaagataatggcgaagaaaaat  
ttttgggttgtagctggacgatgattcccatttaatacaaaaaggcagatattaatcttccctggcaagactctaacttagtatgcaaaagttcaa  
ggaactaggggaacaatcgctgatatcggcaaccaagtaagcaatctcaccagagagtcgagaattgggctttgatgttgattgacaagg  
atctcattgacatgctgaaggacaccaggcacatttctatgagcgaacaagacagcagcagcattgggtatcagctcggttaagactgcgcaag  
aaacttcggggaagttgacagcactgacactgttaccctcattgatgtagcgaatcagtcctcactcaactcaagaccaatgttgattgagcctc  
ttcagtgctaccgctgatgtaggagtcagataatattctgcaagagcataactcgtggtccaagcgttcaactgttggcgaacttacctta  
ccattaccagcaggttcagagggtagacgtcaatagcagcaccggcaagcttgcgctcttgctagcagcaacctggcagggatgtcaaca  
cagtaccagagaagcgttaatgagatagctaccgttctcatggcagcaaatcagcactagaacatgttttctgttcgggggaagcagga  
acgtgaaacgagacaaaatctcgtgatggagaagctcatgaaggagctcaattgcttggcagaacccaaaggcatgatagggagaacatca  
tagtaaatgacgtgaaggccatggcttcggcaagaacagaaagttgggaaccaatgtgaccgtaaccgacaataccaaggtctgccacgg  
atctccaacagccattagaaacttattccattcaccattgtcaatccatagagcagatcgctacttgacgagcaagcagatgatttcgcaa  
tgacgagttcggccaccgaacgagagttggcataaggcaggtgaagacggcgataccacgctcggcagcatattccaaatccacttggttagt  
accgatacagaagcaaccgatgacgatgagattatcggcggcctcaagacagcttagtcaagcgggtctggaacggataccgatggcgtga  
acacccttgatttttcaacaagctcattctcgttaaggggaagacttaagaattctacttgatagcctcgttgtttcaactgcttaaggcagattg  
gttgacgttttcaagagcaaaatcttgatgctctgaagcaaatggcttcaaggcagcttttgcgggttggttaagctacgaggagcttgaat  
tggtcgaagaaaaaggggttctgctggaggagacaaggaaagttgagtcatttcatcgacagtttggtgagattcgttatatccatagtg  
aagtgatgcaaaatgggtatcgtacagatgaaaaggaaagcaagaagtcggttgaatgatctctcaataacaacaattcagaattcgttt  
ctaatcaaaaataaacctgtatacttaaacgaatgaactgtaatttacctacagcttttctaacaggtatagtgaaagttgttgggtttg  
gtaaggaaagattcacctaagagaaaagatcctcgtcattgatcgcacgcaacttggaaatccgagctcgtccgtatataaagtgaaaa  
tccaacggttgatagaagagataaaaagggtgattacgaattgatatacaatcagataccgaagatgtaacaagagtcattttgtgaaaat  
cccgttcgaaaatcgttctatgttgacttgatttgaaaaacaaacgtatcaacgaaggaaatctataagaaaaaagggggggggggggggg  
aagaaaaacgtgagatttcttaagagatcctcaacgagatttcaaaaagatggacattgtgaatcccattgttggctatggcaaaaacaagaa  
aagtcaagcactgtgattgacagcattgtaaatataatcggcgaggagagagagagagagatagagagaagggaaagtttgggttgcg  
actgtgttttattacgaccacagtcagaaaaataatagagaattcgaatgttaggaaatgaacacagaaatacagaaaaagtaata  
aataaatcggatgaattcattcgctatgaatgatttttgaaccagcatcgtagagaaaggaaatgtcacatcatcgatcacatagaaataa  
atgtttaaatacctctgtatcctgttttcttcttcttcttcaaatggacacattaataattgaatagaagagatcgcagttctttttgttca  
ttacttttatttttctacccaaacatgtaaaacaacaaagaatgacaataggtaatgctgtacgatttgcgtaccgggtcctgaactattgt  
aagcagaaattactgaataaaaattagaagcctcgttattcaagcaactcctcgttgagaattgtccttaacaatggcacaaggtgtt  
gtttgatttcttaattgttctcaagatacattgaataaaagagtggtggacgaaaagagatggatttctctgtgacttcaaaaacattgtatt  
agtaaactctttgttgagatttgcatttggagaacgtgtcggatcctctgattgaataccacctattctcaaagtttgatgctcaagtaga  
ttgagagctgatatcgttcttcttcttctgaggtccacacgcttgataataactcaaaaggtgcataaacaggtgaattt  
ttactgttctgtataataacgtagtaaaccttataaagaattcaattggtacttgagattatccctcaataaattgaatgtgttctatctaa  
atctagcttctgtatttattagaaaagagaacaaaagccatttatcaataactaaaacaaaagaaatgcagttttattgttagtccgtcaa  
cattagacactatgcctgagtggttaaggatagactagaaatctattgcggtctccgctcaggttcaaatcctgctggtgtcgtttttggaa  
ttatttttagttcaacttgaaatattaccattcaaccaataccttttatttttatttttcttcttcttcttcttcaactattaaacgtatagaaa  
cgagatacattgctgacggttcaaatcatgaagaattcctcagtagcgaagcaaggttcaagtaacatttctcactgaatgcctgtagaac

accatatacaagatttatcaactcgttcatacctttatttacatacaacaatcagtaaaaaagtcattgagtcgccgttcgtaacttactcaaaaa  
atactcagcatatcttgagattacacttgcagtagaccagccaacatttggtttttttggtaatacatccagcgatacaaacagaatcttgattgacag  
atgagtaataatattcccttaagcctaacaatacgttcgccacactgcaacattcaacaactgtatctaattcagtaacgtaaatatcattca  
aacatttatagcagctccatataagaagatgttcttcaacactgcttgcacaaatggctgctgacttggcccagaaaaggcgttgcgctgacaaaa  
tttaaattctgtaacataatctgtaaaatcttacagacaaaatatttagctttccataatgttccatggcacatttattataaaacaaaagat  
tagacaagttggatgattcgcatgcaaaagcttttactgctgacgacactcagcagggttctgcttagagtgggcagttcgatcttcatcctcgttct  
cggaactatcatcatctgaatcggaagttttcattggaagaagactcggcatcttcatcgtcatcttcaacatcaagtcaccgaaactcatcat  
aatcctccaaggcttccactgtaaaccaatcgaccgctcgaggaatgagcttttcttaaaatcttccaatttggtaataagttccaagagttc  
atccaactctggattttcttcatcatcctccatctgaggagggttaaagaagttaaagaactatcccagggttcggaactttgacagtagc  
agtttcttgggttcttattacgttgttcttactacagttcggacggtaagctgctgattgggatgccattgaaattctctcccttggcgtcgcct  
acataaacacattggaagcaccagctcttccaagtaataataactcttgcataacatttggtaaaaaacggattttctcaaattcgaactg  
tacttggaaaccaggctttccatgtaacaagacgaacatcaatgagatgtcttaatgcccttctgcttccagcgcttatcatctcagagagagat  
aacacattttcattgtagtcaacaaaaatcgggtatacccttcatctgtagcattttgaccctttcttaggaccttagaaatgtcttccactt  
cagggactcccttcttattttctcctcgatggctcctttaccgtgaacaagctcagctgcttcttcaaaaagaggccatatttttagcaaatg  
tcttttcaattcaacaactcctggtgaaattggagctccaacgaggagtattcctttgtaaacttttaactgaaattctttttgacgggtgt  
gggcaattcagagactcgttgcagtagatggcgtaaagaatccaactaccgtcaatagctcctaagtcttcatcgccctgtaaatagttta  
aattgaggtcctttacccgaatgtagtattgttgcgcttgaaggtgattctggggagtgggtgctgctgacatcttccagaccgatttttat  
ccacttttccaccatttttagcttattttatgagtacaaaaactactcactctacagcttcaactagaagggcgttgggtgtaataaggaaatc  
catgctgcctttccaggaacttaacgcagctacggagtagttgttattctggccattccttaatatatgaaattgcaatgatttatgaaatcatta  
ctttactaaaagatacatttaagtctataagaattcatctttatttttttacttattattagcttattgacattactcttgagagtgttctctc  
accgacatttagttacaaaagcgttatttttcatgtatacattttctatcctcaatgtatccttaccattccttgaattgttttttagagaagttc  
caagttccatgtaaaactcaattatattcttgacctttatttctgttcataatcatcgatataattagctaattatcttggcacacattgatatt  
tcgttagacattgctgtgatttgggtgttcttcaatgtaacatttctcgattgactgccaaaaacaaagattctgcttctcgtgatatacttttggc  
aaagcagctttacgtgtgattcatgtaagcgtgtgacttcttgaaggacacataaataattagcaacacaacttaagttccaatcatcgg  
gaattgtgctgatcaaacgaaagtgaatagtagacccctcgggtatacaaatcttaacatagacaatgcatgaaggtccgggtggaat  
gctttttccaagagaggttccagcaactagagtatacgttcaatctgctgacagtaaaagctcagcaccttataatcatacacgacttctatc  
aaaacagccaatgccttctgtaatcacctttttatggaaaaacctatgctgacgttggaaatagaccgagttctttgaaagacctgttga  
aacaacttcaaaccttgatacttctcctgatccatgtttctattaagctgatagaataaataaataaataagagagcagctgtcaaatcatt  
catataacaaactgggtatccaaatactgtgcaaaaaatgggctttggtaaacaggaagtttgcataattttcaattagatcttccaagcgagc  
ccggaattcttcatgctccaaaagccatctagcagtttattcacgcaaagttccaataacaatcctcgatgtgatattgtgttgacttgactaagt  
attcaatataaacactatcattcgcgggatctaaatttttaagacatcatctccgatacagaaccagaaaagcgtttgtcaaaaaagcttgg  
tcttcatcagcgtttcagcacatagccaattagtagtatacttcaaaaaagagaagatcgatgtcttcaataacaattcgttaattttgttattc  
atctcgagatcgttcttgcatttccctaaatcaacttttccacaattcaactgttccagagctttatgcaattcatcagcaatataaccag  
caagtaagtttcttctccagaaagtaaacgttcaatgtcatcagggtagccaaaccagactcaatgagttcttccagcatttttagttccttctg  
cgatgtcttccatgctcaagtataattcaataatacatgatccacaacgacagcgatatacttttcaagaacaaagtagtcaataaataa  
catttgcgttataattttcaagtagcattagcatgatgtatgcttttcttctgtaatcctcaatcatttgccttctgagtatactctctctga  
aacaatcattcaaggatagcatagaacaatcgcttcatctactggagaaaaagttacaagaaactctgtataccttgaaggtaacgtagg  
cgatgcgggtcatcaatacatcaggatataaagagatttactcttggatcaattttgaaagttcagtaaaagacaaagaattttcatattgtcc  
ttgcttcaatattgcagagctgccatttgcctcagatataatgactgcaatgcggccgctcatggtccacatgatactttcaggatacttcaaac  
gcttacttaaccgacgaagtgagattcaatttgcctgaagttatagctatttccaatcttcaagaaggatgattcagtaacaaatccccatgc  
atttctcgatgcaaatagaataattggcttcaataaacaacacttcttggtagcttcagaaggaacttctcggagagactctgtatttatgatta  
agggagaatttttcaaaatttctcatcaaaaagtaagtatttgatgcaggggagataaatgaaaaatttggtttctccatcaaaagcaaga  
tttttactaaacgtaatgtctgtatatcaataatttgaacatattaggggctagagcaaaagacataatgagaggttagcaacgacatctttagga  
tagaaagaaaagtgagtgacttttagtaacgttgcattcatatccagaaaagtcgatagcatcttgggacttctgtgatcagtagaaac  
tcgttattttgactaacaatcatcggttttagatgagagctcgtgacttccagaatcattttttattatagaaacaaaggaatgttttccactgtaagg  
atgtccacaagctcaaatgactgatccgtcaccagcaaacgttcttccaaggagcgttgcctttgtacattaggatacttcaattcctgaactg  
gttaataccgcaagagacagcaaaaatgaatacactggttgcgaaggaaaaatgtaccatctaattgtaatgacacaagttgaatatgagagct  
cgtgacaacaagataggtggatttctcctcaatgaaatgtccctcatgactaatttcaaccaggtggctcgagcgaagaggacgggtaaacgaaat

cgaggtttagcatgataaaaaaccgctcatctataatagtagtcaataatctgtatacttactgtgaattcttaccttgatgaacaa  
ggatagcttcaagaaaggaacacaaaatattctctgaccgggtatttgacggtaaagctgcagacttcagaaactgcaagggttctaact  
atcagctcgtggattagcataaaaccttctacaacgtctactaaaactaacctcagttcagaatattcgtaaaaaaaattcctcttgctcgt  
ccgaaataagcatgaccatctaaagaaagtagtctgaggaaaatatacatcccagaaccataccatgtaaagctattgtagatattgatcttc  
aattcactatcaagctcataactgctgagatataatccgacattagcttttagccacatgaatcaataaaataattataatccataaactaaag  
aagaattgctgtttttatagagaactgtaaactcaacgacgcagcatattccaacaagttacatcgactttcaacaagcgtaccgaaatgc  
ttagtaaaacaaacgctgtctttgaagttgcttatgaattgatgatgaattttgagctttgttcgatgattattctaataatgagtgagcattcaca  
cgaaataaaagatcaagccaagtaagtttctgttcataatgaatcaactgaactttgaagcaaacctccgagaatacctcatcatgcacgt  
tccgattccgttttaagactttctgaatgaaaaatagatactaaaaaaacacaaaagacaacgtatgaaccttcatacatctcaagttac  
caaagtaactcacttagagagctaaagcatacctcactatttcaaaaataggtagtagctgggtgcaacaattactactagtcattat  
cttgagaatagtaaagacggccaaaatggctgtgtgcagacgtacttcaaaaattaattgattcctggaaaagcatgtgatataatctt  
ttgtacgaaagactaacgacaacaccagattcccgggtcgaggaaactacagaaagaacagatgtagcagccgaagaagtgaaaagacccg  
aaaggctcttggaagaaagaaagatcttttaaaaactaaaggataaacgaaacgtggcagtttcatggtttaattgatgttacacgca  
ttgctattcaacagaattcaaaaaacaaacagatgaagtgaaattggtagagatgaaaacccctctgaaactatatcaaggaggaatagattcc  
ctcaciaaagcgtcaaagatgcagaatcatttttccatctgtacgaaaccttaggagagttccagatccatattctttattagagcaggcag  
ctgagattgatcaaatcaagcaagaactagaatccaaggagaagaagaaaggctctcagagaagaattgaaacaaaaggagtccttatca  
accgaggttcaagttgtagcaagaattgcagaaaacaaagaattcggttgtagcagaatacagaaaagggtatcgaatccgttgaggaa  
tgtgaaagaaagttctcagaaaaagaaaggtgtttaaggattctgagcaagaacatgctgagacgattaaccaacttaacaaaaagttcgcg  
aattacaagctacacaaattgatcactctgcagtttgacaattagaagcccaactgaagaagctatcacaaaagctcgaataataaagt  
ttactaaacgaactgatgaagcaaataggacggttgctcttttagtgagcgaataagaaagttgaaacaaagctctgatgagcaagcttg  
aaaacgacaactccgacaataattgaaagaacatcttgattcatggaattgagaaatcgagcttactgctgagctagagcaactcatcaat  
cctccaaaaagagctagaactttcaaaaataccagctagatcttgagaagcaactgaacagaaacagaaaactattcataatcagcttga  
gacctgaaaagctattcggactacgaagaatgaaaagagaactatccgtattaaaacaaattgaattgagcgtgactcacagtcgaatgag  
tcaactccctggaagcccagatcctgaaacgcgaaaaaaagctatcaatgagctttagaagcttagaaccaagaagcacacttaacaga  
agctgtcgtgaaaaaacgctagtcaaaatttgtaaaagacaatcgtgaacagaaagaggctttacagaaactggagcgtgaattggcttc  
cttaagtccgaaggaagcatgtcctatgtgaataatggttatcgtgaatcaacggtcgcctttcccaacttctccattattggaggtagctca  
gtgtgttggtgggagcaccatgtcaaaagctcactggtacagaaagtagttctacgattatggatattgtaagcagcaagagatcggtttcgac  
gtgcaatgtcgtacttagtaaatcaggtcagttcagtaacgaaaagattgctactttagagagtaaaacttagagaaatggagaaaagcaatgc  
actgttatgaacaaatgcgcttccgtgaacagatcaaaaacatttgcagccgagcccttcaaatgaagcagctactgcatacgaataa  
atatttccgttcgctctttcagaaaaaggaagccgaacgagcttttcaagaatgggctcattgagcgtgtgttatatgtgcttttacgtaca  
attttattgaataatggcaccagaactatattttgacctattgataatttgcacctgttatattggtcgttctttcaaataggcgtgctgtcaa  
cagactatagcttaccagaaccgacactaaaaccgaatgatgatttctaactcttaaatcagcaactttatggcttatacttaactga  
atttccagtgactaatgaatcattgaaaatagcgttaataagccaagtaagactcattgagtaactcgtgatgtcctcaactcgaatcag  
tccctgtaaatcaagatcagacaaatatacgcagccatcaactacaaatcagttacattacaccttatacacaacgactgaagaatacaa  
aaaactcaaacatgaaaataattgaaactctacagaactaatagaaactacaataaccgaatccattcgttaataatagctccgttcttttac  
taaatctaatttaggcagaggtgatggccttgcgagcagccaagttacgagccttagcacctgtttcaagaaacacgggcaacctttcgttag  
ccttaggaacagcgtcttctcagcaacaataattcgatagggcaaggatgagacaagtaagcagtgacacgaccgtaagcagcgttagta  
cggcgggttgcttaggagcaccattgacttgaatgtgcttgatggcaactgtccatatacacaaccccttagcctcagcgttagctcggcattct  
caaaaggtcaaggataacctgacggacttaacgggccaacgagcttgggtgacaccgaattccttgcttgagcagtagcaccacgcccga  
ttgaagcgcggaaggaacagcttcttgcagtaacgattttcaagtaagcaaggccttctcaagttcatgcattgatgggtaaggca  
acttcaaggagttctaaagttagttctcaagtaagaaccacgagccttggcgacttggctcagatgcaggagctgcagagtagcgtgccatt  
ttgttttgattatttttaaaacttgcgttgaggaaagcttgaattctgaccagcacaatcttgcactgtgactgtttttcttcagggtag  
tggtgcaaaatacggttgttatttgaataacgtgtagcaactacttataatcatataaattacatgctcgtttttataaataatgctatg  
cataatgaaaagagaagttttgtaattgttaaaactgatcattctgagctattgacattcgttagttaaagggtagtagtataaaaatga  
agagtaaacagaagaatgctttatcgtatctgtttacaatgaacgaaaagccggtgaaactaaaactgaaattgaaatgaaatgaaatgaa  
gatgttcttctcagatcatgctatgaaatgaagacgcttaaatgaaatgaaagatgaaaagactttagtgatattagctgaaactt  
tataatgacaacaacttctacagcatcacctagtaattttaggttgcctggagacatttttgagctcttccccgatcgggtcaggtactcag  
gtaagagtagctttctgagagtgagggttcgagggaaactttgttctgctttggtaagtgttctcctatcacgccttcttcttccattcttgg

aatcgtgaagaagcgtccgtggttcacatgagtagataagacatgaaccatataatgtaggaacaaattggaaccatgccccaggtctaatt  
tttatggtatthaaagccattcacggcactaatgcattaacaaagttatgaagaaaagaagcaaatatgcagaaacgtttaaaatttatagcg  
tactatttcttggtgacatcctcgtatgaatcatggttcaggctcagacataatcgtaacacactgcggtgaaacatggtgaatccgctgctttaa  
attggggatgattctttgatgagtatttaatttgcaatgctacgaaagagaaaagaagcaaatcttattctttgcttcataagttctatt  
ctcagtagctttttattatataatctcggttacttgggttatttaaaatctgtttcaaatgattctggttatgaaacagaatthagagaacgtattgcttat  
catttacgggttgggttgaataatcttctgctacttttgacgcctgctgttgaagttaaagagattcagttcctatggaagattgtcaaggaaa  
ggcgattaaaaggtaaagtagctttaccaacgtcttaactatagctccagctcaaagaacagttcttcagagaaatcataagattttagaggatg  
cacctcgggtgctctgaaagaatcgacaacattgctgtaatgattggaatgtctacaagaaaacttacagaaaatgtgtgaaatatactgac  
aagcagcgacatccttgtgaaacacgaataatcatgaaatacatagagcttcttatgcagcgtataaaagcagaacatcactactacctaa  
aatgattgattagtttacgggtatagcaagttgcagtaaccagtatatctctaattagctctaacgaagaatgttcctctcaacgaacgctctca  
tgaaagctacagcatcaccatataatgagtgactgtacagcgtctgaaactgacatgaaatctcaacctgctaacaattgtcattgtcgataatt  
tagcccgtaaagctcattttatgtactgtattcttacggcgcaaaagttattacatttcgcataattcacatcctttttcttctttttcttct  
acacaattaaaacccaaaaaaggtaaaacataactttagggtattgtctgtccgctattttgcttctactctcagacacttttactgtgtt  
aactacagctaattcatgtccttgacaaaatcgaaacatggagacaaaacactaattcaaaaaagaagataaatacactttaggagaaataaac  
ccattgctattgaggaagatgattatattgaaggcttaactcaataattcaaaaaacttataccagacctttctcgttgaaagccattcaga  
aggattacatatgaatttgaagatgattatccaagagaaaaacgacgagttcacgaacagctggcattactcccgaaaaatgatcatcttg  
tgagaagctaaagcgtagtagctcagggagtaacgcttctgattatcagaagaagttcacttctgaagacaatgcctcctttctgaactgttca  
taatgaaaagagtgtagaaagcttactgcaaaaggcgtatggtatgtacatgatgaaaaagctgtcagcagattcctcctctgcaacaa  
acattcaaccaagcaaggcaattgcatggaaggagagcccaataactattcatacttggaaattccaaccgagaaattcgtaattgtttatcctc  
aaacctcagaaccgtctcttaaccagagcaagaggtcagcatcaaaaaatcgatagctcatcaaccggcttgatgacgagttataaagaa  
atcgaatcagcccagccaggatcctttaccggaactgcaattaacaggcatgaagcctcaattaacggatcccttgggtggttcaaattatgg  
ggtgacctctgaaaaatcatcgacaaattctatattcctgagacgtctgaagagaaaaactgcatgatctccgtttacatagcttaagtctcag  
aataattcgccttctactcctggttactccggttctctctacggctgaacaagcatcgcaacccagggaaagcttctcttagactttctactttg  
actccagcagctaaacgttctgtagcgcagctatattgacggcttctactaggactcccccaatgcgtcgtcgttgacggctacttcagtagca  
agttttcttgacacctacacctgactactaaaaaccctgccactcctaaccagctctaaaaataacttataatgagcaagttatgaatgaatgaat  
aaaaatcgataatgcttactttgtggaatgtagaaaaaaaggaaacgtatcgaatggcatgcaaatctataatgtaaatgaagtgtgaaatgatg  
ttattttaaaaataataaaaattgaatacataaacaattatttttaacaaaaccctgttattcctttttacaaatattaatctagataaactca  
ctctctttttgaatttcaatagaatgggtttgtctgattcccaaagagaagaaagcgaaaaaagcctcatctataaatgactcctggcttattga  
aagaatacattgatgtaaagcgaagatcgaaggacaaaatcattcctatgcagacgcacagaatgctggatggcaggaagttaaagttc  
ggcctctgtacatcaccaacaacaataaactactgtaaaaccatactttatagcagggtcagaattaagaaaagagactttgtcttcagtttcgatt  
agccgaacagaaaaattaggaaaaacacaaatcgacgctgctgaggagccaccttaaatattaatagagattcgtgaaatttaggaacatga  
gactcagaatccacttgcaaatcgaacaaaaggggagcactttgaaggaaatcactatagcaagtgaacgaatgctatcagccgttttaac  
caacgatcctccagctgtgtaactgttcaaaaatgtaggaatattgtttgattcctgattctgagcttgaaaaaactgttcaatggttcaa  
acaaatccttagtaaatgatgtaccagctgtttcgctaatgcatataacaacaaatggccagctttgtcaccaatttggtagcagcttctctgg  
tcttttgggttgaaatccttctctgttctctgagatttctggatcattttcattaactcagacagagattcagggacacctttctagattg  
attctctatttcttcttcaacaattgttttagtctttgttaactttggcctttagttctctgctcagacttcttttcttttgggaggctcg  
ttttccgatgcttctgtaaacaggctccttctcaatctttctatcctgtccgctttctcagccttgacaaccgttaaatattaatgtccacaagcatca  
ctacactttactaccattttgtgggttattgaaatattggtatgggggacaacagctcaaacgtgaaatgtcgagttctcagctaaacaaaat  
tttctggcctttagtataagtaactactaacaagtgaagagcgaacgtttaaattctcaagcgtgtttataaattttctctcatcttctctgcat  
atcattcctcagaccttcacctgtctcgtagaaaactcagaacgaaagaaaatgtctatttctattctacaagaacatttcaagcatctat  
caaattaataaattctttttatgtaaaaaactttttggaaacatcatactcatttactcagatgatgatttagaataatgatgtaatggaac  
ctgaaaaatatacgtaaatcattaacgaagccaagtaccatattctaaacgttcgtaaatgcttacagacacaaggtaaactcagcgaact  
ctgccaattgattgaaacagttctacgtgaattgttctggtttgtggaattgaaatattggaattataattttataacaagggtatctaggat  
attttgaaagcgtgctccttcaattctgtaaatattgaaagcatagaagtattatctttatccttattctgtttgtataaggctcataaagcttg  
gatatttctattttttgtcatatttactgtatattactgatcttctgtctagtgtacaatgagtgaaatgagctggtacagggcaaacgcttca  
tcaaaagcgtaggtttctgaacaagacgaagttctatgaggtaaaatattttcaaaaaagcaacttttagaagaattgcatagtagcaggc  
gacgctatgaaagaagcatccagaagattggataaacagaagactgtaattaaatgatagattacggcacatcgctttttctcagttgtggtggcgc  
tggtagctcagcaattttattgcatctccagaatcgcgagcctgctgattttgggaccgaacagctccattgctgtgagcagattctcagattg



gaacacacaagaaagtcgtttcaaatgaaagttcgggaattcgtacaatgttgaacgaatcattttccagaaataatgaaaggactaatgcaacgtagaatctcaatccgcttcacttttctttaaagacgattcgaattaagcaagcaagcaggctctcgattccgaaatagaaaaagtaacgaacgagcttcagtcgcaaaaagatcatctgcattgtattttaaagcttctgatcgatctagtagttatacattacgatgtatcaatgaatctgtaagtttgatccccctacaaagacagaaagttcaataaataaaaagggagcaagatgcttctgtgggagaagctttgaaacagcagctcaattgcaagagctttccagattacaagaagaccaacaagcctaataatctatactctcaacaattatcctctgtcgatttcaagttgactgaagctgaaatctgttattcaagaaaaaatgagcttgggagcgttgactgggaacatcttcagaaaagccttcttattgaacttaaaacacgttttgtaatgacgtctgtcaaatatggattcctcgaacaactggttactgaatctgtgaggagaaggaattttgctacaacagaagaggaactttgacgattattctaggtcatattatcaatctattttatcggattttgaaactcagattgtctcattacaaaaagatgaacatagaattgccaggctaaaacagatctgttgaaagcaagcgaagagacaagcagggttagatgaaaaggcgactacattaaaagaaaagaaagaaactcaaggaactgatctgaagtgaggagaaaccaagaataaaatagagcaataaatcattccgttggctcaagttgcaagaaggaatgaaatctgactctttcaaaaagagttaccaattttgaccaagaattagctcatacggagcgggctttcgtttagctaatcaacaagtataaaaaaaatgatatcggtggaggaattaactaataagtaaaaactcgaaaaagataaagcagaacagaagtaactttgtcacgatgaaagctggagataattcatgtcgaagtagagcacttcgtgaaaaatacaagaagcggatgaaattacctcaagatgctacatgctcagcatctaactatttagatatcattaagttagaagaaagcatctctgtactatctgaggttcgaaatacatctcaagatattccctcagtttcaagttaaacaagcaaaattttcgatactagtttgagaaaaaagtaataacctggatgggataattgaaaaagcaagctgaactatccgacttgaatgaacaactttcttactatgctcaaatattgttcttgaaaaacgaaatgaacatcacgaatggcaaaaacgaaagttgagggacaatcagatcatcatctgaagaggaatgaaagatgtacagagctatgtgtaagttctgtttgcaatttgaaacgtggaaaaactctgcaatatctttgtgggcatgctttctgttatcaatgcatacaaaaagaatagaaacacgacaaagacgttgcctatatgtggtcgaggatttgagcttctgatgtgttctatgcaattataactgctttccttgtaatgtaaaatactaaaatcgatggtcgtaatttactgctgtgataattaaaatcgggttatttaagaggatattatcttattctattttcaattacatctctgcacgtagtttgggattgtaataataataactgcgttatgtaagcatgcataataatcgtaattcattaaacatcttccgtagctatatgataaaaccaatggcttattttggtcagcgataacggcattctccagttgagtcattatcaagcccactttttagatactgacgtgaaggtcttcttccacttttattggcatcctcattaatcgctgataataatacgaaccatttgctcacatcttaataattcactggaaggagtagcataaagttcaataatttttggcaccatttgatataccgaaaactttcgaagccttgggaatgaaacatcatgcaagtttggtcagagattttagcaacctggattattgttcatgttttaagcatctgtaaaacaagccccagattcatggattcaagcttgagaattcgcataatagcaggaatccaaaaatccatcaataccatggattacaaaactagatattgttagcacttgagattattatcatttattacttactttgttccatgcaggtagacagttcttagcttcaaaacagtgagacagatggttagcttcaaatccacaatagaacatcaggtcgacctgtaattcaactacataatcaggaagagtcactgtttcctgaaaagcattcatatatcgtagccgtatttccattctataagaagtagagcatcaaaacttagttgtgaagcttttgaataactctcgtaaactgaaaagttagcatgaaatggtttcgatttcaaaacttttagtgaaatggcttctgtagcaaaaagtcatttcaataaaggaataatgtttccatttaaatagctgtgatcgtgtaaaacattcgaaaaatcatcctgttcgagataaaacgagaaacaccttgaagaatccactccatggaattgtagaaataagagtagctcaggtaaatccgaatcttacttaacacagatacaggaatattctgtctgcgatttagtgccctcgattgtaatagctgtttattttcagaaatgcatatttcatcgagatcggtgaaatcttttggtctcttcataagacgaattaattggggataaataaatcatcatgtagtactcgaaaacgaacagtgatctacatcctcattttcctcgtcaaaactttcattattctttaaagctgaccgacataaatcgtaaaaggttaatatcgattatctgtacattcaaacatacctgatataatcagcacaccgaagctgaaagcgacttaataaaccttcaataatcataaaatcatccaaattaaagatatagttggaagataatcctgcaagctgtatataatcaacaacttatatggcactgctgaattagcaatcaatgatcatttaagattcaacgtactttaaatagggaaacttcaaatctcgcgaatcggatatactcgaagaatagcgtctcctaaaatgtttcgagatggctagacataaaatgaaacagctggggcacgtaatgtccttgtaaaaattctttaaagaaaataacagcaaaatctcgagacagatgagggctactacagttagttgctaggaatgctaaaaattgaacatactcctaaggtaaatgatggcatcttcaaaaactcactgtagaagaaagcacagaagaagcatgaaatcgtatggacctacaaagcagggtagctgcaagcgagaaatattcttgaaccagaaaagattcaattgtcagacagaagcattggagcgttggctaagaagccaggagcaatcagggtaaccaatgtctgacatcttataaaaactgcttccatttcaacagctacttcaactgtaacgtcaaaagcttatcagctggttctgtcccgaagttgtaaatggacagttcattgcttctgatacttcaatttctcagtaaatcatccttgataaaaggaatcacgaagtagcaacctaaagttgccctctatggcttgcactaaaggtcgtaaagtaaaagcctgaaaatccgcccgttcaactttagggcttttggattgaaggagtttagaaggtgtaatttagactttaaagatttgaagcatctatagcacttagcgtctctggttcatcaagattcataaattccacgatgatgcataacaatgcaatctcaatcttaaaaataatcttcaaaaagtcagataaaagctttgtcctgtgaagattcggcatttaaccaagttcgaataaagaatcaggaaggtaccggcacctgcgtctttggattttaaagcatattttgtcataaactcagagatacggatccacggtaggaaaatatttcagctgatgtagagattcaaaagcagatattgcatttggtaatttccgagtaagttgagagactccaaaataatcgcagatctcgaagctatcctggccgaatttcatctgatacattgtgaaagctaaaatagcctggtcatgtaaaagaagaatcttacctgtaacgataaagatttttaataattagctgttcgtattgctcacgcaccagaacgagttccgatttggtagaaaatctgtaaaaaagagggtcagaaactaaatcggttagtcaatgagc

tgtttcataaaaatttagcatacttcgtagggaactagagcaacaagcagacatgatgggataggctaaaggctcttcagaaaaacaatggaa  
ataaggtcatctgacaagacatcttcaaatgagataccaatccatttaaacggcttttaattgctccacaaccaaataccatcgaaagcagg  
gtcattaagcgtcgcgaacacgggtaaccaaatacacagagattatagtagtcttagcttgaacagcttggcgccgactcaaaaacctgtt  
tgcctcgttgatctctttaggatttcgatgatttttcgatgctgtgcttcttgcattacttctgtgatagcttctgttggtaacgcctatgaattc  
tcgagagtttcaagcgaaccttcaaagtgttatgtaggcaaggcatcttgcattcatcaatgatttccatgatgagacacacttcgagca  
aaatcatccttctgctggtcggcaatggcttcaagaagaactcatttatcgatacacgtacaaaagattgtaactctaccaaagagctt  
catctagcaattcgagggccgtagatattggacgatactattactaaatagctattgtttacagcaacagtgatactacgtcctcgcggcaca  
atctttcattcatcctcgatttctgaacaaaactgatactgttaaagcctattcttcaaatagttcacgtacattttaaatacgcatttgc  
tccacgcatcacttctcgcatttctcgcctggttggtaattcgagtttcatgctttcaggcgatattaatcttgaatggctactttagg  
atgcccttcttttggagtttagtaaaattggcatccataaatccaacactttgtataaaaacgaggtttattactctccacagatggcgt  
atgtcaatggattgccgaactgtaacaagtctcctaactgatttagcaagtttagcattaatcaaaaacgaatttagcaagtagcgttagctac  
gcaatttaactgtttgaataataattgaaaacaaatacagaaagtctgcaggtgtcaatgtatagttacgagacaatagattatatacaatt  
tgctagcataaccgtataccttaattgggatgaagacagcaagtagtaataataatgaatacatgcaaggcagaacgtagggtaatagaa  
ttagaacagaaggaagacggactataaagaatcaaagatttatcacgggaaacatcgatcaataataatgtccaaagtaaaaaggtaa  
taaaaagaaagacgaatctgaactagttatctatgtaagttcctatttcaaaagcatgaaaaattattgtaacaaaacaacatgcagaa  
tgtcaaatcatcaacaataatggaaggaatcaaatgtcataaactaatttaactcatctttacaacgcttaattctgctaaagcagctgct  
ggattatacacagctctttagatagaaggggaaaggacatagaataaacggtgaatataaagatattataagcttctgcattaaaagtattag  
agatgatattttagcttaacgaagaaaatacaacgacattctgttaatgcttctcaaaatcatgccaatacaaaattgaggccaaaaacgtac  
gaaaaataatttctaaacttctgcccagcagctaatcataatcaagtagaagcatctccgaagcatcagcgttctatcaggaaagtcaagct  
cttcacctagctcatcgcaagcatcggtagattatctcataaccagctcagcaacgcgattctttgctcctcgtgatattttagaaaaata  
aggcgtaaagtagcaaaccttaataatcttctcagcaatcggggtgttaggaggacaagttgctcagagagcatgttttctctctg  
caaaaacgaatttgcaaatcgacaattcaatgtcaatctctttagttgctcctcgtgatctaaagaactacttgatccgttctcggtgaa  
ggttaccatcatataataaaaagagagctgcatacaatctagaaccttaacaaacgaacaatctgttccagatgtcttaatttctgtaa  
atagcagggatgatgatattagtaaattcattatctctatcctcctccatcccaaaaaccgattaatgcaagctgaaactctcgcctg  
ctttatctctaccaacatactgtcctcaaacgtgatgattgaacatgaatgccacactgcattccacatattctgacactaaaacacga  
gacgtagtcatgacactttttgttggagaagcttctcttctcagtgccattataccatattgcttagtccatttaacatccagaacgcaag  
gacgattcattcactcgttaaatctcaatgacaatagcgttctatttagtgcctctatgcaaggagctgtcttctccttggaaatgcttggta  
catcttctctcatgtgatccttggcaataatcggggaatgaagtggttctatcggttggtcatctgatattgtaacagcttcaagcggag  
gaggacctcatataagcttctggttccatggcgaacataggcacttctgatgcatttttttagcttcaatttctggaatttcaatatacgtag  
atgattcggcaaacctgcttgcattcgaatcgccaacatctagataaacgggggaattcgtgattctggctcctccatacagcatcag  
aagagatcgtcttggttcagaaccttctctgcttactaaaggatcatagtcatttctcatttctcgtcaacagcctgcacatatcaca  
agacttatctcaactacagacaagcttattaggatcagcctcagaatttctgctggagcgagattatgatcaaaatggtaaatataac  
agtgttatctcaaaaacagagggtcgtcgtatcggtgcacttcttaactttagcagagatcctagtattgattgacgagcatgttaggg  
gcaaaaacttcttaatacttctcactgtagcttctattgatcaatgtatgacccaaggcgtttttagggttgaagactctccatcattagaa  
gatggccgatcatgatagagctagatttgtgatccttctcagatcatgtcgaatctggccggtagcatcattcaggaaaaatgtccgat  
tttctccacactgacttccgggatataccacatggttctggttagacgattgtccatacagcttttttggcagctttagaggaagactgggta  
acgtcacgatcatttctcgttctcgtctcttctctgatctgttctggatgagtgacattcaaaacaccgatgtatttaggaataaatggta  
acaattcaggatggcagggtctcaatggtttcataaaaagatatttctgttgcagctcaacggcttcaaacagcttctagaaaaccggaaaaa  
gccgatggccaccaacttgatgcttgaaggttcaactggacagtaattggataatcaacattcaatataaaaagggttgcacccggagg  
agaagacgattttaggaaaatgaagaacggggtagacaagggctagtagggcgagatagagagcagatcaaatcaaacgatgcat  
caggaagagaggtaaatgttagatgacctagtagaaggggtgaggaatgtatgtagcgggtgcttggacttggatccttcttacgac  
ctcgagaagctttggagttgctgtaaaattccttgggggtgctcactgcccacattaggttcaagaaggcggggtagagttgaaatgataat  
tttgatgagagtattctgattgatcagggactgcaggggaattctgcttagagaatcattctcaggaactggatgcaaggttattgttggc  
atcattagggttaaaagttgaggactcaaacacgcagtgatttactggcttcttgcagggtgaacgttgggatgctttagattcatttgc  
ccggttccattgaggatggttctcaacatggattgaaggttctgtggtgagaaggagattgacaatgcatacggcaaaatagtgctgaa  
gaaggtctgtaagaatcatgaaaagcagctgttattgatttaggagtaagttgctgatagtgatcggaagaacgctcggctgagcggagcggta  
tgcgattgtcttcaacttgcggatgagacaaattgatacaggggcatgataaatgggggctaaaggtttagtgatgacagatttcaaatca  
gaatgtggaactggtcatttctctacctggagacaggaccttaaggacgctgtaggtttttagcgaaaaatctgaatttcttccagatt

tttcatttcttcgcaaacgaaccgtttctgggcattttaactttccaatctctctgatactggcgtttctgccactatacgaactaggcaggc  
aacactttgatgtgtctgcataaattcataagttgagatcttcgcaaagcaatctctgctataatcccggcttgaaccccgaaactcgtcaaact  
ctttgttactcttcatacagaggcgtttggttggtaagttctttggatcatgcttcgctacgtctgagtaacatcttcttaagtgggggtaa  
aaaaagcagcaacgcttcacatccgtattattgaattacaattgcgttacgtaaacgttataaaccttacctactctttgtattcgtcaaattgag  
attcaagaaaaatgaactctgctaaaagttctaagatatactgtaacagtgatataaaaaacagtaagtttaattcaaaagcattacataatcg  
attgcaataaaacttgcagaaaaataaaaaacgacaccagcaggatttgaacctgcgcgaggagaccgcaatagatttctagtctatccctta  
accactcaggcatagtgctgattgtgtcagcaattagatattccatattagtaagttcaaaagttgtatgagtttaaatgcatctatattcaaaag  
aaaaattacactgatcaggagtagtgaaagcatggtcattactgaacatcctctttaacagtaatgcaaggttcaattggcaaaacactttt  
actgaaatattatattacacaagagcccgttaagttcctatctatacagagacaacctaacagttcgaataggatgaactgttcaatggatgg  
aattctcctcgcttaagttcgtaagtagttacagtagtctaccacaattcgtacagttccattaaattcatgttcatttgtttacaacaacattgtag  
gagggcgacttagcagggacaaatagcaggctatgtaaaggaatcttctgctgctatcaagggattgtgttttgataagaaaaatgctgc  
tacatcgacgagtagaaagtcggttgacaaacgcgagacacacatgttaacaatgttactataaacaatgagtagcggggagctgtccgacctt  
gaagacgtaatggaacacgggccccttaactaacggggctattggtaatgagtaaaagggagcatggtgggtcaaacgaggatagtagcgtc  
cttggccattccattaaaaatctctctataatggacgtttagcttgagagatgagttcaaaagaggaaacgacaaaagctatggattatcacgtcaaat  
cgtcgtatattatcttcttcttgaagagtagcaacatattatgaacaaatctggagaaaaatcgattatcttctttaaagaataaattc  
aagcaggacatggtacggggacacttgaagactacgatagctacatttctactgtgagcgaagagatgaaccttgcgtccgagtagtcatgccat  
tttcttattcaaaaacacttgcattttgtctcaaatgaccagtgcgacttctctcatatagggcggaatcacctttttacaacgaattcg  
ttctcatacagcatgtaattttgagatcaatgcaaatattcaaaaagtcggtcccggaggaaaaataactaagcgtccgtcagctacaaaaat  
agagaatcaagatactatcagctaaaagacaaaaggccatccctagctttcaaccagttcagcctttccgtgtctcccttgaagatacagca  
gcaacattattgtcttacacaacgtttcaatacatatacccataatgattctcggctccaggtctcggatagtcgatcccaattcgtatgctat  
tacctgtggaacggatacaagcatcgcaagaaaactcaaaacttattccatttctctggaggaaagcatcccgcgtggtgtgtaagaatctca  
aagtagacacctgaagcaaaaacaaaatcactgggcatggagaagcattattacagattatgattttaccccctcctggcgaggatcagcttt  
gtttaatgatttaagcatgctgttggctatcagactactatataccaagcgagagttcagttccggaccgttccaacagctgctcaacgactt  
gattccccttctgcaaacccgaaaaagagaataaccgatattgacatttctccagtaaatggagcctagcaaaagtggttacctttatatttac  
tcttctaaacaaataagttgtagtttccaggtgctgattatactacgctcagtagctcatctaaagtagtactcaagctcagtgcaacaagaa  
aaagttggagatttataatagtagtcttctgaatcttctcagaaaatgggtactggcaggttctctatctatagttacttata  
tgaatgtttgaaaaatcatatccaaggttcgttcaatattcctaattttggaatgaaataggctcaaaaaaaaaaacgtttgcgcatcta  
gttaagggctcccaacaaccacttcagtcctgttcttacttattccctttaaactcctcgagagactaccctaaatcaacaaactgcgct  
acttcagtagtccgacgttgaagctgagaaacaaaggcagatgtgcttataaagtgcaaaaagtttatccagttcagttagaatccgatataca  
gtcaggtattggactgacctgtgaaacattgtttgatttctcaattaacgataatccctaaagcccaaccctaatattatgaacatattatcgg  
tcatatgaaatctacccatgttagaaggtttaccgcaaaaaatagtgctttagtgaagatcgaaatggtaagtagtgaatgctgtgagc  
tcaaaagtagcagacgcatgattacatattgtttatcaatgaggttcatgactatagacaatattggttagaatgatattatgaatctataa  
taatcttaaggaagtagtcttattgtgaaagaagaggaatataagaatataaaatgaattaaatgtatgtagataagagacattataaatca  
tgagcaaaaactagatcaagtagatgtagtctaaagaatcataaaagcatgtagcaacctacatgaaatctcaatgctgtgataatca  
tacgtatagcttagatggcgttacaataaatcaaaaagtaagtagcaacaaaataggtactgatagcggcgtatggtcacgcgatacgtctt  
ctttttctttttttctttttacggttgacaagcatgctaaagcgtacgagaccaacagtcctatggcaagaattatgagagggaaagtcg  
aaacctataatagtttctgggtaataaaaaaagttgtgcacataggacagaagaaactcaatcaatatactttttctttcatcaacaga  
aaatccaggaccagtagtaaacgagatataacaggcccaatgatagaaagcgtctggaagaagtagatagcggtaaaaaatcacgatgggg  
actattctagcaatggaccagaaactattgataataaagttggagactgaaaggattaaaaccagtagcggcgaaataacttagctttgaagc  
cgatgacaaccattgtacaagcattccggacagaagatgaacaaagatagtagttagttagcggcttcttcttggctaaaaggccaata  
aacatgaaaataagcaagacacgaccgcaagctggaataagtagctttattgtgctcagaaacggcgggtaagccagcaaatcggttgaga  
cgacgatgaataaaagtagcgtagccacaaggcaaaagtcaccaatgacactaacgtttcggagaacatctcggcgtggaagtagtccat  
aggcaaaagctttagaacagttacaacaaaagagaaccaatggcataggttggcgttctaaacaccaccattgttgatccaatgaacat  
gaggaccacacatacaaaaagcagcaaggagcagtagcgaatcgaagcgcgataatcccgatataagaaacctgttcaggccattgtgt  
tagattcggattgcgtcttcaaaatagtagcaacaataaggaaccgacccaaaatgggcatataggacctaaggagacaaaaaatctc  
cgctgttccacaatctgagaagcagcgtccgaaagttcttctgcaagtcctagctggaaagctgttcataagaatcttgattgaccgacag  
aggaattgtcgaatagtagcagctgaggtcatttctgtttgtatgtcggatgataagtaaaatcctttgtgatctatccctcaattttta  
gtcaaatcccttctcagtgcccgtttgacctgattttgtattatgaatataagggaaagcgtaggttacaatagttccatctcttagctcgtta

ttccatcgtcatataaggaattcttaccxaaatcttagcgaaactccctaaacgaatcggtttgtagaaaggaaggattcaagtcctgaagaaag  
aaaaaacaataaagataatcgctactttatagccattttcaaggatgaaaatgcatcccttaatgcagtttcgtaccttttagccaatagct  
tgaattcaatgtaagcgataccataggtagtaaatgctttgatagaataagaaataagagaagaagaatgcaaattgttgattgattcttaac  
aaacattagccgaccctgaattgaaactggagtcgtaaaacaaatgttcatatataatgtgaccgttgatgatataattagactcgtgat  
gaattaatgatatgtaataagttcaaataagctgctaataatagtcgaaaagtattcctcaaaaacttcattggagatagaacgatgatactattga  
aagaattacaaaaaagaaaggggtggactgttcccatagttgaagactgttttttttcttaatgctttgatcgtagaatcctgttataaac  
aggaagacaaaaaaatctcctgagccagattgaaactagcgaccaaccgggtatcctttaaattacagccgggtgataaccaactacacc  
atcaggagtattgttgattgacatgtcacctattattatgttttttaaggcattagaagtaacacaaaaatgcataaacgaaaaggaaa  
agagaagaaaactatggctgatagatcgtactcgattatccttgaatttttttctttttttatgaactgtatctttcccgctgggtcaaatctt  
gatacctcgtaaaagaagaattgaggtgtttaaactagaattgaaaaaaaaaaaaaaaaaaaagcctgggaaatttgaacgaattatattc  
caattttttttctaatcttacttcataatgaaacgcactacaacaaaaacatccattcgtacttttagcaattgttctcatatagggatcaattga  
tgaacaaacaacaagatgctgtaacaagatcatgagattaatcaaatattttatctgattcattttctagtttcaagattgtttgtacc  
ttttattattattattattattaaatcttttttaagaacagcaaatggacagtcgcatacaaatgcaactttgtatataaaaaag  
ttgaaagaatgagttaacaactttacgcatcacatactctttcatgattcctttactctcctcagtagtattctcatcattatattgaattttttt  
tgctgactacaaattattatctttaaattatctaatgagacttagcataataagcaactctcgatggtgtagttggttatcaccccggctgtaag  
tctaagataccggttgctgtagttcgaatcggctcgagagacttttgatatttttttagtcaaaagccagagaaacctgcatagagcggg  
tattttcaaaagagaaaatagcaactcaaaatctactacacaaattcccgtggtttaaactcctcggttgaatccccactaaagtaacgactt  
tctactacgattcacaaaaatccaggaatacaaaactacaaaataaagtctttcaatatacaagtctacatccacattgcagatttcaaca  
gaagtaaattgtaatgcctttgattattacaacacataacattcttttaagagccaaacgagagcttgaatgacaccggtgaagcttcaatct  
tgcccttagcagcttgagggtaccaagctaaagacggttagtaagaagaatagagaaaattcaagcaacatactctcttctggcagcttac  
gagcagcttctttagagttacggatcaattccataacacgactcatagggagcgaacacagcaacctcagggacgacagagcgaacaa  
aagaagtagcttgcattgatgtcctttacgacgagaaggacgctcaggcaattgacgcttggtcaaacctttccttgtttaaaccacgacaa  
gtcctgggtccatttctgtttggtgaagagcaaaatcttggcgctcattttccctacagttgtgctccgaaaatgcagtcacatgtactgaacc  
ctaccctaaggcaaaactgggtgcagttcggtatttgcataacgaaaccaaagcatgttcagtaaaaaactcaagtcggaattaggtaga  
acagaaagaacagaaccaaggacatactgattttctattctttttgtcttcttaaagggtaatggaatgagaatctctctcctagctac  
gatccttaactctccttcttcatgtgtatgtttaccaatacaacgtagcgcgttctgtacttgataaacaattcatctaagaatcaaataga  
ctcagtcagtgccagagagactgtatactaaaagcgtataaagaataaccaagtagtctctaaaaagaaccaggagctacaaaggcc  
agcgaccagtagaatgattttgaagtaacacatcgtgcaaatgaacctgtgatttacacgcttccagcataaacgattgagcattccgttga  
aaaaaaaaaagaagaggaacaaaagaataaacatgctgaaatatacaatctcgtagtgctgtaggacattcgttatgtggtttatcacgctg  
ttaattctcttgcgctgactatttcatgtatttaccattctgaggtgcttgattcaactgactttcccatgtttgttgaattcttaaggagaa  
ttactcgggcaaccggtcgaaaaaacatcagaataatccaatcgggaaatcaacatcggggtcaccatttaaaaagagctctacggtcaa  
ttgtcaagaacaaattctcctagctcgaatcaaccctcttactgtgcaaccattgttcgaaatcatctagtgaaggaaactctcacaat  
tgtatcttggcgaatatgtgattggatgaatggcttcattgaatggtagtactctaaagacagtagattattgaatgagaatggcat  
agaataatctagcttcttgttcttgcagtagaaggactaggtattatgttagaccttattatgaatccatattcgcgttttcgcatgctgct  
ttcctaatgttagtactctcctgcttcaatttttctgtcttctgttatgaaatttaatacactacattatctagttatgagctttt  
acttatttgaaccctttatgatgttacttctgtctgtagagtagacacatgtccattatgctggcaggatccaagtagtgccttctcatgca  
attataatttttgactaactttccttgttttagtttgattacaatggtagataataaccgtaagcctctctttaccagcactcagata  
tagaatgttttggcctggattgaaaatcgactgcaagatcaaacgtttcccaacaaaagcaggtaccctttcctacgaatttcatgcaat  
tgtacgatctattataacaaatgttcgctatttgcctatataatattgctcattatggagagatccttcattatctttagaagcattggaa  
ctctttttgtcatttcattgcaaaaagaattcatcttttagatcccgtgacagctccctttaaagacctaattcggttttagaagag  
caaggaaatattaataaccgtatttctctatcattccggttattatgatttatagtttctcgtcttcaactttttcttcaattaagttcctac  
ggaacgatccgattttgtttgcatcatgttctcctcaattaccctacttaccattaaaaaaaatgtcttcttattgttttgatgccatt  
catgagcgcctttttgtttttttttttttggatgctccctctcatcagattgttcttccgcaatgcagctcttctgtttactaaaccgctgg  
tttagacaggtacttctatcttggctaaaaatggttggcctcagtgattttgacgcttattatcatgatttcattggttcgattttgagctatt  
ttgtttcaatacctatgaattgtttggattttcattgttataaacgctgtttttgtttattttggttactctactaagacagttcagtaaatcttgt  
ttctacaagtggtgggattccaaaagttagatctttaaattataacatgatttagagcagattaactaatcttcaatttaagaataaaaattctgat  
ttattgctgaagtagtatttacttgagatcataaaggtgtagcaatggcacataaacgatagattttctatagacaagtaagaacaaacaa  
atthaaaaacatacactgattcaattttggaaattgcacgagcctttcgtatcccaatgcaactgtagcttacgaatagcattgaccatgg

gtgtaggtccgcaaatgagaactttggagtcaggagaaggagcagggaagtgggtgcttaattagctcttcggtaacataaccaacggcgcgggt  
ccaatcttctgggtgattattaagaacatgggtaccgtgaatctcggatcctttcagtaaggcttcaatctcctcgcgtagaataatcttctc  
agagacatttgcatacaaaagagtaatttgagtaggatcttcagggttggaaagaacagcacggataatgtgaagcataggagttataccagta  
ccccagcaatcataccaagtacgagcaagaccaactgatgttccaattgccttggggccacggatgccaattctatcacctattttaagt  
tcggaaatcttctactgacaacgccattgggatatgccttgacaagcaaatcaagtagcccttatcaacatctgaggacaaagggtataaga  
tcgggaatgttctttccatccacctaacaactaccgttaaatgttgccaactggcaagccaaggacatcgtagagcgaggaagtcggaagc  
gataaatggcgggtgttatggtttaagacagctttgtcgtcaattcaagtagttgaatcttctgttcaaaactcttgaacacgtccacgcaaaa  
cttatgaaacctaggggcaaggcaagtaagatcgagatcccatccactcgcgttactacaaaagttccgaacacaataaaaatgcagga  
atatataccatgtaaaggagtactcaatagtttctcgcacatcttagcttttctggatttaacaactctatttcatgttagcttatgatctggt  
aaatactcatatcagatgtcattcaatcagctaaaaagccattccatattaagaaaatttcttattaaggaataactaaagattgatgccgttc  
aacatatctacatgttacttacttatgaacaattggtagtaagttcatatcttaggattgccttaagtagaagtgagctctcatgatccta  
cttaaaaaaaaaactcactcgttggaaatatttactaatttgcactttatatacaataaaatttccatttgaattcattctctataacctg  
aaatgaaagcatgctgtaaaattctataaaacaaaaacgaaggaaagtagcataaagtatatccaaatgaaaggaatatagcctttgaa  
agcaaatagagtctactcaaaagttgtctgcaatcttctaggcaccgaaaagaatcgtttaccgtaactaaataactttaaactactgatgt  
tggaaacagatagtgaaagtaactaaagaagccttcagagctccaagaactcctcagtaactcaagggtatagacaatcgacgtctacct  
tgaaagaaacattttaaagctacaagtaacaaaagaacaggtaataaagaagaatccaatgctgctttcaatcgtaactctgcata  
gcaaacgatactgtcggcgtgtacaagccagccataggatcccagtagaagaccaccatcggtgctattataaataatgaatgttttaagtaa  
caaaggcgcctgtattgccttaatgcagataattgttctcctaaaccataaagccttgaaaaagttatacatagcgtaaagggagatttca  
cttaccatcccagatgatcattaaccaccaccactgaaagccacaagtaactccatcatgacctccgcagcaagcttttctgagcaatggcgt  
cttgcataaaagaggctcaatcttaggaagcatataactggcatttgcgagtgacaccataaatcgagcaaaaaactttaaaggatgttg  
gtcatagttacaggagccattaagctcacaactgggtctgataaaacatcgttgtaaaaggaatcaatcgcttatttacaacacttctgt  
ccttgttctcagattgacgatcctgtctattccacgttagaagaagaataaaaaaacgtacatgattatacagaacgctgcaccgccat  
gtacaagcgcctgttaggtccactcggtagttcaatggaagagcagttgtctttgttagtcccgtaaaaaacggtaaatcctcgtgaaca  
aaactactttgatgtccaattgtacttttctggccattgctgataagtgctgttccagtagaagcgcgcaatctcgcagcaagctgaaaaa  
aggcaccgttcttacggaattttatagtcgaaaccagaatataatctgttatttgcctcttattcctcatcacattactaccgtcccagcgt  
taacctgttggttaaaaacagattgagccagttctagccattgaggctcatcagcgttcggattagaaaaattagcttctgagctgaaattgag  
cgagaccccaaaaagcctgatcgtcttaccttctgaggtgaaaaattagaaggcatataatcagaatcttaccacttgatataacatgctcg  
tctttacgagatcattataggtgaaatccagtagataaatcttatttaaagaccctgaatagtttagatcggttctgattgtaaatataatccg  
tacattccaagcagcactgcttcccacaaatcgcaggcggtaaaaaactccaatggctccctcttttctgattccagcataaataattagcaac  
ccatcagcaactacactgagcttcatcaacggaagaggtatcattgggtctaatgaatcccttgatacagagaaacgaaggaaagaga  
gtaaaaagattaatagactatacatgtttttatctcaaaaagatgttgtaaaagactcaaacatgaatctaactttgtccgatatgatacaggat  
gactcaaccagatgtcacattgaaggaaacctaatctgaccattcttctgatgtcctcaattacagaagaactatttctgattaaaccga  
aacgatattcagcacttataaccaaaacagcatatccctactacactgtagactcggactcgaagattctttgagtaaaacttgtgtaacgtta  
cagatgctactctgtaatgatacaagaagcacattagcgtgaataagcttctgctcaatgatatttctgatgttggtgaaactctatttctgagctccgct  
taattcctcttttctgttttggtaagatcacggctccctcgtttctaattggcagttgctttataatcccagatagattcaatagactctga  
atgtgattgacatttctcaaaaaagatagacagaaggattcagctaaaaggtagatcaaaaattagttcaataaaatagtgtaacaatcgtacc  
ttcaatatacttcttaatcttaggtctacctgttaagccttccgattcacagtttagcactatttcatagctttttacgattaacg  
aatgcatttaagaagatacatagcccgatattttaccattgtgagagtgatcatatctctgtctatgattaatacttgatacaaacgaaaaatgg  
gccattataccttatatcgccaagtacctaggagtcgaacgaaatatacaacctatagctgtattgcactttgtacacttaattccggaatatacg  
ctgaattagtgtagtaattgctagtaagcatttttgacctacaaaggccatcgtctgagtccttaaaagcttcaataatcgaagatatttct  
gtaagtctaaaaactatgttaaaaccagtttctctaaaacttaccactcaatgtaaagctattcatttccagatgcgatatcccatgattgga  
atcgctacaattgaaagacgtttttacattgaaacaccgttggaggggattcaaaatcgttatcaacactttctacagcatttctccgcttctg  
acattgtctatattgggcataatcaagacagttctgtgtcttagtctactaagagaatgaatactgactaagatagaaacgaggtttaa  
cgtttattatatttcttataaataatatttattcataatccttaatttcttctggaaaaagtagatagcagcgtcgttccagctcctataagt  
tcagaccatttctgtcatctactcgaagcgtcctgtatatttatcagtcactataaataacattttgtaattttcatagatatatagggaagtc  
ccattagtaagtaactggagcctgattgtaagtgttggtaacttgaccagcttccaaaccaatggaagctgcaacagcgggatctggctcttt  
ttcaaggattttaaacttggaaacatcagagacgtagcataagcgtcctgatgaccaaaaggattctcagcttaggaaacgcaatagttaaagca  
ccaacttagactgtacatctgattaccaatctcagtagaaagatccgaaaacggctattatattagcaaaagtaaaatctaactagattaaattac

ttacgggagaagtgaaagttgatttctcgaattcgattagcagcacgggtacctcataatgctccagcatagcttcgactgagaatagagtc  
tccgctacttaacgactgtattaagtcacgtatagacttctttcaacacaaatattggggaaagcacataatcgccaaccagtagttgacagg  
gaataacagagaagttgttccatgcagtagtgacggcaaagagcttcgaaattctcgaagatccaccactatctaaacgcgttagtatataat  
gaacagcgctttctataccttggttttcatttgcactgaaacatgacctccaccagcaatgcgtgtattcacatttctaaaaacttgttctcg  
gccttgaatcgcttatttctcctgtaagaacaacagccatattcttaaaaaagattagcgttaaccatttaatttctcaacttactgatcggtcac  
gaattaacttgaaaaggagctttttcttctaacggtataaaggacttttgttctcaacggaccctccataatataaaagtataactcggttg  
cttctgtggataggttagctttatacacttcaatacgccggataaagtcaggatcggaatcgaacatgataataaatcgggcgagactattta  
aaagaagggtatccatttcataattgtatgtataaataaaatggaattagtgctcactcagaacctcgaagattcatttcttctgtgataggtt  
gacttcgatatttgagagagcaactatattgtaataacgttaaacgacgagagagatacacaagcttttccaagcgtatatttgggagaatt  
atcttgagccaaattgcttctgtttagaccgagacgagctatgcctcctccttactcttctcgttttagatgcaggagcacctttctgtagtt  
tcaggggtgtttgcttctttagaatttcttcaatctgtcaatcgaattactcatttctatactgttcagccagtggaagtagtccatcagtc  
gactgttcatcatttaaggactctttagtgcgaatgtatagcttaagtaatctcgaattgtaagcaggctccttcttgaacacattataa  
gaattgagttcgtgaaaattctaaaagttagcagtaggctttcatgaaaacataaccagggtcattgctttcatggagatatttcatggctaa  
tttcttcaaaacatcgcgcaaaacagaccacttcggttcttcttaagacaggataatattcatccatggatccagttggagaacggtaaacac  
gatccctagctattcgaatcattgtatttgcggaatcaatagccatggtaggggttagcattactggaaaatcctccggtgcaactgaaa  
gaatgatagtgccaaaatcttcaggaagctgacgagctgtaagaaattagtcattcaagaggaactttaaggtaggacagatcgctactaat  
tgcttgccttgggactcacgcggtgcaaacggatccagttgacgacgaatagtcacatcaaagctcctgtgtaaggcagaatcgatgttccat  
tcttccatgtctaggaagctgagttgatctgcgaagttctcgaacggtagcttcaatacaagaagtagacaagattgaattgacttctgagaat  
ctgtaaagtcaacatttaactcaataacatccgctggtgcttttctaaagattcagttacatcaacatgaaaccgaggataaataaagacatggc  
gaagaacatgatctcaaagcattgctgagagcattgattccataaaaaatcgttctgggtcatcgctaaaggccttaaatgaatccagtttgtt  
tttctctatataaccgtataatgaagcctctgttccggtgaaacaattctgaaaaggctagtttagtgaacagaggaaaacgaaaatac  
ctgtctgatgcagtaatacagaccagtaattgttctgtgggaattatagtgcaataaatccattacaaaatcctgctggttacagaaaa  
atgcctccgcttgatagcttttctctataatacaagagtcagcttattaattgaattaatctcatgaatgatatttcttaccgttctgctacg  
gacatagtttctgtttacaattttagagtttttccaattccttctcaactctcgctgcatttagttcattatcattagaattggctccgaccagca  
agactaacgaccttgaacggcaaaagtaagctagaacatttgcgaatttgaagtaaaaggaaggcctggtccataacacagagtcctgctc  
attgataactcattaaaaatctttttggtaggagagtgtaaatggataggtatgtccatgttttgaatcgagaccttgaacacaatcag  
tgcaagcttttaatacggatcttaagtccttcaaaattgtgctttgagcaatgtaactgttcatgtattctatagaagctgttaattataatta  
cgaaggatacttgtaaaacttgggttttaagagaaatcttaagttttaccggtatattggtaattagcctgaattgttcacgtatgataaatac  
taaaaccgggttgcggataaatacttttaatttcttaataaattagtaaaaaggctagttttagtaccatttagatgccaccatagccttctcatct  
atgagattcctgtagcaccgaactaacagagaaccactacatatacatgtcaagagatactcgatcaaggtcgcgccaagacgaccatctcat  
agagatcggtacaattatagaagctcaaaattttagatcgtatgacgatcgtcgaagttccaattacggtcaccaaagtagatcggattatcat  
agatcccattctatacgaaggaataatagagaggatagctggaagcatgatcggtacaattacgatgataagaatgaaagaagaagcgagact  
acccttctagcaggagctctcatcctcaggtataatgctacctgactttagaagattcctctcgcaggccaaactatgtaactgcttctgaaa  
aaaattctgaagagagaaaagaacaggagcgttccaaggagatctcggttgaccagcctgcaaaaacagaacgcccaccgctcctccttc  
agcagaaaacaaatgactcgtctgaattatactaccattaataagccccgttctctgatgaagacaaaaaccgaagataaggtatcagctt  
ctccgacaaatccgcttctgatcccaaaatccaaacacgattggaaaaagtagctgcttggaaaggaatcaaaagctgcacagctgttaataag  
aaagactcaaccgctgcaattaagcctcctcataatctttgcaaaccgacaaaaacgctatgccttctaaggggatctcgggttgaactagga  
cgcttgaacaacaataaagagcccaaaagaataaatcgctgcatatggatgatgacgatgacccagacgactgaatttgaagattac  
gaagacttatgggataaagaagacaggggaaggcatacaagctagctcaaaccaactgcatggacgaagatgaggttgacctttagatgctt  
atatggaatcgcttgttggctctactgatacagttcgaccaggtttattgaactgaggtcattgactctcatgcaaacgaagatgaacgtacaat  
taaatcagaaaacttggagaagaggagaactgtctgcttctccgctaagcgtcaaaagaaagaaagatgtaataagtgatgattcgcgaaa  
atgaattatgaagatttgcgaaaagatttctatgttgagcctgaagaactcaaacatcttactcctagagaagtcgatgaattgctgcttcttag  
aaggcatcaaagttcgtggtatagattgcctaaactgtcaccagctggagccaatgtggattatccgcccacgatggatgtaatacaggc  
cttggttacggaacccaacatcattcagctcaagcaattccggctatttcatccggaagagatgttataggcgtggctaagacgggtagtggt  
aaaacaattgcttcttcttcaatgttccgacatattcgagatcagcggccttgaggaaatggtgagggccctataggtattatcatgacccgga  
cgcgtgaattagctgtcagattcatagagaatgcaaacctttgcaaaagcttgaatttaagggtgctgtgcatatggaggtgagcctattaa  
agatcaaattgcagagttaaagcgtggagcagagattgtgtgtgcacacctgtaggatgattgtatttaagtccaatcaaggacgggtaa  
ctaactacatcgctgacttatttggattggatgaagctgaccgatgtttgatttgggattgaaccacaagtaatcgggataataaataacgtt

cgccctaaccggcagacagttctgttttctgctacattccaagggcaatggaagcttagcttaggaaggtgtaaagaagccaatagaaatcac  
ggcgggaggaagatccgtcgtagcctctgaggtggaacagattgttgaggtcgcctctgaagaatcaaagttatgcgcttttggacttttgggt  
gaactataatacaaaaggcagatgtccgaactttagtttgcgatagacaagaagctgctgatgctttgtcgtgatttaatagaacgtgggt  
ataccagcaattcaattcatggaggaaaggaacaaaacgatcgcgattctacgatttagtatttaaggcaggtgttttgacgttttaatagcta  
ccagcgtagctgcccgtgtagatgtgaaatcattacaactgtgtgaaactatgattgtcctaatacatggaggattatgtgcatcgattgg  
taggacgggtcgtgctggtcataccggcgttctgttacattcattactccagaccaagaaaaatgctgtgatattgcaaaagctctgcaatta  
agtaaacagcatgttctgatgagttgcgaaaacttagcacagcaattccttgaaaaagtcaaagctggtaaagaaaaggctgctggtgggtggt  
atggaggtaaaggctgtctcgttagatgaaacaagaaatgcagagcgtaaaatgcaaagaaaggcctacggcgaagatgttgaagaagaa  
caagtcgaagaggagcagctccttgggagaaactgctgctgaaaagtctactggtgattttacacttgatagagttcgagcagcaatcggtggt  
attactgctcagcattaagtggtaaaaaggacaagcaataagttgacacaacctatcctcatcaaaaagtatacggatgagtttaagc  
gaagatggaaattaatgattatcctcagcaagcaagatgggctgttacgaacaatgcaaatattatgcatgtaacagaattgactggaacgagt  
attacgacgaggggtaactttatctccagggaaaaatccagaagccggcgaggagaaattgtacctgtggatcgaaggccatctgaattggt  
tgtagtcaagctgctcactgagctcaaacgcttcttttaggggtgtgaaacatagcctcgaagggtccagcaaggctgctcctaccggcgttat  
acagttgtttaattacctttatattttgtatagtaatagcttctgttcagataataaaaaagggaaggttcttgagtacaaagaaataccgaat  
ccgataaagatggtttcattatattacttttgatagaatagagcaattgataacctccgatacctctttgtagctcactgtaccagttttattgcac  
aaaactataatataacgatagaattacctaagtgaattcagatttgacaaaacaaataagttattagacatccggtgatagttcagaaaagct  
ttcgataatattttctatttgagccaatattttcacctctaaaaggcaacccaactcgtcaatttgggggtgtaaataataccattgaatcataccc  
tactctatgcaatactgacaacccaacttctgtataacatattcttttctaatacgtgtcagatatctaacggaatatctaggatgactaaccaa  
actgctctgtcaataatgagtcgactgactcagatccagagaaatctgtctattcaagatcttacctggaacagctgttcttcaaatgt  
tctaataatagtaataaaaaaaccaactcccaaccaattgcattacttttttttttactgtattccagtttgttatattactatattgggtgtt  
acccaggtaacgaataataatgtaaatatataatcgtattctgaaagcatacaggctgcaaaaataagattagtgacttaccgatcacgatgt  
actttattgctgactgtaccactcgttatactacacataaacattcctacgagtaaaagcttgacggttgacattgctttccagggcgaaa  
atataaaattaggtaaaaatgggattacaagaagaacaattgattattagagcttctggactatcagaagatgcacaagatgcagacattc  
atcgtgcatggaggaaaacatctctaaagtacatccagacaaaaatccagatgatccgatgctgctgacaagtttcattgtctacaagtagcct  
ataatgcttaacagatacaacaatgcgtcaggcatatgatgctgagcattagccaagcttgctcgtcaaagacgcaagaagcatttgatctg  
aataggaaaaccatggctgagaaattacgggagagagaagatggatttcatttttgaaaaacaaaagatcaagagaacaatcgtttacgg  
gaaaagttacgttcttacaagagcaaagcgtaggttacgacgagaccgtgaagagagactgttcaagacaaggattcaacaagagaaaa  
agagaaaacagccggtaaaaactcgggtcatttctgacctgatctgtaaaaggtcgttggagaaaaagatgctgaccaagtggtatga  
atccttctacgttcttttactcaaaaattggacaaattaacgatgttataatcaaaaaactgttaacgatgataaaaaatattttacgcaattc  
ttgttttgatactctggtgctgcttactctgctgtaacagtagaatctcctctgctcattaaggataccaatggctaaaacctttatcgaaaggg  
ctgagttgaaagaaaagaaacctaaaagtaactatggattacgaagaactaacgatgttgcgaatgaaacagaacaacgcgaaagggaaaca  
gaaagaaaagccacaatggctgagactaaatttaagcaattacaatatggctaaatagtagaattctctattgttgtaggtttgagaca  
gaattatggatgacttagattgcaagactaggatgtggtacctccacctcactgaaggtaaatctgatggaagtttctgaattgagtcagactt  
ttccaatgaaggtaatgctcataatattattgttaattcgtcaaaaatggataggaaaggggactcaattgctcttcaaggcatattcatgaggt  
gccattgataaagccgagccttaagttttataaacgtaagaagcaaaaagagaacaaataaaaaattttgctaacggtcaaagagctacttaa  
caacctcaaccaagtttaaatgtggataccgatgcaaatgtttcatttttacctgctgaagaaggcctgcttctgctgacatattcaattggaa  
acgttagccacgtgtataacggcatccgagttcctcccaaccagaggaaccattaatgctgtcagagtggtgttccatttgcgtctgggatgt  
gtttgctgatgactggaggaatacaaccaagctcggcgggaaggcgaacgaagtttttagaaaaacattgactctcccaaggaaactggaa  
agtgtctcattagaggaaaaagctcgctacaagaattacctcctcagttacaggcattttagacttttagaaaaacgtctgcaacaacagggcaa  
taattaaacgtttaattatgaaagctatggcggttatgataataaatcttttatgaaagaaatattctatctgtttttataattgccgcttgc  
tactggcaaatgaaaagagaatgctttaaacaactcgaacaatcatttctattctgacgtaagcaacaagaattgcgttagtaaatggtttgtt  
ctctttatgataaaactaaatatagaacagaaaggaactgaagaaaagctcaatacattcatcaaggtctttcaaggatcttctactttcgtacc  
agttgccgttaatgaatctgggtgggattgggaattgataaccaccttttccagccattcataatacatttctgcttccactgcttagacaagt  
ctgctcgagatatacgtatgcgaaatgtgggtttttaaagagatcaacatagcaagcaggtgggataaatgataaaactttacatagtcaggtt  
ctctcaatattccaagtattcaaaactgcaaaaatgttctcctcgaagatattatgctgagcaaggaaattcaaatccaaggattcgacag  
catttgacaaattccaactcaattcaaacgactctttcatccggtactcgagaaagaagcattttggttcattgaaaatactgtatcttaac  
ctctgtacttttctgctcagaaattcaactcctcagatggaacagaccaatagccatctttgaagggttaggtatcctcataacactgtgttaag  
ttttttgtcggttaacagttattcggtatttggtaaaacaaaaggagctcaaaaaagtgctgattgaaaaggttctatggaggaaagag

gaaaaaggaaaaaacccgagaaatggattactatccccacgcttcaaaccatgtgcctcctttctttgtattactgttctgaacaaactattga  
ttgaaaaatatctcgcgatacatgcaagtactgtttctctgtctttactaatgtttcattcagtaacgtaaagactgaatgcctcgagt  
ttgtgctatagaatgttctaacaaaatttgaacaaagatagctgttgcaaacgagaatgttaattaaagattgtataagtataaagaa  
taaattatggacatatttattacctaagaacagaaaaggctgctgtttacatagttagctgatttacttctactcggaaactaccactgagcag  
aaaacagaacgatttgaacacataactttttttctgcaaacatacttcttcttataattattaacttaactattttgtttcattgcaggtttct  
taattgaaagccagttgttaggagtttgtgaatcctcaacaaaacatcgcaatttatgctggaaggaatctgggttaattataaaatatttc  
gtaatgaaagatctgatttccattgttctatttggcttactttgttactactgctatgctgctaccggatgtctgtgctgattatgagtctcaattgt  
ctgtcatttttaggaaaaattatggctttctgaactgaataacgatttagctacaagtaagtgaagcacttctcctggagcgactgcca  
caaaggtatacacgatcactagtgtgacacatgtttaggaacagaaacaactatgtatcagccttacaggactataaggggctacctacagac  
gcctattacaattgccatcctcaaaaatatttcaaagtaatatgcctattgttcttactcctgactctcggtgggttaaaggaaagccctatag  
ggtaggtgggaccttatttttggggtggatgaattgcgctgtttgtcgtatcagaatcattctggcttaattgctattgacaagaaaataa  
aaaataaagatggatgactgttgaacatcaattattataacgatcggcgaatcactaacacaattgttaggagagattagataaaagcaagc  
gataaatggctgcatgatgactttgtcagaacatgactgttaacctatacaaaacaaggggaaatgtacattctgtcaggtcctaatac  
actctggtaaaatccttagaccctcatgagctgtacatggaagaccaagaattttatgacctaagcgttaattgaaggcagctatagctgttct  
agtatcttctgggcatcactcatgttactttgtatcacacatcgaagggatactggagaatcttctgctaaaatcgctatacgaagctc  
aaacgctggttatggaattcggagaagcaaacgacagcgtatgctggacgaccaactgtcggccttcttctagaagtgaactgtatcagcag  
attccgaagcgaagagattttaacccccacttaaaaaatgtattaaattggaaaaaagtgtgcttcatataaaatcggatcaattcgtct  
tcatctttcaacatagacatacaggatcatagcatgccatgccatattttctcgggttcttttaattctgttatacgaatcttagtat  
tgagttatatactcttagactttcattatttttaccagtctgtcgcgaaaggaaagcgtcagaggcaaaactccgcacggccgcttgact  
tttctgaattgcattttgtattattgtcacaacaaaaaggaaaagcatagagcagtaaaccttcatataaatgaaaaacacactactccaatt  
ctcaaaaataacacatacggaaacaaatctaacttttaattcctggtgaagcaataaaattatttcaaatattgaacatcaaaatgag  
aagtcaggacaaaatattccttcaaaactgctcatgccataactgaactgttctttttggcttagcaatacatatcctaaacatatac  
aaaaaagtgtcaagaatttgatttttcatgatagttcattttgtcgtgaaaccgttttgaggacgactgttaataacatattcttttctac  
ccaacattcatacattatcaacgacttaagaagaagaaaaccaaacccctttatacaaacggtgaaacaatgcaaggttgggttctgaca  
aaagaaaagggtaccagaagaagatccaaactatcactcctcaatctattgaacaaatatcgtctttacaaaagaagataatgacat  
tgtttatccttaaagcaatgattgggagcccccaatgaagcagacatggcaattcaactttgtgtagactaaatttcatccttgaaaatcca  
tccaaggttttcggacggttgatatacgaatcactcatggatagacagaaagtcagatagcttggcgagactgactgctcaaaaggagcatt  
gtcctctcaagtcacttatacagcgtgatgtaccatgtggggaactcatcattcaaaaattatggatgaattttttaggatgaatcatgca  
attgtgattcatacagctaacatggttgagccgactggatcggatgtcccaggctatttcaagacaccgctgttgtttccaagttaggagga  
atacatctagacatggaactactaattggcgaagaagatcattaagaaaaagggtgaagcaggaagaacaaaacaagtagaagttgtgga  
cgtcgtgcccgaacgaagacgaaagcccactagaaagcgaatgactcaagtagggcagcagttcaaaaagattttctggattatctacgg  
aattataatcacaagaacttataataactagaaaaatagatttttcaaatgtccgcgctgttttctcgggtctgtaccggaaagttat  
gggtgacaaggaatcgcaatgggggacttggagactcaagcatgacttggagaggttgaaaaaaggaaaaagaaaggtgaagaattt  
ttgacacggatgtctgtttcacaatgcagctccatgggatcgtttggctccaagcaggaataacttagaggaattaatggaagcttttctgcaa  
gaggaaacaatggaagttattttccaacggtgaatcaaatcaacagtcgatgtgggatggcagctggatcatcattcatttaacatata  
ggaaaagacaagtaggagcaagtcgagatctgcgacaaaacataattgcacaagtggggatcaatgaaagctggaagagaacgaattgc  
accgcacattaaaacgtaccttctgttaagtgaatcgggcgacaggattcgtgggacttagtacaagtgccaatctgagcaaacggcatgg  
gggacgatggaaggaaggcgtaaaatccaagacagctcgtgttaaggattaaatcctatgaagcaggcgtactattttccgcaactatt  
cgagagtcggggacatgattcgtcttttgcagtaggtaccgacttcaaaaaccaattcaccgacgtcgggttattaccaacgtgaaag  
gcataatggctcgaatctcagctactagttggatttcggatgagctgggacttccaccaagagatgtgccaaggacgaaatttggctcc  
tgtagtccacgaaaggagaaggattggctaggatatacatggcctcctaattggaataaagcaagtagccctagagaagctgttttagtgagg  
agaatttggcacaacgatgccaattgaagacgagagtaattcattactaatgaatacttttcttagttaaacaagctaccttatctgtgcaat  
tgaaaattattacaactacttttttttttttttttttttttctgttagctttgttttgcattgtctatcagcgttctcataggagctacaccatcc  
ctatattcttgagctaataccttctatcagaaggacgaaccttgcctgctctagtatacatcttgccttctttgatcatctcagctttcattctt  
atccctcaaaaattcatttattacttgaaggtggaattctcatagtcaatttagactactattaagcagctcggctcaacaaactgaaatgcca  
aaacaggtttacgtaaaaatgaccgcaacatttaacaaacctacgtaaatgaaggaacttacttgacgcaatttagtcagcatcaattc  
gatgattccaattcagattgcttaactcagtgatcgttggctgagcataccaagtaaatagaatattaactaactgttattcatctattcacc  
tgttaccaaacgcttagcactgcccgtttacaagtaaccttcagaccctttcgtctcactagatataatgcaaaaagatttcaaaaactaataaagc



aaatttctgtttaataacctgcttttactgttcgtattgcttgagatcagtttgatttttcttctggaatctatatttacttctatatccgaatattat  
tgccgattttttggaagactgacaagtgcttgcattgattcattgaagaagattgaggacatttatcatggccaccacgaagaagaacatgagcgt  
atcccagcaggtgatccctactcttctcgtcgtcctatccctactatcccaaggttcttctgtaaagaaaagaacgtgaggacgtacgagaaaa  
caaaaggctgaaaagcatcgaaggaatccacacaagaagaactgttgatcctatcactcagcggaaacgttgagatctctgatattaaattgg  
tagccaaaagcttatgaaaatcccagctacactgtaccaacccaaaacattcaatctgggttatccgccaagcaagccttatttgagccaa  
atcagctcaatctacctaacaacaaccaagacgaccttgaccaccagaggcacatgatgatattactcgagatgtcccattagcgtgag  
aaaaccaatattcttttctcctacgcccggcgtcgatcttctgacgtttcaaaagagattaagcaaaaaaacaatcactacaccctgttttctt  
cttttacctaattatcacttggattttcccactccattattctttccaccatctttccatcaccgcccgtcttgcattttttatggatggaacac  
gttcgactgttgctcaggccgcaatggggcgtgaacagaaacgcggtgaatgcccgtctcaatctcacaactgaaagtgcgaatggat  
gaatgatttttaggaaaaatctgggtctcattaaccagaaatcttctccatcatcgacaaatcgaagatgtatggaagcttccatccctt  
cttttaggaaaacgtccgaatcgatcttttagcagggttctcatccagtcggttatctctattcgttcgttaccgcccagcaaaaccagcac  
actttaaagatcatcaacaacccaaagatgaacacaaagatgaaccagagcagaaagcaaaagatattacaatctcgaagtttgtcgtt  
accatgcgatgctatcgaagtaacttcaaacagctcgttccaatctacatgctgattgttttctctgtataaaaggcaccgttgg  
atccctctccccatctgggtgaaattaaaggttcgtagccagaatctgcttctgttgtagctcatgctgagattcctttctgagaatgttacc  
tttccctgatggccttccaaaattcatgttctcagttcccgttgcgaaaacggcttaacgttctcggactcctttgatttccaaattcgtta  
atgactccatagcagctcggccaatgagatgtcagtcacaaagaatgacatagatcgtcaaaaatactcctaggtgacggcataaaaa  
ggaaaccagtgcattggggtcattcattcatattcagaaggcggagggttaagcaaacaggatgcaatggacttccgatgctatcac  
catcagttatttaagttggcaaacattatttctactcagatcgtaaaacaagatttgaatctgttggatgagcatgctataattgccgtgtt  
cccggaacatattaaagcgggtgaaaaagctcctgttgaacttgggacagtgatcgtttagtctctgatgatgtggtaggacgtaccaaaattga  
gttcatacttctcagaaatccggaaaaaactattgatcgtcgtatgaacttactggcattagtgaggagacgtctcttctggacatatat  
tattcaattgcttacttccgaaagcagatttagagaagagttgagaactggtagcatgatgtttccattccccgttctcggagaagatctac  
ttccagaatcctcaaggactctgagtacaaaagaaggacgcccgttctcacacagctccagattcagagtacccaagcggcatattgcat  
tcatcattcatcaggcggtaacctagaaatcactcatcctaaggtaacacaggaaaggtcaaaaggagcttaacaatactacacctcagcag  
gtaggagatacgaagtcagaagaaggtacagacttacttctcatatgtttgttggatataaatgatagctggtttataaaacaagaacaaag  
gtttattctcaaatccatctataatgctggaagtgaaaaatttattagggactggagaagcagactatttctttactgttcgaaatttcgactt  
cgtgaacatgattctattctgggtactgtaaacatgccaattgctaaaacgttgacgagctttcccaactcaccaaatggatccgattgaaggag  
gaattggattcggtagcattcgtttatccattttatccgaagtgtaaaactcaaatccctcgaatttattgggatgggatattggtacccttgat  
ttattgataggcgttattgtcgaaggtatccacagtgctcaaaaggttaacttcttatgtaagaattcatgttggcgtgctaaaaggtaaccgca  
aaatataccaactcggatttccggaaaaagttgcttgggatgttcgtagcgataatttgatgatgcctcctcaaaaaccgttatagcacgccgta  
gttttgaatttcgaaatcatcttcgaggaagcaatgttttgaatcctatggcgttggatcttgggacaacgaagaacgactgtcgtgta  
ttccatcttttttagtccaaactcgcacgcttgcagaacatgattaacattaacgatccagacaagattcaaaagctcgaattatcggttat  
ttgacgactactctgacttcaacgtggttaggtgttctcacgaaagattaattagtagtgatgatagcgccactttgagacgtatatga  
gcttgcgttctcaaggagcgcgaaaaggatacgtgaaggacatgagtaatcctttatgacaattaccttgcattgaggatgagcatcctgcat  
caagagtttagtactatggaacacgaggatgaaaataccgaaaatgaaagtgaggaaaacccaaactgttagcaccgtcgaactcaaatcaag  
cgaacggagtagaacagaccgttacgcttgagaacaatgaatttaactcgaactacagatggccctactcgtgattaaacctgacgaaaa  
gattttgaaacgagaattcatctcacttggatcaagcagaacccaaaataataatcatactcaatctttaaaccagcaaatgttctagacaaag  
caagaagaaaaaagagagggtctcaggtcattgatgaccaagatgctgaaacattgagcagtgaaatctccggtgatgagcaagaacgca  
agttacttcatagggacgacaatgagctggaacgtcgtatgcatcgggaatctacaactcaaaagctgtacgtacgggcaactgggtaaaaga  
cggagcgaatagatggagaagtctgaaaagcgttcagcttaaatggcgtgagccagatgtgaaacagaaatccctaaataaattca  
aaaacaaacctacaacattcacggttatgaattcttctcatgatgttatgactgcaaaatctagaaagcatttacgattacaatgaaatgga  
caactataagttttaaactcattaatgtaggtaccttatttacttcttactatttaaccttctcagcaagtattgggtactgtaattgactt  
acacattattttgtgatattcgtatagtgattttcaaatatcatattgaaacatttcgatgattcccgaactgatgaaaaaccagtccc  
agtaagtcttaggtagggttatatgatacagaacagacagaaattttgggttgcgaaacacaaccagaaccaaccacgcccctccaaatca  
gttgcaagatggtcgttcacacctgaggaggctcgcaatttgatggaaaagccatcgaacgtccgtaacatgctcagtgattgctcagctgat  
cacggcaagtctactgtgactgattcttggttcaaaaagccggtattttctgctgtaaggccggtgatgctcgttcatggataccgctgctga  
tgagcaagagcgtggtgtccatcaagtaactgccaatcttctgttctgagatgtctgaaacacatgaaggatgtcaaggaaccacta  
ctaccccgacttttagttaacttgattgactctcctggtcagttgacttttctccgaagtactgctgctctcgtgctactgatggtgcttgggt  
gttgcgacaccatcgaaggtgttgttcaaaactgaaaccgtccttcgcaagctttgggtgaaacgtatcaagcctgttgcgttgaacaaggt

tgaccgtcttctgaactcaaattccaaggaagaactctacaaaactttgctcgtctgcttgatccgtcaacgtcgttatctctacctatta  
cgacaaggctcctcggtgactgccaagtttccctgatcaaggtactgctctttggtccggctccacgggtgggcttcactattcgtaattg  
caaccgttatgccaagaaattcggtatcgaccgtaacaagatgatgactcgtctttggggtgaaagctacttcaaccctaagaccaagaagtgt  
ccaagtctgctgttgatgctgatggcaacgaaaacaacgtgctttcaacatgcttatttggacccatctaccgatatctgatgccgttatgaa  
ggcgcgaaggacgaagtttctctcttgaaccaagcttgaggcaacctcaagcccgatgagaaggaactcgacggcaaggctctttgaagg  
tgtcatgctgaagttctgctcgcctgacgacctttggaaatgattgctcctccctcctccaaggctgctcaacaataccgtgctgaa  
ccttgatgaaggtccatgatgatgagtgtctgttgattcgcaactcgcgacccaaggctctcttatggctacgctttcaagatggtccc  
acctccgaacgtggtgcttctatgcttccgctgcttctccggtactgcttccggatgaaggtccgtattcaaggtcctaactacactccc  
gtagaaaggaagacctttatcaaggccatccaactaccgttcttatgatgggtctaaaggatgacccattgaagactgccctgctggtaac  
gtcattggttggtcggtatgaccaattcttggtaagtctggtactttgaccacctgagggtgctcacaacatgaaggtcatgaagttctctgtc  
tctccgctgctcaagctgccgtgaagcaagaacggtaatgactgacctaaagcttgtaaggcttaagcgtctttcaagctgacccttctgt  
catgtgcaagactccgaatctggtagaacacattgctgctggtgagggtaattgcactggaaattgcttgatgactgcaaaacgacctgc  
tggatccctcaagatctcctcccgttctctctatgtagctgctgtagcgaacttcagatgactgcttgccaagctcctaacaagca  
caaccgtctttatgaccgctgaacctatgagtgaagaactctctatggccattgagactggtgaagattaacctcgtgacgattcaaggctcgt  
gctcgtcatggccgatgtagctcggttgggatgtaccgatgccgtaagatctggtcctcggtcctgaaaccactggtgtaacctggtg  
accaatcaaggctgtgcttacttgagcgaatcaaggactctgttgctgcttccatgggctactaaggaaggctctatcttgaagagaa  
tttgcgctcctgccctacaacattctgatgttcttcctcatgctgctgattaccgctgggtgggtcgaatcattcctactgctgctggtgt  
acgtctaccctttggctcaacctattattcaagagcccgtttcttggctgaaatccaagttctgaaagcgtatgggtggatctactctgtt  
taacagaaagcgtggtcaagtttgcctgaaggaacgtaattggtactcctgtacaacatcaaggcctacctcctgtaacagagctctccg  
ttcactggtcaactctgtaagactggtggtcaagcttccctcaattggtgtcgaactggagtcctatgagcggtgatctactgacctac  
ttctaagcccgtgctatgtgctgaagctgtaagcgaaggcttaaggataattctcctgattacactgactactacgacctttgtaagag  
gtatccattgaacagactaggtttggcctgccccgaaaatctataattattacgaagtagagattacgagaaggaagttttcagcgaaa  
taatagtgatcagatcgatattgaaataataccggtgattgtaagcagtaataatcgacagtaataatattagatgaggattaagacatggg  
aaggttgcggttgtagcagtttcagtgaaaaagcatagctacattgagcttggaacgccagcaaaagttcaaggactcgggactgag  
cgctagttattgaaatcagagctttacacaaaatggaaagtatacagagcactactaattacacctacataaaaaatattatagacgaataa  
aatgctcagaaagactcccaatattttaaattgtagaagggttaaagcactgtaaggaagagcaaaaggcttggcaggcaagttat  
gagagaacgagcacgaacacagccaggttaccatgagcgcgagcaatagtactaatgttgtagttatgaaaggaaggataaggacta  
gagaaggaagactactgaatacgggtccagagctttgaaaaaaagcattatgaactacagatcgtatgacagctgattacccccgatg  
acacgaatcttagagccgctgataggctggcacaactgttagcagtagcaaacgcttgccaaagtaaaattgagcatttcttagtgcacat  
ccttcgatcttgaacatggaaagtccagggtgatgtagcttggaaagcttggggaaaggtcttagcttaacgtacagctcctgcttggag  
caggcattttaggtgatcgtcggtgctgaaatgagtagggagcgttagtcttctgctgaaacttttatggcagtcacaaaaaggcaaa  
cctaccctatacgaaggcgtgtggaactccagggtaaaaggaatagcagggtaaaaggtaacagcaataggttggttgatgagggaaagg  
agattgtagctcgtatgctacgaatctgtctttttgtagggatgaatcaaggtttgtaatatagttatgtagccgatgaaaagtaaat  
gcaatcattgttataatccgtacggatgtgtcgttatattgagaagaatcggtcctcaattgcaacggctccgtatagaatctgtaaaatg  
cgactcgggtggcaggcgttaccctcgtagaaagataatccctaaataaaaaaagaagaatcactgattgcatgggaattattcctttatct  
cttctgattttagtgtaatatttctcggctaggagcagtgacttaagagacaaaaggcatcattctgccacgaaataattatggaatatac  
atatgtagcaagtgaatatcttattaacatgctagtgcgaagtgacttctgctggactttatttacttataactactagtaattgcttggata  
aactaaactaaagggtgtaaaaaggttactcgttcagccacaaaatttctgactgtaataatgctggaagcacttaggctagaacagctc  
ctccgctcaatcctccatataaacctttcattgaaatgtaattggtgatgggttttacatagaatatcagtgcttctgtttgctaatcgtgtt  
gttcttcaagtagtactgtcataatagctgggttggaaattatacgtattacagtaacgggtaatatgaggatattgctgaaattagaatacac  
tataagactaaaggataatgcaaattaaacaattggacaggttctgagcgaagttcttcaaaaagaaccgtccttacagagagtta  
aattatgctaacgttttagtaagatgtataactctgtgctgactcagaatgagattggaagattcactggtgtggttaaaatagaatca  
tcgaaacacttcaattagttaatcagaggacattattagcgtctatataatgtagtacaacagaatccaattaacgtaatcctacaaatgtaatta  
ttactcgcctgatatttctcataacccgtaagaattactaactgacaagcatcacatataattcctatagaattattcatattagaatatcga  
agtatttcaatgttccgacttccctccatggctcccaaatgatctaatataaccagtgatgttttggcttctatgtaactgtaccaactaca  
aggatcaggtgaaaccaggaaatcacggtgtacagtggttttgaataattgacggaactttataagaaagttcatttaattatcgttcttag  
tgaagcgtacgtgtaataggttaaaccttacctcgggtcaattatctccccgtttatagtttacctcgtagaagatatcattcttatttc  
tatattttaattctttgactctatttctgaccagcttttgtgtgtgtgtgtgtgtgtgtgtgtgtgtgtgtgtgtgtgtgtgtgtgtgtgtgt

accttcagctgaggagcctgtcatatccaatctacgaaagttgttcggaatctcctcctgaaccatcaggataaagtggtttctacggctaaa  
gagacgagaccaggtccgcaagttcctggtaaagagccgggagaggttaagtattgatttttagcgctgctgatgattttttgtgctgaaacgg  
ctttattgtcctcaagggagttgacgaacaagcttttattcattataacgacgtctgacagggattctccgaatattgtattaacaatggtata  
ggttacatcaaccgtagagatgctgctcctaccaacttagtcagctcaagtcctagctccttccaatgtgatgaaggagtagaccagcggaa  
tctagagctccgcaagcactccacatacaagttcatcagctaccactgaccgcaaagagcctgcagctcaaaatcctgtgagtagtctcctaaa  
ggttaagaagccggatgagcctaccggacaatctgctcaaatgccgctagtcacccttagaggctacgaatccccaaaaggaagaaccggat  
gctcttattggtggagatccttgcataagacaagcgtagaacaatgcgtacattttgtcaggatgctttgtctgtgttgatgggatagcggctg  
ttagagcctcgttttgacatgtattacctggtaaataaaggtaaatgggcaagctcactgattttggcttctattccgttctaagttg  
gttggcttcaaatcttctgctgctggcaaatcttatcatcatcttctcagcactttgtttatggctctaagctatagccctcgtctgac  
ggttctgatgaagtcatcctgagatgatgaagaatcccactaatgttgattacgaaactatggattggttaacgttattttcagcgtcttggg  
tgtaaatagaaccaatgattcccgtatgatagtgactaatgttgagcaatccgtcgtgaatatctccatcctcgtccagaagttcgttttct  
ctttcacactaggttcaaaggctcctctgattgatggaattcgaaccaccttgccactgagccgaatgtggttttaaggacgttgatttagctat  
actcctaacgatactttggatattctggtgcttcttctcgtgtaaattcagccgttctcctcgtgtaaggttgtaaaggaaagttatgttta  
cttctcgttttctacaaagatatttctgctgaggacaaattcgtctcgtgcaagttgtctgaggagttccatttataaagacggcttgggtct  
gtctttaagcactccaaaactttccgctactgttctcatttgacttttagcttattcgtatgctgattttctacatacctggatthaatcaattttg  
catgagcaaatgacgacgatctgtctccttagctatgtggccaaatagcttgattggacctttctcttatggctggattgctcttttctc  
ctgcaggtgtaatagctatcaaggtctactctgctcgtcgaaacgaatatcttaagtctaagactaccaaaccttcttctatgttgcagcttaact  
aatggctatgaacatggacgttctcctgttcgggctaacttacacacctatattgaacatacgatatactgctgtgtttcctcatttaagatcca  
cttgattgtctttgtttgatctgaaagtctagttaccttccggtactactacattaatactcgtctcctgttgagaagggttttattagtgat  
acagccgttattgttaatgctgtaaatacaggatctgttcttatgatctaccttttcccttctctttcccaaaaagacgttggatggttaatta  
attgaaccactgctacgctaaaggattttgcaattgtcacttggttcattaacaatattgctgagcttccggcttgaaaagaaaacacaatt  
gatatatagcgtttctgttattctaaagaaatcggatctaaaacgtcgaatgttgaccgtgccctatcaattgtctgacgacttttattca  
aaatcgtgaaactcaaaaatacagatcactgttttaagaaaataaaaaaggagcctaaccagcttataggaagtaggtgattccgcttaata  
aactactgaggctaatacaacttatccattcaagaaaagccttctctagtagtgatattcatcttctggattcccgtaaatgttacggaa  
gaaaagaacgctgaatcataccttaaggatctcattggtgttatgctatttagcataaaggcgaacaactgcgtcagtagcgttttctgtt  
aagaaaaatgatccctatgttagagtagttagtaacggtcagttgttggaagaaccgttatgcttgaataatacaaaccttattggaatgaag  
ttttagcagcactgttttggcagataaccgatgtaattgaactgaagttatggatcatgaggattctggacacgataagtccttagggtttgtgaa  
attccagttaaaagcttcaaagacgcttccagaaagacagagaaaactgcattggctaaccaaatctttggcactgatgacattgagacactgaa  
gttatttcccgtaaaggaggctcaacgctataactctgacagcaactgtgatttccgtcctgtctaaggattgctcggatgatgaaccgact  
agtaaggagagaagggaacaaggctgctgacccaatctgtaataagcggagacgtctagtagtaaacctcgttaacagtgtagtgaaagc  
ctgcaagatccctctggtcttctatgatgctggttagctggtgaaactcaagcagagggcgttgaattaagaattttcactgataactgctcct  
tccattctgacaactggaatagccaggagcaaacacctcgtggtctgcttttggattatctatgattagagagcttgaatattctgaaacaac  
atctcagttgactgatggttctgctcaagatccacacattattgtgaaacataccagaaaacgtctaaactatttagcgaatctttgggtcatgta  
tatgacgtcgatattcaagggccgaatggtaaataaacagagttcgtatctcgtatgaattatctccagtagctatgtaaccaggttgaa  
agctttatcaacacaggatcattgcatthtaactgtataacggaaaggatctcccgtaggtgacattcgtatcctggatcctacgtggtattgaa  
gatgaacaatgaggaaagttacaagagtaaggatcattaagaaaaattgaaatcctgtttggatgaagaaaccgatgtaataattcaaacccgc  
ttgttgatacgtttgatttaattgctatgactgggatctgggtgaggccgctgatgttttaggcagctcatatagacctgaattcattggagcc  
gaaatgtcaatctcaaagtgaattaaacctgaaggtaaacgaggaaaaattaatgttggtttaagattgaaacctggttggtatcgaagatctcc  
tgaattgatggttcttctccgataatttctttccgttgtaataaagggtgcaaaatcttaataggaggtattggagctgctggtggttttccat  
aaatggtgttgggtctgctggtgatctgcttaaacggtgttgggtctgctggtgcttgcctaaacggtgttgggtgctgctggtgattgggtggt  
aaagctgtatctggatttaccgatacaggaaagaattttaaagggtgtactggaaaaggccctaaatctgctcgaacaatgagcaaatgaa  
tgctatgagcaccaaactgcttcatcgttgccaagatcatcatcagctgctactatacctactacagctggcaagcaagagctctcaaaat  
cagactctttgttcaaatggtagtgattgccccataagctgtgaaggtgtaataccgataaacaaggctgacattcaagacaaggtcaca  
caaaggtccttctcaagtgaatgaacaataaccgattggatggaatcttggtgatgacttcatgtttcttaataatcctcgaacttaattggac  
acagtaaatgttggaagctacttttagtaaacgtgctgtagtacttcaagttccgttgaaggttctactactctgctggagatgagagtgga  
agctgtatgatttataattaacatctgaattttataaacaactttttagcatcaacgatttctatgttattattgcttacacagcatattgattat  
ctaattgctaacaatagaataaaatgcaacttctaaagtagaaaaaaaataactctattgtaaaataaaaatcgtaaaaataccagaataa  
ccaaactgtaagacatgaataaaaaaatgcaagtaacaatacatttaagcaataacttaataaaatgttaataatcttccgcctcttcc

cttctttaagaagccattcaatctggcggtcacattcctcttcgaaagcttagcacatctagcatactgatatttaaccaattctctactgtcatatt  
taattcttctccgtagatctccgattcacgacgttgtttgaggggttccaaaaggctagaaaaatcaactggttcccatggcggaagcgaa  
ggctttatagacggtggagcaggtttgtcctcatcggtgtacgaggagccagaaaagaagattgcgaaagaggatcgaacgggcttttgaaa  
tatcatcaggggaagtctttgatggagaagcagaaaatcggggaagttcgctctaaatggtagacctttggagtgctatgcaagaatgttg  
acttcatatatactgattccccgggggaattttgtaatggagtcttagaattccctaagaactactgcttcttcgaaacctacactctcttttct  
ccgtttgaaaagattgtttgatgttcgctatttgcattagtggtttgttcttcgcttctaacctcagaactcgccttccaattcctctcagag  
ggctccaagcttttgaaaaggcattttcgaatcatggaatatctcctcattggtaggtgagttcgtttacgtccattcgagtatccttcttagt  
gtctgttctcatcttctttgaaactgataaagtctcggtttcgctatccaataaacctctgcttctactcagtaatggatcctctgatatagtagaag  
gccgttttaaagcggttctctctatatttgcagatttcaagcggtttggaatcctgatagttcctttgatctctgaatgttttagtttacttgaaca  
tcgttgacgcgaatcctgttttaggagttgaattatcaatggatcggaaatcattgttttattgtttttcaaaattcatctttggttgagtg  
tcaagacgcggttaaggtatctgattcaagtcagaatctctcaaaatctgaagttggagtagtacagcctcaagactagaggacgaattg  
tcttcaaaagcgaacggaatgcttttacttctattttgcgaatcctggacttcatctttcctctgtcaataccttctgcttaggagattgaa  
gcaattggctaaaggtcatcgtcactagttataaaggagagggcgtgtttattgatcgaaggattttgaggaaaatctcgaaaatactgtttc  
cgcaaaaaggcttctacttctgattcactagaggctagctggttttctgatcattagctgttctgcttctagtagacagctgtctttacggttg  
aagagtaagttcggggacagtagtccatctgctgctgatgagaaacatctcaatctcagatgatttcttttttagatgtctgaaagcttctctg  
gtatttggaaataacgatcttcagcgggaaaagtgtttgataagctcatagtaggggtattcgtaggttcagcataattggaataattaca  
gagtttctttgctatttgattcaccggcatcttcttgataggggtagagcggtagccacaggagaatgaattgaatggtaacttctcatcagttct  
attaggtgaaggagggttgaaggggtaagtagagttaaagggaaaattggagccgttgggaaggatgtgtgatgaatcttctgtgttgggt  
tatgttttttaggaggttcgtagaaaatttgggagggtgatcgaatcaggctgtctctctctctcattcagagaatagggcctagctggtt  
tgaactgcatcttttgacttctcctcaactgcttccctctctgcttaggagaagtaactacagcaggctttagtggggatgagccatgatttca  
gactgtacgagagaagagtcgtgattagaattggagtataaagaaaaggatgagattggcttagagaggagatttctctcggggagaagttt  
ttgattcgtttgccattttggaaggatttttctgacgaattagaacaagctcagatacggaaacatctccagatcaacattgatgaagaaaa  
caaggaaagcttgggttgagagagcgcctcgggtctgcccacgtaaaaaaaacaatcaggacgtcagctgtgatgctctttaaaggatca  
tcatcgggctcccagtcgaaggtcaatattacagtacaagcaatgcgctgcatccttggagctgtactaggagtaaaaacgaagccagctgc  
agccatctgattcggctggcaatggaatctgaacgattgatataatggccatactttatcaacaacgtcagttctctacactcgttaaagaagg  
agcccttgatcctgatgaggattttcagccgacaaaacgtaagccatgggcaactcggactatgtgttatgtctctttaaaggatcatca  
tttcttccagtcataaaaagacttgaacacatgaagcatgtcacattgtcagccttgttggggccttgaattggattgtagtagaatccaac  
ggcagacagctaattatagctatgtagtatacgaagacatggatgctatcatgtggaagcattttctcacatacttttctgattcggcgaac  
taagtgacatgagattttctgaatgttctgagcttttggaaacattacacatttcttacgatgcctactccatcttctgattagatggttctac  
aggcttcatcagcgaataatgcaatgaatgaataaaaaaaatgatccttaacctttgtcgatcctgctaaaaacaaaaccagtaaaacc  
gtagaagcaacgcctcaataattaattcaataatacaaaagcttctcataaagcgaataattatccaagaatttagttcgatctgtattgtta  
cgtccaactgagtaaggaaagtaatgcaatacggatttggttatgtatcgttattgagacaacaccgatgcttgaatctgtattagtttctga  
cgttttaggtacttcaggtcgttatacgttaataaacatagcttctgttaaccgtgcatctcatggttagaaaatttggaaatgacaaggattcatgtt  
gcaatttctattgagcttacttctcttccgttgattacaattagttcttgaaaaagattttgctacacttcaaaaattggttggcaatttgcact  
aattataaacaatcattatcgtcattcatggtattttacttttctgaaagtaatacgaataaagtagtcttctcgcaaaaagtcaaaaggaata  
aataaccttttctttatcgtcgaaacaggcaaattaggctgctaaaagatgatagcacgacgacccattacttcaattatacaaaacgaataag  
aatacgcacaaaacaacatggaattagtaaatgaggaaaaagaaagaaaaacaaaacttaagaaaaaaatacacaattcctcaaca  
ccgttcagaatgccaagtcattacatgggcatactctcgtttatttctcaaagttgaagttgctagtcggcaactcactagatccaaaagtgatg  
tgtccctgcaacatcaggttctagatctcaacaacatcttcttccaaaatccttcaatgatgttatatgccttctgatatttccgcatgtgc  
agaatttgcgaatcgtagataaggtccataaccgacgacatctcaataaacagcgtataagtaatcttctcgggattctcggctcgtcaagc  
tcgccaacgcgaagtagtttcaattcgtctaaagcaactgaaataatcttatctgcaagcaagtagattacacaaggccttgatagca  
ccttgagaaacgatatacgaattgacttgggtgatttataccaccagaggtagcgttggagacagccagcaggcttcttctgaatcttgaat  
cagctgttgcgagaaggtgatcaagggaggaataatgttggcttcaatgacatactgaatttgtgaggcattgcctgctgtaatgttacttattgt  
ccagcaggctccttaccgataccatcacgaggatggctgagcaatgacaatagacacttagagcaccacaattaatgatgacttgtgtttaa  
gatcatcaccagtgacgatgttaccgacagagcgaagagcgggagctggtttgagggttaggatgattaaaagtcactaaccttctagg  
gattctcgtcatctataattgcttgaatttttcttggccgtccgataaataagaataagccaaaggcctactataacatcatcatcaagt  
gaatataatttcgacaaaactgggattacgcaagagattacattccagctggttggggttttaccacggcacatattcgataaggtccaa  
gtacagttgcgaagcactaagacgcttaacagatcaatgacggctagcaaggttccaaaactccgactgaaggacgtgatcacggcaca

tgggtgaatcaccagcaatgttaccagagcccaaacagcttgctcgcgaacatcctttcaggagatgaaagtaaactgacaaaatgggaac  
ggcaccagaatttacaacggtatgagtctgatctgaagaccgcttgcaatgttggttaacgccaggaagcctcaaactgagtaaatattttc  
gtgtccaagaattctacaaaacggggcacaacaccagtggtgatgacctttgaaataggtgggtcatgctctttcgataaagctttacgaaactt  
ggtagtagcctggattgtattcaatatcatcggtatacaaaagctttaccatgttaggcaactgtaaatccaactcggagtcattttcctttcatt  
tactatgggctgaacttctcagtaggctcttcaactacatctgctaaattacgacgcttgctcagattctcttcgctgtttgtttacgaattcaatt  
gctgctttcacgtcggcgacgcaactcatcagcttgaaaagctcctttcctttgtaattttgtctctatgttcaggaataaaacgagaaggcgta  
ctcatgttcaattccagatttccctatattcctttctggatggaagtggtaaaaggctgggcccagctaaaggtaagaaatgtaagcgttctttcgaa  
aagggaataatgatgctgtaataaaatatttaagtttaaatcagaaaaatgtacaaaaatgctttctattactatatttcgtgttttaaaata  
gtctgattttgtctgttttggaaacatgaaaataaaaaatgcaaatattgatgaatgagattatatttcttataaaattatagtaaaattaattc  
atgtgggactcaaacccttaaggagaattccaagattaacataagacaagcttctataagacaccttcagcaagggtgatgtgctagcttctgt  
gacaaatatagtttttgaagaggaaatgaaatgtatataggttattgtgaagaaatgagatattatccatccctttatactttatactttgt  
aactttagtctgtttgaactagtagcacatagtgatacaacaagagcttagtgaggtaaagtactatagattaactatcgattgagattct  
atctttctgtttcaacgttaacttttaaaagtgagaaattagaatctgccatgtctgacaaaactgatctcaaaactcaagattgcaaaagaaa  
aagaatttcggcgtgtagcaattagtaagataatataaacttgcacactctacttttacctctcacactttgatatgagagaaggaatctttcaac  
atacatataaaataaatagaaagaacaaaggtattcttctggacagccagataaatatttagcaatcaaagccaacgaaagtagttaacaaga  
gaaagaaaactgccatctgatactaatctcattatacactcatgttgcgttatgaggaatgaaatcgaaagtgagtcctatgtcactgttgc  
tcttcttattcctaaatatatgactcatattttgggatactgcttttaagcactaatttcatgtcgtaatgtggaatatcgtcctcaagatagc  
tatcactttgaatcataaatcaaaagattggtaaaacgctttcaataagcttgggctgaaatattacgacttttcttctgggtatttacctctac  
cggcagctaaagcttcttcaaaatcctgctccatagccatataccccgcgctcaggtgaaacgacaagcctcaattcgaacccattgggtt  
cagatattactctagcataagcaagaattttatcctcttatttttaagcatcaagtggtcagatatcaagtcacttcatccacatcttgtaagga  
caatgttgtccacaacaaactgccccttaaatagatataagagaacaaactttaggagttagttgatcaaatggtttcaggaccagcagc  
attgtgtgataaccaaaatatggatttccggcttcttttcaatcaatcagtttaataactactgtcccaattcctttgtattgcaaaatcaggtgc  
tttgtgctcaaggtcatatactaccttacgggattctaagcttgtttcctaatacgaatagagcacgcaaaatagctgtgtatcgtcactgtaaaagt  
ttatagaaaagtttcttcttcatgtgactgttttctcagagaaaaccattttgatgaagggtcaagttcaggaactgatataaaccagttacatac  
cacaatgtcggaaacaggaacaagttgaagctgagcaagttgacgttgtgaacaagttgaagaacaaactgctgctcccgaagtttctgtg  
aagatgctttgaaggaagtttgaagcgtcccttgttcacgacggcttcccgtggtatccgtgaggccttaaggcttgcactgctcaagc  
tcacctttgcgtccttgcgagcttgcgaccaagaggcttacgtcaagcttgtgaggcccttctgtgctgaatctgaaactcctttgatcaaggtcg  
ctgatcccaaggttttgggtgaatgggctgtctctgtgcttaccgctgatggcaatgccgtaaggctcgtcgtcttctgtattgccgttact  
gtaagttattgatagaagaagcagtgccaagtggtgttctttaaactgtgttttctacgttttctaaagactaacgaaattaggactatgggtg  
aggactccgctgcttcaaaagcttttgggtagcttctgcttataaaactgtttcataataaatatgaaaaggcaatatagcgtcgttacttctc  
tattattgtagattatcttgtttcgaagcacgaatacggttatggatgaagggccagtcagtttcagaaaactgatattttctgtttgaaat  
ccaatgaagcgaaccgaggtagtggttcaagtagaagtcgtatggactagctcaaaaagaaatgatttgcacaggtaatcctctagaaatgcc  
atctcatcgtataaataagctcaaatgggtgaattgctgtatgagatataatgtcataagaatccgatctcaagattttttataattcatgcatt  
cagtgatgtgaatataatgcaatattgaagagggcttgcactaattcaatgatccattggatatttttggcaggtgcaacttgccttttcatatat  
tgagaaatcccaatggcctttatatttagcattgacaagatcttcttcccaatagttatttctgctttctctgtagctaatagtcttaataatcctt  
tagaaataatcatttaccgggttattcccatctcctttcatttttttggaaattcttctgctgattgaattcagttcctaatgggcttccccgtt  
aggtcgatttctggagccgttgggaaactattcattatcaagtcctcctctcctggcaatagttatagacggacctgatttgcctta  
ctggcttgggttctgtctctatttacccttcaaattatcgtcgtttcaagatgctatcctcagtttccaccaatttctgttaagcttgggatttctga  
tatgtatgtcaccaaatctttgagcttctcaattccttttgattgtgatcaaaaatgggtgctaaccataatagagaatagtatttgatgggtg  
actccttattctaaacatcagactcgaaaagcaagatatcaaaaaatctcagatccatggatgcttatgttcacctttgttccgattgca  
catcatgctctaaaggaattgccccgcaaacggttgcgtttgtaatacaagaagctgataagattgtgcaattcaagccagacaattagatggt  
attgtactcagccaggttgcatttcttataatctagaagccccctatactggttatgtgcctttacattcaattcaattacttctgatggct  
tacatgggaagctgtataacttccaggaaataaaaaggcattttcatttgatccattactagcggcttacctgggagtcgaaggccatccgg  
aagaccaagtcattacaacagcagtttcaacagatttgaagtaacttgaagaaatgtgaaaagtgaggactcggaaaagctcgtttca  
gcacaggaattaccgctgttcaaaatctattcattagatgatgttagttatcttctcagttaaatgattttatgtggggaagagtgaaga  
acttttacttctacgttagagcctccggagatgtggcttctcagttgcctgaattaccagctcgtccttctgattggactgagaacgcacctctca  
ggctgcaggcgtatgcaactcctttccaaagaaaatcaaaagcatatgtgctagagtaacttccggaatcacggacagcttagcaaaaaactc  
gtatctattaatttgactatgctcggctcatagatacaatgcagaacaagtttctagttggccttctcagcatcgatttcttctggactctaagg

tgcttaaaaatcttacaatgttactgctaccagctttctattgatgcacgctagtctctacctaatacacctttacgtttgacgtttgttacca  
actcaagaaggcatgcactagtttcacgttatattgctacgagctactcattgtgtatgtaaatatttagtaatttgataaagaccgatccatcga  
ccttcgaagtctctcgtcctcagctctttcagcactgttaactttcgtttattccacgaagcaatgagcaaactgaaaacaggaaagagcca  
ttaagtattgtttcagacaaagccactgctgaactgacttacagattgtataaagaccttctcgagactataaggatatggaatatgttatcaat  
atgtggaacacagagatcattaaaagaacgtaaaaaataaataatattgattatcacaacaacaccattaatcacctttctttcttta  
aaaagactagttatacacgtcaatgccaaacaaaaccattatctttcgaatctgtaaaactgtatgttggtattaatcctttaaggattagg  
aggagatgtgcctggaggcatgggcatcccaggaggtgcgcaaaagggaatagactggggcatcccaggagcattgtactcctggtgcacct  
ggtaacggcatgcctggaggagccgataagcagaaaatgcagaaggcataccttgcggaggagcattcctggtggaagcataggaggctgt  
gggagattcatcataggagtagccaacatccgggtgctgactggctgttgtagtccagggggagcagtcgcaggaacagggtcggggaggaa  
gaccaggaggcatgcccgggaatgggtacaccggaagattgaaatcgatacaactggttgggtattctgttgcgaagggggcaaccaccagt  
tgatgtggaagaggcaggctgagcaggtaccgcttgttccaaggagcaggagcaggagtagaagcaacgctcgggtagctttcgccaagg  
agcaggactagaagattctgatgatggccctgtgttggcagccatgggggtggtgcagctgagtttgggtggaagttcagtatattccaagc  
gtgtggccagcagaggaagtaatagagccaccaccaattcttgcatgaggcttgatactcacggctagccggcatcacctacgggaggct  
ggttctttacaggacaatcccgctgaatattggcctgctttccacagtgtctgcaacaatatttagggtatgattaatcgttccgggacagtcata  
acgacgatgaccaacattaccacagttttgacaacctgattctctgcatctcgagagtagcattgagagtgccagttgacggagttgattct  
cttttagatcattctgaccttcaggagtggaagcagcagtttgaatcacaatctgattagtcgaatggcaagactaattttatcttctgaatcggcg  
ctcacaagacaatgaaggcttcttccatattgcccgtacagatggatcgcttttaccctttcttcttgacacttctttaccacgaattgcaatt  
tggcacctgatttgcactccatgtctttcaatgtatgaccacgaggaccgattaaaagaccaatgaagttgatttcagggtaatcttgacaggaa  
cgtaaaccttttctgtgttttctgctggggcgataatcgctaggagccttaaaattgggaacagcttctatagccttttcgataatgatgacgc  
tcgctcttagcttttctgtagcgaatttcttctgtattcaatcgacgaccatggttgcgtattgaggaggaggagaaggagatcgttctctatca  
cgaggaacaacgttctgtacgaagtttgggtgatttctcaagctgacattatagcaaacatttccactgttctcgtcatacaagattg  
aatacttagttctaattccatttgagaaggcaacatttcaatcaataggagtcggttgccccataatgtcttctgtaagaatggcgtccacgatctt  
caggatatcgatttcttgcagcataggaagattctgattgatcagcttgatcaaatctgctttagagcttacagaatcaggcaatggcggca  
aggagtcgggtccttgatcaaacgcctccgaccaagaggaacattgttagatcctgtatatgttagcaatgtaagctgttcttcttttcttta  
cctgtagaccatagatctcgctttcagcattttgaaggggtctgttttgaacacgagagtggttagaggaagaaattgggtgctggaggagg  
caacatgaaaggacaccaaccttcatacatggaagcaaccttttctatttggatgaattcattcgtaaaatagtatctataactctatctcaa  
cttatatatcatgaatagtttctttggccatgaaaccaagaattttcattgtaaggaggccatacaaaaagatgcatgaccatcgagatgg  
ttatcttcataaaaaagaatcgctagaaacaaaaatgacattagaaaaacaacatcattaattcatacgagagccattatgatccttttaaga  
tcttagaatgcatatttgccttactactgaagcctttcgtagcttaactctatttctggtggtttgtaataatatttacaaggcaggcacacata  
tggaaaaacagaatcatctaagaaactcacaagattcgtcaaacgatctcagccgtaagattcattcgtttttatgcatatacaggtcca  
aaggctcatcctatggtcgatcctttatggtacattactgcaaaagtggaagagagcactgctcgttgtattcaccgaattctttcctaaaca  
attccttcttatcatttggattttttagtaataaatgtggtatagacaaaaaaaggacttacagtagatcctcgttagcacgatttcttggctg  
atgcactagatcttggaaaaagctctatctgaagtgttaattaggatatagaaaaagaaatctaaaaaaataaatgttcgaaaagacccttg  
atcgaaaaatgaactctacagtgcttctgtagctaggaacttccagtcgaatttgcgaaaagtttccagcagctagctgtctagttggtctgag  
aagccttatttcttcaaggataatcgtaaaagtagcttctgttcttcttataagatccaatctgtttatttactattataccgacttttagc  
ataattgaaataaaaaatcgttactagtagtataggagcagaaaaacagaattcctcgaaaccgaacgatagagagaagaaaagaaaaaga  
aaaaactaaagagaattcaattgccaaactaccatctccaattgcatttcccattgtcgaccattctcaacaggaagcctttacctgttt  
tgatcaactggtgtgaaaaacaattctagctaaattgaaacttttgaacatctagaaaaacgaatagcttgcagctctgtacaatagactc  
caggacttacgaacatctgtatatatagaaactggacatttggagaactgttttgggttttttagacgcttttctgttattcctttttgtcaaatc  
ttaaaaatcacgaaacatgccatttctagctattctcacagtgagcagtaaggccaccataatcgcttgcgaaggtattaacggatccagattt  
tgtttacacgctcaaggaacctagaacaggttatccaggaagctatacgacaggattccacacgttttcttactgagcattgtcctcgaaag  
tatgctgaggatttataccagaagaagtgagtattcattctttaaagcttcatacctgaattctcttttcttcccctccttcttcttcttagata  
aaaaagagccagaaacgaacggattcatttgacatctcagaaaaagaaacggaactaaccaatcgaaatgtagtctcatttaactcctca  
agatttgttaacacatttgatgactatgctgactgctaaaagcctacgagaaaaatcgcagacaagattcagatttaattggatccgagac  
agaatacattcgtccagactctatgatctttacgggacttgtgtcaagtataatctggattatctagtaggcagcgtgcaccatgtaatacag  
attcctattgatttctcatcagaactttggcacaagctctggagcatgttgatggcgattacgagaagctgttttagactatttcaatcatcagttt  
accctttgacagccttacagccctagctcgtcgtcattttgacttgattgctgtatgcgaacgaagaagccatgcaagtattcatgattctac  
caagggttgggaagccattgaacgaaacatacagtatgtagttaactatggcggtgttttgaatcaacacgctcgttccgaaaaggatggtc

agtcgcttaccctcaactggttaaagtaagtttctatatttactgtgtaacctgttggcagttgatgcaaaaacataatggtcgcttta  
ccttctgatgatagccatggtcctcaccaggtaggtttaaattatcatcgaggcaaagcgtatctagaagatgaaggcattacacgcttgcgg  
ttctttcacgtagctctgagggaaattcgtactactttccaaatgatccctgtttccaaataggtctacctttgtagggaagaatggcgtcgtctat  
aaataggtcttcatTTTTacacgcaaacttttttactgtctcaaaaaaaaccagtttttagaagagaatcctcttcttctgcttgcaac  
acatgtttcacttctacagataagatggcttctcacttctcaacttgaatTTTTatttattcattacgccgaatattgattcaatacaciaa  
tcatcgataagaagcaaaaacaaagaatctaatatcgacattacaacagacttaaagatatctattgtaacaaaggaaaaacaggcccaa  
aacaggttgcaaacagctatgttcttctctagttatggaacttatctcatatttgaatcccaaagacttgaacagatctaggaaaaggaag  
tcttttttagaggactgtaaacgtgaccacaaacgaacttttattagcatattcactgctcatggccctatgttcgaaaggaaactacaataca  
tcatgaacggctgtaacggatgaaaggggaggacaaggaattaaggagctgttgaaaggaaataaaacaaacgtgaaagggaaccga  
aatatgcagcaaaatctcgttacaagctaaattaggtttgcctattaagagaacaaaaataagaatgccacaaaccactgaaatccgcaaggaa  
ccggacaagattaacaagaaggaataagagagaaacaaaaataaacacagcaaaagccatacatccggacaaagaacgagggtacaag  
aaatcactaggtaaaagaatcaggccattcaattaatgatcaagattaggggcaatgctagagtgaagaccgctgcgaatagcattcatattag  
gactcatattgtaccatgtttgtaccatgttcgacccatattgtaccatattaggggtcatgtttgggtcatatttgattcatattgacgct  
gtgagggtggccataaggggagtgagtttcttttccaagatgtattgtatcgagaagctgatgaatacgttgttatcgggtgacagttct  
tcaacacgagcgtgagttgatgttttttcttattgtcatggagatgtttcgacaaaaagtaaccttagccactaacatgtcaacattttgtt  
atcgtcagtgagtttttaaggcgttcgttgatctcatcattacaatcacattttcgttgcgacaaaaacttttcagatactgttgaattcactt  
aatcgggccttccactcgtcacacagttggtcaagttcatcttctcaggagtagtttcatgccgggtgacgatgggcaagacgttgttcgtaa  
cacgataattgagatgattgttacggcaagcagattcagatggatagcaagtccttcttctcataaccgatcggggcaatcttagcataga  
attcgttagcttgcgatccccaattcatgcttatgttgaacaaccaagcgcacatcaattaatcttttctccaaagcaaatgagtagcgtgac  
ctttcgggagaggaaactaggagagagagaagcattttctgttataactcttcaactcatttttaggacctgcttccatacctgcaataatgag  
ggatccgtcttgggcaactgggtgaaatttggtgcttgggtagcaagcgcacaaactcagaaatgggggaaaccgaaaaaaaagcgggc  
gtagagacgcgcgtaaatgctataaatgcgaaagggaaaaagcacttctggaagatggactacggctacaagaacggcagtcaca  
caggaaaaccaatggaaaatatttctaccaacaagaatgatgctactgaaccgtaaaggagacaaagcaaaaggttcaacctcaagaacgaa  
gattgatgaactttaagcaatcaattatataaaaagccaacagctaatcaacaaggactgttgaacgattaacaaaaacaaatcaacaag  
cacgtaatgcaatgtaatccacagattcaagaagggaacgttgaagaatacaacgacaagcaacgaaagctttatattgaaaaccaaagg  
ttttatagcgttgcctcgttagagaaaaaaatagtgagacgaagaatctgaagagcgtaaaaatggaatttcagtagcaagtgaaaccactaaa  
agaaacactttcagaaaaaaaaagatgctttatagcgttaagcttaagagcaaaagcaaacctaacgaaatagaagaagatgcttagg  
aagaagaaaaagcaaaagcaaatggagggtgatgcgtggttaggacgagttcgttgggatacgcagcacttcaataagatagagtgccacc  
aaaatgcagccaggttcaatgatgacatacggcggggaagaagtggtcacaagggaataaacagtgccaatcagaaaaggcaaaa  
agaagtgagagaattctgcaacgatgataacggactgttgcgaacgtaaccaacgagtgacgttatatagaaggattgtattggagaatgtt  
agaaagtgcattaggtgatacggaaaggacaaaattgcatttaaggagacgtaagaggaaggagattgaaggaaacccttgataagccttca  
ttacacaatcgaacgttactcgttaggaaatagtgccaaaatgtagggtaggggctagttcccaacaaaagaaattagcgcagttcagaaa  
gaggcgcaaaaacaaaaattcgaactgcaacgagggtgagagagagaaataaatcgcaaatcttaaacacgagttaaatctctatggtgtc  
atggtaaggtggttagctctggaatgaatcatgaagatgatgtatataaataaacaataaacaacaaataaaaaggaataagagtgtagt  
ttcgtatgataacagatgataatcgttagcaaccgatatttacaaggcttgttataaagaatataagaatcggtaataaactcacttagcac  
catgagagaagtgTTTTatttacgaattctgactagcaagagacaaagaacgaaacagaaaaataaatatgtcactaacttttggtttctgtag  
gtcattccattaatagcaggtatttcttttctcattttatagaagatcgatatagtcgtatagaaacccctccatttttagcaactcaatctt  
tcacggaggcactggcttcaaaactttttatttttatttctgttaaaaaacgtgtcgtacagatctttgtacatcatgtaataagaaaagc  
ccaatagcaatgattaaacgatagataaaaagaaactccttctagattgaattgaaagtactcgttcaattcacctttcatgttgattac  
attaaccaagcagttatttctattgctgttatcaaaaaataactgagtaaaagtaacaaataactaccagagtagagtgagagtaaat  
ccttcattaatattctgtagcctcaacgttttaattgaaagattaatgtaggcatatgttttttttttttttaattccaaactcaaatTTTg  
actatagggtatgtgaaaagcaggctagcagagcttcaactgttgaaaattgactagaagttaccatgtgtttatagattataaagtaataa  
ttaatcatcaattagtagtctcactctattgaagatgcctaccaggaaggacgcatatttttgttatattagaaaagattatcgtactggaaa  
tgaggagatccgacttaataagaactgtaactaatcagcgtcctagtgaaattcaaaaaattgggtgtacaattgtggattttgtcaacgcta  
ttgatgaattttatttctatttattgttgaaaaatgatatacaataagatgattcataacgcaaggttttggtagcatttttaaatcatggtt  
tcaacgcatattaaccaatctttatataagcacagaaaagagatttttttttttttttttttttttttttttttttttttttttttttttttt  
ggaatgacaatctgccttctatgccttttattgttctgtaactgaaaatattggacgttgtgtaagaagagtaagattcgaataattgtttatagga  
gtgctgctttttcaggttaagtactatattgaataaggaaaaaatgggatattccttttcttcatctacgaatccttcttcttcaagttgttacc

tacaaagtaacgaccaacaatcaaaaggtgaagtatttcaaaaacatgagattgagaatagtttcttggcgatatatcgaattcaaattgtaattt  
ttgtttatagttggaacttctgtaagttcatactgttcaagaagagaagagaaattaagaaccggagtcacacgagcagctagctaaaaata  
acttcaaagaaactactgggtgtaatgtagttgaagaataagaacaaaactgcatcttacataatgagatttaattggaattagctgtctgtcttt  
tgtaaagacaacctaactattcaggtaaaccattgttcaacggtatataactttcttgcagttcatttactcatcatataaattgcctttctaatt  
ccggtcaaattgaagatttatgaataatataaaaaagggcttactcatctgttctttatgaatgaggacattctaattcctctacgataacgctc  
tgagaggtacataactgttctaataacttaccagatactttctatcatcataagggttctttttatcaattcaataatgatcaaccttttttaagc  
agcactgtttgtgaaaaacgtatataactaataatagataaaaaactgtttgaaaaagagagcataactagaatgaccgtttattaacttttat  
ttacagctatatgagaattcatcaagcttctctgtattttgagtttccctccttaggcaaaatgatcaaccaagctccaatcttaacgctcata  
aatgaagaaccattgtgccacactgcatagatttaccgattaaagaacaagtcggttaggcatgattagaagattcgaaattcgctggtcaca  
aacaatcctgggtcaagggtaggactgaggggtgacaagttatttgtttatagattgcttatgagggtcagtaacctgtgattacttttaa  
ccattcgtaaaaattcattgcaattaactgaaaatagctgtataataaatcattattcatatggttaggagcctctagttcctagtgaaagaaa  
gtgcatgctaatacaaaagcgtagtctgacaatacaaaaaacaagaactaaatgagagtattaccgaaagagaaagtcataactaat  
gtttaggggacaagaagcaattggaatttcagatcaagtaacttctaaaaactgcttcttcaaaggacttaggttctatagatcttcgcttca  
accgagtgcttccatggttccgcatgcactttaccatcacttacattgtgtaaccggtaaagtattgtctttgtgaaagattccagatttctga  
agcgaagggatttttctcgggtgaggtgagcgtattcatgtagatagaagcaaggttcaattcagaagactagtgcttcaattttacattcag  
tgcttcaataagtttccattcaccaaacctgggcaacattgcatcatcaccattaaacacccatttactcaagatgtttccaagtatcacgt  
tcgtaaatcaacgggagattttgttcagaggaaacatctacgacaagagcatcccaggccttcttcttgaagctaccgacctcatgccc  
cggcccaagacttccgctccacttctgttagcaaggtacaaaagttcgggaagctccaagcaattcttgagtccttaaaactgaagcaagag  
agcgtgatgtagagctgtgacgaattgcaacaagcatgtttggggtgtaacccccagagacatctgttccaaagaaactttgatccggcat  
ctaaaagtttgcgaatatttgcataactgcccacaaacggcgttactagttggacaatgagaaataaccgcttctttataaatagtttcaat  
cttctgtctttaggtagacagcatgtgccaacacagtttctggtgtcaataagctgtgatcatagacgtcgggtataagatttccgatcagg  
aacaactcacgaacgagagcaatttctcctaaattttagatataatgagttggataggaagatcatgattagcagcaagttctccacaggcttc  
agcaaatcttggtagaagaaggagcaaaccttggggtaatgatgggagaaacaaacttctgattgggatcaagttgtgacataaacgaaaca  
gtacgtttgtagcctctacagaggacttacaagacttttgcgaataatgagccgggtgaaaggggttcatattgcatttaccgatatacggcgtt  
accaagactaaaacagagttctgcaagtaaagccgaggcaggatgtagagagcgaagtagctagcaaaagtagtaccataagaaagtg  
tgccgggtgacaacacggtaataagatttccaagccctatccagattgaggaaagaagactctattggaaaagtatattttcaagccattcagca  
agggcagatcaatgccgaaaccagcatttgggtattgccccgcatggatgtcgtgtcaataaatcctggaaagaaaaactgtaagggctttaa  
tacgtgaactcggcgttcttcaacatgtgatgggattttgcaaacgaatggttctatctgttacggattttgcaagaaatacaatcgtacctgat  
gcacgcctactgtcgttcttcaatctccagtgcttagtaaggggtatgaatgagtttctacaaagatgatataatgacttgaaccatttt  
gtgagaatttgaacaaagacaagcctcaaaatagttttcaagagaggttctgattcagcttcaatataatgatgtaattaaagcgaagc  
cgacaactgtagacagcactagttgtaacctgtagatctattgaaatacaaatgcaatgcttttgaaatagtaacaagaagtcgagctgttaa  
agatcgtcaaaatagtagctttgtatgtataatgccttggtagcttagaattgatgaatttctacaaaacaaaaagactagtttagtagtt  
gtttgtgatatttctgcaaatcgatataagtagcttttctaaagtctatataatgataaaaaacacctaactcgccttgagcaatctacactc  
acagaccagatacactatgataaaacaatcctatccttgggtgtgataaacgaatttggatgccttaaggtagttcaaggagattcctacg  
aagataatataaccggcgggtgtagaaaacgaaaatttagcttcaactcgcggtgtttttgaggtcagcgaacgtcctatacgaaaatta  
taggacgaccacctttaggaaatcctaaatttagttcaaaagcaaccgaaaaatcgttatgtaccaaatctgtattgacgcttcttcttatt  
tttctcttgaattgtatctcaagagaacgcactttctgattaaagtaacagttaaattgtcacttgattagaaaaaaaatttgcga  
agggaatgagatgtagaanaatcattgctgttccagaaaataatgtttatagctttaaattttaaataagagaagccgctgtttata  
gagtaggaatgattgcatgaggaccatattgtcatgtatgccataggtaaagagaaaaagataaaaaagactagtttctaactcactgtttac  
ttggatctgatcttctgcttctcatcggtaaccccaattgcatgatcttctcggaaaagactgtgcatcgcacattggagatactttt  
tggcaaggggtgacattcctgtttgactacgattcgttttgatgattccaaatactctctatgacatacgtgattcacctatcgttaaaaa  
gattagctcattgccataaaatccttcaatgcataccaaatgatccaaaggaaaactgctcgtcgggtggttcttacttgcataaggaata  
gagccaccagctaaagttcatagtttagtcaatcattctttcattaaaaataccgaaatccgagaatgatgaaagaaccgcaagctcatcttttc  
gaagccattgctgattagattccagcacagcacaagagaaggttaagtaagaaaattcattattgagattgtttccatcgatcggaaatgg  
aaaatttagccttcaatgttactaaatctcatatgatccaaaacgattgaaaacagtatacaagatcttcaaatcaatcatttcaaaaaaaa  
gtctagaatgccttctggaatttcttctctatcttgaacagcttctgcttcttcttcttttacttactcctcggaaagacatcttgaatgaatt  
ccttttttttaagaataacgtatataaaccaaaaacaaagtagaagatttatagaaataggcttcttggtatgtacaaggatttttctg  
agttgttctgttctttaaatttacgactcctcaaatgccactatttcaactctgatttcttctcgcattcaatgcaaaaagta



tcaccaatatgaaatatccttgtttgtgaccttacttattctaattttctgattacttatacagaatagtgacgttactttgttctactgaaatacca  
accgtattagctcgtctagacttcagggttgaattgctttaaataaaaaatttctacaaaaagaaagcttccggctagatattcatttctaattg  
caagtattatcagaaacaaagcatcttttctttaccattaccgcttcaaactctaaactaaaactacacagtgcaacctagatccttaagaaa  
actgttctgatactacaggccttagcttttctgctcgttactaacagatttctctgtaggaggtcagtagcagcttcagtggaagattgtgtttt  
tcagtctcaggctgcttgttgcagcatccttcttagcatttttcttctgttcttcttagccttttctcgtccttgggtcaggataagccaactaatg  
actccttccatattcaggatgagacttcaattcagcttgaacagtggaagtaagcattgatggatgattgtaatccatttcaaatcttgaggag  
ctagagctgctctacgtaggcttctccacttctcatatgtgtttaaacaacttaccaccatactttcaggacggcgaatgacaaaattccttt  
caccacgaaactcattgcaggaaaagaacatgcttcaaaaatgcaaggcatcattgtcttcaacaacaccaggctcaaaaagcactacg  
aaccttttctttacgacattgggttctcgaacaaatcaatttttagcattagcacctgagggaagcagacattttaccgctgtaagctgggtacc  
atagggtcatgagatgtgagcgttcttgaacctatcataggaagaagcttctcagccaagataaaaaattttacgttgatcaacaccgcaaat  
tgaacgtcaacattcaaatattgctcatcaagagcttgataccgggtacatcaagctagaaattaaaggactggcaacctgttgacgacttca  
gcaccagctcgcatagcacgtgctctgtagtactgcacaagcacggtagttatcceaagcatatttctttcaattgataactagatccaacaa  
taaagtcaacttctcaatggggacattcaatgacttcaaaattgctttatgactagttcataatagcgaacacgatgttgaactagttcattgg  
tctttcatattatctaagaaagcatgaacatcagccaaaagcactttcacgtggacaccggcttgcacaaaagtcgctagtttcatcaaaggaa  
caaagtaaccacagtgaggacgaccagtgaggcagtagcaaaaatagttcgagatcagttcctttaaatttcacggatagcatctccacca  
agaacctcatgtaaatctgagtaataactcgtacttttcatcaacggaaagaccattttctgactgaaatccctatttctcgaaaaaacaca  
gacacaggatgttggtaaggccgtccgatcgtcgcctttttctcccggcttctttaccgtgagatagccaaagatggatttcaacgggat  
ctcgattaacgaaagtaacgaagttcattaagcataaatcatatcaaaacaaattgaaggaccagaaattaaggatttattaacgaagagcc  
caaacctcatgctcgtttaaattttacggcaggttttaggcttaattatgtttacgggaatgaaacgtttgggtagatgcacagagttacaacga  
tcttcaatgcttttcacgaaataatgaagatccaagtgcctcgtcaaggatgccttggggcagcgaatgcaatgtttggcgtccaatttcatat  
ccaaaggacattgagcataaacatcctggagaaagcgaatttctactgaaaacttctgtttccggagggttaggtacgctcaaacagttcaaacg  
agattgtgtaagatagccaattctggaatctggtttcggggcatcttcataggttaaccagactcaaggatacaatttaataatgtatataatg  
cgattcttggtaagtagatccttggatgcgtggtctgagctctcgtcaatttgatgtcatcgaggactgtcgtaaaaggggtacactgtca  
gtaatccaattcaagcttttctcgttctatacctaactcctgaggagaaacgaagtaacaaaaccttagcaagatcataaattcatatag  
cttctcaagggtctttccgtcttctgagatttttcatattgaaatctcattgttggagtcatttgaagaactagaagaatctctgggaatt  
aaactaggatcttgaggtagcttaaatattgatacggagtaaatatttcttcaaaaattggcgttgtgtaaggcgtcatatttaagggtatcat  
agagttcggacaccttagatgggtccgttctcagaatcgcaaaattcattaaaagcttttccatcgtccctaaacaaggcaggggtttcact  
gcagcaccagcgagactgtacttgcacacccaggtcccaatagataaaattctcacgcaaaatggctcgggtgatacttcaactgaactac  
ctgttcataaactcacaagggttaggcatgtttctggcattgaaacttcttctgctcactcaccttaataaagactcaaatgtttcttg  
acctatcattgtatctttagcagcatttgagctgcaaaaagatctttctgatttaagcaagtcatttctatggttcttctcaaaaaggcca  
ttgcaaaaattcagcagaagtgaaacacgtcgttcggatgaagtgaatttcaacatcttttaacattcacggttcataatatacaaatctt  
acgaaattgttccaagatccttagattggtatcgtcagaatgggtaattcaccacccatttaagataagctgtagtttgtgagctttcctt  
ctgaagagtagctggtttgagctgaactttgtgccaggtaaatttttgtttctaaagcaagtcattgctatggttcttctcaaaaaggcca  
ttcagctctgatgctatattcgtagcggccagaacgctatttaactgttctggtggcgaatataaacttcttctgtgacctgaagcagcttagcaa  
aaggctcagacgtgaatgaaatttaattttgctcggagtcgggtcggcatgacgaagtactacaaccagacttcaagctccaagcttccac  
tttccctgggaggggattaagtagtcttgaactgagggaacacggtttcttctatggcgttcagcaacatgaaacatctgttttagaatacgggc  
ggcgttatcataataatcattattatctttacaatgaccagccatttcatcaatcacataggattttccggatactttagcaagtcgaaaccac  
aaactggctgttgaaagcaatagatatcttgaagccataacttttctcatcggataaattggaatgaaccgtatttctttccatggggattg  
cgtctcaaatgccatctacaacgggtgacttcttgtttcagcatgactataatgagagccaacagtgatatttcaacatcctctcgttatcgac  
attcataaattgttcataaatatgatccgtctgtacgggttagcaagttcaggatcgaatcagaggactgtttgcaatttcaaaaataat  
ttccggccaccaccctgcagattgggaaagtagatataaatattatgatcttaccatagtaggcttctccacaaatggcttcttagtatttg  
accgtccacagagtgatcgtcatccagcatttcaactttgtaagggttcttctcaaatggaaccaaactttcgtttcaattttccgcca  
atggcttattcaaatttggaccgcatctcgattacaatcaatctcaggagttgaaacgctgattgagttcaaaatttcaaaactagacgct  
atccatagcaattcttgaatacaacatcgttcacacaaaacggttttcaaatcaacgtatcgttctgcttttcaagaggaaatccgtttgaa  
agaacaaatataatagtcacaagcaggccaattcttacttctcgtcctcaaaatcatgttctcggaaaacaatagcctcaaacgccttctg  
cgataattcgattcaaaaattacggcatggcttcgaccgcttagcatcctatagcacatacctaccacattatgctttataggaggctgag  
aagttcctgaagatacaggcgtgttctggtgaaatggttctcgtcagaagcagcgtgagatgctcttttgagacattctttggaaagttaa  
taaattttttattacaagtagaaaagctttaaagtaacaagcaccgagttttgagatttctaaagattcgttctgtttgtactagttgcat

ggttcggctaaatcgttcatgttacctgtgctatagacaacttcattcggacgttatttttcttaagaattacattctgtaataaacattggcct  
ttcctttactttttgtattccttaagagcctgaatcttttcttgacaaaatttcttttccctatgcttgacttgcaataacgttcaattttctc  
tttacaagaagctttaagataaaaaacataccgattgaacgtagaaaactaattgatggaagattttctgttgatattgtgtaaaaaagga  
cctttcaactttaacgcgctcttcggatgtcttgtaaaagttatacgatattacggcgaatctcccaaatatgattaacgttctactattttcgcgca  
aaaggtagaaaatggaggtttctattctttctgaccttgacaaatccattgattgcaactgaccgtaaaagcacctaattgacggcttttggtgcaa  
aaaaaagttcaaataaataaaaaatgccgtttgctgaaaagaaaagaactcaagatgtaaatgtgaaaccgttgagaaaatcaaggatt  
ttgcgctatgacttttgtgtagcaaaaatgcgagactgttgtaacaaaatattcagcttttcgatccattggtatgtttcgaacaaaataccttt  
gatatagaagttcgtggaactcatttcttgacaacatgtgttgaaattccttcagacatacgattgtgaacgactaaatctgtgtttgctgg  
taaaacactggagcgagaaaatccttgcttgaatcgtataaagattttatgctagcaggatctggcttaaaattttgcctacaagcgaggtaa  
gattgtttgggaaatagagctggaatcgtctgctgatgagattttgacattggatgcttttggtgaatggattattgcaataagcagctactcgccatg  
ttcatatttgaagcatgtttccaagtatgaagtaccagaattgcatacgatttttaacctactgccaatgcagacataacggctttgatccacct  
agcacttattgaacaaagttgtttgggttctctgacggttcttgagttatggaatagaggacggcaaaagtcattcacaattcagtggtt  
gagaggcgacgcgatcacctctcttcaagctcctgacttgatgtctcgcctattggtgctgcaaacggcgaattttgcctataaatttaagaa  
aagctgtcactttaatggagtttcgcaaaagcggccgctccttctctcctccggacagatggtgtacctattctagcgacatcgaatcaca  
ggagacatctctttatgattgtctaaacgtcgtgtccaaaatgtgtttatggagctcatcatggccccattccaagctcagttcttaaacggt  
cagccattattggttactaccggccctgacaactcttaagaatggatctttgattctatggatggtgttcccagagcttgcgttttcgcaatggc  
cattacgaaccacttcttatattcagttttatggtcaaaatgtacattttctgcttctgctgccaactgataatacactacgtgctatcagcctttcc  
aagataacaaactgttgagctttccagggctctgtaacttctaaagcaaaaagctaaacgcccgtccagatgaaactaaagcttctgaaata  
gtatccatgtctcatctaatacccgtaaaaaactgggataacatttctactgctataaaaaatgataatgctgctcgacatggagctggaaa  
aacaagactttgggtcagcacgttctaccgacgacagatggtaccctgttcgctgctttgcttagttgtgtgtaactcggataggtcggtag  
ctccaagggcttagttaatgtttataacatgcaaaagtggtattttaaggaaatcctttgctgtaacagcagagactaaagcctattacgtctatt  
atgcttgataacgttaatcgagtcttagttacatcttcttggatggttaattacgtttctgggattcaataaaggatctttaattgataccgttgaca  
tggttagctctatcacgaatgctatttaccatcatacatcagatcttatagctatcatttggatgactttggcgttcgcatcgttgatgttcaaaaa  
ggaaaattgtcgtgaattatggggtcactcaaatcgattaactgacctgattttccaatgatggacgctggttagtcacatccttagatgga  
accatccgacttgggattaccaacaggtcatttgattgatccattaccactggttagcgtttgactggtttggcctttggacctaccggtgatta  
cttggcaacctctcacgttgatcaaatggatcagcttatggaccaatcttcaatgtttaagcatgtatctacgaaatcgctacgattagatgatg  
taaccgaggtttcttccctcaatttctggcgaacggggcacttcggttagtacaggctgcattgaacgttgaagaaggaggtagaagaagat  
gatatctacactaccgctgatcaactgacggcattgcaaacctaaagtaaatgctcgaacacaatggcagactcttgtaaacatggaa  
ttgataaagctgtaatgctccaaagaggctcctaaggcaccgaaaaggcactttcttttggcatctttaaaggaagctgaggggctt  
gtttcgaaggctaatgaacaaataatgatgaccaaaaagacaaaattggctcctcagttcaaacgttacaaccagattttctgaaactttg  
catggtggagatggttaagtttataaaaaactgtgtgtaacgtttgataagatttaataaattttaggcgatgctgttttgaatattgaaaga  
ctctgccaccagctaagactgacttagaaattcgttcttgaagcgtaccaccatacgaagaattcattttatcaaaagatgacatcccg  
gttagcgagcctcgggactttgagctggtacaggcttatatggcagtttcatcaaaagccatgaagatgtttgtgtctcagattctccagaag  
aaaaggaaaatgtctgaacgcattgaaagcttgggatgtgtgcagaaagaagaaaacaggcgtctgctggacttggtaacattattgctctggt  
gtttgagtttcatgcaactaaatgttttgcgttgatacaaggggaaaaaacgggttaaaaaaagtgtagtgtgatgactaattgtttat  
aaactataattttgggtcaaatagaatgcaggtttattagttattatcgacatgaggtttctgaaaaactttaattgctaatttggcagatattg  
taaaattaataaacttaataaaaacagaagatgctagaaaaagacacagcatgtatacaaaataaatcgaacagctcacagcagatata  
ataaatgaaaactaggataaaatagttctcattgtttacaatagcaacagcagctcccgtggcctaattggctagggcatttgacttcaatcaagg  
gactgcggttcgagctcccgccgggagctttttatgaacattcattctctcagaggggtgaaataatgtaattaatttttacttaattgaa  
aacagttttattataatagttgaggttcttaaatgatcactaagttctattctcctcgttattagttaaacaatgaaagcgacattttcacga  
aatagtgaaatcaccaaaacaaatgaaagtctatacattccctaattctgtaaatgttgcaactaaactgttgaaaactgacaatactgtaca  
atattaaaatttttatataaaaaacaatgggtaatccccaaaaaaagacatcgaactcccaccatgcagagaagattgagccaacgcaatg  
atcgatgcaaaatcattgatccagaaaaggtgaaagcaaacatgaagacacaataaagtatcgcttaagcaacatcaaggaatgcaaaagt  
gtagacattattattgtttcatagagctgtaatccctaaggatattaaggtagtatttgaattttccacgtctagttttggttcttctgtttctgg  
gcagtaggcgagctcgttctgtggttgaaggatctacgcttgcggttcaagccatatttccaagttcgacgccaatccaaggttagga  
ggaatgggaatttcatccagacagtttgaattctttgctgataaagcaattacagcttttgcatttctcaaacatcctaggaattcgtccttt  
cgtgttctaataagcaaaacctcccctagttttcaagctcttctagtacgactactacattcggccatccgtcttaagctcttaatactcattctg  
tatgtgtcttctgggaatctaagtaagcaagagaccagcggcagagcgaatgttatgtaaaggtttaaagcgaagggttctgttcgttcatcata

ataaatacggtcatttttctcaagagtttaatagcatagggcgtcagcggcgtcgagaggtacgaagcaatcttctcgcggttttaggttcatttc  
tctcttcaaatactcgacggcataatgaagctgagataaataatgggttccgaccccagaatctgctggttgagagtacactgaatgacctagtt  
agtaagaaggacccaaataaaatgcgtatgttctctcagactttacatacccaaattcgccttagagcgacgttcttcaacgtcaatccaggg  
cttgaaactgccaagcaggatcattggagatttgagcggcactgggtgctgggtgatgctgatgtatggacttgggtttgcatagacaggtt  
gattggcgactttttctaaagaagataattgttcacttaagaactcataacagcctagtaagaacagaaaggtatattgatcaaaacttct  
cgaatccaccaatttgtcaatatcacgacaaaagaatagctactaagaatccttctcagctattttcaaaggaaatgttctcaaacctg  
ataaaactaattttagtcccaagatttgggtgaatccagggatattggctaatggcaagtttcatttaccattccaccattaaaaatgcaaaatgct  
tcgtttacctttataaggcgttaaaatggtagcgtatgcttaaggaaacttactctaattgttttagaacgaatattgctccctcttttaggaattc  
tattcgttacgtttgagaaattactctcgggtgtgtgtttgcaattcacattatacttaggcccatatggcaaaattataaaaaagaatgcaaaa  
aagatatccagaaaagcatcaaagtccttctgcaacgagctcgggctattcacgatccgacgatattcgtcagatgtgcaacatctctggat  
acaatgttgaggaaacaccttgaaggactcaggatgattacattctttgtattcatagaatttcaaaggataaaccaggaaaaatggcatgcca  
attcctaaaaagttacctgtgtatcatcattggactattaatgaattctgaggtgtgggtttgtaacattgatcagaggaattgcttagtata  
tcaactgttgaccaaggatagattgttgggtaagtattttcttcgcatctggcagttgggcttgataagttcaaatcatctttctagcatcgac  
atcactctaacaatatttctgtagcttggaaacaacagaggaaataagtacagtcgccaacatctcggttcgattctacagacgtggactttgg  
aactttagcattgatattcgcctattacgatattccgatactattgattatataattgaaaacttctgaacaaaaaactaacaatattggatt  
ttctcaaggaactgcacaagcatttccgcacttagtctcagcctcttcaaatgaaaaagtaaattctttatagcattggcccgccatgagat  
ccgaaagggtgcaaatcgattgtatgcttctgtaaaggcagctccctctattttcttcttcttggctgaaagtcgatactgccgtctgct  
ggcttttggcaagtatattacgtgagtgagaaaaattgcaatttaagagaaaaacttagttcaacctttcattcagcgaatgtgcttttaacg  
tatcttcttctgcttgcacaattgttaactggagctgtgaatccatgtccccgttgaacgacatgcatcatttgcgatttattcgtatataca  
agcgtaaaatgtcttcttattggttccaaatattgagcagtgagaatttcaatgtacgacaatgatcaaatgtccatgattactttccaaca  
ttatagagctgcacgatttccgaccaagaatattcgtactccaattctgttgttttggggcattcggattcttggtagatattcaaccatgttga  
ttctctacctctatggctgagcaaatagggttaagttactttcttatactgctgacattctcaatagattcctggatagagcatttggacatg  
atatgggcagatacgactcataaataatgtgattcctttagtctggagcgtcttagtatcatctacgtggaacacagctcaaaagaaatgctgat  
gaaaaggctgtaattctcataaaccaagaaaaaagcacacgaagaagacctagattttcaagaagaggaagctgaagaagaaagaa  
agggtgaaaggctctcaatagtaataagaaaagcaaaagaaaaatggggatcgaatttggatgacgaggatacgaagaactttatcaatcta  
acgtgaattcaatatatgaaagatgtatcagaatatagttacctgtgtattgctgctccacctataatgttcttctgctgtttatttgtat  
aatatttaagtcaatgaataaatacatgtctttatttctgatcatgacaatgttcttcttataaataatgtgagtttccatataaacaatccata  
ccacttctagatggaacgcagaatccttgaacgctccttgggtttcataatcaagacattgatataattagcgcataaatactccaacgcttct  
cgtaccaaattgttattgcttctcacttcatgtttatcatttataatgtccatagttgaaattcatgaaaacaaatgcgcataattaagaag  
gcaaaggctcagtcggcagaaaataacaccaaactgtattcctaaataaaaaattaaatttttaaacattctttcttctcattcaagagc  
aagcagcaaaaaatagacaaaggatttgaattattatttatttatttacttcttcttcttatttccacttattatctactaagatcaaccg  
aatgttcataataagcgtctttgtttacattgatttgaacgaaaatttcttagcggtcacaatttagcttgaacgtgggtttcttaacactcg  
ttgaacaaacctaccctcagtagaaaaacagtcacttgtttttctatataagggaagatgaaactctcaattccatcatcagtaggattt  
aacttactttgtatataagtaagtaaattcaaacctgaagcaagatgatgggtggagcttaggacgaagaaaatgatccgttccgtcttca  
gtgatgaattgagtagccatccggctgttattgttccatcttcaagggtggggtgtttctctgacattttgttttaattcgtttgttattagt  
cgttgaattgtttatttagaagaaataagagtgaaagattggaatgaaagttgtattgtatgtagactattgattggaacggaagttgatctgg  
gaaacgaagttaacttttaattgatttgggtgatggagatattgttattgcttggcaagaaatttagtcttctgggtggtagattat  
gagggcttgttctgattgtgtagtattgagtgacaagcttgatcaagcgtcgtgaaagcaccattaatcgtgtttgattgagacatttcaa  
ttacaaaaaacatgtcccaagaagaatctgttgaacagacatgcaggtagcgcgatgagcaacagcaagttgaaaagaagttgagttaga  
aaaagtaattcaggaaggatgcttcaattacattagcaatttcttggatttgtttgcatttatgataaagcaacgttagctaatgcctcctttc  
accatagaatataaacttggaaacaaaacgtacccttctctacgatttagttattactcatgccctggagtgccctctttagcgggtcagtggtt  
accagataaacagacgtatgtagaaaaccttcaatgggtgaagcaagttgctttttagatgggcatggaacgtgtaggttgggttgggttta  
actcaatccaacacgttggcttccctccatttttctttagctttagaccacttgcctcatctttccgtatttttggcttgacattgtcgaactgtt  
ccatctttattaagcaagcatcttattaacatgtgactatagggtatcaggcaagattattctgttcaacggcttctcttaggaaccatacttca  
ggcatgatcaaaattatctgaagtggttctgtccaatttgcgaattttagcaggatactatcgacattacccagctaatgttcgtagagccc  
aacgtgaaggcttacaacatcgaaattactcaaaagatttgcagatggcgaagtgaaatcgggctcgtatattgcctcaaaatcctgacattg  
ttgctactatgggctgtgctgaaattcttatatttttaacttgaatgatcagggcgtttaccaactaacaattctttaccacaagctatccttcag  
gtcatacttccgaaggatattggtcttctggtgaaccctaaccaaactggccttagcaactgccgtgaagatcagttcatttgttatgggacat

caacacatcctcttttcagctaccagtcagtgattatctctaccgcaaaattcatcgacattctgatattgtaaatgatgtccaatatcatcc  
tcaacatgaagcccttttagttcagtgccgatgactgtactttacagatacatgatactagggttaaacctaacgatcgcgctcctaaggatttc  
acgctcactcaaaagccattaatgctgtagctattaacccttttaagactacttgtagctactgcaagtcagataaaacagttgctctttggga  
ccttcgaaatcctcatcagcgcttatactttagaaggacatgaggacgatgctatggcctagagtggtcctcatgacgaacctatgttggt  
ctagttctaccgatcgccgtgttgcatatgggatcttgcaaaattggagaagaacagtcctgagaggatgctgaggacgggtgcctgagttgt  
tattatgcaaggcgggcatacaaacagaatttcagaatttagctgggtccaagtgagcgtgggtccttgctagtttagctgacgataacatcct  
tcaggtatggagtcctccagagttctttgggctgctgacgatgtacaaatatcatctcgagatttagagtaatacaaaaaagaaaacatgactt  
attataaaaagttgtatacatttttagttcaccatctttcaaaatagcctacgaactaaccaatacatgattcctcctttattgactattatacggct  
cagtagtactttttagaacttataaaagagtgtaactatcatcactaacaaaacgtgtaagaaatagaatcaaaaaataaaccaaaaa  
tataaaactttaaaggaattaacgatgtttctataccagttcgtttgagattgtataaagacgtttgtaaagtttttcgaggatttcctttgttt  
tgcaaccgttgataaaccttgaaatagatttagcaaacagcaaaaacatattgctgtccactagcagcacaacataataaattatggcaga  
cagttataaagattctgaaagctgttgacgtaggcgttaagtgaaacattctcataaaataattgtttgatcctgtagcttgataagagaact  
gtaattccaacaaggcgaatgttacagtaaaagacacatttctccacattctgtctataggaggcccaacagtcatacaagccctatc  
aatataactggaagcaggaataaaaaacaagctgttcatcgctgttgccaatgcttgattttcggatccagctgaggggggatagatgac  
caaggctgctggcggacgagctagaatcatatactgaaatgagcagatgaagaagatctgtccaattaaaggtgatagaatccgtttgaaa  
ccaaattgtgtagagctttccgagctagcctgtgataaggcttgatctccataaatacggcaatcggtaaaaataattgccaggtcaataa  
ataagaattgaaagtcgctaataatagaattgtgtatacaacatactgacggttaacaaattggatagcagaataaaagccatgtattgaaaa  
caacaaaactgttaccatgctgacgaccgtctttaatgacatctgacgcaagaaatctcaaacaccgactggtgaaaggagcagcca  
cggaggtcagctcagacagcgaatgccaacgtcagcagctttaatgaccgcagtcatttctccatcaccacaaaaacacgcagtaa  
tctagctttggaagcatgagaccaactgcttctttcggaaggagacattctgcaaaaattgtgattttagcaaatgacataaaaatgctcag  
cgggagcataatcaactaacaccggaagacatcacctgttatagccatgtgtaatttttaactggttgaactcagttgataataattcagatt  
tgcggaattcaccacaggatgaagggttagaggatccaagtaaacctcgttatctcaattgactgcatataagttttcgagatgctatatccca  
atggactcttctcctcaaacctggtgataaagaccagaccatcttctggaagcataccgcaccgtttaccacacatatagaggccaatagctg  
tcacctgtacacatcacagtcgaatgtttgcatcttctaattcttaataactggaacagtagtagactttaattgtttcaaaaaataaaccc  
acaaaagtctaaatcagattcaactgtgtcgtttcatcctttgtgctttcgccatgtacagttctcaaatgtttggatgcacaagcaataactc  
gaaaaccattatgggtatagtaatacctctctgtaattttcaggaacgactcaggcttgagatcgaagacataaactcaggtgcaccttt  
tacataaatatccattttctacattgcccattgttactattacagccatgaggcgaagttgagatacaaacctgaaagttcggattatgccaagtt  
ccaaatcgctttcggaaataatgattgatggatggtccatggaggtgatacagtaggtggtattaattgctgggttcgatgtaagcggcatctc  
agattgctcagaagaagtcattgttctgtaaaattctctccgaatgtccaatccgtaaaccaacattttcaaatcaacggatctcctagca  
gttcaccgtccacgcgacgaagcatatgacaagtagccattgtaaacagtaaatagaagggtatcatcagaagaagcctttgacataat  
ttactaggattagttcgtagatcacttaattttgaaatctcaataacagaacaccataaatcaagtcctctccgtaaggttccagtttatca  
aaacttatgagatcaagctttcacttacattcacacgttgaggactgatgcaaaaaatccctgccttctaattgaaattgcaaaagtagtac  
cgattgtaagagttgcccgttaagcaggaggaacgacaattgtgattaagtctaaagcacgaatgatgatagtttaacaggtacacctatagtc  
aataaattaatagaactaaaaacaaacccgacaagagcagataataaacatagcgggtgataaatcggaagaatcacgataaaaagctaaagtt  
tgtcggctttgaaaaatcatggatcgaactaaggcgtttgtggtattgaaaccagtgcaacgacatggcgagagaagcacttctcttt  
ctcattaacaaagggttacgcactgaaataattttgtctccgaaaaggaaatgttttagagagagaaggaggatataatttagaaaatgcaa  
aaagatctttcattccttgatctgtagctggaatcttgaaacgggaatggattcaccagttaacatactttcattacaatgagtcacctgaaag  
caaaagagcatcggctgggaaaaccgttagttctggatccgagatttcaaaaacatcaccaattactaagttagtaggaaatgtagcccaa  
aagccatcacgataaacacgaacgggacaggtaaatcgggacatttgacgcatacgttcaaagtcgtttgagttcaattaagcttcaatgat  
agataccacagaaatagtaaaatgcaaatagcatagtaataataagcatctaaagaccaaaggataattgagaaaactgaaaaatataaa  
aaggatgcaaaaactcatccaacaaaagctgaataacacctttgaattcaaatcaatcaaatcttcgcaaaaatttttagacgatcattgatg  
catcacgttcaagccttctttggcaacgttggtatcacgaatccagcggatcctccaatctgtgtaataagaacgttccaagatgggatg  
gaaaattaactcatgtagcgatagttacatagcgaagttttcaacgaaaggatcattatcagtgcttccaggttagccacacgaacagagg  
caccgaaaatagatgaaagagaattctcataaggtgaaactgaatgtcatacctcgagatctcacccttaggttcaatagttaaccattccg  
cagtagcagcgggttcacgtttaccaatgaatcgaatgtaatatctaggagccatctcattataagataaacaagacaaaagtaaggatacat  
aacatgttgatattcttagcatggagttgttagtctgtatccagcaattcaacctcgagatcttcttaccacaaatacataattggcagatcca  
tcatcactaaagccagcagcttctccgggagattcacgtcgcaaaatagggtgaaagtttaagttccttagcatcatctctgtaattcttctcatc  
actgtaaacctgcagaaccattttcacgaaaaaattgggttagtctacgctgtagctcggcgatagagtcctgtcattatcagactcaagtt

gtactcagattgcaaatagtccatgctgaattgactaatactagcatcagaagaacctggtgagttttgtaggaaactagaatactagatgg  
aacgctgttccctaaagccaggaccatcaaaaatactgtcatgactcattaagaactcgccaaataagatttttagtatttcttgaaccagcga  
ggtcactgagttcttccccgaattgatctaggagaagtcattttttccgttacgatctctgaacccctattacaatcaattcttctgatctt  
agagattcgtaggatgctgaatgtaggaatattgaaccagttacattgagaacatcgtagcaaaaaatacaattgtaataacgcgattg  
cataatgtatatgattataaagaactttattaagaaggaaacatagataaataagattataagttctcgccttttctggtttgagacttt  
ataaatgaataaaacgcctttaaattgtatttgaatgtaacagcttctgatttgaatattcgacattataaataaaaccattagtcfaatgttac  
ttcgagatctcaaagaagacatgttcccaatagtcacttatatcgtttccatttggatcttaaaaaggtagataattctttaacaataaggtttctt  
aaagtttccgctgtaataaaacatcctacaggattcatttcaatggcatttttctgtgtataatttttcaagtaattataaaatgaagcaac  
ataaatggcaattatatttggggaataaggaaggcaacataccttgacagattatattggccatttgaacaagaatgctgcgactaat  
ttgagagagaatattttagctaggaaatgctatactagcaggtaggataaaaactttttattccaataccgaaccattgagttcttcaacgta  
aaaaagtgaataaaagcattcataaacaacgacatttcaagaaaagcatgaatataagaatcatttcttaactaatgcagctataaagta  
gaagagcataaaaaacatttccatttttggcacgtaatgaagcttctaaacagctataaacatttggtaacggagaaaaatcctatatattg  
ttttactccaagtcaatagcatttcttctcctgaaggattggtaaacagggaaactcatgagattagccaagatattgggttgtgattgacagga  
cgaatgccaaaataaacatcttcaagtttgaagacctaacgagttgtagagattttttagacttaagtttctaaaaaggacataaccgact  
cccattctggcttcttgggtatttttgcgaaagcgaagataagtttcttattcctttcgataagcagcaagaacgagtaagtgtaagtagttgag  
aaaaggataagaattgaaagttggaacccgaattccgtcaatgggaaagctcttctgggtgaatgctcggagcgttcaacaactgtacaaact  
tggttaaagattgaagggcatcagctggacttccgactaaaagataattgagaacggcacgtccaataaacaaggcaggatcttcatctttgaa  
gcttgggccaattatacagcattcagcataaaagcaggacattttcatttcttaatacaaggtgtcgttctgcggcaactggatctcccctat  
ctccatgtcagattgaaaccattaagagaaataaagaaaaataaaactcacatttataacataataccaactgatgcataacatcacgatc  
ccctgaggtcctgtagagttgtccactgaattctttagctaccgatatacgtttgagcttcttgaacttaggaaaattcaagggccttcta  
ccgttactgtcaacatactcaagaagcttctcagctattgcttttactcctcctcggctggaagcatccaagaagagctaacgctttttag  
tgaacttggttagatcctatttctgtagagtaattctgcagaattcaaactttgttatccatcgacacagagctcgacgcctttataaaaacatcc  
accaaaataaattgataaattcctcagcgttccagtttgttgcagttcgaagagagcttcttgcgggagtagtaaaagcaattgagtcatact  
tcttagccataactgtctgatcatcggttattacagccttaaagaaacaacgaacctattaactaaagtagcaatcatctgatgccttataag  
ggtcttctgtaatctatcgcgttaactttcatgttctggtttataatgaaaataaaaccttgccttctcttttttttggcttcatgacgct  
cataatttaataaataagaaaaatcctaggtactagcagcagcaaaatttctgagaattcgttgggtgtagaaggtctatcctcaacgactt  
ccatattttgaagtcatttccgcataaatcgcaggaattctgaaagccttaattatataataaccaatgtattgaaatggactttgactgttg  
gaatttgtaataaggtatttaaatccagttgttttctgtaataatgtagattgctactattgaaatgcaatggagatacttttagaccatttacc  
gtcttataacgttagcttctgagaaaaatcaagagcagcaagtgtaaccaagactcaatgaactagccaacaagaatgcaattcgcgttgaaca  
gctatgcggcaaaaatacaagtataatcaatcgttttcaagcttttcaacaataatagtagctttagtaaatctgttcatcaactttccgtc  
gtgagaaatgagcttcatagctcgttctcatattgcagacttgaatactgatattcaagcagcggttaaggattgaaaaatcatggttaagtaa  
gaaattgaattagaaaacaagtattatggtcaattcactgagtgagctactactaatctacatcagaacaacaactgaattcattgagggactc  
tgaacggaagctatattatcaagactgactcagagctgtctcagatatttacaagctgaaggatgctcaagaactttatcaaaaaagca  
atacttaccatctttgaggatatacttgaagttcaaagattaacttaaaacggattgaaggacttacgttactccaccgttcagcaaatgatc  
tctcgaatgcaaaattctgtatgcagttcggcactagaggaccttcatgaatggttgttctttaaaggaaaaagctaccactgttaggggaaattt  
gctttaaagaaatcgacgaagctcgaagaagatgggcaagaattaccgagaggacttgaccaacttactcagaaaacaccttttcttggat  
ttagcaattatggaatgttagattgtaagtaccatttgcctaagcttctgtcaacataattagttgatccttcaaatgatttgggtcaggttga  
ctttattccttgtatgtttgtacaggttctcgtatttgggaattcaagttcctttaggcgtcattttagaaggaccgaaacgacagcaag  
aatttttagctcaaaaagctagagtcacatgatttggacgttattagtgaaatggttgaatcagttgctggatacatgattgtcgaatattatc  
ctgcaagagattcccaatttccgatcttcaagaagaagcctcaaaatataatggccattattttagataaattggtcgaagatcttacagtggtgat  
ttcagagcaaaagtacaacggcgattataaagatgaaaaataatattgtttactaatgcacacaaatggaacgttttgggttcccaacgcataggt  
tacatagcttctgtggagttgatagacgcttttggaggagcactgatataaagcactccgtgtcttgaagaagccttgacacagatttatac  
gctccaatggtgatcaataacgaaaaggatgatgaattgatagctccttactggactttaccaccggcccttttctcgaatggttgaattt  
ctaaaatgtgcttcttgtgttattacactttcaaaattcgtcggcactttttatgttctctaatgactctatcacgttggcgttggacgttcagga  
aaagatccaagggtagaagaatgcaagattaagtgtacaataacaacaagtttatagaagattttttgacagcttctttagataga  
ctcaaacatctttatcaaaaactaaattgtcacagatggctcagttagtaaaaaattttatgcttttaggagcccttgttcaaatggagaaga  
cgttgggtgataagcaaatctacttctcatgctggaaatgaaattactaatgtgaatatcaaatctccgaactattggaaggtttagcaaatgcagc  
caagtctgccttcatgaaattttgttaaaattaaccacaaaattgatgatttcttgggttggctgaatacagttggtatgtgatcttgaaca

ttttatgaaattctaataagttcattaggtcgactacagtgcctcgactgctccaagcggatTTTTGcaagagatggttccgtacctacaacccat  
ttacctgattccctagcaggtcttctaaccatgacaagcttattgtgtacctggaaactctagaccattatgactgcatgattgacttactttc  
aaatcctgctattcggaaaatatctactgcagcagcggagggttaaagtcgatgttgaatattggaaagcttggctcccaggtaccggacca  
gagcattgtgaacgcagatagctttagagctaagacaatgtccaattactgttaggagataacatagaagattattggacaccgacaaat  
tcaactgctgactttaatcgtttgcatccatcgacttccgtgaagctattagagaggtattgaattttgtgtgagagaaactaattaaccaattt  
ttaggctcattagcagttattctgccaaccgtaagtaatgatcgaccgaagcgtagagctatagaaaacctactgtgtatttcgacgaaaa  
caaattgaatgcaggaaagggtttcgagttttatcgtttcatgaatggatacgatttactgctaaagattattctagatattatgagcttat  
gataccataaaaaatacaatgaatttactgacagttttcgaacaagttgaatagaatttcattgaagcttatttgaagatgaaaaagaa  
gaaaaaaaaaaggtaatttcaatgaatagattttatttactgaacacaaagtactttgtaagacttagtgcataacctgtcaaatatata  
tattagtttctaactcagggctccgaccatccactacattcatagtagagttcggtttataaaacgagaatgtctttaggaactttatacttt  
taaggacaatactagaactgtttgttgcctgaactagctagacgtttgaatttacaagttgacctgttgaacttatctcacaagttccctgccg  
agttggctgcaaatccctctcaaaaggtaagaaatgacgaggaataaaaaataaaatgaaagatgaaaaactgtgattggttaatttat  
gaacaacaattctataatcagtgctccatttctttctcttctccttgaagtttacttttagcgtttatttgacactactgtatcttaagtg  
tgctttttactgactacgtggaaaaatggatgcatgagaatgttctgtctgtgttataatattgcaggaaaagcttactcaatcgacctcc  
ctacatattttgtttgagatgctaaatcgagctccctgtattcattgggtccaatgggctcgaattgagcgaactcgtagccattcttaag  
acttctatgaagtggaagcagaatgataccgagctacttggtgcaatcaatgcaaaggaagaagccgaaattggcaatggattggatgt  
gaattctgatatcgaactcctctgtcattcgtccctgggtgggcatgtgcccaggtgagctccttacgaagaaagccctcaaggagtctagc  
ggaaaggctttgggtgtttgaagaaattaatgatattgtaattgaccgcaccttttgggtgtaaccgcttcaaatgcccacttagttggtg  
agtattgtacgctttctatcgttcatcgttgacctgagcaacttcaagctccctcattgaccagatattatgttaccatgttccatcaaggt  
aacttatgaaattatcccttgaattgattccttctgtagttattgcaaagaactaggcactatttttcaaaaagcagtgaaattactgcgtat  
attgaattgaataataaataaaaattgattttgtaataactatgaaatttgcagtaaaaaggagcgtatcattgttttttagtcaag  
agactgtgagatcgtgaatcgtaggaatgtattttgggaaacaaaacacaggcatgttatttagtaaccatcacctcctaaactcaatc  
tttttagaaaacgcatcctatttctttgctaagatcaagcatggctcctcctctgtggactccaagttttacgtttagggcccattcaa  
agtgttaggaccactagacagcttagcaaaagaaaattggcaaccataaacatcttgattgaagactagagctcatctggctttcgaagaat  
tactaaaagactcgttggactgtagttgaataaaaacaaccaagacataactactgcagaaacctcaagccctcaaaccttttt  
gtttcatctcttgataccattgttggctattcaaatgtagttgacttacctaactggggatgagagccagacctgatgtgctgggtgtttta  
ttaataacataagttaccatgatctcaagattcaaagttattacgcccctctatgcccctcagttagttattgcttctttcaaaaaacaacac  
ggacttaccgaatattcaatgtcataatcgtttctccagattgttctagtagatctcaaggtattgtttaaaactcagcgtatcgtcagcagct  
cgggtgtattccaagtcagacaaaggtccattttgattacagttgacaagaaccttagacgaaagttccagccagcaagtgagcgaagag  
gtcgaagaatgaaagaagcttttcaaacaaatctcctgtaagattgcatagaaacaaaaagtcgagtaaaaaagaaatcacagaat  
atctgacctaaaaagtgatattcaaaaagatagctctgggtaattcaatttttaaaaaacaagaagaaaattgtaataggagtcgaggtatt  
tgggaattgaacaattggtaaaactatacgttatgtagctgagtttagtactcagctcttataaaaaagcgtgattactcaagaatgagc  
aacccttagtagaaaggtttgaatgaaattgttacaatgaagaattggataattgagatagaaaaaagagttttattgagctgttctgta  
attcaaaccaagaaaaatgagcgtacttctattccaagataaataaagaagagaacaaaagttcagattataaattgcttcttttctgta  
cgtgttcgaaataatgctttgatgtattgagctatgcatccagctctatagagtttagccaagaatctataaaaaaaaaaaaaacaatatca  
atatcaatattcttattgatgcaactggaccaaccgatcaaacctcgaatcaggtatataccaaggggttgaaagcattaaaacctgaattt  
ggaggggggaataatgaataaaagatgaacgatcaaaaaatagctgactcacaattttcagctcggagctctgagttgtctgctgggt  
tttgctttctataataccaattaagcagccgataggaacaactctaggcttatttctccttcatcatattgtaccttaataaagattctttaa  
acatggctcttgattgaaaaccgatatattttatcgaattgtccattatcgtctttacggagctttgaaatgaaaaacctcctttccattgac  
ataattggtaactcgaactggaaagcgtaaaaacgattataattttacaggctcagataaattcacttctcaagattggcaggattgaattta  
tgattctcattgtcgggaactgcttcaaaaagactgcaaaagctggattctttgtattttctgctgtagaagacattagctgtatagactgctggga  
aatttagaagaggcatattgtatagattcaaggagctgaactaagcttaaatcggcgtcacctatatttctcccaatggattgctttgtc  
catcttttcagactaacaattgaaatccaaaaattgacacgtgttatgatacgcgacaaagacccctccatgcgacctaatcgagcctgta  
actgtattcaaaaaagcagaccgaatcatatcataatattctcgttcataagatacaaaattccgtaattttgtcaagagtataagaatcatag  
acctcaggttgagttgattaagacgtactccaagtacagctctgttttcaggtcaaagacccagaattggcaaagccttgcgaagcaatcta  
actgagatcgaataaggaggtccgacattgctatattgaaatacatctattgaggtttgtttctggttaaattttcattttcagataacgac  
cataatctttttctagagtgaaaaagcctcctaagactccctatactcataagaattgtattctggtttttgatgataagctgtgatctc  
gtcgatacaatacaagccattttggttaggataaatgaacggagctaggtgagcgcataaacgagtgtaatgctgtctttttgtctacacgaaa

ctttttgataagcctaaaagctcgggtggttccacttgctaaggaaaaaatgaatttgtagagtaaacctgtcaagaactcgttgatccagc  
gaacttgaattagctctatggccagcttctcaatgctgtatcttagaggggggataaaacttgcttaagaggccgtagtaaagctgcaact  
ggtgtcaccttcgataaatactcgtcccagttaaattcttgagtagtagggctccctcaaaaatcaaaccgattgttattcaaaactgtattcaattg  
atgctgtaattgattacttctctgcttgacggtgttacttctacatatgtagcaaatcatcaaattgaatctaataatcttacttgaaaaatct  
cggcgcgagaatcaattacgcccgattgaagcttttgaataaacattcttttagtatgtatgaacctgaaaccttgcgctccacaatgataat  
agccgcaagttgttctcaattaacagcaacattccatcagtttcggttttttgataacctgatttcttttcataaaaaagaaaaatagtttttt  
tgcttcaaggactcttacttgcgtccatacccttttattcaacaatggctctattgcttggtatgttataaatgtaggctatatggcaaaagtgcagg  
taaatgtgagtcgagctttaaatacattaaaacgttcagagttataaaaaataaataagttataataaaaaataaatgaatattaatcattg  
actttccaaatcattgctgacttttacttcttccatagctgtagaagccattgataatcacaatttcaggattgatttgatgactaaagggtagaat  
agtttgatagattgaattgcaataccacatacaattcacatgctcgtcgtagatgtagcagcgcgatcctgatcgtgctaaacataattatagat  
tagttgttggagaaaaagattttgacagagaagcggctccacgtcagaatagttccgccagtcgatactgtgatctttaaagactgctgtctt  
ttgaaatttcaaaccactgctgctaaagtaagcagaatagagacagagggaaatgctccaggaaacgatgctcccttgctaaaaggtgcttc  
gaaactaaatagatttttctagatctctctgggatataaatttaaatctaatcgtcccagtttagtcagtaattcagaaagactagaattggttaa  
gcttccaaatctttctccagaatacttttcttttgaatagcaggcttctatgtagattcagtcattgggtttctttctacgtactatggctg  
tcagcaaccttcttcttaattatgctgtccataatccattcaggccgaaatagggacacattcttttcttccacaagctactctgttgattc  
tagcgcgatgtaataactaaaacgtgacgaatcacttacttcttccgctactaataccatttccctccggaacggaagtaactgcttgatggat  
tgtgccaccattggaagcaattatgcttccaattctgcttggatttcaagctttgacggaggaaggacgactgcttgtaataaacgagcagc  
atacaacaacttaccaaaatgtagcccctgaaatagctagacaatggagtgagctgcttagcggactattaattgatgtagaaactttttc  
cggctgcttttccgactgacttttcttttttcaacatgactaaagcagttagttatcatatcaaaaacgctgtaatttctactagacatctt  
tttctgattttcagcgtactttcagttcaaaaaactcattatagacagagcatcttccagctcgcacacgaattttctccagtcggggaa  
atcgcaacgtatacgtagctttaaactgacttataaaaattagaagtaagaattagaagcaagtagattataacttactagaaacgacaacttc  
ggcagctttaaattgaagtacaagtgaatcttaggatgaatccaaacatcgggtttctcaactctgtctgctaccagctaatcaaaactct  
aatgcttctgaagaccatagctgccatttctcctcagctccttcttaataatattagttagaattgaaaaagatttgatgtagaaactttttc  
atcacgatcgaagtaagtaaacccactccaacgcaacgaatgattgaaacctgggttattagaagttagcttaaaaaagcttacccttgat  
atggctcttctctggagcatgatcaactcgaagaccacaaaaagaggaagcctgtttggattgcttaccagctcaaaataaccacctgat  
attaattaataaatttttctgcttgatattacctaagaataagacaatccagatcttattctcctcgttaattatatactcggaaaagagtaa  
actcaccttccaaatccttcaaatagtaggtttactttgatccaatcatcattcgttctccagtcgataagttccagaaggtttctataatgt  
aaatataattctgcaaaccaaaagatcttactttattaccagaccctctgatcccttgaattgtttgctgtagttctcgatctatatacctaacagt  
ttgtccagttttatgagaaagtatacacattctcagattcacgaaacgatcatttctcagaatcttatgcttcttcaagggagtgctgattaa  
cgactttcattcaggtatagtatcaaacacgatgctataaagaacttaagttagctatactattcaagcttccagtttcttacaataa  
gggtaatatgtaggatgagttgatgaagaatcaaatgtgctccttaagctaccataaggaatgatagtttctaattggatcccaggtaacatc  
tcgcatccaaaacttgcgagaccgatcatcaaaagctcaatgatataattgagtaagcttgagtttcatcatggtatgaggagccatag  
acatccgtatatgcttgcatttgcactgtagaattgaaactttccatgctcatatgtagctgtatgctccccatccatctttcttcaatccaaa  
aatgttctactgtgcatggcctctagcacaaaatcaagggtcgatttctaaaattggccaattgtggctgaaaacagctaaaaaactcaacatcgg  
tatccaattcactaagacttctactaggatcatacagctcccaagcaatacgtttagagaactgcagagacgatacaatcgagctgcatctgggt  
gaaaaacgcttaataaaacttttccaggttccgtattttctgactaaaaaaaaaaaaaaaaaaccattagcaaccaggtttacaag  
aattacatacccttaagaagtataacaattaaccatcgatttcaagcgggcttaaggaattatagaattttctagaacagatccccttcttct  
taaattttgtaaacactatcttatgcaacggctgactctgaagtagcttctgctaagtggtctaaataaattattgatatcgcaatagtgaggag  
ctgggaaaggtccgataagcccgtctcttaaaacatctagttaaagtagttaatgtagaggtcctataaaaattgagcaaaccttgaagcatcgc  
agtaaaattccaacgtgctgggaatcagaacttcgacgtttctaaagtgttggcatcttccgagtttgcgctcaaatgatagcctgttaagta  
attcattagagtacatattatggaatcccttacgaacccttatgaaaagttttccaaaccaaactcttgaatccaatgaaccttttctctgtcc  
aactgcagacatgtagatgcataattcttgaagttttagaactgtcagctttagaaaagacagctgtagtgacgtacatcaggcagcactaa  
aaaaatattagttgacaaccaacttttctagcttacttaagcgtagtaaaggatagatcttctcacttctgtctcatttgggtgaaataacta  
gaaatgattttctgtttgtctgaaggtcgtattctgagcctttgactttctagttttctatctttgcaaaggctcaacaatttactacgaa  
gtcataaaactcaatggctcagaatgattgctaggtttaaactagccctgtagctgattcaaacgactccatacttctgacataaatacttgcga  
atgtaaaaatataatattcatagaagcagaagcattcaaatggatttttactcgcagatgtccaataaataattggctaccttgatagat  
gtagcaggttggcgttccatattcaaatccttacttggcgcactcttctgtgaaagtgaaccagtttttcttacttaactattttaaagta  
cgtactggaaaaactcgtaaaaacgaaaagttgaggagcctattgcaaatgctcaaaaaaacgaaacagcaatggttagataaattctcac

tgcgaaacctaaaatacaaccgaaagctcctgtttctaacccaatatcatttctgatggaaataaaataaaattgataaaaagaatgggctg  
aagaactgacagacgaccagaggaagctgctacagatgtaatactacattatcagtaatgaaaggcgatgacaagcaagtataatgatgct  
aacttctcattttatagactagaaatgatacctatggaagattcttggttgaagctctaaaggatgaattttacagccatacttttaaacctga  
agcagtttctcaagtgatggcagggagagaggatttccccctaaagaagatataatcttggctgcatcactcctctgtccaaagttcg  
cgtcattatattgggacaagatccctatcataatgttgggcaagctcatggacttgcctttccgctcgaccagggttccctgtccacctagttta  
tgaacatatataaagctataaaagttgactacgaagatttctgcataccgaaatcggggatgtatctcgttttagtttcagtggtttttgtta  
ctgaagcaatgttattaactaattgacattagatatttaatacctgggctgatcaggagtttaatgctaaatgctagcttgactgtcgtctca  
tcaagctgcatcccattcaggaaggatgggagcgattacatctgcggtcttcaaattgcattaaataagcacaacgtggaattgtagtgct  
tgcttggggaacgctgctataaacgttcaagggtctctttacagctgcattgtgactgaagagtgttcatccgagccctttgctccgctcatc  
gcggtttttgtagtcatcatttaagaaaacaaatgagtggttagctgaacgttatggagctgaaaattctattaactggcatgctgtttctct  
cctacgcttcaaaatctgcaagatgaacaagccttaggtaacaggttgaaggttcttactcatggcagaaaaataaagcaggaggaac  
aaaaggcatgaaaaatcgagcatggatttctgttattatataactaaacgtagatttctgttcattttgattcattatctttccaagtgtt  
cactctttatttgcattgagaatctatggtttgattttgatccctattggtatggcgcttcataggaataagaaaaaatttcgattttc  
cattgaagttcgaatagcggattgaatatttttagctttgcatgcttcttcatgatagccagttcacgccttaataacttcagttt  
ctgtctgttggcgaccatttctgttctcagtaaacaggaaactgaaagcttccatttcttttggctttatccaactgacttcaagctcc  
tctcgcttgaacttcatgggataattgttcttctgactcagtgccatggaattgctttattgtcggattttttgttttctggatcagtttt  
cgttaacattctttattagacattgaggtaaacagcctgttatttctgtctgtagtccatctgtcattttatgctttctcagcttttcttctt  
ttttctaactacgagatccactcatataattgctatttgggtcattacaataacttatgttgccttcatctcagcaatattgttgtttgatt  
gtaaacataaacaacgaaccctgttagtacatactaccaatttctcttttcaatgcttccattcattggaatataaagatcatttata  
gttaagaaaaagaaaaagaaaaagaagaattattaattgaataccaacctagccaatttccggcctgttagtaacaatttaagtaaaattat  
aaacatttgataaacctttctgagaatcattgcttctgttaataatctcccttttccatttccagctatttactaaataatgctgttaacttg  
gagaacaatctaataattagtagcatttcttattcataatccaacttattactacctaacgaaagaaagaattcaaaaagcatttgaacctt  
cagattgcattcaatacaatgatttctgttcatcactgtctacttcttattactactgtagagaaacgtttcgttatggttatttaacgcggtc  
aacattactccgttctgatgccgacccttctgaatattttcgcctttagtcaagagactaaaaaattaccaaaccttttgttagtctt  
tgttccagtcgaatttattgctaatactcctcaaatttataagagataatggctggaataagagaaggaggagaccgttctgaatggcaccg  
ataagccaaagaacgataacttctcaacaaaatggaactacatcgctcttctgctatggaatcctctggagatttccctcgtggaggaggctc  
cacgttgacaccttgaatataaagggtgtaacagaagccaaacgagaggccttatgggtactgatggagctgaagttaccaagacttca  
accaaaccaacaaaaagaaaaagaaggtggctgtaaggcactccttcaacgaagaagacttgcctcagtgctgcaaagcttgaagt  
ataaaaacattgtaccaggaacattgcttttgggacagatctcaaaataaccttagatagctgtatccttacctaaataaccttaccggata  
tgtacctattaccaacatcttgataagcttctcaccgttgaaaattggatgatgctgcagctggtaccgagaacgaagtcttgcagatc  
gacgaatttaataacttcccatttaattgatctttatcatgttggacaatgggtcgtgcatgctaacgaaagtggatggaagagtcaaaaa  
acaataaaaagcatattgagttgagtagcgcctcaagatgcaaattggtccacagaagatgctaacaacttaccgctgggtccgtgattcaa  
gctgcagtttagcagctggaagaccaggtattgtttcagatgtgggactgaagaacttaccggctttttgcaaaaaataaggtaggagaattt  
acgtttgcagaaggtcaaagcttattgaccgttctatcaaaagatcaacgtattttcacctatcccttccacgcccagcttccggtcctctaga  
tgttttgccttctgttaagctatttcccggtaactatattaatgtgctaactatgctcaagataatgggtcgtcggaaagtatatgggtg  
cgttgatgtaaccagtgactgtaccattgttctgctaactcagacaaaagatttggaaaaacaattcaaaactgccaatcttccgggctcgcgta  
ctttcgtcatccctggatcctcaaagattgcaatttcttcttacctatgttctgaacttaattttgattcagcaaaacccaaaagcttgacc  
agcttgatgttggattatcattgacagtgctaaagtaacatacgttagtcttcttggcggtttttgtgatgtaggcttccctggatctacggttt  
accatattctctgttgcggataaaaaggtagcaaacgttaactcaataatggtccgtataagctaatagtgtacaccgtgccgtgtaattg  
gctatagctacgttgacaactgttcatcttgccttccagaattccgttttagaacaacccttttacgtattgaagatatacaagttggtcaacatg  
tggagggtactgtgcaagctaattccacaaggtatcgtcgtctcgttgcagatggaatcaatgattggtgccatctctatgtcagacat  
tgcttgcagttcccagcagcttttaaggttggagctactgtcaagggtcgcgtgttgacgacgaatgttctgagaagaagagtatcgtcaca  
ttaaagaagctccctttaaacagtgaattgcctccaattgcaactatgaagaagcaacaccaggtactcgtgctataggtgttcttcccgtgctt  
agaagatgggtcgggtgtagagtttacaacagcgttcaggtttctgctgtgctgagatgagtgaaagcttatatacgggatgaggggaaaca  
tttaagattggtcaaactgtttcttactattcttagctgtgaacctgtaacgtaaaatgagagtcaagctgctgagcaaaatgggacgaa  
aaaagactgaaacaatttaataatattccttgggctctgttcttccgggtcgttttacagaaaactgaaaattctgtattgtcgattgggtaac  
aaagtctcaggcgtcatcgcttaggtcatttgcagatggcgatcttccaagtgtactaaggttttgaataaactcgtgtttctactaaactaac  
agatgtgttgggtcttcaaaaggccaagacaaaaaaaataaagcctgtcattaaagaggagcttataagaagctgtaaggaagaacgctt



ccaaggctatagaggaaataaaagagggtatcaaataatgctggttctgcccgaatacaaccgatttcgggttttctgagttttgtgatggct  
tagtagcgttggtaccctaaagcttattgtcagaagactatgtacctgtaccaggagcatttttaaatctctgcagctctgtgaatgtttgtctct  
ctgtgaatcttcagcagaagaaaatttcatgtcttcaagcctttatcttctaataaacaagggttaactgaagtttggatagcaaatatgacatt  
gaaaaacgttagatgagctattaagaagactataattatcgaccggaaagatcatatggggattataaactcagcaaaagcttctcagctt  
aacgttgaattggccgctaattacaaggtcgtgttgaagtttctgaggtattgaccgacttgaggatattgagaatctcaataagcctcttaaaa  
acttcaagaaaggtgataaaatccgtgtccgtgttttaggtatccacgattcaaaacatcataagttttacctatctcacatcgtgttctccaaa  
caattttggagttgagtatgctccttctgtcatgagatggagcccttcaaatagaaactccctcgttcaagaaaggagattctgttgttcttat  
gttaacaatacgtctcaggaggtgtgtgtgggttctattacgacgacaattaacggaaggatcatggctatggacttgataatgatcggaagtt  
atcaatgctatacctaaatacttttgggggtaaagcttgaaggtacagtaattgatacctcaaaaattctcagctttccctcataaaacctgtt  
gacggttatgaatccgtcaatgtaggggataaattcgtgggaagagtacaaaatgaaatgacagcggagcgttctcacttctgtgctatta  
tctggaagagtttctgtttgacatgtcagatgattacgatattgtcaggtgaaaaattgttcgtaataaatacatttcggtatattgtttggac  
gttgatgttccaaataagaaaattgcccttccgctcgtgaatctagagtaaaagccacaaaacagctgaggtaaaagatcgagaagtggaatccat  
tgaagatctgaagcctggatctgtcgtggattgtttccaagcttgagatcaaggtctttcgttcattaagtgcgaatttgggtccagagat  
aaagattcgagaactcttgatactttcattaagaatggaagacacaattccaagttacaagctcgtgagagggaaaaatactcagttgtgatt  
acgataccaagcgtatcgaaatgacacttaaacccagcaaaatagatgaatcttctcgtattcagactgcgttttctgatatacaggttgaagta  
acgttgatggtactgttctaagttgaagattatggtgttcttattcaaatcgatagcactgatggcatttttaggttgtgcataaactgaaatcg  
cagacgctgttcaatgatataagcagattatacagcgtaggtgataaagttcgcgccacgtttggatgtaatcctgagaacgacgtatct  
cgttaggtttaaaaatcgtcactttgatgcagattcagatgttgaattatcagatgaaatcgaaatgagtcgccgatgaaagctctgaagacg  
aaatggaagaagatcagcagtcggaggcagaatccgacaaaagttcatcgtcgaagatgaaatgataatgacgaaactgctcattgaaacg  
ttaatggttttagttgggacgataactctaccgtcttcgataaacctgccatgaaatctgaaagcgaagtgaaatgataaactcctaaac  
gtaagaagctcaaaatctgaccattcaatgatgaggagcgcaacttagatgaagctccacgcttaccgtggacttgagcgtcaattgctatcat  
caccaactcatccttttatggatcagttatattggcttaccattgaaccttaatgagattgagaaagctcgtgagattggccaacgggcttgac  
acaattaattacaggggaagaagaggaaaagttgaacgtttggatggcattgcttaatttggaaatgcctacggaacgacagattctctcaaa  
agacttcaaggatgcttgcacactgtgaacctctggttatatgaaaagttgtgtgtcttgatcaagagtaacaagatggatctggctaa  
tgaatatatggaaggtatgctgaagaacttaagcaagctccaggcgtttggattcagatgcttcttctttgacaaacggaacgaagataa  
ggcaagaggcttgcagcgttagcttgcagagcttacctaaatctgaacatgttaaaataattgagaagttgctatcctgaaatcaaaacagg  
tgacctgaacgtggtcgcaccgtgttgaaggattgttgagcaattatccgaaacgtctcattatggaatgtcttaattgatatggaatcaag  
caaggcgatactgctatcgtcgtctctttgagcgtgtttagcatccaagcttctcaaaagaaagctaaatttttaagaaatggttgac  
ttatgaaaaggaaattggcgacaacaagggttgaagcagttgaacaaaaggcattggaatattgtctggaatcgggaggattaatctctc  
aatccaaatataatcttttgggatacaacgttagcatgatgattgcctctctttgacagttcaaaagaaatataatgatacaggacagtg  
atacagctaatggcttttatatggttgggttttggatttaattcctctaaatggatgataagattgggaagacttatggttagaagtatatctt  
atagtatttcattgaaaaaagggtatttatcggatttaataaaagtgtttgaataaaaagttatagtagttgcacagtaaaaagtgaatatgaa  
gggggaaatttgaagtttgcataaatgactgttctattgatagctaaacgcagacggatacttatgaaacatttgatttgaatcaagtgaa  
attgattgcatgtaagaaaattatactagaaagtgaacaccaacccacatgccttttttagtagagtctgaaaggcttaccatggttagactt  
gacgaccaaggagccaatgttttgcagcccttctaagcaaaagagaccaagaagttgacggcaagcatgatgttgatataaattggtcttgag  
acatctcaacgtgaccaacggcaacaccaaggcaaaaggaccttcttaattggaacttgatggttagacttaactcaacaatcttaccgtaaaga  
tcatcgttggagagacaggggtggggaacttaccagccttagaaagaccgggacctaacaacgaggaattgcttgataaggacttcagaag  
caacgaaggcatgacttcttagccaacttctaacaagcttctgttttggtaagcttctcaaatcgtcgaccgacatagcatcaacaccgcca  
tgcttagcacggtccaaatcgtgggcatccaagaatgcagagagccatgttagggcgaggacattgggcaacttgatggtaccagagaaac  
gcttatcacgttgagggtcgtagttcttcaaacgatttgaagctcagcgtctcagtgaaatggcgtctcttctgagatccctttaggatttgc  
cgacattagagcgaaccgtggcaacgtgaccttgacatggttcaatgctggttagtgcgggtacgtgaataaacgaattgaaatctaccgtt  
tcttgtgattcaaaaaacagtcacatgttttagtggtaccaccagtaggttagggtgaatgggaaaagagaagcaacgtatgaaatgcaaac  
catttactgtgctatgcatacttgcggtatataagaataaaagcgttgaacgatgcacggcaaccaagggaaagaaaatggttagcagaagcag  
atgaaatgagaaaaggaaagtaaatatttaataatattgaaggaatggtatcaattggggagctcgaatcgaaatgaaacgagaag  
gtccgcagcgaacagacgatgtaagtttccatgaaaagtaactatgcaattggagacggcagtagcttagcaagaataagatcgcatag  
aaagatgataggggcctgtaaagatgagttccactgacgatatacatccttaggattggttggatattgttatctacaatgaagaagttaacag  
aaatactagccaaggcggcaactaaggcgtaccattaggaggaaaagtagagtaagcaggaggatgggttagcggagttaggccgaagttt  
gatgagatgtgggtgaaggaggaggaatggaggcgtattgaccgctcagtgatcataaacaggatagggaggatactcaagacaatgtaga

tagcgtggattatgccgggtaactctaaggcacaagacaaatgtaatgagaaaactagaagcgttgtagtacagtacggcaatatgaaca  
cagggatggcataacagacaactgccaaagatgggataatccaagacatgaaggacatactctgactacaaaatccctacgaataccga  
cgacaataaagggaacaaaaatagaaagaacaattaacaaaaactagtcaaggtgtgaggcgacatgatggatccttataagagtata  
aaacaatctaaggaatacagggacgattatttagtcttttcagaataaaatgcaattggatcaacaagcgttcttagggatgggggt  
aggaaagtgagacttctcagaaggacaggcttaagtacactgagaaaggcatgacgatcgggtaacagtaacaatgagcaattagtaca  
gagggtcatggaaatcttctggatctagctattactaaagaagaagctttttgtattcgtttacgttgggggtcctaaggccaagtgtcgacc  
ccagctaccgttgttcacactgtggctattcactataaaaggtaattgaaatggcctttaatggttcagacaaatcagctccaagtcaatatttct  
tatttagaacactaataatgtaatcatgaaacagtgattgtgaagccacgcccagagacatcctaattagcaacccaaaagcaacgaacc  
ggacctgtttcttttgggaaccagagtgaacaaatagctgtaagctcatgatccgtaagaaagagacaaaatgatttattcaatcacta  
ttctatacagagttacaggggttgaacaaccacagttatcgacaatggaacatcaaaatcgggtggatctcaatacagataacatacatttaa  
accgcttagtattatgtttattgaattcagcgtcaaatccatcatacaacaagctggctgtttacgtttttacccccctaacaattcccc  
tgaatcggaaattatctattgaaacgaggtcgcctaaataaggatagacatcattaatcttaagtaaagttaaatttaccacaccttggccac  
ttagctaaaaccagttagtttagaaaaagggtatagtagactttggaaggcagtaacacgcttcaaataccataaattctttgtttattgtta  
gagacttatacttcttctgtttgtatattctctgatactggaatggggacgtaagtaattgttcgggtctttaccacttttaggttttttttag  
aatctatatccatacttttagcatatagagcaggatcctttttccctttgcgttaggtgttgcgttccacttactccttttgaacactataaa  
atctccttaataaagtaagggtggaatcattatctttgtttcattgtttctcatccaactccttccgtctgctttgtgcttggtttaaaactttgtt  
ttcttctgttttttaggtggttttctttggttttaattcctttaatatattgtgtctctaagactctcatatcttgatcccttctctatagacgt  
tactcagcttctggtttaatttttcttacttttctttttctgtgaagtataaccaatcaacttatttatacgaaaactcccttattcttggttgtt  
atttcttctgcaattcgttcccttggttactatagaaaatgagtactccttgaataatcaaggggctgcgaaaaatggatgagccgcatcact  
ctgatgaactctcacttctgaatataccaatcaggatcccaatcccaatatttgcgggagcagcaaaactattgaagaagacgttctctactc  
agcatgagctagaaagtgagctcgagagactgacccccgatgaaagccaagctcactcctgctcgcaatagtcgccccgatctacagcgta  
ttcgaccgcttctacggcctctcacatgagattgaagacgaaaatcaattttgaacgcagagatgtctgttctcaatcttctgctgctgta  
gcacaggtagaagcattcgtagtctaccgtcgttctaaaagaaggttagtcgaaaaatcaagtaaatcgaagaagcaactgacaatgaaca  
ggaaaagtctcctgttgacgacgaacatcgtcagttggataacttggcttctgtcaggttcagcacagaggctcccattagctcctgaacatcct  
attactatttgcggccgagttcaaggttgcacaaacaaagcttcttattcgttccatgattatatacttctatcggagcttattgtgattcc  
catcttgttggctggttctatccatgatacagggcaagagtacggcaatcagactcgttggcttcatattgggtggttcagctgatgggatgg  
gcatttgggtgggaaatcatatggcttactttgtgggcaggtcgtttgctgcaaaagttaacttcttcttattttgcattttcgtgtctttgttagtaac  
aacgttaccaagtggaatgatggcagtagctttggagtttctttgacgctgttctttggatgatggcttgttatgaagttttctccaatcatg  
actcgacacatgtcggagacggcggtgtgtggatgcgaaaagacatcaaaggaaagcgaactcagttagattgggaaaagagtgcgaat  
aatgtacttatttctttttattgtctcattatgaatctgatagaaaaggcttgatgcaactgattgcaatgtctttacacagacgtcagtagaa  
tctagaattctgtttaacaattcgtataaatgagttggctcggctttagaatatgctagaactcggctctttagttcaatgatgccattcatcgt  
gctaagaagactgggtgttcaactttgcagaaaaggatcgcgggtgggaagacgggtgaatactcggctcgagttgcacaaaatgcttgaatca  
gacaacctatagggcaatgggtgcttcaatttgtcaccgatataaataagggtgctgggtgaaattgctaactcgtgaaattcaaggttctact  
tccccagaaatgttctcagcatttctgtagaacactcgggggttccaatcgctagctcgttgtttgttccaagctcgtgtaaactggaaacg  
ttgatattgtattgatatttcttccgtttatacaaatgaaatcgggtgaagtagaagaagaaaataaatgcatgttacaacatctttgatcgt  
gatttgaatggtagacattacctgcgaggagattgaaactagcaattgtggagattggaaaagaacgtaagatcattcagcttcttctgtagta  
aatgtatccattggcaaattggacgcaattgtatgttctttgtgctttgattactttgtttatttctatacttgattgctcgcaacttagcgggtg  
cttgacttctgctggtaacctggttattgggtcttcttggctttttccagttctgcggttgaattgcttaattctattttttgtttcgtaagcatcct  
acgatgtcggtagccgatcagtgcttgaatgggtggttacgctctatagtaaggaggtcgccattatgtcttcagaattcgtttgcta  
acaggtgaaatcattcaagcacaacaacttataaacctttatggatcacgaacatgcgccgtagtgatggaattccgatccaattactgtc  
agtttgaattcggtagcttcttgaacagattgaggcctcgtgtcaaatattgacttcttgaagaggaaaagcgagactataagccgat  
ttgcttactgaggtactgatttccccattatattctatgtcattgcttgttttcttccacaaataactttcaagatgaaattctgagaatga  
gacgccgtaacatgttcatgtgtctttagacttacctcaagagttggatattgtgtctctattaacaactcctcgtgtaagacaaaggaatca  
cctatgttcatcaacgttgggtggtgtaacgttggcggttagtaccacccattcggatcgaatcattcgataaaaagtttgacaaaaggccaagt  
gatggcccacaagggattttgagaaatccctcaataggccaacctttcaagaaggatcatggagctccactaacgtagctgatgtgaaagac  
aaccaagtaagaagcgttatttctcattaggaactggtcacatagtgagtgctatggatgaggttctgatattggaaggacagataataat  
cgtgaacgtctaccgatgttctcattgaaagtccggtactgaagctatgcgccgtgaagctgaattacgtagggacaagaagatgaagagg  
aagaagaggaagaggaagagaatgatgaatcgaaaaatcttccgtagatctggtcgtttagtctatcgtctcatggaaccgaaactcgg

ccaggctagtgcacatacttcacctgctctacgcaacattgctgttgatgatagaggacttctctgatagatcgaagcagcactagatccgctcat  
atntaaagattgtatgttgatctgtctgactgagcctttttattatttttttctaattgctgttgagaaattgagcttttttttttttcta  
atntaggtatacatttttgaatttctgatttacttctaatacatttaacggaagaatgtttataataaaattgaaagccatttactattctgta  
aatgaatttctgttgctcttaaccagaagtgaacgtgaacgttgaatgtctgctgaaattgaaaacataacgaaactaagttattgtgaaatg  
aatcggtagtccaattgatggttgaatttgaattaagaatataaaagatggattggattgtgataaagatgatagccttgatgatgagct  
taaagtattatgaatgagtacatgtcactcttcgattttcataatgaaccattccggttttgccttttaataaagtagctgtacaattgaatgca  
aagagttataatcgacatacaccaacaactgttctgcccataaataactgataactgacgttatcacaacataactctttattgttgattgaatgt  
gtagattagatagtgtaggacttacttagtcagcggacatgcatggtggaaaagaaggcaactcactataaaatgctgctcgtttcc  
acaaactaatacagtagcattgaaattcataaagtagagcagccgtaataaattgcaaaaaggtaacaatgggtgaaaaatgaagtata  
cgggtttgaagtttctggacatgttcatagagtcgacttttctctcgtttttgaagattccattgaaatgatcattacacaatgacagacatga  
attcagaggaaataaagcaactaaatccatggaaacaggttcttattcgaagatggagatagcttatctcggatagcaatgccattatggtgt  
atctagcaaaaagatggaaacgaagacttttgggtgctaaagatccattggcatcttctgggtccaagatggttttctattctgaggaga  
gctacgttatggaccatcagctgctgaaggattcagctttataaacgaacgaagattccgaggctcctaacagattgacgcaaatatntaa  
atntatgaatgattatntagaaggaaaggaatacttagttaatgatcattacgcttgacactggccatgtattcctacacatcgacgctcca  
gaaggccacatttctgtgacccatcccattatgtgtctggttgaacgcattgagagctccttgagtagtctcctcctcaaatggctcctacc  
atctatgaaagactattaattacgatgactacgttattgcatgaatgaaaaagtagagatgcttctgtaattatgggaacgaaaagcttcata  
tcatagggagttacgtatatacaaggtattacacacgtttccatcaaaagattatntagaagagcattatatacgtaaatcaattatccaaatct  
caatcaactttatgctttataatcaatgtcgaatttcagcgagacacacaaccggcccagccatagccaatgagatttctcagcgtgacggg  
gtctcgtttattgatagattactattgttctgtaagaagtttcttcttctcctttggagactctgctcctggaatgacattcaactttactgctct  
tggtgtcgtctgaaagaacgtagatagcttggagaacctgtgaataccgacaaatcaatcatcaagaaaatagtgccaaactg  
aaattcmetaaagctaaagacactgtagaagacagcttctcaattgtaaaaggtagccaatgccttcacagaaacccagctgacaaaatac  
aaagcccaataacaaaaagtaaatgatggagcataaaaatccaactttgcttgcgttttagaggtgaaatcatgtttataggtcaataa  
gatgcaacatggcacaggcataacctaccaacgaaaagcgtagaatccccatcggtagaatagagacagtcagctgacgtaacaagcat  
gcaagcatagccaaatgtgaaacacagttacaacagttcgataaacgaaacgccaagtaaaagatgtagaaatcaccaaagggaa  
attaatcatcactgtatgtagcgaacagtagcactcgaactccagaaaccaagtgaaatgtagtaaaatgaccaacgtgtaaccagttc  
accagcatgctaaaataaacgatcgagaaacctgatgttatagagtagacgtagtaaaagaatcttttggcggactggaaaagatggat  
atgataggatagacgatagcacaacaagaataggaagggcagcccagtaatagctgttgcggattggatcaaggttagatcaaaact  
tttctccacacatccgaaggtatnttccaacattgctattcattttctctgctcacttccgttgccttagcttgaattccaacactcaattatga  
gaccgaaaaacagttcaaaaacaatagttaaatatacagaacaaaagatacgtatacaccgaaaaataaagtagctgttaaaaagaaa  
gattcatgatggagtaaacatgcatctcttataatataaacaacaacaatattgacgcaaacagtttttaacggtattcgtcagcaaacctc  
aaaagagaacctgtattgtacatgaattgaacaagcttccatctcgggtacttagtaaacatgaatgttaaaagacttttctgtaagcacaca  
taaacttcaattttgagtaggcttcagataagaaaatctgtaatagctgttaacctcaatgacggaactcgagaattgtcatacgat  
tatagctttaagaactatacattaaagaagatcgctaatacaattaggacattagcaaaatacaagattaaaagaagtgaaataacgtag  
attgttcagcaagtatacttaagatagctgtaacatcaaaaagatccaacgacatataattaagatattacataattatctgaaaggcattca  
agttgatgaatagaatcgaatcatgaaggtactttcataaggatcctaagtaaacatgaggggtatctatgctttataaataaagggcaatgtg  
gtaaagtgactagctgataatgaagtgaatcagataaccaatccaacaaaagttgaaaacataaccaataaataaatttttagcaggtg  
tgctgaaacgttcagcacgttcttggcttttcggctcaacaggatcttcaaaatcgagccttgcgttttctcggcctgctgatttgggtctg  
ctggcgaaacttttcttcccgttatcaaacgtcctttatgagaacgatcctgttctcattcttttctcagcgagaggagcgtttgtacacc  
aaaccgattagctcgagcagctttttttatcatcatcaattggtaaacaaaacgtttagcgcgttctacgagcttagctgctcagtaata  
atatttccgaatcttgtgaatcttctgttctcgttctcagtggtattttctggctttcactcgggtcagaagttgctggttctaccttt  
gttctcctcattcattccaccttcgaggtctcctcgggtctgggagcctcctctgatggcttgaagactcttctacggcagcgtcattgtccat  
atctcccagtcattgcatcttcgggaggagctaaatcacctaaatctgtggcagcgtttttagtaaaccttatttggcttcaattttccctc  
ttccgagctagtcattgacaccaactcattctgtttccattagtgaaaggcctttctcggataacttttgcgtaaatcagctaccttaagtt  
tttaggtcagacatatttctatgttctgtttatcgacgattttttttattacaatagcgtcgaagtttaggtggaacgtagatgagcctgga  
atgtggtcagcgtttggatagcagagatttacgaagctcctaaatataaagtggtatcagagcactaaagtggcattaaataaacat  
aatcactaataaaaaataaaatcagtcagtgtaggaggaaagttgatctcaccgtgacatacacatggacaacgaaggttaagcttacacaaa  
aaaaattgtttacgatcttaattaatgccttgtaaacgtctcattgtagatgaaccatatacactatcaacattggagtagatccacgcat  
agtcactgtttattactcaaatcacctacctatctcatctgtctatcgataatctttataaacattgtgtgttgcaacaaaacaaggcatc

caattcaaggaaaaactcctactttttataaataccctggttctattaaacaaaaaccatacttttttagtcctaacaagaacatttttact  
cttgagggatctcaatgtcaccactgtcgatctccttttgaacatcgtagggttcttaccttcaacgggtgcaaccaacggagaaagcagtaccaa  
ggatctccttaacagtaccagaaaggtccttagcgaggactgaagcgcatggtacgagcgacttcaatgatctcgtcaatagaaacgttacca  
gagtggaacaacacctgtccttcttctgtcacgagcaggttcttcaaaccttgataaccaaagcagaagcgaaggaacgacggagacgg  
cggcttgacggttttggatggtcaattgacggtaacacgaagaccttccagtccttagtagccttggcgatcttcaccaaccttcttaggaga  
caaaccaagggaacatcttaggagcaagagtagaacaccggcaacttaccaccgagcgtctcatgataacggcttctcacttattgggggt  
cgaactaagcaacatgttaaaaaacttgattctactattgcaatttcataacaattcgtgataaaaaacttcttaggagcatcttctcttagtta  
aggagtaggtagaggtggaatttcgtgttcgtgttatgtactgttagtatcctcgtgactattctctggcgtgttacctggctgataactaaca  
agtaacagtttattaaagtaacaaacaagaggaaaagcatgaaatgaaaaataaatgaaaaattgtaataaactgagataaaataaaggg  
agtaagtatttttgaacaattacaagactattaatttgaaaaaaagggaaactggattaagaattgatctgtgtagatggtagaatcctt  
cagttatattaattcctgtcgatttttagtctacatctttttatcaagcaattgtagtttgcagatataatcattcatgacttttggcttcttaac  
agctttaaactatatagaactgacgactgattattcacaacttatttctaagaacttctattgttagtaaatgcttttgaccacaagaatttca  
agattacaaaattgatggaatttgattaatcatatataatgtttttgtgagcctaataaatgaaaccaataaattatataatcctgaaag  
ttgaaggaatgtccataaaacagcgtactttacaattatcagttatattgaaactggtagcatactatgatattcttctattgtaatatcta  
aatgactgagtcattcttcaacagtccttttaagattaactcaacctgcttcagaaatataaaattgacgggctataaagttgaaacatcag  
acaggcgaattgaaatcgataagctttgaagacctagctatcgagttcacaatagcctttgtgtcataacggtagtgatcatcctatgtagat  
ataactgcatgcatggacaaggatagatcagtgaaattcaccacttcttctaccagttccactatgaatattgaagattataatcctttcg  
aattacaagagggattatgaccaattatcaggccaaatgagaattacggaatgcatgtagctcagatagatacaccagcgttacttgggc  
tattattagtaggtgattgacatgtaggtgaccaggcaaaactgttgaattatcaaatcaaggggaaaaacaacatgtagcgtttggcctact  
gaagcaagcattaacaaaggtatcatatccgaattggaggatgctgctaaacgtaacttggaaatcacatgggtagctctatattagactataat  
atagaaaaatggcctgatgaagaaacaagtcaaacggcgcccttaccgctatttctgatgatgttctctaactgcaactgctggctggat  
tataccacaaagtggggtaataagaagtggaaacttatacaagaatgaagcatataaagacagtgcccgtgacttagaattgtggcgttccg  
taatgattttgacagaactcaattgaaagatggagagatgtaattccacatgctaaaaatgtaagtgatcactagtcattcctcatcgtcaatata  
gcatctcaatctttcagcgtccatttattgctgggaggtgcatatccaggatcctgtttttataattttcgctataatcacggtaataactataaa  
gaattactatctattctatataaaaaaaggcggaaatcagcattactcaactcaaatagaaactatgagacaaagaaataactatgacaa  
agaatagatcaagttactacattgaaataatataatgtagcatttagtctagtcgaaatcttgagattgaaagagtcattggctggctgaataag  
attgttttccattatcgattgttttaccaaattcttagacggatttagtatccttcaggtaatatcacatcgttcatttcaatgtacaatcctacaa  
gtgtgtgtaattaccacatcgtgtgaggtttctgtcgtgacaaaaattagtgccaataaagatacagtaacttaacataactttctatacttatt  
tagcacaacctaagctaaaatcttggttcatatccatggacgatgattaagatagccattttctaatacagagctctagttgcttaaccaaag  
cagtaatattaagagatcaattttgatcttcatgcaattgatttcaaacctttttatgagaaatgattctcagtcctggacaggtagatacat  
tctagtcattctgcaactgttttcatgcatgaccaagataaaaaacgtaaccaagaaaaagttactcagataatcttttatttcttattctaca  
aatcctatttccagaccgtaaagacatcatataggatcattgatataatagttcctaaaagctttaaacaattatagacccttattcacaagtaaa  
aattcaaacccagtagtatacaaccaaaggaaatactttttataattaccacaaagtaaaatggcatttccctaaatacgtataaaaaaa  
aaaatcctcacgttgttagacatctttataaaggatcaactcctgtatagtttcttagtttttctgattttttaaagccactcatgacagatttcg  
gttctttcgggataagggatggttgcgagcagcgtttcagctggtttaaagatctaaacgtgttagtcagcatagttccttaataaactttcatca  
tgtaatacctgaaaactgcaaagtaaatcttattgacactcatcatagcgccaacgttgcgaaactctccacaatagttgggagcgtgaaaatt  
gtcacaagtaaccgttttagcaaaaaattcataaccttcaactcttgatgcgctctacaattaggtccatgtcgtgttttgaaaaaccgatt  
tacgacatcagcacaatgtatataaactcctctgtcattatctcccaacctgtgacatcttttcaggatccgaccataatagatcgacaat  
aagcctgtatcgggaatcggtaggacgaataatcgttgaattgtcctatagcatttaaatctggggaagggccaccatgcatacaaaagat  
ttttcatcaacaattgcagcaacgggcatgagttgaagcaatcggtaaaaatcttcatatttaattgttagcagcgttgcattcgtcataga  
agccataaatccgattgatactagcacattcatggttgcacgggagaaggaagaagttttcgggatacttaattctgaaagcaataaaaggca  
aataactcgagacttgccttctcgtatcaacgtagtcacctaagaacaaataattgtatcgggaggaatccaccgtactcaaatagtcggag  
caagtctgaatattgacctggatcaccacaaacctataaaaattgttagaaagcttagtccatcttcttcatccctagaggctctcagataa  
gaatgaatgggcatgagtaaggattgagggttatcatgcatagagaccaagataagttgaccaaattcaagtcggcgaccaaggtcaaatc  
aatcgtaatcttcaacattacgatcgaatgtgaacaacacacagcagttctttagtattatctttaaataagaacaccattcattcttaaaa  
aatggctatcgaataacagtcacaaacccgaagagagccaaggaaaaaagatgtatcgaatattatacctttaaaggagcctccaattcc  
aacagcattggctgattaagaataaagagcgggaagtcgtacataaataacgaatttctgctccgtcaattgagttggcggcctggttcaca  
tgctggacttagtttttttctgtagacaacaaacctcgagattgaaaagtcgtagctacataccttttataagcttttctataatagatcaat

atcataatccatattttgttctaaattcaaccgcaattcccaagaataaaaaatccaccaaatgcggtgttggcttgtgtgagtatatccaat  
attaagaagccaagaagtcataggtcgaattttccctctttcttttaagcgtaaattccattgaaggaaaaagaatctttcagtcgtctaat  
tccccgaaaaggtgcgattcattttttacagattcacgttgaactactcgaaaaatcaattttctcatcggcagacaacctaaagaaatgcga  
agtagctttgtttgattttagggttaggattgaaattgacgtttagaactcagagaataacttttgaatttccaaaagcatatatacgtgat  
caggaatataagaagtaaatttctaataatttaagactcggaaatattctacgtttgcatcagatgataaacaatggattaaatacag  
acacccttcgttttctctttccaactatgcttgttacaccgtatgcttactaagcatttgcacacgaaaataagtctttcaaatgaaaaagatga  
actctcaaccataattgattttttgaagatgggtggaactcgtcaagattaattgattctgatatgcaaagggtatcccaatcttatattgatatt  
ttaagcaagaactattgaaaatgatctttgtttcagttctaggtaaattctttcggactaagctttctacagctgctgtttcgtgccctttacca  
accgtacgtaccatgcacatctgatcgaaaggagctttgcttacaagcaagggaattttgttaacgaataagaacctaaatatccaatttc  
tatactcttaattcgcaggactaaaactcaattctttaccactcgtcagcaagaaagaacttattctacattacaactccattgagaccg  
gtttgggaatttttagtagcttggtaccttcatttagattgtgaaagcaacaaatcgataaacatgcttcatacgaacctgcttccaaagccgtgt  
acatatggtatctcttgatgactagtctatctatggtaaatgtagcttgtttgcaactcatacaaatgctactagcatctcattatcatgtgccta  
tggagaggttcgagaaaagctcgtagtagtaccacctttgccagcatcttcaatataggcagctactctcgttgccttattcctgtt  
attaagcattttcgcctgggttatcttttacttggcttggagaacagtatatgctgtttgtcaattctgtctttttgaccccgcaaatgc  
ttctcaaatcgtccattcatcgtttactcaattccttactacagggattatcaggagctggcttccattcatgccggttggaaagctatagcca  
tgctcgtatatacgtgaaccattgtccttttattacttctattccgataatttttttttaggtcctttttcgaagttattgtcctttcacatac  
tctcttcagctatacctagtgccctggctgttgcattttgcagcggggttgccttttcttatttctatcattctcctacttattctgcttctcttta  
gaaactcaacctctttgcttctttgaggttgcgaagaagtaaactgcccgggtcatttccctccgaagaccaagttcacaggcaacacctca  
gtcttcacctaatttccagttatacaaaaagtataaagaatattaatgatgtactattaactcctacttttccaattgacccctacctgctgctg  
gttghtaatgctcttcttttacatgccttctcggtttttcaactactacgttcaatattgcttaacgttaccaaatttcccttggaaaagtcac  
atatttagttcattgcaaacattggctcttggtagcttctctatcttgacataattgtctgcttttgatcattgacaatccaaacatttactatat  
cttaattggaggcacacttaccctctcaactaactatggcatattacacggctttaaattctttattcctttcttagcatttccatggaatgtct  
cgttccatggagccaattttcattccctgctgaccattcacgctcctttgagttctttacaggcttattggagaatctgccatcttgaagctttg  
ctactgttttctctacatagtttagcttactttatctacaaggcacagaaaggagacatttactgttttctcggctcctgcttctcactctctt  
ctgttttagttctcttttattcatagatattcatctaatcatgcactctgagcagatgaactgctgaagagtaagactttctcaggttgatgatatt  
tgtattttttttactagttgtttgaggacactatgaaggattctagatacgaatatttattattgtttactaaatattctctattcttttagaaag  
aaaaaagatatttgcctgtagaagagctgtgaaactaacgttttagcagtcagcaagacggctatttccagtcagcaattttctttctcttt  
cggattttcatacatgttccaatgatattttattctagtaacaatattcaaaacaagctactcgtatctttttgttttagtgtgattttccgtgtt  
accatcaaaaaccttccactatttgattattaatccaacacaatcgaataatttaattattaatattgatactaagtattcttattgattattc  
aataaccgtctttaccaacactggaaattgttatccatagcctaaacacttaccactgccacctcaaaaacgggtgtgttcttaaaaacaatga  
atttgaggaaattgaagaacgagatggttctgattattaagaacactttaaattgattattaacatgcttcttagggatccgttttacctggaa  
cgctttccatccactagaatagaagctctaggacaatcgttccaatttctgctctcaagccttgaaccttagacctgatctacctccgtcc  
ttttagaaccttactgtaaagctccatgcaaagcaatttgaatcctttttgtaagagtgctcatataggctcaaaagaattagaacagca  
ggctaacaaaatcatagccacttgacactcgtgtaagtttggatagtaagttcctaattatcaatagggttcaaggcagctccataaac  
agaaaacccaagagaaagaagagatctaaactagatttttaggtcgttttctgcaaaagaacatgctacctccgaatacaaggacgta  
tcaagcaccagcttctctgaggttactccctgaatttctctacgattgagtatactctaccagacccccgcaacttctcccgtattcttttgtg  
tggattatgtcaggatcaggaaaattgcaatctttaaaggattcactcatcattagtttagcctgcttctctgaggtttggttggcttgatta  
cgtttgtagctatggttgatgtttatgagctcggatacactgaatgttccaaatcctatgtattccgtggctcaaggactatagttcaagcaggtt  
caagaaatgttgggattcctgtcagttctgctgctgctgcacatttgccttacaacaagctcgtgctgtttctggaggatgactgcttctgc  
tttcttaccattcagcaatgtgaattcagttgaccagatcctggaacagcttcaacctgattcgtggcctgttgctaatgataagcgcctca  
gcgctgcaccggaactgctttaaactcgtgtagcatgatggaagtagctgtaataacagtggtggtcgtattatggttttccggtggtccc  
agtacggttggacctggcatggtcgtttccactgaactccgtgaacctatccgttctccatgatgttgaacgtgatcaagtaagcatatgaaga  
aggctttacgtttttatgaaaaccttagtaagcagctcagtgctagtggtcatccgtcgaatatttagctggttcttggaccaaattggtatgatg  
gagatgagaagcttgcggctagtagccggaggttatttggttctttctgattcctttacaacatccatctttaaacaagttccaactatctttcc  
cgtgatgcgtttggacacttagcattaggttttaatgccagcatggaggttgcacaagcaaggaattaaagatatccggcttaattggtatgctg  
tctcattgaacaagaaagctcaaaatgtgggtgataccgaaattggaattgtaatacaaatagttggaagatgtgcggtctctctccaagtcta  
cttatgctctttatttgaagttgtacacaaaccgtcgcctcctcaaagtaatgataaaggcttaatccaatttctaccttataccaacattcct  
ctaacactttccgcttgcgtgttactactcagctcgtgctttcgtgatgggtggaagccctttaaattcatttaattcctttgatcaagaaactgctgctg

tgccatggcacgaattgctgccttcaaggccgaggtgatgatggaccggatgttcttcgctggactgatcgcattgtaataaacttgcctcaaaag  
tttccgagtagacaaaagacgaccggtagtttctctctcctcaatttactctttatctcaatttatgtattatcttcgacgtagcccttctc  
tcaattttcaacaactcaccgatgaaactgccttctaccgtcatatgctgaatattgaagatgtaacaatgctttgattatgatccaactact  
tactttcgtttctttgagcatcctgatggtaagcctgtgctatttagatgcagtttctataaagtctgatgcaattctttacttgataccttctccat  
attcttattttccacggtgatacaattgctcagtgagaaatgccggttatcatgagaagccggaatgcaatttaaaagaattactgcaagct  
cctagagttgaggctgccgaattgctgttagacaggttcccaattcccagattatgtttgtgaccaaggtgtagtcaaggacgttcttgcttc  
gcgattaacccatcgaaacccacaactctgctactattatgggtctccttctgctcatgctgttttaaccgatgatgatcattacaagtattat  
gagtcatttaaaaagcttgcgttgctgtttctgaacgtaattgtatgctggtaaatagctttacctctaatgatctcggctgtttatgcatctac  
ttaggtttttctatctaagtaaactgtaataagatttactatgattttttatagcctttttatgtcttagaaaaatcgactatcttttaccta  
agtgcgttcgttcaatggcttaggtaaaactcaatatttaggagctacgatactttgctgttcaataaaaagtagtattaaagggaaaattc  
tttactgaattcattatattcgagtaagagatacgaagagtaaaaggactttgttagattgtttatactcactttccctgcttaacgtttgtttttg  
gctggaactaaactgtttaaattgctaattgtaaaacgaagacattctttggcaaaagccttctatcttttattatccaacatgactgtagtcg  
aagaatattctgaaattaaacaattaaggaaaccaccaaagcgtatactggcttacgaaactaattactaccggcgcaaacctaagac  
attccagatatacaatcgccttctaaattctataagatgcatgtggagtaagtacaatacaagatgtgtttactatagacttcatgggaaact  
gttctgcatctactatagaaattgatccttcttcaaacacgcaaataggagcgttggttaataatactattcaagattatcgaataacact  
accaaaagaattgaaagagaagcagattgtagtctctcctttatcgagaaagcttgaactcggcgaaggaacagcgggtaacgaaaac  
cttgatggacctaactacattctgttgaagtctcaaaggctaatggggattgattcaatgtacttcttctgataaatcgtaaatgtctgtata  
aacgtttgatataagcacgaactagctacttagtggacacacaactataatttctacagacaattaaatattcttactcgtaaaagatagctc  
tttaattgtcttacaatcaacccaaaagagctattcaaaaactcatttctgtcattgctaaatttaggattgttagagggtccttctcctgct  
tcactttaaactcggccagcaagcaaatgtgatcactagggaaagtgtcattcggaaaccgactatgcttgaaggaattacgatctaccctt  
tcaaaaaccagttgcctcaaggtagcattggatatacattatgtaacgatcgtgccaactgaaaccaggcgtaaagttcgtaaacggaagttct  
gagttcgtctatatacggatttcaaatgaaagggtgagatctaccgttgaagataatcacatagctattatcataaaatcctcatgatgcgg  
ctcaaccttgcctgatgatagaaaatctaggacgccactccaggactagaattaaatcacgcaaatataccggaatctttgtataatctga  
ataagttgctttagtcttttaataatctggaggaagttcgagggcacgaacagaagcgagtagcaacctggcgagttcatccattaacat  
ggctactgcataagcttaacgtctctgaattgaggatcccagtgaaatgacagttagcaacgatcaatcgtatgctcagtttcttagattcaac  
agagtaagacgctaacgttcttggtcataacgcgattatacatgttcgaggttaagtttaattttgtctcgaagcgaaggcgttgattgaa  
ctcaataatggactttcatgcatataaaactttgaggttttaagaaggtagcacaacctcaacaactcggcgtcaacctcgttcatagtacgt  
acacgacttttgggaaatgaactcctttgtatccttataactcatctcgggagcaaaaggtatcaaaagtttcaacatcaacttctgaagac  
agataatcagctttatagccagcaagttcttcataatcaaatcctttcgataagaccaggcaagagccaagaaggagtatatccatagagc  
gtggacgtagcataacgttcacaagatattatagctcatggccgtaaaacttaaaattagatttgatccatttaattttggaacgctagaccct  
cggcgtcagaacaaccattaaagactttcattagcatcatattatcagaagtaagctttccattcacgctcaggaggaggaggaacaaca  
ggacaacctcacgaagagctgtaattaaccagtcgttctgtttcataagctgagattatacacatctgtaaaggatttcttcaaaccta  
agattttaagctgatacagtgactcaattcaggaggaataacggtaacatgattatcaataataaacctctcggagttcaacgagtaaccca  
gttcaggtgggattgctttgatgtttccagacgcatcaagattccaagttcgtactttccaatttcagatggaagccgtgctcagctgttat  
gattaatgtacagttctgcaaaaaggaaaactgaaataacagtgctgacgttgcgcaatcaataaccagagatcaagcaagccaatct  
tgtcgcgttgccgatgagtggaaccgttttcttctcagcttctgttagtagctgacatcatactcgtatgtagacagattgtttcaacgttg  
ttactagtagtagtgatactgtgtagagttcattctccagacaaggcatttgaggcattagcagcagctcctccgtaagcagcaccattgttct  
ggcattgtaattcatcgtacccatgccacttgttcgagctaaagcggcggcattatgagcacgttgatgaggagagctgaaagctcttgactgag  
tgcgagtgctatttctgtttccaatgttcagaaattgtccattttctaaagccggcgaattatgtactgacaaaatggctgcatgtttgtgatcagg  
cgtaaagcagccctggatcgtccctgaatagattgtccttgcgtatacctaggattgaacatagaaggatctcgcaatttactgtgctgagatg  
tttaatttttacaacattcactaattaggcaaacgaagtgggtgttgggtgatggcaagagttcaccggtagcaagtctgatagcgataacc  
aaacctcaccaccataaacaagcataaaaagaagaaatttagaatgagatctttatcactttttatataaaaatggttgtttagtattct  
acagatataatggacaaggtgcatcggtatgaatggatttaagtgaaggttaaccgctattctatgtttgaaataagcaacaacatgtat  
acaatagaagattcttataatgataaaggtaaaatatttcatattcataatacaaaacttgatgatattgtacatacacgaagaagtaattaa  
aaggtctgttacgaaaatcttctagctaaccaatgtgaaccaccgaactgacaaccataagttgaggttgacgttgagaaaaagaaaa  
atgtgcgctgtatttcttgcataatggcaaaagaaactaattaactgacgtaacgcagatgcacaatttcttctagtaaaagaaacatggtg  
ataggcgtttgcttattcaaacggaccatttgcagactaaaattttgttaatttttaaatatgaacaacgcttaccttgttgcgaagc  
ggcagtcgactccaaggcatcagactcgggtgttggtataaggggtcactacactaccggccagcgagctagataaccgaatcagaataattggtt

ttaaaacatcccaggctcgcacggtgaatcagctcctccgctaacaagtagtggactcttgagaaaaggaaaggaataaatgcctccttgat  
ggcctttcattgtctttatccttcgaccagatccaatacccacagatgtataagtcacatcgaatctaagaacctgttagtaagcgtctttccaac  
tatttcttttcaaaaataaataacataaccagcactagcagacgatgacatctggagcaatggctacagcagttaccggctttgatgg  
ccataaaaatacgaaccgaatgcctctatgaacatcccataacctgcaagttttgtcattagagccagttaaaacataagccgagtttggatga  
aaagtaacgcaactacatccaatcagttagatcattaatctacaagctgtaacctacatcaacatcacttaagtgccagcaaaaactcgcaa  
ggataaatatggcacagctccacaataacgctgtttgatcatgcaagcggtagcaaaaatgtccaaacggaccaaatgctacatcccatat  
aggaccactatgtcctttataagcaaccagtgagtttctgtccagcggaccaagacgagcactccgatcttcggagcaagcaaaaagatatt  
tattgtccggagagaatttgtaccataaataggtcctgaatggcttaaaagtcgagtagagtcactcgtggctcatttgcctcgggaagcag  
atttttatcaggcttgagtgaccagagccgaatataactttctggaaccggagcaatcatagttgtctgtgagaaattctgcacaattcat  
agcaccatccgtatcatggaaggtgtacatacaaacactgggaagtgatgctcggggcccaaatgcaatctttactccaatctttcactgctca  
acttcggaagttatcggcacctttatgaggaggcaaaggtatagtcacgagaaggagcactcttctgattaggaggatgatttttcgaaac  
tcacctagtagattagatgactttgcttgggttcgggatccatagcatcatalcttcttctccagatccattccacaatttttcattccttatcc  
atgggcatatgacttaacggaccggctgcaactgtccttcccgcatccaaaagttgaccggtgattccctctgttcattgaggataccataac  
ttgcagacaaactaggcctcccgggcaatgtggatgtcagcgtgtctattaattagttggataataaccgtgctccgtagagatgtttcgaa  
aagaaagtagtagcaagcaaggttaattcgagaaaaattcaattgatattgtttttcggattgttgagcaacaaggtctcatctacatgg  
ctaggaagactcagtgatttaagcacttgacatccaactatgcaaatctcatggtctttcataaacatatacaaaaactgtttggctaatttag  
ttagcaacatacgaagaccgaacgattgagttgtattctccctaaatctttcaggcatctcgatctctacacgtagaaacctatgtataaata  
cgcagagaacgaattgttcagcagtagtactacctgtatcataacgatctaaggacaatagatccaaaaaggagtgaaacaaaattggaaacaaa  
atccttcttagctctgattatacaattccagtgaaactatccaccaatctcgtaacagtggtacgtatgagcatacgcgtcggagctcccttata  
ttttcagttttctccacagatataaccagaatcagaagcctctaaacgaagcatggctccggttctggcatagcctttttggccaaatagtcag  
cacaatgcgatttagatcctgtgcttgattccattgccggcgacatttttttataaatcagcactctcaaaccttgacctaattccaaattgaag  
cgctttcctcaaaaaacgcgtaaatcatatgaaagtgctacaatggctccagcaagtagttttacagggactttgggggcatggttagcga  
aaagcaacaaagtcggatccaaaatctttgtttacatgattacatgaatgaaaaacatttaattcaagcgtttttgtgtagtttggatatca  
ttccggttatggctgttaaatgtgaataaaaaagcagcctaaatcttaaatgaaagtcgcttctttatggtagaacgaatctacgcttacagaa  
atattagtcattcattcatttgattttttgtagtttctgtactgtatgtttttctataaaagaaactgacagtttaattgatataatata  
gttttttagcatccatccctcagatactgctatgcctttgtttacatgcctcggaggactcttcagctctctaaaccagcactttcttctta  
cattcttattctcatttggttaattcaaatctacaacaaaaattttaattgattaatttttagttaatatagattggcatgctgtcttcttctg  
acgaaattaccaggaacgttcaaggtcatcaagatcattcacactcgttgattcgcactgctttatgatcgattgttaaagcttttgactca  
ttcgtatcactagcttctgttatctaattcaggtatttacaacctactgtccctgtccttgcaaatgtccacgaaggcttcaatgctcga  
aaccatggacaacggacaaaattataaaatctttacatatactgagcattgtctgtatcactcgcggaacgtctcgtctaaacttaaaacgaaca  
atgtaaaacaaacatcttctcagcgtggagctttgattgcttctaccgcttaaaatgtgctcttgaaaaatatacaaacgatggacggat  
ttgcctagcgaacagatcgcaagtagccaggcattttcttctctcatcgtctgcctctatgagaagtcaactggaaatcaatttactttatga  
ttgtgctgctataatggataagctgacctttttgtgaatcagatacacagattatagttgctacgcgagattagctattattaatagact  
ttggacatggaagttcctgaacctgccatattcatcttggaaaggtccactatagcttgcgttattgtttcaatcaactcagtagtttagtgc  
acttctgcctattcccctcaagcacttctataacgtcagccgagaactgcaaaatgcttattgatcccccttctttcactcactcgcctatggt  
gcttgttctctatacttacttcaactaatgttttaagatgtcttaattgattccaaatctttcttctctgcctataatcaaaatgtgtaaag  
gactctggccctatgcttctgtctcgggtatgctccttaatgaagagttggcactatccaggatcgaatttggcaagattgctcgttagatt  
gctcttactgagcagaatgattgattccttatacttatactgtggtctcttcaatcttggctgttcatagggaggtgtcactgttaaaagg  
gttggttgcagagccaatagaattcgaattgtcaattgttttcaaaaatgtaaacctttgtgatccttcgacggttagatcttactgattaaa  
agaaatattgaaagttttataggtcttaatttttaagcataagcaacagaaacttactgaatataagaatttctgacacataatacaaatca  
atgacgttgcatctgttttctcggcctaattggatggtgttattctccctggtagcagaattgttaactaaagtagtacttactctcatatctc  
ttctgaataaagaatgtccaaagtgcaattgatgctttctcagaaatcaaaccttccatcgagcttttaagtcagaatctatctatccggatg  
atgttatctatctgctgaagtattgaaagtatactctcaggtccttcacactttccctgatgatgataaactaagaaccttttctgtagggcag  
cttttcaaaagcatttactcgttaataaagctcagttcagattctgatgcaataaggttatcaaaaggggtggaacggcttcttctgcttcat  
ttatctgctacgctatttgaagagactgtaattccttggataccctcgtatgcttctgacaagtcgaattaaattccaagaaaaagagtttcc  
caaaaacttcaaatctttgtataacactagtgtaaaatctgtacatacggaaactgttttcagtatattgacttaagtttctgatcacactgtg  
cacaatctttggatgatgaagcttctgtcttaaaagttgtgaaatggcttcaattattggacgaaaagctatagaaaatgttgattcattcaaaa  
aacttcaaatatgctagagtttcatcttctcaacctcatttaaggttacttcttcttagcaaggtgtgaaatggattcttaaaaattatgca

cattgatgaaagccatttgggagcttacattcatgcttcagcagtaacattctcaaaccttaagcaacgagatatccaattctaaagaacatg  
gttcgagtgcaatttctatacggattcttgaagaatattggatcgagagactgatttattagaaaaagcaaatgttctctgtttaatatctgtaca  
atgttcaataatgtgaatcttacttcatattacttggcatctgtaaaaaaagccgataaaattaaagttactcttcaaaagatccaaaaataa  
atctttacaagataattctcgatttatgggatttttactaaagatcaagccgaccagtggtacagtgtttctttaaactctctaattttacggctgc  
taacttctgcttacttctcggttaccgcatctccaggaggattaaatgatagagacatatgctttttaaactgcttctttgtatattacatgta  
actgaagcttagacgactactgttctgagctcttattgtggagactgtatatgaactttgaaagactacttacttaactctgctacgagattgatt  
gttgaattgtcactctgcttgcacaacaatcgcatttctgggattttcgggtaaagcacatcttgccttctagggttacaatttttaaaaa  
tataatagtacggatgaatgttttgaatgtttggaggggttcttctgctaaatatttaacttactggcaacactgaaaaaggtaagtacataat  
agatagattttacgttcaacttaacagagctctgcacactcaagaactaataatgctacaaggaaaagactgttctgggacaacagagcttatta  
tatctgattatttaatgatgtatgaaaggtccaattatctgaagcagtgatctattaggatacactcctcaggcactgcaacttaataacacagaa  
cctacgggttgaataatcgatttttctacttgcagcagaaaaagtgatcttaagattcaaaagcagattaccatggcaattggcccgattgct  
gtaattgtctatgatctgactgctcgaatctatgaacatattgggacagttgagggaaagctatgtattttaaacaagcaagcatgctgcctagcaaag  
agtattttctccttctcagtgctagctgttcagaattatcgttatgttcttactcgtaaagcagggcaaattttgaaagtgaggttattattcagg  
aaacagagagatgtgtacaagattctaccttctacacaaatttcttggaaatctggcagtgccgagttatattacttaaacgggaatatactgg  
ttctgtcagacattattctcagtccttgacttattagaatgttaaagcaagaagttttatcgtttattcaatcctgcaaaaaatagctgttctattac  
gaaaggaatgaaaggttaagtttctaacctgagaatccagctgcgaaagaaaaggctttgactggattgttctgttttaaatgataaagc  
tgctaaagctgcaaaagattgccttgatagaagtaacacgtggaaatataatgaagcgaagtcattgatgaagacatcatcaggaaaat  
attggagacttttcaactgttttctacatatcgcaaggcaagaatagcttcaagcagggcaggttaactgtgcaaaatgatccagtttga  
gtacccttcaagattctgtatatctttaccaggaataaccacaaaggaacagccgatgttattacaaaatattcttgcagcatcagaaaatc  
agctgttaaaaaacagaaaggtcatcttaattacttaagagagaagttcaaaacaatctgttgaatatccgtttaaactgtgaggttatcttct  
taatagtttgaacgaagtcagtcagacatgcagagctgtaaacagtttgatgacttttcatcaatcatgcaaaagtccttaacaaggttagag  
gagaagaatacaattagttctattgtctcatccttctttatggaaatccccgggcttaggcttcaaagaaaactattagcttcaaatcaagtt  
tcaattacagcctaacggtgagaatgaaattgctaatactttccgaaacaagcaaggactccgcatcttgaggaatttaaaggtttataaa  
caagttaccttcaacttggacataatctcaattagatcagtgagtcgaaggaagaactattatacaaaaattgacacaaaaggtcccttt  
aatctttcattaccttttaagcgacataacgcccagagcagatgaggaatttgagtttgaaaaagcagtcagcattgaaaaataat  
aggaaaaagtaatgagacggcgcagaacgggaaagattatacaacgaagcaagaaaaagagtcagtggtgaaacaaagaagagaactaga  
caatagtttagccaagctcctgagatacgtagagcttcttggcttggcggatttaaaggtatattctcaaatcatatactagatgctagccttct  
taagattgttcatcaatttatgacattatgagaagaatgttaatttaccggctctggagaattccattgaaatgtcacaggtattctggaact  
ttcatcactcttggaaaactgataatgaggatgttgaaaaactgcttgaagatctttatattctgttctcgacatctatcaatttcatggagtaca  
atgttctacgatgaggtgatatagatcagattgccgttgaataaaaggacgcattaagaatgtatcaaatagttataaaattggaaatactact  
agtcataccgtccttttctgagcagaatggttcataaatttccatgggaatcttgccttgccttgcacaacagtcagatcaagattgccttcatt  
tctattttaaagcttgcataatgaaaatttcatcaagaaccgtttgtgaaggtcatattaattcaggcttctataacttaacccagcttaga  
cctgaagcatacaagatatttcaaggtcagttatctacagctggttggaaaggagttatcgggcaagtcctctaatgaaggtttaaact  
catgttaacagaacatgacttttcttacttggacacggcgggtggaacagatatacaacctccagagatttggcggcacttgacaaatgtgca  
gtaagtattgatgggttagctcaggagcattacatgagtggtatttatgagccttgggggacgccttgaattatctcagtcaggtgccc  
caacttggtagtaacctatgggatgtaacagacaaagacattgatcgatttagtgatgccatgcttcttactggggcgtgtttctagtagaga  
aaatacagaaaggctcaatatatgtgaagcagttagcaaaagccgtaaacattgtcaccttcaagtttcaaacggcgtgcccctgtcgtgacg  
gaataccagcgtatgtcactcgaatattaatgatgtggacgatgaatgaatccttgggatggggttttttcttcttattattatacaa  
atthaatgttgaagttctagaagtcaataataaactaggacattcatacattagtagtaaaaaagcaaaagtcagttcagtgctggaatcaac  
cgttgaacgatttatgcggttagattcacatcagaagcagtagtggttaggagcggacgtagtagctgtaggaacaggattttcagcgggtg  
cacgtttatgaatccaatcacagacttgatttagatgctgtcctgtcaggcttctgctcaaggtgaactaaagaacaattcgttagttaaggtta  
gagaaaactcgagaaactacgtgcatgctggcaatcaggaagagacaggaagtttctgtgttaccacatgctcataaaattccttggga  
cgcatcataaaagttgatattatcgtcagtgccatgagcagattagaagaggcaaatggaattgattagcttcatcaagttttttagcactaaat  
gaagtttaatgtaatgattcagccaaaagaaatcatgtccataccattgataaggtcgcgcaacgttctagagagccgacagaggacgta  
agaggatcctggaaaagtcggtccatcttcttcttctggtgcccttcttctccataatcttagtataaactgaaaattggcatcactttgc  
taactgcagaaagactgaacaaaaagtttagtatttactcttgcagaaaaactcaaaacttaagcatcattgcttacgctttatatacgaataa  
ttaggcttctgatcaggatggcttgcacaataggggctgcagcaacgacaccgtcaatttattcgatgagctcctgaaataccgtattgaagt  
gacaaaccaccgcccattgaatgacccattaaaaacaaaggaagattcgtgtcgttgcagctgtacatggttagtctatgtcaggaggtgtg



cttcaaccaccgctacaaccttgctgtttcggggactggttggaaatagccaaatcctctctgatcaaaagagaatacctcaatattcgctcatta  
ggaattcaaaaaattcgggataaagatctacatgttcacaaaacatgaacgaacaaaagtcttgctacagcagctcccttagtcttccaat  
cctttacgtagagatctgcataataaactacctaacgactactcttcttacttcaatctaccggtgatatttggaaaatggcaaggaatacgcgt  
tgagaaaagtcattaatcatagtggtgagctcgttggaaatagctatttgggtgtaaacacacagaatacatcagagataaggggagaaga  
gaaaaaagcaatcttgattttaattagtaaagaactcaccacagatagaatttcaagatacctttaaggctatttattcatgtcttcgctatg  
atatatacatatctccagagtgacaaaacaagattcgcctcgaacgtagttcaattgagtttggaaaaggaattaaaaataaatt  
tctttcatttggcaatgctcccgtgaatagctggatgtcttacttggcaaatatttgaagcggcagatatactgacataaaaaatgggattaa  
gcaacgagaaaatcaacattcagcgcagtagttgcaaaaaattagaagagctataccagacgacatcgtaattacaaggttttagagttc  
agacttgatccttcgcttttgaagcaacaacgactgattagaaatataataggctcgaacaaatatttccgatgcaactcaagaaaa  
aacgagaaaacaaagtgaatagctagcttccattcaatacttacagtagaaaactgattacatagcatataaattgaatcccacgtcaaaact  
atgcatatttggctaaatggaaaaagcaaaagagaaggttcatcctagttcgtaaattccgacgatgttcttgcgataaatctatgaagtatg  
ctctcgttgacgtcgtttttgaaattccatgcttgtgagaaaaagatccccttctttggagaaacctgtttgcttcacgccttcttttcttcc  
tgaccttcttttctgctttccctctaaatcattttcccgaagaagtgactccacaagcagacataggatcatcagggctgatcttcttatggg  
tgaagtctgattttccctgtctctaaatttgttcatataccaaggaagaggtccttatgaattaatacaaaatataaagagaactcatacct  
agtccatgcttttcttataattccagctcgtgcccgtgcttttgaagttctgacgatcatgttcttaagtataactgttagacgataact  
ccaaggaagtaacaaccagctgtaaaatagtaccgcttcttcttctcctccagaagtttgaacactgccccttggctcggctcggaaatccgg  
caattccgtcaagcctctcagctcctgaagttgttctctgattcctaaaaatggattaggtatatttacaggattacaagctctttacccttta  
gcatgttgtcccagagattcgagccagttcttctgacgtcggacgcgctctacatttttctgctataaactgattacaagttaacgcaattcctt  
ttgaaattgatattcatgacaccgtaccattccagcttttgtttagcaaatcaatggcattgtagtttcaaggtagttgcaaaaataacttga  
ttccaattagaaaaaaggttcaatagatcttttagctgatggaagctggataaaattcaataatgtacataattcctgaaactcggctcctgg  
aaagaagatttctgaaaagagtaaggttgaatatacagatcgtttagtcttcttccaatttctaaattaagaagcttgaatatttcaaaat  
aagaactttgaataaaagagtatttctgctgttagtctggttagcttataagttaggtagctgtgggagagcttaggaaaggtcaattgaaat  
gtaccatataacttctgaaagacaatcatcattagatagatttcttctataaaatcatttaaataagccatactggattcgttcccttagacgtttt  
cgttctgctcagccctttatgaacaaacttagtcaaaacatgtcaatgtaatttagttaaataataaacaatattgaggaaatatttgccataga  
tactctttaaaccataatcttctggttgaattggataaaacacaaggttttattcacgaacgcgctgtaataaaacctattccttccaaa  
caccattattttctacactgctcgcggaaggagtaagctgattttacgattttttgatatttctgacttttcttcttactatcgattgtttc  
tctcaaaataggaggacctttcggatcttcaaacacgactactgagctcgtcctttgggacaaccttcatgagttcagagcaaataggtgatt  
ctctataattggggaaatgaaacagcgaataatttgaagaaaacactcaaggaacgactcgttctcaccttcttctctgaacctcctaactgag  
atgtttgttttctgttaaaatcaaaattcacttattaactagaaatcattagaaaaatacaaaagaagacgtgcaacatgaacagaattc  
ttctcaaaaaatacaaccttcaaagatctgcttcaacattatctagaatgagactatagattcaattggagaggatactttcaaggaagt  
aaccagccgaatcccagttgaaaatcgctcgggttattgaaagcatccacctgtaaactttatgtccatgactcattcgtataagctttg  
gctctaggattaattttgtatcggtcacaatggaagtggaagagtgccatcctaactggacttactgtgtgctgggggcaaggcctccagca  
caaatcgtgctccgaatatgaaaagtcaatcaagcaaggcaaaagcttgaaggatatctgtaactattagcaatagaggattgaaatcttatc  
aaagagatgtttatggtgattcgattaccattgaacgcaccattcgtcgggaaggtccagtgaaatataagctcgggctcatgatggaactgta  
tttctcaaaagcgggaagagttagacagatatttggatcacatgggacttcaaataagataatcctatgaacatattaacacaagatacggcccgtc  
aatttctgggaaactcaagtcaaaaagaaaagtagcagcttttatgaaagggattcaattaaagcagttagaggataattattcttaattgaa  
aaagcttatatacagaaaaatgcttggaaaggaaaaaatcaggtctccttatttagcaaaaaagaagaaggtgtaaagctaaatggga  
tcagctcccgtgaaacagaaaatcttataacatttggaaaaaaagaaagggagatggcctgggctttagctggtgaaagtgaaaaggaacta  
ttagctacggaaatggagctgacggcagctgaagctcgcgttaatcaatgcaacgaagaagaatttataaaaaagtttgggtgagttcg  
atgaaagaatatcacttaaaatcaagctatggaagctcaaatccttattacagaagctaaagcaagattgaaaggcgaattaaaccttc  
gaagcacatcggttggaatgagcagatgtagacttacaataaagagatattcaaaatagtattaatgctcgaaaaactgccttcaaatataa  
ggaccaactcgttctgaacgcgaacgcaaaaacaataatgatgtcctgatcacaacaaagacttgatgatatttctgcttacaaggcaga  
ttgcaacttgagtgaacaagcagtggaattagaatcaaaaagaagcagcttatacagacttccctgaaaaaggaggttaacctttcttcttc  
ttgacaaaaggacgctatagctaagcagttatccgatcaagcgaagaagattcggattatggaggaagttcagagagacaagctgacagcttt  
tggtaaaaacataccgtatctgctacgattaatcactcgagaaactcgtttcagatcctcaaaagggaaccaatgggtcgatttatgacggtaa  
agaagaaaaatggcatctcagattgaaaggtataggaacgtaataatggattattgtacggagctcacgacagcttatacttaaag  
aattgatcgtcgtccaactgtaacgcttccattgtcgtaggtcgttatgatccgtttgattattcttctggagagcctatcacaccgtattccactg  
ttctcaagcaattcatttgaagacgatgaggtactgcatacattaataatcattgggaatcgagaaaatgcttcaattgaggacaggaag

aagccgaaacatacatgaaacgcgggtgtagtaaatgtgaccaatgctatgcattggaccctagaagtaaaggatttgatttcgtatagtaagt  
aaccaacgatcctcaggatataccaaagttacaccgtggaatcgacctccaagaatcggctactccaattcaatggacgctaaacgagaacaag  
aacagctagaggatttaaagaagctttatgaaaatgcaataatgatcttctgcccgaacaagaacaaggaaagtagagaagaagaac  
aattgttattgagaaagttgaggcgattaaagagaaatgttgataaacggagacaggttaattctttagagtcagtagaaacatcgggtgctg  
gacctgagaaaattcaaagcttgaagaagaagatttcagaaaccgagaaagagttagaagttataccggccaactcaagatgctaaaaat  
gaagagcgaaggatagtgaggagcaaaacccgttatagaagagattaatgttcaaggaaaaattacaagtgaaaatcaaaaattggc  
aactcagcaagtcgaaatcaatcaatcagagatgaaagaacgagattggaaatggcgcaaggagtacacgaataagtcggatcatacctt  
gaatgagatgcgagaaaaagaggctaaacgaattcgggttcccaagtagtggcagaatacagtcgcaaacgagcgtactcgttgcgagcgagt  
tcccgtggaacatacaccacaggagttggacaatgaaattgaacgactgcaactcaatcaccgaatggcgaatcggactggcatctctgtag  
agcaagcagctgaagactatttaaaggcgaagaagaacacgatcgatccaaactactggtatcgaaactacaactgcttttgagacattgga  
agaaaacctgaggaaagcgaatgaaatgtgggctaaattagaaagctaattacactgctactaaggaattatttgagctttatttgagtcagcg  
gaattttacaggcaaatagtaattcgacatcaagatgaattttagagcccagggtgatccagccaacaggaatctctcgatcgcgagccg  
tcaaacgctgctcaagttagtgcaaggtttatcaggtggtgaaaaatcatttgctacaattgcatgctactatctatagggaaagctatgagc  
tgtcccctcgatgtttgagtagttgatgttttatggacgctgcaatcgactggtcagcatccgaatgatgggtgactcagcgaagactctt  
cgaaaaacagttcatattcattactccacaagacatgggccaatcgattgacgatgatgttgttgttttcgttaagtgatcctgtaaatcct  
caagtgctttacctctcactcagctccttaattatgtttcgatctacgacttaacttttttctaactcattttcatctttgcttctcactag  
ttcgttcacatgattgatttttctattttgctaaaaattgaaatgaaaaggcacgtttatgttacttaatagtttcttcttactttcaaaagtacct  
aggtagggtagtgactggttctgtcttataccaacataaccgaaaatagaaatttaccaagtcactcaccgaggacataaaaatgccaact  
cacgcttataagaatcgaagcttctggtcacgtttccgccggtcacggtcgatcggcaagcacaggaagcatcctgggtgctggttctgctg  
gtggtcaacacatctccgtactcactggacaagtagccacctggttactttgtaaggttggtatgcccattatcacctcctaagaacccttg  
tggcgtcactgtcaactggaccgtctctggactttggccctaacagagaccgtgaaaagtagtgggtaagaacactgaggttgcctctg  
attaatgtcctcaatctggctatgccaaggtttgggtaagggctgcttctgagctcctgtcgttgcgaagctcgttatgtttctgcagagct  
gaggacaagattaagcaagctggcggtgtgtgaaactgttgctaaacaaaaagtaataataaaaaacactgagtcgtaaatattgggtgtg  
gtcggcagtagtagaggtatatttgatgcatctgtaattgtttgtagtgatttagcttgagagcatattttagatcgaatgaaatcaatctg  
ggaacgctgatggcaattcattaaagtagctgttgattcgggtatgcttttaagaaaggtgatgcttaactagaaaggagttaaattatgg  
taaaatattcaagttgttagatcaggagtagagttgtagacctggcaagaaccataccatgaatcgatcgaagaggagaaattacaa  
actacagaatattttcttatgtacgagttgtatgggaaggaaacattagtaagttttcagcttttagcagttggttgcgtttgaaaagtggtgca  
aatactttcatgacttaagtagaggtgattgataatggactcaaacgccagcatctacagtagttaaactctatcagctctacgtatcc  
aattagcctgtttgcaagccattttgcaaaaattatagattgatcgaagaatgggattgccaatggaaccaaatacgcgtgcttaacgga  
tgtaaaaaatgcggaagtttttatatttgaaaaaatgctctgtgctacagttcgcaacatcgaagaagaagatcagacctacaaaagg  
acaaattgcaaggatggaacaggctggttcatcagtgtaatagttgaccagtagattgagtttctgttgggtccccagcaaggcttcataaa  
agtagagccgcttgcagtagcagtgatgctagaaggacagaggaagccagtagtcaacaggcaagttcgatagtgccaagacat  
cgaaaaatagaaaggtagacaacgacagaagtttgatcttcaggattaaatggggcttggctaagaaaaaggagcgcgaggcacaata  
agcttcttctcattgagcctctcagacttcatgtctactatthaacattttatcttctcgtacctttcccttagtaactcagtaacgatgat  
aatttggttctttctgtgtaaacctttactcagatagctgtgggagaataactatagatgacttaataatgtaatacaattgtacaatta  
aacaatggtttttatataaaggacagaaaataaactgattcaaccctaaactttggaagtagcagtagtttgagtagtgaagatcagactt  
ttcaatcgatgtagacaaaattgacctatgtgaaattggatatttctcaatgtttctatcattactaaattttccgctcaacggaagcacc  
ctaccctacacattcactcattcactcgtgcaagtaaccgacaccattccctaccacggtcatgagtgaagaattgggctcaaaggtctac  
aaagcgggtgcaagcttagattaccatctacagaggaattcgtgattttagacggcaagacaccggtcgtgaagtatactcacaactc  
ctcatattgaaggatccacagctagaaaagatgcagaatacctaggaaaacgacatcgtgagcacttacctcgttactgctattgcacgtg  
gatactttcgggtagattgctttaaagttttccaatctctcgaagcagtcatagaacaaggcctaacaattcgacgaatggtgaagtgaatg  
atactaaaacacatttaattccttttaacacatattctgtagtatttagcccatacagctacggtagtgaagaacccgtagatctgctgg  
agacgaaattgagccagatcgaagatcaatgtggtgcaatagttccatgataccattcaaatgacatattgagacagggttagaca  
gaaccagcctttgttcgagaagttttgcttttagctacggagtagttgttttatggggatacactattgaagaagaacacagattttgcgaga  
actaggtcggtttgagattgagaaatgaatgtaattaacaattgatcttttacctgattcatttgctttcattcaagcgcggggaacgctc  
tagtaactgttctagaaatggatgataggaagttgaagaatthaattattatgttacgaatctttatcaaccgagagtaagctttgttttttt  
tgagacgataactttctggtgagatgatttttaagactttattgctttgagagatgccttaactatagattcgggtgtctatctcatgcaat  
tgcaaatctgcaaaaatttctttttgaagagctgcaacgaaacctcgatgctaccaaagatacaccacagatgattgccgagctggtgag



ggtttgaaacacctcttctcaaagatccgtgtagtcatttattagtaaagcacaaggaaagtcgacgtagctcttgagagaggagcac  
attaccgaaccaaggaagaagcctgggacagaatccaccatttcgagaacttgctcaaagggtgctgcaatattaatgatcttgccatgca  
agaatcagattgcagctctgctcgtcggggagggtgattgtacgtagctcgatgaacggaagggttcttagcttattcggcgaattgggaatgg  
acctcagctcaagaattatagatagaaacagacactaactataatattaggggatttttggagaacgaaatgcaaaagccatttgaggacg  
ccgattcgccttacagcctggagaattgagtcattgttcgaacaacacgcggttatcatctgattcaacgtaccgcttaagttgcttacctt  
tctgtttatattgttcttagtgtagcgagacatgtgattcaaggtatagactatgggttaatgaataaagcttttttctcagccagctctg  
agcttgaactttttaacagatagaactgcttctccttttaaaaaagaggctatacaaatgtaagctatgaaagcaatcgtcgaatga  
aacctagaatggccttaaccttcggtagctactcacctcaattaacaataattttttattcgtttccgactgattgaaacctcattcatta  
aactttgtatacagaactaacagttgttcttcttgacctattgatctttctgaccttcttcttttacacctttgggaacctcactatagaataa  
aaaggatttggaaacctgtgtttattcaacaccgaaaaaaataatattagaattggaatggaatatttcttctgctcattctaaccgctg  
cttttagcatgaaatgagtttaacgcttccccattatgtatcattccccctgtaggatagcctataaactttaccttgaaggaaacctgcttct  
ttacatgttttagaaaactattacaagaagactttcaaaaagaagggaatatcaattcagcatgcaactgtatttgcgggtctctagtgcctg  
gacattcatggcagaaaacagcaacggtgaaactgtttacgaagggtgacgttcttaggtcactattaacgaattgtacgtttctatcaaa  
aggccttttgattgaccaattgttcttagggtaattacctattgttttaacaaaactgggagtcgagtgaaacaggtagctgaatttcttactggc  
gagcaatcaaagtctgagctttctcagatgatcgaagatccaatagagaagcagcttgggtattagcctgtaaggaatttcttcttctg  
ctaaatcgcttctcacagctccataaccagaagaagcaagtaagatctgtgctttatgagagaaagagaaggttactaacattacaggatct  
ttcaactacatttctgaacaagagttacaacacgaagttacagaatctattagcagaacacaacctaaccattgacgctactaaaagagta  
attttctgataaaattcataaaaaacctaacaaggatatactcacaataatgcaaaaagttggttcttcaagaaagattctacctggtttcagg  
aaactcaaaattgttctcgtcgtcttcttcttattgtactgctttcaagctaaagctatctcgaagaattcgtcgttctcatatttctgggaa  
ggattcgaagcttcttgaaggtcgcattcttcatctcgtgatcctaactctgggttcttcaaccaaggagtttctaacacggctggaat  
taatcgtttaagaaaacaatatattgcacctacataattgtctttattctaattcatttctaaactctacatacctagattgtttacggttagt  
cgtttcttacctatcactaaagaaggtaccaaggcatgctgaactgcttgaaaaacaatagacaagaaaacaagagtttctgacagacttcta  
tgctaagagattatgaagaagtagaatgaaaaacagcaaaaataagtaaagcttatttggagaatccgttaaatgtgcatggtgaagaaaga  
atgtccttggggtgacgttgctaagctcgaagggttaatatagatgtctcaatacaagaaaataaccaggcgtaataccaatctctgcct  
acggctaaggaagattacagaaaacatggttgacgattggttgaacagaggtcaatagctattagaagatgctgtcaaaatcctgatcaaga  
ttcattacctcagtagttttgtgctacaagccctgaatccatactgttgacattaccacagttaatcgctaagcaaatcttattcgaaaa  
acgaagggaatgtttattggtatgctgggtgctgaagcacaggttgaatttcgaaaaagcttggaacttagccgtgctagtgcattgcaataa  
gtgatgtattcttctactccatctattcccatatagaagctatacacaataataagaatgactcttctactgtcacaggtgaatcctttatt  
aaacgggatacagctcctcggctagttggctggcccaagcgttagttacgagcccaccaaggtttacgggtgactacaacgcaaggtaca  
aggataaaaaaggatcaaaagaaggaaaaaattgattgtctatcatgacggtattctagacaggttagctatgacgtgagtgaaagtaaca  
aaacctaaaacaatttttttattgagaatcaaaaaatgattactggtagcttcttctgattgagcgtctgcatggccgaagtaaatctgaagta  
agcgtcttcttctgcaacatgaaaaatgttatctagtgggttaataagataaggtataagatttacttacgcatctgtaaacacaaagt  
tctctagcattggtgttcgaagataatgattcgaagtgagccatattatcctcaaaagaagaccattcaaaaggtctgtagtcaaatcttctgca  
gcgattctgaaaagaacgaaaaatgggctctgctagaaggagagctcagggggggcttgggaatgaagacgaatattgatttggatgtt  
gctgggatgacatgagaggcattgaaaacggataagagcgtaccaataaataagaacagaaatcatcttctgaattgattttcataaaag  
attgacctgaaacgtaagcttcaaccattgacgattatacttatcaaaatggatagcatcaataaccgacatgaagcatataacgctgcaactg  
gatctcaaacctttttctgtagtataattatggaagaatgcgttcttgaataaagaacatgcctcttcaaacattccagttcaggaaga  
aatccggaaggagatgatccagagttttctcagagtgaattttgtatcgtttcaagatgcttctgtgtaagatgaggtgattgaaaatgct  
ttgtaaacaggagatgaatccagagaagaaggagatggagtcgagagcgaagcaggtaccaatactcataagacgactatgacacgcc  
ttatgaggagaaaatgagtttaattcttcttttccatacacggatagactctggcagttgctcgttgacaagcgagaccaaggctggaaa  
gagccagcatgatccaaaagcttaggcccaaacgtttacaattgcatgcacaccttctgttctgctgctggcgatcgaacaacggaccttctg  
ggattatctgattgaaaggggaatagaccaacgttacagaacgcacgaaagatctcccctgtattgtttcgtgcatcgttatattgaagtc  
ccgcatacccagttcccgatagctgacaatacagtagaccattcgttctgtgtcgggtgaacctcggacagaggcagtttctgcttctgt  
cgaaggatagcccaaaatcactacctaagaagaagaccatcgttccatataaccagcataacttcttccagttcaagcttctaaggaaaa  
agtacatccggttgattcaacagctccaaacagccagatgactgattcaagagcaatatcaaaccttggcggcaacaacgttttcttcttca  
atatgttagtccaatgataagagaagctactagcgtttctctgcaagttcgcggatacagacgaagcttttactgaaagagaaaccttctaag  
agaaaataggaaaatggaaaaatgattacgaaataacgaaatgaatgaaagtaaaaaaagaatcaatcaaaaaaagaaggtaaaaa  
aactattattgctgattgacatggaaaaagaagtgaaagcagatgttctatgaaaattgacgctcaacttagtcattcggcaaatcttatt

taaggatgagatgagggtgttttctttaaagtgtgaattaaatgctatttgctaattggttatcaggtcgagattcatttgcgagactttcatgct  
cctatcctgccatctcttgaaactactaccaaccctccatccatcaccagtgaaaaagtaagactttgcaaaaaaggctttcaacagttgg  
aaaaataattccaatagcattttgtgcttgtaaagcaataatcaagcagtgaggctttctttacacttgcttacggttcctagaatcttgaaa  
cggttctctcgattcgcgatagcgtgtttacgttcataatcgtaaagaacgcgctttggctttgaatctatcaaatcatttctttctagaccctc  
atTTTTtaggtgtccgtttgttctttccgggacttaccagcctctctctgcttttactcttgagcactattgatagtgagcagcttgtgtatt  
aatcaatcttttttttactctttcgctccttgcaaaagcaacatttctccttgcttgttttcaagctttttcgtttgatttcttctttctttt  
gatattttatgcttttctgttttcttatagccctttaccctttttgctttttcattcatttgattttttccaataattcaaatTTTgttgctt  
tatcttactctgcttttcttgattttttttgttggctttggattttgaatctttggacttggtgatttctataatcaaagttgcttctgctctactttt  
tattgcacaagatttctgtttgttgagcatttgcattaatcgaagcttgattgaaaaaaaaaacttttcatactacttttcccttcataaagt  
gtcgtcttttgatatttgcacccctgattcacaatttctccctcgaatcatacaatagtggtactaattgaaataggcattttcaaaaatcaa  
tttctttgtaaatttccggcatctttgattgataatactatactttatccgggtgaattctatttcttacctactatccttgacagaacttgagca  
tctttggcatctctcattttggctttgtgtttatTTAagtttctcccgtcctcttttatattgtgttgcatttactttccaattttatctaattttgtg  
attattgggtcgtcagattttgtttcaattttgtctattctaaaattgctttggatacattttccatacccgcttataagatttgcgaaggcatta  
gctaattgtctattaacaaagcggtgctttcatcaagattcgttgggttggacaattctatttcttggacaatttacttctgctttcagttctct  
gcaacttctttatattatattaagcgaatattgacacaacatgttctggttggctcaccagcttagcaagcaacctcctttgctatcaaaaaag  
gcttctgagtcgtgaacattatggacgacactattcgtggttcttctttggctcctgctgggattctaaatggcgaagcaggggtcaagcgttgc  
atatgtctcccaaaaatccagaacccaggttaggaaaagctgatcctgattattgcccgtcttatgcttcttgaatccattgggggagaaatccac  
cactccactggaaggctgcttgggtggtttgaacgggggtttggcgtctgcacctctaaaatgagcattaactaccagattctttgctataaaa  
attgaagatctacctgaaatttaactctcagaaatTTTctgtacttctgtttgctaacaacgttatatctatggaattgtccctcctacatctg  
ataatgatactgcttatggattaactgtgtttctccagagacgcagctctcgggctcgtgatgttttactttcgagtgatctctatggctttgcaa  
tgtaccgtcattgataattatcgcaatctcagcaaaacaaatgaagcagggacagaaggctcagaagtagtgctcgttttctagaacc  
attctctattcgtcaactatttgtaatcgtgatattttacgccgtccaagcaatcatatttgaattctgctgctggccataatgatgttgcttacga  
tactccaaaactcctttgaatgaatcatttgcagcgtccttagtagcatttgcattctgatcggctatggctgctgttccctgtgctatccatt  
atcgttagccaatgctcttacgaaggatgatgtcttctcccacatggtcccctaccgcaataaaaagctctattttacgacaagataaccgtccctc  
ccgttatgagatttaactcatttgcataaacacaacgtttctcggccctgctccttcagataaggaggttatgcattcactgagtgcca  
atctctctatcccagattctttcagccaatgggtcctttgggtgtaacagctcctccttaacacctctaataaccagagactatcctgtgctgctca  
actgttccacttccactccgtttcaccttacgcatcgatcatggtattcatcaagaattcccgtacaacgcctaccaacattaatcctgccga  
tcagaacctccttgtaataactatttactgttgggaatcttccgccctctacatctgaagatgaattaaagcattttctaacgcaacctggctaca  
agcgtctttgttccgtacaaaggaaatggccaatgtgtttgttgaatttgagaatatccctgtgctatggaagctttaaaggcacttcaaggt  
gtttgttaagcagtagcataaagggtggtattcgccttagctttcaagaatccgttgggtgtacgttctgctcagcttctcataaccaggttaa  
gttctgtaaccttattctggatcgtgaacaattatgggtgctggattttcttaatgatacaggtcagatgacactcacaatagcccagttggg  
ccaataattaatgatggcaaatagattctctcagcatttccagattcgcaccgttgctataactgccaatagaatgccttctgacttcatgtttca  
tatgtatccttggttttttgatattctgcatgttgattttgttattgggtcatttagattccttctaattcgtttttaattgccaagaactataaaagc  
cttctctatactaagacttaatgaatttaaaggcgaaaaataccgttgagagattaggagaattttcaatattttagtaattggaaggctttgt  
ttttgaggtctcatagtggttttatgtaaccatacactgctgctgaaatattcaaaattttgctatcttttaagtttagttgtttgctttcaattg  
tttaatgaataaataatgtagattccataatgtgaaatataaaaaatattgtgagaactaaatttaagattggttacgtttcatagaacgtttt  
gtatgaggtaaaaaagaagaatttttgccttcatattatagtaacttaagacctatcgcaaaccaaaccaaaaagaagatgtctaataattcga  
caagttcttttttttctcagatcacatctactcactcgcgcagctttgtacgatcagaagtggttgcctttctgctgactcatctgaagact  
cactgctatccgaatcagactcactttcattggattctcagtaaatttggcagtatccttaacagatgatttaccgcagattccattgcaaccatg  
caagtgattctgttctctctggagcttgaattccattactttatataaatctttgtccaaatattgtacagagccatcagagctggcagaatgag  
ataatcagatacagataaacagcttttactctatttacaatgtagtattgagaaaacgataagaagaaaaaattaagtgtacctttttcatgag  
caacaaattcctttactacatccccggagctcacatcaaaaacctttatggaaccgttgcgcaaccaacaattaaattgaaatggaataaacaaa  
ggcaattaagctgtgtgtagatttatgactgaaaaaggagcttagatcctaaaagaagaaaaagattagtaaagaatgcaaaattgctttgtt  
taaatgtacatacaagcttaaaccctctaaccacgtcgagacatgacaacaaaagaggaatcattgagaatagaatcccttcagggata  
aatgacaaaaggcaacacctttccacctttaccagcaataagatcccaagtcgaagtttctgctctcctcaacgctgaaagcaagctttcagaa  
ggatgaaactgcaattccactaatgccttttgggaggaagactcaagatgaaacagtaaccaagaatctctagaccacatagtgattgacc  
atgatcgtggcaagctaacaaagtgtttctttgtaaagcacaggctacgagaatagcatttggcaaatctgtagggatggctaaatcagcaatttg  
gatattgcgactatgatcgtaaattctagatgtgtaattggggaaattctatgaaagcaaaagcaaaactagacgatcaaatggcttactgt

atagtttcatctgagctagtggaagctaattggagtcattcgtagctaaagcggtagagcgctttcatgagcctcaacaaccataaaggcttc  
gattctttcttcttaggtcaacatctacaccatacaggagtgagaataggtccaatgacgattctaagcattctaacgaaaaaggattcaaat  
ctagtacacagtatgtgaactgaatgaacagaaaatttcgttactatcttctaaaattcttgcaaccgagcaaaaatagaggtttactttttataa  
gggtgatgggtggaataaataaggacctttcctaagggcctgtaactagtagcgaatcgacttttcgacaacactaatacatggtgtttattgtc  
atcttctcctcgtaaaagaagaacatctcgttttaaacgctcaattgaacatttagtagcggcaggaagaaaatgaaaatcttcaagttgtgat  
ggaaattctgcaaacctctacttctctctatgaaaagcaacgtaattgtttccattcatagaagatcctccttttttttcgtaaaagtttg  
cattttctatttagttttctacagatctatttcttactactatttagtaaaatgtttattagtgaaagtattgtaaacgtaaacgaaatgta  
tctagttgagtaataaacaatggatggaagtgtcactggaaagatccaacaagacttttcatttaattcttttaccatttctatttactaat  
agttatttagtattgtctccgagtagactagaaaagatgcacaaacagtttactcgttcggccactgaagatttactgggaacagttaggtta  
atgtaaacggtttaaattgccaactgttttattcatacagagcgttgcaatttactttatctcatctcttgggttggtcatcttctgctataaca  
atactctgtagcattatgaggggtgagttgtcacggcaggaccttcacgccgatataaattataaaatcgagtggaatagacaaactaactctag  
ctgtatcgttgatacgtgaattggattgctgttatgctacgtgtatagcgtagtaattgacagggatctctccagtgactagatagaatgcaa  
gagaaacgatctcatttagccagaccagtcgaaagatttgaatatagactcgttttctgtctgataatctgtgctttccatccaattgtacgtt  
tctgtatcactttttattgttttcttacttgatataacgcgatgattccaataacgttctattataactaatcatgtaaacgtggatctgactcgcg  
ttgtagaatagaggaataaacagaagactctcatggcctttgagaataaatgtcttgaggaaatcttttctgtttttgattcttaaaaaatcgc  
tagttttagaatctatatttctgggcaaaagttgttctgtggaattagtggtgattgctgtatcatctacataaagcctgtgtacgatgcatagattc  
accacttgctgttgactgaggacggttacgaggagaagagactctgaaagtaaaaaaaagaaagaaaaaaagtaaaagtaata  
attggagatcaattctcactttctgtgtttcttttctttttttatcttcttttgacttctttgtccctctatggtttctatttactgttaaggg  
ttgctaccgagtttaaggccttaacattgagcttataatgtttaggcttatgttaatgtttgtgtgattcaaacagacttctgtaaagcagata  
aaaaccttcttgcgattccataaattgtgtgtaccaaccactagcagatacttattcaaggaattccctttgtctacgtttacgtaagtagtgaag  
ttgtcatctgcacacaccagcaaatgaacgcgaatggtttctgctataacactgctgttttagcttttgaagattttgtatattgtattgaaata  
aagattcagatcactgtattccttactctattcgggacgtttcttgagattctctgtttgtccccttcacattcttttctctcgtttcataccatca  
cccaatttattttctttcattctttgttgaaaaatcttctcctctgcagtttacgatcgcctatcttttctcattcccttctacctttatctgct  
ttcacgacctcataagctagtttggtccttggtccggtccttccattccttatcgaaatttcggtagcgggaataacgtatattttatacatcactaa  
cactgataaagagtcgtaaacacttctacaaaactttgttaacagaaagcaatcttgtaattacgtcgttcggtttctctcgggtgcagc  
gaaaaaaaaaaaaatcttagcgaaccactgcaactaactatcttcttccattcacgcctactgttttcttattttgggaaatttt  
gactctccagcttatatacctttttgtgggaagaacatcacgttttaactttgtctgtattttcgttttctacgtcctgtttctgttttggtac  
ctttttgtggccctatttcatctcattcttaccatcttcttcttctgtttctgttaatctttattacaaaagttttaccactaacctactaccgtct  
gtaaaaatccgttatcaactggacaaagttcgttcttctcgttttcaactttgttaattattgttctgtttagataaaaaatttctgttctttct  
ttctctctgttttccatcgttttctccttttctttttgtttttcttctcctagttcacttctgtcatgggtgaagattttcaaatgacctttccta  
cagggtaaatctttactcaggattcgaccaatatacaaacagcccacttaattccaatgtagttctgctaagttaaattctcgttggggcc  
ccgttcaaaccgctatcccttactgcttcttccatgaatcgccaacgtggctcccctgcagcaacatattcatcattacgtcatacaagccttt  
taccggctgtagaatcttattgttcatggtcatggccacggcatcgtcgaatgcccagtgctggcataaatgtaaacactcaacgtccaattct  
ccttctttccatccttctcggcaattttcaccctcaggtgactccaactcctcttttattcctccagcgtcttttctacgcctccatcttctgctg  
attctttacagccagccctacgggtcctcaagtagcttggctcgtcgaatgtttctctatataccaaatgttagtaatagctctctgctgac  
atgctaaaagtacagtgtagctaccgtcttctctcgtccatgcctccctggctctttatccgcacatgctttgctcctctcctcctcgtaaaatc  
ctctcgcctaccgactttgaattccgtccccctttgttgcctcaacctcggattttggatggctgatggcgccctccacatctcataataacag  
tctacgcactcagcaacccttcttttctgaaacattgtaataaccttcttcttctctgctctgacggaggtggtcatcgacatagacgttc  
tactggagttgagccttaattcctcaatagcttctacaataattaccagctgggtgatctggcaataaccgtagaaatatttttctccttatct  
acctcaatcatcgatccatcgttactggctgaacatcgttagtaacaggtgacttgtttagcaagaaaaatagatctgatgctttgtcaatg  
tcaatggcttagatgccgaagtttcatctgtggctccaaggatagaaatcgtgcttgaaggtgatgttgttgcgtagaactcctggacgttga  
agaagtgaggactggtaacttgagaaagaagaaaaatcgtcgtcgtgaaggaccaattccaccagaggttctttgacaacttgcaaatgatt  
ctctttgttcgaggttctcagcgatcagcgataaaggctcgtgatgacgaacaagtagaaggccaaactgttttgcttgacaaaagcagc  
taagttctgaaagaaagcgaagatgcccggcatgtcgttgcagcttacagcggctcctggctcagggtttttctggatctttgggtattttacga  
cccagcagcgtcgaataaagaaagacaaggaactactaatggaggacaaggctcacaatgatctccggagagaaactaagattgtctgg  
ttcaagcctcggataaacgcgtccatttaattgccattccgactgaacaggcaccctcagacttttaacaacgacaaaagatttccatagt  
ctcttttggcctcaattaaacgttggccagtgacatctctacaccttttggaaatgctcgtaggtgagcttggctcctatgaattatcgaatctcaa  
gtggctcgcctctcatgatacaggtgcacatactgagccttgggagggttctgctgctcctcagcatccttctttagatgattatcaaatga

cttttaaataatgcaaccgaagtattatcgctcgaagatgtctttatgttctactggccataaacgaataaccagcctgataattctgataac  
aaattagatgattttcaagtcctttgtttcttctgctttcatattcggccaactggcaatggctatcatgtcggcattcatattacagatgtttcgc  
gtattatcgagccgggctaccgcttgaccgtgaattgcaacgtcgtggaataacagtaagttatgtcaacgaacggttccttattccaccggc  
ctgggagacgccttgcttgaaagagggtaaagattgttacacaatatcattattgctagacgtgtcttcttggaaagattaggggactgtg  
gtagggtgggagttatccatcctcgcaaggcttacctattgagaaggcgaacgaactcttggaaatctgatcctcgttggaaactgttagtaccg  
ttggctctgtatacagattcatcatctcggctactgatattcctttgaatcgatattgcaatttagtccgacgatgggatgaagaaaactccagttt  
aatcccaacaaacgaatcttttgcgtcatcaccgggtggaagttttacgtgaaacctatcttgataaccgcaacagagctgtagccagccattta  
agaagagaattctgtgatagtgatcttttgagagtaaaaaatgccaagcctgaaaattgtcgaatgttacagagatggctgttcagatggg  
ttgctgttagatcttcaagtccaaaatcattgtctcggctgttatgcttgattgaagatgagactattcgtaatattctcaacttactattacaag  
attactcctcgggagctgtatgaaatgccaagtagcggccgatagctatgaacatgctaaacttgacattagatgatgagacagacgatct  
gactattttacggaaccacttgatagatagccgatttagttgtacattatcaactgcagttacttttgaaggagaaactgcatcagaaaaacgc  
ctacgtgttggctcaagcagcaaatgacattagctcgcactagtataagtaaattgtcctcaagaaactagtgtacatacaaaatatttagtg  
aatgggtagagaagcatcaacctggcaagatgggtgtgtccttcattgtccttcataatttcgatgtattttccctggtttgggatggaaaag  
cgtgttcatcttgatctataaatttaatacacgttcgttatgaagaggatcagggaatattatcattgtatgggtgatggagcggtgagaattgt  
gaaattgctttctccgttcgagtgaaagtgtttgtcctcaacttctactcctcttgataaatgtctcaaagcggaaattagatgatgtaaaaaggt  
attatttctttaagctgaaaagctacatcacagtttaattccgaagttgttgggtctgaattttaccatctaaagatgcagatgggtactcattt  
gtttatacacctattgacattagccaacacaactgctgtgtctataaattataaccgattaattttctgtatgttgattataatgataatgaat  
actgaagaacaaaatataatatacatatacatatacaactggatgaagaaatcggtcgcgtttcatctttatctgttatcctgcattctg  
aattgtctgtcatcctacgtaaagttagcctttcatcaaaaaatgagttgggatcatttgaagagcaaaagggcagcaattgtgctattaa  
gaaaatttaagaatatttatgttgattccagttgtattatgtgtaaagcataagctttcaagtagcaggaggaaactcatattatattatatac  
accagcatggtattaaaaactgcagaattggcaacagatgggtgtcattgaagttgaagcataatataataaaaaagctttttttt  
tatgaatatgaataataattataactcaacataacttaccagttcttggccaaacactagtttagtaaaatagtaggtatgttactcagaggt  
tacgaaatgaaaatacgcgtagcgcgtctataaataattttcaacaaaccactaacaatacaacaagcccttttttagaaacagtagataa  
tggtttctgagatttagattgacttttaagcattaaattgtatcgtcgcactattttgtggtcctttatccaacactcactgttcaagttacctcgtt  
tgtcaattgtataatggaagggcctctgggaaaaccgtgttgcattaagcagggtaaaaagattataaaagaggacgaagatattcattc  
ctgttccaacgcttctgtttagtctgtcgcactactgtatgtactgttcagtggaagatgtgataatgctgactgaattatctgtaggaaatgtt  
attgagaagctggcagaccagtcttccaattggcgaattacaaaaagaaaaggtattcaatatcgcgacgttggcagatgttctcgaaga  
tgatcagttgagttttgtcagattttttctatttaactagttgggtgaattcatgctatgttgtgttggataaaaagaagaaaaataatgtttcat  
tgtcgataacaagtcttataaaacatgtttaccctgaaaaggagctgaaagattcaaaggcacgatgtgtgggaaagataaaacatgataat  
gttcaattttcaattgtttgtttaaaattttataaaactgaacctccataccaacattatactcctgttcttgatccctacatatgta  
attaaggaaggaaggatactgatcttaatgcttctcagacaaaatctagcttgagaactgaataaacatcggtcgtattctgttttttttccata  
gtgacatggtattacctattctcaacgaatactgttcctattgcaagtggtaaacatccatcctgggttttttatgaaatttagacagaggtgt  
actgcaaaatataaaagtcttgaacacaggagcctcatgaagcttcttatcctttgtaccctcgttgtttttatctcattttttttttttcaa  
ctatcaaaactcctaaatgcaacaaagtttctcagcttcttatttttcaactcttttcttatattccctacagatacttttaacagtatccttc  
aacagttcttagcggactggctctgaagaccaaagtggtcttctcaactgagaatcctgtttcctgacaggatcgtgttttgaaccaccagc  
aaacaagcttactatagaaaagaaattcaaaacttgatctgaaaactatcatcatcttaatttctcgggtatattcgtttacagcgacaaatta  
catcataccttactgagtgaccaagttataaaatggacaggagccgaattctatacatagcaaaactactaagcagtcattatgtcggttactc  
gttttctgaaggtagttccgttgcacaaagctcttggacaatatgtaaaaaataagtagatgctgctatggcaaaagcatggaaagtttactttggct  
ttgagcgggtgtagcttaccacaaagcttctgctgaaggattatcccaacagaaaaacaatattgacttctcaaaatggttaagtaaaatataatc  
tctttcttctcctcttaaccgaacggaggagaatatggaaaagagcaaaagattagaagtagagtgctatatacacagtaggtgtatcat  
ggaaaagccgcttagatctttcatatagaaagatcacatgaaagctcaagcgaatattttcattaattcgcgtacgatgctcaaaattctgctag  
ttttgcctatggtttactaacaacaaatagggagggtttctttgtgatgagcgtattgtcccgttgatgatgaaaattccaactatgctctttgca  
aacaagttttgttgatgcctacctggattcgtacctgaacaggttcataccatcgatactgagcttgaagcaagaaccctggatgccaggc  
ctttgctgatgaatacgaagaatgggtcatgtctttgctaactcctccactgttaaagtaccctgatttgattgtgtgttaggtgtggccc  
cgatggccatactgtctttatttctgacctgaacttttgaagaagatgttgcctgggtgtcctcagttactgattctccaaaccccccaagg  
aacgtattactttgactcttccgtcgtcaccatgcctgtctcgcctttgaaccaccggtctagcaagcaagacattttaccttccgtcattg  
aagatagtagtccaagttgcctctgccttgatagctcgtctcatcctgaccgagtagctggtttttggatgacgcagcttcggctaaactgac  
aaatccgttttacgtgtttccctttcaataaacgcttacggataattgatcaagatgtaacgggtattttctcctcaatggatttcttagttgcctt

gtatntttacgtttatntttgttagaaaaaccaagntttccataaatgggtataaatattaatnttaacgctaagaattgaataaagntttgggc  
tgtctctgttgaatggntttccattcagnttttttattgtagacttaccaaatcttgttagaacctgttcttagatattagaagttgtaaaa  
aacaacaaatgacacattcttgttnttctctctttatatatactctatgtagcattgtcgttatttactgtgattcatcttnttatatgaac  
cttgtcttgcaaacattcaaaaatgagatttccatgttcttaaaaaagtgctcaaaaaaggagccaaaaatttcataggatgcaataagacaa  
aaatattatcacctgtagcttgttagacttgcgttntttagtatatcgtgttctcttcttcttcttactctaagtcttcttacaccttg  
actaaaccaaagcaaaaatnttctatgtcctcccatgaactatcaagattagaaaaagttaggtaagaatgaaagaagcttcttnttttg  
attcagaaaaaggctgaccggacagggcagggaaacttatgccaacgtttatcgagcgcaaaaccgcacaacggcggaagtgttcttaag  
taatccgaattgaccggaggaaggaaccctagcacggctattcgagagattagtcttatgaaggagcttgcaccccaaacatcatgtcgtg  
attgatgtttacatacggacaataagctgatgtcgtnttgaatataatggaaaaagacctgaaaaagtatatggatgcatacggaaaccaagg  
agcttaagtcttccgaggtgaagaattcacaagacaattgctaagtggttctgtcatgaaaaccgtgattacaccgagacttgaa  
gccgcaaaccttctcatcaataatagaggtgagttgaaactggctgatttggactcgcgagatctattggtattcctgtaaatcttctcaaat  
gaagtcttaccttggatcgtgctccggatgttgttgggttcaagggttacaacacttccatcgacatttggcttggatgcatacggct  
gaaatggcaacagggcgtcttnttctggttcaataatgaagatcagctacttaaaatcttctgctccttaggaacacctactgaacaaacat  
ggcctggcatatcttcttcaagaataaagactacctatcctctgtataaaagccaagacttaaatctttaaagccccgtttgacctctggc  
ctggatctactgcaagaatgcttcttccagcagagctcgtattactggccaagatgccttacagcatgcctggttctaactcttaaaaga  
tgtcttcttctcattggagagtgctcgttcttctggttttattcttcttctcatgattcctcaatggtagatttgcgaggtacaacttactcattcaag  
tgtacaatttggcttatctatcgcgagcatacgaactnttattcatttgttnttgaatggatttattatacatacatacatatataatattac  
gcaaggcttnttctcctgttnttaataagtacatccatcgtgtggtcacttaatgtcttcaaaagaatagattacaagnttnttcttctgntt  
gatatcaacgttaccaaaaatccacgaaatctcaattacgttagaaacataatgcttctgactcatggtactcaaatcagagtggctcgtaa  
ccagactcatttaaggtcttactatttactgnttnttggatnttggcatcttnttcttctccgaaaactttagtggttaattgagaataagaaagcatg  
aaaccataatgatggtgnttggagaaaaccagataatnttatacctttagcttnttnttgaaggaggagagntttagttaatacatag  
ctgggattcactaaatgattctattcaccgcagcagagtagcttnttggcttggatgggatcccagcagatgcttcttcttctactgcaattat  
tattcttctgnttctcaaacnttntgataatgaatnttggatactagtcttnttatacaaacatgtacctataaatgtattcagagtagcattcac  
attcatcttctacatctcagactgaaaaaagccttaaaactnttntatgttctgcaaaagacaagaagatggttctactgatcatgaaaccgaagctg  
tgtnttctgtntaaactcctctcactnttcccaaaaaactactcacattatagaatagcaaaagtagtaggcatgtaacttcaataatctaaac  
acttntcttactcgtcacaanaagntcgtattgtgtaggtacattgaatctcagcttntcataatgtcttctntaaactccaactgcaagntaac  
tgctatatctgaaaaatggcggatactcgaanaatcaaggctacagattnttntaaatntaataacattaatttagatccttaacagaaactgtat  
gtggataatggaagtgaatnttgcgaanaatntgctgacctgcccgtagttcaatatctgnttactntgtcatnttntgaaccgatggccaagtctat  
gcgtcgcgcaagaatcaattgcctcagaanaagtagctnttntaatgggctatattntgggaatcagaaggaaagggaaacagattggcataccat  
gttacagctatcacagntgcaaccagntctcgaagactagnttggcaaaagactatgatggattacctagaaactgntggagattctgaaaaagcc  
tactnttntgacctgntcgttgaaccagcaatgctnttggcaatcaactnttntaaagattgggtnttntcgtatntcgtcgggtaattggatntat  
agcaatccttaggaaaagatgaagattcattgacatcgcgaagcctnttgcgcgagatacgaacgtcaaaagtntcgtgaaaatggagagt  
actgtaattgagctcaacgacntgntntntntaaatgaaacaggtatgatggaagtatagcaaaataaccattgctnttagaaatnttgaacaaa  
ntgaactnttccctaagnttntgatcgtacacatacttcatctntcgtctntntatgnttgaacgnttactntcataaattcacctaactaaaatccgct  
atccgnttntcatatcattgntatnttntgaacaaaatnttntactntcaaatatctgntgctcctntgtagacctntaaagcaatcagaagtcaag  
taattgacctntcagcttcaatgnttntaaactntcaataacatcaataaaaaatntacgnttntctntcaagatntgntgaagcatggaacc  
gacagactntacgataaaaaagcagctcaaatccactcctnttaactnttagnttntgataaaatntgaccagagatnttntgaaaccatctgatc  
agagnttntcaaccatnttntaaactntntntaaatntcattaatntaatcatccaaaagcctntgntnttntgtaagnttaagntcgcctnttaattata  
aataaaagnttntactcaaacactntaaactntacgacaccgaaagatggaacattntgcaagaatgatnttntgacaaaagntcctnttactct  
tgagggatctcaatgntcaccactgntgatctcctntntgaacatcgtgaggtnttntacnttcaacgntgcaaccaacggagaaagcagntaccaagg  
atctcctntaacagntaccagaaagntcctntagcagggactntgaagcagatgnttacgagcagactntcaatgatctcgtcaatagaacgnttaccaga  
gtggacaacacctntgctnttntctgntcagcagagntcctntcaaacctntgatgacaaaagcagaagcggaaaggaacgagcggagacggcg  
gctntgacgntnttntggatgntcaactntgacgntaacgaaagacctntccagntcctnttagtagcctntggcagatnttntaccaacctnttaggagaca  
aaccaaggntcaactnttaggagcaagagntagaaccaccggcaactntcaccaccgagcctntcatgataacgntctntcactntcattntgggatc  
aactntgggagntcatntggntntgntgntatgntgatcaaatntcctntgntgntaactntgcaaaagntaaagcaaacacagntcactaacctntacc  
ccaaaatntcagcacaataaagaataaaacaatnttaggcaaacgaggaagntataatntgaataaagntaaacattcctntgntcaatnttntcatnt  
agntaatgatgatgaaaaataaactnttntcaaatgntnttnttntaaatntcctntgntaataatntgagagaaatntgcaataataaaacaaa  
atagatatgntaaagntataataaagaacaacctcaatntgntntgatctnttaaacntggaatnttagtaggntaaatcagnttnttagnttntca



aaggccagattcaagttccacttgatgtatataaagtgaaggttgaagcagcttcataggagaaatcgtaagtagagtttaattgcttccct  
ctttctgctgtgcttgaaggtgtttagggctcccataggcgataactctaaaccttttcataatactgtacagcatgggttccaatcccaaaaa  
tgataagcttttgtaagttatagagggtctctgcttctcctacgctgcttggatcgtaagtcataatagtggtacaaaaatgtgaatccttc  
aggatttggtagtgcgattgtcagaaagcctctgcatagcacgatgaataaagccaagccaatagagaggttgcattggacaatctggattc  
atcgcatatgctcactataataattgattgtggaatccaactcctactacgggcatgatatgtccatatagttaggaataaaatagggtcgtag  
gatgtaggaacagtcgccaatccgtcttcatTTTTGGATAAGGTAGCAGCACCAGGAACAGAAGACTTGTAATTAGTTGATCCATTGTTTACCA  
GACGAAGCAAAAACCTTTGATTAGCGTGTCCACGAACGTTGAGAGCAATCATAACCTGAACCTAATATACTGAAAAAGTCTGTAAGTCT  
TGACGGAATTGAAAAGTGTGAAAGTCCATCGGAGAGGACCAAGTGTGTTGAGAATCTCCGCGATGAATGGCGCATGCCAGCATGCACCAAC  
GCAAACTTGGCGTTTTATTGGATCCTGTTCAAACACAGGAGTCGCCATACCTGCTTTAATAACCTCATAAGCTTGTTCCACGTTCTAATTTGGCTC  
CTGGAGTGCGTAAAGTCAAAAAGGTGAAACCAAGAGTCGATAGAAACATTACGAAACATCTTTGTATGTA AACCTTCTCAAATCGACGTCA  
CCCCATTTGAAATGGGTAATTGATCATTAAAGCCTATTTATCATGTTCCATAAGCTGATCCTTAGCGAATGAATTCGTACGTGCTTGTCAACAAGCT  
AGTTTTCGATCTAGCTTCCGTTCAATAGGATATAGCGTTTTGTATTACAAATTCATCAATCAGCTCGGATGCGATGTTGAGCAAGAATTAAGCGT  
CTCCGAATTCGTGGATCGTTTTGCATATTTGAAACAATCACTAAGTTCCAAACCTCTTTGAGTATGTTCTGTTTTCAAATCTGTACTGGCGG  
GCTTCTTTTAGACGGCTAATCTGAGCCGCTTTCCATCCGTTCTGTGGTAATCTGTATTATTAGTAATCGAGAACCAAGATCACTCTCGC  
GACCTTCACTCCATGCCCCCTTCTATTTTCAGACGTCCCTTCTGAAGTCTATTACTAGTAACAATTGCCAACGTCATCGGATTACCTG  
TAACTCATTATCTCGGCTAATTTACAAGCGTGTGATTTGTTATTGTCTATAAGTAGAATAGCTTCCATACATTGTTGTGATGTTGCAATCTTTC  
AATTCGAGATAGCAAAGACCCATATCAAACCAAGGTGGATGTTTTGAGCAGGACCATAGCTGTTAAAAGTATATGATTTCTAACGCCAAATC  
GAGGCTTCAATTTCCATATAGGCCTTTGCAATGTTATTAATACTCCTGAGATGACTTAAGAGGAAGGGTTTTAATTATAGAAAAGTGGTGGGCA  
GCTTCTCAAGTTCACCAATTTTATCCTGCAATCCCAATTTAGCTCGTAGTAGATAAGGTAATGATAGGTTTTCTTGAACCTTCTGTACGGAA  
GTAGCATCAACCTTCTCGTTTTTCTACTGCTCCACTCGCATCATCTGATGCTCCAGTATGTTTCTGACTTCCGTCGGAACCAAGCGT  
GCACCTCGATTGATAAGTGGATAGCACTAGACCCTGATGGTCTAAAAGTAAAAGTTCAGCATAAAGATTCAGAGCGGGTAAATCAAAAACAC  
TCTTCCAATAGGTGGCACTGGTACTGGTAATAATGTGTCGAAGCAGTTCAAAGCATTAAAGAGCTTCCCGGGAGCACGAATTTAATATAGA  
CCTCAGCAAATGCTTAGAAGTGATACGTCAAAGGAGAAGAAGGAAGCAGTTGCGAAACCCCTCAGCTGCTTCTTCAATGATCCATGATCCT  
TATTTAAAATAGATCGATTAATAATACTCGTTTAGTAAATTTCTTGTTCGGTTTCGCTAAGATTGCACGAGAATAACAATAGTCTGTTGATCCC  
AAAATCTAGACTTTCATTGAGATGTGACAAGTAGCCACATTTCAATCTTTGGTTAAGATGAGCTGCAGCATCAAGCAATCAAGCACTT  
TTCAATATTGACCCTCTGTTGCCCTTACGATGGCATTACCCAACATTTTCAAGCGGCAATCAATTATTATCGATGCGAAACAATTTCTCGGC  
AATTTTTGAGCCTCAGCAAAGTTCTTCTGAGCGAATAATCGATTTGCAATACTCAGCAATGTTGAACCTCAACAGAAGGAACCATGTCTGCA  
CGACTCACAGGCCACGACCCCGTAGCTTTTTGGCGCGTCTAAACCAACAGCTGCTTCAAATCTTCTCCATTATTGCTGCAACCTCAGA  
GCCTTTTTGTGATGTTTTGCAACGTTGATGACGCTTCTTCTGCTCAGCATATTTGACTTCTGTCAGACCACAGACCAGCGGTATTTAG  
AGCAGCAGTATCCCTAAAATGATTCATGATTATAGTTAAACCTCAGACTCATCAACGAAGTCATTAATATCCATTAATAATCATGCACCTC  
TCATCCATCGCTTACGGTTGAAGTTCAGCCACCAACCCTAGACTTAAAAGGTATTACTTTTCTTCTGTTGATGTTGAGAAATATGAT  
GCTGATACACTTTTGAATGTTGGTGTGGCAAACCAAGCAGACTACATGGTCTTATAGCATATACATTTGATGCTTATTGAACAAAAA  
AGATGATTTTTTCAATTAAGAAGTAAAATTAATTTCTATAGAGAAACGCAAGACTTTTTTTCTTAGTTCAAACAAACCAAGACCCTGCTT  
GAATCGTTTTAGATGTAAGTGGTAGAATCATGATTAATCAAACCTTTTCAGCAAATCCAATAAAGAAAACATGCAAAAACCCATTGATTTTAG  
CAATCTAACTCGAAGACTGTTTATTAGTGTGCTTAATGATATTCGATTTTTGATAGCATAGAGTCTTATGGTATGTTAATAGCTACACCA  
AGGAACCTGGTTTCAGAGGTTGTTTTGCTTATAATAAAGCAGACTTCCATATGTTGAGAGTGTCCGATTTGGGGAACATAACTCCGCTC  
GGAGCTATCCAAGGATTTTCGATATGCTCTACAGCCCCAACGGTACAGAATCCTTGTGCAATGAGCGGCAATCGACACGAGTTATTGTT  
TCGAGAAAAACAAAATTCAGGTATAGATTATCTTTCATCAACCCAAACGAGTGTGCTCATAATCGCTTTGTGATTGATTGACTAACCATTA  
CTTTTATAGTAAAAAGTATAAACGATTTCCCTGGTTGCGACACTGCAACGTCCATTACTGAGAATTTATGAAAAAGGACCTTATCGT  
CCATTGACAGTGGCAAGCGCAAAACAGGAGGTAGAAATAACCGGTGCAATTACTGTGCGACATATTGGCGGTGGACACAACAAGAATC  
CGACTTGTGACTTCAAACGGACTTCTCCAGGACCTTCAAGGTGTACGGATTGAATATGACCCTGGAAGGAGTGGACATATTGCTTAATTGAA  
AGCCTGGACGAAGAAAAGCGGAAAAGTTATTTAGCTTGTGATGGCTTCAAGCTGGTACACTGTGAAAAGTTCCGTAATCTCATGGCGTTG  
GATAAGAATGGAAAGCTTCTGATTTGAATCCAGTTTTAATTGCTGAATTAGAGGACGGGAGTTACTGCCGTAACCTGAAGCGGGAAACTGT  
TTCCCTTGCCTTGTATCCAGTGGGTACATAATTCATGCTATTGGTCTTCAACAGGCCAAAAGCAAAGCTGTGAGATCTGCTGGCTCAAGTG  
CTCGACTCATTGCTTTGATGACAAAAACTATGCAATCGTGAGATTACAAAGTGGTGAAGAACGGAAGATTTAGCCTTCTCTTGTCTACAATTGG  
AAGTGTGAGTAATATATTGGCAACACCGAAAATTAGGAAAGGAGGACGTTCTCGTGGCTTGGCATCCGCTCACGGTCTGTGGTACGCCAT  
GAACGCTTGCATCACCTCACGGAGGTGGTGGTGGTAAAAGTATTGGTACAAACCATCACAATCGCTACGGGTGTTTTAGCTAAAGGAGGCT  
ACAAGACTCGTAAAGGCAAGAAATATGAATAAGCTTCTGTTCTGTTGCTCCTCGTGGAAAAGATAAGCGCTAGACAAATGACATATATACGTCCT

gtataaataaaaactgcttgtttgattttgtatgtctgacttcccttttagccgggtgtttacatgatgtttgagctttggcagttgaaggatcag  
ctttcattttttttgtgatgcattctcctcgaatttttaatcacttttatactctttttaataaattatattatattccctttgattgaaatgagt  
aaccttgtatcaatcaaccacgctagtgtagtagcaattctatatagacaacagtgcaaattgataccattagaccgtaatttttgacgctaagaa  
tttgttttctttttgatcttctattctgctatgttttctgctgctgctgggctagcggaaattcgttctaagagagacagctgagaaactttgggccc  
aattcgtttcctcaaaggattcagatgtttcttccatatcttcttttctgggcgattccttatgattagttagtaacaatatacatattcaaaagagtag  
agaaacaaggtagcagatacctttgagaactagaggattcggccttctgtaggggtcccatggaacaggtagtaacgggaatatagatgagcac  
ttttactttcttatccgagatcttgcataacggatttgatgtgaagaggagagaaagcttggaacaaggcttatacaggtattcagcattgtcatca  
aatcagaaaatggctcagatacagtaggaaaagagcttctgagcgacatcttcatctggataaccaagttacctgtgaaggggaaattag  
tcttctctgcatagacagcagcttttaggttttattaattgttcttaccattcgttgcatttaaccattcaatcacgattcatgctcgggagcata  
agtggaaacaaactttaaattgtcgttctgacatattaccacccagaacatggagtgctgttttctgcaatgtcaaactcatcgggtgctgag  
ctggattctgctcaggccaacagggtctctgtgaagaatccgttcttaccagcagcattttgttctccatccatgaatgaatcgggaaac  
gttctcgttttgcgaatcgtttgttttgaatttacgaaaccagggtcaaatagtgaaggatggctcgtattcttaaattgggtttgtttacaataaa  
agtagaaaataggaaataaaaaactgctatcataatacaatacacccttggacttgaagaagtagcttctcgtttgtttgtctttatttctgatt  
ttcgttggaaagaaaatcagccatgttcaacagtagaagctggctgctggttcaagagcttggtttctctgtgatacgtttgttatgtcaggtt  
ggttgaagcgtcagctcagcgttattggaatgaagccatccaatttagcaaaccttaccatgggtaggaccttaattggtagggtttttt  
gctcttttccacagaacagtagtatacaaaagttaaacaacaatgggctaaacccttctattttgtttaccttttaacaaaccccaacaaaac  
cccttatttctttacgaaagttgacaaagccaagcaagaaaagccatgtaaactgcaagaacaagtcattaaaaacctcgatttttta  
ctttgggtttgtactgaattatacgtgaaatactctgctctatttgcctcttctgtgtaaaattaacatacgcagcgaaggagtgaacaagat  
tccaaaccattggacgcattttatatactaaacaacacatgaatttgaaggattccattgaaattgaacaaaataatagaaaaagtcggcttttt  
aatttattgagatggaatcgattattgtagacatagtcgagatgaatccttctcgcgttcatgcatcgtactccgaatgtcctcgcagcacaaga  
ggaaaatagtgaaactcgttttcatatgtacaatcattgagaagagcgggctaccgtctggagtgatcagggctgtgcaaagcccttgcagt  
ctactccttctggaaaagttcctctcagaacagcaaaaaggattctagcaaaggattgggaggcatgcttcaagagtctttcaagtcaacatc  
acgggtgatatacactcagcggcttctgtgaaatctcgaacaatggcccctcaacataccatcctaacacctcagctctcgaactgaaggca  
aagacgcagatgaagacgatgtagacatttccacttcaatacagccctacttatgtctatgatcaattcctctcgtgctagctccacgcgcag  
tggtactgcccactctgcaccttctatcatgggcatgtctattcattcctcaagctgatactactcactcagaaggatacgaatccagaagcggctcc  
ccaactcagacattcaatctactctgtcaatcacagtagtgattcagaagatttctgactgggaaagtggtgaagaaggcgtaaagcgtctagtt  
attaccaatagctaatgatgatgaactggatagtgactagtcacattgaatgaatgtctcattttttataccatgctcttgatataatgacc  
ttgcatctgttttctttgatgtcccttattgcttctcagctttgacttgttcatcttctgtttctttttcattttctatttttaagttatgtttcgaag  
gttcatcgttcttttctcatggttaggtagatgactttccgcttttttcttctcccctatttattattgaatctatagttgataatttcggttttctt  
tgtcatcttaattcttaccgttaggaaagaaaatacggaccattcatttatttataatacagttattatagtagtataatttacagaaaag  
acaaaagtccaataaaagtagcagattatgccttctgagtcggattgttttcatccactaaagctaaaatgagatccttatctcctttttcatta  
tttttcagtcattagattaccaacaatttttccaaaagaccccgagcattaggggggacagttttatccgtagagagttgatcatctcctcaaaagc  
aataatgcatcacaagaacatccatgcagcagatttctcacttttctcttctgttgcctttttcatgagcttttcaacaaaatttcatagacct  
tgatattaggaactaaaagcaccgaatagcttctttcccattgttttgagacctattatagctccatagtgagttgataaggtttgtattgtcca  
agaaagcctttaaactgttctgttactcttggttcaatgtgtagtagatacattccgaatcgattacaacaacccctaaaagataggctgctaa  
atcccttaaagcataatgatcatggttatgtggatcattaccaaggcgttttgcaaccaggcaagttaaaatagagggcattaactgttgaacata  
tggtcaacaacaattgggattatcaaggagagcccaggccatttgcaagggtagtaagaataactagattacttaggttatgagagatg  
gaatcagaaagaaacataataaaaatagggaagagttgatgcaaaccgggatcgtctcgaaggcttgataacgcggcatttcgaagttctgag  
ttgacacatcagcaagcagcagtaatacgtcaaaatataattgaagcttctcgaagcagctgacgaactaatggttccactcaacattct  
ccatagatgaaataaccatttgacgccttctctgtagcggtagcagctctggagtaatggaagctggacccttaggagccactctccagttgtg  
ggtcagaggggttgggttttgggaatagcaggttgaacaccctcaattgctaaccaatgtgcagataagaaatatttctgggtacttttaggta  
gaggaaaattaataatttttcaaaatcaatttctcatcagagataatagagagagtttggccagcacctcggcagcttcatgaaattcaac  
aggccgagatgattgaagccgtaaagtggtcaacatttaaagctttaaagcggatgaaatgtcagcatttgagagtagcgttctgattcgaatg  
gaccataaactcattgcttctggattgacgttaacatattgtactctgacgaaataataagtgcaataaagagcaataatcttttattaata  
aaatagaagataaattgaaggatacaacagcaatgtctgcaacaacctagactttcctaacatacctgtatgacttgggtgatgcatattcaa  
gatccattgcgattgagatgctgcttcatcactaaattgctaataccaagcatttcagcagacatctttatggattctactgtccatactgtcaaa  
gacatgttggtatagagctgtgaggttcatcgtcgcgtttaggaatggaatagagagcttgagtggttctgttattgattacgctacgt  
tgtggttctttaaatacacacttttgattataaacaacattgaaagaccagttgtaaaacaaaataatgaataataaaataactttcca

atTTTTGGCAAAactattGGAAAactTTTTgtaatGAAAactagaaagtaacgtttgaaGctataggtgtaaAtgaaggaaaccaatggga  
tcttaaatggaattcagtaggatgcaaatgggactcgttgaaaaagttaggagtataactgtcttattcatcctcttctggtactgtttatgaaat  
ataggaagaatcttaactctagaacaaagcttcgtaaaatgattgtcaagatataataaaaggagaaactttatggaatggtgctctctt  
cacctatatcagcagtaggatcggaagctttttaccactgaaagtctaaataccctaaaaatagaggaacgtgcacccttatgagctacattcg  
gaaatgagagacgagaaaaatcaactggctgacttgatagtcttcttctgaaatcccattagttcacgagatccttggacatgacgacttaat  
ccaattgaagcataaaacgatataactaaagttgttacttcgctcgaatacaatattgtacggtgtagcatttctaccatgacacttaactgtcc  
taatgattgtcaattgtcactctactggttaacgataaataaaaaacaagacatataatagagcatagagtggatagagaaactgacaatgta  
atataaaaaatcaagtaaagaaaagaatTTTactaataatagtctataaaagttcgttgctatgaaacgactagggttgaatggattaatg  
cagacgaataactccatatttgatcacggttaaggactatgaaagatcaaatgttgattcttaaaaaaggtgtacataagatgcaatTTTatgta  
aataTgtttgTctctatacctatacttataacttagtgaatTTTgtaatTTTcaattgcgattccagaacaaactgttaatagattcaagctcatat  
atctatagTactattcctatacttactcagaagaaaagTctttaagggaacgttcttttcttatgtcgtctgaaagatagcatatgtcttcaatag  
aacagaggaagcgcatgaaagtagcaaaaaactctgcaaggcaattcagtatggtttcattgagagtatccttaaaagtgacgaaatccata  
gaaacattaattgaagcatgttctactgtgaaagttggatcatgttcattgactctggatggaaagccaaacagatccctataaataaattcttct  
taaagccttaatttacttcaatTTTaaacgcaaagacaaggccctatgatttgctcattctttctataTTTgaggaatgaaatgcagaatgggtgtt  
atcgccattaaagaaagggaaaagattgcaatggaatgctcctaccgtatgtacagctcctcattactagatTTTcagcttctgtttaccatta  
tagcacacacctTTTatgataagattTgtaatgatgctctataaaatgtatagcaagaaaggagcaaatgcaaaatctacagtgagTTTaa  
gtttattagaggatactctgaaagtagcatgaatacaaaaaattgaaacttttTgttgTcacgcacagtaacaaagcgaatttctgatt  
cggagttctgtagatcaaatTTTctcaactattccaagttgagcactataaaactcgttcagctccgtctcttagagattaaatctcctTTTta  
agtaagtttTTTTgaaaaagtaaaaagttgctccagcagtgactcgaacactgggccttTgcttactaggcaagcgtctaccactgagct  
acaagagcctgattagttggacataatgtaggtatataatcactgggtaaaggaaaatatacgtcgaaccaagttTggttggaaacgggatgtt  
aggTTTctctaatttctactTggttTgattTttataaatgcaggtTTTaccctcattcatagggcgTtgaattTaccacattTcttatgatctgta  
tcttcttaagagttcgtacaaccagatagtatcgtataccaagcaaacacatccaccccaaaacatcatgcttTgctgattccttatatgaagc  
agacgatgaattcaatcctTTTgcagatgctgtttccccctaaatccacagctcTccaatgtacagacgtctgctgaaccgcagctgaaattca  
tcaaacgcgcgggatgcaaatcaaatatccgcaagtttcttccagaaagtcagtaaattgaaatccttctTTTgaaacactcacta  
gattcagctccgtagggccattagaccattccagccttctactgaaattcagaaataatccttcaggatcagtgTtcatgaatcctTtgaat  
tcttagtaaaccttctTTTtaccaaaaactcTTTggtatagTggtgtacatcctcacggcttgcagtatctgaaTcaatccgTacttctcaga  
gccttctagtattaccaagaagaattacgacacaaagaagcatccgatgcttctcaaagactatgcttTgctgaggctggTccgatccttctgc  
accaccatcgcgccatccatgactcaaaaacgaagacagccaagTggtggcgagctagaggTccttctgttccacctcaaatattcaag  
tacatgatcctcatacagttagTgagcttTgtaagtctcatacgTttacttagTcagctcgaactggaaagTattctgTccaatccactgaagTt  
actgtTcaaagacggtacagggattTgactgtcttaccactTTTgtccaacaattatcctggctcataatcctcctcctcTgaaaagcaggt  
ggTggccggttagacgacgaagtagTgagcatcgcagctgcttagaggTcatgtTgcgcaaaattcctcTaccctcTTTaaaggaatgat  
tcatcTTTgaaaagTTTTcgggTggataattcGacactaagTtgacaaattacgttactcctattgatgctgcttcttctcactgcttctggctc  
gtctggcttactTgactcTTTcagctgctTTTcacacttcttcatcatctaaatacattgagcaagatccctTgcttgcgaaacaaaattatcgcta  
gatgctcTTgaaaccagctaagatccatgtatcatgccTTTgctTgtatagaccaacgcctgcaactTTTatcctcgatacacgactTggcga  
atcTTtagcaaatTgtcctTggtTgatctTgcttcttctcccaactTgacaatctatctcagatacaaatagagctTcagTTTctcaagaa  
agaaaagTtTgctcagataatctaacctgggtgtaactatcgaagaatacatccgtaatatagaaagTgtaaaaatgcttactctactcgaca  
aaaattatggcaggtTggcaatccttTtgcagTcacttctcgtctcagTcccagTtgataaatgtcgaagcaatcaaaattcagcaaaag  
tcttctcctacctagagatcaagTgaaaagTatcgagTtaaatcctcagctagcgcagcagTtTgagaactcaactgctTgtTaaaacatg  
attTgaaacaattTtaacataagggTcgacgattTgaaagctagTgtcgaactTggctggaatcagcaattgaatcGaaaagagTtgattg  
atagatgggaatcgtTcttagaataattTgctgcatatagTtTgtatttcttctcggttatttattcctaattgTatataaaagTtatttctccct  
ctTTTcaactactTTTgctaccgatTgtTtctcTcaccttattgatgctcTggactTgtTtaattgattTtgatgctaattacatTTTTatgaga  
cgttaatgaaagTattTatgtcTTTaaatgctacgcttatcaattcaattTgtatatcatgcggtaaacgctaaataaaataaattcttatattc  
ttcagcagTcctaaaaagcatatacaacagatcaatacaatggtaatactactcactTgaccgaatccgagactaattcatccatgtTtggct  
acgattcatttatcatcctgtTccgactgatgaacagcaatctcctgtgcttctgctagatagggcaataatcgtccataaatatcataaattgatt  
ttcaggcatgcttcaattaattcagatcTTTgtTtctccagattgctgaacgaattcatcaaaactaaggtTtTgtgattcattgcataagcg  
gcctTgacggctccTaaatataagTgtcagTaaactTccaattgcaaaggatattcaaaacatacccaatagcgaagcattgctTgctcctTg  
ctTgagTcGataaacatcacaacccaaaattcactgatcattTgcagatggcttattTcgactagcaccacTacaacatatactcTTgaggg  
cgagatacatcggttagTaaagggTaatTctattTcggtatctaaaaattggctcTgactatagcagagcatcatcagggctTgtccat

gattctgatgattctgtcactggtccagtttaccatttcggatgtgaagcgccatgcaccgggtccaacagcggggataatcccgtaaaggat  
agtacagcccgatTTTTGATCTGGAAAAGAACGTGAATCCATTCGTTCTTAAGGGTGAATTCATTGAACAATCCCAAGAGCTTTGTCTGCACT  
TGGTATTTTCATTGATACTATCGGAACAGTTTCTAGCCAAACTGCCGTTCTTATAGCAAAGCATGACCATAAAATGCTAAACACTGGTAGTAA  
AATGTAGCCCAATAAGAGTAAAAGTATTTAGGATCATGTCCAAGACTAATAAAGCAAACATACATTTGTGACGATAGGATGACCAACATAT  
GATATTCAGGAGAACAACATAGTTGGAGGTAGCCATGAGAGCGGTGGTACTTGTGCCTAGCGACAAAAGAACATCTTTCCGGGTCGAACGG  
CAAGGAAAGTAGGGTGGCAGGATTGTCCGGGTGATTGGAATGATTTGGCAATGGGATGAAAAGCCGTACTTTTACTAAAGTAGCTTCCAATC  
GACCGAGCTGTTTTGACCGTTCAATTCACCGGATCCAGCTGATTGCTAAATCTGAGCCTTGAAAAGGACCAGCAACGTCACTCAAAAAGACGA  
GAGTCAAATGCTCATTGTATATCCATAAATCATACCACAAACATCGCTAATTTCAAAGGAGCTTCGCTTGCAAAAACAGACATGAGG  
AAGCTTGAAGCGACCAATTCGCTCGTTTTCTCATAGATATCTGGATGAATCGACGAAACCGCTTGATTGAGGACCGTGAATCTAAGATGC  
GCTTTGGAGCCGTCAGATCGCAAGTTTGTGAGGCCACCTACGACAGCTTCATTTCGACATTCAGAGAAGTAGTAGCATTTGCCAGTTTGT  
GTGAGCTGAATAAGATACTTTGAGTTGACTTTCAATGTAGAGTTTGTTCATGAACCAAGAGCTCGTCCGGTCCCTCAACAAAAAAC  
ACCAGCATGCTGTGACCGCTCCACAGATCCCTGAATCTGCTTACATCCATTATCTTGAAGTCTAGCACACAGTAAATCTATGGCATCCAAC  
CACATTGCCACTGGTCTACCCTCATGACCATGTTGTAGACCCCTTGTAGTGTATAAGAGGGAAAGTCTTTGTCAAATCCCAACCCT  
CTTGGACGATGTCAGCTTTGTTAATAGTAACGCCTTTAATTGTGTAGTGGAAAGATCTAATCCTAAAAACATTTGTA AACCTTACGTTGTCT  
TAGATCCAGAAAAGGATCTGGTACAAGAATCTCTAGGAAAGTCCGCTTAAATATATGAAAAAATCACCTCTGTGTCTTTTAAACCGT  
AAAATTCGAGATTCGTACAACGGTCTGTTGAAGAGCTTACATCAATCGTTTCTGTGTCACAAAATTTCTATAAATAATCTTTCATCATATAAC  
ATAACAGAAACGAGTTGAACAGGTACGCAATTTGCACGTTAATAACTCACGGTTATGAGAATAAATATCGAGTAGAAGTAATAATTACAAT  
GTAGGATTGTATACATAATTGGACTCTGTGACTCGTAGTAATGTCCAGGATATGATAACTAACTAAAAGTAGGTAGACGATCTTATTAGC  
CAGATCAGTCGAATCTTCAATCTGGAGATTCTGACTGTAGATTCATAGTTTGTATACCTCGCTGAGACTGTAACGTAATCTATCTTTGTATCTC  
AAAGTTTCTTTAGTGGTTCCCTTTGTAAATAGTTTCTTATTCTAAATATTGTTGTTTGTCTTTGTTTGTACCAATGTAATATCTCAACC  
TTTATTCTATGACGTTGTTAATATCGAAAAATTTTCTACGATGGCGTATTGTAATACTTATTATATAAGCAAGACACCTATCTGACAAAACAG  
TACGAAGTAGTAATTTCTAAAGTGCATAATTGGTCCCTCGTTAGCATTATAATAACAATCCGTTATAAGAAATGGAATAGTAGTAATATC  
AGTAATATCATAAGCTAAAGAATTGTCTTGATAATAAGTAAACAAAATTTGAAAATGCAAATTTCTTTGATTGCAAGAACTCCGATTA  
ATTTACAATCTTGATTATTGCTATTAATTAGAGAAGCCAGTCACTATGGCAAATATACAGAATAATATATATGTGTGTCGACAGTCGAAATCTT  
AGATCGGAAGATTGACTGATCAGGCTAAATAAGATTGACACTTAGCTTTTCATTAGTAAATCAGATCCCTGGACATATTACTATTACTCTACGT  
AGTACTAACACGTCGAATTCATAAACAATTTGTAATTGACTTATTACTCCACTCGATTACATTCATAACGTGTGAGATTTCTCCGTGACA  
TAAAGATAAAAAAGGAATAACAAGAAATAAATAATTTATAAACAGAAAAATAGAAGAATGGGTTGGCAATTGGAAGGGCCTTAAA  
TTGACTGCTTATTCTATGCAAAGAAGACTTACTTTTATCCATTTATAGATTCAAGTAAATTTATATGTCTATGTATCCTACTTTGAACTGCATA  
CACATGTGTTGACTCTGGTAGACTTCTGTAGATGATGAAATAATCTTATAGACCTCAAAGCTAGTCAACAAACGAATGGTAAGAAAAATGTA  
CAGAAATAAGAAACGTAGCTTCTATTATACGAACACTCTCCACTCTTCTAAGTAAGAAGGATTTCTATTTGGTACTCTTACTGAAACCTCT  
ATCATAAAAATATTGCAAAAAATATAATTAGGGCATAAATAAATAATTATAAGGAGCTTCCCTGCATACTCAAAAATTAATAAATAC  
CTAAATACCTATATACACTAGAGATCTTCTGTTCTTTTAGGCGCTTCTGTAATCTTCTGTAATCCAGGTACTCTTGATACGCATAACCCGG  
AAAATGTAGAATAATAACACAGCAAAGACATAAAAAAGACATAACCAATAAATATACAAAATACGCCAGCGATGGTCAAACCTTCA  
CTGAATGCTCAAAAATGGTCACTGTACGGTACCTACAATACTGACAATGCTCGTATCATTAGGGTCAATAAATACCGGCATTAGCACTT  
GCATGAAACTGTTCAAGTAGGATTGGCAAGTCTGCCCAGTGGAGGATCAAATATTCAGTCTTGTAGGTTGATCCACTGGAACATTGTGCA  
CAATCACTCAATAAACCTTCAATAATGTAGGTAAGGGTGTCAAAGCGTGCATCAATGCCAAAATTCATAAATTAGAAAGTGGTGCATGA  
CACCATAAACGTAATAAAAAGTGAACGCCAAACTGTCACGACAGATGCAAGTTGAGCATTGGACAGGCACTAGCAACAGCTTGACCGAA  
CGTGGAAATGATCATTGAAATATCATGTACATAACCAAGCATAACCTGTTCTGTCACTCGGATGTTCAAATGTTATAAACTTACAGGATA  
AACCAACATAAGAAAAATCTGACCGAATACAAATGAATGGAATTTCAACGAGAATCGCGGAATAACAAAAGAGATCCAACGTAAAT  
ATTGGATGGTTTTCTCACTTCAAACACATTTGAAAGTGCATGAATCTGGTTGTAAGCCATAAAGAGGAAGTCAAGCACGGTTGCCATG  
AAAAGTCAAAAAGCTGTTTGCATGTTTGTATAACCAAACTTGATTATAGAAAGTGAACCAATGAACAACCTGCGAAAATATTCAAGAG  
CATCTTAGACATAATAGCGAAGTCTCTCAATAAGAAATGAAAGTCTAGTCAACAAAATTAATTTGGAACATAAAGGCATAGCATATGT  
ATGAGTATCTTTTGTAGCTCCCTCTGAAATCGCTTTAGAATTTCAATCTATCCAATCTCAGTTGTATGTTCTTTCTCCGATTTATCCA  
ACTTATGCCAATCACGGTCACTCTCGAGTAGCACCGGCGCAATCACATCCAGAAATGACTCAGCTGGATTGGCATCCGGAGGGCAAGGAGT  
GGCTCATGATTAGCAAATAATCAAACAAGTCTGGAATGATCACCGATATACCAAAGTACACCGTCTCACCACTTTCTGAAGAAGCAATA  
ACCTGCAAAATGATCAAATAACACAGCACTAGGCTGATGAATCGTCAAAGAATTGCTGACCAGCATCAGCCAGCTTACGAGAACTGCAC  
AACCGACATGCCGATTGACTATCAGACCAGACGTGGGTTATCCAAAACAAAAGAAGAGCTGGCTGGCTGCCAATCAACGCCAATAGTA  
GCACGCTTACGTTGTCAACATCAATCCAGAACCAGGGGACCGATGATAGCTTCCGATAACTTTCAATTTCAATAATTAAGAACACTCTCAA



cggtgaatagtagcattgaaatcatgtacattaaccaagcataacctgttctgtcactcggatgtccaatgtttataaaactttacaggataa  
aaccaacataagaaaaaatcgtaccgaatacaaaatgaatggaatccaacaagaatcgcggaaatacaaaagagatccaactgtaaat  
attggatggttttctcacttcaaacacatttcaaggtcgatgaatgggtgtaaacattaataagaggaactgcaagcacggttgccatg  
aaaactgcaaaaagctgtttgcatggtttgagaacctaaacttgattatagaaagtgaaccaataataatcctcgcaaaaatattcaagaa  
catttagacattaacagcgaaggttctccaataagaatgaaagttcctagtcaacacaaatatttgaaccataaaggcatagcatatgt  
atgagtagcttttttaacctccttctgaattcgtttagaactttcaatcctatccaattcctcagttgatgtttcctttctccgagttattcaa  
acttcatgccaatcacggtcagtcttcgagtagcaccggcctaaccatccagaatgtattcagctggattggcatccggagggcaaggagt  
ggctcatgattagcaaaatattccaacaaagtcttgaatgatcaccgatcaccaaagtacaccgttaccaccttttgaagaagcaaca  
acctgtcaaattgggtcaaaataagacagaactaggttgatgaatcgtgcaaaaggattgcttgaccagcgtcagctcagccttacgcaaaactgaacg  
atcgacctgccgattgactatccagaccagcgtgggtcatcaaaaacaaagaagagctggctggccgcaactcaacgccaatagtag  
cacgcttagctgctcaacattcaatccagaaccagggaccgatgatagcttcggcataactttccatctccaataacttaaacactctcaac  
gtattcatactttcagaagaggaacagaggctggctggcgaagtgcagcactgaatgaagtgttctcgaacagtgctttcagaacgtgaa  
catctgttctgtagcgtatccggtacgctggaatgtagagcaagaggattaccgtaacaagcatattaccagtgacaacaccagatca  
acagctgagcaagcacgttcaaaagggtagtcttaccagcaccgactcaccattaaggcagtaagtttccaggctttacaaaaccattaac  
tccgctcaacaatcgtcgttttgcctttaacagtaatatcataactaagatttccagctgaaaatgtcagctcactttcaactaccaat  
cctttcacttctcaggatttgagcttcttaacaaccaccgccttgagtagcttggtgctttctaaatccaaagggtttcgccttctcaac  
annnnnnnnnnnnnnnnnnnnnnnnnnnnnnnnnnnnnnnnnnnnnnnnnnnnnnnnnnnnnnnnnnnnnnnnnnnnnnnnnnnnnn  
nnnnnnnnnnnnnnnnnnnnncacttcaacgtattcatactttcagaagaggaacagaggctggctggcgaagtgcagcactgaa  
ttgaagtgttctcgaacagtgctttcagaacgtgaacatctgttctgtagcgtatccggtacgacgctggaatgtagagcaagaggattacc  
gttaacaagcatattaccagtgacaacaccagatcaaacgctgagcaagcacgttcaaaagggtagtcttaccagcaccgactcaccatta  
aggcagtaagtttccaggctttacaaaaccattaactcgcctcaacaatcgtcgttttgcctttaacagtaatatcataactaagatttccag  
ctgaaaatgtcagctcactttcaactaccaaattcctttcacttctcaggatttgagcttcttaacaaccaccgccttgagtagcttg  
cctgtttctaaatccaaagggtttcgccttctcaacagcctttcacagtagcaggtgcataaccccgacnnnnnnnnnnnnnnnnnnnn  
nnnnnnnnnnnnnnnnnnnnnnnnnnnnnnnnnnnnnnnnnnnnnnnnnnnnnnnnnnnnnnnnnnnnnnnnnnnnnnnnnnnn  
nnaccagatcaaacgctgagcaagcacgttcaaaagggtagtcttaccagcaccgactcaccattaaggcagtaagtttccaggctttac  
aaaaccattaactcgcctcaacaatcgtcgttttgcctttaacagtaatatcataactaagatttccagctgaaaatgtcagctcactttca  
tactaccaaattcctttcacttctcaggatttgagcttcttaacaaccaccgccttgagtagcttggtcctgtttctaaatccaaagggtttc  
gccttctcaacagccttttcaagtagcaggtgcataaccccgacggaaatgaggaattacctttagcatcattaaattcaaaagtctcgtg  
gcaacaacattcaaaaaatcaagaaagcgtaaaagccaatgataattgcaaagtttccatattgacgtgtctgtaattaaagctggcaaa  
cagataactgaaccgtcaacagaggttgaccaggtgggaccgacaacagggcagactttatactgagaggaacgttatcatagttacctc  
ccgaaggaatcatttagcgcattcaaaagctgagccttgaactcgttaacattaaagactcaaaacaaactgtacaggatctaaatagaa  
atccaacggaaccaccaaccaacatcaatattgggaatagcataaccagtagatggcaatagccaagacaccaataccaccaaaagcaga  
agcggcggatagcttagcatgattgacgcaacgctcgtgaaaaagtagtattgtaagggcggccataagcaaaaagacgtaaaatgtcca  
aaaaccaccggcagtagcgaagttagtaaaaataagaataatggagaaaaacagtaacattgataaacgaaaaggaatatcaacga  
taaggctactaatgacatcgccgctggatgtaaaagagcgggaagaacggtccttagcaataataggacgttgagcaacatattggcaattc  
ggaaaagacttgaaggccgtaaataatagcaaaagaaagtacaccacctcgggaaaacatatcactgtatttcttcatattgtaaaga  
tagaacctatgataaatgactgaaacataaaagcaaaagccatggctcaatataagcaggatcattaatgaatcgttgccacgaacgaattaa  
acagtagcgtagtgcataaaaagttagtagtgaaggagacttctggataaactcttattttcagaacgagcactttcagatacaattca  
tgttcgtggcagcggacatactgtcatcgaattccttgcagagtagtagcggacgaaggagagcttccatccatttctgtcatattcatccat  
ttcacgagaagctgggaatacaaggatgctcatgccatacacgttcaagcttccagcagtagtgaacacggcttcccaacctccttgg  
tttacgagctgtgggatcgagtagcggtcaaaaaatcgggagtggtttcacggggatggcaagtgaagccatatacaaaaagtagctccta  
gccttggagccaggccatagtaaatgtgacgaccagaataaaggacacaaactcgatcaaaaagctcataaattttgactagcttgataggc  
ggaacaaaggaagtacctgaagttcctcagcaaaatacgaaggttatttcaagatcgtgaagcggtagctgaatccaaaccacgggtactat  
tatccagcaggcgatggttggtcgaagagcaaaaggcctcactgatggttacagtttgcgttcacctcggatacaccacgaacgaaatcgta  
ccaacctcgatttgaatgtagtgaagacaaaactgttagcaatgagatcgggactcgggccatgtattcgtcgtgagaggttgaaggaa  
cgattacggggagcacgcacacgggcagaaagtaattggtttcacgggtagttagtgggaaagtggacatcgtttcaccggaataaagaa  
catcacctgggtaatgtttttcatttcgacggcatcaatgccgtcataatgaagagaaccttctacaccattatagttctgtctcctcagctactg  
atctcaagtagtagaacaaccggtcctcggttgaccaaaaacctgacaagctcaccagcattggcgaggggcatggctatgagaagaggatgg

ccttttgacgacttgcctcttgaagtgcgtaaggagcaagaaagatgcaatgaaggtagtgagaactcgtaaccagagcccaacca  
tagatactggtatcacgcatacaaacaccagttgtacgagatcgaatgccatcgcatcgagggtatctttatagccacgaaggtagcgtcttag  
atcaaaatcctcacctaaagcgaaggatcacggtaaggatccacggacgaaacagaagaggaagaagtaggagcatcagcatgggga  
atataagaaccggactcatggtttgactagcgcgcatctctggctgcaacggtagcagtgaggagatagaagagacgtcctcattttatctgc  
gcagtatcgtacgaatcaggatgaaacgattggaattgttatccacgaagcagcagatgcgtaagaggattcagagggagctggggtatgat  
gagcggcggaagacatgatgacaatgaaaagaaagtaaaaggaattcagtagctcttacaatttagtagaatgaataggctatcaaaaga  
aataagcaatcagcagttaaagaaaaaaaaaactgcgaaaccctgtaagataccctttttactagtttaaatagtccaatcaaaaa  
gaaaagattcaaaatataataactaatgaccgtaaaacaaactaatataaacgactaaaaaaggaaagatgaattaactgttaactttgcc  
aattgtcgtatttcaacaatgtcgcctgaaaagagcaattgttccgaaagtaagcaagacaaagaaaaagaattataaactaaacggg  
aaaggataagaaccgttcagcgacctcactgaaaaggactcctgcaggccttataagtaataaattgtcgggttttaacatccgcaatgat  
atcaccgagtgaaagcacaatcccaaacaccgagatggaaattttcagtagcggaggaatactttgatagcccgaacaagcatgattcg  
gagactagaagaattgcgcgactttgttcgttgagcgaaaaaataaacctttgaaactctgttttgccacttctctttgtcttttaactataa  
aaattgtctgtaaacacatgggtgctttttttttttttattcattttgtcgttgctgttctctctcctactgagtttaacagaggctaaagcttc  
tttgaactgtcatttaccgctgcgtaaatgacggagataacaacgaggagaatggaagagaaaaaagtaggcagggaaaaaaataaa  
cgatcaagctgtcgacaaaggaataaaaaggagaatgaaaagctataaataagaatttctgaaaggaatttgaataggatcatttgagttcc  
aaattgtctttttttgttacttctctctcgttcttgacagctgcacccgaaacacctttgctaaacacctcggctcggggtatcgacaagaa  
atgaaaaccactgaaagtagcagaactatctcattagtccttgcgaaaagagatatgtcctttaattgattgtttacaaggaaagtttaa  
accatttcatggtatattaccatacggattgttacaatatgaattccgaagaatccaaacccataactgacgaatgttcaatctttgtttctgtt  
gtttcttctggaaaaataatcttattttctctctctctctctctctaccttattccttatgacttcttctctctgttactttcggttcgaa  
agactgtattctaactcaagaaccttttaaaatgaacgaaaaattgcgctattacatgattaataaaccaacatgggaagtaataatgaa  
gactaaaaaaaaaaaaaaaaatagagatatataatgcaattaaaaacaattagttgatcattatgtatactgatatatttctcaataaattacattgc  
gtctctctatcgtcttaacatactggcttcttcttaacctttttatgaatctctctcgaattcttattcacttctcaacgttcgctcctccg  
tcaacgccattttgctcagtcacctttttttgtgtttcactcgtttttttattgtttgcccattttcggctgtttatacaatttcttcaaggaaa  
actttctgtttatttctatctctattttgtttgtttctcctcgtttcttcttgcgctctcgtttctttgattcaccgacgttgcacatctctt  
tattcatacaaatgtttctttcttgcacatctttctttttctgtttttatgcttctctctctctctctctctctctctctctctctctctct  
cttctactctttctgttgcgtggtttattctttctttgtgttctttctctcttttagtctttttttctgtttggctggtatcctagttgcatt  
gattccctttccgctatgtcctcctctctcctaaccggaggccttatgcccttcggcgatcacaagttctatgaatcttaacaggaacctttt  
ccctccttcaactcactaatgtcttccatttactctcctaactcctacggctgcctcttcttccaccgctagaccatctctcactcttc  
tccgtttctatcttccaaacacctctaccatgaaacgttcctaactcctcctctacagtttctctttgccaaaactgctgttctcagttt  
ccgactcttactacctgtctactctactcctctctttctcctctcctcaagtttccggaagtgctccaaacgcacactctttt  
cctctccctcgcaaaaggtgctcctcctcctcctcctctcctctcctctcctcctctcctctctctctctttttatcacctatcg  
cactccctacactcctgcacaaaaactcgaaaaaggatccttttcatcaatcaagcatcctccaatgtcgcctcctctcgcccttcttctt  
ttccctttgctacttcttccctcagttcgtttacttccacacccggtgctactgtcgcgctcctcctcctccccgtttccatctactcccagc  
accttccctcatcttctcctcctccttttttcccttctcactgttttacttctcctcaaaagtctcctcaccgtttctctttcgcccagttcg  
tcttcagcaacacattctcctcgtctcctgcccactccaaacgtccaaccctcgttcttcttctttctgtttggtaattcgaatcctgcgcctac  
tccctttctcctaaacataatgattctcctaatttcacaatcaatctcgtgattcatctcacatactgattcattcatctttaaattcacttc  
gaccctttccaatcgactctccaaatccaaatcctagtacataatcttttactaccctttcaacaagtaaaacttctcctcaggttttctg  
agtacgggtttgcttccaacaaagtaggcctcgaaaacctttaatctctactcctttaccccaagcacacctcaaaaccttctctattttc  
cgcctaacaattaattcagccgactcctcctcctcctctacacttcaacagcaactctgcgcttttttctacaaggacaaagcacacctac  
gcatcaaaagcttttcttccgcaaaactgggtaaatcatctatggatgtttgagattgaaacctcctcgtctactgtaaaacaaccgctgattc  
ccaattaattgatcttactcctactcgtaatccgtttgatgtttgagaactctcaatgtgtttggacgacattcattcatctgctcaacaccgcaat  
aactgtgaaatattagccgaaatggaagaggaatctgcaattttgggaaacccatccattgcaaaactcaaatcttctctctgctcttacctc  
aaagtccctgagtcgctgcggatgacttacataaccggttccgaaacattcttgcgtgggagaggtagtttagcgaggcttccaagttgaa  
gatcctttggagcgtatctaaagatgcggtgaaagaagttaaaggtaagatagtgacccaaagagaggaatcgttgttgcacaggtttct  
gttcaaaagagcgttaaaggacacgatcatatcgttgatgtaatagactctgggaattaatgggatcttttatgcaagtcagttatgtgaga  
atggtagtctgatagattttggaagagcaaggtcaactttctcgattagatgaatttcgagtttggagattctgtagaattggcttaggactg  
cagtatatccatcataaaatgttctactggatttgaacctgcaatgtcatgataacgttgaaggacataaaatgggtactttggaat  
ggcaagcgtatggccagttccaagaggtatggaacgagagggagactgtgaatacattgtcctgaaattttgccaacctatgtacgacaagc





catcttcattctttcgtttactagttttatTTTTTTTTTTTTTaaagaaaattccatgatataaaggccttcgtccccttgccattttattcttactct  
gctatgatgtatttcgctccattcctgtttttttccttacacttttaaaatgaagctgattcacaataatgtagaaaaacagggtctggagaat  
acaatgtatccagaagagcctgaagacatgtggtatgcttttaactgttcttactttgctagattttgcatagtaacattttaggcacctttacaat  
atactccaaattggcgaccagctgaaggctccacgattcggtaagcatgtttgaaagttcataaaaattggctaataattccgttttagtcggtt  
gtcaaggttgagccacgggtaccacttctaattcaagagaaaaatgaccttgaaagtttggtagaagctacagactttgatacaaaagccgc  
tgaattacatatcaaagggaaaacaaccgaataccaccactcgttaaggatgggttcatatcacacactggatttggagttacatcgaatttta  
cactttacaaaaatgaatgggactcgttcgcttttagatcgagtggatgctgcctgtaatccatcaaggaatgcagaaatggggcagtggttctcg  
aggaaggtatattctctcgttcacggatttattatctgtttgctacagaaatacacaaccaagttataggtctcgcaaatattgtttaataac  
tgattatgactattatgccaacgaatcaactattccccgaaaacgcagaggggatagcagcgttatcagaaggtatgcatatgaa  
gtgaagaatgctgtactctcactaaactctcagggtttaacaaatTTTatgatactgttttcaagcaatttctacagagcttgattttgacaa  
actaaagtcgttatcctagcctctcgtgtttgctgcaaaaagtttattcgattatattggaaatggcagtaaaatggacctaaaacacattt  
tcaaggcgaacaaaagttttgattcttccagactggccatatacattctcttaacgaagtacttaaaaattcaattgttgagctaaagctg  
gcagatacaaaatacattcaggaatccgcatgctaaacaaatTTTccaagttatgaatgatgatgacagacgagcttggtacggccaaaac  
atgctgaaaaggccttgaatttgggtctattggtaactttgattagcgtatttttccgaagctctgatattgctactagaaagaaatgggtt  
ggcctcgtagatgcttaagagaaccagtagtaccatatacatttttagcagcttcatgaatccgggaacaacttgatttactctccggaata  
gctgctatcttaacatatcctgtggaagaagaagatatagaggaagaagaagaagcagaagaataaagctaacgaaaaacaaccaca  
aaaaactcattcttactttatgattttcaatgtaaaggggtgagtcgaggattttagagtaattctgagctgggtcagtgtaatacaaatata  
ttctttcgtatctaattaattcatttttcaaaaacccttaaagcatgccatccagtttaagtgaatcaatacactcttaaaatacaagccaaa  
ctcatagcaaaagtctatgacgaagtacacggccatctccagtgatactactataaaaagacccttctttcgttcaaatTTTTtactagttgctcag  
ctgtattttttcttaacgcgaaccaaataaggttacaaagctttccatctcagaagctgctggaacagtcaaagcttctctccagccatctat  
attcaaagctttacataaacgaacgtttaaagaagcttaccgttaccatcaacgcgtgcaagaagtctggcggcattagtagttctatcaacat  
ttaatttaagggccgagaccaatgtctgtataagactttgtagtctattaagagataaagttggcctcgtttcgaaaactgtcttcattc  
tcttcacctgaccttactaatcgctaaagaactgtcctgccttctcaattTTTTtactcttctttgcatcctcaacgggtctcagattgctgttctt  
cctcattcttttatcggaacctgcttctgttttactagcgggagatttagctgcaaaagagaatggattaggatttagtaccgaaagagaagc  
caatcgtatgacgcgtaggaggtcacttcaggagttggagtggcttttagctgataaagggttgtaaagtaaaacttttctcaggagcttc  
aaatataagcttctgctgggatccatgaaaaatgaatcccttctctcagcatcctcctcctttgtttcgggtgctaaatagtgcttggtctc  
tttctgttcttctgtgaagcttttggaggaaaatgtgggagtgaagaaggttttgacaaaagaaaagggttcttggtctgagcttctg  
atccaaaaggtaatttttcttcatccggttactgatttcttattgaaggcagctaaaggacctgtaggagtaagtgaagaagggtgaaactg  
aaaagattgctaagatcaggagcggagaatccaaaacgtggagcactgggacaggtaaagtagattcggatggttagtagaagtagtttca  
gagggtcacttcattatccttaggactctgctagaatccatttgagaagattttacagattccgctctgaagatggctttacagcttcattttgt  
agtttatctttgctgcagaagatactgagctctcaatggaaaaagatgcttttgtattcttccattaaaacagaagatttccgaatggatcatt  
ttctaaactTTTTgtacgctacccaaaaatgctttgttaacctcgtttctttaaataatgtgtcatattgtctgtcgaggaagcaacattgtcggtt  
ttccaaatgtaaagggagaggcaacagatttagcagcctcgttttgcaatcctgaaaaagcccagcctgctgagacattccagcaggtcgt  
ttcctgttttaggttagcaattctaaactgttagcttcgacagcacttcattcatcattattttcactttctagaggcaatgacatcggcagatg  
cttcggtcgtagttcaacagaaccactgcgatcatcatcagattcatcctgatcctttgtaatttgatgatcagaccgcgttctgacattttaca  
tttggcaaggtcaaactcccgtttgggtgaacacactcatataacgataaacgaagtctcactattttggaaggaggattattagaaaataaa  
gaaaggatatttttaggtatcaatttaatagaaaatgaaatagtctaagttacaaaatTTTactctcgtagacaaaacgatgtatttatg  
gggacatgacgctgttgaacgttggcactattctccttctgaaactgtatgatccaacatctcaagcacttttcaactcgcaggttgcatccta  
atttgaactttccgagatttagtgccgagttctgcagagtcacaaggaggaatttttgagtactagtaatgtccagtgatgcaaacgga  
cgctagaagcacccaaatcaacgatagatcattccatatttctcagaacattctgcaatccttgattatcaacccaattatggtctctgttcc  
aatggacttcaatacattgctgattccttctgttagcaacaaatTTTaaacgaatactttatcttttagcaataattgatgctcctccaataaaga  
ttctttatctgttgacgaatttctgtaaacttgaagcaaaaagtctgtaccagcatgaaaaggcgtagaatacgaaggctgtaaagccttggg  
aaagctctccatacctttgagacaacagtggtacgataggggacattgaccacaaaagggttagcagaattttatagtgtagtttgagcact  
tcgcctagaaagactgtttggggcatctgagtacaaccgatcttgattgaatcaaaaataggttgaagaagaaaactgttcatatattgaaaat  
actttgaacaaccttattgaaagcaggaggttgaattcttcttgacttcattctgaaattcactgttttgcacaacgctaattgatcaacagat  
gaagtcgattataaacaactcgtctgcaaaagaaaaatcggcagattccccagcagaatcgacatgtaagctccatttttttagcattccc  
caactgggttagtaagttgggtccgagatttatgtcgttagtactatcacaactgccaacccatagctcaacaaatctatgccgtacaactgctt  
tttaggtaataatttttccatccaaaatacttctgggtccgtaacatttctaaagactggattgttcttcttttcaaaagacaaaacat

gagtaaataaagactgaaaagggtattctttatgccagtaactgcaagataaatcagaataagagactgaaaccaacctctatgttgatcactt  
ccctcaaggcataaatctataagaggtttatctttacgaaatggtagttagtaaaacctcccggaaatcaaaaccaacatcaagagttctttc  
ccacgaacataatctttatctgaattccggaggaaccaatcaatattttcatcttcgttgaccaggcatcaactcctttactttcatctgtcta  
tgatataagaaatacttctgaagtaagtaagattttccggaagctttctcataaagtacaggaatcggaagacccaagaacgtgtcttgaaa  
tacaccattcaggacgactgttcagaaacccggaaagccgtgactttccagttagggaatcatttaaccgattgaagagcttcaatcgctttat  
cttaacagcttccaagaaataaaccattgagcagttgctctcaaaattaaaggcttcgatttcgccagtcataatggataacgggtttataagg  
agctagctgaactacatgccattggcttcataagctcaagaacctgtttcctccttcatttaacacatttaaaccaaaataaggatccaccaga  
gcatctttgtgtatacgccattatcgctgacgggagaaaaagggggaagagaatgttccaaacctagtagataatcatcattccgtgtccgga  
gcaacatgtacaatgccagtagggtatcagatacatattcggcaggtagaaatggaaacactttccgggaatcaaaggatttgatagtg  
gagtgatcgaatagatcataggtacatgtttcaattttctcaaaactttctagaataggcaatgaattaccaagctcttgctacaatatacttct  
gttcaccattagaaaagattccatactcactcctggatgaaaggcaagtccaaattggaaggtagcagtcacgggtgtagtgcgaatataa  
gcctttacattttcatatggtttcctccaccgtaaaattattcactggaaatgagaagtaagcgaaaaactaacatgattatcattatattcaat  
ttcagactcagcaagggcagaacgactggatggactccagatacaggcttagctgtcgaaaaaccattttcttctaccaatgtttgaaaaac  
ttgtaattctgaaatttgaaactcatggctcatagtcgtatattctggaaaaccagctcccataactgccaacgacgaaagagggtcatctgacc  
attcatggcattttctgcaaacctttggcgtttttcgtatctgacatggggatccttctttatcattttgtgtaccgcttcaattcaataggaagcc  
catgacaatccatccgggaacatactgattgatagccatttagcagttccagcagattcacgatacttttaaaattttatcaatgatgaccg  
atatgtaactttcattcgctgaaggaggctcgtctaaaagaacgaaagattttgaagaggggaggttcttcttctgcatgagataaatcatca  
gttattttctcatatacttctcattttcagttcatcatttcaataggaaattgttttggtaaaacaaagcgaattggagtagtttcttagcatt  
cgctgttgactaagaaaacggagtcgaattttcgggttactagccgattttctatatagcccttcaataattatatttcaaattagcatgtgtg  
tgcgctactgttatagaacaataggatccatccaaatattgtgtagaagagatacaagcttaagactgaaaacctgtgtctattatccttctt  
accacatcaagataagaaactattcattcagttattttagttttgtttcttgatacccttaactcaaaacaaagtagaagtagttctattgctgaa  
tattcaaaagatagaaactagcatgaagccttcaagtctaaattccaaaaactacaagtatagtccttaaaagagattgctatcagtgattatt  
agcaggttcttcaaagggtcgtatattcctttgatcgtgaaactagtagccaggttcaaaaaaaaaaaaaaaaaaagaaccttatctata  
ggctaagaaataatagataaataactcaaaaactttttattagaagaaaaaccttaacaactcatgactctgttcgccgttgatcagcctt  
cggcagcgtccatgtcaacatgaattctttcttttcaaaagccgaagaatttcattatgagaaacgtaaatggctttacgaccgctggaattg  
actgccaagacgcaaatattccaagtaggctgattgagctgttcagaagaatcaaaagtaaatcactctatgatcatctttccatgtgattatc  
atggattctacaggaaaatattgcgtaaaagagattccgtcagataataagcatgtacttgcaaaatgtacgctgtagatgtcccacagcagca  
tagtgagggttttaatacttcgacctcatctttaccaggcattgatgacatgaaaactctgtctatgattcaaggttagaaattcagcagattttct  
gtgtcagaatgcagtgctggttaaagggtgagtgatgagtgtaaatagcagcatcaagataaactaaattatggcataaacgaaaatatacca  
agatgttataattttatatacaaaaactttaagccactgctgtaggctcagtaaaagcatatgctagaatattgtttgtaggattccaagcaag  
ctgttcaaaggaccgttcgctggttcttcaaaattgttcaccagtaagagatccgctaacttagcaaaaaataaataattttgtccttaca  
atatcgatataacgatcttcagatccacttgcaaaaagcggctatcaaaactgaacccaagaacggataggatctaatagaatttagtaa  
atactgttcttttaaatccttacgttgatcttgtaatggaactttggcatatccattcatcggtatcccataatgtaacgatcgcacggctccg  
aacagctatgcgctgattgtcaggactaatgtctatacaataacaatttgacgtatgagctttgatttcatatactcgttgagagatggcattca  
atgacttgacagtgctaaaccggtagtcagaaaaacaagcttactaaaggaccagcagcattcattgtctttgataattagcttagtaaa  
aagatagaatataaatactcacaaggtgctggaatgtctgcataatttgccattccttagcatcaatgaaggaaagcatatcatctatgtttc  
ttagtagccaaagacaaaagaagcattttttaccgactccaacgagcaatatcgcccgaaggactccaactaccgtagatgtttgtt  
aatcactctgaatttcgcaatgggttagcacttagcaaacgttagcaaaagaaccaatatacaagaggatacactctgataatcccaaaa  
gcgaatcgtttttccagagtacacggcttaaatcgatcagaatgagttggatccataactctgttctactaatcactgctacgtgatccaatt  
ccgttgaaaactaaagtctaaacgatccaggttcaaaatacgaaccgtgctatcattggaagaggttgcgagacggtgacctgaaacattccat  
cctaacgaccgaactgaaccttggtagcatgtaggtcgaggttcttagttctgaaaagttggctaaatcaaatcatgtcagctaaatgaaa  
aaagagaaagtttcttaactggctctataattgaggagctcatagaagacaagctatgaaccgctggtcgtgacaagcgtatagtagcac  
tcttaaagtaaatgttgaactacatacacttagaaaccagcagcatacaactgttctcaatgtgaattaagaaatcaattgaaaatata  
attcaaaaagataagatataatgatctatgaaggtgattgaattgttcagtagactcatgaccattctgaaagcagtaggagaatccaaagg  
atttatagataattcttttaaacatggatggtctaatgcttctttcagaatccgcttctcggggtctagttgaaacatttgcgtgatcaggtc  
gattccttctggtgatatttctttccagtagtgagacatagggaatctgccttattaataagtttgatggattcttctgatttggctgctgcaa  
aggtatagttcggttaacttagtaaggtattagcatctcgggaagcaaggatcacatagatagatcttagaaaagaaagatttatatacat  
acgtaacatataaaacacatccaagactccaaatgtctactttgtgtcataccacctcaggaggagcagcttagattgcaatatttccgggg

ccaagtaaccatagttccgcaaacgtttcaagaatgtgcctctgcatgaataactttagctaaacaaaatcagaaagtttcaaatgaaag  
tctttggaatcagaatatttcaacatgcatgtagctctatactttgaaggcatatgaaactgttaatactctggttgatctctgtgca  
ataccacattcatgtaataaataagcgttttaagatttcttcaataaagggttacagtctgttcatctattgaaccgtttgcaattagaaagcc  
ataagatccccctctccacatattccatgacaataatagctcttgcctggtttcaaaaactcccacattgcaacaacaccaggctagaaactat  
tagcattataaaaactttgaagcaaacgtcgaatactcataggtgtaatgtttcaaaaattcaatttctgtgaaacattcggtagcacggtt  
tttcggaactggtagtaggatttttctgttgataactttgatcgcatagcattcgcctctctaaatcaactgccagcttaaccacgcaaag  
gtgcctgtgccagggtacgaagaactcgtatctattacgttcgaagtaaccagttcttctcactctctgaacggttgtaaggaattgaca  
taaaaactcctgcaagtgcatgcatataactggtttcccatggtaaagcataatctatctacacacataatattcttttcttaccga  
atctcatcttttggtactcctaaccacccgaatctcatcccatgcaaaaatactgcaacattttcggtaaccttctggtatgatgtagt  
aaaaagcttaattataatcattcgttaccacaaattcaaaaatgtgcccgttagaagaatgatctttatagactgttagaacataaaagagcaa  
tctgttccattcaagtccttaccgtgtgaaatataacgttattcgggtttcagtttactagcatgaccctacctgttttagcattgaacgca  
acacatacgaactgacccaatctcactcgtaaattcaaaagtgaattgtctaatcttaggacctctataacaactcacaggaacgggtg  
cgacaaaatctcagaagcattgtgaatatctcgcgtaagaggtaactgtgtttccgctgcccattcgagtcattaccaacttaataga  
cattttcagttgtgtgccaattcagagggttgcggactcattcacgggagtcactgtgtgtagcctgctgtagcatcatctacattgtgt  
acagaaggaaactttactaactcaaaaatcctcactttaaattgcaaaaaaacaaaaattacaatgcaagaatgttcagaatctcctgatg  
atgatatgatttttcaactggatgtcaaagatgaacctgggtcgaactgaccacatattgagatttactatagagaactcctgttgcaaac  
ttatatacgaataaggcatcctttaaagtgtctaatatcacttaactgcttccacaaccagcgatgttattaagtacaagaaagtagatt  
ttcctatattcaagatcctttttctcattgttatatattagtttcttttcaaacgaactgtgttcgttagttgattgattataatcttgcgaa  
ctgcaaacctttaaagagtagaattcagattgtaacactcattgcttttcatagtaaaaatcgttgcctttatgttaattataggattgacagga  
tccattgctactggaatgataaaattgactcaaaaaattataataggagtggttagggaagacaacggttccaagcagtttcatgagaa  
ataccatgttccggaattgacgctgatatcttgcagaaaagctgttgagccgggtacgaaatgtctacggcaaatcgaagaaattggcca  
acaggttattctcctgacggtagactgaatcgactgaactaggcaagattttttgagactcctcaaacgtaaacctttgaattcattgttc  
atcctgcccgttaggaaggcattgtaaaagacatactttattattacataactggccatggcatggtcactcgcattcactattgtttgagcc  
aaaatgcacactatattggaaccatttgcgttgcctctacgacagaaatacaaaaacagcgattgttgaagcgaatcctgaatattctct  
gaagacgcccagcggcattcaatctcaaacaccctcaagacaaggagaccctgtgactttgtcattgataataactcagatttcaactct  
ctttctcaaaaattatgcaaccttgtttaaattgcaaccttctcctatgtggaccctaagctgccttataataactgccttgcaactcttatgaa  
ttctattattatcgccaaatgcaaaaggcaacgaaccagaagaaatccatttaaccaataacatagaccaaaccaactcgcacta  
agaattcaactccctaaactgggttgtttctagtgcgagcagcgtgactgtataggacattaggcgtaaataaaatattgatgcagcttccat  
ctgtatggagaactgttagacagtaagaatgatacagctaaaaaatgattacctagatttcaaatcttttaagctcattttgatattctttt  
ttttattcattagctctcttttatatttaaaggcataaacgatgtttatattctgtctctaaaggcatacatctctccctaccctttccaacc  
aattagtagacggtcttatccagccaaatgttgcaaaaatggatgcttctacgattgatttagatgctggctcgtctcattttataattgatacta  
atttctcagaaatccggaattggggaaaattctcattgagcatcctgctcatgtggaaaaagttctcacactttagagttggataattcggctct  
acggtagattgatgcaattcaaacagccatataaaagcaactgtatcgaattatccttaattcctctacatactctcaaccttgagagcaa  
tggcctcatggaacaatgggggtgctgttagtcgagttttcaagcctttgactggagtagtaaaagtttacgaagattgcaactttcaatcaa  
atgaactctcaaacgaaacgtcaaacgtatgcgttttgcgtctcaagaaacgttctcttctcctgtaattacattgattcagacggt  
actcaagagggtgcgacggagctcatcaacacaaaaataactactccttatttaaaggaatctgtaacgatgaaccgattgttttgaaga  
tctttacagactggcttacatacataatcttagatcgaatgtgaatagagctacaaaaatttctattttaaagtggtccttgaactgcattct  
aagtctatattcgcgagaagaagaatcaatgggggtccttgtacgagctgttcacaaaatttttctcgggctgcaactgttctggagaaggtc  
ttgtttttctcaatgggatggcagctcctctgaaattgaagtaataagagcgtttataaccggttctccagctccttctgcttactacatat  
ataccgatcctttgcagcgggagctttgtttaaataattgagtgatgctcctgatatactgcctccttttgaaagaaatagcttgaatactg  
aggcgacactaagctcctcaatggattgcttcaactccttcaaaccttttcaaacatggactgctgaacctttttctcctgaaaccaagt  
ccactccttattcatagattgttgagaatgtttaccggcatgctttcaaacctttaaattgtgaaagcttgaatagttcagataaactgtctg  
ctacctaggctgaatactttattatggccttcaagagataaaagcagttttggcactattgacaaatctgaattaagttctgaacgaaaaatc  
tcgttaactgcattaactgatgttatctcaatcgccttctgatgcaattattcattcagctttacacgacaagtaagcaagaactgttgac  
agatgctgttgcgaaagttattctataattttatctttttccagaaactgcttgaactcaaaatcagcagcaatgttttctgggctgacttct  
catcttttctatcgcctcttctcccgttctcacttacagagcattgttcaaatcctacagtttctacctgatattaagtggtttgagctgtccaat  
tccccgtttatttctgacttcttttacctaaaggtctgagtagctcagttgaaggatgctgtctgtaaagttctggaagatgcttagccgaaact  
gatattgtctgcatgctttagtatctccattatacctatgttacaagctttggaagctatacctggtgaacatgttgactctgtcctccagtagc

ccaatgcatgcataaaccggtgtacatctcgtgttatgcatatttagatgcatccataagctattgcaaggaatcactgttagattatcaagatgg  
aatggccccgcttttccgatttcgatagtgctgttgagcaggtaccatttctcctgaaagacacctcggttagtcaagatgctaagttatgta  
tttaagttggattttcaaactcctaatttttccgctgctgtggtgagtccttcgaatgcctctcgaattatttaaaggattaattagttatggct  
gactatgactttgctgcaagccataccaatgcttttagcacaacccatcgagaagttggcaggggaataaggaattggaagagtcattacaaat  
agacttgcatacatcgttttggactaacgaggattcattttgaaaaatcgtttcgactcagtttctattcagccaaggttctcttttatttt  
ctattctgtaaagaaacttctattttgtgatcaacggtaaacagacatgaagccttctcggattacttccagaaaatgtacaattattttgg  
attagtggtgatcattatacttaaatctgaaaaatatttttctagtctgtaaaacttacaagtttctgatgcatcctgattacactgaattaa  
tttgcatgaccgatcttctttatgtaaccgatcgcttaataactgaaggctacattagcaaattctccttcaagaaacgaaagatctattcaatc  
atccacgagaagacgatctatggaaaatgcctctcctgtaagtatatggagctgtggtctcacgatcaaattggcagtgctgccaactatcg  
acttgttcatccaagacacactctgttctcaactcaactgctgagcattcaccagtgctgcaagatattagttatgtatcgacatgtaaa  
caagaattgtctgagcaaaactttgaggtgctgctcaaaaattcttgacgcaattcacggaattatcgatatctttaaagtaacataattggcagtt  
gaaggaacgttttagtgaagcttgcataaaaggctcagagacattagaatctgtattacttgagggttgtagcatataagagtaaatattat  
atgctcttataaacacgctacatctgaaattcgtctaggttatggaagctttcttcttaacagagcgtcggtagtcaactctgtaagaatata  
tcgggttatatagcgttttggctcagaaaagttgataccaatcatgttctttgaacgaagttgaagaatggtgtagctttatcctcgaatgaatag  
agaatacattcctaataattatcgatccttgcatttgcctatggttctggtggcaggggaaacccctcttgattgacgaaactatgtcta  
agctatcgaggattacctaccgatgaaattttgaactcttgagaattattacttcaaagaacgaagctcttcatcaaaagtcgccaacgtatg  
ctctgatattttattgttgaactcgtgtctttcaagtaatgatggattggacaagaatgtgtcttctttgttatttgggtttatttgggtga  
caattcagaaagtgtaaaaacgtaattagcaaacagttatagcaacttttggaaactcaactcaagacatctcagtgtaagtcaatttggga  
attcaatctaaagcttgttttctgtacaaacaggacaatgcaattcctcaagattttgcaaatgatattggcagatgagggaaccccttgggt  
tggaggattcttcaatgacaataagtcacttattgctgctaccatttgaagcttacgataatgggcaataactactcattatcgattatggatcag  
attattcgttattcaaggtcgatacactccatgactcaatcctctcgcgagcttctcgcataatggaagaaagacttaacgttagcatcgcca  
gtcgttacaaggttgggttatcacgaatgatgaggacgtaataacaatgtctataaaggatagatctcggtttagagccacgagtggttgg  
aaagtattcatcattatccttcagattatctcgattcaactggaatcgttacaataattggaaatgcaaaaactttgaaagcatcagaatt  
gaatggaatgaaaaattatcatccacttttgcattgggtgttgggagcattatatacaaaatccacaagctctcaatgcaagttatatt  
gcagcaacacttttggattaatattaatgggtcttactgcataatgaacagttacgagctgtagtttcttctcattcagcatttcttttggga  
ttagaagatcaaaagctcgtgaaaggcacctcgttaagctagtagtctcaagtgtagttatgttcttctcaagtcagagattaagcaca  
taatggcgaattttatgctcagagattatgataattatcggccatccatcacatgttttaggtatcaatcgggtttttgcaagacaacac  
attgatactcggatattcctatgtttatgaattattataccttctcggattacacaaagtgcttttctgggtattgtcattgttactggcaggt  
acagaaaggtgaagatctaaagctataccttctcgtcatgtattcgaacaatatctacattgtatgaatcttgtgtggtgaataaagagatag  
agaagccatttcgaaaatcctttaagggtagaggcattaggtgctggtggtatcttaaaaagcataatgctgtgactccttactgcagttact  
ccgcagaatgaaaatagctacaatcgaaatcactaaacatagcagaagcctaaaaaggaaaggaaaaatctaagtcgtttgttatgggaat  
ccggttacgtacaataatagaactgaaaaaaatttgccttactcaataaaagaataaaaggataggaaggattattatagaactacaac  
gtggataaaattcatgaaacatagagaaatcgtttggaagaaactagtgtagcgttaattctatcattataaaagtaacaataaggccaa  
aaggaagacaggggaagttgagagaaggaagaaaggaaggtcatagaagtgtagaaagcttttaagaccgtaacgagcagccatttcg  
tttgaaaagtcatttccattggggcttggtagtgatataatcagtttctcgaagcctcaggttggcaaggatctgcatgaaagttact  
aggaccaccaaaagccataggtcggcagctctaaataacaagtttagcaaaaacagtttcttctagaagcaaaacagattccataaattct  
gcaaaaaattccaagttattaagttaacgtaagtttaagaacattcttctagaattctgattcaatcactaggattcaatcactatctt  
atttacttactgagtcgacaagcgaattccatttcacgacgaacgggctcgtgcaaacatagatacgcgatactatccaatcgaactgtc  
tttgttgagctccagttggcaaggcgtttccagaggatgtttttctgattcgttaactgtaggccgtgagggtcaaaacagacagttg  
taatctccagaaaattggagggcacatttgattcaggaacaatctgcatggtgaattcttaagttacagaatattcttgaacagactcgatggt  
ggtggttattggagaaattcacgtagcctcgttctcagagcttcaagaaggcctgtcactgttgatgatgctgttacttgggtcgttgagcatta  
ccctcctgtacaagaacgcgaaaaggtacctgacacaaacagataaggaggaactggccacaacaaaatagagacgaatttaagtag  
agtattggaaaagaaaggggaaaggagacatcataatgtctcaagtgattcagattctgaagcggatttctgtatctgtctaaatcgccgctt  
ataaaaaacagaaaattaccagaatggatactgtatgtagtttgtgtaatttttgagaatcaatgctataaataaaaatgcatctttc  
cgggtttattaacacatgttttagccagaggctatgaaagcggatcgtgagcagacatattcgtcaggagaaggaaatgaaaaggtatgaagg  
attttaggtcgtgcaaatattgaattgggattgtttccgtaagattgaatgcagtaacaactaactaagtttccgagtaaacatgatgatga  
gggaagacaatgcaagcagaacgaaaatttccaaaatcaagtaagtttatcttttaggatggtgtggtgaagagggtgatgatctttcca  
cgggtctgtaatgaaatccttttctttcataaagggtgggacaagttaaactaaccctagaacacgaagatataccttgggctccaaa

ctcagtttgaagcagcaatgaaaatggccgctctatcggtcgtcatgatgatttattatctttaggaaacgttatagtggtatctacatcagtgcg  
ccatcgaatggaatgggagggcctgcatcaaaaaatggtgctttaaacaatatcggtcgacgctatcggttgacaagtcaaaacagcat  
ggtcgtaaaaaggatttgcgctgagacgataatgaaggttagagcggtaacgaaacaaagagccagtgctagtgtcgaagtcctttgat  
ccccattcactgaagaattgaagcatggaagcgtatgatgaaagcttcaacgaattcagttgagttccaatcacttcgggaatgccagctgt  
tgcccacgtggcatcaciaaagcctgttcccttcgagggctgcttctggttcaggatcttcgcttccgctcgtggaaatgttagcgttgactc  
tcttttgaaaagcgtcggctgccccgtctgttctaccgtcgacctcccgttggaaactcctgggtgacgccccggttgcctctcctgctct  
tggttggaacagcagctcatgttctcctactactcatcaagattcagcaaatcttcaatggactgagtggtccggaagtacaaaaca  
accgacgcatcagcatcccacagccttccgaaggtaataatgctcctgctgttcttctgctgcccgtgataaagatgcagaggggttcaa  
cgtgtccttgcaatgctaggacgtcaaacactagtgcatctgctcctctagagttcccgtgactcagccatctgctactcctattcctcgtgct  
aataatgctaaccagttgccatgtctacaatgtcttcttcttctactgcttccgtgctcctcctcgggattggcggtcatgctcttctaa  
tgaagatcctcgttttccgttcttattcattctgataccaggccattcctcaccaccgggattctccacaaatgctatgagttctatgaattcc  
cctgacgaattgtctcaatcctcctggttttacaatcactatccagtgggacccgacacctataaactctgtaccgccccgctcctcctcc  
tggtttgggttcaacagcctccacttccatattcaccaggattttcctcaacatgatggtcaatcacgtatgctaggccatcctcctcctgacct  
tcaagaacttctactgaaccttggcttttaagacaaagaaagttgtaagagttagatagtaatgaagtcgaaaagaaaggttttatatggat  
tatgaaggtatagggaattataaagcaatgaaatctgcacatgtcttgaagtatgataatctagtagagaactactggttccctaaatag  
tggttggtatctgctttcaccaaaggattactattgacagataaacaataatgtagaataatgattgtaagcgtacttgagctaa  
gcatgtgggaaagtaatcctatataaactgcacaaggaagttgtgacattgtaacatcgaaggttctttacatttctacgttgtttcgttta  
taattgtaagaagaagtaaggaaggaatgactatggatagttgtcggcgaccacatatttctatttctatcattatcgtactaagcagctttt  
tctgtgaaaatcttagaaataagctacagattgaaacgtcgtgataatattatatttctacatggtatatttagctactactagaattggagaat  
tatatatagttcttagatcccggatctgtacgtaatacagccttgatatttcttctatttggaaagtgtacattgattaccacgtagattcaactga  
agtttaacccttctgcttgcagaaaactgtatggaaagctactgattccacacttgttactagtgactccaaggcaaaatgcgactaacgttga  
gtaatctggtaacgaaacgtaagcgtacgtacttctgtatgttacttgagttccatcaagagacgctactacacttagattagatgcaaaa  
tccacctcaaacggaaccaatccatcatgttcagtggttctattatccaattttgacctctacgatgaaacatcatgcatggaggcgctgagccg  
cagcgtggcgtagattttgaaatcatgacaatcgcgcttggaaagcaaacaccaggaaatcaacgatgcaatgcttccgaaagcaaatc  
aaaaaatgtaagaaaaggtagatgcaacgttctgactattaggaatgtgggagatcaggtctacatggttgaatttaccacactaac  
attgaaacccctgtattggcctagtagccgtagaaacgacactctcgtgttgcgcggttttggatgtaggatactggattgccagtgatc  
gatgagttggcgaatttggaagaaggatcagcggattaagccatataacataaattgggacaagttagaaaatgatatagtagatgaaa  
accaagagagatcagatatttttcttctggaagacgaaagtcttcaaggacagataagccattgcaatgggcattgaagcctcattcttctgg  
aaagtatgcttatatgaagatgggtatcgacactcttatccaggaggattgcttcttatttctcgaaggaaacgagctcagcgcactggt  
ctgaaaggaattccggaatcagagactccccgtgaaagaagacgatggctccgcggttaaagcaggaactgatctcttttgggtgtccatg  
gaattggtcagaagagatctgaaactggaagacaatgcttgttacaatcgtactgttactaatgattatttctcgaagaggaaacgctatc  
aattactaaaactgtaatgtgttctgatcgttaattcaaaagcaaaaactaattatgaacaaaatccttgttacgagatgattatgaacctca  
attgctgccatctgctggaggaacaagattaattttgactgcttccagggtactgaggacgacgaagaaagcagcagatgttgatggtaaccg  
attccacattgaagatattgaaattgatagcattccaactgttcgacttttggggatgtgatgagtgatccttactatattgtctaccataa  
agattccatcattcgtctgtcattcgagaagcgaatcgagctacgattatggatagattgtaatccttattttaaagaaaataaaggaaggatc  
tttatttgggcattcttaggtgctaccgttgttttgatattttacttcaacctacgttcgtaaaggagcttggccccgaaatagaagacgat  
aaatatttaagttgacacaaatggattttctgttttgggtggcctataggattttcctttactcaatcaaaaaagatgattcccaggagagga  
cgcggtctagccatttctgataatgcaactatattaacaaaaatgttccgattcttacgcatattccgaaacgaccgctacgggtgtttgg  
cagtggttctttacaacattacaacttctcgtatgtgtcttatttaccattactaacctgaaacagctatcgcatcgtttaaattcc  
tacagtgcagtgtaattatcgaaggtatccatccctctaaactcgttttctcgaaaacctccagatcttaagagtcgttctcggccaatg  
atgcacctgtcactagttatcaacaggcactcaatcagtcacactcgaagataatgaaagctcttctgtattgatggattcagaacggg  
atatagaactgaaacgcgaaattcaagcaagaaaaacgagcaaaatggagaatgcaagagttaatgagaatgccaaattgactacgttt  
ttacaagtcagaaggtatcttgcacaaatattacgatgttaccgcataccagttactggaataatgaagacttggtcgttcttagtt  
gtcgaacagccaggaaattggaatcgtcaatcattgaacaatcagaggaaagcgtgtatctcacgataatgcttctacattgtaacaccga  
tgacactataatggctgatgatttcaaattacatcttcttcttagcagatgggagatctaagaatgaggcattactactattgaattgtt  
taacgagttataagtttcaatcactcaggatataattttgatgatgttttcaagctacattatccctatgtcacctcaaatcaaggatgagact  
tttctaaattgaaaaatgttctaaagtcacagatatttattacctaattgtatacactagatttaattatgagataattaattgacaatca  
accatagaaaatggactgtgcttgaatgttgattcaaaattcagagaacaaaaattttaagtaaaattataataaaggtagctttgatgc

agtgttgaaacgaaaggaagtcttctgcaatttaggatacgttatttagttgtgatataccaaagtttacaactgttgcttttcaaaaattca  
aggttatgagcggttatgagaatgcagatgagttacttgatcttttaagaaagcaaactactggcttagttcatttggaagattatcgacgggtaa  
aacaaggaattgctgaaaaaaagaaaaggatgcactttcacagacaaatcaaaagatgtatgagcaaaagccaaataatattttggaaa  
aggttaaaatagtcctaacatagctagcaaaaagaaaaagggttttgagtaaaaatgtgaagaagcagttgcaactaaataagggcaaatt  
gtcatttgacaggaagaactgaagaagaaacagacgatagaattcaagaataactttaaaaagaacatattggaaaggatcctactgc  
taatacctcgtttttaccagacgctgaaaggaagcttttagaggaagcaaggaagaagaataccggaaacaatggtagaagaacaggaga  
gaatcaaggaggaagaaatgttctctttctatactatgatgtaccactactcgatagtttaggttaggtcgcctgaaagattcggtaggtca  
cactactgtctaataatgaaagatcaaatcccaggctctaaaacgctctggataggataaattccttttagttcaatctgattgattatccctcatgt  
acgtcaatttgactagaggacgactgttaactttacatttagcatcacgagttgtattctttatctgaacaaagtccaggggccaaacggagc  
tctgtttgacttgacgctttgcgatgccaaaattcagaggtggcagcaactctgcagttgccagaagtagctgtatagagtttgaacgtgatca  
ttgaattgtttggctaattttttttcagaggaagatccctcatttagttcttaagtcgttttatatggaatatagacatgtctttcgtgcaattgtt  
gggagatgtttgactctaggaaaacgtaagatgaatgacttcttttggacgatttaactaatacatttagtattctcagcaagaagaatgaagtc  
aaccctaaatgtcattattctacagaacaggttgcaaaagtgacgaaaaactagaagatgatgtccgttctaattataaagtaattatttatt  
gctattcctttatgcttttggatgaaactgaattgtgaaggataggtgaaatcaaaaatctgaagtaattatacaaccactgcagcaaaata  
aagatatgaaatgaatgacaccaaagtattgaaatagagaattttaactttggcaagttctttcactgctttgtggattctcatatggataagca  
tgtatatatatccatgtgattgaaggacctcgaggtgaatgactctcagtttgatcatgtctactctttgaggaagcattttactgttcttaattg  
gagctctctcctgattttcagaagaaaaaaaagttaaagccaacaaaagtcagaaagcgtccattagctttcatgataacttaatacaaaa  
acctttgctacgttagaagcaaaaatataatgcaaacattgatcaattagagattagacatcaagaatgacttactttagaacaattgcaataag  
agcatgcttcatcgtttgcaatcttgaatggaatctttcgaatctctcaattttaaaacttagatgcttgaacacacttatgctgttttgac  
ccttagcaacaaatctaaacaaatcatattgtctgaaatgctataccgatatttttaagacaatcgagtacaaatcaagctacttactatagaa  
cgataccagtttgccaaagtaacctattccattccagctggttgatgacagaaaaacatccatccgctcgtcgtgaaaaatcgggctcataatc  
aaagggtatgtggctatataatttctctatgctaattctcattcatgaggtggtatcattcattcgaatatgacattaagcgtttttggctgttc  
tgccggcattctaggcttaactcttattctggcgttctgtttacctctcagctatctattcgtctcgtttctaataatgattagatgaggttagta  
aaattggtagattaccaaccagctccaagtttggatgcaaaaggtattcgaggtattcctcattgtcctgttttggactctttctacagcct  
cgtttacggatgttttccgctgatgcgaatgaatggttacaattccatgctctaaacatggatcctattgattctctatcactcaattgattga  
gttaattctcatgctaaccatgaattgtttatgaatagagttattctgaagaaatatacgcgaaatctttatgatgggaccttgaatacttctta  
tcttactctttatcggacgtctgatagttgtacggcattcattcattgaaacgacatttctgattttgaaaggtacttctgttctttattaca  
tatcttccctttctttcctaaagaaactcaatccctttctaaaaactatgatgaatatgaaatactttgtcgaattcataaatccatctactacgt  
tttcccacagatgaagtaaatgaagcgaatcataaataatattcaagaacatgaaatgtatctgattttcttaaccagatagattataa  
ataacattatctaaagtataaccacacaagacttctttacgtttttataataaaaaaattgaaaagacaataaagtggatcgataaaaatcc  
attaacttaaatagcataatgattattaataatgtccatccgaaatagatggtcataaacagaagaaaaaaaagcaacagaaaaaaaag  
ggacttaacagaacgcggtaaattacatataataaatacctcttaagcaaccattcaaccgttttcagttatgtgagtgcttaccgtttgatg  
aggatattggagagccttcgggagacacaaggttatgaatgaggttaggagaacgaatcatttgtttttccatagcatggaatgcttg  
caaccactcatcagcgaacacttcatggacatcatatctttaatcggatccaactctaacaatgcaacacgactgcacgagtatcgcggggca  
ataaacgcagcaacctccatggtccgtacattcttctttcggctgataaccgcatggtgttcagatgcgctgtgtacatctggcgtttatag  
gtcggaggaccacgtcactaattcactctcttattttcttcaagcttcatctcagaaaaattccttgtgtaggaggtcgcagcaaaata  
aacggaaggaattatcggttagtttgggtatttccacgggaatctacgaagcgcatacagcaaaagataatcgcaaacacatatacaac  
agaacgaggatcgtacaatgttttggtaatgtttctggagcgagatacggatcagaaccaaccacaccagtcgctccacaatatccgcttcgaa  
tgggtatttaataaccacagcacttcaaaaatcaatgattttcacgttacaattttcatcaacaacgagattgtcaagctttaaatacagatgggca  
agtcctatggaatgcaaaataagcgacaccagaaagaagttgcttaaacagcaaaagatctcaggcattgtcatttgcactcatgacaatcg  
aaaacatatcgtacggtgatattccataacctcataaaatcttattttcttataatccagagttcaatgatattgtatggtgaagagcac  
tgcaacacaaaattcagcagtaacctttctggcactcagctccgattcggatggtctgcgagaacgaaattccttgacggcaaatatctttcc  
atcagaagaacgtttcataatgcgaaccgaaccacagcactgagcctaagatcgggccaaatttgccatacttcttaacaaaaccgaaatgat  
cgtcttcgatattactgcttattcgcacttgaaacgcttttctatcagacttttggtagattgaaaaaacgacgtaaatctaatgaactgtggt  
gtttttcatgcttgcatttatcgttttgcattgtttatcgtcttgcattgcgaatgcagtaacgatttcagagacagcagctcgcagctgttgtt  
gtggtgattatggtggtgatgatgatgcttgggtctggtttttgaaaaataactgggacggaatgtcgcgaggatcattttggtcggggct  
ctacgggttcagcagataaggatcattgggatccaataatcctctgaagatggaatcattagcaactttgagataactgggagaagaag  
gtttgtactcatgatgattttcatcgaatcatcttactcgggtgataacaaaccggacctagaaagagaaggaaggaagggggctatttc

cagggcgaaagacagctgaggactgagaggacgtatggtcgttctcatccgcctcatcgtctgaaggaatttgcgagttggaattgaaatcggt  
tcaaagtttttgcggaggaggaccggttaacggctctcgcaagtttaggatcaatgtggtcctttacttgtataggagactgaacacggggcaaa  
ggatgattaggctcatgagagtttcaacagagtttcaacatcttcgaggccaaatgggtcagctcgccttgaattgaagactttgggatgctct  
tacttgaaccttatcttgaacgattttctaaggggaagattcgtctaagaagggttcgttagtataaccagaattaaatacaaggaaaaaa  
acgtaccggaatgttcatcctgaagagagaatttcggagcagaccgtatatcagacatatttagacagcgcgcatatagtgaggcagaaaaat  
aattactgcaaggaatcaattgcaacaaattataagtcgctgattcagagaaggggaaaaagtaataaaggagagaggggaaaaatcaaaaaa  
aagtaaaaatagaaaaatgaaataaataaacaacaaaggtttttacggccaagaactcaaacacaaggtatcaacaatgaaacaaggaa  
aaacaaaagaaacagaaccaggtgtgcaagataccgaatctaatagtgcacataaacgtaaccgttttacaagtcctgattgttttgaa  
tgaaatcgcaaaacgtaacaaaggtataagcaattgaagacgtcaaaaggttccctgaaagggaggattataaagtaataaacgctgtc  
aattcaatctattgtctaacgatcctgagttttatgaggatacaggattacctatttctactacgagaggaagatttgggaaaaggtaaatt  
cagttaagtagcaatcttaataaataatgatccgggtcggtagctattgagtttgatgaatgacgatcaacataacatagcggccattgaacga  
atgatgttctcgtttaatgagtgctaccgaagtcggaattgaattcagccatcagccggcaattgagaatacaaatcggcaaatgaaaggtaa  
caaaccaatcaatcccacatcatacaaatctttcattaagtaaacagttggtgtgtttacatgaaaaagaaatgaataatacaaggaa  
ctttcatcaaaaggaatttggcggggaaaaaatataatgaattgatgtttgcttttaaatatttctcagcagtgctgctgcattaacgtcaat  
ggaagggaaacaaaaaataatgcgcttcattaaagttcgaaggggtcagaaaaaggtagaaaccttttgagatgattgtttatattttt  
tgcaacattcgccagcagctttatctttaagttcgtctcatcttttgggagttcggttaaccgggtgcaacttcggcaattgacggtacattgatg  
gtaataataaccgagacaattgggtttgccgtttgaaggatagaaaacatgggggagggggcggggaaaaatgatggaaagcaattataatc  
attgtttattcaaaaagtaggaaaaagaaaattcaatcaaacggttttcatcaagatccattcatagataattgaataaataaggagaaat  
gaaagtatttataaaacaattaaccattcttaacaatttgtaaaaagccattcttttcttaccattataaccataatagatcattcagatcat  
tctttattcaaaatcccaaaccttaaacatcctatgctatctaagaatttctcataattcaagcagcaatctctgaaacaggtgcaggcgccg  
gggtcgttctggctgacctttattttctgtttccggacaacatcgaacatcttcgggactaaaccaccattaccataataggcaagctggggg  
aggagctacgtaatctaaaggatcaaaatcttttgcacgcataactcaaaaaactgggatagtcattgtcgtgtaccatacattgtccttt  
ttaaatttagtttgcgcaaccaataaaactgcagctgtgagcatgctcagcggcaatttcatacttgacacctaactcccaagtaacttatctatgtt  
ttcaattaactcttttgaagtcaataacttctctgtagtaggtacattctcatcgttaaccggcactggtccgaatttccactgtaagtactcct  
ttaatctcaataaaacaaggaatgccaaacgaataagttcagatatactttaattgctccatgtaaatcctttcactaaagtcattcgatatac  
cgtcctttgcttctttcacgcaaaatctcacaacagctcagcaaccgctcccaaaagctttaaacaagggctgatcactgacttaagactttgtt  
ttgtcgtggcgtcaattgaaacataatgagtcaccattccatcttctggaatgcttctgggtgctgagcattcgtacaaggaatgaagagat  
ctctcgttcgtgtagcattcccacaaatcattgatgatgggtaaaagataggttaccgaccaatgacaatgcaaatgtctcacacgagaagc  
ttccgcaaacgatctcggggactccaggtacacctcgcattaatttcaattttgagtaatgtgactctaggattcccttcaaaattaactctgga  
ggatctactttccagcgcactccgtaccaactggattcgtcgcgtggcgaacaaaaagtaacttgtggcacaagctaaactaggcgtagct  
tccatacaaaatgactacggatgcatagaagctgtattatagcaaaaactctccacgaatagcagatttctccagcgacaattttaac  
accactatgagagccaacaacactgtaaccctgcttgtcagtgctttgtaagttggagatacggtagaaaccttcttgggtccaatgggcaa  
tgaagcttctgcttggctttggccatcatcgaccatacttcaacatccattagctgaattaccttctccttcatccatagggcgcaacaatgt  
tcttttctcatatgttcaatgacagaattgtccattgagtaagaagctcaatttgagttgcagaagtaattgtgtattcataataccataggag  
caattcgttgggaccaagcttgcttaaccattatcggttcaatggcttgatgcaaaacatacaccaggataattgtccatgtcaccgagctcc  
aaacacggcataaccagacaattttgtaatggatttttctgaacacggaaatcataaacagctcagcaagtagacaagtagaatactaaac  
tactttcaatggcataagagggcaaaacaagaatagacggcattctcgggcaataaaggaatattcttcaaatcgatatagtccaaactc  
aacaattgcaaatcatcttgaagattcgtcgataacaactgtgacttcttagcatatctctgagctgttctcctaaagtggtcagtagaagat  
gcaaatggcgaattttgcaaatcaatctcgttctgagactcgaagttgactgaacaggtctagcttcatattcttctagtaaaccttctgtcgt  
tttctttgcttccattcttttcattaacacaattcctcagctggaacggccaattgctcttatttgcgcatataattagatgagctgcaacgg  
gcaaaaggaggactaaataaaaaactaaacctgtgaagtccttttctcaaaaacgcaagatcaaaacacatgttggcgttttcttcta  
acgtctcgtgtagttggaagaaggaaaaagttcaataagcctgtaagagggtaccgacaaagcaaaccttctgccaatcagaggcaagaaaa  
tcggatcttcaaatgaaaaattgagtttagagctattgttagtagttatcaagtagttgtttctgtgctttgttatggataaaatttactttctg  
gattatgcaatttcttttagtacaatatgtaattatcagattgcatgaagattgtttagctttagctggttattcctgttcaaggatgacacatga  
ttttatagaaaaacagaattgagaaaaaaataaaaagaaaatcatttcattggaactttgcatcattatccaaaagtggtcttcacagacgta  
aatgtacagtttttagagttgagaaaaaagcttaactattttcaggacttacaataatgaaagaaagaaagccatataaaaagatagattaca  
atgtcgcaagctatttccctgaggggaagaacacttgatgactccttctcggcagcttctcaggagacaaagagaaaaaggaagaataga  
aggatcaggaacccaatctctcatatcagcagcttctcctgattcaaggcctagaatggagcttcaaaaacaagacaatccttagcctcaat

ctctggttgcccttactctgcgctttcattaatgattttcaaagcgataaaccagatatcgggattcggctttccgcgccaggaagaagacgat  
cgtcatctcccgttacaatgttattttcaaatagttgaacatttctcctagatgcgctgtttcttacaagttatgagatcactagaggtcgga  
gcgctatagggatgtcaagcaacttgcatgggtgtaaaagctccaatgtccaggcaaaggccgagttgtttccaagctcagattgcaattcac  
gctgcatctggatgtactgatcgctagatgtctaactggaccatttcaaaaaatttgacaagcttctcgagaaggacggcctttttccatac  
gattgttagctgtgtaaatatacaacgtacacataccatcatttgtgctttgatttccataggaagaacctttttggtatcgttccaatgatg  
tcttgcgtaagattagtttcagcaagaaggagtggaacgagaaaggcacttctgtctttttgtataaatggtttccgtgcttaataaaga  
ccctagccatgttaatatctctgtcaatcaaccaattttagggcagtggttgaataaggacgtgagtttaactttaaaaaaaaaagtatt  
ctaggtataaaaaaaaaaagaaaggaaaaaggcagatatacagtttctagcacaggaagaaacttacatccatcgaagggc  
aagcttaggaggtcattgatgttgaaagattatagattgaattcagtgggacaaaagacagagaacaaatgaaaaagttgctattttgg  
atatttcaattttataagatttgcgtttgtgggttggtcaagatacaaaactttggatagctcaggtccttaaggcaacaaaccaagattgag  
atcattcaaggcttcttatgaaacattagaggataaaagaactatggcaggattcaactttggttgctagaagggacttttctgtaattgaa  
tctttgaaatttcaaaaaaaaaaagaaagagtaaaaaaatatatacaacaataataataaacaattttttctttataga  
aaaatcgaagaaacaatgtgcgttgaataaattatagatttttggttttaggtcgttgtaacaatcattttgtttacatgtgatccatcct  
aagaatatccttatttctgcgtccaaaggattcatatagacaataattgttaaaattagagtgaatttctactgagaaatcctttatccttccttc  
cactattatgtcagttgaacatataaacatcaaccgcttgatcctagtaatacaacacgatgtagcaagaatttaatacattttcctgt  
taagttagagaattcaaacccataaggttctttagacaactttaccctaaaggcaagtatttctgaaactttgtaactgattaactgataaa  
actgatcagacaaacgtgtgatgtcacaggaagaattctgtggagatgaagcgaatttataagtaaagtattaatgcaaagttgatgtaat  
cagatcatcattcgtttacatgaaacgaacaagcaccgatgcctgaaagcaatattttcttctgattcaactggcctaatgttacatataaaa  
aataaagaattcttagaaacgaaaatctttacccttagtctctatgctagctagcgggtattaaaactattccaacatctttgggattgta  
tctactaaaaaagatcgcaaatcttgcctctatgacttttgttcttaattgttttttttttacaatcttctcatctttgcttccatgaaa  
gcagatccaaacgatgcttactaaccttctataccaactagcaatacataaggaaggacaaggggatgcatgttctggaacaataaa  
tggttggaatcacgttcttttttttttttttcttatcttcttctcgcgcgaacgggttgagtaaatcaataagctccttcacccctc  
ctgaaatccataagctatattttccagacgcgtacgcatccaacgtttaccacacacgatcactataaccgaaggtagaattatctgtaagta  
actgctggtttatcataattttctttgtttttttgtgttttaattcacagcaaatgaagatgatgtaattgtccttcagtaaactaaccaagact  
atgtagttatattagtcagcaagcatgcttctttagaacaactcaagagtaccggaactgttgcgtttccgacactgggtatttgaatcagat  
tgccaaatacaagcctcaagatgctactaccaatccctctttgatcttggccgctccaagaagcccaaatgctgcccttgcgatgccgctc  
gaatacgcgaagaagcaaggcggctctcgaagaccaagtcgagaatgctttgatcgccttctcattgagttggtaactaaatccttgctatc  
gttctggcgtgtttccaccgaagttgatgctcgttatctttcgataccaaactaccattcaaaaggctcgtcaattgattaagctctacgaaga  
agaaggtatcagcctgagcgtattttgatcaaggttgcttccactatgaaggtatccaagctgccaagcaattggagcaagaaggcatccact  
gtaactgacccttctttcttctgtaagctgctgcttgccaggctaatgtcactctcattcccctttgttggcgtattctcgacttttca  
aggccaagtaaacctgtaatacgttctcacgaagaccctgggtgccttagcgttagtcagatctacaactactacaagaagtacaactacaag  
accattgtcatgggtgcttcttccgcaacatgggtgagattaaggagcttgcgtgctgacttctaaccatttctctgctcctcgcagcagctc  
aacaacagccaagagcctatcccagaagcttgatgctctcaagccatggtcttgacatggaaaagatttctatcttgatgacgagtcgaa  
gttccgcttcaactcaacaatgatgaaatggcctcgtcaaatggctactggatcactgccttcgccaaggatgccaataccctcgtggtcttt  
tgaaggaaaagctcaagcttaagctgcttcttctgtatgtctatttcttttcagaaatttatgttcccttagattttctcgatagaaaataata  
aactcagtatacctcaattgattatcggttaataaccggtctaaaaaatgattgtttacagtacaaatgaacacatgacttctctgttttaacct  
atagctgatagttatataacgttactctatcactgtcaaaaagcaaatatcgctgagtgaaatcaataaataaaaaaccgaatgaaaatgggt  
aaaaagaaagaagtccacaatattcactacacatcaaaggtctgttcatcaaatatctttgacctatcttggaggccattccaacgcttcca  
ggtgcaattgtccgttccgaagggttaattcccatagctggcagctgcaatataccgcatgtccaccgtaaccgccaaccagtgcttctc  
gccatacagaatcttacctgtaagctgatgaattccacagaagctttacatgatcatgaccggctacagccacaggaattgcaattcgctta  
acgtccttgcgtccctggatcaaataggatgaggaacatttctcgcgatgatccgacctgtcctccacttcgcaaaattcttttaaggtata  
tgaaaaataaccattgaaataggatcgtttgaaattctgtctttttgatcgcaaccaagcaagttggtctttcttgatagcatatacacgggaca  
agcccaccatttgatgttctgcatgtgagctagtagtatagaaaatcttttgggcttcgcaaaacgaagttccaaccccgaaaatattt  
cccattagtcgatatttccaggacctgggtgaaacattgagccatctcatcattagccaaatctcctaaactgcatgatttcataagtaacag  
cgaacggtatctgtaactactacggaagccaatgcttccataagagacttttggaaatcgtccaccgctcaccagtaatacagctccctgta  
agaggacaagatctggagattctcgttttaaaatccgtaaaaaagcatgagctgttgcgtctgcatacagctgtgggacgttctggaggat  
acgaatctcgacatttgcaggtcagctgcataatgcaagctgataactgcaagatctcaacgttccctcctatcgtcaagggcacatctac  
aatgcggggtcgttcttcaagatcttcaatagctggaacaaggggatacagcaaaaatcgttgggtcagcaaaaattggacgacctaggtaaa



gaaactgtgattgactgactccatcctcttctgacttcgctggcatcagtaccgaataaaccttccacatcacatacgtcccatttggaccgtat  
tgaatagaaggttatgtttcttcttcatcaattgatggctgatcattaaatttgcacgggttggtgtcacaccagcaataacctgctaggcctt  
ttacgaacacgtacgccgttccaaggaagccatgatcgatacaaatatggctagagcgatcccatcgccaaaaggaaagtacaggtctgca  
aaaggagagaaaagcccgcattcgacgatgcgaacatcctcaattgggtgttgaaggtaagtaactttgaattggaagatgtagggaattgc  
gtcttaacaagccagtaatacaataagaaggcaaaagtaagaagcacagcataaaccaagttcttgcgaatcaattgaaccgttctgtta  
aaatcctcatttttactaacgaggagattatacaaatatacctttaagaaagactaaaaatcgccctctcgcaacctctattgactgatctgt  
cccagctttagcttcttgcgaataagccagtcgctgaatttctgggtgaagatagagatagaactatgaataaaaaccagtcgtagaaaactt  
cttttcttggaaattgcatgaatacagtgaaaccactacatgtttgttacgttcagtatttaaaaaaaagaatagcgaacttcaagatgattaa  
aaagttgtgtgtacaacgtttaaaggtattgtgcagtacagcgctgtgccttattatggtaaaaatacaatgttacctgcaataaacctgagaat  
ttcaagaaaccttcttctgcccatttcttcttattcctgtaaatctgtatatttaacaagtaaatatgtctgattacgaagaagatgaaggtttg  
gtatggacggtgcggttatggaagaagaagtgatgaattcaagtgccagacgaaaatggcgaacaacaaaatggcgggtttaggaggagaat  
ccactgcaatattgtcagaagacggtgccagtagccgtgttggctccttccaaagccgttgaaaaagaaaacgtatgacaacccatacatg  
actaaatacagcgtgctcgtatctgggtaccggtgccttacagatcaggtaagatagcaatcaaggcgaagaataaaaaatggaattatga  
atggttggaaactgagaaaatgcatcagtggaagctgctggcatttactacctttagcctgtgtatagaacaatgttcttcaaatggaacaatcct  
tgtgattttcatatagttattctccagaaaactaacagaatgtatagatgaatgctcctgttttagtggtatttgaaggcgaacagatccatt  
gcagattgccatgaaagaactgcacaaaagaagattccccttgggtccgtcgtatcttaccctgatggaagttatgaggattggagcgttctgaa  
ctcatctaattggaatgtgtggcatattaataaagttatttaagaaaaataagaacaataatgggtggttttggatttctcttattcaagaaa  
gaagtttcttcttctgtatagtttgaactatatacctggagttgggttattgatgatcaaacgtcaagaacatacgaaaaaacttactcttcc  
ctttgttaggatagaaaagtttcatagaaaagctctttaaattatgagcatgctgcttcttctataattatacaacctgctgcggttgacattgtatt  
ctgaatagcaacatataagaattctgtgtatgattgtatcacgggtgagttgcatgttttaagtttcttaacaatcaacttgttttctacaaagta  
gtatttctcagcaaaaaataatgtgcctagctctatgttttagtgagtggttcatgatgctctggtacaggcccaatttctccaatcttgatt  
tgatctgatgtggaagagagaggtgtaacgatacagctgaaagagcgggcatggcatctagtataattgttcagccgatttcccaacttggat  
gactctgaattgttaaactggtgccattgacaaaatgacatgaatcgcatgagatcttccaaagtcatacgaactttatgaggaaaattgctt  
tttagatagaacatcaacaacagttgttgcacttgtggatggagcttgtcaagatctgatggaagcttacttgaagatttaaaccagc  
tcgaaagcagactatactgactaagcacccaaaaaggagatcaacctggcgttcaaaaaatagctccggaagtgcaatgagagatact  
aggccagtcattgcatccgcacggtgatccatgattggcgtatcaataaattgagccgttagtttgcacttcttctgataacaatcacgtt  
aataactttaatagttacaaggcttgagctctatacacttacttcttgaacagccactcctcagaacaacgcttccaagagctattccaattgct  
atgaaaggatgctgtaaaatcaactcggaaataatcgtcgaatgctctatagtagtactcgtagctgctccatccacggcgttgcgaaaccgaa  
tcttgaaaaaacatggtatacaagcactcacggaagagttgcaattcctactgatacagcaaggagtaaaccagaaactaaagtcctta  
aagttcccatttccaatctgttggatagctcaggttgggttcttattacaaatttcaaagtaaacaaagtcaccaaactgaaatcatgtctc  
ctagttgatggccgctgcaagcaatataattgattgtagccaatccgccggttctttagcagccattaatgctatgttactatatactgaat  
tatggttagaaatgcatcgatacaatctagctcaatttctgtttgtaacagcatagaaaggagacttacaaccccaccaggtcaattcactt  
cgggtgttcttcttcttcaatgcttgcagaagctcgaagtagttttctcatcttctgattatgctatgagatgaggataaagtcattgtg  
acggcaaaaagaaccaaggtcgggtatagagaagagatatttggaaagattcttctgtaaaagcgcgagaacaacctcgaagcaaacggtt  
tggtagcagtggaacatcttggaaagctcaattgctggaattcacagatgaacaatccttattttagggcgttaacactagaaaggtatcata  
aataagcacttctgatttctctgagtgatgataatttctgcttcttctgcttctataataaatatgcttcttctacaggaactggtataatttctt  
caataaatattagaaaaaatcaattaacaataataatgtgaactgaatgacttttcatgaagagttctacgcaaacaaaggacgctcag  
gtcttattacagaccttgaagcgaaggtatgtatttaagggtacagctttaaagaatagatgccactaaaaatccaattaatcctgcttc  
tgacagttcgtaggagtcgttttcttcaaaagcagttgcagatcaattataacttaatttcttccggatctgcatgactactcgaatgacttta  
tcagatcaaaaaaggattacgattttgattatgtaatttttgggacttcttctagcttcaaatctatcaacttatttattatcagagtta  
cggttcaataatatactttaaacaagaacaatacgcgcttcaaatgctagcacaaccattgtagatgataattacttattacagatttttagt  
acagagtttaggacaagcatagaataactaaaacaacacgtgaccattattataatataaatttagtatacacgaaagttttagcatttcc  
actaggcattaagggcagtaaatgtgaaatcataaacccacaccaatacaaaaaagcggattatgagaatagttttaaattttatcatt  
ccactagtggaaaatgctcaaaactcaaaacatgcaaatgaaatgcatcatagatactgaatgtagcttttcaaaaagaacgctcaaaatt  
ccgattctgacttagaccattatcataaattgaatgaaccctacggaagtgtgataaacataactcgtccattttgcttattaaagccgac  
tcgggaatgctaaacttataaaaaactcgttgcctagagtgaaatatacctcagtcgaattacgacacactggtttctgataaaatgaca  
cataaggccaatataatttaagccttcaaatccagcaaaagttctgtaattgactccaataaacagctatttctccaattccggttccagta  
ttgatgttttcttaataatttcttcttgggtgtgaaacatctcagtaataataccaacacatcagttactgtccatgatcgtttgctattcagc

tcttacattaagatccagtcggttggtcacttgaagcaaacgtaaacatgaaagggttgaacgaatgattccaattagtttcatttcatta  
ggcggatagaaactatggccagcaagttcccttgaattctgacattcgttgctgatctctgtaatttcatactcaaaatcctgattcgc  
ttataaaatcccttctcccgacactgcagttctagaagttgatcgattacttaggtcatccatctcttccgcttatgctgctccttaattgtgt  
tcaagtagtcttcttttcaagcttagttcccttgaagcttcaaatttttgagcttggaactaattttgattatattgtccaaacattct  
tttctcttctcaatgttccaacttttgatgacaccgaagacaattctcacgtaatcctcgaaaagggaagaagcttggatctggttccgaa  
cctgtatcaaatttttgaagttcatgagattctcattaagttcctgcttaattcctagcaataggcctcccgccattcataccaatccctgcg  
ttgtaaacgcgaaaaggtttaattatccgaaactgtaattcattaatgcttctcacttgacgctttctatactcataaaacagcaacggat  
tattctgataagcatctcagccattttgttacgaaatccttccctcaataatattctccaattttgacagctaaattgtacaattcgagatt  
gggaattgcaaatagtaggactccaaaagttgagcagtcgtaattgaggactttcagctgaaccagatactattgttccacgcttttgaactc  
ttatattgtccagaactcaattctgtcatattcaaaaattcctcaatgtcaaagcggcaaaacaggatcaaatgaggatgaagcaacctct  
gttctgcttctcattttgttttctcatctgtaggtacaattcattaacggtctctggcatatcagcggcatgaagacacttctccttaatatc  
tttacccttgaagaactcaaatcctgcgcttcttaaggtaaatggcgtaattgactgctattggcgatagaaggaatcctttccattct  
tgaaatctgctattgcaaaatcatcagaatagaagattccggcgtaaatgacgctgcagggccaggatgacttcatgccttaaggact  
gcagccacagatttcaattttatccgggctatcattttgtcattttttgggatgaaggacttgaatagattcctgcttaaagtagaggaaa  
gaaacaaattccaaatcattcaagtagatagacttctggcatttcggattgtgacagtcggttggcgtttagctccataccacggttga  
tgactgtacctttgttacgcaaaaactttgtgagctcctattcaaatcttttaggtgaaggagaaaccgaagtagcttcttttcaaaaa  
gggactttcgggttactgggtgcttagcatgaaggtgtaacttaaccgttttgccttttatgaggaggagttcttcatatgcaacagctctatt  
tctggagaaggaagcttctattggtaacgtgagatccaccacttctctgctgttccggtacattctgattttcattacaagagaagatgg  
aagattgacgacacctgtacatccatcggttcttattatcattatctgtatcttgaaggagaaaattcatcaaatgctttgtcacattcatatc  
atctcaccagcacaagagttctgtgtttccgaccttgaaatcagaattataatcgactgattgatgggattgacagataaaggaagagg  
atgaacagctgagtgatgcatatagcttctcccagaggaagattgaagcgaagctggttcgcaggaagcagctgtaaatccatatcag  
taggattttcgaaggggaagcaggaatattaaggcggtaggagggtctatagatgacttaagatccttactaggtgaccaatggtatcatcta  
tagatagttcatgagtgaggacgaattgggtgatataatgactggaagtaagctccatgcttatgtccatctggttcggaaaaattcaggaacagtag  
gtggtacatcaattggccgagtgagcatcatgtcttcttctatgcctcgagccagcaggggaattgacttaggagcagacgaatcagcag  
cattataaagcggaaaatgattagagatattctgactgtcgagaaggagttgctctgttgagctggttccctaacagactcaatgccagaaa  
ggtaagagttatcatcatgaaaccgcatagtgacatccatgctcattcagtttcttcttctgattgctattgagttactttgtttatggaggctt  
tctgagactccataagaagctattgagaggaatagggtgatcggtagctgtctgagaaggattcggtaaatggacacagagttggataaag  
gaggtgaattcgtaacatccatgtcactattgtctcattcttcttagctgggaaaggaggaatgattgggagcattggacgaaagggattctc  
tgatccctgactacttctcattcatttattatcagacaattcattaggagatacattcccttcttctcggctgaaacagctggcgttatggcagc  
agatggaggagaagaaacaggaggagctgacgaaaacgcgcatcgcgactcattttgataccacctcacagcgtggcttgc  
agatacacgacttctcggcccttgaatgagttgttggtcattcttctcgggagtggtcattgtttggatgcaaacattatgctattaggaatac  
aatcacggtattattcagtggtcaaaatcctcgttgaagcagttcattttgctagcaggatcaagtccaaggaagaatcgtttaagaatt  
cctttccctgggttagcgttcttcaattcttgacagcatgggacctccaatgaatgaacgttcttagtcttttctttcatacaaatcat  
cagtagccgcaataactattacggcgaggcgatgtgacatcgtcaatgaaaacaatacgtttccaagtataattgggtgtgttttaggttcaagtt  
tccaattaccaactcgaatgaagtgtcaatcatgcaacacagaaagaactaattacgactccaacaaagctacgaattcctaattctt  
taagcttcattagttaaggtagtaataagattagcagaattgaggattcaactgattcaataaactaacgataacagcgttcaacaaacg  
gtgttcacaattgcttaacaaaatgaatatcgtaaagatctgtcgttttagtaacaattgctctctgagttcacaacatgcttgggatattat  
cagattaggaatgtaacaattgatgaaatgatgggcaaaagtaactaaggatataactcaacgtcctaattaattaattataaagaaaaa  
aaataaatgcttaacttgataaaagcaacgggcaagtaatggactttcgaacgaagcccgttccatcattcaaaataagcagcatgaaa  
gatgaaaacgtacttataactaaactgaggtgatttttctattttacctcatattttcttttcttctgactattggaactacattagtggtataac  
tttttagagttcacacattgtcttgtaacacaaaaagggtttacctgtaacaacagtttttttttttttaaaaaaaataaagagttgtagc  
agccacataactatagcattcgtattgactgtttacgttctcattttgtaaaaaagacaccttctcagcaagatacaattgaatgcgg  
atggcgcaataattgacttcccctcaactaaaactaaaacgaaatcctcagccataaaaccttttttctcaaaaagacactcatatgccaat  
aatgctgtacacgaaatgtccagtcacttatgaggaaagttacgttgacgaagagcagatcccaaaacatagtgcaacgcttagtc  
attattgaaaaatgaaccaatttaacagcttgaagagaaatccacgtaatgcgcaaaaatagcaagcgttatcgtcgtaatcctgtaaaac  
agtcaaaactaagaacctggaacgttcttcttctgcaaataaactataaaagaagcacctcctgctcttttctgtaagcgcctatgccc  
ttcttctttgtgacatagttgatcgaagacacactctttgtaacactaatcattcatctaaacagcttcttcaaccgtcttttgaca  
acatgcaaaatcgagacaacgatcctgatccaagtggtcatatgtagtctcaatacagagcatcctcaaacatctgcacagggggaacatac

atcttctcgtgactggaataaccagaacatatgtatatgagggcaacgatccaatgcttctcagcaagaaactgataggaccagcgttgcttcttc  
cggcaatgaaagatacactgatagcgtcaaggaacatgactccacagctgtagactatgacaatgcatccggcgccgtcgtccaaatgca  
cagaatcacctcctcatcttctgatgaaaatgctgctgaacaacgacctgctgatacacaacctacacagcgacagcagcaacctactcaaca  
agaacatcaaccccccttctctccagcttctgctcataatgaaaaggctgctgaagcagctaatacaacagcaagaacaacaagaaggt  
aatgaggacgaagacgaagacaacgaggacattgatgcattaatagaagatttatactcccaggataatcaagaagaacaagaagaaga  
agatcatcacgaacccgggtgtcaaaacggtccagaagaacttccaaactgatccaagcagggtcttccacctgaagttgaacaga  
gacaaaggaaatattggtctaaacaaatgaaggaggaaaaaataaattcaagaagttcctttcttcttataggtcctatccaattctgca  
tggagctgcagccgcttctgctgctggcttctgactggtagactttgggtgcttcttaatgctaaatgcaaccgttggttcgttc  
aagaatatcaagccggttcgattgtggacgagttgaagaaaacatggctttaaataccaccgttgtgctgatggacataccgttgaattggaa  
gccaagatattgtccaggtgatattctacatcttgatgaaggtaccatctgtccagcagacggctgtaataactgaaaattgctaccttcaagt  
agatcaatctgcaattactggtgagtccttctgctgcgataagcatcacaatgatacctatgactcttcatcttcagtaaaaagggtgaggcattc  
atggttgttacagctactgctgattcgaacttctgctggcagagctgcatctttagtggcgacgctggcaagctcagggtcattttacggaagttct  
taacggaattggtactgttcttctgttagtcatcatgacctcctctgtattatactgctcattttatcgactgttcgctcgaagactcttag  
aataactttggcaattactatcattgggtaccagttggcttcccgcagctgttacgacaacaaatggctgtcggtgctcctatcttgccaagaaa  
agagctatcgttcaaaaacttccggccattgaatctcttgaggcgtggaaatcctatgttctgataaaaactggtactttaactaaaaacagacttt  
ccttgggtgagccttactgttgaaggtgtcaacgccgatgatctatgattacggcttcttgcacttctcgaaagaaaaagggtctggatgc  
catcgacaagcattcttgaagctctaaaaaactaccctcaagccaacaaagattatctaatacaaaaattttacaatttcatcctttgatcct  
gtttcaaaaaagttacggctatcgttgaactccagaaggtgagcagtgatgctgtgaaaggtgctccattatgggtatthaagactgttcaa  
gatgatcatgaagtttctcaagaagtcagtgatgcctacagagaacaggtcaacgatatggcatctagaggtttccgttcaactcggtgtgctcgt  
aaagtagaaggaacaaatgggatattctcggattatgccttctcggatccacctcgtgatgacactggctgtaacattcacgaagctatccgt  
ctgggtttagaattaagatccttacaggtgatccggttggtattgctaaagaaacagctcgaactaggcatgggtactaatgtttataatgcc  
gaacgccttggtttaggtggcgggtggtgatgcccaggttcagaagtttacgactttgtgaagctgccgacggttcgtgaagtcttccctcaac  
ataaatattcagctgctgaaaattcacaacaaagagttatttagtggccatgactgggtgatgggtcaacgatgctccttcttgaagggctga  
cactggattgtgctgcaaggtgcttctgacgctgctcgttcagctgctgatattgttttctggccctggcttcttcagctattattgatgcttaaag  
acatctcgtcaaatttccatcgtatgatgcatatatcattaccgtattgattgcctccatttagaatcttttacggattatggattatcatctt  
aaaccgtttaaagaatctagactaattgtcttcattgcaatctcggcagcttgaacgctagcaattgcctacgacaatgctcgttggcaccg  
aaaccagttaaatggaatcttctcgtctgtgggcctctctacggtagttggtgctcttttagctattggacttggattgtatataccacgatggtt  
gctgcaggacaaaaccggggattgtacaaaactttgggtgctactgataggctacttctcctcaaatcttactgaaaactggctaattttat  
cactcgttgaatggacccttctggtcttctatcccttctggcaattgactggagctgattatgctggtgatattttagctaccatctttgtctttcgg  
atggttcaaaggtggccatcaaacgtctattgtagccgtcctcgtgatggatgattcctcgggtatattctgtttatcgaggagtttactgat  
cttgtctgaatcgagcaaatgtatgctttatgcaacgtaaggtaagcaaggtcctactcgtacactgaggatttctctacggttgcaacgt  
acttcaactcatcacgaacaagaaggaagaatggttaattgccagctccttattttggttctgttccctcaatccttttgattatataatag  
ctttagatagcatcacgatataatgtagtaaatgttcaataataagattcattcaaatcttgcaaaagaaaagaaaataaaaaaat  
aaagaagaaaatcacttcaaatgaagctagaaaatccttttctcgagcaataaaagataacagcgtctataattccaagtaaataatccc  
aatcataacatctaaaagcaactcgtcaagaaagtaacaataagcaaatthaatagcaaggttttactgataggaaataactactttaa  
ggcagaggaagtactattaaagtaatcattgatccggagaggaattacaacagttcataaactggaacgaagatttttagcacgat  
agcgaataaaaagctgactcggtagatataatcagtaacaagagtaaggattggagacatcgataacaataattatacaaaaggaagga  
cgttttaacaataataagagagccgaacgctaataaagtaagactccttaagctatacagtaacctttgaaagccttttctccgttagcca  
ttccagctctcttcttcttcttcttcttaattcatcctcatggcgagcagcccagcagcagcttgttcttcgcccatacatcttccggtagctc  
catatcgtcatcatcgctatacaaaagcatcacgggagacataatctgtttccgttttcaaaaattttcaaatctcagaagacacgtctgataca  
ccatctccttcatcatcagatacaaaaagctctcttaggacgattttcgattttaaactttgaggcacgagatgaagatgaagcaacagaagga  
ggaaccttcgcccgcctatcggcagcatttgaatgtttgttacttacacctgccgaagacctgattttggtaggagcgcgatacaccactag  
cgttttggacttcagcgcgagttttgtcatttggcataaccgctgcttctgcataatttcatcttctgcaacagaccgcttgcacgtttg  
ggccagcctgcaattggaccagttcaccaggacgagagcctactttatttcttattccgctgaaaggcgcatttgacagcagaacgagctaa  
attagaggccggccagtaggtctaggagagctgcttttaacatgctaaaggacgaggagttgatggattagacgatgtagcgaataacgat  
tactcaccaaaaaggtatccttctgtgggggattttcaggagttttagaagaccgcttaagagcagaagaggtattcaccttagtattatctttgt  
gacggaagatagttttgagagtcagacgcctgacgaagtaattcattgtaagaaaccggttcttcttcttaatcgtccttcttcttctcgtc  
caacactcgagcctcgtctgctgatagggaggacttcagatcttttagcattttcggaggctcgttctgttcttctggttgaagtcgttctgttct

tcttcgattttatacgcaactcgcgttctctttgagctcgtcgtgccggctcgccttcttcaattcaattgccttcgcacgaacctgcccctttt  
caactgctccagttgctgaacagtttgagcagattgactatctgagcgcgataagcttttgaaagatgggttccggccattactaaattcctt  
cttgagctgattttttgcaaaaatccaatattccttaaattagaccatgccacttagttcttctttaaattcctataaatagaggtagtcgac  
aagtttatattcttggtcagtataacaacgaagatcatcttaggcttactaaatgaaattgactagggtagggtaacctgactgtttatatacgcga  
tcatctacagacacgaaagtcggttttggcggagtttgaccatcaccaactactgtttgcaaaatggccgaagaacacgatgaagccctccgc  
gctgctgaattaagaaagagaagaactttccgtacctttgcttaccggtgttgagcttgaagcttggatcttctgctgaggaattgattg  
aattgtccctgctcgtctcgtcgcgcatgctccgtggtcttggagccggtgcttctcgttcatcaagaagcttcgtaaggctaaggctgaggct  
cctgtcaacgagaagcctgcccgtgtcaagaccacttgcttagcatgatcatccttctgagatgggtgggctcttctgttggatctacaacggta  
agcttttcaaccaagtgaattcgcggcaaatgattggcttacttgggtgaattctctatctctataagcccaccagacacggccgtcccgg  
tattgggtgactactacagctctcgtttcattctctcaagtaaaaaatggaaaagagggtgtgcaaaaacatggaaaaagctggatataatggtg  
ggatgtccgtgcttcttctatagcctttccatgtattgtatctgcataaaaattttccgtttctatgaaatggtaaagttggctcaagt  
ttgatgtattgtgaaagtggtatataatgtaaaagttggagggtagtagtattgcaaaagtaaaactagctggtaacgtttgtatcaciaa  
tatgtaagcccgtaggattgtaaggctaagcatgaaggatgtttgataaactataagttcgtgccgttgcggttctgcatcaccagtataactat  
agaaaacattcatagaatgctttaattagcatcattaaattcgggtcgacaatattttgcttggaaatatagtatttacgatcttctcacacagac  
tgccgttattttcaaatgaatgattttgacttaaaaagttcagaaaatagacttgagtagaaacattaagaatataggaaattatgataaaaag  
aagtcatttttgacagccagatccagcttttgcgcaccctttcaaaatccaaaaagttgcatacacagtcagaatcaaatgatttaaacgagt  
cggttgtagaacgggttttccaaagtcagtagataactggtacgcctagactatggagacttattaactcaggtaataggattacatttgagagt  
aaaagacacatacagattcaactactcacagcaagcaactcaacatggtgagctcaaaataaggaagctttacgaacaaagtaactcaactgaag  
acttatcctcacttctcactattgtatggcgagtttgatttgcgtgacattgtaagtttcaagatttacctacccttggccatttcaaatagagc  
aaaatgagcaagaaaagcaagtcagcaggatcgatacgacatgcaaatggagaactaatttcttattgtctgctctagaccaaataaaaca  
agaacgaaaagtccttagaggactaccgaatgtctctagagccgtttctagatacttctcaatcgctgaaagacaacaaatggaaaaagaacca  
gaattgctggcccttcttctcagtaacgtcgaattgctaaaaccagtgctcgtctccgggatgtccctttatgccttctcaaatcagcaact  
agagatcagatttttcccttgaaaagaaactaaaggaccagattttcgaatccttgattccgtgagcacaggatacgtgaaaagctcgttga  
tgaatgacattctgattataatcattgatcttttaggttttaattttgagatcctatgaaaggaaaacctggtcccttaatacaaaattacctatcat  
gattcaaggattttgcgaaatctagctgtcaatttaattcgcacctgaaacctaactcatatttttaacaactgtacattaagttttgtatatt  
gcgattaacggattccgactgttaaagcaagcgaatccacagaatgatggtcgaactcaaaatatacaaaatgtaaaaaaaaaaaaaaaaa  
aaaaaaaaaaaaaaaaataagaatagaataagaaagaacnnnnnnnnnnnnnnnnnnnnnnnnnnnnnnnnnnnnnnnnnnnnnnnnnnnn  
nnnnnnnnnnnnnnnnnnnnnnnnnnnnnnnnnnnnnnnnnnnnnnnnnnnnnnnnnnnnnnnnnnnnnnnnnnnnnnnnnnnnnnnn  
aacgtacgtaacgtacgtacgtaaacgtaaacgtaaacgaaacgtaaacgaaacgtaacgtagtaggtacgtacgtaacgtaactaacta  
aataataataaaaaataaaaaataaaaaataaaaaataaaaaataaaaaataaaaaataaaaaataaaaaataaaaaataaaaaataaaaa  
ataaaaaataaaaaatagtgcttgataaaactaacctgcaatggatgactgtacttattctgactaaaacctacataccaatattgcattcgtg  
aggaataatggtgaaacagaaaacgaatcaagaaaatggtactaatttttttaattggttcttacttaggttaacgacattttattacaatcg  
acatatgttctacatgatgaattcgtgacaaaattcataaattgcattaagcaagttgcttactgactatctctggctaacaagagaagtaactt  
taaacggaccgttaattatagcttatgatgcttctcccaagatgattattctgttgtttatcccaataaaacaaaagttgagttgacaagtaaga  
ttttgaaattcgcattgacgagaaggcgtaaacaggcaattgagcagtaagacgtgtttgtacttattggctattaaccgtatacgaactac  
agctatcaagaggtgtcgagagatttctcaggaattgaataatgaatcatttagacacacatccatttgggtgtatgtactatacatcgaatg  
aaattcaaagtttgaagagtttcttacgtctctatggttccaaactcgaatgacattaaggaccgagcggagtagtacttaatagctccact  
caaggagtttgaactcggagaagcctctctaccttcaaatcaaaagaaccaatatacaagataattccagctctgatatacattcattcca  
aatggtctcaacaaagttcaggaaagttaaaacgcataactaactcctccgaacatataaactattgaaagaatttgtaaagcttcaaatg  
tgaatacagaatctgtgacgaggaaaatgtacgctgtttgaaagtgaacattcatccaactaacccgcaatagatgttacattcgtgcatcct  
caagaaggacttaacaaaatgtagattacttaataggctggattcttacttctcaagaacagtttgaccatcgcaagaagaatctcttttg  
tgttgagcagttcccaactgtgaatataaattttttgctaaaagccgatcatccttatttaaaatgctttgcaaccctcaggttcgtaaac  
cacgatgaatttaaaagatcatgtttcttactttcataccatgataataaccaatgcttataaggtcttccctgggtgtataataactca  
agaaaagaaaattcttcaatataaaattcactttttagctctcacgatgaaagttgttaagtaacttctcatcggtgctcctgataacaag  
atgaaatttttagtgaagagaggattagacacattcgcagctcggctcagcatatccttctcagaatggaataaaaaatcagctgaagga  
aatcaaatgtttcacaagtgagagatccttgaaaaggttcagaagctaaaaaataaccagtaccattactcattctgatgtgaatgatactaa  
agagaaggtgaataaaaacgatcaaccatatagaatgaaaaagtaagagcaggcctccgaaatacaattcaagcttccccgcgcctact  
gattcttcaatagtcagtcagtcagattcagatgagctgttctcgtcgtcagtcgaatgctggaacgacggcaatgaaataatgtctcaacca

aaaaaccgcaagcaacaatcaagtacttttgtctgttcttccctccggcaactttggataagctctccttgaatgatctccccctcaaaaacag  
tggaagggttttcttggctctactaatccggttttagttgtgtattcgaatctctgtcttgccttaacaaggataattgttctaacagttaga  
aatcatgaagaattcgacaacaaaatcaaaagtattatacatgacctctgaaaaggtaacagttccttttttaactaaaaatatta  
cttgatttagttgcatgttctgcagtcattttcaggagaaatacacatgtctttaaagatagaatatgatagtgtttttactaatgagtttga  
gaattggaaaaatactttatccaaatttgaaccagagatatcaattttctcaaagtctgtctcgctttataaaaaagatgattacctaatac  
attatttgcgaactggtaattataattataggaaaaattgctaatcgcattagcattacaattcagttgaagaaatcaatcacttctgaaaag  
gcctgtaattattcgatatagtcattctgaaatttctatgatcttgcgaaacctgaggctgtggaaacaaatgattacttttattccatggaactgt  
taggaatgaaaatagaagaaggagaaaattttttaagtccttcttatgagatgtaaccttagctacaggaatgtgtttctcgaagctcgtg  
atgcaatcacggtttgtaatatcaatttctgtctatgtaagtttctatttttaaccaggctaagtctcatttttaggccttgggatgctgccttaga  
gcttcatgcatggaccgtgttagataatccggtattgaaaatgtttataagtccttatgtttccggtagctcagttgaaaacaaagatgatacaa  
tggtggctaattgaaaaggaaatgaggaaaatgactgttttaagcttacaatgtggataataaagtactatactgtcgggtcagcgaattca  
ggaaaattcagtagctgttaacaaggacgtacttccgagctactgatttttgtgaagtacttaagattaaggatttgagatctattcttctat  
aaaagatccttttccagtagctgtgtgtaacaaactgagaacgcagattttctacaaattatacggtaaaaatagagagtccttcatgca  
ctctcaattgacatacaaaatttatcaggccaaccgaaacggcaaaagtgaggacttgagtaatcctcaatttctggagggtgcaatgatagaga  
actcccaggattggtacactgcagcaaaagattctgtaaaaacattagacagcattaacacaatatgtaactcaatcagcagtcctttagtct  
acattacttattccgataacccaatcttataaaacagtgtaataaaatattgacgaatgaactcactcattcttctccagatcttcaatcttct  
tttaagacgctgaaactgattaataatgcttttccattctgttctgccccaaaattaacctgcaataacccaattcacgatcaacttttgcgaa  
accttctgataatcttctcaactatcttctcactgaagacgtgaatataatgcttagtatatctaagatagaataaccgacaggcaaat  
cttagaagaaccggaactcgtccgagagctttaaagtataggacaagcatcagaccaagcatcctgacaaaatcaagagtcctggaataaac  
ggaaccatatttgaatcgaattgaggattatcaactaggtcatgtttgtcggcactaaagagtgaagatacgaacgaactcggcgtcct  
cagaagatcaaatgtgggtgtaccactatgttgttccatataaggataatcaaatgaatagcggatcagcagcttctgactgacggttgg  
atcaagccataatgtaaaaactcactgcagacgcttatatgacgaattaaatgagggtggatttttagaaaaacggacgttctttaaactgat  
gctgtatcagaactccaaccaagtaactagagaagcattccaagcttttccagtgagagaaatcacagaaggattcagattattcggca  
agcttttagatgagtgaaagataaccgagttgagtcatttctgatagaaggagtgatagcgtcattcctgaatgggtatacagaacataatcc  
aacattgggctctaaaagattgggtctatggtgaacatgacttttacgaaaaatggtatagactttctgcacttgagctgattcatctagaatc  
agagggtccgtaaccttctgtaacaacgacgttgacattgtcaacaatccaggatgagacaaaacataatgcgatagtttgcagcagattctagt  
aaaccgttagtaaaactccacaatactagacaaactgtcttggagaagcattatggtgcttaagcatccaattagatgtgaaaattgcgcag  
gtcttctgcatcatgtgtaaaactcttctttcaattgtagcttgcgtaggtaaaacaaagactaaagatgtattagattcaattattagatattttg  
cttagcttacttttgatcgaaaactcgtgtctgtaaaattgtttggcaatgtttcagatttgccaacttgagttttgttctgggataggttaataat  
actgttctaaagtttctacataaaatcggctcttttagccttcttcttggattttccattataaaatattagcttctatgcgagtcgctat  
ggtagtaagtaactacacaccagagactacgggtatgttctgtaacaagtcaagtggaataaaagcatagacgactattgcaatttaatta  
tccagcatattattgctattatacagtcaaaataaatatgagaaaatcaatccactaatattcagtaggaaatttcaattagttgcatcgtttt  
ctgttgaaacgcaaaaatcaaacgcattttgaaattgctgctttcaagctccaaactagacagcctcgtgggtgtgctaataattcgatatttg  
tacagctagtaatagagacagttttgataattcttttgttgtttgatgttcttgcagtttctgattaatcgcttgaacttgaagagtttaactt  
gtaagctttcaaatctcatgtttttcaaaatcttggtaaagggtgtagctaaaaacgaggcttgatcagttactgctcaagtggttaaagttagt  
gatatactagaagtaatgaaattccgagacaacttaaaaataaaagcaagattgtaaacgagaacggaagattgccaagaatcaggagca  
ggatgtacaactttctcataatcattatcaacacactagtttcatcaaagtttgttcttcaattcaaacagaggattaagtcgacactattg  
actattccatgccagttgaaatgattgaaacgggttgccttaagcattgttcttcttattaggattaatgtaccgcaaggaatcaatttagtta  
gcaaaagcgcgcttaagaacatacaagatgttactgaatacaaaccttagttgggacaagataggacacatttgggggtgggaattggaagt  
ttaagagatgtaaagttgagcattttcatacacagatttaagtctccagcaaatgtcaacggaagaagttggataatgaccttgaataataca  
acctcaccactctcaaaaagaacaaacagattcagtttccggatgaccattaacatgccccaaacttaagagatatttaggtggtccaaca  
cggatgagttccatcctgtttcaaggaagaaacaaggttagggacaataggacgtccataccaccatctgagggtggattgaaagagtg  
aagaactgatccaagtatactccttggccaaggaaatcgggactagagaaggaaggcagtttgcttataaaaattggaagggctgataca  
aggattagaactttccgatgataagaaggacattcaattgttcaaattgctgggaatccaggagctgtaaccgacgatgtgggacgatga  
cttcaaggaaggaaggtcgtcaatctttagactacacagagatggcaaaggagacaaaatcattggcacggaagctttgcgccagattc  
aatgactgtgtaacataaaagaataggagcagctgaaaaatgggaagccagcttcaattcaaaatcgaagacctggcaactaacatt  
tgctgaatctagagaagttgaaaacaaaaaacttattaagcgtcacttactaggtggatctgtgccaataagccgaaatggggctaaccttga  
taagtctgattaataaaagattcagagacaagcataaaaaatcgtggttttaagttggaacattggatgatgataattgagaagaaggagaa

gtttaaataatttaaaagtttcacaaataaaagtaagttgcaggaaattcaaggaggaggcttctggatttaaaggaatagttgatttcgg  
cagtaagagtacaaaaggagcttccgggacgcaaaactgaaaggggcttttggtacaagcgttaattgagaaccaaatttaaaagtaaaatctga  
gactgaaaatggcggccaacaaaaagttgctgagcatctgcagattgtattcacgtttccttggtaacgccttaaacgtgctgtgtagatt  
taggaatggatgtattgacttggccagggacagttgcagagtgcatgaggagaagaacgggggattggaaggaaagggtagatcaaaagt  
tgtgaggaaggaacgaaagaggacatattttctagggaaaggaatcacgaaagatgggaacttgcaatccacaagaagtacagtttga  
ttacctgattgtatccgagacagttaaggagaaagagtcgtccacaaggtcgaggcagacaagagggtcctgagtatttgaagagtagataa  
tcaaaggacgcatcagacgactcaaacgaggcatcgagcttgaagaggcaggagacgaagaagaagaattatcggaagagagataatgg  
acggatgttcttgaaatggggagaagtgtggaagagctgtcaaggaagctgataattgaaggagttcatcaatgcaagaaaagcgaaggc  
gcggagggggcagaacaatcgtcttcgcggttagataagaaggatagatgatgaagcggtatcacgcacaaattcaaggagcatacgcct  
ctggagaatacagacgaaagcaagacgaggatagcaaaagggcaaaaggaagagatggagcaagggaagaggaagtggagtctgttag  
caaggggatgatctatgaagaattagtcgagaaaagaattgaaagataggaaaagaaaaggagcgtactgtatattcgagctgtaaattg  
gaggtaaacttaggaagccaagtaccacgagttcaagttgtaaagaatgaaatccgggtgtcgtgaagaagcagaggaacatgaagaaaa  
aaccggaggaatggcaaatatgccattgtccataaaaaaagaataagaaaccaaactaagtagaaaaagaaaatagacacagtaaag  
tatgggagattgggaaaaggaaaagaatcgatagtcagaaggatagagtaaacaagaaggaagacaaaaataacaatgaaaaacagc  
caaaaaaagaatgaatgaagaaaacttatttgaataaaaactgtgtatattgcaggaaaatccagtgttatacgtaaaaggataaacac  
gatgcaggatgaaaccacacaactgtactcgataaaggagagtaattgttctactcagtttctgtttgctaaacaaagacaaaaacatctc  
gagccagattcgaactagcgaccaaccggtatcttgaattacagccgggtgtgataaccaactacaccatcgagagaattgttagtagtaac  
tatgctttatacaatattagaataaagccaactttagatagatattggtttatattgagtgcaaggggataaattgccgataatcggacaaacg  
acttttgaattctatttctctgatgtttatttctgtcttagacgttcttattcttccagccttttcttttctgttactccttatcttcatatt  
tccgtgactgtttgaaactgcgatccctatcaaaaactctatgtagcacctaaccgaaaggcggtactactatccatccatgtaattggggaagt  
gcatcatcgcgtcacagtttaataatcataaaaaatctatgaaattttaaaaaaactatttattcaacggtacttatttactcctttctttt  
tttggaatcgaggtttcgttggcttttatataagtcgtaccgtaacatthaatcgtgtctatgaacaactttatccatgtttcatatacctatc  
agtccaaaattcgtccgtcgataacgatcggaaatgacgtcagttccattgatatcgaattgaaccctcaagctagagataagctttttgg  
gcgtacaagtctagacgctcgtatccctggtgtcgccagaaggggtcaccttccaatgaatcatcccaggtttgtctagctttgcaatctc  
ggacgcgtcttttaggtcctgtggcccgatttctctattaagagtcctccccacacagcatacctcaaacaccacacaattttacaaatcca  
tttcaaattagaagacaagatactatctatttctgataaagattcattcattgattctttctgtatatttctgtaagctttataagaaaacgacgact  
gcaattcgtgtgtttctccttctgtattttgtttgtttatgaattttgtctgtcgttgccaaaatgtgtactaaattgtaatacgtgaatc  
gtattgttaactcctgttggatttaattgatcgtcgtttttgtgtgttccctatgtttgttgagaaaattatcgcttattggttttgggtcttttt  
tataaaaaaaagagaatttctgtttgtttgtaaatatgttcttaaggttttcgagtaaggttatttctgtcattgggtccatccctttataat  
agtctctataagaatcggctcttccggttttcttttgcctttataagttattttctatttctatttccagatatcctgtggcttaattccatctttca  
agatgtctcgggtttttctatataatttgataaaccgtgctttctgttttatataataaaaaaacaagaatgtctcgttgggtttatttctattct  
aactgatacccgctgaaaatcgttcagtaccccttatcgtatactatacactattgtgtttgttctgtgtcaagttttgtataatcgtttatt  
ttttgagtttaactcatgaattactctctcagcgatctcagttccctttggcaatctctcctcatcattggccgaagggttttccaggttcaat  
gccccctgtcactattcttctgtaattacctcctctcatcttctgatgatgcctttttcttttctcgcagaatcattcaccttctcagaaaatga  
cgagtccaacgaccttatttctgatcctgagctaatgtcaacctttatcggatccttcatcgtcccttaatacatcaaaaaatataactcaaa  
agtctgctcggcaaacgcttctcaacctaaaccagcttcttctcgttggagttctatcccagtcaccagtcacttaacagcttacctcta  
ctgctaagcctcgtaaaaacttcttctataattctcattgtggagtggaaacttagctgctggttccatcgcataacgatgtctttccgctc  
aaaacagtttattatccgagcccacacccccattcaccttctcctacgagctcgttttttagaaacaccattacatggatcctcggacctt  
gatttagtttgggtgataaccagatgccttttccctcctccgatggtgactgtcagcgcgttttagttctatatcttacctcaacagcaatgatt  
ataagctggcaaatgtaggtttcaatcttcgagaataaaagacctgcatatgattctccttctgatagcctgactcaagtttgcgaacagaag  
aaagcaatagtttctgattattcagcggcgtgtcttccatggagcccttctttctatgaagcattcggcgaagcttcaaaaaataactgtcg  
gcgacacctaattctttaccacgacagttgtggtgaaagtccttgacttctcaaggaagtctgcttaccactggcttctgtgtcctcggc  
tccgtctaggacacctgtaccagctactaagcttgcgagtggtgaaagcctaaagagctcgcaacataatgcttcaattgtggtgctacaca  
aacaccttggcgcgagaaccgccgataagcaccattattatgtaatgatgtggtctgtataccaagcaataggagtgatgagaccattggc  
tccgaaaaaacaagcaatcaaaaaggtcctgagaatcttacgtcgcctaattgagtgctacaagacttctgtggcgtaaagaccgctg  
ggacagactgtttgtaatgatcgggattgtatgctcgtctccatggccacaatcgaccctgggcttgaagaacaagtaatacgtcagcgt  
cgtggaagattatgtgatgaaagtcaccctcggattctgtgaagtcggatgaatctcctgagctttctcaatctatctatcctccgaattacatga  
ctcaagttctgaaagcagcctatgtcattgttccgaaaaatgatggaaagcatgttctgctgtaaaagcagaaccagaagcatcgttttct

gcttccttataatcacctttttgtataggaactatcagtgattggctgctatgggtcgggtctgtttgctgcatttttgggatataatcataaaggat  
tcggaaaaaaaaattgtacgcatgagaggatcagctaaattttggtagctgtgaaatatacaggcaatcctcttgatttcccttggttcaacctaa  
gggtttttggttatataatatttatttttttaattagatatactaatcgtgtagattattatgcaaaaaactgaaagggaaagttaacgt  
ttcgggttttggtagcactcgaagctcaaaagaaaccccttttgggttactattgggttactatcttttctcatttaaaagtccttttttcttgg  
tttttttagtaattgattttttccgaatctaaactcggatttttaaaagacatagtagtagtgcgatatgaagataaaagtaaatggttta  
atctgacagcgattgagttcaatcaaatccttgaatatactgccttgaatatttgggttacagatgaaggttccctcgaatggttagatgattc  
aaagtttattgattttttcatagttgtttggctatgtgggcaaacatttacgttgcaaaagtaaccaacgatgtgggtgatttatggaggtattac  
tgggaagattcatttgagcttatattaattggtagatgtagcttgggttattctatatacaataaacatccagctggttctggttagcatagagaatt  
ttgtttttgctaattgatttttcccttgtatgtcaaaagagaagagtcagaaggttgtagttttactgctaattagtttctgatattgtgaaaaa  
aatgataggaaggatcctgtataaaaactaccgtcaaaacggatagtaacatagattattaacgaacaagtctaatgtttgacagctcc  
cagagctttaaggcagtgtaataataggttgccttgcgtgtaatactgcaaaccaaggataggaataagagttgctcgattatagtgcttgt  
cgttgaaggaacatcagtggttcagaaatgacatccttcatttcagggaattcttcacgaagaattttacaacgctgtagtgataaaggac  
ctttggatacaagcatacaccattcatttccgggctttcaattgcaacgacatgagcattggcaatgtcacgaacatcaactgtacgtgtg  
gaaagaaggctgcgcttggaaaccattgataggctccatagaagacgattagaagcattcaaggattccatagcttccataggatggattgggg  
gtccaatcacciaagatgggttcacggtgcacatatcataatgaggctgcctctcctaacaagttacgagcagctatttcagcaacttttag  
aagcacaataagcagcgaaccatttttagtcttaaaagcctcctcatagcttatgggattccagctttttcagtataagtagagccagagtagg  
gtctttcataaagtcgcatagcaacaaggaagaagtaataaccacacgttttaccttgggtcgttcaaggaagcctcacaatattgattgt  
accctatgagcaggatccaaaagttgggtcttattgtcggttacattttcataaaagaaaggagaagcaacatggcaaatataatcgatccttg  
aacggcatccttgaacgcgtaggagcgaacaatgtctttaacaatacaaaactcaactttgtctttaagctcaggattcaggccgacaagttctca  
gcttttccatggaaacgaacggcaccctgcacgataaccattgtaaccaatgtaacagcaacatgagaaccgatgaaccagtaacgccaag  
ttactagaacaagacttgggtcggcatgattcttataatggtaaaagaaacaaataaaagtaacacactcaataaaacaaaaaaaaaaaaa  
aagggggaaaaggaaaaaaaaaaaaaattaaaacttgcagtagttccttcttgtataaacagatttagtttagttccaccaagtcagaacaga  
atgtaatgtaaaaaataaaagaatatcaaaaaagaaacctccagcagccaatctctaattatagtcatttactttctgtttagtaacatcat  
actagccttcttgacgcaaccacttgactgttcggtataaactattccgttattctaagaggtactcttataaaagttttctctatttcttggcc  
tcgttgttcttcttcttggcagtagcaatattccgacttgattcgtaaagtaaaaaactaagagcattttataaggaaagataaagcataca  
tacataaataagaactgttgggttcccttagtagtcttcttcttcttcttcttggcttgggttccagtagtatcacatataatcgatlaacga  
gttggctgtcgtcttaatggcagcattgtttgctttaggaagaataaacagagaaatagaagtaaacagtagcgaatcaactttgtacg  
taagatttttagtaactattgaaatgggcaaaaaataaaaaacaaaagtcagtgctatttttactgtagtagatcgttcggtaatgtatg  
gtttgtataaacatttttggtaaataggtttatgaattttcatagaactcgagaacaatcagaatctgcttttacgggagccttgaggaaa  
actgtagaacgaagcaatgaagtagcgtgcaccttgggcattttaacttttgttggctattttgaaatcaagaaaaataaacacaaaagg  
gaaatataaaacaaacgaacgatagaaaaacagtggttaataagttagaagcgttgaatgtgtagaacataaaagacaaacaaaaga  
atatttcaaagagggaattaataatggtagcttgcagcctttgttgacatagtagcaacctgcgtaacaagtcgacgaatttggacggtaaag  
ttatttttttattacaatcaatacttttaggtttaacatttttacttaccattgaaactcgaatatcaatacaaaacaaataagtaggcttct  
aattgtcttcatgcttctcatgctatattgtgtcccaaatgacatactcctgatccttaaaacttttttaagcagtaaaatcaataaggaata  
aaaatagatttagcattgaaatctttgaattttcattcttaagtagaatgaaatataatgaaatgttgatcggcctattagatctatgtagaagaa  
aaaaaggctaacattggaatacttttgggttcaatacgggcttctaccgttcaacagaatagaggcagatggttctgaacgcttaagatag  
tgtctagttgtacaagaattaaaccagatgttctattcctgtaaaataacaaataaaggatattatggaatcctcgagtttggaaatgatgaaata  
ataaaaaaaaggaaaattgaagaaaaagttcaatagagcaagactcaaaactggttgacaattcaaaaacttagaaacaagaaaagaat  
aaatataatctctaaaagccttatagatgatcgaatcctcgaatcgtaaccttgacatgttctttcaaaaagttgacgaccggtcagttct  
ttcagaatgccttccgtgcattaggttagaagtagcattcaatgcttcggaagcttttcttcttcttaccgaatttcttctctccagata  
tcaaatccttcttccattcatgaacgattcaactgtcacgggggtaccctggaattttcgttctccagttcaatttcacgattttgaaatcttcaa  
tttcttttcttctttcacactgttcagaaagaacgatatttaccttctttagtatggagcaaaagagaaagatcatggccatgcccaagcatt  
cttgcgctacagggtgataggttagttaacgaaaaacaaaggaaggaaggaatcatttaattatcagaacccccagctacttactattgat  
tgacgaccttggagagcgttcaattgtcttctccaagcaacgatgaggcggactaaagcggattttgtgtcagggttcttaggatattc  
atcgcttaaggttgcgataaaaatgacggaggctacattgtgggttagcaaggaaggtataccaacctccattcagaaaaggaatccatacga  
gggtctgagcatttagattctcgggtctattgtttgagtagctgaaacgttcttcatcaaacctgttctgtagcttctcagttcatacga  
cccataaatttgaatttccggttttcatataaaaacgatcccaccggagccaatagaatgatatttcttttctacttactggaattcatctg  
gataaatggactcaaaatcttcttcttcaatagctgaactcattgttctgatgggaaatgttcccgtaaggtatattcataaaggtt

acgacgtacttcacttttcgcaacatgggagatagaataactagaataataaagagtaaacgacaaaaaatgattaataataataaaaa  
atagaaatctactaccttcgaaatcaagcgatgtgaattgtatccatttcatcttctgcaaactgtagctcaaaacgatattataggatagttgtta  
caacgaaaatggtttacgataaaatacgtatataccttcaatttcttcttctgctgcttggctctataacatggcactttctctttgttt  
attcaatttcatgtaacacatgtgtaagataaggcttattaagcataatttctgcatgaaatcttctacggccacacctaaggcgaaaaacaccagtt  
cccgtccgaacactgcagtttaagtgaatgtctgagggctctcgtctcgttcatactatggttggagacaacatgggaattcgggggtgtgctgg  
cttctttttctctttttcttttatacgtcgactattcccgtaatgttttctgaaagaatcttctgcaagctgttctttacaagtgacaaaagac  
taattacaagttcaatgaaaagaatgaaacgatcgtattcaattgcaattaagaataagaataataggaataataataaagaacctagat  
gatgcaatgatctcagattacgggtcctttcaatgcgaggattgtatgcatgcctttctattgtccactttctcgccattccaattcatgttggtac  
aaggatgagtcgtagtcaaaataaacacaagaacgcttagcaaaaggatataataaatacttaccgaaacaaattgcttgaatgttatcttt  
ttccacttagtgactttcgatcggaagagtttaagactcatgagaaaagaaaggtaacaaattagcattaactttgagttgtaggattgcttgca  
gctctatttctcgttcgtagttgnnnnnnnnnnnnnnnnnnnnnnnnnnnnnnnnnnnnnnnnnnnnnnnnnnnnnnnnnnnnnnnnn  
nnnnnnnnnnnnnnnnnnnnnnnnnnnnnnnnnnnaatcgtttctgaaagaatcttctgcaagctgttctttacaagtgac  
aaaagactaattacaagttcaatgaaaagaatgaaacgatcgtattcaattgcaattaagaataagaataataggaataataataaaga  
cctagatgatgccaatgatctcagattacgggtcctttcaatgcgaggattgtatgcatgcctttctattgtccactttctcgccattccaattcat  
gttggtacaaggatgagtcgtagtcaaaataaacacaagaacgcttagcaaaaggatataataaatacttaccgaaacaaattgcttgaat  
gttatcttttccacttagtgactttcgatcggaagagtttaagactcatgagaaaagaaaggtaacaaattagcattaactttgagttgtaggatt  
gctttgcagctctatttctcgttcgtagttgtcggcggaggagctagtgcatcatccctttgttgatatctgggaagcgtaggcgaaccgggtgtttc  
agctgagctctcaaatctcattcaaggcaaaaacagtaattgtataaattccccaaaagatagaccaacgaacatccaagcacttcaccaa  
gaccaaccagataaagattataacttttagcggcaatccgtattgtcaatgaaaggccaaataagtgttaggctttattagtaacacacacac  
attctaatagctttgtctattaacaacaatgctccacttaccatagaaaagagcaagaatattgccatatacaagccaaatgcctaaaggctc  
caagaaggccaaactgtatccatttccatataactgtttcagaaaagaaatagttcgaacgataggagattgctaattgacaaaggaat  
gataaaccaatatcaaaaagaaaacatcgacttacttttaacgactacattttcagggaaataatgatctgtcttctcctaaagtgcgtaag  
aatcattgaagctatcaaatcagtaattatcgtttttgtttgtttggctttgacagaagttgaattggaagttttgtttatgtctttgggtgata  
caaaggaagtccttctcaaggtcaacattgaaacattagcatggttgaagcaggagggtcgttgaatcgaatttcagctcctttccgacatc  
taaaacaataaagagaatctcaacgaataattagcaaaagagagctcaataaagctatcgatccgtattcgataaaaaatttcgaaatg  
ttcagaagccactaagaaaggcgaattgaaagggtttagctcaaagtagactcaattcaatattcatctaaaatagctcagactttaatcaa  
aatcagcccagttggcaggaattgaagaaataaacagttggctccagcaggaaatctcgatctcttacgcaacattttagctcaggatagtgat  
atgttcagttgcgctatctctataatgacataatagcataaactggtgaatatacgtttaagtcaaatgaacaagtaacaagtttcgctaactcg  
cgtttgtttacacctgtgaaacaaagcagatccatttctatgaacttatgaacaatcttttaacctgaaagtgagtaacagcctacaaccaa  
aagcagccctcatgggctctcaggatcaannnnnnnnnnnnnnnnnnnnnnnnnnnnnnnnnnnnnnnnnnnnnnnnnnnnnnnnnnnnnn  
nnnnnnnnnnnnnnnnnnnnnnnnnnnnnnnnnnnnnnnnnnnnnnnnnnnnnnnnnnnnnnnnnnnnnnnnnnnnnnnnnnnnnnnn  
agctcaaagtagactcaattcaatattcatctaaaatagctcagactttaatcaaatcagcccagttggcaggaattgaagaaataaacagtt  
ggctccagcaggaatctcgatctcttacgcaacattttagctcaggatagtgatagttcagttgcgctatctctataatgacataatagcata  
atcgttgaatatacgtttaagtcaaatgaacaagtaacaagtttcgctaactcgcgctttgtttacacctgtgaaacaaagcagatccatttctc  
tatgaacttatgaacaatctttaccttgaagtgagtaacagcctacaacaaaagcagccctcatgggctcttcaggatcaaaaaacctata  
aattacttctttgagctgaaggaactgtctacggccatacctaggtgaaaacaccagttcccgtccgatcactgcagtttaagtaaaacgtctgag  
ggtctcgttcatactatggttggagacaacatgggaattcgggggtgttaggctcctctactttttgtgctctttttctgatcactcactgttcg  
agtgcttcataaaagctagtaactcgagactccaagatttattgttttgagagcatactttacatcagcgtatcattttacatatct  
tgcttagtataacgactgctttgggtggttagtggtataatgcttctggtccatcgaagcagccgggttcgattcccggccgaagcaattcttttc  
attcaactgaatttgactaaaaaacacattaattctttcgattttttttgttttagtaacaaactgctaccagttcagtaacataaaaa  
ttatgaaacaaagcagaacttatggtattaatggtgttctcaaaagaaacagttcaatctgaagcagaataagtagggtgaatcgttggtc  
tctatcgtcttaggtttctagtagtctatattaaattttctgtttgcatcctggttcaaaactgctgcagcgtctatttcatctctgtaatta  
caaaccaaatccttgaagagctttatagaaaaataatggatggcagagattggtattataaatcaattacaagactgtccagctggga  
aaaaagttcgtttctgggatacgttacggcttatgatggaatttatgtctcaagatggattgagtaggtgaatcgcgactgaccgcccgt  
cttgcaaatgtaagattcaaccagagaatggttggatattgtaggtcgtaaatgctcagatggaaagatcgatgactgttagtgcttcagta  
gtaggaattgatccaaagatagaaaaacacttcaatggcgacaggaattgcatctgaatgggattccctttaaactgctccccatcttcaatt  
ttgtaactgttccgagctgggtcaggtcaaagtacagaaatgaacactataagcgttgattgttatttcaatataataactttgctcatg  
aaggagggaacctataaaaataaaaaataaaaaaaattggatgactcaatgaatacctaattgattctaagtatatataactaa



taacaactaaatTTTaaagaacgaacaatgcaaggaattatcaataatTTTggaaagcccggtaggcatcagaagggtggctatccgTTTTa  
agcccagatcTTTTcatcgcgacatggaccactTTTgtaattTTgagacctgagactgggtatTTTggtactgacagtgtccgggcaaacagaa  
aatccccaaaaaggtaccgcaaaaaagaacaataacatagccattgtagtacatagccaaaagcatggcaatataagtaactatgaatt  
ggacaatgtagaagcaggagcgtataaagtgaagacatacacgggtgaaccagctaaagccgctaggagaagaagcgacgaaggagctTTTca  
ggagaatgagggcatgaagagttaagctgatctcgagaatgtcgaatacaccaacggctgaattcacgggtgaagcgacgaatgagttccaga  
gccatcatcataaaaaatgataccaaaaatacttccaacaaacataactcttgctactgtatagccagtgTTTgctgataaagcaagcatcaattgtg  
taccagttccaatacatggaggTTTTacaggaagcaccgggtgaagaagcagtagaagagctagaagtagtggagttcgtcatattcgacattcc  
accatagtcgtgctactcattTTTggaggctcctcTTTggaaaagctcaacagcagaagcatcTTTTcaggatccaacaacgattTTTgaattTTTgtt  
tcaagctccgctaactaattaaggaattaccaggtTTTTctTTTggctgctgaatcaacgacatatcaattaacaatgaagcaaaaaagca  
aagggaaattggaattaataaagaggatgaaaagcactgaatgtgatatgaagaaaggaaattaataaagggaggaaaaataaacaag  
ttaatTTTTatcTTTgaaaggatTTTTTTTTTaaaaaaaagagtagaaaaaaaacgaatcaaaaaccgaaaaaagctgagaatcctc  
aattctactaaaaggaattTTTgacgactTTTaaagcctaaggcagcttactTTTggctTTTctTTTctgattcgtaaacaagctcctcaaatccctTT  
gttgaatcaaatggtgTTaccgatggtaaacagagaaatgaaggaagaagaccgtataataccaaaaaccacattgaggatTTTTgatgTT  
tccactaaaaaatgtctcaaggaagcacaattgtctgattgttacatcgataaccgtgcgctgctactcgtaaacttagcgagtcgcttatac  
taactgtaaatgaaacgggctaaatgatgtgaacaaatgcatgagtgagtagtatagacacaaaaaggataataaaagaacaacgatga  
gaaagaatataataaataaacctgatcaaacccatcatgtccttTTTcacgatacataggattatgagactcctggatgaccagagggtcatt  
ctagctcgtctcattcacaatTTTTattataacagttactctcacaatTTTTatacagaataaaggaatacaatccatgtaagctcaaaaaatg  
gaaaaattTaaaaataatggtcacagccaggctcgaactggcgacattcgacttattagatcgacatgataaccaactacatcatcgaccatta  
attgTaaaaggagaatgataactaatatgTTcTaaagtatgaagctgaaatTactgagctggtaggcttctgcaatgtagagttTcca  
ctagatacacaagaaaaattacaatcctaataaaggccaactgatgaatcaagtgagaatgcaaaaaattgggctgTTctgggaatcgaa  
cccaggaccacatcacctaagatggtatcataccactagaccaaaccggccaattctagtaggatataagttataacttataagatgTTgga  
catacgaactTTTctcctcgacgagctccttagttcactTTTctcctgtaagtataTTTTattattactTTTTTTTTcttcaaccattggctTTTT  
aaataccggtagcgtggatgaattgctTTTaaacaatgataatctatgctTTTatgctTTTcaagaatgTTTctcaggctgTTccccTTTTctaa  
accgtaacaaaagtgaaatggaagcaattaactaagttctcggctggatgatgTTTTctgTTTTctTTTTTacaatacgtTTTTctTTTtagtgaca  
gttcaaccagtaggactTTtagactaacgaaagTTgattTTTtagtacaggTTTcattTTTgtTTTgcaattcctcaaaaggacttcatgattgat  
tatTTTTgtgTaaagtaattaataaaaaaaaagaaaaaactgaagataggaaaacgtctataaaagtataataaaaactgtgaaaa  
ggtgaaaaaaaattgctTcgccgggaatcgaaccgggtcgtcctgatggcaacgaagcattataccactaaaccaccaaagcagtcgtt  
gtTTTTctgTcacgTTaagacataatTaaactgtaatatTTTTgcTTTaaagagtcaactagagagaaaagttcctactactTTTTctTTctacagt  
ctTTggTaaactgacaaaacgcgTaaatccaaggtaaagattTctgaaagaattTcaaaagagtcataaggtgctTTTgcatctataataaaaatt  
tatcaacctagaattggtggaagaggcaaaaattacatgctcgtgaaaccgattTTTgaaTTTgaaagcagtcactcaaaactggtatTTTTgat  
TgcattaattatTTTaatatgTTTcattTTTataaaagcagagctggatgCGGcaagggatccttatgcagatccgaaacataaatcgcttatccaa  
agatgCGGatccTaaacgaccagaggtccattaggaacaaaaatcgctgaaatggatgcttctgcagatgtctactataatccaccagcatcct  
cgccggacacccgaaatcacaccgctgTTatttgcataatgatgctccatcaacagaagaacgggagacattagcagagaaaatcaaagattcact  
tTctccagttgTTTccagaaaagcTaaatcaaagggaaacTtctgTTTTcgTTTaatcactTgtcagatgaagaaaagaatgcaattcacgacct  
gcggtTgtcgatcccaacgagTggacgaccggagctcgtcaaaaaagTTTcgagccactcgtTTTaatTctaggattTgTgaagctcccaaa  
gaacgcctggcagcggTggaagaggaactggaccagcaaaaactcattggggaaaggcgaacgccaagttcgagagaaaaagctTTTctcg  
aaataactTctgTTTcagagcgtgTTTccaaaattataactTTTgTTTtaggtcataatggactgattgatctatcaagatgattTgtatacctcTc  
atgattgTTTTgTTTatcaacaagaattcatctatatatcagTaaagtatgctTcaatagattTctTTTtagcgaattctcagagtcacaaaccaa  
aattactcaagctgactTTTctTTTtataaaaaccccccaataatctactgaagtgcgatgaataaaaactaaactTtaactcacaagacatt  
TaaaacggaaaaattaaaaactTaatccaaggattTTTatcTaatagattTgTTTTtatattactTTTTgaccaaaaaactcTaaactcTc  
ttacaatgTTTTaatgattctacatcacatggtatattgacatctcaaaactgctTTTTcgagttatccgcaccgtcctgaattgtataaaatg  
atgatcaacaacactgtagagTctaaacaaagttatgccacacgatggcaagTTTTgggatcaacgaaattaatcattctgaggaatattca  
aaagaagcaaaagagaataaggatcTtTTTctcctcctcogtatcatcgTtaattTgtTctccctgTTcaataaccattcagcgggatctggca  
aagtacatcagcagatgcaagctgtagcaggtggtctaaagaatgatttagctacgagaatgatctatgaattcaataagttacgTTTT  
cctTggcTaaactctattattcattTTTgtatgaaataaacgtatagcaatggtgctactatataaggaagcggTcgtcgagaatgTTggtacatat  
attccttataataaaaactTgagTgtgagTcaattgtaatttatcgaaattgactaggtTgctattgaaactactattgagttactggtacTTTTcat  
aagTaaaagcaattatcagacaaagaattcacgaatctacataatataccaatcgaaacTtTcctactgaaagataaatcagttcaattTcct  
TTTTTTTTcatgatggacagacgtgTaaagattggcggtatagTggctgctggTgcagctgTTgcttacaatgTTTaatcgcaataaagaaccta

aaaacaaattggggaagacaaatgcagactttatgaataccattgaacaagaaggcccgctttgatcgtgctgtaggcgacactgcagataa  
ggccaaaacattgtacagatagctgtagacaaggctgcaaacgaactagaaaagcctcgtgaacaaccgaggattacagagagatgcaaa  
gacaaaaacagaagacctttgcattctccaagaaaaaatgaatccaaatggttttaagtcgaaactgcgcatctcgaaagggaccgactg  
atgttgatgatgacatcttccaatccgtagcactgcgactcaagatttcgtattgatacttctgttatgctttatggtttatgtcattatgttaa  
tacggctacttttagatcaacatattgagtagtggtccaagttagccaacaatgtaatttttagtctacattcaaaacaaacaacaattgt  
gtattgtccattgtagtttagtaactgtactattattcggttataaaatgtacgaaaggatcctttgagtataataccgagtaactgtcttca  
aaaaggaattgttacattagtagtactttaatgcaagatatgaaattcagggaaactgattttctgattcttcagctctgccttatacttgc  
ccgatttcccttctaatagctaaatgaattctattcaactgtacagtaatacgttagcataggaatcgtactgaaagatgaatacgttcagatga  
aataagcaaaatagtgctgtattgtgacattagagcttattgacttgaattgtctaacagtactattatcatcactgaatcgttgaattaagt  
gcataacaaaagttgttctgaccagtaataatgactgcaaaacagaagacaatattactattctaattgttccaaaatcactcattcatg  
aagcgcatttaataatgcaattctcaagcattctcaaaatgcgcttcatgactttatttctgtcttgatttaagtaacaacgtaaatctatact  
ctgtagtattatggatgttaaagaaagtacaataatattataaattcctttgacttatgaattgtcgcggtgtagggcagatattacatcgtata  
atatgtaaatcgagtggatgaacaactctagctgcatgtaatatgctgattgaacgcttactactgctttatagtagctactgttgaaggaa  
ctgattagattaactaaatgagacgcttgaagacagcttagtctcatttagtcagaccgatcaaatctccaatctggctgtaaatgatgcgat  
atagctctttgaaatagcgaacgtaaatgcttttttaaatggttccaatgtgctcaggctccttatctcataaaccatactttccatagcgat  
atcttaaaatcactgtgtacagtaatactttaacgttaacaaaacatctatcatggctccatagctaggttttacgctgtataattataagactg  
agtgtatgaattgaggggtgaaaaagttctttgtatattgggctctacatagtagtactataagtattttcagagtcactgactagacta  
gctaaataacgacaactagatttattaggccagatccgtcaaatctccaactgacgattcgtactccaacggttgtaataatcttctaaa  
acaaatacgttcttctttgataagataataagacctctattttataataatacaataaattcggccttggcagtgaggagacgagacgcta  
tcgtattagtgatcttaaatatcatcttagcttctacttaatacgttacttgcgaaataaggcacccttgcaactccttgacgttcaagtactg  
atggcttgcagcttcttctgtaacaaatcaacttagtaaaacagctccgtcacagctctatcgcgcttgatttacttactgattgtttgcatct  
aaaataaaaagatgacatgaaattctcgcacccagcgaacgtagttgaaagaatcaatgtaacaaagcactgcttgagccaacaaga  
gctgtgcttagatttctgtttagattcaggatggtctttctaacttttagcctattacatgacaagcgcagatccagaatcgttcgcttacga  
atgctgttgcgagatggccagccttgctgtccaacgctgtagcatttccgcatgcttcaaggcttggaaagctggcatgcagaaaat  
tcttctatgttaccgaagaaaatccatcatcagtcagctgagtcattcaagtagacattcagcataaccgtcccttattacctttggaggag  
aaggatccgactggatgagataatgaagaattgagcaaatcgccctgacttggggggatgctccttgggtgtatgctgaatgttacttita  
tcggatcatgaaccttcttacaagctcactctgagtggaagcgcctatgaccccttttgacaaaaagattctaccctgaagttagtcatgctg  
gccattgaagacttagctgctgctatgtccaccttgcctgtagctgaaatctgtccacaaaaacacgaaccgagtggtctacatgattttcg  
ttgaaatggcgaggttctttatggggaatgcaaccgaccttagcttactaacaatttaacctgaagaattgcagaacctcagggccga  
aaggctgagaagaatccaaaaaacatttgggtgaatgactttccagcggctggtgcaaaagctcaagtcaggggtggtcgtatcatttt  
gtcttgataatgctggattgaaactctatgttagctgtgttcgagcttacctcctaaaatcaggcattgctggcacaattattctacatccaag  
gatattccttggtttctgacgcttagtgaatgatattccgcatatattacttctttgacatcttattttctggtgataacattaccaactcgt  
tcagatctcaagagttcatgctgaaggaaaaatcctaaccgacctatccttttgacaaccgctcatttttggctgatgctgactttgct  
ccgcttagttgatgattggctcagtcggatattgctcattcaaaaggtaactttgctcattacttacttccctactaacgatttaggtgattg  
aattatcgaaattgactggcagctggaatggcccaagacaactccctcgaagtgtcttggacccttctggaatattaatatcctagctc  
ttcgtacatgaaagcgaatgaaatcttgcgaaagagctactgcttactaatgttttagtgatgtgtcgtcggcttgaagaagcttatttga  
agattgctgaacaactcctcattgggaacgaacgggtaaatatgcccgttctcaatactgccaagaattgagttacatctttgaattacgt  
aatctttgactatttatacagttcagatagcatagaacaagatgcaatgatgaaatgctatttcaatgaaagtaaatctatgcacaaactatt  
tccgttctaatcttcaatccttaataactcgtttaaaccagggtatgaagcttattttgctcgtctttataaacaatgcatgttagacc  
cactcccctgcaaaatagagtttctttgtttcattaacgcccagcgtaaatttctacttattgcttctcgtcgaatgtaccagttt  
ttgttactactgcagtcgagatttaattgaaatcgagatttacttgaatcatctctgatactgataacttaccgactgcaagcaatcca  
gtaaaaatttttagcgttatcaaacctcggttaatgtcggtaggttgcgccgtagcatataaatcacgtaaaagcgaatcgtcctttgact  
taccaccatttctgtagccattacaactcaattttgaccttctggtcaattatcgcttttaacaagtaacttctgtttaaagaagcgtatt  
ttaggtatattccttttccgcttaattatcttattttcactttctgtctgtaattgattcatcgtgatccttcttctctgtgagatcttattgt  
cttctttctatataaccgtttttatttgcgtttatttctccctatcaaaaatggggtaaaatggaatccttctctaagtctaagaagccaagga  
accttctctggaacagatgaagcggctgatcaaaaaaaatagctggcttagcaacaaacaagaggcaagctccttcatcgcgggta  
ctggattttattggatagttacgactgttattcaacctcgtctccagctatttcttattgtactgggggtggttagaaggccatgaagacta  
cccatcggaattcgtggtctgtaaatgctgccacaaactggtaacattatgggacagcttatattcggcttctgggtgacttttccgctc

agttcgtttatggcaaggaaatgatggctgttattatgccactattctttaaattagtcttccgaccgcttctactccttgaacaaggcgaatg  
ggcttttactttccgtgtgtactaggtattgggtattgggtgattatccgatgctgcttccatcacctctgagcaatctatgattaaccgctgg  
tactttgctagcttggatTTTTCCAATCAAGGTGGGGAACCTTCCGGTGTATCGCTACTCTGATTACCTCGCGTGTATAGCACATCTTAGAC  
AAGCATGGTGATTACACAAATGGATGGTGTATGGCGTATCAATCGGCATTGCCTATCCCCGCTTTCTGTCTTGATTCCTCGATTGAGAATG  
CAAGAAATCGAAACAATTAAGGACTCGAAGAAATGTGCATGCTTAATGAAGAAGAAAACAATTCAGATCGATGATAAAGAAAGACCA  
GAAACGTATACTCCCATGGACCCTGCCAGCATTGGACCCAGGAAAACCTAACCGAAAAACATCTGGTCTGTACAAGTTGAACCACACGATG  
CTTCTTCTGTGACTTCAAAGATCTATCTTCTGGTAAGACGGAGCAGAAGCAAGAAGTAAGACCGGCTCTACCTCGTTGCTACTTTTCTGAGTG  
GAGACACATGAAATTATTGCTTGGTTCAGCTATCTTGGTCTTTTGGATATCGCATTTTATGGTGTCAATCTAACCAATCTGTTCTCTCGACGAG  
ATGGGCTTAAACAGCGGAAGAAACCAATATAAGAAATGAGAGAAATGCTATCGGTAATTTGATTATTTCCATCGCGGTTATGTTCCAGGATAC  
TGGGCATCTGTTTTTGTATGAAAAATTGGTGC AAAATGGATCAAAATGCAGGGATTGCTGTTGCTCTTTTGTGCTGACTTGTCTGGAAT  
GGAATACTATTCCACTGCTGGAAGATTGTATGTGTGCTTGGCCAGTTTTCTTAACTTGGACCAACACAACCTTCATTGTTATCCAGCTGA  
AGTATCCCTCAAGAGTCTGGCTTCTCATGGAATCTGCGCGGCTGTGGTAAAGCGGGTGCATTCTCTGCTGTTTTATTAATAAGTTGAC  
GGAAGTAATGGTTTTGCAACGTGTGGATCTCTTGGTGCATGGTTTTGGCATGATTCAGTTGCTTTGCCGAAACTGCTGGTCTGAT  
GCAGATTGGTTGATCGCTTGAATAACTGCCCTCAACAAGGAAAGCATTCTATTATCGACCGGACTGAGAAATGGGCTTGGTGAACACGG  
ATTTAATTTACCTGTGTGATTACATATTTTGTGACTACAAGTCGGCAATTTGTTGATTGTTGATTGTTGTTGTTTTATTATTTTCATATT  
TCAAAGTTGAGCAGTAACCTAGAGATTCGTGACTTTGATTGTTAAGCTGTTCTTTGACTTCCAATTTATCTTACTATGTTATTTTTAT  
GCACAAAGAAGATTGATGTACTTGGCAGTTTACTGTGGATATCATCTTAAACATTAGTAAACAGTGGGTTTTCTAGAGTTAGTTTCTGAG  
AAGTTGTGTTCTTTGATAACTTCTCAAGACCTTATATATATATCGAAAAAAGGAAACGAAACTAAAGCATTGTTTAAATTAATAT  
ATATTTATAAAGTTGATATATATCTAATAATTTCTTTCTGTATACAGGCATAAGTGGTAGATCCATAAATCGTCTTCATTATACAATTATGTTG  
GTAGACTATAGTAAGTCTGTATCTAAGAACTGAGTACTAGCCCTGTAAGGGCGCTCTTCTTAATCCATTAGTAATGTTGCTAGCATTGTA  
ATGATGATGGAAACAGCATGGCATACTCTCAGTTTCATAAAGTAATCCAACGTATTGTATTACTTTTTTTGCTTGTGTTACTATAACAT  
TAAATGAAAACCTATACTCTTGTGTTCAAGAAATGCTGCTAAAAAAGAGTATATAAATATCATCTCATTCTGTAATCTTTTTATTATA  
AATATAATAGTATTCACTGCTTAATCGTTGGTCAAGATCAAGTAAATCAACTTCTATTACAGTTTAAAGGGCAGGAATCTGCATTCCTAA  
CATTGGAGCACAGTCTAGCATACTAAAAATACCTAGTAAATCTACTGAAAGACATGAACGTAACGAAGAATCTTTCGATGTTAGTATAGTT  
AATTAAGGGAAATAAGTTAAGATTGATAAAAAGTGAAGGAATAAACAATCATTCTGTGTGCAATTTTTGACCCTTTCATTAGAGTGGG  
CATGGAGGAAAAAATACTAATTAATAATCGGAATGCTGGATGTTACAGAGGATTGTTAAATGCTGTAACCAATCTGAGAGCCGAAT  
ACCGGTCTGTTCTATTAGAAATAGTGCGAACAAGGACCCGCTTATCAGAAAATAACAATGCATATAAAGCCGAATCACTTTACAAAATGCT  
AAAAAGGTATGAAAAAGAGCCGAAATGCTGACATCGAAATAGTATCGTGAACGACTTGAACAGGCCAATCGAGGTCAAATGCTGCGAA  
ACAAATAAGACAGGAAATAATGAAAAATATAAATCCTACTATATCAAAAAAGACAAGAAGTTCCCATGAAACGAGAACAGCGTTTAGCTC  
AAATTTACAAAACAAAAAGCCAGTTTCTATCAAGATTATACCGTATGGGAACATTCTTACCATTTGTAATGACTACCGGAGGAGATAC  
TTTTTGCGGCCAAAATATTGGAAGCAAAGTGAGCGCATAAGTATGATGTTGAAAAACGAATCGAAACCAAGAGCATAGACACCAGCTATC  
CAAGCAATGAATCATATGGTCTATCATGCATCCTTAGAGGATGAGTTTTAAACCATATACGAATGAAGACATAGGATTTGCAGAACTACTATA  
GAGAAATGTCGGGAGATTGAAAAAGCTTGA AAAATCTTACCAACAGGCGTCTAAATCTGGCATATTACAAGTCACTATATAGAAATGATTGTT  
ATGGAGGCAGAACGACAACGGCTAGAAAAGCGATATTTAAACCTGAAAAACTTAGGAAGGATAAGGTCTAGGCATATAGATGATAACTAG  
CATTGTTGGCGATTTCAACATACAAAAAATCAACAATAATCAACATCCACATAGGAATGCATAGTAGAAGTCCATCACAGTATTTAG  
ATTAGTATTCTAAACAATTATAAATCCCATTAATAACAATTTGTCTCAGTTATCGCTATGCTGCTGCTATATGCAGTAGACTGATTGATAA  
TTAACTAGGTCTATGATATTTTTGTTTTCTGTTCTGTTGGTACTTGGTGCATGTTGTGAAGTTACCAGTATTTCTATGCTGCTGAGCCTTGT  
AAATCGTATCATCAAAAAAATCGTCTCATCATCATCATCATCATTTAAGTACAAGTAGTGCGGACTCATCTGGCTCTCTCTGCT  
CTAAGGTCTGTGAGTATGAATGTTCTGAAACTGAATCTTGCGAACGCTTACTCTCGGTGCTATCCGAAGTCTCTCTCATTAGAAACTGGT  
CATTAACTCAGCCTGAATACTTTTTGCTTATGTTTTCTTCTGTTCTTCTCGATCTATTGTAGATCGTAGTAAGCTTAAACAATTAGATACAC  
GAGAAAGCTTATCTTGGCTCCGAATTTGTTGAGTTCAACTCAAAGTCTTGAACGCTTAAAGTATCTTGAAGTTATCTCTATCAATAGACT  
TATTGGTTGACTTGAAGGCATAGACACAGACCGGTATACGACTTGATTTGCTGCAGCCGATCCCAAGTTGACAACAGGATCGTTATAGCTG  
GACTTGGCTCTCTGAAGATTGGTAAATAGCTGTGAGATTGCTCATTAGACAACGATTACTTTTCATTGGTGACAATTTCAAGATACACATGGC  
TGATCACTTTTGGAGAATCTGGCATAGCTTATATGAAATAAAGCGATTTCTTTATAAGAGCAAATTAAGGCAGCTAAACGTTCTTGAACAAC  
GATCGACAGAAGAACTCTAGCTGTACGGTCAACTCAGACAATACTCAGATCTCTATCTTGTTTTTATCTTTTTATTA AAAAATAGTTGAAATC  
AATCACGAAAGAATCTGTAAGCTCAAAGAGTCAATGTGTA AAAACACGTTCTTTTGA AAAATTGGAGAAATCTGGTCTTTGCAATTACCA  
AAGCGCTAATCTTAGTTGCCAAAATAAACAGAAAATAAAGTAGTATTTGTAATAAATAAGAACGCGCACTTGAATATTTGGTTACT  
GAAATCAAGCCTGTAGGGAACGTAATCTGACTGTAACAAAACCTTTGTAAGACAGATAAAGACAATATGCACAAGAGAAATATCTTTTA

aaaccatcaatgcctatataaacctatccaaaaagtcctgctacgtgtaagatgtgggtctaccaagtatatttttacatgacatgaatctat  
caaaaactacaattggcaaacatttaacccaaaagaacacaagcagttcattcattcacctatactttaattgcaacaagtgtgatctaataatcat  
ttaacagaacaagatgaaggctaaggcagtaaaaacaaaagtgaagaataaagtctcaaacgatggaatagctcgaggagaagaagacatt  
gtaatgagacctgtgaacatgaaaagaacgagtagaatagggtgggagaatagaaagggtgtagacagtagtagtttctcgcgagccgtg  
gtaggcataacagctgattaatagtaggcaacctaagttagacagtttgggtgagggtataaaaccattggataaccactggtaattgtgac  
ggtaatattacctcatgtccaacggtagcagttcggtgcccaaaaacatcggaacaacttcgttctcgagtagttgggtaggactttgtagac  
agttccattatccttactaccaaggttattatataaaaggaagacatcacgcttttagcagcaacatgattcagctcagcttctataattgtgtaat  
tatggcgtgtaaaatcggaatcctgttcataacctgtttcggaattgactatagtttaacatggtatagtaaggattggttgatcgtacttag  
atgtccaaagagcttcacgattggcaggatccaatcccatagaaacctgttctgtccataataaacagatggaataccatcccacaaaata  
gcaaaactataagcggacatgataatcgtttagctcagtagataagatgataacggggcaaatcgtggttgcacaaaaaattagcattgtcc  
aagatcagagtttgagcattggcgtagcttagctcgtttgatccttaagcgtcccaaacctttgttggctgaaattgtcatgagccataa  
aactaaaattcaaacctagacgaacaacgtagttggttacacctatatcatagttcatgtaatcacacaacacattgggtcatagtcgaaaacct  
cacccatagaaaatacaccggcagatttgacaaaatcagggaaaaagccttcgttcatcatcttgacagcatcaatacgaagaccgtcaaaatc  
gagttgctgcacagaactgtgaatgtcttatcaagatatttttacatcgagccttccacattcaagtcggcaagaagcacaccagaatcttgc  
cagcagcttgaatatttcttattgtcggattgttccaatcaatgatacaataaggatgataatattttcctgtttaaaggataaaccttagaa  
taatcaactgatcataaggaccaaccaatgccatagagttacaactgtgtccaccattacccatatacagccttgtagcagcgctaattaag  
ctaagaagatcatcttgagtacaaaatgttcttatattcttcataattgatgttccaataaccgtggaagcctcgccggcgccagcgggatcac  
cttcaatattctgtgataggagaaatccaaatggcagtaagccaagatcttcaatgtagtctagcttattttcaatacctttccaagtaccacc  
acagtaagcattggaggaaggattgcaaggatggctcggtcctccgtcctttagcaaacgatccgttactatttgatagataattcgagttcgc  
cattcgtcagcattacgggctgtgtatatacgaagaatgcaacaaggaagaagaagggaatcaaaagcagtagatagattgaacatgaaaact  
gttataaattcgaactgaatgggtataatagaaaataaaaaatgctccggaaaatgagagatatataatgagagatcgtaaattacagattaa  
aaaagagagagatgagaagaaagaaagcaattaataaaaaagaaagaaagtaataatgaataaaatgcaaatcaaatgcaaaaaa  
gagggatgaaatgggtatcaggtattttcaaaacaaacggacctttttcaaaaacgaacttcgctaagctaagccccgaaaaagaataa  
tgcaaatagcttaaagtattttgtgaatataaacgataaactcctgttatcaaacctatatcttcgtaacaaatttcaaaactcgtcctcg  
ctgaagataaaaaaataaagtagaaggagggtgaatcagccctccgttgaatatacgtagcagtcaccagtgctacctaagaagtataata  
tttgcacttgaagagctccttatctgtacttacggaatagtagccgtaatgacgttatctgttcttgcaggaatgttgcctttcgtaggaaatga  
aatgcttctgtctcatttggatgaatctctagtataagatcaccaggacgatctgtaatcctggacaaggttgtgtagcattgccatccag  
tttctgtagggtcaattcgtgtccaaaaattcatagaactagttcataaattataacaggagagcaagaaaagttgtttgacgaactgaacta  
cgtgagcacaacaaatgggtgattttcaggagatcgattcgtacacccccctcctctacgtatgagaaccaaagtagaactagtagcataa  
acaaaagtaagcactggcacgtctccacaaggagatagaaagtctatcgattccattgaacgcttgattagttgatcttttttaagtatactatag  
tagattccatcaggggttgtttgtactctccctgtgggcccaggttttaaggagtttaagaagaagatattggggtagttaggggtgaggaac  
aatgaaaacaaagttgcataattcatctatttcagacttttgtgtacattatctagtaggaagggaatgaaatccacaaatcttgttcccatttag  
gctcgtagatgtacagcttctttcatgtatattccatgtttagatcatttcttctatcaaaagcctcgttcttggatattgtcacggaaat  
catactagggaatcataaaatagggttacgaatagaataacgactcggcggttatattgtcaagttgaaattcagttggagttctagttgcta  
tatattttaaaattcgtgatttcagataaatacgtgactggcaactaagtcgtagcattcgaatcaagttcgctggctctcacaacgggatac  
ttctaactaaagttcttatgaaatagcctttttgttaattattctgttctagaaaataagcaagtagtcttaaacctattgatcactgtattacta  
ttgtctttttgtttagtgcggtttgtgttttttttcttgatcaggcaacggcataaaacaattgctctttaccgtcatatctgttgataagagtt  
agtaaatattaagcttctctgacagaatccaaatggcactattggcactggcactactagtagtactcattgtaccttctacaaaaccttctgat  
gtagaatccaccaacaaagtaacaactcagaggtaacgctttgatcatcagtagtattcctgtcaagtcggtaacaataacctgcacgtatttctga  
cgtgggaatcttttagcagatcgtccctttttgctaaagaataaataaaccagaaggaaagaagcgttcttttgggtgctataaaacagagt  
cgacaacgtcacctgactttagactcgaattgaaattgccaagtagtctcctttctgcatgtagtttattaagttctattcctatggaagaagcaaa  
ggaactgtacgaagttctcgacttctattgatgtacgtagaataatcccagttctttcttactaattttatgaatgacaggcaaccctgcac  
aaataaagatgcatattataggctttcaagctgtttcatcccgatagacataatgttgaacaaaagttaccgcagagcaaaaaattccagagt  
gtacaagctgcttatgaagttctgtctgatccgataaagcgacaatttatgacaaatattggaacgaaaggactaaaagtagagtggtgtagc  
gacctgcaggacaatcaactgaagaattgcaagaagctattcgcgaacaactcaggctaaagaatccagaacttagattattgtgtaaaaa  
tagaactgaaacaaatgttatgattaatgtacgcctttattcgaaagaattgctgtacgtaatccctggcgttaggtatggcttctactagag  
aacttacattgctgagcgttttcttagtacagtggtatcgtttcattgaaaaacttttagtattcctttgagtagtcttaaaaaactcgaagtt  
tctattccaaacttcttcaaggcttccaaggatgatgattttccgatccgctagaagataatgagtagtataaatggctcaacacgtctcattt

tatcaccgaagcatctgcaaaaccaggcgccaggaccaaccttctgtctgccgttattcgacatcaaccttctgctcgttaagcacagaaac  
aggattatctattttacgtccaggaattgctactgtaaaagctatatatgctttgaacaatgaaaccttctgatttctatgattcgagtgcttctcta  
caagcgaccacctcaagctacagtctgataggcgctcaaatttctgatacggcacgttatctgtacgtggaaaactggaagttggctcttagg  
tagttggggagctgcatatccttcaacaatgcttcttcttctatcatctggcaacaactaaagccctcactagatgatccatttccagcttga  
aatggaacccgaactcacagctggattgtatatagtggggttggctacaattataacattgacaccttaggtccatatcaactgcaatgtggaa  
catccctcagcaccgtcggaggctacaagctactcagacgccaatgaaaaagtttccgtcatagtccatgggcttaactgttgctatcggtct  
tccatccggtgcccttacattgaacattaggtatgtcgttcttcttgcgtaagtattacatacagaatataagctgggtccagattgggtcag  
aagttttcatttcaataatgtggagtagtcttgcagatcttctgcctttgggggttagctttaccattggatcaattttagcgttgattatt  
tgttcttagctctagacgtatatccgaggagaagcgcaaaagagcttctgcttgcacaacataaaaaattacatgatacagaagaagca  
gctgagcaaatctctcattaatgagggagctgtcaaaagaaacagaaaaatggaggctgaaaaaggtgggtctcattatcgaatatgcagaat  
acagaactattctagaaaatcagccttaactaaacgcaaagagggttataaaacaagatgttactataccaattgcttccctggctgacgat  
tctcgttagttatccctcagctgtctctaaagtaagtaaaaaatggataagctaaagttaaccactgcagcttccattattgggattatccttta  
tttctgatgcagataaagaattgttattgtatataaattcatcagcagctctcatgctttgttacgagataagcaaggggtcttttaccta  
cgaggatgaatttaaaatgaaaggtcaattactaataataatagagcataagttgtataaaaaactattatttgttataatttattgattg  
ggattctgaggtttgttgttacatatgaataagttacatataagctctcaacgctcattaaatttaaccagaacaattccctgaagcgtaagac  
aaactgcagcttttcaaggctaggttagaaggggttctgttaactcgtactgtatctcgcctatccagttaaatactgtctttagaaaaaa  
aaagacattctttttgaaaagtattgttaattctaaatgtacatatgtcctgcaaacctttctttttataggggttccctagcagaacgaata  
acggctgatcagtagctttgacgaaatccttaaccgctaaccacttgagccctcaccgagttcaatcattctttagaacctcagtggtgc  
cgctttgagcatggttcttgaactactcaacggatcttccagcgacaccttatggcttctcgatttcaacgcttaattgagacccctgaagt  
taaatacccgaattaaatagttcggtagttggtgagcaatttctgagatttcaactcttagatttgaaggaaaggcggcattggctgtttaa  
atgctttacagcactcttagctctcgcaggttaccgctatgagcttttggtaacccaattgggtcgaagaagctaccgaaatc  
aatcatgtcgttggcttattatgttataacctggcgcctacttttactggaattgagaggactcgtgaactacttctccttctatatttgtt  
tgctcttccctatcattactggttctcagagttatctttaaagaagatattacgcagtaactttcaatcaacggggctgatccgataaatc  
cgttaaacagcttgagaatactctgagagtgattttaaactcccaaaatttgagcaactctgcgttaccagaaaacgatgaaccgttgatt  
gtgaggaacctcctcaggagcgtttaaagtttatttctactctgaatacaacatccagactggaatataaaatgaattgggtggttgg  
gagttatggctcagctcatgagtaataaccttaaacgctatgatttactggtagtcccttgcctcggcgatctgtatccagttgctgaaact  
gcacctccatcatggttaaattgtcaatcaaaattatgaagtgaagtttactatcactatctggaacatcaagtagtcttctgattgtcc  
tattttcaggaagcagacgtcccgcgatcttaccactccgcagtgacgattttcctctgctatattttatagatttggaaaccaatctatcgcagc  
cgtaatgtcatatgagaatctgatattatcatatcaatgactatcattgtgcttagctccttatataatcttccgaaaatagaccctgtgctgtt  
tcattgcataatgcggagttcagggctttggcctcctcagctctgcacgcatctacgagaagtttggacttttaactttctaaagcagtagt  
aagggtcagctacaattggcaatgcttcaattatgcacgagctcctcatacgttcgaagcatcaatctggtttgtgtggttgggttctc  
cgataagtaggtcataggtctgggtcgttatccgcttctggagcttaagaaggttgacattgcctaaccagatccaactgacattgatc  
ctgctatgcagtcggaagtaacagagttgctgatttgggtcaatataatgaaaagcggaaagactgaaaagcgaagactcaggaatgggcccg  
gttattgtgacgatactgccgacctttgggttgggtgacgctgctgagaaaggttgacctcgtgacagacctgacctactctatt  
agagaagtataacacacaactatcgtcgtaggtcctgtaattgatttatacggcaatttgcgtgaaaaatcgcataatattacggagcgtat  
cccggacgcgttttctgcctgaatttgcattacctcattcatattttaggtgctgatttgcgttacccttctcgcgatgaaccatttgg  
tttgggtcagtagaatttggtagaagggagctatttattggtgcatgcgttgggtgattaggtgaaatgcctggctggtgatactgttgaat  
cgtcaactactcctcatcttgaagcaattgagactgcttgcctagagctttaaacttctcctgaaacacccatagcttctgtgtggtgca  
gttcaacaacgcttctgttactgagtggtgaccttatacagacaggttaattaagaatgattaagacgaataggaaggtatthaagtcgaat  
agcttttagtgacaatctggcaatactcctcggagttccaatcattcaaatagacgatacagaccgagttgacatggttgacgaacctaact  
gatagccaggaatccctgaaacaacagaatcaccactcggcgctgaaagcaatagcttaatttctgatcaacttagccagaaaaacttg  
acgaattaatggaagatgataacgattcagtagtcatctccgtaattagtcgaccttaccgaaactaacatctctcagagttcaatgaattt  
ggcactaaactcagtagaaagatttattgatgcaaatgggtggcaatcacagaatttccagcagaactaagttccttgaccagaaaaattcaa  
atcaaaactgtgatcagactttttagatgaatgtctgcataatggtacgacgaagaacaccactattataagaccggttccgtcctcgtttt  
acaagtacttgagaacgagaggcaagaaccacgagaactaatgatggctctagcgaacaccttacggaaggctccttaaggaaattgacgg  
ccccgttaaagggtgtagtaaatcagctatctacatgtcagcgagtgatgtatgtaaaggtatttggctggccaatgtatgctatttcttgcct  
tgggtcagatttataatcttctattcatttaactctttatccgattcgaacaagctatgttgcctctatgtatgtatgaacgaatattata  
ctctccacttcttttgggtgggctttacagaaaatttgcagcattcattgtctgcaatcccgttactatataatggctagcgtttaccatgactgg

tatctcatccatgcccttcattcaatttacgacgagagggtggttgagttatggagctacttggatctatgctatcgagcatctagtggaccttgt  
atttacattgaatttcgaagacgagcatactaaaggcttaggttcttgggttacgagcttgattctacacggccttcaacagttgtggacagc  
tcttcttggcttggggaacggtatatagtcgttagactggaactatgctatactaatcaaaccttgaatcatgtactcgttcagctgctgtttg  
gccaattgcatlgtgctcatgatgactacgatcatgttgcacaaaggcttacccttcttgcacagacgccaggtagtataccagcatttacta  
agtcttgttccatcgtcgagtagttgatgttcttactatggttccaacaaactctggatgtctacactaattggtcgtggatggagatntt  
ctggaattctgagctaccgtgcttggaaagtagttgcatgatgttcttcttcttcttcttcttcttcttcttcttcttcttcttcttcttctt  
caaataccatacttggtaattccgggtattgggcttaggttggaggaatcaaatggattcatgtattctggggaacctcgaacattggattctt  
ttgcttgggctggaattccgggagcatttgggtcgtgcttggcttggctaggagcttagattctaccaaggaattggatgtggcttatt  
cttctcaaacgctatctgaagacatgtgacgaatacattgctgactggtcaagtattgggttcttattacactactagcatcttctcagatcacct  
accaaaaccggccaggcagtgattccagatataacttctatagcagctggatggattacagccaatttctaatttcccttgggcatgtct  
tttactaaatgttatttgtgtggctcctatctaaatgcttccacaaagaaaataaacaggccttaattcttcttcttcttcttcttcttcttctt  
ggcttcttcttcttcttcttcttcttcttcttcttcttcttcttcttcttcttcttcttcttcttcttcttcttcttcttcttcttcttcttctt  
tccttagaaaagaaaactttagatgaaataattcttctgcttggacagtgctgatgaaatcttctcttcttcttcttcttcttcttcttcttcttctt  
ttatttggtaaacgttaatgaaggaatgtgcttcaatcacctcctatacatcaaggtacacaaaagtgctcaggttagaacgtctccata  
gaagtaccataaaagtattgaacgaatatttaacgaaattacaacgaagatatacaataacatgaactcgaatctttaaagatttggtaa  
atgaaacaaacacatgaaagaaacgaaaggattactcaagaaacaaatccgcaattggttcatggatgaatctctgctaggttggttcat  
aaggcgcgtctatttctatgaatgaagatattgatgaagtaaaaacgagtgagtaaggacttattattggactttagctagctaaatgtatgg  
aacaatggatgcagaatgatcattgaaagtcattgaatactcaaaaaaccattacgagagtttctcgtatctgcgaaggctacgggctaaag  
ccattaccgttcttctgcttaccaaagattcagacgccagaagcattaaaaatagcaaggtacaagctacgaaaagatggaaaaagagatga  
gttcgataacgggagaaagtacacaagatgaagaactagagcgtaaagaaggaccaacaaaatacaaatggcattggaagacacagttgac  
gatctggacatgttgagatggagattcagatttaaggaaatctgaaaagattacagagaaatgaagatgataggaaaaaaagatgatg  
aaacacttaagaaggaagagcaagaaagcagatcaaacacttggaaactggatgcttactaaagacggccttggatcccaaaaata  
gaccatacaaccatttacaattgtttcagatagaatactaagtcgaaaaatgttttggacctggttataacttgcgactatgagtggtgatga  
ttatttggacgaagaatacaaacgcggaatatcgtaagccaaaaggataatccaatcaagaagagttgaagatgaagaagatgatgaat  
ttctgatccaaaactatgaaagaacgatactgggatgaatataaagaagccaatctcagaggcagtggaacacaaatggtaaaccgaggata  
ggaaaatagatcattgaaagaaaaagcttactcattctatgaggttcttcttcttcttcttcttcttcttcttcttcttcttcttcttcttctt  
tgttataataagcatcgcaatacaagttacctgagaatattacgttgaagcagttttaaagtgttcttcttcttcttcttcttcttcttcttcttcttctt  
agttaaacggcttattctcattgtcaaacgaataccatcgttcatctgcttcttcttcttcttcttcttcttcttcttcttcttcttcttcttcttctt  
aacgaaaatttactatagatcagatcaaaaattcactagttgatccttcaaatctcaattcttcttcttcttcttcttcttcttcttcttcttcttcttctt  
aaccctctagaagaccttgccttcttcttcttcttcttcttcttcttcttcttcttcttcttcttcttcttcttcttcttcttcttcttcttcttcttctt  
gtgctctagcttcttcttcttcttcttcttcttcttcttcttcttcttcttcttcttcttcttcttcttcttcttcttcttcttcttcttcttcttcttctt  
gttagaattgaaacgatgctgagacgatgtgttgacatagctcaactaaaagaccatattgctgctagtgttctaatggtacctgggctgtt  
atgataagactcttctacgagaggcattcaaagtcgaaagctcattcaatatcactggattgtcagttatgagcagcaaatggaggttaa  
cgtcgggtactgatggaagttgcaacttgggatatacgaatcatcagctaagccagttcgaacttggctcagagtcggtaaccttctacgtg  
ttggcgaccaatcgagcggaacaaatagcagttggttctgaattaaacacgttctgtagcttcttcttcttcttcttcttcttcttcttcttcttcttctt  
gatcattcgtcaatggaacgatgctcacaacgacgatataactagtttacaattctcctaaagataaataatttacttcttcttcttcttcttcttcttctt  
gactggtaattcttattgacattactaaagatgaagatacagagaatgccgatgaagatccggttgcattataaacatgaagcatctattc  
atcttgctcgttcttaggtaaacgaagatttggcactgtctcatatggaatcttatgcttatacaagttgaagcgtgattggatgacaaaaca  
tggacaagtaagaagtcgcttctgaccaagacttacgacagtcgctcccagcttctcagttatgtgattgatgttcttcttcttcttcttcttcttcttcttctt  
tacatgctggcttggtaactttcaagtaatgagacacatttagcttcttggatcggactggcgaataaataaagaaacgcgtggttga  
aaggatgagtactgagattgtcgggctatcacttatgattcaaaaatcacgtctactatacaggtgggaagatggcatgctacagttcttca  
gatgattccaaagtttaagccttagaaaaaagacataaaatagacatcattttttttttctgctactggtagttttagtaggaaca  
tcaaatatataatgcatgacttggcatcattgcctaaagggatcaatggatcgttggagcatacatctgtttaaactgattgtcatattag  
ccttaatagtaatgaatgtttattgtctaggggcaatgaatataattcaaatatgtttatactacataatgcttataacatagttgctt  
tttctttagtaactgcaagcatagcttctttagcgaataaagcgttgaatattggtaccctgtaagcatattctcaaacctcattaacaccattg  
actgagagtaagtaaaaaactcacatattccgctataaatcctgtatagtaatatcttgggtcgttcttcttcttcttcttcttcttcttcttcttcttctt  
gctaattctcggtttagatgtgaaacaatacagcgaatggatgactgtgctgaaacataatgtgattcgaattgatgaaaaggattc  
caciaatttcaagaacatgaattgaaaagccaacgatcttagtgcttagttgatgaaacgcagctgcaagatgcgaat

acagacatcgtattggcatatggagacagcgatgagtaggtatgaatatgtctgcacttttggatctaaacaaacatataatagtttggat  
ggcgaagagtagtaattatgaacggagagaaaacaaatagtttctcatgtgtctcctgtttacatcggcctcgtttcaattggcctcaa  
tattttgagattccactctgtctctccatccttcgacggacgtgctgtttatctaatcttagcgtttacgggactatctgaactggagacagg  
tcgactgtcacataaataattgtataatactacgttttgggcttatacaaaaaggcggattaacaaatacaaaaggcagaagaatacttaaaa  
gtatgttttgattatgctcggaaactatgatataactatcggctccttgggaccgtcttagggtagtaataagttctcaaaagcatgaaattctctttc  
tcaatttcataaaactataataacgaacgtgaaattataagaaaggtcaatctgggtacgcgaggttaagttcattttcagctacactagttctt  
ctgcttactctatccagcctgaagatgtatcagctccttcaaaaatcaaaagtactctactaaacaaaaacgaaaaatgggtttacgattacttc  
atgttagtattattgacaatgagtttgaattctcgaccctaccctcaccattctgctgaactaagcttataatttttataaaataacccaatggg  
acctggcgttttcttagttactacaatagatgtgcaaaatatttgaagccatagactttatgatataatcatgcgttgcttcttattatcaatt  
aaatatagattaataaataaagtaaaaaatattagcggtaaaaactggagtcatacaaaaataatcgaaattcataacgtgaaatcgggtg  
gaaagagaaaatctttataataacgtaacaaagacaagcgaataattatgcataattcgtagtaagggtcatattagctaatccttcagaaac  
cttatctgtcacatttgaagacttctgtagtttactttgcaataagtcaaacgcttgaaatcaacgtagttactatgggtttagctttatagct  
ttctcaataatgaaaagcttactgttctgaatagtaaggtattgttaaatcttcagtgccgttaggagtcgaaaattcacctcaagtagcgatt  
ctaataaactggcagccttatagcttctcaatgaattaacaaatcattaccagaaagttcagaagtagcagcgtttcagactgtctttag  
taaagaatattctggagtttcttagtactatgtcctaaagcctttggtagataagttgcgatgcaaacgtgggttagcctgtgttagt  
attaacgaaggtatataaataacgagcgtttcaaaaattgagtttctcagggcttctcgtatcttggatgataccaattcatcgttctcggca  
ctcagacgtattttctcatcattatagaccatacgggtgcaaaaatcaaacgcaattgcagaagttcaatatcccttgatataatgtcaatg  
attcttctactaaggaaactaatgatgctgatgtgagtcgagcgttcttattgaatcaaacgtgtatcatcaactcctcaagatggaagtactgt  
attaatttcacctcagccatattgaaaacagcattggatttagcggtagattttcaaaaactcctaatacgttctatcaatggctgagaataa  
taggtgcgttcgtacggctcggaaggttagctgtttgggtaagactgaatagggttttggctgtaataccatcaactcctatgattgagtttgc  
tagcaacattgagtgcccttccaatgcacttctagcgtattaccagcagggcatttggtaatgttattggcgtctgttcgaaagctcagcgtagc  
tgcgtaacaggtgtatgcgataagtagcattatgaggcggataggcatttagcctcatgtaaggtataggaatgcgacggggatggatataatg  
ttgagggttggatggcaacttccaggagagaagctccatgaaaaacgtctcgtttggagaagcagagttccatttagagaaggttctgatt  
ttgaactaggctcaattcatcagagtgatgctcaaaaggagtttaccattatggcgatcgcagcagacataagtagtactttatcggatacatgg  
ttattacgatgtttatgctcggaaattggtatgttctgtttagaattgagatgataagggtagttgctggcaggaggagcactttcgggaggaaaa  
tagcgggggcatgcggcagtgctgttccatcttagcataacgtgtggaaagcctcagttggatagttctcctggttagtgcagatccttgggc  
ttgaaaagcctgtcgtagtaaacgccaggaggattgttcggattgctttcgggaaaaagtcggaatataatgcgggactggaagaaggaatgt  
ttatacccctgacggcgtcctggatgtcactaccagttaaagtagagtcgtctaccactggagttgttattaccatgctggaaaaaattggctgta  
gtcgtatgcgatctgctgggtttgctttagcaatgcgcaaatcaacccttgatccgggtgaatataagcctcctcggaaattttataacatctt  
tgcacgtggatacggcgtaatgttcaacatggttaggagctttaaaggcggtttccaacggcatttcatagagaacagcggccacagacc  
ataaatccgctttgcatcgtatttctcatatctcaaaattcaggagccatataaaaggagatccacataacgtttcggccatgctggatgttga  
aggatcagcaaaaacaaagtcagctagtttagcattggcagtttcgggttaccataaattgaggatgttgttttaagaaatctcgggtgggtg  
gaggttgaacaggagattctgtggttaacatcgcgatgaatcagagaccgggagcgttaggaattggagcgcagaagctaatgcttcaaaaa  
atgacgaacgagcgttctcgtcagctccccttataaacaggaggttgctacattaatccaagctagagaaggtatgctgctgaacttttctcgt  
ttccgaatgaagtagcttaaatcaccxaaagagcagtagctcacaagatggataaacctgctactttgatacaatctattaatttactacgt  
gaaatgtcggatttctttaaattgatatttcaacttccaagtttctccaacagtttctggtaatttcttctgtagcagcgtcttaattggagacc  
cgccttgttcttagacacagtgtaattgttaataaacctacatcaagcacttattttaacttactgaatgcttccctgtaacaatggcaaa  
agagccgctcaatttctgatcgaataacatagggaccgatactttgattgttactatgtcgttcatacaaaaagaattccacaaaatctga  
atgaaaaagatctcaattcccaataatcaatccttagcatgggagttggcaaaagacatcatgagattaacaatagctttatcatcaatataat  
taaagtaacgcgctcagctccttaattgcaacaacagcagatcattcaaggtcagtgctgcatgcgtatctcaaggcagacaataactaa  
gtgattgaaggtgtggtttgatagatgtcagcgggtgtatcattgttactgacactggtaaacattccatactgttattagaccctaattta  
ctgcataataatctttataattatgtatgttcatgtcggcagatcttcatcgtataatgtaaatcaggtggaatgaacaactctagc  
tgcatcgtaatatgggtatcggaaggttactacgtttatagtagctactgttgaaggaatctgattagattaactaaatgagacgcttgaag  
acagcttagtctcatttagtcagaccgatcaaatctccaatctggctgtaaatgtatgcttatagcttttgaatagcgaacgtaatatgctt  
tttttaaatagttccaatgtgctcaggttcttctcataaacatactttccatagcgtatcttaaaatcactgtgtacagtaatgtttataat  
gtcaacaaaacacctatcgtgacaatgacaaggacttcttgaaggtgttaagagtaaatataattatcattttcaatacगतatagccattgta  
agcaggagtagaaaacgttccatccttaagaacaaaacactcattaataagacatgcagaagaacgttcacagatggagacgagaacgt  
atattaaagctagtaaaatagatggattgtcaatttcatcgttctcaaatcatttatttaagtattttccaatgccgatatagaaccacatgta

cataggcaaatgagattgtcattttccaatgagacaccttctagcatagcagtaaaaacagacatagctaaggatTTTTtaggctaacaatgagg  
gcaaatatgcagtcggtgtgcaagctgcagaaccataaagacagacgcggaaaaagcaaaagtacctccagtgTTTTTTgttcttgaatcct  
aaccttccatattttccaatgatacttgccatagaatctccacatccaagacaaaagtaaccaaccaagagctctgcagagggcgaccggtcc  
acgtagtgcagtagaanaacaaacagggttgcgcatccaattaaaggtaaatgtgcgaaataattaatggccacgatgatctctgttatccg  
tatactgccacaaaatttatgtatcatttccaaaacggctccaaacgagtcacgggatgccttcaataacaaaaacaaaagagcaccct  
gagaatgcaagatgtacgaaataggggtctgtacaataagtaggaaggaacataaacacaatcaaagcgtgatacgttttcttctaaaattta  
aaagttctcttttgtgcaaaaatagtaacgaaagaagctgccgttatgagagcaaacacaaagcctatatagcacgacaggcacaatacca  
ccaaatcaaaattgttatccttttctagaataaggactcaaaaaatttgacaaataccaatattcgggcttttctggatcgttttgaacc  
caaatcgagagacgaaaatacaacaaaagtagctgcataaactagtagagaagatttctctttgtaagtttgaacgagaacatgtttt  
gagcaggcatgaatttagtaaaactaacgaaggaacagatactaacaaaacaccggctaaaactgataccagagggccagcctcattcagaa  
aagtagcgtatgctacgctgctaagtcgggtggagatcaagacgacctcaataatgtaaagctgtttttgtgattctataaaggcattcataat  
agtaacatgaagttctaaaggaacagaccgggttgcagtccttcaataaatgagaagaaagagaatTTTaaagcttaaggcaagcgtgca  
ttgtaaagcaaacatgtacatttcatgaaaaagcgcagagtccttccaaaaccaatgcagaggatcgaaaaggaaacgaggaaagccat  
aacagcggcctattgtcaataattagcgttcaactgtctaccgcatacaagccacttactataaaagcatttttcttgggattggcaaacagata  
tacgaaagctggcaaaaaaaggcaatattagagaagctcggatagtagacaaaggaatcagatatgaatgggaggaagagaacagagaag  
atctccaaaataatttcaatttcaaaagaaggaaggtgcatgagtaataatgctaaaaagctttagataccaacaaagagagcaaaaatctg  
ttttatctataagtagattagagtgtactttcttctatctatattagaaaataatcattcatgtaattgcttgatcgaccggcgtattatacaaatcg  
aaattttgttaaagtcgctagaagttgttcaactaggaattagaaatgaaagattgtttgtaaaaaagtagctatagcattctatacaggtttca  
ttaatagtgtcaactgctttcctaaggtaaagtagaatacaaaaggtcggctgggtaaacgaagaagattctgctgaagcggaaaacaacaaa  
ttcatatcattgtattttcaccaaaataatcgatggaagtaagagatgattaattcaaaaataacacatggattacatctttgaaagcgaagta  
agaagacttgaatgcatactaggaacggttacgattagcttgatactactacgaaaaataagacaaaagcgtcaagcgtaaaataaagt  
aaagtaaagttgagtaaatgatgaagagctctatgaaagtaggtggagaaaggatggtaaaagaagaaggaaaacagcacataaaaaagg  
tatcaatctttttcaagaacatgtcatagatgtgcttgacattacaataaaaacattcaaacgagccaagtaaaaaaggtaggcattcataaa  
cggaaatatacttgacgacccttaacaagtcgttttatgcatgttgcgggtgtaatgacatagacaaggcaaccccagccactaattgcatcacg  
atcttgagcatttaaagagcttgggagatagtttcaaacaaatcttcaggctcgagattgggctcatacacggactcacacataccataaagttg  
ttctacggctgtaccactcacaataaaatcatcggcgaatcaatacatccaatggaatcgaaaccgaaataaaaggattgtcgtctttagaaa  
gaccagctacaactgggaaagaaaagtagggctcgaatctagaagaaaggttagtttgagaatagctattaaccagagaatcatttaagcaa  
caaaaaacaaaaagtagataatctatggcaaacgggaaagccttacctttttctgtaaagagaggtggacaccagattaccaaaggttttg  
gttcaatttgacgctcctcacggaattgtacatgtttactttataacggaatagttcataaagcgtctgaacatcactagcaaagcctgtaaggcc  
caaatcgtcttgtagtcataggaatacttttgaaaattgttcgcaaggatagattgtacaccaaacgcaagtcagatgcgatagcca  
cgagtttttctgcatggctacgagatccaccattatattcataatactcattttggcaatgtttcgtaaagagaagaaggattcatactc  
tctaaggatgcaagtaggatgagtgacataatattcggtagcgcagtgactcggataatagatttcaaggaataaatcaatacagtatgca  
ttttaatgaaacacaacaggtatggattttatttagtgcaaaatgcgttatgagcattcgtcaacatagacgttttaggtcataaaattcctcgtat  
gcggttagttaaagaaaggttaggaagcaagctcatctcgtctgttttaaaaggattttgacttgcatttttggactgcatagaaagtctattggg  
attgactgatttctcctctttttttctttgtggaagaacgcatgtggggtttacgagaaaagctcagtcattatagaagacaaaagt  
acctgacaaaacgggcgacagctcagcattcaattcattcttatactataaccgttttcttccgtttaaggtctcaccatataactcttttc  
cataaactatctttggaatagaagaatctccaacgaacattttgaacaaaacatttccacaaacgtacattgacatatgtgaacctttgaataa  
attccaataaaaaatagaggaaacaagatagattggaatgtcttttctggtggaattgtttttctgaatcataataaccctttaatacgtttt  
gttcttctgacatagtcacgctacacggttatgaattggataacgcgaaattagcacaattcactataagagtcaactagaacacgtaaacg  
cgcaagacaattccagctctgtcagatcaacagcttttttgaaatgcaaaaggattattactccatacttaacgtttcgcaaaaagcaacca  
agaagaaattcgggttgctataaaagagctgctttgaaacgcatccagatcgagtgctcccaatgatcgaacaaggccacacaacattcc  
agttagtgaaatgaggctttctatgtattaggagattctactcgtcgtcgaatgatcgtgaaagttctttccatcttctcctcagaccgaaag  
ccaaacaatcatcttcttctcgtggtgctgtaaagacgaggatgcttctctagtaaaagggaacaaatcttatggttccagctatggatt  
caagattctttcaaacctccaattcggcaatattttaacgaaatgatgaacgagcttccaatgaaggtcttttgcacatctttggactgtgtg  
ggcggcttctgtagctgcgcttgggttacttcttctgatttctaggtcctcttgggattctttgctggtgcgaaattgggtagagtgcgagat  
aaacatggaaaaagtgcttcaagtgttttatggatctccagctactgagaaagctctgatcctaagcaaacacttgcacacatactgaatagc  
tctaaaactttgctagtaatccgccttagtctttgcatgtgctggcatccattttgtttttgtttttttatgtttgttactcttctccttacg  
ttttatgtttcatgtcttatcctcacctgttataaaatgtttaacatcttctgaaaaagagaataaaaaagaaaaatttacgttatgaatatcatattg



atgatgcctcttctttccatttctgacatttcatcctgttttagtaagatattgtagtaattatagcaatattactgtattggaactccccttt  
gattaaacgaaacgctgtttctcatgtttcgtatttctacgaaatttgatgtcattatactgtgcaaatatgatgtagaatgttttctccctttctg  
ctgctcgaagaattctttccacctatctgacagtaaaagtaaggcaataaataaaagtattcattcagatcctttcttgtatataat  
atctcgaggattttatcgtggctgtcgtccagatttgaatctttccattcatttactgatattgtcctttgtctaccgttgtgtgagcaaagtga  
aagccttgtttacaattggtaaatcgcctttcagctttatgattgaaattgctctatcatgacttcttgaataacacatctccaacaacgcctc  
ggcgatgaattaaccggtctccattcggctgaccaaaaactacaagtactacgggtaataaatctttaaaggctcattatggcctcatcctca  
ccaggatcatccttctgcttatgttgcgctaaatctggatacacctcacgaaatgtgacacctaattaccgcgataatcaacctctcggactgca  
aatgactattctacggcctccgacggtagctgtggaacaagacaccaagctcgtcaacaagtgctgtggagagctcctgagctggtcctgg  
ctcgtatggatgctcaggttcttctgactatcagcctcatcctcacgctggcaaggccgctcagctccgctcatgtttcaaatataaaat  
aaggtgaaccgaatgcaaatgctactgattacgaggaacatcgcaaacattacaatttctcagtgccctgtttcacaggttctgctcaacaac  
ctccacctactgatcttaaccacaacctgcaatgaacatgatgaagaagcttctgcaaaatccgctcgttctcagatggctaaacattctgc  
aacttctgctcatcaaacaccagaacctcaaccgctactgaatctgaattacccatcgatggctgcttctcaactggttcataatattctttac  
aaggttcttctttaaaccaaaagaatcttcttcaagaatctccacctgaaaccttaattcttctgctgctcatcttctgctcctcactc  
tcgacctacgatgaatcgtccgctcctcctactgtagaacagcagaagctgcttctcagatgatggaagagttcgcaaatatgcatatgtttccg  
tccgtaacaacgcttaccggatctgacacaagaatagtgctgcatggaatagagatgatgcttctgtaactttcaaaaagcaatatt  
ttaaataatgcgccaggctatcaaggctcacgagcttctgcatcttaacactaaaaatgttagcaatgagcgtcattcaaaacctatttactca  
gtccaggttctggtcagtcaccagctccgtatcagcaaaaacaaaagaacctcatatgattcagtgctgctccgctgcttctcgtcgtcatcg  
tactacagatgtaaacacatcccgtgaccagacgttgaagccaagaggattcaagggctcgtgattcatccgacaatgcttttccatcaa  
gtagcccgattgcaaccagtggtccaggaaatgatccaggttatccaaacatttctggtactgaacgagcaaatcaatctgaggaatccag  
cgtgttctgtagatgaattggatctctcaaaaatccaaaataggacagactctcaaatctgcttaccgctctagatcttctgccgattataagtc  
ggttggcaatctgttcatcctcctacaggtccagtagtagttatacaccatagtcagagaagatttctgagacagggcaatccctaat  
aatgaaggggaaatccccgagaatggctcagatggtataaatcctgtaggcatgcaagctgctgctcagcgaagcaatagaactctatggctg  
ctgttcttagcggaccggtgttctcaaatgatgtagatgtgaagctctacaaaagaagaatcttagagcttaccattgatcatgaacgtgaag  
aagcttatcgattgatcttggctggtcgtcttatttctccggaggagttagagtaaatgcccagacgtaatgtagatcctatggtttctgaacta  
gctgaacgtgccacgaaagaatcaagaaagcaggaggcaaacgaagctaaaaatgcaaaaagcttgaagaagagaacgccag  
aagaaaagagacgaaaaggcgtaaagcagaggaaaaacgacttctaaggaaagactaaattgctaagcagatgtccaaggaggctg  
gtaaaactgatgaagcagccccactgtaattgcagaccaagaacaaggcagcacctctcagaagtatctttggtgaacaagagcaagaaga  
tcaatctttgatcctactaccaagaatcttctgattcaaaaaactgatatagcaaatgctacgaaacaagaatgcttcaaccgaaagagg  
agcagaagaagaagtacagcagcctaccgctcggaaacttctggcgaactgaacgtgattgaatgctaacttctgatcagatcttctatg  
atgaagcgaatgaactggatggtatcggaaagacctccggttctaccgttgagagcaatgaaagtgattacagagacgaaatgaggccgctta  
cacaacctcacctaatggcaatttactgattcaatcagtttctgtgtacaagaacggtaatcatgtatgatggtcaagaacaggctgtaag  
tccgaatctgatgaggtcacagaggctcctatgtttgatgctggcgaatataaaagagacgtatctcagaagatgattggacgaaagcg  
ctaaagtaacttaaaaaactcaccaaagtcaccggtcgttggtaaaaaaaagctcaaaaatcataaagataaggcagctgtcaagcgtat  
gttagaagaagattcttctaagagactatctgagaatgaaaaggttcatgtgagtgcttctcagagagatgtgtcgctattggtgatggtatgac  
tccagctgctgaaatgaacaacgaccgctgttgaaccattacgagcctggtcagttatgaaaaagactgaggagagatgccgct  
gttggatgctcaacctcatgtaaatgttctctgttctcaaacgaggtggtgtgaagaagcattggatgaagcagctgttcaaaaactg  
atgagatccagttgagaacgggaacttgaacagaagaagaatacaggggaagaaaaagaggagattcaatcaagtggttaggtcatt  
tccctatccccgtaagagcctattggagccgatttcatgaggattataagtaagaaaactacggtttaggactgatttcttgggtgcaatt  
atcggctcaatataatctttaaacttgaccgtggcatggcctttgaacgggtgataagtaagaacatattgtcttttctgataatataagt  
ttaattatttttggtttacttgaaagtcaatatcctgctgaagctgccacgctttttacttggtaagatagaaactacgattttactta  
agacaggtgttatttactgtatgacagcttataagaaggaagacgataacttttgggtgaacggctgtagcgaactgatctttccggatt  
atattgtttacaagtaattagtgtatattaataggaaaagaatgtgacttccatacatattataattttagtaattgtttatccttgtatgatgga  
gttcgtattggaagtgtatcctacgagcgaattggtaaatagtaagtaaatgggatagtaataactgactagattgtgtcttccagtgagat  
catcaggcaattagcgaacaggtcattatgaatattatccgattgtagttgtaattagctatgaagaaactgataatcattgcatgagaat  
tgattgttaacaccaattacatatatatgccttcatcatatcatcaggaaaggaaagcacagagatgtagttgtagtttaagccttccctta  
atattttaggaccagctaaaccaaataatataatgatgtattatggaagtcgtaacttcaaatcgatgttctcagcttcaaatagcatgtac  
ctctcgtataatagttgttctttactttacctttcttcttactcgaacatgggttaggtgacagttgtggaacgattatgaggacaatattac  
aagaggattacctaacttcaagatccaacccccgggtagcctgacaagtttccccgggtagcctgacaagttatgatattttacgtaa

agagtttatgaaggatgtttataaacgttactttagccaaacaccaggtggaaagtgaacaagagggtataccgtaagattgcgttttcgcgt  
attttaaaaaaattaagaaaaatctattcgaatataagaccaggaactatttaataatataataacttattattaatcaacggattatcccgagtg  
ttacatacataatatacaaaaatcgcgattaaagacacgagctctaagagcaaagtcagtcttttgatatctctttcattgttagtctattctta  
caataagatactcctcgttcgattctagttaggtaaatcctgtcgcacatcggaagttttgatcaccaacttttcaagtaacattatctacggcaat  
ccgttacattcttgctacgcaactgttactctgtgaataaacatcaagcagtggtgaaacggaatttttactgttaattaatagatccacattgt  
tgtgtgattcccatctttatactcaagatacattttgattttttgataatttcaccttaataactttaattatcctttatttgaacgacaagatggt  
tgaacgtattcatactacacctagtcgtccccgctactgggcttatctttttttactaccccctgtttgcttttaattgtggacaattgggtaattg  
tccttttgggtctttggagtgtcaagacaaatggcatacgcctggtgaacctgatcccgtatatacagtgataggggtgcgtataccaaaggatt  
tttcatcccatgtgctaataacagggttttctattttactttatcgccattcgctgtgcagacaatggcgatttctatatcctacctctgcca  
agatagagacctccttgggtgggttgcagtgctgacgagtgctgttggcgttttaactctctggcaattcgtgatgatcatcacgata  
gcgttactggaaattcaccgctgcttttagtagattggcttttctgcccctagcaatttttgaatggctctgcttatcgccattatcgcttt  
agtaagttgttagctttctgtttatgcaaagttataattatcgtcacggctattgtttgcgcatcgctttgctggctgcgccattacgaagatc  
gttctcgatcttagatttgagtggtgttggttttatgggctctctatattctctttgtgctggacgtgctccagctattatcatgaacgtt  
atccgaaggattcgggtgacttggagaagggtgtctggttaatacaagaaccagagactactacgctcctcctgtcgagccccagcggctgcg  
acacgagagactgagcatgtgatccctcagccttaagtcgactttgaagttctcaaattcgtctgtaatacaagggaatctaattacca  
ttaaaaaacaacctcaggaatgactgcgctgtcctgtgtgacaacagccgtttggagtctggtaaaaaattacttatgacaagacaagttac  
ttgtcttccttatccgatccgtatatacatttaattcaccttaccctcgattggtttgtcacgaatgataattttggtaaaaaacaacagcacttttc  
tttctcatatataatgttattcatatcaactgtttataacctcaaaatgaaattgttctgattatttcatatttcattgatctttatagtaagttacgt  
ataacgaaatgaaaagcacttctgttgaataaggcagtagcttagcttattatagaacagaaatattaacacacttgaacgcgaaactccgta  
gatatgcagaagcaactttgtctttaccatatacgtttatggcaccaattgcagaaaggactcggttaagttgattaaaagcaagaagattact  
aatgcaacagatttggcttaaaaggagcattgagccattatagcgggtggcctattggcttgcctctaatagaaaaatcctagtcaccagttt  
aggtgatcggattatgggtagcaatggggagactggtgaaaaatttttctattaataaggatgaagatgattacttctcgtatgattatgac  
aagtgatggaagcaagttgggttgccttttagatcgcgcttgggtacaatatagaagtacctcaggaagcgttaagtcgttaaaagctcat  
gaaacacaagtaattactatgaccattgacccgacaaacagcgtcttggctacgggtggtgctgaaggccttgaagggtgtgggatttagcagg  
tggatacacgacacagttttacgtggtcatggcggcatcatcagtgctcctcgtttggaaagtatcaagaaaaatgggtgctggcaagtggtgc  
cgacgatactcgagtacgactttgggatttaataaccagtcggtcaattgtacattcgaaggtcatagcagtgattcgaggccttaccatcgat  
gagtctgggtcgtttttattgagtggtcagagacaagacagtgcaagtttgggatctgaaaaagcgttctgctattcgcactatccctgtaatgc  
atggcgtggaatcccttggatgggtcaatcatctgggaaaaatgagaaagtaactatatacggctggtgaggggaacataattttagcctggaat  
tggaaaaactggagctcgttcaatccgatgttcagattatcctaatagaaacaatgcgattatccaggtatttctatggatgataattcacttct  
gactgtcattccgatttgagcttctgtacagagcttcaatgaagaaggttttttgggtcaaaagaagcttcatggatctttcgatgaagtca  
ttgactgtgcttggattggcgacgatatttggcaattgcatccaatactgaataattgatattttccgctgatggcacacaagtttatgggttt  
tagcaggtcataccgatattgttctcgaatgcagccttgaagatggcgtttggttagcaactggtgctaaagataatactacacgactgtgga  
atctagatgttgaaaaataaaatcttctgtgtacgtgtttacaggtcatacggctagcgtgacagctgtggcttgggtcccttggagcgcacat  
ggtttcccctcatatctgtatccgctcaagatcgcaacttgaagcgttatgatctaggttcttcttgactaattccgaaagtcagaatagagct  
atctggaccattaaagcgcagatgaccgcatataaatgctgttcaagatctgctgatggacgtatcgttgcactgttagtcaggacaaatca  
agttatgggattcatcttggtaagttatcggagttttgctggtcatcgtagaggtgtgtggcctgctattcaatccccatagcctgcaatta  
gctagtggtagcgggtgatcgaacagttcgtgtatggagtattgatgagcaacaatgtcttatacattagaaggacataccgggtgctgtcttaaag  
ctggcttatatacaaggggacacaaacttattagtgctgcccggcagcgttctgtaaagggttgggtccatagcctcgggtgaatgcgtcgaacat  
tggataaccatgaggacagagtttgggctgtagcagttcgtgatgatgggtcctcgcacatctggtggtgctgctgtaagtgtttggca  
agatgtcagaagagcatgctgctgaggaagctgaggaactcgaacgtcgtgctgaggccgaacaatcactggctaattacgaaaaggctga  
agattggcggaaatgctattgcttggcattgtcattggatagacctcgggttactacgccttttgaacagtgatgaattcaccatcaaaaag  
gaagtattacaggtaacgccagctggataagggtgatcagatttgagtataatcagttacaatttttcaacgcacatccgtgattggaatgt  
taatacaaaaactagcatggttgacagaggctctacatctactctacacgcttaccctcaaacatctttggaaattccgggaataaaaagg  
aattttgatagcatgtttccatataccagcgtcatcttcaaggattaatgatttggtaagaatcctatattgttattatgttatgtaaataaa  
accgaacactttaattgaggttagtactttcgttacttaactttttcaaaaggtcaatttcagctattgatttttctatgtttcaaaatcgggtta  
aataaaatttgggtctatattttggaaaacttgcaaccaatagcaattgtagcttttctggagggttaagggtagtagaaatataacctcaaaa  
tttaggaaccagacatgagaaggatacggtaatacttttctagaaatctcgtttgtccaattccaagcgtggttaaccggcctcaatacaac  
ttcagcgtcgtaccaattgtcagcaccagctccatcgaatgcatgtttgaaaaatccagtagtaagttcgtcagacctctaattgcttccata

ttcttcttcaatgtattgtaccaagaaggatctctcaaattccagttgttgaatacctttacaagagggttaagatgtgagggacttggcggt  
atgttgcgatgaacattaaagcgttaggtacggcacgatcacctaaatgtacaacggagctacctatccaaggcaattcctgctcatgctgactc  
cggacaatattctattaaccgtcgtacggagcaaagggcacgcctgaacgcggttcaaacctgtccagatcagaaatgaaatctcgtatctt  
tgtcaacaagggatgcatcgcttgaagccatagcaaaaaatttgggtccatcatacaagacccaaattgcaagcttgggtcaacataagaaaat  
tgcgttcgggtgatcatgtttagacgggcaccattcataaaaccaatttcaagttccaccttcttgaatcttgggtgaaagaattcatacaa  
ataagatcgatcttttcaacaggaacccgattagccaacagaaatgactcatgactgctaatgaaaccagacagcttccaaaattctcttttt  
ccatcattccccttgcgtattttttagcaaaaacatcactgcttttttctctcattattttggaccgtaaggaggatccagcatagggatcta  
tttgttgagagcagtgctagaagctgctttcagaagaatatctagcaaaccttcttctaaaacacgaaaaacggtttttacagggatgta  
aaagtcaaagcccatttgcatacggacatcaggatcatggaatctggccatgtacatcatagcgccataagtagtacgatttttccggggttc  
atgattttataacgtcgacctatttcaaatatcgatttgaagaaatctgcgttcgtggcatggccttcttgcagtaaacctcgaccaagtttacg  
tccattgcaacaattaagcctgtcaaatgctgcacattccgatagataagtcacatcaattttgccttgatgtaggataataatcgacatg  
atcgggtatactcaataacatttagcctgaatgtagatgaattcacagaagataaagaagaaaaggaaatggaacagtaagtctttattgattg  
aaaacatatgttagacaatcttttggtaaactctctgccgaatgctcaagaagccatagcaagcaagcaaaaggaaaatttgatccaat  
agagaatgatatagtatatacaagctggttgaattaccaataatattttatctaaagatttgggatgtagtcttttgcctcacaaccttttctg  
tctcttacggtaattttacttacgctgcttcaataaacccagaatacagcgttcatcttgcctaaacgtacaggaacaaatttgattttcgacc  
agcttttttgaataatccggttttgacatgggtgattatcgagtagtgagcgttaagtcatacacttcacaaaaacttagaatccacaatt  
cttttttgcgtgattaaagtgtggtacaaagtctcttaaacacggttgcataatttttttactaccgtccatcaatctatcgattg  
ctgaagatcgcgcatgtgacttggatttctgaacgcttgaatcaaatgcttcttgaagaagaaatttttctactttggatagagaa  
ttggatcctgtaggaggttaatcactctacacggttccatataaaaccttgaagtcgacaaggatttttctggaatctacttctaatctct  
tttcttagtaagtatttaccgctcttttctgtagacatgctatactttgttagataagtcctaaatcgttagttctgtaatcgctccatacttag  
tccataacctaaagatttttcttcttgccttgcagtttttttgggtatttttgcggagtttgcataaaaattgctacttatggcgactg  
gtattttattggtttctttgattcaaacatctcggtaccttcaatcaatcggctgagccatttctctggtatcctacagttttcggaa  
acggagtcaaaatctactaaaatcgagattcctactgaggcaagcttattgtccaggatccagagatttcagaagaaatagagttcatcctgg  
aaattttcatggaaaaatcgtgaaaaatggtcatctcaatattggcgaacctaccattcctaagtagttaggatcattttcgaaaatgat  
tcataacctattttgagtgtagacgggtgactttgcagatgttctcattaagaaaatcttaccactgctcaaaagcactgcgtcttttatcga  
agcagagcaactcgttggccacaaggctgttctttactgaccattctgagcttcaaaagaaatagctgcgaaatataataatggatcatta  
cataaagctattcttttgcgggaaatccgatggttgcataaaaaagatttgagaaatggaccatccaggtttatcaataactccctaatt  
actacaaaacagcccttagtaatctcattaattacggaaataataatgatgctgcgttcttccgttaataatctacgtttctgacccccgattct  
tcaattacttgattattcaagtagtgaagattatagaacgacgcagaaagatacgtcgcttaaagcatgctatacgaagttgcttcaaattc  
tcaaattggggcagcaggttaggactcaagatagccaacatgcttccaccaatataatagggaaatccgtcgatttctaattttctgatgc  
aaggcgttgcgatccagattgtagtcaaaaggcacaattagatcaacacaccccccttagttctgagctcaacaatatcatgaacgtttacg  
agttgctataaatacaactgaaaaagaatatccgttcttctggattccctttcaaggaggcagcttgcctcgttgaacaagctcagcttttgc  
agcaaatattgtctgattccgagcagttatgcttcttggaaattatggaacgtaggcataggtcccattacttattctggctttagtggag  
gataaaagaatcacaagatgatccttgaatgcacacataatggctccttttctgatattttttagattatactgattttacagccattgctaaat  
cttataaaaaagaatgagaatcccttgaataaccagattccttgggaattctgtgactctttcattagccaacccgaaaaataatctctgct  
gaacttggattgaggccaggaatgctatgctggccgctcaggagcatgttttaatatcatgcataatgacgattacttgaatttgaatagtg  
atatatattatcgcttcttctcaagacgttatttcagaccagaagtcattaacatcatccactgcatacagtcctataaacgatacttagataat  
cctccaaattctccagacaagcttcgataaaaagcatatcttcttcaaaatcttcaattcttctgcatcagttccattgtccatgccttcttga  
gaaaggatactatttgaacgatgtgatttagaagacacaattagtagtgaagaagagggtcttttgcctcccgggtgatcttcagttatc  
tgaggcgattgaaagaacttcacgagcatcaagagtttgaaaaacacttcacgccttgagcacaatgatgaaagaagccgaattaatctca  
gatcaaaaacagtttaaaagtctgtctaaaagctatcaagctatagaaaaggccgtaaatcgaaaaaaaagacaagtggatcaatattgtcac  
aagaagaagacagtaaatgtataatcgttccagggttccattgattcttataaactttgtaaggatgagaacgaacaagaatatgctgtctata  
cgattcgtattgaacgctggaggagatataaaggatcaggttggatggctgctagaagatcagagaatttgcgaattgcataagcaattg  
aagcaaatgtttccacaagctcgtccttaaatcccaataaaaccgttatccctcaataactaagtcgatttggaaatagaaaaacggcc  
cttgaagaatactcgcaagctattttcagatgctgacgttgcgatagcaaaattttaagaatgttctatctcaacagaacgttactgcacctca  
aatgttcaatccaaagatagtcggtgaaagatggaagcgtcgttggagacactgggttttgaagtaaacggttctttaaattgtcacaagccg  
atagtacatcctctttttagctctatattgaaattttgattgagctctttcaccataaatgatataaagcaacagtggtgacgaaaaagca  
tatatttccattctagaacaactattcggagggtgcttggaaaaacgtatacgaacacaatgcatcagtggttcaatcaagagcgaatataca

gaaagtccaccagcttcgacatgaattaagtggaatcaagaaacctggacgatcggcagctgggtctagtcgtgctcgtaaaccagcttatgctg  
atcgaaatcaactgaaagctgaggctggatcatgcttgcatctatgtttctggatatacgcctgacatagccgttaaagaatctccgaatctt  
acaaaacaaacacttaatgcacatataatttaccttgctagatgaagcactggaaggttaaagcagcataaaggattcagcaacaaaa  
ccatagcttacgagctttctccgactcctccggtttaataatcatcgtactaatttgctacgcttaaatctgctcaatctgtagcaatctacagat  
tttaataattgaaacttatcttcttaacattatgatgccctattcaatcggtagcgacgctggattgaccaggacatagacctgataattttgta  
gattttggcctgaaaataagaccatattaatcttcattcgctacagtttgtaactactagcctttttcgtttactgggggtgtagaccaacagctat  
attagactaggtacagcgcaaaaggacctgaagcattcaacatccagtggtcctcaaacccggttggtgccttaacatataaataagtaatttaca  
agcgattaattaggaatgacatgtatgacaccactccttactctggcttctgttcaattgacgatgaaaggcagtgaaatgcaagactctgacat  
gaagtttaatttgtaatgatactttatttcttactctaatgggatcaactttaaacgattgatcttttaggaaatttcaaacagaagaattgatct  
gggaagttgaatttgaaattttaaaaattcgttaataagtaaacacgagtaaacactgctaaatagtagtggaataacattcaatcaatgaaatcga  
attggaatagaatgtaaaacatattaatagtagtataaaattgtaggtcaaaagatcactgggtcagtaggaggataatgactcaatcttcaa  
aaagcattgtaattgagtcgctgaagcaaatgtcgtgaaggatgctaaacggatgtacaattaacaatgatttctgaacaagctgagaggaaa  
atttactctgctcaaaaatttcaactcaagcattgagttatacaggagaacctgctcacaggatggtaggaaaagctccgacgatggctgta  
ttagatactttgttgattggaagtagtctcaagtaggattgtagttaggaacaatcaacaagacttggtagcttacaagtagacgggaccac  
gagcattgattgattgtgagagcttgggtctctttccgatcgtcttagagtattccgggagccattggatttctaaaggcgttgattttgctgt  
tataattgccgtccctatcttgccttcttcttcttcttcttcttcttcttcttcttcttcttcttcttcttcttcttcttcttcttcttctt  
acataggaataaaaatgaaacaatgcgacgggaccaaatttcttatggatttcaaggtaatgacagcactacattaacaaagcatatgaacg  
caagacagcaaatatgcataaacaccttagaatgatagttactatcttggctgactttctctgatgtatcacctgaaatcatcttcagggcgtc  
ataatcgtacacaattgaggctgaaacatgttgaatccacaattttgatgaggattcgtctggaagttcaatggaaagcgaaggaggatgata  
ttcgacgtcagtcggaaggagaagatggatggcattcaaggcagcctattccattcaagttaccacatctttttttatctttaaagaatga  
gtcaacctgaagaggctttgaggaaactgctcctttagcatctgaaatccctcctcagatgaagaggaaatcaagcaaatgctttggcaaggt  
tacgaaacagagaaatttctttcgttctattagggacttcttctcacctatactttgtcttttcttcttcttcttcttcttcttcttcttctt  
gtagatgataataaaagagaattagtgaaaggtatcccatattactttacatctatttcttctgatactggccttctgcttcttatttttattgtg  
ttactctcagctgttgttcaaggttgaatgggttcgattcccatggaagattgtcacgaaaaatgatacaacgaaaaggtagctttacc  
acattgaaatataaccaatcaaaaagttatttctctgaatatcagatattcaaggatgcctcctcaagttcctccagtaggtgaatataa  
caaaaaggaattctacggaaaactgtgcaaatctatctgacaagcgaagcggcatgcctactgaacacgaatggttataaaaaatacaagga  
gcttcttagtaattcaacattgagttccttggcggtgagaagcttcatttatcgtctaaacgatgctggtggaatagctttaggtgaaat  
aacaagaccttttctttctagctcctctaaaaaccgtttcaataatcaatcttctgtttatcttcaaaagcccaattgattttgtttattac  
cggtaccagatcaatcatcatatgcttattcggtagaaaaacataatcgtagctctatcataaagttcgtacatctttaaaccgtagtaggcc  
gtctcaactgttggtgaacaaatagacaatgcctttgctaaagtctcacctgttggaagtctggaactcgtcaacgtcaaccaagtaaaa  
aacagccatattataacctttctgcaattctataaaggacttcatcttgtttcatgactcttcatcctattccagctaaattagtacaccggttcc  
catgatccttagacgtacgtgatcacgaccaagcgtataattacaagcctttctgcttccaagattaattagttaatgaagcttaaaaaag  
aattcaaccaacatgctgttcataccagaaagaattgcttggccacatgcctaatgcacaagtgtagaacggcatataaagtgaagctttcg  
taccatccagaatgaagtaggagaagaaataactcatcgcgatgtttctcaaacctttgaaacttgccttttctgcaagaatagaaattgaattaa  
ggacactttggaatgcataattgagcttactgaaggcatgttaacattcgtactttgttaaagtacatgtatcctagattatacaaaaaatgaa  
taaaggggaataatcattgtgtaaaagaaaggaaaacaacagcacttggatgttcatgaaggtactttgtaaatgaaattaaggcttctcat  
ttaatagttgagaattggaatcgcaatttctcgttcttctggaacatggagtagtcggtataaacatcagattgtaaaaaagatgaaaag  
aaagaaaagaatctatctctatagcgggtgatccatatagaattgaggaatgaattgatgtcataaacattacattagaaggaaaataaaaa  
aataatctcatatgcgaaattcgttatcattctcgttcaagattggcttcttcttcttcttcttcttcttcttcttcttcttcttcttctt  
tccaagagttaaagtattgctgaattctgtgtataacagctcctctagtgtaaaatagttctcgagtaattgtaaacgttcttggaaaaaatcaa  
gtagtctgaaatgtatctagttgatctagataagcaggcatgtccgaataaaatcgtatctgtctcatccagaggcgctcaaaaggttcgcaagt  
aaggaaaccgcaagatgatctgcttggaaactgaaatgggattgccaaggtgtggtatggcaaggtgcaaggataatgccagtttattctg  
ggaagcaagagagtgaaatcaacggcatcacgtctgagctcctaattgatgaaaaagcgaagaacaattgcaacaccaatgtacagcgt  
gatgaaaagaaaaccacggcgtatccattggaagacacggaagcaatgattccaatagcggagagaagtataggagataaagggtaca  
caaaacgaaattctttatgggaaataaaggagtagggaagtaaaacaatccaacggcaagaacagcttgaagccaacgacagtaagagg  
aaaataagataacctccaaattagtggtatagcttgtgaaagataataatgcgaggaattaccatacagggaagagagctctgatgtga  
cattaaagttaaagaaagaaaaataggaaatacgaatggcgtaaacatctcgtctactaagacatttaaaacaagaatcatgcctatgac  
cgtaagggtagctggaagatgatacaacacttcgaaaaataagagacgcactcttgaataatcttctagggcctaagaaaagattctcttggg

atttcgtccacagcaaaacaggaactacccaaacaagtaaattgggggtcgaatgagaaaagcaattccaataaaagttaaaaccgtaaaa  
aagatcgaatcgtagatttggattatcgtatggcattggttcgaatttgagatgaataacttcaaataatttctgccattcccaaagagcaagagctgt  
cagcgggttttctaaagaattggcaaaagttcgaacaccgacatacgcattaaagaatgagaataaggaacaagcaagggtccattgtgcagct  
cttctccatagcgtatttagggcaaaactgataagtagcataatccagaatagcagcaaaaggttcttctgtaggattcgaggagcacctaccataatt  
gtgaattggaatcccatcctagtaatttttaaaaagcggtaacaagagcgcgaaaaacaaggggatgagaccagaacgaatgacttttccattc  
ccaagttaaaaatccatatacaaacactaaatgatgagcgacccagagactggtaaaactcatcgggttgaaaaacgtctttaccacaac  
gcattccaccatcgaaaagcaataaccacaaccacatccaagtctgcatggcgtttcgaggtagcttgcgaatgttttgagtgctttcgagcatcc  
aagctgatgccgtacaaaaccttcttctgtttcggctgattagtgatattgatgagtatgagcgggttgaccgttctgtcagaagtaaaagtac  
gagcagagatcttacaacaggactgccaataaaagcggatttaacaattggttttgggaatttttgtgagactttgatagtcgagtggtttgat  
ccagttgcgagaaccgtcctagcagatgcttctcatcaccagttgtttcaacatctaaaaacaactgggaaatgtggaggcttctaaaggaag  
agtgcgagtagacttggagggtgattttgaatttacaacaagcttcatagtgctgagcaaaactgacaggttcacggtagctacagaaattat  
caaaggattgtgaatcaagcaaaaagatgaactgaacaatcaaagaaaccactcgtagatgatgcttccagtgacctaataattgg  
ctgattaggaatcctatacagatatacgtactttcatccgaacagaaaatggagttactgattgaacgaacgaagctgtagcttataaca  
gggtgattttcaaaaacggatttcttctatctcaaaatccaactcaacaaatctacgaactgtctacatatttctaaagttgaatcggcaacaat  
gaatgtttttttttgatggatttctaaagtttggatacctctggtgattctatttcatgacttttctactctccattctgtataaagtggagc  
tttctgtactactgtgaatgttctacatattgtgactgaaacatgatgctatgattatagtagcagacaagagtagcttcaacatacctt  
agtaatgaattgcttcaagtctcttttgatatcaaacctatgttgatgttgaactaaagggaaatgtggagatgaatccattgataggttac  
tttcaattttttatcttataatgtcttagatgaatataattcaatgaccattttccaatttctattcgtatggctattaacaagctctatgctcag  
aggaacatcaataactttcataatagatagcagctcaacagagtagcaaaataaaaggaataaaatgttttaactcttaattgaaaatacac  
aatgcagcaggttgcaataaaaaccaacaaaatacagacaccctaaacataaactttctcatggatttttgagttgaaaaatgaaata  
tatatttcgctcttttttttttttttttttttttttttttttttttttttttttttttttttttttttttttttttttttttttttttttt  
cagtaagcaaaagtaacaaccgagtcactgtgctccaggattcagtcgttacgtcaacgtgggtccctgtacaacgaacccctcatat  
cagtagaatagcgtatgctccattctaccggaatcatttagtctaccataatctcgtatctccatatttataggggaatcagagacctgtcg  
ataaccaaccaaatatctgttatgaatgtaataaaagaaggaatataaaagaaagatcatcgttagactcacctgaaactccgaaggattgg  
ataggaaggccgatattcagattgcgattgtcagcaccgtgacatctcagatggatcatatgtggaatacgaatctcgcaccatgacgttgat  
aaatgaattttcaattgaaaatgaattgcttggagatgaattgctaatacatcgtatgctatagaagcgtctgtttggagacggtattcaga  
tttcgagcttttggtaaagttatgcatcgcagatccagcagcaattgtgccaccaatccaggaaagcaatctttatgtaagtgaatgag  
cagaagctgttcatggactgttttttccaagttcacttgtaacgaagggtttatgggctctgtttgtgagccaaaagccttaatacagtaagtt  
tgcaaaacatcctagaaaagcaaaaatgatgccgatttttgaactttcgctcccgtatgctttagctttttcttctgcaatgtttgttacatccatt  
gcttctgtcagctctgactttgacaaaattatcaattccagcatttctgtggcaggttataatctcctatgaattatcaaaagattctggatcga  
tctcttctgcttccgattggtagtgaaccagaccctttgcgacttacgttctctatgcttttagtaatgtctaatacagtaagtccccgctt  
tctagaagtagaaaaccagcagaagtttactcaatcagttcgcctaccagcaaccctccaccacctctctacggacggacctgtctatccc  
gactccgaagacgaatataacttccacctacatctagcaggttacttttaacatgactcagacgataataacttcttctgcttctgtccaggac  
cctccccctaccttccatcagctattgacggactttccgtaactcaaatcccaaagacagaccgccctgaatttaaagacttaacatcatatac  
caatgaggatgatattgtgcaagttttgcatcacaaccttagtcttccattctactttaagtggaatttctaaaatggaatcatctctc  
caaattaggatctgcttttcttccctaaactgctttaaagcaatccattggcaaaccttccaggaattgtgaatgattgaaattagggaa  
tgtatgcgaaagcttggacaagagtttaattcctctgtgtacgaaaaactaattcagtcgatgcagctggctcgttcagctgttagggctctcaa  
atacaagaatttaaaaatccagcaagagaattttacaggatcaactagttcattcaaaccttattgatccagtagattcatcgtctccctctgctt  
atccatcaatcggtaaactcgattcaacgcgcgttgatcaacagcaaaaagggatacacaattttggaagactacagaatgcaattat  
gactttgttgatggagaacatcaattagtaaggaaacgttgaagagcatagaacaactattgaaaaccaattgaccgtcgaactgggatt  
gcaataataataaaacttatagatgaagagttagaataactataaggtttgtcagagcactcaactaaaagagattggaatgagttcatgct  
tcttttcaaaatgggctcagtaaatctccatcgtatgggttacggacaagagaagaactagaagaattgtcaagaggtatgtgacagctcgtcct  
ttttgatcgtttgtcatgaatatacaccgcatatatactattatgtcagttatgattacgatgatgacttttttttttcttcaatcttttaatacct  
gtttgcatgtatattttatagtttttttttccaataagcttttttttgtttcattaaaaactttgcaattcttctgtagcatctcgcgaaaaaaat  
tggattgttgaagctggagttctcatgttttcgctactattattgaatatggtaaagattacgataattgcatgtacagaagatgtggaatgaa  
tttagtagtaaggtgaatatactttgggaatttttatgatataagacatgcatagttccaaaaaggttaaaataaggatcaagtagagag  
aaagatggtttatatttttggggcagcattaagcaaaaagcaaggttaagctgtatattatcgcacattgacaaaaaacgttggaaaga  
atgtaaaggtccgcaaacgggactagactagactttacttcttgaatcgtatttctctgatttatatttaaaaagtaagtaagtagaaaca

agggtgaaaaccagcatccaagaagataggctgaaaccaattaagaaattagaatcaaagtgtatacaacaagagagatttcttattttttt  
tggtgtgtcaaaaaaaccaaggtaaaaaaagtaaaaagatgaaacaatgcagttcaatttacggtaaaagagatgaaaaaaggaaattctc  
ataacttgaagaagaattacacgcaaaccacgaggaattataaacaataatcatagtcagtccttctgtcgtcaaagcttcttgcaaaa  
gccccaaaccagctgcagaagccaccaaggtactactgatggccattgcagctacaccacgagtggaactggaacagagaccaggttaaggca  
ccagcagcaacactatctccagctatgctttggcgtttgtaaccgatgaaggaattaattccggtgtacacaatggcgagcacaccaagagag  
ttccgacaaaaggaccacgacgtgtgacaccgttcaaaacaccgttcaaacgaagtctagaggaagagatgtctctggtttcttaggcctca  
ttcaaacccatacgcaccaaccgctaagccggtcaaatcagatgtaccggtccgtagcaaagatcgtcttgccaaccacgagaagggttc  
catactatcaccaggcaaagcactcaaagcatcttcaataagcaaataatccaaaggctgtctaattccgcaaaggatgaagcttgcag  
gatcaaactctgattgagagaggatccgaggcagaggatccggggaggcttatttcaagaattttacctgagatcttgattttctttttc  
tctcttgaataaccaagacatgttcagtttgtgattggactcaaaaaagatgttggtgtcagtcggtgaataaccgctcttaggcgtgcta  
gggacttagggccagtttctttgatgaataatgtgataatctactataaaacccttttttaagaaaaaaattacaattgatattctatat  
aatactccctttttcatacceaagagaataatgatcgaagtaaaaatgtagattttatagcgtcttctgtctgttttgcggttctttctcaaa  
aacacatttcaagaactgcttcaataagaaaacgaaaagatggcaaagagcgaagacaaagctcagacactgttctatggtagatacata  
ataatagctaataagtaagagacgaagggaagaatgagaccaaagttacagatgtttaaagacaagcgagtgtaaaaaataatttaagata  
ggtaaagtaataaaaagatcgagaggatgggccttcgggatcagaccattctgaaagaaaaagaattcgtacagaaaagccatccaaaata  
attctaagtgaaggaaggggatctaggatattcattgcaaataaacacaaacagatatttacgagaaaggaaaggaagcaaaggtga  
ggacaagaacaatgaataacgtatgaaaaaagaaaatgaagaggtattaccatcaaagacgaaacttcaaacatcaactcatccgtagct  
ggaaaaaaattgaggattgtcctatttctttttcttgagggtatgaattgcatttccatgttgcttacttgataaaatacgttcggaaagcaa  
tgtaagcaccaatcatagcaacaacaaagatccacattgctggatgactagaaggcaaaaggttagtcaaagcttgccctaacagacttgaatt  
ttgtgtctcaaaggcaaagcatcaactatatttctaaattgactattcgttgcttgcctttggagacctgtgaccactacataggctgggaag  
agtcatacactgtctcagagaacgaccctttgaggcaatcgggaccaccttcagtcctaaagcaaatgttagttagtaaatgtccaaatag  
gttctgcaaccaacttaaccaactgcccagctgaaagttttgagcatttcttgagcatctccgagtgaccgacatctcaaaggaccgct  
tgcatcttgacctagaagcaaaagaattagcaacaagaatgacaaggaatgggtataggtttcagcggaagagcttcagcaggtacaata  
caaaggttccgaggatccaagcaaaaatagattggcaattgagtcctaaattattaggagaaaacactttcatgttaccggtttgtatggtata  
aacaaccttcgacgctcgtcaactcaaaaaacgctgtggttcagtttctctctttccctacgcgaaaattaccgaaacagatcctagtctt  
ttcaacttgccttgttagccgctgatgttgaccagacatatagactcttgccttaccctatttctcttcagcaatcaatttctaccagcaagatc  
aaccaagacttctcaccaccagggtgggcctcaatgaactttgtaattgcaaagacattatccttgacgacgatccaaaatcctcgcgagtggt  
gtgttcaacacttctcaacgaaacggcttttcagtcatttctcaatttcttcgatttcttatggctctttaccgtaaacagtgcttagaag  
caattgatgtaggaaatcaacgagtcgcggtgcttcaataagaggagctatatattccaataacggcttttaaggattaacacaaagtggtccg  
atctacaggtcaaaagtagtcacgcttgaattgcaaggtgcaaccagaatacatgatttaacaacaacacacttttgccagctactact  
tttctacttttctttatggtttgagagttgaaacagactgtagtctaaagaagtaattcacatttgaagattttgatcaagatccgtgtatc  
ttttgtcttctcagtttttgtagatccgctggaattacgcttcttaaaatagtttggcccttttcgagctacgttggcgggttgaggttagtta  
aaaaagatccctggaggtgtcacacaatcgcaataacgctcctcgtcaacgcttctgtctgttgatcaagtggtcgtgtctacgatctgctt  
gtcaaaaacaggtcagtcggtacgtgctatcgaagactttgtgtctacaataccaaaagaatccgaaatgtcgccaaagacaagtacactgat  
tcaccagaaaacacaaggtgcccggcctggtggtttcgcaaatctattcaaaagttcctaaatggaccaaataactcatcgaccaatcct  
gagggttttaatacattaaattttacgtttcttttatttcttatttctaatgataacttcaacctttcttctcttcttgttttgaagttagtag  
cattgttataactcgtttattaataatacaagctttcgtttacaggctttttagaacaggatcttttttgaatatccttacctcttatttttt  
cttggtaaaagagcacatatcgcgagatgtgacaatggaatcgttccaacgctcctaacgtatgcatctatgacaaaacattagtaactttt  
aagttgtacaacttctatttctaccatcgaatttaaaattaccgctcaatgcatccttagcatacagggtatagtggtattgatcatgta  
cccatgatgattatcaacagcgtacaagtcgtatgtatgatctttcttagcttcttctcttaggtttctaaaggactaatatgtgcttgcag  
tccaagttcattgtaggaaaaagtaataatctttctttccgaagtttgcagctccggtttgtgcaactaaaacggttcaaatgtataattaaatt  
cttgtaatttccaaatttccattgtttgtagccgcccggaaatccttaacagatggacaatacatgaatcttcaacgaaagctgttcaggcc  
gggaaaacttcaagacaatcatccaaagtgatggaactcaaatggattgtcgccctcgaaaaatccactattttataaatgctttttctga  
ctgtcttcttccatacacatgataatcgtctggttatttaaaaggcaccttctcgcttactgggtatattcatagcttcaaacttctcaatc  
tattccacacatccacaccaggtggaacattctgaacacaaattgaaacatatcgggagttacaataatgtcagcactatgatagtttgc  
gtactcttataataacttcttggagatataatctgggaaaaagaaagttgcagcggataccgaaagggtcacaacgttgaatgatccag  
gtaattgaggacgactttgagtgacaatgggcgtaattatcttctttttagtttcatacatgaacaagcgcataagaatggatttttg  
gagattttctgctgttcggttaaacacttatacaccttccatcatagatattactgccttaccgactctgtgctgtaacaaactgttgcaagcgc

attacagcataacacttggcttctgcacagtgtagtcagaaggaatcttaatgtcgaactttcgggggaatcatgatctgatataggcaca  
tttacagtatgtctccacttggtaactttggaaggggagagtaaggtacataaaaggatcaaagaccacggacttcaagcagcaagtgaac  
attgcaatgtactttgtacattccttgaataattcaacaatgattgaatcattcctttggaataggctcccagcattcatctgccactttgac  
ctgcaccggatttctactgtacaagtccggctttcaaaataggtttgtgataactctgttcaaacttcatgtaaacgtcaagggaaaatgcaa  
tgaattctgtgaatcatttgaactatagccggcgaaggatgaattgaattcactaacaatataatataaagtgaaggagaaagtgagggtccag  
aaacccattattatttgcctgttttaaaaggtagcataagcaaggaacctttccttctcattcctaaaggattggtggaattaattccccttat  
accgatcttgaataaaatattctgaaagctcgtaagtagtaataagcattggagagcagaattcatatagcaagatttccaatattattatacc  
acagtaaccccgctcaaccatactcttgtgcaactgtctgaggtgaatccatcagccatccttgaattgagcgttttagagttcaataaagg  
catcctttcctcatattcatctcaaacattgtcatgagcggcaaaatcatttaagagaatagttcccttaaggcttctggcataagatattgtag  
aaaacgggtcagatggaataatcgttattataccatatacggatatttaagattttagatataaaaattggtacgaacaaatgaaatagatct  
ttaagggtatgacttctgagaaatggaattataaggacctcgtagtgagagttggcgggaagaaatgagagttctctgtttatcgaatcgcgct  
aaatgaagaccgtagaaaaactaatggggatatacattcacgaatgggtgcaaattgtgttctggtccagtgcgataaactttcgttcaatcgca  
atccatggactccaaactaatgaattgtagcaagattaaaaaatgaagcgtaaacacttcaagctggctcaaattataactgcacagcac  
tacctattttgtttgtaattgtgcaagaatgctatggttataaatagtaacagcatgaaaaatgaaccccttcaaatatacaaaagcatttacta  
gagaaaagtaatctttgaaagacctaccattgtgtagcttttccaggcagaagaagataatcgtatagtaattgattcctcaagcccag  
gtaaaagctggtgattttatccagcaatttcttctctattggtccaggagatggcttttccactcaagaagctttatagcttcaaacctt  
gtactcaatgagatagctgaatcatcggtttccacttatctagatcgccctcaactggaacaaaaactttaaccaatgtttcaaaaaata  
tctctcaatttgcgtaattgttaattctccgatagagcagcagttgaagccattcctcaacatggctttttttttctggttccactcttt  
attaaattcaatatttttagtgacctttatgcaaagtattctggtattttgagggtttggaaatgattcaagattcgtgaaatagtaaagtcgctt  
cgattccacaaactcttatagttccgctgtgatttcttctgttttctgcataaacaactataattattaattttatctgcaaacctagcttt  
attatttcagggtattcttctgctcagcattccttgacagaaagaacatctgtgaacgttttaacggcattattatagactcacgtttatt  
aaaaaagttgaaaaaaaacaatttaatttcttaactttgcatagtcgagtggaacaggaacggggacttaagaaagaatttaaaataa  
aagttattgtagacacagaatagacttggattgaattgactattgattgattgaattaaagaatggctgccgaacaaagaaaatcattgaac  
agcttatgggaagtaacctttcaattttacaagtcgagggcaagttcacttactgatcgaaagtagcagaagttcttatgtggaatattgctc  
catgatattttacaacacaaaaatggatttagcccatgcccaagatccatagtgacaagctgaagtcagactatgagcagccagctactc  
gcatagttatggttacgaatgggactatttgaagatttgaacgacatgtagatgaatgaatcgaagaattgatattgctgaggcaagaaagg  
aaaaaacacagaggaaattgaacgaacggatgaactgatgctgaaattgctcatacagaccattccatcgaagtttgattgaggaaatgaa  
agccttatcgagaaaggagctgtaaccagactatgaaacattatcgagctacgtcgtctgagaactcatagacaggagttgcatcaagaa  
gtgatattcatgaatgaagtcacagctggtacgacacatcaaaagctgcaagtttgatgattgttagtgcatactgctcgtgattgata  
atgatagcagattggcagatcatttctggaagatgcatcttgatgcaatgctacgaaacctggctaaggatcttctgaccagttagaat  
tacaacacttctgataaaaatgaagaagaaggaggactggaagctgagaatcaagaatattggagaacaacattcaatgctcacgtaactgatg  
attctctctagacactgctacatctaatagtatcttcaacttctactagtagggcctctagtagctattatacatgatattcttggatattt  
atggataatataggcatgcatcttctctgttttctctttagacatactccgaagttattttatttttctaataatttagggtttgattttttaaa  
aaaagtagaaatttattcatggcaaatatgaaataggatcaatgatgattcacaccttggaaaactcctaccaaatgtgtacacataaaagttc  
agaaatttttagcttcaattcttttagtcattaagtttaattaagggctgtgagaatacaacggtcataatgaacgatggagtagggccacatg  
gacagtaagacagcatcaaaaacaattaatgggataaattgcaaattaggaaaaaaggtttaaatagttttctttctgtaaaatgtattc  
gactcagattgatgactctggaagacagtttaaccctaagcataccaaaaatctcaacttgatgaatcaagcttgcaaacacacatacca  
tgctcgaacttgaacggggaatacttctatatacaaaaaatgttacggctcaaacacggtcacatacctcgtatacagggcgaaattctctc  
aaatgtaccagtagttaattacgaggctttgagcaaggtgatgacttgcagcttcttctgagcctcaggaaaggaagaagaaggaaat  
tcaaggtagatgaagaaggtttccaattgaacgtcctaaaggaaaaagaattgtccgaaatttgcaaaaaacaagacatacacttca  
agatgaacaactacgcttctgctgtaagaaaggatgctatgttccaatacactagatattgaattgacaatgactttcgttgaggatgac  
gttttgggaacatgaatgaacaggtgatgacaccggatcgttctcaaatctatgtagatttagacattccagcaaatcattggacctc  
aaatagttcaagcattcggacgagattgaagaatgacaccgtagctgaagtagctcctcaagggcaggaaatgctggtcgtgttaat  
attcaactacagctgctgcagcatgcatacaatgatcaggtgaatggaatttaacaagtaattgacaccagaggactttagacccaactgt  
agtaccttggactggcaggtgagttccggcccgaatggcacatgcaatcctgaaaatttacttaagttgaaaaagatgcatggaaggag  
atttaccggattatgataacgattccgtcctggagcagtggtgacctcgtcaggacatggctacaatgggagccttatggcaacctacgttg  
aaacagtaagtttgaagaagcaaacgaaatgaaaccaaaaagaaaatgattcgacaatggagaagagatgctcgaagtttggcggg  
aatgcccagatgttccagcggagcgttggagagcagcagctactggaagtaggtgctcagacggctacgacaacattctctagcctctgtt

tctgatgcgagactctgttgaccaagagcgaccacgttggcgatgtagatgggtcaatgtttgggaacaggaacttttgcgtgcgtcgtggc  
ccggaaggaaacaagtcgctgtgtaatgctgtggtgtgcttatgctctacaggacgttaccatactggagaaaaggattgtatacatagag  
tttctataaggtagatcgctatttctgctgctatatctcctcctccttattactactgctactgctactgctactgctactgctagtctggtataagta  
gatcttccaaaaagaatttaataagataaaaaagtagaaggattataggcaaaagaaaaagaagcgaagggtggataacttaatatgtgatcac  
ctgttttactggatgtggatccatgacgaataacttttgttaattaattattgggtggaatgaatgaactattagagctgctgtatgtgaaaag  
tatatgagatgagattatatacgttattgaatatttctgagtgatcattcgtaatttttgttaaacgctcacatcaaaaggctctttcattattcc  
atagctaaaaaggaggtcaatcataattcttcataaacataacatcgtagcgcaaaagacttcaaaagaaaaaattaggcggcagcaatctttat  
aattcatcgaccgaaggaggactctttctgctgtgacggatatatttcagaacgttgatgcttctgctgtgagcgtctctcgctctagttcttcg  
atgggctgattatcccaatcgagcgaacataagcctctgaatcggttagtattatcacgactagcattatctttggagaaaattcgctcctctcag  
cgggatgctgataagaggctgactgcctgatgttgggaattattgaataaccagcgttggtaaggcactcttccgaacaatggattgt  
gcgtaagacgttacgacacgatttctgagaggaaagctctgaaagtggtaagacgttgagaaaacatgttgatcacaataaatgctaagaa  
acaaccacgtagaggagaaattcacacaaacaaagcaagaattgtataatctaaccctagttagtgacttgaagcaagttcctacaactg  
aagagcgaagcaaatctgactactttgtcaacgtttcattagtttttcttcatacctgtgaataaattgagtcgctaaccgggtgattgagttg  
actctatcctgggttcagttcctaagtaattgggaaaagttgaagaaacaaagctggaaaagcagccttttctatctcgtaactggctacggaa  
gatgacacacattggtagccttatttcataaaatgattcacagatagtttattgacgattcactgtctagggtgattcactagcagaaagtt  
gctactgaaatcgcgatttagagtagcttagtgaactgaaactgttagatgtggcgatccaaaaagcagcaaatattcttaaaaaagaaataat  
attcatcaaaaaaaagaaattcctgtaaaatgcctttgcttttctctctgtagtattcccgttatcattcgaacattgttgattaacga  
tacgggaagtgtgaagaccgtagggttcaggagaacgtaattgatttcataggtcattacaattcgtaaaaatataatgactgttgcactgtagc  
ttgtaattcttttatgggtctctatcttccaaacatcaatcccatatgaaatggatagattcttttatggaacaaaataaacagaaagttca  
tcttaggcgacttaagaatgtatttttcaaggacaactgagttgggtgaaatggtttcttcaaaaaaacaaggatcaaacgaacctcaaattc  
ctcactgcattgcactaataaacaagggtgctggcatatgaaatggaatacaatattaggtgaagacttgagacattcagggttgaattctttt  
ttttctgttctatccttgaatttctacttccggtgttctttatggaccactcttgaagaaaacgaaaaagttcaagatatcaagagagaata  
cttattgccagtttagcgtatgtagcgtcaaaaacccaaaaacagatcttgcagaagaattctatctcaaaaataaacagtgaaaaggcttactga  
aagagtttctgctgcaatattcgattcccatactcttagacttattattgattatcattgacaaccacaaaaatacacagtagttcaaatcttctt  
ttgtaagaattgaagcaaatattcaaggaattttcgtttctatagtgagaatgtcatgaaattgttgcgataaaagtaatttttatattcaa  
agaagatactgcaatctgattttctgcagaaatgaaattccacatttctataaaatggaaaacaatcacagcagtaagaaataggagt  
aaggaatagaaaataagtttgcataaatgcaatagcgggaacccaaacgcatacacaagctatatacaaggtaaatatacacttgaagaa  
taaggataactatacaagagatattgtcatagaagcaagctagagttttaaagttctgtgggaatacataaccaaattgataagtgctgtt  
tgaaagacgacttattaccccaaacatccatcgcatggacatatagataaacgttacaagcgaatcgctacatacaaaaatcattgataagatc  
tcttctcattccaagctcgtgttgggttacgatgccacccttctactatcaccaatgctatttccatcttctctgtgtgggttatacagtaat  
tacaattacaccttcagcggatcgcatataaatcgatttcaaaagctcctgaagccattaggaccagaaattgtatcggatgaaattgcaa  
acgcaacgcaaagactcaactctggtttacaattgcatgttgaagaagagaaatgctataaaaatcgcgatttgtgacaattcatcttct  
ctagaatcccgtataagctctggaggagcatgagggacaacttaggagagattctgggtgtgtaaccaccggatacatctcatcattgc  
aaaaggttcaaccggagctgactattctctacagaaccagataattgttcaagcatgtctaattgttggagaacgagagtaattctcattcatca  
aatgcaggtcccaggtatcctcatgcttgaagctgttcccttctctctggttcagtagcagagtcattagtaggttgagttgattcacaga  
ttcattcattggcgaatcgaggcagaaccaggtcctcagcagtaggcgataacacctcccagttgaaatcctgaagagaatcttgactag  
tagcaccaaatagctgtaaaaattggtttgcagacgaagtgtcatcactacgactacggctggatgattttctagcattaatgcttctagt  
aacattggaaggatcagcaatcaattggtttactaatgaaaccgttcttcatcttttcatcactatattcttgcatacaaaaatgaattgag  
atgatgattaaatctcagagcatatacacgaccgtggtacattgatcaattttatgaaatcggcctcatccggaatataataaaatcctaacc  
caacaactgtaataattaccatagacacaattaagcaactgaaccctccagagtgacattctataaaagttcagttgaaaataaataactg  
gaaatatcattccgtatcgacttcttctacatcttctatccgtagagttctagatctctttccaataaaaaatgaagcaattcatctgtctca  
gctgtaggtataggatactgatggactattagatcgtactataaatgacgatgctggcaaaacacaaaaatacacagaacaaagataaattc  
atcttcaactgctttttgctagtgcttaccctttacgatgatctgcttgcaggattttgtaccaggttgcgatttaacttccagctttcatgctg  
ataattccatatttctgtctgctgattcctcactcttcaaaaacacttccatctttggttttgatcaaatatatttttctgtcaata  
ttgttttggaggttccaggtgttggctttgggtattcaaaaacattgagcatggaggcatgtattgaccacgaaagtaactcgttgaact  
acattgctaaatgtatctaaatataatattctatggttatatttaactatctatggtattcttctttcactctttagtctcgagttgggtccaaaag  
gaacaggttccagctataaaaatatagaagccgttaagttataaaggagattctactggattgctcttaaacagaaggcggatattgaaat  
ccaactgttacgaaagtccttttcatagaggcaaaagaagcgtatcctaatacaggctgttgggtcaagtcgatgagtaaacagactattgattact



aatagttaagagcaaattgctttcaagatacattctgtctctgggttactctacttacttacttctcgcttcacaatgatgctgttcccattattaagg  
cttgccacggcattaaggaataactcataaaggactatgtgtactcaaacttttctcagacgcataatgaaactttacttaaccttttactctgc  
agcttgcagacttgagtacaactgtctttgttactaatacataaacattagcagaaagaaagaaataaaataacagaaaaattctttt  
agtactatattttatgaattcacgaaaatccttgaagcttttctattaggtgttcattatgaagcatttgaatagcatttgcgaattatcccaagtc  
tggaaagaaatgttgcagcttgaatagtagtttacttaattaatacaagaaattatctctgagcgttactattccatttgcataacctttt  
cttgatatttcagctaaaacgaataacctgcatgtcaaaaaatttttttgaatgaaattatgcttgaacaaagcaagaccattcacacg  
tctattaacttcataattgattcttttcatcgcttttgtgacattccttttatccactaccaacatgtcctcgagccagcaagcaaccagggcaga  
ggagcaacaaccccaaacgagctaatagctctcttagggaagcaatggactcatctcactgtttttccaacttctccccggttctactcagc  
atacaactcctaaaacaaaacgcgtacatctcgaagctttttttctgcccggaaacctaacatagctttagtgcgttctctcttttattatt  
gaatctagttcacctgctcctcaggctctcatagctctcgttctatccctcttctcagcataatgatttttttagctgggagctcacagcgaactc  
ctaaatctcaaggcgtggtgatattcattctagtatacactgaaaacgccttcagaagagaagttgatcctcagaaaattggagctgctactc  
ctagcagctgctgttctcgggttcagatgctttaacattcagtcaagcccaacctaccagtgaagccaacgatgataaccattcgtgtcatttgggg  
aacaatgtctcaattcaagaaagtattgcttctttcaggggttctgcgcggttcaagaaaaagaccgacctgaatacagaaacgatcccat  
gcctcctctgatgctgaacaagctgtttatagaagctcttagaaatagcgtattataggttggatatttcaatttggacgtgcaggatttga  
gacattatcctcctacgaaaaagctttataatcagttatactcttacctcagaaatttccaattatggatcagactattaagatgtaatgctt  
gatttattaggaaccaatccccctgaagatatattaatgacattgaaactaaggatctacaaaatccgaccgttatttggaaacgaaccattaat  
atgctgcatttaaatcctggtgacatcgataaattgatatctgttaagggttggtaatacagatgcaccctgtaattcctgacatgaacaagctt  
tttccgatgctcgggttgcggacacagtgctcacagtggaatcgatcgaggtcgattgctggagccagtgaaatgtccaagagaaatctgtggtg  
ttacaaattctatgcagttgattcataaccgctcagaatttctgataagcaggtcatcaaatcaagagacgcctgatgtgtcccagatggtca  
gacaccacattctgttagcctttgcgtctacgatgaactcgtagattctactaaagccggtgaccgtatagaatcacaggtatatttctgtgtgctc  
ccattcgaatgaatcctcgtcaacgaacaataaagtctcttttaaacatagtagacgtcgtccatatacaaaaagcaagatcggaggcgttag  
gtactgatccttactttgaaaacgacttagccgaagacacagctgcacaaattgacgacgtccgtagaattaccgatgaagaagttgagaat  
attaagaaggtcttgaacgaccggttctgatgacttactctctgcttactggcccaagatttatagaaatggaagatgtaagaaaggtatat  
tactacagctctttggaggtaacaacaaaagtttcaaaaagggtgaccgtcctagatatacgaggtgatataatatttattatgtgtggtgaccttc  
aacttccaatctcaaatccttcagatgttcataaaattgcacctcgggtgtctatactagcggtaaaaggttctcagctgttgggttgcagcgtt  
atattactcgcgaccaagatacaaaaacactagctttagaaagcgggtccttgggtcttctgatggcggtatattgttcattgacgagttgacaa  
aatgtcagattcaacacgttccattctcacgaggttatggagcaacagacggttaccgtcgttaaagcaggtatcattaccactctcaatgccag  
aacgtcaatttggcaagtgcgaatccaataggaagtaatatagctcgaactccgggtcacaaaaatattgacttacctccacattgctttca  
agattcgaatttgggtttattttagatttagaccgagtggtgatcttttagacagaaaactcgttaatcatattgtctcaatgtatattggaggatactc  
acagaatgctacggaattgaagtattatctatcgagtttctacaggttattacctatgctcgaattgcgtacatccgattatcacagaagaa  
gcatcaaaaagaactgttaacgcctatgttgatagaggaaacttggagaagacgtacgttctcagaaaaacgtattacagctaccactaggca  
actggaatccatgatccgtttatctgaagcgcacccaagatgcatctctgtaaacggtcagaggtcgaagatgttcgggaagctactcgtttaat  
taagactgctataaaagactatgctaccgatcctgctacaggaaaaatttctctgacctatatacgttaatgaagagaaacacttgtttctgaa  
gatattggttcgagaactgagtagtttggctctacactaactgcaggaggcaaaaacgattatggttagtcaattattaactcgtttcgcgagcaa  
agtactacacatgttgatgcttctgagtttgaacctcactggcagcattagaaaagagaggtcaattgaaagtatacagagcgtgacatcg  
tctagtaagaccgattgctcaaatgagtgatcaattaagcatgacatccttaagctggtattatggatgaacccttttataagaattactgatata  
atcaccgtacgatgtgattcttatttatttattaagaattgttacaactgaaaaagaacattgaaactagatgtaattaattaaattat  
tttgaagcagcatagaactataagttatttagataggatagaaaatcattaggatctgttcacaagaaaaactttaaaccaaaacctgt  
cgacaacaaaaggggaccgaagaaaagagaggaatatatacataaataatacaaaaggctgtacatgtaaaaattcgtagatcatcacatcc  
tcataacgaatgaggtacacaaacgaaaaggaaggtccaaaggtaccttccaaaacaaagtagaagattcagctcaaaatttctggtaga  
ttcacggttaggaattctcagtgatatacaacttatcatcatgcttcttaacacacgtacttgttttctagagaaaggttttctcttct  
cgcacattccatcgcaatttctcaagaacctttgtccattgcttatgtgggtttgaaatcgtggtgaaaggatattgtgaagtacgatggacaa  
gtaatcaccgggggttatttctgtttgctgtgaccatcgacagagaagaaagcagtagcccgagaatccaagggaacttcaatgtttataactga  
ataatcaggaaggatcactggccgaaagatagacagtgaggacaaataggagtaatacaaatagcgtttaaagttaggatggacaagagagc  
caccggcattcatagacatattagtcgaaccggttggagtagagacgattaaccatcagcttgaacgatcgtcattaactctgagttgttga  
ggttcaggttactgatgaaggatgctcaccgctgagacctgaacctttagaacataactggtagatattgagagtagtgtttgtttctga  
atcatactgtgatacgaacattccagtcgagaagaaaagcgtaaagaacactgctgtaagcatgtggtgaatgctctttatattcggtaac  
gggaaaatgagtcaagaatccaggaatatcagagctgagaaagtcaagacaggaggacaatgttttgaataaccaagaggtatacaaaac

agttgtattatcgccaatagtgatgaccatatcaaactttgttggttcactaggcaaataaaaggcgtccaataaccgattctgtcttcgtgcagct  
ccaaatcatgcaggatatcgcttgcggaaaaccgtttggagtttctaactgttctacatacacttttgagtcaggagaggttgaagaaagca  
agtatttcgtaatatctcggtgaaatataccaacgaatgggtccttgggttgacaatgataatatttttgatccccagaaaatataccattg  
atagcttactgtacatagatttcaatctcataacattttctatacagagagtaacaatcttctgattgatttgggtggaagctgcggaaagtcagta  
atgtccaggctctgcgtatttccactactaaactctccacgggagatttaacccagacaagtcaaagttgcaggactttgcaaaccttcattgct  
tctctgacgaaaatgtaagttttcatttaacttctgttcagttctccaacgcacgatcccctcgaatgtcagaaaattcagacatgttcgtaagat  
gtctcgagttccaaaattagacctactttccaagcccttaattatctacaaattcagtaagaattcacaacacagccctcaaattttgtctaaa  
tatacgcttttcttagatatacgtgtgtttttaccatgtgcatacgtatgaattgtctctctataataatgggtaacattgtaaccgggagcatt  
aagtcgtagtattattgtgactttactatacgaaggatgaaatatacgaacgaaaaataccaagaaaagttttcattaacattttggc  
atatcttggatttaagaacaaaattgtaaaagagagcgtgaagtgtgaagattaggagaaattctgaaaaacatggattcaattgtaaaaaat  
aaaggtaatgaagtcgaaacgcgttcagccagacggtttatcttttttctcattacagtaaatctgctgaaaaacggctcaagaaaaggta  
atctcgtgtattctctattgactatgacttggatattgtgtatgctggttctgtagttggaacgattgaagtattgtttcatatactaaaatgcca  
attgtcattcaattataagaatttacgccgtaattgcaatttctgtcacaacagaattcagcgttgagagagctagctgccatttgtaagatg  
agctcatctttcaatttaaaacaaaatcagcaaaaaacagtaaatggattcactccaggagtaaaattaccttcaaagcttacaatttctgtctaa  
ttatctggatctacgaaactttgacacaagcagaacatggtttaattttcattggcttaatttcttctataagatactagattccacttggac  
tgaactttcattgatggccttatgacagaaactctataaaggccaccaaatttgagtggtgaaacaaaatttaaaatttaaaatcttat  
ggttcacaacatgcatcttaataagtaaaaaagaacgggttctttttttggcgattgaatcattttggagaacataacaaaactactatcgctc  
ctactactaaactcttcttacaatatggatccattgaaaacagaagaaaatcatgaaacgcaatcaaagagtttaaaacaaagcaaatcag  
aatgaatgaatggagatccatcagagaaagtggtggtcgatgggtcagttggatgcaagagtaactgactgtaagttagacacgaaaa  
agtgatcagcaaaaggagaagctgagttaaaagttcctatagtttatctctattcttctgagattccagaaaaaaagtggttaattttatcgat  
ttttgctgttgaatgagattgaatgaaattcaaaagaatcactaacaacaaaattaggttgaagatcttgaaatttgaactataactgcaataat  
caatgagggttggaaaaaaattagaagaagctacaaccaatctcaccggaagaaaagcaggctccagtagcctattgcaacaaaagc  
agatgaagaaaaggtttgtgctcattctgcaataatgtactagacaatttcaatttggatgggatggttcaacaagcaaatgatgtcttg  
gatgactagtaaagcaggtagatctccattttaccaaacagcatagcctttcaaaatctgaatcccggcttgattgttccaggttgatgcttg  
agcccctgacttaatagatacagtgaaaagagacctgttcttagcaggccacacattgagatactctcaccttaaacacacaagaaaatc  
atgctgagttcaaaaattatagcattcaaatattgaatttcatctctgattaggccatctactttgagcattacatattttgtcaaaacaaaag  
acagaggaagatttaattgtattttattcttaagtttaattttcagaaaatattttctcattgtatccgggcttaagagtgaattcacctgtcct  
tggtggtccctacttctccaaagtttgcaagttcctacgcgagccatcatcaaaatcgggtgttcttacttcaaatcacccaaaagagggact  
tttagcgtttgatgaaaagaattgattcctaatgattttggaaagaatttgcgtcttttcggccacaatgatgggtttcattccatcgactcgctc  
atggttcataatgccagttcaacagagatttttaggaagaatcaaagacatgttgaaaagaaaaacaaaaggaaaagaacagattccc  
gagaaagatctcctacgttagagtagattttcaaaaaaaagaacgcgactcgaaatggaaaggacagcaacttttgagaaatttgccg  
gtgaaaaacttaaaaaactgagagcttctgttctcagggaccttcttctcgaacaaattacatgctccttggctccagaagatcgtttgcgt  
gctgcaaaagttagcatataaaaagactggacacattgttatgatttccattacaaggacttttaactgggatgatatgtatcggtactacgatc  
ttcatgttaaatatggagataccactgtgcgaggacgcactactggaaacctacagaagattgatgcatctcaaatgttgttttgatgttga  
taaaaatgggtttccactgaagatcaaacacaggaaagccagtgaaagcctgagtcctaaacaatccttttacttcaacattttgt  
gtactagcatattatcttacgcttaataatttctctctgctgtgtttcttttagcctattttactgcttataaaagctaaccctcatgctcctc  
atatgttgaagtttctgactccatctccagtgattcttctattaataaaataaaattgatactcgagaagcaaaagttcgccattgtattatt  
gctagcaatgctttgagatttcgagaatgagtagctcaaggtaatgttccattgcaaaagtagaaggaggtcttttaaaatccatgaatata  
aaatagtttaataaagaggaagacctctgatgttctgaaatatacagctcaaagctccagctcaactcaaagctcgttctacatctgtacaa  
agtaaggacagaatcaaaaataaacgttttcttttctgtttaaataaaaattaaaagttcaatagattataaaattcattctttgcaaggga  
ctttacttgaaactaactgacttctactatactgcttgaatctaccaccacctcactttcagcgaagatttaaatctgcagccatggaat  
acttaacaaaaagaacaagaacaattttctcaagtattagaagcaaaagcaaaataaagattatacgaatgtaagttgtgactagcaga  
gattacagaatgatggaagcttcaatcagatgaagaattgacggtagaagcaagaaagccatcatctagatatttttcttaaaaaaaggag  
tttaactgcaaatgatagcagtgccgaggatcctagttgaaagtgaaattcatatatactgaccagcatatagatgatgttaaccttagtca  
aggatgtttcaatgactgtattcttattcaccagcagtaaaattgggtgaaaggaaagtgcatgcttactagatgcccagacaagttttcaa  
gcataccagcgtgtcgtgcaaaagattgcagagaataatgtaagcttatgcaataaatgtatcatatctgcaattgcacagagtcgctcgac  
tctgattccctgtgagtgctggtgtacagttcattgattttgtatcaggacgtgatgaaaaacctgaatgaagatccagcattaccacaatttc  
ttagttttgatcaattattagggaaaaatgcagaaaacaggattcgtattttcaacttactgtaattgtcactaatccattcgttt

gatggctctgtagctaacaacatcgccaacacattcaagctcggattatgcgagcttctgctctttcacttgtgacttgcctttcatttgcattca  
gagtgagttctgcgtaaatgtcaacactttttatacggctgattcaaaaagacggaacactcaagcacgtttctgaatagctcaagttgtacaag  
aacagtataagtagcaggacgattgctcaagaacgagaatgctctcttcgtaggcttgcgaaagttaaaaatacaacacggcacatgcg  
tggaacacaagaaatcgacatttgaatactgaaatctttcatttgcctttcttttatacgtaaaatcggtttagtccccaaggtagtgctgct  
gtatagcaattggtagcagctagtagcttgcgaaaggaactggctctctcctaagtaaaaagggatccaatcaattctctcttttattact  
taacatttaacattgaaaacgagcctgcttattgtttatggctcttaatagacgtaacatgttactttagttgggtcggagagctttaccttc  
tgtacagacttcacgtagcatcagcacaactctcgttctcgaacagatctattggctttctcggcataatagcatcttactcctctagtttt  
tctgtagcagctccatttccgctagaatgtctgcatgaacaaaaatcgctttgggtgctttgtgctcttttctgctttctctcggcaatcgg  
tgctttgggtgcgctatcggagatgtaacaatctcaaggtgtcaactatgtacagatgtaaatgcttctggctccttaccggtcatata  
ctaacgaattccttagctgagcgtgactagcaacccccgctcgtatttaaacggggcgaagcgtgatgatggcctaaccatcgtattctact  
actgaagacaacgttgcattgttaccgacaagattggctgattttcgggagccaatagagaagtcattatccctatagtttctgtagac  
atccttctacgacgtaacaacagccttcgggatcaatcgggtatggcgcgaagaatacaaacgcaaattgatggaaggtagctcatccact  
cgcatctccttccctacattcctttgctttagtagctgttctagcttatttgccttgagcatataaaaaatctcaagtgctattgtttgagag  
ctttcgcttgttgcatatttatcgatattttcatgattgtgataatttgtgtaaaatctttcttttcttattcactgtcttttattcattcactgtat  
gattttattcaacaaggaatcaatattgacattcatattcttttcttagtttaattgtccagaacgggttctgatgttctttctattttttgtt  
cacactctttataaaagcacagatgctcttttttctgtaggtcttaataatgaaatttattgtttatttctatttctattgttattgaaatatt  
ggctatcgtaagacaagatgaaatccttttaatatagctggttattgctgttctgttgcactattgaaactcaaggaaaagtagttactaaat  
gttagtgctttctcaacataattaataaaaattaataaattggatgatgagcggatccatcaagataaaaggcaaatgagtaaacttcttgg  
gttgttccatcatgtaatttctcctcaaatcaacagcaggaaagaaaaaacagatgcttggcaaaaggcgggtcaatcatcttccctcaa  
tttacttgtaaaaccaagttcagagcaatacaataactattgtttactgcctattttgtttgtttcatttaccgtctttctactacta  
aaccttgttatttcatattgtgctccttaaaactcattaacctacataatgccccaaaacgactaccgcaaacgggatcttaccatacagct  
agctgtagaagcaaaaactggccacccaacagctaccggcgggaaaggagagaacatagagaattgctgaagaaacgcattttgc  
aatctgaaccattcagatcaattcctcgaaaaattggttctgattggtaccatattatagcattttttgattctcagctgacttagaaaaag  
tcgcatagctgagcgcgaattgtactggaaatctatttttaaaagcttttgttttcttacttttcttaactaatatagaaccctttc  
aattcagtcagttcccactggaaatcacaaggtacttttcttctgacttaaaatcacttgccttctcattgcttctgactcaacatttttattagc  
atacaggcgaagagcgtatcctaagaaccttgaatagttatatactggttgccttccctgttttaccgctctcttcttttctgactacc  
cagcagatctagttctcacaactttgttctttgtataatgcttggaaattgacgaaaagtagtgatgggttttcttgttgaattgtttct  
aatccttgattttcagaataaaagaaacacatcttgcctccgcatcggattgaactcagtggtcgcataaaaggttgcgaaataatgcgca  
ttctcaacatcttccaaaaatctagcgaagaaaatctgcaagaagctcagaagaccaacaatcccctcaaagtaccgtggtcagccagggtt  
gcttcaagtcacaattattgagccagagacttgcgcttgccttctggatatactccaagtagttatacagcatcttcgggtctactcctagtagca  
atggcttgggtcactctcagatctcgaagtcagctggttggctaccttaccatctgttagaattgacaaaaatgaggttttgggtgagctcgaat  
actgccacttagaaaaccaagatgggactatcaagcaactttgatgtttccgatattcaaaattatctcaaacatttatctcggctcttctg  
agtcgattgagaaacgggatgggcaatgacgtgttttgggaggaataaagctttcctattttattgttaataaacttactgatgaatgggttc  
ctttgagggaggcagcggaaaactctgttcaaatgctgtcaaacgcaacaaaatccccttaccatcgatgcttttgacctttaaaag  
ttgttgaaaaggctcttttgaaaagttatgcaagttcgaagcgcgacagctacgtatctatgctttgaaaactattcgaagacacattgt  
ttcaaggagtgaagttgaccatacttggctgaaagaactgtgctggcacaggtcaataatccttttattgttccgcttaattctcttccaatccc  
tgaaaagttgatattgtttggcattcgtaaatgggtgagctattccatcatctacaactgaaggttgccttggcacttaccgagcaagtttt  
acacggcagaattgctgatagctctgagtcctcatgaattcaacgtcatttatcgtgatttaaaaccagaaaacatccttttagactacaggg  
tcatattgctctatgtatttggttatgcaaatataatggccaaaacagaccgcacaaacagtaagttttattcttagctttttgattctgcata  
cattctcaacgtaaattagctttttggcaccacagaataccttgcgccgaattgcttttgggtcacggttatacaaaagtagttgactggtgg  
actttgggtgttactttatgaaatgattactggacttctcctgtttatgatgaaaatcctaataatgaaatgtagaaaaatattacaagatacgtt  
acgcttccctgataatattgataaagacggcctaactgctatgctgcttattgactcgtcgcgggaaaaacgactaggtagtcggtgccc  
agagataaaaaacatcctttttgcgatattgattggaaaaagcttgcgcaaaaagatccagccgctttaaaccaagtgctgactctgc  
tatcgatacagtaactttgactcaggtttactcagaatccaatggatagttgtgctgaggttcaatctgtcggaaacagtcacaaca  
gtttgagattggagctatcaacgcttacaacgatagatgcatctgatgacatttcaacaattggtcctggaagcataactcggtagtgactcgt  
atatgctgtacctgttcttttttataagattaccacttttattgttttataatctcaactatcgaacatagctgtcgttccagcaatcattcgt  
ctcagcacagctattttcttcaaaccttagaatcattgtatttaagattatgaaatctgtaccttgaattacatggtatttttttatata  
aggaagaaaccttaagtagcattgatcttacaacacgctcgttagaagataatcgtgcatgaaatctatatgattgtgaaagtgaatttt

aacagaccgtagaagaatatagaactaaatatacatgggaagttttgcatccaaaagaagttaacaagtattgctcaaaagaacgaa  
cagaaaattagaacattagagaaggggaatgtgttcgagtaaggtgcagtgatccaattaaaccgttaaaaaaatcgataattgtctacctt  
tgtgtgatcgacgtgcttaataagttgaatagcatcgtctttagagaaaggtttttgaaataagggagcagaaattaaagcgtattttaagcc  
aaaaaggggttttgggaaaatttgaattgcagacataatgaatgctcctcgtcggagagaagatgacggtcagcagaagtaggaaatgagggga  
acaggaatagggttgggcaaaactttgaaatccccgaatccgaaatggaattgggtgggtctatagaagttataggttttttggcgtattaac  
cactagtcgcctgctaatacaatctatgaaaaagttagtaataatggttgcataaaagaaatcttacctttgcttttctcgcgttgggt  
aacgaagtccttgctcaagggtagtaagccaacctgcctcctcctgtaattctgtatgcttttacaagagcaactgttcaataagccctgt  
aaaaacgttcgataatcctcctcctgaaagtactcgagcaaaaactttgttttatttagtagcagacgttcttcttagagagcgttttcattagct  
tgcaacctccggaatctaataagttatgagtgaaatgactgtttcctgattgcacgactgttagacgagaattataaataattcatcatagtaa  
gctttatattgttcttctgttggattctgacgcatctcctcaaagttcatatctttgacagagacttcggcttcattcatgtactcttgatcaaatt  
ccaagcgaccaggcatgtatccttgaatttcatggcactgtggggttgatgtaacggtttgggggaaatcgctggaggaggttgaattttgat  
gcgagcccgtttgttcagaaaaggctattctgtctatggatccattaaactcactgttggaaaggggatagtttctgttcaacatatgtttat  
ataatgatccctacaatttcttcgtacggcgttctacatattcggcgatctgaccagttcccaaaccacgtctcacatgcatcaatca  
gcaaaagcttctcatctgacccccagttctgtaaagataggaataggaattcgtctctataatacगतatggatgacttggtggtggttgcgaa  
ggaagctccagaagtgtagcagggatgcacaaatcaaaatcggcacattccgcgatctaatgtgaatcatccttgttatcttgtgcacatac  
attacaatgatacttttagggcgcatctgcaggggagcgaatcttctgttccactatggaggagcaaaatcccgtggtacggtcaggttggg  
taggagagatgaaaacaaataaactcgataaattgtaagaaccctactaggaagtagatagaattactcaaaaagagctgccgaattttt  
gaaaaaatcatggtggaaaaccagaaattccgatcgggaattgtcaaccacaaggcaatcctgatcagacttcgttttaaaaacggcc  
aaaaacaagtgatccctaactctatcgtttttcatgaaaggaccaatcttcagacgatattttgaggtttaccagaaatctcaaaccaaggtga  
ggagccctcaacttaaatgagtcctgtagtttgcctacgttccagttcgatagaagaattcttgatttttagttttcattaccgtatagaactg  
aaaaaaaaaaaaaaaaaaaaaaaaaagaaatgctaaaagaaatatttcaaacatactttacgacgatacaaacctctataggaagatattt  
actgaattaaagcacgttgccgttctgtaatgagtttctcgtgggtagcgtacaataaccctacctatgtggaatggtcagtaacagcagtca  
cgtactacaaacagaaaaatcacagaaacgaaatcatcacaggaacagaaatggttaaggaacagcatgctcgatttcttagaacgttgaagt  
gtaactattaaatagggctgtgacgtaccaaaactacgaagagagcttctcgcgtagtgatcgagaaatactatcctcgtctcacgttggactt  
ccaaaccaacaagagaattgtcgtagaggtcgtattattgttccaagcgttctcgcaacaagattgtctggttacacgactcaccttatgagacg  
tattcaacgtggactgtcgtggtatctcctcaagctcaagaagaagacgcaacgcaaggatcaatacgttcccgaagtctctgagcttga  
aaaggagaagcttaacgttgaccaagacactaaggacatgcttaaggctcttggtctacgactctattcccactcttgcgtcaaccctctgctcgt  
cctgagcgactttccgctacaagcactagaggtttcttagatgttacaatacaattgttttgaatgtaatcattgattttcaagtgttttgatt  
tgtatttttaaaagtctgtaaaaagttgtacctttgtatgctatagaaagtttttgaagcattaaaaacattgtatgtagtagccgttttgg  
ctgctggatgtatataattgtatgtagtagcgaactaatccatggttaattgaaattcaaacatgcagcgatattattgtctagagcttattc  
aacgtctattgacaaccctcttagagaattatgagcaatgaaatcttctgttttaaggccgagtcctcccggtgtcaatttctgtttgattctatct  
aagtcatttcaaaagtagcaaacagttcccgtcgaggaacagacaaagcggaaacggcatgcttctttgatgtaagagcccagacaggcctgccg  
tagaagcaacaacagcattccagtcagaaagtttcatccaactttacacttttagatataagttcaagatctttctcgtgactgctgtgggtaat  
gggatggagtaaacctttggcattcagcagcaatcgcttcatcaatgtctccagggcgttctgtagcacttagcaccaggactctagatcacct  
gttaaaagaccatcccacatggacataaactcagccttaatttagccatggcttcatggctgtagctgtcgttgcgttaaaaaggaatcaatt  
tcgtcgtatgaagattatagaggttctaactttctagcaagtgaataatgcatccacaagcttattcagactctcaaacatttgcgttagaa  
ggcctacactcacgttgatgaatgtagcattgctttgtttgccaaggcctttgccaacatggttttaccacagcctgggtgctcacaataggag  
acccttgggagacgataaaaaggtcgcatgtgtattaaaaacttctggatatttagtggaacagtagcttggaaaagatgattcacatgctc  
gtccatcccagcaatgctgcaaaagctacattaattcactcggcaagactagctgagacgccaccatttgtctgactcatccaatcaactgtc  
tcaatttctcgacatgttcttctgccagttatccaatttctgcgactcttgaacagtgcttctgcttttctcggtaaggatctaacgaagaaa  
gaagcttacgagctgcataccaagaacagccgaaagcgaataaacagcgatttcttgatcgcttttctgactgggttcataggaact  
tctggagttaaaattgttctattatattcagaacaggatattataaacgcagagtgatgaattaaaccctcttaagatggaatcaaaagaat  
gacacagaaatgtaataaataagctcaatcttctgtttttcttctcttttaaacaaataaaaaacgctaaattgaaaaaatgaattgt  
gtgaaatccagctcttgggtcatcaaaatgtaaccgacactctcactctgttcgtagcactaagtttattgaaagagctgtgggtttgaa  
gacgagttgaaataacgtatgtagaacataaacacataaacagaagcttgacttcttgaatcaataatacagagatctgaaaagaaaa  
gtgtagtagatggaaggtagtaaaataaataattctattgtttctagaagattggatttctttatggatctactgtttaaattcgtatgtgaaaa  
ggttcatgaactttggctcgtttctgcaacgatcgaatttgaagatgacttctagtaaaacaaattcattatgtctataaaaaatagcatg  
aacaataatgatggattcgttcttggataattgaacaacgagaatattccataacgctttaaagtggaaactttctgagaggaacgaaaaaa

gaaaaagataaaaataatacacgtctgttcaaagcaaaattcatctcattcatggcaaatgtcatcttcgagcttcaaggacaaaccgatttgc  
tcatttgatcaaacaaaataaacgtacaaaatagaagccgctctacttagagccagagatggacgaagatggagtgcccttcactg  
gcaatgccttcttcagaatcggaatcagcattattggatgggtgaagaacagctcgaattgttgatacttgaacgatctttcaaaattctctc  
tctgtgattccattgcagctcgaatctttatcttctctcaattctgaatagcactttcaatgttgcaatggatctatcaatggtaatggat  
atcgtaattggaaagcaacgtaatttggcacatactcaattgttcattctcgaacgtaacctcttgccataataggcttgcgaatcatcatat  
tcttctgttttctgttctgctgcaagaagtaaatcttctcaagtgtaaatcttctcattctctgctcataatgttgctctttacctcgtta  
gataaatctcagaagaataagattattacgtacgggttgttcaattcatctgatagagattgacttcttgtgtgagtgccaattgcaattgt  
agacgaagccaaaaggcagacatggcagcaaacctctacgtccaaatcttagacttgcttcatcagacatctcgtttgtgaaccaagcagcg  
ggtgatcaggcgcgtaaaaggccttctcaacatctaaacgcgaacgaattgagcttctgcttctgtaaccatgaattcgatgaaaagataag  
tttaccctccatttcaaaaataaactagtaatttaataaattgaaagatgcaaacgaaaaagaacgtccaaacttggagtcggtgactatctt  
cggatgaagtagagactccaccgaagtatactaggaaaagcaaaagcaaaagctaacgttctgctagaacgcctttttgttaataatgat  
ttaccatttccaacaaacacctgtgaacgtatttcttggaaaatgtgagaatgcagagaaaaatgcgcaagaactcattggcaaaaatcct  
gtatatgattatgccttcattgacgcttctagtgtatgttgaagattcacacgaaggaaaaagatccgatgaatgattcaattcctaattgttgcag  
cggaaactaacttccggtgaacgcagattgtatccgtaaagcagattatagtgctattatgcgtgcttgcgaactcattggatggacaaatga  
aatcaaacgacattacatacagaagtcattttactcagctcctaaacagaggttcttctacgatatactgctcacttatacaactcggctga  
cacaacgaacaatagatttccagcgttactgcaatttggcatgagtgtaaaagtcacaaaggcttgggtggaagatcaacggcacccttca  
gaggtatggcaaaaatgttcatacaaatcgaataggctcaggctgagagccattctattctggaagactcatagtaggattcacttcatcaatt  
taggctgaagaagggcacagctagacgaaattgttcaaggcctcgtcttcttttagtgatgaaacatttcaaaaactagctgacatgaaggt  
gataaaaaagggtgagtcagtgaaaccttttggaaatcttcaattatggtttgaaactacaagctcgcgagcctgctatgcagcaaccctt  
agggtccatctgtctgctattgctttacgaggtactcttagtttgaactgaagcttactatagaaggtggattgcaatttaaatgacctct  
aaaacggaacctttatacttttataactatatactgtgtgattgtacctgcgctgactgttcttctcagtaaagcttgcgcaaaaattgg  
gaggttctgtaggagacagaagattggaactaaatgggaaaaacaaaaagaaaaagaaaggatagcaagaaggttagctgtctatgcat  
aattgtttgacagtttcttactttatgttatttatacaataaccaccttcaattttttcttctgtaaattagaatttcttaatgaaatctatca  
aactattgtttgtaaagagaaaaagtgagtgctggttatctgaaatcttcaaacacatttcttccacttaccacaaactcgtttatgtttcaa  
aatcttagtttagggatttccgctcattttacattttttgattgtatttctccatgaaatcaaacgttggctgtgatccttactcttga  
tagtaaaaatctgcttgttattgagtgattatgcgctgtagctgaacctcatagagactgagaggttaaagcatcgtcaatatttgcgctgt  
tttaactgcttgcgaaggtgaattttattgaaattgcgtcgcagtgccatcaccgttaggtgaagtcagaaaaaatatagcatagtaact  
ttgctatacctcatacgtctcttttactcgttttctgttgcataatttgaaggtcatttattatgtgagaatcgtttgctattctagtcgaatg  
actgaaagcgaagaaagatccttactcgggtatcggggcagattacctctatccagtggtcatgaactgtttctcggattccatgcgagta  
attgagaagctgaagaacaatagaggacaatgaacatgtagatgattcagaaattataaacggagatgctgattcattaaatcgaagttga  
ggatccggatgattcaaacacaatacaagctgttgtgatctatgcctttagatttgaaccttgcagaaatgagcttgggtcttcgagg  
gtcaaacgttatggattcttgcgaagctagtcagctggctagtcgctttagatgagcttctggaaaaagcggcctagttctgagcttactgtt  
actttgatccaataattgtctactttttgttgttctacttatggatgtctatgtatattagttacttaagcactaatctgaaaaatatagttt  
gtgctatcccgttcttcttctcaaacgtaactccttttgcgctttaaactgctatttgcgctcttttgggttatccgagcatctt  
gtcatttctgttattcaataatattaatagattgtttgaaaaatgatggatatttgcagctcaatcaaacagagaaaaagcaagttatgtt  
ttgttctgttttgttgaaccttcaatagctttacatctcctaatactcaaggagaagggttagaatgtaccgtgttttacgggagttctttcctgt  
agagttacaatgggtgctagaataaccgtaagtcagtagcatatcaaggctgaattacccttgggtgtctccatttgagaacggacataaaaa  
ttctgaaagttttgaaaccgtagatgggttgattgttttgggtcccgcataagagtagtaaaactataattgatacatgtgaatcacaagc  
aataaagtggaattagccttatggctatgagcgttaactaaccaataaaatcataattactcgtgaacgtttaggagagatcagatctaca  
aggctgaacgcttcttgggtgtagcggagtgaccttctgagcgttctgctgcccttgcataccaagaaagatccttaagttgatgggatcg  
gtcttgcacaatagaagtaaggatcccgcagaagaacgagttcagaggtgagtaagtgatgtgagtggaaccaaatacaactttgacaat  
gcttctggcggctctagtcggagtgaccagtcagctggatgtcttgggtacttggcgttgcacgttaagaaagagattcatcatttt  
tgttctctagtttaattgggtcttctgacgaaacgttcaatagcatctcgcgagtagttcaaccaatgatcgaagtttcaaaaggatcaattg  
gacatcgttcttctggaattgttagttgatgtcttaggcaaaaattgaggggttgatggcaatccgttactaaagaacacaggttcaaaaa  
aaaaaaagaaaaaaagtaacttactcgttggctgatctctgttcttataagagcatgtccaaaccctttagatcagtaacagaat  
ttcataacataatctgaacctcaggatcaaaactagcctgaatgaaatgatattatggcctcgaattgagtcacgtagacattaaaggcaa  
tataataacaggacaaataagaaagaaaaaaagaaaaaacacagcctattcaggacctgattgaaatcaatcaatctttggatcctcaat  
gatttattacgttaacgcacaagagttacttttaagatgtattcaaatataatcataggttctttgaaaatttaataatgcgacaaaaataag

aaaaaacagaatatttgaacccaatgctttatatcgtcccaggatagtgccattctaggaatacgtgaaaccaaaggtagtgaacaatg  
gcttgaagggaagagaagatttgaagagacactagagggttcaagtgatgaaaacaatgaaagatgaaagaaatgagttgccgtgtag  
cataagattgaatgaaatcatcaaaatagaaaattacaggtactgttctttcgttcaattggtgctttgctacttagctactttag  
ttatgtaaacaactgaggaacgatgttcttattgagttgaagagaagcatatggaggaagataaaaaaaagtaaaaacagtaataatcaa  
gtcataatgctgaaatatttcgaggttgaaggctctgctgtagtgtttacatgttcattacgtcttcaactattgtttacagatgtacaaaatgt  
ttgactttttatggctaccgaaatgtttgtttaaattgttgaacgttcttttctcatatttaacgtattcttactgctgttttcatgatttactgac  
ttaagctaagcactttcttctgcaaggcaacgtaaacataactaaaattggagcgggttttctgtaaagatgtagaaagcgaagcagctcaaa  
ggcttggatTTTTTTTaaataaacaataaatacagcagcattacagcaatctaaaagaacagtaaaaatagaagcaaaaaggaaaaa  
agaaaaactatgccccgaggagtcgaacctggaatctcctgatccgtagtcaggcgccttaaccattggccacgaggccttctgttagta  
tacttgaatgctatgcaacctgaagcagttgtggagaagaggttaagaagttccagaataagcaggtttatgaaaggttataatgcttaatg  
aacatcgtttcaattgaaagcacaaggattcttctgtaattgaaatgaaatgaaataactatgggcacgtatacggaccattctccaatttg  
gtaaactagtgaacgctgctcaacaatgaactgatcagataatcttctactaaattcttctcgatcatcttctttattatgaaggcaaa  
tttattattatataagtagatataatcttgtgttcaatagcgtactttccatacccacaatacgtacagagaagtacacgaatggtagg  
atgctatgaggtaacaatgttgttactagtcataagaatatcgaaagtataattatgtaattgctatattacagctttaaattatgaaacaaat  
aatgacatctttaaagcagaatagctctaaaagggttcaattcctactgtgctcttttctgattttgttcttaattgctgtttctacaacttct  
agtctgtattttgcatatcttctgcttcaattggacgcggttaacaaaattgttaacttttggtaattgcaatactgctttattgcttctcataa  
gactgagacgaaaacacagttgccaattcactcttcaattacagttgtggccatttcatcaggtttctgctgctttaaagattgggtatcgttt  
ttgtaaagccttagcatttctgaaaagggttaggttctttatttttaattcttttcatctttgttactctttactttgcttggccttgccttttc  
ttgattgtcgttttaagacaatattggttaccgtcgtttgagccatgtagaggagatcaatgacctatggagattgattccatcattgattc  
tatcaataaagatcggctgaaaataaagggttctgctcgttccccatcactatcacaagcttaccaaattagattcaatatcgtttgcttctc  
ccaaagtacaagagatcctacgacctcaaggttattcgtagtgagatacaaatcttcttctgcatcttcttctgcaaaatctcttagaagta  
ctttccacgcggttctcaacatcgtactacttcttgggtggtgctcaagagctggacggttgaatcagaactcagcagcttgtgggta  
cttggccagacaagctcagatttctgctgcaatgcttccagccagccttcaacctacgtgggtcaaaaattcacgaaagatgcttcaaat  
gagtcgggagataatgagatttagattgctgtctgattttcaagatgaaaactcatccctgtcaatctttgtcggatgataaaaacctatgca  
ttaaagctgccgttcatgctttcatcaaaaactcctcaaatccataatgcgatatctaatctgtaatgctttccccacatagatgcgtcg  
gttccatccgcatgttggagcatccaactatggaaatcgacgcttctctcgcgcttcaacgcagcaaaaagcttctgcttactgaaaacattc  
aaccaagcttagctattgacatgccatggatgcatctcgcgacaggtccacttgggggtctcggatgcgcaacttccggctgaacaaaacaa  
agtacacgaccaatcccttctcaatcgttccatatacttatacattgctgcaaaaggaacaaatttacaagccgctcatccccgagctacta  
aattaattgaccaaattacaaaacttctagtggaagaaacagcgtttttattgacaaggattttgaccaaactatgggacgattatcgtctggctat  
gaaaaagttactagcttccagtttccaccagaaaatattcatgacgtcgtaaatgaactctatatccactggtacacttcttgcagcgggtac  
ctgccatcaagtgagcgaatctctaaaagcgaagcaacctatgggacgagtggttcatgtgggcagaaactggttggggaaggacct  
agatgtcaagaagattgactgaagccatttttactggcaaatatctggtcgtcctgagtcgcaaggaaatcttgaagataaagcttccga  
atatgttgttttagagaagaaaatagaaaaatggattcaacgatctatgcgaccgcaattttatcgtgaggatgaaagttactaaaactta  
agcatttgaatTTTTTTTgctcctcaatcatacttcttacagcaccattaccattgtaaagcggattggatttctggatcatttggaaactctcct  
tgaagtataacgctgcagaacgcttggatctgatacgttttgacagaattctgcacattcttctgacaagtcgtcgtatagatcccactcctacta  
aatcgggtgtagcgttcttgcgacgggaacggcaagtgttagatttccagatggacaagatccactgttcttccccaaacgtaattgag  
gatgaaggaagcatttccacaagctgaatccaggtatgaggagctccgtgaatgtttgttcaatcacttttgcacttactgaaacattttgatag  
ttaccaattggcttattcttctgctaaagtgaattttggttacacgtccaatggaccctttgtattttcacctgtttgacttctgtaaatcgttcttaa  
accaatgtaataattcctttttaaaataaaaatagtgattttcagcacgaatcactttccagtttctgtatctttaacaaagtacaccaat  
ggagtaggttggtaaaggaatacacttaacgaatttaacatatcggtaattttaaattaccgataaataaaaagcatcactaaaagagatac  
agtaaagcacttggaaatgctaaatgtcctttgtttacatcttctaccaagtgtcagtttcttctaccaacaacgtttattgaaaagacaaatcgt  
tgctttatggtgaggaagatggaatctttaaataatgatgaaactcatttttgggttctctttttctattgttttggacacggaatccatttaca  
ccccatcaaaagggtatgggtgtacatttaaggctgtttagccagtcgtctaaacttttaagaatgcttttatgaaactttaggcaaatgata  
aatgtcggttacatttcaaccaacttgggtggtgatcagctgtttccttaagtgtctataatcctttaatcaacttatgcaaaaagaagaacct  
agttctatgtcacagtattcgttactgttaagaaccaggaagatatacatattgcttgaacgtaagtaatgaatgacaactttgacgaaa  
aaaaaaagtgcatggatataaaaaggcgtcttttcttttctgggagtttgaagtcattatggcactatgaactaactcttgattaaaggatgct  
tttgataatgaagctaaagaagttttatgattcatggtatcatttatgtttctgatgaggatttagaagcgaacaatccttgattggaaaagt  
acgcaagcttcaagatactttccaagtaaagtttgaacaagaatataccttctgctgtaacgtgttaccgttaacaccgcaagagta

tgaccgtgtaaatggaggatattctcaactgttattttactgtctgtttgtggttccaaattatctactgaaacgtcttttgaagtgaacgt  
gtgtataagctctgattttacttacgactaatgcaagctctgtgtgtctaaaaaacaagcaaaaaatacatttcttgagaaaaggattat  
ctattccatctttacgaaaagaaactgaaatattgtgggaggaacagtatgagaacgtggctaaaggaaatgccgaatttctctcacatgggt  
gtataggcgttgataattatgttcatctattagcatctgtgttcatttttattcttcttcttaattatgaaacttttgatgtgagtaatacatat  
catttttttcaatctcatttgcatttctctcacctcattctacgaaacgtagcaacacatattggagcagattgagtttcttataatacatccc  
gaaattcggttcttggtttttttttaattgttatgtgattgaaccatgtctattgacactcaaactgaatacaacaagttgccttatcgagg  
ataaagactgacaacaaaataaaaaataacatagaataccttcttctctatattgttttctctgctgattccctgcattccaatgccttcttatggg  
tattcttgattgttacttggtaactgttactcctgtaaatatagatggcaaaacttttctgtagtgaattaatccaattacaatatgcctcaaggag  
aaatcaagaaaaagggtccaaagaatactaagaatgcacacaaaattttaaacagaagaaaaatgaaagaaaggaggttaagtctccgat  
gttgctatatagttttgttggcaaaactatgtgtagttgtaggttagccattgctgtttttatgaaaaatgctgattgattctatatacgaaga  
aaagaaaaggaggtggcttggctgtacagctcaatactacatacatttttctactcaaaaaactttgctgctcaaaagcttatagaaatcat  
attaacataatctagcccgttattatgctcctagaaaagctgctgcagttaaagatcatattgccaatgaggtatgtacttggagttattcttccggc  
tgtctagttgaatgtttctgactttttcaattagggtattagcaagactatcaattctcgcaatgaacgcattggctgcaggacttgcagctcaacag  
atgggaaaaataacagttacaaaagcttgggagatgctgcttcaagagttaaaagagcagaagcattaatgagctgttcaacaatgtttac  
aaaaggttttgggactggtatattgtaataaattattgattcatatttccgattatttaacaatctgccaaggagaaaaatacatatatttctt  
ggaaggacaactatgtacatgattcaccaaaataataataatacaaaaataaaatcttttaactgtgatataatgccaatgaacctcataaac  
gcaaaagacaaaggataacataatctcataatctcagatctacgaccttgttgaaccaggtggcctaccttgggttgggtgaggctgac  
agcagagcttgttctgattattgattgctgcatcgagcatttccattcttttccaagtttcaaggaaatccgagccttgaataattttctcgtt  
ggactgttactccttccgaaatccccttcttattcagaaaagctgagcagctccgtgaattctgttctgaaatcagaagactcatctagctgttctt  
ccatggccggttcaatttcttcttctcagtgctgctgctgatacaacattttgcaaatgcaattcttgaatattgggaggttttgaacttg  
tgaagaaccgtctgattttggagatcctggagacctggcgatataattgttgtgtgataaaagcaatgttttgaaaacattttgatcggatctga  
caggagaggaagatttctttaggattttaggggaagtgggttagaaatattttgttggccaacggattttgtaaaaggaaatcgggatcttgtt  
aattccgggaataattttggaagtgaaggttttgggactgagagactggaatcgttctattgatttctcatagaaatactaaatagatcgtt  
aatattaaagcccgttgtgtatggataaacgagctaaaagtagagaattagaccatattctatacgcatttctgtaagatggatcatagtaaatt  
tggcttccatactgaatacaaggttggcaatgtatttaccgacgcatgttagcttgcagacttggcaaagcaatttgggtcaggtgtaaatagg  
ttgcacgagtgctgtttacgtctaggtcgggttccaaggaatctaataactgaacaactatttgggttggaaaagtttttctcaattggaagaact  
gttgaactttggtagttgttgagattatgtaacgacgagtagcagggcgatcttataagcaggtgtaaatgttctataggagtaaggataact  
ctgaatttaatttcaaacgtatccttatttggcgaagcgtaacgtccgatacggagctattaagacgggtcgaacatacggtttccggatcgc  
cagttcgtgaacacctaagggaagagcttcatatggtagtactgaaaaatgtgttagtaaaactgtgaagaaactagtaagaaacacttccatcct  
tggaaatctattcgaagacatcaagtaatcgtaattttcaacgaaggacagttcgtatctagttatagtaaaactatgttaaatgcctatt  
tttgggaagatcacaacaagcaaacatggattacagagggaaaagtaggatgaagcaaacgaattctcatctttatgaaagaatgacaacg  
aaaccattcaatccattcaataatcgtcagtgatcacaacatgctagacatattggcgaactttgcaagaccgctgtacagaatgcacagat  
atgtattacatatcttaattgacttaccgaaggtgatcaagcagcgaagggccctccttgcctgcatggtcgaagaggattgcaacatagga  
atccaatacatgtcctctagaggttggaaagcattttgtaagaagagaaaaatcttcaatcgggcttttattatgaaatccaccattccc  
tatactatacaagggcctcctaacaatggagcatgaagtataaggctgtctgtttatattccacaagaaaacgaataatttctaatttccggggtt  
tcaactaatttcaagcaattttcaatataatgttttataaaagcaatgtttataaatcatagaaacacgtaacttcttttgcatagattgtgaattg  
gtaataggtggtcagaggttctgtctacttgaatatcgtaaatagatattcctttcgacagaaaaatggcttgccttaacaaacaagct  
tcttaaaattttaaanaattgacaattgcgatgcaaaaagctcaatatcttctttacaccgaactcaggcatcataacgatcattctgtaaaa  
aattggacgatccatcaaggcaaatggagtaatggaagtgaaagcaaacagtttagaaagtttttaataaataatctttcagttcaattg  
gtaaatcctcaaaatagctactattttcaattaatgtttattataatcatattaatggtaactgaaacgaaagatatctggaagagcag  
ccatcgttttaattgtaattactttgttttaatagaaaataaaacaacattctattttataatacaggaagtagcatctttagcgtgtttctagt  
catttgaaggtttattttaagatagcgcgtggactttaccaacacatttctgctaaagatttggtttttaattacattttgctttgattatcta  
aaaactaaaacatgtaggcctgtttctatttgaatccggtttacttcttgtttacggctcgttgttactcacaacatattaccgtacaaaag  
taaggatcgctacggtgacaaatcaatcgtacatatccatataatattaacgagaatcgggacagtttgaactcaaaagcgggcttctc  
tggaaacttcttagatccgcgcaaaacgtaagcagatgaagttttccgcacaactaaggtaacagagtcattacggattaaacagaggcga  
aaaactgtaatcaattaccgaaatataccatacttacttgaattgcctttgttcttatttctgaaacaaataaggtacttttgttctcatac  
gcaaaccttctttatgtaattgattatgatgaacatatcctccataaactctagccactgagcgtcttccggcagcagcgttctttgtttt  
cttttctgttttaacaataatcttgggttcttatactttcaaaaaatggcgcttgcgatcctagtagaagcagtaacatactgtacc

cgaagtcgtcaggggaacgtaaggggtggttcggaggagcattgataggtaaaaacgcaatagagtcgttctctccgaagaagactgtcgaat  
gagcggagcacgtctcaaggcatctcctaataatgtgactgtcataaaattatataataatgacggacattgacaaagttgtttgctacaaa  
cattagacacaatagtaaataggctgctcctcgtacatcttctcgtcggtgtaactcaagatgaacggctctcaggagctatgaagaagattgt  
tggcgctttgaacgagaacaagctcaacgttgacaagtcgagactgttatctccctcaaaactgtacctatccctaccctgagcaagccgt  
aaggatatcgggtgttggtgctcaaaacgttcatgacaagaagaacggctcctacactggtagaacagcgtgaatctttgattgacgctggtat  
caactacacctgactggtcactctgagcgtcgtactatctcaaggaatctgacgagctcgtcgtgacaagactcaattcgtattgaacaaggt  
cttactgttgcgttgcattggtgaaaccttggctgagcgtgaagccaacgataccatcaaggctgttcttctcaattgaacgcttggctgaca  
aggtcaacaactggctcaaggtgtcgttctatgaacccgtctggccattggtagcggtaagactgctacccccccaagctcaagaagttc  
atgctgagatccgaagtggtgctcaagactcggcgtcaagttgctgaaggcttgcgcatcatctatggtggtccgtcaacgggtgtaact  
gcaaggagttcctcaattcctgatgttgatggcttttgggtgggtgcttctcaagcccgaattccacaacattgtcaacgttcacactatct  
aaacggaatgaattgttagtacagttgttaatttttaagtaagtaaatcgtgctttgatattttgaagctttaaatagaaatggtagcata  
tataatccgattgatgcacataatctttgcttacataatgtttatgttgaaatgtaacttctaaacctcagagagctgttagttattgtaagtgcg  
tgattagtcttaataatcttcatgaagaactgctttcatatgtttatcttattgtgaatcctaaaatgattaccgtatcaaatatcgtaatg  
accgtgacgtaattcctactgcaaaccaataataaacaataagaaaagtgaagaaatcgaccactacagttgttgaccattgtattgt  
tttcagcactttaaacaatactgttttaggctcattcatcgttggctgctgatccacggcttgttctgtagcccaactattacagcaagtc  
caggaatagcttctgttccagtgagccatctataatgtatggccgcaaaatcgatgtctatcttaacttgaagctctagtagatgcca  
ggatacgcagcccgtaaactgtctcacgatggcttttgcgttcaaccaaagctagcttgccatagattctgtgtaaatagtcgctcatttcaac  
gcacaagctcacggatgatggcgcattacgaatcaatccgggtgggattcagtaactatcaccagccttacaatcgaggtatttctggaaaacc  
tcaataaccacctgattgtatgtggagcttcaagcttcatctgcaaaagcatgatctcttaggtagagagactacaaagttaccatcctataat  
tttcttctctgtttacaagggaaaaccttaggggaacacttgaagccatcggtcacgaatgtccgaaccttatctcaaaacgcaaagtc  
tttggcctttcttcttccctccatcccaaaaaactggcttcatcaatctggatggaccagatacggtttcgatgataccgtggaacaagtccttat  
cctaaggaagccatgattgttttgacgttgaagtttgtataaagttcagatttctgtccttgcggtgctgcatctccgaggcatggtactgc  
tggctgtcgcggtggtgcttaggcgaaacagagcaggtatgcacacttattcctctacgaccagaggacatctcattgtcggctcatcatcagt  
tttgaccgcaaaagaatttgcaggaatacaattgaaacggccaacaatgccttcatcgataccatgtcgtacagtagctacaatggaatg  
tgttctgacaaaaaccgacttggcttaaggctagaaaagctttagacaaaagtgattaatgaagataacggttggacgaaaactcttctca  
gattgagtctaattatcatgattatgaacaggaaccttggtaagacacagctctgtcaattctctcaaaagcgtagcaaaagttcattgtaat  
atcgaaatgaataaagacgtgctgatataatctctgaacttgataaagggtaattttacagcatttggacaggccatctctattgtctctg  
atgtccatgccacataaagctatcagaaggtcttccctcaatttctgaagttgtccacatccagtaacatttgcagctatgcttctcatgacta  
ctagctttctgcccagtaataaactctgggagcgttatcaaaaactgaagattgcttcaaaagcatgtctaagcagccaagaaaaacttct  
ttattatgtgaacagacaaaagaattacaggaagatgaaagcgttgttctaaagatccatggtgctgaactagattggagtccttgaagttg  
tatcgtaaagccgctaaatcaactattatacctcctgttctccaaaatggtacaaaagtagtatacgacaaaaattacagaaagcgggtgttctg  
acaagtctcgttgcacctatactattgcgtttacagtgggaaggacatccttagtgggtcacacgttcatggttgggttttggagtggaaaag  
aagtctcaagaacatattgacaacttgtgcgctaaattcttccattgcatatgtgaccacaaaaggacccgaagttggaagctgaaagttat  
gtatacttaaggttccacacaaagatggcctgaagctaggtgagcttctcttataaaacataccaaagttatttgaagaagggattctta  
cctcaaaatttgaatagcgaagaaagccttagaatgagtacgtcgtcttattggcgtagtcacgtgatcgaattcagctcaaatggttaa  
tttgggaaaaagatgctgatcttgacttaagtctcagcccgatggcttgggattattctcaagattattccatgggtactgttactaggcgt  
gctgtcgagaacttggtaacggcctctaagcctcaaaaaaaatagacttggctcagagctaaagctatggtcgtgctcctgaaggatatacg  
ttcgttgggtgatgtagattcagaagaacttggatcgtggtgctattgggtgactcacaatttagattacatgggtgctactgctcttagttggatg  
acttgggaagtaagaaatccgaaggtacagatctacactcaaaaactgctgcaatcttaggtgtgagcagagatgctgcgaaaaatcttaatta  
tggctgcctgatggtgctggattgaaacatacagcttactcttaaaacaatttaattcttattggacgataaccaggcggctaaacttagctaaa  
gccttatataagtctaccaaggtgttgcctctgaagttagtaagcgttggcttctatgggtataccagaacactatttttggctcaaaaggaagtg  
aaagctcgttttaacaaactgcaatcgatggctcaaatgccttccccagaacgccgctgctgaacgcaggaattactcaagccttaagcaca  
agaaccttagtaaaagttcattcatgacttctagggtaaattgggcaatccagtcacagctgtagattattgacattactcgttgttctatggag  
cattgacacgtaagtacaatttggaggctcgtttatccttgcggttcatgatgaagtcgctatttctctcagttagagacagattccgtgttgcg  
ctgccttacaggttccaatttggactagatccttcttctgcatcattagggttagcgaattacctcagtcggttgcattttctctcgttgg  
atgttgatcatgtattaaggaaggtgtaagatggactgtgtgacccatctaaccgacacctattccacctgtaagaaatataatagatg  
ccttgccttgcagttgactgaaaacaatcaatattggagccattgaacgtctagaagtcgatagtttcaagaaggtgaaagtatattaata  
aggaagaggatttaaaggcttggcatacttaaaagccaagctttcattaacactgggacctgcaagattatcctcgaagagataattatga



aattattgtcattaaaattcattatattaaacatcttagttaacattcggattggggcttacacccaaaaggtttagtataaattaatagggatcac  
cggcttttcagttcataaagtagcaataaaaacgattgtaatgaagaagtgagaataaaaattggaagatggtagaatgcgcaaggattagtt  
attacatatatgtatatacatataactccagataaaaaagggtaaaccgtaaaggaaaaaacagacttaatgagagccaaatactccggt  
agttctgtcaagagatgtttcagagctgccacccaaaggattaagatcttcatcatcactcggaaatccattggccttattgagagtaatcaca  
gtaaatatgtactttcggatttctcaaatatattaattcagcaacgtcttgatttctgtgataggataagctttacaggcttatactccatgttcg  
agttgtaaatcgtcataaccattaccggaactactgcccaacatcttgaccagcgatggatattaccgtgacgcaatataatgggtccctgcattaa  
aaccttgtttcatcaagcatctgtacagatgttgtagcgaggaagaatgtttgtgttcggagggtattattattcagtggtggaatggatcctt  
gatttctgttctgaaaagccttgaggcttcaatttcccaattgtgtcaagtcatacaaaagggtacaataaaagctcggaaaaccattttccgtc  
gaagagggacatggggattattgggtcgaagaagaagtagtttcaagatcgtgtcagagacaagtcacatccggatcgctgtgtggtcagg  
agggaggaaataaagcaaagcgtaaaggatgtcgagaaaatggagctcggtaagcagttgttctgtaaggctgtaccagcttcagctt  
cgagattcgaaggggcaacgaatcgtataatcttctgttaataacaggtacaagctagaacagttagataaatcttgcacgttctgaaatca  
ataaaaaccatacattttggagatttctctttataatgtctacagccgaaatgtcttgcgttggaataaagcttctttatactcctaaacctta  
gttagaaaacagaagaggaaagcttttaaaaaacctttctgttctgttaaaggacaactgtctctcgaagtacacccataaatgcttgctt  
ttctaagtcaataggttagtgattgtaaacctttggaacagttgaaagtaacaataaaatagaatcctcctttcataagaagcagcatccaaaa  
agtatgggattcaactccgtgaacaaggttactttctacctagtcaaaagagcataatagaatctttagcgaattcgcaatgaaacgtttctaa  
ggaaggagaatattgaacacttttagcgtacccacattaccggatgcgtcttaaatcacagatactgtccaagctgtatctggactgtctacg  
aacataccgtagtagaatgacttttctatcaaccaacctgattcaactcgtctaatcttggagtcgcttcttcatcaaagctggattccc  
ggatttcgcatggattcatttctgttcagcaaacggaaactctacgctcatttccgcttcaattgattcatggacaagttctttacgatgatttt  
ctcaaatattcctttcaagattgctttgagaatgtgaagtttcttactattgcagcgcaggtgtatgacacaacatttacagctctatagggatt  
tcaacgaaggtaatcagaaaaagaaaaatcagacttaaaaaaatctattatgaagaaacattgtttccatgtaacgtttgtctgagct  
cccaagggtatggaatctatagatgaagctgacaagctcttggcatctatgaaaacagctatttgaagaattacttctcgatgagtattaaagg  
tgaatgctgattctattttgttttcttttttcaaggatttgcagaatgctgccgttagtgattcgcagattacgagagactgtaaacaa  
actattaattcatgaagcgaatgaaaacggattcaaaatataatgtcaacgagtgctgaagaagaccttacttctgacgtcattgagcaaa  
gaacatctgctatttaattaggagctgttttaaaagtgtcatttcagccctcacgaaatcctatataagaagaggttaagctctataaattcaa  
acgtattccttatgcataacgatgttgcaatcttctgctaagcatgactggataatccgtttgaaatattgaaatatttaaagctcttctgaa  
ggtaaacatctggaatagcgtgaaggaagagattgactggatgcagcatatattgaaaagcattacaatagtaattcacggtcacacctaggc  
gaaaataccagttcccgtccgatcactgcagtcagcgtctgagggcttctgttagtactatggttgagataacataggaatccgggggtctgtag  
gctacttcttctgctcttaacttcttttttttatacgtctacgactattgcttgcgatcgttttctcgaagaatcttgaagctgt  
tctttacaagtgacaaaagactaattacaagttcaatgaaaagaaatgaaacgatcgtattcaattgcaattaagaataagaataataggaat  
aataataaagaacctagtagatgccaatgatctcagattacggctccttcaatgctcggattgtatgcatgccttctattgtccactttctt  
cgccatttcaattcatgttggtacaaggatgagtcctgtagtcaaaataaacacaagaacgcttagcaaaaggatataaataaatacttatccg  
aacaattgcttgaatgttatcttttccacttagtgacttctgatcggaaagagtaagactcatgagaaaagaaaggtaacaaattagcatta  
actttgagttgtaggattgcttgcagctctatttcttctgtctgtagttgtcggcggaggagctnnnnnnnnnnnnnnnnnnnnnnnnnnnn  
nnnnnnnnnnnnnnnnnnnnnnnnnnnnnnnnnnnnnnnnnnnnnnnnnnnnnnnnnnnnnnnnnnnnnnnnnnnnnnnnnnnnnaatcgtt  
tctcgaagaatcttgaagctgtcctttacaagtgacaaaagactaattacaagttcaatgaaaagaaatgaaacgatcgtattcaattgcaa  
ttaagaataagaataataggaataataataaagaacctagtagatgccaatgatctcagattacggctccttcaatgctcggattgtatgc  
atgccttctattgtccactttctcgcatttcaattcatgttggtacaaggatgagtcctgtagtcaaaataaacacaagaacgcttagcaaaag  
ggatataaataaatacttatccgaacaaattgcttgaatgttatcttttccacttagtgacttctgatcggaaagagtaagactcatgagaaaag  
aaaggtaacaaattagcattaactttgagttgtaggattgcttgcagctctatttcttctgtctgtagttgtcggcggaggagctagtgcatcatcc  
ctttgtgatctgggaagcgtaggcgaaccggtgtttcagctgagctctcaaatcattccaaggccaaaaacagtaattgtataaattccc  
aaaagatagaccaacgaacctcaagcacttccaagaccaaccagataaagattataactttagcggcaatccgtattgtcaatagaa  
aggccaaataagtgctaggctttattagtaacacacacacattctaagcgtttgctattaacaacaatgctccacttaccatagaaaagagcaa  
agaatattgccatatacagaacaaatgcctaaaggtccaagaaggccaaactgtatccattttccatataactgtttcagaaaagaaaat  
agttcgaacgataggagattgctaattgcaaaaggaatgataaaccaatatcaaaaagaaaacatcgacttacttttaacgactacatttc  
agggaaataatgatctgtcttctcctaaagtcggtaaagaaatcattgaagctatcaaatcagtaattatcgttttttcttgtttggttggc  
agaagttgaattggaagttttgttatgtctttggtgtatacaaaggaagtccttctcaaggtcaacattgtaaacattagcatggttgaagcag  
gaggtcgttgaatcgaattcagctcctttccgacatctaaaacaataaagagaaattcaacgaataatagcaaaagagagtgcaataa  
aagctatcgatccgtattcgatataaaaaattcgcaaatgttcagaagccactaagaaggcgaatgaaaggggttagctcaagtagactc

aatttcaatatttcatctaaaatagctcagactttaatcaaaatcagcccagttggcaggaattgaagaataaacagttggctccagcaggaaa  
tctcgcatcttctacgcaacatttttagctcaggatagtgatatgttcagttgctgctatctctataatgacataatagcataaatcgttgaatatacgtt  
taagtcacaatgaacaagtaacaagtttcgtaatctcgcgtttgtttacacctctgtaacaaagcagatcccatttctctatgaacttatgaaca  
attttttaccttgaaagttagtaacagcctacaacaaaaagcagccctcatgggctcttcaggatcaannnnnnnnnnnnnnnnnnnnnnnn  
nnnnnnnnnnnnnnnnnnnnnnnnnnnnnnnnnnnnnnnnnnnnnnnnnnnnnnnnnnnnnnnnnnnnnnnnnnnnnnnnnnnnnnnnnn  
caaaagagagtcaaataaaagctatcgatccgtattcgatataaaaatctcgaatgttcagaagccactaagaaggcgaattgaaaggg  
gtttagctcaaagtagactcaatttcaatatttcatctaaaatagctcagactttaatcaaaatcagcccagttggcaggaattgaagaataaac  
agttggctccagcaggaaatctcgcatctttacgcaacatttttagctcaggatagtgatatgttcagttgctgctatctctataatgacataatagca  
taaactggtgaatatacgtttaagtcacaatgaacaagtaacaagtttcgtaatctcgcgtttgtttacacctctgtaacaaagcagatcccatt  
tctctatgaacttatgaacaattttttaccttgaaagttagtaacagcctacaacaaaaagcagccctcatgggctcttcaggatcaaaaaaac  
tataaattacttcttgaactgaaggaactgtccacggccatacctaggcgaaccaccagttcccacgatcactgcaattaagagtctgaggg  
tcttgaagtaatatgctctgagacaactgggaatccgggatgctgtaggctcctcaattttatttcttcttctactatgtttatttctccgtt  
ggttcaaatttggttcaactccattctgattaatactttatactatgctgattctgtttcattagtagaatggagaggggatgattcaccatacat  
tcaggaatataatagctcgtagaaaattataccgctatcttgatgattccctaagtgtaacgctgattaaatccgtttacagactcgattttc  
tctatttctacttattaccattgtttatttacgacgcatcatatacctataagtaaggagtagtggaaatgatactcatggaaccgaccaatattct  
cattatattacgacgtagtcaagggtccatgattgacgaatccgggagctaacctttaaaaaattctttactagaagaaccatccttctctc  
gatagaacgatagataaagaattcctaccgagttaccgtaaaagaacataatgtaacttctacaaatgacgggtgtaacctgaaatccacc  
atggaaagtaacatataagttaaagttcccaataaaagttcgtgattgtgagaaaaatccattgatgctgcaagattaaaaataaattggttgc  
aagcttaacaaaaagatgcctaagaggcgtttgtgatggagtaataacacctttgactcgtcgaagtccatcccattcgatcccacgtaaa  
aaggtaccatttataagtaaacctcaatattaatataatgcaccaatgccaaagttcgtgttactgaccgttccatagcttgaaggcc  
aaaaataaaaaataaaaaaaaggtacaaaacctcaacctgagaacgttatttaagatccatgttccaaattaacatttcataacagtaga  
cacaaggcactttcgattatggttagaaaaagctttcataatatagtgagaattcacctattttcttgaatcaattaatttttggctcttctc  
tttcttcaaatttatcaggcgcctggtccatgattcaggtgtaagatcctcagctcaattgagctttcatcatggaattcctggtcacgtgtgcaa  
agatttctgtaacgattgatcaaaagattacaacgctttgctccagacagcatttaatacaaaaagaagatcataactatactccttgataat  
cggaggaccgtatttataatattatcgataatcgcaactgtaaaagttttgtgactgattcgatgaatgagccatatgaaattggttccgat  
agtaaaatataattccaattaggaataaagaattgttgtaaaaatgtttgtatacgttccatataatccttataatgtttactttggatattcaata  
aatgaaggataggaacaaatggacaacaataacaactaatgtttggattataccaataaggagcaccatacgtatttgttattggagatg  
ggacgagcaatccctaagtaaagcgtgacaataagggtataagaagaataaaatgaagatcgaatgcatgaccacaaaagaaaagaaaa  
ctttcattaagaggttaaggctagttggatttcaaatatctttgtcacatcaataacagccaaaatgattattccagtcacaaagcaagtgaa  
tattataaaaagcaatgagtaagacagcatttgcgagtgacacagataatagatgttatggaacccaataatccgaaaagggtcatcagct  
ttgaaaagatttcataaatgataacttgtaggagcagagctaacaaattcagatccataatgggctcttgattaaatccatatcttctgaata  
atctatgtcttgatcctagaagcaaaacaaagatcataaggtatataagttttatagacggttcatcccgatcgtttcataaaatattcct  
gatcaacctttggaataagttgttgaaccttaccaaatctccatcagaatcaatggcagctttataagattaaaggatctgagatttcttctgct  
cgccagtaaacagaccctcgagtatttctttaaagcttatattagcagtgccatgttggccaatcaccggaagaatgtaagtaagcacacgaa  
agaaaccagtttccataaggttcattttaaagtctaatagaaaaaacactgaattgatgtgcttaaatgaactgagacctgaaacattacttt  
ctgatgaagcggctaaatatttataaattctataaacacatacagcttagcacagtttgataagaatctatccatccaagaccaattcatcttga  
aaatttaataaaatatagaatagacagccaagaagcataaggcatgaagctttgaaacaagaagcgaagagcacaactgtgaaattct  
caagttattcagtttttaacccgatctcttcaaaaaagcaaaaaacaaaattcatagggaaaaacgctgtatttataatttgatagattaag  
taacaactgtttcaaaaatcatgctgaggggaagcagcgggttagcctcggttaaaaatagctgtctatgttagggcagatatctcacatc  
gcgtaattataaaatcgagcggaaataaacaactcaaggtgtactgtgtatacgtaaattggacgaggacaacttatagcaattagtagccgg  
ccattttgtagtattttttggattactaataattcttccaccaatgactgtcctataccggttaggattggaatttattatgacctgattaccata  
catatatacttgaatagaatccaataaagtcgatcactcctaaacaacatactcataaatacattataatcgatagctatcaattcaaggt  
cggatagcacagttggctagtgcatgactgttaatcatgaggtcgaggggtcagctcctctctgaccgttttttgaattacatatttcataaat  
atgtcttcttaaaacaagaaatccataagaacccgtttcattactatttcttctatcgaatcgttacattcacaattaattttagtgacaaaaatt  
tctttaaagaatgccgtactacaaaacatattaaaagttaaaataagatcctaataatgatggaaaagacgcaagggaaattcagtgtaga  
ccatgccaaattcatcagcagcatcatgaactgcctgtccataacacttccaccagggcagcaatgtacttgacaccgctttgggagagtctgt  
aaatattatcgggaaaaggaagaacgcgtcgtagcgaacgacgtcattgagagaagccaggaattcttggcgttcttgggggtgtagagg  
ctcagggatggattcaaaaacagactcccattgttcacgctcactgcctcagaaggaacggcaccacaagacatacaaatcgatggcattagact

tctcaggacgcttggcagcttcttgaattgcatgcctaaaaccttaggatgatgacggaaccaccagttatccgccttgtcaccagccaagcggt  
gcaatgaattctagattgttgaccagcacccaaaccaacgaccataccatttttagcatagcagacagagttgctttgagtaaactcaaagcggt  
agtagcaacaacaaatcaataagagcagactgggcaaactctgttcttactaacgactttgtcgaaaagtgaataatcaatctttgcatgatt  
acgggtgctgttgaactgataccatagacttgacgagctcaatctcagcaggaacataactgggatccatttgtaaaatacaatattaccacc  
cttcttttctcaatattcceaagctcaggctcaaaactggagcaatgacaccgtcagaaaactcacgggaataatcagagcagtgacac  
gtcaacctgtcggagagagcaatgaaatcaccgaaggaagacatacgcagcaccacgggctctagcataagcacaggccaacggagtca  
actaccaatatacactgacaaaatagacactctttcgacatccgataaaggaataccaacagcagcggcaggagatacatgcttgaagga  
agcagcagcaggaagatcaaggttctcatgaagctcctaacgagcggccatgagtttaaacatcaagcaaattaataaccgggagagcca  
ccaagaacctaaaggaaggggaccatttccatgaaagcctgagcaggagattggtgagggttagcaccgtagcgtagagtcattggctga  
cacaacagagtattgcttgggaagtagtcagtgatggccgaatcataggaagcggtagaagcaaaggcctcaaagcgtattgattctatcc  
tcttgcgtaatgtattgtaagcaacttctcagcaaatataggatagctttgggatcagttaaaatgtgacacgagcatggttcttagcagcag  
cacgtaacaaggtgacaccaccaatgtcaatctcctcaactgcttcaggaatggtgacattaggcttagcagatagttcccgggaagggatacaag  
ttacaacaacgagcgtcaatcttcaatagtgttcaagaaggtcctttcatcagaaggtatgtcacgaccaaggtccaccatgaacagca  
ggatgaagagtcttcacgaccacctaagaatttgggagcattctgtagggagagcgtctggactccataccggcctcacgaatcattcta  
gcagtaccaccactaccgagcaacttaattccttactcacaagtccttggcaaggtccaacagacccttttatcgtaaacactaagtaaagca  
tacattttggcgtggttgaacaaactggctttaaacagagtattggttacgccaagttggatgaccatgtaatttttctttatctccattg  
tgatagcaggtcacactatgcgttgttatcagtaaatcaacaatctgatctatgtactctgtaacgttacttttctgtttgcaaggtaaaaaca  
tgcaaagtgaagatctaaaatcgcttttctcaacgtcatgtattcactataagacttttactacaagatcatttttcttaacagacttct  
aatccttaagcttgccttagctcaatgtaatgttaacgagtttagctttagctgagcaatattgaatcagattcaatcatgatttagcata  
gaatatttggaaaacatcatcagcaagcatcaaacagcttataatggtttgcttctcttttactatgtctaaatgaacacaattgacta  
ctacgtccatagatccctatagcaatccaattgtatagcgtaaaacagtaatgatttttcttattcatagttccgcattatctagcaaatgt  
taataatgaagatgataaagagcaaagatgcaaaatcaaaagatcagttattgggttggcttccgtgtcaatcgtcacaatttcagatag  
ggcgacacaatgttgcattgtaaagatttgcacgcttttagatcattacctgtgcttaagtagatttagtagtacttttaggca  
ttatatagatttgggaattcaaaaacacctcacaacacctaccctacggatacattaaaataaaaaattatactatatacaacaagccaacggaa  
cgacttcggtaaacaaatcggaacgaaggaataaatggtgaatatggtgctgtaatttatcaacaagtttaaaaaagtttgcctcagcag  
tgactcgaacactgggctctgttactaggcaagcgtctaccactgagctacaagacttcttgattgctgatttcttagaatatccaagaa  
catccagagtgttggtgcaaaatcagtagtaagtgaaatgtttatgtctgctgtgaagttacattacagatatcgaatgaataaattctttaa  
attgttgattaccatgttccaggagccagctacattgacgtttcaatcagaataaggacaactaaaatttaggtgaagcaaaatgattatatta  
tacctttatcaatccgtaaaccacgtaaatacataattagctgtgcaaaatgcatactgcgcatcaaatcaaaaacctgcttaactttttat  
ttggcagggtctggcattcgtctgtagcaagcagtgaaattctttcaccgtttctagcaaccttttcttctcagctcatttgcataagtgca  
cacagacgtccgcatctcttcttcttggagagtcgacggaagagagggtgcttatcaaggttctgcatccagagatgaagttctctacatc  
cgtgatagtgtacagctgccaagaggtgaaatgaataagcattcagaagccaaggtactggtaactatacggttcttatgcttacgagcttt  
gaagtgaggatctggaagcagaaaaacttttgtgagctgtcctttcgaaaaaatttgtaagaactttgacagttcattctcaaacaga  
aatatttttaaacctccaacaacgggttctcatgttctgctcggtaacgaatggcctgaatctttcctcaaaatacggtgacctgcttgaat  
ttcattcccagaaccaaggaatcggaatgaggaccaagagctacagtaagaccaccgtaaccagccaatgtccacgatctctaccttt  
ttccagagtcttctgggatcagggtaatatggtgtccaatccattttagcgggcttctaggaactttttttagaaatgaaacttagaaa  
ggaagaatccaagaattatgattaagcttgattgagtggtgactgataaaacacttactattccagttcatgatcagacaaaacattagcat  
gagctcttggcgaataatcttttcaacaagtaattagacttcaagctgaggaattagaatcaatataccattggtaaacgtccttctacacca  
cctccttgcgcagacttcttttttctggcttctccttccagttgaatctgtccaggagtttctgttctacagccatattgattattgattag  
taggttactactacaaaaatggaaaataacaaggcagattgattttgaaaatttgaagtctactgtggcagcaagagggtttagggtc  
aacaagttatctaagcgagagtacttaaatattaagaaggaaaagaatttcaaaaaggaaagtagtaggatgaatgaacaaaaaaaga  
attgtaaactttaggatattcattaggaaaataactaaattagctactgtaaaaaataaagaatgcgttacaagatccagagcccttagcgg  
cgcccaaaataagctcagcatttctcattcccttctgacttggcggcaaacactgtaggccatcttgcgaaccttctggcatctcg  
atccatcattgaaggtctgcaccaccaaggagccaagctgtcttgttgatgatcaacaagtcagattctgtaatacaggaccaccttacg  
aggaatttgcaccgccagagacatcaatgacatagataataaagctgccaagttctcgagaatagtttagcagcaagattatgcctcctgattc  
aacgagcaagaggtcagcttgaattcggcatgaagttcttccaggcgaccaagttgcaaaacatcttcacgaatcgtgcatgggggagc  
caccagttcaatggcaggtaccgttctgaggcaagctttgttctgatcaaaaattcttggcttccagggtaaaaatgctgttgtaacgac  
tccgatactgtattttaggctaaatgtcggcaagttgcaaaaagaagtgtgtttaccggaacctacaggaccaccaacaccgatgtaaagc

tacgtcttgaagaagtcggttattgtatgtaggaagctcgcgtttcaaataagcttctggggaatccatcgcatcgtgagcatggccatgttcaag  
aatcatcgcgttcagacaagttggacaaggcgtgaggaggaggaacaggatgaggatgctcgtggtcgtggtgtgaccgtggtgtgat  
ggcatgatgggatgatcgtgtccatggccatgatggcgtgatgatgtccatcatggaggactcatggaagcattctcatttcatttcctta  
cgaacaataggaacgacatttttaaaaaaaactcgtcgcaaaaaagaggaaatgaaattttattaggaaaaatatatagtcggaatc  
tctcggattggtattgactcaagaaccgatcgttaatattcaaaactacagtagcaagtataactattgatactcaaagggtgaaagaatgaa  
agaatagaaacgcaatttcaactcaaaagtaagaagaaaaaggaaaaagtaaagctatggtaagatatgtgaaggatagaatctga  
taacgcttgataatcgacatctcaatatcaagtcgatttcagggtcctggaggcaaaaggcaatcaaacccttatggttgtatTTTTTTT  
TTTTTtattaattatttctttttctttttggttttttcaaaccataatagtcgaatattcgcctgagcaacacttacagtgccagggaat  
agaatgaggacgaggagcttcgctttgaaagctaggttcgtttcaattgttcaatgaacgaaacgatcggttctttgtaatacgcacgaa  
cctttatatgttaatatgggaatcatatatggaatatgaatacaactgagtaaattatctaagtaaagtatgactgaaagttgatgttgaattg  
aatcttaactactaatagttattagttatgtctcctcgggtagattggaagatgtacaaacattttactcgttcggccactgaagatatagccagaa  
cagttaggctagtataattttctttttccacatctcaactttcacaatgttcaattgttttctgtcacatggattttctttctctgtctgtt  
aacaatgtttttggtttactttcgtctacaatctaactccgtagtattgggtattatataatagttgatgatactaaccttctccgataatg  
gatcctgtaaatcataagaacctttaaaaatgttttcatcgaagttccagtcatttttgagaatggacaagcgaatcatataagcttttat  
tgttttttggttatgtcttttttgaaggccacacgcttcgtttgatttgcgctgtggttgaacaagagtcgaataaaagctcaagttcaa  
ctactgaatggagttgtctttacgggattcaaattataagaactaggtcgttataaagtaatgtacaaatccattttactttttcttttcgca  
aactcgtcaccgaaagggtcctaaaaacgaaatcggcaagaagcacttggaatggtcataaacagttctttcaagaatctacaaggatatcc  
tatttttaagcttccgatgtaaggaaaacggcctttttttcattgttttctgatcgaacaattcaacccttgatcatgaaatcttatatc  
atatccatgacgtcaactggagtagcagacttaataacgtgtcaaatcgcattgttcaacagcattcacgacacgtaaacaaaagctgcgc  
tgaatattacgcttgtttaccaactttcattcatttgattttcttttatctgattccttaaacttggttcgaatcctatcatcatgagtcctgcact  
tacaagatctcagcaaaagataccgttcataccatcctgcaattcgtgagtcggaacgtagagaacagcatggatggggcgatttaacaagg  
aaccccttatggaagatcaagctgaacgtgatgtaagaatgacttgcgaagacaaaaagaagcaaggagcaggccagtcgtcctgccc  
ctaacaactaatttctttttatgaaacgaatggattcaatacagcagcaaaattgtattatccttgcttaaagagaatcttttgccctcatcg  
tcatgacttataatgtgtataatgattggttacgataatgttttctgtatataatgattgaatacaaacagaggtttctgtcccaccgtatctgtt  
tctgtcagattgggtgaatggataatggagcttatgaaacacaaaatcaacctggtttctattctaaactattgtgattgtatgaatgtcata  
tttcaaacgaacaactattgtctgttgaagatatgtttgtccaaaatattcagctatacagatcgcatacattagccatctctctattcaagtt  
gattgaaataaaaagacggaagggtgtgactctttcaattaaactattcgttcgggagactgatgttggttactaagtacaatttgcttattccatg  
cgagatgaaatgctacatcaattatggaatttacttcaaggagaggttaccttgtaaataatatctcataaataatcaactgaagagta  
gcaaatatcagcagagtttcccttgttccatgtatttttttttttaccagcattagcgaatttcttacggaagtatttctccaagcttc  
agcaattggattcggaaatcgtttgatcatgaagtgatgtgtcagactcatctccggcttctgctgttaagtcgtagctgtatgcttct  
gtttgtcgtttgtctatttattatgccactgatttgcctcatatcaggattaagctgtccgactaatgatcctcgagaacgagagcgataaccgtt  
tcaaaaatctctgacaacgtagacgcagagatccacgtcttgaactgacgtttctcaacggcgtgtggagaactggacagatctgaagt  
atctaactgattatcatcaaatgtgatgctttgtcctttgtatcattggcagggcgagtattcataatgcaaaatcataaataagggggtga  
acaattacactggtttaattttatctgcattataatgttaattgaagtttttcagatgatgatcattctgttctgactttcatacttaaattg  
tccaactaaattcaataactttatctaactgtgatgataataagaaaaagataataatgtaatagggtgatcgtagtgtgaggttcaatt  
tatctatatgtcaaaaaacatgccttcttgtgatacgtgcataatataatataatataatataatataatcgacataagtttcataagcttctacgtg  
tgttcttctcatatgtggacatgtctacgacatctgtggcctaaaatcttgattgacgaagtgtttcctcagttgcgtggccatcgttgccacat  
ccttgggtagggatattgtcttaattagtagtaacaaaaatcatagtataggagaattacaataagttaaaggagggaagcgtataattgtgtt  
tctcgaagacacaggttctttatcaagagaatgaacgtttcattcgtctttggcgggcttacagtaaaagattttgtgcgacgaaagtaagat  
gaaaaatctttagtattattagggaacttttaattccagcatgggcaatttcaatggtaattgactagaacgatctttcataaaacgtaggtt  
gtgaaagccaccaccgaagaaatcaccgttgacgaagcaaatagtcaggaagtaaggtagactatttagagatgtagatgaacattacagtg  
tggtgtttatgtgatgaacaatgaaggaaatgcaaaatcatctcaatattgaagagacaacgttactaagcagccgaatggaataact  
acaagataaattaaagtagactaaaggtaaaatgtgtgaaggtttacatctagaaaatgtactttatcgttgcctctttttgtataacaa  
tctattgtctatattgtttctaggtaaagtaaacattataactaattccaatttttttagctgctacaacgaccgtaggcattacttattttt  
cagttcaaaagtaacaaatggcgtactttttaaagtaacagcctgtaacatattcatgacttgagtatagtaattctttagggatcatatcattgt  
ttgtcaatttggttcatcttttcatatggcttttccgtgttttactgttctgtaagctccttcttctgtaaaaatcacaatcatgttgtaaaaa  
aataataataataaacaaggaaataccgcaacgcaagatccggctcaaatcttacctttattcacctaaagccacactattgttttaacgt  
cttaacagtcatttgcactccttcttctgtcgtcaaatgcactttcgtttgccattctcaacaagccctttgttaggaaacgattactgttttc

ttattgggaagtttctattcaactaactttaccatgtattcaaaaaaccaagctatgacttggcagcatatcccggcgaccctcgtcgtcgtcttcg  
taaaaatgttcgattgaaacgcctgctgaagatgatgagtatcgtgattttgaagacagtgatagtgatgccaaaaattgaaaaccgaccc  
taggaaacgcgttgatcccattcaacacatgctactcgtcccatctcaaccgtgtctccgatcttctaaaaacatttctgtaacccttatgt  
gcttcaatttctcttttctcttaacggttttatgctgtttcgtcccatgaaggatcccttttctaatctgacgaaatcaactccccttaatatg  
tcgaggtaaaaatgtccgaattgttttcttcttctcccagccatttcttcaatattcaaaaacgtccttttcttcttactgtatgccttccg  
tggcgttgttccgcttgtaataaagattcctactactgttgagtactgttttcaattgtccgatcgtttgttctctctagattaagccttgga  
tgccatcctacttcaacattcacaatactctacaataatctaaatcaatattcatctccttcaacttaatagtcaataataatgtattagctcagc  
gcgatttctattactacaattgcagaatcgtaaacctttcccttaagaactatatacccaagaaccaatccaacaaaagagagatgctga  
atthagaccaacctcttagaagaataatcccgaaggcttagagcagcacaccaaacagcctgaaaaaatcaacatattcacttata  
tgtttgatgccgctgattcgtacattcactcaatcatgctttctctgtaattttgtattttctccatgtcaatactctggatctc  
gacactttcaatcgttgacacagtcaggtgagccatagaacaacatgcatacaaaaactgtcggatcgttcacataacgcttccacatctgc  
aaccaacaaacgcacgctcaagcggatgtcaattcgattttattatcatttcatctgttactaacgaatcaatcaaatccttctgtgcaaaaacg  
ctcaatcacagtgaatattattatcactcccctattgctttctttttctctatccataaataagatattctatccaaagcatctttattc  
cttttaacaatacttctgacagaccaaagtttctgacataagtgaagaaatcagctgcattagatcaaaaggatcagcttctgtaatagctta  
ccacatgattgagagctaccactgttataggtgtttccatgatgactgggagcacgatcatagccactactgtaaggactgtagctgtgtggt  
gttagtggtacgacggaaatcacaggttccgtggttccaccgcccagctccacgaggagtaaagcgaccgctccaccaccactccaaag  
ctgttatcacgggcatagccaaaaggaaactaggacattcttggttgactctgtaaaagatcaatgaggtccttagcaaggccttattatta  
cggttgaagaaggaaacggcatgaccaatattccagcacgaccagtacgaccaatcgatggacatagtcataatcagtaggtaagtc  
agttaatgacgtgtgttacgttgggataccaaccacgactagcaacagcagtagcaacctgatggaagtacgacctgaacggaacaaatc  
taaagcacgctcacgttcacgttgagtagcgtcaccatgaatactgtagcagggaggtactgttcaacagatagtcagtaagagatcagccat  
gcgcttagctccacgaaaatcaaagtaagccttccaggggaagggtatgaaggatcaagcaagtaactgcgctttctgaaatctcgacat  
ggacaaccttctgagtaatatttccagaagtggatccaacacgaccaacactcaaaaagatgtagtcttcaaaaagtcacgagccaacaattgg  
atatcggggggaaagtggctgaaaacatgagagctgacggttctcaacatcagtcataatcagcaccttgcacaattgtcggattgaggttca  
aaaccatatacaacatcggtcagcttcatccaataccaagaatttaattagctaaagagatgcgaccggtcaattaaatcgaccaaacg  
gccaggagtgagcagagcaagtcacagccctggctcattgacggattgaccgagatcagcaccacataaacggcacaggggcaaac  
ccaagagcggtagcaaaaacttctgattctctgtaattggcagactaattcacgggtaggagcaagaattaatgtggtaggataagccttacg  
aggacgatagccataaccggggttctgctccatgggaataggagctggcttctgtcaaacgcttgagaaagaatggggaacaagaaccagcc  
gtcttaccggaaccagtttgacacatgcatcaatcgacgggaggtgacgatgggaatagaattctctgaacaggggtagggtgtgtata  
tccagatagaaaaatatttgaagcaactgattgttcaaaaggaggagaaaggaattcatgaacaggttcaactcacctccagacacctcaacg  
gggatgtcatcacttttcaaagtgattctgtgaagctttaatgccatcgcgacagcaccacaaataatggcgttccaataaggtatttctggc  
accgatgatattgtaccgtcttccattggccagctccacggttattcggtatccaccgcataacctcagagagccgggggtctctctgg  
cgaccgtcgcacttgcaaaaccgcttgacgaccttccaccacgaggaaaaaactcacggcgtccgcttagccagaagaggagacctcg  
ctaggagttcagatcgagaagatgcaggctcagagctcagaggagtagctggggcagcatcaggatgatcaggggcaaaaggaggaatata  
ttcctaggctgtgttgagatttactcttcaaatctcagttacggaaccaactgaatctacttctgtgtacattgtcgtcataatattttat  
gttcgtgtgtgtgtgtaaggtaggttcaatctcggttgactccccaaatacagggcgggactgtcctttatagacagcagatcatctttg  
gccacgaaataaattgtgctgaaataaaaatttccgttaactcgaatgtcgtttatgtatagttccgttgggttaaaaaaattttatgga  
gtttgaagagttcttcttccatactgaattcttcttataatccagctagctaccagaaaagaattttacttgtttgtagaaaagattaatga  
aaagatgtgaattatgttttaacaccttttgtaattagctcatctagctcagtaagttgatgcattaggtactaatccttaaccaaagcaag  
cgtataaatactagagaattagaatagttgtttaccatcttgaattgtgactgtttcttgatattttttgagaactcgtcatttagcttaa  
agcttaacattggcgtagggtacgtttgtcctccagccttttctcaaacatccaattcttctgaatacagacattttgagatcttaccata  
aacgtcagctcagctttctattattttataaataacttttggcgattgtcaatagagaagtaggtgctattgaagtcttcatccttacaacgtcga  
gtacataaaaggcaaccaacaattcagaatttttcattgctgcagaaaatgctaattttaaactgcttactacttggcgctattttgggatt  
gttgattaacccttagcattgcttctgttattatgtatcgaggtcatagaagagcacaagccttgtaaacgcttttgacacggttggtt  
tactttatcatgggtacattagctcactcacttggctgacggcttcccttttggcttctgcttctccatcttcagtaactacgtctacaagctta  
tttgatacattcccattcttcttccgctcgtctacggttttattggctgtgcttgattattcaatcacctctgtgggttcgattcttcaaacac  
acgagtttccgggtcgtccacggggcgtcacttacgacttcttggcaagagtggtcaacataaccgtccaccttttctcaggtagcctcgtttatg  
ggaatttgcgttggcgttctattggaatcttctgtcgttaccgctgctgataatgcttggccaccacatagctaccgattcttctgagacct  
cttctatcctgttctcaagcatcaagtcctgcatcaatgtctgctcaaatgtacaagaaaattggtgctacattgaacggctctt

gtcgccttagttaaagtacccatagggcgcaaatgaacgtttcgtttgagcaaatatctctttcttatgaatgtacttgaattatctatcccttt  
atctctttttattacattctttatcagctcttactgagtcattgtatctatccgtgcattcctttctctttcttgacgttatgcaaaaataaaaata  
atctttcttagttgtaactactagattcatctgtaataaacgattttcccctttatactcatttaaagtgagaaacacgatgattaccactct  
tcattactgctttctacatatcttgatttttaagttgcaataatagttattgataagatggtaggaacacataaaaacatccaagaaactttg  
ttgttcggagagaaactatgatgctctatcatagtcgctctcatggaagataattgtaagcaggtaaacctgtagcttctaccgacacattatgtc  
gaaaaagttctccataggttatcgaattaactttctggaagctggagagaaatgggttgtttctaccaattctgatagtttggacttgggggacc  
tggctgcacatacttctccaggaacagattcactcaagattgagtgagttgtctcatattatgataggcctgagcaatggatatagtttttg  
ccttttggggaatacagtatatgcatttcgaaaaaagccaatcctaacacagcctgcgatgatgatgtcggccggatacctaaaacacatatat  
catcaatagttccaacaatcagcattgaagtttaataaaaaattgtcgaattacaacaaatgaaggttgataaccactgttgcgtcgtgatgctgc  
acaggaaactgcaaggtagtcatacgaacaaaacctcccataagatcagttaaagcatacgaatgtcataaggtagataaaataaatgttct  
cgattttggagaagcgcatctaccactagcgaaggttgaagcaaacgttgaattcagctactgcaaggagtagagagtagttgaataatgac  
gggttcgtgtcgtccggtgtgtaacaaagctccgctatactttgttccgtctacaccacctaataaagtgtcccgtttccggttgtatcaaatgtta  
aactgaaggacggcgtacttaaaatcactgtctactaactgatccaaaaacgtaggtggttgaatctcgaaatagaatccacgaagctcata  
ctattaattcagaagaagcagccaacccagaacacctttgtatggtaataaagaactgggaacgtactcctcaatgtaatccaaaactgaaa  
gttactaagttcatggtaattggtgtactaactaagagcttgaacgttaactccagcaacctgatgttatcatatattgattaatacgtcttgg  
gttattcacaaggaaaaacccaatgaagaattaccggtatagcaagagtcacttggattggcgtcgaagggaagtagcgaagttcctcact  
acccattgggaacctcaacatcgattcctaaaaaagttggattgaatgataacacatcgtatgtgagccaagtgtatggcatgtcaaggt  
cgacagccacaatatatggaattgcaggatgacctatatacagcgtagttggtgaatacgcataactttgaagagtagcaatggaagaagtaggacat  
atcagaacaaaaactgaatagcgtttttgtaagtgaggatttgcggacgaaaattccacactcctcggaacaacatccaaggcaacaatacct  
cgtccacatcgtgataggcaattacggattttatccataaaaacaacagagggacggtaatgcattgaatccaatacatatttaaaacgaatgaa  
gagatgaaaagaaagagttagacaaactaagatccaccaagaatagaagatagaaatttatagtaatgtattacacaaagacgctgaact  
gacaagaaaaggaaggaatgaaagacaaaatccaagaataagttgcaagcaaaagcataaatcggaacaacaacaatatcaagggga  
agaagagtaaaataaattgaatgctcctgtagtgcaaatgcgaatgaaatggactagatatttcttactgtagagaggggtgaattg  
accttaataacctaanaagccaagaagttaagcgtagaataaaaacaaaagtaaggctttcaagtaataataacagaagaggtcgtcaat  
aaaccggttgatgatgcacaaataatggacaacacagtaaaacgaacaaaagacgaaaaaatgcaataaataaataaattatgggaaa  
tcaataattaagtaatttcaaaagccctgtagctttgttagacaaaatgcttctattagaagctccccgaaataaataggatgcaagg  
acaataattcagaatgagtgagataaaacgctgaagacaagcgtaatctccaagttgggattgcgtttgaagttcgtattattgatgctgttca  
gtttacgctttcaagccaactatagcgcagaaaaacctccaattcaatatataattattaagcattcaagaaatatttttaggctcataaatt  
agcagggcttctcacattcaactgaattggtgaaaggttaaatcgttgagaacctaagttgaccaccaccaggataaagaaaacattctt  
ccaatattgtgaaggagctaaaatcgtttgctgtcaaatccttgaactgttacaactatttattgagcatcgagtgatctttgctttgat  
cttgatgaaaatttttcataggatgatatggaaggggtaagttgctattgaggattttttagcattttattcagaaataaataataactaac  
atatattagaagtctgtcagcttgacgcttcattaacggaacaccgcaagatttcagttcaaggcagagtagtcccaatggagagagaatgca  
atccatagattctttatthaagagtgaaagagatacctgaaaatgaaaatagatcagacagtgccgtgcttgcttgaccggaaatataaaaaac  
tttactactcttgggttaataactaaatccggatgggttaggacagatttcaactgatcatgaaatacaactgattatcttaagaatggcat  
gagttctttgaaagaaatctttactcaggtatgttgatacatggcattagaatcattcttaaaataatcatttaataagctgggttcttgcacga  
gtgactttattaatatttttagtaaatcaagcttgattcatcattctcattcagttcaacctatacatcggaacaggttttacctccagcttc  
ccctactgctccttctgaatcggtaacggagccactgttaatgaaggatcacaagaatacgaagacgaagaagttgacgtagcagaaaagccc  
gaaattgatctacctagttatatttctgaaaaggagactatccaaccaacttgctgagaaagatgcaatacaacacaggaaggaggtgtag  
atcaagaaacacaagaaaactaagggaaacaggaactattgtggaggaagaaaatgcaaataggccttcaacttccaacgaaaagacctc  
agacgccgtagcgaatatgctgccctgcaacttaccaaagagcagaaaagcaatgagcggccgaatttagtttctaatgctgatgttggtta  
gaaactatccaaatacaactgaaactcagtgactgacaaagtaggagatacagagaccatagaacaaacagtcggttgcaagttctccactg  
agcctagccatgagatatctcaagatacaactgaagcttctcgtgaagaggagaggttggagaagtaacaaagcaagttattgaaagaaacag  
atccaagttctattatcgcgaacaacgaaaagcctgaagctgaagcagttgatcagcagtagacaacaagtagattctttgattccttcaaatgatg  
aagcagaacaagaaatcgcgccaattcactatctactacggagaaaccatttggccaagaagcaccaaaagtgagtctcagaagaagt  
ctgaaggtgttaaatgttgctgaagcttctcctgaaaccttattcaattatcaatctcttcttcttcttctcctcagaaact  
tctgttcagaggaaaccggaagatacttagatgcttggctacttcgcacagaaatgatacccttcatgatgatcttgagaacgcttacaagat  
gtttctactaataactggatgcacgcttatagagagaaaatagttagggagctatccgagtggttcaatgcaagaaaaaggaaacttggtc  
gtttccagcggaaacgacaaaaagaaatgggttcaacgaaaacgcatcatgattatatacttgatgaaatgcagttggatgtctattgactttc

tcaggaaagcgttgaaaattgtattggcaaaacaaatggttgattcagtcagtgactatcatacaacatctgataaaagtaccgtatgtacc  
cgtcttcttatctaaaaacaaaagccatactatataatggaagcagaagaacagtatgtcttcagatcaaattacccttctcctgattccgc  
gagtatgatgcaggatcagtataatgctttacagtcgtcgtctccccttcgagatacagactttttagcactatcttccggacgatgcatgtctac  
taccaatgttgaagaatctcgcaactctatgttgaatgttccaacctacaatccacctaacgctactgaaaatcagttgcgcacctcagcaattaca  
tatcccatagaaccaatctcagattcgcttttagctaaaacgagactaaatctagttgtatacacactgagcggaaaagattattcagtgaaacgc  
gatactgttctcaccgatctggagatcaaagcaagaacgatgaggcttttgaagatctgacctcaattctgaatttcgaggggaaacacaaa  
taaaaaacgagcattcgcaaccattcactgtgcgccctcctatctcctttggcaacagaaaacacttccgaggttatttggttgccagaagagga  
tgaactgctcttttactactaagacagtatcttcaattgggaatttatagcagtcgactaacctcgtctgggttatacgtgtctaaaacagaaa  
gaagaactgcttgggattgctttgagaggtggattcgaattgatcctcaagctcgaatgttcaattacaggatctcacgcaagatttagcacaac  
aaaaattagaggaatcactgcagagatcacatcaatcaatgcaaaatatacatatgctgactctactactcctgtacctcaccttaaatcaaa  
gttcttactttgtattaccgacctatctcgtcaatccgccctatagctatattgaagctatcaaaaaataacttaagcaacgagaatttgctcaa  
aaaaccgctactaaacggcagaatgctaattgtctctacttctcctgagcgtttacctccggtaccttctccgattgaacttccagattaaattcga  
gctgaagcacagattcagcaagttcaatctcaagaaatgcaaacctatataatgcaacatcaaaatcagaccaagatgaggccaggagcccc  
tatatctggaacacctcagcacaatggcagcatatcaagcagcagtttctcagaattctagtgctacatcctcaacaggcacttctccagtcct  
tcaagagctgttctcctgattgccaatcggttggattatccaaattcctcaaggttggcagcggagcagattcagccgttcaacaaagatagacc  
tttatatgactttgctatgataaactgtatattactttaacaaaatgtaattggtaatttttgaatgaattgaatgattcaagttctttgctctga  
aagagcaattgataggttttctcgtggttagtgcatagtaattttatgaaaaatcattatgtaaagaaaataaaagtatacgttgggac  
aatgtaaagagatgggagatattcagattaagctattcacgtacagtcagtcattctggataatcaatttctcaacgaatattgttattttct  
gaagaattgaaacagcagttgggagcacacgattccatcctaattgtcctatcgaactagtagtaacttcttcttgaaggcggtttagtttctt  
gaggttttggcattggttctgtgtttgtccattactggcaatctatattcggtatattagatgaatagcttctaggaagacaaaaacttacca  
gcagcatgtcgaacactcgataagaacggatattatagatcgagaaatattggcgtctctttgctcgttcaagctccttcaatggtcatattgg  
atagcaattgtgagagaccagtttgtgactgtcactgaggtctttactttcaatgtatcatgaaacgaaagcttggcacatatattctcagcaac  
agctcttcaatccatagaaacctaacagagcatacttaccggccgctcatcttaataggcacacccaaaataaaacctagcggactattt  
caaaaatcagaaatacacacaatcggggacttttctgaatataatgagttaaagaaaacgaaatccttttaggataaccaggtttttagaattgaaa  
gctgaaaatgagaggtattactagaaatcgtgaattctgggaatacggagaggcaacgattgaaacacgaaacctgaggaaatggacgtctt  
aatagaaggggaccctgttagaggttactttataaattatcaataatataaagggaaaaaatctcaatataatgaagtgaatcgctttctctt  
ccggaaggaaaaactgtacagacatttgtgtttcgcctccttgaaaaagctagcaacaactcaaatcttttaggtaagcatagaatgccat  
tttggttacctttgatgaaattgataacgactattcttgacaaaatagacatggtcgtcgtctgttttctcctcaggttaggtcccctgatttacgaaa  
cattatagagtatttctcgcctaatttaattgaattgggtttgatgggttttaacttgggaaagacttgcgcaggttctgaaaagctaaaccataca  
tacgttctgactcctaaaggcttctgtcttctcgttgaacagaatgaaactcaagaaaactatctaaagcgttaagcacaagctcatggt  
tttccagttacatattttgttgcctgaaacgactgcgaatgctgtactccactttatgctaaaccataacttaaaatattatgaaagaaat  
atatcatgaaagatgatttagtcttagggtctcagataaggagatgaattttccacacctgattcatatgattgagccttacaattaaaag  
aaggcaatacggaggaaacgacacataggacgaagtacctctttgtgaaaagatattcatatgcttccgtaaaagcttctgaaaagaacggtt  
gagcaagacagaatccacattcgaatttgggcccgaattgacaaaaaattatgactgaacaaatccatgtgcttagtaatacaacaact  
agcataagaagtttctagaattccagcaattcctatacttcaagtagcagtcggtataatttctcgtgataactgtaacttgatggcttgaattga  
ctttaaatacaacagattcattaaggatgtgattttttttttaaactggatgaaatagctaaactcatacatgcagttcccgaagctgttaaat  
tccagtcagagtaaatgggctttagttgacacaatggataattgagcaatctacaagcctcgtatgaaccatttgatcaattcaatactggagt  
attataagagatttcttcaactcaaatctaaagtggctacgtgtttacaataacgtttaacaattttcgttgaaccgacaaaataaaaa  
aaattagagtctctgtattcatttgcataaattataggcaattaccttataaataactactaattgaaaagcatttaggttctcagaggaaattaa  
gggagctaaaattaacatttctactgcaagtataagattgttctcaacaagcatgggttaaagaaaattcgtctcaataatgcatcaatcttcaa  
atgagcagtaattctgtctgtgcccggtagaattgaagggaacgttcatgacatagaattctaagaaatgatggtaatcctccttgccttatca  
gtctttagaacaggttcttaactcagagctttcacgcttctcaagtctggctcaggttctgaaaactcaccagttcttagacacgaag  
gaagtctcataagcttggcaggaaattcaggaactcagcttctcaagctcgtggtcaggttttggaaagctccaccagttcttataaaca  
cgttaggaagtctcataagcttggcaggcaattgatcgttagagggtaccacagaattggcatcagagccccagcaggagtaggtatcggag  
cagcagaggctaaagcaaaaagaagcaacaagagaaaagaattctatcggaaaagaaaaatgaaagaatattactcaagaaaaaaa  
agtcaagcaaaaagaagagtttcagaagaaaagaattaaatacaaaaaatagaatgctgtaagagcgtttacaaggtccaaaagttca  
actcgtcgaaggattaatgcaaaaaagagatttgcataataaacaagttataagagaagagaaaactgaaatgttctggttaattaga  
aataaagcgggacctatataatcatcatgaaatccatgagtttcttctgggatgattatggacttccaatttcttgtttacatgaaatcctcat

ttcgtgttttatgggataaacctaatagacaacacgattgggtggatgaaagcacgtttcttgaagcgaggcacgatttcgcggggttatgtactt  
attagccattgaaattgtttacatcaaggatgatataagagcaaccaatatttaatgtaattggttcgtttcagtagagataaaaaagaacaat  
agaaccatctctattgaaatcagcaacttaagatggtcacataagccaatcataaagcagtcgccccgaccaccaaatagtcggttaaggaat  
atgaaaacagaaacaaagaattcatagaaaaagaggagtgtgacttttctgaagaggaatccagctgttaacaagatttattctccattcatc  
cgctcattctcatatcgttgtttatgatctttcaaatcatagtagtgaatcttttacagggaaaggaatctttgtgatgatcagcggatcatc  
ccaaccatataaattccgcttccgttccctatcaaaaataacaagtaaaacaaactaatggataggctgttttactgtaccgtcattgt  
ttccatccatattaatagcgtcactcagaaaccagattagctgtctattaacatagcaaaggatcagattgaaatgggtcataaaagacaaa  
aatagaatcccttctgttaagcatattaattacttagaaactgtacattttgtagtgattttcgtatgaatgctttctttctgattcattctccat  
agggtatttctgtgaaacaacatctgtcatattgcatttttaccttccacgaagccctctttctacaattgatgaccgacttctcggaaatccg  
aggaggtacccggcgtcccgaagacaatggtctgctggagcagcttccatataccagagtgaacagcttacaacagcatacatccaacg  
gcaagtattagacgagagttggccttgggttttggcttccctaggtctgtacataattctattctgttacttttctggcatcttttctctatctt  
atcttctgtaagaacgtaagttgtccattaacgcgcattgagagcggcatctattcgagatttactatgtagctacatgtagaaagcgtgctg  
tttgaatattccgtcacgtttaactgttacgcgtttttttatacctaagagtgtgataacatgatttcaaagttgacaacatctggagtt  
cgcgcattccgtcggttcacgtgacttatctatcttattgccaagctcattatgctgtgtctgtatgtaactgctacttcagaaacccttatagc  
gcatcatcatgataaagtaattttgtttgggtggtctggagctggaagggaaaccaatgtgaccgtttgacgacagagcttggctgtgctca  
catctctgctggtgattgccttcgaggaacaagccgtctgatagtaagtgaggcaaaactcattaagaatacattacagagggtaaaatcgt  
acctatggaaatcaccttgcgtcttttggagctaaaatgaagtcttatagccttcagggtcacaataccttttgattgacggtttcccacgtaaaa  
tggaccaattcgaaggattcgaacgcgcaatttgcctgctactgtagctctttcttactgtgatcaggaaattatgtggggcgttaatggat  
cgcggcaagaccagtggtcgagatgatataatgccaatccatcaagaagcgtttcgttacttttaccgagacttccatgctgttgcattgct  
tgaaaaacgacaatcgttctactatcaacgctgagcatgaccctgatactgtcttgaactacgggtcaatgctttgcaacctacctttagct  
gcttaaaactgttcaattatagaccgtccttcaaaaacttattttgactgttattcatccgaaataggctcttaactgataagtagatatggtatg  
acctgtgtataagatttaagacttactcatcgcttacttccatatacaaatcacaactagctctaccaaatcgaacttacacaagaa  
aatattattaccaaaatatacgtgcatctttttttttgacaccaacaacaatattgtgtaagtccaataatgaaacattatagtaattttgt  
atgcttcagtcagaaacttgcaatgaaaataagaatcaagtgagcaacgaatcgtgacattacatcttttctaccctttctatgttctcattaaa  
ctatacctatgatcacgggcgagctactcttattcgaccacagaaatgaatcataccagacatacagacaagattagtcggaatcagattgc  
ctgacttctgtaggtgccacattgactaaaagacatcttctcgggtgctgttcaggatctcacagaacatgctatgaaatcgaatttctggt  
acaccggcaggacttctgctcctcctcctcacgagcatgcaacgaagaagtctcctcgaccttaccctcaatgcgctaaaacacttgaaac  
agtgcgtttgaattgaggaagtgccggcgttttccgtacgcccggcatggttctttctgaggttccatctttgatctttctcaactaaatggaga  
aataaaatccagctgcttactgacagaagcctcaaatcttattttaccaatattttgataactcatcgatcgatcattgcatccacat  
tttttcagcttaacttttgcattctcattctttcacacaacttctcaattggtaatgtaagtttaactctgtcacctatacttataatatt  
atgtgactgcctgtagacttgggagctggtactctcaagtaccttccaactacgcatacataagcaaatggtaagttggataaatttagcga  
ctttactacatttagagttcaattggtacaggttacgattgggactttctttcccgatggagctgtttcaggccgaatacgcgtataaag  
cagtgagaaatggaaggtaagtgattttgaggttagaaagtattcgtctaatcattacagtaactgattggaataaatgcaagacgggtg  
attcttgcgttggagaaaatcgttattagtaagctgttaaacctcgtccaatcctcgtataggatctgtcggctgcatattggtattgcaactac  
gggattcattctgatgaaagcatatgtaaacgtgccagagatgaagtaattctggcgtgataactacggatctgccgttctggtcgggt  
atggctgatgacttggcaactacgttcaacttttacttctattcaagtgtacgtccttttgggtttatgtcttttggctgcatatgatgacctg  
gacccacttgcacatgattgaacctaacggcgtgtattggggatacaacggcatttccagcaggcaaggtcgacaaatcgtcgtatgaactg  
gagaagttagacttttctacattgaaaatgaaagatgctgtaaaagaagcagcaaggatgtatgattaagtccgtgattggttatccttaggtg  
attacagctagtaaccattttttagtatatacgtaccacagcaagagcataacaagagcacgaaatgaaatgacctgggttgggtgaa  
gaaaccaatggcatccatacggctgtccccgacgatctattacaagaggcagaagcttatgctcggctaccgttgaaggcgggtgaagatgagg  
atgtccccatgaatgagtaatttataattacaaaattctcgtgaatcgagctgtttcttactttttatacataatatactttgaggctcctggc  
tttaaggattgacagttgaaatccctcaaatctatcactatctttgtcaaaaagcaaccaagaacgtccttattttggcaaccttattgctttct  
ttataaccgatttcaacatgatacgaaaaattgttgaacaataatcctcactataaagagcttccagcttgattaacgggtatagcgttttcc  
tatccgtcgttttcttattccacagttgatgccgataacaccgttcattagcttgaataactcggatgattcatgattctttatacagcgtcctta  
ttttgattcacaataaggcaacaaaagctccttggcttattgggactttctatagactattctattcttttctatggctcgtaaaatattatg  
aaattattatagctataaatgattatgaaacaaagtcagataatataagttacttaaatcgaacttctatacatacaaaagacattcagta  
tattgtatttttattcatttctaaaagtttctaaatttacttaattaattaattaatgtagcaacagttattgaggtgaattccactagttcga  
aaaacatctaccaaccgttcaagttgatctccagatatacatttaacaggtaatctctgatcatccaatattgtaacagccctgcttctgtaact



gttaaataagcgtgttcattatagaaaaagtatgtgatttaatagccttatataactacttttttagcagtcacgggtttaccaacaagcgttgaa  
actgttgggcttcttaaacggtaaacaaaaaggtattgcccgaatagcctcctcaagagcataaagaacataagaaaagcaaggctttct  
gtcgttggctgcgtagttattgaaaatggaataatcttttttttttggtttcttagatcacttcttggtgaaacaaaagactttcccttca  
gacaagttgtatctttacatgattatttagcccaaaaaaagtctgctatttagaaaaatcttctttacaagattcatgaaatatcaagtatacgt  
ataaatagtattttgattttaaccgctcaagtatatatacaaaatgctgaaagaattattaactaggtattatgaaagcatatgtacaatgctataga  
cagagaccattcctgtaattttctacagtctgttttcataaattagaagggaacagctctagttagttgagtaaattaaatgaagcgttttgag  
agagcctgtaaaaaagaatgtgaaccgaaatcgaatagagtagaattgagtggaagaagaacaaacaaagtttgaaaaactataacaaaa  
aaaaataaaaaataaataattatcactgttgagtcctttttgagcttttgccttaattcttggttacgttgactcggcggtcaccggaagcag  
cctcctgtgtagttaaaggaatatagttcccttgatcaaccggttttctcgggctttgtatataagaacgtggcggaatgacgaacgctactcc  
aacaacaaaggcaaatgagatcttaaaatccaacaagtaaacactcaccaaagaagacaaaatgatactgatactagtggaagttcttcat  
aatgttatcagcaaaagcaacacagagtgaacaatgatgccaccgaacgctgaaggaggatagcgaaccaaacgacaggattgtaaccgta  
aaagaaccttttgagcaatgttgagtagtcgtaacgaggatgggtaataatacaaggcacaatagaaagaaggaaagttgaacgttacg  
gaccacagagagggattcgtacccttcaaacctttcaaaataaacgccagctagaccactaattaagcaagcagaaagaacagctgtaaat  
ccagtcaatggattcatgtacgtagaggcgggtgatgtactatcagaagccaagtttgcagctgcacgatagcgataccaccagtcagatgaa  
gagagacaccctttgtaaggcggagcttgcgatggagcaacacgacagagaaaatagcggtagtaaggatttttaactgataagtcacctgg  
aaaatggcaaccgataggttaccagctgcaacatactgcaagttgtttgacatgtatagaggaaagcaggaattccaagttccaactgtctcc  
accaaagatttgaggtaaaaaggctcttaagcgagcttcaactgccacatttctcgggaattggtagtagccaactataaaacatacaatcagctt  
gatcaactcatttaacaaaacggcggtgatgtaaaatcgtcttatcttataaccaggcataaacgcgaataatttaaggctattatgtaaa  
gttaatatctacattcccgaacaaaatcaatacaaaagatagaaaaccaatgatgcccaacagcattcatccgccagcatcttcaaccattcaaa  
tgataccaaaataagagcgtgtttgaaatcgtaacaatgccagcgtatataacttcataggaatgcctttaaatttcaactcatcccctttataa  
gccatgttcgaaagtctcagaaattggtagcaagaagatacgttgaatacgaatgtaagattccaaaactgcttaaatatccagtagaag  
aagcaagtcaacttaacaatgaaacaaggaatgaaggaatgaagggaacaaaggactcgaatcctgtacagttgggtgagccaactga  
atctaccaccaatcccctaaagcttactttaagtcagctcaacaaggcactacattgctgtacgctcgaatcagcatcgtggtataataccg  
taaatggttgtttcccaaaaaatctatgagcaagaaaaatccaatacaagataaaggttttattagagtaagagaagctttatataat  
atattctattattacattttgaaaagggtgacttttagtttagatggtagaaactcatgaaacaaggtttaaatgagggtattatcagtttctgttg  
gcttttcatgagttggcaacgacctaacgaaaacctgtagttgttggggagcttggtagctcattcgacaatttcaaaccttgaactctcagg  
ctcctggtagttttgtattccaagtcgcttaagacatgggtgaagtaatgtccatctccataactgatgaaaaacggccataatatcaattgcat  
ttcatgagattatggctacctcagttcaatccataaggttgaatttattactctttaggcttgcagacacgaaaagcttgcacgacctggatag  
cagcaggttggcagcagttggtacggatcaattcataatgttgaagagtggttagagcatacaacttttgttaccatcaagtacgcagactttg  
tgaacatgcttttagctttaaatacagcgttgcagcttgcgaattactgcagctaaacaagggttctgcttctgtaaaaaactcctgtgtcat  
cagcgtggattaatagctttcacagccttatgcctagacggtttggcttctttacatgtatataatgattggctcaataaaactcaaatagctgc  
ctaaactgaaccatcatacagagacattggtaaatccaacgtgaatcagctggaacgtgatcttctatcatgaaatgaaactatgatacttt  
ttcgttttttaacttcttctgttttaattagtgatgacggaggacgtaaacataaaagaacctatctcgaatatcggttgcattgattttttta  
atttcttttaattttcttctgttctttctatgtatgcttcttatgttccaacacaaaaatctatcataaaaagcatgttccctccacgtaaaactt  
tgctataagacgtagtgattgtcctattctttgagtgtaaatctcgtacaaaacttacttcttaatacgttcagtaaaactttaggcttga  
tattaaagtagcgtctaattttctgatatttatcaatccaaagaaatgttctgtctaggaatgggtcacctcccaaatcttgacattact  
gagatgattgagaggttaaagatagctaaaactagattagaagctatgaattcatttcaatactactgatcgcagagaacgtcttcttctgtg  
gagacgagcgcgatcaatctatggcccacacaatgctattgtaaccacaaaatccgttcttgcctcaagttacattaattcctattagttgtc  
cccatcggcttctaagtggtggtttcagtgcaatgcaaagatgtcttcttgaatagctagcaattgtccctctcttccctccttagctttg  
ctaccgaacaattggcgtttgtcagtggtcctactcttggcggatttgaatgctaggttaagttgattttttacgaaaggttcattaccagaat  
gctctttgaaattctatataacttttctgctaaacttcttcaagtttggtaatgcaatcagctcattgtcgggttttggcttaagacgcggtgaa  
accgtagctacaagcttctgttggctccattttgtccaactgtcgtggtattggatgtgccttattactgcaggaattcgacaccaaatt  
gctagattcaacgttactgttgcagacaatgattgcaatgcttgcctgtctactccagcataataatctctgctacctttcacttttagcttccc  
ataataagactagtgaaactgcttactcaaatctcgcggtacagctatcattgtcctaattgtttatgttttattatggttttccaattaaaac  
tcataagcatgtcgcagagatgtaaatgaaatcagaagaagacgaagatcatgaaccgttcttggattatgcttctatgttggctagctttag  
ttactgtttttgatctttatgtgctgattatctgttggttccatcgtatgccttggggaagaatcaacatctccaagactttcgtcgggttgattat  
ctcctgtagttgctaaccgctgaacatgtcactgcagttgtgtatcttaccgtggcaaatggattggcttggcgttgctatcggttctagt  
atccaaattctatgtttttggctccttcttggctcattgtcgggttggtcatttctcagccattaacgctgtactttgagctctagaacagtgattct

cttcgttctgtattattagtggaactacttaatacaagacggagcctctcattggcttgaagggtccagctccttgcctttacgccattgtgttttg  
gcattctttactaccgactcaataagctgatgggtgctgagactttctacatttctacgctttttattattttcttaataaagtttgacattcc  
ggtctttggagtcgtcaaccttcttcatgacttagagatcaatgtgtgtttggcttcaatgaaatccagcttcaattgtttctgcaactgttta  
ttcttagatgatagccgagattatataaaaacagggcaaaggtttatacaccacttttggccgtttcaactgaaagaatagattagaatcatt  
catgctatcgaccaatccaacagaaacttttaactctttatattttgttatgtacaataacattacacaatcacataggaaagtgaatattgag  
agttgttaaaaggttccatctttatacattacacatacaaatccattgagacttctgctgttttaaccaagaaacaataaattatagaatcca  
aactggccatatttactgctctcagatatgaatccaaacctcttttcttttaccctcctcccccaataagctcatcttataggggcacaatcca  
aacaagaccaaaaaataaaaagaataataggtattacagcctaagtattattcattcttctactaataatcgggtttcttacattctc  
taatcataattgagaaactgtctattatgataatcaattgctttcttcttttcaaaccatcgattaatttataaagactggtcaaaaatca  
agcattctacacaatggattcaacatcgaacaaaaccaagcatctatcgatataatcgagcactcgaagagaatacgaaccgagaagaca  
aggtcattccgctcagcaatcagcaagcttctctaaagatcatgagcaaaaatacagcaaccaactacagaggaaagagcgaactttgag  
aaaaactccaagtgctcagcgaagaggaggatcctttacaaattggattgactacattcaatggactttgaactcttatcccaaggcaatacc  
actgaaagcgggttcttctttgttagagcgtgttcaacattttataaaagtgctgtttacaaaacgataacgctatcttctgattttgag  
caatatgcaaagtagctgatgatctgctgaactgttctttttgtctctcatgaaataggcacgaaactttcactttattatgaggaatttga  
agttactatgaatcaaaaggatcatacaaaaaagccgaagaatctatcaaaaagggtttctcgaagctaaactttcgtcgtttcaaga  
acgctatcatcaattgtccatcgtagatcatatgctcctgacactatttctacgagcccaactaacgaatactctcctacaaaactactacc  
aagcgtctagtcttcaacaaaaagccggagcaatgaagattctattccagaagcagaaagtttctgtttttcagacgctgaggctattgaat  
ctcagaacggtaaattcagcaatccctcctcctgggaagcttttgaactgtggaacaaaaagaaaagaatacaattccttctcgtgcttgg  
gtcggtgaaatttacacacgcagctcctcccgaagctgcatccattagataattttctgtctatcaagatgaaacttcatcccattaatgtgtctc  
aatttttaagactctgaaaattattttttattccctatgctttatactttgaaaaattatggtaagtatcaaaattcaattttgcaaaaggaat  
ccagcgggttatcccatgtcaaaagtaacttccattatataaccatttataaacagatctataaaaaatataaataattttacacagtcataa  
aacagaggctaaccgaagagtcttttagtaaaaacatggaggcagcttagaaagcagattcattatagccaatccctcattatctcagtaac  
acctccacaagaacaaaattacacctagtaaatccaactcacgtaagtgagcaaacagttttcgttatttcggaaccttctgtcctaaatca  
agaaaaatcaagttgctgaattcctgaaaagattccttttccactttctgctacacaaaactccaattttggcttcatcttatcatagtttgtg  
ttagctgttcatataaacaatccatcgttcatgttctttgtagtccaagaacagcataacttttgcagtgggggaatagtgctgatattcaca  
ggagttgaggaatataattttttccatatttattgctgtaggtttgtagactgagtgtttaccagattcctccacaagcacgaatttgttcaaga  
ctaacaccgctggtcgtagaataacagggcattacaagaccatttactactgtactttcaagtccgacaccgcaagatccgcatccaagat  
taggggtatcttccctgcagatcattatatacatgttttagctgggtggcgaaaggtcagtagaagcgtttccgacggagcggcacaaggaa  
catcagcaagagctattaaggcaagagcaacaggatgttcaggcatcctaaccgcaaaagtaggttgatttctgtgaccactggtgacactggt  
ggatgctcattatttttacaggtagaagaatagaagaggtcccggcacaatcgcattatcaatggatcgtaaacttgcggaatcaaaagagtc  
atctgaaaaaccctgttttgtattcagaggctgattttcgaataagctctcgaagctgatctaaagaagcaatgtgcacgatcaaaagggt  
atcagctggacgatttttagcctgtaaatagagtaaacagattctgttcttctcgcacagcaccacaacgtaaacggtttcggtagggaaagct  
acaggctcattttagaattttagaagttcggcagcttctgttaaagcgtcaaaagtaggttcaattgaaagccttgaatattgaaagggt  
gctctttaggatcctcctggctgtcaaattttataaagatgaatccaccgttcaattttggctgacatttctacgatagaaaaggctaataa  
aagccaagcgttcaaaaaaccaatgtgtgcaatttgaagtaagaataaagaatcactaacagctaaaaatgggaagccaatagaaaaa  
aaaatttaaattgacctttcaaatatccataaaactcaataaaaaccaaccaatgaaagattgattttctgagacttgataatcttaagaa  
acaaatagtttcttggaaattgcactttatccaaattttagatttctgcaatacttgttttagtaatcagaatggattccaagaaagaggagaaa  
gtgccttacaaccattcagaaatagagaataataattttcaatgtaaaaaaaagaaaccaataaagggtggaatttctaggtttatatattac  
tttgaattgaaagctgaatttgatcaattttatgagtaacagcataacttaataagttgagtaagaaaaaatcattgaaacaaatctatctaa  
tgagttagataatacatgttttctactacatagtcataaagaatagcgcataagaagccctttaggaatatcatgacaggtggcttgagggttag  
tgctggcttagcgaagtaaccaagaataattagatagagaatgacttggaccatattagtagcacatatgaaaggatttctgttacgcga  
ataaaaaactcataaccgaattcagaattttgggacataaacaacgtagttcagagaaaaggtagaggaagcaggtatattagaca  
attcggtcagagccagcaagagtaagccaaggatagtaaaagaaaaaaatattctagctgtacgactatttctgtatttagcgtgaatga  
gttgacggtttccaccgtaattgaatcagctacactcatagcatcatatataactttccgctatagtagattgagcggaaagttgagtagatat  
ttctgtctgcaatctagcaattcagttaacgatttctgtctatgacttgttgcctgatgctcaaatcttctgagcaagagatcatttctgtt  
ctaactccattagctgcttggctaaataatttgaagctcagaatcaggaatttctgcccactgacatatcatttctgtgtggatgcaagata  
tcagacatgatcgtcttttctttagcagcgcctcagtcgcaggtcttgaagtcgatacaaaagtggaagagagcgtctgatattcatttgcagat  
accataagatagaagaataatgagcaactatggtttcggtttctgaagttttcagggctctaaagctttgcaacctcccgtcgtttgggaatc

tggattgttctctagatgtatcagttaatactatgaatggatcagtaacgctggttcaaataccttcaacttctgctgaagagagctaattttctg  
gacgcaagagttgataattgttgatgcttgatggtcaatttcctctgtaaatcattcagctccaacttgaaagctcctcaaaaagacattcc  
atcaaaggccttgacaacttgaacattggaacagtagacaccttcaaataatgctccacgaatcttcaagaaacgtacaagaatgaacaat  
cgtattgtgctacaataatagcggatgaataaacctaatatagaaaaggaattgctgcttagaaaagagaaggggaacacaccctttctatg  
ctatataatgtccagggtcaaacctcctctctctagtgtcaaccgtaattcgttcaaataatcaacttacgattaaataagcttctgagaaa  
agcatctgaacggttgaaagcttggccttgcagagaaacgtttccaagccagcttcttttcaataatccaaaaactcgttcgtcctgc  
ttgcatgttccagcaaatatgctttatataactcataaatacaatccaatggaataataggatgattccgattctttaaataaataacc  
agggttttctttcgaagagctgtaagactacagattctcataatagcacaatctagcgaccaacgtaaccattggaagtagtagtaggatta  
aaaaatgagagctagttgcttaaccattctttgtattgttttcaagcttgattatgcttagatgctgccaaggttgtttgcttacct  
cataagttactgaaatcactttagctgattgttaacaaacaatcgaatgcaaaatttagacgaattggcgaaattgataggattcgatataa  
aatataataatgctccaaattgaactaaaaagcttgaattaatcgattgaaaggtttggaggaattcgatgtatactgtaactgcgca  
gtacacataatctgctcggttcccagagttgctactttaccttatcattattgtacagttgtattccttaccataatttttttgttcgt  
acttttctatctctatatttattataaaggcattaattataattggcattctatctcgtccaggttcttcttcttgaactgggaagcaatt  
ccttctcgttggcaaacctgcatttttagtccatccactttactgctaaagtaagttactaaggatctttgttttctgtttatcttaccggcg  
tagctccttagtgaattgctttctgtgattcacatccttaattacctaccctttcttcttttctgttccattccgttgtttatttagtctg  
ttttgaaaatgctcactcctttcagaccctcagaagttgattctagagattatgcttggaatgccaattctacggagaccgttccggcact  
ccttcgacaatgtcactttctgagcagtagtgggttaagcaacattctattacaatcagagaatgaatctcgaagatcgcttctgattggtcaag  
aatctgacaattcttgcaatatagtgtcccgaattgtgtagctcacaataaaagttttgacaagcttatcggaagcaactgaaataag  
aagaaagatcctatggacgataggcttttccaaagcctctgctgtaaaggaatacaagatccctcaaaaggctaggaaattatggccccg  
atactcttaaccaaagatgttagcttttagatgaaaagacgtatgctgtaactctgaaaagaattgactttacattgaaaaggctgcaag  
accagtgaatctggaatatttagtggcgtgaattgcaattacaaatgagccgttgggtgattgatgaattgctgaaagaaatggtgtgaa  
agctgtgacggcttacgaaattgggcccacattcccgaacgtcatgcaaaactgaagcagaggtgtgtgattcaatctttgttcattcctta  
aatagcaacattggccggaatcaccttatttctgctccaaatgctgttcccggctttaatgcatcggcacttagctgaatcaatgtttccaa  
gaacctaatgctcgcctatttcaacattttttgaaagctatttgagtcgaaaattgaaatgggagcagcattccgtcgtaaaggccttagag  
tggttagtggaaaaggctgcgtcaaaaactcgttttagcagatggatgaccgcttacatgatgttgatctggcattcagggttacgccgataac  
ctaataatccaacaaatgaactggcagcctacaaggaacggactgtttgattgattttgtgtggttaccttaatactagtggtatattgct  
atgtaccattgatcttcaagatgtaacatacgcctgcaattctgaaatgctgggcttggcaaacgttggagataatgcagcgtggaaaaa  
catttctgttcgacgggtgttgaatcttttaaatgaacacaattctgatgcacagctttaggaagttcattattgctaattctgaaaagaga  
gaaatcagaagctcattttaaagcctaactaatgtaaccaaggtcagctgcctgaagacacccccagcagggcgaatgtaaatgctttc  
aaaaatgttctgcttaataatagatcatgaatcctaaactgcttcaactctactcaatccttagtaaacgaaaaggatctgagaaaattga  
taaatcctatgctatttagttttagcttaaatgcaatcgacgaatataaatccgctgctatcgactcaaactcgtgttttaataatgtatcaaaa  
gattacttgaccgcatgggcacagctgatgaattatctgattataagaccaggcagagcgagtactcttggaaaacaaactttgcacgatcag  
gtggatgattgtgtcagcttaattgctggtcctctgctgactcaatccttaaaagtaactaaatgaattgcaaaaagaaatagatcaa  
agagagagactcttggcgtctatgcaacgtgaattcgatggcgctataaagctcaattacaagcttatagtaaactacaatcactagaagc  
cgctcaaaactgcagaaaaacaattttagatgatggctatccttctggaagaccattgtataaaaggctatcctcaagattcttagacgcaat  
gtctaaagaattgcttatagttgtttcaaccttagaagattgaaactatattactccggaatgacgaacaagaatcagaaaactgagtc  
agaaatcttcttggaaagatgcaaacgaagcaacttacaacaaaacgatattcctagcctgcaaacctgcttagccctacaactcaact  
cggtcctcccctctctctctctctctcctcctcctccggcttaccattgggcttccgaaagtagttgtaccgccagctacagcaggtcctccaccg  
accagcactccttccgagctggggccttaccacctcctccccctctctctcctcagagttacactgggtgtagattcgtggctacagccc  
agtacagacttctccggctgacaccaaggaaggcactgtgaaaactgaagaaggttgaagaaggaagaaaggctagacaacaaaga  
gaggaagcggaagaagagcaagagaagctgtggaagaatatacaaaaatacctagctcagagactattaagaacctaaaaatcagctcaa  
gctgcttattgggaacgtgtgaacctcctctggatccaatatttctgttaagttccaatagacctcgaaacgattggaagaactctattaaat  
agcggctggttacaatatttagatgaaaagttgacaatactagaagaattgaaacaaaggctatcttaagaagctactaccacatcattct  
atctcaaatgtaagcaacatttggaaatcgtgtgcgttctgtttcagattcacacctgaacaatttagtacgaatgtttctgactgatccaact  
tctacctctgctatccaattttccataaatctgatttctactcaagaaggactttatctcctttgctcctattggactgattacagcaaacct  
gaggacaagcgtacaccgctaaagatgacgttaatgaaactaggatattatgagagattttgttttattatcgtaaactgagacatttttca  
acagcgtatgtatggcttacgattacgtgagactttcataccagagcttgaaaaattgaggcccacgttagaaaagtcattgatgtatgcaggtc  
aattttagaagacgaatattttctggattttccaagtttacttaacctgggaaactataataatgacctctgataaagctgctgattctctt

ccaatggtttatagattggaacacttcgagactgcacgttttcaactctttacattactttgaggatatcattcgtaccaattccagaatac  
gagaagtctgaagcgacttttaaaaaatacagctattagctcttacggtattgatggattagatccgaaatggagctgcttacgaacatttt  
tgcattttaaaatgaaattgaaaaagggtccttctcgaacgtgaggagcatcatccagaggacaaagtattgatgctatttacgaatggtac  
caaaaggcctcagagaagataaaaggctttatggctttaaaacgtgatttctgcaattaacagaggatactgtaagtatctatgtgaatttaa  
gacgtggagggttgcgaacactttttgaagaacctaactcattctataataataactgtaacgtcagaaatgataatgcaaaaaacgag  
cgtgaagctcaagctagacgaactgaagaatctaaggagctaatcatggagcgtgaagaaacgtcaatggtgcacagtatagaaggaactt  
ccgggacagaccaacgaactgtttcgaatcaggatcttaatacagatatcggatcatcaaggccattgatagttcggaaacgttagctgatga  
aactcctcagttatcggatgatcggatcaagaacttcatgatacgttctcagtgagttaggtaaacaaatctccgaaggcgtggttaagaatc  
aattaacgaagattctgttagtgagcttggttcagcagcaaggatgaagatgctattgaattaacttctgaagccgatgatatcgctaccaaggc  
aaaatcaatgctgcttaaaatgaaaaatagcgagaaaactggtactaacgtgaaaatgacccatgaatacggatgaagatttttgcgagca  
cagctaaaagcagccaatcatcctcaaaaaatttcttacctcagaacaagaaggaatcggttgaggcgtgtagcaaaaagcatttttagc  
aaattgacaaatcctcagctaaggaattacaatcgtgatgatcctctgcacagtattataaaaaatcaaatccgttctttttgtagatttaag  
gatagcaggattgaggagctactttatatttttcatgactcattacgcgcaaattgctcagtaactctactctgacattaatcagaatgag  
gatatttttacagacatggcttgacaaattttgatagtttgaatgaggatgagtactaagaaggaaagataaaaaaggccttgatagctcca  
aggaaagttgatggtgactcaagttcatgacgtttaatgtgcatatatggatgggtttctccttattcgttttaggattatggttcgcaataga  
atgagaactatattacatactcacgggatcgtttaattcttcttttttatttacgacgatgatcaatgatgggacaaaattttattttggct  
ttagccgttaatgtgtttctaaaaagcaagggttaaaatggaatgcttctagatggttaggttttttttttttttttttttctgtttgcaatcatag  
gtttaataatattgtaagatacatgagccttaattgataattatagccaaaattgataatctgtgaaaatggtataagaaaacgaagaaactta  
aaagtataaaagttcaaaaaacaaaataaagactatgagattggatagtaatctgtattcatcttaagtaaatccaatttcatccttctcat  
tgccttttattatgttacctgactcgaagtaacgagaaaaatgttcaactgaagggttgtacttaaccaagtgtacagcaattctaagttattt  
actgcaatgtttcggtatgaaacacttcatgctggatgaaccgatttcagaggcagctacatggacaaaacatttcggattagtttaggcgctg  
aaaaactcatagcgattgccgatcctgtaagatttagaataaagaatttattaaggaattaagaagttaacataaaaaatagcaaaaggaga  
tacagtatttagcggctacacgggaagagtaaatgtattcaggagctgaatgttgaaaaatcattgattatttcgggatcgtcggacaaga  
cacttcgctgatgggagaaaaatgacagcaatgactcctttgatgttctcaacgataaattggatgggtacacctgaaagccttaacatcaatg  
gcgatttggttgatgttggtgcacaaacagcaagtgtgtggtcttctcagtgaaaggagcagggaaagatgctggaagaagcatcacgattgat  
actggagagctaatcccaatggatctaaaaatgataaagtttaaggatggaatgttttggttggctctaaacgaatttcggttatg  
gtagcgataggacatctcttagtttggtttaaaaccgttttaacagggcatcttgattgggttcgagctctatctattcgacaaactctgagtca  
atggctacattagtctctgggagcaagatcgttatatgacgactttggaaaatttccctttgggaagaaaaagatgaagctttcagatgagtaa  
gtttattactacctgaaatgtataactaattttatcagatttgcgaaactttattatccaacaagcccattcgtttcatgcttggtggagtggaat  
aagattgttttgatgctcttaatgggtcatgaagattggataatgagcgtacaatggcatcctaaagaagagattttttatcttcatctgctga  
ttcttcgtaatagtggtggagccgatgtagctactggtataggttagccaacgggcatgggtgaaatagcgtcctctcacggatctactact  
gcaacaggtagtctggtggattttggggaggattttggagccccgatggttaatgctgctgctgctggggaagaacaggaggctggagattatg  
gcataaatctggagaagattgggagcaacttcctgtgtctccggacacacaaaactgtcaaggtattgcttgggatccccagggtcaattctt  
ctttacagtgagtttagaccaacaactcgtctgtatgcttgttaaaaaagataatacatggcgggagatggctcgaccacaaattcatggcta  
cgacttaactcaatccaatgcttaccacacggactggatttattagttgtgctgacgaaaaagtacacgcgttttgagttccaaaaacgatt  
gccagattgttatcgcgtctttgtctactcagataattgaggaaaaactccggaggcccaatgttctctcttgggcctttcgaataaagcaac  
cactgctactgagacaggtagttaaattgctgatgaaattcaaactccattaattgacgtgattgactctttgacatccaccattgaagagcat  
ttacagcgtttgctgcttttccagaaattgagaaaaattacggtcatggttacgaggttttgcgtgcatggttcgatagaggtgattatagc  
aactcctgcaaatccagctcctgaacatgcaatgatccgtttgttgatacaaacgtttgaaacagcaacaattgctatccggtcattcatta  
actgtaacaacgattaagtttcatatgatgataaatacttgttgacagcaggacgtgatcactcgtttgtattcatgaattttctcaggcagaatc  
gaagtatcgcctgatgtttatcaaaagcattcccgatttatatgggatgctgctgggaccaaaggacatgggttatttttctacagctt  
caagagataagatggttaagtttggcaattttggatgataaaaaggtaaagacgtagtaggtctgcaatttgagatgctgtaactgccttgg  
atattgctcattctttcatgataatcatcttttactggcagctcggtacagaatcaggaaaaacatagctggaagtgtcctaaagataatcaac  
gaaatggactccttaaggttccggatacaatgtctccaaggaaccagtaaaacaaatgcttggagaccaatttcgaaaaagaggggagag  
tactctttgttattagctggcgaagacacgtcaattcgcagcttctgttacagctcaattaaataataaaagacgcgatagagtcattgg  
gttttgattttggacaacgccagataaataataagtcggaagagcagcttttcttaacaataaaaaatcgtgttcttgaataatgttggttac  
ctctgaaatgtatagaaaaaaaattactttgatcatcttggatttttctaataatggagttgcgagatgactagtaactatcgattggagttggg  
ttttggttttcagcttatgactaagatagttgttttaacctaagtttagtaactgaacaaaaaggtagatttatattatcatgagtagttaa

caagtgaagggtgttttcattagtgttatcatatgaaaatgaagttgaattcggttatttactttcaatgtttttataaagagtcttaagtgcttca  
acaatacaaaagccgtaaaataaaataaaagtagggtaaaagtaaagtggttttaagtatactttttataggacagtcgacagttggctatttaggt  
acattttgacattttctcgtgttttctattttgtacccatgtgttacaccaagatgaaatgctttctcctaactactcacaaccattactaatttag  
agtaaaaagagcgaaccataagactaagaactgaattttattcttaaaagaaaaggttcgtaaaaaaaaaaagatcgccatttaattgaa  
tgaatttctagaagaaagtggttactgaattcttctgttttaactcagttactattatacaaccaatacttattgtataaaagtttaattaaataaa  
gccttacttttctgatctacgaaaactgcttctcaatcctttattttattgtttcccttacgccagattcatttgaagtgaaccgtgcctttcacttctt  
aacttagattattagtcttcttctgtttttatctgtaccttcgttcattcatttttttaaccataatgagtcaggatcaagaagaagattatacaa  
agttacctttggaaacgagaattacacaaaagtttgaaggctcgtctaggtgcttatgaggaattaaataaatcttttcttcttgctctccg  
acggatccttgctttgacctttgggccgtcaaccgatttatggaggtcgtccttcgagatagcaatgtcgtgctcaaggagcaggtgttactg  
ctttcgtatcgttctgtaaattttcgtacccttcttatacgttaaatgtagagaactgcttctgctgccatttcagaaaaatgccttacctctcgagc  
ttccacaaaatccgatgctgttgaagccctgatgtaatgattgaagtgatgctgcaggtcctgttattgatgcccttcttcttctgttatctgctg  
gtctccgaaagtattacggccaacgtatcggctatcgtgacttggcgaacagtttggtaaaaaatcgttccgcaaaaaccaattgtggcaca  
attaaagtcactatttgacatgccgataaaaacgtacgtcaagaaacgttccgattaaccggtcattctgtatcgtggattggagagcctttaa  
agcatctatctttgggtatttgaaacctgttcaagtgaaggagcttgaagctctattttcgaattacctacggatcctcctaaacaactcgtctat  
taaggagtcaaattcccagcaaacggaagctactgacgaaagtgaagaagaagatgacatggaatacaagaggagcaaaccttcaggag  
gaagaagatgaattgatataagaagaagtagatgttattcctaagattgattccaatctggaatccgtaatgctctgacaaaagtgaaaga  
gcgtaaggagctcttgatgcaactcctcaatcctcagcagcaaaaataaaagatggagaattttcgggttggtcactttgttatctaaagct  
attgtgaaagatgccaatgttatgggtgttatgaatgcagcaaatgacataacggcttagctaaaggacttcttctaatattctaaatgcca  
ttacttcaatccaagcacttttgaaagatcaaaaagaaaaaaagcaaatgtcgtagaaacattgtcttcagcaatggatgctgctgtgaaacg  
atacctttcgtatgaaattgctgaaccatttccgcttttctaacaacaaaaccctcagattaaattgcatgttttaattctcaaacctgatgttc  
cgtaaagtgttcaataaccttcaaagtttctattgaagtggtgtaagcttgtgttccgggagtttccgacacattcgaacctgtacttctg  
gcagctgaggcccttggaaacccttatgaagctagtaggagagcggccattagcagtatacttgatttcttggacgaaatacgaaaatcga  
aacgtccttttctgagctgctacggttaaggctgtagcaccaccgaaacaaaaccggcacctacagcttcaagaaagcctgacactaaat  
cagtagtaaccacgaagccaagattatcaaaaaccacctttgcctccatcttctactcagctcatcatttccctaaaaagaaggcgaata  
ctgagaagctttttaaagtggagaaaacgaatgcttttgaagtgacctttaaagccttcaagcaacaaactagaccagttgccctggctttt  
ctcgaattcaccacttttaataagctcccgttgaatcgacatcacctctactgctggaccataagccaaacggttacaaggaataaaaa  
acatggaattagacgatcggcacatcagccttcaaaacttcaaagacatcctcaattacttagaattgaaaactaatcataacggctcagtc  
gatgaaatcgcttcttaaatgaagagaatgaagagcttaaaatcttattatctcgtgaaagagatgaaaaactgtttgcgaagagaattaac  
tgaagtcaagaaaggaactaaatgatctgtatgcaaccttcatctccattaatgatcgaagatcgttttttgcgaagagcattcaga  
aatgttagacacatcggcaggtccaagcaatcgcattgaccttcaaatctccattaggaagagcaagaccttaagcttacaggctttaatca  
gcaactcctcagcgttttcaaatcagcaataatcttctgttcaaacagatcctccgaaacagccattttctccacgctcaaacctgacttcag  
attggagtaaagcaattgattgacaacgaggttgaacaaaagattactgaaatgaagcagacggatataagacatcagggaaatgattcattg  
aatactcacagaaaagaaagatgttttattgtttgttataaaggatttgcgtataataatggttaatttggtaaccttaagaattctcatg  
atattgtttgtttatcccttgaatagacctttgttcttctgtgaataaaataaaatcaaatcaagtgattaataaactatgggttaatcataata  
aacaatttaataataagaatgaaattcataaaaataagctcatgtactattagatcaaaattaatagaaggcgttaacggaagaacgaagg  
ataattgtagtcttcttagaaaagccaggacaacaataaacaacaaaacataaataaccttaaccgcttttgataaag  
acggattatgagaaatcagttatttgaatgaagaaatagacgaagtcgttaccttctcgtcgttccaaatagaagtaaggatcacgactag  
gggaataaggaggagatgggacaattcagaatctaggttctgatgaaagatgaagacagcagtttaaatcgaacttttccagcttgaatgt  
aactttgtgagttctaggtgaatattgagataaacctttaaagacaactcactagacgattgcggtgactgttattttccgagctaaatgcca  
atttgaaacaaggatgagctagatctgaaagaagaaaataaagagtaagatttttcttaagtgaagagttagatgaaaaaccttttttagta  
gaacagttgatggttctgaagatgaacggacacataaaaattatgctttcaagaagatgaggattttggttacacttccatggatggtgtctt  
aaaggcaccataaattcaacttgaatgaagccctggtacagtaggggggtccagcgtccatcctcgtaaaggacggttgtgatactctga  
agggaccgttgaaaaagtaaaaagtgacttttgaacaagacagacatgataaaaatacctttcataagtacattgaggagcgggagaagaag  
cacggcttttagcatgagatgatttatttccaagttcgagactaagtcgactcaagcgtctggtatagaatcagcagattcatgtaagctttt  
cgaagcattagaagaaggttcttacaataggagtactgtaagttttccggatacgcgtttagatatttcttctcaggttgcgctagttcga  
aatcgataagaagggacatatgcaacctggacctttgtaattttgtgaggatacttcaactaaacttaaggtctttatgttttttagtgacaac  
acaagttcgtaaaagagtcctggtttaaaggaagaccaaatacgaatgtgatcggccctggcatcgggtcgggattcagggtaaaaggtacga  
caacaggaacagtagcgtatcctaggcattcggcaaatatcgtctgtccttatcagctcaatgtataatgaatagcaccatcaggcgtaaat

attgttctcggcgtgtacctaggaaggggtgctatgatatcaaactgtataacgttccttcttgaccacaaaaattccctcctagattccactcaat  
gtgattgaagtgaattccagaggaagtttattttcggtaggaacgccttgatgcctgtaaaaaagcccctatgcgcttgagaaaaatgtatc  
tgtttagtgaagtatgctgcgatactttaaactgaccttaaatcctcgacattgctataagatctgaaactgtccagtatatggagttgtctct  
tgagtggtccataaatctcaattctaattctctcttttgaagtagagattgagctcattccattcgtttttctcaatttcccctctattcaaatgt  
aatgaaccgattaactcgattcaatcttcttagttcacggatgatttggcagtttttcttgacgatttggagttattacgtttagttggttataaa  
caagcaatgacagtggaagatgctatcttagatacagatagataccttataattcgtaataaaccttaaatgctttagcgaatacaaaaaaat  
gtagtccagttatacaactgattttaattaagtaggcatttggcgcgctatattaattcgttacaaaacaaatgaaaaaataacttggagtt  
tggctgttactttaaacggcaccacacgatggttcattttagatacaactctcattcaacaaataggatgcaccgaactgaatgatagcttct  
tcagcactgtttcttattttttttaaatttcaataatacaaatcgaactttaaagtcaattgaaagatacgcacgaaagacaaaaaga  
gaaaagatacaaacgtattcatcaaaaagtttattttctgctcgaagcagtttaagtccattactggcaatcaatgactgtatgcatctgc  
gaatatcatcttctgaatatacctttttagtagactcfaatctttagcgaagcaaaatccaaatagcgtctaagcaatttaagtagaatcacaac  
cttcggccaagcttcacagcaaaagcattcaagaattaagcccttctaaaggatccactataatgtcatttggccaagcaagccatccc  
aaacgtattgataggagtaacaattctgcagaaatggttctgtagttctaccttctgctcataagctataaatgtagtcttggatggattcgggaat  
tgctgaacatcacgcttgcgagatgaataaacaacctgttttagattgatcaaaaaatttggtaaacgagcctctgatcaacctcaattgagcc  
agaagatgaagacacgtacttttctgctggtaagcgcatttcacgatatttggcgaatgcaccagcaattatagctgaaagaagcgataaat  
cctcactagaattccatgagaattcattgacttcagattaatcacaagttcaacattttagtagcatcgcttaattctgacctgtttgtcttattg  
ttgatactttaaacagaaatgattctatgttaataaacaattagacgggaaacacttacatcatgacaccattgagctgtttttcaaac  
cgctattttcataatctcattccactggtcgtatgctttagcatctgttaggacatcaccccaaccattacttagattagatcttatactcgtgcacc  
atcgtcatgcaaaaatggggacttcgaagacaatactcggagatactaaagcaggttcagtgaaatccgaataggaggctaaactaaagt  
tttctagctttaaactattgtagagcaacctaattgttagtaatacaataagtaaacgacttaccaaatactctccattccagtgagtt  
cttctttcagttaacgcaccaacctgaattaacttctctatggcagatccactgcttgatcagtaggaggactaaaaggtagctataaat  
ttaacagcaccttgtctgtctgcatcttaccgctgataaaacggcttactaaaggatgacgcttaacaaacctgtgacaaggctgttcgaaga  
acatccgggggagctcatcagccattctttttctcaaatcccctactgtataatttgaagcatattccttctgaacacgacctgtctacctctc  
gttctcgaagcagctctagatgccatgtctcttgaacgtaactaaatcccgatcgagatcatagtcaatctgtttcaccttccactgtcaata  
accgccactacgctgtgattgtgatcgaagtctctgccacatttgtgaacaaatgacttttctttctataagacttaaaacttctttgatccg  
tagtattcaaagaagcatgaagaggaagaattcaaaacctaccacattccgtttaaatttctgcatacaacggttaatgttgaactcctgg  
tagaaatattagaatgctacccttattcaagccgagttcagaattaatgttttacgagctgggaaataagattatagtcacttcgtagaaacc  
atttctttttcgtaatctggttgaatcctcatcgcttatgaaattgaaatctcaatataaagatctcaatgggatacgttctgccttcaat  
gaaatgcttagactttggaaaatacgcacatgaagcttcagcgttcaactgttgactcataagcacaatctcaagttgggtatgagaggtataat  
aagcttagtaaggcaagaagtatcgttatcaatggatcttcatggacttcgtaacaacaatgcatgatagagtagcaagatacgtgaagc  
catgcaactggattcttctcagtaaaaaccagtagtgcaaaatctaataaggttcttgcgaaatacattatctccgtgtacactatagccaac  
ttcacttccaaagcagtagtcttcaaaggaaactcttcagctaaactgattgctgaaattctctaggttagtacaacaacattagcgaca  
ttaccgaccttccgagagaaaatgatccaaaatgaattgaaactactgctgtagattaccacttccagctcaccactataactatggactgac  
agctttagtaaggacgataatagctctttttagctgaaagcaggaagggttctctatcttctgcttctgtaaatattctgggctctttgtctatct  
aaccaaatttagtagactttctatcattttggggtcacgtttaaataatctcggaattttgcttcttttgcataaggagataacatcttagctt  
cgatacatccgttcaattgtaaccgacgaaagacttaataaaggttcaagattctttagaaaactggtaaattttctgcaataatcatataaa  
atgtcaagcataggttctcaacataattatgagcataaagaagtagcttctcactatacttagctttatagtagcattcttttagttgaaga  
tataaatattataggtatgttttaggataaggacttagcaggcaattaaatcaatataatctgcccattcgtcggagcgtgaattgagctta  
atttacaagaatccttctgtacagaaacttacttggatattgattgaagcgttctgcttctccttaaagaaagtaattgaatcgtggaaaat  
tcaggttatcaggaattccttaccacaagatggaattgaaatattctcggcaagtgccaaatcatttctgaatcttggaggacagagaaa  
gaaaagtcaatgttagccagcatctcaaggcctatacaaggtgattagcaacagaaaaataagacaaataatgaagaaaagagtttcat  
acgtttgcatgtaatgaatagcaagtgtcagagttattttgaaatgtaacaccaacattataatcagaaggcagaaatcttcaggaagg  
tcatctctggaacatgaataatcaaccactctagcttctctaaaggacgagcaatactgacatgcttcttctgtagtaagtctgaaatcca  
aactactaaatctttactaaagttcttaagacttcttagaacctcttttctcgtatccatcccagatgcttaacgagcgtgaagagatttctat  
agactgacgatgattaaggctcatgttgagagtaacagcatgttgaatcgtactgggaaaaatctgaaagacgagttccttctgtagaagaga  
atgaaggttgggaagcttgaacaggtggtttgctgaggctgttactcgcagaaattctgcttcgcttcttgcagctttaaacgggtcct  
cgtgataaagatactgtctatttttgacatcttcttttctgttttccaaatccatataatctctatagttggaggaagtgcagctgtaaa  
gattatgggacagaacctagaaacaaatttgggttaactccacaatagcacttttatcacttactctgtgtaatgctgatacagctccgacatt

tctggcctctaccaacgtttcttttcaggaaaatagccttttcgtaaaaggccttgggaggagccaggttaacatgatcaaaaacagatgagttt  
tttggatcccttttcgataagcgtgcggaagtgaatatattgtttggattttgtttgttctgcgttacggatactattagaagctgttcaattaagt  
tagtagtatcaactaccctgtatataccgactttccatttacttttctggcaatgctcatttaataatacaacagggttttaccagtccatgaa  
cttccccccaccaattgcttagctgtaggacgagaaggagattgggctccgttttatttctactgtctctcgagttcctttaccggctggaccact  
tttttttgccttaacattttatcattagaatccttttatcaactataccatccgatggttttcccttttcccttttggggccatgctccgtacagttg  
gaagaatgacaaaaatgtatatacatttcgagggttgatgataagaatagagttacttttcatgcttattccttgttacttaactactaaataatt  
atcaattatagtaattaaactgtttgtaacagcttatgtccagtttgcacatgagcgaagccatcagtttcaatgtcttgttatgtttcaataa  
aagtaaaaatagattcataaataatcataaataaacaatagacggaatcctagctacaccaacctcatgaaactttttgctgaaactgc  
tgaatttcagcctttcagtcacgtaacagcttgacatgttttactctgttttggatggattttcagtaaatagtttaagattcataaataaaaa  
aaaagtacctagcctgttttaattgcttgaattccttggcgtgtgtctttacaatttgtttttcgagcacttagtcattcataaattcaaaattatt  
acatctaagtttgtgattgtaaaaagcggcgttcttctgcttatgtagttcgccattattttttgcctctactagacttactctcaacaaactac  
cctatttctagatataattgagagcttcacagctaagcttccctcatttaataatcattctttatacttttaattggggtaacttgccttgaaaaa  
ttttgggatcaattcctttgatataattgaaattttgaaaaatggctaggggaagacgtgcaaatcaacgcgataccgatttggacttagaaaacaat  
caaggtgagattgaagctgtaaaaccagctcctaagccaaaaacgaagaagaacaaaaagctgccaagaaggcagaagtttttctgatgaa  
gaatctgactccaattccgatgtaagcaaatcaagaagaagaagaagatttctcctcccaagaaatcttctcgccaaaacaagaagccagt  
gaatgcctttgctgatttctgatgagcaggaagatgaagaagaatcgaattagaagagtcagttgttgatgaagcccaaaaagaaaaag  
aagaatgacaaaaagacaggtcgcaagaatgctttcgacaatttaacgaagacatggatgagatgtccttgaatgacgaggagaagaaga  
gtcttctactccaagaaggaaaagaaaaaatcgaagaagcggatgaacctaagaaagaccgcaaaaccgcaagaagaagaagaagact  
cgaaaaatgactgcttattggagcctaaggaggaagacgagaccgcgtaagggcctttaatcagaacaaaaattgaaggtggtttac  
ttcaggacgcctcattttgctatgcttccgggcaaaaagctcggctgatggttctgaccttcagccggtattaccgttaccggcaatttgcctca  
gccctcccaatagccgtgatttcaagtagaaaaatctctgtatccgcttatgtaaacatcttattaaggattctgaacttagcttaatcaacggt  
cgtcgatatggttaattgctccaacggaaactggtaaatctactttacttcatgcaattgcttggacaaatccctgctcctcagtccttagacttt  
tattttggatcgtgaatacatgggtaattcacttacctgcgtggaagcggtttggacataaatgaacaggaacgtaagcaccttgaaccgta  
atggaggacctactcgtatccagacaagaatgctgttagttagatactatccaaactcgcttaactgaactgaaactgataatagtgagcat  
attgtttataagatccttaaaggttgcatttaccgatgaaatgatagccaagcgaaccgaagatttgagtggatggagaatgcttattgct  
ttggctcgtattttgttataaacctactctttagtgctttagagcccactaatcatctggatcttgaagcagttgcctttttgagaataactga  
ctcatgaaatggaaggtcactttgttattacctgccataccaagatactttaatgaggtttgtactgatattatacatcttccatcaaaaga  
cttgattactatgctggttaactacgatgtatttctcaaggtccgtggagaacgtgatgcgcaattatcaagaaagctgcaacaagaaaaaaga  
catggctaaactcaaaaataaactaaacatgactggaagtgatcaacaaaagaaggccaaggctaaagtgaaggctatggacaaacgtcttga  
aaaagataaacaatctgtaaggttctagacgaagaatcattcaggaacaaactagttattcgtttcaggaatgtggtggtgatccgct  
ctcctgctataaattccaagatgttctttaaactatcctgaaggcctactatcttcttaagttgaactttggttagatctgaattctagagttgc  
tttggtaggcctaaggtgctgtaagactactttgattaaattgatccttgagaaagttaacctacacttggaaagcgttgttccatcacggtc  
ttcatttggctttatcaatcaacacatgggtgaccaattggacatgaggctatctgcagtagattggcttctactaagtttggtaacaaacctga  
aggtagatgagaagaatcattgctgttatggccttactggtaaaagtcaagtcacccatgatgagctttctgacggacaacgtcgtcgtgt  
gctgttcgctttccttggatgactcaaccacacatttacttcttgatgaacctacaaacgcttggatattgataccatcgatgctttggctgatgc  
actgaacaactcgtatggtggtgtagtttcttaccacgatttccgcttattgatcaggtcgtgaagagattgggttggtaaggatggtactg  
tgaagagtttgatggtgaaatcgtgattacaagatgatgcttaagagcagattgctaaggatagagaagcgaacaaacagcgaattgg  
ccaaacaaaaagtaaggctttagatgatggtttcagattcatttgataaattcataaagttttgttttagtcggttggttataatttaaaaaata  
aaaaacatctatttctgacatgttttaaaagatgataatacaatccgtagttattttgtattttcaaaagttccttaccagtaacctagactgt  
ttaacaataaatcgatgaacttctaactctaattaagttgtatatgaaactgaaaagtaattaaaaaaatcaacagctacgtccttaaaaag  
gttatatgacccaatccctatcatatctcagcgattacttgcactcaaaagcttactgccaattcgagaatgcatctcaaatctcgtaaactt  
ctggcggcattgttcggtagtttattgttttctttgtaaatgccaagcttcaattagaggattttctgaaagtggtatgttcatcgttggccatgaat  
tccatgcatactaattattgaagaattgcatctctataaaccactgcaaacgggcaatggaaatgtttaggaagcgataaaacgattggttttga  
acaaattaatggttagaacatttgaaaaactcatgatgatgtaacacataattgaaagatgactactgtgatttccagatggatctgatgaacct  
ggtataatataaatttgaagctgactaattgattttactaaggacttctgcttctcaaatggaaagttttctgcaagaatgatggttacatt  
agcaagtacattcctcaaatgggttagatgatacgaatgagcactgctgcgacggttcagatgagtttaattaagtgtgaaaataacttgaag  
aaagaagccgaagtctataaacagctttaaacgaaacataatcaactgtaaatgatggcctaaaaattcgggatgactggatagcccaagtg  
ctgtaatgaagaaggaaacaaagagaaagtagcattcagtgaaataacagaaatcgagaattgaaaaaagaactcgaacac

agtgcaaacgttaaacagctctcgggaatcagatagtagattcgttctcaactgatttagaagaaattaagaatgacttattcaatttgcttgat  
gagagaaatgagtacaatgaacgtctgagtgcttggagaatcttttagatgaaatctctctcagatgaaacagataatttgatggaacattg  
aaagaagccttgattcttgggaggatctcaaatctcaaaacataaaaagaaaggttctcagaaaaattcacaatgacttggaaatcatcttt  
gacacatctttctcgattgctaaagaagaaggtacaaactttcggttaaaatattatagaatgttttgagtattaacaaaatagactacttatt  
ttagcttcttaaaaaaattgagaagacctaacggaaatttattggaatgtgaagcgctcttaattgatttcggaataactaagcttagtattcct  
gccacattataaaaaaggctgaaggaggtatggaagccttgttaatcttctgacagttgaaacttaggttcttactggagcgtattcattctgac  
ttggatgcagcagaagatgaattggaatctgcataaagaacaggctactcttcttgaagatttcaagagcaccataatggttgggataatct  
gtatcggttcatgaaaggatgaagacagagcttaagttggtgactatctgtacaaaatcctttcttggaaaatgtttatcaggattctattaatt  
tagggtatgagtgctttttcatttttggacataatgtctgataccttttaggagcttttcagagcaaagtggaaacacacttaaatattgaaagc  
gtcaaagctgttggaaagcctctgatcgatcgccacagctcgctgttattgctggaactgaaaacgaaattgttagtgttttagaagctcaaagt  
gtgaatataccataaagatgaaaagctctgcagcttgttccatctcaatctcagacatccttgttgaaggatgacaatgacgttctctgatgagct  
ttagattgactacttttgatactattataaaaaatatttaaggtaactcttatgaattactgtttttatcaatacctatttcgttgatgagcatagata  
ataaaggatattgtatttctactaatgcatacagatgccttacagaattagacacctattcatgagtgaaatcagtgaaaatgaaaagggaaa  
taagtataaaacttaaaaagactatgaacctattagtctattatactttgttgagactttgtaacgagcgacattataacatttacgagctccg  
ttgtttcgaccatcaacgacttcaaggcatcaatcgattagaaagggcgcgcatacaagacgatgtaaattaaccaacaacttaaaaatgta  
attgaagtaaacataaacgcaagtgaaggatactgaacattaaaagacgatcatagagagtgaagatgtccagcaacgagtataagagtta  
gaatcaacgggcaaagtagggcaaagacttagaatatcaatacactaacgggatgagtaaaatacttgggttcgatcacccgtacatttgctcg  
gtgacttaacaactctattagatgagagtaactgagtaaaatgggtgattgctggtatttttaacatgactttgggtagacgagcatgaagaag  
aattactaaaccaataaatcaatgtttattatgattgccaacaacaggaatcaaaacaccgcaaagaacagcgactaaaatacagacgataag  
cacgcaaacaccgagacagatccatttctctcttagcggctctggcctctttagatgacgatccatattgttgtaccctcacccatattggttc  
gtacgttgacggcgtcgtaactattttatcaacagcgggcttctgcttggaccatggttagccatgtcttgaacaattgagcaagttcagcaat  
agtacgtcaatcttttgatgacgatggcgttctgaacttctgaagagcagttctggcttaccagaacgggttagagcgcaaaaagcctg  
agcaaagacctgaccaccgttttctcgaatggcggttggaaagcttctctggtagcttgggttcgcaatttctagttgacggcgcgatcggtt  
gttcatattgtgcggtatgtcttcaatctgaagaagtgctgaattgtaccataaactcttttaacagcttccgtttgagttctcttagtagc  
tgtgtcattatcaggaggcagctgatgtttgtattccaaagatcggattgccaatgaaactggtttgaaacgacgggtatcggcagtatat  
ccttcaactgacgagtagtagcagcaatgttcgattctacttctgaagagattgctgatgacgatttctatttctccaacattatctcgat  
ttgtcgaatggcatctcgatgatcaatctcctcaagaatccccatgctaagtggaaatcatttccacccaaggagtaatcagttccttat  
tggattcattttcacaccaaataataactacttttgggtcttattagatgcccaggctctctagttgttggtgaaagtcaagttgttttaatacaga  
aggaacaaagcaaatcagttgtcattgcttaaggcatagtagccggcgccttaaatcgaatatccgtgccaccaccactatttattatcagttca  
ctatgattcggtaaagttttgggaagcataaggtatcgttaatagtttaagaacgtttctgttttggattcttaataaacaattgttctataagtc  
aataggttaattcaatttatttttacaattcctcaatacttaccactaaactctatattacctttgttaaaagatgtcaataaaaagaat  
gtaatgtcttcattgagaacgatctaattgtgtttgtcatcaagtttgcagtaatatagttcgataaagatgaataaatgatttcttttgtttg  
ttgatttctatacagtatatacgcgcaaaagcagtttgcgttcttcccaatatttcttattatagtgtaacagatgtagtaatctggatgaaca  
actctgccagaccgaaacgttttcgattgaggagatgttggatgtggataaaactggaattgatgatagaatgagagcttgctcgttcttacca  
aagacggtcaaaaagacatacggaaatctgtcttctgacgagatcgctatcaatgtttcatgacccatgaccacatccttcttctcatalcttt  
tgtaatctgaagttcatacaagtaaggcatggaagatcagcttcaactgtttctcaaaactcataaagccgaccaatttacgccgttcagact  
ataaaacaaatatacaaaagagaatccatgctcatctctcatttagcttcatcatccaactaaggacactgttttcgtaaaggtttgcatat  
tttctgaaccaaagcaaacatttcttcaatgtatattatcccgaagaaataatttcatacataatattattcatttcaaatatgcctcatcat  
taatttccatttagctttattttgctggtcatttctcaatgggttcagagtaaatgtaggtatggctagtgctgcttcttccctctcagatatca  
ttccaatatcttgattacaaaatcttttagtgaacatatccttcaagttgcttttcgagccataatcaattcacagggttgttgcacgtcagttg  
tagctcaagaagtaaggaggccaaactaacaagaatgtaatttctctatttcaatgcttcaataacgggtgaagtgaatccaaccgtaatat  
tctatcaacctcccactttataattctatcgtacaatccatgaaaagcaatacattgaaaaccattattcataacattattctaagcttaatgct  
aattttggaatctatcttcagaaaacctttcttctcactgtcataaggtgaacggcttctctgtctcctggaatgtaaccagaatctctgctttca  
gaaggattgatcttcaaatcatcgaatcttcatgccttctatgactagtcttggacgatgagaagaacggtagctccgtgaactgtgacgat  
ctgaatacgggctcatagggatcattctcatactgctgttacgatcagctggtagcctttctctcataagatgatccttctgttctctc  
gcgtaaatcttcgaggttctgctcggcgggttctggcctttcccaacatcacgatcagaccttcttggaaagtatgcttctcagctggatgca  
atgagcgtcaatcttttttagcctcggattccgaaacgtctttggctctagttgtattagcaattattgatcgttcaatgaacttaccggaag  
tttagagatttcttcttctcctgaatgaatttttaggtattccatagggattttgggaagctgataatatcaacatccacagttcttccgtaaat



tcagacgccttgctctccagaaacctgtaagattgagttgaacttttttaggatctagagctacttcattatgcgaatctgtgcttttcgatgcttcg  
acagcctcctctagcatgctatacacaatcaatcactacctcatcttcaaatctataagctcgattaaccgattagctatccaaggcttttagta  
cctcaatattcactttttcatatccacctttcatatgaagttagcttttatcttaaccttcgatggctcttaggtttaccatcttcaaccaaacg  
gcgactcatacctttgcttcaaaactaggtggaatttcgtgtcccgcataatctctgtcagcactagatatagcgtttctgctcagcagcaa  
ccccataaaaacagtttagtatcaactgcaagttcataactccatgccttataaaagccactcattttgcaacgatagtgatttctatgtatact  
ttctttacagaatagacttaagatgttttaagatgttttaataaacgaaaactgctgaaactcaaatggtaaaataatcgattttgaaaatgg  
cacacggctactttaagacacaaaactatttgttcaattaatgttccgaaggaggacacgccttcattaagcgaatacagattcacaactttta  
tattacaggttaaacttaatagacttaatacttacacatgtgaaatcgggtttctactaaataaacattttcgcttcaggtaccgtattataccacc  
ggaagtgcaaatccaatttaagtttcaaaagttatgatgactatttaaattttcttcttagagacaccaacagctttaccacgacgaccagt  
agtcttagtggttgaccacggacacgaaggtcaagagcgtgacgaagaccacgggtgagttggatcttctaagacgttcaaggtcttcacgga  
gcttactatcaacgtttgtgaaagcaattgggtgagactggccatcgacgacatcctttggcggttaaggaaccaagtagggattttgaattgagt  
agggtttgcaacgatggaacaagacgctccaactcttcagtggtaagctcaccagcgcgcttagacatgtctacatcagccttctgcagacgat  
gtggcgtaacgacgaccgacaccttaattgggtcatggcgtacatgacctatgcttgccatcaacattgggttgaagaagcggagaatgtg  
ttgaaactatacaaatagataaccctttcgtttattttactttactacgttctcggttgaacaagagacatgttgagataccggctaagcgcg  
gtgggttaaagtttgacagaaggatgtttgtgtgcaagttgactgttcttccgctaagaatagtagacttaacgtttgatttaacgatat  
ataacgaaccggatataatgataaaaagagaaaaagtaattgatatacattgaagatcgacttcaactgtgtgttttcagggttaac  
aatattatccggtttttacatttctattttctaaactttaatagcactcatcagatgcacaaggatgtgagcttttaaaatagctgccttatt  
gacctcaaaaatccaaaatttctataaaaattgcatttaaaacttattgggttaagattttattacagaactttttaaggattatatacaaaa  
ttattaagttagctaaactaaaggaagcagatacaactccaatacaaaagacatccgtccagtcaggcaagtagtcatcattaaacttgagcac  
atgcgcatactaggacgattttggccttcacaaaattagaaggatagtgccctatagcatcgagacctacaaagcaaaaatattggctcatcg  
atataactcatattgaaagaatgaattgatgcatagggcacttacttcacgaatatgatgtctgcgacatgtcagggtacctccggcaaaagac  
caagatatcacatttgcgtcaaaagatatgactgtccagatcaatccaggatagcaacagttaccgtaacattagcaattccattttctatcact  
tatcagagaaagacaaacgggtttgtactcaaaagttagattttcattaagagggatgcgatacagatccaaggaattgactgaaaggatatact  
gtatccaatcagaatccaatcatctatttctgtttgaacaacaggttctcggagactttactagccacatcatatacaagtttctcaaatcctgg  
ggcagaatcagcgggtggcaacatgcaagaaaactcatttgatgtgatattctcatatgttgatgaaaactcgtcgaggatgtaacgcgcat  
agaaaatttctgtcctctaaaacgtaagagctaatccagctattagatggacaacagaaaaccaagctttaggaacggggagaaacgcag  
acgttgaatccaagctgaaaagagaggggaagctaatatagacagagcaaacgcaatacaactaataatgatcagcaactttttcaattcca  
atacagaccagttagaggtacaaagatatcgagcattgtagtagtggcttcaaggccagcagttaaagaaccaattgatccgattacgtagctcaa  
cagatgaactgttttctgttcgcaaaaaccagtcattaataataaagcagatcatgaaagagctataatagtaaaaaggtaagcagagt  
gcaaggtactaaagttatcaagaatatagtaagaccgtggctttaaagttgatactctgattttttattatccaagagggaaaagataatgg  
aagcaataataacaggcaagtaataaataaggccaactctcattacggaaccaactcattctctgtctaagacattgccgaatacgaacgc  
ccaatgttagggaaaagaaaagcgaacaatgtgaaaagctgaaacaagaagggtacaattatggactcagaaccttaattgagagat  
aaattccaaccaccaacagcaggttcaagatcctggcagtgacatctgaatacatgaagaaaatcggttcaagattgaaaaataaacggt  
gttagattcaccatattttcatgtcagcctcaggagacgttaagtaacgaagaatagccataatattctcgcaaaattgctgggcagtagccggg  
agtgatatacggggcgaggtctttctctgatgatacagataactgtttggacaacggccatccagtcagtaaggtttccatattgaacgaat  
tggcgaagtcctgatcactatgataatgctgtacggaaaacatcatcagctaaaaccgtgcaaaaaggacaggtacatgagagatgcttt  
aatcatttcattactgtagcttgaacaagatttcagcaccagtggttcacaagcttcgagatttacgacgattttacgggtatccttaagctac  
tttgagtataaacagatgagaagcatcctgcaaggattctcagcatcattgaagagaaaaatttgaaatgggttaaaggaataggttgagag  
gaaagaacacgcaaatttctagaagaatcccacggctagagcatcatcggttagcgcgggactaggcagagtagaatcaactgagcattg  
atcaaaatagcttctcttgcaagcatcagttcattactgagacgaacagcagatattctcaaacgtgatacttttaattacatatttattcata  
aagtcgaaaagatgagcaccatcgccagattcgtaaaaaacctcaatttcattcgtatttcgaataaggactattctgtaagttctttgggtggct  
aagacctcgtcataatgtattgacgagcgcggcttgttcaattgtaccaaggattcgatagcctatgtttcggaagctccttgacatgtctcat  
aaccgcccttcagaaaattgtgaggtaccatcaggtttgtaaagactgtcagctggggttaagcaaggaattatggaagtagacacgacactgca  
ccatgagtatacaactatagacaggaagaggtgtgaaattcattttcttaagattgactacaacgggatgacgatgtcataataagtgagg  
gaaatagtaagcgaagagaattttcaataaaaaagtaagaatcaagtagtaagtcagtgatcagtggttataagaagaaaagaaaaaaa  
aaatgctctataaaaataaagaagcgttccaaagaaccttggtatagttcagctgcaataataagccttcgggttttaattcaagatttagcga  
tgacaaaattcgaaaagaaagattagagaatttagaataaaagatcaacaaatagatttgaaactaagctgtgtactgttatcgacagaaa  
gatcaaacgggaagtgtagaaaactgacgaatcaatgcaaaattgtcttttaacaaaaaaacaaacaaaagagcagaagaaaaccaatgg

aagatcagaggcttctaataatcctcgaacatcggttgctggtgtttcaagtataggaagttatgagtggttcggatcagacatgagatatga  
cgagtatggccagaggtgagaacaagtagcaaattggctaaagtcctaacgtttaagtttaagtaaccgcaaaaaaagaagagcatggtt  
tgaaatcttccctggtggaattcgtagagttatcctcagtttagtaacttggtatggattacgcttgaagaaaagacagaaggaccagg  
gttgatattgaaattgactttatataaggaacaaaaaacaaccactgttttatattcaaggttacagtagaagagtgatcagatagatgaaga  
gtcagaacgttactgttacgtcttgtcattttagtggaacgacataaaaaataagaactagggaaattgaaattgggattcgatacttaataa  
cctgagacatttgaacctcagatgcttgccttgcgaacgatgaagaaaaaggagcacatcatgatcgataaagtagatagataaaatga  
aattttttatcattaaaaatcttttaggttgccttattcattgtactatcatcaattttgctttccctctaaccgtaagttattactaacgtgcg  
tttcgctattttaccaataaagatagtaaaccttagtacgtagaacgataagttgctttacttttgatgcaaaaagaaaatgctctccttct  
tcaccttgccttcacctaaggaaaagacaaaccaacatgtcagccattggatccttgggttttgcctgtaatgcggaatcttttagaaagta  
ctacggcacaatggaccacatgtgatcaatgtcaatctgcttccatctcgaattgcaaatggctgttgaacgaaaagtggaaccaatgc  
tttctctgctctgaaatgaaacatagatgttccaagtggaacacaaaaggaggagctgcgacggatggagttttatgtaattcatctt  
gattgacttaaggcacaacgaacatttgcagtctcagtggaattaatgatttctttatgatttcttaatttctaactaatttcgcttag  
attgacgaaaagtgtcctaaggtgtgtaacgatcagatgactttccataccttgcaattacgaagtccgatgaagttccactgctttatgat  
gtcctagggtgtggttacaattcagcacgaataatgaaagaaaaagcagggtgtcctaattgggtctcatgtccggttctttctctccttac  
gaaagtgaaaaataaaaagcggagaaataggtatatttctcattttgggtatttttggttggttcatcggttaagcttgaatttgccttctt  
tttttttggattaggttcttctccatatttaaacctggagacgaccattacccttgaacagacggtacattaactatagtttcttgaactata  
taactatctgcatactatctagaagctttccatcggttacagtcttacttcttcttttagtggtcctagacatgcatttcataaaaaacata  
catagaataaaaggaatgataaatggctttatgtatctgggatgtctgattacgttattttatactacacctagacgatttcgttttgtagtact  
atgttatgtattgtcaaaaatgattttataaaaacttgattctgaaaacttttattatggaaaaggaatgtgtcataaatgaaagcgactctta  
atttgcatattgtttatcactatgtatggataaattcattatattataatcgatgtaagctaggggtatcttttagatctaataaacatagca  
attcgatggtcagaaaaagaccattctttatgtttggtttggtacataaacaataaaaatgaaattcactttcaacatccctgataataaaaatctc  
gtatgaattcatctgcctagtgaacaatagaaaaagtgaatataatagggtgtcgaatggttcaataccattgcttgctttaaaaagaaaa  
tcaaagcagcttgactatcgaaattctttttttttattattatcactatttacagtacgaaaaggatttgggtatcataaatagaaaaccatttg  
ttaacatataagaatgaaccaattgcttaaatctataaagataaaaagcgggtcactaggatacgctatcctgacaaggaaggagccaagc  
atgagttgagaggaaattgacgatctgtattcaataaagtaaaaatggcttctgtaaagtcattaaaaggaaatattgaaactgagaaaatctt  
ttgatgttgccttcaagaaaccgatgaaatgaaacagaaaatagcagacatctcgaagtttatcgacggattttagtggaataacgtatgttt  
ttatgctatttgcagaatgaaagaaatagtgaaataagatagctgaaataatccttactaacgctgctttagtctatttggctgattttttggat  
atgaatgaaacaatttgccacacctctgtagtctcctggatccatcgcgaagcaacgactgttctcctcatggtgatttttagaagaca  
catcagttgcttatagtttagaaaagcctattgccagtacccacaagtggttatctggctaacagcccactccaagtcaataatccgctctgtc  
agctggaagctcaattcttctcaaacccagcttaaatcttaaccaatcttctcctgatcaacctctcgccattaatcctagctcttatg  
gaaacaaaagcggaaaagagctacagactcgccctcagagcgtgctttaggaaaagatcatctatgaagcttaaggttgatagcagacttc  
tgcaatcattttttatattgcatacattatctgttcgacatttcttccgatactattattatgattagaacacgggtgtgtaggcataagttta  
tatgtattttcagaagaatttagcaagagactgcgtactttatccacctctctatgtgtcgtttttattatggtaataaaaggagataaagccat  
ggggagcttcggctgaaatcttctgcgctgacattatcattatcattatcattacttattcttattatcttcttctgagtaaaaactttgga  
cttttaacctttcattttactgtacgaaacctatttaacatcgtctccatccattctcctcaaaggagaataccaaaatctctttaaat  
ggacagttcagacagttcggatgaaatgggatcattattatgtacaggatacattattggctacgggtctttaaatacatttcagtctactgc  
tccatcttgcctagcaagaatcaaatcaataaaaaattaaacacctttctcattgaacaagctttcgtcgacaaaagggttaacgagataatt  
aatgaagccaattagtagtaaaaaaggaaagcaaatcataactgaaaaaaaggaaaaaagaccagatggataactttaatgctgaatta  
cgacttgcaaacgttcaggggtcggacttattcggagcctttcagcagcaagcttctatagaattcctcagctgcttaaatgcaggctgt  
ggtaacataaccaccaggccaagccaccaacggtaacctaaccagaatctgtagagaatcaatgattctgtcgtcgtcaaacgtagaattc  
ccgattttaccaacaagtcgtgctttttgttctaacaagatcaaaacatacctttgaaaagtccagtaatagggtccaacagccatagtgaaaa  
aaaaacacaaaactaagcttgaaattgaattgaaagagaaggggaagtggtaagttccttttagctggtatacattgtctccgactg  
ggagacatagtgactcgaaggtctcgtatacccaatggaaaaacaaaacaaatcgcacaggtattgcttaatccttgaaaaatttgcctg  
gtatcctatttatcggttttcaagaaactgttaccatatgcttctaattcttccctccttgcagaaactcttagctcttttgattcttacggctac  
ataatctcaaatcaaaaagatgactgtatagaataaactagcaaaaatttcccgatggaaatgattcaactcaacttttagtatgtttgttact  
acattaagctgctgtgcaactgacataacacgggtggcgcaggttaaaaagttaaaaagttagctcaaggttgcattttgcaaaaactgaattg  
agagaccattcaacgcaattcaatataatgaacctgtttcttttcttcttcttttcttttcttttcttttcttttcttttcttttctttt  
gtcgatatatgagattgtaacggaaagccaatcagtttaagacgcgtacctaggaaagcgacatacatcaaaagtacgagacagcaaatgag

cttctcatcaagtattctttctgtaaggatagagtgttcggtctaaaacgagactcgtgtaagtatctgcattcatcgttggttacattttgacgt  
attaacgatatctttatcttttagttatacaacatggaagctattctatacagattctacagcagaatgggtttgacggaataacgaaagctgct  
gaacgaatgttttggatgcaatcgataaacgtatgagaaaaatcacaattcattaacatagctaactggttcttcagatcttaagactttattca  
cgaattagcaatccatacacaacatcggaacataatgaaccactactgaagacgttgacattggttcaacttgagcaataacctgtgtcag  
gtcttcgaaaagattacaacagtatacaagcctttatctaaggactcatcaaaaattggaagaagaattcacaagtcggctgatataccg  
gatcgatttaaatcatcttggattctagcatgatctcactgtcgggtcttggctgttctcaaacctcctaattatgtagcaagtcattgc  
cgcttttctgcttctcactatttagctagccccgtgaccagtgagaccacgtctcctagacgggagcttgctacgaaagaatc  
ccgttggctgaaaatgctttacgaaagatcttagatgccaatcaacctcaggtatgaattcacctcgacaagccgtttacgaaggcatgcca  
agatttgagttggatagcaaatcatttcacattgtaaatgggaatcacagaaatggaatgctccaagataaatgctcctaatacaaccttagt  
ctaattatccattcaatgatcgcacttctctagatgaccgcaatcctgtgtttatgtagaattttccaagaaggagactcggattacaagtt  
gattttcttaacatacttcgaaaaaacgatgaccgttaagcaaaccttggctatcattttctactttctcgacatgtactgtttcatgca  
ttgtattgaagctactgggtgttctctgtgattcgcctgtttgtctcaagagaagacaccattccattgttgataaattgcatgaagctt  
atcctaaaacattaactttatcgtagcatatttttgaatgaatgtttctttatgttccatatacagagttgctgtccgagctgtagcaca  
actgattaacggtttctgctttcatacatcaatcaaacgaagtggtagcgtaggttaaggtttctgagaacgtaagtccttgctcgagaat  
attacctgaatgtatataaagtatgatatacttaataactttaagataatgtttgctatttactctgccgttcctcactctagaatactgtctgc  
gtctatgacattactgtgtgctgactgtctcgagttcggatctgcaagaagattcgctcgaaacatgtaatacaacagaatgtgaaaaca  
aatacaatattcatggaaaatcaacagtcgacacaacctgccaggttaagaagcttaggggtacacattctaattgaagtgtagtaagaaca  
acatcaagaaccagcaatgagaatagatgcaaagaacacaaaaacagagaaggtaggattctcagattatcgattgggtctatttagaa  
aaccctcaagccgaaaagctccgagacgattacttctcatcaaatgaaatgagtcgctcacaagaagcagtgccaatggcaacttcaa  
caccgacgtcgtcagagaaacgaccaataaattccctacgtccagtagctattcgaaaaaaagacaaaagtagaaggagagcaaggaaaag  
cctgaagacgaaaagaaaagcttacagcaatcagtggtactggagaaccaacggcagctttacctctaccaagggtgaccgacaggtcac  
cagtaataccaggtccacgcccgtggcctattcgagctcagcgtatggagcgcctcagagttacgatggcgtcagtaaatatcttatgctattc  
ccagattcctgttcgtaattgtatcccccaattgatatcgacaattcgcctcagatctttttagagacatgcttatcgtctggaatgaacc  
tggtgctcagttcgtctatactccatggtttgagttgcccgttactgtacaatgcaattggcaaatatccgaatagaaatgatgtaaatggtg  
atgctgcaatcaatccgctcttagtaaacgagaaaatagggggacagatgtatatacagatgactcggatagttaccattttggcacattg  
gttattttctcttcaaaccttaacgaagattgctgttagacttatttactgcccacttaataggttacaaggaaccaggaaaaaccaa  
attgaaagcagaagctggacttctcgacaagatgggtgtgagttaaaagtaaaaaaccacgaatggaatctcccgaacctacggttttgaac  
tgctatgacataatgatcattagaacaacgattacaagcagcactgagctatcacgctcctctgttttcaagatctaatacaagaatgtactgatt  
acctgaaaaaaagttcatgtattttagaagaacaacgtgcaagatgactaaaagcaagtatagcaaaatcatggtatataaggaacattgtt  
acaagctctgttatactgaaagcatgataaaagtctgacttgattcaaacctgatttataataagaactcaacttttattcattctttttt  
gtgaatctttctataatctcaaacgttcgatattaccattcgtgtttgtgccatatttggtaaaaggaaagtttaaacagttagagatttaacag  
ttcagcttcatttaacggaaacttatgggaaaaacaacaattgatgaacaatgtaaaccaacagataaacgtaaaagcagctgattccc  
cgaccgctattactccacgtgatacttcaagcgtaaatctgggtgaagcactacggagaagtaaattgcaaaaaataaattgggtgtttcc  
cctcttctgaagtaaggtgtatccgttgccttttgttttctattcccacttattgttttccgaaacctacctaactcgtgggtggcagactc  
agatcgccggggcaaacgttttttaccatttattggactgtgaggaaagggaaagagcaagtttactgtgtctgactgtgctgattcga  
ttcgttgcaattttggggaccattttggttctagttggcgataaacggctcaaaagttcaagctgatttttggaaaaggtttgtgtccgc  
aaactgattcaccagcctagtttctactttttatagctagaaggatcagtgaaatattcggaccgaacaggagacactgaattaactctcag  
catttaaccgctcgttttgagtaatcgtactttctggtatataaactgtgaacgtaataaagaagccatcatgtttctttataacgtatctcgt  
ttcttttctataatcttataaacctgatttctgtattcgtctcgtgtgtgtgtatctcctttctagtcgtaaaaaatcgagttttttgtc  
tacgtgcctgtcctgaccggtcgtgtttattcattgtcaaaaaaggataatcgattctttatcctgaaaaataactctatagttgtaactcgtc  
agtctcagctgcttttaattgttcattggaatcccttaacgcaagttcaattttgggttttatttttactttataataaagaataaaaaatcaag  
tacttcagcttgcatattaattttcttttctgtgacttactctatctgtacctttctgcatactttcgcgatgacaggggtactaagcatcttat  
tgattgcaaaccttcaactttgccaatctaaagttctacatcagaacatcactcagtaacattttgtatagagcgttctcatgagcaatcttct  
gaaagctcctcatatgaaggacgcgttaaatccgctcttaccagtcgagttggtaaggaaaaccttaggaagccttgccgatatgggaaatc  
tccacctcgtgatattgtaaaaatcagctgcttaacctcctaagaatctaacgtttcgatggtaaatcaaaaggtgaaaattccaacttacta  
cgtaaaccttaggacattgaaacagagaacaacagatgctaagcagccccctaaaattagttttgcttaggaaatttaacaatggaagcaa  
tcaaaatcgtcagctcccgtcgtccgctccaagcaaatgcaactactgtcgcgatgtattggaagatgtgtgaaaaggataatgactt  
aaagttagagcttctgatgaagaagaggatgacagcaggtttgcttatctgtgaaattcaaaaagatgctagcaataataggtaaaggtaaaa

tgtatcgacctattagatctcctaaccgcccccaaaaaagctaaacgtttcttcttccgaagaagatgatgatgacgatgaatcgccgatgaag  
aggctaatacgatagtaacgatgaaaatgacggggcagtttctgattcttcttccgatgatatcgaagaggccgatcacctttacagtttcc  
ttcaaccccgatacagactgtctcctccatctgaaaatccagatgatactgatttggccgggtactttgatgaggatcaacccgcct  
gtctagcattgtctccttagctaaccactcccctaagcattttctaaggttctcaggacattgatcctacctttccagattctgattccgacga  
tgaatctgtggaagagaaatcaaccagagcacaacgatcatctgctaaggctaaatggaatcctaagcacagcagtaacaatttagaaaagaa  
atcttcatcaggaatgtcaaaaaatagcagatctccccctgtaataataatcgaaggccatcgatggcttcatgagttgacgaggtctacctatt  
gctgtatattaataaaaaagaaaactggaaaatgctctacaacattgtatagtgttcgatgtaaatctgtttcattccgttatcgaatcactcgt  
tatgttctaatacactgttgaatagagtctggttatttttgtataattgttattgttaagcaataagaaaactatagctagtgaagga  
aagatgtagttgctatcttcgattaattccggttagagatctcaatggcctcaattattaataagggagctacctccagattccttttaattgtt  
cataaataagactgacgggtcactgttaatgagactgtacgacaattcaatacagatcttctattttcaactgtaagggctaggcaatgtg  
gttcccgacagatcccaagagacaatacagaatcatcaagcgttcttccgtttaaaggaggattggatgagcgaatgataaactgca  
ctgccagataactgaccgggtaactaaaacgattagcagtcttctacaacattaatgttcacgtacattatagaagaatggcaagaaaatc  
gacgacattttcaactggtcctttccagaaaatagctgagtttccgcaaacactgtccttgacgaagacaatcctaataaagcatcataggc  
attctctacaggatctgaaataagtctagaattccggatgaagccaaagaatcagaacggctgacgatacagatattgttatctttctggaagt  
tttctaaaaggtgagaagctcgaactaaatcattgtataacttaccattcttcttctgttcatttagtcatattgattaaattgaccaagaaa  
gactagctcgcagcattgagacgaggttttccaggaatgctctgtaggttctcagtagttgtaggagaagctacaagctgacctttcacag  
gttagcctcaacttagaaaaatcaagctttcaagctttgtatagcttctgtacggagcctgggtgcatccttttgattccaccaataaaagata  
aaacatcaccttaagtaatcgaccacgaggaccgtgacgggataactgaaggatcctggatcttgtaaatgcaacaagtagcaactga  
aggagcaaaagggtgcttgggaggaagatgaatcagatgactagatgttgcagaagactgggctccgttggtgtctcaagtttccggact  
ttcagtagtactcgaagcatcaggaagattaatttagataatcatctccttctcagcgaataatggctattctttacctacgggaatttgggtacc  
ggaattaataataatttctgaagaccatcgtctgtcctcaacgtccattgtacgttctatacgtaaaaatgagtattagccattgtcaa  
gaaactatacataccagttctaccttaataatcacatcaccagccttatacgaatcccctaatacattgtaagtaataactcatcttatgttcacttg  
tatccataccttcttcagactccatttgaatatttcttctcattgtaggtgacaatgcaggcatgcataagttgctaataagcatttgagaaa  
gctgtattatgaaaaactatagttgagtaagtaagcgaattcattgtccagtcattctcgatcatacattttccatgtctacactgccacaagacct  
gccttttagcaattgaaaaacactcgtcttagcattatattgcttcaaaatcaggttaattcacgtaacaagcgaccctttaaatttggtaag  
gctgaggctgctagttgcaagttgggtgatcaagcaagcaagaatttaggtgaagacctggcagttagtagtttcttgaatatcggt  
aatgtaattttaattaagcgaccacttattcgttaaaaacaaaactcggcaatgttgaataatggttatgtttctgaatatgattttcttgca  
agaaaaggcaaaactttaaaaatgaaatggacaagccagaactcgaatctgggaccttccatgctaaggaagcgtgataaacatctacac  
cacatgcccaataaataagcatattgttagtatgttacctactccctgttattatattttgagttttggcatgaaatttaggttagcattcagctt  
taaagcatatttgaataactataatgtacgcatatgcttatttaacaatagtataaccattttcgttcatatggggatttatttttagatattct  
acatttattacctaattagtttgggttgcataagtttggaattaggaatattagtaactaaaccgaagataaaatcgctataaacataagattta  
acggataatcgaatttctgtctcatataggaatttatacagtggaagggcggttcgcaatagtgagatagaagagtatgaattaatgacagc  
agacttgcataattgtcaataaccagttgaattacattgaatttttctacaagttcatgaaacttttgaagggtcacagtaaaccaaaat  
catgttacttaaatagtttcaagtaaatggtataactcggcttcttttggttaatgcatcgattgtacagacttagcaatcagttacattatggatt  
caactgtacgagagtataccctcatgtcgggaagattacatctagcaatcgagacatctgtgatgatacttctgtggcctgtaagcaactatt  
ctgtgagcccagggtgaaattgagcctaacggaaacagtgccagaaaactcgagcagcttaccacaacattgtttgtcctaactcatcgaa  
cactttcaaaatagaaatgtatgggggaatacatccatcaattgttatacaagaacatcaaaagaacctggcaagagttgtttacgaaactata  
aaacagtctcaatcgtaggtgttttaactatgatctataactgtaaccctggctcctggaatgctaggtccttagctattggcttgaatttggc  
aagggttagctgttggcctaataagcccttttagcgatacatcacatggtatgatttaataaaccttctcaagaagatgctaattcattatta  
tcattagcaagcatgcgttaacagtgagttggagtctcaaatcccatttccgttcttcaattctagatctggggccataactatattaattt  
atccagatcggttgtgctcatgaaatctggcatcgacaactgacatagctgttgggtgattacctggataaatgtgccaaatatttagaaattcctt  
ggaataatcaaatgccagctgcagcttgaaaaattgctgctcccactctcgatgattgaaatgtagattgtaatccaccgaacccatgagca  
ctgggtgaaaaggcacaataatcctaattttcttctcgggattagaatcttatgctcgaagacttattacctcaaagtcatggagttttcagaaaa  
aagatcttggcttataagctcaggaagctccttaagcatatttccagaagattactaaagccattgagctactgatctatcggtatgctggtt  
tctagtttagtgaggcgttctagaaaactcgttctgaagaaaatgctggaagaattgcttatttcaactcatagtagaggcctaattctgaa  
acaaaactgtttacccttcttggaaactttagtgacaatgctgctatggttcttatacgggaatacgaatgttgaagaaggattcaaatctc  
gcttgaagtagaacccatcagaaaatggcctataaattcaatattaatgtaaacggctggatacgcgataatgcaattatattattaataaca  
aagcctaataactgtaggggtcaaacatgccaataagatacaataaatcgaagtgcagaaaaacatccttttatcaataatggcatatctttc

gtaaacgcacatttattatggcgttttcttcgtaagcattccttgactagtttcttataaaaaacctgagtattgtagtagcatagtggttgc  
gcaatatactgaaattgctctagagatatccgaaactcctttgatttctatgtttataaagcaagagcgcaaaaaatcacttattactgtag  
ccttcatcatcttcatgattccttcataacagcaaaataagaattaaggattctgataatcaacaattgatccgtctgtagtcccttcctcatt  
agatcatataattgaaagctgaatacttctggagcctctcggctaacaatcattgtttcaataccaatacaagctttcaaagtttaacggaa  
cgtaagatccaaacttttattcaaccagttataatcttttaaatagcttctgtaacttcttgataatggatggccttttgaagaaaattgccc  
tggaatcgactttttataagctttcaaagcattgtaatacttctgttccaatatgcgacctgacatagatgatcttcaccgataccatcgat  
aaaagcatcgtaaagatactccaagctgtgtttgataaattcgtttgtgatatagaccacgaagatgagcgcttttagtaaaaagtttaaga  
agtgagaaccgtttctgaaattctgttcttttgtaataataactattggtaataaagcmetaaattcaaaaagcaatggcctgaagctgtgaa  
aatgtacatgagattggttctattagtagtctcaatctgtctgtaaatattcggagttatattagcaaaagcaatctgaaaaactttcataatt  
gatgcatcatcagcggcatttagaattcctgagcattaatcttaaacagagcaagagctgttgaataaaaacgcaaggtccgttctgtatgaaa  
taatcgaggattcgattgcataatccaatcgtaaatccttgataaaaagtgaaaaaaccagtttattgtaataagttcaagtccatcttcatt  
cagatatttttgataaagatgaggaagagctgttgaagacgtaactcaagacagtcagatcaagtaaaagaccgtgaatcaattaccatag  
tatccaggaatgtacagctcagagagctgagagacaagaaataagcctgttctcggtaacagtaaacgtaaggtgcaacaacgatatta  
tagcctgacagtagcccatgtcactgtttactccagaataaaatctcaatacttctcagagcatctatccctgacttgattgataagcaggata  
agacggtaagcttctgataaatctctcaatctcatcgtataactcaagttctgcaagtaacttattgtacattattgtaataaaaaccctcga  
tttccaccgcaataataagcttcagaacatgtttccatagtcgcccctcaaattgtcggtaaacgcttttgaattagcttaataaggaagga  
gtttgtacaaaataaaattggctccgtttcaagaaaatacttttccactgatctatttctcctttctgcccttctgaattaaattctgggtctatt  
agtttagagggaaagccaaattgcatcccaagcctgtagaattatcatgatctgaagttgcttgattctcattattttttatggataaccct  
gaatgcagaagctttccgatgcaaaagcatgtaagaattctgtaacatcaccagcctcatgcaagtaaatgctgattatgataagcgatca  
caaaagagttcggattgtgacgtgtaccgtttatagtaagatgaatagttgattgtaacggttattaatcaaaaacaaacacgttggtgtctg  
aagctgttcttctactgtcttatagtcgacagaggaaacgtaaatcgagctttaaatacctaactggaagcaaaaggaagaggtacttatgt  
agatgcttcaaaaattagcaaatcattatatttaattcaagacgaccaatgataatttcttctgcttctgcaaacgaaagaaaacagttgg  
tgtagtattccttcataagcttctgatttttccaggaaaaacatgcttcaataaattcattgattaatcattctggacctttaccaataaaaggc  
tccagaaacttttcttaattaaagctgtttgttgttcaaaaagtcggatgaatgaagttgttggcgggtaacaacatcacactgtgcccgtt  
aggttcaacagtaaatgcaaaatactagctctgtattccaatatacagatcaattaccaatcatagctattctatttattagtaatgctgtgta  
ttgaggaagtaagaatacagtgtaataaaaaaaagcattataattcaataactcatagaacattatcatcgaactcattctagccagttcatg  
gcaaatgaagctttttgaacattaataagagtggttggtaaacatttgtgtgacaaagcaaatcattaagagcaatcgatgttgcaaaaatt  
gctcaattggcttccaggtgataaccgctgaaccctttatagttagtaagcaaaatacagtaaaaaagacaaaacgtaacttagaagcaatt  
cgttgatacactggctataacttctggaagtcattttcaaaaagaaagataaaggactcgaagatggattatagtaagcgagaagttccata  
cttaacttgatcatttttttagatcatgactttcagcttttatactcatcaaaaattgttgggaataactcatgactgggtccaaaatttcatct  
cttctgttctgagattacgccggagaaagacgctgagtagcagcgaattgttgcataattcgcaattgaagaaattgcaaaaatcgagagag  
aaagggataggtcttgcaatctgaattgcttggggatattgtaaagtaattcctgtaccgagaggcaagttcccattacacaacaattgat  
tgatccataaaaggtagtaaggatgtgtaaaaggcataaacatacttttccgattgtacatctgagtgagtagccttttccggacagaactct  
tgtgccgtttcatagccatgattaatgaggaaggaagagataaggtctttaaaggaaattttctgcttcttctcatcaactgaagctatatt  
cagagaatcgctcaacaatttttcttcttcttgaacggcgtggctctatctcataaagaatgctgttgaccaaaattgcccctgatgttccacc  
ttggcttttagtctatcgtcgggtacaaagaatcgctcacgttctgtaaggctaccctaaatgctccatttttgtgtagaatattgtttgtg  
ataaggttcacaccatcccacaacatcaccagttgaaattgaggtccatctgcttccggtttctgatccatggtaaattcaccattgtgtcc  
atgataaccccaactttctgatgtttctggtaaacgtcctgtttgtgattcttttaaaaaaccaacatattctacttcttaccacatgac  
aatactggatttcaaaatagtagactgaacagttatttggataggaaaatctgatcgattaaagccgcatcatgttcgcttccgctatccgggc  
ctttataatgcaaaatagcaagttctactaacatttaacttaccaaaaaagaagcctcaagttgcttgcagacctataaaatcggatt  
tttcttctgtcctcacgtttgaggtaaaggattgacattactgcctgtatattcagtagtattcggtatcttcaagtagttccattgtag  
ccattgaggtctttagtcagcaattttcaccgtaatttgtccatgaatattcaggcaattcattataggaatctagcgttttctttagatttcta  
acgtttttgtcatggcgttgttctggtacgtaagtagccggaggtaataaataagatgaatgaaggagtaatacaagttgacaatgtagct  
agcaaaaatacaaaactttacgatgttttggatattataagaatataaaataaattaccgtttgtatgtttgggttcttctaatgtgctacaag  
tttctgaaactatagcggtaaatgaggtttacagtactaacttacaatccataagtagacttacaatttcttttagtaataatagca  
aggcatactatgaaattctcaccatctaagcactattgagtataagattctgtttgatacaaaatagatcaagatattctgattttaaacaac  
agccaacgaaaatacagaggaatcagaaggtcggaggacaataagtagctataaattgctaaaggcttttaagatttaaatcattata  
aagcaacgtagattaacgaaagctcagttttaccctcaaaagaatccgaaatgttttgaagaggatccaagtttagtataatgaacagggga



nnnnnnnnnnnaagaaacccaaaaaaacagaagcgcgatttttcgcctagttgctactagcgcgatgaaaatgcatagagaaagg







gttcaagtttatctttccagccccacttggattttgtgttcaactcatatcttgaaggtatatggaaatcgtaacagcagccgcaaatagaat  
aaagctcttgatcttatacatttaagcattctgtacagttctcagataccatacgtattcagtaagcgtcgatatggtagacagagtaactgatt  
ccgctcattcatgagctccaagtttcaagtgaatttcaacacattcctcagagaatcttaattccaagatgaagaagatccgacactcttt  
tagtaaagatacctgtccatggctctcaaggtgcgaacaaaaggctcatacctaattcctatagaggaaaattacagcataccctgatttac  
aaaagtactcagcagatgcagccccggttcccgcactaaaattgtctatataccgaacatgttctttccagaggaactaaagttcctccgct  
ggtgactaaaacgatgtttctatccttaggctgcaaatcaatgaatttataaccttattttccacatcgactaaagtagaagggccggtattctca  
ataaaaaatcgatcgctctccaccttcatactgtctgatgcttgctgattaccgtttctttccctttttatgtatataaacgtaataactcttt  
atattatataaaaaatccaataagtttgatatttactttcaatgactttatataatgcttctcaagctcaacatcaagttcaattcgataacgcacca  
ttttcacaatttactgccaacatctaattgacttgaagctccagagcctagatacgcgtccaaccttacataagggtaattcaatcatcttttgt  
tataatcattagctcaactgtataacaacaatttcccaaaatttttgtagtctccgtaaagataattgattatgggcaataaatcagctattcaaga  
agaatttgagatacgtacaatatcaagagaaggtgaaaagaattgccaaaaggaaatcgaagatttgtcaatgcgcaacaaaccgaac  
tattagtgtgattggaaatgtcgccagcaaagtcatgtatgagagattgtcttaaaaacgctacgtcttatgtttacctagaactgaatttaac  
atgataaaaaatagaatcgaccaaactgcaatggggattacgcagccatcaagatgaagaaaagcagaagcattcaaaaaccaaacg  
agaagtagataaaataagttgctaccaactcaacaaattccgctaaagaattttactgtttgctggaaagaccttactgttactaaagtcaataa  
gctctcctgtaaaattttaataatagcaatattacattctatttttacacatatgttctcaagctatcgttgattattgttttatatcgggctaaag  
aagctaaaagggttaacaattgataattcgaactcaaaactcagcgggtctttgtattataagttcattaataaacctttcaattgctga  
ccggtggaatgaataaggcatctactactcatgaattcgtcattgaaatctcgtatagttcaaaaacgttcaaacgcacaaaagcgacaatc  
tctgctaggatagcaagtcaagttatgactccagcaaacaggtttcctcaaatcgcggtcgcaaaaaccgcatgttacctaactgattgat  
cgtatcaaaaatggcacctgtttgttgaatagatcctcaatacattcctgttatacgcgtatataatcctataatctttatgaatcgga  
attcctatctcaaaaaacaggttactaaagcctgtgagagcgctgttttctgtggctgaagggcgcaatccgtgttgaagaatcaaaa  
ggtgcaattgtgtgattgaaaccaagattgaaatgtcattggaattcacacctgcgaaacaaaactgaaatgcatcttgggaatccctttctg  
gagttgcttggcgtgaagcttcataatagaatctcgcagtagctgtagcctcaaaaacatgttctgtttggcgagataatttttgaaataat  
aaactcgttttagctaaaaagctattaggaggggagatgtttctggatctttgggggagttatagtttatacttgaatcattaagggtaactc  
ctttgccttctcgggttcttggataaaacagaggcattatgtaaactcttataggggtaatccgattgcttgaattgtagaactcaatct  
ggctcggagcctaaacgcagctgtgtacaactttcagcatgattccctcagttcgtactcactcaaaattcaaggtttacgcttttaaaagt  
atattagatagtagtcaaatagcttaacgattaactttttccgaaagggcgaaacaggaaatcgaagtataaggttggtaatgcaggctcc  
attaatgtaacatttgacatgctcccaccattttgaaactttgcattaccaaaaggttaacaaaataacgggtgtatattacttttaataacagaat  
taatttcaagaggtgttctgtatattctaaaattaaccgtaatctgttataatcattactttgcatactttcgggtaattgaataaatcagtgtaa  
tattacataaataaggagaaaagattaaacttgggtcatccaactcaaatccattagagataaatgctgagtaaacattctccgccgtaa  
tagctttgtaaaagctatgcaatatgtggcctttatacattcaaaaaaggaaacagtgcataagggtaatagttattgtccacatcgaaag  
ccaattatcagctatacaaaacttcaaaaacttattaaatactgcgcaggtcaattaaagtgatcttgaagctctgatactttatgatacagca  
atggtagactttcactaagccagttattatcgtcaaaaagtcttctttatctgatcctaggggtatacgttgatgacgctctcataatgattctt  
ttttacgaaagtctttcattactgtttaccatccaatcgatagatcctgtctcattcacgctactataacattcaaacgcattaccaatct  
tgctagcaatatcaaatgtcctttcactaccgtaactcgaacatcaaacattgctttccattgtcagctaatcatcttcaataaaaattagctcgtt  
gtaccataagttagtagcagcttcaaaaatcttctcgcaggtatagatctcgaatttctcaaaatgacgctttcgatcaaaaagcgtaccttgat  
attcgtgataataagccaatcataaggagaaacaactggaaaactttctcagttttacttctcgattttatccaatctcctgcaaacgaaacttg  
cattaattcacctggctctttaccaccgtttctagagcatccttggtaaaaaaccataaattgggctatctttataataaattgaaatgaaattct  
ttcaaaaggtcatctcaggagcgcaaatcctaattctgtctgcaaatatcaacctcaaatgatttcaagatagcacctttgagctttaattttc  
caaaaaccataactaaattcttctattttcggatccatgttctttttacagcttttatcctttgggtctatatgagcttgagttggatgcaactgtgctt  
gtgattataatacatgaaactctgtacagttctaacaaggtatattcaattaccaatattaaaatgtatttatacatataatctaatagttttcaata  
aaattaaaatattttcaataagtaagacaaaacagtagaccaactgtattattgaacaagattaaaactcaaaataatgaacaagcttaa  
caaacctttaagccaaggtgtttaggtcctttccaatatcaaacgctgtattcagcagctgaagccattttgtacagctcttctcagattcc  
aagtaaaacttaatacgaacacctttatcggatatttagttgattcccctcgtcattcctaagtttaataaatctttgcacaatctctatagataaa  
ttatttgatctctcacagcctcaagctataaagcaaatcccacctctgtctgtataaaaactaatcttcttggaaatgcaaacagcaaacgctc  
tgcaaacagatgtacttccaattgtaaacataaccctctttgaaacatagctctgccgaacatgtcggaggcttgattagcttgattaaagta  
ataggcatttcagattctggaatggaaagctccggaatataaagacaactattgcaaaattccaataatcattcaggctcagatcagattta  
ccgaaacagcgtgcatcttaattgggaattctgtagctaaaatcttcaaaaactttatccttaacacgagataatgccagagtgccattcct  
gacactttcacagggttatcgatttttcttaccaccactcaaaagaattagactggcgtagttttctcttttgcgtctataaaaagacgttcaag

agtttctttgttttcgattactttccaaattgacggggtctgagtcacttttcgcggaacttgcttgtttcatgtctcggttttacgtgtagcatatca  
aaaaacatgaaattgaccgtaaatttatcatcggcaggaaaggcaaaatcatggctaacctatcattacctttattcaactgccacggaagctg  
aacgctctgggaaggagtaactacgcttattttcatacctgggtgatctccaacaaaaattgaggaaaagtttcgaaaaataatthaatgaatata  
gaagcggccacttgctggcatagatttaggtttatctcaaagatggttgttaacaaaaccagcgaagttgatggccgaggagcaacattctc  
aactccaacagcaccaggctcatgctaggcttattcatgctgattgattttcgaacgactgagttccaaagatctgggtcgattaattgatccttgat  
ctgaaacgggctgtagctgcctaaattcatgatttctgctgacatttcataagtcggctcataaaaagcaacagttcctgtttctgagatattccat  
gctcctcctttgtgattgctggactaattggagcaaagtctgattgacctgcatatcattctcagtaattgctaaaggtagctttggagccagg  
aataggagtcatcatcgaactgtgcaagttcttctgaacttagtagcactcaagttgctgattgaggaactgcttttgatgacacctgctgac  
tagctatactaaatthaatggcagcagcaaggaatatcggggaacctttataggtaacagatccatgctctgaagataatccagaattat  
cattctgtagctatttttcactttcatccatattcatataatctctaaaacattgggaatttgcttttattcattatcgattccttgaacatccatcg  
tctcttgagatgagcttaagtaaaaactaccatcagaagcagcttagcttcaattggcatgcactttttacgaagaccatcagaagatatta  
atgattatctgcatcatcaaaaaacggacgttgaaatacgttcagtggtatctccacaggtgcttctgaaagggtgcaagaggctgttgagg  
gtgataatctatgctttcagtcgctgaaggatcatcggtgacacttcataattgaccttagaagaagcaattttggcgtattcgggaagagctcg  
aaaatgatttctgagataaaggtagcggcggcaaggcttaccggtataagaactgaataaggtaaaccgtcattaacctctgcttcagtaa  
aattatcaccaggcttaagtaagaaccagctggagtattcttagtgaaaaaggcgtgagataagattagaatcatataaagaatcatctcgt  
gaagcagctccttctgggtaaacattattggagccatttctatgtagtcatcctggctaaactggtacaccatcgctttaaactcatcgagggtcc  
agaagaaatattgagctcccggtagtatgtttaagctaggaattcgttcttattagaaggattgagcgtcgacccaaagaaaagccatcag  
attttttagtggggtttggatgaataaaataaagcatcattgtgaccgtatccttgcatatacatgctccgtaaaccatgattccaaaaggctc  
ggtagcaacgttaagttctgacatattaccaaataaggttcaccgctctcgttagacaataaccttgatgcattattaggtgaagcatccaagct  
aggctcctcaaaaaacaaagggtgtttttcaccattggagtagcctgagatccaattcagaattgagttgagtgaccgactgctctccgtataa  
atatcttcttttattgtcttccatcctgtatttattacttttcgaagactttaaataaactttaaataataggtccaatttctgtaccaataataa  
taaacgagtgtagcgtcaaaaagagtgatttagtgatataaatacaataatthaactgatacttgtcaaaattatataatthaatgatagctc  
ctatatctttttatttagaaactttcatgaattaagggaaattcagaggggtagtgatgtaagaagtaagtcacgtcgaaggtaattcctaag  
aacaccattatcaggggagaatgaagatggacaggatactaaaagaataactttataagaagattaagatcgtaaataaagataattata  
ccaaactgaaataaaaactcataattgctaaataatacacagtggaactgaaagagggtttacaaaaattgtgtagtgatccaaaaaa  
gtaaatataaactaactagcacctttatcccatgtatactcaaaagtctcttctgaagaaaaaatgcactttgactcttttttattattgtcc  
ctatactcaaaaataataatcattaaatccataactcttgatgacgcctttttatttgcgcttgctgttcaaaaataagttcaaaactttccttt  
tggtaacagccattccaacaaagatgataattgatgaccaggtgctacacttttaattgatgggttactgaagatcttcatgagcatcca  
cttaggtaactgattcatatcaactcgataaatcgaacctttcttccgcttcttcaataatcctgtttcaggcagcagcacttttcggtatc  
ctgtacttgttaaacggtgcaagtggtttatccaaaatttcgggagactctgcattaatgctgcttttcttctggtgaggtttacaagatggg  
ttcataattggctcgtttactgctggatctttcatactgcttagaggatctgacacattaaaaagtgaaatagaatcgacattcgcttttccg  
caccatcatctaaattggcgaactctcgtcatcatttattctgtatcatcatgtacagcttcaatttcaagtcggaacgttttgattgttt  
tgggagaataggtttttcataatgaggggcccagaaattcattaagcgttacaggatccttgatagttgtgtagttctttaaactcggttttgatc  
atcttcttttaaatcatcatttagataccttattatccacataaatctctgattttcttttttctcatcatttgccatctcttaggaactcttctg  
catgctgaaacaagttttcattaacgtcgatttttaggaatctgttgtcatattcttcatcggaatctgaactatcataagataccaaagacatt  
aacgaaaatttagtttaagttctgatggttttttattcaaagatgaggttggttggtggaaggcgttcaggctcagataccttaattaccg  
tatatgaaatagcagcttttttagcagataaataagcagaaaaccagtaagtaagaactctcaagaaattgactgatcataggaagttctaa  
gttcagtaattttctttttttttcttcaaaactggatcgtccaaaaaaaacaaaactaataaacttttactcttcttaaaaaataaaaagggtt  
acaaaatcaaacattacgagcttcatcaattgttctgcaactcaaccaagttccaattgacatgaagagcacagcgtttcaacgg  
cagctattcaaaaacggcaacagttattccaaccacaaacaaacaaacccattcaaggtagaagcataaaacaatagcgtataggcaag  
ctagaatataataggcagcaagtaactatgctccaatcgtgacgtccctggccacgtagaacactccagctacacactgagtttatctg  
caatgttcattagggcacaagcggaacgagctgagctaccaactgtaccacatcttctcagaagtgaagaggtaggcccagtgatttctaaag  
ataaccataatggaagtaatgcaagaccaatcaatgctgctactgatacagcagcgaagttgaaagcttggcaagttttgtattacctgccc  
aatcaaatcttactcgtgtagctgagcagcagctacacaaaagcaatagtatatgaaacagacgaagtcgtagataagactgacattgag  
gcaagatccgtagtaccatacacctgcaacaaatgtcaataattcaaggcccaatattcactacatcatcactacccaggaatagcaag  
cctgcacagtggaacccagtttcaagagcttcttactaaaactcccaagcctgacgtccattgactttaacaatataccatataagaattgca  
caagccatcaaaagcgaattgtaacagcaataggggcacctatgaaccgaaccgaacggggctccatactaaagataatthagaaga  
atgttgagaggaacaatgaaggtaagatattgtaaacaggttgaaatataccttgacttgtaaaaaaccgttttaagactcaaaaagtgcata

tgaggactagcaagcaacaaaccctcatatatctaccgctagatagcaagtggtagggtctgtttaaaaacagaagaattggttctatatt  
ccaccagatgaaaattattggaatttgaagtaaacataaaacagaagaatcctttgaaggtggagaccaactaattcatagttccggatccga  
agcactgagtgccaagagatcaagagcagaacaatgccttgatagatggcgaatgccgttatagtagcagtcataattgaaagactagcagc  
tgataattctgttttctctaatgtcctagtgaaaagaccgttatgattacttcccataattgtagtaaggatgtaaaacaactggtataccaatt  
aaccagtaaatggaattccttttccaagtgttttccgaacattatcaatttctcactcaatgctgaagcagaaggactggtctcccgttctgcttc  
ctctaaagagccataagtaggtaccgtggcaggagaagcatgtcctcgcctcgaagctcttggcgtgcttcaataaattcttgtaaggaaggag  
gtacgctggttgcacagaaccaacaaattgaggacgagacaaccataaacaatgctcgtatcttcttattcggagggtgttgtaaatggcc  
ctaaaaagggtcttctgcttccatattaataaaaagatgaactaattagaagcagaacactctcaagctctcttactttttagtggt  
gatggaagttgactgtcgtaccgtagaggcactacaaaattttatggaatcgtttcaacttggtatacagcttaagttgacaattttatgta  
ttatctcctcaaattttaagaatcatttattccctaaatcaattatgattgaatgaaaccttttttagtagtgacaaatagcaccacattata  
ataattaagatattagtgacaacatgaatgaatctatgcacaaaaatattttaaactaagtaatttagatggtatagcttataggcttttacgcc  
gcaacgacatggtgtgttcttgggcaacttcttggtagggctactcaatcaacctctcaaatcggatttactcgatacggccatggaagc  
ttataaagataaaagtgactgaacattttggcacattgtacttgagcccagtgcaaggaatcgataaagacttctgacaatctgaacaagc  
atattcagatattgccattaaccttctttttagctcgtttcgaaattgtcaaaattgactgttgatctgattttattgcctttccaaaaacgctg  
ccttgattgatcttctgacagggccaaactctttttatgacgagggatataaagagataattcttcatctaaatcggatccgatgcattactt  
aaatcgctgccggtatccaatcactgagataaagctgtctgttgatagatattgagaaaggatgcccttcccttctgactttgttagatgat  
acttttaggttgaagatgtaactggcatttaagaattttctgtagcatttattcctttcgttcacaagtagaacaagacattcacagttatc  
aggacaaaatagtttgatgaatagaagtagtaatttctgtcctggctgaatggcttaacagatctaagccaaattcttctactgatgtgta  
aatcggcaattagcatcacagtcaggttcaaaaacgagcaggccctaaaaataggcacattgcgtccaatctacttgaatgaagaatactga  
aatcttctcggcccaaaagttcgttcttcttgggtaatttcacaatcgttctgacaggtctaataatcatctccagctttagatgattctcg  
ggcgattacacaggcctcgttctgtagaagtaaaatctgttagtagaacaatttcaacttcaagaaggaagatacagagataagtaaca  
aacgaaggtgccttagaaaagcattatagaagattctgaccttggattataggctgcaattcgtgtagtttaacgttctcaattgcacct  
tccaaatcttccgtctattacattttggataacaatattaagaagaagctgcaattgatccgttcaatagagcactacaagtttgaacttt  
gtgattttagacaaatattgttcaataaaaagcgaagtacaaatgtcatcaaaaagtgcaaaatttccaactgagcttagagttccg  
cattttgtaactaatacacgaccatttaacggaggctataaattgtaacagtgaaactgaaaagcaagatccgatgatacttaagcaattt  
gtgacaagacatttctgttacaacgaatgaatgatttcttcttatttctctctatacagaaacagtacctttgtcctcagcttct  
caactttagataggtcgttttctatttctatccttctcgaagacctttaggattcaaatgcttgctatcagactggaaactgtgcttcaaaccc  
gtagtcgccaattggttctcaacgttattttagataactctataaaggaaacaaggaaaagatacaaaattataaaaagaaag  
atgaagaaagaaaaataaattcgtgaatagatagcttctcatttttagggcgcttaggcgtaagccaatgaattgtcagcttagtatatt  
tcggttagtgataaattcatttactttgactttctctattcatcttaacctactaattataattctataaattgttctgcttatttattcattct  
tacctgaaagaagatttttagaaaatgaatagcattcgttctgctgatggatcaagggtcctttaaactcatgctcatcaaggaggagccat  
ttcagaaaacgttcaacggttctcatctacaggcggtagaaaacagaataagagatatcttaactgagaagttatccccgagctctctcgatt  
atcgactctcggaggatgtggaagcatgtacaaattgtgattaaaagtaaaatgttcagggaatacaactatcacagcaccggatggt  
taactcattttaaaggaagagataaaggatgcacggatataatcttaactgagggtgacgaagaaaattctaaggatccaactgttctg  
gaaagcagtagtttctgattactactgcacatatgacaagttcaatctacggcgaattagtttcttataaacatgaatgctgtaaaagcaga  
aataacggtatattttacattatcttgatttttctaaagtaaaaaagaaaataataccagaattaagatttttgaatcctttggctttattacta  
agccatcacagtaaaatcggattcatagaatagtgagacctagccaatgatatacctaaagctttgtaacgatgtgaaagataagcagcgttaatt  
tagaagcagctcatcgttcatgctattgactgacattcagttgcaaaccaacgtatgctgaaaactcacaggttattcgggattatgcaatt  
atattgctgatagttagaagttggctatttatttctttttgttgatttctgcaaaatttatataatttttctggataaaattttgtt  
tgaagctgcatacatcaattgaatattcgagcacttagttcattttttgcatgacttttaagattgaatcagagattcattacattttattat  
aattaatttctgcaaatgcaattgaaaagtaagtaggcttgaatgccgtagctgttgaacaagggtttgttgatatacaatacagg  
gctataccgactcttgaacaagcacaagaagtgaggctaacctggagatagaaattcaaaaccacttcaagaaagatcataaacactca  
gaagtgactgtcctgaccaacaatagaacaatgggggtatcagatatcaaatcgacaagctgattcgaagcatgatagacaacgctaggt  
gttttatgacgcttggcgtatgtgtgttcttgcacctcggttactcgttctgatttcttatatagacaacttccgaatgaaagaacctg  
ctccttcttggaaactagtagattggaataaagctctagaacggcagagaagagaagtttctacttgcataaacttcaattaaccgtaa  
tagcaccttcaagaagtaaggcacatgtgaaaaggcgttgatgataaaacgaaggagcaggaaggtgagcgaactgagaagatc  
caaaaggaactgctggttatttaggtaccagatccggaaacgaagaaaacaagattaagcactacagacccttagtacgagtcaaca  
atgagctaaatgaattgcaagaagcttaccatgtcagttctactaataacaaatgccaagctttttgggcaattaatgcgacattttt

ctgcctccaactgcagatgttccggaaaatgcataacattactcgtccatgggattgtttcaagacgatattcctaaaaatggcttgcgagttt  
cttccgatgtaaagcagctgagggtcttctataatctgttgataataatcgtcctctgctgagctcccaaaagcatcagaggctttatctg  
catgaatgggaagctggaagctcgatgcaatgaaggctttttacacagaaccctcatctttcgccctcaaagcagcttatctctttatctac  
cgcaagctcctctgttgcgttctctattgatacacatgctcctcgcactcctgtggtttcaaggcctcctccatgcaaaattggcttgcactt  
gaaccagaagaagatccgatgtctcctagtcaagttctatgttggggctcctgccgtaccacatcacaaaaataatagtaatacaaaaa  
tactttatatacaactgaatggcggttttggcttctggtagtctaactgttttgaatacgttgggaaaaaccatacttcaagacaaagtac  
tccgacttctgacgaggtcaggcttttacgacgaacaagttatgactactatacaaaactgtttatctttattgctggtatggagcaattc  
ctaatagaatatatcttcaaccagttactaaagattttctacttggctcaaaatgcatcaggaaattttctaaattaaatgaatcgtttgtatt  
ctaatagcaagactgaaagaaggtatggaaatgaagccgaaatggctcactcagctcctcagctgctccaccggactgggtgtctgcaggactg  
tgccatgagccgatgagaggcaaacccatcagctttgtccacttcagctttagtaactggcctccttagcgcgttcaggatg  
gttactcctgacattgctatgtcattttcagctgggcatcctaaagcagctcgcgatttaacaagaagagtattctgtaaagacatcgtttagc  
catgacttctcgatgtgactctatatacggcaaaaaccataacgttctgacttgatccaaagataatgcaaaagctagcaaaatg  
gaaactgatgagcagaatcttcagagggcggttggtattatggcgctggaatgaaatctaccgaccaggcatgctgcagtgctaacgaatgt  
tttctattatagattatacagacatgcctcatagagttatgaacgccttgggttcacgtagatgttgaatttgaagctattacaaactttta  
gttactagaatttaatacgaaaactgtttgatataatctttactgatcaaatccttcaaaactgcccgtgaaacttataaaaatttaattctaat  
tttttaaatgctcattatgtcatttttgggttgcctgtgaaagacggcgttagatcttgcacactttgtgcagctacgtttatcccgtatcattca  
actaccaactcgttactcgtttacaatttactaaaaaaaatgctacgtgtttacctcgttttaaaaaaatttgaagcaataaagattta  
aataactcaaagtttataatgaatgcagaatctcgtgttctgcaaaaccgcaacttcattgttgagaacattccacagctctatacctacta  
gaaatgctgaaggaaaaattgataatctgttgaagaaattagtaaattgtctttatagaaaccttaagctttagagcaactcaagcaaaaa  
ctgaacatttccgacattgctcctatggctgcccctatggcagttcccggggccgctgctggtgctcctgaagaaggcaatgaagagccaagcca  
gaagaaaagacaacttgaacttaaaattggattcctttgatgaggttcgaaagcaaggttatcaaggaagtaagtcttctgctgggattgtct  
ttggtgatgctaagaaattgttgaagtgctccaaggttctaaggagaacgtattgaaagaggatgctgaagcattaaatccaagttgaa  
caacttactgcaaggtcaccttggagtaagctaggttaaaatgaaaacataaatacgaaaaagctgtaatgcttttccaatacagtttataag  
catggttcaaagattcttctacttctcatcttaaaatggaaatcttttttggagaagaaaaaatgtacgcatacatataaattggctt  
tgatcatttctgtaaaacttctactctataaatcccctttttgaccacagttggactatgacttacaatatatgcttcttctgacttaattcg  
gccttttcatataattaacaaagagattcacgaatgcatcattaaaccttcaaaaatcgtcttcaatgattccaaatcaccttctgtgattggtc  
tatagtattccaagcaatctcaggttctatttctggttctgctattgccatattgtttcgcgcatgcttattgcccgttcccgatcttcttaatcgt  
ttaatatgtcggctctagaattgacgcggtgcttggcttccactgcttctgcttctgcttcatgagcgtctaccaagttcattgcctcctgaagcc  
gagcgtcatctattatgttttttagacgcagagagtgaaacaccttcttactcaggagcattggctgctcccgaattccaattggaaccacgat  
tctaccagttttaaatacacgagtaatcatagtaataaaccactagtattccatttttaaaacttaattcacataaggtatccacaaagtagat  
gatattaaccctctgattaaaagatccagattccaactctccatatacaggaataaataatcatcttcaaggtccatgtttttatagcaaaactggg  
caggctcagttgcgataactgggaagcacttagcttattcaaaagctgcaaaaagccattctccttcaagggatccatattgaatcaaagcc  
ccagtaagtatacgtataatatacaaacgaattaaatggtttctttatataatcttttatacaattataggttttttattacatggaacataaa  
ggactaacaggacgtttatattcacatagtaatgttgaatgcaatgcttatttttaggtgataaaatgaagtttgaagagagcgtgaatagaa  
ctttatataagtaactcactcaagattacattcgttttagtacttttttctataagtaataatgaactgtacaacagagataagccaatagtaa  
tgaagccaaagaatataaaacgacgaaaagctgcaatattgtaaacgcatttaaaacatgaaggaatccgattaccactcaggcttccatg  
atgtacacgaacatgacaaatctaaaaccagcaaattgtgaatcaaaatgtgcaaaaaaaaaaataaaatgaagaacaacgaaagg  
ttgaccaacctaaatacttttaggctgaagaataagcttcaaaaattctaaatagtcgggattgagttccacaccagccttctgtgcatctgca  
aagcggtaaaggcagccttcaaaataattatcttctgattcttctgactcgttattgtgctaaatccatttaatatccgccaactaaaaccagtt  
agtaattataatacaggaataggttggctgcaaaaaatgaagccttttacaatacactttaaatactgcttcaagagattatccaaga  
gtaaatctactccaagcatcagccgagaaagcattcggaggcctttgaagaccacttatcggcgttttctgctggtttccatcaagct  
atataactcggcaaaactagatggctagccaaaaccgcttcttttagtagcaaggcgaacaggaatagggcagtcagggtagaactgcatt  
tttccaaagattataaagggagtgatcctcaaaagtaagcttccagaatattggaatccaaattggaacatgtagatgacaaaacataa  
aggggacgcaaaagatcaggtgcaagtcacgaatggatcaacagaactaaagggcgaagataattgagtgcaagttctatgtaggattg  
acaattgaattataacggaggatccgaaggcttctgtgatcctgcttccaaaactgatacgtacttttcaaaataagcacgtcaaaaag  
cgagataaagtcgacagtgatcacctggagcttctaaaccaagttgtgcttctcagtgagcagcatcaaaatgactcctcgtcatttagttcctt  
aagacgtccttggcaggctcacaatcggaaatagccaaaagagccatagagtaggctgcatgaaaatctttaggaagaccggaataatct  
tctgtttacggagatgctgctggcctcatgaatcgtacaaaaacaaggctaatgctacctcagatatacaccactttctaattttcacggctcat

ctcatacaatcccaaagttgatcaatggttgcattctcagtatataccaacatagtttcgctctcgtcccttcaacttggttacatccatttcctt  
gttctgaagaggcagatccattagcagcgccctctgacgtgtttttctaattgctgcttttttaagatgctgcagcgcaaaccttgaggacgt  
ctgccaatcatctttatgtaaagtttcttacttgtaaagaaacgttgaatcgagtgatttcaggtagaattacacacggtttagtgata  
aatagtgaaatctggtgaaaaatgaatgcaacaaagaagtgcatagtcataatgctgaatataaaataactaaaagcatataaaatataat  
gttttattaaggttgcattaatcatatattactagtttaaaataatataattgttactaaacgaaacaagcatattacttattttttac  
atattacataaaacgcttataagcatattttactaggaacttaactcgtttatctgtcttaatactcatataagcttggtttaaaagtaaaat  
cgaacattaatattcccttttctatatttctaacatttgagatcaagtaaaagattatcatacattttatgagttttagttgatgtctcataaac  
cttccgctattgagtataccgacaagtttcgttattttagtatactcaagtgactcgtaaccgaatagtaaaacaaatgacagatgataat  
gttgacaaaatgatttgctaaaggagtggtctaaagaaacttcaatgttaaattccattcactaatcatttgatgcttaactcgataggaatg  
atgcagaaaagtctgtcacaataaaaattacacaggctaaagcaaacctaacagtaaaaaatccaattatgaaaagatgcacagttacttg  
agaatatcgagctaatgagttggaaaaatggttctactgaattactgaaaaacgtactagctaatccaatcagactcaaagtagctttcag  
gaataagctcataagcgcatgagtgctggatgaacattaattatagtaacacatgaagcactgaaggggttcatcgaagttcatatagatcaa  
aagttacatattttcccttcacctaagctgaaatctcaatataattcaattaacatgtctttctccgattaattctttattcttttaacttg  
actttcaactcagctgactttgagcgttttcttcttccactcaaagtagactgttgggtaaaccagctcaattttcagtttcttagtttaaacat  
gtatccttctatgaaaaatgattaatcttaagagcagcaaggggtatgctgaaaaaaggctcgcattataaagataaacgctggatactaac  
tgattaattacaggggaaacggtagaacgaccacctgttggattatggtacaaaatctgaaagcattttcaatagatataaactctatcga  
attttagacaagcaggacgatctgccaggtacgcgtactactcatcaggttttcggggtttcaactaaatcttcttagaataccacaa  
actcagatcaaagcagagtttttgaatgtgtcaactccagagacgtctgtgagttgactctcaaccataagcgttttgacggtttgcctg  
atgccggcattttttagcgatatttagtaattcctcaggcgttgcatgctcagcaaaaaggcccgactttccggagcc  
gttggtaacaccagaagatctgaaaagctgaaaaggtcccaatattccagctaaattaggatagtaattggatgcgattctttgacaagag  
aaaatttagatgggaaagtctcttttggggtttcaggagcacctggactattatggcttacatgattgaaggaggcggttcgaaggcgttac  
aaaagcaaagacttggctctccgttaccagaggcttctcatcgtcttttaaccatggttactgatgtaccattgtttatctgacgcaacaggtt  
acgctggggctcaagatgttactactttgtgtattgatgtcaactaataatatttagatgctacaaatattcgattcttgggcccggagagcttca  
cctcaggatttttcgaatcttacccttacttggttaaaattgtgaaggggtgaaaaaggaactgaaaaaagcaaacgaaaccccggtccc  
atgattgtatttcaaagggagcctggatgcccttgacaagctttgtattctggttacgacgtaattggcttggactatagatcccaggga  
ggctgttctgattcgtggagagcgtcgcttatattcaaggaatttagatccaatctctatacggaggtagagaaatcattgaaagcgtaca  
aaagagatgattgaggcttttaattggtgaaagcaaggctatattataaattgggacatggtataaacctgggtgaaatccagacgatgtcgt  
ttcttttagaacagtgacacaagatggctcctcaaaattgagccacaaataaaactatgttttcttagatgctcattgtctagctctttgact  
tgacttaattcttcaatggcttggcttctactccttttattcgctccttgaagtttaaatgcctttctatttttggggagctttgcaaaagcaatt  
aaaatagatctgactctcaggtttccacacaagaaaataattcatttcttttggtaactttctgcccatttaaaaggataagcattcactc  
gatcactcaatgttgacattttgtaattactcgtagatagcggttttctacacttagcttataattgaaaaattatgctactttctttttagctgtat  
attttaggtctgtttggcaatattggggaggatgtacctgtccttaaggcaaaactattttctataaataatgtatatacataaccagttatagtc  
aattagaattatgaatctgtccatagctaaatagttgtgcttatccaaacataatacagactttattttttctgtagcacgtataataaat  
aattattattttcttctatgtgtttattctttaaattgtatgtagaaaaatttggatataatccgacaaaaggtacacagcttccatactacc  
ccaaaaaacaattctccgaaaataagcaattggttggctaaataaaaaaaggaattaaagattttgtagcgtttgatacaagaagtaccac  
ttacttaaaagtcgagaattattcacgattgtgtctcaaaaggtgagatataaccaattcatggatattgcggatcgaattttgcaaaacaacgt  
tatttcaggaattatattttacctaagatctataacccttagctgttttctgacaaaattttcttaagtatactagcattcgttcaataactt  
accaaaatggactataaaagtttaagttactccttaacgattcaatttagttcaagtcattgtatgaagcatccagttttttcaattaaagtga  
atgctaactcggtagacttttctatcctttgttcttttgcgttgccatcttgatcattcgttacaggtacctaacaataactctcgaacttctcag  
aagcccaataagagaggctaaagcttggctctgatgctagcgtccaaataagtgaaacaaaatcgggtttcaaaattatctcgatgaggtatgg  
ttacatacatattaggttcaaaaccactaacactatctagtttttaagtgccatcagatatttgggtacttagaaaaactgtctttgtagaattag  
ctcggcatattcaaactcgcgggttctgaaggagatacaattgatcttgacgaagaatctttttatcctggttggatggctgtttcaagtt  
atacatctacagaacctccaatgatgacggttcaagagatccatcatccctgactctgagtagcaggtcttactgaagttccaatggtgccc  
gctttctagcttttctagctttagaattattcacagaaattgttccagaagttcaattgtcccaagcaccactcagtcacaggtacgccaacag  
atctttagacaacctttccctgtaaacagcattggctctaaaaaatcacagtcgaaagatcaatttaactaaaggagaaatctcaattgttg  
ctaaagctaaatcgatactacgatagctgttatacccgggaagcgcctttcatcattgggtcgtaaattccctaattcagtgctcagatagttcaa  
gttattcttacagttttcaacgagttacattctctacaggcttgagatcttgattgtccgatgctattttcagatagagaaaaactcaatgct  
atcacctctatgaattgcaaaattatattcgtggtgatatcattgaaactttcaaaaatgaagcaaaatctgagaataggaataagaagttaaa

ggcgggtattatctcaaaaaagggccctgccatcgactggcaacttaataagaaatgaggttttgggtctgaggtgatcgttcaac  
agcaaatgcgggtgacttacttctcaaaaatcctcacgctacttctcaatcagtcgctccaaatatgaagcggctaccgcttctgagcat  
actctagagaagtgggtgattatgatgtatctctcttaggaatggtttgtacattgcattctgaattctctggcatagccaattatggtataa  
aatcccagagtactgcttctcagtggtgatgagttgtctctggcgagcaagaaagtataaatctactgatcaatctgaaaagtctagcaaaag  
ttgacttcttaggtcaacttgctatgatgagtgctaccggcgtcaacgaagatactaaaagccctgcaataagcaacaaaaacaatctactatcc  
tcgagtttgcaaaagaaattgaaattatctataagaaaaagactaccggtgttcagcaggggtgatcatgcagatggcgtatcttatacattga  
tggtttctggatgcaacttgccatctaaagtagctacttacggcactcaagaacaattagagcaacattctttatgatgaaaccaggtggtttg  
gtaaattatcaagcttgcgtttccaactatcggctcgtttgtgaacgtaactgctaggacagatgtcttagtaggatattgccgcgtaccgcttga  
aagaataattgaacaggaaccttaatttcttatcattgctaaaagacttatcttttagttcctcttactacttaaacttgattttgagtcggt  
tggattcacctaaatcccgatcaagtattatcataagggagatccaagcattcaatatacgtagttcaaacggcgtttaaggctattgac  
gacagtaatacgaagcaaatctgattactttgatgaataggaaatggtgatagtcaggtgaaactggaaatgctaatcaatgccccagaa  
gcagtacattatgcaatcgagattcagaactgcaaaaatccctcagacattgttaatgctctctcttagccaccctgctgttggctgcagc  
tctcaaaaatcattgcaaacggaatgcatataatgctaaataacaagttcattatggaggattcatcaaaactaagagggaaaagcatagata  
cgtacactagctgttgacttcttcaaccgatttttaacttttctcaaaaatcaacttttcttatccgttttgggtatccgtttaa  
atgagacagctcagtttagaacatttaggaaaatcagcttttagtcgcatgggtagattcaaacctgagctatcttccgatttggagac  
aaatgatattttgattacgttgctgacacaaatgttggtactacgtttcaaacctgctacggcaagctgattgatataatcctgcaga  
agcagatcggaaatcctgaattggggaatttgaagttacttgattgcaatgaaatgtactgctcgaagagtagtactatacatcctgagag  
attctgcttcaggattaacaagaactggttaaggagcgtccatgggtatacgtcatcatcacttacagttacgcgctggacgggacaatga  
aatggtgatcataacgatggaaaagaatttctcaacataattaggtccaaagtaatgaaatcctcattatggattgaaaatacatcgattgaa  
acacctacatcctgtctatcaaacgaaccgagcacaggagagtgacttgcacgttttagctaggaggatttgcggcaagctatcggactggttt  
aggaggtggaggtccagagggatctcagattggtgctctatgcatagaagaagctggaatcctttgatatttgggtgctgagata  
ggagcattcaatggcggattgatgcccgcgaagctgatctggtgccaatgttggctggcggaagaagtttgggaagaatggcaattatgg  
agattgtactagattgactatcctcaggtcgttacaccactggccatgaatttaacgaggtatctggaaaacttgggaaagtcatattga  
ggattttggctaccattttatgtaatacgaactataactcattctgtaggacgttcactcaagtggttatgctggagatattcgagctag  
tatgcttttagccggttggtaacctccaatgctctcgataatggggatagctattagatggaggttataggataaccttactgtaacacatgc  
agtctctggagctaacacaatattgcaattgatgtggaagtggagattctcgtttggcaatggattatggagatactgttccgggtgctgggct  
ttattcgtcgttggattcctttatctgaaaaagcatatcctcactcgtgatattcagcttagattaacatattgacagtggtgctattggcg  
agaaagttaaatcgaccagggttggtttatgctcctcgttacagattcaaacgctggaatttggaaagttcagaagatctatgggtt  
ggttatgaatacggcaagctttatgataagctcaagacagaaggtaaactgacgggattcttggaaactagtagtactcagtaacaaaagtatcc  
aaagtattatcgccccgacggaactcattataacgaatgttatgattttgatacaaacgtgatttacaatatagctattgaaatgataatga  
atattatcatattcgacaaccttttctgcaaggtcaactactgcacaagtgatttaataacttttggatatacaaaaggaaggctagttaga  
ataatataatgaaaatcttttatttattgattgtttgataaacctgacagtaatagcgtaaaccaataaagaactctcgccttgactctg  
tgatataataacctcactaggagttactaccataactgctgagctgtaaacagctatatacgaatggagtagtcaacgaaatctttacct  
tattgactgcataagcctggcgaataaagctgctggctaggagtaatatgttaacctttacatccaaggaatcatcattgcttatgtacttt  
tattcattgtcgaagtttgagaaagtatgcggtggcatttcttttagcttgcgagaaaaggctgtcaacggtgcttaacagaaccgtctgagtc  
atcattattctgaatcagcaatctaattttctactattcgaaacctcttattagtgctgttctagcttctgttgggtggcgtgttgcaggacttacga  
tcggtcttatgggatgcgacgaagtgtattgcaagtttggagcagagtggtgatcgttacgaaagaacatagcgaaaaagtttgaagcttt  
taaaccgtgtaagcactgggtgctggtcactttgctgttggcaatgtaattgtaataaagcattgccgattgattcagcagatcattggcggg  
ggatggccggcgttttaactcaacggcggcgttggatttttggagaagtaattccacaagctttatgtgctcgttatggattgtctattggtgc  
taaattggaaccactggttctgtttatgatgacttgcctcatccaatgcttatccaacggcttattattggatgatccttgggagaagatcatgg  
tataatgataaaaagctgggttgaactctcgtcactttgcataggatctggccttagataaactgaatcaggatgaggtgacgattattac  
ggctgtttggatttacgggaaaagtcagcgaagagtattatgacacctattaggatgtttttaccctccaatggaccgctcgtggatgaaca  
actaattggcgatattattgtgctggttattcgggattcccgatgacatagaccaggcttctctcatgattttatcggtatgttactactaaaacgct  
aatcggttatgatccagatgactgttggcggtagcaaatggccttgaaccttacctcaaacctttccagatacctcgttggatctaatga  
actattgtcaagagggaagagtcatatgatcctatctgatcatcctggcgataaatttgggtcttaggcgtcatcactctgaagacattatc  
gaagagtttaattggggaggaatattgatgagacggatgctatattgatgttcaaaagggttaccgctgtgagttacaacaatgaattttgg  
aatagattatccaccgctctcattgatacaatggctgctttaaacaagcggctcgtacgacagtgaaatggagaaagtcaaatggatgagca  
acgccagtttgaacctaggaatccgctatgaatcctggtatgttccaatgagcagtaaaaggtgaaggcactgttagcatcaagaacg

agacgggttacggaagtatggaagcatcaaatgaaagtgttgcctctcttctaagaaggtgacaaagttgaaacggaatagaggctcactc  
aaaaagcataccaaatattcaagaatacacttcagaggatatttctcagcgtgacttagaacatcaggcaaatgacggtattcaagagcatgtta  
cacatgaccacaaccgtagggaagaagaagacgcttccaattgattataataagattgctgagcgtggtttgatcagttaaacggtaaggag  
actgcaaaaaaaccttctcgatttaatgcagactcccaagaattatgagcaaaaagtcagatagcgtatcttctgattctgagaggacatttaca  
ggaaaaagagtaagacttggtaacgtaattgaaagcaatcttctcctgaggatgtagcgcattgttatcgaaccatataaaaggaccgt  
taacgaaaatccggaagatattgtgaaatggtggaacgaaatggtattctgtaccgaaagtcagcatcacgactaatgattctcttgaagaga  
atgagtcttaaacattggtgatccaatatgcatagctccattgaaaaactcctctgttagttcttcgagaccttcaaaaaacaaaagaaaa  
agagaaggagtaaaaaataaaaaataaggtatggggatTTTTTaaagtcactagatgttttcatttaaaactaaattatcgttcgatgtcgcggt  
ttgctttcatatcgccccattggttattctatttctatttattcctaattattcaaatatgatcagatcagacgctcaatctttatttattcttaactaa  
atTTTTgatgatttctgatgaatctgagctctatgtgaaatgctgtttcaatatgatgcaccacataataccttctgctagatgaacagataat  
gccaattctattgtatacattctacatagctgtagtcaaaatccttagaagtagccagtaatttgtgtaccctaattggatatttaactggcaa  
gggtattcgtggttcataaagcaatatacctggaaaatgctttatactaagatgaaatctcggatggtggatgatgccgatgctatagaattatgt  
ataaactaaaacaaaataatttaaagtcaaacagtgcttatcaatttggtaaagggaaggttaattgaaggcatagctcaatgaaaac  
acataatattcaagcaattttagactcttcacatcaacactgtaaagaaagggtataatgtggcttccagaagtacaaagtatgtttaaact  
aaaagtaacaattactaaagataaaaactagaattggaattggtgtaacaagttggggcttctattcatggtacttgaaggctagaagaaga  
caagactactgacttttttctattaagattctaataattacatttagggcgtaataatgctgtttgacggccttactactcttggaaacgta  
tgttgaatcagtcggatagctggtgtctgtatagcaactcaagcaagccagagaaacagaagtctatgctttattctaagaaggacctgtaatta  
gactaacctcttttagatcttctgtatcaggcgtattcatgattataggacctcgaaatcagcaaacctttttataagaaaagaaagaatgctg  
ggaagcataagtttgtggaggattcctcctcacgatcctacgcttctgttcttggtttcttgaatgcctcggattcttattcttccgggt  
gtttatcccatcattattagcttttaaggtcttgccttatattggaccttctggtgactgttacttaccagcaaagtcctgtgaaagcgtgt  
cctgtttctaatgataaaagattacagcataacatactctttaaagataagttttaaagtaaatgattcgaatggagattagctcttcttaact  
tacaacaatcttataataaactcttattcttcttcttctgctttcaacaaactactacggttgcaatttgcattggaatcatattcattc  
ataaacgttttctaccttttgaagcaacagaagggtataacctattttagacttttagttacattcatatgtgcattgctgataataaacgag  
tttcttaaagtaggggtcaaaccaagaatctgtatacgggacaaagcatgaacctgaaaacttaattaacaacttggatataatgatttcaagg  
accagtagctaataaggaagaatcttgagtgacggtgacctgaacctcaagattcatcactcgaacatttgaaccacataat  
caagagcaacaaaaagtcagaggcagttaccacagaaccacaagaggtgatgagggagcagatttattttaaagaccatgctggcaaga  
tatctcaagttcttctacaggcttgggtcggttaattccgggtttacaagatcagtaaaaggaatgttgatggaagttgggatgtcgccttgcg  
atgccaggcggaatttcaggagcacttccagtaaatcgtgtatgtggcgagcatcaatgatacagagttgttcttgcaggatctttaaaggacc  
tggcgatattctcaaaagaggcaaccaagttattgttcatattagcaccttcataattgactttagcgggtgtagaagggttccagtttcaacc  
gtaaccagaagtttccaatctgttaacgatttggaaacaagaagacattctgtgaccgaaaactttaaagttccaatatacacggggggagg  
aaaaaaatcctttctgtcataaataactacattggtctatataccagttagaatcattattcattctcaagcacaattttacgtacattcgatcaa  
ttcaagattcctacgtatgcagcaaatcatcagctggtggaagcatgtgaggaagctactacgatgatccttggcttcatcaacccaaaaa  
actgagcgcctgtagtgcatttgaagaattcctgttttccatcttggattctgtaggtaagtagcaagtagcgtcaaaaagaaccgattttga  
gcttgccttttaaaggtaaccacgttcttgcatttaataatgtatgctccttctgctgctgaaaacattcttttctgaggactgtgttttgg  
cttttctcgttctacttggaaattataagtagcaataggatattatgtaatgctgcttataatattgctaataatataatgcttgataacgaaat  
cataaatacaaaacgagtggtataactacttactatggcttcccaatgatcaattgtagaaagcttgatacagaatttatacgaacaatga  
tattgcattcagtaggtagataaagcatgttggagaagaaaaaggaaaaaaatacccccaatagtagcactat  
agatgctacctgattctagaaaagccatcgcaaaaagactgtttactaacaagcagacttaattgttcttaagaaagaaagcttagctat  
ccaaggacacgtatttattagatttcaacatatatagtttaaattgtgtatgaagcaatacatggaacaaaactcgccatttggcatga  
caatgaaaatagattaaataaaaacgaacgtaaatgaatcagcaaaaaacaaaaggaaacaaacatatagccattcgttgaattttttaa  
gaaaaataaataagagttatcatttcggttgcctaaagtaaaaaatcttccgaaagtttctgattgaaaactgtgcttcagagatccttaccag  
atttcagacgttaagacagatagcaaaaactaaagaataaaaaacaaaaaacaattcaaaattaaagcgggtaacatctgtaatttaact  
ctttgcttgagtcgcccagcaaggtactagaattaaactggtcgggaagccttggaaactagtagaagccgaatttggcgagaactgttcatggag  
ggaggagcagcttattccgattagcagaaagtgttctgctgagaattgcaacggcagcaagcatcatttagccaccttgaagcttcttct  
ctacaagtaaagctcgggttgagaagcctccataattctgtatgctttaaactgcttgaattccggcgttgcaagatatcatctagcagga  
ttcatcgcatgtgtattttagaagaagtaggcttgtgacgccctatcttctggtgtttaaactttctatagaagcaatcccaattttatcaaa  
aaccttctgattcttcttggagatttccctcaacatcctcctcagatctctgcttttcttcttctcatcatgacttgaaggtgcttttgaag  
actcgttcagctcccaaaaacatgttaccagctctgtacttcttctatcgttgcctaatgaaataaatcatgcagatcggctcatctaaagaa



tcgtcgtcgtttggatctttcaaaatcttattgtcaaaaattgttgaaaattgacgatgatatacttttctcaattgtccagcagtcattaaa  
cggtagaccacaacatcttttttgcaccaatctccaagctggtcacgagcctgggcatccggtgatggattccagctgggtcgaataatagac  
acgatctgctccagttaaattaaccaacccgcaacgcgaggtgtcaataaaaatacatcataaatgctgttttgtgaaattcaactaaa  
ccttgcgaagaccaattgatgctccatccatacggcagtaacgaatttcaggaatacctttgatgctgttccaaaatacaagcatttgcg  
tgtctgggaaaaaagtaatgtacgggtctttgcttctccaagctgtaacagagaattcacaactccaatttccagacttttaggatctccat  
aatgatagctctttttagataaaaattcacgaacaaccaaactggtgatattacataatcttccaaaatacaattccataaagcatttgacg  
cttgccatttaaaattttgcataccgaaccattcaagaaatcctggtaggctttacgttgaagaggagtcagcttgcaaaaacaaactgttcg  
gatttttggcaggtctgccctacatctagcttcatcttctgtaacaagatggagatattaagtgcggaagcatacaggcacacttgtaagcag  
tttgtactgaacgtttgatgacattgcataccaccaatattgataggaagagcgaattgatttggaaaacaggcagcgttccaaagcagcgg  
gaaaaacaaatcaataagttccacagttcaattaattatttgaataggggtacctgataaaaataatcgatggggggttcttactgtctac  
aatttacagacatttcagaatctggattccgaatcttatgctccatctaaaacgcaataacccattcttggtaataataaatcgctgtaaag  
acgtaaccagcatatgttgaatcaatacatgtccttcagtaaacacgctatctaccaagctttggcataactgtgaaatgatttagaagcatt  
gggtcacattagcagcttctctacagatccttctcctcagagatcgatattgtcttttctcgggtgaagagcaccactacctgtagcatg  
caaaaacaaacacgtaaaggacccaccattgatggaactcattaccattgtttcattaaggtagccggacaaaacaaatcaacgctggctttc  
gtacatccttgaatggggaaggaagaaaagatacaattgtattgttttccaatccatttctcactatgataccacctgcttctggc  
tgtaaagttccataaccactgtacacatgtaactgtatcgaaaaaggtgaggtcgaatgtcaccaggcagcgtgaaaccgcttcaaaagtt  
tggccgcgttggtaggatgtggtctaaaccattctccgtatctacgcttaataagattgattggtagaatttgttcattagacgtctcggattct  
tcttgtttactcgttctgttttctcgttaatagattgcgctcggtaaccaggaaatgaaacgcttacgatacactaaatcatcaccatcgtctaca  
gttgaagtagccgttggtagcattctcagactgcgataatcttcttcttcttcttggcacaataatcatcatgctcttcggttgtcacaac  
actagtcccttgatattcgtgcaccagcaaattcatgtttctcgggtatcacttgattactgggtgtagtcatgaaagtcggaacgttttcaat  
tccgaaaaatttccgaaaggtgaattttactgtacgaatcaattctggcgtcagacttctcattagcatgaggatcagtaaocgagtttgc  
gacctctcaacaccttccatacgaattttatatcattctcatcagatttaagttctgaagcgttgacgaaattatccagttgcttccgaagat  
ttcctttcagcctaatttgcgtaaacgactatcaattcgcgctccaattgacgagcttttgttgcggtatcaatctccttctgcaccttttcaac  
ctttttttcaatctctcgtctcactagcgatatttgatctgctgaatttgcacatcgcgctcaaaactagcttgatcaacagtgaaactccta  
attgagcaattcctgattgattccatattctctgtatatttccgtactagtagaggatcattgtattacaatacataaatgatgattgctgctgat  
tgtgcagatggcaaacaccaacacctgtatttacttagcgaacgggtgcgctatgctacaatatttgggtaacatcgttcaagtaacatgta  
ctgcctcctaaactgtgtgacgcgattgttcttgaagtcgcaataaaagggaggtagatgggaatggatgctaaactccttgactaag  
aagtttacagatattcaactaagaccattccaagctctacagagcaaccatttaataccaagttcagagaattcgtaaaaagtgaaatag  
gtcaaaaatcacagctgaattctacaactgtcttgaattgaaactgccattcgtttcgttattgaaattagtgtaagaaccgcttgaagttgt  
acgctgaggaatgttgcacaagaatcacttatagctaaaaaacatgactttgaggagaaacgttaaggagctatttcaatcctagacttact  
agttgtcttgaatgaaattgatgcttctactgtgatgagcttccggttttaatttttagaggagttatggacattcatagctaacggagtgccg  
aaggctgtatgattttgagacaagatcagttctttggatggttagtcagtaacgtggtcgtggacctgtttactgcgtatttgaacgaatt  
gttgcgccgactttcgagacaaattgacctgcgcttgggtcgcattcatatttgtcagcaaagctttgtccagaagaaaggagcggctct  
aatgttctggtgattataatctagaaaattcagtaattactaccaaggttctgcaccaaatatccctgcatccgatggaaatgaagccttattc  
tcaaaaagtcagctctctatcaaatatttgggaattacaagatcgttgcagccaccaaaaattgcacagatttctgataatttcaaaaag  
ttttgaattccacaaatactatcttgaatcttttagtctattcaaaaaacacatttttttagataatcccaaacctactattaaccctacgtcg  
aatgctttgctccgaaaagtacacagttataaacgacaatctatgtccaattacattcgttcccctcctttttgacttcaactgatagatga  
aagtttctgctcagttttgctgcaggtgttatttatgtattttgttagactttttaaagaacgattggagtcagccaaaaccgtcctttca  
caataagctgtagcctaatacaagttatctgacgaagatgatgttttgcgttaaaggaattttagtactaacaatattgtaggagaa  
gaacgtgtcaaacctactgaatcggattttgcacttttaaaagaactaaagaatgggtcctattttgatacagtgacatccgtgatcaacgtggaa  
agtaattggaaaaattggaaaggtttggtgtcttctgttgaaaagccttacttgataaatccatttttagatgaagcgggtgctgttcaaaaa  
agttgaggtacgctccgaaaatccgttatgcatgggtaatgcagcgttgcataaatggaaaaatgctggagagaattcctttagaagatt  
aaaaaagaaagaaagatatcagatacctactccgaaaagttccttctggtgtaagacacgactctgctgaaattgaagagtcggttaaaggaa  
gatgagcagaaatcatcaacaagcaaaagctcaaaaactggcgtgctttcgttctgcgataattcgcatttagaagccttgaatttaccg  
ggttgggtgatctggagctattgtctcaggtattgaaggtacacagattggaaaagccgaaaacaaatataatcctgcttgcacataaac  
atcgttgagaagggtgatgaaaagttacatgagaaagtgatagaagaacaaaaaacgaggaattcaagatgctacgccaatggatgaaga  
taaagaaccagagttcaaggagagcagcagattgagcctgtaaccacaaaggaagattgaaaaagtcgaatgatcagaaggatttctac  
agatcttcagaaggaaaaatggaaaagatgaagctgaatatgaaagcaaaaaagaagatggtaccgataaacacaaaatcagtgcttaag

atcaatccgataaagtaagtaatccctctgatgaaaactctacagcagcgcatgaggaaagaacagaggaggccgagaacgtcaaagattcag  
aaaataagaagcgatctcgagaaggagatgtaaatgaagaaactattagtttaagtccaaaacgtcaaaaaactgaagagaagagaacact  
gattcttagttggaagtcttaatgatgtaaggataatgtctacaaagttttgttggttaggaattttcatcatagtttaattaattatctta  
taaagtaaaaagattacgacgtattttaggcctaatttgggttttctgttctgaatgctgtattcggttagtttaacttaggaaatctaaagata  
aaataaaaatcaaatgaaggtttaccagaataactactcgtttatgcaggctcgtgaatttgatccagagagtacattcagaaatggaaatcct  
aaaagcatccataacatagaaaagacagacagactgaaaggcactaggttaaaagagtaagtaacggtgactggaataaagtaacctaccact  
aagacatttctgatacgaatgagttgaattccagtaaaatctctacaattgcaaagatcgagctacccataaatcaacgtacaggagcaac  
agtaagcattttttttatattaaggatatcaaaaaagcgtcttgtaagaaaaagcacttgcaaaaatagagagaaaatccctctctc  
aaaacgtcaatataaacaagacactaacctattgtaaacaaagtttagggagacataaacaatgcacgaaatggtagcgtcacacgtttcgt  
aatgattttcttaattgcttggcttcgaaagttcgaacaaagcatctttgcttctgatcgagttggtaaaaataatcctcaagaaagagacaaa  
ggagcatagaagccgtactgtgacagatgaatcaagttatctttttctgaattcatattgatagggcagcttgtaagtgcccatgtctacttt  
cccaactttctaaactcattcatctaatatgccaggtcagatttctgacttcacaaaaagatccttaattacctcttttagcattttctcaatc  
atgtttatccaataacaatcattaagccttaaatgctcttcgacacatcctcttttcaagagcgggtcccaagcgtccttctcattatctccact  
gagttgggtgtggcgtctggagtcaaacctattttttatttcaattgcagaataaaaataaataagtaatatgaaaatagatcggaattggaa  
atatatagtcgagaaatgatgagcgttcgagtaagtaaggatagtgagtaggtgacggttatcatcaggaatacggtaaaaagtatataga  
tcttttaggttcatctttcacttagagtaactccaacaaaataaaaataataataatctgctctttaccgaggatactgtgatgaatattgtggt  
gacttgagaaatgggtgagcaacagcaggagtccggagcagaagatgagccagttatcatcagctttataatggattgatctccgtcggaggt  
tttctaaaggtagcatttttccgtgataactaaatcgacaattttgcatctctgtcagctcctcctaaagaacgaggttttcccat  
gagcttaagacgaaatccgtcaatagaagatcaccattggcacaagaggcagctgcaatttcagcacttaattctgctttgaagttgacaaag  
gcacattttcccgatgagaacaacacagattttaaggaccaaattgttcaaatgtcttgaatttataatccgggagttcgtcctcaaca  
ccaataataaaaagagaagccttgataatagtttagtttgaatcctggatcctgatatttactacaattttttatcttttagggctccatgtca  
actgaaagcaaacacgaccgtttgcaactttttataggaagagagactttcagaactttggacgtatcactgtcttagcatcctcaaga  
gctgttagattctgttcatcaatcttctacgcggttttggtagggctctcgtcgtcgtctttcgaaccagattctagcagcggcattgga  
ctcttgactatcatatgggtttcttctgttttcaagagctttgctggttttagcaaaagaactcccgtttatgtcgtttgttggtccattgtaccat  
tttaagcagcatcacgtaaagcaatctattgtttagtttagtttataataatcattctctttctatgagcatcacataccggtaaccaaattgca  
aatcgagcatacacgcttgacagcaattttcaatcgagcacaacctacacataattgagttttcctctcttcttccctagtagttgaccaacgga  
atactgtacacggccgcaacatattttgattctgtcctaaaggttcacgagtcatacgaacatacgaattatctcctagacaacgttcgcaat  
actggaaattcaacatctcccattcaattttatgacgtcgccttttgtagtaaaagacatgattaaaacgacgttttagttaagttcgtggagtt  
gataggtgtacttgtaaacctcagaaaaccgactaaaatggttttcgaataaaaagaatttaagctagatattttaagtaattcatatgct  
aaaattgtatatcttcataaaacttagatcatattctgaaatagctatggagcaaaaattacatatacaggaggggcaaaagacaatattac  
ggcggatgaggtttgacattctccattttagaatacattgaagcatcacctacaacacgagctgacctcgacattctcgaagaactcatcaa  
ccgaatgattgtacgaacaatggaaccttcaaaaatctgtcaaatcgggtgattcgattaaacgacatacctctgcccattcataaaaactcc  
atcaagccaaagcgtggttgagattcaaaatcattccctcattaaagtataaacttgatgcttttctggatgagattactcgtcagcaacct  
gaagaatcatcttttctttttagatgggaagaaatattgggttcaactccgtctctcatcaaaaaaaaagcagaaagcaaggctatagt  
ctctcacaagaaaactcaccnaacttttcaaaaatcagttctgttaacaccagttcgttagttgagttatctcacacgcaacacgaccttt  
aataaaacggttttttcatcaatgtattgaagcttgaagtaccgaaattctgttcataatcaggaagaagctcaaggtttgatcagagat  
aaaatcccgaagtttctgatatttttaagtcattcttgaagcatagtgcatattgggtaacaaaattatctgtagtaatggttcgtaaa  
acataagttttgtccacatattgcttctcttgagcctatggaaatcaaaatcttctattgctccaatccgcttcatcaaaaacattgtcatt  
aatcccttaactgaagcaaatgatcgctcaaccttcaaaagcaccctcagcgtcagctatacctcccaaatcaatacgtaaaatggtttt  
acatacacgtcaacgcttgaaagactaaagctcaaaatggaactgatttttcagtaaagagtgaaagcatcaatataccaagaaaggtt  
ctgtgaaagccagtaaatctgaaggcgttcatagcattctgaggtgtaggtaagcaacttcaatgtacaatctcagaagtagtacgcattg  
ctgtcctaatacagcggatgctacgagtactatcaggttctgtatagacaattaatcttccatcacgaaagacgcgtcttctgtagctcgga  
gatagcttcaaatgcaattcttagagtagctttatagcttctcactgtaaactatgattccttcatctgttataatctttcattgagcttttct  
aagtaaaagagctgcttcttacttgattgattcagcttcatgttgcggcatcagtgctgatttgatttctactaaaactcgtttaaactatgct  
tcgattctcaatgtttcaacacgaagcaaataggatcatattatagttagctgaactgactgatcaattttgcaaggaccgagaatcatgt  
gtcgtaaaactggctgtatctggaagatcagctcgagataaaataaactgtcctgtaacatctaaaccagcttccagctcagctgaacattg  
agtatattcaccaggtaaaagctcacggaactctgctcatgtttctggataccggagaacacaacagatcgagcaggcatattaacacca  
tcgcaaatgtttagttgcaaaaaggatttgacaaggcctcgtgaaacaaaagctcaactatcttctgactataggtagtaatccgcatgatg

taccgctagaccctagaagcatttcacgcatacaccgatctgaggaagtgttctgtcttcttccaggcgagctacggcctttcaatgact  
atatgaacttcactttttctgatggtattcaaatccctgttcgacaaagtgtcaacgtattcctcacaacgtttttgaaaagacaagataatt  
actggaatagtttctgaagggtcccagctaaatgtaccaagtatttgcattctggcggttcagcagacttggcattacctctccacgcat  
caaattaacttgagatccccgaccacgaggtgtccaccacgaccttagcattgttgttggacgggtgtaatatttatcaggcttctaagcg  
tatcattcgagcttgtatccgtccattaggaacctgcatgttgcactacctatagacgttattttaaccataaataatgttcaagagga  
acaggtcgcttagaagtagatataacgtatatattttctttagtagctcaacccatgaagcaaattccttgttggcactgtagcagagag  
aaggattacagttatatgaggagggagcatgataattacttctccaaacaacaccttccagatcattaacgtaatgtacttcatcga  
aaaat aacaattctacatcgcaatcaaatcagcaccacgatataacatgcttctgaaaatttctgtagtcataatcagacatgatgctctg  
gattaact  
tgtacatcaccagtaaggatactacatcttcaaattttcttaaagctctaaacttttgattgagagtgcttaatgggcaagtgtaaatagc  
cttggctcatgtgcttctgggcaagcgcaatagcgtattctgccacaacggtttctgactagtggggcagccacaatacgaatcaccatt  
tccagatgataaacagcttcttctgaaagctatcgagctcaaaaggggaagctaagggccatttcaggtaccaactgatggaagtattatagta  
gctcggctatctacaacatgagcatattcttctgttggagacagtgcacttgaggaaggaagggcaacgatgggtgcttcttgcgggaagtaag  
tcatcaatctcagtggtttgagttaatgctcttcagatgctcatttaattcattaagtgtagtaaattggcgggtagaagggcgaccattttg  
tccatgtatcaggattaaattcatcattcaagttgttccctcgacggattgttcataactaagcctctagaaaaccaggaggaacttgataca  
aacatctctccctcaacgcttctgactggcttagggcagctgttctgaggatcatcaggatcatccgcaagaagggtatattattgta  
ctgctcgaacaaattcacttttgaagcaggttctcaaaaagcttgatgaattttcgaatttagatcagcaatgtcttcagaaacttcttga  
atctatgatatgaccttctaactcttgccttcaaatgcaagtagtgcgcaacgcttggggaattgaaagaacattatggtctacctctt  
ttccattgttttgaatttttaccattcatgagagaacgacttgcaggttaagaagggttgattcttgattatataccaacgatgagac  
gaaatcacctcgctcgtacatttttgtatttagattatctcaacatgtcttaactgactggaagcatgaatagaactaaaggcttccagaca  
tggatattgtcaagtcgttttgggtgaggttagatggcaacatccactacaggtcttcagagatcaaccagcttcttcttcttggcaagaattg  
tctttattaataatgtttttaaaggtttatttattctgagtttataactagtggtgataaattgaagctctgcagactgggttaattgggtt  
attactattgaccaaacagttcgtagaaaagtagacagctcagtttctcaataaataaagcttctttagtaaaagatacaaatgacatcaa  
gtaaccaagtttcatgaaacacgaaaatgatgatacattatataacttcattagtagaaagattgaggaatgcattgatggaaccagcct  
tgaattgttgggcaacttggaaacaaagaaaagtaaccaagattaaaaaactagagggtatgaacgaatatacaaaaattaaagaagggg  
tttggagaagattccttctaagatttgaaaaaggtataaaacgaaaaaatgggtatagaagcgaagcctcgataagtaagataga  
gggtgtagagccgatgaaactaatggcttgaatctttattaggtccaacttggcaaagcaatgtccaaggacatgaatttcgctagaga  
aaatcgtagcatagaaacagcatgagaggaagtcatacttttaaccttgaagttttataaaccaaatagggcaacaaaggatagaaga  
atatggatgaaagaaaaacacgctataattaccgacgagactaaataaagggacaagtaggcagtcattataaggacaagagtcagagc  
atatcagcataaaacgagtaaaactgaaatattagttatcaacaaaaaatgcaacggtttggaaaagaagcttacgtgaatgtatttc  
gaaaatggggaacagcgaacaaatgaacggcagaaagaacgaagaaaaagacatgtatcgatctatccaaacgagaagccaggaccac  
ggaagcgctaaagcggttgggataaagaatttgaagcttaggtatataaagtttagcgagggaagactccatgtttataacttacgtac  
gtgtggtgaatactatccacagagtactcatgaaagaatatttagcgagaacagccatacggcgatggccaaacggagtcctcagaagta  
gattttgtgagagacatgagaatcggggataaacaacgagggtgaaggacaattaagatacaagactttattaggccagcataattgaggaag  
gatctactttggcagcgttctcaacaccaaactccagagtataaaagcacctacagcgcttaccattgatcatcccgcgattccgcaagac  
agctgttctgtgaattcaacaaagacggcaataaatatcatcacacttgataaatgctgagaaatcggttaggtgtcagctactagcacca  
aaaatcagttacctgaatgtaacatttctgctgcaaacacttaaaaaggactgatcaatagttgtcgggataattttgttctcctcaaggact  
ttttcaaggttttactgtgcaattctctcttcttcttgggttctgcatacggatctacaacaatgacggaagcatttttaggtgctggtg  
cagcgcagatgtcttccatagattctagcttttatttttaccatgtaccattataatttagacaaaatttctttagaatgaatcccaccaggc  
atagagctgaagcgttagaggactcgttgaaggcttctgtatatgggaatgggaaaggaggtagggttaccagaagaaagatgaagatgaaa  
cacaagcaagattatgttgaattgttcttttactatcttctgtcgttattcttttattcttttgccttctctagagagtactgaac  
cgtttccctttagtcttactaccaagtagcttctcaagtttaattttgtggatttacatctattttgttttataaaagtaagattgatatc  
aaagggttactgagcgttacggattgaattgatttctgtgaaaattaccatgtaacaaacaagtaataaataaacagttgggtgttgaa  
caataaagtgatttcttggcttattcttattggcaggttctgaacattcagaaaggaggaaattgggatttcttggcagataattgtttat  
acaagaaaaagcgacttttagttcagatagattatcagtcagtagaataacgttcatcagaaatagtaatttaggggacgaatatacata  
aaaccgttatttctgttttattcttattgttttatactattttttttgatatacattcattccattaatggaatattttgtaaaggagaa  
atcactactttaagtgatttctgctttccctgaacgcgctatttaattttcccttaattttgtagccagaaaaacaaagacagaatttg  
taataatataagctattctggttctcttcttcttgaagaaattttgatattgttagtaccacgttaaaaaaaaaaaaaagcagagcaaa  
ataggtagtcttgggaacatattgtttcatcctaaactgttaaagttatggaggagacacgcggattgaagaaaaacgagaaagcaaa

aagtttgtctacaatatgtgatgaatcgaactttcggagttgatgaggatgtagtacaaggcctgattcatgattatgttggtagtcagcatcac  
tgagtcaaaactatgaatgaaatcaacaaaaacattcacaattacgactttaaagcttcaaaaaattcaagaccagctcgaaggccgaccgacatg  
gcattttcaaaatctatctggtgaccctgttcgcaaattggccacacacattatcgacgaaccaaattgaactgatgcgaagaattatcgattggatt  
atgcaagctgacgagatcagtaactcagataactcagattcacaagatgacgacgggacatgctcgtggctccctctattattgaaaac  
tacttgagcacttttgaagagatgggttgatcaacgcaagggatggacattcacaacatgcatggcagacatggaggcttacct  
acataatgagatgaaagtactctacgagtgatgcttgcggtatgacagcggtatgtgaatggaaagtacacagagcgaccaaaa  
ctgacttacgttataggctatgttgcgaatgtgatattgttgcattgattgttgcacaacattggcctatgagtcgctccaactgcagca  
ctaattggacagaagctacaacgattggaagatggtaactaatgggaaagagaatttctatgcatatcaccttttcaaaacaggatagacgaaa  
aaaaaaaaataagttctgtaaggaagtgcacaaggactatcgaactaactaataactcataaaaaatcatgagaatttgaaaaagacat  
agagaggaggaagagagtaaaactgttcaaaatgaaatcatctctttatggaatataattcttttcaaaattatggtatggagaatagctgcta  
aatttcttgggtctctcctaaggaaatgggacccagggttaagaataactatttcttccaaaaaataagatttaattcattcaacaaga  
aaagaaccaagatccaaaacatcacattggacaacgaatcattggtttcttattaagcaaatctgcaatccaaagcttcttactctttgatga  
cagccaacaattcatgatcacgatagaggctatattcctctgcacaacttaattgttccaccaaaagcaggtaacaagacacggctcctg  
gggtcacactaggagagagagagttcctgtttgtcaacatgcccttccggtagcgataacgcgaccttccgacaactttcaaggcttcttc  
aggtaagaaaataccagaagcggcttgggtcagccttgaccgttgaacaaggatacgatccaaaagggaacgatagactttgcgctcttc  
aacttagtagcattgatgtgtgggattgttttcttcttaacttccacttcaagtggttgaattgcttgggttagaactgttaaaacgaatcga  
aaagacactcgaatcttctgtatttcttagttgttttggcaggttgcataatccgcatcttctctcttctctcttctttaaagcattttgcaa  
accatctgaaaaattcgagcatgaaccatttagcgaatcgtaaccctgttcttctctctcaatgctttcatataccgatccaatgagtgc  
tcttattgtttaaactcccatctttaaacgatttaccgcttctcgataaaaataagtaacgagacagaaggatgcggtatttgggttctttc  
gatgaagtaagaggaagaggaacaaagacaaggttactgcgtcgatagataaacgttgaataggagaggagctgatcattacgaca  
acttggaggaggggtgacggctacctaccattacgtatatcacctgaaagaaaataagcatgggataggatattagccgaatcgttaatt  
tagttccaatcaaggagataaactgccacgggtgcagcaaaaacgattcggcaagagccatgggaggttgggtggagcagtggaatcaaa  
cacataaatgaagtagatcggtcgttctgttcttgaataatgatgataagggtgaccaattctttatcaagttccccgggaaaagatacggc  
aataatggtataaagaaagcatagagtcgaatacgaattcattcatcattgttttgttaagggttgcctcgtactttaggtcgttctttgagatcca  
ttgggtgatcttaacgtttctgttttattgttggtaactcttaattttacttcttaactgcttcttcttcttctttacatactttgaaacga  
aacaacatctcataatcatgactatccaatgggaacagattgctgtaataatagtgctcatcgcatagcagattccttctttatgaagctga  
aaaccattcctataaagaagtaacttaacgttacgaatgtactctacttgggttcttctctcttagggaacttgagtgaccgagaaatga  
cgctactgcattggccgatcttataaagagcgcaaaactacaagttagagttggtaacggcgttttcaaactgcccgtcgtcgccagcagtt  
actgaattgcgtaaacgaattgttctgatgaagccctcgaacaagctacaaactcgcgaacattatgccaagacaggcgaactagttggtc  
ctctgatggcattcctgtttctgtaaaggaacacatatgtgtcaaaggacataccgcaacagctagcttttagccaaagctgaagtgatgccg  
aagaggagcagatattgtgaaacaattcgtaaagctgggggttttattctgtcgcactccccaacctcaatcaattatgcaattgaaacctc  
tagcaatttaataggcgtcactgtgaacccttaatcgaaaactcactcctgggtgcttctcaggcggagaaggtgcactttggggatccgagct  
tctgtcctaggcattggcagtgatattggaggctcagctcctccagccgcaaaataggtctcttgggtaccgtccttccacattgcgctgtcc  
cgaagggtgtcaaggagctgattgggacaagaatccattctgtgtcgttggcttggcacaacagtgtcgtgactgaaatttattatgaa  
tactgtatcttagtaagccttgggtgaatgatcttctgctaccattcctggcgtaatccgacttccgccaagatgagaatagggtgta  
tacgtagcgaataaggtggtagctcctcagcctcgttcaaagacatcgaatgggtcattgacaactgagaatctcccaagttgaaactc  
tcgatgtcgagccaatggaacataaatctggtggaaactatcagtgagcttacttcttggatggcgggaaagtgtactatgattgttgc  
ggggggcagccatagagcattgacagaatggatctgaaatcagccagtaagaagaaccacgataggtcgtggttggaaagctcgtaac  
gaactgagcctaccgcaataagatacgaagatttacagctcctacggagtcgacttaattgtgtcctgctggacctggctcccacccaaa  
ctaggagaagcgaagattggacctacacttctgtctggaacttctggatctccctcctgctgtttccctgtgacgaaagtgatccaggttag  
atgtaaaggatgaatcttatgagccatgaatgatgaagacgcttccactatcaaacgtataatcctgaggactacaagatgctccagttagtt  
tgcaactcgttggtaaacgttgggacgatgagaattgtctagcggctctgagaaggttgggagacactttaaagttgtataatgactatcgttg  
gagatgtattatattgatattatgatatttactgtatatagaatgatttggatagaaagtaataatgtttagtaattatataatcaaaacaatc  
tcaatgtaacgactcattcataagtgatttcttcttattaacaatatactgtaggtgaaagaaaattggaattcaacaaaaataatgtaa  
atgttggagggtcgactactcaatcatgtcgaagtaaggtatgtactaaaacgaatattttattgattcttttcaaaactaaagag  
atatgtacgctttatagacttcttcttattattaatgattgattcatgaattgttgtttacataattatgtaatgattacagtagggaaatc  
agcattggcagttgtttcaagaagcgttacttcttataactatcatataaggaatggatgaaccgatattcttcaaaattaccgtaattcat  
gttactgaaattcaactcttgggcatacaaatcaacgttgcccgctcgccatgatttccgggcaaaaatgaaatgaccgatgcgactcattgccc

ttcctaacaggtacagattgcgtaaacttaagcgtcttatggaatgtttcctaaaggtaggatggtttgaaaaagagatatatatatatataggt  
tctatgttgaattgattacagcctcaattgaaggttcaagaataaaaagtcagtggaagtttgagttgaaaaaggtcatatcttgaattttcgc  
tatcaattctttgttttccctattgagattattgttgaacttcataattgaaaaaaacccggtcatttgagactcaattaccggttgtgttt  
gtatctatagtttactaaatattcagatggctgctcagcgtgtgaaagcaaaagattacagaaaggcagcttctgtctggggaagcctttac  
gacgaccagtttgtttatattatgtcattgcagttatgaccagcagtacaggaagtgctacagggaatgatggagtacatagtgatgctcat  
attatgcgcggcattgtttgcaagtggatgatttctctgggtttcctatggatggggcctggtaataacatggacgattggactcaattgtacg  
aagcggcatgtggcgttgaactatcagctagattcagaaggcgcgaacggttctccgagaatttctctatttctcatgatacaaaaggccgaa  
attcttcagcaacgagatgactcttctggtagctacgttggatcaaacgaaatagcaaggaaagggatgcttcgcaaacttatccaa  
ccaattatggacgttgacgaccagcagaaccttctataatttggagtctagtcacctcacaatcgagctattatgaacatttggcttcgct  
caagaaaacgatttattgaagcgtgacacttctcagattccccttgaatcatggtacgtgaagcagatacttttgacttcggacacgaaacc  
gaaaaactcgactagcaatcctgctagcatttctgataatgtaaatgtacagcttctattcctgcagcttatgttgtaagatttccgttcgcttc  
gaccatgtttgatttacacttctatggctttaaactcattgtattttatatattcttggactttatcaccgtaaacaaagaaattttgttctctc  
tacatcttattgctttagcactgtacaacatagcatccttggagaagattcaataaatgctctcctcaaaatgtcagttataacttcttact  
tcatgatccttgatgacgattataacactaacgtttgtatttaccgcatatagtcattgtatactgtacactgactgttccctaaactgaacaaaggt  
tcggttcgacaggcgaagaaataacgccaacaattgattcattttatgaaggtgaaattgattgacttttcttttggttatataataggct  
tccaattgtactttatactattttaaacttatttctctaatctcgcaatacgggccattggactttattataggaatacactattcgttc  
atatatttctccttttttggcgaattatgtctgtatacaggctcattactctccgagaaaaactcctcgagtaaacagatcagatctacaggg  
tccgaattgtagatattcctctaaagatatgctttggattgccttggtatgcatgctgagtagcattgtttttacatggctgattattctctacc  
cacggcctacccttgatgctcagtgctgctggcttttctggttaccagatgacggaaattgaagacgaggaatctaggaaagattctctag  
taaggaaagcgaagaaagcaaaaaggcatcgatgaaactggttcggaatcagcgcgttcaaccacagaatccgatgaacaggccgttcacgt  
tgattctgatttgaagaagaggagcccagtaagtaattcctggtcttactactacaaggtagggtggctcatggaaaaaggcgcaccacgg  
gcgcagaagactgcatacaacaagcgtttgtatctcataaggcgaagaaaaagccacaagatctgacagtataggtcaggaagtacagg  
aaggaaaagctccattaggtgaagattatctgcataaaattggcagattatctatctcaaaaattgtgacggatcacttaattcgaagaaagatt  
accctgttgaacttctcagaagatcaataaaggaccgatattctgtaactcatcaactggtcccactttgtcggatgcctatcttgagcccgttca  
ccattgtatcagatcattagaatcaatacttattcttagttatctgcccttttaacagctgcctttatttttgcctcccaccaagccgtgtt  
tatttctttcagacaatagtgcttgatggcattcccctctatgaaagcgttttctgctgatttctcgaatctccatctcagctcactttcagaa  
aaattcgtatttgggaaaattgaagtcagggaggaagaagatgaaaccttattgaacgagcccacatctgttctggagacgtttcagacaagg  
aaccaaaagatactgactagtagccttctgctgaaagcattgaaaaaaagcgtgtcccttcgaaaaaggagattacttctacagaaagcaatgg  
aatgaaaatagtagcggaaaaatctatacctgattgagcatcagcgatactgggttgggttggctggttgaatcggaattaccaactgacc  
atcctaattcacaagcttagacagaatattctgtagcagaacctaccgctcagctcttacctccagacgggattgcttggatcgacgacaagt  
ggtcaattggtccttgacatatacggatacttttggagacaaccttcttaacacagtagcaggacggcattttagagattcagagaatggagaa  
gaaggtatcgtatattaccgaggaatctgtcactctgtgccggagccgttatcatctgagaaaggactagatgatgaacaagttgtcacttaa  
acaacacaaacagtagcaagcgaactacgaaacccaatcaaagactgaggtaatttaaacgtataatgaatgagaatctacctgctactaa  
gtcacggcttcccagcttcttcaagatgataattctttttgggagttgaaaacaacaaagaaaatagtgcaagtcctagttctctaac  
gatgaataactaatcaaaattttagaattttccagaatcgctaaaagcttctacacagaaacgacaaaaaagaaaccaagataaaaaaat  
gccgctattctaactataaaaaagtttaaaacaagattcacgttataaacaacaaactctggatgaaagatgattaacggattcaagtacc  
gttcagcgtacttctagtataaaaaggaccataattttaccttttttttttccattgttaattgttctattcactacaggtataatctaat  
gtattttcccagacacctaggaatctttaccttaagctttctcccttactaagccaaaaaaaagttcacgataacgaagtaaaaaatagaca  
tgatgtaactatgaacgggaaattacttctcgtctccgaaaaagtagcagcactcaagggcaatttttagccaactggatcattaaaagttcgctt  
gtgacataacctgtgacttgccggcgaattttcatgggttaacaaataaaatagagtggtcgaattgaaagaaaatcgccaagctgaggc  
caattacaagaagcctatcatgtgatttatctttaagatttatttataaaacaggtcggcttgaagacacttaatttaccttagagacgaagtc  
ctaagaaggctataaagtattctgtgcaactgaaagaattttataaaggaaatataataaagaaaatgcagacgaacgttacaactc  
gtcaaaatgaaataattgctgctcgtcagtgctgacaataacatcttcatggaggccaatgcgtgcagcctcaaggagctgatccaaagacc  
attcccttgataaatcctgctacagaagaggtgattggaacatgacgagatgcttctgccaagatgtaacaatgctgtcgaaacgctcacga  
agcattcgaatccggcatctggtccaagcgtagcggaaatgaacgtggagccatttctcgaagattggctcagcttatgcggaacaccgagagt  
tgcttctggttggatgtttgaaactgcggttaagcccactcatatgcctattttagatgtagattcctccgagactactagattattatccgaaa  
ttgctgagaatgatgaggtactagaattgtcccttaacaaatgctcctggttacgtcggtaaaagaaaagcgtttcccagaggtgtcgtcggtgt  
tattactccttggaaactttccattgaaaatggccttttgaagtcattcctcctggcgtctggttaactgtgttcttaagccctcggaagtcgc

tccttgctcctgcctcgagtttgcctattgtgcaaagaaggcggctgcccacggcgtttcaacgtggttattggatccggcaaagagaccggt  
gttgctcttagccaccatgataagattgctatctcgcctttacaggtctttgttcacaggcaagaaaattatgcatgcagcctccgaccacgttat  
tcccgttactcttgagttgggtgtaaatctccttaacatctgtaaagatgccgatctttctcgttgtaaatccgctgctatggattttctca  
atcaagggtgaagcttgactgcggcctcacgtctattaattgaggaagatgtgatgaggaggatcaaaaggcgtcattgaagaagcaaagaa  
aatcgtcactggaaatggtttagaaaacaatgtcaacatgggtccttagtaagcaaacccaatatgaaaagggtggttaattgatccaacag  
gttttgacgaaggcttaagtgtgtttgggtgattacctaactgatggaaaagggtattttgtccctcctacaatattaccaatgtgaaacc  
gaacatactttatggaaagaggaagtgtttggccccgtttgatcaccaagactttcgaacgaaagaagaagctctaaattagccaatgctact  
gagtatggcttgatcaggcgtattctcaaggatcgtgctactcttgattactttgccgacaatattgaggcaggaatgtgtccctgaacactta  
tcactttccagtcatgaactccatggatcggttggaaagcattccggttgggaataggtttggctactcatggttactatgagtatacgcgttga  
agcaagttccgagtagctcggcactgcttaggatcgtaaaggcatgaagggtatctgtttaaaaaactcatggattgttaaaaaaaaatg  
tcaaggttaatgaatggaatgatattcatgattatatacactatcgcgatagtggttgaatagatgaagaactcatgagtagtaagtaggc  
tacaanaagtcgagtcgtaatgaagacgtatctgcaaaggcaggattagattgagtagcgtagacgataaacacgcaaaatacaatgagaa  
aaaaactaaatcccaatccaataaggaattggggataaaaatgcatctaccagggatcgaacctgggaccgtctcgaacatcatgt  
aaagcagaaatcataaccactagactacagatgcttctgttaagtaggagttgtatatacacatagcgcgatgaatgctgaatcgtaaaattt  
agttgctggaaaataatcaatatgtaaaacagccaagcttttaacatctaatacactacattatagcagtcgacatgatttcattccttgat  
ttacgaaaaaaaggaacgaatcaagatactactctgaaagggttcgtatgttatcaaaaaaatgtttactttttgtgccataaaaaat  
aataatctattactagtcagttcaatggataggtattttatataacgaatcgcaacacagagtcctaatcgtatagtaacatacaaacgctc  
gtaatgattttaaagcattagatcgtttgtccttaaagcactacagaaaggaatcaaaaattgtcatttgctcaaccacactgaactaaaa  
tccgcaaatctaaccttagcctttgtggtcctggacaaatgcaaaatgctttgggtgagcattttgacgcgacgcttaacgcggaccacaatac  
acgtactcgagctgaactgtcttaaagcaattggaaaaagaacctaatttttttggctgttctcagctgctaagtgatcagagaattgctcttc  
ccaccagcaagctgtaagctcaataaagcaactatgattttgggacgtaaacgtagctaaccaagattttagctgaatttacttaaaaa  
cagaattgctcgttctggacgacagttgatgatccccttcttactagatatacctgaagagcaaaaggccctcttcgcaaaaccttctcgg  
ttctgttcaaagccaatatttacgaggtctcatttaaggcatataaacattatcctttccacagatttccctgatcagtgccggcgtttagtg  
agttcacggccaatctgttcaatctaagtagcagtgaggtatacgcaggcttaattgcttcatgaactttcaaaagtacagatggcgttt  
agatgaccgcaacgcgatacgggcttataatccgctgttttcaattattctcaaatagtcacaattgataaataatggaagacaacgac  
tctccgaaatgcttctctatcttaaaaaacatttaagctgtcattgcgttagaactcctccgaattgctcgaatgacatgatcctgtggtg  
attcaactctttggctgttgttcaaaagccattgcccagtcggttatggccctgattccgaagtgcgacagccatggtggcataaatgcaa  
gaagtgggcactatcttgaatcgtattttaccgataaggagaacctagttcgtttacggagaatctgcaacaataaccgcaattttgcc  
aaaaatttatcgcaatattgtccctagcatcttgagacatattacaacaacacggttatgggcacaaggtcaattatggcttctcctcgca  
tattgtatttctgtgttctctacgaagaatcgtaaagccaagagtagctggcagcttttacagcctcatctgcgattgttgattggtgatttg  
ttttctcaactatgcatgaatgaagaggacgaggaattatgggaactgatcccgtagaattttcataaatacatcgaatattatgatgacttc  
aattccgctgatgttgcttctcgtttctgttcgattggccttaagaggaaaaagcacacctcatgggcatttaacttttgctagtgatgctt  
tgaaccaatagctgcttctcctcaaacgagaagaacctagacaaaaagaaggcgtcttcgtatggttgggctgttttaattccatccttag  
caagaactcctggtgctggtatgatgcaagagttctgttgctatgtagtcctgagtttactagtcctgttggttatttaagatctcgcgatgt  
gaaatgattaaccgcttagcgagattactggaatgacaatctcagctctgatcgtttaccattcagtgcttaactgtctacaagactcggatg  
gcctgtacgagtagaagctcctggccttacaacctcttatgctcatgctgaagtacgacggttatgacggcccagctactactataatgcaa  
aatctttattctggcaaatgaaattgacattgatgctttatctcctcatggaagaattcgttagttccttcagccagagtaactccttcgctg  
ctcaactggtaagcaactcgtgatacttcttaagttatgcaagaaagtattgagcagtaaaactcgcgaagattttgacactttgggga  
tgataaatctattgctgctattggcatctgaatacctaagtagctatgattttgagcctcgaaaactggtgacgtttgagagaaattgaagtaa  
ttctttactattattagtttcttttagacaacaacattttgacgtttttgctgaaatgtttgaataattgatggtgtactttgctcaaaagaa  
atctcccctgtgatgtggagcgtatataaaaagctcacgggttctaaaggagctggcattgaattgttgaagatgccactcctgctttaaagca  
attttattctatggcgtaagaattgtgacagccctgactatattgctgctatggtggatatttttaacagcttcaacagtgatcattgg  
ctgtaatgaccgtattgctgcttcaaacatagagttgctcatgcttaattatcgtggcttctagaccaatatttctactttatcgaattg  
ccgtaacctactcctagttagtgaaaaaccaactcacaatatatcgcgtcttttatgtgaagttatcattaacgcttgtactataacctggc  
atgactctgggcttctcaaatgaccaatggacggctcctttcttccatgtggtttaaaggatattgcctccttactcgcgtgatgacaagaa  
gctttgttagttgctattttgtctatgattccctttagctgaacaggtcgtttggcattgcaagaaattggaaccaagtcagaaagtaattat  
ttttgctgaaaacattactgatgactagcagctcgtgctgaattgaaaaagaatacagtggggaaacattcaatcttctagctcgtggtg  
aatgatggaattgactgggaagctgatgaagatgatggtgttgatgacttcgctgctgaatatgaaggtcctgatttagaaggggatgctcctggt

gaggttgccgatgaactggatgatttcgaacggtatcaaggaattatcttctagacgaggatcctttattccatacttctcttgaccaaattgagcc  
cttctccctttccaagaattatggtacaccttaaggataacagtcctatagtaatgcaggatagataaaggatcttaatgctgaggagcaaca  
atcactccaaacattgggtactgaactaccagctgtgctcgtcctccgctgcttctaccaacagtaattcttgaagttctagtgaaattgaacta  
aaacaaaaattgggtccttgggtatcgaaaaattatthaattatagtgcttcaaaagttcaaatgggttttcagctctttgttgactgtattaac  
gcaaagcctaattacctttgttcatctctggtaaatttggctactgctgatggaagtagaagattaagaaaattctttcatctaattcaattca  
attactctccttgaatattaaataatgcaagtaacatgatatgaatataatggagtagatcatcgttaaggagctgtatttctctttgattttattt  
tatctacaaaaagggaaacagtaattcaaaccaaaacacccattcttagtacaacaaatgctgccacctttccaccttcaactggttctaattgtt  
atgtaaggcaccactaccaccaagcattagtgactcagaacaattcaatccgcatgaatcatggggctaccttccaaaacaattgtattagat  
aatggtgcttatactgtgaaagcaggatttctgatcggaatgttctgtaagtaaaagcaaagtaacgtagttagttgatcgttaagacttagtatct  
ctaatttgcgttttagagaaataccaactgccttacacggctcaaaaggtggaaccgctgttttaggagacgagttgtcgaattgtaattgattt  
accacttgcgaattcgtagagcgtatgaaaagtagtataaagccttgcattcagagagagcttctgagtaggcaaaaaatgcaatttctat  
gaatttactaaacataaaggatattctgtactgtagtacagagacagcggttgggatcaagtgatgcgacggttgggattactgagcct  
agtatggacggtcattcattaacctaacacaggctccattcacgatgcatctatagaacttaacacaattcagctaattttgaagaattcgggt  
tcgatgcgtattttacatgtacgccggcagaattaattccatgggatcatgattgcttcaaaaaggcagcaaaacttctacaaaaatacacacg  
gcgaatgtgttttagttattgattctggttatagttttacccatataatccctgctattgattctcgaatacaagaaaatgctgtacaaagaattgatg  
ttggaggcaggttttgaccaactattaaaagaagttatttctatcgaataataacatgatggaggagacatatttaataatgaaataaaag  
aatcggtatgctttgtctccaaaacttgcgaagacttgccttgcacagacaaagccaaaatcgaagcagacatcctttatgctaccag  
actacagttctgtaagtttgacatgtatgcaagactgaaacaaagttatcgaccagcaggtataaaaactgccaatgagcgttaccactc  
ctgaactcttatttctcctgctgatgttgggttgcaggaagctggcattcctgaagcagttatgcaaaagcgtacaaggttttcagaagaatcgcg  
gccatgctttagtaataatcgttaccataggaggaagttgaaattccagggtttcatcagcagattggaagctgactacgctcgttccaccag  
aagatatagagcttctgttttcaaccgtctaaagtaagtttttccatagtactttgactaaacctgttctagtcacatgatgcttggaaat  
cgtggagcccacatgcctattgaatactggaatacaaatagtttccaagtcagaataatcttgaacatggtcctaataatataatagaaggaaa  
aagttatgaagttacgaaaaggttctaaaaattcattgcattcaataaagattgccagttgcaattattactactattgttactactgttttaacc  
actgacctcactatcacgctttttattattcatttcaattatccattttcattgttctgtaaaatctatataatctattgttactctacactgtagat  
gtattcaacataaatcttctgtacttcatactcaaaaaacaattcacctaaaagattagttataagttcaagataattaattacggtgaagcaaca  
tttgatcagtggtgaatacgtataaaccatgggattgtctcaagactaatcgatttttaacatcatttcatgttactgatggacattataataca  
taccgattcaaatataatagcaactgcagaggaatctcaaaagattcctcgtgtgtgtcgtaaatgttgcatatggtaaaaggatgaag  
aaaaacgattgttgaaactattgaatttaccagcccaaaagcagtcacggcacaatcgtgaagaagaatgtaaaacaaacgacgagcgcgctc  
aatccaccatcgatataagtgtaatgagagtaaaattataatcgttataggaactatagtaattcatgaaatgaattatattgtcattcct  
tttcataggtttccgtgtatagttcaagaatgcttaatgcctatgtaagattaccctacaaaataaatacaaaagctaatgaaataacattt  
acaattaggagcttctcaaaacttgttacctcatgtgtctactgtatgtacgaagggttctgtactatacaactctagctctccactaccacca  
ccattcaaacataaacaataaagaagcacctaaactggcacatataccaggggatatttgtgtcattttataaaagagatcaaaatcttta  
tgactttgaaagatgcccttgcacctcgatcagcaaatataattcccagaacatgaaggtgtggtgaagcagaagccgcttattggca  
gaggatgctcctggtgaacaaaaaggctcgtactttagaggagagtgtttcttcaacgaagatgaaataaataatgagaattcggtactac  
gacaccgaagcatcagaaggttactactccaaatcttaccggaagtcagtaaaacgagttaaacatgatgaatctatactaaagaagttcctc  
atatgaaggcacttgcctatcgatgaagagcaaaaaacactggagctgatactacaaaactagccacagcaaaagtcgaccttcaaaaag  
ctaagttgctggaatggaagcagcagataaaaaaggcatttcaaaacttctgttttatttagatgggtttgacctaaccttcagcaacgagtcaa  
acgtcaagtagttcaattagggggccacgtggagacctttttctgtaatgttactcatgtggttacgacgagatctacgcaagacataatggca  
aaaaactcaagcaggacgtgcttaccaaaggcacgtcaattgaaatgaagattggagcatggaaaaactgtgaaccgggttcttaaaacgct  
tttgaagacgacccatttggctgctggccatctcaaaagcaagggaacgatttaagttatttgccttacgtagaaaaggttcaaggtaccaatga  
gcgtgatttatctgtaccaaggcaagacttgttcttcaaaaggccatatactatgttcatgatatggcaaatgtataaaacctattctttgag  
agaatggccaaagccgtcaagcgataaggatgttccgtggcccagtttctgtcaactagtagtagcagatgccattgtacctgaaaacaagc  
agcgcctaagtattaacgcacacacggcagcagcagctgcagcaaaaggccaaacaagatcagtcacaagaacagcagcagctgcagcgc  
atacaaaaacagtggtccaacaagcacctccaacgctttcacgtgctaattctttaaactctgttccattgtctatcaacaactgttttact  
tcgaactcaaacagtgatataatgtaatgccaaagtgctccattgcaaaatgcaaaactggagatattcaacaagagcaaccttcggccaaact  
taagccatatacgtatgtagatggtgatgcaagcttctggtatcgtccagttcaactcaactcggcggtaatgtccaataattctaattcgtt  
cagggagtgctgcaggtgtcctgttggctgatcaacgggagacataaatgagcttaagaaaagaataattcagcaaaaatccggagcacc  
aataaagaacagacttacaagaacatactcagaatgtaaacagagaaaaagttaggattgacccaaaactggatattgtgaaaactgtcg

agaaaagttgacaatttcgaattgcatattcggagtaggcgcatcggaatttctgagaatgatgaaaatttaagaattggatgaactatt  
tgagcttgttcaacggcctttctgaccactaagaacctcaatattgtttatctaaacatttatgccatttttttagtctgggttagagtttctcgctt  
ttctgtgttttaattgtgtggaacttttaattctgaattgaaacagaatgattgcgttgaagttttacatcggtgctttgctgattctctttttta  
catgcattcattctttttcttaataatataatatacctatttctgatctaacagcggttacgattctatctctgtgatttaacaaacctctatctt  
tcaagatttaacgaacgatttatctatcttttcttttaaatgaatattgggattattcataggatgctatgaaggattacaatccttatttggcaattg  
acttttgatggcaaaagtcagcgtacaattacatgctcattttattgtggcatgtttcatagctgaaaggcaatatactgtatctattgcatat  
gcaggcaattaggaagagtctcgtgtagagacaactttgatgataagtactttgaagtatcgagagtagtaagttgtatcactttgtattttgt  
agcttctgtgtttgtaggtacctcagtaaaacagattttaagaactttatggacttacaagaaaaacaaatgaatatcgtagtataaga  
aggaaacctaggatttttgttaacgttgcgaaggatgaaatgtgacagaacgctatcagtcgctattccggtacaccagaagtataggaaca  
tcaaacagactaaggcttgcctgaacgaatatcttagtcgacgcgactttattcttagacattattgcttgaacaacacgagtagcagctgtt  
aagttttactctttcttactcaacgtatagcgtcttgacgctcaaaagaaagcagtgtaaaagtaatacagctcataaagaatattcgac  
ataatctcacttggagtcacaataatctgtattttcactcttaaccagtcaatctcttattgaatacactttctggaacctgattatggaaaatctc  
tttacttccgaacaattccatgactcgaacaatctgaagtcacaatacctccgagcttccaactgacggtaatgaagataaaaggta  
caatacgtaggattactcgttcaatgattccgaaatcaatgggtggaagcatgaaagcttagacaatgcgactacgactgttacttaccggaa  
gaaaccgaaaatcttctccttctgctttattacaaaagaagcatgaggttgaaggttattctaaggaaaagcctgcttcatcaagaccgatc  
caaaaaccattattgatgtccactcagaggctgtttccctacccttccccaaggctcagctctagtagacaaaaactcgtcttgggtccgaa  
aggcagctgggttagttcagccgtaatgatgggtgcccttctcagctgactcagctacttctcaacaggactgcttctgcttcaagagaaac  
agattatgacagacactttgattttgggacctgatcagcagatgtctcgcctctcgttaccggtaaacaaactcagttgcagatattgtacgt  
accattatgcagaaaacttactcgtataaacgtctcaaccgcatcaagacaaaaagcactaccttctaattcaagtaaaagttgcttctgtta  
aggctgccacagacaaaataaaggccgtcggtcgtcgaacaccattattgtccctgccctgctttgttgcggcgtgttatcggtacca  
cggtcagaatctaaagaccattatggatcgtactggcactcgtattcaagtcctaagcgtactcctcgcactgacgataatgaaacatcttct  
aagaatgaaaagtcctcctcctcgttcttggacgaattagaacctcaatacagagctgacttccgttaccatcgaaggcgattttgaag  
gtgtgactcgcgaaaaagaggtggaacaatcattaatgaacgcactagtatactactgtccgattaatacattcccactgatttgcata  
acttctcgtggagccgatgggtcgaatattgccgaattggaagaaggcaagatctaaagttcaaatccatttgcatactccgacaacaatt  
gccctcaatccagttgtcttctctgtgaaaagcttctgttctgtaattgtctcttttctacaaggaaaagccgaggagtagctcgcactacca  
ttcctactatgattctgtccctcgtcgtcaacatcgtttatcaacggagaaaagagtaggtattcaagatatctaaagaagcactggatgttca  
gtatacttctccaattaatagcgattcagatattgtcagttctgtggtcctgcaatgaatattagtgatggattaaagatgactatggagcgtgc  
taacttcaaatgttgatgctgttaattttccactgtcttcaacttcttgaagatccctcagccatgctaatttcttgcagatttttcattcgt  
ccaagttctgtcctaatagaaaacgctttaaattgtcagtttcatcttccgaagcgcgaagagctccaggaacctgccaataatctgtcataat  
cgagattccagtaaagccgctgaaagcgttcgaatgctcgtgctacgtaactaaggtattagcaattccctcctcataaattccataatgttg  
agattgatcctctgttcaacgttacgttattgggttctaaaggtaaaaacttcaaaaactcagagcggatcatagcgttagctattaattggcga  
aatgggtgaaaatgattccaatgtcattcttctatactgggttgatgacggaaagtctcctgaacaggtacaagaagaattggcaaatctgg  
gtgaacgatcaaatcctctgccgatgctccgtaagattgttctgaaactatccaagtaccttctgtctatcataagcatattgtgggaccgaa  
gggtactacactgaaggcaattcttggtaattcagaggaaaatgtaatagttcagcttggtaaggtttcttctcgcactgacttaccgatgacgat  
gtctacgttagaggattttccaacgacgttcagcgcacacaaatgaaataaaacaactcgaagagatgcaagaatcatgagatccttcaactc  
atacgttgctgaattgttttccgctcagattcaaaagaatattattggtaaaaatggaagcaatgtgtccactcttctgaaaaacttgggtgtc  
agatcaatgtcgaggaaggacatgtacgtatccaaggtatcaaaaagaatgttgaagaaactaaagctcgattcaagctcaagctcaagctct  
catggacgataaccatttgcgcttaccatccccaatgaattccaccgccagcttattggcgcaacggaaaatacgttaaactgtagaggaaa  
aatttagtgcctgttcttccctcgtgaagatgactgaacaattccggaacgaaacgatcaagccctcatctgttgatgaaattatcattcgt  
ggtagtaagaaggctgtcgttctgctaagcaagagtttaattgaactttacagatgagaagtctattgcttatagtgaaattatagaaattccct  
ctaaggctgctccagagttgtagggcgcaatggcgctactgtagagaagattcgtgctcaatgatgtcaaaattgacattggagacgaaaga  
tctgaggtgcaattaatgtttcagtagcggttctcaagaaaatgtcgaaggtgcatcaagaaattaatgctattgtgaaagaaataaaa  
ccaagtcgagaaagttgcaaaattgatcgcaataaccatgttttctattggccctaattggaagcaactgcaagaaagtattaaacaatgtgg  
tggtacaaccgacaaagccgagactgctcgttctgttagtttctcaatggcaactcgaagaagaacgcaattctgtgtgttactgtgtaaaa  
acaactcgttgaagctctagaatctcatttcttacaactgtagaggaaactaaagaatcaagttgaaaaaactattgatgttctcagcgtagcat  
cagttctatcatcggaagaatgggaagtagccgtcgtgatatcgaagaaacattgacttcttacaattccgaatgttttagatcccagca  
acttgaacctacaaatcattgtagtcccgagaattcgacaaaagctatacagatgattcaagagaaagttgctagtcaatacacagaaacca  
ttgaggttccaatacttgtgtgaacgattgacgaatggctccgattatcagaagacttccgaatgatcttaagggtttgtggacgtgcccgact



tcgtaatcaattagaagggtcagaaaattgtccttgaggataacgaagaaggaccctatccctggaagtagttaccaagcaaaaaataccgac  
gggtttcaatattgaccattagaggttacaaagaaaatgtcaaaaggccattattgcttggagaagaacattaagcaggttgaagaagaatg  
cactgggtacctttctgtcctccaaactgcatcgtcgtattattgggtgctggcgctctgttattaacaagattcgaaggttgcctcaagtga  
tgacgttccctgctgatttaggtgctgataattattgtcattcaaggaagtaactctggagctgctaaagcaaaagatttaatttgaacgctta  
agtctcaagattaaagaaagaaaaatTTTTGACATGCTATTTATACTCCTTCCCTTATGGGAAATTTTCACTTATGCAGCTAGAAACCCAT  
TATTCGTGTATATCAATCATGTTGCTACTCTTTTCTACTATTTGCTTAGTATGGGCGAAGTTTATAGTCCTTAATTACGTTGCAAGAATTAATTT  
GTTTCATCCAGCTCAAAAGTGAATCTGAGAAGCTAATGTTCTTTAAGTGACTTCTGCTGAATGAGATGAAGCTTAGAAGTACTATATAATGTT  
AATTAATTTCACTTAGATAATCACTTTAATGAGTTAATTGAAGTGAAGTAAAGACCAAAAGATACATAAACTAAAAATGCTTTAT  
TATGGGAGTATTTAAATTTTATAAAGCTCCTAAAACAGTCAACCATCAGTGTCTTCGATTAGGAAAAACCAAGACCAACCGACAACATAT  
CATAGACAGACCAGTACCAGTACAAAGCTATAACAAAAATGTTCTTTCTTCTGGGGGTTTTTTTTGCTTTCATAACAAGATTGTA  
CAAGACGAAATGATACCAAGAAATTATGCAGAAGTGGATCCGATAGTGTGCTCGTGTATTCTGTAAGCAATTTAGTAAAGAAAGCCTCT  
TCTTCTACGGTCTTGGAAATGTTTGATATGAGAGGACTATAATCTTCTCCGCTCTGGACACCAGCAAGACTAGTCTCTACAGCGGATTACGA  
GCCAATGCTTCCACTCATAGCATGCTGGTACATTTGATGAAGTCTGCACCGTCAACACAGCGTAGTAGTGGAGGACGAATTTTGAC  
GGAAATAACGAGATAAAGACGATGACCAGCACGAGCACCAGGAGGAGGTTGAAGCTGCTACTTTCAGCTATAGTACTCTACCCATCTAA  
GCTATCTACGCTGGAATCAGAATCACTGGAAGCGTCTCCAGTTTTCATGTTTTCTGCTTTTCTGCATCTACAACCTCATGGGGTTTTCTGTAATC  
AGGATAAGAAGTGGTGAATCGTAGTAATCAGCAAGTCAAGCTGCTCATCGGTATCGTAAGCAATAGAGAAATGTCCTTTGCTGCATAG  
AGAGCGAACAGCTCCAATGACTAAATGGCGATTGCTGTTAAGCAAGTGAACCTATAGAAACCTTTAGCTAAATTTGAAAAGGCCCG  
GTTCTCTACGACATATTTCTGCTCAGGAATACAGGCTGTGAATTGCTTTCATATGCTTCTGTTAGCTTCAAAAGAGGAGAAAGAACGATTGCA  
AAACAGGCAATCCCTAACTCAATTTCTGCTCACAGCTGAGCGAGCTTTTTCAAAATCTCACCGTTGGTTCAGCGGTTGTTTTGCTTGAGA  
AGTTCCGCTAGACATAGCTCATTCTTAAAGAAGAACAGAACTGAGACCGATTAGATGCCAAGCGTTTTGTTAAGTTTGAAGCTCTCTCTT  
CAGCACTTTCATGCAGGCTCTCCATTGAAAGAGTCGATGAGGTAACGCTACTGTTTCATCATGTCTCAATTGGTCTGTACGAGACTTATTCA  
AATTTACGAACATTTTCTGGTCTTCTTGAAGCTAATGGGAAGAATAAGCGCCTCGGAATAAAAAATTTGCTGCAATAGGTACATTCAGAT  
AAAATTCAGCCTTTTCTGAACAGCTTATTATGCTTTGGATAGAGAGAATTTCTCAGCAAAGATATCAGCAGACAAGGGGGGAAGGCTTGCA  
CTTTCTCTTAAATATAATGATGCCAATCAGATTTCAATGATTTTCTGAGAGTCCGATTTGGAAATGCTACACGGCAAGTTGTACAGGAAAAT  
GCAGTGGACATCTGAATCCTTAAATGAGAATCTCGAAGCTAAGCTGAGAAATCTCGTTTATATCTTAAACTCTTTTCTTCAAATAGAAA  
GAATAAAAAGGTAAGTTTCTGCTTCTCCCTGAATTTTCTCACAGGAAATATGTTGGTGGAGAACAAGTAATCACTAGTAAATGGAATAAG  
ATACCTTAGCGGCGATACGATTAATACTCGTTTTGATAAAAAATATTATTTTAACTTGAAGAAATAAAAAAGTTGCATTTATAATTCG  
GCACCTACTAGTTCTGTACCATTAGATATCGAAAACAGAAAAAAGACAATGTTTGTACTGTATCATCGACTGTTTAGGCTA  
AAGCATGATCAACTGGTTTTATTTCTTAAATAAAAAATCCTACACAGAAACAGTTAACTTCTCTAGAAACCGTTCTGAGGGACTCAATGTT  
TTTGTCAAAGATGAGCTCTTCTGAACAGACTAGTCTTCAAACAACAATATCCTAAATTAAGCTATAGAAATGTTCTTAACTTGCAT  
TAAATCAACAAAAGCATGGGATCCCTACAATGATTAGGATACCAGTCTCAAATAAATGTTCCATAAGTCTGTTCTTTTCTCTTAGCATTTG  
ATGGCTGCACTGATCTGTTGATTCTTGTCTTAACTGTTTGATAAATTTAAGTGCATAAGCTGCTTCAATATTAATGTTTAAATGTTATTAC  
CTTTTATCATCAAGTCGATGTCATCCAGAACCATTTCCTCAAGTAGACCTTAATAGTCAATAGTGGACTATGATGTTAGTTGAAAAT  
TCAAAAAGTGCATCTTATGGACTTACAAAAGTTTTCCGGTGAAGACTCTTCTGCTAGTTAGACAACAGTTCTGATGCTCAACGACCAGCT  
GAAGTAATTTTCAAATTTCTTGAACGTTTTGATTCAATTCAGGAAGAATGCATAAAAATATAGCTTAAAGCAAGAAATAAGAGCAGTTCA  
TTTTGTTCCCGCTGCAAAATCTAATAGTGGGAGACAAGACGCAAGGTGATCGTTTTTCTCAGAAGAGGTACGAATTTTGAATAAAACCA  
CAATAAGATTTCAAATGAAATACCAGTTTACCAACCCTGTGAATGTTAGCTGTGATTATCAGATTGCAACTTCTGACTTTTCTCATGATTGAT  
GCCTCCGACCTGACTGGATATATCAAGGAATCTGTAGTCTTCCATTAACCTATCTGTCACGGAAGCGAAATAAGTTTTATATTAGTTGAAT  
TCGGTCTGATCAGGTTCAAGTTAATCCTGTGAAGAATCACCGCATAATAGATTTATTGGAAATTTTATGCTTTAGCAGCATACTCCACT  
TCTGTAATAAGCCAACATATCTTTTATAGATTCTGGTAAAGCGAGAGTTGCTCTGGATATAATCAAACCTTTAATAAATAGTAGCTTGAAC  
ATTGCTTCTGATATTCTTCTCAAAAAGAGGTAGCTCATGTAATAATGTAACGCTTGGAGTATAATCAGACTCAGACTAATGTTGTTAGAATA  
CGTAAGAGGTAATGCTTCTAACTTACTGATTTCTTTTAAAAAGAAGGCTTTTCTGATGAAGTTAAGACAGAAATACAGTAGGAAGATAAGAA  
GTGATTATTTTCTATTGGCGCATGATTTTAAATGCTATTACAGCTAAATGATTAACATGGTCAAATAGTAAATAGCCAAGAACTTCTCC  
AAGAACCAATGAGTTTCTTATTGATAGATGACTGCTTCCCTGATATCTTCACTCTCAGAATTTCAAATATTAGCTTCCATGTTGA  
AACCAAGGGCAAACCTGAGTTCTATGCTGATTGTGAGGAATTCGTTGGAGCTTTTCAATAGTCCATGTTCCAGCGCTGCGCAATGAAAGA  
AAAAATCAAGTTTTCTGAAAAGATTTTGAAGCAGAATGGATTTTTATAATTTCTCTGTAAGAATTTTTGAGACTGTTTCTTCTGATC  
TTGTTGAGAAAACCTCCAGGTTGATCACAGTACTACTAGTAACTCATAATGGCGAGCGAATTTGAGCTTTTTATAAAAATGCATAAAC  
AAGCAATTAATATCATCTGGCTGAGCAATGATGGTCCAGTAATGAAAGCACAATGAAGTGCTATTGCGCAACACTTTCAATGTATACC

tacaaatttctgcaattttggaagaaaatctttctaagaaattaagtgaagtaaccgataactctgttttcgctccgtaataaaaagctgtgaat  
gatttttaagcaacctttcgaattcttgcatcctaattcaaagttagtaaagttgtgataataaacttatcttacagtatcagaaaagccccatccg  
agatacaatagcgttgatctgtttgaagatgagatggaagcagtagacaacactcatgaattgcgagaaaacattccaacctataatagacct  
tgtatcgctatcctaataaaatagcactgttggtaaggttctataatcagataactaatgtttgaaatacctttatagatatcatccaaaag  
ataattgagatttcaaataaactttgattttcatcccctcaacaaaatcacgacctctcaaattggaaagggcattcgcgagtgaacgtag  
aacatgcatgaaatggcacttgaagatgccgatagataacatggactagttgtcatacacaatacctgatttaatgatttccatgaaggat  
gagcttgagagcctatcctttctatagacataattaatgagctcattaacaagaaaactaagttggttctaaatgactttctgtaccctgggagc  
atgcatataaatacggttctgcaaaattggcaatctaataattgaggttaattttcaaagaaaagagattgcatacggaaataaaagtgaag  
attggatttgagctagggttcaggtattgattcagatcctccatgtcaaagtatttaaaaaggttggaattacacgactattgtaattgttag  
tatgtgaaagcgcgtaattcttaccagcagtagataagattaagaaatccacgcatgaattcagaagaatccgttcagagtaggaacgccatttg  
tgctcagtaactccatggtattgggtgcttcaacagctcatctagaagattgagttagttatggatccacactcgttatgcttcaaagggtagat  
gcttactgagcaaaagtgaatgagaaatcttgagatgtgtttgagagttgttgaactgggtattgttcttggatagttcagcagaagcaattggt  
tcaatttcaactttcttttaaggtagatgtcaacattcagacttatcccatggcgttggaagttgattaacagcgggatttagctcaatctt  
cttcaaatcaggtgaaggaacctataatgactactaagatctgattcaaaatcgattccatgatattaaatgctaactagtttctgtaatagtt  
gttctgtataagcgtgtagtaagtgtgtggtggttaacttaaatatggatgcgacgcgcttcaacttaattaagttgacgcgcaaccagg  
agaacttcaaattgctgtagaataatgattacatttaataattgaattagaataatctaaataaaaaaattacgtgtaaaaaataggattgta  
gccgaattttgactactgacaggttgcattcttgcagctcaactttacggcactactggttcttgcagttccttgcgctgatttttcggt  
ttaattataaattggattatttaattcttttctattttttgttttggtctaccatcgctatcactattgaaactttgaagacttaattttggcga  
atttgaaacaaaacagcgaggaagtattccttttgacgtttattttcttctgctgaaaagataccaatgttattctttatagctctctgtaa  
gttatggaagcttcaagcagactcgatgctcatgaattagctacagatgaaaatcaacagaatcctttgcattaaacggaaaaggcagaatg  
tttatcgatcgctctaagagctcctcaagtcattagaaaagcttctcatggtccctgcactctactacatagacacagccggttcataaca  
tcaaccactagttcagaacagaaaaatatttctccagatgagaaagaactagatagttttgtgaactccgtgcctgaggggtcattttctg  
accgaaaaactcatcctggacatttctgaagagctcttggattgaaacacctcaaaagtcacagagcctcccatgctgcaatccctttcttac  
ggaagaagactttcgctgttatctatgcttcgaaattgtgaaagcgcaccttccaaggaagatgacgatcaagaccatcaatggttccga  
ttatgaaaccgatataattcaatatatgcatgagttagaatgaactggcaccatctccttctatatgtctattcaacaggaaatcgattggcca  
actagacatttgctgattgactggataatccaggtccatcatttttgcacttctccagaaacattgtatctaacggtaatttagtcgacaggtt  
ctttcataaaattggtatcgttcaaaaaatacaactggtaggcctttctgactgttgattgcttttaagatgaagagattcatccaccgacct  
ctatgatttagtaagatcgtagaaggagctacgaactgaagaaattatccgcgagagagatacatgctaagctgctgaaattgtaattaa  
gttggccagggcctatgtcttttaagaagaatcagtagggctgactcctatcaatatgatccgatcttatcaaagatctgatggaactgac  
attaatggatgaaatgttggaggatataccagtgtaatagcagcagcttctactactgtctatgcaaatgtaggataactacatggacgt  
tgcatcatattttacagcgactcactgctcgacaactggaacctgtgcgtaggtatcatggaatgtattttggatgctcctaatcatcaccgc  
tctattttcaaagtcagtgaaagtaggatgaagcgcacagtgcttcttataaatgggtttctagcattctataattctgttccatctactaa  
cgatttcttttttttaattcttttttggagattgctttacgaaactattttgatcattggtaatgcggcttccactcccaaacattttgt  
tttcttttgcgtaataataatcattttgtaatcatcattatagctaattaattaataccaatgtatcaggcgcacagctcatatggaat  
gaaaagctcatattcactgaccacctttatcaatttttctagttgaaaacatagacgttctgacatcaaagtaggcaatcataactacacg  
ttcaggttgagtactgaataaggatcaattagcatattgctattctacagggtaaaaaagattcttttattctatgaaattcaaccatttaactt  
atgtctacctcaacaattctggtgtcatagcagatcataatgcttcggcctataactgcttaccattaaaaacttttgataattcttctattg  
acaattcgttcaaattttagaagaagtaaatcaatacttatcatttcatgtatgtagtgaactgggaagggattcgtgctttttcaaactgt  
gaaagctcctaggatactactcctcatgcaaagtttcttcattcacagatattccgattggtattaacagccatttaagccgctatacagtgcc  
ctgttgacattcaggattgtgctagacaaggacgattgacttaccgatgataatgaaattccaaaagaaacctgaaaaactacgag  
agttacaaaacagtttggaagagcaataatctattggtgagcaattcaattggttctaaaaagcaagatccgacaggagaagaagccgcca  
gtttgaagctcgtgggaaattctgtactgcgacactcaaaataaagcctctttgtgaacaagaagtgtggaattatttcagaaatctacaaa  
agttgaagctcccgtcaactttattcattggtgatcggtactcacggatagcactatggtaatcgaatgggtgcatggagttatggctacat  
gttgagtagacaaactcctcaggttgggtaatatcttgattacttttatactacgacaatgctaacaagagaattcgtttgtagatgacaagttt  
gaaggaaagctttaccaaacattccaaccgatgagtcctatacttcaaccaacaggaagaacgagaaatgataagtgcttcaaattatt  
tttgaattcattcaaaactctattgcagactatagcactgatattgaagtaagtgaatcctttcacaactctatcaagaatgagaagtattct  
ccctcaaggtattttcaaaccacttagaaaaatctttgacagcttgactctcgtcgttctgtaactatagatgtgcagaaaaaaagaaaagc  
gaatcagagcaaacacagcttagaaataaaatcatcatattactttacgcagacagcggatttcacaaaaattcatataaaataaaaaagccac

aatagcaaaacatcattattttgtattaggttaagtagtgattaaaagaaaaaggaaggaaagcacaggaccagtgtcaacgcagaaaaggg  
gcataaagcatgaacgaagaaaccaaaaaagccattgtagggaaattaataaaccgttgcaatcataagaattcgtaaaaaaagctctt  
ttaattttatTTTTTgtactttgcatttttatcgtgctgaaagattctccgcaaccacaagtagattgatattcgggttgtaaaaaataacc  
gcgactgtaattcatcatccttgaatccattacagaaccgatgattgacagtaaagcccttcgagctactatgatacgaattccgcttgcctaca  
atctcatcaaacttctcaggctgtgcaatgtattctaacgagtaggctggccagcacaaccctttgctttacccaattcgcaagatttatcctt  
catagcgggttcattcagcatgtttcgtaaatgattcactgcatctggagctcaaaaaagtgctagtatatgtaaatatataaaaaaagaaat  
atcataccaatttaataacatttttacggggcatatgtctagtaggacaaagtcttcttagaagtttcattggaggaggtgcaccacgtaaacg  
ggtgggtggaggaattgaatattttgcgattttggcggagatgaatgagggttttcaggttatgaatttcatataaagagagatttcaaacgaa  
attcctaatacgccttcgcaaggaggatcgcaaatctccgagctcataaatgtccaagcatccttgagaatttgcctaaattttcgggtt  
cgatgatacaacctcaaatccttgatattgattataataacaccaaattcttcaaatgaactgtttggagactcaattgtgtctccatgaatat  
ctgttttggctaacgacaagtactcatcatgtttccagttttatataattgctaggctcctgattggtcaaggataaagcaattagcgttgggaa  
tgcaatataatgtaatggagcgtagcgttccagaagatgcaaacggaggattgtgtccaccgcttattgtattttactaaggagaataatagt  
acgatgctggaataaaacgagacggcgaagcagggttgattcctttagaagaacgaagtcgggcgtctccacgactgaagagcttttttt  
tcgttctttcatgtcttttaattgaacagaaaggaatgaagccatacaatcgctttcatgagaaagacaagcacggtaaaggcattgaaacag  
aacgaagatccaattgtacgtataagtccaacaatagccggcaaaagaggcctgcacattcgagaagcagtcacaaatatccttctgct  
ggactctatttaccactgagggtaacgcagtatcgttatattatgcatagacttcatccagactccagcaacctcgcaaacgaattcctctc  
gacgcgtttcgaatttctctcaaaactcgaaacgcgatcgtggaagtcaattgctttactttgtaattccattcattgtgcaaatgaaatga  
ctcagctcgatgattgcatagaaaaagagccaggaacgtagaacctagcagctccatggaacacgattgacggcgtcgagattattgtgta  
cgaggaagaaggatcagagggcgaacaatacatcgacgacgacttgagagcccaatgaagacgccgaattgaaacaaagatccggacgc  
gttctctgatcgaagtcgtcgaagaagacaaacagagtggtgtaaccaagccattggacggactagaaaaagcgaactgactctatga  
atttcaaatgcttgaagaacatcgtgcttgcatttgcctccaaagctctaccaagctcttcgcaaggaaggtatacagcgtgattt  
ttgcaaggaagtcccgaagctgtttcagcctgcactagaagaggcaaacaccaactcagctctgtctttggatttcaactggttcaagtaagcc  
ccaaaaccgaagaaaaagaaatggctatctccaattgcaaaaacacatgcttgaatgcttcttcttccaatattccaaagtattggattt  
aaaatcatctctcctgaatacagtaatgatcaacgactgttctgactcattgggtgatacttcgttcttggattttgatgctgtgtttcg  
ctttagcagtttccatggatttctaggagagatggaactgaaatcttatttagaaattgttatctctgaaataacccttttcaactagactta  
gatcgtccctcaatcttctgtaagatttggtatttgatcgctttaaagatgataccataatcaatcggttactatgttggttctcgttctgaag  
tcgaaattgtaagcagggttgaagccttattcggagttgtccaaggtaccaatctgatgaagtactacactgacttcacaagtgagagat  
cggaaagtcttgaatgtaacggaaaatgacgattagaacgtcacctgtattttcacattccttcttctttgtatgtcttagaatctattt  
actagagatacctgcatttgtgtacattatgttcataatgaaaattcaattcatcactttatgatctacaatacaatattctattaacatga  
aaaatatcaacctctaaataaagaatgaatgtgttctgtacaaggtgtaactaaatcatgctcgtgaagacgccattaactcttctcaa  
ggctagcaattctgtctcgaagcggcaaatcaattagtaataacggtttgcctctcaattcggaaatcgactttgtaactttttctcgtt  
ttcagactggtattgcacagcaaaaatcttagattttcactgttgattgatccttagtgctttcacttcaactgcatgagaaaaggcaaccgct  
ctaaagatcccggtggctgtggtgttaccatagattttaccctcctgatttctcaagatactgttctcgaggttgagcctatcataatc  
tctcttaaatctcaaatagggtctgatttgcatttcgctgttgaagcaaaaattgtctcctcaggaagtgcctttaaagatgctgggg  
gttattttctttctcaggctgtgttcttttagacgatggagttctgcatctttcttttgcctcctcaatcggaattcaactccttctcaactc  
tttaactcaattctgattccgtcagtttgttcttagactctacatcagaagccttgttctcagtaaacgaaactctgatcgcaactcgggtg  
gtttcacctcctcaaaagctctgataatcgtttccaattgccgtttatttgaagctcttctttaatgaacgtagttgcttattctgactagct  
aaaacagcttctgttcttctcaagctcttcaagctgttgaattcgttcaattggaaactcgttttctaataaaggaatttaggaa  
gctttgcaatgcagaatcgagctgacgagtaggctttccacttttgagttaaatcgctgcctccttagtagctttgatattgatcattagtag  
aaaaattgcttttctcaactgttctgtcttctgttactgcgttatgctgaaccattaattcatgataatcagttggacctgcgtaagttcaaaag  
ctcctattttgagtctcataatcgaactatactttcaagttgccgattttctatgtagatcttctgtttgcccaaccagttcttatactttgatgg  
gaaatcctgtaattcgtcaactgttggcatcttaagattgcctctagctttgaaagtgaagcatatgcgtttaccgattctcaagctctt  
tattcctagtagattggactttataaatgtgtcttttcggtaaagcaccgagctcttctcagctgagatactgttaacatcagctcaaggta  
gtaacttttgtcaagggttcaatgctatttgtgaacactttagtacctcaagctcctggtttgctgcttaagaattgatatacattagcc  
atctctgattttcaagctgttacgcctaattcagaagacatatttcaacagatgaattgatattttcgtaatattcgtttcattcgtcagctttc  
ttcaacgatttactcaattctatgagttatgaagttcatctttaaagcagagttttctgaagcaaaagataatcgttgttttctctcatca  
tctctcaattttctatatctcgatcaacggatatttttgtttgtattgaagctatctcaacttggcagcggataacgcagattgactcttc  
attatacattcgaagaaatctagcttttctgaacttatcattgtcttttcttctcattttgagatgacatgcttgcagtgcttctcactc

ctccatagcttgcttccacttcttttattcaaaatatccgctaactcgaactccatatttgaagtggcattcaaactcacatttgaatctcca  
aagaagctaattcttctgagttcgacgaagaatttctcctgtcaagtcaatggctcgttactggaatgcaattctccaaagcaatataaga  
tttagtgactcgttccacttggttcaagccccttttagcgttggagcttcaatttctgatttcaatttctgcatccctcgtttag  
ttgttcatcattatgagtactactaagcatgggtcttaactaaaatatagcttggcaggggttcttcgagctcgtacacaaagcaagtag  
cctgtattgtttatagactctatatcttcaagcgttggatcttcttggacaaaaccaggttgaactgcaaagtagttacaatctt  
ctgaagtgttgaatcttcttccaaactagctagaccctgccttgaagaaaatttggaaactcggattctaaactgatcttctgaaagc  
ccattgttgaagtatcaagagagaagcacgtcgagattcaatataattatcttccggaaggtggccatcttccatacgaagcctgaagcatt  
aaagggcattctattgggaatccagcacgagtaatccggatgcctccaaaaccggttgcacgcaattggtctaaaacaaagctctgttaa  
aggaatggctctttttctcattaggaacaatacatctaatgaaatgaggttgagttgtttaaattgattcatcaattgattcaattgctttag  
ccttgggctacagtcgaaaaagagccttacgagtcgtccacgaactgttttgttcaaccttggtagtcagaaaaagctcagatatatgc  
ttattcgtagaatgagtaataatttggcaatgttctgtaacgttgccttcttcaaccaacttctgttgaataaggaacatcagccg  
taattgttcaaaaaccagaaccagcgaattgaacggcttatacttggagatttcttccataaagcatctaaactggaaacaaaggt  
gcgtctgtagcttggcataacattcttcatcaaggcaagatagaatgccaataggattggacttctcaatcaaatcaatgggtggctgtaa  
tcatggccaaagtcaacaaagtcccattgatttcttcttcatatattcttctgctcaaaaacaaacatgatgataaaaaattgttcgagacg  
ttcatttgtgaattatacataattgttcaactatttctcaaaaattcaaaaccagcaatatccaaaattcaataaatgttggtagcgaag  
tacttcgacttattgcagtattatacgttccagagccagcaaaaattcgttctgatatcgtttagccaacgctccacagaagaattacatg  
cttgggaccgagcactcactaccattcatgaccggcagcaatgcgtggacggataagatttgtgaaaataactccggagatacgcctagaa  
gatggcaagttatcaacatcatcatggttgaaggcagcgcgacggcaacgatcagcgcgatggagatattacatgtgcaaaaata  
gaaattatactgaataaatttaacatttcttcttccgaaaaccctaggttttaagaagatagtaactttaaactcttggcatcattatgccc  
ggaatagtagagaagaattctcaagtattcataatcattaaagtcattagagagaaggagcttttccgtaactggaatcagcacaatcag  
gagttgtaaaaaatgtgatgttacgttctgagagctttagtaacaacacgggactttcagcaaataccattcaatggaagcattagcaat  
ttaccactgattgagaattcagctttagtaatttcaaatcgagaagaattgttctacgtactgttttagcattaccaatgattcaaggactg  
gattcgtctcagaattgcttcttagtttgcagatcacatgcggattgcttgaacagaagcaagatactgtataatcgttgggtgtt  
cagcttaccagcaccagactcaccggtagtagaattgatttcttatttcaaaaagggtgtataagcaaggtcagcaatagcaata  
catgaggaagcttctgcttactttatcctgtacaactgaaccatatttaccgtagataggaatcgtcagataaggatttacagctaccaag  
aacagccagaataagtgtaaatctgatcagaaagatcgttctcaagattatcgtgaccgaggttcatcaaatcgtcagttcagccata  
tcgttactcggcacaaccgagcaggttgagtggtcatttctgcatggtaacgacttttgcctcctggaattgttctgacgacatatt  
gcatcaggaagttccttcttcaagccttggaaagctgttccaggtatgaaatccaaaccaaactgttcttctatattcaagctatt  
atcagctaaagattcgaagatttcttgaagttctatacataaagttcaatttcaatcatatattcctaagttgaagtaaggataaacaac  
gaacgaataaccacaacagcatgcaattgcaaatgaacgacaagagctactcactaactatataaaagggtatcctccaaaattaaagg  
tatcaaaaagtgacaaaagatcagttgaagccaagtggttgacggtaaggtagctttaaagggaagcaagcttcttctgctattcagac  
agcgtaatcagagcttcaacaagacttccattacgatgcctactgtaatgcggaataccataatgcttatatggatacaaaaagtcgatcta  
aaattcctaaaatgatattgcttagaagtagcactatgctttaaagcatacaaacattatgcatacaattttaaataataactatattac  
attaaattaatgaatattacttctttatattacttaataataaccttagtctaattgtttaaaccaacaatcgattccgatggtagagtt  
tagagatcattgatacattaatcccccataataaacatcattcgacagcagcaatcaccacagaggattggcttctggctgttctgtcacc  
attactctcatcaaaaaattagactttacatattggaaggtttccaaaaaggaaaaaggaagggccaaccgattgaaccagtgacctg  
gggagctgcaatccctcactcactgagctatgacccttactgttacataataaaaataacgtaaaatatttagatttaattccaaaata  
attgtgtattatagaattcgcaagaatctctcagaaatgttgcagtttaattaatgtaaccccaaatattcaacttacttgcggttcttaccgtc  
gttacagacgtataggtagagctgattcagtgtagcgtatagctatagccattatagtgctatcggtgttcaaaaactcaaaagtagccata  
taaaaggttcatctttattatggataataaaaattttaaataaaaaactaaatttcccaatgcaaaaataccggaatcgatagccaaatca  
taataaaaagtaagatgcgatataattctatatttggtaaacatcacaattcatatataattggataaaaatgtatctgtaataaccgtataggaa  
taagtaaaaataacaatatgatggtcagaaatggtcaattctgttacaacatcaatccttgtgaaagtataaaccaaaaaccaacga  
aagaacaataaaaaaaaaaccgttcatgaaacttccaaaaaaaataaaaataaaaaataaatagggtgttggtaaaaactaaacgctactt  
atacatccataagatttcttctcacaaggtccagtgcaaggattaaatgacgatcatggaattgaggatgtgtcactaataacataacatgctt  
tccgtcagaaagtaagtcgttactagcatgaagtctgatattgttcttgaatgacttgtacttcttcatagaacgagagttccatattctat  
aaaatcgtcactaaatgtaacaggtatccttctgaacatgcaaccgaattcgttctcctatccattgtagcatccttcttaattaggctt  
cctcgcattaacaaaatgctcgttatggtaacagcaagcaaatattgtggaatcgtgaacgggaaaactccagaggttccgaattatta  
aacgtgagcagatagaagggtcggtcagaacagaggactagggaaactgcagccaactgggatctagacgtacaatatcaattccctttg

acgactgatggctatagaataacttgaagcaattcatagaataacaatccgcaagcactcgaaattcttcgagaatacgaagaactgacgttct  
tttgtttgaaattataagctttttgattatgatgaccaagcccaacaacagggtcacagcaatggatagaacttgattacctgatcctgtttgaaa  
aaaatgagcgttcttctcgtttatagacgcaccttccgttaatttagaaatcttgaagaaagatatattgtgggaagtaccaacgggtattgcaa  
ctttgggctctaaagttccagtttcaatcactcgacttaattgtgggcatacatcgaccgggtcacgcagcttagtaaacagtcaaaccttctaac  
aatcctatttgattactcgtctatgacttgaattttacgccattcacgaatattgctattacctcctcaaaagaaccagaaagacgcccgtcgtcgt  
agcaatacaaatgatagtttccatccgcacctccgaactgagcaatacaagttatatctccatagttaatggcttcaggttaagtcctcctgtg  
tgtataggatagcgccaagccgcttgaacgcacgggtccactgaggatccctcaacaaactatttcaggcgatcgagaagaagactcaaa  
agtatgggataaatcagcaggaggatactggaaagaacatcgctcaaatgtaatgcaaatgggctctttttgtgcatcttctgagcgtgccc  
ttttctcgaaaaattattttgtccatcctaaagtttgaagttgtaaagattccgtatacaaaagtataggttgaagataaaccaccagatgcctta  
ctgtaaaaggataaaaatgttgcctttcaagtgtcaatgtattcaaggaaacctcattttatcagaattataatcataaagaatatccaagtt  
aaggcactttttcttggactaacgttcgtagacctcgtacggaaaattaccagtcctccttaggaattgttagagctgtccttgagt  
tccattcttctgttaaagggttgaactaaaagatccatcggtataggctgttggacacaaaatttcatcgatttgttcttctgtccttctcgt  
gtttggccataatgaaataattgtccaacaaaatatatgtatctcaatccaatcgagtcgtgattcattttcctaaaacaggcccttcaagaa  
gaattcacgttctggatctcttaattctaaattatactttcatggttttaaatacaattgatagaaaggtcggaatacgggttagctcaagtac  
ttagcaattaccgatcgattcttcaagggttgccttaattcttctcagctgacttattagtgataatccagctttaggatctgatgctta  
agaattgatccattcaagggtatattgttaaactgttagtggctttgtagaagtgctgaaaatcaagtcgacgacaacaggatctgat  
ctgcaggttgcctaacgagcaagtaagatattcgttggcattctagcttgaagtttcatcgaccagtggaactgcttggcataattatgt  
aagatactttagccatttctcactccagaagaatatcaccgattagagactacaggacctgtaatcgctctcttataaattgtggcaa  
tataaattgagaatgtaactgacgaattgattcgacatttcaaagacggactgtataaatcagccactcgattactaggtacaatggaattctc  
ttgaacgatccatccctaaaaggtcagcaagagatgaagatcagctacataatctgattctttacatataagttcatgaatattgtttgtcgg  
gctacttcttttggtagtgacgatggcaagagctcgtgaggtgagaggttccaaaacatattccaagaatcatcacagaagctccttgcgta  
ctagtaagtctatggcggggaattcttacacactgcagctgtaacatgtataattagaggaagaggctttagaacgacaagtgtatgaataaca  
gccaccgtttgtaaaataggaagcacaccactgcttgaaggaaactgatcatcaacaaaagttatatatagttttcaagattagtaactttcata  
taaccattctgaatccaatcactatgatatttttgaaggacttcagcaatagaaagtcctggatgcaactgacattgtaaatagtatagcca  
ttatttgggcaaccttgcgaggtgcctcatgctgtttagcactaagagcagggaaaaccttcttctgacatgagaaaagtctcttcag  
agaccaaggttcagacaactactaaataaagcattcgtttagtggcttctgaggagcgtgacactaaaggagatgaaatctcgccagaagta  
tactgttaacaggaaccttaggaagttccctggaatatgtagttcttgagaggggtgaaggaaagttcgtggactaggagaagagggtcaaatc  
cgtaaatgaaggatcgctccaacacccaaggaaatcaatatgagaaagagagtaattatcagcctcgttcattgagtagcaaatggacttga  
gatcgagaggggagaacgagtaggagaaagaggttaagtaggttcaggagaaaaggaaagaggttagctcattgtaaagggtataaaagctgtt  
cgaggaactactatataggagaagaattgtttgaatgggtgtcaaaagcgggtgagcaggttaaaggatgagaagtaggagatgtggagat  
ggcgtttctggtaaaggcgatgcacgtctgtatattgaccaccaggggacatgaggttaaggatctgtatctaagggtcacttggggagaat  
ggaatggagggcattgggaaatgaagaacagtcctcattcgggtcagcatcgtaggaatagacagaactgttgttggaaagcaggggatga  
tcgaccgtataagaagcgttacggcggaaggagataaacgagaactttgggggtcatggggagttgacgggaatgcgtgctgcataacgt  
tttggagaattaaaaggagatgaaataaacgaaaagaagaaaaatcggatatagaagtcgttttggcgatacgggtgagatattaggagtg  
gaaacgggagaagccaaaagtcgtccggatagctataggacgtgcgttcttctcgcctcatctcgagaatttttgcggaataatcattggag  
agcttcatataaaacgagtaaacacaaaataaggagggtgtaagaaacaaaagcagtatcctatgagaatcccaagaacttaaaaaaa  
ataggcttcaaaagaacgaaaaggaaccaatgtatatctattaacaagaaggaaagaaaataaagacacaatgtaccagaataaacggt  
tctactaattaacaaaagatcagaacgtttaccgtaaaaggtgaaggaaatgtcacggtaaaactgaaagaaaagaagaacttttgaactt  
ataaaagtgtaccaagggtgtgaacttcaagaacacagaaaaatcaattccgcaaaggcagacaaaagtgccagttctaagcttacg  
aatgcaaagtacaaaagaaaaagtttggaaaagagagggcgttaaaaaagccttgatataagtagcgggtgggtggaataatgtaagat  
ggctgtctggctgggtaatacagcagataatcgaaccgagaatgcttattattaacatgaaaaataaggaattagaaaaagaaaattgatata  
gctagtcttgaataaaatttcagaaaaacgtaataaagaccaaagttggagtggttagttgcccagaggtatgatgacagtgaattatgctg  
aaacatgacagccataccggtttatattaagaaatcgaggaaacgatctaatttttgggtgatgaaagaattgaattacaaagtttggaaaga  
gatgggatgtgcagctaaagtgtgaaagaatgctccatgttttgaacaaaggaccattttggagattgcaggaaagtaagcaacaaaagga  
tgctcattcaaacctaaaggaaattctacactgagaatcaccatgaatggagcaagcaaggaatgatgaaccaaacttagagaagaa  
caagaacttgggagatgtgtttacaggttaaaggagacaagattgttctttagaagccttaggggttagacacttttactatgcacggat  
gaagaattgctctgtctatctccttaggaagttttagcacaacgaaggtgaagccaaggggcaagcatagggcgtagtagcattaaaggaacta  
tgcgactacttctcgggatgtgaaaagaacaactgtgaccaacgacacggcagctatttgggtgatttcatgtggaactcttgcgtatagagaa

tcaagaaggcgaataatgagtaaaaccattctttgttcatcctttataatacatatctcgaacaagacacatttcttccgaactcttctttgttc  
cgaggctttcattggcaacttggcaatgaacgcgacgttggccttctgctgaggttcttagttacattatgcttagatctgccttagaacgttc  
ttatccatattctctcatatacaaggctatccatgctctccatataacctttccaagaaggaatgaagtataagataaatacccttcatataga  
atccctaagcttattcaattctcgtaaaacctatcctggaagctcaaaactcctttttgtgctcaaaatagcaatttattgcaaacctgtttaa  
caatgttaatgttaacttggtagtatgacctcaatgtaacaaatttattaaggattgaatctgttctgctgttatacagagtgcacagagactac  
ttatcgcgttttctcatgtgtagttaccttctcaccaccacaaccttacttttcttccctaaaacattcagagttgtcgattaaatcgtaagct  
ggttgttttttacacaatggagtatcggtatcctaatggattggatggaatgaaggttctgctgtatgaggaaattttgggtctccacgtaaa  
cgggatcctatccgagctgtagtagtccagtgtaagcgtgtaagctgtacaaggaaatcaaaaaatctcctacgcgcagaattcctcgaaa  
accgatgccaatcgttctgccaagttgagacgtccattgagccgatccatcctacaaccattactcagaggttctcctattaaaattgtagact  
attatgataattcacttcatttataataactagtaacctacaagtcggtgaatgacaaaggagactcagagttacccttcttcttcttctg  
atgaatcaacgaccttaatgcaatctcaaacacctatccctcatcttataatcggaatgattccttactctacgacaccaagacgtgcttct  
tcgctgaaggacatagccttattgcttctcaacgcgaaaattcattaatcaactccacgatcgaacctgaaccttgaagaatcatatacagact  
cgaatgcttctcctgtgattgattctaggagtaatagcatgagctgagccatagctcctcgagaatctcctcaaatgattcaggtctcctcggc  
ggctagcatgagtttgcgaagttgaggatttacctacaaagcggcggaaatccggcttctgtattctacaaatcgtaaaccttcttctatcgt  
ccagtccagttcaccatcgactactgacttctggatttatttcttattcaatgctcccagtagaatctcaaatgagccgaacgagtagc  
cctgctcatccttctcctgcttctccccattcaaacctatcgatgctgagaccatttctctgcatcggttccgggtcctgcttcttaccga  
atgttctaccacgaacctcagaattgtacccctcaacaaagcaatctaaagaatcactcttctgatcatgctagattgcacattggaggctat  
gaaacagaaacgtctacatgctgaggctacctcagctcttatactttaagctgtataaatcatccggatctgccactatttctgactcttgcactt  
atccatctagctcctactgccttgttccatccgaaagaagttccctgttggaaagggttaagaaaaagcgtaaagttacgctgcttcttccctg  
gttgcggaagagttgacagcacgaatacaactaatgacatttcaaaagatggcctcatttattcaaatgcttccacaggggactatcggtcagc  
ctccttatggggattatccatacctcggatcgtacttggcttacttgggttagatctttagatgctcaaaaattcattcatgatgttacatagac  
catcgacttctgattccatcgagaattatcaattcaaggcattgattaccgtcgcctcattctcagatgcagcttctcaagagatcgta  
ttatcgtgacacaatgaggattcagaatcaagtgctcgaattcctccgcaacaattgaagacgtacggttccaaatgggtgttttacttgttaa  
ctcactgctatttctcactgtgccaagatcaccttgcatttctatttctgtccacggcgttagagcaacaacaccgcatgttggtaaaatgc  
gtgtaacgctgaacagctccttctgactttttagatgataaagagcaaaagttaggatccataggttctcaaaagaatagcaaataggtta  
gtgaacgcgagcgaagaggcaggaagtaattgtgaggttattatactgaaagagactttagcaaggattggaatacttacgcgactactgg  
attaaactttatgggcttcaattgtattaatgaacggaaaaaggaaaagttattcgcacagtttcttgaatgcactagaggttcaagctgtga  
actcaaaactgctgaagctttaaaccgaaggcaaaattataaacctattgttgacaacattgccgatatttcttagaacacgtacaaaattga  
gcccttattcgttatgggtgctgggcaattatgaaagatgaattcgaaaaggaaaaggtaacaatcctgcttccgcaaaattgtatacagc  
gttgaacgaatgaaggagctcggaaactgaattaaacgggtatttaacaaaccaaccactcgattagcgagatattcttctttagaggct  
gtattaaaatactgatgaggaaaattcagataaacaggacattccgaaagtagtaattgtatcagaggatttctctcgttcttaacgtagaa  
agtggaaaagccgaaaaccaatttaaccttccatttaatacaacagctcgtatttaagcccggtagcattacgatttgcaccttctggatgcca  
acaggcaacttattttaaaggaccgttaaaaaagaagagtgcaacatccagtgctctggattccagttcagatgttagcatgttcttctgacca  
tgcgcttctgatagtgaaagcctaaatttataataaaaagggaaatttacaagctaccagagaccaatccttgttcttacaactttatctac  
ttgatgaagctggaacaagaattccttattcaataaaaagtaacttgcagcggctcctcaaaagtgcaaatggaaagccaccaggaagattgcac  
ccttttagttgcaactttgggtaggcagggatagaaatcacacttttcttcaacagaagtaggtcgtgacaaatgggttagagcatatcgatc  
accagcaacttgttgaacacaggagtaatggttgaatctgtaacagatcatctgatttcttgttaatgataacaaggtcaatgcaatcgg  
cgttatgatagtggtcgtcattattatggaactgattatggcgtgatgatcgttccgcaaatcaatagcccttctcagttcaagccagtcg  
agctctcaacatttcaatgtaattcaactggaagttattgaagaattcaatttattacttttgttctgacaaaacgttattcttaccctgga  
aatgatagaagcagatacaagccaagctccaaaaagcctaggaaagtttgggtcactactccttttccgtgctggatagctcgggcaagt  
tttggttgtcgggttaaaagttcagttctaagtgctacaatcaaaagtttgaaccagtgccgatctcgttaaaggaaagaatagccagttc  
aagaagctattggcagtaaccaagacccttaccgaatcattaaggaactttacatccctacagagtcacttcagtagatttcttaaaaaaag  
ctttcgttggatgatacaagaggttctgaggtttagtcttgaacttggaaactcaatcccttctagatctcagatatacgccttgaatttgc  
gaacgcaaaagaatgtgaagccgattgctatatacgcgatgaatgggtggaattttattatgttacacacaattcgcattcttctgtaacggg  
atggatggcgttctcgtacttctgctgctggaaggaatcctcaaaacttctcagctatccatatacttagcatttagcctt  
tcattgaggttagacagtggaacgtcagagctagtcgatgttattctggcaataatcaggttacttgcggatggacgaggaaaattagga  
gaaggcggtaaatttttatgcttctgatcaacgtagagataatgttgacacaagtgctcgttccctcacttaccagtgtaatgcagatgt  
acatgtaaaagaagcttactcctagcaaatgagcttacgatgaaaacgatgctcattctatttatttaggttaattttttatgggttacatt

taggtcatatattttatataaaacgtttaagggtgcatgaatataatgatgaataaaatTTTTgtgcttgcataaattatcctaaactgtactaata  
attcattgagatcacaaaaagaatgtagactttaagagcaaaaaattgaaaaagaacgtaaaatctaaagtctcaactttattctctgat  
tcaagaggatcgccatataccacataccaatattggttaaggcgtgcttgctgctggcaatcttgcaaaatgtcaagcttcagaatctttc  
aatgtggtgtaactttcttttaggaataacgtagccatgcccaggggcaaccaattgagatataacagtcggagaattcaaaacatcactggggt  
tgaagaggttacagaacaaaattattgttttccatcaatcttggaacgagacccctgttcatagtagcttctaaagacgagctggcatc  
ttcgtataatcagaattaggaggaggaagctgtacgaatgtaagacgggaaagttgagcttggggctcaactttgaaaactttcaggaagg  
tatacagatTTTTgaaaggaattgtccacactgccgtagctgtataataagacgtcagcattcagattctctcggttacagcgtagaatTTTcca  
cgataaattgcattgtccagagtagaaacagcagcaacgtttattcctacattatagcgtatcaatggttgtcagatTTTTgataattagagagct  
cggacatcaagctttcaattctgtatattggggccagcagcttggaaatgaaaactttccatcatcggcgatatacctaagggaacatccaaat  
acaaaggttcagaagtagtaggagagaaggtacatcactTTTTcctggacaactcaggtgcatagttatgccatgccacttttctttctttg  
gcagaggcttcagcatcatgatattgggtactgaatggttattgattagaataacctgacaccaggctaaacttggtttaataaatccaaag  
caaaattagagctgcgattgacaattaatcaccgaagaacagagttattatcgaccgaaagaactcaactcaactctgttgaataatg  
attagcaaagttaaaggagtcagaagcaaaaggttctttctgtgaatattcagcagctcaggagtagcggattccagcacaagcgaac  
ataaaagagcagtttcttgggacagaagcagcgaaaacgggaaccactgataacgttgcgatgacaacagaagctttctgttctctgaag  
ggatgaaaggtattgacgagacctaacgggggttcagaagcattgacaattgcatcaactgaggcttcttcagaccacatgcccttttagct  
tctgtgacagacttctcgcctgaattaggaatcatatactggagaacgatcgacatcatcgcctctatgtcgaacgaagcacaaccattt  
caacagccaacatagcaaggtttgtccatcattaaaagtaacggtgcaggcattaattcgggtaatccattttgggcaggacgaacaaaatca  
agagagacgttaactggctaccgactgtttttacggaaaaattcgcgggcatcaaatggtaaggtgccttctcattagaaggccttggat  
ggcgtatgctgtaagttggagtctgatttgaacatcatcacggcgtacttcaagagtagcggtaggagattacagagaacagtagcagaa  
tactcagaagagaagcagcggatattggttaattaacatcctccagatcccaagtactcgtcttctgtttacgttgcgataagcgtaaat  
tctgcatggctcaggaccaagataaacgctatgattgtcggaacacgaccaagaccgcgaaagcaacagctgtgcaatattacagctgg  
atggattacgtttgcaatgaagctggtgtcgtttggtgttacacctaacaactcaataaccacatttcttgaaaagtcttgcttcaacaattgcc  
tcgacgatttccgaaaggttcttctcggtagcgggttatttccgtatgtgtggtagctcaggacaacggacaccgcaagcagatacattat  
gtactgatggcgttaggctttaggagaaggcgcaccgtaattgatcaccgtcgaatatttcaataatcattgagtttcttctttggtttt  
tttatgaatttccgaaatgtcagcaggcatagcttttctgttgaactgcatcttctaggttactccataccaagtttagcttgtgagcagcgg  
ctgagcttcttcaagcttttaaaataagggtttcgttattagcttctcgcgaactcctcaggacgaagcttggctagaccagcgcgtaataaa  
gattcagcaaatcaactcagtagcaatgcaacatattcacgcttggtagtgggagcaacgttgaacgtacacgtggaagcaggacgtcctac  
aacaagacgcccagagaatgttctgggcttcaaaagcaaatggctcatcacttctttcgaacagggcagtcagtgaagcaagagaaaaac  
tgcttttcttgattgtttcaagttatttttaacaaaatagtaaaatcaccgctatgagcgtatttaatcatagaagatacatattcactcattg  
tttatggatgaaaaggttctgttaaaggatggaacgataagatggtggaacttgcgtgtagcagcattatagaagataaagaacaaagt  
agaatatgaaagaaaataagataataatagttgaagtatgcaaaacaaagtctgagtagcagatttcttccaactaccaattcatgggaatctg  
tttcgctttgttagcagtagcttttttagcttctgtttttcttttaataatatttctaatcttcttctgtttctttttctgtcatgtttaaaaaat  
atgtggttggttatattggagtatacaagaatgaaaaaattgccgattcaggttaaatgtatccttcaatgataaaacagctttttttttt  
tttcttcttctcctgcttggcggatgaagagatattcacagttgtttacggtgagaaggaatcgttatattgacgggtttcgtctgattg  
gtagttttgcttctttgtccctatagagcagcttgtttctgtttcaaacgagactcgtcaaacgttgggaattgctttgtgaattct  
caggtaatatgataaccctgttattacgttaagagttcttttaagaaaatggactgtcgtatattgcatggaacgaatttcttgcctgaaaaag  
caaaagatgaacaataagtaattttattccttctttataaaagcagcactttatatacggaaactcatatacactgctgcacacgacta  
aaaaggcctcaacaagagactcaacatagcgtataggttctgttataagcttcatcatcgatgaaaaagaaaggaaaaacgataata  
atataaaaaattcaaggaaagctgaatatctgggtttaagttcaattttgtagtcacatcctgcttttgcgttcttctgttcaatcattaggtg  
tacattcaagcttttctcactataaataacttaacattaccactacaaactgtaaggacaacgtggccgagtggtttaaggcgttcgctgc  
tatttagtagcctagcggattcccttgggagcgcaggttcgaatctgccgttgcgtcaacagttttcaaaattttaatttttcttagaacac  
gaacaatttttctactcgtatcggaaatttctacttttcaattttgtttcctaaatctttttgtatcccgtttacattccaatatacctccttgc  
tgctcgtgatgtttctgtgcaattcagagaacatagaattcgttttaaaagtaacaaaaagtaacatagaacggccaaagacaattggtaaat  
aataaataaagaagaagaacataaaaatgcaacatgaaatgtaataaaactaaagactaaagactgaatcagttcaattgacata  
agtctcagaggtcatttctactgtccttttgcaagacacgtcttcttggtaaaaaggattcattgcaagtcgcttctgttaggtttgatgaaaga  
aatttatttttctcaattgaatcttcatagattcgtatattcgtccttcttttagggaatgggtgcctataccctcacttctcctatagaca  
acgaactatacttagcttctcgaagaacagctcagatcacttctgaattcagaaccaaacagtttctttggctttatcttttaaacactg  
taagatccttttttgccttcttgcgcaattcctccttttgggattttgcaagacttgattcctcgggggttcaaaagctgtccattgaaaagac

atacacagttaaactccccttccctctgtctttaaataccacgtaagacatcaagccatgcttcttctgctttacctcgactgctgttcttcaacaat  
ctgcttctgcttcttctcgggagaagctgttttgctcgaagttcatcgtctcagtttgtacaaaaagaaggacatcagagaagcaaggacaca  
acgatgcaactagtcgatcttcatctacgtttcatctaccagctctgtattggctggtacaattctgaaaaacctcaacatcaagctggagg  
cattgaccagtagccaagcaagacatgaatctctgattggcttggacgcttttagatactcctgcccaggactctcgtactgctcaagctgc  
accggaagaacgcaattctacatccaacttttgaaaaagaataagctttaaagggttcagggatcttccaataactattactgctttgt  
actcttcttcttcttctcctccttcttttttggttcttctccttgccatgctccttttattcccaaactttgaacagataataagctatggt  
acaactgattttgtaaaaaataatgcaaaaagctatttttcttcaatcttaagacagaccctgtagacattaaaactgctaatacagaa  
atgaagtttcttctactgattctgacttctgacttatggatatctgaaaattaaaagctcaaacagaatccagtaaacctatagaaggatg  
gccagtaaaatcattttaaagatgtagaaaaaagggtgtccaacttttaagaaaaactgccgacttcatgaaaatggccataatacgaacgc  
acatcgaagtagcttagccgggtgggtgggtagcgcacaagttgctagggtctttagcgcgacttagatgtaacattaaacaaaatcaatgg  
tatagatttcgcaaaagctatctagaatgtaataagttggacccaaaagctgccgttcttcaaaaaagcaattggaaagctgactgttaa  
tccggaccagagcaaacatctagaacagcgcgctttcactttatggattggacattgatttctcgtcggttacgagaagaacttacgatgcaa  
agtcgaattcctactgttcgacagggtaccatagaacagatacttatcgtcgtgactttactgtgaactctggttttaacattcgtagcgaac  
aagtcgaggacatacaaaaactggtgatttctgacttgagaacaaaaattgggtcacgcctatttcaccagttcgatcctttttagaacctc  
tccgaattctcgtggcctaagatttctttaaatttagcttttctagatccttcaactcacgatgccatacaaaacttggagtccaaaaagcct  
ttaaataaggtcagcagagagcgtgtcggtagaagaactgaaaaatgttagcagggtccaaacctgaccttcccttcatctgatcttctc  
tcatgtatcttctttatgtttggcctgtaccgaagaaaagagagaagccccagagagccacggaatctgcgacttaccttttgattttt  
aggaaaatttcttagactgccatccttaagtgtatgaccgattttctatttggctgttactgcttctgctccttgggctcatcaatccattattca  
aaagaaaaactaatccataatcccgagtaataagctaaagataattgaaactaaacatcatgctataactcaactcaatagaactgcttat  
acgctgatgtgttgacactcttgcaaacgacttaaccaaggcttctcgatcgaactgggtaataataattcgtcaaatggaaaaaattggcctat  
tgttattcttctcatctccttatattcgtattgcaacaacaagatcgcagttaccagtgatttcagaggttctctgacctgtacaagtaata  
cgatcaaaactcaaaaagattacgaattaaaacttggtagatgtatgtaatttcaattttaaagcctataactaactaactaaatcagggaaagc  
aatcattgaacagatggaaattaaaccaggtcctgaattgaaaaaatcatggaaacaaatgatttctggcaattgaaaatccagaaggac  
agcaacgatttaacgcatacttgcctcttaaaaaataatagaacagaaatgaagtcgtgggaatacacggatttattgcatctgctcata  
ttagaagtgtagcaactaaaaagaattgatattaccaatctcgagcaggctcttctactcatattctgtagttccggaataactctgtac  
aatcaggatagcagtaattcaacctcacataacagtggttccgtccaaatcatcttcaaagtcgagttaccacaagaagcattgtaagtaa  
gctgatcaaatgctctataattcgttaccgtacgttgggatagccccatgcactcatacatagctgtacaccagtttctgtatagcaggtg  
tatcatgatataatcagggtacgattgtacttcatatacgcataaggacaagcttatttccgcgcaacataggacataacattgagcctttgc  
aatcgttaggaaagacagaattgcataaccaagaataaacatgctcttttttcttcaaacctttggtaggctcatcaataattgctggttca  
agctcgtttgatcttctgaaatcggtagaagcgaatgactgacaagcctgcaataaagaacaacgaagctcaaaaaaattcctggcgcattt  
ttactcctattagaagataaaacttaccggggaatggatagaaaagagttgttatatactgcagcgttctgttccagtaaaacacataaaga  
aaacaaaataaacacaaaattcgttgtaattgtttacgagtaggataattaaagtgttttctgaattccccacaaagaactatcgtctataactg  
aacctcctaattcttcatcagaaacattgtttccgattccacaggttcatttctgttttctgaaaggattcttttattgaggagagcttctgttataa  
tcttgattcgagtctcaagatagagagcgtcataatcatcaggacgtaaatagatccttcttataaacaagcatggccatttgaagttcttt  
atccttcaataagcttctcgtcatgtttctttagttcttcatcctggagcagagactcctttgtgtggcttctgtcgtatgctgttattcatct  
ggaaagcaacccttctgtttataagatttcttcttggatggattcatcaaaaaagctcatctggttaagctggatttggattttttcaatag  
tttcatcgtttgatgactctaacctttttgagaaatgtgttctcggggaattcgaagctcgaatttctcgtactatcattgatgaaggctttg  
ctttttcttctcctgaattgagtcactcgcgtccgttttactccagttcttctgtctttatttttgaagtaaatctcgggcatctccattttatacta  
aatatgtattttttcttataaaattaccctaaattatataatacaaaaagttggcagtaagacgaactccaactcgcgtttagggttagcta  
tgactagcaactactcatcattaccatttccacaaaccacagaaaaatcttcaatagcaacaatatatgattcattgttatggatttaggat  
gcgttaattatatacactcattatattaaacggcttgaatacgaattggtatgaatataagccttcaaaataggaaacttctgaacgaagct  
tcacaggaatatacagttctataaaaaaaaaatgagttctactagaaaaatctatgagaaaaagaagggttactacaaaagctgctgaaggag  
atcttgcaattggcgtgaaagcgaatcggcagttcgttgacatttgcggttctcaaacagacaatggcgtatttgggttcaatgtgacggttga  
ttgctggcaacatgctggttgttggacttccggaagacacaattcctgaaagttattttgtgaaaaatgtcgcagaccagctgaaagtgatcat  
gaaattgagcaagaggaatcttcatcatgaaattacaagatccgaacctccactaataggccggtttagctcatacatagaaaaagaac  
aagcaaatggaccatctgaaaaatcgccttgaagacgaagaatcaacgtttgtccacaagaagagaagaatcgccttcatcaatatctc  
ccaatcttctgattctgccttcccctgctggaggtaggattctcctaattctacgactggtaagcggaaaacgtcttctcagcttttctc  
tatactccaaacgcattaaggggtcagaacaaaagttacaacccgaacagcttccaggaggatataaattaaagtttgcgatcgaggaatt



aaaaatcctgtccgaaagagtgtagcgaagcttgggtctcagtttctgaaccattataaaaaaggcagagaaagaaggtgtcgttggctta  
caaggatgaatactacagccttggcactcgaactggaaaatacaatgttttagagctgtcgtataatgcagatcaaagtacaaatccaaataa  
tagatacagagaaaaattcagactcttgccttaatttgggtgatgacaagaatcctgcgttccgtgcgctgttttaaagcaagaatccctttt  
ccaaattggttcacatgaccagcgaagaatggcgaatcccgatctaaatccttggctgaaactattcgtcaacagagtagtcaaaatctggtt  
tgaacaacataccttgggtatcgattcgtaccatgcagaatgggtaaatgattgtacaagatgatacaaatatcgatacaaatagctcaacc  
atacttctgccaagcaagtaactattccacctccgctgaagaaagtattccccggagacgaatgagtcacctgctatctctgaaagcaaatct  
gctccaactctgaagaaccttctaattatattaagaagaagatactagtaaaaaacaaaatgtaaatgtacctcgtattgttgagatt  
gatgatccttctgactagatagttgagaaggaatcactggtcataatgaacacctgtcttccgtattcacctaaagaagaagaagaagca  
tcagaagtagaaaacgttccgaccaaaaagaagttctatggaagggaaaggtgaagatggcttccatctcagaatcttccgagcaagctat  
tatcgagtggtcatattgactttaaattttattgagatttcttcaaccgctttagcgaaggtcgaataagcatcttccgactctcaatatt  
acgggcattacaaaatctcagccaagagcattgttctgttcttccgagtaacaaacgtgaaacagatggattaaacgttttgataag  
tatttttggaaaggaatcggtatgggtcctacgatccaaatctgcttctgtaaggtgcatacataatcctatccctcaggtcaggatatacc  
agaagtagaacctgttgatgattcaaagttaccgaaaaatcgcaatctttatctttagggatattgttttaacaagactaacgcgaaa  
ggcgtatgctattgagcatatgcccttgggtcctcctacattgttcttccactacgaagccaattgctactgaaaacgaagatatt  
ttgataatccttaaaaagattacttaagtgtctaagtctagaagacatcttttaataaggcatgtttagagaataatcattaatnaagcca  
acccaaatctcgcgattgatccaaagttatgcagaaggcgtatcttgaacaaagcaaattttaaggtagtttagttcattagaggaataca  
cttcaacataattatactgtccaattgctccatgaaggtgtaaatggacgacatgcttttgggtgattgtttgccattcattaatgagctactatt  
catcaaaaatgtatgaaagattgtgattatgacaattaagcaaagcgaattagcaaaaggattagaaatccttgcataatagctttattgtaa  
aatcatacatggctttattaatgctattctacagtttggattttggttaaatacgatatgacaatgaaattataattacagtaagaacgaaaaata  
aatttggagaatcatgacctaaagttgctgttattgaaggtatattaagcaaacatgatcaacaactattaacgtaaaaaaaataactctttc  
tctatggtttcacttagacatgatgaaagatttttaattaaccaaggcgaataacaccactagcaataagcttgcattcttctttaaagcaca  
gggctcttcatatgttcattaaggcagcagggtttcacgggcttggccaaggatggcttgcattggcaggatcttgaaggatagccaaacgtca  
ggatcgttttgatacgtgccattgttctcctcagttcattttgctttgagcagcattgcattcatgattttgcaattgagattcaattcacg  
aatgttttaccagattgggcttctacgatcaacatctgcagccgattgcaagatcaatacacttccatagcttcaacatgaacaaagctt  
gagccttacggacataagcttttgcaaaaagaggatccaactggatggctttagtcaatcacgaatacactcggcaggtgccatcacctaaagg  
taagcagcagcaggttccgaaaccagaggatcagtaggagcagcgttggctatttcggtatattccttgcagccaggcaaaatcaccgga  
cttgaagagatcgttaccttagagcggcctcatcagccttgcaggattaatgtaagattcacgatcttgcctttcttcaattttcaacatcctt  
aactttgtaagtgtatcagggctcggtgttcagtaagagaacgctggttaattcaattgtagtagcaaggcaccagcttttgataagtagtac  
ctaaacgaccaagagccttagcgattatnaaagtgcagcagcaattcacgcttgcataatggcttcttgaagtagattcacagttgtccaa  
ctcatcagcttctagtaagcggcagcaaggtgttttaggtacgtaattgtcttataagatcccaagccttctgtatgttctcaatagcaacagg  
aagttgcgcttctgtaattttcattaccgattgtttggcctcatcagcttcttacgaagggtccttgcgtagctgttctcagattctcagaga  
tttgccttccataggttagcggcaggctcgggttagcttctcctgggagcatttcaaattgggagattcagaaggagtagcttgcattc  
atgtcagcggcatcatcctgcccttcatgttatcaatgccatgagcacaacatcaccttcatcactggtcattcaattcgacatga  
tagagccagggttctttggatgtttgaagttggtcataaagcctgcataccagcaagaagatgttccgggttgccttccaactttcaata  
aactttgggtcattcaattgagaagcttttggcgaatggattgaaaccacatccccccagcggagcttgggagcctcaacactcttagg  
ccgttaagagttgggcttctggggtcaaaactcaaaacttctcataagcagccttagcagctgacaggtcacctaaaccatgcaaagctgct  
cccttacgcgaccagcctttgccagtcaggcttaggttagtgcatttggtagcatcttctacagcactctgtagttctttctgacgataacag  
gctgatcggctcagatataaaatgattgctaccgtctaattgaatagcttgtgtaaagtagtcaatgcattcttgaatctttctgtgcaaagct  
gcgttgcctttgcttcaattcttctgccattttgcttttgaatccttcaatnaaaacttcttttagcctaataaacagagaattcagtg  
aaataatctaaatcgcttccggacgtgttttagttccttcccgctgtttgtcgttgataactactacgctcaggtcaactcaatcctgagttcc  
tacctagtagctatataaggaatgacgattccattcagcaaccttacgaaaaatccagaataagcaagatcgttccataaacctcgcaatt  
agataatgtaacttaagagaaaatttgtattaatataatnaatgttttcttatcgattcaatcagttatttttaaacgattcctcaagctgcaa  
aaagatccttgcactgcgatgcgttcgtaacaaaataaaatgttcgatgattcacaagaatggctcctatttagctgctccatggatagttcat  
agcaatcctccttgtattgatgtcagggtagaaatcaatggacacaaagatgcttctctttttagcttgaattgtcaatacattccattgat  
tgctgactctcaaaaactcaatacctatctaaacttgaaatatacaaaagttacaataacatacctctatgtaagatgctaccggaataagat  
ccatgattctaagactaaatacatatattttattcatatattctgtaaaggtcaccttaataatagagacaagcacaattctaaggaaga  
agtaatagaaaaataagatataaaataaagcgttcatacaaatcatgtagcattaaattcgttaattcgaaaaataagattttgtagaatggaac  
aattcagttctcaagcaaacactttttagtatttcaatttttctgactcaagagatacagatagcaaatgcaagaacacatttggct

ctttctaatggaagcttccttgacaccaaactcctctgtgaaaacttcaaagaacaacgcgtctctaaagactttacatacatctaagc  
aatgatattgaaaagataaaaaaagacctctgttgagaaataataaaactatccaaacccgaaacatttacttttagcattcctttccacat  
atattaccaaattaatcttcttaattgtgaaagaactccttgatccggcaattgagcatcatgatattcgtccacagatccatttcacttcgata  
agtcacgaaactagaagcagggtagatccgtcacgtaggtgatgaggacgattctcattcaatcgctccggcgttgtctctacatgcttatg  
aggttcatttccttgagctgagggtcagatttcgagcctctaccaataaggctacgatagtagcagcagatcgttttcgctaaaaattggtatacga  
tcgtccaaactacagagcacttcagcatcagacttttcgtacggtatatccatatacaagtacatattcttcgggtccagtttgttgaatatttgg  
tgccatttctcgtttagcttcccgagctctagccttttcgctgatgatcttcaatcgagctcttgactttgttgaacagattggtctcggcgt  
tcacagcctcatgtctcatgccataactctgtgattcataaagtttcttcttaggggtcgagccatgacaggatagaccggcagctctgtg  
acatccaaaaatgtagaggcttccctgtgctgacatttccagtacaatttcagaatcccactttccagaaagttgtacagcagctcacctgtgct  
tatgcttttaccttccctgcaatggaattgtaggttccactaataaagccttctactttaaattcgatatacagctgcaagctgtatctggacaacg  
cacagtaacatgatctctaattctatccgattttaccaacaaaaatgccacgagcatacatatttggctgggtcaaaagatactcctcattctgt  
tccaaaaattgatgctagcaactccctcataataactagctgcagaattacctaataaagcgtgacctcggctttaggacaccgtctatgcaact  
ttgtattgaggacagtaataaaaataggcactgatgggtggatgatgggacacctgttcggctatgtataccgcaacaccattcaggttattcagc  
cccggactttggatgctggatggaggaaacttccaaaagccgtgaacgtcttccaaaactggattcagcggtttcttaccccggaggggcg  
aatatgccatcctgaaaggtaaaatcgacacacctcaaggaaccgttcttcggcagaaggaacatgaggaactgggagcagaaaaatctggatg  
actcataaagctaatacaactgttagctcacaaggtgtttatcaataaaaaaggttttcatcgaacatctccatatagtatagcagctacttg  
taattcgttccaacattgacctcggctccaaaacaaacgtaggaggtgtcaccttgaacagccatatttggctaaaaacagagtcagcgatact  
gtgtctaaaagcaaatctttgctacctcaattgagacacaattccaagaatgatattctaggaatacgttaacaacggctctactagacgaaaa  
gaagaacaaatcaaaatataataaagctgtaaacctactatcgggagcattgtatcgtctacactacaagttgcttcttccaacgtcaagcact  
acaaacttgcctcatcttccgatttctcgtatctctatcctgtttgcatctagagatgttttggtagccacatccaagaccaaggatttctaat  
ctttgatgagcgtagctatttcttacatacaggcataatggatcgcttatacaatttcttatttccgtaataaaaaatggctttcttagtagt  
tctcagtgaattcttcttcttgttggttatttgaactcttactcggctatgttcgacgttggccaaaatataatgtattgtaccttgacgtcaa  
accaggaaggaaatcaaatgtaaacagaaagccccagataagggtgaagagaattcaaaaaagaattaatgaaaaagaactgtttgc  
ttctattctatttttggctacttctggctcattctgaactcaaaaaatttattaccgttccaaaacaaagagtaaggaacacataaaaaaag  
ttatgaaataggaagctgcagctggctgcaattgaaacaaagcgcagctctttagcttcaaatattactagtaaatccaagaaaaaacacg  
aggggaaacagacttataaatcaaatcttagtccgaaagaaaaacagattgtcctttctgcatgaaatccagcttccataccaaaaaca  
atcgcaagatggccagccctatccgtctgaattttgcaaatcttaagagcaaaataagaccaatgtttggacgggaaacaaaaaagaaa  
aagtaaatccccaaacttctaatccatagtaaccctttaccaaaagtagattcataacttaaaatttccgctgtattactcgtcatcgtctccc  
ttctgagccctttagttcaattctcatagcattgtaagaatcactatcaatacttacccttcttcttcaacttctcgttattcttggct  
ttgaaactttggttccagacgtcttctcgagattgtcttcatagctcttcaacttttcttcttcttattcacatctttgttctttttct  
tactaattccatttctcccagtttccagatcgtagtcaatgggtgcaattctttagcaacttttctttacactttgaggcttttctcagaagga  
attgttccaacatcatcccctgtaggacagatcttctgaaatttctacttctacggattgcttcttggccatctgtcaatttctgatattggcaaaa  
gacaggtaggtcactgtgatgaacctctggcagcagaataatggaaaaatttatttagcgaatcctaatacagtagaataaaaaaagaaa  
gcaagaaaaatttcttcttttctctcattacctaagggttcgacaaaactcataaaatattatctgattgaaatcaattttatctaaacata  
gtaagtcatcaagtgttttactagtttctagtatacagaatcataaactctgaaggaatcgtctttaggtttagcttactcttaacctcatac  
attgaaacgcagaccatccgagaacatgagagataactgacttggatcccgcgcaatgcgtattaattaccgaccgaaacttattgacaaa  
gtgtggacagtttttttacaacaaaagtgcccttcagcttccgcttccacagactgcgttatacgttttctttaggatctttgaaatagatg  
aagtggtcttccatctcttctcattctgaaacttactattgagcttctgtttccgcatccttctgataggagatattaacatgaaaataagg  
gatcatatcgagcacttaatatggagactagcattcacttctgtcggagagttcaagtgtaaactccatggaacggcgaataacacctt  
ctacactgttataccataaccgtctacaacatctcgggttaatcggaatggaacacattctggcagcaggaatttttccctgaaaacgattagc  
atttatttcccttccatctgaaatcccttagcaatacttactgctcaaacgttataccaagatcaaatgtaccacctgtcctgacgttacatcta  
ctaatagttattcgcgatgcatccaagtcacaaaacataatcctaaaacggatgcgactgcagactcttgaatagttgtctgatttctaaac  
caaatcattggatccggatactttcaaagaaaaatgacgaaatacaggatgataatgcctacaaaccaagtcgaataccttcagacagagtc  
ctgatcttccatctgcttttactatcaatttccgacagacattcaagaccaatctttaggataatagcgtttagggcagatctaaatattca  
gccataggaaccgtattcaataccactcaataacaccgtttttaaagtaaggaattactttataagttctcatagtcagtttcttggcattgtt  
gatctgtagttttcaaaaatccgttacttctcaataactgttccattactgcatcctgtcgtaaatcgtcatttctccttcaactaattgtttatg  
tattcttccatcggagctggatcatttcacgatttttgaacattgataccagaagcaaatcaatagtagaaaaagaaacgactgtaggcac  
atcagaatagttcccatatcattaatcgccaaatgtgaagttatgggagctaaactagttgtggaaatcattcaaaaaccagcagcacaag

gggagcggctgaatgatgtactagcggtttactgcgagggtccattcagcaagggtaacataattcataaaaacctttaaagcttatcgatta  
atgatttagattccccaaaagttgcaaagtttcatgatatttgaaccgcagcgaatcgtgactccccatttcgagtttctgctcggatgggctg  
gaaattaaagagtaaagcacatgaagtgaatgataagggtgcaattgagcaacatctaagcatattctccgagtagttttgaaacttgctgcc  
atcattgagaagccttgacgccaactgataatacacagggataaattctacgaggcgttccaagatatggtcctcaatcacaactaaggtt  
tccgaactagagttgaaagccacataatacaaacctagatattgtaacgtcgttttcatcactcttaacaaactctttaaataatgaataaac  
cctttttaacatcatalcttggagcacaaggtttgatattctcgtcgtctgaaaggagtccgccatttctcaagtaatgatgttcagaa  
ttctcttcttttctgcttgataatttagagagtcctccaattgtaaagtcatccttctttcaagataaagccttccgcccttctaaactct  
cattaagttcagggttgaataattcgcatcacaacatgaagcaaacatataatgaattttgaaacagtggtcatccagggtccgacacgtatg  
aaatggcctttcgaagcagtttctaagatgaattcagtttttccgacttagtagaaaacaaccatttccagataagcatagcataaagatga  
aacggaggcagaacattcgtactatctaaagactgttaagtaagcaaatggcatccgacgttctatttttgccataatattcttgatgtaaa  
aagtcaatctttggcgtatattcgtatcctcagaggtgcaagctatacaatgaatcactggacattgctgtagacaaagccaactgtaacttc  
ccgtgagaagatacacttctcattcttaagtaatgtaaatgtgcttctccgaatctctttcagattagattggttcagatgctctgcacgatttc  
taataaagtaaaagcaacgtctgaaaacttaaaaggttgatataatcatagcgtcaagatcagcatctttcgttaattaatctatcatgg  
aggcttctgctcatgttccaccttcttgaatagaaaagaagtaaatcagagatcagagagtgaacaataaagtttcttctcacgggagtga  
caattaactctcataaatcgacataaaaatcattaaccgtaattccaactcattgaatccgaatcgtacgcgttgcaataatccgtagactc  
ttcatcaaactctgtctcatcacctacaggaggcagatcccattttgattctccaagcagaagcgtaaattcattattacattcatcगतगaa  
tttgactctcaagcagtcgacatagcttctcattcaaactgtaaaatccgccatttaacaaagtgttagacatagtcattttgtatcagggtgat  
tgtgaactaataaaattcatggatccagatacgatagcggaaaaactctctttcatgaacagcttccattaacatattacggaagttacttc  
tcgatgtattccataataaacatctagccaatctaaccgtaaacatccgatagatgagacttataaactcaagggtatccggttgatgcaaa  
tttagaaatagcaagcttctgcaagaccactctgatacgtcgttccgatgcaaccaagtaatctgtcttaagccaaaaattcttgcaaaag  
gagtgcttcatgaactttggttgtttccgaagatataagtaatacttcatgataatcccgtagcattttctctgctgtctatacttcgaaa  
atcaatgaattgatataattgaaggcggtttatttcgaccatgaaattcatgatcaagcaaaactatgcacaataatggaaaaatgaag  
ggaaactctttattccgtatcaataaagatagaccgtactctgtttcttatccagttgtgctaataatcagcaacggcagtgctacca  
caagaagagttgatcgtttcagaattaaataggctgtcgttgaaggcttccaatctatcataccttttctctgataaaaattgagctgtt  
accaaaaggtgaactctcactcatgatcaacgtcctcgtgtaaaaaagccttatgctacttcaatgaaggatccgtaaaaaaattat  
acgaaaaataaagtaatccgacttctcaagatacgtttaaacaatttttctcatactggaatatgtagtacttcatagtaataataactcg  
tcattcattgttgattcattcgtctcatcggtaaggaaaggaaagatgatccatcatattcgaatagtaagtttcagataatcaggaaatttag  
atataatgcataactcatggtatttcatatcttggtagcgttttcaaaggcattgaggggacaagagcagagtgattgcaaaaaatagag  
aagtattacttttttagcaatacgggaaggattcttttctaaaaacaatgattcaaaaatgggagtcaggttccaatctactggcaagcc  
tgaacaaaattgcatagcagcgaagaaacccaaatcattctcaacatctagcgaaggcgataaattattagaaagccgctgaaccaaccgt  
aaaaataactcaatgtgtcttggcacaatcgttgaattatgacatgaacctaataatctctgtgcaaacattgacaagatacacagaatcgaatg  
tgctttctattgaaaccgttcaataataccttatgattccaatccgaggaaagccaacgaagatattgaaatcagttccttagctagacttact  
attaccataataacgtaattcggcttaacaaacctatcaagaaagacaagaataggcaagctggtaaatgcaatgctttaaagattgctatc  
tggttccaatagaccgtaaacgattgtcctaatactatgcacattagagagtaacaaatgtagacgactcgaccatgctgctaataatagtt  
aagataataataacccattgattgaaagccaaaataattgtaagatcaagtcagacattcttctcaagataaataattgctcataaac  
aacgaaaacagaagggttatttttttaagttgctccaatttcttataatagctttaaataaggacaagaaaaaattatggaatccactagattt  
gggaaatcaagttacatcgctattcaaaggacgaagtagatttctcgaactcaatattgctaaggattttgcaacatttagccttgaag  
caagtcttctgaattattgtagaagatacagaaatctggagcataatagctgcgctaacctctggttccagttagaagaaggactaaagaca  
tcggttcaatattgcttctataaatgttaatccattaggataaagagaatgaaagggaattcaaaaaatcgtttttgtaaattgtagatcatt  
attcacaacaaaccgaaagattcaaatctataagttttgaaaaggttcttaaacggaacctatagcttccagttgctgttaaaaggtagttaagt  
acattactccttcttgaattagaaaatttaagagttgtagtaacagttgcgccgattgaaattcaagtatagaccagaaaaacaataaaa  
cgagtcaatacaaaccttctacttcatgattaggaaccacaaagactcaaatctccattactcctttagactttcacgcttagcattaatat  
aagtctgaaatgtaggacttaactgaaaaatgactatgggttcggggtcaagaataaactgtttaaattgctgtttcaaatcatgtacggaaga  
gattcatagatttctcagaaaaatccagtaaaacccatataaaataattctccagtagaagaagagtaccattttcgagcatcactttcga  
atgaaactagtaacttctcagatcagcttctcaagaagggtcaaaaggtacgtgagaatttaataacaacgaaaaatacttaaaaattgaag  
taggtaaacctcatctcgttcgaaagagtagtccatcaagatttttgcgcaatatttgagcgaattcagaactattgactcagaacacatgc  
aacgttgtaaaaatattgataaaatgaagatgagagatacaaaaaatccgagaatcacataaataaataatgttacgaagcccatttcttat  
agttagccatcggtccaattatgctggatatacactatgctatcaatagtttctgtcttctgagtccttatatcatttatagagggtgcagatc

taacaagagtttcgggtctgtacatagaaatcgtcctgaaaatctcatcagctatgtctagcggttgagcatcactactttgaaagatcgagca  
cttttttaaatgaacacaagcagcggagataaagaagaagaagaatcaactcaactaccttatcaccaaggcataatagtttatcggaaacg  
attaccgtagttgtaaagctctagctaaaattaaagcaataggctcctctgaagttcaaaatccttctgataattgtgaattaccgtaaaaacat  
cgttctcaaaatgagcgcagatgaagtatatggctcactttgatggaatgattcatcatatacttaagagtaacatgcagaaagaataaagataca  
agtaactttaatcttccaggctttgtatcttttagtcgagtattatcattcaagccggctaagatcattctcaattgttttctaagattcaac  
tagctttgtagttcttcaactattccattcattttgcatattcggattaacgtgttcattagattgtgaccacgaaaatttagttctgacattga  
gatatgtccaagcatttttaagaaggtgaagcgagtgccgtgtgaagctcattgcaagatcttatggaaagaggtgatactttctgaaatata  
aaaaatgattatgtttataagctcatcaaaaaggcgtggagtacataaaattattaatcgggattaatgtaagatttcgataaattgtgaa  
aatccatcggtgaaaataatgaaagaaccgtactttttcacagaattataaccttcagcaaaaaatagagtgtttccaatattgtaggcct  
cgtgggaaatatccagagcgtgattttcagacattgacataacctgattaaggttaagggaataatttaggaaacgagagaggtgaaaaatag  
aaaataggatagtatatgatagcactgaagaagttcactgtatacaaacccgaattgataaagcaagaatgcttttgagaactggttcag  
acaggactatactataagccttattatagcaaacattagataaaagaataataaccgcaatttgatacactctttctcagctataacaagt  
aattcttagtaaggtcacgtacttttcaggactcaacatggatgaaatggacacgattattgaaagaattgcacagaaaaagaagattcttga  
catccggtgaattaatgcttattaataagcttgaaaaagaatgttgtttctgcgcttcttaggaaaatttgagatggaaacgcatgtaatacaatg  
ttcattaaacacacgacttgagccataaataagtaataaaataaagatccaagtgctcttatccgatacttcataaggaagaaaaaatctg  
ggtggaatagagaagcaaagttccgtttccgttgagtcgcatcgaacataacatagacaagttgaagtgagatacataccgtaaaacttcag  
catactattaagaatatcaaaaagaagatttaacaaatcaaaaactaaagaatgactgagaggaacttaattgcatatagtagacattgacat  
atgggaaacgaagctgctaaacattgcaataacaaactccttagtgtagacctttccatttctgacttatttctaataattggaaaataagctccgt  
gacttgcaatactgcagatcggtcatttagtcacaatataaacgcacattcgataaggcaattcaatgcaggcaagtgagcattagttcttctcatt  
aaaagtctaaaaaagtttgaagaaaacatagcagctcattttgaccagatgaatcggtgcccgaaccaatcattaaaaagttttataactg  
taataactccactatttctgcttaattcggatagatcatgagaccgcatatagatttatcacttttagaactctgtgaagctaacatttcttctc  
actatcactcacgtaggattcatccacgaaactaaggtctccacagctttggagcaataaagcaccatattctgcaatcaataaattgcagatg  
ttgtacatgaggggagtgagaaaataagagatgtaaagattttccaaaatccaaacagactggatcacatattgtacctttgggagaatatgtga  
atctctgaatcaaattcaataatttggattttgagactcagtaaagactagaataaagctttctacatagagtcgaaacaaactgcctaaactttg  
aaaccgatcattatggaagctatagaacctgccttttgggttttgatagttgatttctctcacttcaataaacgcttaaggattcgttgaat  
aaccgagcaatcgttctttaaagtctttctatttctagaataaactataaaagctcgaagttcttcaatggcatcatttctggttttgatttctcag  
gatgaaacctcatcaagaattgagcaaggcggccatagcgtcactatttcttttgaataaataattatagtcattctttaaattcatatgt  
ttaaatacagatacagcagttctggtagtggttagtattttaaagtagacaaaatgagtgatgaactggtagtaccacaacaaagaccggtaat  
aattcactaacgctcatctaatggaatgaaatttctaaagcaataataaaggatgtagttataaacaacaaccagatttatattgatataacta  
aatctgctaataactaaaaagcttgaactgtttcgtaaaataaccacgctccagtttgaattaaaatttttctatataaaacagctatttc  
atggccaaagcttgaacacgagattcagcaacatagctaaagagagcgaacaaaatgaaactcaatccatcttagtataaataattcaatc  
cataccatccgagttacaaatgaccagcatcactagccgtagatagcttttagtatggttgaatcttgatctgcccctgaagtttctgctgc  
acttgttccggtcattattcagataagctccgaaatcagccttctcattgatatttctagattctagattactggaatccgattctttgtaattcg  
taaaaagcttctctgttttctcgttctcactgtcggagctactgtcggagaagcggaaactgaatccaggacgaacataacttctcatatc  
cttaataatcatttcccccttaataatccattcactagtagcaattttagaaccttttctccatcttcaagttcaatttgacgacgattttac  
ataattctacaatctgaggccaatacttttcatgaaagtactcgaattttaaagagcctccaaagtttgtgcaagttgatccataggaacataacg  
atctaaaggtcattaaattgagcttctcgtgtgattggatctataaacggagaaatcaatttaaaaagcccagaccgcccaggggaatt  
gataactaatgccttaccagacgctcaataatgagttgagaatattaaggacttcttaccctggccaaacgcttgattagaccgagagg  
aagaatccctgaagtttaataaagccaatgtttccacgctggtggcatcaagtcgatggcgattcaaggaaatacaccaaatgtcgaatc  
tgcaaaggtgatgtctttgtattttgcctgccagggtacaagtacaagcaggacacatctttatcatacccaacaaaactgcttccgggtg  
gcttttctcctgcactcatcaggatgcatattattgacaccaatgacgacccatacaagtgatctaaatgcgctttttgtagcattg  
gttccactttgtagcacgcaaaaatctcaaaatacattcttttagtttaggaagttttcaacttccgacaagccttctgttttatcggattttgaaga  
aacaggaatgcttttaaatcattacagtaaatgaatacttctttatacatattcctttgtcctttagttaaattctgtcttggtactgaggcgtcaaa  
tgcaatgaggactgggaaatggaagaggagcattcatgaccttcttcaagttcatatggtaatgaaaagttttcatccggttttctgaa  
tgacacatcaacgtttcgaatggtttcgttttgagtcatttctcagcagcaatttgattagattgttctgtatctttgtattgttactcca  
tttattgtagacgagctagaagaacgctcatgcttgattggtcttctgtatacttctcattgtttgctttttgattgtatccgtccgtctctatagg  
tataggtaacaagtttcatgcatgagaacgatgacctaggtgttttagccgacaggaacaaacttttaccgattcaggggtaagaggta  
cagaacgtgtcgattgctgctggaagatcagtagatgtcccttctatttctcaggttcgaagcagaaggttcttattcaatttactagggttc

ttcctttgcttatcatttctcaccaagatcattggcattgggagcagggttaatacctcgctcacagattcctcagcagtagatgccggtttaag  
gattcaggcacgtcactaactttcacagtagtggagaccaatcgtgactctgtcgcatgaaggaattatgactttatcattgaatttgattgaa  
gtgtctcgatggcaaaggtgaagaactaacctcagtaacctgcttcattgtgtcggtcgctcacagaagtgaagcatcattactgtgtcca  
tagtagctacatgaccggtgagagcgggagggtgttgattggctgaggaaccaacgtcggttctaaaaaggaaatgactctgaattcagg  
agtacatgaggagctgtgtctcctgaattgagagggaaaaactcactaaaattcgaacgggaggctgcaaatgaaatgaggctgctgt  
tactgttcttctggaggcctgacaggagtagtttttctttttcttctgggggtacagatgccaagtagaactgcaaatcgacctaga  
ccgttctacgacccgcagagtggtttgtgacattgtataacttaataaaaaactcactacaaaactgaaatagccaaaagtgaagcctataaga  
gaatggttacgattaacgatagattgcacagataataaggatagaccctggaaaactgaaaagagcctaatttactggataatctgcaatgc  
aaactaataagaacgaaagggctaaccttcgaaagctggcaatccaacgtaatttgggtgtttacctaactgtgttcgaaggaaaaaacg  
aagaatgaaagcgtgagaaaaacaggaattaagatgtaaaagcaagcaataagtttacgaattggacattcgaatgacaaccaaagctca  
ctactagttcttaactaaaaaaagacaatagttctgtttattttagatcttccagtgctggatttgaaaaggactccaaattctttg  
taatatccttttcttcgagaattccttccggtcaatttagccagaatacacaagcgtgtatggtagtggatagagcctactaagtagctattg  
tggaaagtatttacgaagaaacggtaaacgctaggctccgtatccgagactatgcagttcacctcgttcgagctccgtaagatcaatctta  
ggtaggtcaacgatgtctaaaaattgtatatttggaccgatagatatgttttcaatattcgaagaccttagagaagttatttctgaaaaag  
aagacgactggcatgaaaattagctttatgacgctggacgacgaacactggactggagtagaaaaagacaaaaagatagttataaaa  
ttaaggagttatcctttgagagagaaagtaatttctgtagaacagcgtttgtactgttgctaaaactgaacaagggtttgtatacatcata  
tctatgttcgtacaaaatcaacgcaggtaagaagttgactgaagtatcaggtttcacagagatgacaaaactgtaaaaatgcataggttcaa  
attattatcgaccgtaaggttcatttcaaaggatgatcgttgcattccacttgcgcagcaggtcactcacatgggtcactttccaacattctga  
cagttctaccggcattcgcgaagcatatcgctagtaacacgcggttagggcgttccatccttataaacggttatttatatggtaaaagg  
aagaatctcctgagagaggaacactaatcagaaactacaatattgcaagaaagtagcacagggtaacgaaccattgttactgtatgtgtaa  
acagaccattctttgcaagagaaatgtaaaaaatagattgtcttctataagaagtattttaaagggtcaattggaagattgactttattt  
acgagcatatccttcatgggtaggaaagcgtgggtatatacttgaatctgaaacgaatgcttctttttctcggcggcgatataagctcttt  
aaacaaggaagaattagcgaataccatttctttttatttctattcattttatttccaaaaagggtcagcaataaaaaatataagaacatgtt  
acctgtctaaaagaaaaacgatccaaactgaaatgcaatcaaccattcttttagaggacacacttttcttctatgctttctaagccatcctt  
tcttacgaaaaggctctttctgggttttagatcgtttgtatgccttctcgggacaatgagtgagctttgtgacttaagagatatatgcatcag  
tggtagcaacgctcactaaaccgttccaaagaagattgtatcgataatataaaaaggaaatccttctctacattgcatttactcggaaagc  
aggctgatgactcaactaggattgcgagtaataatgcacctaaagtctattgatgtcgagcaattgctcctgatctcgaataaaaagatgcctg  
tttctataaaggagtttctcaaaatacctatgataatacgaataaaaaacgtcaccttcgatatagatactcccatacactggaaagccaag  
agaaagtgggatgcctcgggtccaggccaagatccttagggccttctcatcatttctgtatggagattactagtagtgatgaacctatgac  
agggttcagattggcgtgtatgcgggaacaaatcctaagaattatgtaactgataacacatcaatgaaggaggttttgggtcctaaatcg  
tacaccaagagtttctcgatttctgatttctcctcaatataatgattacagttacaacaaaagacttaagggccagggtgttattctcctgc  
tttattgaaatcattaccaagagcctaaaaatcttagtaaaagggtacaaaagccggattttgaattatgaaaaattcaacgagattatcc  
cacgctcaagcccgaagcctatgcctttcagactactttctgagctttgaaagatgtatacggcgatcaattcaccacaattgctgagaag  
atcgacttttgacttaccttaccacgcaatgagcgttctgtatgtggaccactgttttcgaaattcagactgtttcatgaaccggtatatac  
aagaattcaattattctaattttctgactaccgtacggatcaaatccttagttaccttacttctacgaaaagcacggcatctgatagaaata  
aacgttataagacactcccagcagtagtaaaaaagataaagcatttgcattgcttcttctgtatggggagaatgacaaaatgatgattaatt  
ttataaattcagacgattctgtgtaattgtcagagagtgccccatccttcttctgaaatataaagaaataggtctttatgagtgtaagga  
agacttggcagttataatttctatgagttctgtgtatattggcgtttggctccatggacgataccaggttgttattaccagaagtacgactgc  
tttctcagttacatcctcaaatcgaacaaatacgaacaggatcttcttctctgtatcctagtcgttccgtttcaagagatgttctcgaaga  
agtgagaacagactttacacacctggatgcctttgcattcgatgttcatcaacagttgaagttgatgatgcaattcattgagaaaaaaatga  
cgggacttggatgcacatccatagcaaatcctccagcatgattgatctcaatagccctcttattggcttttctgagaaaaacttccagaccgta  
tatttaacgcatattgaaaagaatttattgtaccattggaattgacaaatactatggacgttggatggaacgataggcaaaaagcattaac  
gttagtgctaaatctgaaaaagggtgctgtgctagactcaaaagtcacgcttagctggatagctgtgcaaaagcgtatactttctcctcaagtc  
tgtgtgcctaaaaaagaaagagaatgtaacaatttggcttcttacaagtaggggatcttgaaggagcctgcaatacctgttgatgaccaa  
aagaagtttggaaatttggaaagaatgaaaaagttactggctttagaaaaaggaataatgcttcttctgaccaaccgtcttttccgtgg  
atttattaccagaacaattccagaaactcaataagtgaggtaattccagttattggagcttttcttctatgctttaaagtaaaccttct  
ggtatgaacatgcagaattattggttgcggagtgatggttttagctggcatgttagcgcgaaattcttgacgactatcgtattccaggtatatt  
ccgcggtcaaatgtacccttctcattcgatagctcttactgaaaacttgattcttactccgcgcgagacgaattcggtatggttctttga

agcaagtgtatcctatctcttctgatttgacttcttctcatggcgaccagaaagtctccacattttctctgggtatcaagtctgggttacatgcagtc  
tacgtctcctctctgctgatttacagattgataaaccattatcaaatgcaatgcgtactcttgggggacaaatcaaagttgatttctagagagcaa  
atagaatcaaagctgcctctttatagtttcaggggaaaagtatgaaatacacgagtcgatatactgatcgcttctgggctttggaatatctggcac  
gacttccaaaaataagctaccatttgccatggcatagtgacattgacagacattcaagtgaatactagaagaatttgggcttaaggcaca  
ctcaatgccttaactgggtagaaaaataaccatttaactagacaagcattccgcattgattacgttcagccatttcaaaatcagcttttgttcaat  
cgttgaatataaatctgtatactaggatctatggtttattataatataaataagattaacttttcaattcatattctgtttcattgaaagatcat  
cctcattcaaggttgttgcactaccaacttgcgatgacttgttactagcgaatataacgcgacaaaataaactattcacaatattttatata  
catatttaagtgcagtagtttcaaaaaggataagaaggagcattaattgtcaaaaagaaataattttcttatatttaatttttggag  
atgactagattatagggtcatttagcagaaaaacctgaaatagaagaatattggatgaatcaacgcagcagcaaaagcgaatggaagaatga  
attggaacaggatcaaagctagagaagaatgaccaatttctttactgaaaggttggaaaacttctgatattatgaagtgcgatagtcg  
accgaggcagcaaacgcttcttctgtaacaaagagtcggagatggtagaggatttctaaaattggaaggaatccaatcaaggaaaga  
aaatccaaaatttccgggaataccataacgtctcgggtgcaaaagtcattcaaggagctacatcccagcccaagaaaaacacaagaaggag  
aacattggaagggaataagatcgccgttgggttctttggtcagttatccaaaaagaaaccaattatactttgaaaccttctcagggatt  
gacttggagcgtgcaataaggacgaaagtaagcaatacattaattgagccacggattgcaatttgtgtgccaagaatcaaaaaattgtcttct  
agggttccgggaatcaaaacctgaactgaaatttccgagagcaaataccgaaaaagtagctccatctatggatctatccgtcccgaat  
cctacataatcaagctgttagagcacggatacctcatgtattacggacacctactatggacgtggaatcagttgcatgaaaacaagcata  
ctttgaaaaggattaaggaatcctatgattggagaaaagtggtacgtatttggaaatgtcggagttccacatcagatgcgagtgagaatctt  
gtgactctttgaaagcttggagcctgccgatgaggtataaatgaagatgatgagttcaatggattgaccactccaaagtattcaagtatact  
gaacttccaatatacactaggttttccagagctctaaaggaaaggatgtatgcagtttcaagaaggacactgtaaatgcctcagtttcc  
tttctcaactcataatgatttataagctatggagtagctgttactttgtacattgaatcactggttggatgaacgaaacatttctatgtgtagt  
ttatcgtttatctttacgatgttgggtatgtaattagtttcttctgtaaatgatggataatgatattataatttaggaatttcaatctattgaaa  
cacttttctactgttctctataggtgttctggttaaattgtattttctacctttattgaaaagctggcttactggtgtaatgaggagtcgatgtt  
ctttactgagaagtagcactacactatagacctgcttacttccagtaagcccaaaaaccagaatttattgataaaggcaagaaaaga  
ggaagattaactgaaaccaagttgttataaatatttagctgtgtaaaaaaaattttgatttttaggtgcaattgcatctcctttcagaaaa  
gtcactatagttgagcacaagaagcctagatatactttgtgattctagattgacacgaaatcgtttgcaattgctttattgggtgaaaatta  
cagttcaaaataatgtctgtattcaataagaatggcttatcgagtccttactattcatctcgttactactctttttggctgctttttcaaatgcg  
gaaggatcaccaacgttgggacatttcaagattgtctacctagtcataaggaagcatgatgtccctattttacccgtagcgcgtgtaagcact  
tcgacagacaaaataggcattattatcaagttagggaaatcttactgaaaagataacagtagttggaggttctgggaaaacgtccatgct  
gcgacgatatactctgaaacgtatgccttaggttcgtagtcacaaaaacatccacgaagctctgtgacgctgtgatggatgttcatagctttggt  
gtaccatcaaatgtccctggcctgccggaagtgtatcattcatgatagacattccattggatcaactgttctcgattactccaaatagaaactcac  
gtcacttacaatagactataatagtgacgggactcctgagcggaaattgatagcttgcgtcacattgacttgcgattgtgcttagctactttt  
atcctgtagtcgatatacctcgttattgtcttctgcttcttcaatagtttacgcctcttctcaatcattggactggaagtcttgatccc  
tttagagcattgttcaacttttagtagctcctgatgcttctcgtcaaccgcttgggtttctgattttattggatataatgcaattgtgctgatctac  
gtctcaactgaaatgttgcatttccgaagtttataatattttaggtgtctgtcttggagtagcgttcttttagattccctatcttttctcagtagc  
aacctatcaatttgcagattatacagatttagcaaacgtcgatgatgttcacacagcaatttgtccggatagctatggatggtcttcttctg  
attccttaggcaccaggcaatcttctggtatccatatttaatagtagtgagcagtgatattggtgacgcttattgttggctcttttgataattctgtt  
aaagtgggttatgcaaaaatgttcatgatacaatcgtgaaacgcgctgggatacatggagtttatcggtggctttttattcgaattatttctt  
agcctattttctactatatactgatatgtcttcaatttgggttgaaccaagtggtatgaaataaccggtcctcattttatattcttggatttt  
ttccttggatgtttatactattttgtcatttgcgagccagtttcaagctctttgaggaccaaactattttacaccttttaggttctattataattc  
atatcgggagaagaggctgatgttttgggtgttctgttattgtcaatttatacgtggcattactgttgggtgtccttggagtttctgggtcagctca  
agttacgatataattttcttagaagtagcgaatctagtcgatataaccgtttcggccacattatcctcagacgaacatgaacatattaagctgct  
atttatctatcattcgtctgattatagttttaaagtagccttagtcacgtgatgttctgagtaataagaataagctattgactatacaat  
tctttcatacatgcgcttctatgtcatattttcttaatatcaagtcagcgatttttgaagtaccgcagactcttaggtgcaatagtgaaact  
aaaggagttcccttggatagaccttggatgggctcgcgtttttgttattaatgagttaaaacgcgctcgtgaaaaaatccgatgaaaatagtt  
tgatggcacactgcactctgacaaaacatgcattcattcattggttaactccctcttggcttattctctctacatcaaacacgaatttcta  
gcttgacaattcaacaagcgggaattgaaatgtgaaatcggataatgacctcaaaatccgggtcaggctggtactgaaatagtagtcacca  
atctgccattatctctttcaatgataccgagggtattcattctaccgcctccgaaagtcaatactctgtccgaaagagagacaggatcaat  
tacgcacgttcagtttagacttttgaatgataagccaagtcttcttgcgatgacacgaattatgccgttcggaagccgatgtgtaccatccta

ggttgatgctgacgttgagtcgttatctcagttatcgatgcgatgaatcatagtagacctgacttagccgacctataaccacaaggtaggttagct  
agaacttggcacgtagttcaaaaatgtgttcgaactcttcgagatccacttcggcagaaagagaataacaaggaaaaaggattcgttgttctc  
gtcggcaaggcggatgaccacctcaggtctcaaatcctgagcaaccaaatTTTTgatgaacaagaagtgaagaaaacaaatgacttct  
tccacagaatcccaaagttaaaatagacgctaaattacataaaggacttgaacatttTgtctcttcttcttagttaaatacgttggttcct  
ggggacggacgctattttactattttttgatgctgacttatttctttcttagacatgccagtcattgctatattttcttcatcattgtttatat  
attacctcagctgattttctttgccgaacattcccagacctcaagtaacattttctttcttattcggctttcttgatataatgcctttacg  
gttaaggtaaatgagtggtccgttcttacaatcgttttaaggatctttattttcttcttgaattattttttgtttatactttcttctgttga  
gttttctgtagatgcaacgcaatgtattgtatatccacctgggtctataatcaaaactcttaaggacttaattttttctcacacctagc  
aatgaaatgaaagtccaatgaaatattttgtacgaaagtctaaaagaaaaacgaaatcatttccaaaacctctcataagagccgtcaat  
ggtgaaagtgtttcaaatgtacaaatttgaatcagcctataaatgctaaaccgttaatttttactattcaaggtttctattttacatacattc  
acaaaggttgccttatcgaatattggtcattcttgaacacgattttgtttacatggctggccatttTgtataaataaatgctagtggttctgt  
ggtggagtcttcaacaagagtataaggaacaaatgtttctatgccaacggtaccttccagaaccttttacgagacataaagaattattgaa  
ggatataaacaataacaagaatctttttattgctgcataaaattatagacttacattattttattttattttattttgcttattttgctggct  
tgtacccggacctctcaaatagaatgtcatcgaacatctgttaccagtgttaccctgatgtcagacaaatgtttatataagtgcagcc  
acacataaacttagccttaccattaccggtcactcactgttatccatgtttagaccgttattaaagaacaaaggttagcaaaatggagctt  
cctctcgtccttggccgacagcaagctcaatccgcttTgtttgacactactgctactagtattgctgctagtactatgaaaaatgag  
ttgaatcatcttactggaactgtcaaagatcctgaaactaagaatgctttcaagaaggagatggacaactctttagcttTcaaccgctacttgc  
aagagaatgctaagggtactgagattgactgggatttgggtcaaatctcctaaacctgagcaagtcgttgaatatgacacctgagtgatactact  
ttactcgtgactacttgaacaagctggctgtcttaaagttaaacggtgggttgggtactacgatgggctcgttgggtcccaagctatcattgaagtt  
cgtgaaggaaacagcttctggattgtccgttcgtaaatgagcacttgaatagaaaataatgtgaatgtccctttTgtcttTgatgaactctt  
caactgatgaggctaccgctaaactcattaagaaatataagcacataagattgatattctgactttcaaccaatctcgttccctcgttTcac  
aaagagacttTgctcccgttTgctgactcattTgattctcccacgaccaatggtagcctcctggctcatgggtgatgtttTgaagcacttacaacag  
cggattattgacaagcttctTgctgaaggtaaggaatactTgtttgtagcaacatgacaacttaggtccgctgctggattTgaacatcctaac  
cacatggtTgaacgaaggccgaatatattTggaattgaccaacaaaaccaaggctgacgttaagggtggtacattgattgactatgatgtaa  
cgttcgttTgctgaaattgccaagtctctTcaacatgtaggaatcaagtcattaagaagtttaagtacttcaatacaacaatctTggt  
tccacctctcctcgtcaagcgtTgcttcaaacatgagcttTcaatggaatcattcctaacaacaagactattaagcacaaggcgaaaata  
tcaacattattcaattgaaactgctgctgggtgctgccattcgtcacttcaagaacgctcatgggttaacgtacctagaagacgttctTgctgct  
aagactTgctgactgctcctTgtcaagctgatctattctattaaacctggtaattggacatgaacctcgtcgttTgggtggctgctcctc  
ttgttaagttgggtactcacttcaagaaggtTgctgattTcacctcccattcttagcattcctaagattTggaattagatcatctTcacgatcactg  
gtaattTgaacattggccgtaattTactcttaagggtactgttattattTgtgctagtgcgctaatactatcgatattcctaaggttctgcttga  
aaactgTgttattacgggtaacctcaacatcctTgaacattaaagttctttttcttattTgattaaagtcattgctTgcatggattTcatgtttatga  
ttagctttTgcatgaagtttctTtagttctattTgaaactgtTgttactacgTtagcaagaagatgacgatataatgattctTtacgttcttct  
acgattTgctcacagaatacttagaaggtTcaattattcttattTcatgtaattcaaaaatgTgtcTtagtcaaataatgTaaatattctTgtaa  
tagtaattagactaagtagagagatgTactgaatcTgtagatattTaaactgggagatgttttagtttTcgtataacctaataccttctTcacaagg  
ccggcgcaaatctTatggtaaaaaccgctatattTctaagtctTcacagccaattcacgatcagctTggttaacaacggttaagtagggct  
aaaaagatgttaataaaaaaagtaaaaatcattaatgtttccaataaagaaggaaagaggaaagaacataccggacaaattTcatacgaccaa  
cctTgcccactgctcaacgacaaggtcTgtagagagggcggtattcTctTgaggacaagctTaaagtagcggaaagaaattTcagcattTcta  
gaaactggagaaggaataagcagaatccatggctgctatataattatTgTggaaggcTgctgctcaaaaagaacatcaagggaaaagagaaag  
ctgaccagctgaccaactTctatcatcttTctaaatctattTggatctTgagaagattTtagcgtgctaaccacacatcggaagttTgtaac  
agttTgctagctaatgtagtatcaattTggcgTtacagggggcatgccaggtgcataataccacgatccaatcgatggaatcaagagcatca  
gagagacccaaaggctTaaagaattcataaacagcgtTctTaaactTgtttcgtTgacagtagagttggcaaatTctTaaatagaaagacaa  
gaaaggctcaaaagcagtgggaccaccgacaaccgctgattTcatataggaaattgaaacctttTctacggaatagttgagaaggcatcat  
cgggatcttTcgtTgaggtctacgataagctTgTaaattcatggctTtaccgaaaagttctacagcttctTcaattTcccccaaccgataatg  
gcatcgaactggcgtatgtTctccctgaacgTggccaataattTctctTcaaaaatacagtcatacctTcattaagccagaacattTccaag  
actcattTgTaaacaggtTaccactccaagaatgagcaagttcgtgagcaatgacagagacgttagaacggctccagcgataagagtgaggag  
agcaaatgTcgattggggtttTcatgctccataaggaaaagaaggaggaaggacaacgaagtataacgctccatgctgaaggagtagt  
aagagattcagcagcctTcatgaactTctcatgctatgtTcaactcaactTacaagcaacaatgtTgTcaggctcggTatacacagttgaacg  
aggccaacggaagaagaagcgaggtcaccactTaaagatggaaattaagtaagaaggaatccaagaggtTgtTaaacatgtatacgagag

aatcgttgcggaatcacgggtaccacaggaataaccagatgcaatgacgggaagtttagaacgtatgtggaaggtacagggaaactttacaga  
aggagtgcttggcaaggtagcatagaacgagcgtgaatggcctgacattgagaaaaacatagggagcatttctccaatggtctgttaggct  
ccagaaactgaatcgctgtacattccttagtagagaataattaacgtaaagttgcaacattcacggctgggattggctctggaggaatgat  
gaagggcacatcctaaaaagtcatggcgttcacgatacgaaggaacaggtgtaccatctaaggatacgtccttaacatccaggtaggatgt  
gtctaaaataataggagcagtggtgagaaattcgtgcagcttgaatgttactgcagacacccaaaagaagttcttgcmaaagtcgattc  
agcatctaacagtaaatgttgaatagcaacatcataataattggattgagtggaaggatccaaagaaatcttcattgtccaaacacgtgttcgcta  
taaacgaatcctaaaaaccagaaatacaagagaaagtccttgaacgtacaatgagctaccgaaatcaatctatggtttaaaaactcaaat  
ttaactaccctctattcttttagatgaagaataattgtttatgtttagtggaagacgaggaggtcacatgccgggtgaagtaaggaattaacgac  
ctgttgcattgtctttattctataaaagaaaaacaagaatgtcggaaaaacaacaaagatgtctataagaaaaagaagtaaacacatgcat  
ttgtctattgaactaaaattcaagctctgatgaattcgttgttctgttagagcaattcatgtatcatgtcttctctcttttttaagtcttataa  
accgcagtttcaaacatgtaacaaactaaagatgaagcagtcatttaaaaaattgtgctgaaaataagtgctgttgggctctaagtaatt  
cattcgttttctaactcggatgcaagtaaatctcatatattgtgctggagacacttttcttatgccttcccttgttcttactactatgctgtaa  
ataaaggtgcatgtttttggattcctttctgtttgtaatttctccaattactataatgatattttttttttgtttgatcctgtcacggggataa  
tacaanaaatcattcatgtaattgaaatcgaataaggaatagggtattgtaattgcaattcagaatcttcttgggcttttcttactatgatgat  
gaaacgaaggcctgggtgagtaggaccatgattcttaaggatgaattggcttttcaaaaaatcttaaggaccgaagagtgaatggaaatgat  
tatcttaatttaatacattctcttacaatatgaaaagcatcatgaataacgatcttgaatccatttcatgctgtattatttagaccaggtaa  
catcattatatacaaatgcttttagtcttataattgaggtaatatataataatataaagcttctctagagaccggctgtcatggtagaacctcaag  
ccgctcaagaatgtatatcgagcgggaataaacaattaaatgttatcgttttagtttactacgagatagaagttattaatgttcagggataggt  
taagtcgtaaaaatgcttgaaggcaatcttatttagcctgtacagtggaatattccagctgaaaatcctaactatagactaatgagtaaatatgg  
ttttctaaccttgaaacgtaatcttcttcttcttttataattccttatcacgttttttaagtttgcctacttctgtagtagcgacagttcttaagctt  
atgaatattatataatattcgttacctataacaattgtattttgttcatcttaacgaagtaaccgactgtgacactattaggaccaggtcagttc  
tttagaatgttacaatcaacagctcttggttcgttttctgttctcatggaatagatcctgtgctatatcaatataaacgagcagccagccaagat  
cccggcgtgtaaaagatgcagagacgtatctcaagaatggaagaaagaacctggcttcttggcaaatgtacagtatttttttagataaaca  
aacgatgtcagtttgcggtggcttccatcattcaaatagaaactctattgacgttatttggagaaaaatacaaaagtcgtaagttggattttgga  
cacaacgttgtgctctttaaacttgcgtagcaaacactaactattccaacagatctctgttgcctggagaaagggattcttctgaaataatgctc  
tagctgggtctatacactcagaagaccaactgttgttcaaaatgcttggcttatccagaatagctcgcaagattaccaacggaatggcctt  
gctgttccaggagctaattttagccttcatcaaaactttgatgcccaacaacccatttagcattgcgattactataacctacacatatagtca  
aagccatggctggaaaccggttgcctcaagctaggaaaacattttatgaggttaactccccatcttctttgactttacaaccaattttggattggcat  
cttcccaatggattcattcgttgaactctgtctaccattcgtcggagcaatgtattactctatgcagatttcacgctatgtcctcaagacatgt  
agaagattggtattttcgggtgacaaaacctagtgatagtgtaattcagtagagagatgcttcttttggagcagtttcaacaaaagcttga  
acttactttccaatctctacatgtcgccttcatcatcgagattgatgaccgtatctctgagctattgttggccatggtattctttcaacaagtattt  
ttgatttcttcatattctcatgtttgacagcttcccgtctaccattgactatattccgtccatgtcatggctgttacaggtcgacaagctttt  
ttggcttctccgattcctgagacaatgaaagacttagaaaagcttctcaatgagtttgagagtattcattactattttgagagaaattgagga  
tacaanaatcttctcatcctgaacaatcgcaaaaaatcgtcaatcattcttttaaatgatagacatttctgcttctgcaattcattattacaanaat  
gcttgttcttctgaatccgactttgaggaatggtcagaagatcctgaacaatgggtccttgatcaatccaccaacgacgccgactataacattcgg  
gtaagtcagcttataaattggtgaaattatactaacatagtagccttgcctgaaaactattgaaatgcttattgaccatttccggggagttt  
attcccatcagtttgaagatgctagaatcggttttcattgccatctacattggaagagtcctccagcaagatgctctttatgctctattggta  
ctggtgcaacctcattgaaaggatgttccggttgcgtgactggttgaaaaaggcagctatcccaatttggcgaanaattaccaatggtggagttgc  
tcgcatcttaagaagaaggatatctatctttgtctcaatggatagactacctcctctgatgggcatgatggggtcatatatcatttacg  
cgctattactcaatcgaatgatccctgtaatgactctgtgtacggctcacatctatagattcttgcgagctgtcttggatgattggctgtttcag  
aaagcgttttctgaatgtcaagaatgatctttttacaggttttatcatccataaacgagtttcaaaactttggaaggaaaaacctcaacgttaact  
ttacttggcagcgtactttctgcagctggaactaacatagctcctctggaagaaatgactgcttctcttttaggccagttatggaatgaatgggcta  
gtgagcctatactcgaacaagaattttgggagcttgcactcaatcgtgattgtatgataatgatctgtatttttcaacctatttaggcaattaa  
acataaatcgatacagtttcccgaatgctagctatgattatcaactattgcgtgaatccgagctcctgaaatcgttatgtacgaagcagatgcg  
atggagctttggagttgttttctcagatgttcaagagcttctgaaggtttacgctactcattccacattgttacatcagctttctcaagctacat  
catcccttctttaccttgatgattttgaatgctatcttctacttgaagcggagtcacatcgacaattattcattgaggttctagaaaggttga  
cgagcctttgaaatgacgtgaaaacgatacgttttagctctatgtaaaacacttagtttaataattgaaatgaaatgtaaaagattcttccagga  
atccctgaaccgctctactttgcttctgtttgtcgaaatccatcataagctcagaggtatgcatttgaataggatcaaaaacttaacgtcatata



gaaacatgctcaaacacttgtacagtattcattgctgttatctcgaattggcctatcatttccaaactttataataaacacgtgttggtagacaggc  
taagtgtgtatatgctgttgcaaaactggatttcattggatgaaaaagggtgggcaaaactaatgaacttagttagtattatattacg  
catgctaaagacaggaagctgacagcgttgaattacctccttgcctgacgaatgctgaagaagtgtggaggccttagtccaatcatgcat  
ctttggtttagtgtttaagcgaggttgaggaagacgaacagggagagtaagtataatgtatttcgttatgcaagatttagactgagaaagcta  
acaagcagcgacatctactataaaaatgaagatttccacagttggattctacttggacgagagctcagaggagatgagccggcgtaaaat  
ggtaaggaatatcaaaataatgatggctaacagagtttaggtttggccagagatcctgttcacagtgtagtcaaaagcctttttgtgtccacc  
ttctcagtgtagcaagaaaagaatggaggaccagaattattgaaaaagttacttatccatggggatcctgctctttggatcaaatcaactcca  
tgttataaaagtaaaaacaaatgtgaaatacaaaatattagacaggataggaataaaaagtggaaagcgttactttttgatgtttgatcgtga  
actttgacattacattgtaaggaaagaaaaaagtcagaagatgtaaaataaacacaaaaggatagggccaa  
caacgactttggtttctgaggattcattaaagtaagagatttccgaatggaatgaatcattactaaaaatataacgattggaacctgcaaa  
taaatgaaaagggaaataacctaattgtattgtttatagttgcaaacctgttaaaatacagcattcattatgacaaactatataatagaata  
agattctgtccacataactatattataattcctctttcgaaggaaactattatgtctgttttagacatgggtgaaattgattcaaacgaaacgaaa  
ccaagaatccatttgggattgagaaattttctatggttgtagtaggcgtaaaatcatcagaattcggaaataaaaactttttagaataa  
aaataaacgtgttaaaatccactaagcttggggaagatgtcaacgctgacattttatgaaatcaatcgtcaagaaataaataaaagt  
aaagtgacaagaattccaatgcaatcgataaaactgtaactcagaaaggccagcctgaaaaggaatctactagttcgttctactgaatgtaag  
tcgttattgacgtttttcttgcgacattgcaaaaatcaccgagccagatttcatatctcaaaaagtgcaaaaatcattcaaaataaataat  
aaaagccttctaatagtggaagaactaaagaattcctaattacatactgttcttcaataagccttatcctgatttttactaacaacttt  
tgttttaactcgttactagaatgtccctgtacgtctttttgttcatttttacgtcaaacgaaatctaccgaagcttagcgcacaactctattcatta  
tgacgtagtatgtgaacgtcaaaagcaaggaagccgcatatttatgttcatctttgcgctaaactcagattccctgaaagaaaagaaagaaacg  
cagaagaataagaaaacgctgaatagaagacgaaacagagaatttctggttgagttttcgtgattaatgatatttgggaaagatgttttag  
tagttatatggtaataggaagttgtagtctggcttgaacatcacgggcttgcgagagtgattgcaaaaatcgaagagcataatgtgggacagt  
gttccgacatttcttatactgttacctggctattcaatctgtagcatctgtattgaacggatgattgtacttaataggaacaggatttacacat  
gatgacaatatttacttcttctggagatgattgattccaatctcgaatgcgttatttcttccagactggccatctgtctcttctgtttat  
atatatatatatatttttttactaactattgacctgtagaaccttttacacatcgggagactcaggagaaaatttccattccaggaa  
atgaacactcctgctgctggttaaaaaaggtagagcttagattccaatgaatatacaaccggttgcgaagcgtcatgaaggattccggtaaacc  
agagtcaagtttgaacgctgaggctcattttgatgaaatattagtcctcttccagttgacctaaaaaaaagaaaagaccaatgctga  
gtatgagcgcgtatccaagctatgggtggcaaggctattgctgacgaatcttctggacagcaattcctatttataaaggttagaaaactatacc  
ttgttatcgaaaacaggagatgggtgacatttagcaacgtctataaagccattcaaataccacggcgaaaaagtagccgtcaaaagcgttcaaaag  
ggctatccaattgatcctaataatccgggcccgtcgaaggcgtcgaatctcataacattttaaagaaatccagctgatgcgtcagttcgaca  
tccaaacatcattcaacttttggatttttccagactcccagacttttcttatactgaatagctgaaggaggtgaacttttcatcaattgttc  
gtttaaacttcttcaagagttggccctgatgtatcatacagactgcgcatgctatccgctatcttcatgaagactgtggatggtacatcgc  
gatattaagccggagaactgttttgcacccattgattttatccctcaaaagtaagaaagttccgtgctggtgatctgataaggcagatg  
agggtgaatttgcgggagttgggtggaactattggtcgaatccgttttagctgatttccggctcagtaaggttatctgggattcctaaacca  
gacccctgaggatcaatgggatatactgctcctgaaatgttcgtgatggaagatttccaaaggcgtggatagtgggcgttaggctgtgttcta  
tacactattcttggattccaccttttacgatgaaagcatttcttcttactaacaagttgccatggtgaatacaccttttctcctatggt  
gggatgatatttgaagagtgcaaggacttggttagtcatctgttaactgaaatccggataaccgctatgatattcatcagtttttagcacatcct  
tggattactcaatcagaagagcccacgttccctgagtgatgctcctctatgaataatgaaagtcatttcttacgatgttcccgttttctga  
tgatgggataccctccgctgcacaccaggtgtcaattctttacgtgaggtatatacatctctgatccgctcaccgaatggagcaagaaagatt  
gcggaagcgtggcttccgtggaatcaaggaatgatgaacttttacgacaatataatgaatgaatataagaggaaaggtgagtagtatttagca  
cttctaattgtgagcagccttaaacgaattaatattgcaaatctccacacacagatcgccaaatctgtcacctcaacgaaaaccgctgaga  
atggattaaaggattccaattaatcttctaattgctacctgtataaccgaagacataaacgagaacttcaaccgcatatataagttttact  
gtatatatcaggatgccgtccttaatacattgacgtatgaaacgtgtgacgtaaaataaatttttccctcgcactatttattcttctgtttttt  
aatgattaaatcttatttttaggctggcgtacttgatgtgaaaagttattaatgctgtggttctattggttctattgttctttttgttttaaatat  
gacctccaaaaaagaagttgagcagaccattaataatccgctgatgcaaaaaatcctttttgtaataatccaatgcaaaaatctattata  
acagtttaattgcaaaagatcataatttataaattctcggtgaagtaagggttaaatgtatggacagataagtttaggcgattcctttaa  
atacttacgattcggcataatgattggaatataaggcaatgaagttgaatcagttttgctgtgatctaagaggatattttttttacgaatag  
ggaatattttctttaaacccttttatgggtgacttctagtgtaaaaaaaccaaaagggaactacgatattactcaagagttt  
gtaccaattgattgtattttcacgtttattttggcttctgttttaggtggcatcgtaaaacagcatactcgttagtattatagcaagtaatattgat

aaaattgatacttctttgggcacgaatthggatcaataaaatccagtaaggccacggagaaaagcactgtatgtgatcggttaatcagaactc  
ttataagcgaatattacacaaaagaatacattacatagcctgttacttttataagcaatacgcttttcaataaacagcttgaatgagatgaat  
gctgaatgaaaaatactagaagatttaatacaaaagcttgtttcctcagagagagatctcagcagcttaagcagtcgaaaaacgtatacatt  
gttactgatcgctcagatagatagaaggaaactggcttcttctgataattattaattgcatthttaaaggtgaattattatcattaagacatgttg  
aattacaaaggcggttaccgagcttctaatgcatataattataacgtttctgctcctggaaacttgatcgaaccaacaacaacttgaaaagga  
tattgaaatgtcgaaggaaatgaagtaaacgatgatgtggaatcattaatggcttcttggatcaattgggagtcgaaaacgctgaatcagag  
tcgaaaccagaacagaagattccacagaaagcaatcatcaggtgcatcctgctgagaacgagaaggagatcttgatttcttagatgaattag  
aaaacgacaaacgtgaacagctataaaagaaccttcaacgggtctacacaggaaccgtcgaaactccaacactccagctgagccaaaag  
agaaactaaagaacgagccttctcataaccaacctccgaggggccaataatccaaaataaaaagggggaatgaaaaaccaaaagaggat  
accaagaacaattggttgggtgattatggcaagtgctcccgagccgttctgctcgcagaacagcatgttctgtatgaagaatctgaagaa  
acaactcattgggataatcatgttcgaaaaatgatggactgaataagcttgtaaggagctatcatatagagttttaggttgtaactagtct  
gtttcaggagacattggaatgggattcgagcaaacgttaccgacattgagtaatacctccataacgtaataacgttgttctcccctatcc  
aggatcatgaaatcctgcaggttacggttttcatgatttagctgggtttctcatgttgatcgaattttacgatagtttgataatgtaaaggaat  
tcttattacgctgtatagatttaacaataactaattatcttaggttatgtctcaagtagagggtggtgacttgacgggtttattggacaaagaggc  
caaggtacgaagcaggactagcattgtatgagaatttgcctcatgtaacggctctattggaagcaaaaaagcttgcgaaggaaaattggca  
gaaccactgcagcatgcaaaaaagcttgcgaagaatcgattccaacgaaaagtcggcagaggaaaacaaccagcatgcagaaggatcctct  
gttagggttacgcagcttttttgcgattcaagcattacaacgaagtgaaagaaatcagacacggagcagcttgtttttgttatacttgaa  
ggatgtcagtcagctggaatthtactactccaacctattcctctagaatggcatcagtggtgctggatgatcgctatatcaaatgtttgg  
tcccactgctattctcctaataatgggctgttcagtgactgaaaactgtatatcttctgctgaggtatccttgcaaaatgtatacctccaac  
gcatggctctggcgatccagcactcttgcacacctggacaatagacaaggagaagaagaaaaagaacagcaatctgcttactatgacggtt  
ggctctacgtaagcatgaatacgtacgtatgcaaaatthtgtttgtaaatctgaaagaaactgatgtttgtatgtgaaatgaagattatcgga  
agctcaatthtgttcatcattgtcttattatagtcagtaataatgggggtggggatgttttctccaaacggaaatgaataccatcaacgttgtt  
gtctatttaattthcaaatthtaggtcattgttataaagatcattctgtactctggatcaaagtctatattatcattttatcctcatgattcatcaa  
cattctctgactgttctatagccagagtaaagcttgcgtccttagactccacctattcacctatcattcaactgttataaatactgttta  
aaaaacagaactgatggcactaatttaggtatataatacactatggtttttacaaaatggtaaggctggatggctctaccacattgtttgag  
agtattttcacaagatacacagcttctttccttaatagaaagagaatcaggagccttactactactacaataccttacttgcgatacagttgac  
agaacgaacagtgctgcttattgatgttaagaatacataacattccatagtgccatcctacggcagctggtatggtgatggcatggttctactt  
tagaaagaaaaaaatacaaaaaatctaaaatthtataaaatagattcatctggtgtttatagaagaatcgattggttttctgttgc  
gtttattatcatcccgttactgttattaactggaacctaaaagagtaaatatgattggaggggtaaaaggggagtaagggggcctaagaacgc  
aagctcaagccactgttactactgtgcctcacggaacaaacgtgacgtgtatthtgcacgaaatacatatataatcgaaggtaagctg  
ctgtatactcgaatcaactacgatttagtcacccggtgtatatacctataccgattttcattcatttttctttaaagcgttctttgcataatgctt  
tccgtccggatttttagttgttctgcccagcgttttgcgctaagctatccaatthtccctgaaaagggcactgtttggacgtctggcgaga  
caaatagcttctggactcctgtaacaccgaccccagtaaaatcaatgttgtttgtaaacatgataactggcctaacagaaaataaacc  
ttggtaccgtcgaacatccaaggaacacttagatactgatattagtttctcctctgaccttctacttctggatggcaaatthtacctcaacaggtt  
gatgatataaacactggttattggcccaatccgaggagttcagatcaaggggtgaccagaaggttgcattcaatthtcatcagtgaggatc  
gtttctagcacttctccagcacttctccagctctactcctgcttctccagcagcggcttcttggcagctcctctggcttcttctgctccttctc  
ttccttagcagcagtgctagcttctcgtcctgttttcttctcctcactgtcatcgcctcactagtggtccttctaccacctcttacctctgcag  
tcgaaagacatgagtggttagcagcagtggttagtggttagggcagcagcagtggttcttactagttcttctggttccggttctccaactcaa  
agggtaactctagctcagcggcagttcctctgacttctccggtgttctgctgtggtgactaagcttctgttctgcttctgcttctgagttgctg  
ctcttagcttttagcttaagctcaaggcagatgataactgtcctcgaaaaaagtcagtcgtaattccgtaggatgactggttaataaggaag  
acagcgttttactgttctttgcacattttcatttaacttaccattgtcgcacatctattcatctatcatgtttttgatcttttgatggtgattgaattaat  
ggtattggtctatcattgtttttatcttattcagattttataaagtctccaatthtgcattttttgaaactattggattgttttaacattcatcgt  
ggaagaacctgtcaaggttcttcttgggttgcataatthtataatcatatataatgtcctagttatcattacgctagtagttatagctgatttaa  
ttatcactactcattgcatattttataataatthtataacggagaacagtaaaactgtaaataaaaaagctgtaaacagtagcatattgtcaagaa  
tttcggcaggtagttggaaaaaatagtttaactccaaggcgagactgaaactcgaaccttctgataacctcataagagtcagacgctcctaac  
cgattgagctaccgggacgtgttagtattcggttgaacaataatcataatcatatataatthtactgatctgaacgatgcttattthtgaagcatac  
tttctacgagtgctggcatgatgagtaggccaatccgacatggcttttataactagacggctccaagtgataatgtattctatgacgaataat  
acgactaaacaactgctcattaagataaaaaatgaacgaaaacgaatgatagcctacaatcaaatggatcaagagactccataaaaaattht

tgaattttacatttacaagaaaaaacaataaatttaaattaaacgaataattttagcgaattttgattcgtttgtaagaattttcatttcgtct  
tagtccaaaaagcagtcacacttttactggaaacactgtcaaactgaaacacacaaagactttgctcttccaacaccaaaccagcagtt  
aattctacacaaaatgctcgtggacgcggtgcagcttccggtactaagtacagaatgaccttgggtcttccggtcaagccatcttgaactgtct  
gataactctgggtccaagaacctttacattgtttccgttttccggtactggcgtcgtcttaactcgttccctgctgcaagctgtgggtgatgacatt  
ctttacgaaaagtaataacttttgggtacatttcgttattggagatatctccatgaacgaaaattcagacctggaagctttactatcgttgatag  
cttagggaaattgacaactaacgtcttttagatatgattcttctaccgtcaagaagggttaagcctgacttgcgtaagaagatcatgctgctatt  
gttctcgtcaacgcaaggcctggcggcgaaggacgggttttcttacttccaagataatgctgggtcatcgtcaacccaagggtgaaatg  
aagggtctgcatcactggctccgctcgaaggagtcgctgacctttggcccgtattgcttcaacccggcactgtcgttaacaagttaat  
aaaaataccgagcattttatataaaaaatttcttctcgttggtagttaaataaactaagcatttttagctagaattacaagttgtaag  
cagaagatcgtctcacatgtacatccaacctcattagcgggtcattatgaatattttgtaattgcaaaaagagaaatagaataataattattct  
atacaaaagtactacaaatacacggaaattaggaaccattattttggagaaacttcttaaatcagctagcaagcttttctcaatttttttagca  
tgccttaagtccaattccactagtggaaatgataaacaagccaatttccatttctaatcgtacattttcaataagtctggaatggggagactcca  
tctgatgttgcaacgtaggatttagtaaaacatcaaaaagccgattccagagttcttgggtccaatatcttctatccgctgagtcataacctgccc  
tctctgaccgcccgaatagcaagtttctcaataattgtccaaaaagcatagtgtaataatagcggctagtcctgataatcaacttgatc  
gtccatgggtcaccttcacgatttctatacaatcttgagagtcagtttccagtttgccataaattttgttttaggatcaacaaagacatatcaag  
acctctacaaaatcaattaaaaaattcctttgaagaccaaccgcaaaaacctcaggggagtaggaagcgtcccattctatatcattcactg  
cttccaagcgtagcaacgcattgtctgccttcaatccccgtgtataattgggtgtaagcaacccctcaacgattctaaaaagttctatcgagaa  
aaagaatactagcatctcatcaattcctggtacagaactagagggtttcgtaatgaattaccaagccaagaccgatcctgtggggcagataatc  
cattaacaaatggcttattccgatacatacaaatagtagacgggaagtatagaacctacatcttagtaccgctcatccttctcgagcttc  
agtgtcaataatattcaagtgaagaagcaggagtcctatttttaatgcatacaactataatcaacggtatcatttctcttctcagatagctc  
attttcaagggaagtccttagcaagataaacaggagcaaaaagctccttcccagtttacttatgatccaagttttacgttggaggataagtc  
agaggaaaagtggggctatttaataaactaagacgagtgctgttacttcttaccacgccactaggcgtagtccttgggttagaacaacaaa  
gactcaatagcttctatcatagtaaaattactatcgtatctcatgatagtttcatcagatcttaagtaggggcctagtgcatggtataagcagtcgc  
gtagcgggtgatcaggggatggataatagtaggtaaaaggagtagaacaggatgctctaaaggttattcataaccagcgaatcatgttcatga  
atattcgtaaaaggtcattttgtagtaggggttactgtatgaagttcgtgttttcttaaggaaaacatgggctgctcatcaaggaaaggaa  
tagagccataatggtttctataagtcattgaaggagagagccgacaatgttctcctcgttttgcgttactcgaatcgctggaagagacgact  
cattaacaaaggtatctgctggaatccagaaaataattgggaattttgcgggtgaatgggctaattggctttatacactctgttctcataagggt  
atcaacagaatgactaggtactgctgaaggtgggcaagttgtttgtagcttctttacggagaaagctcattaatgaaatcgttttgttaca  
ttattcggactaccaaagtcggaagagtgatttgggttcggagactcggaggcgtctgttgagtttcagaacgggagaggttggtaaaaagatcc  
attatatcagccaaagcagctttgtatggatagtgaggagaagaaggttcaaagcgggctttggagaaagtgcaacaggtgttaaaacatcaa  
acacttcttttgggggttgggtcgaaggttcttttggaaagaggacaaaggacgatcggtaggaacaggaaaggattgggattcaggagct  
tgcaatgaagaggaaagcgaagcaaaaataacgttcagctctatattcttccattgacttttctgcccgttctatacaaaacagggaatgaaa  
gccgatactcaattcgtttccagaagtagcgtcataaaatagaggaaaggttggaccttgttccaataacattggaaggtggaactgtcaat  
gcagtggaataagatgttcagaacgaggagtaggggcatcagaatataattggaaaggttctgctgcatgaggaacaccattattctgtacggt  
agataattttcagaagtggaagttgcatctgtactggcttttctcaagatagtttctaggcggaggaaatgggtgctcataaggaagcagattcc  
aaagatataattttcatctgataacttttcaataagcattgtagacatttgagaagtcggaggcatggcgaagaagcaggttaattggacgagcc  
tctcgagatacaccagctcgaataactactgaagcttctccatcgtcgcatacgaactaacaagaggatatactctcatagataaggctaatt  
ccatccaatacgtttgcttgaatgataaaattcttgagcagcgtcagggaacgtctccggagaagcacataatcgatgaattttggcaagcc  
aaattcgtaaatgctggacgtcgttttagcaaacccgcattttccaagtaagcaagagcatcttcaaaccttcggtaatgttctcctttaaag  
tattgttagaccctagccattccacgcagcgtatacaaacatccacaggatcgtctaatcatcaataactttagcttctcctgaaagacagcg  
aaagttgtctcctcaaacggttcttaggggttcaacggttgggttattccagaaatcgttactcacaatcttatctccgaagagtg  
cattcgggcataatttaatacgtcgaagcattgacccgtatcaaggacgggaaatgatcgcaggtgacggtgtaccggatgtttccttta  
actactgaattaatcaactgtggtcaagcaatgtaagatttctggcgaatacagcaggagtgctgattataccaagaagggtcaacttaacaat  
aaatgcaaaagtggaattgtagctgatttttaattcttcttaacttctttcacctaagaagacaagtagagcattcaggtttgtggttggaa  
aaaatcacagcaatgcttattatatttttagagggacttcaataatgattcttgggaaaacaacaaaaaaagaagagaggaagag  
aggaaagaatagaaggaataataaaacagaactcgtagactgactggtacatacgtgacgcaataaactacatcaataatacagctatg  
tttctataagaggttggcatttctgttcaaaactaaagttactcaggtataaagagggaactcatattttagaactgaataaaacaattctcat  
actagaagacactgatgacttggattttcatagttaacataaagatgatttttctacagcattaggttaggaaacaaaaccgattatttctctg

ctgaagaaaaacacaaaaacgacaccagcaggattgaaacctgcgcgaggagaccgaatagatttctagtctatcccttaaccactcaggc  
atagtgtctattgtgtgttacgatcaggaattgtagtttctattaggttttaaaattatttaccctctttgatgagttactcaatcatgtatcaaca  
taaggcatgcaagcatccttcgagtcgttctcaatccctctatctcatggtcgttctgaacggacgaattcaatcgtacgtaataaaaatag  
cagatacgcatacagtccttcgcatgttcagttgcattttgggatacaaaacaaaatcaaaagcaatagccttcgaggagaagactatgaattaa  
aaaggaattaaaaaggaaagaaccagaacaaaagaaaagaaaagaaaattagaaaaaagggaatcagaggaaaccgtactcaaaaa  
agattggcaaaaactcaaaacaaacaaaaataatcctttttctggagatgcaaaaggaatagatttaatgggacatgaactgatggtca  
ataagaataactttgatggaagttcaatagaggaaaaaggtaacaaaatgactgggaagcagtttcgtaaaagcatttgatacatccaaggata  
ctcgtttcatcttctactcctaaactgaattgagatcctgttttagcattccttcatatgaagcgaagctcgggagtttagaaagaatgctgtttgga  
atgcttctgaaatgcatatgtttgctaatcgaaaaggacaaaactctacctaatttacctgttcaggatgtatgtttgtttacacatcaagta  
aacaacatgaaacgaatgtagaagaccatccacaggagaataaaaagattaatctgatttctctagaggtaaaacaaaaagagaagcctac  
agcaccgggattcccatgttctcaaccatagtaactaacgaggccctcagacgcttaactcagtgatcggacgggaactggtgtttcgcct  
aggtatggcctgtagacaatttcttaaaaattgaataattagtaactaaaggcaaggactctaaatgggtgctgttttagtggtatgtttgtgatc  
atctgaattaaaaacttattcaaatctaatcttactacttgataatcccttaagtcaagttatggagtctattcaaaactgtaatccacat  
atgatcttctcatatagctcaccctgggacaaaacttgctgatctatgttctcaaaaataatgaattggaaccttcacaatagtaaacattaacatt  
tgaacaaaaaaatgtttgctgagatgttccccggattatgagatacttctaaaaaggactgcagatagtgtaactatcattccttctgtgt  
tatctataaaagtatgtcttattgtgtcaggggatgatcaataacagaatcgcgtattattcttttaccctctaccaaacagcacctttgta  
tatagcttaattggaacgatcagaacagaatatatgaattgaaaattgaagaatatgaaggataacatcaattgaaaagaattaactggtaa  
agtttaacattgtgaagagagctatgaaacataaataataatattacgcgctgttttagggaaagaacagttctttgagttaaaattatgctgt  
attcaattgctggatttctcaacttcaattcgtttctatcatagtgaccaatacctcagaaaagacataaattttctttatcgtggtagagcaaaa  
ataaatgtcttgaacttaaacgcttaaaagtgtacaattatctacctcgcctacaactggagacggcgtgtaagttgaaaagtagaagttcatg  
ctttcactcgtgtttttcgttatctattacatagtttatggctttttgtttatcgtacccttctgcttttgggtgtgtttgtttcttcaactact  
caaaagcaatgcaaaatgaactcctgtttcaatttttagagcatgattatcgcaacctaggtgtcctcaagtcgaattgaaattatgggaaaaat  
aatacaaaaactctgtataaaacaaaaaaacactttttcagaagtaattacatcacggctcaatgttttctgtcattctaaatgcagcca  
ctctccgttagatgatattgttacttacctcttcttcttcttccctacctaaccgggctttatttaccgaaaatacttatgtctaaactggat  
attccgactaatgacatctagaatcttactttcaccactcatattagacatagccaaacacgtgcaatgcttcttactgtctatttagatttga  
gttctatataaagtctttggtaagagcgttaaagttgtttggtaacagtgattctctataaaaaatcgtccaatattcgtggaacgtgagaaatca  
cgacgaactacggttgaaaaaggttataggcctcgtcctaatagcagtttgaattgcatacggcttatactcttgcataaaaaaaacaa  
aaaaaactataacgtgatccctatttaaagttgatgaaatcaacagaattctaaatatttatacaacgtttcatttaactggcgtcatattcaat  
cccccaagttcaagtcattttataaagattcggctttcataacgttttctactgagttgtttgtttcccttagtgaatcaatggcagtaacaattccc  
tctcatttctgtaagaggcatcaagtttctcggagcgaagcgaatctcgtgcttaccctgttctgactcaggaatttcatcatctcttctctt  
tcactttcaaaaaaacgtatattgaacgaggtgtgagaaacttgcaatagcctcgttttgcactgtatcaaggctcgcagactaagaggc  
gcaatctcaaaggctattttcaaagcaatacagtgccaaaagcaattccgattcaatctcgtcaggtgtcggttctagagggaactcccaac  
aagtataaagatacggctattttgggtataagcctaattgctttgcccggaaaagaaagaaagaaagaaagtaattgactgctccgaaatga  
acggaaatcaattcctgatgggtcaattgaagacgaggatatacgttttatgatcatatagggttagatgactattacttcaaatggaacctatg  
gaagcgtatcgtgaacatattgaaatcattatgctgctaaagtagctgctcgtcgtctcatgcaagagaagaactcaatattcacgttaaaaat  
gagaatgatgactccgctatttattggatagtgctcctgttacacagatggaattggataaatctcatgaaatagaacaggccatttcaagcgtt  
acttggataaccaaaagatgatgccccgtctttcgccttgagtcattcacctcaaccgccaacattgaccgtgctagtacagaaaatttaacat  
tcacaccttctcgtgacaaaatgtaatttattgacccctcaacagtatatcttctcaacagagattcccaaaattgcttgggttcagacaaa  
cgtttttggaaaaggcctccgagcaaaactattcaaatgtacaaaacgtaattggataaccgtgtaactcgtttcgggtcccgtgtgtgtttga  
gcatcaacagcgttctgaaatccgtttggttatcggttatcgtcgtggatccattatgagatacttcttcaatctcaaatctgctccgctactcgg  
tttcttctcatttgaacatatattgagcaatttagtaatgggtgaaccatcatcagttacaactttaaactgaaagtttaagaatgcagccagttc  
ttcctctgttggagcctttcgtacaaattacaaggaagcttcttttatactgtttaccttatactgatcattcattgttcacgtcttcaag  
ttatccatccaagaggttgcctacgctcatagtgccgtgtatttctgagcatgtaataagccttggcagcgaatacaagtttatcagctat  
tcttgaccattcaaatcacctcatgttgagattttggacacaattaagcggcctgtcagttcttgcgtttactcgtactaagatccatgatataat  
agttaaatctcctcaactggttcgcatgatgttcgatcaattctactccaacattctatcggaactggatcttctcagctctacaccgtgctaagc  
ctgatcttcatccaatctctagaccacaattcataactgagatatctaccgagaaactatggaactattcagaaaactgtgtaaacgatga  
agacgtatccgttatggaatgtttgtaaaatataatcatctataaaaacgaacttttcttaactcaaaaagtcgcttaagtttccggttga  
cccttcaatttttagaccaagctcaattggagatcctctatcgtctatgatcatgtctgtcggttaatgaattcagaggtttccatttgcgcttagaga

cggtgctcgtggggaatccgtttgatcaaatctgcaaattccgaggcttctaataatgctcgtggactgttgatgaaaactataattggcta  
atacgcagatgctcaagaataaagacatacctgaggagggtccaaaagggtattcttttgatctcaagatcaagataagcctgcattggctt  
tccaaaaatatattgacagcatcgttgattgctaattccaaatgaacaagagcaaatagtggacaagtacggtaagccggaaatattatcatg  
ggacctgatgagaatactgctgatttgtagactgggcaaccttccatgcacgtaatcgtaaagctccttggtggaatctttctaccggaaa  
agccctagatgggaggtattccacatgataaatatggaatgacttcccttcagttcgtcgttatgtggaaggcatctatagaaaatgaaatcgc  
atccaaccaagttaagtaaaatccagactggagggtccgatgggtattgggttctaataaaactttccaatgaaaattatattgctgga  
ttgatggaagtgggttatctatgatccggctggctgaataaatcagaactttgcgcttagccaacgagagaaaagatgattgatcactttgatac  
cgtaagcttagtctgaaggctacagggttagtcaaagataacaatgtagacttccgaacggggaagttgtaacaatggaaccactttcc  
gaaatactgctcatcttcttataaggcagatgtgttcgcttctgtgggagctcctgggtccataaacatcaacaatgttgatcaactaataat  
gaagctggaaaacctaaaatcaaaacttgggtggaaggagctaatactatcgtaactcaagatccaagactgttttagaaaaagcaggagtag  
ttgtattcgtgatcttccgcaacaagggtgggtgacatctagctcattagaagtttagcatccttctttgacgatcctcctttatagaga  
atatgtcgtcgtgatggaaaagaaccagcattttcacggattatgtaatgaagtgaagagataattcaggaaaatccaacatggagttt  
gaaatgctttgggagaccataaaaagcaaaagataacttacaccagcctgagtagtaagctttctgaattgattgtcaagttggataatgagatt  
tacaatatgaaaagttatggtccaataaacaattccggaatcttacctagccaaagcaattccaagactctccagaaaagattggacttag  
tcaataattgaaagagtccgaagcatactgcgctcttttctcaaaaacttagctagctattcgtttatcgctataccacttccgggagatc  
ccttcgcttcttgattttatttctactgaactagctaaagttcatgcttaaattatactgtgctgatacttcaaaaatctcaaaattcgttctgt  
tactgagtcagtaagaaagcttttttttcttctatttagtctttgtttttttgttactcttataattttagatacaaaattattacggtaaaggaat  
atttcaccattaacaaaaagaataatgaataatgattgaagaaatactttggagtaaccgagatttgaagatcatgagaagtaactaga  
taaattgtaaaaccaatataatggaaggggaaaaatataatagaaaagttaaaactgaattatcagctcataatcaaaaaatgaaagttga  
ttaattgtgtacaatgaattgactgtcagattgctttgtttcatggtcaaaagtaggtgcaaaagcaaatgcttacagactctagtgtataata  
agataaatcatatacaaaacaggattagtaagaaacagagttcattttcgggtcttcttttcagtactaagtaattataattttttgtcat  
aagctttcctgattcatattcccctagatacctaaaactaaatcatacaaatcaagaccaaacgtagaccccagatgcccgtaaatcaatta  
ttccttacctcgttcttccgaaaccggttcttcttttagggaggatgatgtcgaagtaactcatcttttcttctttgattttttgtctggca  
acctgttcggaagaggaggaagaggtaggcctgtttgtcttctccttcttattcattgagaggagatcagccttctttcagagaaaag  
ctgtgcaatttctctgctaaagatcaatatccgctgatgtagtttctccaactcttccgaccaaccaagcatttcaaaagtaaacggatgca  
ttcacaatcacctaatacaataatgctttttgctcctcctcaaaagtcaccggccacctcagattaatcaaaacacgttcaaatgtcggaaac  
aacttcaggcaattcagcaaaaggatgaacaagcaaaactcgttcaacgacgagtgccatgtcgcagttcatcgtgtcatcttccatttctcaaa  
aaaaccgagaaggagcttcttccataaaacgtaactattgggtttattaagcccttacaatgtacacatttaggtacttctttgcttgatgag  
gatcttacctattccgtgcacactataaaaggttagcctggagcaatctcgttatctcgtaccggttggtaacattctatacagcggctatactgga  
aagaacctgagcttccactaagtagtctcgggaacaccagctaactcgttcaaaagatcgatgtttgtgtataacatttttcagcaacccttg  
tcgtgaagcaaacgaataaaataatgggtgatgtgggtcgaattttctggcatcaattcgatgccaattcgtaaaatggacgaggattttcc  
gaaaatagaaaggctactcagttagagcgattgcagcaaaaccaatggaacatacacaatcagcctccgataaggagggtcaaatctaa  
tagagttagattaaggcttctcatgaaagtattataacttttcttacctctgtaaatatttagatataccagtctcaggggctgaaaattgtaa  
ccattaccactcgacattgtaactcaatgtgtataccttcgaaaatcagggattccagcagcagtaactaattctgctcctaccataacacatatt  
ggttacttttccattgttaacatatgtttcaccaatgaaatccacttcagatcttaacaaacttcttcttttataaagacgcaatctttcca  
agttttgtgagcattttatcgcgtggattttgtaataatccatttttcttaaatattgccttctaactgttcttttcaaatcacgcttcaaatccg  
tttcaaaaagacgtgatatacataaacttccctaatttactcaattggacgctatagatccaaaatcgctgttttctactatattccagtgttctg  
gtttgttacgaaaagcgtagaaggttagcattttcaaaagatgaattttaggagcgttaacgaaaatcattatacttagccacgtcataggagt  
ataactaaaggtttcgttagcattccctagttttcgataaaaatctttcaaaatggaaatagagttcgtaaccttttccattttcaactgtttac  
gtcttacacagtaccaactacattgcaaaaaatacagaataactaggcggtaaagacacgatatttagatgaaacaaaggtttccgctttaga  
tataccgcaattgggtcagagttgcgagaggaatattggatgtcgtttaaataatattcatgacttgaactcgcgtacattttgttgaagttg  
gaaaacaggtaatatattcatatattgtaagtataatgtaatacgaatgaaatgtaggacaaaaatactctggttatcgaagtggtattc  
gtgtcacttgacgaagttcaacgcgaaaatgcccaacttctggattgtcacaacactccgtaaacacatcaagtcaggcggttaaccaatg  
tgtcgaacttgacaccgacctgttctgtgtttacttttgggtggaggagaaaatgaccaagatccttcatggacatactatctgtttgtgagttt  
tcgagccggaacatctgctacttgatggctctcataagattctaaagtttattacgctggttacgttcgataagaaccaagttctacgtgttgg  
caacattataatctgatcaagccggttaacgcacaatattgggcaaccagcaaaagatgctcagatgactgctgaaaatgactcaactatt  
ggaagaagtggtgagacttccaaggcgagagactagctgcttccaaaagccgaatggcaaacagcctaaaccattacccttctgtaaggc  
actaacagttcgcctaggagatggttaatgatttagtagagcactgcattcgacaatcaaaactggatccttacttccagctgatcagttaag

gccaatgaagacaaaaaagaaagagctgctctccgctttccaagccgctgatggattctatcttcaatggtaaaaccaccagtgaaggttacat  
atthtcaactcagcaaaagcattcttgctgatctctgttcttaacaaagaagagaggaaggatgtactcatgtatgaagacttccatctttcaag  
ccctgcaattgatgcaagcaaacggtgtgttagcgaatttctgttacaatgaatgtgttgatgaatthtcttctttggagacacaaaaat  
ggaaaaagggtctatgaccgtgttatgaccgtgaacgtcgaatccattcagcaaaagatgaacaagaaaaaataagaatctacaaga  
agttcaacatgtctcagccaccaaggctcaggctatcgaatgaattccgaattggtagaagccattgcttctgatatcagcaatctttaaacca  
aggaatggattggttagatattgagaaactcatacagggtcaaaaaagaagaagtcggtgctgtgctgtagtcttctttaaactaaaaa  
taacgcggtaaatataatgcttccaaccccaatacaccattggacgctgtagacgatattatgcttttcagacgaagatgagtcagaagctg  
aatcttcaatcaggctaagcaagaagcgtcaagattgtgtcgaatagactgtctctaggtgcttatgctaagctcgcaggcaatatgaga  
aacgtcgagaggccatcgtcaagaactaaaactttggaagcttctcaagggtttgaaaaatactcaaaggagaattgatcaagactgaa  
gcgctcaacaaatgctgagaacaaagaatcttccaaccagaaaagcctttttcttgaaaagttcattggttttcttctgaagggtatattg  
taattggaggacgagacgctcaacagaatgaattactgtttgcaagatattgcaataaaggtgatgctttgtatgctgctgattaccgaaatctt  
catagtaattgtgaagaatcgaacgcaaatgacccttaccctccgaataccttgaacaagcaggctcattggcgtagcttcttcaaaggctt  
ggactcaagacggttatttagcgttgggtgggtcaaatgaacaagtctcaaaaacaggatagcagggtgatgttctgagctggaagtttgc  
tattcaggttctaaaaactatctaccccaaggttcttactatgggttatggtatattaggtttagacgaacaaagcaggaacgtcgtgc  
aagaaacgtgccgaattagaactggaagatacgaacaagaatctctgaactaaagtgatgtgggtttgaaagctgaaatctcaaccaa  
aggaagaagctttgtccaagtgtaactgaatcaaaagacagtttgatgaaacaccacgtgaaagctcaaaatacaaaatgttttgacctg  
atgttcacattgtgagcgaacagaggtaaaagaggttccaaccgataacggctaaaaaacctccgcaaaagagagaagagaagctcgt  
aagaaaagacgagaaactgattggaagaatcatctaagaaccagtttccattgaagatgctcagatcctcaagcaatctggctatctaa  
aacaaaagaaaaagaagaatcaacggagacacatcaacactgaagctgagaagccagaagctcaaaagagaagaagatgaatcaaac  
ctgaggatgctgacaaaaatcagagaatacgtctaaagaggtaaaagagactactcatgataaggatgatcaagcgacattgaagcctcaa  
gatcagagaaaaagcataagcaagcaaaatagaactgaaagatattgtcaagagttgacgaagaaatggtatattgctcagatgctttaa  
accaaccagatgctacagatactattgtcaatgtagtaccacatttccccttatagtgctgagtgccaagtccaactgaaagtcaagtaac  
gccgggatctgcaaaagttgtaaatctgccgagaatcgattgcatacttcaaaaagcccttgggaaaccttcttcaatgaagtaagattt  
ggaaaattgaaagatgggaaaattgttgcaccatttagtgttaatagattacgggtggttttggatctggctgaattcaaaaaatccaaga  
ataaatgttacggcttaattagtgagtttagtttcttataatgacgatataataaaagtaaaatttggttataatacgaacagaaaaagtaa  
agcataacaatggattcaaaactataaaagtataaagtagaactgtagaaactcacgtatagaaaagagtgagagctatataaacattct  
gattgctagttatccagcaaaagtgctagcgtcaacataaccttgttattactcttggaaagaatatttgcgatttctcagagctgttccagtt  
cgaagctcaaaaagcctggcttattttatagcttccaatcaattggcggtcttcttccacttgccgacgaacgataaatccttgttttc  
catacagcatggtaacgtaaaaggttagctaaaatgagtggttagtctgctgacttctcaaaaatttcaaacggattaacacacgtacct  
tttagcatctgtgagcaattgtttagcctcgacagcggctgaaactcgggggaaaattgaaactagaattgaacggttagaatgtaaaata  
atgaagaaaaggatcatgctgatgtaaaacatggaaacttaccatgtgtcaagaaacgtcgtccaacagaatataaatctagcagcagct  
tcatcaagtttcagcaaccaatcgagatacacgttcacgttgggtaatcagttgactggcattaattgagcaacaacactttcaggacttcat  
gacaatggatggaagaccgctcatcgtaatctccgcttagtgcgataaatthtgggtaaaagcaagaacgtcgggacgagaaagaacagg  
caattgatattgaccatctgaagatctaaaaggagaaggttagtaatgagatthtaaggagattgatgatgaatggtaaaagtttctgtaata  
ggaagaaaataagggaatctttcaacagaagaagcaaccaagattcttatacctttgttccggtaaaagaagagacatttctgggtttgca  
cggacatcataatcaataggagttcaatccaaggaatgaggaaatgggttcttccgggtaaaataaattcttcaacactccgacacgactgta  
ctaatggcacggtgaccaccgtccacgttgaataaagaagttgaaacggcaaatccagccagacctaaagcaactagcaagccagttccgta  
aaagcgtattttcccttaggattccacgctttagatctcatttattgcttaagggtctttgacgattcatcctgaaattccctgtttggcagttg  
atcgacttgctgactgctttcttatacagctccttccggtgtgtacaagttcactatgtgaagctacgggtgggttatttctctatacactgtta  
tgataatgcaaggagcagtaataccaatccatcccaagctgtatgtaaaatgacagtaggtatgggttagatgaatgagaatcaggat  
ggatgggagagatgaaacgaatcttggtaaatcaatcactgagctctatattgttacaattgtgatctgctgttcttcttcaaaaaa  
ctgatttgaccattacaaccgtcaagtcgctgttgaatagcaaatcaaattggctttgcaagaacagcttcttcaaaattactaatctgtagt  
gttggatcatctagccaaggaagcttataaatgaatgaaacgataaatagacaggataaaatggatcactataagattatgtactcctagat  
tgcagaaaaatggaatctattcttcttcttcttccaacatgagtgattttgaccttcttattgtctcccctgcttattgtttattat  
agttgacctataatthtcttagcatgatacacttaggtatctgtgacagtgataataggttacctgtagcattcatatatacaacctgtat  
aagaatacattagcgaatatcagttgctattcataagcctaaagaatgtgtttataaataagtaaacagaaaatgactcttagctgtttcatt  
atthaatcagatccctggacatattacttctctacgtagtacgaaaacgccaatthtaacatacagctcctgtaattgtacttacttccact  
gataaacattcttcaactgtgagatttccagtgacaactgacagtaacctgctatgtatacgtaaatthtcttctgacattataagata

atatcatacaaaagatgttacttggcagtggtgctcgaatttatattgtaacaaatgaatggggggttcggtacaattggccagcagaagtg  
ataaaagaaagttccaattcgtagacatacactcatcaagagattcttcttaggaagcttcttgggtgatttctctggaggatcctgcatgatt  
taccactacaaactcgaagaaaggtgccattttgtaaaactacaaaaagtcaccattgtgcttgacctttgaattcagatactttgctc  
taccaaaaagcgaacgcttttatgactggacgagcacagttctttacgagaatacaaatggaaattcatcaatcccttggaaaaatattgctg  
ttactctaggttattactaaaattattctacatgatagactccaatttctacagtggtcttttctgggaccgcaaaggaacaaaaatattcatta  
aaagacagtagggaacgatagaaagggataggttatgaaaaggtcattgaatattatcagttcaattagaataggtagaatacaaatcaag  
agcagcagaagttttgtgtaggatcagctgagttaccttgttttctcaggttatagttatcagccagaaaagtttagcggttcctatttctatt  
caatctcacgtccatactgacgatcagacaaaagttatgactgaaaaggttagcccatatgacgtagaataaataaccgtggttcttcaattc  
ttggcagtcattttgttcaatcttcttaacgatctttgtcctcctgatcaaaaaggcacggacaatgcggtccttcacagcattcgactcaaat  
gccaccataagcacgctggacagttttctgttgggaaagacgagcaaaactcgcgaggacgtaaagcaggaataccttgaaggaaacacc  
agtatcaccacagcgaggaaatggtccctaatTTTTTtatgcaaatagcgacctgtttccaggagcttgataattctggttttgtgctacgagt  
gtttaggcaaacgacgacgataagtaactcttggccatattctttcttatttaattgtttgtaggtgtttgttatttacttaaatcagaa  
tttacttgaattgaagatgggttaaacacttaaatTTTTTcaacaataaagggtcctataaatctcaaaaatcccaatcagtccttttctactatc  
tcttagaagaaaaactcaggaaaacttgaatgaacactccttaacaaatttctgtcgtaaatattccgtcttttcttctgaattgaggcaaaaga  
cttaataacaaactcctctctcgtgagatgtcattctcaaagtttctgttggactgttcaactctgtcaaatcgatttctgttgggttttctgt  
cgaatttaccagactcgtactgatgtctaaagtggttccaaacaggcttcaactcgtctaaacgagtcctctccatataaaaataaatccaat  
tcaagatttctctgtttgttatgttttttttttaagaataaagaatgaaataaataggaatggaattctacgctgaaagacgcttctgagttc  
tcgaaggatttggcccaatagtgattcacttctgcatcaagtggtgcttagctattaccatcaactacctatcgctacaatcgaagttgctcggga  
aacaactctattttggcctaaaagaagagcttataagtaaacatagattttaggaatctttaaagacggattgatctgttttggctatctttcat  
ctttgtacgagattcgttctcgtgatcggcaactccccttaagattaatctcaagaaggaaatagttgatgcttgtttgtttgatagactcaaag  
tgacggattcattgcttacggattcgtatacctgataactcgaaggctttggactggaatcgagaattttacagttcatcagttgcttgacgata  
agactcagctgttgtttttgctttttgtattcttgattttgttggacttgtgagcgcgagcaagaatgaagtttgggtcaactgttaaagaa  
acgctagtagagagatcaatactcgtatgtaaactatgacaaactaaaaaagaaataaaaagagaaatgaagatgggggttggctgaa  
gaggatgaatctgacttgttgaattactggaaaaagaactggacaaagtgtattcgttcaaaaagcaaaaatccgcagagactctggaaagaa  
tccgattatgtgaggaacaagctccgatgccatcagctcctcaatagcgattctcctcaaacgacactgatttgttactttggaaactgaactt  
acagatattatggaacgggtgatgatttggctaaattctgcgaactaaattataaccgcttttcaaaaatcatcaagaacatgacaagcatacc  
tcttggctttaaaactgtcttctgttagaatgaatgccctcttttcaaaagaacaatatgacttctgctgatcgtaaagcttagtcgactgtat  
gatctcattcgtaccggtggcagccccattaggggtgataatgctgccggaggcacacaacagaatTTTgttcgacaaactacaagatttgggtt  
catccgtccaacgtaaccgagttaaagctttatattcttaaacatttgcctgttttggttttcaacccaacaaagagtttactcgtgaagactctgct  
atttcaagatctatttgcataatgacgatcttgaattttatcttggctccttgaaaaagcacgaaggcgcgaagctattcgccttctgttggatgg  
cagtatggaaaaataaacatttctgttagcgaaaaaactcaccgtgaagattggaccggagaaaaaagttaaaggcaagatttctttaaag  
gaaaaacacgttaacgctttttgctggtgattacaccgtggaagaagctttttaaaaatgcgaaaagaaggtaaaaaaccaatctctgaaat  
tgaaaacttgaacgtcttctagggaggtccagataactgttttagtaaaaggaatgaaaccatacgttcgaagctttatgaacgaacggcatt  
tcaattgccaggtgatcccgcgttctgatttcttggactcaaatTTTggccttgggtccgagaagatggcacaacaccgtgctggaacaattggcgt  
cgtatggacattggaattgactatccttttaactcctgatgaagatagtagcgttcccttatgctattttagaagtaaagcttcagacgca  
gtttgtcaagatccccggaaatgggttaataatttagtaaatagccatcttgttgaagccgtcctaaatttttaaatattatcatgggttttcgag  
cctctttatgatcgcgttgacatgcttcccttctggttccacaaatgtcaatagatattaggaagcctcctcggatgccattcgtcctgtcaagag  
cttgagcgtattcctagttcatcggcatctcaaatgtgtctgacagcgaataatacaatctggtaatgttttagatgaagaagcgcgcatacc  
atctactggatcagaagaaatgaagactttcaagtgctcatgaccgccactttgatgacttagatgaacgcagttaccctactaggtcaggca  
aacgaaaaggacgcgactctttgctgctgactcactacaagctaaggatataaaggaaaatctttttagaactgttccaaagtttgaag  
aatcgaatgaacctcaatattatagcagaaatTTTactgctcccccgtaaaggatatagttctgtctgttgaacccaaaactattt  
tgctctagagcgtacctatttggatttttgcgctactcaattttgatgggttctattggcatcactttgtttaaactctctcacactcgtgcaggtatac  
tagcagcatcctgttttactctcgtccttctgctattattataaccacctttgtattttaggcgagctgttaatttccaagcacaatgctgt  
gcgatacgtatcgcacttgggtcccaccgttgttgcgctgtaactatctttacaatcattccaacattgttttaatttaaagcctaactatgtga  
tctgacgacctttaaattttgcaataatgaaactaattttatagatagatagattacacagacaattgagcataatatttctgacttacaatag  
acaggacaaaaactaataattagtattaagattagaattaaagcaaaaaatgtaggggttaaaggatagaatgccataaatgggtatataatg  
atgaagaacagcgagattaaatccatatcgcctcaaacataatttgaattaaacagtatagtttccatccttctgcttaatcggctggcttttc  
aagtactacatcacgcatactgtccatataattcttcaaaagcgtgcaacaaatcaggccggaagatgcaaaaatcggcatgcaaaaagacca

gcattcactgttggtagcaacggtggcaacggggacacctcgtggcattgaacaatggaataaagagaatcgacaccatccaagagc  
taccttaacaggaacaccgataacaggtaaaggagtagggcagcaaccataaccgggcaaattgggagctcctccggccctgctatgatagc  
acgaaggccagagaggcagcagaacgagcgttaggagaccattcgttcaggggtgcggtgagcagacacgattgttactcataagggacttt  
gagttgatctaagatgactatagcatcctcatttttgataaatcagagtcagagccataataattcctacatcggagattcggaaggaaactg  
aaccttttcttctctatcagtaaattgtacctgcgttcgattcttgagaagagtcagcaataatggttatatgacccatcttctctttctag  
attcacctttccgtacaaatgcaaagttgaccgggtagtagagagcgtttgcatccgagagcgtagttggggtcatcaccacctagc  
aaattcaccataagagcatgagtagtggtgagcgttaaacgagattggcatcggtgaaaggaagaccagtaatcgcgctatgtgtctcaaa  
ctgagaagtaggacaggcttcgatcgtgtagtgaccggaattatgaggacgaggggcaatttcgtttagcaaaaaggcttccatcctttagaac  
aaacatctctacacatagataaccagcacctttgaagggtcgaaccgcatccatggcaagggttgggacgcttctgaagataatgagggagac  
gggaggagcgtaaaccagatggcagatgttctttttgatggttccgttagtagggtaagcgtaaacatttcgtctaaagtccaaccacat  
tacagcaatctcattgagaaaggaacaaattttcgacataataatgggcatctccaaagctttgatgacctcaggaatttctggggtgacg  
aacaacatagtttcttccgtcgtgaagcaagtgtctgttttaaggacaaagggataaccgaactgttccagcagctcgcactgagcttga  
ttaggagcgtcgaaaactcgggtaaagcaacatggaacgattgaagatgctgttttgcgtgatttcttgaatgcatcttaaggtagagtaa  
gaaggctccacagagaccgtagacgagacagaagcagagcatcggtgtttatatgctcaatttcagtcgttactacgggtacatttttgaagt  
tctgaaattgcatctcacgaaaagaagcatgatgatcacggccaccgtaatttgcctcgtgggcaattaggagcgtcaacaatgatg  
caacgaatattcaacgatgagcagcctcaacatcattcggcctaattgaccacctcctaaaattcctactactgaagaagaatccattgtatcc  
cttctcgtgatttctcgcagcaatcctgtatgctgtgaataaatggaaaagtcctgatccatggttctgacggcatgatgaaagggtgat  
acagaactctaagcagtcacgtacagatctatctgttttcttttattgtaataacgggtaattagttctttcagtttctttactgataacg  
aattttttacaaagttgtaataaaaaatcagaaaaccaatggcctgtaagtaaaaaactgatctggcatggttaaagggttctttaaata  
aaaagacagaaaagaaaatccaagtgtctgtatcgttagtttataaacacaaaaggaaacaaataagccaacttttaacttcacgaaa  
aaaacacacctgaaatttaaacaaaatagataaggataaaagatgaagcaagttgtcaaatacaaacgtaaggaagaataggatgccag  
cagacgtagcaaaacgcaatttaaagaaaagcgatacactcggaaagcgaaaaatgaacagcgcgaatgcaagaaaataaaagaaat  
taggagaaaaatactagcatataaatagcgaaaaaaagaaggaattaaagacatttccaagaacaatcagagtagtatatcgaagccattt  
gcaagatttccgttgcactaaattgtaaacatagaagagcaagaaaaacaaaagctagggtccagataaatgagaaataaaacacccaaa  
taattcgaagtttctcattttcactttgtcaatggcctcgaatcctcgaactgaacggacgaacaacccacgagaatactagacggacat  
attggatggaaggcatatcctctgtaataagaatccagttgggtgtccttgaccctgtttcaacatagatggagcacgaattggacgtaaa  
taaacatccttttccaaatagtcagatgagacgaatagtcgatcgtgtattgcggtaaatcactgctgttcaatcaactcccagcaaga  
agacttggctggttgacagcttgaaggttttctgtccttttcttatttaagagaaaaaaacaaacatgttccaacgattactaaa  
agtctgaaatgaaccgcaaaatgttcaagttgtagcaacgaacaagaactgcgtgggacttttaagaaagagagtgactaactcaactca  
taccacgaaaaaatgaaacccataaaagctccaacagacgcgaattgaaaacgcaatggtaatgacttttggctcgttaaggtaactgct  
atcaaccattcaggtttttggtagaactcgtatatacctaccgctgttttaaatcgtcgttataaattttacctctacattcaggtagcatgctc  
ttccaagtaacgtgtcattaccatgaagattcgatttttaggcatgtaaagacactatcaataaaagttataaacttttaatgccttttaggc  
gcttttaattggtgttcaaacacccaaaatataatcgcaaggcttagtttcagcaatagtcggcgactacacagatgctgtacaagactttcat  
tataaagttcactcgcctgtggatgggtcccctaatttattatgagtttattacttgacgtataaacaacatacatcctgaaaaggctcgaaaaa  
atagataaatcaatggcgagcatgattccttttagcttttaaccattttgaaaagatcatccaatgatgggatttctctgtttgttatgggtggtt  
gtttacattctcaaatgtaacaaacgtacatcctgaaaagataaattgaggtatagtttcttcttttgacagggaaaacacatcgtttcaa  
atagcgtcttttctaaactcatgagcttactccttatgaaggaattgctaaacaggatttcaattcagtttatagtaacaaaagcttaagaaatga  
gtgtcctcgggttatcaattgctttacatcactggaaaaaataaaatagagggtgctcccagttattctgacacccttttctcttcaaatccat  
caaaagttgggctacctattaatgatcatgtttcatttccaataatccctattcctttgcatcctagaaaaatattttgtttgtttgagtttt  
tgacatcttttgagtacggtagttgattcccttcttctaaatattttgttttagttctccccttcgagatttctgtttcatttctcatttctccg  
ttgctttaaatttctttaaactcaagcttctctacaaatgctgctttctgatattgtttgatccaaaattcaactgcaacatgcaagatattgat  
ctcacctgctattttattacgtacgtgtgaaaaacagtgtagcaacgagcgttaaggaatagaattgagagcagaaatcgatcccctattg  
ttcctagccaagcgttagttacatcgcaagatgcaattacagcatacagagaccggtccatctactctgttatccacgtgcgtgttgaata  
gaaaccgttagcaatgagcatgagataaaagggttagagaccagactcgaaggatgcttgcattccttaatacaatcaattctcctaataagtaag  
ttgaatctgcaacctcaacaagctttggctcggccaagccaagctttgggtttatgttcaataacgaattgagtaggattaataacaaagga  
ttaagagctgcagcatctgggtatgaaagacaattcgttcttaataaaaaacaggtgatccttttcaacaatccagcattgagtttcttcaata  
aggagacgtcacaataattccaaaagatcctaggacaaatcgagtagcttttgcgtagtcgcttttctggtgtgtctgtttgtttattcga  
ggaactctaacgttgcgtttctgacaaaagcaactgtttattgttaaaaaataatattttgattaatatttcttctaatagttagtaaaat



tgcgattttaacttgagtgtatgcatttgcttgacaactatccggcgtaaactaagaacaatgggttagcgttgacttagtctgttatttttggt  
aaaagcaacttttttcttaataagcgaaccgaaattagattgaacatcctgactgctgttgaaagttaaaaaataagtaacaaaaggtac  
ataaacacaaaactggttattggcataaagtcgcttcgggagtagtagaagctctcaagttaaaacatgaaaagttatggtcaagcttggcat  
cattaaaacttgtaggcttatgcgaaagtaactcgtgaaacataacaaaagcttcccatcaatagttggaagacaatctagacctaacatcac  
agataattcaatcaaggcgaattgtattataggaagccactaagataattaccacgatagtagcttgataaatcccttggttaccgattgcat  
gcataaacagccttttctcgtcgtttcaatacaagtttcaaatggattggatagatccaaaaaaaattctcagtcataaaaacaagatag  
ggaattgatcatctctgaattgcaaagattaaggcaatcatcattgtgagacaaccatttcgtttcgttttaggaagattctgtgaggtttgc  
tttcttggaagttcgaatgggtcttttattcaacgttgaaaacgactgtctctgacttattcttctcttggttaagtgaaggaaacgtctt  
gcgtaaaccggaagcacaagtcaggaagaacaaaattcatacagcgagtgagaaaaactatactatacgaagatacgcgattttgcataaat  
ttcaagattcatgtccatataaggaatgcagcaatccttgactgattgatgaactgcataaatcattcagctaggaaaacttgagatgtctcgttg  
aacgtattgtattccttttaacagtaaaaaatcgttctcgaatgctcctgttcagttgaatgtaatttttaaggaagggcctttacgagtcgtt  
catacatacattgtctctaatttaacaattttaaaactcttgccaaaggaaagaccagaggatccgtactttctctcgtatgtttgtgattgag  
gtactttggaagtttcgcttcaccggtgtgcaatcatctgttttaagatgaaatgcataatccattttcataaaagtagattgaacctgtttt  
tttttttttggttcgggacatcagcaaaaagcttcatcatcttagctgtattaactgtactgagataacctttagtacgattattgaaaatgttcg  
aataaaatagttccgaaaagaaaactgtgagagttatttttaataatcatcaattcattccgacgatcttttcacgtttctactatggtattc  
caaattgccttttgacggtaataaaaaatctacgtcaccttactgtagtagctactacagtacacaaattgcaactcaacttcaataccaaaa  
ttgaaatagcagagtggtggaacaaatagagtgaaacgaaggaagttaaagtacattcagcttcaaatgggctgcctttaccaagaattgg  
attcgggtgtttcagttaaagatgcggattgttatgatctgtgacagcagcactggatgcggatttcgacatatgatactctgaggttttgg  
aaacgaagatgtatgcggaaaagcagtaattgattggtgacccgaaatcgagttcccagaaccgatatttttaagtacaaaattggccaact  
gtccgattacacggcgacgcgctcaattcgtagcagctccaccatttgggcacttacattgatatttttcaatcttttcgacgagcagggc  
agtaaggctcgaatcgaaaagctgggagtcaggaagaaattatagagagaggagatccgatgctgggcggttgaattatggtatcaagca  
tttagaagaactatgcttcaaccaaagcatcttctgtaattaaccagattgaactacatccttctgtagagacgatatcgtcaactggt  
gcaaagaacacaatattgttggaagcctattcacctctcacacatggcattcgtctcaagatccaaagctcgtggagattgccaactccatcg  
gcattgatgtcccagactactgctcgtagggagttcaaaaaggttacttccatctcgtccagtgaccaatcctgatcaaattagggataattg  
gacattttctcctaagaattccaaaagacatagaagataaaattacctcgtcgcagcaacattggcacgagattcctcttatgacctactattt  
gtgaataatttcttgattgaacgacttttctcgtcttgatctcggtttactctccaataattgactatcatcgagctctgatgaattttttttt  
ttttaattaatgactttaaaatgatcgtatcaattgaacatatatatattcatgggtacattttaggtagtagttagtccattttatactttcaact  
caaatcatctttcattatcctaataattcaaacacatgtagttcattgcaataacatagtgatatacagatcgcaaagaaaacttctg  
ttttttgttctctttccctccactctcaatatacggatattttccataaataaaatcatgacttagttggttcagcattttcgttttctcag  
atcagcgttttgtaagacaaaataattatattgtccattagcaaatggtgactgctttaaagtacttctaaggaatagtaaccacatctc  
attagaaggatcagcaaagtcgagataaccatattttcgaacattaaaacaccagtcaccaagacttctgttactcattaccaacagtaatg  
acaacaaaactttacaaaaaataaacaattcatcaactttcgttactttatccaaggctcctcatccacataattgctcgttgatgaagat  
gcaccagcattcggctagtagctttcattatgcagcttctcctcagtagccgttagctcatgagctccacgttggaaccgtttcatggttgact  
gcttctcactctctgagcattactgagcctcgttactgttatctttatctctgatggaaggatcaataggagcacggcagatagcacaggtt  
ccattcacacgcaaccagggcttcacgcaattttcatgaaaaagtggttacacggaagctgaataacctgatcagtttcttaaaattctccata  
cagatggtacattcattttctccttagtaaatcaaccggagggttacttctgagttcagatgatttctctgagcaggggggtgctt  
atgacctgggctgctcattagctgtgatataatcatctagccctctgctcccaagcatagctcctggttccagccaaataaaaacgt  
ttgcaaaaatgtagctgggtgaaatggggtttcaccttcacttctgaccttattttggttaaagagccaaaattctttccaaaatagagcca  
aggtcagcagataggtatagcacctgcttgagctcttgagcagcttaccagaagtattcattgatgtaaagttccattaggtccatggagaag  
acaaaacttgagcagtaaatggcaatcctgagtcagatcaagaaaattgggtgacctcatcagtagactgagactgttcgtaattgaaggt  
gttgatcagaaccagaagttgattccggggttgggtgatcgaagaagcataagaggaagcgtctcctgagtgagattttacataggt  
ccagtaagatgttcagcagggctggttctgcagactcggcaccgtgaggagctgtctcatgggtattagcgggtggaaggtgattggaggtagg  
agatctagacagcgattcaaacaccgggctagtagagctgaaataagttatgaaactgcccactcgtttacaattccaggtgtaacaaatg  
gggtccggtagcattaggggcccgtttcaggggaaggtgaattcgtctgcacacctgatcgcaaatcttcggagtgaaactcagaggac  
ggattatcgtctcatttccggaagctgtattggttgggattcagatgcctcgcattggtgcaaaaggcacgaaatattctgcaacatggcac  
cgggatcagcaattctggtataggaatcatattttgactctaggatcatctgtggagctgtacttggctcgtatcaaatataagagtcgtaagt  
cttcaagttcagcttcttaaaatggggtacgaaaaggtttccaaaacggaaaaaatatcactcaataactgtttatttcttttaacaagtaac  
cctgaacatacatttcgacaaagtcactattgcatctggtacaatttcaggttggtaattcatttccgcaagcatgacagttacaaactactg

gtagcactccatttctgatgagggtgctcaagcaaaagcgatctgaaacacttctcttcaaaaatagaaccagcactcaatgggtgggtgtgg  
tgttttttagttagttagcaaaagatgaagttcatgaacaaatgattaaaggggtcaatttgggtgttccagatattgctgtgaaattggggagtct  
tttttctgtacttcaaagactttcattttattttaattcttctgacttgaatgtggattgatggtatgcatcgataacctactgaatgggttaaatt  
ggaactacgggtggagatttacttatcgaacaattagtaatatatggcttttatcgtaaaattcttactaggtaaaagaggtaaagaatgaacc  
agacatcggggcgtattgtgctttatccatcaacaatctggtaactaaataagaatgccacctttatgggtgtttcattttgataaaagacgttcaa  
aaccctaaatccagctgaaagctggaagttcggatgaggtagctgaatgccgatcttgcgaaactagagacattcagactagttatagaag  
aagtcataatggagacgttaaaagttccttaagtgaatccttaagcctttgatttctcgttgacgttgcctgtgtaatgagtggttaacgggtcgtttgt  
aactaacgggtgaatccaagaggctaggaggagaccaaagctgttgcgtgacaagcagctatacaagagcttgacagcaatcacttctctatctc  
tcaattccttaactcgcatggagtttgattgtttcagcgtcgttgggtactcacgcaaaagtccatgggtgacgtatcgagcatcatcgatctt  
ttgaaaaactgtatccaagggctattgaatacatggattctcgatacaaagtaaggtcactccatacaacgtcggagcatggctatgccttctt  
cgagctctgagagcagcctagaattaggtaccaacatattcaaaagttgaccaacacttggatttggctgctcagactcaaaccggtttc  
ggatgttggcgttaactgtctgcgtgcaggaactcattgaccggaattggatgctgttactgaccgagagggcactaaaaaattggataa  
aaagcccaaaagagattcgtctgaggtgcttagtgtttgctctcggaaagaaagctttggctgacattttgacatttgcagaacgtttgtaa  
aacattgctttctatagataaaacaaacagagcaaacacttcagaaaaatcgagatagctgctcaataaactgtaataagtaagataa  
tgaattgattgaaaattcgttaattgtttcaacacctttctaaattctagaaagctctcgtattcttccataaagtctctcagtaaaccatcatggat  
actcatataggttagtataatcgaagtttccactcacgtcgttctcaatttctacttatgctgcatattctagtttctttgtttacaggata  
gagatactttaggatgtcttaatatatggcgaatcccaccgtatcgtaatttgattagcgaatgtgactacgctcggtaattggtatagacagtc  
acagagtcgaaactttgcaaatgagatgcgaaatgaaactgacacaccgcaaaatggcttctgtaacaagtgaagagcagcccttactttc  
acgcttcaaacgaagtaccgctgctggaagtaagactgattatgctcgtgaagcgtatgatctcgaagcaagaacaagtacaatg  
ctccaagtaccgttgggtgcttctccaacgttctgacactgcaagttatctctctagagtaacgggtactatgttctgctgctgctca  
ctctctgagcttctcgtacggcatcaagtggttgggttaactggtctgctgcttattgctaccggtctttggctgctgctgctctcatcaag  
attggtctgctgacaagtatgagggatcactgagcccgaaggtcaattgagctcaccgaagctatggaagacggccccgtccctcaaggtt  
ttcttggatgctgggttgaagcgtacctctaccggtcccgtgctcgggtgctatgaaggggtctccgatggcggtttatagcttctcactctccta  
accgtttcccgggttcgacgttgagactaaggaattggatgacgagactgctccgaagtatatctacgggtgctcaggttctgaatacatggaaa  
tgcttattgatgatgaagagcgtttcaaaaagcaattctctggcttattgctgacggtattgagagcgaccaactgaggacatctatgctga  
ggcttctgccaagatccgtgaggtccctctgccccaaaagagcagcaaggacgttctgctatgaagccgaatctctcaagtacaagcaaga  
aagcttctgggtgagcgaaggagcgttcaatgcaaggttctgctgctggtcgtgtttaaagcattgctactaataaaaaataatttctc  
gttctgtgctatcatgaatgtttagatgtagaaatgacaatttcaagccctatataggaaacgaatttactgaacatgtaataggggtttatga  
taccgaagtatagaaaaatcttattttatgaagattatttctctattgaaaatttttaaagatagagaaacaaaaccagaactcgtttgcaatga  
atgaataaggaaactttagtagcaaaatattaagaataaggaaaacattgaaggggtcaaaatgctttccgctggtatagtagaacaataa  
gctaaaatgcttaaatgaagctcagaggagcagatccaagacactaccaatcctacatacattcctcaaaaatatacaaaaagttaaaataa  
ggacagtggagacgtacgacactcatcattaaaagtggtcctaaaggttcatcgtaccgctgaatatcacgaattgcaagtcgatcaagcaa  
aatagatttaagaatatttccggcaggcgttatcgtttatctacatgtgatggtactttgaaaatgctgattttcaactaaagcgttacgataaa  
ggaaaaacggcaaaaacgactaatttaaaaggaataggaattaagcgacaaaatttttacctcttttaaaatttactcttggcgttcgctatcg  
gctgacaggttccgagggtgagcaggttcgacagctttagtagattcagcattgtttgagcaggttcagcattgtttgagcaggttcagcattggt  
ttgaacaggctcagcagtggttgaacaggctcagcagggagaaacttctgctgacgctgacttttctgattgttgaggtggttgttgttctgctgtt  
caggatgctgatcagaggatttctgctcaacgggctgctggtcgggtggaaggagcagcgtagccctgggctcctcgaaggaacatctgggca  
gggatagaagcttcatggagggttagggttagggtagtactaggggactagcttctggagacgagcactacgacgatactcaactcatc  
aggcggggggtacggcgaggagagggtgaacgatagtaaggagactctcgccacgttcataactaggagagcgtatcgcgcgaccaggggc  
ttctactacgagaagggtaacggggactcatagaacgtctgtaggagaaagagagcggtcaccaccgggggaaggagaacgagtagggaga  
cggccacgctcaccacgctcaggaccacgacacggcccgccacttctcggccagggttacgacggagaggcctgctggtggaggaggtt  
gcttagccattcgacgcaaaagtaccaccaccgctcaaggcgacggccatggacttcatagtaagcatctcagcatcccgggagcttca  
tattccacgaatgcaaaaactatcgttcataggttagtgagcctcagatgaggaagtagcgtaggaacaatcaatgaagtgatgaagcgggtcc  
gattactacgttcaatcttacgtacggtctagaagagcaggttcgaggaataggaatatcgcaacgaactagggggcctaaatctgtaaggttag  
tatgtaatttttttagatttccgcaagacatacggctcaaaactcaaaagcaagttcacgtgacggagttcatctcgaaaaaccggttaacataaag  
cgtacgagggttctacgactcatttttattgaatctcagtaggtaccgaatggtggttgaaaaaagaagaacaccaagtaatagtg  
aacagcaagccgctactaactcatttaccgaggcttgaatatcggttaattttctagcgtattggatggttaataaacgaaaatgttctatag  
aatcaattgacttggggattataagagataaattgaactgtatgctatgatgtttaggtattctccttctgctgttacagggtggcagaaaacg

caagaatagcaaaatacagaagggtgtcgacctcgccgacgatgcatcaaaactcaaaaattgcattcactgaaactcctacaactatctatct  
acatgcttgagagaaagtagtatataatcagcgtagacacagcagcaggaattttatctacgaatgtcgagtgggaattagacacacaagatg  
atgtaaaaaccaggcaagcaacccaaagaagaacaagtaggaaagtacacaagggaaggataaaaagtcgaagaaagcattttatac  
cttgaaggcagagactttctgacccagcagctcttcgaacttgcgtccctcagaacggacatggggagctttgtcttggggaccgaaac  
aaagtgcaggaaggcctcacgagcgtcttctaccacggagaaggacgggttactgccagtggggcacggaggcgagttggtcaagagt  
catgacttcaccgccagcctcaagatacagcagcgggagacttgggaagcgaagagcagcaacagagagctggggacagtcaacaaac  
gctcgtcatctgtaacggtaccaacagttacgacggcttaccctcaagggttgaagccttgcgactggtcaaaagcagcaatctggagatagag  
ataggaggacggtagcttggattggaagaagccttaagatagcttggtaagcagagctcagtagcagggccaagaagcggtaacaact  
tgacaaaagctcaagtagacgttctcagaggcaggcttgcgtggtgagactttctgacgtggtgtctcaatgtcaatacctaataatggt  
aaaaatcacattccggctacgattttctctttacataccattgtgacagaaacgctgctggtttgtttcaagggttgcacaaaatggtgatttt  
tccgtgactgcttctctcttttaggtagggctttttaccgccttcggtatgtctgactttgaaagggtattatagaagagacaagcgaaga  
gacacggattcgtattccaatttctagttaatttttttagctgttctctgattcctttctgcaacaaaacaaaacaaacgaattgtttcatat  
gtcccagttcgaattcgttaataaacatattcagaagacactttttgtattattctaaggactatgcaacaaaatgatagtgggcagaaaatga  
aaagcaaaaaattggttttagggttaattcattgaaatattttcaaaaaattataaacattattataaaaggcaagaacgatttatttctattt  
cttccacaggaacgtatataccatacctaacgataaataagtctagaacatgatataatattaagttatgatttcaacaatattaacagctggc  
ttcgtggtgtagtgtagcactctgtttgggtcgaagtggtcaggggttcgagccccctgaagcccactttttgggcagcaactttttattcta  
aagtgctgacgctacgaagccttgaaccaatgttggctacctatgccaatgaaagcatacagatatcgctatctttcattgaaactcattga  
agtcactttttcgtcgttaatcatttccagaaaatgatgtaggcggaaacaggatcgtgacatcattagttttatccatgatgaaattggtcaattg  
gcaggattcaatcctcaagaacatattctttggaatacaacaagttcaagaattcagtgagttggaactatcaccgacttaacttttaggt  
tgctattttattattcgtgaacgcttctgtgattctatttagactgatttgactactttactgaatacctttgttaataattttcattacttttaccatt  
tgaactgttattgatcatggcggactctacaaatgccctagtcacccttctatgcggatattgtaaaggcaatgcacttctcagaccgagga  
agaaaaggccgctcctctcctcaggttagcctgttttagcgaagagccacgtcaaacagaagaaaaagtggtgtcttgacgagaatg  
aggcagattcttatttgatccgggtgtctggtgaaagtttaggaaaggaagcgaagctgctgataagaaggaacaggaaaacaaaaga  
aagatatagagaaggaagcgaaggtatagcgaataaatgtccgaagtttccgtaacagcagtaaggtttctgcttccggtatttccctcg  
accttgcgggatcgggtgctcttctgctacttgcctcaaccgctcaaacagaacgtaaccaatcgttctgtgacttgcaccgcttagctg  
gaattttattggctggcactgcccattgtgataaaaaagcaagattttcaaaagaaaaaccattgaacgcatgataaaattcgtgtagaag  
aatttcatcgtggatccatccctcaaatcaattcgtctcataatgaatactgtgttatttacgaatgccaatgattcctagtttctactccgttcta  
tatgttatttttagcttagaactgttctgtcatttctttccagtgatttatccaataattagttggtaataatagaggtttgacctttgctttt  
cgtaatatagaatctgtattgctgaagttaatgttgaaaaaactttgtacccttggccttaaaaaagcataatgggaaacaaagtcacaatccct  
accctatctcctaattttgtttgggttgaatctacctaattgtgactatagactgatacttgcgtatatcaatattctttactccagaacaatag  
atgacttgataacctttaaaaaaattgacattgaaactaaataaaacgtaaataaacaaaaccacaatcgcgcttaacacggctgcgcatgtg  
tagaaagaaaaatttataaaacacttgatcgaaaaagatcgacgtgcaactataaagagagtgataattcaattaacgaatgcagaata  
aaagaaagaaaaataatatttgaatagatcgaagatgctatgaataacatataagtggtggcgaatgaagcgaaccaaactagtagtact  
agagaagacaattgttgaacaaatcatagcaaatgagttgcaaggctacaacattctccctcagaaaatttttttagtagaaagagaagatc  
aatagacagattcaatagggcagctaagaagggtgttcaattctatacctagatatacaagaggggaagcaaaaaaagaaatttctt  
tactgtatacagcagcaaaaagttcattcacacatttaaggatggagcaaacacggcgaggttcatcgaaacgcatacagcgttctctaagtt  
cataatttctcatgacagcagatcttctccttagccatagtaggagtgagcagtgaccaccggagaagaagccgtagaagcccagtttag  
cataaagggtgtaagtataagaagcaccaggttagcggtagacgtggggtaagggttaccacatattgctgtaaagacactgtaggaagagg  
atggcacaagagggtcaggactcatgtccttagcggtaaggtagaacccggtctcggctcataggacatgtgcaaggggacctgattgttc  
agataccaatttctatagttctgttggccacaataaaacaaaactgttaggagccggggattggaccaaacacccaaagccgagggctgtt  
aaaaacgttaccgtcaaaaggtaccggtgagtcagtgacagtaaaagaatcggaatagtcattgacagcttttccattagtagtagactttg  
cccaacaaaccatacttaccgctgcccccaactcactggcatagaaaatggacataggaactagttgaagaaggcttaacagtatctgg  
aatttctgtagcaatacttaggatctgagccagattctgtacagatctggaaaactgtctgttgaatatcatctaaagaaactccagagttcagctt  
tccatttgattgtgatggcatcgtatgaaaaaatctgaagtcattggctgagtaatttttaatttgcgcaaacgcattgacgattgaacacc  
aatagcagattatgaaccaccacatctttcactttgatttcttctcctcgggtaggcttggtaaaaggaaaacaattgggaatgaatagaaga  
ggaaccattcggttaccatgacgacaaaatgtagcgtccaaaaatgagctacgtagtaataaataatgcaataaaaaacaagaatggatg  
aatgagggaaaatgaaaacagatttggaaatagaaggaaatagcaacaatgttttttgaaaaaggtaaataatttgcgagaaattgggtttag  
ttttagttgttttccagctgcataaaactggaaaaactaaaacacagactttctatcatatagagaacaacaatgaatagctgaaacttctctg

taaactattgcaacgaattgctatggattcttggctgtttttgtagtaacaaaccgatgcctgtgtttaataaagtgagagagaacttttatt  
ggatataatccccaaagcgatgccggaactttcgataaacgcttactacgaaattgcatccttctctctctctccctccaccttttcttttt  
atagcacccttggagcttgtatcactcactttccaacacatacggttcatagaattatgtcttctaataaaaatcattgaacattggatttcta  
tcgctgtaaatagaaaaagaattgtcttggaaaccgcaatacactgtatgcaaaaagtctaccttttctcatcatttgaaaaagcctgaccgct  
ctatacactctcttcttggctgtttttatataatccttatttttctgacagatggaattggaggaagaacaactgggtccttataccaacg  
aaaaagaattcctaacaggatttggtagcatcgaatctttctgaaagcctgacaccgctgacgatccctctgaaaacaatatctatgtga  
tgatgtgctaaattatgtatgaatctccaactcatttttgattctcttctgactatttttttttttacagatacagagctgtcaattcagcctacct  
gttgataagatccttctcagatgtccccatattaagcaggtttctgacattgtaaggacgttctgaacagcttctcagttccttggcttatacaa  
ttttgccaattcgaggccacaaaattatcgtgtcttggccacagaagtagcatttagaaacatttatacgtttctacacaatgcacagg  
atgtcatggcaaacgacatattgtaattcttcttggctttctcaattgcttaatatcccggttccctttctccgttgagcaaaagcaagaatctca  
acttctgatttggagcttgcactcttctttagacaagagtgactggaaagagaagctgcttcttagcttagcacgattactcttagacaag  
attgcatgcatgtattacaaatattctgcaatcctcaattgattcatgggactcaaaaaatcttttatagactggatttcttcatcttggcagt  
aattctaaagtagtcaaagagaagacttttgaattatagcagttacgttatatcttttctaagattgtacgggctgcaactcctcatataaaa  
gtagctgctacacaaactgctcctcaaatgctatgcaaggttggattgcttttgattccaatgagcgcacctctaattggaatacaatcccttg  
atctgactcttttactctttacccaagataaccgaaatgcatgttcatagctatttggaggagataatcgatttttacttttatcaattgaatata  
acgatactttgtacgatggctgtgcaaaagggctagccagaattgtgaacgcctcccctggtagcttggctgaacaaataattgatgctgctgt  
ccttttaactcttgacaacacttttttaaatccaattataatactgttaacatttctattactgccccgaccttggcatggttctatgttattcttgc  
tagattggcaaacatgagacttttaaatataaaaacaattctgcatatcctaccactcgttgaattggtaagttgacccaaagcagtagctcctt  
aaaaatacactcattctacagggattatcttgaatacgcgttggaaacagagtttctggtcaaagcattcgtgacgcttcatgctatttct  
ataggtcattatacagatcttattctgtaagatattgaacctgtccaactaaatcttatactcagttactccaaactctattattgacagagaa  
gtaaatatccgagggcagcagacagcgcttattcgaatggtcggaaaggcatggttcagtagctgatggctgaaccttatttattcctaaatt  
attcatctgttccgatcttctaaattgttatggcgactatgcctaaaggtagctaaaaaccacatttctgacttgcattctacaaaaattgttgc  
aaatctgcatcactcagctacaagattcagaatttagcaaatgcatccttataaagttgtttcaatataccatgaggaagctaccgtatatttct  
ctttctgaaagaccgactgtcaaccggcaatgctgatcatgcaatggaatcttctgcccattggaagcattgtgagatgctattagattatgat  
tcttcatcatcattactgaagtcagttcttattgaatttggcacttatactcgacttaaaatcttctgcttcaaaaaaccaaagcattttctg  
gaatctgtagaatgatagactcaatttcttctcgatagactttgataaaaaatcttctgattctgctttgtatgccttaaaaacgcaatttccct  
tcgtgaagagtcaattactgaggatatacaaatgcatcactcttgggtcggcagaccatccggtagctacttaattgaggttatgtcttgt  
ataattttattcctcactgaagagtttcaacaagcgtttctataattggaaaactacctgacgttgatttatctaccaagaagatattatcctgt  
acttgaacacagcttactgctcaaggttaagtaacatgcaatctttaaacaactaactatcgatagaacatactatagagctccagctctcgatt  
atctcagctttcaaggcttatgtcaagcgtatatagaaaagcaaccagcgtcaaaactgaatgagctgtagaattccttgtgtctatttctataat  
tatagaattgataccagaggagatgttggctcatgggtccgaaagcaatctacaggtttcagaaagatggtaacttggactcaagagctca  
gaaactcagaaagttgcttatctcagttcttcttattggctcgtcaagcattcgaaaaaattgataatcttgccttattggccttactgctta  
gaagattcaaaggaacatcaattttaaacatgacgaaggcttaagaaacattattgactcctctcaatacagagactaaattagtcgaaga  
agacaaaaatgaaagtcagctatccggtttctcaactatacagctttctggaagatgcttcaaaaggtatagtgacttccacaggaacggctt  
ggaggtggaaggtatagtaacagagtaaatgggtcattatgctaaattttagattacttctattataaaaattaccagcgttatgtgatcaa  
ttgaaggatttcaaaaatgaaagttgtcagactgtggattatccaagcaagatattttgaaactatatacaaatcttcttccaaaacagagg  
atagccgtctttattacaaatcgctcgtctttacgtccttgcattgtgtggtgatttgaaggttatttctcaaaatcgatgtacttatctca  
catcatctattaacagatttctagttgtccgtgtagcttctggtcgaacacgggctttaaagtacttccacaacgggaattataattattct  
taattgttaaggactttctggtatctaagtagatgttttagctttatactttaaagtatgtatccaatttacttgacattctcgagagaacata  
agactacaggtcagatatacttttcttcttcaagctaaagattactcttttctccgaacatataatagaggaatttcttactgtggattgg  
ttgacactcatatgcaaacattaaattgttaagaatttagacagctcattcaatcgaaaatagagcagcatgaacaatcattaaaaagcata  
aatgtcttattcaatagtttaataacttaattaatggaacaccttatttattcaattattaagcatcactaaatccggcattatagtagtatacac  
gtagctaaatgaagtaagctgaggaagcacaatctagcttctgttaacaccaaaaatgggtgcatgttatgcacaataaaaatattagaaga  
aaagaaaatnaacaaaaaacaccattacactttagccgaatgaacaaattataaatatcaggaccgtaacaaaaatgtaataatgaaga  
caaggactactcaagtttcccgaagttctcaaatcttctcatatagccatttcaagacccttaggctatcttggatgtacagcttaactgtat  
aatttactgagcatataagcaacttctctgtaaacattattttgtactcattgatgaatgagccagttgatctgcctctatagtaatagctgtat  
ccgctgatcaattgtagcatgctgttatgcatgaaagtttaagctgttgaatcatgctctaatttctgagattctgtattcagagaagcctttc  
ttggttctgactcgcgaacatagtagcactcctttaccacggaattcaaacgggactcaatggattcaattcatcttgaattccgcaaccggt

catttaaggcatcaagtacttcttgatttttagagactatthtctctcatgaaattctaaagtattgagtacgacttgattcaaaaaaggc  
gtaaatagttcttaaatcaaggttatggatcctgttctggatctaagattactcaaaatgccattccagcacgagcaggtggaggaa  
atcccaatccggaagctagggtgctatattttgagattcctttcaagggtatcaatttcgattgtactaagagatcttgcgaaaac  
tcttttagctcggttatcttattgccaatgaaatgatgtttcgatcactgttctgttcagacatcatttttgaaatcggcgtg  
ataaatcgactgcat  
atccactcttgatttagggatttctttctcattaagctcttgcaactgggcttctttcagtaagactcagctgaatttgctt  
ttaaagcagctct  
cgactccattcttgattgaattgaggacataaatgattgaagtttactcatcccttgattgttttaaatcttcttctagtag  
tctgatttagagt  
ctagatcacctgctgcttctttgctttaaagctcatcatttctgtttagcagctgaatttctgattaatttcttattttg  
tctcctcaaatgacg  
cctttaaactcctgttctggttcttctccatagaagcctgtaaaaaatagatgatatttgcgaacgaggtaatacaatgac  
tctgttgacaaagtga  
tcatttaacgatcgtttctacggaaataagccatatcgacagcctgctccgtacactggattaacaatacaagccagtgcaac  
attcctaaaatg  
gcaggccagctatgaggagtctctatagccactaacctggatcgagataatcgaatctgtaaaaggatacctcaaggactt  
taaacaattataac  
atcttctcatagcgagctccgaaccgaaatgggtccagcttattatacaaaaactgaatatggaagcaaattcctttgtag  
tgggtagaaat  
ctattatcggggtcaatggctgtggataccacattctaataaaaaatgactacataagctgcacactctgtgatagcgtt  
atctgtcaacgg  
acgagggctctcatgctgaagtagatgacgctggccataaaaagatgactagacatcctcgattcattataactggac  
ctgctaccc  
tagttagtatgttcatcgctgctctgctacaagcccaattccttaccggtgccaagctgggtctcatagaaggtgtgca  
agccggaagaa  
gacattgtcatgccatccactgcatagaaggacggttgaacaagtgtacgctgaggtgctagactgttcgcccgtcact  
aatccattatcg  
gcgaatgtgaatttgaatacctgaagatgaaggaactgagaatatcctgaattatatttagtcataaaaactg  
tttagtttacttctc  
acgtaagacgaagaatcctgcatttgaacaaacaaaagtaattgttcttctgcttctagataagcatatactgagt  
ctctaggtcgtaca  
caagagttctgtaaatgctggtaaaaacataatggtatttaccaggttcgaataaaggattagaagtaaaaataca  
atttattatgtagt  
tcttattttctgtaatgctgacactttgaagtatttagagttgcaaccaactagattcaaaacgataaataaactaa  
atatacaaaaaata  
caaaaagatggaaagcatgcaaaaaaagaacgcacaaggctgaaaaacatttactgaggattaacaatgacggaca  
aaaatta  
gaagggaaatggcctctattatgatcatgctaccaacgacgaagcctcccaccgcatctcataaagtctgattacag  
caatggtatcgctt  
tctggaaagaatcttccaggaatagcagcattgtagctgacagagcatgaacgtatccaaggatttgtccgctcaga  
actggtggggttct  
tagatctaaagaaggatgcttctcagtatcgtattcaccaggtataggtctgtgacaagtttgcgacgctgatacc  
atttgaagcaagaa  
agtcacgtaatagaggattcgagttctgattgataatcgtcatcattcaaggatcctcccaggctccaacaggat  
ctgctttgactcc  
atataccggttcgatagcaccaggtgtcagagatcgtgtaaacctagacgcacgacgcatgtagaagacgaagg  
ccttgaagactgg  
gtttttcgcactgagagaagtattgttttaccggttatcagaaatgggtgatacggctctatttccatttccata  
acactactaaat  
tcatcctgaaatcgtgtgctg  
ggaaatgggaaacgcttgataaggtgggggtagctgttctgattcagatcaggcttattgcttgcagatggata  
aatttctgaaa  
atccatagggagtcatatccgaagaaggattcaaaacattaggggtaacaggacgactcgaacttctaaat  
tactaaaaatt  
tttacgtggagac  
attcgcctgattgcgacgagttggaagacaatgacgacgctgctgattgactcggcgagagcgttttgtaac  
cagaggatcct  
cctcaaaagt  
agcattcctgttcgagcagctgcggaaagagtgaaggctgatttagggtcatgtatcgtttcgacgttggc  
ggagcgcgct  
tcgaaaatgtct  
tggactagctccacaactctcaggagattcaccttgaaaaagtataaaaatagggagctggggaataccag  
ttcccgtagct  
cgagaatcg  
ataaagccaaaactgcttctgacgttgacgctcttaaagatttgaattcgtcgcgaagctcatcatcattaa  
aagcctc  
gagaacga  
gaagagtaaacgccaaggacgcttctaaaaatgacgacgttcttctcgatgctttagcttatcgaagcaat  
cttccactc  
tattacca  
acggtttaggtatctgagacggttggacgctagcttgtattcggaaagcgtttagcaattgaattttagtct  
tctgttcagtt  
ataatattcct  
tctagttcttccaactagcatattctgctgggaaacgtaaatagtaaaccttttgcataaggtaatggtat  
tctgtcctg  
atgaggatac  
attagcaaaa  
caagtctattttaggaacaaatcttccatacctttcgaactttgcttcttgaatcttccctatggcatt  
tttcaatg  
tctgctata  
aactaaagctgcgttaataagagacatttgagagaaaaaaaatcctacagtttctttatcttcaagata  
ctgcatagc  
gactaaaag  
cgctggaaacatcatcttgaaaaactgagcagattgcgagatggttttgcctattgataccacctcgg  
tctcactc  
tgaatggat  
gttttaa  
gttccggttctattggcaccacattcgagcagccaatttgcccatccgctttagcataatccttcaat  
gcttctat  
tagataact  
gttagaat  
gggaaaagtaaaagcaaacctgacgtggcactcccatattaggcttctgctccccttttctgaaaaa  
gaaataga  
aactatg  
gaaatgct  
ttcatgctgagaatagaataccttctgtaaaaaagatcgtaggtcttcattgatgttttagttt  
cactgaat  
ctagaaag  
taatgcat  
ggtat  
ccttcat  
cattcact  
cctaagat  
gaaaacg  
aggttag  
aaaagta  
aattta  
agcaga  
aacagc  
agtggg  
atgcc  
aggaa  
attgct  
cctacca  
aaagtag  
ttgaaa  
agctt  
cgaagg  
attggat  
gactgag  
cattga  
agttaa  
tgtagc  
cattct  
ataaata  
acaagg  
caatgc  
cgaga  
aggtc  
gaattc  
tctctc  
gcagct  
tcttct  
gtgttt  
actcaa  
atggta  
gtagac  
gcctc  
gggtg  
taaac  
gaacag  
agtag  
gcaagg  
taata  
aatggc  
agc  
cgttgc  
taggta  
aaacct  
gaatg  
taaca  
agtcg  
agaaata  
aaaaaa  
agagta  
aaaata  
aaata  
acagc  
agaag  
aa  
attgt  
acaat  
cataag  
tagaaca  
aaaat  
gaatg  
actgat  
tcata  
aaaat  
ggttct  
aaaaag  
taattg  
tataaa  
atggc  
tggg  
gttct  
gacat  
gctg  
ctggt  
tgggt  
ctgtag  
tcagc  
catgt  
atact  
tttct  
gactgt  
accaga  
agtat  
gcaatt  
ggatt  
cttaa  
ataca  
acaat  
atgat  
ttagta  
aatg  
aaaaa  
agtc  
aattg  
tgttt  
gctcag  
atgca  
gacct  
gtatg  
gatg  
tagta  
acgaat  
gttt  
accaat  
cgacc  
atgt  
caaca  
gacag  
tagaca

actgcttgcgtgtaggaaatccattccaggctctctcctcaatgtatcctaaaggtagagtagaatattgtgtctttctgccttgta  
ttcaacctcctctttctaccgtctgtatgcaaaatgtcacaagcagactaacacgaaacaagcttcaacgaaagaactcatcaacgaaagtt  
tgaattgtgaattcattccatgactgtatccatccatgttctttcaacagaacattctttccgtcgaattgtttattacatggaacaaggactt  
aaatcatgatgacgtaattgaacacgatagaggcgctgagcctaagaggcaattactatataatagagaagggtccgcccgtgtgttgacatt  
aactaataggacaaattcaaaacattcagattccattgagaaactcgttttcgtcgttgaatgtttgaacgcactcctatttgaacgta  
caactaactgaaacaatatgacagaagaacgcaatgtaagcacgccgcaaggatacagaccataagatcgtttacaacgttgaacgggttc  
gccacggataaataacttttcaatgatattggcaatgccgtaagaaagaagcaacaccggctactaccaagatgagcagtgaaagctgaacg  
caccgaaagtgcggaaaacttaattgattttataaacctttataaaaaaaattgtacctggcgttcagcagggttcttaca  
actcttattatgtgtttcatgttttgtttgttttatgatattataaccttatgttgtgtagaatctgttgactggaaaatcctaactttctttca  
acaataactatgaatacactatatttaacattagatattcgtaaagtctagttcacgcgtagtgtgtaaccattaagtattaaacaaatcctca  
gcatgattcgcatcttccgggacacgaatgttcttttagaaaactgggttgaatggattttacgtcggcagcatctctgggtggaggggagc  
agcaggagtagatgattgacgggtgactatcccgatgctgatgctcctccttcaagtaaagctccaaaacattcacaggactcccattgat  
tcttgatcatcttgcctcttccattcagctgcagctgttcccactattgttttagaagcgtataacggccgggaggaagaccgaacggagc  
tgaatctccttgccttaaacattgccatgctgaatctagaactcttccggaaaagctaccaaaactcgaactctcaatgacttgcacact  
ttttcaaaaaatccttttttagggcaccacctaactcgcgactaaaggcatatagattcaaaagatagatggtacatatggctccaaactac  
actgaattagcatgcttaactgctgaactatctcgtttcttaccacactcgataccgcaaaactagcgacactccagatattcattaacagca  
ggtcattaatcacgtacaatagccaattttgcctcctttccaatagatttatcattcatcctccgtcattaacctcctcattcttcagtaac  
tcttgtaaatcgctttagaaactatattgatataagtttaattatcttcttctcgatattcacacacctcttataattatcaatgtgattaat  
agaaaaacataaaacacttgcctatagaccctttcacagctcattcgcgtcaatagccattccaactttgccctatctagggtgacagacgat  
gctgacgcattttctcttctcttcttttctgtagctcttctgtgtccagaaaatattgaatccttgtttgcttctctttccaacagtagctg  
atatgtaatttccatccactggctcagtagacagggccgctacggcactctgtcgcgactttcgtttcgaaatacggaaactccttggaaatatt  
tctcggagagaacacattgattgcaatcacagagtcacgtccacctagagcttcttcaacgttgcgtcgggtgtctgtttagcaatgccatcca  
gatgtacaacacagggctttcagatacttctcgtattagcaaaaaatacttgaatgtttttcctaaaagacatacaactttagcttggctc  
caccgattccaatgcataatctcgcgtcgttcaatctcagcctctagtcagacttattcgtctgtctaccaattcaaattagcttccatgacacat  
tataatacatacggaaaagggctgtgttcttctctgaaataactgacttttgcgttctccagctagaacgatcttcatcttccgactatt  
gtcttagctttccctctttttatccaatctcatgatacttctgaactatattccttctcgagcaaaatgccgctgtctccgataatggcctt  
tttctgttgataaattcgtcagcaaaactcttccaagctccaaaacgaactgtttctaaagttgtaatggaaactgatgatcgtgatccattct  
aaaatcatcttctcctcctcttttatttcaatctcatgatacttctgaactatattccttctcgagcaaaatgccgctgtctccgataatggcctt  
gcttaatatatgatgctctgagagtcaactgctacagctcataaatgttagagcttttattgtaaaattttaactaatcataaacaatgatta  
atacaatctgcacttcatgatgaaagttagttcgttaggaacaaactgacatctcctaaaagctagcaagctagcaagctgtttaaaggtg  
aaaaaacactatccaacgtataatctcaatgctttcagatacgtctacgttcaataccttacgttgagaaaatcagcttttttatggattctc  
gactaaggggatggctgtgtttgctttacactattcaaaatcaaaaagcttaaaaaactttggttttatctcatttctgtttgtttacaac  
attggatttgatttccaatgtttgtttatggcatctttcaaatatacatataaaaagaattccaagacttattattaaaataacagttgagaa  
aaaacgaactgagagtcgaagaaggaattagaatggttgacttaacaagaccaagagcattacgggaactcaagtgaatgcaataccctta  
gcgatccctgaaagatgatccatcaatattcaaaaagctgagaaatgaatccgatcgcgagatcggccgctgacattgagcctcatgaacg  
gaggaatccttggatcttgatctgggtgacataactatcttgaacgtctatgaagctaaagcgaatgctttaaaatggaaatataacat  
taaaaagaagatggattgaaaagaatggaagtggttatccctgtatagatgacttattacttcttgcagatggaaaggtgctttacgatt  
tatcgatgaagtctatcctaagctggcaacaactggaaacctgatcgcctctgtaatcgaagtaagtacatgggtgtttctttgatt  
cttgactttgttgaatgttttagtgaaggtttcagctatgttgaatcaacaactaattatagctttctcgtttgaaatgaagcatcaattg  
aatattcaatataccgcgttatttattccttcatcgccttcttattccttgagcttctcgaagtgactgagcatgttctcattatttgtaaa  
atacacctaaaacgtagtgaggtagaactaacgaatcaccaaatcttacccttgaggaaatcaaaaagtctcctaattttaccaaaactgaaaa  
acattttatggctggctccatcgaacaagcaaacactagtcattcaacgagcgcattctggctcgaaaaagttaccttcttgatcaaccct  
ttgcaagcatttgagaggatctgttgagaaatactataaacacgcgtgatattatgagagaaaagtcaccaacagaatattgtaagcttccg  
ttactgaaaagttagatataccgaacgcagatgagagattgacaatggttaaagaaagccagcagctgacccaatattggttggcttaca  
ttcgaaaatgtttcaccttcttccagacttctctagattgagtggactcgtcctctgggctcttccgttgaactattatcagcttattccgc  
caattctgaacaacgtagtttttatcttcaaaaaatccttcttggctatcagtgttgaagaactcttagctttaggttgacaggggtggac  
atatcaatattgattacttgtgtgaagttttcggttttctgttaccatcgagaccgaaaacttttaaatgaattatgcttaaaggtctcata  
acatcctaagcaataaaaaatcatcagaaaaaatgatcgcaattacgggatatctcctatattttatggatttcaaaaatattttcaagcagttt

gttgtgactatgaagcatcactctatctactaacgtattagcttgattggattcttcttgataagcgactctttgtactggatagcttt  
atgaatcacaagcagtggtggatcacttgaattactgcaatgcatactgttagtggaagtatttccagctttatttgatacaaaagaactgcc  
aaaagaattctttatttttcaattcactatatttccgaagcggaagttattaatcgattttcaaccgttcttttactgattaatagggtcaa  
aaaatcctcgttccttaaaaagctctatgttatggtttttattgatcaagttataagctgtgcccaccggcatcttctgaaaatactataaaaag  
cattcagaaaaagtttctgttcatgaaacattattttagatcgcttttgaaggagtctaattagcaactagtgaatccaatggcacacgcgaa  
ggtatcgaaattggaagcgttaataagaaaatgtagtacctgtgaacttattgattattacagaacagtaatacatgctccaatcaagcgcc  
cagacatcgagctgagggaagatcttgagctgcacacacaaagatatatttagcttctcactcggtattgaaagtctgtaatgacaatggtgatt  
tgatgattaccctcgtttaagccttatcaccaactgggtcccaagttatgcagaaaatgaaggatcaagctcgtttctagacacaaga  
cgggagtatatgcattctagcatacttgctcgcaggcagcaaatcaactgtcacttagttatgttaccttagtagaaggcatttgcgctg  
ttcttaaaagaacattatggggatcaccacctcatgaaaacaaaagtcaaggactttacatcttgcagaggattaggaccttca  
tctctcttgacaggatcactgaatccttttctaaccttatcaacaatggcaatcagggcttagaaagttggtgaaaaactta  
ccaagattgatgatgatttggaaagtattcaattcttatcgatggatgcacggaccaagctgtgtaaggacattaaagaagcttacaga  
aaagtggccccttagctaaaactttaagcaactggaaatgaaaacaatgaatttttaatttttcaaacataggacatggctctaaaag  
tcgaaggactcaattataagcatccattgcttgacaaaatccatgggtgaattgctacagatggagatcgtttacagttgccatcagagcttga  
atcacacttgaaaaatctcgttaacaaaaccgaactgcacttctttctttaaataagaagaatctgatcgatgagctcgtgtttggt  
aatgattgatacaagctgcgtatgttattttgaaaaactggttttactaatattgaacttaggaacataggaatctacttctcattgatt  
tctcccctcactactaacaattgcagggttggttaactccggttctctgatcatagtgaagaaaactatgctgaaatgaaaaacagaaaag  
aaagaaggtcactgggttgaacatgcaagaacataaactgcaaatgagcattgtctttccttaaaataaattgattcaaaatgactc  
aacttaggtgaaataacttattacaaaaggcagaaaggagaattaactgttcaaaaattttagtaaaatataaaccttgccttgtaacgta  
aaagatataatttctgtttaaacaaaatattaaggaatccaaaagatcggcatatagggtttttttcacttaacacactgaacaataca  
atagatccaaaacataatcctggttctttactattcgaaagaaatgttaacgaaataagctcaatcgaaaggtattttagtagcagctt  
cataggagcgtcattgtcacacgattaccataagcattcaactgggcttaacagctgtacatattatataatccctcaggaatattgtttag  
cttgacgcaaaaacattaaatagctacactgtcagggactgtctcagggctgaaaatgtatgagcaacacccttggtattgtctacctgacg  
gccaatacgggtgatataatctcaattgtcaaagggaagtaacattgattacaagttgacttggggatataagaccacgagcggcaacat  
cggtagcaaccagaacaggggattactgactgaaaacttgcagggctgaaaggcagcggctgagacatataccatgaataaccacagc  
atataactcttagccaaggtatttcaacacgggcagcttcttttgtacaatacaaacacaaaatcttctcctcaccagcagaagcaaga  
ttcttgagatgcagttataggacccttcttgatctggaatcatccaacgttctattttgagtaaatgttgaagcagacaactcgtc  
gcttcaatagtgacttaacaggatccttcaaaaaggtagccgcaagtgacgaacagattctggccaagtagcactataaaatactgtcggc  
gggcttctctttaaattgattgaggtggttactataatgttacgaatgttctgctgaaaactgataccaacatagatcggtccatccaacac  
aatatcccacgttgagcaatgcacagaccgtctgtaattagatcaagtaagcaccgggggtaccgatgactacactagcattacgagcag  
cacgagcttctcatttaggggaccaccgtaaacgacggaaccttaaaagagacatcggaaagtttaagccttggatatttcatattggt  
agccaactcttagtaggactaacaacaaaatcgcgtgtgttgctttcatcaggcagatttgaagatattgaagagctggaatccgaatgc  
gactgtttaccggatcgggttcggcaataccgacaacgtcttccggcaacaataaggccatgaagctgactggattgagtaggtctt  
gaagtctcaaaccaatctaaattgtctgcgattggaagctgaaaaattcaatacaggtaaaagaggagttgactgtaggatccacata  
attaattcagctcttgcattcttgcaagcagcttctgtccacgaggatgagaggaccctctgttaaagttctctcttctcattatgc  
tacctcctcttgagatgcagactctgaatcggacttctctttctttctcttctgtcttcttctctgtcgtcggattgtccttggatttcttct  
tcttcttcttctgtgtcatgcttggtctttttcttactgctttatggcctccttcaacattttttctaaaccagatcctaacctccttaattgag  
cgtttccattttcaaaatcttttagagtaaagagggagggttgaaggctcctcagtcctcgatccatataaccgagttggactatggc  
atgtaagtgaaaaattatgattgataatggaaaataaaaacaagaaaagacaaaacgaaaataaacaattgaaagcaagttcattccattac  
taacagcaatactcgttcagcttgtttgagactttccctcataaacaaggttagtaaaagtcaatttttccataattactctgaaaagaa  
aataaaagcaaaaaaaaaattcagattactattctatattattaagtcatattaataaacaatctatttctctatgtgcaactcgagcctcga  
aaagtaaaaacaattcgaagaaaaccatgtcctagcgtttttccaaagcaaacagcaatctactctttcttttgccttcttcttcc  
tgtcaagacctgcatgaaagaaagataaaaacgactaaagtcttataaaaacaccataatctatttccatgctgttttttttttatttttct  
ttctcttctcttcttcaatataatgatgttataataagagcagaaaaaaaattcccacaacatttactgattcaagaacctatagaacct  
tctcaatcccacagcctattttatcaattgagataatcagatattaaggattcaaaaattttatctatgcgaaaaaacagttatgcaa  
agcgaaagaaagattcactatcacagtagtaacaagattcaaaaacgattcttcacgttattgaaaaaggaacaaaagaggttgc  
tcttcgaaagcagcatgaataactctgcttccaggtcgttatagtaataaaatggttccccaaaaatttgaagaaataaccgct  
acgttcattgcaactgctgtttaccaaaccattaacgccacaacagagctagcaggaggagaggaacaaaattgagagcccaatgcaatggag

ggatgatgtgacttcgacaacgaggaagacaagccagacatgtcttgattatccgctgtactcttgccttgaagtccaaacttagttaggaaga  
gaggaagaaacagacgaaccagctgcttgaggagaggctgcgacagcagagacctgttcacagcggcaataggaggagcattcccgttgga  
agagggggattcggtagcgaagcgtgctatccgtcgaagcagagccgttgctggatggaatattaaggtccctctcgcaggacgcgtccaat  
ggcgctatggaagatggacgcagggcgtgcccgttgaacgggtaaccaatccacattcaccgaatccataaaaggaggaagacgggttatagct  
attcgaagtggtttctaacaatgaaatgccggaggctgcttcgcccgtcgaacccgaaggaggagcactactagaagaccaagtttagga  
agactatccacactaccgtcgcagaaagaaacgaagatctccaggagcggccaatctgtaaacgacgaaatgggttatgatgggactac  
ttgacagcagcgcgtaaccgatcgacgagggtgtagaagcgcagatgccgtagttcctccaaagaagtgtactctggaacgaggtacca  
agccggaggaatgattggcgaaccaacaatcgtgctaggctcagcaggcgaagtccaagcatattcaggctccattaggggtgctggaaa  
gcgattgctgtaataactaccactactccgtgattcattggtatactgctactaaagcctcattaagtgtgctgggtggagaaagggtcattcgt  
ccctgcaaagctccttccgagctcgtgaggccaacatgccattctcatcaaattgtcggatgccaattcattcctcgtactgactcacaatg  
cagcactgtcatctggttgaaaaacgttggacctagaccatccaataagaaccggcggagaaccaactgttactcattcacaacgac  
ataaagacaacttatggtttctagaatggcactattccaagatcaaacttcaatatatTTTTTAAAAagaagttcaggctgttgggttgc  
tctgagtaagaatcccgcctcggatttcttagggataccccactccccatgattcaatgagagtattatcgcactcaggtgatcacaaca  
agcaggatcataagataatattgtttgaatggatagagtggtagcaaggtgaaataggaaagggaaagggtagttccgtaagaata  
aaagtaaagatgttattaatgtttacaaaaaattgacctatgaagtcacccattgaccatacgttgcacactcagtatgctatt  
tcattcattcaagcaattatagcaaaaaacatatacaaatgctgtattgctatttaaatttagatgttcaaaactcattcagcgaatcctgct  
gctgatgccctcctcggacgaattgttcatcaattgtgtcaagcattcagtgaccacaaagtctcactcctcggattgaagaaactcacttgcatt  
gaaggatcagatttattctgttgcatacttagttgtgacagatcggcaccacaaagacgcggcattgctcgttgcctttccagagcattgc  
atcctgttccgtgatgaaatgcacctcgtgtgagttggcaagaccataaacaactgccaatccatataagataaacgttcttcattaaacg  
gcttctgttggcgaacagtgcaatggcgtctaataaactccaattgctggaagcactgtagtaagcttcgaagtgatcgcattg  
gatactcttgaagaaggatttattcatctgttgcagttatgcgaggcaatgcaaacagctaaagctcgtccttggcgaacagactagc  
tctgttgcagaaactgattcaaaaaagtcgactcctcgtaggccaggccgtccagatctgcttgggttttggatcttttctcctcatga  
ccatcatttccatttgcgaatgtcctcgtatttttagcgtcctgacgaaaaatagctgagttgctaaatcatttctgttcttgcattcaagttc  
aaattatctttgtacgctcctatttactagtaagagagttcgttcttgggacctcgttccagctcagtaggagattcctcatattcctct  
ttcttcaaacggcgtcagaatcacgcatacactgtttatgagcctaaattcaagaaagcaactgttctgtcaggttgcgctcgcctcgc  
agtttcttggtagcacttggtagaaaagtgaaacacaagacatgtccaccaacttagtacctcaaggaaataagcttttcttttca  
tgcagtataatagacgtttaaataatgaacactcgccattgcaacctcaaaaatcgaaatttccaatggaactgtgcaccttgatactgggc  
aatttggatccattgagtaattacaatttttggtttgcctttacaactgccttttgatgctatttccgtcacaatttctcctcagaacttg  
gctgaaatggacgaaatagaacaatgtcaatggagcagttgtcaaatggaaaattgattaattccatgcatccaaatgactttggcgcact  
gcattcttgattcacatacttttaccggctgaacgaaggaaagtgaaaagtagtattcaaataccatcacgaaaggagcattaatatttctt  
taatatcttcttcttatacagtttcttcttctcctttcagttcaattgtcctcagagcaaaaatccacatgttaggtactcctccaattgc  
aaacaactgcaattcatagacgcagttacattgcctgtattgtagatacaaacaggtttcaatttttatttttaattagaagtactggag  
gttttatttttttggggattcgtcctcagttataaaaggattcagccatatacttttttgacattagacattatgagtgatgcaaacagctt  
ctttacacctcgtatgtaattcagtggtatctgtctatttagcaggttatcctcttgaagactaacgaactgatgttaggattttcaagaaa  
attgctcctgatcaactgtcctcactgttagatcaaaatatacgttccgacggaagaacggttactgaattcgtgaaccgaaattcactg  
actgcatttctacagtaacggaagtgtattgttcgagccggtgaaaacgttttctgttggcatcaaacgagaaattgtgaaccacagccg  
atgcacctgatcgcggttgattgtccctaatgtggaattaggtcccctgttaattccaagttaaacgggcccgcctcgtattggcccaggt  
gtatccagcaattgtacaaatttattcagtaagtaattgtcacaagaattcttcagccttttagacattgtaaacatgactactttagaacg  
aaactaattcatctcattcatttgcattcacgaaaagaagcagttgggtcctctatgccgatatagtagcttgaattatgaggaatgctct  
tgatcatgctggacttcttaatgtcagcattagaacaaccaaactcctacggctgttgggatgaagacttggaagggtagtctgtcatcc  
aatctcactcagccgtccaactcagcacaagggtatttcttttcttggctgttttcaacaatataatgttggcggatccaatcgatgaagagg  
aatcttgtcaaacgaattcctaccataatgatggacacttcaaaaacatttcaaaaattacgaagttggcgggtcttttattcaagtcgataa  
gttaaaggaatgcgtagaattgctcgtaaacataaagtagatttaattggacttcaagttgtctgcttaactaaaaacgttattgcttagct  
gtatattttgatccggttgttaggaagtttctatttaatttgacagttcaagtaaatgaaatttgaacattaatttattatgtaaacccaaa  
acaaaacctctatttctcatttaccattcttggttatcatcttccaaaaatgtagtagctttcgtactgttttcaaaaatacatatg  
acagattgaatctaaaaagaaaaataaaaaaaatcttaaacatagggttcttcatcattctttctcctttattaccttccaacatattcct  
ttcgaattccttctgccttcatgaagcttactggagctgtaccctcaggtacgggctcaaccagccatgaccgagattgaaggtagcgg  
cagcaggcgaatataaccgttaactgtcagatcccgttagaacgctttgaaaggcactagaccatcttcttcaaatcacctgttttttca



ttgctgtccaaagaaagtctacatgcctcataggtgtcgaattaacaagcttaccgtaactagactaaaaatgaggactttcactttcgtcgtttg  
aatttgtttctcagtggtggttctgttctgttaataaagaatcacagatcgaatgagagaatgattcatttaaccaggagggtgcagatgaaa  
gcgctttcattaattcgaatggagtaacaattggacgataaaaaatcctagatgtttgttagtacaagaacaaaagattcatataaaaattcatacc  
tactatcaatcaagctgtttccaccatgcgattaaaaacgaaactctatcttctgaaaattggccaactttgcaggattcagtttccgatagc  
caatatacgggtttttaccagcatttagaatcatctttcgaagtctatctaaaacgttttagataaattcgatacacccaaagtaaccaacgataattc  
cgataacacctgcatctcgacattttgaccaaagcataacgtctccgaagttggcaccaccgaaagacgattctcagtaaaagctcctttac  
aggatcgaaagaccgaaagctttaacaacagaataatgagacatcaaaatcgatgttaatgtgggtgagtcgggtccaacaaaaaccaaaga  
aacatcacttaacgaaatatttctggttaaccgaaataggcgtcctggaatcgtgttacaggctccaattctaaatctggttcttcttctaacta  
acgtcgaagcaatgactgtttgtaaccagcattttcatcttccgaataatcaaatctggcagtagtaccacagatatacctaacaagcaaaa  
ttggactgtcaagagggaaacttctccgtaaaactggtaacatcttctccacattaataggaagccttccaatacataaagaaggggaagcctt  
gatgtactaatcaaatgttagagaataagtttttaaatgtattaacatacggagaagacatgctcttccatagtgacaatggcatctgcagaca  
tatgttctgcagctactctacacagccttccgtaattgtatcagcaagatttgaatatttgcacttcttggatagcaggaagcta  
cacgaccagaatctgcaagatgctcatcgggaaactgtaaagctacctagatcacaagtggttagccagactgaatttcaaatataccttta  
aattcaaccaatgcttaaaagtagaaataaactacagattatagttgttcgagcgaataaagtcaactgttctatcaacctcaaatatcagtgac  
aatcacctcaacttttagtgatttccaattgtcttggtaatacacttccagatcctgtaaggttacaggagtgaaagctggaagaca  
tactctgacaatgattttttatgtttgcccccaagtgtatgttccggtgaaataattcagcgtcagaattcaacacatgaaagcaatcctaagca  
gtcagataaaaaaattgcctgcttttagctagtctaatattacttctatcttttaataaagaactaccatacctgacacctacaagaatgc  
ataggtgttatccaatttgaatatttacgcaatcaaaactaaagaagcagaataacaccaatgattatattattaggcttccactgtaaaa  
gcaatttaccatcagcttattacaccaaggaattatacaaaaaatggaagacttcatatgtaataataaaaccctaataaaactcaaaactaaaaca  
ttacacttaagtaacaatggcgagaagagaattcaatttgcaaatagttaaatgaaatccttcacaaaacagtaaaaaagacaaaaaccga  
cgagcagtaacataaacgaacaatgaatcaagagacggaacgatattcaacagctttatatttgaacaaaacatcacatgtaagtaagtagt  
caagttcaatttgttcttccgacaaaaacccccaaaaaaacattataacaagaaaacgtacataaacaacaaaattggcaatgactaaa  
aagaaatgcaagcaatagcagagcttattcttcttaaatcagctaaagtagaatcttttaactctccaaccagcaaaagaaagcatcagaa  
tgtttaaacagatagtaaaaaaaacccccgacttttcttctatctaaactcgtttgcttaattcacaatctaaattcaaaatcaaac  
gtttttatgcaactttgttacacggataaaagatcggtatggcagcttccatatacccgaatcacgtaattttatacacagaattaacaaaat  
attagcttaataagcctgacattaattcatcccccttacttattagctttgaaagcgttgaactcaatttctgcccaggtaacggagggaaac  
caagagcatgtgatttctcgaagccgatgaactagaggctgactgaggaggtgtatgtcagttgtggtgctggctctagaaatggcggtaaa  
gttacttcacaaaaggaaggaagcggagggagattgaggccgactaatgtatgcaagaaaaatcaactggagacaactgcggggaggt  
agtggcatttgtatggaacggtgatgacggagtttagcagcatgtcgtttgctgtaatatgggaaagcacggttctatcgcgagcttgagatct  
cggacgataggtaaagaagaatcatgattgaaagattagcatgagaaagatctgtagaaggaaaactcatatgtcttctgacacaggagat  
gatacagttgaagcatgaatcgagggggcaagaagatcaagaggcataacctgggagagattgaagtcggagctagatctgcaacactggc  
aggagtagaattatcgaaagagcagaaaaaatggaatgattgtcggttgggagattaaggatgcaaggtgcttgtgcttgacctgagca  
ctagtaacggcgggatctgtaaaatcaagatgaggcaagttttgtaaacatcaatggcatttaagccaggtaaaatggcactttgctggcgttca  
agttcgaattgtcgtatagcggcatcatgggcttattgttctgaaagacagataactcatgttctggttgaggaaattgagggttagggacta  
cgtcgttaagccacaagattcaaatcggtttttgtttggatcaaaatccatttgggtcaagagattatggataaggttgggactttggccaga  
gcaactgagagcgttattgatagccgatccttgaagaacagcgttagcagaagattttagccaacaaatctaaatcgggcaaaagctcctgag  
aattcgaacgggatacgcattgctcgtattgtttgagcagaggtacgctcctttcttacgttttgaatggcgacgattgaattcagcctcaatc  
cagttcgtttctcgatactcggttcgctacaaaaagtttttggcctttttgttcacacgacaacgcaaatcgttgcctttattacgctcctcattt  
ttccctcaacgcttcttccgttccgattttcagagcgcgtttctcagaggaagtcattctcctcggaggaggaggtctcaatggcagctacct  
gtttgtaaataaggtcagaatcatcaaaaaatgcaattataaaccagcaaccaagcggctgcaaggttagtgaaccaaacaagataa  
agtccccgtatcattgctttgttaagcttcttcaagaagacatgttttaacaaactatagatacagatgtatagcaacaaaagaggaa  
ttcagactataaccgtcataacgaaagcaaaacttcaatttccgggtcggtaaaaaatttagcatacctgttgagctatgtaaaatgcagctgc  
agacggatcatttggatcaaaggataaggcagaattgttattacttaaaagatcctaagttggataagtcggaaatggctgagagaccgagtg  
aatccaacagctcctgggtgttccagacattcctaaaaatgcctccaggttcagctttgtcaatccgtctcagtcattctgggttctccacgcat  
atatatgttctcagtgatctagcggactgaaaacggttcaaaatgtattctcgttgtttgttagttaagaaagcgaacacctccaccagtc  
ggtggctaaacaatccctaggattatccgcggttcttccacttaccgaatccgttttcttctttgttcgtaactatttctattcgaataaac  
gatataatccatctacattaagatgcatcatttccgaacgaagttcgttgcataatgaagcgtgcataatcttctcgttcgactaccattgggtt  
tcgtttcaaaagtagctttttgaaaggaagcccaagtagtataaagaacgtatgattcgttaggtcattatcgttaggtcattatcgtcgaat

gattaccagtttctacttcaagtcatattgctttacgaggagaattcaagcagacacatatgatcaatgcatgtaataaggatggtgtgattatt  
cccgttatgaccgaatgtagaggaggcgcttttgagtttcatcgtctcattagattgcccacttcgagttagggtgttcatatgtggcatgattata  
ctatcttctcttataaacatttcaaaaaaaaaaacatttactatttatactcgatgaaagcaacgtcacaagcagctcctttgtgactgattct  
tgatagtgtgctccttcttagccttagagtagtgactggcttccatttacgacgtttagaatacgtagaataagattcaagtaaagatac  
attacgaacctaccgctattcttagagacgtttacgagattcgtggacctcagaatactagatttcgctaagctgtttttttgtaaattattat  
aacgtctatcttagattacgatagtagagaaaaactccaatgtaataatgatgccaatgctaaatagattggacacacaccaatatactttaatt  
gtaataatcattatagaatccagggaagaaaaactggcataatattgaaacatgagaacgaaggttagagagctgtcgaaaaacgatgag  
aatTTTTTtacgcttttcttccattttttgtttttttgtttttttgggggttccatctattaagtagtagttagtctgttgaaaaatagattt  
tcttgaaatcaactcatatcttctcatttgatcctacttatcttgaccattcgtttaacaaattataacgcgagtagctctaatgatctaggatcatg  
attaataaattgttgttttcaaagatattggacttacttccgtacaaggcagcagatcagcttcttaccagaccaagctatattgtttacttctg  
ttcagatttccaagaagcaatgggagaataacggtttctcgtggaatgaacccgtctttagcggttgacatggcgtagcatactctgatattggt  
atcgctgagccagcggcgaacaggattcgcctcggcgagctggtgtggtgtagagctcaaaggacgtgacaagctccataaatgaacca  
tgcaatcatctccgatgaagctagcttctcgcaattaggcatccagctcacagcattcagctccacctcgaggactacttagagttgagta  
tgctgttctggcactcgaatacaatcattttatctccgatgattgtgatggaaggtagccatcaaattggcatccgatcacatgtggtaacc  
gcagtaaaggctacaagtaacagcgtgtttgatctcagctacgtttccaataactgctatctcctcatagataatggtgaatggtccag  
agaactatgcatagtcagaacactggcaatacaaatcaattttaaactgacgtaaatgaacattctgacttccatcagccccacgctt  
acgaatacatgggcattatctttgtaaacgcaacatcgaagacttctgtcatgagaatcaattgggtttcgattgttgagcaaccacgtccc  
aaacagtcacggtgtctaaactactgacgataataaagacgggtctacctgcaccaatcaaagaagtgaggggagcactactgtgagtt  
ttccctgtgtaacttatgttagtcaaggacaaaaatgtgtcgtcatcgtaccgtggataaagcagcttggcatgatagagaggcagatttc  
ctgattctgtaggagcattccaaagtcttaattttgatctgttgatgctaaaaggctcgtagaattgtttagttaatgatggagggtccacatca  
ctttggtgacaggatacttaaatcgttctgttgaagcgttttccacagcaggtttatctcctccgaattcgatacttgaagaattgaaatct  
gatagttagtagattggaatcataaagtgtgtatttacaatcttcaagcgacatacttgttggcgggtcctcaattaaactccctacagc  
aatccattgtctgtatcattgcttttaaccaatctaaactgaagggtccaaggaatacaaatccccgacctgcttttcgtattgaattt  
gctggggaaggcccttaggagagcttaaaaccgtccaaagaatcataagtagatttctactcctgcagaaatagaatagcggttcttc  
gtaaatccgtcatggtttatagtcgatcccaatctggtacttaaggaggatgatgctgtaggtatcaactgacccacttttcaactgaatt  
aaacgaacaattaaatacagaagatgcaacaagaaggctggagacaaacgtaatacctaacttttcgacaagcagcctttcagtcg  
gcgacagaaggtgtcatcatagtctttaattatacttacaccaacaaacgcagtagcacagcacagcaaacgtccaaacatttcaa  
gtattatctttagtagaataaaaacgattgatattatcatactaaatagagaaggatgacctgtttcaactaaagtcctctgataattctataa  
agtgaattgtttcaagaattatgacttcttgcgtgaattaaatggaactaaatggatgcaagtggaagatcctttcttactattatatt  
ttttaatgttagcatgaatttcgacgaagtcaattgtagcgaataataatactgctgactgtgcttcatcaatcctaaacgatttagcaattc  
aagtactctttgtacagatcttctcagtaaaatactaaatgataattctatttctattagatacaaggacagatgcttgcataacaggtactttt  
gttctattgtaaagtagctgtggaatgaaactaaaggattccaatgaattgtataccaccattacaataaagtaaacacttgatatatgg  
atttgaaaacgctgtaaataagatatagattgagttactatataagactgtcaagatgaaaaagagtagttagacaggaataaagcattgga  
attgattccttttaataagaatgaattgcttcatactcggctgaccaaattatcgttttaataacattttatcagaagattccattcattatct  
acgacataatacgatattgctgcttagtactcgatactgttatataaccttaggaatcatcgaaggcaaaagaataatccctaccttactaaa  
tcaaaccttgcacaaacgcacggacgacctaacaattatccaacaacgaaataaccgctgctgttcatttctctatattgcaagacagg  
atatttttattttaaataagtagcaggtgtatccagaagcactctatcggtacatcagcaggtatgttgggtgattttaatgaatgtaaaaaa  
gactaacgattattaggtggtttagtgcctgctggacgaatcagaaaaagaattacagatacacgcactgttaagatatatgaatttatagat  
cagttatggcctgagatttctgacgatgttcaaaaattgaagtattgatgaagatcgctcttctgacgggaattggcagcgttagtggttc  
aagggtctattattttgggtgaatacgatgaagccctccaatttgccttggctccggtacaaagttttacaagacaaaaacagcagctcaa  
gaaacctaattttcaagtgattgacacttttcaacaagctctgagcgtattccaattatgaactgagcctatggatgaacgtttgagtg  
agtcttgagggaattttcaaaaatgctatgccaacaaggaaatggcgacatgttttaggtattgcaatcgaagctcatcgtcttgatttagtgaa  
tacatttgaactgctaaagatgatgattttaaacttatgctctgagttggtgtgactgtgcttctgattgaatttgcgaatcgtctttgc  
gtctcttttgagctccttttagtagagaatgagccagattttctcgttggaaagtgcgtagttcacttgaatgacgcttccgttctgcaagc  
tttgatgaaattatcttcaaagtgatgacaagaattttagtgcctaccaattagcttttgatttagaggattctgctcctcaagaatttttaa  
acagtgatagacctctacctgctcctgtctcatcagatcatgaaggcaactccgagaacgtagaggctgatgaatctccaactctcccgga  
tccattatctctgtctggtgagcaaacgtttaaataatcatcggaatcttatattctcataacaatacggatgctcattttaaataagacaaag  
gattctctgaatccagaactcaattttccataatgccgttacttttgcaaatgccttcatgaatttgggtacctcttatgataacttttcgcgaaa

atcttcttggtgtctaaagcgaacaactggtccaaatttacagccactgctgcccttggtgtattcatagaggttactacaaccaagctatgaat  
attgtacgcccttatttacccgaagaagatgctccgtctagtccgtttattctgagggtgggtcttattatgcatgagggtctcatcaatgccaatcac  
ggccggtgttacagattattgctgagcaactgaagcgtccgaagatgaaacggccaataggctcatccttggttaggtcttactggta  
tggctagccgtgacgaaggtcttttgatgccgttaaacctgcttttaacgacaatgccgttgctggttctgctgctggtatttccatgggtctta  
tcatgctcggctactgcatcatctactgctatcgatgaaatgtgcaatagctcatgagacacacagagaagattatccgtgggttgggtattgg  
cattgcttaattgtttatggctgccaacaagaagctgacagataattgaacaactaaatgctgactccgatcctgacttctggtatgggtggtatgt  
ttgccactgcttagcttactggtgactggttaatagcaagattatcgcaagcttctcatgtttctgttagtgatgtaacgatgatgctgacggg  
ccgctgtttgtcattaggtttatctgcttaagactctactgttttaatatctacagttgagctccttgttagatgctataatcctcatgttagat  
ggtagtcaattgctcggattgctgtgtaactctggatcaatgccgtttggaattgctggccgattagttgaggatgctactgactttgtt  
cgcaaggtgctatgattgctcaagcaatgattcttactcaacataatgaacatttaataactaaggttcaggaattcgaagcattttgagcaag  
ttatcgggtgagaaacacgaagatgattggccaagttgggagctaccttagccaaggtattatcgacgctgggtgctgaatgttactattgccct  
tcagactgctaccggtagttgaggcttctaccgttgtaggttggcagtttcttaccagattggtagtggttcccttaactcattttatgctacttt  
cattttccgactgcaactattggcttgaacaaaactggatggcccaagtttaatttctctaatgctaagcctaaattattgcttatcctgc  
taagactgtcaaacctgctgtaaacgttcaaaaggctgaaacagctgactgtcaactacggccaaggcaaggcaagagcaaaagcgcgct  
gagcgtgaaaaacatgctaaggagactgaagacgatgaaagttgacaagaacccgatgaacgagaggcagacagcagtgctatggat  
tgatgaagaaaaactgatgacgctaccaagtctgaatcaactagaaaagaacctaagcgtgaagtttagaaaacttactcgtgtggttc  
ctgctcaattaccgtacatttcatgtaatgtaagataactatccagttcgtaaatttactgggtggcgtgttgatggtgattgatcgtgaatctg  
acaagccccagatttgattgagttgagtagggatgctcaacccacaggctaatgctgaacctcagagcaagaggcggcaccaccagagg  
acttcaataccctttgatgatgatgagtagtttaattctatatacagggtgaaaaaaaaaagtaaatattagaacggcttctacgattt  
attctagatgattattacaatatatacaatataataagcttgaatataatcaattttaggttatgagaacgtaaatgttaacagtggtggccac  
taaaggtggaagttaaagtaagattaaacgaacggcaggttgaaaagcagtagttgctattccatacccttttttagttcattaaatgctta  
ggttttttacatcaggccttactgatgttctgtgctgagctgataatgtcaaagggtggatgctttcttctaaagtacccttctgaggatga  
gttaactcaaagacacgtgcatatgcatatgataatgtgacctttacagcatcactacttccggcaaccagacgaatcgggtgctatacc  
attgtacttaagccgtgacaagattatcgagtgaagttctatagggaacaacctagacatgccagggtcccaattggggctctgcaaaatt  
tgctgacagctataacccttgaatttttctgttacccttaaacataagaatggcgaatattgtaacgatactccttattgaatttgcacgtta  
gtattagagaagctactttccagaaaatcagagcctcctcaacagataggccaatgctcgtgaagttagtaaaggaaattgaaaataataacc  
tttaagaaaaggccatactgaagacggctaaaatggcggaggtgttttcttctcaaacattgtgaagatgctggcacacaagggaatg  
agggaacaagactatcaacctgctgctgtaacttaccaggttagctgacgacagatagctcgtgctcaaatccttactgagatgatt  
aaaataggcaaaagacgatcatcttcatctaaccggtgaaagcttttctgtatttcaagagatgatttttagatttttctcaaatcctctatcac  
gatacttatctgttctgaaaaggtacatatgcaaaccttttgaacaaagacagctcttctgtccaccaagtcaggcttttataaagggtact  
ttaaaaaagattcgtttccacgttctgtggcagcggcttgattttactcaaaaactggcttttcttctttagaaactgattcattgaaaa  
ttaaggctgtaacaaaatattggcgtctctgtttcttattgataaatctatattaaagagagcagattcagcacgaagaaatcgatatctta  
attcctctctattgtcaaaaaacatgtagtatatctgtaatgcatccacaaaagaggttcaagttaaaaataaaagagagcgcgtccttttc  
cgtcaaaaaccgaaacgattagcatttgagcagcatcttaactcgatacaataatcgaaaatgtccggctgtaaaacttctcaaaaggcacc  
ttcacagatatgaactttgtcttaaatctcttttagtcatataatgtttttacttacgatctactgaatgcaagtcgaaaatgaaatgagaataat  
ggccttctactgttctgcttagggcctcctttgacgactctagccatattactgctcatgggcaaggtttatcaacgacgctttaaataatca  
tatccagttcctttctgttattccggaaggggctgactcaattcgcctaatactattatccagaaggattagaagcgtttaaatttattgata  
aataaaaagtagatataaaagaatatatagcacactgaactaccataaagtcgatcaattgccatgtttcaaaccttctactgatttctca  
tgggggtgattcaagtaaaaattaatcgtgtagggtaactaacgtttgctggtacatctctgcaaaattctgttcttctaccgccctgcttttg  
tgctcgaacatggtgacgctggtgaaatttccgacttgcgattggggagcccacgctgagtcggccctcacaatataaattcaggttgc  
aaataatggcttaaaatcattcaaatcagaaactcaaaataaaccttttcttcatgctgactactgaattaatgaaaaagtatctgaatac  
attaatctcagtcattgacattgacattcacaattacattacgttgttctacgaacgcttttctagctgatataagtatgtattaaatctgaaaat  
gatttattattagatcagtgattcagttcaaacctaatacaaacagaaaatgattctgcattttaatttcaaaatccttctccgctcgg  
agacaatttataagccctacattttatgcaaccctaagcagtagtaatctactgctgttggcgtttgctaggaggaacgtaggctcctct  
ttaggaggtgtcaggttaccagagaaggtcagcactggcaccggcaccgagcagaggaggaacgtatctttgaccaccaccagcggtag  
caccaccagtttccatgagttacgggtggaggactttgagaagctaagcccaagtagctttcttggcagcaatctccgagcagcgttcttct  
acgcttattgcatcactcgttgcgttcaagtttctgctatttctgttggcagccttggcttcttagaagcagcagcgttttcttaccg  
ccttatgttgacttcttctgttctctgctcagcgttttcttcttctcagcggcttagtagcttcttctcagcctcagcaattgcatcagctaac

tctgttcgtaaatcatctcgtattgtttttcacgttcagcttctataacatccttagcacgagcataagcttcttgataggctttttcacgttcatcatca  
atgctttgtttgtaaatcgtgaatatatgaagcaaaacttagaaaaacagtttctgtcttccaaagcttcttcatgcttgcgttcttgatctctacgct  
gcttctcttttcaatgaaggttttacgatcttgttcgactgtttccttgcacctcctgcaacaggggaatagcttcacgacgataggcacgttcca  
aatgatcaatacgttaccgataaacgaaagtcgctcattcatgcttctattttgttctcgacctgttcgattgcatagctctcaattatcagcatc  
caagtgttccaactcttcagcatcgacttccaatccacccttggccttaagttcgtcagccagtttcttagcttctcaatacgaatagcttcttttca  
cggcgaattctgtcagcattacgtttcataacttcatcttgaacacggcgagattcagcctcggcttctgttttcttaagagcacgttgagcggc  
gagttcagcttcacgctgagtagccaaggtatcagcttgaccgacgtaactcaagcaagctacgctgagcgataaacagccttctcttctgctc  
aacaccagctaaagcacggctcataagcagcttcagattgttcttcaagaaggcaaaagtcagatcaaaacgcatcaagacactagtaag  
cgatttgcataacgaaagttgatttgaatcagttctgcaggggtggattgtaaagatgtagtccacctgagagcttactggactagtgaa  
aagatcagatgcaaaagtaattgagcttctgatgtgattgacacgaacggaaaaagcacccttttgttccgttcattataaattttcaatctga  
ccagaggtgcaagagtaaggttcatcaaaagtagccaaatccataacgaatttaagggaacagcatcataaactgggagagttgttgaaa  
agacgagtaaggataactgttgaaggacgaatgtattgagcggatcagttctcagccaatttctcaaaataggctgcaacttcttgcag  
atacttaaagggtggaaatcagcttccaaaattctgtaaagatcgcggatagcgggatcacagtagttcaaaacattacgggtaacagcatcctt  
aaccaaagcctcacgattgggggctttagacatgttgagcaaaatggcctaaacgagcgtttttgttttagcatcttccgctccaggggaggacc  
tgaatctagtggtcatcaataataggaattgcaaaagcactgaggataacaaagtttagcagtagcaggctttgacatttgaaggtaaag  
tatctgttccaagcagcagcatgcaacaagtagttgtcgcaaaccaagaaaatcttgataagtttgcgtaataatttccgagcatgacagggga  
aggggcacgcttggagaatgttaaagactgtgaatatcctcaattgagcggaaagcctcctgcaaaagctcaactcgacagctacgttgagtt  
gagagaaacgcatgtctaaatgacgttgcagctcagcatcgttcaaatgattgaatgaggcgcattagagaatttggaggcatttccaaggt  
gagaacgcaataattcaaaagacgacggaattcagcttgcgttgatactttaaagcagaattggaaggccgagttggaattagttgatacatg  
acttcaagcagcattattccgcaaaatgtcaaggacagtagataagcatccaaaggaacttgagccagggagtgaccaaacgacggctc  
gtacgggtcttgacatttccactgagacgaaagacatcatgatgcttccggagttcagtagcctccaaatcatcgacatattcaagagaaatc  
ttgtcagcttagcttgcagcttctgaaccttttctgttggccaactcaatgaagcgttcacgacatttcaatggcgggtcaccgaggtgtttgtaca  
gcatcttgcacatgtagagaccttcttggcagctttacctttacgtaaaaaagacacaaaagttcaataaaagcgaatcatgatagttccaagaa  
aagccttgggcatttctggacctttcaagacgatggtctcgtgaagggaactggagtgacacccatgctgatcaagagcaataagctcatcggc  
aagctactgatgttagctttcaataaaattacgtgaaaaaacgtactcttagcacatttccggcttccctgaggaggtccatgttgcggtt  
gtgaactaaactgctctggttaaatttttgaaggaaattgtgcgttggagcgcataggagctgaacgaacctcgatgagtaataacttctc  
attatataatcgtatgaaataacacattgtatcacttaacgttagtatgatctctgtacaaatccaagcagcttctaaacaacagataaggga  
gtacaccgagataggggatgacttaatacagggtcataggggaagaaaagtcctgaaaatagctttgaaaggactttaaaccaggtgagct  
tttcatgcaagcagataccaaattcactggatggtccaagtttaagccggaggatcttgccttccaaccagggaggagatttcatatcgagt  
gtttatcccgatttacgactgatgagccgctagaagtcacgaaaatacatatccagaacttccggaattgattcctctctttttcttaccagcc  
gacgttctgatgtggtcaagacgcttccggaagcaaaagttgaaaaatcaaaagtagtagattatcataccgacacattgcctccaaagatca  
aggaaatgtggttacaataactactacgaaatgcaacttaccagcagatcgcttcaaaaggttataggtatgttctcctggtactatgagcgccttc  
tatcctgtgactcttcttgcataaaatgttattaaccttgaattatagctaaagatcctcataatgataaccaatttccggttcttatgacctgg  
atgagctagatgcaatgtggtgatttactacaatgaagcgcgagcctcctcagatcctgcttgatacctctatcccacgaatttctgaaattatg  
cttaccattatcgctcgacattggctcttctagatgcatggattccaagattgaacctgttcgatagaagatgagctcgatggcgttgtgttat  
ctgtaatgagtcagattgtgaaacaagtaattgtcattgtttctgtgataaattgcaacatggctgttcacaaaattgctatggcattcccttctgccc  
tgagggtcagtggtttgtaagcgggttacttctgccaacgatgcatatcctgtgttgttgcctgatcgtgatggtgcttccgcacaactgt  
cgatggcgttgggtcactgcttctgcaatggcagttcctgagatcttttcatgatgctggtcgttggatttgggtcgggattttatgctattc  
ctaaatctcgctggaagctcatatgctgtgttgcactacgctggggtgcttctgtacaatgttctgagaaaagctgttacacagcatttcatatt  
acctgcgccaggcgtgctgattttattacaaaattcatcctcttttagtaattatagcaaacagaggtagaatgttctgcgataaacatacgc  
ctccttctcatctcgaaggtgcccttcaacgactttatccactgtcttgcagttatagagaaatggcttatgatgtccctttaaactatgttcttg  
tcgggcaccttctgctgttccagaagaaccttggaaacttgcaccattacctcgctacattgtagaaaaagtaacgtccacactcaagagttgcg  
gttgaatgacaataccaatgacttggatgttattattattgacatttgaagtaactatcaaatgaagcgaagtttcgacgagacgcaccattgtta  
cggctcagagacttgcagatgaactgtaaatcttccagtgaaatgccatcaaacgacgctatcatttctagacattgcaaacgagcttctgga  
caatatgaagaccttattcccttgtgaattgactgctcgtcgacagcgaataaaaagtaattatcccagttaaagaaaacaattttgactacta  
tttatttcttcaaaagactcatagaagacagcttgaagaatgtccagttggacacaaaaggtatctttaaattcctcttggagcacgggtg  
gattggttggatttcttgaacaactggttgaagtacgatattgatatttactttggaacaatactgtctcatatttgaacatagatgg  
acttattcaaaagtatagatgacatggagcaacttaccgctgctgtgcaactggctcagcagtttggagccgaaagccaagaaaatacttgaagatg

ctcaaagcagctctgaatcattcaagaaagatgaccgtggaacttattcttccgctactaaagttggaaggactcgaatgcgttggtggccgg  
actgttttggtgatactgtggagcaagcaagctggaactcctccgaagaagcttccatagctggagagttttgtataaatctcagctaga  
gggaaatacggctgtttgcgttgccgattttctcaagtatacaaaatgaacaattagatggtgtaaagcacctgaagctggccaagga  
agtgttaaagaaataacaccaagaacaaaattcagataccgagaaggaagaattcgaggctaagaattcgatggctccgacagtgttccg  
aacttagcgagacgaacgcgttcaatgacaaaaataatgaagcggatgaacataggtccctcgttgaccggttctctgttaaaccgttttaa  
gggatgttaataatgtttaaagctttcttttgcgtaacaatagtttggattatttggaaataccttactttcttctctatggaccactgacttg  
taattttgtaatgagttgattgattataaatacaacataaatatatttttaatttttattcgaattgttattcaaccactaaaatttctag  
taagtaagcttagcactttataataaatcttacccttaattgttatgaattagagatgcttggtgagcgcattcatagaccaaaaattgattg  
gaatttatcaagttgtttactttaagctcttttttcttcttttctattttatcttttgacaccagattttcatccagcaaacgcatttatactt  
agaaaggattcgctatattgattcatagtttaaccataatgacaacctcaattctcaaagatttagtggattacttgaacctacgaacttatata  
gtttctgtagtagcgtattcgtcgagcaatcgccagaaagattgggggagtcgaagagaggcgttgaacatagggccttccatgtttaca  
aaattgcgcaagccttgggtcaagtcagctccttgggtggttttctagagtaagttgattggagaaattgatgcaagtgtaaagattgtaa  
tgacctttacattaactataactggaatcccaagaccatcaactcttgcgtaatggctcaggtttcccaaacgcatttccaaatgaatt  
agtcgatcttcagatgaatatgttaacacttctgagcaggtaaaagatatttggaaaagcgtatggcaaggtaacagaacgagttctcaatt  
aatgcagctcttctcagacttggtaagtaagctctgtgtaagagggttatagtaggttatcaacttcaactcttctggttctgcagctcat  
attgctatcactatgcatacggaaaagtaactctcttcaacgaaattctctctctttagaaaccagtttaatgatcatcgcttctctgctccgca  
gatgtgaaccccgactccgaggccacttaagggtgctctaatcacggtgctcaaaaggagcaggtaatggcgcacgaaacgtctctatag  
cgattgcaaaagaatgtaaaatcattttctggtgaggtagaatcatttagatttcgactaaactttctatcagtttcttatgtaacggagcg  
agatgaatattctggtaatgatggttattctcattttacattctgaataacaaattacagagttaccatctttccactactaagaaaacaagaaa  
aaggcctacatgtgaagcggtaattcaataagtgatcaatacagatgactttggaacagaatcatggcatatttctactaaaccctagaag  
actgaaacaagaggacaacacatgtggtcagtgaaacttcttcatctacgatttaaaggcctttacgaatggtacatggattcatgtcacag  
acctgactatgatgaagttaactaacaagagttgtaaagaacttagtatctacttctgactacaaaacaaattaactctattcattcattaaa  
ttaaataagacaatcctttttcatgcttatttcttggcagcgtatattggctttcggtgaaactcggtgactgaatgtaaccaccgagaatt  
gaccgatgtctgacaaactatggatagatcatatcacacttgaataacaaatttggtgacactcccaaaatctctgtgaaaatgaagttcata  
ctttatgtattgtaagtaataactagaagactgttcttacaacaccaggcttccattttgttgggtgtctgttttgaagtctatacagca  
gcgccaacgtgtatgctgcgacagtaatgattcgaagtcgatccatatacaaatgggcttaatgtgtgctgtgtctgttcttgcgattgcc  
aatgtattaaaggcactcctgttggatccctacagacgttgaattagaattgctgtatgaacaatttggataacactaacagaagccatgcttt  
ctgttaccacttactcgatcctatttctatttcttttttctgtgtgagcagctcatgttctgagttttcattcaatgctgcattcggaccg  
aaagacaacaggtgcagctgacagaacgtcaattccatctcttaatcgactcacatgtgcttttctgctttttagacatcactctcgttt  
atgtgtgtagcagcactgattactcggcgtatgtcgacgcaatactcttctgtgagtttccgtattattcattaaatgaactgtggaagccg  
taaagcttgggctttatgtttatgaaactcgtcatccagagcaggtatggcaagaaaaagcgtctatcttttgcgattagaggtcgctcagattc  
ttacgcttctgttacagtaccctcctgttttcaacatacctatgtgagcttccctgtttatgcaattcgacaactgtatattagcttctattcgct  
gttccgtcgccttctgtaacatgcccgtatcgacaagcaaccgtgatggaagttatgtatcccaccgcaactgaagaacaactttcaattct  
gatcgtacgtgtaccatttgacagagaagaaatgttccatcccgattttctcctgaaaatattgaagaaatggagcctattcctagaggttggata  
tgactccaagcgtttaccatgtggtcatattctgcatcttactgtcttcaaaatggctacaaagacaacagacctgccccattgtcgaagacct  
gttttggagaacatgcaccttcaactgcagctagtaacccaagcttttaccagttctactcctaccgctgccgaaggtacaaaccagaacaca  
ccagatcattttacctatgccaggcccagggaactctggcttcaatctacaccacaagaatattgggaactccggttacttcttgggtcaaa  
ctccaactattcatgtagaattcctttacctaattggatggagtagctccctataaccgggtgcatagatttccgctaattggccccaaaatag  
ggctggtgatagactgctgaaggacagttgacggcggatccaaactatccggaataataccatctggatggcgcttgggtctagaataacc  
atccggttgttctctttacaacaagcagtaacctggttgggaatcttctccgtaccgttatcaaatgcagacttccaaatgcaatctccttacag  
gtcgcaccatcgaaaggcaacaattttctcgccagaacagactccattcaaagcttcatcgaaaaatagatgaaatgcgtagtagtaccga  
tcgcttacattatgacatgcaagaactcgttctgtagtaagaatcttgagtagtataaatgaaaatgctgttgcaaacggattatggaactt  
gatcaacaagtaggaataatcccttattcttctcagtaggagaacaatttagtcagcggcggctgtctgtcagattcaacgcacgcaaca  
ccgactcatagaacccaagaatgtacaattagaacactagatgaagattcatgaagtttggataatgaaaattgacggatttagaaaa  
cttgaatctaaatgtttatgtaacttaaatgaatgatcaatatacgcagaaattaccaatttcttcatgaccgtttaaagtcagaacaaaat  
tactattagcatattgaagttataaataaataaatcattaaattagtcgttttctattatcgtaacgttttatttagcatacgtattctttcatgattg  
taagtagtacaggagttagaatcaaccttttaggcaagttcagaaggagtctcaaattgatttttgatgacgaagtaggggttttctgtgagca  
aggcttcttaggttctcaggctgcgtctggttatagtgagttctgtatggtgagaatgatagtgatgcttccactttcatttttaagaacggc

gaagaatcatcttggggcttgactagctcattggcaacaggatcactaggaacggaagaggagctagctggcgtcttcaaattcatcaaattc  
ctttaaggacggggctgttctgatagaaggagttgttgtgtatatacaaaaaacacctcatccgttgaaattgtcatcatcgattgagttg  
acagtttgcataattgctgtacaatagattccagacacgtactcaatctatcacgaatgacagagaggtcagttcaaactcttcgagttccata  
aagattgttaggcatagagactttaataaacgtcgacaagtctaacgtgaaagcagcgatgaaacaccaatcataaccatttcgctgt  
tgtgtacaggcatagactggattgtaaaatctaaattgtaataactaaataaaagcgcaaaaataaattcataccttttggaaaagtttgag  
atccgatcaagcgactacggcagtcctttgtttgcccattgctcatagaatcataataaaaacattgtgaatctggtacactgacaaccataagc  
gaccaatgagtgccgctgtcccagtagcatattgtctatgctcattgatgggcataaagatgtattgcaggataaaaaggtcctgaggagagca  
gatttaagctcttctaattgatgaggagcctcagcaagcagaagacaaggaaggtctcaatagcagaatcccttcgactgagttggcgtaa  
gggaaacatagtcgctcaactaatgtatcgacataatcgagtgctacgctgtgaaaccagttaggttttctaggtcttctatgtcttctgtttga  
agcagatatacaaaatccacgattgtatcattttgagtcattttgtgcgagaaggacaagaatggcaaagaaaagtataaactgtgaaggg  
aatcactaatgtttttctctgaacggtagaaaactctcaaatccaagatgaaaaagggcaaggaatacaaaactcaaaaatcaaccgacaaaa  
tagaaataaatgaaaacttatcagaacctggaatctctggaaaaaatacacacacacacacacacacacagacttgcaaaaatgctagg  
aacgaggcgaatatcgaaggatggaatcttctcaatcaggcctcaagtatattaataaagaaaaagaaatagtgctataatagaa  
acactaagaaaatacaagaatcgctggaataaacaagcagggaatatggcgtaaggaaaaatgaaaagttccctgatgacttcagttatc  
taaagaataaagaactagagtggtgtgttatcctacaaatggcattcgaaggaatagcgttaattcataaataacgatatcagcttctagta  
gtaaaaaattctataacataaagggttagctctgaagaaagagagcgggtgaaggggaagaaagtaaggaatatgtaacggaaaaaaaa  
aacagagcttaaatcataggacaacattttgaatcttcaaaactatacagatcggccatgacaggagaggacagaacaacaaaaagaca  
aatgtacaatgggcaggtagaaagaaggaaaaacgaaaggtgaaaaggtatgaaagcgaacaaagttatagaaacgatacaaaacaac  
acaaaaacaatgaattctttcatgggtgatagaaagtttgggaaccgtgacaaaaatgttaacctattgaatgggatgacaacagttatgat  
ccacagtaggtcgacgaggagattctgagtatagggagttgttccagctgctgattgttgttgggtgctggaagattgagctggtccgtg  
ccctgtatccgggagatgctggaacgctgatgaaggaggatgtgctgaggagctgctgtgtaaggagaaccgacataatgaggactagggg  
gagaggggacaggatacacgggattgctgtggaaggcgacaatgaggatactggggaggataggtacggtttgagtaccagtagaccaac  
aatctgcataggattgaagatctcaagagtaataaacaagttaaactcgttaaaaaggaaaaaaacaaagctcaaatgattcatttctgcac  
gggattccaccgactttggagtagcggatgtgtgtataaaagacatcgctaaaaaattgtctgacagcagtgaaagccagcgataaaaaccgat  
gaactgaaactattaatcaaaaagagaaatgaaagtcctgacaatacgggtcaagataaattaggacacttaaaatacatcattcgttgc  
cgggcagtttttaggatgcttgcataaagcatgaaatcgaaatcgatggaacatttttagctgaaaataccaagcttggattctttaaactgtc  
gctgaaaaaggtacttcattagggcttttcttctgtcgtttgtcattcaaacgcttaaccgcaaaaagaaacgtcgacaatattccagtaaat  
actcttggtaaactcgatgctcatgctcctttatatttgataaatctgttcagatgttaaagcgtacatgccaggtgctatagagctgagct  
aatagtaatagttggcgaaggacaagaatgtttttctgaaaacacacatgacgcaaaagtccaaggacaccactagcgtctataaggatt  
cgctgactctccataatcagtaaggaaagcgaacacggctcgttaattctgtaaacagacgaagaatgggtgtaacaaaggaacattcaaa  
gcaaaaaactagtgagtagtgcgaaaagatgtagaggtcttaaaagccatttcaaatgaaagaagccttaaatgaaagaaattggtttc  
gaaccggttgactggtggcgacactggctgtagtgcctgaagagaaaacaaacaaatgcatttccgaatctcattgcttttctcaccagttt  
cagtaccaagtttgcgaaaatgttgtttgatgtaactgtgtaactctatgcatgcaactgggtttgtctggtttcaatgtatgtaaccgtaggaa  
aataaacaactgcttaagcgtgctaaatcagcggatgcgaaatgactgacttttggctgaattgttctattgtttgcaaaaagataagcgtc  
gtttttatagcttgaatttataaaatccgtccatattgttattactgcttggcctcgaagaaccttagcaacaagtcgatcctacatcatca  
tagctccatacattgccgatgataaagaggctcatcggtgtctatttgggatcacaatcatttgaaaaaaaaaagggtttccaatttggtt  
aaaacaaactataccccgtgcctaccagtttggttatttactcctataggaacactagaattgaattggagaatacgtcgactgtttctgtt  
cgagttcttttccctcaaatattcttcttttattgaaagaaaggaagccaggatgacaacaagtatgggattggtgattccctgaaacaaaa  
aaaaagagagaaggagattttttcaccattgacaaactttgaaacgaggattctgctcctaatcattttgcttactgtttcattttgttattgattc  
cagcgaacttccataataataaacatccaatataataaaacagttagaatccattggtaaggaaacaagaggagtcagttatcaactgtt  
gaattggttacagtaattaattggggaggtttgttttttattgttttaattgaaagaggaaaatcttcatagcttctgtgctccata  
tcaattattgattttgaaacgtgttttctctgttttcttgaatcacaattgttcttcaattgtcctttataaatgggcctttgttccagc  
ataatagaagcaagtatttaaacagagttattgctgtaactagccataaatcacataactctgtccaggcattgaggatcaaaacctttctg  
ttggcttgattctccatttttattgttttttttaaatgtcttttctgtataccagcttttccacaatgtctgtgttctcaacaaccata  
agaagccagcaaacatgaaaaaacctgaaaaacaatgctttcaagaagcgacatcttctatagctctgtctgctgggtatattctcgt  
ccctacctggacgatacgaatgcaaaaattgtttataactgttaagttttcatttgactgaaatctcgaagcaatggacagcaaaataatgct  
tgcttgatatttcatccatgtcatgaaagatatcctgcaatacaaaaaggaggagtagctgttcttttttttggctttatgtctttgttctt  
tttattatcagcgaagctaaacatgttaatacattggactgaatgaaagtaaacgcttccataactggatcgctgttttttctttaaagtc

ttgcaagatattcaatttccaacttctttaatagtggtcaatgttctcaattaatgaatatattgaattttattcacagctcactttcttcaat  
agtacgaaactcttttcatcaatgcagaatctagagaaagccttcttagattcaggatatacgataagtaagcgttaagtaaagattcat  
ctatccattgaattcatatttctgtcttctgtttatgttatacatctggttcaaaattgatggatcaccttcataactaagcgttcagacaattttca  
ttggaaaactcaacaaggaaagaaatattacataaatacttttattcaggcttgccctctggtatcaactaaagtttcagtcagcatgccattcc  
acaacagcgcataatgatatttctgtatgcttaccatgcacattccggttccatttgaagcatttctgagtgcttttctgttgaccattgatcgtgt  
cactacacacaatgtaatacacgctcttcttccaaggtgcatacaattcagtaacatttctcaaaacaatgttcataatcatcaaaaccaac  
caaagtgcccacaaattctctcgttctcataatcacccataaattgatccaacgcatttatcaattaactctgcaagattagttgcgttcggac  
ttcataacgtaaaaagcttcaagaataatcttttcatgattctcttaaaaatccattgaaattaccgttattacatacctaaaggtaaaattg  
tcatcgacatgggttaagtagtatggaattgtacctccaactgccaactgcttattaagttgaaagacctcataaacattttgtattttattt  
gatttattttcttttttatttggccttcttcaaaatagataaagctttcacgcgtatcgactgtgtgaacgaattgacgattataatgaatgct  
cacttctgataaaagcgttacataaattcttattttgttggttcaaggcctcgagattccatgcgcaagtatttatcatttgataattcagaata  
ctccatctatatagtttaaaacaagtattatgaattcagaaaagacacaagaaagaatgcaattgaccagattgtggacttaactagatcttga  
acagtaaaaatgactccagttcttcttctacgaagcttcaaaatccggttgggaatcaggacgcttggagacactattgagctgttaggtgat  
agtttcttttgaccggatagccagtcagcgttacttcaataaggtgttggcaactctctattcacttggtatttctattaggcattatactcaaatc  
ccaaggagtacttctctgcaaaaggtaaaagccgttccccgtttcccccaaaacaagtgccttaccgtatttaagttctagttcctgctctt  
cttaaaccaaatgttctcaaggtccagtaagccttattatgcagatctactgatggtatattcttacttaaaaaatataatggggatgatttag  
aacgaggatttggggtagtaagattcccttctgcatcatgtctccagatttctgtgatcccgcgaaaatgatttctgcatgtttgcaattact  
acaaccaaagatccctgcttggatgagaggacaactcaatcagtaacctgacaactagcttatgtaaagctaaccgcttgaaggatttctgaaag  
tctttatgcaagcaaatcctaattcaattgagcgagctcaacaagccgcccgtctgatctcatcagtaacaaaaatagacagaacaggttaagt  
ccttttcttttcttagagttgttgcagaaagctaactgaaaggtatttgaacctaatttccccaaatttggagcttattcttagttaccac  
gacttcttccaaattaccatcgcaacttttagcatcacataggtttggctacggagttttttataaacaacttcttcttaagctctccaacag  
ttattgacctaaccctgttgaactgcttaaggttctggatgcttttcttctattggaacgaagatagcttaaaatagcagaagatttgtt  
ccttacttcaattacaactcaactcttaaaaagcaagctcaggaaagctgcttacaattttcaagagcaggaaccaagcctcta  
ctacaactttagaatccattcatctttaggttcttttcttcttccaatactcaactgtctcaattttaccacaatttgaattatgggtc  
aggcaacttcagagcatcgattagattactgtgtgtacaatagcccttcaaaagttgacacagatgaaattccgagtgaaactcatgatt  
tcagtttgagtgatttgatcagtgaggttacagaaaactgaacaactctgaatcacttctcgaatatctcaagaaagatgttattgaagaa  
agtgaggaaaatttcttatttattacatcttttcttccgttattggaagaaaccgagaattgggtcttgaactcagttccacttctctccc  
ctttgagacaactagcagcttaccacaatcaagttatttcaacgttagcgaatgatgtttataaaacattagtaatgggtagtgactattcatc  
tgctctatcatatatacataatgatcaagttccagttctggtcaaggaatctatagcttcaaaagttgattgaaagcaagataagagaattaat  
cctcttggatactacactcttctggactctgacagacgaagatagctatgtgatttgaatgttattgctgctttagtatcttcttctgacaagt  
atggagatagatgatacaacttcaactgagtatacaaaaggtagaaaagtaactcaaccgatgaaacattattgattgggcaagctatatacaa  
agcatggagcgattgggtgaactgacttcaagttatttggcaaatagaacaacatgttttagttctgttgaacgctgtggttatagatgtcaaa  
atatctgtttaaataatcgctgaattactatgtcgttattcattgagtgatgcttttattgaaatcagccacagctattttgaaatcagaaaagacaga  
ggataagaagtttctgagagagccgcttcaagttctgattcttctcatttgcgaaatctgtaaccataacttggagatttaagtttca  
tgatgaagatgaatttctgtgagcaatgctctgactggttaataaaaacgaggaaataggttcttttggatgatacagacatgttac  
gatttttatcatgaacatagaggtcttttttgaatttgaattttagaacaatcattaaaaataaaaaatagtatatgcttctgta  
acttaatacctcgaaaaagcactgtcaaaattatgtttaagaaacttagcataaacaatcctacaaatttctgtaatttccattttctca  
agtctatccttagccttcttagtttctgttccatagatcagtagctacttatttttccattttctaaatctgtagcgtcacctgcatacgaaggtc  
tcgctcttctcaactgtccattctcgacgaaagccacaactaaagtgaaagctgctcattgggtataggtctatagaattcttcttaaagcat  
tatttcaaaaaggtgacgtgggattattaggatgaactaactgtctcatataccaccatttagcataatcagtaaaaaattagaataaaaagc  
agataaataggttgggatagcaagacaatccgttggggactttatttgaagactgcctattaagagcttctgtaagcaaatatagatgattg  
cttattcgaaggaagccttcttagattctgcatcctctgaggacaatttcttttcttttctatgctgttttctgttacccttccagatgac  
ttataggactcgagagcattagtgaggtcttaatgatgacatttgaccctctgtgctccctttcaataggacccttcaaccaggaactcttattc  
cattcaactgtataactcatccatttcttctgttatttcccaatagcatgcatactgagttttgttcaaaaagaagaaccactgggtacg  
tctgggtagatgctatagataaaacctcaataatacgtttagtgcgagatgtcaatagatccgtaatgtaacagctggttctgacatcggag  
gagctaccggttatatactgtactttctgttccatttctcatgtttcatccattaccaatcttaatgtcggaaagctttcatccttaagtaa  
ttcattagccaagtagtatctgaacccaaagcaataagaaaaccaacgataacggaagtgagatggttctttgagcaagaatagagaaa  
gagggctacccttccactcgttggagcatgagaagtaactgtgtgacagattgaaagttatcatcggagatctcattaataccttttttctaaa

ttatcttcagagccgcttctaacttgatatattaggctcttgttcagaagtctctgaactctctgatcgattgccatcatcttctgaaggatctgtgt  
tctcttctgtacctccatccgtatcatcatattggccatcttcttccgagctgtccgaaaaaccaccatcggagcgtattgtattcatggccaagg  
tgcttctgagaagcatcggatacattataccattagcggccatgttaagaaggggtgaatgttttccaaattgtaattgataattgaaaggtgg  
tatcacgagaaataaacgaagcgaacacatagcagcatggagagtggtatttggatggcattagggaaaacgacagcagtgaggacttttttct  
acggaaaacatctctgagacgggtataatgatactcgaaccagccaaatgctagaattaagcatatgtgttccgagagatacaacct  
tccatgtaaaaaaatgtcttgaagagcagccataatcgctatgagatggatcagagggaagggtttaaagatgcaatgaaaatcat  
gatttcgctgttggtagcaaaaagcataccagacaagctccaggatcacctgcagaagaggctatggatacttccgagaagctgaagtgacc  
gcagagccttgggttgcgcatgttctaattggcggcaaatggaagcatgaggttgcgtattaacatctttattacggacagaaggtgagcgtacg  
gtagcttctgttctgattcaacatccacgtcttcagaaactattgatgtttcatgacctgctacagcgtttccattatctctggcagatctctttcga  
agtttttagtttaattcaccttcccaaaaaggaacatcatctttactacttttcttccagaatctgtcctagcatgcccgttatcgttcaattta  
gaatcatcttccgaaaatttctgtgttactaccatcgccggcttctgtatttctaatacgaatattatgttttgggtgaacagcttcattgaccaca  
ccgctcaatcgggtcactgcagaattaagaaagctagaaaattggctcttcttcatcgggtgctgaaaataaacaatctatttcttgaacaatg  
gaactctcatgaatcaggtgagattcgtatgtagactgaaaaagcaacttaattccggcttctgttccgggaacgagtgctcgatatatgaaatg  
gagagaaactaaatatgcaagtatattctgacaatatttctgtaataccagattgtgacgttcaaaaaatgattcaacggctaattatagaaa  
aatgatgacatacagtttcaaaactcttactagctgtctgttgccttcaatgaaaaagttaaacagattctctctgtataaacggccttcaa  
atataagccttagcacttttctacaatcttctgtgaatgggtgattctaattttacatagcacaagtgaatcgatttaattgcttattatagcgac  
gccacgcaaaaaagggataacgggtgatgacgacctttataaaaagatgtatcgaagcgaaaaagttgatcgaatcgatcatagaactcg  
gtaaaggaagtaataaacaagcaatagaaatgccatttcatgaaggaaggaatcgggtccattgtagaccactcgggaagagtgtagcg  
ttgacatcgttgattataatgattctattgagaggttactttgggtcgcaaaagcattcggaaattgaattacggatcaaaagcgtataggcaact  
gacaatcaattttatgcatgctgtaactaaagctcgtagctggactgttctgacattctaataagcgggggtcgtatccaccaatctgtaggg  
acttactgtcgcgatcggcgtaaaactagcacaatgaaatgtacagcgtcctcgagttggggcaaaaaagtcacgggtgctgtaattggcgaatt  
agagcctgaacttctttgaatttggactcatctgggcatgttctgacctgtcgtatcttttgcaggattcaacgttaactgccagcgt  
tctaaatctcccagagcttctgttggataactaaagcaacttttctatcttccacaggtccaacctatcattgagttagagacatcgcg  
tctgcaaatattacggataaccatacgtatgaagttgaatataatcttctaattgtatgtttgacttcttctgactgtgacaagcatactatccc  
atatttacgactacttgaatctcaggtggatagataccgcttgaaaaaggaatagaaatcaccgctattctatgaacgttaacattgctgct  
ttcattttcataacattaccaaaaaattactaattactttatagatgacctttaaaggagagattgatcgaacaggtgctcggccataatttgtt  
gttttgggttacttgggaataatgatcctcacctttataggcttgggtgcatacaaaattgaaaattccttataaaaagcgtttttattttttt  
gtttatgatatttaagtgttttttcttcttctactaacaactggctaaatctgattcttattatgttactacaaaatataattacggactcatc  
agtcgagattatattgtactacaccagaaaaagtcacttttatttagctgtatgctgtcagaaaggaacacagagaatcctgagg  
caattgagataatgtttcactgtggattccaaaagcgtgaagcaactcattatgtatacggaaaccttctcgatcatcattaatagaat  
accttagcttcatcaaggacttctctgtctgcagtaacgtgaaaatatacatgtataaatctgaatataatgttagttaatttgggaagagaaaag  
cgccataattcactcacctttcgaaatggacaatggcttattgctttcttataccaagaatgcaatcatttgccttgaatcagagttcgagaaag  
ctgtgtgtaggtaaatctccaaaactaaaataaaatcgagctcctgtatataaaatctctatccagtgatcttcttctgttagagacatc  
ttggccttccataatgaaaacatataagagataaatagcctttctgtataaatgaaatgagttccaatgcttattttactcggaaactgcaat  
tgatgcttagattcgaacatgaaaatatttccagagaaataatatttaggaaacagctcaacagcttttctaaaattggcctcatctcaata  
cgctgaaaattttatgatccttgcgtaattgtaggcaatcgcaaggccaactgaaaaaagtattctaggtcttctctgtaacaacgtccagact  
ctccagtttaatacgcacttctcaatggtataatgaatgggctcctctgtaaaaaatgaaagcattaataataaatgaaacgtttactacc  
ttcttctatctgctccttcaaacagcatagtggttcttcaagtaaccagcttctgtctgatgactcacaagactgatcagcatgaaataaa  
tgcaacaatacattccaaaatcatttctgctattagaaaagacctttgcatgccaattttatgaagccatacattcttaaactcagtaaactt  
cgaagagtgataagataggcagttttgtatatttttcacacagcgataattttcattcataaattcagtttgggcaacaattccatacaaaa  
atcgaattctcacttttttaaaattctttatcgtatagctgcttagcaatagcatccgttcttgatacatgatatacacaactaaactttcat  
attcttcttcaaaatctagttgacataactttgtaaaacagttatatacaaccagcaaagttatcatccacctttataaaaattgatgc  
aaaactgtaatacaacgacgaatttctatttcagaaaaacttttaataaccattagaaaataatcgggtaaatcagtcgagcagggaaaatagat  
atcaaaaatcctggagatagcttttagaggaagaacaaaataattgacatttttaggatcctttcgaatgttcaacaagcgaatctcaat  
gtcaagacttgatgaaaacatggatctgaaacaaagaaatggctcattttgtcctggtggaagaattgggatccatagatgttaagaaaac  
agtattttatagcaagaagtctttggcgtaaaaaatcgacataaaagtctttgacatctcaaaaaataacattcgaagagatcgctcttgc  
attcaactccgagcaggtctcctcagccaagcttttcttgaacctttttcattctcggctcattgcaaaaatgaatcgtaaatcgttatt  
ggcgattgagattcatcacaccttgggttaaaggtgatgatacactggaactattctcaaccaaggcactggctctcaaaattcggcgat



cagaatcccagaattttgacagctccagttttatataatctaaatctttgttgtaagccttgatggaagaaaatagtaatttccatattcacctgc  
gtaatcgcataagccaactcaaaatcccgaatcccgcgcaaaaaagcataccctaagcagaacatagatagcagttttctcaagttgtgtat  
ttcacattccaatgactcatctttttagaagttcatcaacctattgtttattatagccaggcattcagaaaagatttgtaaacacgaatcgacag  
aaaacgaatgtacgttagatataagataattgatataatagaatccacaaattttcgataaacatcagaaaagcaaacgctcccaatggttt  
tgtgtagtttggagctccattcaagagatcccagttaaaatactccaagaccaattgctcgacatcaatcgaactgaagtcaatagagaaaata  
gctttctctaaaattgatattgaatgtcacgtaatgaatgctgtaggctctttctcacgaatagacatggttggtcgagcatattctgaaggagc  
aaatcttttgcaacgaacatagacgaagccataatgttgggtcaatccatcttttctaagctcttctgtaccttgacaatctcagctgaataact  
ttaacattttctgaagttggtgacgtgtgactcgtcgtcagttacattggcaaaacttcaggaaaaggttgataatctttcacattgaaaatgt  
gtaagcgaagaagaagcattgactgttcttttactctagctactgggtacacgtgagatccttttaataaattccttggctcctcttatgaac  
tatttctttctcaggatggctcctattattacgttagatttctgggtatatttggaaatagaatattatgaatgccaccgtaaaagaaaacttct  
atctcccttgatcgtattttacattatacaactgttgcgcgatcagtgagcggtagtgctgttctgacttagaatggtttatttctttcattgt  
atccacgtcctctttttccctatgcttatctttttcacgctttattggttgaagcttcaaaactgggtacagggacatcttcttggcaacatatta  
aacctataaccagaatatacttataaaaaactgcaaatatattcaaaaaattcattttcttagggaaacctacaagtaagcaagtgctg  
tgtcttgggtgaagatttgagatagcgtgaagaatctcctaaaaaacaattttgggtatttctcattgattcttgatattcgttctactaagtc  
taaactttacgttcatttggtattttatctttgactagtgattcacaacttttctgataataaattgctttctatactataatcaaaaagcattagatc  
gaacaaacagtttgccttagctgtcttgaatatcttttaaatgaagcaatataatatttagtctgttgatgcttaaccaggaagatgctcctat  
tgacaagcgcgaccttgaagcggtagcactaattaatcaagttcatggttaattcatcgttttcttttcagtttgaaaatcccgcta  
ccgattagaatctgccttgagttggtggaccaagaaaacaatgccctaattgaacagtggtcctccgctaattgattttttcatcaggtgaagtt  
ttctcttaactctgaaattaaccgataaataagttgaggcaaccacagaagctgcttggatgctttattgtgacaaaaactgtggacttggcatct  
atgagaaccaagcaactcatataggaaaacaaaattcaatattgaattgtatatacaggcagattaacaatttttgagcaaaaatagttccaa  
cgccgtcagctcacaatcaacaatcatgaactcgcgatggtcaaggttaggaaagattgcttggaaagtatacaagcaggccagcttctattaatt  
aatgtatgtggcattctgattatcctttgctaataactgaacaggggtggcctttgtctttcggaaaaaggaaagacaagtcaaaagaggga  
aaagctacagcgagctcaaaatagctgactcagcctatactggtaagaatttctgattcttcagttggtgattaaccggatagctcaatcaagat  
aatatttctgccaggaaaacaatacccaaaaaatgttttacagattcccgtctactcgaagcatcaaccaatcgatctttgagtttatta  
caaacccggaaagttattctcaaaccttgagaactgtttatgtcagtttcttttaagaaggaaaagcggcctaattgaagattcattagg  
agcgtctttactaggtatgctttatgttcttttgggtactaattgaatataagagagtaaaacgcctccatcggtagcaagtaaatctgg  
ggaagtacgaaacgttcaactcgttatggacatgactttagatctttacgaagtaagtagtcgattatttcttttaacaaaataggatattat  
acgaaactttgaaattacggatagcattataccaacgcgacgaccagtagagactccgctagtagtaatacatggtacagttattttggaaag  
gaaagggatgtttattagttgtaaattgaattattttattagcccataaaatttataaattgtaagcaagcgtgcttaatgataagataa  
atataatcataaccagatccatagtaaaaaaaaaaaaaaaaaaaccaaaacaaaagggaataggagtaaaagcaaatgactaataaaat  
agggtccaaaggtatataccaataaaacaattataatctgtgggtcggagaagttcttttgtgctaaaaccatttttaagagaataataaga  
atgacaaagtcaagttctgttctgtcctgacgtctttgtcggtcacgaacacggctttttcttcttctggcgcctgtaagaccctttctggt  
catcaatgtaattttcgtcttcttcttattgtcggattcagaatcactcatagctataccagcaacataaccagaataatccatgaaattacga  
agaaaagagcttttcgaaagtaaacaggaatgctgaccgtaagatgtacttaagactttgggctcgtagaatcttttccaggtgcaagctga  
actgtcagcttgcctattctatagaagaccttaagttaccagaagatcgaggattttcaattgttgaaggacgttccggaatgttgggtgaacac  
ttttctatgcttttagcagatacttttagaggattcagtggaaggtcacgaagaatagaaaagtaaatgaatcgatcaggaataatcattatct  
atggatctttccatttcttctcagaatgcgtgtctgtaatacgcctatacaaaagctgccagagcttggccagctcccatctgtacgtctactg  
gcagctccaattgctcagcaagtgctcagcagagctgacgaattcactgtaggatggtatgccggttagcaagagtcgaagggattgaca  
agcaatccaaccagctcttcttctctgattaaccactgcacatcagactcgatgatacttgaagttgataacaaaagtcgataatca  
ggctcagagtcgaagaggactgtcaaaagcgaataagagagcatagcttcacacttactgctgttactgggcatcatttacgagagcattgaa  
acgaccctctgtagcagtcgaagtcctctactgaaaactgaagcacaacataaagcacacaacagtcctcattgtgataaataactcagcat  
cagaacgtgaagagtggaagagcttaagagtatttctccagaggaccgatttttcggcaactcgtttacataatcgagtgacaaagttgta  
tagtttctcaaatgtcctcccgtcttttgaccaactttctcacttcaataatcatcaacaatgcttccgaattgctgattccatgttctggatt  
ctccacatattcaaatcttgaagacctacttaactgatcaacagaactgctcaggataactaatagatccatcgtttcatcttcaaacct  
gtgattatctttataccatattataaacactatggctttaggcagaatttaccatgcagagaaatacatatacatatataatgatagata  
tatattagttcaactatgacatagtccttcggttgcgttctgtcattaaaggaattagtgatgcttatcgaacagttgagagctaagaacag  
aaaaaaaagcttctcaaaataggaatgatctattcggaaaagattcattaaaaatctctcaagattcctctatgtatttactgaatt  
gtcgtacatgaaccataatcagccgacgttttaagaatgaacctgcatattctgcgccaccagccttgacatctcattgaaactttcaaaagtct

cctcatagttttgataaaacatcctgtcaaaaccagaaagacgtagagaagaatccattgaaatcagatatcatagttcgttataagataggt  
agcaactactctataatgatgtaaacaggttagcataaataaaggaatttgatctatataaaaagaagctataaagtaaaaaagaaaa  
atagttgacattcaaaaaaaaaaataatgaccattgggaacaggaaatgcttgatcttcaactcttctgcatgtgcattattgaacaatatca  
ggtgggtataattaatattagcaatataggaaagtaatttttagccttaatttcaacctgatcctcttagtaacgagatggattatcttctttc  
aatcttctttgttccatttctgatgtttgggtatggtagttttgggcttctattgagcaattttactatttttttttttaaatagtaaaatc  
aagaaaattgatagaagactcttactgtttagttttctgtaaacattcaaaaagttgctagtctggctttgtaaagagatgttcttcttttt  
attttgagttgtttccatttcagcccttattcttcttaaccgaatagtagtaaaaaaatcttccttaaatattctgcatatgtccaaccgcg  
aatcacttctgctcagtaaaacctcacatttcaagaggaaactccaactcatagtatatagacttcaaactggctagcaaaattgaaatgataa  
agcggctactgtagacacaactcaaaaatagttacactctataaatgcttaactagtcgatactggacagggaaactggataatgtatgtggcg  
cgaattcttctctcagtcctcgccttcaagagttaaagcaaaactgcaaaaacttgcactcaagatctcgcctcaatggcccaaaaatccat  
agcatgtatctattcgtgggtgatttcttctatcgaaggatgaacattacgaatccataatgctttgacaacactgcaaatgtttctctgctatg  
tccaatcagaagcttccggatgtgaatttactgtatattgttactgggaaacattgattctatcgatactcagttttactgtttattcgaactgt  
gtgatgaatcaaaacctctgacaatgctcagtcatacatgactcttcttcttcttctgtttccttgctactctgtacaacctctgcttcatatct  
catattttgacagctatgatgttttcaactttggtcactgcatccttgcataaaaagccggtttgaagtgtctatatgcaactggattactaa  
gtgcttgtaaaaactgcaatacattgaggttcatctgtccaaaatctgaagaaccttcttgaggctgttttaaagtattctatcg  
ctcaactcattgcttaagagatgaatacgttctataaaaactgatgattctctgtttcttcttttttagcttcttactattcggcttcaactcga  
atcctgatgtaaaaacagagcagcaatttgcacacctgataaacgcttagtcattgttttaactatttcaactttgcacttgcaaaaacg  
ttttgcaaatctttttagttcaagaaaaatgacctgactctccttcaactctgcttctactagcttctacataaatgtccatcagaggcaa  
tccaaacgcgctatcatttctatgctttctcattcttcttcaaatagatgatccattactctgctttgctgggtgcaagcaattcag  
atgtgcgctacgaatgtgtttacagagatatctttcccttcttaccagcgaaacatatttccatgggatatcttttagatatatgttgccttg  
gattcaacataatgcaaaactgaaaattagtagtccaatctatattgtactttagcttctgcataaaactttcgcttttttagcgaaaaactgat  
acgattggaatatcattggaaggaactttggagatttctatttcttcttagaattctgtaatacgttataaactcggaatttccaacaacgcacc  
cctaattgtagagcctttatnaattgtctgctatacagtcgaaaatgtggacgctttgttcagaactgaggaaatgggtggatctgttatata  
aattaattcgaatgacagatttcaactcattcttcaaaaggaagcctcaaaaacaggcgcgagctgattaccttctggagtgatcagtta  
ttgactcaaaaactctgaatcaccagatagttctccagaggaaactaatggttataaaaaggaatattgaaatcaattcccgtggcagaacc  
acaggttcttcaaatatacctccttaagggaatctaatatcgtttattcataaacgagtcagtagagatatggctgaaactctacgaaacgtcc  
aaattcttagttagctatgtaattaatgacttatgactgttcaaaaatattggctttagaatacaaaaacagagatatttgcctcatgcatctt  
aacctttttccatataatacaataactactctactcattaataggttagctactatttttagctttattcagtaaaaaacgattcaaaactatt  
ttacctatataaatgtaccagagaatgaaagagagttaaaactttaaaggatacaaacgaaactatactagttctttataaataatgaaag  
cagaaagcagatataactgttctggtgaaaagtgtcagtagaccggtgaaagtaagtaagcaaatcaagtcataaggatagactatgaaagccttc  
atcaggtatgtggacaatgcaaaaaacaaaatttctcaaaaaagccagcccaactctcctcacaactaactggaaggatataaaaaga  
gaaccgataaaaatcatttaaaggcgtttattcatctttccctttaaactctccgaccacggaaaccaccacgaggaggaccaccgcccac  
ggaagccgctcagaccaccacggaaaccaccgagggaccaccaccaggaagccgcccagccaccaccaggaaccacctcg  
accagcagcagcagcttaggtctttagcagcaggaccttaggcttgggcaagaagcgctccaaggaagaagcttatcactccaatgaata  
ctttatcgcaactttgaaggagctagaacaatgccttctgaaggcttacagtgaaactgattcatgggacccaaaatctcgtcaatttt  
gccgattgagactaaagcttcttagcaaaagtcttctttttgtattatnaaaagaatgaaactcctgttctccaagtaaataggagcattga  
agtagggaattttagggttgtagattgacaaaccatatctcctcacaatcatgcacaaaactccaatctctaattttcaactattagtttcc  
tatactagaaaagagaagaccaacaactcataaaacgatcgtgctcattattgagcttcttacctaaaactgatcaggaggaccagca  
ggggcaaaaaggacgatccaggacgtccacctctgtaccacctccgaccgccagaaaactcattctcaataacttaattaggctcgtgagg  
tgataaaaccgttacctcaaatataaaggagttttgtaaaatcgaaaatttactgtcacgtagaattcgggtgtagcaaaattataacgaactc  
gttgaatagtagtaaatattataactcgtcataaatagcgttattagaaattaacttagttaggaaggcagcaaaaacgagttatcagagca  
aatatcactgttgaactggggagagcaaatgcttctgtgtttaaaccgcatatacaaaaaggtaagtaagctgaaaaggaaaaaaagga  
gacattcatgaagatgaagtggttgtttcggttcaacacagtcctcggtacagcatatacaggtccgtggaaaggaattgaaatctgtagacc  
caagtttaactgtagatcacgtataataggttttattaccgtattatttagtacacgagccgagcttagcgcaaatcaaattttaggttctcag  
gaatnaatacagatagaaaatgaaaatnaacctggttctagtcttaagtagaaaactaccccagataactgtctcattgattgattgtccac  
cgaaggtcattcctgaaagttcacattgagtttcatcgttcgaatnaaggatgagtcagctactgttcaacaagtacagaaggccttggaca  
ggtctcttagaagttccatacattcaacatcgtgttgaacttttgagaatacaaaaaagagttgaggaggagattgccaacaagcccagag  
aggaaattgacgttaccttctgatggaaaggtgtcaaaagctactagttgggaaaccactccttgcattgctacctcgatttccaagggtct

tgctgagcgtaccgtgattgctaaggtggatgacaagctatgggattgaccgcctttgaaactcttgactttgaagcttttagactttgaag  
atccccgaaggaaaacagagtctttggcattccagtgccacgctcttggtgaagctctgagttattctatggctgccacttgtgttggtcctccta  
cggatgatggcttctttacgaaatggctatcgagaatgagcgtgtttacctcgaagactacaagagcctcgaaaacttagccaagcaagca  
atcaaaacaaaagcagccgtttgaacggtttggcctttctaaggaagactccttgagatgtagccacaacaaatataagcaacagattataca  
aaacaagattcccgatggactactactgtctatcgctgtggccctctattgacttatgtactggctcctcacgctcctcataccggccgtgtaa  
atcttttgcgctcatgaaaaactctccttatttttgggtgatgctaaaaacgattcccttcaacgtatttatgggttagtttccctgacaacaag  
caaatgcaggagtataaagccttttgaagaagctgccaacgtgatcaccgtaaaattggccgcaacaagaacttttcttcaacgaagtt  
tctcctggtagttgcttcttttgcctcatggtagctgatttacaacactttacaaaactggatgctggaacaatattccagcgcggttaccaga  
agtcacaccccataatgtacaatgtaaacatttgaaaaactctggccactggaataactattctgaaaacatgttttctttgacgttgaaaag  
gagaagtttgctttgaaacctatgaattgtcctggtagctgtcattttcaagaaccgcatgtagttaccgtgacctcctggcgcggtgccga  
ctttgggttttgcatagaaaacagttttctgggtcccttagcggctcaccgctgctcgtttccagcaagatgatgctcatatctttgagacc  
cgaccaagtgagaagcgagattgaaggatgctttgactcttgagcacgctctacggatctttggttttactttccattagaattgtctactagac  
cagaagagaagttccttggtagctcgtacttgggatcgtgctgagactcagttgaaggctgctttggatgcttctggttataattgggagttaaa  
tgctggtaggtgctttctatggctctaaaatcgatcaccgtattcgatgctttaaaccgacaacatcaatgtgccactattcaactcgattcc  
aacttctgagcaattccaacttgaattccatgctcctgttaatgctgaagaagccaaggaaccgaaataacaatagctatatccgcccgtca  
tggttcatcgtgccatccttggcagtttggagcgtatgattgccattctaccgaacatttcgccgtaagtggccgttttgggtgtcctcgtcaag  
tttgactgttccagtttctgttctgctgctatacttatgagagaaagtcaatcgtgcttagtaagcgtggtctctacgctgacgttgactgtcag  
acaacactttacctaaaaggtagctaccgcacaactttctcaatacaacttcatctttgctgttgggtccgaagaagaaaaatccgagagtgta  
atgttcgtaaccgtgatgatcctaagaagcaagcaagggtaggttattccatgaaggacattctgaaaagtactcaagcttaaggagtc  
aaatctcgcgcaacgacttgaattcgagccttatcaacttaggtccatttttgggaattagggttatttactataatgcaacattcatttttct  
tttcaatgaaaacaaacttcgatataggtccttggattctacaacagaaggtccagcactgctataaagtagataagcaaaactgtatgtt  
agtttattacttagtaggaccatgtgattagcagagatgactctcaatagctttaaacaattgccaatcattacgattaatgttaacgttactttct  
acgtatataagtagatgtcttgaatgtgataaatattgaatgggtgctactacctaccatctgacttactcttaccgacttggtaggatcatt  
gattccaatgggtaatttaccattgtacgaagagtagatgaattaacatataattagataatttaatagctcatggtttgactcataaattatacga  
aaacgaaatctactgcctatgagttggagcgtatgttatttattcattacatgaaatccagttcattataggaatttaccatgaagaagaat  
attttttagctaactgaatgcttattagtgctcgcgaataacttagagaaaggtgaaacggacaaagtgcaggaagtaatcaatgagcttgc  
agatgactttatttaccgcgacaaaaggatccaatgctgttttggaggacttataggcttgcgcagttgctattgccctaggctcggtaagtt  
tatatactttcaattcgtcattctatgtcttaacgcgaaatagaaaattgatataatggaatcaattataatgccagtgctatattgctttaa  
tgattccgattccaaaatccgttattatgcatgtgaaagcatgtataatattaggcaagtggttaaaggagaaggtttcgggttctttaaacttattgt  
ttgacgtcttgcaaaactatttgcacacagaaataactgtaaaaaatggagctgaattgttggatagactagcaagacatcgtcatccagc  
aagctccacatatatgtctagttagaaaacttgaaacatttaaagacaaaactgctacttctctatgcaagatgttccagcttctgtcttgaa  
tcttccggatgcaaacgttttgcctcgcgaagctcgttctttgctatccgaaaggatatatgtaataaacccaataaccagaatgttttggttct  
tggattcgattacttgacagattccagacctgaattcatttgcacttgccttatcttttagatgggcttatgaattattgagtgatcctaataaaa  
gtattcgaatcgttacgagtaactgtttatacgaactttttagagaaaattcaagaatagccaaggtgaagtaccatccttcaacgagacgaag  
aaagcgaacctgacttttcaactcgatgattcgtcagtcacatcggattcagaaatgcaggagatttcagagtagcttgagggttctctgaaag  
acggatctttatattagaagcacatattcaaatcgactgcaaaaaactattagaataattgtcaatcatctgggttcttctgtaccttattcaa  
gaaaaggcattgaagtggtctatgagttatttaccgaaagatgctcctgtttgatttcaaggattagaaaacttttgcctttaatg  
tctaaaggagagaatattcgtcagactgccaaggagcttagtcaaaactggctcattctagttagtaaggtaggatattgaaatattcagctt  
gataccagtcaaaatgataacagtttaactgttattttcacacattgatagaggttttcaaaaacttcttccaatgacaacgaagaactcgtc  
tatgctccttgaatggattctactactacaagaagggcggtggaaaacttatcagatgcatgatacattttcaaacgttttgcgactgtg  
tcagacctagcagcttagctgtttctgaattttgaacttctggcttatattgccatttccacaaaagcgaaaatttgggttcttctgaagtat  
cttctacagatgttttgaagataggaagttctgaattctcaggttaatttatttcccaactatgtaacacattgaaggggaacgagttta  
tactgctttgccagattctagaagtagaagaggtacgtcaattccattaattattatgctaatctatagaatttgaattggcaagcactatggc  
gaagtttgaataacaactattttacagctcctgaattttgaccttcgaaaaactgaagcagagctcattaaaggtagttatcactataatt  
ggaaggttcaacaaatttaagctacaaaatattttcaaacctttatcgtgcatgggtgcataattctatcgcggttttgcgttctttgt  
cgcagaattacgaacacgcccaacctctatctgtattgtaagtattccaaggctagctataaacacggaacatcactaatcccaatagtgctg  
aaatagagtttaattgtgatgttgatccaattggacaaattggtacaactattgagtcgctgtgttcacatgtatgtgaatagagtggttaa  
gagttactaactagttagacatgctgctcagctgctggagcctgagaagtaccgtaccttataaagccttgacggaatataatgctgttacc

acaatcttccgatttaggactttacgagaccgactccaatgtactacgggtgcaaaaagcaatgtttactaccaaacgaacgcatcaatagatc  
aagaaggatgatccatactggtcagatttgttggaaaggctgctacagtcaactttctcatcaaaataattatcgagaaccgatacgggcaa  
ccaaattagctttagcaggagcgttgccatcgattccgactgccacaacgatctcgacgactacgtcagcctcaggaataacgactactgctagta  
attccaagatttaattgcaaactcggttccgcaagctgtgacgatccaccaggaactcgaagaatcgaaatgatcaacagaattttgggt  
ataaaacatgctttcttaagatgattatttaccatactatgattaattatggaacgcttagattatatttaaatgaaactgaaatgagcagcgcagt  
cactgtattatttcttgcgaaaatccgtaataggtatgacgtgtaactagaaaagtaagcggattaaagaagaatgggagacaaaacatgaa  
taacaaaagtgaacgaaaaaggtaatgatatagggaaacgatagaattagggttgaacaaaagaatgtgggtgtatctttgcgcatgta  
ataagtattgtcgtaccaattcatcatccattttcgatagcataggaagacactgaaaccagcaccacctaataccatggcctttggctctg  
atcgtctagctaaaatgctaccggtaaaaaaacggcgatgggtgggtttagatgtcagtttttagcacggaagcttcgatactgcaactagag  
ccagcgaataaagaccaaggacacccaaaacttttagctgacgagtaagagcgggagcccatatcttcaattgaatacgtagctgttcacgga  
atttctttcatagatttgggggtccatactttgcataccagagaggacatgaaagaccaaatataaccacccaaaccaaaccatacctccag  
cagcgatactttgaatacacagctttcttcataaatgtaacgattttagattgtagcatcattgacttttctctggtgctcatctcatcagaggcag  
catttggcttgataaagaagaataaggattatcaggattgtcatgtttaagtagcaaacctttctgctactataagtaaaggtcggagagatc  
ttccaatcaagagatcagtgagggtatagacaaaatgaaatataaaaagagcaatctaaatcttgaagactttaaggaaagtcgtaacttt  
aagtctaggaattttcagctgaacttttgcgactcgaataccaaaacactcagataaaaagggttacctatcacgaattacaagactaatgtga  
ttacaagtctcaaaaagataaattgaaagaatccctttttattgccaagcagataaacttttgggtggaatacagagaaaggattagaaaag  
gcagtccatatgttcgaagtagatcaacaccaaatttggcagccaagaactcgaactttccaacaacaaaagtagattataaacgtaaagc  
aaaatgtctgtcgaatctcaaccgtcgaacaagtttctgaacttccgctggttctaccaccgtgtccatgccgaaaaggccaaaagttgatcc  
aaaagttgggtcttaagcgtgtgaaggcatcactcgtgtgtatgcgccccctaagaatatcctgttgatcgtcaacgaccctatcgtctaca  
gagcagcaacaacgcttctgctcctgtaagatcaccgtcgaagacatggctgctcaagctcgtgccttcagcgagaacccaaaagaagtcg  
gtgctgagggtgctgagggtgctgctaccgaagagcctgctcctgccaaggaagagcccctaagattgaggaagccgaagaaccggtgacg  
aaaccggtgtgacgccaaggatgtcgaattggtcgtggctcaagccaatgtcaaccgtgccaaggcgttaagcttgaagaaaacaacgt  
aagtagcaataaagtcataaagggaagagtggaatgtcgaatgaaaggtctgaaactctcaaaccttctgctccttctttgaaaat  
cttcaacgtagttgatttctttccaataactaaccatgctttgacagcagatgctgtaacgctatcatgtcttactatgtaaaactgcaatgt  
gaaaattgtgtagattttgtattcatggctcctgcatgaaaaaataattattatgtttatgtcccgtaaaagaacattgtagagaacgag  
gtagacggtaggaaatctgtataggagcttgcactaagttcactctagagaacacgggtggacaatatgaaaactaatagcaaaccttctta  
agaaccttggtaattgtcataaagggaaccctagtcagccaccatccattgatccatgaagtcgtctatgtattcaatctaaatttatacctat  
tcataaagagtgaatagttttcatacaatcggtatcataatttctgtgcttagagcaataataaaaaagggaatattgaatatgaagtcagga  
gagttgttaggaatcttagctagttaccaaagagcgaattataaaaccggttcattcatgacaaagaaaagaaataaatcaaaaataatcat  
acatcaaggatcgacagagtgaataaggaaactgtccagtcattcaccgaggaagcttacttgagctcaagtagtagatataaacggagaa  
acaataagggaagaaagcaacctcataataaaatacataaaaaggatttgggaagcagcaatgaaaagagaaaatagatccgtcagctcc  
gttgatgggaagttatggtggcattaatagccatagtagattcgggcagcagccatatttaacgagcgtaaaaggaaaaaggccgtagctaa  
gtacatgtaaagaataaaatcttgaagccagggcatattagctatccggctgagggaggttaatatgaggccgacaaactgtaccactga  
aagccaagagatccaggacgtgactctgatttgaatatttaataaataacatccaaggcagtagccaaaaactcgaacaagacgataccac  
atgcttctagcagcgtaaacccaaaagctcaggttgaatttatcctgcaaacctgcaagcgcaaatcaaaagaagatgcgtaacaaatgc  
cattaagggaatgtacatgtctggagagttcaggtcttctcctggagcacagatccttcagcgtaccattcatttctgaccgttctagcttacgag  
ccaagacctgcccggcaggggaaaatgatgagcaacagtttgcctacaacatacaggttgggtactgagaagtagtgaggagtcgggtggt  
ggagagccactttccgaaattctgttccatactcatggccagcgttactgactttcgacctaactgaaatcccatttgcgtagccgaattg  
ggtaaataggacgcagttgaaggcatgccatgccagcagccatgttgggattgtcgtatggagaggacatggaggctcctgaaggaaatccag  
gttgcggctcgtaccgactacgtcgtcatattgggactagggagggcgtgagtcggttggagatgatacagtttggaggcatttgaagaggt  
ctctgctccttgggtacgtataatggggaaaggtcaaggctggactcgtgaagttcagagagaaaaagagagcaatatacagaaaagat  
gggaaaaacagaattaaacttaataagaaatataagaaataaaataaaatgtaaaatgtataccaaaatcaagaagaacaagacact  
ttccgaaattttggcatctgaaacgaaccagaatgccagaacaaaggaaagggtggaagaaccgctgcggaaaaaatg  
agaacgagaatgaaaagcgtgaattgacctacggcaggaaggtcagatttacgctcaagttaccagaatgcttggtaacggtcggattgaggc  
agcttcttcgacggtgtgaagccttaggtcacattcgtgtaaatgaggaagaaggttggattaaccaaggtgacatttttattgtctctc  
gtgaattccaagacgagaaaggtgatgtgatcttgaatacaccgctgatgaagctcgtactcttaagaaccaaggcagttgccgaaactgc  
caagattaatgagaccgactttggttgaaggagaagacgatcttgaattgatgtgatctattaaattcactgaaaaaattttat  
ggtgcacttggagatgtggtgaaataaagacgatggactaaatttataaaaatgcttgtttttatttcttccatgttttctttggtgatgtggtt

cttggttttcttttattatttactagaaaaaaagtaaaaatccctcctatgaccgaaattatgtctccctcttttccggtttggtctccggtatata  
atggtatttaacaagattgtactcggatttccgtccatgattttcaattaactattgtcttgttaatttatcttgggtttctggtctggctcatgaaa  
ataaaatttttaacaaaaaatgtcgttatgtagatgcatggatcatagtttagcagggtatggtagctttttcttttcttttaagcaaaactgt  
attttgattaaagtacaattgtaccaaagattaatactgaacgttgttaaattgtagacgagcaatttctcctcaagatgagtttgaagaagaga  
aaagaatcaaattaccgcttgggttcttttaacaaacaaacaaaaaatatgcttttctatgcgacaacatattgccaagagataccaaaa  
atcactaaaatgggtatataggcggtttcaaatgaagaatataacagtagagaccgatttttgagttaaaaaaagataaatgaagatgtaa  
gagaatgaaaataaggctataagacaattagcatgttcatgagatttgggtatgattacagataaggcggctgtaacttttcaggttcaattgtca  
aagtggcgatgattaaacgccatttgaattcgttcaacttcaaatccttagaatccctatagaacttaaatcgtagccatcgtaaaaatcat  
tcccacagtcaataaaaggcgtggggattcttcaaacggttggcaagttcatacctaaatgctagcaattatggcaccacaaacccaatc  
ccagcgtgaccgcagaaagcttaacccaaggagcataagggaaattctgttcgcatcacaataatattacagatttctctgtacttccgatatt  
gccctaaatattctgtttgtgcacaatttcttacttctgttgaatatgtttcaagcaataactctatttcatcatgtttatcatgatcttaggtt  
gccggttcaaggcgtctgtcaagtacatgcttcaaatcttctgtcttcttagcagttcgtctaaaacatcacgaatcaatgtagctttttca  
gaaatccagaaagacgttgaagagatcagaagggtcctaagccgatcttgattaatatcgagttcaaatcgggtaaaagatcagagacaag  
attctcagaacacgcaattcagaatccagagtattcacaacgcttataatattgtttcctaaagccatatttcatatggcagaaattcaaatca  
ctggaggattgcttcaatctccttgcagttcatataaaattgagattgcaaatgggagtgctggcttccatatacatcaaaagtaatacggaa  
ctgccttgattaaggctcgaaggtcgaagagattaacaaaattgaccctcagctacaaggatcacggacgatagagttgatactagtggtt  
agcttctgtaaatcacgaggtagcaatccattttgttgcacaaatccatttttgaatctccacagattactcttacttccctgaaagtcaat  
tcagtacaattataagtaagcgggtttttgaggcacttctgatgaaaccattctgtccggcttccgaggtcacgatggctgcttttcttttga  
aggtagcaagggaattgtcaagttgtcttgggggaagaagccgagaatggaatcggacaatggatgaacgaaacggatgagcaaacagttgt  
ggtttgagggtaacgagccgaaaaacctgaaattcctataggaatagcattggaagtagtccgaatgttacagctgaaaagggtaaacc  
acaaactgaggattgatcaaaaaatccttattcaacgacgaaaatgaacttctagcttagaaaggaaatctttagaatttccctttaaactg  
aagtaagaagttatthaagaaggcgaacccgcaatttcaagatggtagatttcaaaccttcaagcttgaatttgcactgtggttcacaatt  
gtcgttgatttcttcttcttcttattgacagtgaaaaataactggtagttatcctaatcctctaatcgagcacaataacgacgacgattgtaa  
agtattgcaagtagtagttaggaatggtacagaatacaatcgacagcagcaaaaggccgatctctataaagaatgtatacttaggattctaa  
agaatataaattatctataaaaggatgaaagacgaaaggaatccgtgagactttaggtaaaaatgaaccagacacccaaacaacggtt  
tttcttcttcttcttcttattatacaaaaagaatgaattataagatttttaataatcgcaatgcaggaagtagtgcaactgttgagtcact  
gaactaatgtgaagcaaggaaaaactctcggaatgccagccaagttattcagcttacttcatataaacattatgtccttgaatttcaatat  
ttcattattatgcttcatgttcatatcttgagacagccttacaatatgcgaacgaacacctttcacactttgatgatctttgttcttactgcaa  
caactgttgaacataaatgcacaaagttatcctaagctataaccttttctacctttttatttcatagttgtcatgattgtacatttgcgatcccag  
tgaagtttggtaagcactcgttaagaacttgattgcttttctcgcagcccttttatgtatcatcaacagatacatcgtttgagcttatttt  
catcaattcttttgggggatttagttatcctttcaactttaggatctcttcttctgctgtatgaaccttctgttggtagtttctcaaaagccagc  
aaaagacaactggccagagcagaccaggacacaacggtattcttagtaagtaattttctgtatgtaccagaaatcgaagatgtgcttttca  
ttgactgagtcatttgaatcctctgattattatagtagcaagtaacgggttactttagaggttctgatgcgaacagacaaaatgtgaacct  
gccattccccctcttttcaattacacagttaacgaaatctgaagattactatgggtaataaacatctcggcaagaattgttttgcacgc  
acctacagagtttccgaaggcttgggtcgcctctcaaaagctcggaaacggacacaagcagatggatggatggaaggatataccaa  
gaacgcgtacaaacggaattgaaaaactgcaagaccgcaaaaggaagtcattgatgccttatggatgaaagatggaacaaaaaatga  
attggagaagcaaacggaagccttgaacttaacctttgaaaaacgagtttccgctctctgtgataaattagaaaaagaatctactgctca  
tcagtcgataaaaagcagaccttgaaggagattgaaagtactcggcacttatttgcagatgtagcaaaaatgctgatagatcccttctt  
tcgcccgttgcagaaaagttgtgctcacaagtctttaaagaaaactcttctgatttcaacacaaatgagggtgcttttctgtctacctt  
atcttgaactgaaaatccgaacttctgcttactgtttcacatgttcatgtaactctacttctatgtatgtatgcttatacgttcaaaaactca  
acgcttaaaactttctttttgaaatcgttcttccctgtatcctcgttcttccggataatccttctgcaacgagtttgggtcggaggcatacattc  
tgttgcattttgatccaaccagatattaatcttctgttcccactggtattatgacattcaccgcaagattaatgaaattcatcttgttaattg  
cgattgctacttttattcaagtacacttaacactgaccaataatagaaaaactgtatttattgtaaactttctataaaatctgactgaaactgaa  
cgattaatgaatgaaacaccctcctcccaaaaaaaacatttttttttttttagccaacaaacatttttgtgtcccatcgtaa  
gagtagtagactctttgttctggaatgtctgatattggcttctcagcagctgtttgttttcatccttgttatttcttctacaggttctgct  
tctctcaactttttagcttctggctgtaagctcatttaataaaccttgcagctgctcataatctctcacgacactcattcaattatgttctg  
accaatgttaataagaattcgaaaaatgagcgtcaatgaatacactttaaacacctggaccatgataagaaggtcatagttttcaagtcaact  
ttatgctcagcccaacacatttgcgaatggatctataaatatcatccttctttagaattgagtgatttcaaatagtagcttggacagcaactaag

gcaccggtgtaatacatctatatttgaacgaattgcttaccttcaaatcctgtgtccttcatgaaaatgaggttcaatacttctaaagccaagtct  
tccaatttccaattgaggctcctgtgtcctgactatgggctcaaccttgggtaaagcgagtcatttttcttcccttcttgcagtgattc  
accaatcgaacaggatctataggaggtctattttataaaaaccacttatttcaatggttactacttcatcatatataattatagcgccatacca  
cattgtaagtcaatcaagattggagtcataaactccttttactccttttcttcttcttattcctccaattcgcgagaaatggcttctccaagtccc  
ctcatcatcatcactctctcaggctctattgtttcaggccagagggtagcaacatgctggcaactttgttagaatcagtaacaacaggaaattata  
ttgacatacttgagagagaacatttataattcgttggacgcttctctctttaccacgaggtaccgtaatacaagattccacttctattttctgat  
gcctgtacgtttaaacttgagctttacaggttaataaaaagttaaaaatgtaaaatataccctttttattgaagcaccaccgtgcttgtgtgaat  
gttcgcttttgcatgataatgtttattacttttagttggacctaaagtaccagatttgacactttacgaacgctggcatatggaattttgtaagaa  
tgaaatttttttcttaaaacaagatgatttttagtaagcaaaaaaggaataatgtttcaacatctattcatttaactgcttttaacatactat  
ctacacagggaaattttgattaaaatggagtcagttctcatttcaaaattgttagttaatgtactctacaattcttatattgattccaataatcac  
tgacggaataaaaagagcataataatctacgtgtctaccttcttttggaaattaccagtcagccatcgatacagataaacgggagatt  
atgtacatttagaaaattaaacatctcaaaacttaaaatgaaataaataaccttatgcttctcttgcacagtagatggcatctcgttggatt  
gtgatacttcagcatttttaagcatttcttctcgtaaagactgattcaaaaacacggaggatgcaatgcttttctccagtcgtgatctttccat  
tgggaggtaatcgaggcctggaggcttgttgcaggccgaatatcttcatctcaattaattcatttagccaaactcatccatccttgaagacag  
aaagccttgataaggccaatttctcctcagactctctctggtaacggtgggtatctgggagcaggagggtattctttgtattttcagtggtct  
ataaagtaaaggtaataataaaaattcctttcacgaatttctgtacagttctggctgctgactcatattaagtctcagcctactttgcaatagatgc  
aaaggtacagacaatgaatccaaccgagttcttctcaaacctagtctcgtaatccaaagaatcatctccggtatcatatgaaaatcctcctg  
ttataaatgaatcactatctcgtcaaaaatttcttctcatctcgtagtgtgaaagtgcgggccgtaaaagctctacgagatgtctatgcagcctc  
tgatgaacttcatccaatttaataccatagcgtttaaagtcatcaatacgtaaagaaccaatgtttccggaccagatacccgagctcttgaagg  
gtttgattgataatttctaaggttgaatacaaaaattcgcataaccaccaatttgatacttcttggaaatcctttgcttctccgataaatacttctc  
atcaaagtaccagcatttctcatgtaactgtctgctacatccgtcaatgcgtttaaaggcctcggaatggaaagctaaatggttaacaatcaatc  
aaagtttaacttacaatcgaatccagcgtgaaatagaattactgaacagagtttcttaaaatcccatgagcaacaggtgaaaatcggaactt  
ctcaaaagtttgcggaacttcaataaaaatcattcctcattggcgaagggaatgttacttgcataataatcagagtaaaaactaaagatgtta  
aatctcctaagaacattcataaccggttgcggaagtgcattctcctaactgtctgaattttattacacagcttctgatatctgctgattttcgatata  
ttcttgtaaatagaagaggaaagtcctggcgattgatgattcatttccaaagtaggtaattattgaagactccatctcagtaggtccgacattgc  
tctcggcaaaaataatgaacaggaactcctgaagctacatcgtattcgaatagagagtcgtaattagagcttaaatggagacatccaataacca  
cttaactttctgagcgtgcagaaaatttctgtaagcttttcttattcataaaagatgtcatggcttcaggagacctacaagacaaagaggat  
tttcaacagcattcaaatccaagcatalcttctcgcataatgattcaaaaacttagactttgaattttttcaaaaattcatgtgcaacat  
cggagacaactttatctcaatctcattttgagcacgagcggtattttcttctccgagagcgtttcttccgggaatttcagcaaatcagaggaa  
ggaggtaaatgtgaacttcttcttctttgctgatcttcttcttctcgccttgtttatcgccctcatcaggactatttgggacgtcagtggtactt  
aacagatcgttcttcttccacctctcgatgaggtttcttctgatgtatgctttgaaattttctgctggattcttcttacggttagtgtaagact  
ttcaatagaactcctctcactctcaaggtctgcttccatcaagttcatcgtaatcttcttagactgaattacgatctggaatgatgttga  
gtagctcttgcgacttttttataaataagcatgagctctgagcggatgttctactcagattagagtcctatccattgacacaacataccgga  
tgtgaattatattgtaagcaattagaccaataagcattaaatcatgaacaatttcttttactgttatactgcagtgctttaaatttccgaagcatt  
gttccaaatccattggctcttgataactgaaaaccaggttaataacttaataaaaataactaggaagagcgttatataccattgtagtagtcagg  
tgcatcgcgttctgacttttgcataaaaaggcaaggaatgctcagtgtaattacgaagggtgataatgacttttccagcgcctcatataattc  
tcttgcctattcttcttcttcttgcctaaaagtttagttctaggtcaagatgtgtcgtaccttttgatctgcttttccgacatccgcaagcaa  
ctgtttgattcagcgtcagaagcacaactacgtttcgggttttcaagatattcaagagattctgatatgcaaaaggctattagtttttatgca  
agattaacgatgaaacaacttgaattcgcagtaaaatggcgaatgtgattgctgaaatatagttagaaaactgaatgaatacat  
tttgatacagaaaaattttagtccatgaagtatcggaaagaattttgaggaaatgaagcttccagggtgaagatggaccatcagctcctaattc  
tcaacttcatctgatcgagtaaatcatcttctaggtataatacacatagttataggcaatattgctaagaacttcttagactcaatagtgctga  
tctgaaacttattataagaatcagctatataagaagtgtgtaaaaataacttaccatcatcaatctgatggacttaagtctacaaa  
cgaacgagatgaagctcactagcttctgttttctcatttttgggctgatttagcatcgtctcagggtcgtcatagcttctcgttaatttctga  
gttgaacttcttctcagcttcttcttatttcttcttcttcttcttcttcttcttcttcttcttcttcttcttcttcttcttcttcttcttctt  
agtacttctgactggaaggacttccagcgttctgtgtagcaacaatccaccattaattgagcgtcatataacatacatcggcatgaaatagagt  
tgtcatgtctagctcctcatcttctcactgcctcctgaagggtcttttctcgtcatagtgatccagtttctcacgtttataaatcattccaac  
cgtacatcattaatgatattatatttccgttttcttctgaggttaaaataagactccaatattcgttctttagaagagcaattgctaagctatga  
agaattggctcgtccaactcctcgtcttcaagattctcgtccatccaatgctagtcttgaatttataacaagacattcaactctattcttattc

gttaaaccagctcgaataaccctaaatTTAAATggctataagttatggacgtcgcgttctaattacttgaacagaataaggatattaagttag  
tagctagcagttatgaagtattcatccatgactttattagataatagagaataataaaagcttaaagaagaagattgaactattttctataacaa  
atgcataagtataatgagttttactacaattagctgagaaatcacacagcagcaaactttccatagctgaaggatataaggatacgtcgg  
aaaaataaaagctttggtttctagtttctatatttataagggtatcaacgaaaaatattgtagtagatactttcatatgcaaaaacaacatcaat  
tactccttactaatctttaaactgaaaattatacttaaaaaagaagtgcaaaaaagtaaccaagtttgaatataatTTAATTTTCCAGTC  
ttctctttgttcaatcatcaacatagcacatcaacgaggcataccagacctctgccacgataatcctttgtgcagcaccgggaggcataaccac  
ttgtggacctgaggtgtttggaaggctcattcattatagtttctgcgacagaaagaactaaagtagctgctccgctgctgacatgattgatta  
gatttgacagaactcggttccatacaaaactttcaaaattgttggcaacaccttccggttccatataacaccagcccatttatcacttttagcatg  
catcattcggagtttgtcaatatacagtgaggatcaaaaccagcattgtcaaaagttggcgagggacaacttcaaaagaacgagcgaagctc  
caatgaagtttgtgtttccagaaatggaaggagtaatccgaagatatttagaaagttccatttcaaggcaccaccactgctacaacaa  
gattattcttcaatgcatgcttaacaatcatgatagcatcatgtaaagagcgtcaacttctgcgataaactggtcagcaccaccacgaagaataa  
gggtgcaggacttgcactgggacaaccttcaataaattgaagcgtcaccaccgatctggcgttctcaaaagtgctgcaagttccgaggtgat  
gttcttcaatattcgaacatgttgattgaatggaaccgccagacgttcaacaacgcggtttaaagtcacagtagcaccactctaccagcgcagaaga  
tatcacggtcagcgaagtattgagtagcacaatctccgatgggaagcttagacaaaacaacttggcaccagtggaacagtagccttaatttt  
gaaaaataatgcccattcagcatccacaatgttttggattcctgaacctgtgcacacgaactcagcattgtcctttcagcctttagttccag  
ctgcacatccaagcaagaatcttaggatttttaagattttgggtgttctcaaatctgcgtatgaaaaagctttttgaaagcaacaccattt  
accagctgagaatcttccatagcaccgctggaacctttttataccaatcaagttttcatttaaattcttctgtctaaagtaaggacggcgtctac  
aaccattttcgtaaagaagatgaattggaacgaattagtttggaaactcatggcagtagcagcacatttctgcaacaaatcgcgtaatttttaac  
cggtagtatcgaaaaaaatcataaggggaaaattcaaaagtttgaattttcagttcacattgccttctcatattatacatacgtttca  
tctgataaatctaattgaatggctatttcttggatttgttactgctaatgagcagctttacggtagccgcaataattgagtgcgagtaacacc  
gtctccacaaaattcgggctcccgaataattaccagcaaaagcactacagacgtagtagcaccatcgcaacctcagcatcttgagcgcgag  
caactccacaagagcttggctgcaggatgaacaatgtcaagtagcttcatgatagtagcgcgctcattcgaatgacaacctcacctctgtcat  
taacctcaatttgcagctccaaaggtccaaggttgcgaatggtatcttggacagcgcgaagcattaatgttcgagagcagttgaccac  
gacctgcgaatcattagtccttcttcaagaactacatcacattcattagaagctattattgatcatatacataccaataattggaatttgagggg  
cccctacagacattctgtaaaactcaaatctagctgttggcttggaaagaaggacgtcgcgaacaataactactcttccaccatagtcga  
aatagataaggcaggttacaccaggttaagatattgaaggaaatgtgaaaattatcagaacattaataacattaatattttaggaatata  
atcgtgaagtaataaaaaaaggtttgttatgccatactcactcgtatcagatcgaatacgtcttatgtttttatcctcaataaccatagtaa  
acagaaagctattgaagtttactctacaaaaaaactcaataaagcaccggcgcttaccattttattggatccataatccaata  
taaagtacaaaaggatatttaacatcagcatggcagctattgatcctgctgcgctgtagaattgtaaattcgtaaaagtcagcagctt  
cataaactttagtgttcccgaatttcatcgggtgataatcctaataccatttccgccatagcaacgttctttgagactcattcttttacac  
gtttacattttgagcaagttaatctggacttggtaaaaaagcagctgatggatgaatattgtcaattaaggtttctcaataaccatcagcaaa  
aggatgaattgcaacctgacaagccaactgttggaaagcttaacttccagactcattacgctcaggccataattgctcatgaagacaaagat  
caaatcatgaccataccacactgctgacaggaatctgcttaactctgagttttggcttggatactcaaatgagcaatggtagaaaattcac  
gtacttgcagcacagataacaaatcttcttaataattgagctccaagcttaattttcagctaaaccgtaaacagcacacagcattttataaa  
ctccagtgtagacttggaaaacttttaaatgaacctggaagtttgggaattgagaagtttctataactctgctcattcaagcaaaccttggaa  
cttcttgaatgcaacaattgtcttttaattgagtgatcatctttcactaaggatccggctcccagagtttgagttctgcttccgctcagaaa  
cattatcgcgactcgcatttccattttgtttcagatatttctgctttagacttctcaataaattcaactaccaattctgaaact  
aggttggacaagagcaggtaaatgactttgatagccatgacacaaccgttctgggtctcgtagtgactaatgctaaagtttctggcaaaatc  
atcttccaccataatttactggatccatccataaaataatccaatattcttgaatatttaggtcaaaaagtgaaacaagggaagagtttga  
gcgacttaagatatactcgtataagatagcattctgaaccgttctggacttctatttaggattctattggtagtagcgtatagtttga  
gtccaagtctttttctgcaagtagttgtaagaacttcttcatgacaacttgtataggctgaccaacaatggactataagtagcactt  
gatgaataatccactggccagatgctgaatcattagatcagctagtggttccacttgcagcttctgccaccaattttataagttctttaa  
acaggaagggatgtgtaagccaactgaatcatactcctaagcagcttcaaatcatccgttacgttgcggtaaagccatcattcaaggc  
agcaaatcattgcacttctatctcattgattaaggctgagttaggatactgcaaacagctaaattagagaaggatacatccacgcaagcatt  
tgaataggcaccgatcattaatctcaagagaatcgttgggactgctacatgcaatacatcatcttttcaaaccccaaatctggcattgg  
acccttgtccacaaagaattatattttgtcttaagtttcttgcataagcaaatcaatgacatattgtagctcgtcactttcgaattgcagag  
tggatgtccgcatatcttgaagttgattcagatattatccaagcaccacagctagaaaatgttgatcattttttgaaacgtattgctcc  
aggatagagattggattgcttctcggcgactaattatcgtataaggcaattccttaattgcttaagattcgtttaaagcttcttggagaggtta

ctttcaatgactagcaaactgttcttggttttcgcagaaagatactgaagtattcttctgcaattaactgtatgctttctttcgtttttgctatagga  
aaccgaaaaggatgatacttccagatagctataactgacatttaagcatgtcattatacttttgcgcaattcatgatacagatcttcgattgag  
ggaagaggatcatctccagaaagactgtcataaacgataatttcggctttggctaaatgaggtagaatagacatagtaaaaacttttggtc  
aatgaaatggaatgcatatgtagttcatctcaacacctcgagataatcagcatcatttcataaggggtcacgaacatttcagggtcgaag  
cctgtttcaaatgtcttccgagagccccgaaagtgtattgtaaatcgctgtggcatccaacgtgcaggattccacgctcgataggctttatctt  
ggttcgtatgtaccttccactgaagggtgtcaaaaatcatcgatagcgtgttttcattcaagtaagtttctccggtatctccaaagtgaata  
atgttcgggagacatttccatgaggaaggatagcattactttttcaatcttacagtcttcaattcaacgttcggcaaatgtgtctttaaaca  
tgaaaaatcttctgaatgttaaacggactgaggttaaccgattgtttataattaccacgcaagcaaaactccaggactgtcaggtttctcaa  
ttgcacaatatgccataaattttggtacatgggttcagcggatgctttaaacaattcgtaaattgtctagattggaatctacgagatgtcgtctt  
gagtacgaactgtttttggtatttccatttcttttcaggattttaaccatgcactatacttccagaatcgatacgggttttctgtaaaagtaac  
ttggatctcatttccggatggtgagctgattttcttttagatacgcgagcagatagcggcactaagctcttaccttgggatccaaaactctcgatac  
attaacttgagctgaagaagggtggaggagcaacgctaaatattgcatcaatttttctgcttataacctgaattcagcagatgcaattgttaagc  
aaccagtccaggtaatggtattcagaggtactggattagagatctttgtaaagctgcaggaatagtaattaacttttgactactgaaaccaagcgt  
tcaataataatagctccaatctaatacatctcgaatatcaatattgtataggtcttattcttcaaccaaagttgcagaaaaatgctgcttaactgattc  
ttcagctgaaaaatagggcactggaatagcccgtcagcaacgggcttctttaggacttgaagagataatgaacttacaagcagacctttatc  
tttaaccatctgatcgccaaaaaatccgcaaacgtctggctgtggttatggatgtggattttgtgaccgtattctgcaagtgacttcgacatgc  
ttcgtatttctgaaatcagctcaaatagctcccatcagtaacgtcttttctttgtgaaaagaattcaagccatgtatctgcaactagtgcgactt  
gtttatagcattctcaagagttctccgtttaaaagattttaaagatttgcgattggaaatccttgatgagtttaactcgcctctcgttgcactt  
aaaacctaagctcagctagacttccatcaaaattgaaaacagcgtaacgttttcaaattttacccttctttagaagccggtaaaatcata  
gccctataaggtccatcgacttcaaaaaaataactatttctactggtagtttcatattccaaggtatccggatttttagcagtgaaatgtgtgatt  
ggtaaattttcatgaactaggtgatttaacataacacaaggataggagataaaaactttccgccagattttctttaaactcaaaatctctgga  
aacgattctggcaagatacaccagattccatcggtatctaactctaaggagcgtctgctttcaacaattgacgtgccattgaataatagtag  
cccctgcaacaagtaatacctgccatttcaattgagtaccaagagatccctttctattacataaccgtagaagaattcaaaaataacctgtg  
tgcaagttgaagagagtcatacaaaatcaccatttttagcttcttaattcagcaagactgcccgaactgtatctggacgaaagggctttgtt  
cacttttttgaagcctttaaatacatacagcagatctctgaacgtttaaactgatcaataaaaacgaatttctctgacatagatggtctct  
cgttcaatgactttattatcatgaagtcggtgatacacttctgactatagtcagctatagcttttgaatctctcagcccttctataggtgagagt  
tcgtcaaatgatctggatggagaaaagggtgttaaacctgggaatctttcaacctgtaaggcagagaggatcatatgatactcatccttttgggc  
gggtaaaactcaccttccatgccatacattcgtctatcacacgtttatctggaacgttgaagtcgatgtagcacaatgattcatccttcac  
agaatcaggctgcaaacgatttgaatcatgatattagatacatagaagcaacatccagatggtaaattttagggtttccgaccgttttggtta  
tcccgtaaatcgacaactttgacagaattgagacttaacctctcatagcttctatatacatttcaacttttctggttacaattgaaaatt  
gtaatgctttatctagctgggaaatcaattcttgatagacagtcggatccatatacaagggagtaggaatcactgcgaaaaacaccactttcta  
aacttcaacatgaccaccaacgtatgttactagtaagcatgtgtccatcaaaaaattttgagggtctccacgtgcttattaggtaaaattata  
ttttctgtagacgctgtacagtaagcagtgctcacaagcgtaccggctcttttcgaaaacttcatctggattgagaggaaataattacaga  
gagaaaaatgaatggatgtacatattcatatacagataaagtgcgacagcatctgatactgagattgtgccaacgtttgagcttctcact  
agcatagatagtcataactcgggatccaattcgataggattataaccaacttagctacagtgacggatttcaagcctgacttcttccggcaa  
ataactatctcttttaccacgaaaagcatccatgtaatacaatatgatgattgtattcgtctctgtatctctgctgaaaccgatttctctgct  
aaattcaaacatgaaaagtagtacgagcatcaacgaaggccaatcgaaaaatcaccgttataggttaactatgatggtaggcttgacggatc  
gtatatgtttaaaaaacgctgtaacaagctcaactcgtctcattaaataatgaaaggtccctcaaacctcaggctgggagataatgaa  
aatcttcaaatcctcaccaacaatctcgatgttgcgattgtgatcaaaaaacttggcctctatcataagaatcatcataatttgtcaaatgagcta  
tctggaaatttaaaggaagctttgtagttcaatatacaaacccataactgttgctcagcagctcgatacagtaggaagatgggctatttga  
cctgtccttcgcaaaaagatactgtgtaccacatacccacagaatgtcaagatcaatcagagctctagcatgaaatggcagctcaaatcgcga  
aagtcctgtatgtgtccattggatcatcataggcattgtcgagagacaactgtttgagtcattaagaggcgcataagattgaaagcttctcct  
tgacattattgactttactgcagacataatggcagctcgaactgattgaaggtccgttaaattgtcaaatgttaatttatatagtttttatatcc  
aactatgtggttttcaattcaaatcatcctgtactcccgtgaggtagacttcaacagtcagcaaaattttttcatgcacttctacacttgct  
acttttcttccgtgctgcaatgtagaagatggtgcataaggaatggtgacacggaatgtttaccatcgtctgaaatgaaatgaaagtcgaca  
gcacttaatgtagagttgcgctttggcttcaataacagttggatgaacgtttattaaccaagcttccagaggaggtctccttccagggatcaa  
aaccatgattcgatgatttctttccgattgacatagtagggatcacttagaccatttctccgagggccttcttaccctgcctggaagg  
catttgagttttatagatatttcgaaacgacttgggagggaggttgggacgcttagcagaaaaatgggaggcattataaataaataaata



attaaaacaaaagaagaaaaagaaaatgtatgaaacacagcttaagaaaagaatgtcagagtgtatcaaaaatgacaataaagatggaacg  
accgtaaaagagtgtactatttatacgaataactattgatagaattcgcttagtctatacaaaaatgcatttgaaaattgtcaagatgccaagttt  
gggacgggtgtgtgtaataaggaagggtaacatagttagcgagaagaacaagaaatgaaaagcgcgtcgcgtcgcctccagaaa  
gtaaacagatggattctgtgattctttctttttttatgtttcaattgatcaatgattttcaataaatgtagtctactatggtttggatgt  
agatggaggaattgccctagaacaataaaaacctatacacgtttgcgacaagtttaggtcagtgatagagaaaaggtttgtagatcttgcctt  
acttcaaaaatgatagaatacatagattggattgctttcttggtatgaacagtaaacagccgagctttttgttttctgttcttggttgctgta  
ccgtaatctaagcaacagattttcttagttgttgaacatattgtttcatgaattcactttgtatctaaactagtatagtaaggaaccctgggtg  
catattatgatacctctggcttccaccgctacaacaacagttccaccatgagtgaacagaatgagcctccgaaagaaaacattgtccaggc  
atthaaggtaatttgaattgaaatcgattagtagaagatttgaacagatttaaatagtcctaaagaagacgactttgtccatagcttta  
tccccctgcttaaagaatctgtttagtagtcttttgcgggattggagtaggatgcatcatttgttatgaaaggttaagggatggtttgtc  
aagtctgatggcgatctttcatcttcttagacgatcagattacttacaatagtctagctcctctagtaaagctttaaattggggattcggcacat  
atthggcatgagttggttcatgggaaggatgtaattaccgtaagcaattggaaactcaaaactcaaatcaaaattcaagaagcggcacaag  
gagtcctaagcggacatctcgactgtgaaaacgattcgacggatgctaattatattaatcatcataaaacttgacatacctacaat  
cgaattactaattgaattcatttagctcattttaaagtttcttctgtatggaataataatccatcttttggatttttagcttctgtatgaaagaa  
aaagacatagagagtgttctgtataaaagaataggggatgactattaagagtattccatctctatctcttctttgtttccaggagttt  
acaaatagaaaactagatggattcaattgcttacatccattaagtgtacctgacttctttatggactacaaggattaacttttatttttaaaa  
aataaaaataaaaagatgtatatatacatggaatatatttgaatttcaaacatccaatgcaacaagaatacttgataaatcatgttactt  
tgtcttcagtagcaatctctgagaacacaggtaaaattagaacttttgcctaaataacagaaagtataagataacctataaatctaaaatctcat  
ttcaagtagaatgtatctgaaatcctttgtttaccatgtaacaaaacctgttcgtaacaaagaagtggtctatgacgaatcttcattgaaat  
aatggcaagcggatacattgaaataaaacaaaagtcagctcactcatcatgaaaccaggcataaatcaaatgaagatggatttcaaat  
cgaagcggagaacaaatctctgaattcaagcattcaagaatatctcgaaaattacttttaaactgcttttaaacaaaattataaaaaga  
aatagtaaagaataggatagttgaattctttcaatttcttggaggaagataatagttaataatataattctattatagtaagttaataacag  
gcctctggccaatggtaaggcctgactacggatcaggagattccaggttcgactcctggcggggtcaatttttcaaccattcaaccgta  
tggttaagtcaactaaggtacgccgtagtgaaattgctactgaataattattatcaagttaaacccagtcataaaataacctcaatagtaat  
caatgtaaggaaaggataggttaataatctcgacctaataataaactaaggtcaataaagttgtctcaattaatgtcaataaagatccagttta  
aaagcactagttattctcttattcttctctaaacaataaagaaaagactgtacttatattataagaaatgataagtaattgtacttctatcga  
atcaataaaaatcaataaatcataggaaatttaattgaataaaaatcatttctacttatggttaaaaaggaggtgccttaatagttcttagttat  
tgtattctatgtttttttttttttttttttttgtatctctgcagtaagtaataattctgatctatatttttaactacaattgcctgtatcgtcc  
gtagagtacttaaatgaaaaacagcaattgttagttacgctagttgttattttgtgtctcggttaacaaacctgtattcttattcttattcggttga  
ttcaattttataataaatattgagccttctgatccagatggaattcaaactctgatgtatacaattctataaaagagctgagctacttt  
catttctggttactatgctcacattagtttcaagactcgatttcaagtgattacttttctggattgaacagttcttttatattgtttctttact  
tagttgagtgaattgaattactagatggatttcttctcattttattgtttatttacttctactgtcatcgtattttttgttaaacttctatgtctata  
aagaacttagtaaacgtcgtctttaccttagtcatttatacgttaccatagctcgtatctgagtggttccctcaaacgggtcgttcatccctcc  
atatagaacgtaacaaacctgatattccaagtgtagctcctccgatcatgtctgctcagttcacaagaagttacgttcttcaaacatcac  
agatggatgacttctaatggcggaaaattattaactctatctttaggacctgaacgatcgttatgggacatgggtaactgtttcgtcgc  
ctcgtcgtttatcgatccattagcttacgagtagttagttttaggaattcttctgatcaaaaatgaattgaaagctttaccttcttaacacat  
gtatagaacgtatgcagagcattctgtcacgaaagacatgacattaaagaacactggtttaaattgctaactgaatgtaatatagaactatta  
accgatggacgtgaagacctatcattattttttttccgggttaattgtctttacatcattctgttgggcattctttttgaaaatactctcaaa  
ggttacattccctgttatgttccatgctgtttgtcgattttctggctgttgatttattctctcatcatttattttttgttcaaagaagttttactta  
aagacattatcgagagctgtaacccttgggccattgagagtcagttagaatggaaatattgcttgatattcattgcaattctttttctgtctt  
tgtcttttatacattctcagctgattcttttccccttattagccgttcaattgtatgtccattcattttccatacctcctaacttcaacgaacaaa  
aagtattctttatttttaggaaactcgtctatttgggtgcttctgactacacctttaaacttattggaatcaaaagtagcttattattatca  
aaaacaattgtcaacatactcttcaaccactcttaagctttaccgtttttaaagatactcatactcttcaacccaattcccatgtttctcatt  
atgtgggactgtcactctgggttaacagtcctcaagcatgctgttccgtttatttcaaaaatgatgctaactcgttatcttttggtaataattg  
atthcaattctactaattgcttctacggatgcagaaatgcaattacacaatttcttcttcttcttcttcttcttcttcttcttcttcttcttctt  
tttttaacgcaaaagacttactggacactgggttaaaatcccaagaattacaacattatcatatcgttatttttttcttcttttttaaaatccgtt  
gttcgtttttttttttttttttttttcagcaaatgtcttattgaatcgaattggtagctacaaaagttggctaggtacccagatgtgaatctcgaa  
taaagaagtcagatcagattctacgtttctaggtgattcccctgtattttgaaacatgtttcagtgaaaccagatgacattcgtgtggaact

gtaactcttattgcccgttttacttcaatgttatgctcccatagaaggggatgaaagcaaagagcgtgtgctgtatatatgggcttgccatgaaca  
ggcgtgtagaagatctcccaaatcaatgattgcttacgtgggggttcaaatcatccaacctgcgaacaagaaactgaactacctaaaaaggcac  
taacggaagaaatatttaagccggaaaagattaatccattcacgtcttctccaatacaacaaggctgcaaatctttctctagttcctttctcg  
cccaacctttcacctgtcttcaaccgcatcttctcacctaatacagcttaataatgaaaaggatctgatgaaaacgcagactcatttgctc  
tatggcactttctgggtctaataaaaaatccggaatcgaagaactccacatctgataaggtgatggtgatgctcagaatagcctattcatcctcag  
gttactactacatatgactatctattttcaaaatttcaggaatgttcttaacgttcgattcggaatacctaccgaagtcattgaggcgaag  
aaatgaaagaagcttcaagtcttataagttacaggaaaattggatgcctatggaacctgggataatgaatcatatgagaaatcacctgtgtct  
atgaaaaggcttttgaagtttactgaacttatcacacaacctactcagtgctgctgttatgaacggcggaacacctttgttagcttctaa  
tagagatacagttggaatatgtttaccgaagttatccttacagtaatcctttccactgttctttgcaagtctcaagaatattcgaatgc  
agcttatgccctactcaatatctgtgctgaatgatgaagtggcagaatggctcaaatcttagttgctacttgcctatggattgcagaccgatta  
aataagaatcaagttgggtatgcaaaggaatgggttgatacaatgggagtaagtggttcatatttaataaataatgattatcgatgaaaa  
tgaacactacgtatagctaaactacgatgctttgttttaggaaaaaaaactgtatgacaagaagctctcattaagtcacaagggcacatatc  
aaatctatggaatgttctaagtcagtttaactgctgattgtcctatagttctgtgaacgttctcacataatgtaagctgaaatcgaatggg  
caattcagtagtatctgtagatacattgagacgaacatctcctgatgaattccattttgttagaggagacaagcgtgccaactagaggatt  
aattcaaagagacttttgggtaagcaataaagattgaagtttgcatacttccgaaaaattggaattggaataagtagcaagataaca  
aatcttccgtcagaaaccttttaggcgctaattggaacctacatgttcattagagaaaacagtagtaggtgaaacgggtggtttggagaatct  
gcttggtagataataaagacatgtttgaaaagttgtcggagagagagattgcacctacagcaggagggtttcagttctatcaagggacttggg  
tactccagcagacaaatcgaacaaaggattgctcttctcatggatggtatctgaacatttgaagtgctcagattgttagacgaaccaacatctaa  
gtctattagcaagtcctagcagactgagatgcaggagcagaactgactctggaatttgcatttgccttggaaaggttagagggtgactggag  
cagagcatgagcgttggtagacgtattctgtcagagtgaaagtcacctttaaagatggtcactgctgagtaaagcgataataaagact  
taaggtcaataacactattgtaatagtcacgaagaatccaattcctcaaaaatcttactttagatgacggcgctttaaaggaataagcaa  
gttcttctgacaaatcgccgaagagagttatcagcttccgttatttcaatgaagcatttctcaaaaagagaggccttctcacttttgcagct  
ccactaagacatgttctgtatcggcgtttatgttcagagtcgaaaccggccatttttataagtttgggttccataaggtcatgaggggta  
ccgcgcggaatgttctctgtagtttagcagacatagcatcacggcttctctttcaagttcttcagcagtttttagcacggatttctgacttaataca  
gcaaggtatctttgcaatttccggaatgatagcctagaaaagttagaatcccaatcagtttcatattgtgtcattttcttacttattatagg  
acaagagctgtgcatgtcgggataaaaccaggcttcatggtaccgatcagtcggcagatggttctgctccattcctcaataagagaagg  
atcataactgaattttgttaaacgagaaggtggtctctcaggaaaacgcggacaaatcgttgaggaaattcttttagcagatttcaaatgaa  
atgcataaccacaattttcacgcaaatcagagaagctaaaggaaaaaagagattagtagggcaacgacgattgaggttcatacattca  
gggctaaataagctactgttgattccgatcattcactttccggacaattgcgaaagcagcttcacgcggactagaaaaacgaacatgtcagtc  
aatccaaataagaatacaagctcaatggcttactcatacatatttccctgtgcttgattgattaagtcgtaatgccaagttcagagccaagt  
cgggctcaaatgtgaatggttccgtagcattttctggcattagcatttttcttacttacttaactacgaattaaacggtaaagcttgcgtttgca  
ctagacatgaatcctacgtttcgaattccttggcgtttgaaactcctctgttcttactcgttctcaatatcaagaaggaaaagattacgtag  
cgcgtaccatcgttctacaaatgtttacgaattgaaaccgggtatcgtaaataaaaactgttataaaaggatggaattatcagaaaaaagta  
gctatttttagacaaacggagagagaagtgaaatgaaatctgaaagaagcagttgaaacctacgaattcaaggatggaatgactggc  
agttctattacctgtatagttgattctcgacagcacccttagcaatgaagatatactttgataaaccaatgtgtacttatactacgaatgcgta  
gcatctaaataaacggacactcaataaaaagttgctttgtcagaaactaagcttataccagagcaaaactatacattttgcccctttggact  
tcgtttcttgaatcactacactcacttttattgaagatcaaaactaaatgatttctactcctaaagacatttaagcaactcccctaagagcac  
gtctgcggtcacgctctcagtgatgctgagcttgacacccttgccttgggcaagagatccagctcttgggttcaccaataacgaatacgtt  
ggagagacgggttagcgaactcacggccaaggtccttaacgtggatgatttcaaaggaaccaaggtggttcacgggtgaataatggtacca  
acacgacctatgttacggccaccagtgaccatgactgggcaagatcgaacttaataatcctcgtatcttgggttccaagttgagcttga  
tggtgtcgttgaccttgatcaaggatcgggtaacgaatggtacggcgtcatgagtgacgaggaaggaataacccctggcaccattgac  
acgcttgacctgcaaagcttgaacttggcttctcagcagtgatacgggtgaacgggtgaaacgtcccttaacatcatatacaagacggaagttc  
accgcttttcaatgctaatacgtccatgaaaccagtagggaaagttgtcagtagcggacctttccgtcagccttgatcaaacgcttgcagag  
aatggccttgacctacgaccttcaaggcacttagagacgggttcgcaagaaaacgatcaagggaaggcactcagagccttatgaggacca  
gcagaaggcttgggagcgtgaagaccagaaagcttgcataaaagccagtggtgagggggcgacacgctttaaagcttttgggtcctcgaac  
catttttgggtgatgctgttcagcaagcctaaattttggcctaatgctatatgtgactgcttgggtataccgaagtaataagttatgttcat  
agtgcgttgcgttttggtaataaataaactacattttgaaggaattggaagaaatagaatttggtaagagtagaaacataataatgactttg  
aaaacgtgggaatcataagcttctgaaaccaacacgtttaaagaatgctataagcaaaaagtgatgttcatgaagacagaatcaggctttg

aattacacaaaaatgtatatgaatctgatatacgtagggaaacaataaaaaatgttatatagtcgtcattcgtaaattttgtaggaaactttcat  
agaaaaatcgggaaagactaatgagagaaagaggatccaaaaagaattagcttacaattttatattcggacgcgcataattgttaacttgac  
gttgcaaatcacttgatacatgcttgataccttcttccacccttttgggcaatccggaaggatgagtagggcgtggcaacaagaaaagtatt  
gatgttctaaagcctgttgagctgtaggctgctgtaaggatcataatcaagaaacctctcaaaaggctcaattcctcagctccctgcagccgaaa  
ataatgcttccattcctcgcctggaggtggaatggcttcatgtcaacgaatgttgtagttgttcatcctctgcaaaacggctggctctgggctac  
caaggcgcggaaaaatgacattcagttgatccaaatctgttccacctggcaataaggagtacgaagcatgagctctcgaaaatacatccaac  
gctccacatatcaaccagttccatagcttctacagccatgaataactcaggaggctgataccatcgagtaatgacctgatgactcatgtgatt  
aggcataccgtaatcttgaagaccacaaatctgctagttttagaactccatcgctagagatcagaaggtgttggttcagatctcgatgcaga  
ataaaacgagaatggataggtgaacctcgaagaagcataagcatccaggccttaatatgctgaggttgaaaaaacgataaattgtcctta  
cagcatttcaaatcactgtcaaggaactcaagaataatattaagattagattgggtgcaaaaacatccattaactcaattacattgacatgtctc  
gttctctcaaaaatatttcaacgtaaaagcgtcaaatcaattccatcctgaactgccccacttgatttttttaaggcgaccctcggcctgtt  
cctttggcgacctaaagtcatgtctcattagatttgacagatcaaatgtctaaaattcggcatcttcatgaaaaatcatataacttacctaaaa  
gaccactgcataagttcctcactcttacgctcctaacatagaccattgggtgactttcaatccatagcgttgccttataagttcgagc  
taaagaacaaaaacctaataatacaaatctggagtgtaaaaactgggttaaaagggtgcaacgttccattcgttgaattttgtgcaatg  
ttcgtctcgttcttgaatacaacgtctaggaatgtgcttctacgtttttacttttcaaggaacaaaaaaataatggatccctctagtaa  
ataagtagtaatttctgttacagggtttataaaaattgctttcagttgtggaagtttaggtgaatgaatcataagttaccaatccatcgtg  
atgtacagcattttaactattgaattgcttctctatttctcacatttttattgtttgtaaaaaagtagcacttactatagttaatatagttgaggt  
aatttgcttgaggccttgttggttacacctaaggcctaattatcatagtccttaataacaaggaattgtattgtcaacaaatcttta  
gaagtatacatttaacgaaactaaagtaattatgtgtcagttcatccgattgtgtgaacaattgtaatgccaacggttttcaacctcaaatgaa  
actacagatattgcaaaaaccaaagtaagtaacttctcactttttagaataatatttaggtctgttgattgagttcaaatcctgaaaca  
gtctcaattgatgtcaagcatcggttaactcattgagacagtcgattccatcatcataagaacatagccttcaaaacacttcaaaaacaccgcata  
tctctcaattcctttaagtagccttccaacgaaataaattttctgataaacattgaaaagggcattcttggcaaatccaagacgctgac  
tcgatattcgtccacactttaagcgataacccattccttcttctcattgcttgcgaacctagtggtatcgtttagcgacacaaataactttta  
tatctatcgtctgaagaacctgtataggcaaatcaaaagttcatgacctccagttttcgaagacataactacaaaccttgaaggcaatgtt  
aaaagacacagaagattaagttcacctgttgacaaaacctcagagcttgaacaactgacattgacatgacattgaaaacactgtggac  
atcaaaagtaacaatgctgatgaaggccttaaaagacaataaaacctcgtcacatgcaaatgattgcccgtcgagggtgcttggaaacaggac  
tttctgttgggtccgggaatgcgctagcagacggcgggaccgtagcatcatcatagcgttcgcatcattggactctacgtctgtttaccacaag  
tgctcttgctgaacttccagttctatcccgtctcgttcttttatacatatttctccgcttcatcgatccagatgggggtttcggttaggaatcc  
agtattggatacctttgagttacagttccgcttgagcttacagtgacccttattattaatgtctggcatgcccctgggctgtctgtatgga  
ttaccgtctttatgaataatcatcggtcaaatattggggaaacagcgggctatggtgaggtgaattcattttgagtagttcaaaactattgctg  
ttttggattcttattccttagtatcattattgctgctggaggggtgccgacagataccagaggtgtgattggcgtctcctattggaatcgcttga  
cgttaataacggaattaaaggctttgtgctgttctgtcatagcaatctttcatttccggtacagagttagtaggattagctgctgctgaagca  
aaagatcctcataagacaattccaaaagcggctcgtcaaatcttggagaattcttcttctacgtgtagcattttatgtaacattggttata  
ccttcaataacctaactcgcaccactggagaatcggatgctctttatcgccgttgaatcgccattcaatagcaaatatcaaaagcacttc  
ccagattatgaatgagttattctcagttctactcttccggttgcaactctgcatcatatgcccctcaagacactttcgtttagcaaaaatg  
gttcgaccaaagttccttatgaaaacaacaaaagaggcatccaattatgcaataaataactttactcgaagcattgctgattttac  
agaggcaggagtgggaggtgctctcctgggtggctttgtctattgtgactctcactaccttattggggaagcattgtcttagtcacattca  
attcgaagagcatggaaagcaaaaatcattcttgaagaactcatttctcagatgtttggaattatggatctatataaggagtagtcatg  
accttatagcacttgagcccaactttatgtggctatattccaattgataggccgcaaatcaatcagtttctcaagcgtatttagcagctcct  
ttggtggaatcagttatacattttgaaactctggaagaagacaagcattgtcaacgttaaagaactgaccttttagaaggcatggaactga  
accaaaaggatgagcagcaggttaggagaaagacatcaatggaagaatcttccatggtaccaagcaaaaaccggaagtataagagcagtc  
aaggtagcatttgaaagagaaagacgagactattgtgacacccgagcctatatggccaacaagccttagaacatcaaaggaaaatttggtt  
ttattctgatattttgaaaccgtggattcgttctgctgatcattgtctcaaatcctcaggaataaaaaatagcatcagcattagattaggttc  
agtacatcaatagcatattcacattcacaacagcagcttaagaggaatttgggaatctcattagcattaggtgacgctagtttccgtgaatat  
aattgatccatcacagtttctgctgatggttcatgatgtcttctcgttctggattcagaactgttcagaaagatgctagaagagtttgattctct  
ctggttaggaagttgagtaaaaacatcatttggattattgaaagcattattgattaagtttctaaccgtccatgtccacaacgtacttttctgctg  
gcgaaatatacttgctaactgcttaaccaatgctttttgaaacggtattcttttcaaagatgtttcctgtttcttgtttgcaatttccgcatca  
ggatctggcagagggtaagtatcaggagcaattcctggtactcgatataccacctctcgtttttgtttactcgggtacgatgtctttgtacaac

atcttttagcttgcggatgcttcttactgcgcttcatggcagattcggcttcggggcagataatctttcggatactttgactgcctccttgaatcgt  
gttgcaaaaagtggcatcttttggcttggagctgtgcttggaaatctttacaaagggaggagacgacggaagaccgagagatacgtgaaaac  
tggtgattgagagcatgttgggatttgaagtaccataaacaataaagaaaaattgtttaatgttgaagagaggttcaaaaaggttaccaa  
aagaatcctgccttggaaaacgcgcaacaataatgaaaaactgttcaagagactttagaaaagtacacaacaactcgagaaaatctcta  
tataaactctgccacaataagtcgtaaatctgtagaataaattggttagagaacgcccgtgcagatggaaaggtgaggtttagccatataatcccta  
tagcagttcctcttccccatttctgttccagtgaccgattaacgatgtcacgttacggctccttatataatcataaaagccaatgaagaagtgtg  
ggaccatcataaataaacaataattgccatgcacgaatgaagaataaagtaaaaaataatcgtaattgaatacaataaaagaagaag  
tttaataatgtaaagttgaataattacaatgatcttctcgtgaacaatgagctatcatttaaaggttggatcctctcaattgaatctataa  
acgaaattatgatttttaaggactaacgaacttctacatgaaagacgatgcatgattttgggaattaagtgaataattactgaaatacata  
cctcaatcagatgaatttaagaatacctgagtaatacagatcagggaaataaggagaatacattgacgaaaacttgcatacattatggattaaa  
gatgtcgaagccttctactgtgtgtgtaataactgaaaaataatcaatagactctctgtttgatcttcaggaagcatgaaaagtaataaatc  
ttctcgtattgttactaacgagtagtcaagagcatcgttattatccagttttgcttgcgaatgcactagttactcttggaaaggaaaaa  
aaccattatcctaaccagatataaataatcaagaaaaactattacattttctgatataatgcatgattttgtatcggcttttctctcagta  
ccgctgaaaaattttaagggttagggttatcagtaagaagataaataattgctgtttggcacaatcttcttctgctcaaaagcattttgcaa  
aagctagcgtatctgttcttccctttaccagaacagccgttgcaggtgtgtaattgactgtttgattttgtaaacatttctaagctttaa  
gctttaggatctttaccaatgttgggtatggctctgagataggtaaaggttcttgaagttgtaaatgattatcggttataaaatggggttta  
tacgcttgcgcttagtaagtacgtgttattctgttgcgctcagcatgtgatgggaagagttgaatggaccattgcttggcgtatggtctgaagaa  
gcgataagagttgccattgtagttggcggactgtcttctgatctattactgaatgatataatgtaggtgatcatcaacgattatgattcagcatga  
acgttcgcataatgatattatgcaatttgttattcttgaataatattactcttgaacaataacatttgcataaaagattgggtgattcaac  
agtataagtagcatcacaacaataatcgagataaaaatttacttacaattgaaacgcctagacaggtagaaggcctatgttcttctgatgaatt  
ttcaacttagatttctgacgggttagtctgttctcctcaaaagctagcgttaactttgcttgttttctcctgtaagcagatgcatagttc  
gagaaagagaaaacagagagttcacatatctatattgcgacggccgacgggacagtgctcctgttctcagttttggcggttggcgattcggag  
gttcgaaaacggtccataatctccgaaagctcttctcaaaaagctgccggtcgaactcaaaccttctgatcactattcggctatgtgaccaga  
gtgggtgatggggataatcttctttaccatacgcctggaggttgggttaggatggcattggttgcgacaagtccttctcaggtctgctt  
ggcttcaaaaaccatttctgttctgattagctgggtggatgaccagaatcaggtactttggaaagaaagcccaaccatttctctagatgcaa  
acaatttctgcaaaaacgatttcaaaaataatgttggataactcctcaaaagattgaccaatacttagactggtagctgggttacagtactat  
ccaatctctatttttctgaaaaggatattggtcccattatggtccaaaagggttagctgtagttacgatgggaatgatggtgtctttatcc  
atcaaaaaagaatacttgaatcttctgaaaagaagctaaagaagaagaactgggtcttggctcaagggaacagctcatattaccatct  
caatataagcgaacaataggatatacactccttactcttctccttaatgcatgcttttgaatctagtattgcgattttgagcattttccctag  
gaattagagatttctcactcactacatattatctatcaactaactcctatcaaaaaatttttactctaaatgattgaaagcttctgttca  
actattgtttacaaaataatgaggaaaccctaaaagccactatccaacattatgactgccttattcgatactaattggttacgaaacctcgtaaag  
gtctgctactaccataaacaggacgaactcttgaagtgaactatagctttaaataactttatttttttttttttaaatcaaggaattggtgt  
acatagaagggactcactttagcagaagagccgaaatgccccctccaagtggtatgcttcatatgaccgagctgtgaaaagtaagttcaaa  
ctttctataaaaactaataataaatgtttagaggctacgaaaatacaactggctgctccgaagagtaaacatgtggaattgattttgcaagctac  
gtttgaagatcctgacacactagatacagtcattcaggatcttctgtgagcggatgaaggattcttcatgactgtcgttttaaatcactaatgat  
ttcatttaatgctaaaagatggctcccctgtactacgatagtagctctgtcacagcagacctgtattctagagggtgctgagcgtctccttgac  
aactcaaggcaaaaatatataattatagccgatttcaagtgaagggtaaaacaataatggccgtttaggggttattatgctcaagcagcgc  
acggagccaagaaactcaacaattgactgtcacaacggcttattgcgtcatgtagaaggcatccagctcagctcggcgtctctaaagtgct  
agttcctttagaagagattgacaacgatattaccgtgacatcttctcgttactcgtgggtgatttattagtctattcaagcagtgaaacatcgg  
gtaatacaactgttagagcatttttgatgagtcacctgatgcagaacaatcccttcgatatacaaaaacttctcggcagacagaggat  
gtataaaactttttagcactgctcgttcttggaaatcgtcaccaaatcccggttccaacataaaaacatgccctattagttgacggcatcact  
ggaagaacttaaatgaccccgttttgaacaaaatcgaatcaatataatgaacaaaagacaaatccaatgctcgaatgttttaacc  
tttccgagctattcatccacaagcaccagaaggaaagtagcaaggagaaactcctccttcaaggataatgcttcatcctttgtagatgaaatgt  
tgaagaaggaaacaacttccattgaatttaaaaatcctctcctcatttaatacaaacagcgtttgatattccctctattccaagcagctgtg  
ccgaactcattaaatcccttcaaatgcctctataccgtatcaaccacagcaactcaagctcctatgtcggctccacaaatgacaggaaat  
ccatagctcaaatcacaactcccctgtaactcttacgtccaaaatcgtcttctcggccaatgcaaatgattacactccttaccaggt  
tactaatccctacaactctcaagtagagcagctgtgaaatctggatattgaaaccctttcaaaaactataatcctcctaacacacttcaacca  
cagtcgacaggatttcaatcactcaatgactcctgcagcattgcagagatatccgacggattccgcatcctatgtagcaccgaaattccatcat

cattactggagcaccgaaaggcttaacaatggagagaccaatgtctgtcacttctataatacgggtgcgaattataattcactgcctttgagcc  
agcaaacacccatgaacgtcccaaccattctactctactcttttaagtgttcaaaaaatcctttcacaataggaaatccgaagagattgaaa  
gaatagcccagaattcaacgatcggcgagtctagaatccattccgagataaatatggcttacctttatcctttaccgttagaatatctagctagg  
catattcacaacgcactgtaattatagcaatgtaagttaagtcgctccttgatttcgatttgattatgcttaaacccatgtaattgaaagtattcc  
attagcgttcataatctactctacttgaacattaataatgtaaattgttctctgcactatcaagaacatacttcaggatgatgcagttgtgtaaac  
cgctatagagagctttaagatttggactttctatcgtatatgatttagctcatacatcacttgtgcactagtatatgcgttccagcatccacaatag  
taatagaggtacttcatacttcatgaaaccattttgatcgtccttctcttaatttgaagggaaccagggttaaccttcaacaatcgatgctcgt  
cgctacatgtattttctgcaagtttcttccatttaatacttcaggaactcgatttgaatttagcttcccctaaactttgttctattcaactgg  
atcaatgaaaaactactgttccatctattccctgatgcttgtagtctgagatgagataggtcacaatctttcacaaggtttcccggttcaat  
ctagtcggtgagcatttctttatattggcaaatcaattagaaaaatggaaggtttacaacattgcactatcccaattcttataaaagtaag  
cttatactgtaaacgatacagatactgccacatttggcattttcatccattccttacagtaacaacgttctctatcgagagacattgagagtagtga  
aaatttactgttatagcttatagatgaattggttactcttctccgtttaaagcatttctataactattcttgaagcctcaaaaatgatcgtt  
gtttattctccagaatgtattagctgtgtttatcttccgtaaagaggatgaagcttattcctaaatgggacggttacgttatttttgcatt  
tgccgggtgattgaaaggttacttcttaataactttcaatggtttgttcagacacatttcccaaaaacttcttatttactcgttctggtgggaggaata  
aacagaagtatctatttttacttcttctgttgttactttcactaacgaatttgttgcagaagtcggtattgaagcaagtgaaacaacc  
gtttcaacttctttcacaataaccctcaattcaatcaaaaatgagatagctccagatttttctaaaaaaggacaaaagtttgcactat  
ggcactgggtccagttgactggatcagcttcttataatgctcttgcgaaaaacacatcttagacgagcaattggaagttgatcctgaacaa  
gtcacttggagagaccttagagattaaggaacatgaagctgtacgctcatagcttagccactgttttcaactttttccagatattcaaggag  
aggaattccgttctgactgctattgagcctcgggtttggcgatgctttagatagatcctcaagatgagctatgaaaatatttgcattg  
tatgctaatgaacgatagctttagtgttactgagatttggaaaatcaactgcaccaagtttagtgaagaatccaagattcgaagaactct  
aaatttgtgataaggttagaaatcttttcttttattatctaaactgtaatagagagttgatccttactcttattgaaccgtacggacattg  
ttatccgaatttgatttgaagcaatgagacgttttccagaagggtaaatgtcacaactgtcattggagttgccaatgccttcaaaaggaggaa  
ttgaatcgcttcaagcagagaatctttcaggaactcgtttagagaacatccaagttttgacttccctttgatgacgatgaagatgaagatgaag  
ttatcaggaaaataagcggctcaagctgatccttccatttctgttcttggcgctgcccgtgggtgattatcaacaggattccgacaagcttgtaa  
acacttccatggggaactttttatgtgacgatccgtctcattcagacttttagattgaagactgttctgttctctcacttcaacaccttaag  
tttattactcagcagttttattatgaagcctatctgacagaaaggcttctaagcttctgttatcctcgaattctttagtattgtttactttataatcaa  
atgctaattatattataggcatatgctagttgacctagagaagccaaagctagggcctgacgaactaagtgaactaccatcatgaaacgacg  
gttgagctgaaattcatcaactgtcccagatcaaaacttctcattcacagacgagttgtcaatccgcatcaaaaaatgcgcaatcaattcagat  
actaatctgcttccaaagtctcaaatcaaaacaaagcttcaaatgagagactctattaatccgagacatcaactagagttaaaactccttct  
attgaaatgagttacgtgaatttctcaaggaactcttctaagaacaacaagcaagttaacgaaataactgaaactaaagaattaaatcgg  
acgatgttctcacggctcgttggaaaatgttccctataataagacaagtaaaagaacagaaatggttattgtccttctttagtccaatatt  
cgggctcatgaatacggttcgtttattgttcaattaagtacttagtatacgttatcagaactagataattgatgagattccacaagtcatttttaag  
taaatttatagctattaagttggatgtaaacacaagactattgcttgacaatatttgcgaattccacgggatttttgagcaattctctatcta  
gctaatttttttaatttctcagacataaagctgtttacccaaaaaagattaattgcttatctttagttcatttaatagcaaaagaatgaactgtg  
ctattgaacaaagatttctcaaaaaatgatcagcgttctggaactatttagacgactaaaaatcagagaaggtatccaaattgatacatgtc  
atcagcgtgcaacaggagaataacaagtctagttccataattgtgcgatggttcttccagaaaaacttatcttagaaaagaaggatatagaag  
atgagcaaatattgaaccaagatctcaactgactatactctgctcgtcggttaattaagaacaatcgattgctgtaacgattttgccattact  
ctgaattcctctcaaatataacttcttaattgcaagtagcaactcactatgggcatcttgaaggaattgctgaatgatcaagtgcttctatccg  
cattgaacagatgaaagacaggaacaatagaagaacgctttgtacgagcaaggtatcctaacgcgtcaaaaaaacatcaataagaac  
agtattgcctgctttaaacaagaatgggccattcattctcagcagacaacataaatcctcaagggtacatccatgtgtaacaacaacat  
aatttaactcgcatatacattatgcataattcaagagtactccaacaaggagattactgaaccaagttataaaacaaagatcaacaactga  
agataaactgattttaaaagcagatcctaaggccattaactacttacacggaaatggaatacctcatcgagatcttaagacaggaaatatct  
tgataggttgtaaaatcagtgacttcgagacaagtgaagcagtaattgagaaaaacggatattcaaaatccaagagaatattaagttggctgtt  
gacagattgacatatttagcaccggaagcttttagtgaagagcgtgagataacgcatacgaacatctagtagttataagccattaataacaat  
ttagcatattgtgggacccgatcagaccttagttgtcggagctttatcaaaagtcgattttactgggtatattccttccagttagcaaaactaaa  
ggatagaatgtatagttgatacgttcagaatttataggaagattctaaagaaggcactactcagtatcctgggaatcaagatctagcattaagga  
gtctgccagcttcaaccacttccgcaatacatcaggcgcgaaaaagacaattctgttattactaactcctaaccagctcatctatagattca  
atccttcatcttctgggtacgtaaaatcgattgctgttgcgaagtaaaaccttttttgcagaatcacattcttccgatctcaagagttct

tttcgacgttccaaacctgtttcaaaaataaacaacttccaagaatccataatcaciaacggttgtttatgaacaatgatcagtgactagttcatc  
ctataaggaattcatccatcagccaatagtgattaaaaaaaaaagcagatatacagatgtttattaattttaagtaataaaaacttttacattgc  
ttttctataggaaggaacatatgagtaggtgccggaatccctactacctcgtctaatcaaatcacccataataaataagcaaacggtg  
aaagcatttctaagggaaaaggcaactgtattggctttttctaattataagaattattatctagccttttttgaagtcataatttgatcatg  
cgtcgagcatagtaagctaatttcgatttctttatagaatgtgtcactgatcaatttagacattggcgattgtctaggtaaaggagccttcggggc  
tgttatcggggactaaatataaaaaatggagaaactgtagccgtaaaacgcatacaaggtgtctaaaatcatgaaaatggacctttctgtcatca  
aagtacgaagctcaacttgtttctggttacgaagtattcctaaccgtgtattgttagatggagattgatctgctgaaaaacttagatgtatgctct  
ctactgttgcgattgaaaataactaataacgcagcaccccaacattgtaaaatacagaggcttatacaattgatgactcactctgtattgtgt  
tagagtatgcataatttacaattctgctaccggactaactaagtagatattgtgagaatgggtcattacattcaatctgcaaaaatttgg  
aaagatacctgaaaatttagttgctatatacatatcaggttttacagggactacattacttgcataatcaaggtgttattcatcgcgataaaaa  
ggtgcaaatatattgacaacaaaagatggaacaatcaagcttgcggatttcggagttgcaacaaaaatgaatgcttttagacgagcatagtgctg  
aggtagtccatactggagtagtacaacacattcggtaactatgtttgactaactatttagtggcacctgaagtattgagttgatcggagcaac  
tacttctctgatatttggagtggttgatgcacagtatagaattgttagaaggaacacctccctattataattgatcctactgctgtttgttca  
catggtcaaagatgagcatcctcccttcttctaataatttattatcagcgaagagtttctggctcaatgtttccaaaaggatccaaatctcgag  
tcgggacaaaaaactattaagacatcactgggttactgctcatcaaacgtctaccaaattcacagatgctattgacgagggtccaaaaatacaac  
gagagagttaacgaagataatctgaatcttattaatgaaaccacaacgcataacattaatccaacgttgatgctgacagacagtccttattcat  
cctcctgagccacctaataacacctccacattgaaacagagagtaagatttttgacgttgattttataactaactatttctcagaatgctgatgtt  
gggatgacgaatttcaaggactctaaaaatcaataacgatgtactggagaaatctgaacattttgtgaactttataacgattttaaaggtaaaa  
acactacttcaagttctacaaattcgactcctcaaaaagcagaaaatccgttagtggtgatcgggggaatgaagttgtggactatgtcaaaaaac  
gctcatcaccggaattattgacagtaagtggttgaatatgtttcctatgctaagatagcctgcttaataggtccattgatcttcaacaga  
ctcccaagcatcatagatatcttcaactggtaagcaaaaatgattatccttctgtaacgagatagaactaaaagaaaaatgttctctgatgttt  
ggagaaattcatcgaaacccagaaggacagtgagttcactgatgtttcctgcttcttcaattaagattcagggtcctcggaaagaaaaagggt  
tcggaacactagttttaaataatcatataattcgtggaataatgaggatgaagaaactgaggatgaaaatgagcttttcgattctatcgattctg  
aagtcgaaaattgaaactggagaataatcctactggataaacgatctcgattaatttctatttgaagatatttgaagggtgattgagaa  
aaaaccggaagatagacaacctattgtcactcaaattgtatgaaattacttctaaatttgaatgctaataataggctccattttaaactgaggat  
ataagctgaaggacgaattggtgaaggcgcagggatgctcctcttattgaaacgctgagcgaagtaacgatagcctttacagctattatta  
ttaaactcattaacacggtatgtacaactgaagtttctgtagctaatcgacaagattattatgataactattctacgttacacagattctgtttct  
caggcggattgccctgctgttaaagttctcctcaagctcctatccatgggattttcgttatgagagcggcttttcattcagcaaatgtacagagc  
atcgtcattatccctcaaatgtttattggtgttcagggtctcatgttctgttctatttctaaaggaagactatacaaaaagtaaagatttagtttc  
gtaggtgctgaaggactatggaagttacttagacaacaagactgtataccaaagaatgatgtctgtcactagctgtcgttctgatgttttagag  
ccgatgacaaaaagtagcttaaggcttagctgaggatgcttcttctaggcttgtttgcaaggctctgtgaaatattgttagcactgtctca  
gtcagaaacttatgtaaggaagccctcctgaatgaaaacatttccgaagaaactacgtattctttatctacctctgaagaaatgtaaca  
atgttgagtttattaagcaaatctatggtgccgttctcaataaactactcagaaagggtcatttaatcccccttttaacacataactcggaga  
tgcaaaaactaaaaatagtagaaaagagatacggaaatgaatctttggctactttatcaatatctgtcgttttagatagaaatcacaggaaaaag  
cggttattgctggagctatacctctattacaagaacagccgtcaaagacaaaattctaaaggaatttgcattgccaatcttattgacactgccac  
agtgtagccccatctgtaggcaatacttatgaaaaacaaagggttgaatttttctcacttctcaagatttgaattggcaatcagcttccctg  
gatactatatctgatggcttcagatgaattaaagagatacaacatgctcttttgaaaaacgatatgtgcatctagctcctcaaggttctgttc  
ggctcagtcgcttcaatcgctttagacggcattagtagaatatgtcagcttctcctaaactagcagcaagctacggctcagcctcaattt  
tcaaaaattaagagatcgtttattacacggaacggcacaaccgattacactactgaatgctttccaaatgctcaaatccatgtgcaaggaatt  
catattgcaagatgtatatcactcattatgatttgcctgatttaatccatcagcaagccggacaagtgattccgtgttagtacgagagttggccaa  
agatctcttaagacaagtgaaactctaatatcccagcagctcgtctatatcaaaacctgacatgccccaccgaaacggctgtcaaaaatcaa  
ctgtaactgtaactcttacgatcgaattgcaaacatggttacatcgcggttactatataatctgaaacttcaagcagctcaagtcagagat  
gatggagacctctacattaattatcacgtttccgtttatgacttctttataatgttacttatgtaaatgaatctttgaaatttcatgatgtatgca  
cgttaactttgagtaggtatgcatctttcattttcagctgaacaaaccgatttctactataaccattgaaatcaaccttaacatccagaggttaa  
ccttgaattattatggaagcccaacttgagtttaagtaatatcaatgagaaataaagtattacaatttaattgaaacttataattattattgtatt  
aaaaatagatataatttaggaattaatagtttttactctgcttatagaaggataatctgattacgcatatcccaacttcaattttcaataag  
gccttcgtttctatactagcctcgttttgaggacatctattgtccttttataaattttgatcttaattttttgtaaaaaaagctgtacatgttctaa  
atccccgtgaagtaataaccaatgcacaaactcagttcgtgctgaaaaatacaaatccaggatcctagctttgtctaaggctattgttttttttct

ttgagttaaataatattttttgagatgcctcatacagcgtcaaacaacattgaaaaacacagtcaatgtatttacttcttacttcaacaagta  
caggaacttttccaaagccggttgttgagaatcaatagttcaatctggaatcacgcttatatatttgggtgctgggatgctgaagattctagcct  
cacgaatgattgtacatcgttgacttagaaacgtcctcctggaattggttgaatacaaggatctataaacctactccacgatactccattct  
ggtattatttggaaacggaatctgtgttctttggaggcatcgggtttgacgaagataagaattcattgtgtggtttaaatacgcagcagattttta  
cctggagacccaaacgtggagaattattccagcgaagaaagtgaaccggaagtgaagtgatgcaggaacgtctacatcgcagcctctacc  
aaggatggtcatttatactgcgttttgggagattatgattgtatactgtggacaagatctgtcaataattacatcgaacagatcaacgtttttg  
acctgataactgagaaatgggtccacagttctcatttgccttatcattgtggtgtttacagatcaaacgtacttcttagatcatgacagtgtttt  
ctaaatttgcactgctgaaaacaataacaatgatgaagagaacactcgaagacagaaccaatttgggttcattactgttctacctcaactcaa  
acttctgcaacgttaaaccgcaacttattctataaagctgtacaaagtatctaataccaaaggaaacggaggagaaacagataaacgtgaagg  
atctaactcctgcttttactttgaggaacaagacataagtgaataattgtaggctcctcatgctccaggacttgccttccacgtgtttacatggt  
cggagagaatttggactttctggaatttaccagttctcgcaggcgttctgttgggtgtattcgttagatcgtgcaaacgtgattcaact  
agatacttgggtcttttaaatcatggctcgtggtttaaagtctaagtatgcaaaaaataaccagctgttatctttgggaataaaaaaaggaaa  
ctaatacaagactataatgttcgacaatcaaacacgataacatggtttatgttgagcttgaggcatatggtatatacgaacccaagattcca  
cattactcggaaagaagcgaataataggttaagctgtattaaccggagtaagtgacatggaaatttgcactagaacgaacccgtattcctcg  
cctttccaaatctgtacaagagatggccaacatttcagagactgttagatcaagcagccgaacagaatcaggatgccttccgaatgagccttc  
cgaacttggcctcaggttaacggagctaccctttacacctataaacagtaactggaagtgaatgttataatgccttatagcttccgaacatgctct  
acttctgttattactgtattgtgaaagataaacgaaacttacttgaacaaaaactgtgaatttataatttcttccaaacatgatgaagg  
gatggagacgttattccaatattgtacatctttgcacaatacgtgaaccgaaataatgtaaagactattatgaaatagctgtattgacaggg  
gcaaaggactgcagctacgagcattaaggaggatgcacgcatagaacagaatggtgtgagatccaacccgtcattttgccaacttggga  
aaatcaagaattacctcgtcctgatttcataaatgctagatatttggtaagtgttggcgcttcttccaaagctcttctgctcctaattct  
ttttgtaattatttgccttcagctcttctgtcagttacataaccggtccaattatactgttcacgttcttgcgttaataaatcttctgcttctcc  
cacagctcatcttgcaagaggttgccttggcttggacttagagacgtatcattttcatactccttaagttgtagctccattctcaacat  
ttggaaggagcaggttcgtaacaaggttgtagaagcgttctgtcacggactggaaattctcggaaaggaaaaatattagtagttcgtaa  
ctttgaaatgtatagctagatattgcttagggaatggatttgggataatagaatattgaaattctatgaatagtaggctatcattgattgcatt  
aatatgagagttccaaataaagcaatcaaaattgattaagagctttttctcctcaaacctaccatggtgaggttctgttgggtgcaga  
atcggcaggaatgactcaagagtgagcatttgcgtagttcttgcgaattccttcaagattcaacggcttttcagaggaaatgatcca  
tcgaaacaattgattctacctccaaggcttaaacgctgaatggattcctcctcaagttgagttaaacgacgaattgcagctcaacggtcac  
acttatagcggaaatagaggatattgtttaccttttacccaaatacaaaatgtttaaaaacctccaatcactggcagctcgaatctcttt  
ctattatgactcaaaaagcgaattccagcttctgacttggtttactaagtagaatgaagtacctcgtccaatgcgctatttatacaagct  
tcttatagggcactagtaaaccttgggtccttaggaaacgtggtatttccaatgttctatggctattatgaaggagaggattgatttggagt  
ctatcatgaaagattatagggttatggaactacatcagataatttctggtcactaacgatctcgttatgaacctcaacctcgcagtggtt  
attaccaaacagttactcccgaacggtggtcgaacattcaattatctttctacccttcttcttcttatattctacagcttgggtggaagttcatta  
taatctgaaattgactaaaatggcagacaggggaaggcgttaatcgaataactggtcctatgaaagctgaaggtgagctccgtattgttaaagg  
cattgacgttgcattcacatttgagatgctggaaaaatacaaaagaaggaaagatggagtctggagcgggtgcagaaattatgaggtcgtga  
atatgattcgagatcaaatgtctataggtgattatgcgttcttactgttccaattgaaattcctcatattagaggtaagtgaacggttcaatct  
ttatagctagaatactgacatgatttcaaggagtaatggaggtaactcgaatttcaatattgaatggattgaaaaggatcaaaaatacttcta  
agctacagtggtatgattacctagagctatttagattttatccattcattcaagagatgacacatagcttttactaacacaattttgtctag  
atttctcagaacctatccggatggaagtgaacctgcttatttcgacagatttttaacctactgaagattcttctggtggaccgaatgatccct  
actatgatccaaatcaaccaaggaaaagccgagtggtactcggtaggtgtacaatcacgatccttttaaaaggcctgtaactcttagggaa  
ttaaaaatgcatattaatggaagctttcacatagcttacttaacgggcacgacttagtatttccaaagtcaataaagatgaatgggattca  
ttcatcaactgctgaactcccgaaccagtgaaagtacaagaggcaagggagaaggaaaacaaaaggaaacgaagaagagagaaagaag  
gtagacgacgatgggaaggaggacaacaagcaaaaagaaaagcaaaccttatatcgcagcagctggagatgatgatacttcattaaacg  
ctattaagcaaatgaaatgaaatgcaataaaaaataacaataagtgaacaacattagcaagcgaaccttagaaaacgagaatttaac  
tctcataaactatcattcatctacttttcaatagattcagtaaaagctcatttccaagcttaactgtattttcataccggacgaatgtttgattccg  
ataatttcaagatcatgaattagaaatcttcttcaacaatactccgttaattgcttcccttccgaatgtccatgccagcagctgtaaaaa  
cccatactccaaattgtcgtcattagcatagataccccggggttctcagttgagtttattcgtaacatggttccgctgagccaaagcatata  
cctaaattttatcaatacacagcaattggaatccttccgtagctcgaaaaacttgatgtcttgagcggagctgaaatagtagagaatctgaa  
ttaccgaaacccagaatgagactgcttccatggagttgtatgtatgcaccaaggacaatcgaagattcttctcaggttcatgattctcaata

atcctaatatcgctcgcgatggatggggagcattcgatactttctaggatatgtgtttcaaaagtgaattgtcgagaattcctttcttcagga  
attttatgaccttaagcagtaggatagtaggttcgtaaaaattcaacacatgacgttcaattgcggacattgagtaacatgacaattagcatta  
aaaagacaagttaagttttgtaattaagtgaaggattaggaataataagcataattgggcataaagaagggggttcaagacagagaagttc  
tgaacataaaactgttatcctgagctggtgagcactgtggatgtgaatagaagatagtgcaaacagatacccgatgatcaaggaagaa  
cacatttcatctagaaaagtataaagtcgctgaaaagcagaaattgatttgccttctttgtaatgccagaaatgaagaatcagcaacttc  
tctgcttttcataatatgggcttgaaatttcgtttataggaaccaatggattcaccggctgaagatcgacgatgataatacacaacacaaa  
ctcggtgaaatgttaattcgatacagggcaaatctttgggtcaagtgactttccctacatcctgagccgttttcttcatgaactcgttgag  
tatactcttatttctgaggaactgagtcacaccaactagaaaaataagtaaatagtcgttcgttgcctcacaattctgatgctgttcgtaa  
aacacgctaagaacctgaaagagctgaaaacgtaagcagcgatgcttatgatgatggaacaaaacagcaggctgctcgataaaaaaacg  
aagaaagctgaaggtatcaggaatccaaaaaggtaacgtaaatggatcatcgtcagtaacttacggaataacagagaaaaataatgaat  
cattctttcattctcaagcttacaaggcatctcggctccagactttcccccatttcaaagcttgcgagggcattgaagtttctaataaggattagc  
aagtcgccgtttgtagaaagtgaagtataccctttaaattgatcgttctaattggattgaagttttcaagagagcagatgttctcgtatgatg  
gtttcaaattttaggagaatcctccgattcccagtaaggcttaagattttcatatttttaacatcatttcttcaaatgaaagaagttaagt  
gtttgaaaaaaggttttagaaaaagcactctagaattgctttatgtataataatcatgatgtaagaaattttaagtaaattaagcgaag  
aaaataaacgctggaagtaaacattgatgcatgaaaggttcttcaattattggagaagactctcataaaagtacagactgaacaaaaaaa  
taaaattaacaattaacgataactatgtacaaaatgcttttctatacaaaaaacagtaaacagacagaacatgataaaaccaaggaatc  
aaaaaagtaaaaattcctgaccactacggatgatgtttttagataaaattttaacaatgcagaaaggacgaaattataatataatagataatgc  
tgacaatcaagtgaggattcgaagccctcgatatacattttgagcagctgttgaagctctgttaattgtcgtaaatgccctttcaccacataatg  
catttgagaactcgtctaataatagctacatcatcagaaggaatcgtttatcgatatactagtaaacgcttgagggttccattctatcaa  
aaattcatcaaatctccattttctaaaatgctgttagtaaaaagtaacattggaagtagaataaagagtaatttgcgtacttgagaagatcagat  
atctctgatagcttaacgcaactcgttttttttttttttttttttttttttttttttttttttttttttttttttttttttttttttttt  
agctgcttttctagaagctgcatagagagcttggttcacattcagcaaatcaatgaattctaagagccgtattgagacatgctctcaaaagcatt  
ttcaccttaaaagatagggatctccggttcaattctgcaagcagttcctgaataattgttgaattacgtcaaattgttagtttcttctggtccat  
ttacatttttgatagccttgcactcagatgctcactagttcgtccgttgcgttgcggggtgactgttctccagaagccgaagatgctttgttgtaa  
ttgttgatagaggcgtcgttagtgactctcttttctattcttttcataaataatgatgagcggaagatgattggcgaggggattcgttctg  
aggagcctcgaactaacggaggccctgacactagagctgctgctcactcctcaaaatattctcaaaagtagcaaatcttctgtgctgtgctag  
ataagggagatttctgctttcgttggatgcttgttgtttttcattggaatggaaggtgaatgaagggttcaataattccgcacagcttctg  
ttgttacgtttctatcactgccctctttgtggaaggtgtcgttctgttagctggattatttaccagcggatgattcggagctgattcttctg  
aggcctcctcgttttctgctttaacgaagaagtgggtcaggccgtttctggggttcttatgagataaaaagcttctcacttctgcttgttga  
gaatcaattactcattcactcctgggattcgacagtagctgctcattcaatcctctattttttaccatcattaggagtggaagagagactacg  
atgttcagatattgaggagaggaatcaaaactgttaaaaaattggatcaatagaaaactcaacatcttaacttgtaccgctacaacatcatt  
agtttctactacaattttcaatttctactcagcaccacgcattcgcagctcttctctgattcacatcatgaacatcttctccatgattgaatag  
ttaattcagcgaattggggtaccattaccgtcgacaggataatgggttgtagcagctttctaccagccttctcaacaaatgtaacagtttaa  
cattctagtaagagatttcaacaaaagagtgcttaattggtttattttttttttttttttttttttttttttttttttttttttttttttt  
aaagcgtaaagatgaatcaagtaatatcaaaagtcgtttatataatagcaagtaggtcagtaagaaacgcgtccttctcgtaaatatctata  
ttgtaagctttcattaattcgttagatactaaaggacagaaaatgatgagttgattcaagccctgtaatttaacatcactactcaagtaactgta  
tacaatagtcattttgagacagtaataattgatcatcttcttaccacatcggaggtgattccttctgattctgcgctaaactagcatagtta  
taaattgcagacttctcctcgagagattcctactcagatatttctggaattcaaaattattgactttacggtccatcaattgggtttcttcta  
gctgtgaaaaggacaaactgggtgaagtcgtcacttatacctagtagctacatagaacaatattgaatttctatgactggaatccccttatt  
gaccttttgattaaataataaattctgtattgctgtaataatggaggatccagaggtccgaagaaaatggatgttctgaaactatgcatatt  
gtatataactaatacaactgtagacgagaaatgccgcttctgagctgatcgttacttaaacccaatataagattgctcataaacccagaatgc  
tatcataaatgtgtgaatctgctcgtgatgtatgtatgagggtttctgtttgctacacattaatcaagagcgaacagctaatcatggatttcta  
gagaatctttactacaggacagctgcttccaaactccaggatcggcgaatctccgaaaagctaaattcgtgaacagaccttcaagatg  
cacaattgagcgggaaattgacgtacgcggagaattgcaaaaatgtatggaataatatttagaacttactaacgagaaatccagattta  
aaagtcagcaagattttggtccttacaagaatacaatgactactggaagaagttgagaatttaagtagctgtaacaaaaatgtgcaattat  
caactgtactaattctatatctagcttttaaccttatctatcaatttgacgtcgaagaacagaaaaaaggttcagcaatacgaacaaaaaac  
cgcgagtcgattgactcaactctgcagagctgcagcagaatctcgattctgctcaaaatgaaatcctgttaaagaacagaaacaagaag  
ctagagatgcattatacagaacatgagttggagcagagaacggcgagaacaagtcgaacagcaaatcattcatgacttggctacgtccggttaa



agatccaaataagattgtgaaacttacagagacgcttaagaagcatcgggaaaaaggattctcaaagccaattttctcgcaatcttctgctg  
catatcccgatcttcaaaactggcacaacaaaggctcaaagaagagcagatgcctttcagcccgttgaggtaacgaaatacaagcaaata  
ttatgattattctatagagaactataatgaccgtagtattctatttctgaaaaactttatgctaactgtagcagctttctggataaaattgcaa  
ggaacccaatcggtaactgggttagagttgaagattgccatctcagatgcttacaagaagcgttcagtgacttgattcagatcttgcaaaaatta  
accctcagtcaggacgactcgaaggcgcggcagccatgattaacttcataaccattttttgcaataaaaacattatgactttttaactac  
gtttgatcaatcacaacaaacttttcctaaaccaaaccaaatctcattcacaacaaaccatgcaagtagaagttatcacaataaaaatgtctt  
aataaggcttaaaacgccgattgactttaagatgctgaattcgttgcttccaattcaattttgtgagccaagtcctgcaactttttcttttctg  
ctcgtatgtgaaacggtaaaagtctttgtgattctgtctctttctttgtaaaagctttcagcatcttcaggattccaacaggttgatgag  
accgcaacaacaggataaaaccgtctcgtcgggttggttctcaactccgaagtcgattctttcagtaattcttgtttgttaactcttata  
tacgattcaacgctttctccaagactcagcatttgaaatgtcagatcatatcttccaataacatccaacgaaaagtaacattataatac  
gaatcataagaaaacttacgttttaactctgatgattgtgtagtattccaaggaatagtggttgattctttgatgctgctttagaacctgtttac  
ctgcttttccaataactcagcgtaaatcgttctgctttaagtaacttgaattgaagggtatacagaacgaatcgtcctcctaatttcgag  
atggcatttcgtaaacctttcagtgtagtgaccggcacattactaaatatacagattttcttcaggatcttcgctgtagctttaaataata  
ctttgagcttttcagaactcagagtaattctgagcttaacgaatccctttcttcaattgtccataattgttgtaaaggaagttgagagcgaa  
gactatgtagaagcggaattagcagatgcttataaaagtaccactagaagactaaactgggagaattatcaatctttacaatgtac  
gtgttttataataatcagcctttgttgacaagtccttctttcttgaactgctatccttttaaggagacctcaaaaaataaacgact  
tggtcatgcattaacggtaaagtagtcaacttaataataaaaatgaaagttcagaaaatgaaactgattaatagtagaatgtacagcggt  
tttggtgaattagagcgtcggtgattccctcgtttgccttcttataaattttccaacgctgtagctgctcaattcagcttagggcgctcc  
gactgactttattttttaagaactcgtccttgaagcacatctttttacatcgtctaaactgaaatgtagctccggagacttgaagcgattt  
atggaagaagaagaagttgaaggtccttagaaccttgcggaagtaaatcgtttgaaatcatcaaatatattaatgtcattcaagagagagg  
attgttctgaactcaggtattcaaaatccccattcgcgtagggaccacaaaccggtcttagtgatcaaacggggcttttagggagttgt  
aaaagcctcttaggaataacacttcaagcattcttctctttttgatcagatgccttgctatataagggtcctgggatcatcattgtttgta  
gccaagctagactccttttctgtttcgtgtagatgaattcgtcgtctttccctgctttcgaatcaagttttgatttcacactcaatcagact  
ggtttaggagaaaacggttcttttctgtctattttaaacagtttttgccttaagagttccgaagcttctttatgagctttgatttaggcaatg  
atgaaacaccgctcaaatgttagtcacagctgcttcaagtaaggatctttgttagaattagcatcaacataaaaatcgagaaccagag  
agttcaactgatgattgataatggatagaaactccactctagattcaaatcaaatcaaatcaaaagacgaatagcgtgattgtagctatga  
gttttctcagctttaaactaaagatccaaatacctctgatgaaaaagaaccaaggaagctacgttaattgctactttccgaaacctccagc  
tctttgacgaaagtaaaatgataaaaagattgatgaagcaatttaaaggaggcctgtgtcgaaaagtggtatagtagaataatgaaact  
ttttgagttactaaaatctttatcttataataagttctatgatgtctacggccacacactaggcgaacaccagttcccgtccgatcactgc  
agtaagcgtcagggcctgtagtactatggttgagacaacatgggaatccggggtgctgtaggctttctttgtgctttactttttcatt  
ttgctttcttttaatacgtctactactgttcttgaaccggtttctcagatagaattttgcaagcttctttacaagtacaaaagactaattac  
aagttcaatgaaaagaatggaacgatcgtattcaattgcaattaagaataagaataataggaataataataaagaacctagtagatccc  
aatgatctcagattacggttcttcaatgcgagattgaatgatcctttctattgtccactttctcgtcatttccaattcatattgatacaaac  
aaaggcatagaaataagccttcatcggataaaaccgcttgaatgtccctttttcatttggtgacttcaatcggaaagatgaactcatggcaa  
aagaaaggtaaacaaatagcattaacttgatggtaggattgctcgcagctctatttctcgtcgtagttgctggcggaggagctagtgatc  
atccctttgtgatctgggcagcgttagcgaaccggttttctcagctggcgctcaaattccattccaagacaaaacagtaattgtataaaa  
gccacagcacacaagatcaacgataaaaactccagcagctccaacacatccaattaaggctccaattaagactggaacacctccaattacgact  
gcaacacctaataatctgtgcaacagttctgtttttgacagcgagtagaagtaagctactttttgttagcaaatgtaacggcatctttcttt  
ttttatataaaatgcttacttacaataaaaatagacaaacaagcttgccatatacacaagcaaggcctaaagggtggaagaaggcccaact  
taatttatcgtccgaatacactgttccagcaagaagaagttgaaactgtatgaaattgctaattgtacacatcaacgaaaagaagaatgttg  
aaggtagcgtggcttctcagataatgacaagattatcagaaaagcgaagggaagttgtttaaactctcctcatagcttttcttatacagg  
cgatggaatgttgatccattcctggcggtttctggctattgttagaattgaaggaagttggataggacgattgttgatgttctgttgatcca  
aacaagaccttctcaaatcaacattgtaaacattcagctgactgtacgcaggagggtcgttgaatcgaattagctcctttccgacatcct  
aaaaataataaagagaatcaatgtaataatagcaaaagagcgttaataaaagctgttgatccgtattcagatgcaaaaattcgcaaatgc  
aaaactcaacagaagtagcagcaaaaactaaagtagctctacctggtcattccaaaagctcaaaaataacgtcaaaatcagcccaattggcag  
aattgaagaaataaaaagttggctccagcaagaatctcagatcactacgcaacattttgctcaggatagtgatgggttcagttacgctatct  
tatagcgattattgtaataaatcgttgaaagatcgtttgagtcacaaattataagtaacaaagttcgctaatttcgctttgtttacacctgtaa  
acaagcaagatcccatttctatgaactgttgaaaaacttttgcactgaaagttagtaaacagcctacagcaaaaagtagcctcatgggtt

cttcaggattaaacataaattaccttttgaactgaaggaactgtctacggccatacataggcgaaaaacatcagttcccgtccgatca  
ctgcagttaagtgaaaacgtctgagggcctcgttagtactatggttgagacaacatgggaatccggggcgtgtaggcttctctttttctg  
tgttctcaacaatgttcacgtaaacacaactcggcgcttctcaaacataatcatggaatgattgattacactgagactgcaaggaagaaactg  
aaaaacacaaaacaaagtacagaaatagctttataaataaacgaagcaacggacaatataatcttgggtagatattctgttgaa  
actgattgaacattggaactgttggaccagctcctcggaatcttctgtaataatgaaatacatcttgggaataaatttgcggagcacga  
tttgattgaatggatcggggtagctgtagccgttgatacaggaggaccatacctgtagagttccgaccatcattggattcatagtagcaaatt  
gattgatgtgaagagctgaagggttattatcttctgctgcctcgtaaagtattaccgactgctggggaggcagctgccactaggattcat  
tccattatcgaaagattgttagggaaagaagctccgaattcttagcattcaaatgacaaacgggtaactttagggttgactcagcatttgt  
gctggatacagggcgatataaattgtggctttgaaacattgacgaagcatctataatggggttctaaataaggcattcctcagggcaagta  
aaggaggtaaggagttgtgctgtcgccccgaggctaaagatgccaagaacgcaagggtgctttaatgcgccatatacctgttagttgt  
agctagttaaacatttgaaccttttactgttaaatagatctagtgcttaaatcttactgttagcataatagccatttactctgacttctg  
tatcgctagcatacatttctgattgatgtaactcagcacatctcgaacagatggctattaattcaagcatttgtttattctgtcatgatcctgt  
aaattgtaccgacattactaccgcttattcatgacttttttttgggtgactgcaaatgcaacttcaaacacaataatcgtctatgta  
gaatgaattatatacaacaaatgataaaaaaaaaactataactgaaactggttaacgaaactcaaatgaatcgcaaaatgtagttcaat  
ttacctggaatgcttagaccaccagtgctaataattggttcaattcttctctgaaacgtagtggttttaaacagcaacaaagtcagcag  
gaaagttacagttctgtaagcaagcataagtagcttctggttactaatagaaattgaaaacaaaggtgaacagcttgttagttgaaataca  
gatgcttaactgaagaaaagcgtgaagaagaatgcaaacccccgaggcttatatacaaaacatgaaatgaacccaatctgtgtttca  
tagaaataagaaaagactagttaaaggagaaaaataaagattcatttgtattataaaggataggagaacttaagataggttgaagactat  
ggatatacagatcctctatacacacacttaagagtaaacggccaagttgaaatgaatagaattatagacatattcgcgaaaaagaaaat  
aaatagataattttaaaagaatgtacattaacaatgaaggttctggtctatagttcattttatctttcataaaaaagcatataagctccacct  
tagagaccttccatgtaacctcgagacaatattactgatgataaccaccgagcttcttactcctggtctgtccagactctggttttc  
agttgtcggagacatagacttatccgctggaacatgcttgtgagacaatacataggcaacgtaatgaccgtaattaaagtcctgaatgtgcaa  
caatacacaatagctatatttattcctttgatgatcgtaacgtaggcatgacaaactcattaatactacttggcacaactgaacgaacc  
agtgattttttggatcgcaactccatcagctgaaaaatgatgaaacctttcaaatgaatcacaacacaggtggaatggggaatcaat  
caaaagtcgctataagcttctcagataagtgaaattcatagaacaatcacatgacttctcagtttcttgcgatacactaccatggttag  
agggggacttacaactcaactcagccacaagattcacaagcaacatgtgtcgcggttaactctcaatcgagtaagtttcgtaacaa  
tcaaacacggaattggctcgttacagacgcaccgttcgcaatcatcactcgggaaaattaggagcagatagattgctgaattgtttgtgacc  
gacgagaattattagatagattactcaacctgctgtaattttgaaagatgaaccaccatttgattttcatcctcagcaggaacaccttactagc  
gtttcaggctgtttctggtggaatcatcagctttttttctgctcgggtaacaatcgtaataatgatttaacatctggcgttctggtgacc  
tcttggatcttccaagcgagaccgagcgcgcatgaaatcgatgacgcttctaaagatttgaaattgcatgaacagacaaagagaaa  
tcttggtaggtcgtagctttgtaacttcttgaattctacataaaatgatacttacaggcgacctgtaataaagaatcaatcaccgtacg  
ggcaggtcatcatctaagataattgaattatcacattcatcagaagagactgcagattgtccatattgacaataatgaatattctctcgtg  
ggttcatcatatgaggaaatgaaatggcaaggaaatgtaaggcttcttattaccgatttgaatccttatgaaacgtaacagtaacttct  
gacttgggagttttcagcaatgttatcaatgttaggctcagaatcttaaaagcggctccttactcgcataaggagtggaagaaatgatagg  
ggaatgtatatgcaagaggcagaatcagtaacttctgaaacagccccctttataggagtaataaagatctggcagaaacatggttctac  
ttgattgatgaccattcgaagggttccgttttgaatgaccattctcaggagaaatggttgaatctgactggagcagctgcgaccattatt  
atcggcttggtaacttcttctcagtgattaaatcattgagtaagtaacttaaaagttcagtgatcctgttgaatccctcagaaaactgag  
gatgacgatatcgaaatcgccgaacagaatcctggacggaaaaacgggtacggaccgtctgtttgtagaaggattcataaaccttacgaa  
agcggaaagcaagaggattctaaatgatttccgaaatataaacttggatttctatcaggatggaaggatgcccggtaatgagtcagtaaggt  
attcggatgacagaaaaactgtaaaacagaatataagtagcatgttgacccatgttttttagccctggttgaatgatgtgcagcttggagaag  
gagaggatttgggagaaatgcttgaacacgtggatgactttctgagattcatgttgaatgaagcatcttgttctcagaagtgaaggta  
acaagattgatccggatgaactgagaaacgtctgaattaccatattctttttcagacggaaggactccaagttgcatgatacaaaaaaca  
ttcagtgtaatgatgtcacaaaaatgaatgcttgttgttttctgtagtgagttagcgaatgattaacatcgttggggcacaacaaaagatagc  
cgagttggcgagagatttaattcaaatcttctcgtccttagccaactgcacaaaggagacacatgtgttctaggggtcacggagagctc  
gggcatgttttgatatacagatgttccaccttttcaaatgcaagcatgattgacctgtaagtcgtctccttctgttaggacagctgggagg  
ccttctcgtgattgcatgataaggcctcgtgtgttcttgaatcaacagaaactgttactgcaagtttagacaaagttaaaaaatcg  
aatataagtttagagaatcaagcagtagcaacccccagaccttctatacgtcgtagaaaaaaaagtagcaggtatatactttttagaacc  
taatgatcggcacaagtttctaagaaaagaaaagtagaagtagagaacaaaacgaaatgactgaaacgaaaacacaacactataaccgat

attcgccaaactcggcgaatttcgaaaaccagcggatctaaaagaaagaagatataaagaaactatacaccagcaagcaagcaagcaacc  
aaaagtatgaacaaaaaatcagagctctacgagatattcctacaattcagtttataaaatagagcaaaagtatggtaggtacagtaggtga  
acgatttaacctgacagcaaaaagcgcactcagataaatcgtcttcaagaaagtaaaacaagtagccattcaaagctctttcgccaaatt  
gaataacatgcgcgaatcgcaatcgaataaggaacgacaagttaaaatcgttgctagcaaggacgctttggacgaaattaactacaaaa  
aaacaaaacttcaaactcgccacaggaagctccaatttcctcaacaattcactgaaactactcaaagtagtaacaatgagtggttgtagtag  
tcaaacagattctgctattataaaccttatttagaggtagaggtcgtgtttaaagacgcgtaaggcaccttgcaattgtagattaaggttttgaat  
acagtaagggttagggcgtgtgtttgctagattgaataaaggcgaagctcgttagaacaagcatcggatcaagaaattggaagtaaaaggca  
aaagcattgacatccagctattgagattaattatttattgaatggatttagtaatgacaatatgaaaaggtatggagacgatgaagaggcacctc  
aagtgaacgtacaagaaatgaagattaccaagaataccagcgtatgtgaacggcaggaaggcatctttggaggaatcaaggctctggag  
ttgtaaatcattatggaccttctgcacctggaacgtgcctcgtcctcaggcgtcgtggaaacacagcagccaccggcgatcgcaagaa  
gcagatcaactgcaggatgcttggatcgtgtggtattcaattaaagaagaagaattaaatcttctacttcttctatgatccagcttctaaa  
tacatttgcgcttctactgaagatcgatcgaaaaagtcgacttttgaattcgtataccttgatcaaacagtcagcagcattgtgagcttacac  
cgttaaagagatggatactgatccacgcgctcatctatggcagtgctgactacatggccaattgttgcaagaatgattgtcgaaagc  
aatcatcgtactgcacgccttgatacgagaaattatacgcaacttgataatgttcgccaaccttagcgaattccgcttacaaggaatacgagagc  
gaagaacgaagacgcgctgttgaacgttcgagctgagcacgaagcaagactcgcgaattaaacacaaatgcaaacagtgaaagggg  
atcttccagctcgtgtaaaaaagaacaaagctcatcggctcgtcgaaaaaatattcagaagatgctcagaacaggatgacaaatgccactgca  
agtattatggcgggaagtgttacttccggtggaataactcttggatggccacagacattaccccggtaccctgccataggaggtggt  
tttggaaatcgtaaaaagaaaccaactcaaaaatgatggctcgtgatggaacattacctattcaaaccgaagagaaggggtgcattaccg  
ctcgcgatgccttagcgtattggaatggatcgtgaaggtgctggacgtatctttggtagaggagctcgagcgtatgagcagcatacattcgtc  
taaaggactagggacttcaatcgtgcattgattttttctacgggagtggtcatgatcgttttgattattctatgaagatgggggtctgtatt  
tgcaatggctttttgataggtagatgattctttaaattgttacgctagtttctgatatataatgatatatactatttttaattatacaatgat  
tttgttttaattcatttcttgaatggcggtagtgtagttagaatccatgacatttttctagaagatgattaagaattcttgttgtttt  
tgctgttaacttattaaataatgaaatgcacttctcaaccaaggctgttgatagatatttgagtccttcttccagcataaattgcttcagatcc  
atccaaaataaccttagatccctactctgagattcagtcctcgtatgaatgaagagcacaggatcatctgaaaattgtcgcataaaatcatgtt  
tgattggaataatggatagcttcaataaagctgaaatctcgtcaaggacttaattcgttttgattcatcagttggcmetaaatgtacgaat  
ttgggattgttttaggatcgtcgtcattaataaaaacatcgaataagcaaacggcttagcggaaactcattgacgctagaacctcgttaacatc  
tttcatctggcctaaacaacatacttcaattcaaatgacaactttataggatccatcggttccaagaaccggttcatcaactcgggtattctaggaa  
agtagagctctatctgttcaaaaagctacaagtaggttaataataaaaactttgtaaacctacgtccttaacctgtgtcacagttaatta  
aacgcttcttccaagtcctgaagtcgtaggaaactatattcaagttagaatgtgtcggctagaagagaaaaaagaaaaaatttttaaaccttaa  
cttactttgatgactccatagagcagccacaatagccggacgttccctctttatacctaaaagattggcgaatgagctggataattgtacc  
gttcaggctgttcatctggatataaaagtatgctattttcacatcctgatctccatttcttttattttgagctcattcgccaagttggagccatttgag  
agcttattccactctacataaattcttctggatataattctcagagcgtacttgaaaagcaatcttttaaaaaactgtaaaaggtacttc  
gtccaatcgttcttctcctcgttccctttgtctgttagtccattttaatcaaacatgaatatttgaacatacaggaatcaatcttctccat  
gaattgtccaagaaggaacagaaagagaacttaaatcattaggttgagaatcattgttttctgaaatgtttgaaaggctgattttctagggtctt  
acgaatgaaaatccgtattgctcgtctttttgattgacgactaagagaatcctgcaagtcgaagccttccgtacaattaatgaatcaaacgt  
ttctcaatttctgtaactcaacatattgacttcttggatgtctcctcaaaaagttttcaggaatttcaagttctatgagccggatctcttttttag  
ttcacctgcttctttggcatctcgttcttattttccggttaagattagcattcccacatgaattataaaatgaaataaaaagtagcaccgaattc  
gctggttcttcaaaaatttagaaactggaaaaactgatcgttggatgatggtatttaggtaggaagaactgggtggtgtagtaggtgatccat  
tttctttcaaaagttgagaattggcaatgataatttttttatttctcggaaatttctacttttttgataccatttctgtctaattatgatgg  
ttaagtatgatcaggtgacatccaaaagctggtgtcttctcagtgcttgggacgattatcccaatgccaatgcttctttaaagaaatttaca  
actttatcataaatgttctactggaatcgccttcttcccttttaattctcaatttaataaagtaacattgctacttgaagtttctccatgaaataag  
cagcagaagcatgagcaaacagctaccaacaacatgtcgtcaaacgcaagcattgaactagcaggagctgagttaaaaagcaagaattatgc  
aaaagcagaggtcattataaagagattctgcaaaaagatgtaaaagaaagatgagtcctaattaacgagcaagaacaagcagatggcggctt  
gagtgatctctatgttctgtaaaagatgttataaaaaagcagtggtttaaagaagatgctaacaatttagtcgtcatgaagatttagctaaatt  
cgtgcaagaagttagacccttgatgtcgaattttctgaaagccaaagcagcaaaaatcagtaaggctgaaaattgcttccagaattgttctaac  
aaaaaactagttcgtacattgattgataattttccggtacgaaaaactccttcccttacaattgaagtcacgaaaaagctgtagagaatgggct  
atcgaaggaaagcgaacttttctcgtcaagccttagacacaaaactatttctttatattatgaaaacagcttaccacgatcgtatcactgg  
ccaatacccttcttttgaactcaagaggatggacgataaaatgctcctcaccgaagttcatttactagaatctagagtttcatgcccattcgaaa

catccctaaagcccgtgcttccctaccgctccagaacagcggctaataccatatactgcctgctgcttcaagccagcttagatatgcaaagt  
ggtatcttgcatgctgaagaagcagacttcaagaccgcatattcttattttatgaagcttacgaaggatataacacattggatgacttgaaaaag  
gctctttctttcaaatatattactctcagatcatgttaaattctatatctgaagtaaattcttttaacaggaaagcagcgtgtaaaatac  
tctggaaaagacatagacgctatgctgctgtgtcaagctatgaaaatcgcttcttgcgaatttgaaaaggctctacaggactacaagtta  
gagttggcctccgatccataatccgctctcaccttagtactttgtatgataaccttttagaacaataactcttctgctgctgaaccatacagccg  
catcgaagttcacacattgccaactgattgggcttctactgtacaagttgaaggtaaacttagtcaaatgatttagacaaaaggttttacgga  
atccttgaccaaggcagtggtgttttaattgtttcgatgagcccaacaagataaaacttatgaggctgcttggaggctcatcaagaatatggga  
acagttgtagatctttagattgaaaacaagctactgcttactataaaatgtattttcatttctaataacccaaataaataatttttattcaaaa  
tttttcgtagaggcttttagtgattatgacaaaaaaaaatgctgcacgtattgataaagtgataaagttcaagaagtaacccttcagacctc  
ctttcttttaactgacagcagcagaattggtatctactgcttctcaatgacaaaccattgagggattgtcttctcacgacctcatcatattga  
acagctcgcaaccattttcgctttaaatacgcaccaaatcaagagtaggaaaataggttcattcattttgatggttaaaacaactggtactt  
tgtcaaatgttactgtgctcactctcacataagaattatcggaactttcgaaacttcgaacaaaactttcaagatctggagtagggataccatt  
gatggcagtgatgaattgagcgaatccaagtcattgatccgaggtgagcctctgctgagatttgacaaaatacattagatggtagacctc  
actttgaaggcgaacagctctatgtggagctgaattgtgacccccacataaattaccgggttgtttcagttatcggtagggaaagtaggt  
accttaattttcatttcttctccacgaagaatgtccatctcaatttctcagtgcttccagcttccgatctctggacacgggtcaggggtttccgtt  
agcagttaaaattacatctcctgctggtagaatacaggggtgttcgcttgcagctgagtaatacataaagagttgatgacgttttctgttcagttt  
cgattgtgaatacgttccgagataatccatacttctgcatgagctaatgaatagcacggaattctacattcagtttctaatatgtggatta  
acgtcagctgtaatcgtcttaaagttgacaagacgacaggcagtgctagaccaagatgatattcacatcggtaccggtgctgctgctgccc  
taatgggtaagccaaaggcacaactggccctgctcatctgttagaacaccggaccacattgagatcccaaacagattcaatggttatcga  
ctcaaagttgacagctctgaatcgtggcatcggattaggaggaataaccatagtaatgacatcagttactgaagtttctgtagcagcactctaga  
cttagaattaaaccgaaaaattacgttatctcctgtgaaacataatggttgcgaacttagcggcttaataggagtttcccaacagttta  
ggatcatatataaaagttaaattttgagttgggtggagatgtaaaacctcagctggaattgtatagaatcagcaaccgtgatggtcaaatct  
cccagcgcatacggcaggtgcatcggcttgcacagctataccattgttttatccaggactagagcagttcctgttttctgcttttctgataacca  
tcaagatgaatgggcatatagtaagtattttcgaagcaattattgatatcagcagtaggaccaaagttctgcacattaagtttggaaatagaa  
gtggtgcatggaatattaggcttgcaggtaacggatcaccaagggttgaataatccaaaaaccggtctcgtcatttctactagctaaagcga  
agcttagcccaatgacggtcaactcaatgatatccgtaaccagtgagtttatcatggataaacgatagcccacagcaacacgagaacggt  
caggaatggtcttcatgacattgatgaaggtatctaaatcgggactggtttgtacgcagcctcaagcaaatagcagtttctggacctcca  
gacggaaagaaccagcaggtcactaataaaaacgctttcactggcaaggcatattggcgagctagttggtaggaaagattgtggaattttgc  
accacagacttctacatacctgtcaggagcaatatcatgacttctgactcggcaggtaacgtcactgtgctgtttcctcgttgaacggttaaga  
acaatgtctggcctatgattcatctaaatgcttccaattctatgagatcaatcaagttttgaattcaaatgaagaagaatcaccttctg  
caactgttgtgagaaggtcctccggaagtaccgtttccacgactaacatgctagtgaccgggaaaaggcctctaactgttctcaattgcc  
gtatctaactcaagcagagcattcatcaaaaggcttgataaaaactgagttgaaatagctctagtaataggtttttattttgaggcatcg  
taaagcacgcaatggcctatccaatggtaaaaagtagtcagtcgctgcaacctgtggccaccgcttgaagcaacgacattaccgcttcttc  
gacgacaggactaccactagaaccaccactgcattcgcagcagcctgaatatagttgggttaaaatcacagtacgttagttccatagtcgg  
gcacattacgatcaacacgggaaatccaaccagcagagaacttaattttcagcagcatattaccgataactcgaatttctgttccacttttgc  
caaatcaggacgtaattccaattgttcgacattcatgtaacgaattttttgggtcaaatcgcaaaaatccaaaatcatgaactggatcacgata  
aacggggtatacctcacttctcatggttatccaaaattgcatgtccgataaagggaccggcacacactacatgctggttggttaacataaacc  
attttggcatccacgatgaatgactagcttctccagtgccagattcatctgtatcaaaaggaagcaacctgactgaaacgaatagaaacgacgct  
acgaactcacagcaatgattcttccactttccacttctgcaagatgtgaagatggagctgtctccacgagttgattctctagttctgcaggtt  
cataagaaccgttcttggtagttttcatcattttctgctaatggaatttctcttctcttttttatagccatactaaaaaaaaggtaag  
agagaactgtgaaactttcctcagcgcgagaacgaaccattttgctgatcgtctacgttacataaattatcttagtgaggtacgctgcatggt  
tatgtgaactaaaataataataggaggaagatggaaagaaaaacaagattaagaaaatagattccaggttttattcaatggttaatttagt  
gtacgttttagttatcgtccattcataaagttatctcaaaaatagagttgctgtttaaataaaaaacacatactcaattccatgtaccaatgttatt  
gtagagctgcaagagtcggtgttaaaagctagcttccatgctggaacaagatccaagaagaaggggctttataatagaatcattgtag  
ggaaaaaacagataaatgagaaaatgctataaaaagtagttgagtttcagacattctttgatattcgaaggaacgaactttggaatcaat  
tgaacaatctcatacatatcataccgttttagctcaaaagaaagataaagcatgattggaattccttggaaaaggctcagctccgatacggat  
aaaatgcaaaaattcatctatcgacatgccattatgctggcatacctccacaaactggcggtttgtctacgattagattgtcaagaccaagacg  
gtcgaagttcggatgctgcttctcaggcaaaagtcgctgaaccgctatcatttctcaaaaggttagccacgtcataacgatcccaaat



ctcgtcctttgcaagctgcaagggaaactcaaggatacgtcccttaagggcgtcattggcgttctaagaccggcagtgcggtgacaagagt  
ctttcaacgttcttgacctgaagaaggagccttgatgctgaccagtccttacgagcgaagggtcaacggcagccttctaattcccttc  
ttgcctttggagagtctctgtttttccaacagccattgtggagaagttggttcgtaaaatttgggaattgtcaaagttctatgtgactgctatg  
gttttctaggttagggttaatttgcgaagcttaaactgtgcaacttttggtagttaccacataactttgttacttcaggtagttttgtttgta  
ctatagactgattgtaaaaatacatatataatagcagtttaaggggtatccttgagcgtataagatatcgcaattgatatttattacgacgactg  
gcggttttttcttagacatacctgaaggattgattccagtttttctgtagatcagcgcataatgtaaatgatattactaacagtatataaagaag  
tagcttcataatgtcattatcgtctcaacggtagtttttaggtacataataaataactgcccgtgaactgttaattgactagatcctttatgta  
taaacagtaaatgaccataagagtattctctgatgctgtaataatattagctctatcttgacagatagcatgaatcttaattcaggatagcattaaa  
attatctcatgggaacgttctattctttatcattaaaattttcacgagaatgaaaatattagggttttcgtattttccaatcatttagcgtcg  
ttggtcgaacattgtgaatataatatacaaatgtgaagaattttcaaactgagtgagcaggactccggaacgatgaattgatgaggaaacggc  
gggctggcaccacaaggttctttctgagcccacagttttgtgataattttgtaactcttgtagccactattggtaaagactgcagcagtt  
aagaagccaaggagagaaatcgcgaaagtcctccagctagcgtctcgttttaggaattggagatcgtacaaagaaaacatttccacaactag  
agaaaccatttctcaatatggaccacggccattatcaactgatagaagagaatcgtggataataatgactgtttccagtgcaatgatgt  
gtcgtatcggaaggaaaagtcctttgattgatcagagtcctgatagggggaggtactacaagaaaatcctgttcaatgcttaatagt  
ccctgctttcagtaaaacttaaaatctttcctcctccgcaataatcatatcacgttgaggtatagcaaagggaaactaatctatccaaga  
tatgaacgacaccttctgaaccaacatacagcgttttccattgtaagaaagtcattatcttaatatcgttgttctcattcgtgctttcaac  
cattatacttaccggacaaggttgatagttccagaagtcgaagaatcctcagttgacccgaagtaatggattccttggaatgtactcaag  
caaaacattttgcatcatctcaaatatgttctaagcctttcgtaaaagtcctcaactctgccatgcatctttcaacaaaaaccaagtactgt  
tgggatcttccaagggcagtgaggttaggtatcgaatactcatggaatctcagcagtgaaatgagtgcaaaatgagtgaccagcagta  
tctgtagcaactcttataaagcactatgttcatcatggctttggcattagctctgataagtaattttgtgacatctggcatataaaagtttcc  
ataatgataatcgatatcagagctttcacggaaagcccaattcgtaggagcaaaaatcctctgtgagatgatgtatccacagcaatattct  
ctttcttagaaatttttactaaaccaggttctcctaagcctatcagatatttagcggcgtaaacgtaatgacttcaggatttagcagagcag  
gtaagacatgtatagctcattgcggtgactatatacaaaattatgaaggagtgctattgaagtataagatttttgggcttatcgtattgcaag  
gtataatagggcctttcttagagtaaaatcttgggtcaacaacgtcgtcagcatacactcgttcatggatgacagagtggtgattgaaaagag  
ttttacatctcagtggcataaaaagagtaaaaatagcttagttgggtactgtaaaagattcacaacacatccgttgcggaacaaagagag  
tagttgattcactcactaaccaggcagaagataaacgatagaatagctgtactcgtttcagaacttagtattccaacgatgtcgggtgaa  
ggcgaagcagttgatccacaactggacaacaccgctatcggcacgccagttgggttgatgatgtagacatcgtttacgagatcataaggattat  
tagactcctctctgtgttacttttaagcgattgggtcggccatcggcggcttgaattcagtagcgaactgtacgattcaaatcagtcgattc  
aatatggttagggccacactggatcaatcgtgtctctacgaaatgcttattaacaggagcaaacagcgttaatcctttatttcgattaaagtaag  
gaatgaagtttctgctgtaggtgccttataaacgaaaaagttgggactgaagacagtaaatctacaattgacgttgaccgactatgcaatg  
cagcctgtgctgaattgaaaaaagaataaagaaaagcatatgagattaatccaagcaccattgcatttcttgtaacaatgatattgtaattg  
tgtgtagttgaagttactaggaatatccaagggatcaaattaggacatcaaccaccacaaagggttatctttggctttgtttatatttttt  
ttctaattttgttacgacaaaagctgtacattgtcacccaacgaaattcacactcaattgcttgaagcaatgtctacctagtcagaatagtt  
agatgatcctgtttatacaattctttctttattttttgttacaggtctatccgacagttatttcacttggttaacaaaatgacgcttcttattc  
tttcatggaagtggttcaagttgtttatgcttttggtttaattcgaagctatggacagttttgttggcaatgctcctgcaattgcaat  
tggttctataaaagctcaacttgaagttttgttatgtgaaatggatcgaatggcttctttctattttttatataaattccaagatcttttat  
tttcttttctttagcaaaagatgatccttctgtttgtacatactgtttcattatacattaattattatagtaaaactggaacgtgctgctt  
aaggctttaccaacaccactaaatgctgttaagaatacgcgttccatttcgcttagatgctttgtcaacaataaaaaaatcttgaattacc  
attaaaagcatattgggacgcttctttagaacgctactgcgactttatcattcatcaaaaatggcggcaatgacagatgttacagaccctactcc  
gttgctatggagttgggtagtgaaaagatcacaattgtactgactaagattgcgtagaagcattggaggcgttggatgttcttctatgtccta  
gaagctaagcgtatggttactaacaatttctagttgctggctcattctgcagacttactctgtcacgttccaattcttaagaagatcata  
ctttgggaaactctctcgctatattgataaagaagtaagcgaataaccattcattatgaatacctgctcaccactcattagccccgaggtgaa  
tttggggtactccatccctcatccctcagaagccaagatgaatcttgaatccagacaattcgttaagtacaaagctataaaaaaaacacaa  
aaagtgaaaaagaagatagtggttttttctcattctcatcgtttaggataaccctttgactgttcttttgatttttatatgaccagtgactaa  
ctttcgttttagcaagtaacagcaattgaagcactaaagaaaggattagatgatttaattggatctttgcgacgttgttacagactcttcaat  
aaggactccaggatagtaataatctatgagattgatgcttgatttggctgtgaacaacaagctcatgcgttcttttggatgctgtaatttaa  
aatgcatacagcgtttcaagcgtttgtgttatgttcccaattggaacggtcatttacttttcttgacatatataattatgggatttcgggtgaaagcg

gctatttaggaatattgtaattcattttcattgaagttataaaactgtgaatattaaaaattattctttacacgtatccattctacttctaatagtat  
tttaataattgtatcaaaacaataacactataactagataaaactacatacattgttttctacaatcacatctccgtaccttcttcaactcgacg  
accgtcgtaaataatacaacatactctcatggtccatccttttctatttctagctgttataccctttgtacattgggtctttatacatctttcagta  
ggaagaccaaagcctgggttggttcgtaatgatcccaatgtagtttggcacgatgcaccggagtagtagttgcttcttcttctgatttttgacc  
aagtggttatgcaacaccaatctctgttttctcaatttaaacagattacaaagatctgttcatgtaggaatccttttttaggaccattatc  
agactttctggtgaaaaatgtacaaggtcctctaaagaaccttcttctgaaataaaagatccagtgacttggcgaaacctagttattgtatg  
tagcttagcatgattgttattgcatccaggtatactgactgttagggaccttctcagaagagctgatgttctgttgcaatgggtccgttatttga  
aaaattagattactcttgaaagaaatcattctctggcaccctttgttcggcttctcactttcatcctatgagctttgtgaaattaccg  
ggagcatacgttattgcaatggtacaattcctgtgcaattctctatacgacaatattggatggtatagcacgtatgtattcctacaacccatag  
cttatggcctactttctgattcactcttttgcactttatgggattgccagattttacggaaaaattggaacgaaatcgagacgactatctatta  
tattttactaattaccgggctcttcttttgcattacctggaattgctatattcgtaaaacttcggtatcaaatgggtactatacctcagttttggg  
gttctttgttaaaaaataaaaaaaattataaccacaaataactgttgattcatttctgattttgctagacgacagacaagtgcactcagctgaagcag  
tgtctgcactccttctaaaacaatcatatgcgtagttccaattccttgagcatttccaaacggctgaattccggtatctcattcattgtttcacaac  
acgaaacatgctgttacgatgtccaccgcctatagccaagaccatgtctcgaagctttgccaagctgatcgacatctccagaatgaca  
tgcttgaaggatcgcatatcgctactggggacgggttgctccgctaccgaaaaacatttccccgttaactaagcaaatccccgatactgactt  
tgtaaattgttgatcgcttgacgcatatctcttcagaagtcataatgagagcgccataccgtcatccgtatactttacgtttctagtttcatatt  
tcaagcaaacgctgcaggactgttctgtcaatctcagatctcaaaaatgacacaacgagattgaataggctcgataatttgttgactgat  
tgcaggctaaagcaaatctgtgtgactgtaaatctcattgttctcgtaaagcttgcctgtgcacctgctgcatactgtcgttcatccagga  
taataatttatgacgacctggaggaaggtcaccttctctgggcaaaacctttgattttgttcttacaactgaataacctcgtcatcagatgcat  
tcaactctagatcccctctgcacaggctgaaccaggagcatgttgccaagcagataattgaagtagtttaccatgctggcattcccttaa  
atccattagttgttacaaaaaaaattgcataccgaaataataagatgaggcatattgccatccttagctatcactttaaacgatcgactgtt  
cttcttccaacgacatcatcaagcactactggtctatattttctaccctatctcatgtgttagcttttacaaggctataatattcaattcatcgt  
cctttctcataaaccaaccgttactgtcatccacaaagctaaaaagacacgttctcctgctcaaaacttaccaggaactcatatcgact  
gctacattcttctcctgaagaagacataactgcatcgccattttgctgcacggctcactctgggcaagtattcgggtggagggtggacgcttaa  
aagctccagcgtcaagtaattgttacgatactgcttcatccgtataaaaagaataagaaaaaccaagtaaatcagtggtatgaaagagtttta  
cttgaagcgaagctatgcatccgggctcatccaagttgagaatcagagaccattcctttaccataaatcaacccttgaatagattcaagctg  
ttctattcttcttattcattctataaaaaataacgttccataataagaactactgaaagccaaagcttcaattctgtttcattctgcttaggt  
gagctagaagtaagcgaatctccccatactttattttctacaaacttggttcgtaaatacaagacaggttattgaaatctcatagcatatctca  
aaaaatataatagacttcttcttctatacataggaatagataaggaaagtaggttgccaattatccgaaggttttttaaagaccacaa  
tctttctcaaaaaatcaagatgcctcgttgcaaacccaggaaaacctgatctcaaggaagtttaggtattgaggaggcaatttctgattgt  
ttttacataaggatgagttagaaaaagtaagttatgccgttatacctatcttgaatgatggcgtaaacactcagatcccaaatttctcattttaa  
tccaacgagttaaaaaccggacaattactcgactacaggaatggtacaagatacaaatgttgacatgaattttgcaggtgcatcaaaat  
gaatgatcaatattggcggggatgctgctacgttctcaattacagcgaagatgaatcttatgtggatgagagtaaaatagcactttagaaccgt  
attcttatttgaactaatattcctggcgaacagattccaaaccaatctaattttggaacgaaagaagaaatgaggtattaaagaactga  
ccatgaaatattcaacagaacgttagaagaggatgttggctttgtgtaaaatgttacggcggaaatggaaactcgaattctgtttgtagg  
ctgttgacatgttaggcatgtacgaagaccgagtgaaatattctgatgggtccttattcttcttattgatcacatttcaagactataagcaaccttc  
actacgtatccgtctgaggaagaggctaaacaactacaatcaaagttgcttactcaatttaacaaagtattgggagacaatgtggcatccaagtc  
cttctgcttctgcttcaaatgtcgttcatagggcagacagcttcatcgttggatcttttagcctgaatttgaccaattgcacaccagctgtgc  
atttaggataattagcctgttgaagattgacaacagaacagctgtacaaaagtaaacgtgcacgaactaaacaggagccgctatattcct  
cgaagtgatggagatactttatcaattggctgcttgcaattgacgccaggaacgttactgattttggatgaaaccgaacttctgagtgccactga  
atgatacaggcgttgcgaatgtcgaattttatcttctccttctcaacaagaaattacgtttgctatccatttagtagctataacatacagacgg  
acgtgcgaatcgttgtttaaagccatggaagtcattctgcctgtaattgtgtatgcaagcaaatcgacgagtcattcaatgtcaagcgaga  
catctccatcagacgaatcggaagcattgtcaaatatctcaaatatggactcgtgctactgacataccatgatgatgttagagttcattca  
atcaaaactatgttggctgaggcgaatggttctcaacaatgaaaaagtaactttctattgagatcaattgctctgcctttatgcaaaaagtta  
gccagcaaacgtttcaggaggcattttgagaagcatctcgttggggaacaatggacaattccttgaaaagcaaatgggttagaacaac  
gctctgtttcaaggtgaaggttcttctgtgaaatataaaaaaccttattatgtatataaatcttctataatgattcagccttattatgatta  
cttaccgtacttccctctcaaaactttagcgagctcctacgaacgttggttaaatctttcactgaatatggccttctgaaattcaccatccagaat  
aggtagatttgaagaaattcgattgaatccgttcttctactctgaattttgtttaaaaatcttttacgtatcgtatcgaattaataatacaaacgt

tgcatatgcggtggcaagagggtcaatttcatttcgaaactcaatgaaccaggcagacttctgcaagagctccagtaagtatacactaata  
atctggataaattatTTTAACTTTTTtagcatgtatataaacggtagaactgggcttattatacctcagttaaaagatgttttacgagatattggac  
tacggctgtcaggcacaaaactgaacttattgcccgaatcaaagagttgttgaaaaaatagctattaataatgacatgaacacgtgggttac  
taaaaaagcggtgatggagacatctctgggtctattgtacattacaatctaatttcgcaaattatctcagacttttagctatcccgcctct  
gtaaataattctggcagtagagcgtatactagaccgttcgctccagtcgctcattcagcaattcgtttccggaactcattctacgataactgg  
aaccgtcaatacacctTTTTctataccggcttgttggcgacgtaatacgggtatcattttctttcaattgacgcaatggctctctcaaaactatt  
aagcaatccgaaggaatataagagtacttcttcaacccgacagatacaattggtttgggaatgttaaatggagatcctactcctcaaatg  
gagcttcggccaataatcaagtgacatgctaactatcgcggttgaaggagagagtggtactacaaccagctgacataacagactaca  
taaccaatacgtggtcctccgggaataatgttgttatttattatgaatgctacgaaaaggattctgtctgctgttcttgttaaggcgtatt  
ctgttgattattgggtgatgatcaagaaacgaaaaattgaaacgaaagaaaaaatcgtggagcgtattaagagtgaaaacgaggataccga  
tattattgcgacttcgacagatatttctaaagtgtccgttatcattaccagaatctctaccggtaagatctagtactgcaagcacattcaatg  
tttgatgctagagcgttcttagagatgaatcagcaaacctctctgggatgtcctgttgaatatacacattcgttatcctgattgggtgctgat  
gggttcagcaacatatttagagaatagcccagtaattccgaaacaattaccgttgatcccgtaggaaattggagcatgaatactttgatgaa  
gaaagtgaaggtccgaggaagaaaacttgcaaaggacagattatagaattgagcgcgaagagcgtctgctacgctgcaaatcctagt  
gaacctcaaatgtacaaaacgaaaggcgtcacctgcccgcgaatcaacaataaaaagaagagagaatctttgtaattgatcttacta  
tttctgacgatgaagaacctcagctacagcgtctcccccttatcagcaacgaaggagacagataaatcttattcgaagccagcatctcaagcc  
ctattcaagaaattccaaccgtcagaatccactccatcagaaaaactttcgttaccaaaaagtctgtgaatggatttctcaggcatcaacacc  
gcaagcaccactacggtccccttactacaacgacttctcatagatcttacagtacttatgacctaatcgtatctagaaggagttcatattcc  
ggcagacgtccgacagagtcatttgatagctccagagggataagtttctcctgtcaatacctcctccttagaggagatttctgtagggagtt  
accagtcgacgacagtcataatataatcatccttcgatccgtcgaggtcgtcagtgatggataattcactccaggagcccatatgacgactgc  
caatgacctgcgaattactaatcagtgacttagtactgctccagtgaggagcgaacccaataatagctccccatctgttaggtcggatactag  
agaatcacaactgtcaaacattatacacccaatcaaccagtggtatataataatccaaccggccacctttaccatccgggagctgaccg  
tgatctgcttagttatgatgattcgagagggaggtctatgttaagcttacctcaatacagaacacgagcgcgacagaggacaccactgcagacggctg  
gaccgctgtggaatgaagaggatgataaccgaatcaattgggattctgaattcatacctttcccgttaatagctctacgtaattacaagagg  
gattgtacgagtgatgtgacaaaaataaaacgggtctcaacaacatgggaatgataatggatttctattagaatattgatcttaacaaa  
aataattattctgttaattataataataacaacaatacgaacacattgatggataagcatgaagtcaagtttatttctactaacaccacattt  
aagcagagttcttctggggcgttgagaggcaagaatagcagaagagcgcgagcagatagaacgttcaaaaggcaggacggttagccagtcctgc  
caacacggccagcaacgctcttaggtcttacgggaagactgttagcaattacgtcgttgcggaaaagcttggcaggcttttagcgttcttg  
ggttggcttgggtgacaaaaaacaccacgagggctgttagcgttgataccaacggcacggtcgttgggtgagaccagagaaaacttgagagtt  
cttccggtgacgttgaagggtcacgggtgaattggatgccaccgaactcagagcgttaacaaggaagcgggttattcacggataacttgca  
gatgagatcgttgtaacagacatggtgagtgcttgacaagttcgccttgacgcatgaaacattacttttgtgactgccttttggcattg  
gaaatttagggctatccttgtgtgttcgagcgggcagggcctcactaagtatagattctgagatacaacgcaccgtaagttgtaacaaag  
aagagttgtagaagaagtaagtgaatgggtttatactttttataaaaaatggttccgagggagaagagttgaaaaggaaaattgcaattat  
tatcttttatacttacttctaactcttgatctgggtcaaggcattgaaaaatcaatcaatgactgggatgctgaagttagatgagtaaa  
tcagaactctttccatagcaaacgttagtaataatgaattttgtcctcaattagcttctaaagcgaatagcttgaacttgattgttacgattg  
agtctctggctataactcggaaagaaacaaaatgtgaatggaagcaaaaactttgaaatatttttaaaagaaaaaatatagacatttta  
ggaactcccctactttgcaatcttttacattcagcaacttgacatcgacgtaatctcatcccatacctgtgcatagtctaaaagggtgattctcac  
atgctacgtaccaacgcttataaacattgaggagtaaattgacctatctagaaaatagtgataggagaaaggcagcttctctaaaacttt  
ttaaagcagatgtatttgcaattcctgtcaactaactgtttgattcaattgttactttgttcaataggggttattcattaattataaaattatt  
ctgcaagaaggaacagacggttaattgcttctttatagttaggaatactgacatactatattgctggtttttatagagatggctagctt  
tcattgttattttctatgctactatcgtccttgcaattatagcgggaatcacctatgcaactagaagtatttggggaccacgttgcgtcaattccg  
atacttctgtgcatgattcgttgaatccgatattcagaatggattgacctcaattctttgatcttatccagaatgtgcttgcacaagacctcg  
agctggtctgatgaggcagcttctatgaaatgaaggcataatgaaaaacaacatgctcctcgtatcaagctcgctcatttacctcgaga  
tacgatgagtaaaaataacattgatcctcaggcctccatggatagtaaggctgtaactaagcttgaagcattatctcattttagaagcttac  
gaatgtcgaacatgattgactgcatttaagccaaaatggatcattttataacgtggaatgctgatttcttctctatgctcttttttaaac  
aaaaataacgacttgctatcatatctatgtcttctctgtttagaaggcctttcgtttgtgctgctgattccttgcaatatctgaataaccaa  
gaaaccatccggcatgataatcgacttttagagctataatcaagagcgataactattgctattttccataatgagaatctgttgattacaattt  
atcttagctttgccttttttagactgttctgttctggcttgttactaatgcgctgttttcaaggctcgttatgaaaactgcgcaatgcttattgtc



ccctattgccaatacagatgttctagtgtatcgcagtttccaaacgtagtagagttacaatgtttatgctcttcatcaccaccacctctccataacc  
aatcgctcttatagagacgtgttagcaaatgtttatctgtagcatcgttgacattctctatgttggggtgctctttccaccatttcaat  
agggaagctgtaaagcgcgtatttctattgtctgatccagtgtttcttccgagctgctactgtcgttctttgccgttgaaacctccattggag  
tgatacatatgtacttttccgactgccccgggtgatcggttacatnaaccgtagttttatgccgaatcgaagatcgtgattgttccggaattggt  
tactactgcaagctagcaagagagtcagacaactatcaaaatagtaattgtgtgtgagagcgttttgcctcaaacgttagcgattatgaattaa  
tcgctagtccggacagagacagacgggtttatgagtggtcattcctcgtcattgcgaaatggtgaacgagacataaaattatcgtctcccgtaga  
aggaaaagccttcttctgctttgcatctaccatttcatcagcttcaacgttcttctccggtctcacaccagtgacttcaactttagagcgtctct  
cctcctaaataaccagcgttctatgtaagcgtcgcagcctgcaaaccacttgagccttctgctgctgcaaaggccagtggtccattgtccagcgaac  
gcatgaagatgatcaacggcggaagatcaatttggtacatcaaaaggctgatcgttacaacaaaaataaattcacttctcaaatctcctcca  
aatgtcgggttttcttcaatgctgcagcaaaaggcagccttagattatcgacatcaaaatcccattcgtaccagattctagatcggaatgcg  
tcgtcaaggggttcttctgaattcgaagcggctcataaagaatgttgacatctggttcttatttgaatcaaaagatccatccgaatgctttaa  
tgtcgaacggaagctttagcttctatgtcaccgcccagccaaaagcccgttcgaataagaaatcgacagagatattgcaagctccactagtgatt  
catcacaagttcgtcttctgattcgcattacatctgctagcaaaattcaattcgaagtataaagactatcgggaaaaccaagtctccttat  
ctggtgtaccagttctggatcatccatccaggggcaaaactgcatataagatccaagtccaattttgatcgaagttcggaaacatcttatgact  
tctgtccttgaagtagaaactgctcctcaaaaagctgttataaaaaaagatgtgacgattcgggttcccattcatctattatcaagaagc  
tgccgaatccagctttacatccgctactctgaagttgattggaaaaaacgaaaggatgaacaaagtttccgaattatacgaacctaaccctt  
accatatacaagtttaagcgaggagccttacctgctgtatccttctgctttaaagaatgaagactcaaatgataagcttagtgatgaaagtaattc  
ctattcttacagccatcagtagaaatgctgctgtgtagcatgtaaccttttccaatctggaaaaaatcccggaaatactctcgaacgcagc  
actttaccgtcagaggtgtgctttaggactgtataaacaggagatctcatcctgtgcatatgaagcttaccaaaactcatttctcatctt  
ggcgaaaaagtgcaacctcagcacaatttccatacctaagagataaccgttagctgctcgaagtacagcattatttccaaacatgactc  
acagagtttaaaagactctatttcaatggcagcaaaagcttacttttgcattaatcgggtaatacaagtgctgatttaaaagtaacacctt  
tagatgagagctttcataccatcattctccgaaacttattcatctgctcacatcgtgctaatcatgcccgaacgaaaaagtgaaaccttccata  
cggcccatacattgaatgagccctgaatacaacttcttagtagccagaataagaacagcgtcgcagttgctagaccatcaatttcttatcatc  
ctccctatcgtcagtcagggtccgttaccatcgaaaaatcagcaagcgacgactttttatgatgctgtagatgatgaacgtgattggctcc  
tcttctcttaccaggattgatgatgattcatctcacaatacagaagaatctttgaaatcgcctgtgagtgctgaagtgataaactaggcagtt  
actcggatactgatagttcgggatgaattgctgtggtgaaaaagggaagccatcttagctttaaagattcgatttaaaatttcaaatgat  
actgctaaagcattgaagtgccgattggcaggtgttctcaacctgagaaaagcggctgacactagtttcttattatcgtgaagcttagattc  
ttcatcagcgggtcacgcagcagccattgcagataggtcgttccagttgttcaagaaaaaccaccctttaaatacaaaactgaaaaagc  
catcaccgctacgttaagaggacctactaaaaagaagaactttttcaaacgaagcaatggttagatataaaaaatgcaagggtatcccaaat  
atccaagaaagtgatattcctcgttctgattgatgaaaaccggagaaaattatgaaggcttggggcgccaataaagggtatctttacg  
tgataccgatgtagcgaatccggaatactatgtttgacatagtagtccgcaactatggtcaagatgtggtgctccacaagtgcttagcaaa  
tattataacctgtggatcgaatcattcacacatgtgaaccgagaagaattcattgttggttattttgatagatcagttacgggcaaaa  
agctgccgttaaagtacgtattcgggttgatcagcagtaaaaggatgggagagatgctttggcgttgaagactgcagaagaaaacgag  
aagcaaaaagaagcgttttaagaggaaagtgatgaaggccttaaatgggaattgggtcggaccaggaggacaagggtgaagaagatacag  
cgacttataaaccaatttagttgctgattgactatgtaaagctcgatataagatgttaatgatcttcaaaatcccgatcacctcaagat  
cgtcgttcttttcttcttcttataatgccctgttggttaattattatgaatgatgacctgattcaagcactgtattttcgtatgaacataaacc  
agatgatgaaaaaaatctaaattacgccttacgatctttatcattactagtttaagtagaagctttctttgtttcttctgttaataaact  
aatgtattttgatttttttttttaagcactacattgttctatttctttaaattgttgacacttctcattaataatagcgttacaacttttgagaa  
aagatcgagaaaaatattcatattcctaattctttgctgttttaatagaaaaatattaacacaatatcatcttcataaaactactgaattgt  
ttaacctttgttcttgacatcgttgtaattaactgtatgaataatggtttcaacacattcattacaagttgggctacaactttcaaaaatgttc  
ctaacttcttattatagacaacagaatatgacggatgaggaattcaagagtctctgagaattattacaatgagttaaagcaactttcgtct  
agccttaattgtccttcaattgacgatttccagaaacttctcctcaataactatcggaactgtttaaattgaaaaaaagttacaggacat  
aggagtaaaatgcaacaaactacgtctcattgtatgagcttgataggtgctagggagaaaaacaatattgaaaatgaattacccttagaaa  
cgattaccagcatttacttttacaagaaaaagccaaagggaatgatgacttagactttagctagtaaaaggattattttctggttcttccag  
ttcttgaacaatatcaaatcctcgtctaacagatcagaaatcaaagcaagactgtaccagttgtttgtctggcgaaaattctgaaggat  
tattctggagaattccccttttagacgttctgactcaaaagattgaacagctaaatcattgaaagagagattgaaaaaaaatcaatcag  
aaaagaaattttataacaagagaaaggagattttacctttgaaaagcactctcgacaaaatcgagataaataccaataattgtcagcgg  
gctatctggaaagaataaaggaatacaaggaaaaattagactgcttagttcaaaaaaagaaaaattattcatctcgtacgagtggtcattctgat

ttgagtctaaggtgaactccccaagtgcttatacaagtcccagtagacgagttaatggaaacgtaagggttctatacaatccaaaagatttaac  
taacttttttagaagaaaaagaccttcaagtaactctgtatcgataaagcatcgtaaggagatgaatcattattgaagcgctatttgcctcttg  
cgaagtcgctatttatcaaaagaaactgttatttaaggaaatcattgaaaatctgaaaaaggatgacatttggaaatttgcataaactca  
aacaggaaattcacaacatggaagtagaaactcatcttcgaggtgaaatcaatgcattgattcgaaaaatatttagcttggaggtagattatata  
aagaatcgagaccgttaaaggttcatcaagtcctcgcgaaacctttaccttgaagagactaaaaaagatttcaactcacacgtgcaaatt  
taatttattcttaagaattgggaagaagaaaacgaaagaaaaatcatgtttgggaaaccttctgatagactacagttttattcataccc  
tttacagcgtctgctagtaaaaaacttaattgtccaactaatgatcaacgtccaatctctactcaaactaatggatcccagccagaatgaaaac  
ggatgatgttcatgataatgatacaataggcccaacctatcctaacagaaatgatctgaatcagaaatggatctgttaaagattctgtctctct  
tttaagagacaaggtacggaaaactctgttcaagagtaagtcatgaaatgcgtcgccttaattcgttcatccagcaaaaccgatgtgaataat  
gCGaatgtcgaagcttgaagccaggttgaagctcaatataatcacttcatgtctgtcaacaatatcaataatcaatcgctatgccctcacct  
caaggtctctcgagaaatgattcaaccatatacctccaaaagggaagtcctcactgattagaaaatcttgcaggctctatacacaagaaat  
catctttaaattgatgcaccaaggatgacaatacaactcctaccttggaaagatgagcagtcatagaagaagagcgctatgtaaacggctaga  
ttcttttcttctcaaaagacatgatttcaaaaagctgaggaataacattcatggattgcactttccaccccgactcagggtgatccaaatggtc  
ctaaggattgactgagactatacttaggaagttgttatattgtctcgtactttaaagatttggggtatgtacttgcagacttatcttaatta  
atgttctcataatgattcttttttttcttttcttccctcacctttaaacaataggttcagaaaaggtctaatacttctaaaatcataattctttt  
tataattgctattttcaataatatacgcctacttctataaaccatagtggttattcattattatagattttgggtagcaactttgcctctgtcct  
aacctcttaccaccctacaggattaaatgggaaaaactcaaaaaagtcggcaaaagggtattatattcaacagtttcttttctaacatatt  
ataggacgttggataaatggataagcttgctaaaggtaagaattgcaaaaaacgggttgaaccattggaaatttggattcagtaaccgtgta  
acaattttacaatattttgatgattgtgacaattaatagaacagggataaccgttctgtctgctgcttcaaatagccaattgaatcagaagttta  
cttctagaaaagcaaaagtggttattgaccttgcgtgctcctgggtggctggttacaggtagcttctagagcatgaagcccggtcttacttg  
tcggttggatttactcttattgacctgttcaaaactgcaaacgttgtagaagacattacttctgataaatgctgctgcaattacgaggtatc  
ttgaagacatggaaggcagatgtagttctcacgacggtgctcacaacgtaggtgctgcttgggtgcaagatgcatatggtcaagcagagttgggt  
ttgatgtctatgaagcttgcctgcaatttttgggtcccgcggtacattcgttaccagggtttccgttctcgtgactataacaatcttttggggtg  
tcaacaactattcaatagggctgatgctacgaaaccccttctcgcgtaacgtgctgcaaaaatttctgctgctgtagaggttataaggctcc  
acaaaagttagatctcgtttacagatccacgactgttttgaggaagttacggagccaactccaaactagaggcaaaagtttgaacccg  
aaaaaaaaaaaaagaaatcgtaaggttatgccacaatgactatacttctataaaaacagtaaccgctgctgatttgtcaaggaaatgatcc  
aattcaggtattaggtacctccgcgaaattgttttctgaagaagatgaagattctcagcgtctgaagaattcggaaagcaacagatgaagatat  
tttaattcattgctctgatttacaagtttaggcaagaaggatttccgggaactgctaaatggcgactcaaggttctgaatgagttgggtctaggc  
aaactcggaaaccgaacaaaagaccgtcgtagaagaattcccgaggttgacgaagaaacaaaatggatcaagagttacaacatctgaa  
tgagactgaacgcactaaggtcaaacgtgagcgtcgttagggccaacaagcgcaagcaaaagagaaatattagaatgcaaatggggatggagg  
cccctatggagattggtatggaacagagcactatgggagacgacagatgttggattatctacagccgagaagcatggcctcaataagttact  
gatgctcaactcagaagttctcccacagaagaagaaatgaagtttggaaagaaatgaagaagaatgacagtgaaatgaacaggag  
cgtcttgaagctgagctggactctatgtattctcagtaaccgaaagaaagcagaatccgacgtgaagtataaggtaaacgatctagaggtg  
acgctgatgacgaggaatgggaaggaattcaagaacaggctagtgaaaacgaagaagcagccgaacgaagctcagtggaagaagacga  
gcatcttctacttcaactgacaaaaaggattcaggcaaaaacggtttaaagtaagaagctagtctttctttgatcaagacattttgaaggtatc  
ggtaatgacgatgacgctgataaggaaatcgttccatgaattctgctccaaggcaaaaagatcatctgcaaggcaaatgaaaatgaaagtt  
ctgatgaagaagaaaaactcggaaaggagatattgaagttgtccacctgttctgccaagaaaaggaggacgattgggattcagattccgg  
tgacgatggtgaaaacgttgacatagtgacggcagaagcaatgacattagccaagaaatgcttcacgcaaaaagctgacatctgagctcatc  
gacgatggatacaaccgctggacatttcaacctaaggatggacttccagattggttgttgatgaagaaatcatcatacaaaccaataagcc  
tatcactaaagaagccgcatggccttgcgagagaaaaatgaaggctataatgctcgtctattaagaagattcttgaagctcaaggacgcaaa  
aagatgctactgtcagacgtatgcaaaatgttctaaaaaggctgagggattactgaaagtggtgagatgaccgaaggcgaaaaaatccaaa  
gaaattcacgccttatgagctgcaatgaaagcgaagcctaaacaaaaggcgacattgttgttgcgaaagggtgtaacaggggtatccaatc  
tcgtcaaaagggtgtcaaaggtaatacaaaaatgggtgattctcgtatgaagaagatctcgtgcaaaaagcgttggagaagaaaaacgt  
aataaacgatatagtttaggaagatgctttatggaaaaggttctttattggtataggttcgatataatttgggtaataaaactatggttatattt  
ttttgactaaggttcaaattaatttggataagcttttcttcatgaattcatcattatattcattatgtagcgttacatagaggaaagggttaa  
agggtatgaacgatttagagatacagcgtaggtatatacattacagcaacgttaatgcaaaaggtggagctcctcaatcctaatttttgcgc  
acctattgatgtctcgtgagttcttctccagtagacgtttatcagtttttagcaactagtcggttacgtacagccatggaatataattttc  
ggaataaggctgctgattacaatttaaacgaaaaggaccaaaacaaagcagataaagcaccgacaggttaagccatgtaacaaattcaagcc

taaaaagttaatttcattcataaaaaagtcactgttcataataattcactaaccatttaataagcgagctcgccttcaatgtttgtgggcatatgac  
aaagtgcaggtagaatcatggcactcacgatctctgcataacgtatgcttctctgggtcatcaacatatcgctaggagaacgtgtgtccg  
ggcttacatgctctctatcaatccagtcacatagatacgtcctagtgattcagtggaagagtcgtaaaaaaggaagattaaagatgctgaa  
gttatcgctggctttccattaaaaattgacgaccagttcatcagaaagcattgtttaagcaaacgctgaagaaaaatggctgaccagatgag  
tctcctaggatggaaatcatgtctagagtgttcaattagtaaccaatccagatgtttataatgttttaagtaggactataatctctttgacgtagaa  
agcataactttcaagcatatataccagaagagtcagcgtatatacgtaaccttacctcctcgccaaggtgcttttaacccattatagcagaacccg  
caacaaggaaaattcgttgtaaaggagacaatggaacatggccaggataattggctttttgctaataataactatgtgaataatgacattcattt  
gtcgtatggcattaagttggcatacccccgatgtaaacagtgaaacgactataaggccgggttatggcgatattcaaacgtttaagaaacaaact  
catgatcctttaaataaaaaataaaaaaataaagatgccttagcgttatataagtaaaaggccatctaaagaggataagtaaaaaacagacga  
ttcgaactgacttctcaagatttcgggggtttccctgtcttcgcggaacccgcttaggttatgggttatggctggttaatataggtcaaaaataa  
agtaaatcaaaaggggaaataaaaaagaaaacgatcatttttaataatcgatcttgaagtcctcaactgagacaaaatgaattggctccct  
gtaatatgggttggtatgttcaaattcctgaacactagaggatggacgttttacagttgctgtacaatggattcctaaagataatttcagattct  
taaaaaagacgggtcctttcaaagttagtatacactgttaatagaaaataagagaatgcttaacgtacctctaaagattgacggactggatg  
gttcagaccattttctcgtctttaaactctgtaactttctttccgtaggggaatgaaaataagagataggtagcgaataataggcgtcggcat  
gggcaccagcatcggcgattttggaggaaggcagattatcatagaaaagatatcttggttttgaaaggagaaaatgtgtgtttgttcatatttc  
aggatgagtcgaaaagcaccgatatcgacgtaatgagattccaaggaaactttaggatctatgactattgcgacgaatgggtcttgaagcgt  
ggtttgctttgtgtttcaacatcaaccctgaaagccaacaaccgtagttggatgagaatgataccaaccaacgacgtttcatatcgatgaac  
agacttgacaaaggtttggtactggacactatactcatcagcttctcatgacatttacgagtttccgttctttcactggaagagcaaggcg  
tccaaaatgattaactgtgttctttcaccttccctgtacgtagccatgacctgaaaggcattccttgcgacacgtgtcgcagcattttcaaaag  
agcaacagcatcaatatggacagattgaaatagaatggactaggaatatgtcagtaaaacatttcaatcgcaatgttacgggtatatacctagt  
ctaattgagttttagcatactcgtgtttccatgggtcttcgcaagacttttctttctttcttcatcaaatgtgaaatatctcaaaagaggatca  
ttcatggctagctacgctgttcaaaaaaaaagtaattattagtagctttcactgtttgagtagttgtctaaaggttaagaatcactattaggagc  
aaggttagctaggaaaagaaaaaattctttcctaaaaaataaatgcttttgaataataaatgtaacgatacagcgggataggaatgagaagt  
gagtcgaaagttgttaaagtggaagggattttaataacaaatattttatcttttgggtcataaaaaatacatattcatttcattgaagga  
aatctagatgttttcaaaggctcttctgattgcttcaacatagcagaaaagttatgatggttttgaatgaaagaaaaaaaatcaaaaaagcg  
attataataagattaagagtaaggattgaagaatcttctcggaaagagctagttactagaaaacaaactaccatgtttgctagcaaatggggag  
gatgaatccatcgaataagaccaatcttatttttgaatctttttgttttctttttccgtttaccgatgcaaattatgcaatccaccaagctca  
gaaataccttactagcattcttttaatatgcccgatgcaataccatatagaccgaaagatagataaatactgaaggattatataaggacggagcag  
gaacaaaaaaaagataataataaaaaaaccccccaacaaggaataaaaacaaaaaaaatcattataaaattatgcaacacattttagc  
atcagtgaaggcaaaaatataagaataaaccaaaaaacaagcagaatggacatttctgatgcaaaagaaagtgagggatcaccagaattc  
caaaacacatcaacgatgtgcaagatctgagtgatgtaaggatgcaaacacagaaaacgacgacaaagtataaagagatacagatactagac  
aaagagcaagaaaaagactctcaagcaaggtgaatcctcaagctgggcaattcttcgcggtgactctccattggtaccagcaatgtccagc  
ataagcttaagttgttcttgagcaaatcttcaacaaagcaaacacatgaccgtctcaagctctcaagtcataaagccctgtgagttacgtca  
aacagatcaaaggccttctcagcttctcgtccatgagtacagcttcttgaacatagacgacgatgacatgatgaattagataagaaattgata  
atacaatggggacaataaagtcgaggatgatagataaagcaaaaaatataacaacgaaaaatggtacagtttaaggaaggattgcttca  
agtggtctatagcatgcaagaatgaaacggctcgtaggattgaaagaaagcaagagaaagaaaggataaatggaagaaaatcaagaatt  
agcaagaatgaacaagtgaacaatgttctgtgaaaatcagatggtgcttctgattctaccaaggataggattgtactcaatatttataatgcaa  
agagagaatattaaggaaggccagtagatagaagaagcagtgcaataaaaggtgggaaaaaagaaacataaaaaacaaacagttgataa  
aagaatcaaaatacaacaacaaaagaataagaagaatagctgcaaaagtagcttctcaaaacaaataattcgaatagcgaagcgtatcttg  
taatttgcaaacggtttatgctgtagaacaatgtagaaagtagcgtgcaaatgtttacgaatgcaaacacattgttatgcaagcttaccgaa  
tcataacgattataacacaggtacatattggagaaattatgttattatgacaacaagagagacaatggatgctgttagttcttcttcaaca  
aacgaaaatctgttagaaaataaaaaatgctttcaataagcttttgattgtttcatgaacgtcgtcatccgttcccacctcctcatagctttgg  
gatgaaagtgtcagtgtaaggaagaagaggatggtgatattttgcaagcaaacgggtgattgcaaaagaaaaaggcgtttgcagatgatg  
taacgattgtgaaaaagcgcaaaagaaaaggaaggatagttcctaacaacgaatgatctgaaagaggtggatcaaggaagattgggattttg  
aagtttctcctaaaagttgcatcaaggaaaaagatttaagaagaattttttagaaaaacaagaaagagaaatgtaactcaagcacaacact  
tcttggtttgttaccttcttacttttctttcggtagtgcttcgctaaccgtatgcttattattatacttcttcaaggttgcgtaggctcatggact  
gcctttttctacggctcgtgctttcaagataagaggagacaacgttacttgagttagcaagtgtagtaacgacagttgctcctcacatatttg  
ttacctgtttacacagttcttccatcctccttaaccacttccagcttcttctccagcgtattcctttgagatccatctgtatttccgcttt

tctgtttatcttctggtttctttgtacaataacacctcaagctcttctctgaaagctgattctggttggcgtcgtttaaaaagttcatcgtctgtt  
ctcgtgtttctacgtcttttctcataatgaatcatggctgcatcgtacgtattttatgcatttctctggtttacggtttgagcttttcttcttca  
atttactaaccttatgttctttcagatcctgtggaccattccgaattatcaaggaaaccgctcgtgatggagccactggcgaagtaaagcaactc  
tcttatacctctagtaaagctgtggccttggagctttgggtgctgctcattcaagttcatctcattgaacacgacagtaaagctgccattaagcgggt  
ttacaagataaacgtttcaaggtatgtttgttttctttgttttctgtaataatgagcaaatcagaccatcgtaaaacccattttggtttgagct  
ggtttggcttaactgccttttttttttttttttttttttttttttttttttttttttttttttttttttttttttttttttttttttttttttttt  
catcccaacatcatcgattgatcgcttattactacacaactgggtaaaatctcgacgaggtctacttaacttggcttggagttcatgcccga  
caatctaccgtgcttctgactatgctcgtcaaaaattatctatgcctatgattgaagtcaactttacatttcaactcttacgatcattggcct  
atatccacgccagcggaatatgcatcgagatacaaacctcaaaattgtcgtgatgactcctgaaactgggtgctttgaaagctctgagcttggta  
gtgcaagattctttagccgggtgaaccaaattttcctacatctgctcacgttactatcgtgctcccagctcattttgggtgagcagactatact  
cctgcaattgacataggtccactgggtgtcatggccgagctcatgctgggtcaaccctgttccctggagaaagcggcatcgaccaattagta  
gaaattataaaaaatttgggtactctaccgagacaacaaacaatgaatcctaattacatggaacatcgatttccacaaatacgcctcat  
ccattctcagagtttttgcgaaacgtacttcagaagctattgacttactaacaacaaattgctgcaatacactcctaccaccgtctaactgctat  
agaagctatgtgcatcctttctttgatgaaactccgtgatccaaataccagactcccggattctcgtaatcctcaaaatccacctgctcactgccag  
atatttcaatttttagtcatcaggaactcttattctgctgatttgaataaaaaattgatacctcctcatgctcagcttatttaccgttgatttgg  
caactttgccccgttgaatcaagcgtgccaaattgactaaagaacaaacatgtgaaagccaatgctcctgcaaatgtgtgagtgcaaac  
gatagtttccgatttctgttggcacttttctgatcaatctttgctccttggcagcttctgtttcttttgaatattatcataatgcgattatctatct  
acaacttcaaaaggtatctagttgttttgggtgttcttaataatattttattgagtgcaagaaagaaatgcaagactaaaaagcgaagataat  
aggacttttaaatgctcctaagaattgagacacgatctacaggatcacgaacaggataatgtttatgttgattggtttccagtaatttttgg  
gatcatttctgcttaattgtctggaacttattatatacacgtatatacatgcttacaacgttattggaaaaataaggtacttgtttaccggat  
gaatgtgcatcaaaagtagtcacctgtgaatgtatagagcagcagtagtataatgaatctgacatagaagaaggattgaatatttcat  
tgataaaaaaggaatttatacagatagggaaattttcaataaatcaagaataaagtcctgataataaacatataagtaaaagggttt  
taaacacgcaattttgaaagcaattcattacaaaagtttaggatgccaagtattatgcaactaaaaggagcgaatggaaaaagacactataat  
gcaatacaactgaagtttctcccgtatctaaaactgcttggcgagaaatcatgatccggcttgcagaaaaagtgatacaaaaagatacacc  
gagaacaaaaagatgctataaactagcaaatggtagtagtcattgaaaagaaatccagatgcaagaaagatagataaacctttatttt  
caataaacgaggaaaaaatcaattcaataaagttgtaatttaaggatagtagtaagcaaacgacaaaggtaaaacgcattgggagaag  
aaagctaaagttaaagaagatggttacttaattttttccatcggcagcatagtcacgatcgtcttcgcttacttccgcccgaatggcttcat  
attccataagctcccttcaaacatcatcatctgtgcaagagatttgcacaacagcctcgtcaggagcagcgaatgaattccaaggcgt  
caaagagttagtaaatgacatagttgtatgtaaaatataatgtgatgtccgttgtgatgagcggccccattgacaatgggggttggaaatgt  
actgcatcatgaatcataatggcagaaattaacaaaagtgaaaagggaaggttaagtcatttatggagaggaaagaagaaggga  
agatgatagtgtaaagattggaggaagcctgcccggactgaaatgatgagaagcatatgggtgcaaatgatccattatgggtgcaactgtg  
aagacgaggataaacccagcgtgatggagaaagcgtatgagcccaatagatgcaaaagctgagaagagaacaaacaggaagagagat  
gaagtaataagtttccgtaatcgtatgtatatacaaatagccataaccgtggacttccgcaaaaacaaaggactgtgagtaatgcca  
ttccaggaagatttttgcgcccgaatctccatccatacttgggtttttagaaatttggatgcttattaggcttcttcaaaaacatagtggt  
aagacaaagaagagaatgttatatacaaaaaggaacctccgaccatgttaaaaagaacaaactaattgcttccgactatgtgatcgcgagc  
caaagatacgtttattgtaaacagaatccaagacataatgatcggctatataccagcaataatccatggagatgagagtgctgaaaaag  
agtgggtgcaagcagcgtataagactgtacagaaaatggctgatttctaattacgagatgggtggcctgtttacattaagcttactaaacga  
attttagattacgtaccagttgtatttctgtaacaatcagtgattcagaaaagaacgtgattccatgaggagaattcattgatgtttta  
gtcttactgaaataagcaaatcaagtgagaaagacacgaactgctgatgttactggcatttcgaccaatagcttgctgatggggacagccaa  
tttatgtttacgaatgttttccgtatggaagaaagatgtattttttttgttgccttctcagattttcgggatcagctgaaatgagttt  
atactcagacactgaacgaactacgagatctacgattcaggaccatttcttcatggccaaagaatgcaatagtagatgacctttgtaac  
gaacaaaatacttcaaacatctcaataccatgttagtagtgatcatttgctattcttggtttagtagtgctttatgaaaaatggactttc  
tttcaaaaagcttggagatatacaaatgttctttaggttgggatgaggacctggaatttcgagtcaccgatcaagatggatgaaaaaca  
aactggaaaatcaaacatgtgaacaaacagagtaatatcccggttacgattacaacaagcttaactatacgtgaggatgaaaggatcgt  
atatttttacgctggattatgttttctgatttttggaaaacaatccaacctatgaaagccccatacagtgattgttcttcttcttcaaca  
aagtattgactcggcaaccatattcactttgatttttaaatctcaattataaacgatccctctgtataactaccaaaaggtattatatacaacagg  
aagaaaaagaaagcaagtggaataaaccaatacttttttttagcaacggcaaggtctaaacgctagccatttcatacatcgtgagtag  
ggaaccgatggtctcacagaaaaatcctaaaaaacccgacagacaattttataaaaccccttcaacgcattcgtaaacgtggacaaagttgag

acatacacaacatcggattatcagcagcttttaacaaaagcagcttccactcatacactgcaatcgtaattttacggaaactataaa  
attcaacctaatggataagacaaaattgcaagtcacctaagaattggactcagtaaaattgtatatcatcactttcgatccattcattttacc  
tcaagattgcaagcatttgtcatgcttgccttttacaacataaatacagcaattaaatagtcgcaaagtcattaaagaagaataaacgtg  
gccaattaaggcactaattaaatccaaaagaggggaaggttccactacgaaaccatcgtaaaagaacaaaacccatggaacatagggactttt  
acatacaataaccctaaaatggaaactctgtacaaaggggtttccaagaccagatatagagcactgaatgaaaagtaagtagccgcaatg  
gcataagaaaaaatatgacgtgactagtaaaagatccacagatgatccaagtgcttcaagaagttcttgtctgtggaggaggacttgactctt  
caagcactacataaatcgtaatagaaaggataggtacaaaatagactccaaacctagcgggccaatatacaaaaaagtagtaatagccctcc  
agtactagactatatcagtttccggctgctattggctgatattttacatctcatatcgaatgtttacacatcgatctagcaacataacctctccttga  
ataaaaaataattccaattaaagaattttcaattccgaaaggatccaaaattctgaaacgattagctcgcgttctatgctttactatgttttacg  
tactaccgccagagctgcaataaagtgcacaaaatgaggtatcttgacattgttaacatttataattcacttaataatttacctgtaacagg  
aggagtctgccttataaactctggaagaatggccattgtaaacgaactttgataggtggtttgcagaacatataaggtgagtagcatttataat  
attatgatgaagtacgtatttactaccagcaaggaagaatctggagattggatattttattctgtatatttaattgatttttaccataacttta  
gcttcagatcgaacttttgataccaacaactctctatgtttaccgtaaaatgaaagaaatgttgaatcctttccacatattcgtattctct  
tcttttgacgtgcaactttcaaatcgtaaatcttgatatagtactagagtcattagttaatcaactgtataattgagtgcttgggattaact  
aatccgttgagtgcaacaaacttacgttctaactttgttccagaaaagaagaccaaattgcatcttactttttggctaaagtgagtgctgag  
ctagccattttctcagcttctcaatatttctaaactgtacacaactctgtaatacaatgactgcaactgagattcgaaggtctattgaaag  
ctgggtaagctcaacaagctgtttgttttgaacatgagcgttttctcgagatatttttaggatcatccaccacagagtatagattagattttctgt  
tcttgcagattttctatccatttcaagagtggttagcttactactctgtaacaagttgaccaaattgagcgtagacaaaatgaaaatct  
ctttgggagatcaggcttttaataattaatctgtaaatagattcggcttctcaaatctttttatgcttaagcataccgtgtaataattcga  
aagtcgtttgtcaaccgcttgaataataattttctcggcttccgaaaatgtgaaacggctcaaatgtgcccctaccagataacacttaagatt  
atcaataatagaatcaaacattgatccgtttcaaaaatctgttactgaggttcatgaggtacaaaatctctgaaatgcgtaatccttctga  
agaaatcgactggcagctcccgaactagttccggtaagtagcagactccagaaatgaaatagcagaataataattgattgatggaagcc  
atctcagatatacagaggttctccgtctatcgtaaagtcaatgtgagatgatccccatttagagatcagattccagaagcatatgtacagattc  
aacttttctagattcaaaaatcttctcattatacattcacaatctgtttatacaaacaggacagctaatgatgttctggttgaatt  
cttccattggtaaatcttgattcaatatcaatgcaaaagagccatttctgatgattatgatcattggcataattataatgttttagaaagttgct  
ggacacttgaagagcaggaacagagataaaattcatataccattatgagcattggcaacacctgtgtgccaatactttcattactttgca  
atacttctgcctcttggatacaacgaagtaataaaaacttccgagcccttggtaggttttacaagatacgcgctaacagaagttgtaagctg  
aatttctctgcagaaattcaaaaaacgttagagacataatagacacaaagcgtacgtgttgccttgcgaattagcatggctcgattat  
agcctcagcatcagcatattctgtgatggtgcaacaaaagttcgcatatacgttctagtaaatagttcaactcgtggttcaacagtgctatcct  
atgtaaaatagtcataaaatgtactaataaaaattactaataaaaagtagcaaccagtaaaaccgataaagacaacggagaccacctgt  
cagtaaatcactaaaagctctgtactcattgtgctgtagagttttcggcttctgaaaataaacctcagccaaagccatagaaatagatg  
cctggagcttcaaaaatgctctccttgggtgtagtgaacagtcataacattgtttggtgtatacagagcagttgagtcaggatgatcaaaagtc  
ttaaagtgcttgaggaaatattcaattatattatattcagattgcaaggtattattattggtataatgattatagagcaggaacaagtaata  
ttaatcacgatgaatctaattaagttcttttataattatcctatcaagttggcagctcaaaaaaacaacctaactatcgttttgagaaagctact  
aaagccacatagcttttaaaaacttaattttctcttagctcctaaagatcaatattcaccacgaacgatttacagccattcgggata  
agaagaacgatctcattatgccacatagaaaaaatgtcttgacaaaactgaggggaagcagtcctttataatgctagacctatgtcacgcataa  
gttgcaattgaaaatgagtagtattgtattgttacgaggtgagaccaacggttcctttgatccaatgagttcagaaaagctcgggtaattccca  
tccaccttttcttgggacgcaacaaggacataggcatccttctcaagaactcatgtctgtttgaaatcttggttcgaagattcaggatgcc  
atttctgtaatgattcccgaaccttctgttctcgttagtagacacaatcaaacatgtccatacctaagcaacacaaaccactagatcttca  
gcataccgacaccataaggtatctaggctgttttcaggaagtataccagtagatgtgtggactaacaatcgtaaatatttctcatagagac  
atttgatacttacttcacaaaaagttgtctttctctcctccgataaccgccaactcgttctgggtatccctttcatctttcttaca  
acaaatctctcgtagcttcttattcaatcctcctgaataatacaaaaaagatttgagtatctgtattttgtgtgctctatacatcgatccaacca  
ccgtatcgatcgatacatagcttcttccattcgggtatcttctcaggtatgaactacatcgtccaactgcatataatgtcagacccaattgat  
tttggagctccatagagtgctctggggttaacagcattggtgttccatccctaggagataaaaaggttactccttctcagtgatggttagcaagctt  
caacaatgaaaccattgaaatccaccactgtcagttataagtttctttccagactgcaatttgggctcctcaaggctatgtaaacctctt  
ttcctggcttagcccaaatgtaagtagtttcaacattatttgacagccattctgtccaactgttctggtagaacaccttttaagaggcctcta  
caatatattagtaattttactaaaggtctactggtgaacatacaggttctacgggcataaaaacaggtccttcgacaggaccatcgggcaact  
caagaatgcttctagcagcgttgttgagcattttcgattactttataattcaagctggataagaagaacatctaattgaaaggaagctt

tgttacgatggccgtctgagctcaacgaaaaatgggttattagtagcttggtgatgaagtaggacataacacttttaaaaaacctca  
acgaccggataaagagagcaatgattgatgaatagctttataatgctttgttttaataagaaaaataaccattttgaaaagaagaccaagatt  
gtgctaagtgaagcttctttgtagttctagatacattggttctgtaatcccattgaagggatctgaatgaaagtagggctcttctgttctttg  
taaattgtgaagatagtaactgaactgggcaccagatgtaaagaccagattgtgcagaacagactcaaaataatccattgatttagatt  
caaatcagaaaagatagcatggataaactctgattttttgaattttaataagcattgtatcatttctgctgatgataagcttcatatgcttctgtaa  
atctcttggccttgatttctaaatgttctgctgactggatcaatcgaaaactagctcaatagcataaggaaagctttcataaagagaaatt  
gtatgaatgttgatagggacaatgtctgaccatacacgaagttttgatcactcattgaattaaagatgggtgtcataatcagggtcaaaggag  
ggaaaagttgtcattccaaaaatgtttctagtaaatgaaacaaatgcgcgaaaatgtaattcaggagaacacctgccaatccaacctctgt  
ctcgagttgtttattgacgagacgcaatgtccagataaatataactcagatggatctcacattctctcaagatagttttttgtgtagatta  
agttgcttaaaaaactcagcacattctgtctatccctcgcaacatccaggcaggtcattaagtacatatagcttcatattccttaaaaggcaag  
gaaggctcattaagtattttctataaaatcgtaaagaaatggaaaggtattgtttgagtataaaatgtcagatagaaaaatgaaaaattca  
agtcgtttgcaagagttgcataattaaatagtaacccatgataaagactagcatataaccattccgttagctgttattaaagaatcttcaat  
gaggcgatagtaggaaaaaacgtagctatgaagaactgtgcaacttggtttggtttcacttttgaacgtagaagagagctgtgaaa  
tagtaaaacttcaatcaagaacatcttctattttttccatagtgagcaatccggaattaaactgggtactctttgccttctcagataacc  
gaagcatactttgtaagaaccgtcgaagaatgaatcaaatctgaaacctcgcaacccaaaagacatccatcttccatgacatagcccttct  
tgttgaaacgagcctattatgacatctggataatgtgcttgaagtgtacaacaaatcgaggatagggatcattggcatttctgcttttgata  
taaggataacaattggtaaattctgaatctttatataagagtcttctgctgcaaaatagtaaacgcacaagagaaggacggagggtgacat  
agtcagaaaatgaataagactccatagaacttgcaaaagcgtctttatcttctaaaaattcatacatagactaaccagttcaacaatttct  
cttggtatgcatatgcataacggactccataaggatccaaacagcctaaaaatgtgacggctatggagtgcatataactgcttccgatacaagc  
ttttataataatcgctagttggctttatcgaaatctgtgaaaagacaaagctacgttcagcaatgactcaattgcttctgttgcagccttct  
gtgaagccaaacctggaaactgtgtaaacgactagaaacaaatctttagaacctacaggagcctcagaagccctattatccattcaatccat  
cttgtaaatcataaaacctgactttgatttctgctatgaaggaacagaaaggtagtagcacattactatccggcctgcacaaaccaaatag  
accataaattgtacttttctccagttaaaaacaagtaagtgaaaaagagacttcagaatagaataagtctaataaaagagcggtaaaca  
gagtgatcattgaatcacgaatatttagtctctgtgagaacgatctactcagttggtgctacaactacttatgtatgttccatattcttactttat  
accattcatacgttatgtcgtctgtcttcttcttaacagaattgaatacaccaaatataactaatctcgcagtagtagaactattacc  
ttcttgagtatcacattataatcttataagataaaaaagatgaaagtttttgattcgccatggcacaacggagcaaaaacaaagtcggaatc  
ttggtatgatgaaacatgaaagaactagttgtttctcatctattacatattgggacattttgttaactctatttagcaaggatctgctgacacaa  
gtttgaatgaaactggtaacttcaagcgaattattggggcgcagactttcagacttaggaatcgatcaaatcttgcagctcaatgagccgtg  
ccgagagggttgcgaaatgaaaacttgagaaatctaaactcacatagattatagactattgcccttacttgaattacggccggaattcctat  
tgaatattcagattaatcagagaagtaagttggtactatcacttactgactgtaatagagaatctatggagaattggaaggtacagatt  
cgtagctttttatatacctacaaaagcttggaaagtgctaatgagaaaacaataggaatgaacgtggtgaaagcaaacgctgatgggtact  
aagcacctgatcattacggagaaggttttcaagtttaagcaagactgttaaatgtgggacgagcacgttcttcttctgaaaaaaga  
aatttgggtgtcctttgcatggaggttaaatcaatgctcttctgtctattttaggaagaaaaggttatacctatgatcgtaccaaattggaa  
aagaaaattctactgtcaacactagcattacggaagtcgaagttactctgaaggtacaggacatattatactttggagatgctgctcatctag  
aatcagaggaacacggctctcatgcataaagttatcatcttaactttttattatacctgacgatttaattcactaaggattttatcaaaaat  
tagagtgcattttgtctagaattaagcgttctgtaaatctttatataaagcagaaaaatccgtgagggttttagagtcagacgctgctcata  
tgatgctaaaaaaagtgatataaacacatgaaataagaaatattcatagtagtaacatagcagtaacgtagctttgttctgtaaacaaacta  
gaatccattcatataaaaatcgtttaaaaatataaaaatataaaaaaccttgaatttatatacagaatccaatcgagcaactaaacataaggaa  
aacacaatcattcatattcaaaacctctgaaatagtccttctatcaagcctgtttcctttgagtttctgcttctggtttttgacgatatcgttca  
acagacatgatcaggtgttaccataagtgatttttttagagttgatataatgagggtatataagaattagcaattcacgctcctttctgttga  
agcctccagaagctttgaaccacataattgcatactgtcttctcatcaacattaaatgctgacattgtcaacttttctagttgactttttga  
ataatagggcgcgatgctttcggaatgtaagatatacatttcaacaacgtttgatgcgaacttatgacaactcaagtatagcaaatcttag  
ttattagtttaaaaaaaagttttatccttattggtgctttttcagtagtgctgaacaacatagttaccatactgacctgggtcaattgtaaag  
aataaggaaggagatcatcaattataatgtgacttcatatgtaaaactttcaataactcgttgaattactcgacaaccataaggatgagccgata  
acacatgtattgaggtcgcaaaagcctcaaaaacaaacaaagcttcttgagctatacattcaatagactttgaaatgacatggtttccattctg  
atcaaaaacactccaatacatgacatcaagttcactaacaattcaacttctgctgttagcaaatgttctattgcttctgtacaacacgac  
aacatacatgtggacagccaatacaaaaagtgaccctgattttgaaacaaaagggtttctgttctgtacatattctaaaaattctgt  
ataacataatttcaaaaatccatcataagttgtaagcaattactagaataatcttctgaaaacagcacttttcttctcagtagcagttgc

taatttctgtgtataaatcttgagccatattgatcactactgaatagaacgacgtttcctaaaatatcagaaagctcgaatcgcttcttttattatt  
atggaagacatgcagtagcttagactgagaaaaataattatgtccatgagatcccttaagtaactgatcctcgacgtttaaggtcggatacggatt  
tgagataccatcgattggaatacttccaaaaccactacaggagctaaatcctggtgatattgcataagaccttgaagaatctaatagcattgtgt  
ttaaccgtcggattagcaattggataaacggattggtttgaacaagaggcatagaagtaaggtcagacttgaagaagacgatatgtcagaag  
cgagagttggagatgttcggaaatagaattccgctcatttaccacattaggaggagatagaaattcacatctagcttatccttatagtttgca  
aagttccggataatggagccgcttgtaatagatgccatatacaccgatggaagaatgcgacgtatggcggacagcacgtcgattaacaggcttc  
caaaagtcaagtgagctcgagatggcgagataaaatccgactagaaggtgttgaggaagaccctagaaagagttcttcctaaatcggttt  
taaaggaggaacagagtttgtaaagactggggaaagcgaacaccagaatcagagccgagctgaccgtataaattaacctttgagggagaact  
ggtgtcctggttaaggcggtgtcttttactcgaatcaacaaggcctttagagtgaaatgggagactcaatgttagcaggatagtgagtaaaaac  
gggatcctgtaaatgtttaaagaagaagaggcggtttccagatgttgtttcgaaggatgctgactgttcagagagacgggatctgcggt  
ttcttggttcattgacaaccgatggaaagcggaaaaggattgaggaaagatgaggaaagatcagagtcatcactccagaagattgggag  
tatggtgataacgaagaatcatgtttcacgaggtgaaccacttgaaatcaagcttggacgaccctcggtatccggaagaaaagttaaaccg  
ggcattttcactcatgccatcagaaactttcgctttagatttacagtagcatacatggtgaattaaacagagtaacaaagatgataaaaagata  
ataaacaactgaaaccaaaaaagtgggttaaaaaagaagaagcgaaacagaaaagatcaaaaaaagaataaaaataaagagaaaatc  
aaccaggaagtacaataaaggtcgtaagagaagataaaaaacaaccagaaaagaaaagaacaataagaagaagaggttgccttaagat  
aagtaaaattatgcttaataacagggccttaaggaagtataggaaaactaattatcatacaactcgagggaaagaatggaagatttcttca  
aaaacttagctataatgaacaatcagtcgatgtgccaaccaccgagcttggaaatgtcacggatatcaaaaaattgttatcaataatta  
atgaaaatacagacattcaatgtatggaataaacggttggaatctgcagggcaatgagcaatggaaggacgaatcaattctgcaaaaaca  
cgagaacatccaatgttcaattctttaaagggatgagatagtaagaaaaaacaacacacacacacacacacacacacacacagtagaatga  
aatgcaataagcaatgaacccttagcttttcggatcaacagacgagttttagaatcaataagtcgccagtaaatgttggtagaattgt  
gttcagaataattccttgaacgagcgaaaaagcttctttaaattgagattgcttaacggaaaggaagaaaggcaaaaggaggagtagtga  
gtaaaaactgaactaagaaaatgaggcttccactaaaatggtcccgaaggaggtagctactcctttagtcatgccatttttggaa  
aacggtagattgaaagataaaacaaatcaagactttgtaaaaaaaataacttgaatttacaattttttagaaaaaatcttcttcgatgaa  
gtcagacaatgtcgttgttttatttaataacgagatgatggaaccccccttgaactgaaactaaaagaacgttcgttggataaggaggatcaaaa  
ataagcagacagatgttcaataaaaaatcaactgaaagagccttcagcatctgctttaaataagtcactgagtttaagaatcagaat  
catgtttgtatcagtaaatcgcagcagcaacacagttattgaagtgaacttagagggtggaagcaacttggttctagaagcctaaagacagtt  
aaattgtaaaatgaactcatcaacatcaactgcaagtataagatgttatccttgattcaaaaaggttgacggaacaattcgttggaaacggaa  
gactgacgatctgacgatcgactcgacttgggaaaagcaaccctgtaacaaattagattcatttttaaaaaacttgaacaaagaacagcc  
atggggctcatattttatgcaattccatgttataacaaagacaaagagaagatggaggggatcgagatgaaagttgtcttaagagtgtta  
ctgaaagaacattggtgaaaacgatagcaaggatgaatttgaagtttgaagtttcgacgaccaagtttgattggattgtaaaaaata  
agtccagcaaaagtgcagaggttgaagggttcaagagatgtgaaagttatagtttaagaacgatgagacattgtagaatacaaaa  
atagaatgtataaaaaatttttgaataaagggtcatggtcaaggaattgtacaaactttccttccatgatgagacatggtttctgggaa  
actagtgaacacatccatagaaaaatctgtcataaagtcttactgagggggagcattttgttcggattttctcaagtgctacctaactt  
actagtatacaagtaacttggcaacacaacggtcaatacaaacactttctccttggtcaaatcggttccctgtatggtgtagcaatgcattttat  
gacaagaagataaccattctgcagtttaattgtaacaaaaaaattcagaagtatcattgtgaaatgaattaggaaaagacatgctcaaccgcc  
cgcaactccaaaggttccgatacctgcgtagcattcaatagaaccattcttaaggctgattatgtctttgcaaccattctttataaaagcgacga  
aacatacctgtgaaaatctccacacttaatttacttctgctcagccaaagcaatgtttgaggggtcacagattgattcccctccgattccga  
aaaatgacatgttggctaaatgttaattcaaacatgaactggcggtatgattctcctttgggcaaaagtttggtttctctgtctatggaagc  
tgtcaacttcacaggactaggtaacgttcaggtaacagctggagagtgaacaaattagaaaaatgggggttcagggtttgcagcagat  
cagaggcttgccttctgagaaaagaaagtccttgaacctttttacttgaagatggaatgaaatctggcttgttcggtggttaaccttg  
gatttttggtagatacttgccaggagactgaaactgtccctccttcttaaaatgttaaaaggacatgattcatgaattgacaattaaact  
tttctgtatcaatctacaaaacttgctcctgctacaaatcaacgataactctggtcgaagccttagccttggtattacattgcaggtttgtgca  
ttcctttcattcggtatggaattgtactacaatctcaactcctaattaatttctccttattttactttactttcttcttcttcttcttctgcaaaa  
gcaattcgttagataatgctacgctgctacctttcttgtgtgtaacaaatcactcgaatccatatttagcaagcgttttatgaaacgcaatcc  
tctaagactcatccacgtaaacactacaagaagcttgcctatggcctaacttggtaacaaagtcgaagctcaattatcggaacctcttctg  
ttattctttcaatcgacctttttccatattctccccttgacagcagcattgaataactgctatttggattcaacatgctagttctcaacaattggc  
agagatcgcaaggatgtctacatatccatattctttagctaaaccttttattcagtaacgaaaaactgtcatgtatgccgaggacccaatt  
acaagaaatttgtgctatcccgaaggtgctgataaaccaactgttcaattaacagatgcatgtctcatgctcaagaactgtcaaacatctt

gattttggcagaacagtgctctatcacaatcactattctcgtgtagctgcgttttacaaccgtcagagaaaaaatgatggtacaggaagcgtt  
gttttactaccattgcagctcaggatgtcttgagaaacgcattaaaatccaatcgagcattagacaaagtgatctcctcaactttaagttcatcca  
tgaaaaatctactctcgtccattatagtttctttaccggttatgaaaaaacttgatttatactgggcggaacaaaacgagtcctttcaaccag  
ccgaatttgggatgcgtttcagacacagttcaacattcagcaacacagcacagaagtaaacaccacttttctaatctccgatatttatcatctt  
aataaataatagtaattgaataaacatatacaaacacatatagtgtagctcaaggctagatagacttctcaatcctttcatgtctgtctgggtt  
tctagctctcgtacctcaagctatagagcctatttatacactattttaaacaatatccgaagaacgtagtttaagatattcttgatcaaacctga  
tggtagtcccgaattaagccataaatttctttatgtgataccgtagacgtgctttggatcagtgtagggagctggcaaacctgtaacatcgaa  
tatttgggtggaagaacgcttgggggtgcctctatggaactgtaggacaatttaggggatcattctgaattgggtcactttgcaaagttgctt  
caaatttgcatttcttggactgagctttatagttcggatttcgaaacggtttggaaactaaactgatgtctaaatcttccactgttgcgtgtttcc  
atggcttttttggcgctatggagtttgggtcgtgatgtttagcaaggcgctccctaggtttatagctttatgaatttctaatgaaaaataatct  
tttagaaaataaataactaattttatgtttcatgaaatggaatacaatttctgcaatgtagtaattgtaaggacaacacttagtactttaaag  
taagcataagagaaagacttttcttaatacagaaaagaaataattcatttctcacaaaaacttagaaaaataatgcaacaaaactttca  
acgttactgctccagtaatacgaacaattcatcagtcgcaagttcatttctctgctattatgaccacgtcggagcatgattaaggatattctt  
aaatgtttatgcatttcttaatgcttctctttgacgttgattccagccatatccagtgctaccggttctcagctgcacacgtgaaataattcgga  
atgatgatccagcgcatcagtggtttgtaagaccctttcacttttaatagacacctcgtggatgtgatgtagggatgtaagcgctgatgc  
aggaaatttgcgaccgggcccgtgcttcagacgcttctgaacgaggtcggttttatcaacagcacatgaacatgttcttctgagctttaa  
tttcgataaggtaaaaaattcgtttctaaaacacatgattctcgggtccaggttcagaagtaataagtaaaattacctgggctgttctgcc  
tttcttctgcaacctcaatccaatgctttcagatttctgaacgtctggtccttgcggaatccagccgtgctgcttaagaacaccggaaagccatg  
aataccaacaatgtctcaatagcatctcagtggttctcggctgctcattaacaatggatactttcgtttgccaataattaccaagcttgat  
taccagcatttgggtggtcccactacagctactcgaatgccttgcgaaggatttctgctggttctgcttggacagatgacgttccattcaatagtt  
aagcttgaatttctttaatagtagcgaactcttttgatccaattcatgctctctgaaaaatcaatgtagcctcaaaaagtgctctgcttctg  
actaacttatttccattggaacatatacagatacaggtcgccatgagcttgttgtgagacagcatagagttgctctgctgtttcagcgtcaatgg  
catcagcaagtccttcaactgctcaagtcagttttccattatagaacgctctctgaaaattctccaggcaatgcataatcgcaaatcggcaa  
cttggtttctcaattgcatccaatgcttcagcaataattgccctaccgccgtgtaaatggaactctgctatgtcttcccggtaaacgacgcgggtt  
tctgaaaatagaaatcaatgctttatcaacaatttgagaccgtataggggtttttatggtttgcaaagatgccaagcgaggaggtgtacctttcc  
agtcaattttgaattacctaaaatattcgaagttagtctatgtttattgaaagtgaactgctcaccttactggcagaaggtcctgaaacacggac  
aacgaaagggtgacagacctacaggagtcgataaagcataaatctcggtaaaaattgagagatacctgaaatcgttgactactatacctc  
ttttcaatctttcatacaagaagcttcaagaccgactcgtattccctatgagcttgcgtgtagaactttgataaaagtcagaaaaaaatag  
aagcaaaataaattttaaatacaagtaataaagctcagtagagttataggtatacaaatcaatattctttcatgctacttcatatg  
ttctcactactcgttgaaatatacaataaaaaaatacaaaaaataaaaagatccttgagagaaaaaaatccaatttctcaacaaaaat  
atgtgtttttgaaaggtgatttagcgttctgtagaaaactattaactttcgttacaataaccctatttctgacacacagaattgcaggaag  
aagagtttccaacaccatctgcaaaaatgcagcaagacgaagtcatttggcaagttattggtcatgaattctgttctataggataaagtaagt  
gatacggagttagaaggatacaagtgtaacatttgagttagaggtgaagcattaaattttgcagaaatgagtaaacgcttactggactttgtaa  
tcgacagctcgttccattgcaaatctcgttatgctacagttcagaggataatggaagctgtatctgtatgaaaacaattgaaagagcaca  
ctcgcctgcaaaagttatggcaacggatcaagctgtcaagaactatacgaagccttggaaacaattaatcaaaattattgtactggcctgggcg  
tcagattcatcgttgaagcaaaagacttactcgttactcaataacttaataagagccaggaggttctttaaacaatcaacctactttaattccc  
ataaagccaagcaaaagcaccgcgaacaactagagaacgtaagctctgattgccgcaaatagaaaggaacatcgagcgagaattggtt  
gagcggcttaagagtggtgtttacgggtgatcagcctctcaactgcaacgaggaatttggcaaaaggtttgtctgctgtaggggtcgtggtgac  
gaagcgaaggaacaagaagatatcgaaaatgccgaagtcaaatgttgatgaagacgaggatgaggaggaggaagagatttctgatttaga  
agattggttgctgatcaaggtctgaagaatctgcaacttctgatgaaagcgtgaggatgaagaaactcagacgaagaagatgcgacatct  
aagaaacgtaagtctgttgaagataaaaagtctcgaagagacatggtcctcacatacagttgaatgaacgcgaacatgagactgctccgg  
ccgttcaacaagagcatgcctggtaaagggtttcaaaaaatggaattttgggttccgggttcaggtttatgcttactcttggtttaggaaa  
gggtttttgttacttattttgattactaataattactgtattatgcaaaaaccgttatttctgtagctttcaactatataatgcttata  
tcaattgtaattttatcaatccgcgtaaatcccaacaaaccaatctttcattactttttcagtcgttctagttcatttcgtaaaagaatgtttct  
tctcgaattgtctgttttctcaataatcttcaacaataacgattgtcagttccaatggactgagatgggaacatagcttcaggctttcaaaact  
acctcagcagctgtgagggtagaaggttacattttaaactcagacaacatcgggcgtttggatggatcccttgcctcatcccaaaaatcag  
actagattcaacaacgtaatttcaatgaattatctggtaggacacctgtcgtaaatctttaaatttgaagcccgtccatagccgtatcaaaag  
gatgaagaagttcaagagaaaccatacccaaaagcaaaaacatctatggcctcgatacaggaacgttacatgagacgtaatgcatcaagta



gctcaggagcagcataagtcatagtaccaacgtgctgagtagcatccattggagatatatgttgaagatctttcgaaaaagatacagactcgagc  
gtttcccttctgttcaatcaccaaaccaaaatcccccaactttgggtatagttatccaagtcattgtttccttgtcccgatagctgtacaaaggt  
acagagccacgatctactgtaagagattttgcaaaaagacattactcggccttatatcacgatgaattagatgagcgatttcatgaataaaatg  
acaccgtgcaaaaatagctcgaataaaatctatgtgaatctgagcatctatcgtggacaagggaaacgaaaccctagaatttctcgaacaaat  
atgattccaaatcgctcgtacagagttgatttgaatgtataaaataaagcaatttaacggagctatagtagaagtgtaacgaacgcttgaatca  
cctggaggttcaataatgtcatcataggaagaaccatactactcgccgaatctcgatcatgtaagagtcactggtttcgcccagcttcgggcat  
gctttctgaatataatattgtccgactgccccgatacttcagctgcgaaaaatgatactgtcgttatttgaatagtcataataaagagagcttc  
tttgttggctattgtgatggaatcttcgcgctaatgtctagagactccaggccctgtatcattctactgaagacaaggtaggcttatgtacgtttg  
gcactatttcaagaatatttctaaccaactagcatagtaccgacttgaagagcgttagtataaattagtgtagcaaaaagaaggtacttaccta  
tattgggatgatccagcttgaagacttttatttgcgaaagattttagtgaaggcatctgttgaagtaggaaatatttttcatggcatatt  
cagcgccatcgacacggttgcgacccgatatacggcgcaaaagccactttgcaaggattttagctcttcaaatcattcgcatatcgagaat  
gcttcgtatgcagccacggatcagacgtaaagctatttggttgcaatgttgggaaactagagggttgaagaagccgagattccttgaaga  
gctccttgcaattcctcataagatctctctggaatgtatcttctataggaatgggtgcttacccttgatcttctcgaacaagacccccctagct  
tgagtgattaagtgtgagagcactttgataagtcgatcgaattccagcaagttcctaataactcttcatcaacaattccaatacgttttaaag  
tttggcaaatcaagtaagagccttctggagcgagacggatcgaatcataaattcttcgaaaagggttagtatacatatgcttatacgcgca  
gatttgaacatacgacaaaagtttctagtaaagcgtaaataaaagtcttcaaaaaaagttgtagtatttgacataagattaccaccga  
gcgcatgggtgcaaaagttttaaatttggaaaagaacataccatgcctgttggtagacaattctttaaattccatcttctcgaaggataa  
agcctgatcaatagcaagagatctgtttagaggacgaagataaactaccggaattgtgatagcatttgacactttccagcaaacctctca  
agaaaggatctttaaagaataaaatacagacatcaaccctttctcgatataacctactaacctatttataaagaattcccttcaattattgt  
ttctggaaggttcaggcaatgtaaactacttttgtgtggcagctttttgtcacttggcgaagcatgggtgaacctgcattgataaacaacaa  
atagaaccaatagtaaaatataatgaaggagatgaaaggaaatgtacaagcatcttatactataattcaagataaataaataagatcgtt  
ctactttatttcttttggttctcgaatgtactctaccttgccttcaactgatccttcagagaaacgctgattccgtgaaaatagaaatcttaaaa  
aagctattctcagaacaaatttaaaaaactacggattttacataataatataatttcttcaataatagagaagtcagtaataacaaaagtc  
atatacactagcgacacatcaaaactgtatacatatctcggagtagagaagtagaaagcaaatccgttgggtccaaacgggtaggattcgt  
cgcttcaccgacgcccggggttcgactccccgcaacggaagtttttagatttactaattttttgtcttcataaatacttaccactttggt  
attatatttctctagtcacgtaaataatgatataaaatataaacatttaagagtagatactggtttaataaataattcatagggtatcatctaa  
attgccaactgaactggagtgaaccgtttctatatttagtcgtcctcttagatagggatgacattatccttgaagtagaataaattaagcttca  
gtgttttcataggaattacacgttgcgttaccaccacttgcgaactatcgtccatagcaattcgggatgaaacgaagttccaaaaatggac  
cctgttcaacagctacaaccctcttctcctatgaacaatgggtcccaaacatgaacatcctcagaattgatagacgaagcaatcggagctc  
ggataaaggttgcataaaaggttcagacgtttcgtattatgaaatctcataagatcgggtgggtcgaatagcggtagtaaacgacatggttgag  
gacaaagtaatttctagttacatcaataatcattgtctcgaacaagatgggtcgggaaacttccacctagagaatttggaaagaagaatca  
taccagcacaagtccccacataggaacccctgactaccaagcttctaattttccggagatcagggtcaatggaatgagttgccatggt  
agtagactaccgctggcaggactaggccatcgtatgtttcacaatcggcagcagctttacgggaaatgagaagacatcgtcaaaaggattca  
ggatattaatattgtcaatgaaagctccctcagggccaacacacctatacgaacctttgcgttcgaagggtcatgaacgcgagaagagctagta  
aacatagaagccgatgacatcgcatacaaatgaaagaatcaaaaaaggaggaaaagaagaataaatacaaaaaaagaaa  
actttcaaaaaataacttagggcaaaaatcaatccttctgaaacccaagcgaaaaagtttctcaataactaaccaaaaggatggccttcaa  
aaaaggtcgtttctattaacacgtccacgaaccagtgttctttattcgtaaaattcgcaggaattttctattttatatactttaaaggatccata  
gcgttgggtgccaaggtgagtttccccagtgcaaaaattatctgattagatattagcgcgtagcatttttcttaccataatgattgattggat  
aaggttaacgatgttgcgacaatgcttctcgtcaaggtgtaacaaaagagaaaaatagaaaataatatacatgtaccaccgtagcagata  
agaagttatttttagctggacctgcttattacatttgatcaggtttgctcattgtagccatcattactagcaatttcttcgcttgaacactacatt  
ctcaaaagaaagtcagctcaagcttattacgtaaactaataactacgaaagattcctcaaaagggttaaccatttttagttcaagttgattga  
cagatggctgtgcaagcaactctatcgatagcaagaatagtgatggcattgaaacaaatcgattttctatgcttcttacagtaacaaagta  
ttctcatgacttggcttcttatttctgattgaagaattactagctcctggatgttcttcaacatcaaaagtgataaccattaaatgatagtg  
aatgcttcaacctcagttatcatttcaaaagctgatcagcaaatgaattcagtttcgactgtacgctatacggcgtataaaaagaaggaaagaa  
gaaaagccgcaatcatccaactaacttttctacaaactgcttccaaagaactacctagacattccctgaaaatctgcaatacatatca  
tgactgactcaacctgtcttattcttcaagacaagctccagatcctcaaacatctcaccattcttcaatcaaaaaatactatgtatgtcattt  
gaacgaaccaacatttgttcaaatccatgaatcaaaatttgaacaaaagatgattcggcgtcttgcggtagtgcaatagcaaggaca  
ccggtcgggaaaacatagcaagccagaggcttccagcatggaccaaaaacaagattaatcggaacacctcagtgaggcgatttcagcgat

taaactgaaaagaacagatactacacttgatctaagccaaaaggcaaagagagaatactgaacatgaagtattagggccagtatatataccttt  
ttgctgcgtagaaccttaccctggaaaatactagaaggtcaatcattgggttagttgctgctctatgaatgctgtttgcaaaagtatagca  
agcataaaagtaaattataaaaatgtttattcaattttattatctgagatttaatttaaaccttgaaaaatcttctgtgagctcctaagctg  
cattacccttctcagggcgagtttgcctctttgatagctaccagtatgacctatattctgcagatttggttagggagcttctgtccttagcataaca  
ccacaactggaattaagaagctcaaagttgctcatatctttgtattctatataaaatccaagtaaagcattctttgtcttttagaaaaatt  
tccatctggagctttttacaagtagaagaagaatgtcaggaaattcagagttgaagggatttagaatccctagaacactctaaaacaggcat  
atctggttcgaaaatttaaaattaacgaattggcaatggaaaatgttgagaaaatgctcagttcattactagtggtataagtatgcgaaacg  
cgctcccagtagccataagttaggcgccttgatatcctagattccatcgtacgttagcttccagtaggcgctaaaagaataatgaatcatttgaa  
tctccagtgtagcttcttttagtggtggttggtgcaaacgtgctgaagctcactgaaagcttagttgctgatgcaatgcatcatgcccttctgctcat  
ttggtatgtgtagcgttggtattggtataaggtctgctatgttggaatctctggcccttttggttagaatgtgtgtgtctattttgatgcttctc  
ttcaattgtatagttagaagagaaagtagtctgtcagattgctgtattaaccggtttaccaattatcttagctatttgttttctactgctgtaa  
ggatgttactaacgttctgtagcctaaaatttaaaactttgtgacatattgggaaaaagcttccactttcatcaagacaaaatagaatctcttcg  
gtctaaaacaggcaggctattggctcttctgaccaggctaatactcaacacctgatactacagcttcatctgcgcaagcgaacgtagaaaatcc  
tgagctgcaaccacctcactacagaaccttctgctcctcgaaccgcaggtgcttcaaaaatgaccagcttctattctagaagcacttgct  
gcttttggcagaaggccctgcacctcatcaacctctactgctcaggcagccaactgccaagactccgcatcccctctgcccagcagca  
gcagcgagcattagccctgttccgtccgctacgacttccccttaaacctcactcctcagccggtccatcaatgctaccctatgtaccagcc  
tatggctggtattcctcctcaatgtagggcggcctacggtaccaaacccagcagctcctgctctgatacggatctcaaaaaataaatcttatt  
aatgtttggcttctcaaaacgtcccagctcctcaaatgagactattataaagctgctttccttataacgctcctttcaaggaggccctccg  
gctgcatgtctgactgcccctcagcaggaatttggaacctctacataggtctcgtagctccagctcctgcagtaaacgagctggtcgtacgc  
ctagctctcaaaatgtctattccttctgctatgctgctaatggtatgcaaaagcaaccctgatggcatgcccgtaagttagagcgtgatatt  
accattcctctgattccataaaagggtgtttaaattttcttgcgttccaaaagttaaccattgtacagtttttagctactctttcttggaggc  
attactcgagcagttcgtgagccagtggtgctgtatgttgaacgttccggtgcagttcaaagtctaattttgaatcaaatatagacatggttc  
cttaaaatgttccgtgtagagctgccgaaaagcacaagttgctatggagaatgtgcttttctgatactacaattcgcgtatgtataaacttag  
ggtttattcctctgatcgtttgtaactatattatagacaaaatgggggtgtggttttggtcccagagaatgttctgatttttagctctggagtgat  
aattcctatacgttattgactgatgccgatctacgtggcttgatcagctgaatacgggtgactgggggtcttctcactcctggtgtgtgctg  
tgacgaaccagacattgaaatcgggttaggtatttccaagctataagtaaactggttaaaccttctgtacgagctgatgacagattac  
ggggacgtaagcctttccgtggaggttacctcatcaaggagaaagacattttgatccttctgctggttgaacaatggcgggtgctatgcctagta  
atgtatataaccgggttattcttctactatgatcctaattattcttctgcatcaggttatgcaacacagcctcctggcaaccacaataatgtaa  
ggttcgcggttaattaatggaaaaaataatgggtaataatcgggtttacggttcaattgttcaagcgttgaataagaataagactatt  
gtctgtattacaaccttagagcttaataattacgttcaatttagtagcagataaccagagtaattatataatcaacgaattaatattatatacaa  
tattgaaaaaataactgggtacaaaaatgctgtcaactaatgcatatttcaaaaatgaagttactgctcagcatttaatatattgtacagttc  
ccaaagccgttcaagtttctttctggtgacaaataccagccatctaccatttgcgcaaaagcttcttctgtgtattgttcttctcaaattct  
ggccgacatcataaattaccggcgtcagaaaaagagagttcatagactgttaatactgtcattactgttgcgctgattgcgaaacagaa  
tcttcattgtctaagtcataagcccagcaaaaagggtctggttctcatctatagcttcagcgttattaatccatcgaaatctagtgggatcaaaaa  
ccatgcccccaccactgaatgccttctctagctgaaatgttgaataagtgccggttgaaggagatagggagcatcaaaatctttatagc  
gtgatcattaccctccaacattgtttgagggttatcgcaatttaccaccaaacttaggagcttccgagagctcaagtttttaataaagtag  
gctctctttttgtgaaagatttatagtttagcgttagttggtcattagatagagctccaagctgttctttgagggagtaaccgattttc  
cgattgcccttatagttataggaatcttttctgaatgttagtgatattagatacaagttatcgttcttctgctacgagtagagcttggcgaaata  
gaagaattatgtagtggttcggcacagaagaagtaagttaccttggtatccatttctgtagtcataattcacaggtagctcctcaatgcgtcta  
attctgtccgtcaccatacttgcgcacatgtctaggacgagttctgtatttactggttttctgctccgactttaaatacatctatgtctaagtaaaagt  
atgggcattctgagcttctgttcaaacggaaggtgtccatgtagcaaaatgtatggattttcttcttgaagaagatgagatgtgagaagctc  
gaattgtcatgagaataagggaagccgttctgagatacttctgatgggaaattgggtgtgttttggaggactgggggattagaagatggcg  
ctgttctattgaaagagaaggaaaaatctccttgcataaaggataagctggtctcctggggaacctttggatggaaagcaatggtggaggat  
atatacggatgctttgattaacagtttaagttcgggagcttcttacgaaaaatagtttctggttctctgctggatcaagctcaaaatcgtcca  
aaaatcatcttctctagcagaagagggggttgaagagatgattgttcgacactggaaaaggaggatttggatcgtatattctattcttctt  
gtagtatctcagaagatcggatcgggatcgtttcaaatcgttctcaaaagacgagaaatcatcaaaatcatcatacaaaagcgaattagaa  
ctataaaagatctggcagcagatctgcgtgctggttcatagtcatttccgggtgcaagggtatgtatactaggtcgaatggtagttggatgtgaa  
gcacggatggtttgattttggtctgcagaagacaaatgacttggtcgaacagctgaaactctgagttagttcccttcggaaaaatcaaaagctg

cttcatattcgtcgacacgtcctttatggttcagtcaccgtgaagctgacaaacattggaattcatcgacttgtcaagtaaaggagaattggaag  
aagggttgagggaaagagagttgagcctaccgagagagttttcgaaggaaaagtcacatcaggagtagtgcagcgttggtggtgtagc  
tatggactgagcaaacaggctaactgttcagcgtctgatgcaaaatccggatcatcgctccagctcctaattcagtcattcaaattgtcttga  
gtaggatagagagaagactagtttctaanaaggtggcttgaatttaacgccagagaaaaggttaatgaaacatagaatgccaactgttcgtaaac  
aaactctaggaagatctataggatthaaggacaaaacgaaaagatttgcagaatagaaaaagtagagaattcaataaactaacgaataaaag  
aaagcgacgagaaagcagtcgcaaatggaaagatgagaggaaagcactaggtgaaaaacaacaagcaaatccttaccaaaagtcttcctt  
ataactagaaagaaattgtaattttaacaataaacagaaagtagtctctctttttttctttttctgcttcttacttcaagtgttaagaagtg  
tggaaggggtatgtcgttaggaatccaaagcagggattcaacaagtaaccaagcactagactgatgtgtcaacatggaaggaatacatc  
ctttgaaactaaattaatgattcaactctttctgaaattgaaaccataacttttgagatgctacttgacgattttcttaggaacccatct  
aaaagacgttgggttaggaaggagaatttaggaatttatgaaaaagataattagataatccgtaagctatgtaactttgaaaccgaaacgac  
caaggccatcatcgttgacgatttcataaaactacactggaccattaatgtcttgcaaaagcttaagtagcagcagacaagttatgatcgctc  
ttcctgattctccttatgtagaatcgggggttttaacgagagaaagccttgccttgcatgtttcttaaatcatctgcaagagaaggaaacaagatt  
cctctatgtttaaagacctggtctcttcaagaaacctcaaaagaatcctttagactacgctctgcaaatccatagatacaactgttgattaa  
aaccattcagactttgtttttcttttggaaatcctgtgtttgttattaacgaacgcgttaggaacttaaggagacctgaccacaaagacaa  
ggaaaaatagcttagggaagctgggtgactccatcctaaggtgctacgaagggaaaaagctcgcgattttatataaaaaaggtgattttca  
gatctcttttctgataaaagcgtcccaatccagtgcatagaacaagactgttcagtttaccattcagaaacaactgactgtcacaagttta  
aggactgttttctaactgtcatcaatcctcgtctataaacctacgaagaacaagagaaattaaactgctctctatagattcactgca  
tttctgtcaacaacatgtcatcgttattcaggtcgaacctacgggtaaaacttatggaaggtgattctcgtatgtccaacaaaaatgttgct  
ggactcgaagccattgatggccaaaaatctaccaagacagatggaccaaaggcgaaggcgttacggtatttctgtgtatccaggaaggaa  
atgtctttgaaaaggtggtgtaacaccagatattgtccaaggggtttaaagcaagatgctgtccaagaatgagagccaacatgaaggtatt  
gatcgcagtgcaagaagattgccttcttctgctcgggtattagcatgggtatccaccaagcaacctatggcccactcactcatcttaattac  
gctattttgaaactagttacagcagatgggagaaagatttgggtgctcggcggaggtgcagacttactcccagttctatttgaggacgatgta  
ggcatttcataagttgcaacaagatgctgtgaccgcatgatccaaccttctatcctcgtttcaaaaagtgggcagacgattttctcattaa  
gcatagaaaggaaaccgcgcatcgggtatcttcttgatgacttgcgaaaaggacctaagatctgttcgcttttgtcaaagattgtgct  
tacacttttctcctcctatatacctatcatgaaaaagaaaggacatggaattaccgaagccgataaagattccagctcatccgctgga  
tattacacggaattcaactgtatgatgatcgtggtacttgggttctcaagctcctaatacccgctcgaatccatccttatgacacttctcta  
cacgcttctggcgtacaattatgagccaaggaagagcgccataaagctctttggaggcaaccacaatcccgttgaatgggcttaagaatc  
gctttctcgtgctacttacttctgtccatagttttttttctcataccttccatacttctcggcattagcatgggcattatgttctctcgtt  
ttaatattctgtcctaataatcttctgtattttggataattacttcttgcgtttgttttaatgaatttgattaatcaactcggccttctggttatttt  
cgtttgaaaagattgatcctgctatttctggtttcctaacattactttattccaacaaaaataacctgtaaccttcaatggcagtcggttaa  
acacgttcaagaagaaaaaaaacaaggcgttaagactcatacatattattatcgaatgctatcgaataaatcgaaggattgaaaagt  
tataagtcgtaactttgctaattccaactgagagatgggagatacagagacaaacatactgtaagaatcatttcttcaacagttgcaacaga  
cggttaatccataaattttacattcaaagctaggcggcgtttgggtccgcgataatgtgcatatatacctgaatattatgttagtgcctcaag  
tgtgaaacggctattctatagcaagtaacctaaagattgtaattgtaaaaaactgggtcctaaacccccagttcaacgcaactcaactggtt  
tgtctcattcaaccgacagacctttttgtcgtttccagccttcaacaaaaactcgttctccttcttggaaattcctaaaaattctcgaatgat  
tgtcattttgcgttcttttcaaacagtgccacaagagcttacgtgaaaaggtaagtaagcttaattacgtggttaactcacttccatcca  
ggcaagccagttgacgtttcttacaagataaatcaacaaaacttctgttttcaactgttctttatctgttcttaccattacgaacaatagcaga  
aagttactatctacgttcaaaagcagacttgaatcactcactacgttataattactagcagcactaaaccagaatcctctgaaaacaagt  
atcattttgaaactacatatatcagagaaaaagcattataactgtctgctgctgatgagaagaggaaggatagtaaaaagtaaaatcaaagt  
cagatatctgttaaaaagatagaatgtcatcagacgttagttaattatgatcaagaaggacatatcagatagcctagttgttaaatgagcg  
tagacataagcataataacatacaagtggaaacttttaaaatttaccacgtttgttactccttaagctcttgggcaatcttctcagccttcta  
atggcatcgtcaatggagccaacatagaaaagcagattcgggcaaggagtcgtcttaccctcaacaatttcagtgaaaggaacgaatcgtat  
ccttcaagaaaccaagcgtccctcgataccagtaaagactcagcgcagcgaagggtgagacatgaaacgctgaattttacgagcagctt  
aacagtcaactgtcagctcagacaattcgtccataccaagaatgcaatgatcctgcaaagactgtattcttgaagcatttgggacatca  
ccgcaagctttagtgcctcaccataaacacggggatccatcatacagacttgagtcagagaggatcaacggcagggtagataccaagct  
cagaaataccacgggacaagacagtagtagatccaagtgagcgaaggttagtagcaggagcaggatcggtaagtcacagctgggacataa  
acagcttgacggaagtaattgaaacttcttggtagtgtaatacgccttgcatagcacccatcagtggaactgtgggttggtaaccgaca  
cgagaggggatacgaaccaagcaaggcagatacctcagaaccggcttagtgaaacggaaaaatgttatcaatgaaaaacaagacatcttggcct

tcaacgtcacggaatattcggcgacagtcaaaccagtc aaagcaacacgggcacgagcacctgggggttcattcatttgaccgaagacaaga  
gcagccttgagtcgctccaattgatgacaccggtttctgcttctggtgacaaagtcattaccctcacgggtacgttcaccaacaccgcaga  
aacagagtaaccacatgagccttagcaatgttggatcaactcttgaataaaaacagtcctaccgacaccggcaccaccgaaaagaccaat  
ttaccaccacgggcataaggggcaagcaaatcgacgactttaataccggtttccaaaactcgggagtagtagattgatctgcaagaagga  
gcatcagcatgaataggggagtagttgacagcatcgatggggccagttcatcgacaggtcaccaatgacgttcatgatacgacctaagacc  
aggaccgacgggaactaaggagcaccggtatcaataacatcggtaccagctaccaaacctcagttaccatccatagcaatagtagcgac  
ggtgtttcaccgacgtgtgggcaactccaatacaacacgcttgcggccatattcacctccaagcgggtcaaaaactaggtaaagattcaga  
atttcaaatgacagtcacaacggcaccgataactgtttaatggtaccctgttcttctagcggcttcgtagaagcacatctaaggctgca  
aatttgcggcatttagccatgatttttagagtttgaatctgttcgtaacaaaggggattttgtgctaaagaaaactggcgaagtcgctaag  
cgctgttcttcagcatcttgaagcggtaggttcttccgatcggtgcaagggtgagttataatccatgtaacaagccataggtcctatgtcc  
gtaaccaacttacataaaaaatacaatagatatataataaaaacttttataatccatcaaatctttgtatatttctgtttattctttgtt  
accgatgttactttgaaattgctgaaccaaggtcaagctcggatgtaaaaagtcaaaaaacgctttccgctgtatttaaaacaatgattta  
tttaacaaatcttcttcaatcttggattataatgaaatgggtttttaccattaagtctggactaccgcggtgggtccacgaacaggcgcg  
tacagtgaacggatataagctggcggtcctgaaaccaagctcgatgtgaagaacctcaaggttcagtattatgcttcatttttatgaatt  
acgaattgtttatgcttacctatttcaaattttcaataatattgtgctacttttcttcttcaactgtcaatagaatagagaaatcgagttt  
attataattcacaacgtatatttctgataatcaatcgtaacaagttatctctcagagttcgagttcgtaacaaactttgatcatgaataatgg  
aaattaaaaatataataggtactgaaagaatattgcttcagaaacctcacaacactccttctcggcatcataatgttagagttacat  
acagtagaatagcgtatgattcaatacaataaagagtagtaagggaagtcctacatcaataattcctaaagagggttagcttttctaaaagt  
gacatgacgaattatacacatactcaggactataattgagaaaataggtcatcaggatattcgacaccactcgatgtcgatgacaaaaacat  
ttgcagagctccttcaattctcaatgatcgggtgcaagcgtgaacaacatccaataactttctccgcaagccagaaaatcggtgaagaa  
acgtcttttctgtaatgaccggtatttctcaggaaaatctcagcaaatcttctcagtgtaagccttctgagggaacaaaatttaaatcattcag  
cattcgcattttctgacatcgataccgcaggattaaagaactgtgatgttccacagcacgctgtcgaacggaagaccaaaccattaaagccttct  
tctcaagctcagtttctggagttcaatcttccggtcgttccagtaattgccataacacacggtgtcggtcgacaaatttgccaaatctcggca  
tattgcacccaaggtcggtaatggagcatctcctactctgccagcaatggatcattggatttccaggccgagtcagccatattgacggtt  
cctgatattcaattgagcatgaagtagacggcttgaccagtcaaaaaccttcaatgttatgtgtaatgactttaattcctacgttgataacttaa  
cgtattgcaaaaagggaaggccttctcgttcatcaataggctcataatattccgatataattcaacacgcttttgtaaactactaatgcttct  
ctgcatcaaacctcgtaatcaggcctctagcttttaaacatgtttgtgaaaagctacaggaagggtcagtaaagtaaaggttaactata  
aaaataaagttatgacttacggcttcatcagtacacgctttcaaaaacattatacctaaactttccttggtaattcggtcatatattaattt  
cttctttaaagctagagttgggtgcatcaataacaccgattacacatttctgttcagtaaccaacgcaataggtttcaagagttccatggctag  
atattctgaaaattgctaattcctgatttcaagtcgaagaatggagcagacatggaatattgctcgtccttctcagacggttatcaccaa  
cactgaagaatcgacaattatacctaagccaattataatagcgaacaagcctaagttaacaatgtattgacacctgaggaataatttctaga  
gacatactggaaccgatatacacttctgttgcgggaattcccacaagcacaatcaccaacttttctaatgccgtaggatccacaattcatt  
tcatttcagctttccgggatacggcagaccaggaatatacattgttactctggcggtcgtgtttggcaatcttctggttttactcctaag  
gagtagatccacatcttctctgtaggaaggaaataactactagtagtttttctgacatcatataacagaggaggcttcggacttaaa  
tcttcgagctttatgcttcttttttaggtattgattataccggaatggatctcttagtcgccaatgatggccttcgaggcttccgttccgggtt  
ccttggtcgggtgtacaattcaggagaaaactgtactttttgatttcttcgcagaattgcttccggaattggaactatcgacaaattgccatt  
gccatgcttattaaagaacattgcttcaatgtttacttcttattgttttcttcaactagccaaatcaattgacttccggttcaattcacgt  
tcgacttcttcagaagttcaataagcgacaaaagcgacgagcgaactgttagtaattgttatgttcttgacagaaattggtccttctt  
tcatatagcttaattgtagtattggacaggtgatcactcatccacttcttctacctagtagtatggacaggttaacattgactggctctagat  
attgtattccgtagtagatgctgtttatttatcagtgatacaaacatacaaggaaacaaaacataaagcagaatggttcatgatgatatt  
aaatttaaatggattcagttacaaaataagcttatttatatggatgaatgtctatttacagatatctattcatcaatagttattttattactg  
ctcgtgtccaaattgaaccgtttgtatttctgtctgctgattagaatgaattgatagtaaattgaatagtagttgaggttgatttttcat  
agtatcattttattctgctgatgaatgttcttggatggatagaaatggatttctactatacgtacagcatagtcatactatagaattgagcatac  
aaacatagaatcaaatcactgcagggacaaaacaaaaggatatttttttctatctgtaatacttaacaacatgtatattaactcatgaac  
gaaaatcatgtttgagcataaaagtcaataaaatagttacatatacttacttattcaacaaaacaatcgcgcaggcctagcagaaaag  
ggtccacacaaaacacttagaaagagcggcttctctagttaccgtctatgctcgtttttctgaggaaatttcttgaagacttctctggt  
gcatattgtcgtatctcataggaatctgtaacctatcagtaacataatccaccacaccggcagctgctcgattggcaataactctagctggccc  
tatcattctgtcgcataaagaatatacaataaggacctcctaactagaagcataaaaaagaaggggttcgaagaacggccattaattcgt

tccatccaagtacccaaaagcaatgcccaaaagtatggtggaatcctgtttgtgtactcacgagagatcgcttacaatccaaatatcaaatccg  
ctgttctctaaggttacagaagacttgagactcgcttccgattttaaattgtcaaaaattcagtaggagttgaaaatgaggaatcaatctcttc  
acgtcaattccaagttcaggaattcttccatccgaatacttgatacaggaaagaactgtatcaattccaacgtcttgtaaacactatctctgtaac  
gcgatcaagcgtgctgacttttgaagagcttggcatgccatcagaatcatatcgaaatgttcttcaaaaaacatgcgcaatcgctgctgaag  
aagaacatcagacatttcaagcgcaaccttctccgaaatgcaatccatgagctttttaaagtcagatgtagcttgggttaattccggttctg  
ttgaatccataaagagaggaaatagacgagtaatctcatccgtagcctgcttttgattgtcaaaagttcatcgagcaaacatcccaacttaa  
gattaggctttgaagtgcaattcaagtattccgcaaccgagttccagggtagtagcatttctgtattttagaagacaattttgcttgcaa  
acagaattacaagagcttctaactcttccgataatttaagcaagaattgctttgagtcctcaatcaatattagcaatcattagagattgagcctct  
cttgcatagcagtttagattttcgatttcttagcagctaatccttaaatggtctgttacacgggaaatttcggccgtttcataaatgaactgac  
taactcttttgcaaagcattcaattgagcctggaaaaagacatacaaaagatgtatccacgctccgtaataattctgtttcttttctcataaatgg  
cgttattatacctcttagctgtgatcgaatcttccataacttgatcaaacatttctgcatacgaattggcaagtttcacaaatgttctctgtaa  
gaattcactttgtaaaatgttacaagcttctgtaaaaggtccatagcttccgctatgatttcatcacagcgatattgtgccagaagctgctgttg  
tgggcaagcaagatcttattttcaatggttccatatttctctgtgatacagaaaaatccgctgcaggaatacgttgtgtagctagga  
tcaaatacataatcgggagcatcgttctgcaaatcttctgcaagtgagcaaccgctgatcaaatgcttctgaacaaagtattttatgggga  
agcccagtaaatccaaggtcaaagaagtcgtaactttagaaccttccaagccaggggttctgtagcgaagaccagacgttcatcaaatctgt  
ctttatcgttccagacaaatcttcatagacgtagtgcctatgtaacagaaattacaattgaagtaagcttcttcttcttgcgtggaacagttg  
aagatggacttctaacacagttttagtaaaacatattagaccttgataaagcctacttgatgtcccacatgttcacgatgattacttcaacta  
gtagcgatcgaataatagagctgactttcgttcaaaatcctttaaagatcattagtaaaacatattccatcaatgcttatacaatagccactataaa  
aaatctaacagcttttatcaaatcatacatacctgatcatcacctcgttcacggccatcagttccctctacatacaaaagatgggagattctt  
gagccttgacagccagataccttacatgtaactaccaacatccttccctacataaaaactgacaatacctttgttgttctgtcttttaccag  
catccataacatcgaacgttgaccgaacaattggttcaatagcgtaccttctttagttagtcaactttaaagaagcaaaaaacacaaga  
aaaccatactttgcccgtagactgagaaccaagacagcaactacatgataattaaaccagcatctgccaagttacctgtcgcgatgaattga  
ggtatccttattaaatgatttattctcatcaacaatttgcgtacagatccttggaggaccattttaaagtgatggtgttggggaagaaaagta  
tccaaaatagctagctcactacaacaatgttctttaggttttagtttgcgaaaaggaatattgctgtttaaaggttcaatttttaataacca  
aactcgaagaaaacaaaacaaaagctaaaccataacctcggcgacttgacttggactcagcattcaactaaagaaatataaggt  
gtaacttaagttactggctttgttgcattgtattaccttttcatataaaactacggcgtttatgagatccaaatcctttagcttgggttactcc  
tcaagtggtttctccaccgaaaacaggtaataggagaagagaatacttcaacttctagaattaagctataagaatcgactgctatttaccttgc  
tacgaatcggacttgttagaccttcttgaacataattcagtgatccctgtgtacgtaccggattcctccaacaagaagcactgaaacgaaa  
ctcgtcatttacttctcgaattcatctgcaatggattctctacatgacacatgtgaatttcttcttgaacaatatacttctcaatccttatttctt  
ttgaccgctccttctttagtatagcaatgctcaagctcaaagtagttacaaaagacttctatttaaaacatgaagcgttctgattctttttgtt  
attagaacatattcttcttatttcttgttttttttcttcttataatcttccgctgacacggtagctcatcttcaacgtt  
cacctataaaaaatggcaaaagcaaaagaggtgaaacccaaaagtgttaaaggagaagagggtacaagaatataaagcaaaaaag  
aaaaccgtctcacacgcttttagtgaaaaactgatccatgactatttaccgagaacaaatcgccctctcagctagtaagcagcgttactttat  
tcgttaaccattattaacaacttcaagcggatattagtgcaaatgaaaaacgctgttactaaacaggtagcgaagattttagagcaattg  
cgcgacaatggccaaatacaggaataataggttaacatagtagtatttactataaaactaattcaattcaaggaaacaaagcgtttacgta  
tccctcaagattgcttggagagcatcttctgaccaactaatggatttggatcgcaaatccaaattttaaagaggatcttgaaggcgtaaag  
gaggactacaaaatgaagtcaacaggtattaaattcgaagctctggattcttctgctgtaataatctaaacttggcttgccttgaactaagta  
attggagttattaactgaacgatagaattcaaattttaacaattctcctagctcgtcgtgaaatacaaaaaaattcttacttggataagatat  
tgaagaaacgagtacaaagttggagtgctgcaatctggttccataaaaaatgttaccggaggagatgaaagatacattatcaaatcatgact  
ttgttaaaaaaggttacttggaaacgaagaaaaatgttttcaattatggaacctcattacagattgcttgaaccccaaggaattatgggaaa  
agttgggtttgaaaaagatgagattactgaggttaataaatagctgaaacccttcttatttttaaggtttacacctttaaactgttctttaa  
ctttacgatttacgcatctagaaaagtcaattcatcgatttatatcattatttagttcataataataatgaaaaccataagcctattttgagaat  
aatgtagaaattcaatttggaaacgtcaatagctttagacaataggaataatacaagatggtttaaataatcatgtaggtcgtattggga  
acttttcttgcgtatactttctgcaattgcttggaaagattttcattcctaaattacattatcataaacggttgcacgttactcgtattgacca  
aagttttcaggcttggctgagctgtagctttttatggcgatttcgagaaatacatagacttcttcttactcctcaaggattttgctc  
ctcagaaaagttgtcggagagctccttaccattgtataaaggttatgggttcaagcgggtcgaattcaacaaagtattgacctcctcgtctggata  
agttggattgtcatcacttttaacaatttccatgcctttctctgatagagaaagcatgtcagcaacgtagcttattggttaaagaccgaaa  
atcttcttaatttatgtatctgatccttggaaattgtccagagaaaaagataaaaaggatagcattatcctaaagaaatgttaataagta

ttccaactgtttttacttcttaaataaagcttaccgtctcaaacttaaccagttctctttaaaactgctcgaagaggatgaatgccttttggta  
ggcatctatgtagcttctgtagggagccataaaaagctttaaagggtaaaagattaccacaagtagtggaaatattaggatattctctgcataaaaag  
ttaaacaacaaagcaaagtaaactgtttttgcatacctttccattcagtcgaaggtgaagcaaaaaagctaaataaagcccttcatgaaa  
gacagtcaaagccgtaacgggaagatatacaatctgcagaatcgattaaagggtgaaggggaagctggaagatttagctagcataccgaaaa  
agccatccttgagcttcatataactcattattaccaagacaatgataggcagccaataaacagctactcagtagtaaatggctggtagatactat  
gaaaagttagaagcctaggaatccacgaactgcttcaaagacacgacatgctaattctatgatcatcacaatctttatgatggacatactttgc  
tgatgggtcccaacgtaaagtgtatgcagctacagcatactgctttgacgcaaaagtctttgagaaaacagacatgaatcacagatatggta  
ggctgttgagcggcatgagaaatagcttcaaggacgagattgtattctaaatagagctattaataaaaagatcagaaatcataagaatgctaacg  
tccgttatacctctgagtcctgtaaataatattctttcactaaatgatccattgcagcagttactttcatacgattattagacatcttattacaaaa  
gagagcaattcattccttattccataccataattccatgtgaattacattcttcaagagaactactcgaacaaagtgtataaaatcaagaagca  
atgtctcaggatcttctaaagggttaaaggaaatgtatgatccatattcaatatacaataaattgcatcgtttaaattacagacaaaggttcagaat  
ggcaatctctcgtttgttctaatgtgactgtaatagtttagcatacgaatcgcagacaaagtgaacatcattaagcagggttattcctaaact  
ttgatatgaaagaactttacagaaaaatctatgtaagtcttgcctttcaattaaggtttgttataatagagattttattattattgaattat  
acgccgatcaaaaaaggtttctaactgcagctagaagcttaacaataaaaataaataaacgcgacaagattcatctttattagctctacattta  
ataagataacaagatttcaaaccgacgcaataggtaggagccttctgcatagccctcataaaatatagactcaaatcaaataccggcaaa  
actgaaaattttagctccaccagttttataatccagacaaggcttttgggtatactgataaaaaagtaacaggaaaaaggaaaaaaaca  
aacgaacatagggaaacatctgcaaacacaatgcaaaataaataaacgggaaagagaagcaaaacaattgtaagacattttttcgaagaa  
tagaagcatgtcttataaccagcacaacatcaggatcatttgcactgagactatttaataacagagaaactttctgaaagacctcttgaag  
agacctttttctttttgagggtgttctgtcctggctgtttacaggcatagccgcttagccggagttgtagtttcataatggtaaggttgaag  
ctgttattgtttttttatagcagctttcataataatgactgacggctttgggtattctgcaattatattggcctgagaagcccttggcgt  
aatttgactggcggattttgataaagtaactatagcagctgtcttgggaacacgaggctttgataaatattgatctgcactcgcggtaactgcgt  
tcgctgtccgaatcattcatataaggatcatccgatttgtatgcacgcctgaagcctgcatattaccacctggaaaatccacatccgtgaaaaag  
ggacgtcagcatcctgattgtcgcgttctgtatccaatattctgctcgaacgcaggagcattagcatattggacggactaagtatcgagaa  
gtaggtgatcctcgaagcgtattcattggatgcatatgatgactgtttccagaaaactggcagtttagcgggttatgattagcttcttgcctaa  
gaacattgaaaacgaggattctggtctgttatttgggaaacacgcatgggtgtccattctggataccagtttcgagtcattggttcattcgg  
gcttgaaattttgaattccttctcctccatttccgaagtctgaaaaccttgatgctaccagactcaaaatcaggatccgtaaaccgatt  
gttaaagtcattgtttgtaggaacatcatttcatctgcaaacgagcaggatctgtagtatttctgctgcctactgaatctgctagaaggtg  
agcctgaccgacgaattccagctggtgagctgttcgattcgaataaccttctgtagcatttttggggtactaaagggaaattcgtgttccactt  
gttcggtttcagactccaatttagcccaactggaacacctacatcttgatgactccttctacttaagcgcgctcgtctaatgatgggagttgtc  
ttttagctcagttgaagcaacagtttaagttatttctgtcgaacgtcctttattgaatgaagctagtcctgctccgttgaatcccgacttggcgg  
ctccatgtcgccttccatgatgatgcatthaagccattttgaaaatcatcatagtgactccaccgacgacgatccattatccgactctactttgg  
ctggttgacgacgaaccagtgattgagcatggcggagttttgagatattcattcgacgaaccctccaaaaatggggcttattattatagcctg  
aactgttgattcattcttttaggctccaacatccagtcattgcccaccaattctgatccttgacaattatctctcagcagagaatctgtttctcacaca  
aaaccgttctgctgcaattgtctctaatttcttgttaaaataacttaaaataatgctaattttactttttgaaattattgctcaaaaagcggct  
cacgctcagttcacgatgtttacatgctcctgaccgtatgctacaataaagttaaaggtaacataagacaaaaacatcatatacgaaggtgac  
atcacgttgaacaaaagcaaggtgtaataccaagcaaaagccgtttctctacaaacgctcctcgtctacctatcgttaaatcattttgggtcata  
taacatcggctgtaatttccagggaggagggttaacagtgatcattgcaaacgagttggaatcagaaggataaatcactaagtgtttctttttt  
ctgttttttttttaaaattcgaatcgaccatataatatacatattcttctgtaactcttattgcaactgtgtcaacagaggacaaaagcaataa  
taactgacaaggatgtaatcaggaaataggtttgttttctgataactgcccgccttttattttcagctgtcgaatgaagagcaagcatgat  
taaagaggataatcagtagagtaaatcaaccatagtgatcatattgattatttgcgaactctgaagggcttatactgaaatttatctcgatg  
aagcgattactgtcaatagacatcaataaacactttggatgaaatgacaataaaaatcgaatcaaggattttatagcctgaaacattcaataac  
atgtttctttattgttggctcaaagttcacctatttgatcgtgggcagcttatcatgacaattgtttatgggcatagaaaaaaagcatgttaaaa  
aatggtgaaacgacaaacacaactgggaagaagggttaacaggtaaagaagattcttaagtagttaggaaatagaagtaaagctagctc  
aactcgagaaaagatggacttttcataaacataaataaccaaacttaagcgcactgtgaaaggaatataatcaaaacagaaaacggttct  
tctttcattcgataaaacaaaaagtaatgagttaggatttttttatcttggcagctgtatctccataattttggatttttcaaaacaatcactcaa  
tccaatfaatgaattaataaagatacagatagttgatgcaaaaaaaataataataataaaaaaaatgaacaataagagcaga  
aaaaagtttcaaagcatagctataggtcaccaatttatcaaaaatagtaggttatgctaacaacatggatgcctaataaattaacttttgaag  
caggaacaggttgaaggatcggtgtttatgaagatgaacgggagaaagaactctgaagctgtagaggatgtgacgggatattatcactatcc

ttc gat gata aagg g g a g a g c c t c a g c a g c a g a a t t a a t g a a t c g c c t t g a t t c c t t t c c t t g a c t t g t g a t t c g a g c a t t t c t a c g g a a a t g a t t  
t g a g t g t t t c c c g t c g c g a c g g t t c c a g t c t g c t t a t t t t c a t a a a a g c g a t t a t g a t t a g a a t a a c c a t t c g g c a t a t a t c c a t a a a g a t c a a  
g g t a a g a c g g t g g t a a g t a g t t a g a t t a t t c a t a t a a t t t g c a t a g g c a t a c g g a t c c a c a a a t g t a c a a g g t a t t a t a g g g a g a g a t t g t c a a  
a c a a g g c a c t a t t g t c t a c g t t c g g t a a a g c t g t a g t a a c g a a a g g a g g g g c a t a a a a g t a a g a g a a t c a t a a a c c a a t t a t t t g a g a a a g  
g t c t g g a g g a g a g t t t g a g a a a c t t g c a t c g g a a c c c a g c g a t g c a c t a t t a g t t t c a g c a a g t a a t t c a t g a a c a t a g c t c t c c a t a t a c a a g g t  
a t t t t c t a a a g g g g a a a t a c a a a c t g t g a a c a a g c a t c g t t a a g t a t a a t t c t g a c t t a g g t a a c g a a a a g c t c g g c g a a a t t c a a g c t g t a  
g a c c c t t g a c g g t a a t a t c a t c t g c c g t a t t a g c c a a g t t t c g a a g g t t c g a a a g g g c t c t c a c a c a t a a a c a g t a t t c a g t t g g a a t t g c c a  
g c c t t g g c a c g c t t t g a a a g a a t t g t a c c a t g a c g c a c g g a t a a t a c g g a g t g a t c a t a a t c a a a a g a t a c c a a a a a a c g a a a a a t t c  
a a t a a a a a a g t a c c a a g a g a c t c c c t g t t t c a t c a c c g a a t c c c g a a a t t a g c t c a g g a t a c t c a a a a a g a a a c a t t a a g t c t t c a t t g a  
g a g t t a a g t t c g t t g t a g a t g a g g a a t c a t t t g t a a g t a g t a g c t a g g a g g t c c t t t t c t g t a a a a g t t a t a c c a t g c a g c t g a t t g t  
a t a a g a a g t g a g a g t a c c g t t t c c g c g c a t c a t t t a g a c a c t t t t t t a g c c a g t a t t g a t c a t c a c t a t t a g a g g c g g a c a c g a g g a t c a  
g a a a g t a c g t a a g t c c g c a t c a a c t t g g t a t t a a a g t a g a a a t t g t t t g t t a a t g t t a c a a t c g c a t g a c a g a c t t a a t t c t g a t c c c a a c t t t  
g a c g a t t g g a a c t t t a g c a g t a g a a t a c a a a c g a c c t t t t c a t a c c a a t t c a g c a a a g c a g a a g a t a t t g g c a g g t g g t a g g g c c g g t t  
g a g a c g g a t c a g t c a t t a t a c a t a a a t c g a t a t c t g c g t t a t c a g c a a g t a a a g a c t c g g t g g a t c c a a c a g a a c t g t c t t a t a t t c t t t c  
a g g c c a t t t t t c t g g a g t a t g c c t c c a a c t t g c g a a c a a t t g a t a t c g t t t t t g t a c c a c a t t c t g t c c a a g a c a a t c g a a t g a a g t a c t c g t  
t t a a c t g a g a t g t c a a g t c t g t a t c c a c a t c c g a t a a c g g t t g t a a a g a t a a a g g a t t a a a g g a g t a a a g g a t c t g t c t a a a c t a t a c g  
g a a t a c g t c g a c g a t a t t g a t a c a a c g g g t t c g t a c t t a c a a c c g c g t a a c g g a g a c a a g t t c a t t g a t a c a a c t t t c t c a g t c t c a a  
g g a t a c g t a a c t g t c a t t c a g c t a t t t c g t a a a t a c c t a c t a g a a a g c t t t a g t c t t a c c a a a a c c g t t c g a a t c a g t t c t c g g c t t t c a a  
a t g c g t t c a a c a a g a c a a g g c g a g c t a a a a c a c a g t t c a a t c t t c t a g c a g g t a a c t a c a c g a g a c t c t t c t t c t g a t a g c a g a g c g a a  
t t t c a t g c t t t a t t a c g t a a a g t t g t c a a t c t c a a a a t t t c a c c a g t g t t g g t a t a g a c a a g t g a c t t t t g t c t t c a t t c a a t g g a t a g g c a  
a t a t g g a g g a c c a t a a c a a g a a a c t c a t g t a g t g a t a t t a g g c a c a c a g t g c c a a a g t a t g t g a c a t t g g c c t t g a t g t c a a g g a t g a t a g  
t a a c g a g g t a c t a t t c g t a t c g t t a c a t t a t g t a a t t a c t a t a a t c a t c a g t c t c t a c t t g g c a g a c t t t c a a t g a a t g a a g t a t c a c c g a a t c  
a t t a t t a c c t c a a t g t a t t g a a g c a t a c t t a g t a t t c t c t a g c t c a c c t t c a g a g t t a a a g t g a t a a a a t t g g a c a a g c c a a g a a c t c g a a t c t  
g g g a c c t c t t c a t g t a g g a a g c g t g a t a a c c a t c t a c a c c a t a c c c t t c t a t a a a a a t a c t g a c c a t a g t c c t a t a t a t a c g t t a t a g c c  
t t t g a t t c a a a c a a t t a a c t g a t a c c t a g c c a c t a c t c a c a a t t a t g a t t g t a g t a a a a t c a a t c c a g c c t c a a a c a a t a c a t t c a a c a g  
c a a c t t c a t c t a a c t t t t c t a t a t t a g a a a c t c c c a t t a a t t a g a t c a a g c a t t t t t a c a c a c a c t a t a a t t a a a g a a g t a c a c g t c a g  
a a a a c g c c a a c t a c c t a c a t a t c a t g a c c a a a a g g a a c a t g a c a t g c a a g a g a t c a t c g c c t t g a a c a g a t g t a t a a t g c a g c t t t a t c c t t  
t a a g g a t c c a a c t a c t a a g a t c a t t c a g t a a g a a g t a t t a t c t a c t c t t c g g g c a a t g g c g t a c c a a t c a t c a t c c g t g t t g a g t t c t g t g g  
c t a g g t t a g g a a c c c a a g c g g a c g t a t a c t a t a g a a t g a t c c t a t g g a g t a t c g t c a t g g t t t c a a t g a g c g a a a g c a g t g g t a t t t a t a  
c t a t t c g t c a c c a a a a g c a g t c a c a c c g a c a a a a g c a g t c a c g a a a c a g t c a t c a t c a g c g a a t c a a t c t g a t a c a c g t c a c c g t a t  
a g a a a a t g t t t g g a a g t g c a c a a g a t g c g c a g t a c a g a c a a a a t a g t t a c a g a t g g t t a c t a g a g c t c g g t a t t a a g a g a a a a a g t t  
t g c a t t t t a t g t c t g g a a a a g c t t g t g a a t t t g t t t t t t a a t a a a a g t a a t a a a a a a a a a a g a a t c g g t t t t t c t t a t g t g t a g g t g c t t t c  
a a a a g t t g t a c t t t t g c a c t t t a g g t g c t t g a c c t t c c t g t c t a c t a c t t t t a g t a c t t a c a c c a a c t a a c c a a c g a g g a a a t t g g g a a t c a t  
g t c a g a a a c g a c a t c t g t g a a c a t g t a t g t t g a a a a t c t a g a g g g a c a t t a t g t a a t a g a a t a g c c a g a g t t g g a a t c c c c c t g t c g a g a g  
g g t t g a g t t g g a a t c a a t g c t t g t a t g a a t a t a a a a g c a t t g t c g t g a t t c a c a a a t g t a g g c a c t a t a g g t a a g g t t t t t g g a t t t t t  
a g t t g t c t c a g t g a a a g c a t g a a c c t t g t g t a a t t g a a g a c t a c g g a a a a a a t a t t a c t t t t t t c t g t a g t t c a a c t t t g g c a a t t g a t t  
g t t a t t a t a g c g a g t c c a c g t a a t a c t t t c t a g g t c a a c t t g t g g g c a t t g a c a t c g a c g g t t t t g c a a g t a g t a g t a g t t t g a a t c c c c t t c t  
g t c c t t g a a a a c g a g g a a t c g g c t g t a a a a g t c t g t t c a g g a a g a g c a g t c a a g t c a t a c c a a g a g t a c t t t g a a t c g t a t g a a t a c t t g  
g g t g c t t a c t g g t c a c g t t g g t t g g t a c c a a g g a a c c a t a t g t t g g a g c t t t c t t a a c a g t t c t t t c t t c g t t g a g a c c a a t a t g c t t a t c a a a g  
g a g a g c c c a a t a g c a t t g c t c t c g t t a t g a t t a t c a c a g t c t t g c a a t g g a t c t t t g a t t c c g t g a c t t c a a c t a c t c t g a g t t a t g g c t g  
c a t a t g a g a a a a g a c a t g g a c t g t a c t t c t a a a c a a g c a c a t g t t c a c c g c t a a c a t t g t g c g t g a a t t a c t g t t g c a a t c c a a c t c  
g c a c t t g g c a a c t t g t c t t c t c a c t c t t a g t g a c c t t c a a a c c c t g t c t t t g c t t t c a t c c g a a g c t g c t t g a c t c a a t g g a g c g c g a a t t g  
c c t t g a c t g a a a c t t t a g c a a t t c g a t c t c a a c c t t g g a g t t g g t c a c a a a a g a a t c t c g a a c a t c t c t a g a g t c t g t c g a t g a a t a c c a t t a  
t g a g c a a g g t a a t g t t g g t t c c a c a a c g t c a a c t t g c c a g a g a g c a g g c c a a g a t t c a g c a a t g g t t a c c a a g a g a a a g g c t g a a a a t g c c  
a a t c g t g c t g c a g a a a a c c g t c t c t t g c c t t a g a c g a a t g g a a g c g c a t c t t a a g c t t c t g t g a a c c t g t c t t c t c g a c t c t t t g t a a t a  
a g t g t c a a a t t c g t a t g t c g a t a a a c a a t a a c g t t t g t g c t t t a c t a a t c a t t a t t a g g t c a a c a c t g c t c a a g t t a t g a g c a a a g c t t g t  
c g t t t g a t c t a a a t t a t c t g g t g t c g t a a c g c t t a c t t c t a g a t t a a t a a a a g a a c g g t g g c t t t g a t t t g t a g a c c t g t g a a t g  
t a t t t t t c g t a a t c g t t a g t g c t t t t g c a t t a a c t g g t a g g t g g t t g a a a a g c a t t a t t t t t t t t g c t t c a g g c t a g a a a g t t t t g t c t a a g c a

agggttagttgagtagtacagtaaaataacaaatgccaattaagattttcttatccacaattgccagacctttactgaatcggatagttcacattta  
ttctaagacctgagtagataatcacatgaatacgaatccgttcacaaaagttctaactacaaaaattatcgtataacttgatttgatttactttccat  
gctataatagcttagtcaatataagtaattgtttttttttgttaaaaacgttaacataaacaagtaaatgtgttcgtactacaactactgaaactg  
tgtttacttctttgtttactttaaggggttacgcattttgtctaccataaccaccacccatccatagcaagaatcttaacatttcaaccacgtttgaa  
tgatggaaaatccacaatctgttcagttaaataattatgttggaagcaattcgagattcaatgaacatatagtaactaactattaggcttcgattc  
cattacttccaaatcaaccgtaaattagtcgccgtggattcaatttaacgttatggtagtgggatgcttttctatagcattctattataatgta  
taagctgctaattgaatttcaaaggctcttctggaagtggaagagtacacttgtaataccttattctctgctcatttaatagaacagcaaaggccg  
agttgatattcagactccatatacgcagactactgagattaatgttaccagtcaggttaggtattcttgatctcgagtttcatgtactttctgctat  
aactacgcgttggaagttcgagtttcccccttttacaatccaatttataattactaactaataacttaattagcggatcatgaaaatcggttcaatt  
gcagttaaatctcattgatacacctggttacggcgaccaataaacaatgacaatggtaagtggagacgaggactagatgaatatacaaaa  
atcttaaaagttgggaacctattgtcaagtagcattctgtatcaacattcttctatttgcagctgaattaaactctcatcgtgaaaagcgttcaa  
gacaccagagtgattgctgtctattctttattctgccactggctattctttacgccctattgatattgctgtctgaaacgccttactgagctcgtaa  
acgtcgttctgtaatcgcaagtcagactcttaactctcgaagagcgcggtgcttcaagcaacagattagagaagagattgcaaagcatgat  
attaaattgtatcctatgatagcagatgatattgatgatgaagagctaagccttaatgcagccgttcgtaattctattccgtttgctgttgcggctca  
gaaaagaatattattgctgatggaaagcctattctgtggacgacagaacagatgggggtgctgtaattgctgatgatgaaaaccactgtgaattgtt  
ttccttctgaacttttaatgcgactcatttgcagatcttatagaaactacttcttatatcactatgaaagattccgttccaaacaactcagcagc  
ttaaaggaacaatctccatggcctctagaatggcaagtcctactcctacttccctactgacctctcaccatctgctactatcgaaattagtc  
tttttatttcaacttttcgacaagcattaatattcaataatataattagtttattctatctcaatttattctaaggtaattgggacaaaatcttagtaa  
ccgaattttctgttcatccaacctaatgtcaaaaaaacatctaatgtacagatttattacttagtaaatcctattgtacaatctcactgttgtt  
aacattcgaatcaaaagatttgcataatgtaagtgctggcctatcaggttcggtacattccataaagcaattaacagaagacggctgtaatagc  
cctggacttggacagcacttggccttcttctatgaggaaggtatttgcacgacatagagcactggtaaacagaataagtgatagcgcg  
gagtagagcaatcctcttgagctagaattgaagcgttcaagtaaatcattactgtttctgtcaaagcgtgaccaatacaatctaaagccttga  
atgtcactgttgaagaattcgaatatagaggaaagcgtggaattcgtccctcaagaaacgatacgttcaagatgaacattccacagcgaaggt  
tgtgataatattcttcttcttaaaaagagtgctgaaattgccgattgtttcgaacgttaataacttcagacatgcatagaccgtcaaaccc  
ccatacattttgacgcggttaaaaagcaagaactgactcacgaattaccattgctagtaacgtatttcaaaaattagatcgaacagcagaagacc  
aactcaacttctgaaagcattattaacaaaataaaaatcgagtttgggaggcttaattggctcacagctagcaaggcacaacgtaacaatgatt  
caaaggaatttgggttggatagtagtacgtaaaagccttaacaatacaacaataagcgttacagttgtccaaacgcttagctgcagtaaatgca  
agtaatgagtaattgatacacggtatagattgagctaaactggggcacagattttaaaccataaaatgcaaagcaatcgcatcttcaaattcaaatc  
aacaatagatggtacaacataatgaaaataaaaaggagaaacttcaaaaattggagagggcatcgtgactaaattagaagcgtggaaccag  
cagagcgtaaagatgatgaaggataagtagagttcatgatattagacgatgtaggattatagttgtgtagttatattgattcagatgaagcagaa  
gatacgggcgaggagttgctatttgggtggttcgattgaggataaccggatggaattggatttgagtagccagtcattggaatgattgaggatgc  
tgcttgggtggtgattaaagtcgtaaggttcggagttatgaagaatgatttacttattaggggagaaaatcttgatgggaggtattgaaggtag  
gatccgcattcgcagaggaaatggattccagatgctataggtgcagcattcatattggtgatagaagaagatgcttctgctgtggttagcaagcg  
gcgtttatatttaccattaggaggagataagctttagttgctttaggagtggtcgaaggattggataaccttcaatttgcgattcagattagaac  
agtaacacagaatggcttctcgtcgcatttaactctcctccgacggcaagtaaggcagccagtccttggcttctcgttaacaggtttgagcga  
ctgctcttgttctgcttagctagtagtaagcagaagaattagatagaacaggtgttctcgaatcgtttacagaagcgtctgggtatgca  
acgtaaggtttcataataaaaacgtataaactgacaacgatgaaaccaagattatcaatagacttcagagggaatacaaaaaaaatcaacaaa  
aaagaaacaaaatcccctgagaaaaagattgaaacacagtgatgcaaaaataaaagcttactcaacatgaatattgaaacgagctaaaa  
acttcgaaattttagctaaaacataaagaaagaatgattaaaccaagaaaacacaactcaaaagaaagaaaaaagaaaaactcaaagttca  
cgaagaggaaccttttaactaacacaaaaaataatcccctcagctaacagcaaaaaagaaggaccacaatcaaaagaactagctctcaa  
aacaataatgagatacagtcataatagaaactaaatgaggaatgagatgaggtatattaggctgttccaggcttcaattgcaaaagcttcca  
attcagctgtaactatgcttacaataataattagtaaatcaggcattagtaaaattataacttatagatagaccgttttcttctgtctatt  
cttttcaataatatttcaaaaaaaagaaaaagataaacaatgttctgttggatggctgacttggtagacgaaagaaaaaaataaaaa  
aaaaaaaaacaggatgtaacacttttcaagtaccatggctattttcaccataaaactgataattatcaacaataaaaaaataagtctaagctta  
tggaagaatcatgtagtccgcttttttgccttccaaataggaagcataaaagtaataatacaggcttttataatgtttacagaaacttata  
cagaagtgtgtaattatagaataaattcatgtattgtcaatttctgaaactcagttgtaccatacttattccataaattggatgaattcacaggaa  
ccaaatcagctcatcctacttaagtagtttataatttaattgctgattggagaagctaaaacctcagtcagagatacagcatttcaaaaat  
ataaacatgaccgagaaaaacatcaacgtctcgtctacacaggtgaagtaataacatacaactgttctattttcgcactttcaattacttccca



tcaacacaataacaatgtgtctcaatgtcgtactactccttaccatctaattttcaactataccatggatacagtggtcagttaaagaccattaagta  
acatattagtagtattaatcataagaatttatcaacgtcattaatgcattagggcaaataaatagtcagctcattaagaggattgtaaccgaaaggaca  
aggtcgatcattgaacgtttgtaagtatattttgtacatcacccggatagtcatttggaaaggtccagcttagcaaatattccagtcctctttgtt  
tcactgtcatttactcgccaaaactcaaatctcatcactagctgctgtagacaaaattcgccatcgggtgagagagctgagtataatactctgct  
atcatgtgcggtatataccacttgcttagtgacacctgccgtgccataagaccagaccgacaaattattatcaggaaaaccgtgggtggatataa  
cttctcgaagttgagggtccatgtagcgacttactgactaccagatccactgtgtgactctcgatccggtagcggcattccgaaatgaat  
cttcttatccatcgtaacctccaccggtgctaataagattgcttggcaaggacaccatgctacagccttaacagccgagtggtgattggtttgtaa  
acttaggaatagacgatctagcatccagattgaaccaaattatcattaccaccagaagtaactgaagaccatccgaacgcatgcccagtcaca  
cacacttactctcatgtcccaataatcgccactttgtgctgagcaatacggacatcatgatggatgaatagcactgagcagctgccactggac  
agaatgtgacgatcccaagccaaaacactaccctcgctgatgaccggccatcgctcgaagctttttgagactcaacgtcatagatctcaacc  
aatccattaccaagtcctacagacaagaatgtaccgttggagaccattcaaccagctacataagtagattcatccgtttctgctaaaccacga  
acatcaccgctgctggcattccaaacgtaaacgtttctctcgagtgcgatagctacatcattcaaattagaccagctctaataagtcaagtaataat  
catcaacgatgccaggcgcatccaagactcgctctggcgtgtagcaaaccttgcgctttgtctgtgaaacaacgggtttttgaggtcgggtatattg  
agcacgcaaatctacaggcttttattcaggtgcatctggtttaaagcaaggatgcgtgtattaaatccaaaccacaagcttcggctactgat  
tcattgactcagccgacaattcatgttttattactaacaatgcgttagctgaattttgtcttgaaggatgaatctgactgtgattcaagca  
acgggttttagcacgaggagaattcactgagctggcaatgaccagctcagatgcaacgacatcaagttttggtgagcctcggacaaaattgaag  
gaagtctttgtggctttttctgctgagcggtaactttaccagaagagcctgctggtgagaggcgaattggactatttgatataaccagag  
gtctctttctgtagggtagaaaatttagaaacataagacaaattgctgctaacgtccatattttataggaataactaatttaagtataacgacaa  
aaatgcttaagaggataaagagagactaaagaaaaagaacgacgaagaataatgttgggtgtaatccaagaatctattgacaaggctcag  
tattttgtcaatgtctctttacttttactttcaagtaccagcactgtgtgtaagaaaggaatataaaaagggaatcaaaacaaagaag  
gagaccagctcagagaacaaaaatggcaattaattgaaagttccagcttctttaccacattcaatagaccagcctaggagaataaa  
atgtaacagagaatttaattctgcaaatcgggattttgagtctgttagtggtttgttacaccaagttccaaccacctcgactgtttataatccaa  
ccgcaaaccttacccttctgtaacctcgcgaccattgtaataaacaagcatgtaaacagtgagcgggtgacagggggatacaatttgcaaaag  
attgaaagaaacgtcagttgctatgattgcagttgagtcttcttttactcattcgtaaacatgcaattttgggcattttaagaacaga  
tcgatgaaatcttttagtgattctgatcgcttaaaaaacctatagtaaacatggacacattcaaaagaaacgacatagcattccttcaatcc  
gctacatagataaaaaagttcattgtttaattcaattctgattttactgtttcatatcgattctttcttcttccagtgaaacagctctgtagtt  
ttgactacattgtaacattatatacactgaggttttctcttatatgaatcaagaaattctggacattattatacttaccaaaattcttctttga  
aagagaagacatttttctttacataattctgcttaggctctgatggctggtgattggactcaccacaaatgtaacttttccatttcacatact  
ctgctaatatggctggtatagcgtgaatatcgatgaaaaaaacccctgagttataatccaatttactataaagccgaggaaatctgcagttat  
gttcgacagtcagttcacattgtatattacttaggcttttgggtgtctccaaaggtcggttgaatattggttaactgtaattgaaatcttttaata  
cctcagattacaatcggtattttctcataagttgaaccattgattataaaccttgcggtggttattcttagatataattcttaattggtctataatt  
ctccgttgtttttgtatataaattactcttggaccgtattataatagacaatgggattctcatctcgatccctcgcttatttcttagtgggtgcctt  
caactgttacggcttctcattgtatgatggtccagaagttatggaagcatcatctcaaaaactcgaaaaacgttcaactgatgtctcaatcaag  
tcattgatacatctgatccatcaaccctattggctccgcaagccatcctttgacccagccgggcttccgaaagtgaaagcctaccgaaacaa  
acaagttctatgataacctttgatcggtcaagaaccttttctctatgctgaccataccgctattggtggcagctgctcattactcattctggtat  
tatgattgctcactgatgaaatcaacgtgtcttgcactgggttagcaccgttcccaatttctattataatccaattggtctttgtctttagcttt  
tggtggctctggattgactaacgaccattgctcccaggtcgacgaaatcgatcagttgtccgctcgctaaattcaactggggttcttctcaatga  
aaatcttttggtcgaaggtttggcctttaccactgctgaatacgaatgccgttccgaaatctcacatctacattctttatgaatgctgtggtat  
cggcttctggatcctcgctactcaaaagtacaaagtcacactgtccgatggtcatatctggctcattatgtgtttggtgatcaccttactttgac  
gccaacggaaccaagttctgttggctcaaaccttcaatggctacattcaaatagcaaagattccctttggcgatacctaaagctgagctattt  
atgaccaacatgcaggcagttatgtaactggtatttctgtttccggtcatgttgatggcgacacaggttactataccttcaacctgaagactccggt  
gatagttctgttacgctttgcaattctgttggcccaaaatgaaatcactgtcctctggtgatctactaccgatatttctttggttctactgttag  
tggtacgcgacagctgttccggcagttcaattactttgtgatactgttccctaaagatatccatttctgcccctgctacctgagggtaaagagg  
ttggttattcaaccgatgactcaatgatcaccactgttctgatcaagagggtgaacgggtgatattggctgctgaaagtaattggactctatgta  
ttatagcggtaaagttctgcaagatgctatgctttgcttacagttaacgatatgtaataataactcagacgagcaatacctgtgtgcaaaaag  
ttagaaagtgccatggctcgtctcgtgataacaagcaaatatcctttggtttatgattctacctggaagggcgtagtcagcaaaagcaggacttt  
ctggctatgcaatggctgattttgaaatacttactacaatgatcaccatttctactatggttactttgtttgacagctgcggttattgctcatattga  
cccaattggttaactgttggtaacaacaagagattcatcaattcgcttattctgtgatgtttctaatcccactagcagatgatccttatttccctgttca



actttgtagatcattcacgtagaataaaattgcttattaacatttccttctctctatatatatataataaaaaagaaatcggagattc  
ataaaaaagagaaaaaaggactaaagttaggctttgataaatactaggccgattataattacaatattatagcgtagggaactccccac  
aagtaacagtaacgaaatagatcggcgtagatctggtagatttgcggaagtgaaaatctgtaacaatgggtaaaacaaaatgtaagattcg  
gaagctgaaatcaatgaataatgaaacccctgttttaacgttcgtaatcaagctttttatgtctcgaattactttctaagctctatattattgac  
atcggtagcttttcaggtggccttgctggaaatcgacgaattgtattagagaaggaaaacaagagaaagattcattggcaactagagttaatgt  
ctagaaagtatcagtaaacgacgtagacgtttcaactacatactgaatcctgtgtcttacgtttctttcatccaagagagcgtatgggtctaca  
ttacttatgctaaaaaagttttttattcttttattcttttcgtttattcatgattttttcatttcttttctgtgcgttcagaatagtagaaacgatacc  
ctacaggtaacagagtataccctgttactttactccactgcatcttcagagggtccaccttcagcaaaatttagtctgttattttggacataatt  
ctttatttttctcatttcattatagacggtttcatccctttgttaagagatgtctttggaagcaaacgtaaagacggctagagactccttcattactc  
ttcaaacactctcagcaaggacgagatgaagcactagacataattgtagaagagcctaatacgaaaaaggacactatactaaaagctaagc  
tgaagacatggagctgcaaagaaacagaatgaagctggaaaattgagctcatctatgttaaagcgtcttgacttactctctgctaaatga  
atcaatggccaagggtctcagacgttaaaaacctcgacgatcctctagccgtgttacttatggctgtcgccttgatgacaactggatctgtatc  
gtgttcttgccttgggtgtctttgggtgattttgaagctcgccagaagtaattatcaacatcacgctctcgccatcaagctgccaatgacg  
tcgtttgaaaggaggtacagagctacaaaagcttttctgtctgtcggaaagttgacgctcggtctctctagaggcaaaagttcctcaagggtc  
agtacaactagttcaaagccgtgaagaagttgctcaacttctcaattgatcgctatatcgatcttctcattcctctggtcagcgataaattagttc  
gctacatcaaagaaaacacaaaatccctgtccttggtcatgcagatggttatgctctatgtacgttcatgatgatccgacaaaagacctcgcg  
ttaaagttgtttcagcgtaaaactgattatcctgtggtgtaatgtgttgaaactctctggttcacgaaaatgcgctcaccaccaattcctt  
taattgccgaaaaattggcccaagcctccgtgggtcttaaatgtgatgaccgctcctttgaggttttagaaagggctccttatgcccttcattgctc  
cagcacgctacggaaaaggattatgatactgaattttggattatacttagctgttaaaacagtttctcattagaagaagcaatggaacatatt  
aatgccatggttcaaaacactgactgcatcttgacctgcaatgaatctgttgcaataaatttatgtctggtattgatgcttcagggtttattg  
gaatgcttctaccgcttgcggtaggcttccgttatggctttgtagctgaggttaggtatcagtacaaaacaaaattcacgcccgtggtcctatggga  
ttagaaggcttaactatataagatcaactcgtgaaaaggacatgttgctccgcctacgggtcggctcctaataagatccctttaagcatg  
agccccttgatgctcatatattctgaggttaccaaattggaagattgagcttcaatgtctctagtttctgtttatgaagttcacttctgttttg  
aaaagttccctcttcttctgttttaataattgttctgcttccatataataaattcaacttctgttctgtctgggtaatttctgataaatgaaaactag  
tcaaacgtcccgtgtaagtataatataacataaacaacaaaaaagaaaaaggaaacatctcgactatttataaaatcttcaataaatcct  
ctgttggaataagtaacaatgatactgtaattctgtcctcaaggtagccgaaaagattactttcaactactataaccattgagaatccatatac  
cctttattcgcatatttctatagccatagatattctattaattttatcgtatatgtaccctttttatctggactgaaggtaaattgattctcaatcct  
gaagatacttgatgatcaacacaatggaaaacaatggatgatctcaatttgagagaaacccctcccttttgcgggaaacgacattagaaaaaa  
cgcaaaaaactaaaaatataatagagcactattacaaggtagcagtggaacatgctgtagaaagaaatcaacggtaagtggaatgctacaatt  
ggagaattcgaatctacgtttgctcaaaaataaaaaaatcaatctattcaacattgaattacgtaaaaggtccggttagctatctcgt  
tagaggccaattctgtctgatccataagaatcgagccttctgcagataattcaataagtgatggaattatcatattcatatacagtagtgaaaa  
ctcttataactatgtttagaagaattgagcttgaacgaaagttaacgacggaacgtggttctgatgaaagaaaaacagacagctaagag  
cgttgggagagagggaaatcacagttttgcgttttcaaggacgaggtctcgtggaagactttgcgactattaaagtcattggaaaagggtgctt  
ttggtgaggtatgttttaattgtccttctgtattactaacaacaaataggtgaggttgtaaaaagcgggatactggaaaaatttatgctatgaag  
tctttgtgaaaactgaaatgtttaaagggtatcaattatctcatgtcaaggcggaacgggatttgcttgataatcagattctccctgggtggtttc  
cctttattttctgttcaagactctctactccttaccctcattatggaattttaccggaggggacttaatgactatgctgattaattatgatacctttt  
cagaagatgtaactcgctttacatggctgaatgtgttttagctattgcagatgttcatcgaatgggatacattcatcgtgatataaccagacaa  
tattctcattgatcgtgacggccatatcaaattatctgattttggtttgacctggattctataaacaggatcaaagtgcttcttatgaaacctcc  
caaaagcggcaatacctaaagagaggacaaaatggtagactctattggctaaccatgtcttcaaaagataaaatggactactggaaaatgaat  
cgccgtgttatggcgtagtagtctgctgactcccattacattgcaccagagatcttttaacgacggttatggtcaggattgtgactggtgga  
gtttgggtaccattatgtttgaatgcttgataggatggcctccgtttgtagtgaaaactcacatgaaacctatgtaaaatcattaattggagaga  
aaccttaaattttccaacgatatacccttagtctgaagccctagacttaattgaattgtcttatgactgattcagaacatagactgggtcgtggt  
ggtgccatcgaaattatgcagcatccctattcagtggaattgattgggatcacctcgtgaaagccccgctcctttattccttcttaagatcgat  
cactgacactcattattcccgtggatgacttgtgtcaggttccgatcagcctgttgcaaccccagaagcaaatgtggatccaaggactctcga  
acaacaaatagtccttctgggataacttataaaaaatlaattacctcactatgaaggagctctttaaagaaataccaagatttgtt  
attctgttatctcattgcatataaggattggaaggacaagactgaaagaaagacttattcttactccacatttgatgaattaatcgacgtttttgct  
attataataacattgtattaaggtatgtactaagaaatagaaactttgtaaaaataagactacattgaagtgaaccggacaatttgaaaac  
taccaactgtgaaacataaaagataatcgatgtgaaaacaaagaacgatataatgcataaaaaatgtaaacgtaactaataacaatattata

accaactcgaaaaacagataatgaaggaaaaaaaaaagaagagataaaaacattgccaaaaaatgggtcgattttcttcaaaaacca  
gacaacttaacaaaattgaagcaaaaatataataaaaaaaaattgtaccaaatctgcacttttttaatagataataaattaaatcat  
cactcgcgagctttaaggactgttcaatttcatcgttttcattggaattggaattgaaaaactcttactctcctgctcgaaccgagagtgtatgaa  
cgcatcgtttccaattccacaaaaatgtcagatctgtcggtttcatcattcggcggtatcattgtaaaattatccaacattaaagcagcaaca  
gtaacaaaaaactgtaagccaccaccagcattttaccgaagtgtgaaagaattgtgatttcgcaaggtaaaatatttcatcgggataatgg  
tactgataaacatattgaaaaaaaaaccatcccaaaagtgaagaataattacaataaaagaataatgtttacatactgcatctcaataaaaat  
gagctaaagttcatcacaacaactgcagcagtaaaaatgagctgccaaaagcaaaacagttattatcgggtgagctgtttacgcatataacg  
catatgtaacgtaaaaactaaaaggcttgataaatgccatagatgaccagcttataaacacgccaattaaagcttcgttgtaattccttt  
ttgatatagtttggaacgcaatgacggctactaacattaaatcctttgtcgaatataccaagaccaataacacataaagacgaaaagagagt  
taaagcatgtaagcccaattcctataaaactttgaccggatataccaacaaaggctgcataatagcttgattaggaagaaaaactgctctt  
tgtaaatgtacctaaaataatttagatagacgtacataatccaccgaccgtgacaaaaagtagtttaattaagaattgaaatcggcgattg  
agaaatcagatgacgagctgttcagacctcaagaccagcgataccaatccaacgtgggcttctggatcatagcaatatcatttgcgccgt  
ctcaatcgtacgctcacagcagaattaacattctcgcgtacgtttttaccatgagcgtttttgcataggactagcttacagcataaacaga  
gtcaactttcacagaggtgtaataaaaagtgtaaaaactcacggctatttcaatactgtcgagagtagcaccatctatgacaaggactaaatg  
tgctacagagttgcttgcattgctttcacacgacaccaattgggtgaattacgaggtttgtgtatcaatctctgggggtgcttaaagaaagtct  
ctgtccgctttatagtttctcgtcctccagattttcatcctatagatcctaaaccagcagctcgagaacctttataactccacaagaatgac  
caatattaattgagtttctttttatctccagttaacacccaaaattttatgccagctctgaatagtgaaatagactcaggaacgcctgtctgg  
agtttatcttctatcgcagtagcacctgaaaattccaagttcctttcaattaattcagcattatcgtctaatagctgttctattagcaagctgctca  
atgcttcatcattcaatgctttccactcttgatattcttctcctcggagaaatcgatgtgcataaataagtgctttaaaccatctgaagcaaatgcat  
taacgtgctgaaagtgtttcaacatcgcagcatcattgtgacttaaaactttcaaacatcgatccctcgtcttctttcttagaacgagatttctt  
gtcggagagctgttctcactgcaaaagagtgcttccaggagtaggacggcgctagtttcaatatactgggtcagctcgtggccgaatcga  
gccatttttctcagcttcatctaaccggaagtacattattgatataatctgcacgtcttctggcacaactgggtcgggatgctgtcaacttg  
gtctagccgtactcactgtttctataatagctttatctattcaatacttttcgagcctttctgctttagtaacagtagacttttcttttgaag  
caccgaaaggcgaagtctttcggttactgtagaatcggcacctttgtaaataagcaaatccgaccattggcattcgtacaattaccgacatacg  
cttcttttactactgaattcgataacattcaggatcttataagttttgtaatgggctgggaacgaggatctaaaggataatgtaaactgatggac  
acagtgctcatatcacgatccacaacaatatacccagttgttgagcggcatgtacgagagctagttcatcaggagaagtgaggatgtaacgata  
aatatttcttttcatcgtaaagatggaagacatgtgtgacacacagccatatttaaagaatattctgactttttcgagaaagtagtatgtggat  
tgtcatgcagctatttgcaattgaatagtagcccttcaatgttttctgacagttcaggaattttatttcatcattatcttcttcttatttgcg  
gaagtaaccttgattttcggccctacatgttgccaagcaaaactcccacggataaattccgaaatagcattacgttctgtgtaagggtcctgt  
tttctgtaaaacacatgagtcacctgaccaagctcctcaaggatagatgaacttcggacttcacagcgcgtattggttcagggtaatacatatc  
aatgtcactctgaactaagaaagtctgacagacacgaataatttcattgatactgacaaagaattggaaccattgtgtgtataaaatgataa  
atgatacaagaatagggacaaaagcaaggcttccatctgataagtagcacaacttggtttcaacttttctgcatataaaatgcaacggtac  
agtaaattgccactgacgactaaagcaaaaatgaaaattacaattttgttagtatcctttgcatggcaggcgccttaactcgaagattacgag  
aagcgttcatcgaatcttcttctcctgtaaaaataaccaacccaacaattccggagtgcttcttaaattgatcctctgtaaatgacatct  
ttattagttataggaatcttcttcttctgaatttaattgcatccttcattaaattcatataagtttcattaggatcttcaactatacattaccaga  
aagacggtaaggtcattgatgtcttgcacaagagcgtaaagtaggttaaccaacttggttttagagatgtctcctcatataagccgctgtc  
tcgacataaacagcgcattgggggtcggactcgataaagcaattatcagcaggaacagactcgtcagaggttagtcttactatcaccaat  
acgcacatctttcaatcacagttagcccaaaagaatgtagcttgagtggtttcaaaaggagtatttttgggatctaaattgtgaaaca  
tctcgcgattgaaacgaacgtaggtgattgtggaggaggaaggtcaggtatttctggaggaggtggagtagtagtacttctagatccagatcc  
tgggaccttctttctcactttctctacgaaaaaagaaggctgtcgtctacaataggaggtgcattatcaactgtcttaggacttgaacttg  
aatccgattttccacagatcttgacgataacgacgataattatcaaaccttcacgtaagatgcaatagagataaaaatcaacaacggtatta  
tagtagtgaagtgcctgtagtgaccatcctgggatcattgcataatcgcaattaataaaagtaacaattagcagctttgaaaattgagcaa  
tgatctgaaaaggaacgaagttatatttgaacgagacgatacaatgtgttcttaatgaagggctccccatcgttcatcaatttgagaaga  
gtcatcatatggatcaacgataatattgttccatctttgatttcaactggcggaagtcctctgaaacaaggatgaaatcttctactgaggtatg  
tcaaggggttggaaaccgagaatttctgcgattttctgcaaaaattctttaggaatattttacggccataaatttctggtgcaatctcaactcat  
tcgaagcatcgcagcgtttcccatatcatcaaggaatttctcaatttctgaaaagagacatgaactcttttcttcttgggggtgacttg  
tcagtttaactgcaggttaaagcggacttcatagaatttctgtgaagtccaacactgactttaaagttacttcttttcccttattctcagtc  
ctgttccggagacgtcagagctggcattgtctttgttttagactcctcctcatcaatgttaacatctcgaattcatcttataatgcttgacggcg

gcgacaagtctggaaccgacatgaacgcttccccgacgttctacgattcgattttacatttccactttcatcgtagcatcaatattcgctaca  
acgtcttgatcggtcgatgattgtcttttagtccagtaaaatcgttatcggtgccattggacttcataagtgacattgtatgaattgaaactcggtgtt  
ggaatgggcaagcaagaaaagtgtctccgaagtctcctccaatgacttttgatctaacgaaaatcgtaggatacactatttaaacataaaca  
aatgtgtttttatcatttaattcttttctactgtctgctgacatttatgattgaccattggaaaaaagaaatgctaaatctcagcttgaatac  
tatgttcgtataaattcgtgcaaatcatataaaaggaagcagttgaaataactaagcacaacaaaatcttctgtgtaagtcgggaagtagcatta  
aacaacatctaaaaagtttctaaatgtgatgattacggtttgtacgaaacaacttatataactagcagcctaaaaccaagagtattagg  
agactttaaagactgtaaatccttgttcttaaaccaaaccaagacatgagccagtcattagtaaggatagtttctgctgcaacaagtttcca  
atggcactagatatttctggtccttaacgcctccataaaagcagccaaaaacccaaaaatctggctataaagacttttgcactgtgacgtag  
gggaattcctccttatctgtttaaagatttctcaacagcactgctttgtctatccttatcactccagacagagctgacagaagcttattcata  
attatacctgacagtaggctacaaaaattcggcgaaaaggaaatctaaacaaaattagtaaacgattaatcgggtagagtaacaggcatagc  
ttttcttatcgagtaggggttacaagatttctgttggcattagcgttcataataacagatgctattaaaatagcggccaactcatgaaggtggca  
ccaaagctgttgcatacaataaaattgtaacaaatcgcggtcaggcgagataactgataaatttttctttttagttggaaggaatgtagcaa  
gttttgataagaactctataacagaggggatagaaagagtggagaagttgcagaatcaaatttaggctttaaattgtcgtaaagcagtaatt  
caacagaaacacatggaactttagactgaacgtcacattttctagagccatcaacaaaggagagcccaagaagtaagttgatgggtcgt  
agataaaacgatcggatctgcaggaatcgataaaaggagctcaatactatttctggagtgtagaaagcaaacgcttgggtgggtttttatc  
ctataccacatccggacagaagcttttcaacaaattttcatctcttaacaattaagcatactatgtatacttatacattattctcaccaca  
gcttccttaattcaggggatgacattcatcgtaaatcatccaggctctagtgtcgtttagtagcggaggatcatagctgtgcataacctcaaag  
atgcttgcgtggtatgtccgtgaagggaaattacatctcgagcttgataaaatcggtgaagaggttagttaatagattgagaccttgagaccaa  
tctccttagatcatcaacaaacctccgctgattaactgctccagagcagcagcattttacgggaagtgaggctggctttctgtgacttctgg  
cttgaggaatcccaacatgctgctctagatggagaccgatcactgaaacaaccagacactagggtccaatcatcctagaagggagcaagc  
cacgagaaatataatagtagttcgttaggaagcgcgtaccatgtacgcctaatacattaggaacggaatcttctggcacaggtgggata  
gtaagtccctttctgtcatgataacacagtaatttaagtaacaaaaggcacgtctgtattgtgactaattcttgagcagtagccgatggcaatg  
tgtcggcaaatcctccacaacgcgataagcggaaacttagcatcattaccaattctatagcagatttataaagaagttccttcaaattgaggaa  
gtgtgggtgaaatggcagtagcaaaagtagacacgcttcaacaaattgactccaggatgtgcatctgctatcttgatagatagatttccatcta  
accattgaattgtggaagactgtttctcctttaaattaagtgaggaaacggagagagaagaacgaaaggactccgactgcaaaaatggaatag  
aatagacacgataggcgtttcagttgaaaagaagaagatcttctggaccatatacagcatcaacataacgtttgaagcacctctctggaagt  
aggaaagctgtgcatagctaaataggagcaacaaaatagcaattttcttctgtccaaaatgttttcaaaaaatcacataatctatctaaag  
aatctcgttgactctgtagagaaaggtgctgctgattttcaaaattgtacgatgactgccatttgggtccattcgatacaaaattgtgtgaatgta  
gcatcgtacggatcaaagcttgaacatgaatattgtatctggataactttttgtttatgtaaagcttcaactttagctgtagcttcaaaggttaag  
ggaatgccattaaaacgaataaaggagtaacattttttcaaggcttcaagaaaagaattaacataagcgtaaaggatttccgatttcca  
tccacagaaattgctgaagcttccgggcttagctttttaaagttctattagaaaataactggcatcaactcccagtttctgttggctatttga  
gatagctacatgtaaattcatgcttatttttattaagaataattcaaagagtgtactttgtgaaaagatgtagttgcaacagttaaaaaacgtt  
tggacttactagtcattttgaaatgctgaatcaagaaatcgacttttaattgacttttaattccttataaagttatgctcctttgaaagctc  
tcagttaatgcatatattgtgcacacttatgtgagaaggttaaaaaggtaatggcggtcatttagtacttgaatggctgttttagcttgaa  
acccactataaatgattttatctgaaacattcagaataataaaaaaagaaaagaattaattatggtatataaaatagcataaaatag  
gaagttagataaaatccgtaaaagttcagactgcttaacacattagttgtttttagttagcagattttgtaccaaggaatataaaaaaaaa  
taaaaaaacgttgtaaattagatacaataaataaaacaactcttataaaattaagtaagctgtatctaggggagtaaacataggatga  
aaaagaagcaatcgctttagtaaatacgaagcaaaaaagaagaacaaaatgcagacatatgtaaagttcttgattatggttcaacgtaagag  
aatagagaagagaagctaatcttagcgaatttcaaaaagaattattagttgtctggcaaaagtaagcgtgaaaatggtagaggagcaatt  
ctagctaaatgagcgaatcctttatacaagcgaaaaatcctctgcacggactgtcttgaggaaacaatcaagaggattttataaagttcc  
ttattttttgattatacagagtcagatcgtatcaaaagactgcatgcagcagcatacaccaaaaccggaaattgaaactagcagttaaagtgtt  
taagagttccctcctcataaggtttagtattcaatattgcgttttagccaaattatagataggaagctgaactgtgaacctgacactgtacggat  
aatagcagcatcagcggcagaaagattccccgaatcccacttcaactcaactcgttgaatccgtcaaaaatgtgcttataccataactgtg  
accaatagggaaagcgggagagtagcactgacattcgggttttaatacaaaaagaaggagaaccaaacagagcaccacaaaaaccagaacca  
gcaccgctaagaacattgatagccatgtattacccttggatcctgaaggaaggcagatttagatacgaacgaatggggtcataaaatccaag  
acgacatccatttagcaagctgatataatgaagcagttccaagctcctgttggagtccttgaattccttcatgcttggcaaccaatttaaaagctt  
gcccagcgtttataaatttttctgattcgtccactttgtcaactggccctgaagttgaaaacgagtttaatgatttcaaaaggattagttagag  
taaccgaccacatgcagcaatgctccagaaacgaacccatcacgggtcctagtcttgggtgtactggaggttttctgcaacattcgcgc

actcgcttacagcggattgtaatTTTTgatccattggtataaacgatctaaacggttatattgcctgtgtaagctggctttcaccaattgggggt  
gttctgaatgctcactaataaaagaaaaatctcattctttcttatctgatttgaattataaacatcctcgtaagacgatatacggcgtaaatt  
ttcaatgactttcgtcgtactaaagtaagtataattttacgtttacatttttaatatctttatacaatataactgaaaataggtacaggta  
taaactgtaggatataataaaaaataaaaatagttgatctgcagaataaatttaagaagaattccatgaatgaaaaactttggtaaaatg  
aatgacattcgtatgtaactttctttatcaaaaataggcggttaaaagttcctgtacttataacatggcaaagtaaatagcttttgcctttcc  
taatattcatggtatcttatgcttataacataaacgagaattttttttgtcaaaatagcaggaacattgatcagtgctttgtgattcattga  
gtttttgagaacctgtttgtcaacccttttcttggcttacctttatttctgttttatgaccattatacatatcaactactaaatctgtgaaaacc  
caccgatgaactttcagcgcattgctgggttaactggtccaatatttaattcaattgccaacataaaaagctggatagctcttgaacaccgat  
ataaaaaacaaaaagaccccttggctttatgaaaaccttactacattaaacgctcattcaaagtcgcttcttgcatttttaggggg  
ttcggctattaaagtatacctttagcgaagcgggtgtgctcaaggatgatgggtgaatcgtttttgccattccaagcacaatacagggaat  
ttgtcaaaagtaactagggtccttactattttttatgctttttgtacaaaaatcaagtgaggatacagtgaaaaaaaactgagattttag  
tgtcttattatccgataggttattccttggccaacgcttcttttcttattttttgtgtttttgcttttagattttgggtgtgaaaactatctgtggt  
tttatgtttttcttactttaacctggtatgagcattagacatggaatcgtctaaagtcactcccaaaaaatgggtcaactacgcgtcgtgct  
atcattcttggctgcatgtagaaaaagaactgaaatgcgatcatggaagacctgttcaaactgtaagaaaaggaacaacatattcgtg  
tatatactgcaacaaggacaacctcaacaataactttgatggaggaaacgaaaccgattctgtgataaatgagcttttgagtaggatttctca  
tcttgagcatatgctcggagaactaaaccccggtccttccaaggtaaaaaatcattatcacctaatgtgtattaacctttgttattagatag  
tgcttcagcaccgttgacccagttaaagaagattctgctgctttgatgagactgaacgaaacataggtactctatcattgagattcaaaaa  
aactacctatgtaattatccttacttattcatttggcctggcattacgaaaaacgaattctctgaacttagacatgacttttctgaagatggaa  
aggaagttacgcaagaatcgtttttgttcgcttctgttgggaacacgctcgaacttttctcctcgaagcacatttcagatcttctcatcgag  
gcttactttctggtgtcattattataaccggtctacataagctacgtttatgaaaggtacaagattttgggaggaacctgctgagagaaa  
gccagcaatgacatcttctttttgctatgtttgctagtgccctactgctacccaatagaaactcacttagttggaatttaggagaagaagaa  
aaatattgtccgttgattatcatttggcatttctgttacgcgttagcatcatccaactttttattgatcctgatctcaatgctttaagagcttaattat  
ctgtcaggtaaaactctattcatttttcttataacttctcagggtcgttttattctgatactaccctgctcctccctcagtggtgggcttaa  
ttacaaaactgcttactttatgggactacatcgagatggatctttgatggattaaatagttttatgctgaaatagacgcaggtttggttctct  
gtattggttttagaccttagagatctgaaatgacaggaatactccacgaatccatgaggacgttatgacacgagtttcttagtctttaccag  
aagaaaactatcaacggatccatcaattttactgctggacgctttgtttgtatatctggtagagcatcacgtgaagctcaaaagtacatcgggat  
gctgttaggcttaaagtctccaaattatagcaaaatgtgaaatggatcagaactgactgattattataaagaataagcaagagctacttcc  
tgaacctacaactgttcatgaaagattattacacctttttagacttacctttcagcggtttctattttgtttcattttcttttctgttaaagaag  
gtgcttcagcttttctacagctgcatccgttctgttgaatgtgcttttagatgctttatcctgtttgatgagctggcagactccggagtttctatg  
tattcatggtcttttggagatcccccttttcatccgtcattgttcttttttagatatttaccattctgaacaaactatatactcggatgataaaag  
agtgtcatgattaaccaaatatttctattttcctaaaataacggatataacacgctttatcaggcatggtcactactaaaaacttcgcaacc  
catgtctgggaaaaataggactaaaatcatctaataatttagcagtctcggacgaaaacatacctgaattggggtttctagatccgtcgaattg  
gatattagctgggtaagtttctcaatagttgaaacttttaactaactttttaaaggatgattgggatgcgattttcaacattgccattttaactt  
tgagctgcacaatactatacatgtgttatacaatagaaagatggtttattattgtttttaggtaaatagtttaacatatacagaaggat  
actttactcacttttcttttaaaaggcgtgaattgttaattctttcaactcagctactttacaaaataaaaatcaattgtctgtcgtaaaact  
agtattctttaaactcaactaaagatcgagtaacctctcattgacctcttggcttttcaaatctttccatttccatgcttttgcattctggtga  
taatgtaccacatacttttgcgtaatgtacttacctatgtttggtaaaaacttaaagcatgaccactatcccattagcaatcaggacattctctg  
ttccaggcaactgtctattaagaattctgaatcgggaagatcggaaatccagcacattttgacattttgcaaaggacggtccgcaaataggaa  
gatacatttgcaaaatgacgaatgttttcttagcgaatctgggattcagatataaagatggagggttggatggaggaatgatggattg  
atcgaatgagatgtgtattgtagacatattcatagccgtactggagaatttaataactggactgtgatccggtggaaaaacgtatgcgaca  
tcaggatcaaatataattggcatttctgtatattgtttgattccttctccttaattggaggtgagcaactggtagctttggctataacacggcga  
tctgtatgaacatacgcattcatataagccaatggccagtaaaatggtatccgttgtatgattgagccatcatcagctctgcagcggccaag  
gtattgggaccagaggaagtattggaaaaacaaatcgcttaaaagaccacgttttccatatacgaactcaactccatatttttagctcggact  
ccatcgttttaagtctcggacgcatttagcataaccagcatgttcaattaagactgctgaggcattaacttttaaggagcatttgataatagaatt  
ggaaatctttgacggtttctcggaggtttgagattaatgaatgcagaatcactagtagtttctcaaatcgttgagaacagcatcaaaact  
gagatctattagggtcacttgaagtatacttaaccggccattcatggttaagaggaagaaccggatcattcgttctccatagatccattgctc  
taatgccaacttcatgtactttatctcgtactctggacgtacgattttgttaagtattgacgtgacatgtagatggtacagcttctgcatc  
aatggcgtatgattctataaaagacatgttgtttgtcaattcgacagcagcagaaggccgaaaacgccacaaccaacgatcaaaaaagttttg

tcataaatgcaaaaaagtgttgttttgagataagacgaggactaacgaccggactagaaaactaactggcaatctgatagagatatccacca  
atagccaggcaactttatccctccacctagcattgtacacgtgttcaaggaggataatggagaaagtgttcatagacgaagaaggatatt  
aatgataacaggggtatgctcaactttattaatatgcaagagttaagctaaatcacggttcaagatgcaatcttggaaacaagcaca  
aaaaggatcagataaaaagagacgaaataagaataaaagagtagaaaaagataagtagtgaaagataatcttagtgcttgagatccctaa  
atgttgtaaatcatccatcgtcgacaactgggaagtcccttaagggttattataaaagaaaacaattaacctattttaatttttctgtctt  
tctgtttgttactatcttctattagctactctccgatctttacctgagcatccagattgcgctagtcgtgcctttatccttaccttcttggtaagtag  
gggctacgtaatgtgaaatgagacagctttaactagttattttagtgacgtttgggtgagcaggttacactgcttataaatgaggaaagattac  
ccgcccgaatcaaccagcgtttgtaacttttatagctatgtaagtcgatcctgttccacctaagtctcccttcggaatgcataaaaaaaaa  
aactcccagaagatccggggatttcgcttatttcagcttaattgagtgacgaagaagccgttccgctaaatctcagcctatattccatca  
atagatgtgtaagaaaaaaaaataataaaaaaaagcttttccctcgaattctgtctattcataaatgtcacctagtttgatctttctttta  
gttcgattccgttcattacacatcttctgttttgcttacaactttgacctgttgattataagaaatgattcattgtactcattcggaaagacattct  
tggctctgttactcgtaatcttacgattacaaacttagcttctattagcctcaggttgaactttggtttccaggaaatactttctcatatagc  
tcccgagattccgctaccgaacatgatgtaactaagattttctttattgtttactacattatcatcgccctttaaattataaatgtctcgaga  
aattcaagaatgcatcaattgtctgaggttaatttattgtttgattcaaaagttggattccttattccctttaccttctttgatattgtgatatttattc  
ccgttaaatcttcatctattcatttattctttctttttttttttttgtttatttatataattatacaggtaaattatttattagcatcatgtcatcga  
ttgcttctatcttcatcgtcctgaattgtttggtttgatcaaccggttgcctacaacagtcctatggaaataggttacttctaataagcaaaatg  
gttctctgtgacaatccgctaccgctcaagaaatcggtaaagtaaccgattgacctggaggataccaagaaggcagtagatgctgctcca  
acgcttcaagcttcaaaaacaccactcatgtgcagcgaagtgaactattgagtcgctgggctagcctgtagaggaaaataaagaagattg  
ataaagatggcacttagaaaaagtaaactgtttcgcacgctgatatggaggtctctacttccattggttacctcaaaggtatgcaggagaa  
gctgttcgtatttatgtgacgtagcgcctctagcttacagatgaacaactttatgtcggtgaaacaacccatcggtgttccggattaattac  
cccatggaattcccttctgctatgattactcgaaggaggagctgattggcgtggttgactttagttgctatgctgcaacacgaactcctt  
acactgcatgctctgcacaactggcactggaagctggttccctgaaggtgttttaattgatcactacttctaattgttagtgaatggcaaa  
gagctgactaccaatcctttgattcgtaaaatctctttcacaggaagaccgatgctggaaaaatcatcatgagccaaagttctagcacagtaaaag  
aagatttctatggaattgggtggaaatgctcctttattgtttcccgactttcctgttgatcaagctgttgaatcactttacaacattaaattcttta  
gtgctggcgaagtttgcgtctgtcctaactgtgtatacgttcacaaggacatctacaagacttcagtaaaaagcttgcagagaaagttaaaagt  
atcaaggtaggcaacggacttgatccttctaccgcttgggtcccttatttctaaggaaggatgtgataaaattacaagcatattgatgattctg  
tctctaagggtgcaaaagtactagcaggtgtaagcgaattaccgataaaggtggatactttttgagccactgttcttacaggaatggaccaga  
atatggctgttgcgaagaaactttggctcattggcttctgttcaaatggacaataccgatcaagttttagagtgaggctaatgacacaga  
ggtcggtttggcaggctatgttttccaagaacctcacaactttagtcctatgttgaaggaactcgaagttggttctgttgggtcaaatattgaat  
tagtagacgaactttcatgctctttgggtgatcaaacagagtggtttggaaagaagcaggtcgtcatggttgaagagttcatggtcatca  
aagaaatcaacctaaagctttaaaggcagaaatgattcttctagcaaacagtttgatgattctatgattttttgtctatcgttatagctattt  
attatagtacactatgattcacggacaaccgttatgaattatgaatatataaagtttccatcaaattcattaacagtagcttctaaggtcatcc  
gatgtaggcagcagttgtttgtttatctcagcgtacttcaacatgcgaaagctaccaaaagggtaacgatgtaacctcaaaggtcaccacca  
aattctacaaaacataccaatcgaaagcagttggctgttttcatcctttaaagtagcaatattgacgagtggttcataatcgaaatgaatgt  
atatcaattgtcaaagatgctatagagttatgatacagttgctgacgaaatcttcatagaaaatgagaagggtgatgctgactgtaattccat  
cctacttttacttacagatattttggagactcggaaagttctatacggctacaaaaacctaacaatcgaggtatgtatttctcatctacgatgtagc  
actttcaattcttagtagtggttattgttaacgaatgaaagattcaatatatctccttcaatgaagccacagctaaaagttacgttctgat  
cgacttgcctcagaatcaggagtggaaccaaaaacgtcgataaaaacgttgcaaaaacttgagggatgatcgggttccagaaaagcttggagc  
cggttgatgttcgtaatatcccggtcgtgagacttattcttttgatgaacgaaaattctgtatataaaggttggcattgttcttagctttttatt  
gatctactaacttgatagagtaaacttagtgcactagctgcaataatgcagtatttcaaatttttcttattctttagcgggtggctcttttatt  
gatattttgatcctaaatggactatttatttattgtatgtcatgatgaatcgcagagttgaagactaacaagctgttttagatatgaataaaa  
agaggaacagattgttacgagggtattgtaccgtttactattacaatgggataagacgagaacggatggtgagcgtcctcgcatttctca  
gtttgtgatatttctcctttcaaagagaaggccatggttctagactttacaataccattgtaaatatattcttagaggatccaaaaattcttgatt  
cgagtgaggactcatctgaggcatttgacgacctcgtgatcgtttgtatttccagcactgaaatccatgaatatttactagtccagagttc  
cgtttgcctctataaaaggaatggttgactcgaaagatcagccactaaactaccaccggtatattgaatgattatagtgaaagttatgttcaacc  
tcttatgtagcagctttctcgtttgagagattgcttaccatgaaatgaaggattatccctgttagaaagaaaagcgttctgtctctgat  
caaggaaagaatcttccagaacctgacgtttgtcctagctagaccgttcggatcgtcttgcaaaaattcaaggagcctacaaaatcaact  
tgatgaatacaaaaagattgcaaaaagcttcaaaaattattgaaagaaggatctcggaaagcgaaaaaactaaatagaaaactcaataata

gtgaaatggtttaaagtgtgaaattactctattcaattgtttcagaatcttccattttaccactttaagtcataagtcataagtcataatagttgatt  
atttcagtagttaccttttattagctagctatcagcttgattctttaaacttttaaaacaaatataacaatttgcttttttagctttcaaaaaa  
ctttctatacatctatgaaatattgaactcttagtaataatcatcatagtttagtccgttcgagtttgattgttcaaaccaactgtaataagacaag  
gaatccttttctctctcttttttttttttttttttttttttttttttttttttttttttttttttttttttttttttttttttttttttt  
ttcccaccgccagaaccagcgtccttccaattccggccaaaaaatatgttgctataatttttttgaataatataaattgaagtaagattttgct  
ttaatttctacaatgagtggaagattcgtgagagctagcaaatatcgtatgccttttgttcaagggtgtaaattaacttattaaggtcacattttg  
gacaaacatgcaagaaagagctttgctatgataatataaagggtcgttataagtagaagtgatacggttactgaacgttgattagatcagtaa  
taatgcatgggattctaatttaataagcgcgaatcctttctatataagcgtcaattggaactcaggagctggcggtgctattgccgtcattccttag  
aaaatcgaggaaaactccccgacaaaccaactattccgtggtcacactgctgctgttttgataaccgattggaatccattccatgatcaagat  
tagcttcaggaggtgatgacccaagggtcgtgactcattaattatgaatatttacttacaatgatagattatgctatggaagttcctgaagact  
acacagttttggagcctacgaagatgtgcatcctgttctcacctaacaggacatagtcggtatgtttagatgaagaaggctattgactaactgt  
taaaaagcaagtaggacatgtacaattcatcctgttccgcgaatgtgctggcttcttcgagcgtgataaaactataaattatgggattgctg  
agaaaggaattgctcatgtatcattccatgaatgaaatcgtcaatcatttcttttaacgctgatggaatttgctgttagcactggctgcgat  
aagaaaattcgagctgggatcctcgtactgataaaccagtttcagtcaccaatgggcatgctggagccaaaaattcgagaagcgtttggctgg  
aagctaaaccgattgccagaccggttttagcaagatgagtgatcgacagctcgtctctgggatcctgtaaatatgctgaaccaattggagg  
ttttactacctggatgctggttcaggattttaaatgcctttttgggatgacggtactaatgtcatttaccctgccgaaaaggatggttaattc  
ttattatgagctggaaaatgatgtttccattatcttctgaattaaatctgttgatccccagcgtggtatagcttctgttccaaaaaggcgtaaa  
cgttgctgaaaacgaggttatgctgcctataaatccgttaacgatacgtatcgaacctattagcttcatgcttctcagcttctgaagcctac  
cagagtgatattatcctcctgcccttctggaaaaccaagcttatcggcagatgaatggttttcaggcaaggatgctctggtgatagaattgata  
tgtcttactctatgaggccaaagggtccagatctaaaaacaacagctgtgaagattcctacacaagagggtccaaaaggatgctgataaaaatcct  
atcgaggtaaagccttgaagaaactagaaccagctggggctactccgtacaagagaaggccgctgaagatattccatgcaacaagaagaa  
gaaaaggagcttctaagaagagaagaagaattgaacaaaaacatgtacagaaggagaaaaaccagaagaagacaaggtttacctg  
agcatgctataaagtcagagaaaaagctcccgaacaggaagaagttcctgttctataaaagctttagaacaaagaagggtgaaattaaag  
aagatgtgaatgataaattgataaacgcgagaaagagttatccatgtctcgtatgccacaatttctccctgaacaagaaggtagtcttagtc  
aaaagttagaagctatcgaaaacgatataatgaggagatgctattcgagactggaattgctcagttagaggagaaaatacaaaaactct  
ctgagactatagataagcaattcctcgttaaggttatcattttcttcttataatgataaaatcttctattaacatatctactactttatata  
tgtgctttgagcttctcctgagtcaccaccacatcacataacacaggaacacatgttccataaatgtggaatgtcttcgggatgagaacgtat  
ggtaccggtggcgctatgtgagtaaagataatgccatagggcctcattagacgaatcacctcaagcattacacattctgacactaatgtaaca  
aacaacgaacttaataagcatgccttctttttcaattgaaatcgtaaaaaagcttctggtgttaaaaaagtgaaatgaaatctgtaaaattac  
ttcctaagctgccgataaaacagaagaagacataaaaaaagtaattcacatttggtgctacgattattgtccaagtcaggttaggaatatt  
gctaaaacaagtgatagtgatgtaatacatccattactgaatcgaagatgactgagaattaaatgcagggtcctcaaatcgctcctcaaggaa  
gtcaacgcaacttctgactactaggttagtagatcaacaaattccaatccttttagagattatataaaaacgtttaaattctctattataagat  
cggggaagctagttatagtgaaagctttaaagtagagaaggatgaaccgatgctttgaaagattatgcctttggaaaggaaaatcagattcgt  
gctcagatattataaagagctaaagattactaaaaggcttagtagtctagaaggttacgttgatcttcaagaagcagttattgtcaagggaacgt  
atccatcaatttgatcaagaatgggacagatacagataggcaaaaggaatcgagaatgagcgtccagatttcttctcattcctcagttatttg  
tatactatgcttaagtcaggtggtactgacttggaaacattggaactgtctgattggtttgaaactggaatataattcctaaaagcagcgaaggct  
cttgctacgggtgaaaggaaattcgaattgaaacacagggacatgattgggggaatatttaataaagagacgaaacgatgaggaccttctg  
atatttgatgaagtgcttctgatgaattcgaagacttaatacttattcgggtgctgaacgaagctttacagccgactcattgaaattacc  
ttaattgattttacattagctcgaatgagacatacaggttcgtcgtctccatatttaacgagtttgatgatcctgaattattcagtgggcgaggtat  
gttttaacattattccaagtaaaagcatgaacgaaactaatccataatttaggtgattatcagtttgatattaccgactgatggcaaggctcact  
aaagggaatggggtgaatactttcgaagacaacattcctggttacattattattgtatcaattattgtataaaaaaaccttctaaacctc  
gtgatcttcgagcaacaaactaaaggaacgcctaacaaaattgttcaagttactagaaccgtacggcgtcctcacaaggatcttgccttta  
cagaattgtcatttccatccgcctcctcttgatgaatggatcaatcagcaatgatgactgaacctacaagttgcttcttctcattgcttga  
acttagattcttttgctattgcttatttaactatcgtttgataaccgtccattatttgaaaactctttttgaaactgtcctttcgaaaacattgaa  
atttttttgttctaattcatgtgtttaaagactttttatctgtttttttttatgataattcattgtaacttaccagtaaaattcattccttgat  
atacacaactcggaaacctatggtggaactcaacatcagttgacgttttgataatcagtcfaatgaatccgtttttggcggaaggcttccagc  
gttaatgtagcactgactttggagttgtctgctgtatgaattaattataaacgttttatagttctacggcttaggaaatgaattatgaatcgt  
tagattttgcttaaaaaggagagaaatctaacttgtaaatattagttgtatataatgcaaccgtattgaaggaacaaaggtaagaaaacaaag



tattcagtttgattattaacgattcgcattcgtagggaatatcaaattcacgagacttaactctagaaaatgagaaaaagaagaaaatgca  
gcaattgattcttaaatcgcccttctgaatgtcaattcatcttcaaacgacagttacttgacagatgtatcttctggctgcacatgctagagcgaatac  
gattgaaaatgcacataatgtgtttatatacgtcgttatcgaccttgatataaattataactaatcaagccctatccttttaaaaaagtaaat  
ataaatacatagatgcttataagcaagccgcaacgcttgcagtgattgattcaatgaacaaagacataaaaaacgaaaaagaattgacaaaa  
ccgacaggcaacatagaaatagaattgtaaccacaacaaaaaaacaaagctatttaaacctttaagccttctagggagatagaatataag  
ctcccttcaaataatcgctaaagctgtttccagtgcttcagtcgtataaaggaggccctgaaggtagtagtaagatgaggaagtaaac  
gctcaaatgctttttgtttataaaaggaacagggactgctcaccaaaagattccagttcttcttcaactcatcttccgtccaactggattgcttg  
gagatggcaggatgagaaaaacaagaatcattcagaatttcaagttgtgcaggagtcattcggaacagcatcatataaaataactttgcag  
tacgaagaaggatgacgagagttgtacgacacgcttgaattaagctatcttctttagataggttccaaccacgtcaaaagatcttggag  
gaccatcatctaaaacattgaaggagagaacgtcctgggggaagcgtcattatatacctctcaataaatcctcacgaggagatagaac  
agaaaagggaataacccttctttaaataaataaaggcgaccatcgaccatagatgaatgatttcttcatataagaagcgggcagttctt  
cgttcatcccttgagcttagcggatttctccttctggcatcgagaacagtagcgttttagcaaggatagtagcgtcctcacgtgatgaccca  
aaggaatagctacattcttcatccaacaagctaagcagtaaatgagtagaccaagattcaaattcaccgttggaagttcgggtcttccaaa  
atgctgaaaaacgcttcaagcaattgctccctggaccagggtcaggaaactcgaaattatgtttatttagcattcgagagctcagaattcga  
ccaagcatcaaagatccatacaccatcaggaatttactcaatgattcgcgcaattcgtctaaattactctcatgggtagatattttcttca  
aattagaaatgaattgcaaggagactccaaggtcctaacgttgactctgggcttgcgctccaaggacttactccatggctttcagaaaat  
catcgagcttgcgttaggaccaggaatcagatgtaggctttagggcgttcaacgtaaatggttctgaacaactctgtttctgattatggac  
actaggcattgtttgtctcaagtccttatttccaaaaacctcctgtatttagatgaatgattcaacaaaagtacatactctgtactacaaa  
aacctaaaagacaccaccaagactgccaatttaacaagaattgaatatacatatttaaacagttgttggtacttctaaaattgccaggatgta  
ttgaataggtaagctggcagagtcaaactaagcgtgacgtaaccataaacaagtaaggaaaagaatcaataaatgatatacaaaagaaa  
aaagtaaaaagaaggaaaaaggagagaaacaaatctacttatttagtatctggcaaaatctaagtaagatggtacaaacgactctagaaag  
taaaaataatgtgtaatacctaagttggtatccaaaattgttaagatgccgtcaaattcgtgcaatccctgtttataaaggttaagctcagtg  
tactttgtacccttctatctgcttagcgttctaaaatgcatggaggctcccaaacatcacttttagtagataactgttatttttaactaaggaatac  
agaatgatagagccgagtagtctgctccagcgaacaccactgtagaagatggtccatgaaggcttctcattttcatggcgtttttgtagg  
aataaatagttgttctgacatcaaacattcagagccgttccaatgcccgaactagactcgttgacataacgtcggacatgagaa  
tataatccattttttgaaggctaggagttatctgggatgaccatagaaacacatcagtagatataattgtgtaggagatgtttatttttagca  
atgtttggttcaagacaccgagggttcttccaagtcagtcatacagatagatgcattggatactttgatgctacagagatgcttagaattccac  
atccagctccaagttccaacactgtaaatttttgtttttggaaaggctcattctggcttctgccaatcatctttcagataaaacaatccctgctc  
ccatattgttttgcgatgctctctccattttgttccataaagcataaaaccaatggctcccactggttatgctctaaatcgccaaacatacttgc  
gtccttatttatgtaatgagaaggagtcactcaaacaggcagtttctatgagattcatgtgaagaaacattaggagtaatcgtctcggaa  
gaatgattaactgaagttgtttaggtagtggaattgtaagggaatagtcgatgcaactcgtagccctccagatgatacattcattat  
aggagtaggttgccttggagacatctacaaccggcctgcagtcgacaatgttggataaaaatatttccaaggtctgtagttagagtgaa  
gaccgcttaatagttcccgttttgcattctttgcatatacaggctgaacctttagagtcgtatgataataatctaccattaagaaatattcat  
agccttattgttcaaagaacaatggaatataataaagatcaagtttcaagtttactcttcttcaatcatagtggttcttagttgagcag  
tagtacgtactgaagaagtagcaacggcagaattctcatttaacccaattcattttcttttttattatacattcaagattttgtcattttgcat  
agattttcatctacacaatgctgcatataggaatttttcttgtgttatatgagaggtacgcttggtaatccaacatcgtcgcgtcacaaga  
atcgttctctgcaattcctattcaaccacatggtaaagtaaatgccaacattctggtgactctatacaagaatgggagtcctacatgga  
cttggatgatgaatgtgctaccttgggagggtgctagaatgacccagaaagcaataggggaaccagaaaaacttgcaaggatgcat  
attattttgatgagaaaaacgaacaccttagtcgacgaaaaattttgtcctgctaaacggagactttgtcaacaggatctccttggaa  
attctaaagattcggagaaccagtttggagaaactaacgggagttataaaaatcatgttgagcggatgctaaattctgtaggatgatctgcg  
aaaaactgtccgagcgttgaattgcatgaaagtcgaaaagagttcaagactgcaagccttcaagcatggttctatgtatttcaattaa  
agtatctaagaaaaagaaaaacatcaaatcctacctttgtctctgaatggataatcatgatacaacagtagactgtttaaagcaattg  
ccttggttcaaaaagagattgaaacttcaactttagataaaactacatcttactacgaattgttttagttgtacatagtagcagcaactcc  
atttgaactagtaattacataaactgcttaagaaagtcctcatctattgtaaatagatagttgagctatagagcttttttataaatagaa  
ttctttctagaaggaaaaacgaagctgataaacgccgaaattatcatttcaattcatcttttctttttgcttataacgtacgaacttcat  
tgtaaaaccatacaatgaggtagcaacctgacttcaaatgtatttttaagaaaacacactaagtggggcaatccaagaattccatgtggggtc  
acaggaactacattcaaccaagggttctgcgtagtagtctttagttgataagtttcatcctaaccacaaactctttgttcaattaataag  
cataaaaagcttttaacacgaaaaacaaagaagaagaaaaacaacagcatgttcagttgcttggacgcaagaagagatcgattacc

gaaaaattgtgattctgggtgatgtaagagcatcgggtcatattgaaccaccgcacgagaaaactgaagatggctaactctcttaggtgctgct  
ggaaaaactagctctttaaattgtgtttacgaagggctacttccctcaagatatgaacctactatgtaagttcgttgtaagaaggaaattccaaag  
gaaacctcattgattcctcccaggtgaattgctttctttgttttaagatcactcttctcggcgagatccagattgtcgtgggtgtgtca  
gcaatcaatcagaaaaccttgcgatgctactcaacctaccattcatgctcttgatccttgcttcaaaaaagatttagattgaaaactatattc  
acgatatattgtggacggaaatagcatagaacttcttatgggatacagctggcaagaagatgatcaattacgctcgttatcactactctga  
cacgcatgctattgattgtttgtgtgactcgcggactcttggaaaatgcatctcaaaaatggttgcggaagtgtctagtaattgtccgtc  
agtaaagctgttttagtctttaaattgtgattgctcgggtcagatgacaccaaccaactccaccagaattataggctacgaagagggtct  
tgacgacgcaaaaaagatcaatgctgttctcctgaatgtagcgcgcaaaactgaacagaggcgtcaacgaggcattcacagaagcagcacg  
ggtagcttggctgctcaaccacgaagtcaaaaagacaatgctgataatttataacactgggtgtattatctgtaagtttgctactggaaggc  
atcttctaatgtaactatataattcgtccctcctttacatactgttttaataactgtatagaatcctttcgttccctttacaggctagaatctt  
agctccccctgttagtgccatatttcccttctgtcatctcaaaaaagtttttataggacattcgactgtgctatccgcttctactctttaa  
tttttcaatatcttatattgacacagatcatggcttttctgcttttggccattctattgcatcttcttctgactgaagtaggcatatagctctgca  
ccaaaccaagctatagatatagcgttgcctcgtgttatcacttccgggttttatgaactcactccttttctacgattcgtgtttattctt  
ttttattgtcgatagggattttaaataaagttgtaatttcttatcatctgtaaaaacatctcattccttctcgataatttaccatttttcc  
aggttctcgataagttgtaaatgcttgaagttcaacaaatgaggaaacttcaaaaatcttagtatagttatataaccactgcatactgtgtg  
taactaaaaattagtttcttctcctattccgattaaagatcccaatcgtcttcatcaacagcagcggactatactgcaatcaaac  
atgtaaatattcagcaagagggttcaaaacgggtgattgcataaagatcatccaatgaaacgtgagtacatacaacaactcttagtttctcttg  
tttgataattgaccagagatcttcttagaagctcgattaactcggattcagaaatcttctgtaggactgtccacttctagccattcgaattaatag  
ttcctcaacggctaagaagaagttagaatctcaagattaagaaaaacaaatagagaaaaagatgcttgactccttgggcacgatcagg  
tttaccagagcaattcgacggagtctgctcttagcagagtgtccaagattgggtaagctgtaaggtcattaataatcaatgcttcattaagtga  
tattaagcataccatattcgacgaagctcatctgagcatcttttgtgattttgatctgtaggagcgttccgggtctaattgcatgttaatac  
agtgcacaagcaagtgcaaaaatgaaaaaagcactgaaaggactaagcctttataaagtatactttagtaacgaatgcatcggcttaga  
aagttgacattcatttagtacttcaaaccttctcactgaaatgtttacttaccgggaaggtgtgttggcccttagttgagcaagacg  
agcttgacggatagcttgaattctcatcattataaagaactaagatacgggtctgaaattcaaaatcttctgatccttggggaacaaatc  
gaaagacgagacgctgaaatccctaccaactgacgctttgaaatctttaaagcaacttaaaataagaaggactaaggaaactacaatgc  
ttctcaaagctcaataaaacagctgttacaagacgcgagaactataaaacgaacaaataacgcttgcaacattgcacattacgttgaat  
gcaaatgctatcgaatcatcactaaatgagaactgaaataggaggctcattggtaagtattaaattaaccttggtaaatctctatagacga  
gattcttctattcgtgatcgtataaagcttcttgggaatcgggttatatttttgaatccatcgtcttaagtgttttaaacgaaatatttagcac  
ttccctttaaagttcgtgaagcttacttatggcataattttcattgtgataatctctcgttaattactttacagagggtcagcataggttattaaga  
atggattcaaaggacagacgatgacacatggaaatctcatttcttctgacagacttatgcaacgttgagttagtaagtaacaattgaaa  
agaataaaagttccgcatgggatattagaattaggtgctgctaaacgcaaaagacaagtgattaggcgatttatcacaacgtaaaagcctag  
tagtctatagcctgatgtgctggttgagtgcactgatccttcagctcactggaaacgaatataatggaatgataatgagaaagtaataaggacg  
aagaagagcattgctcaagaagaatactgtcacaaaactgctggttgaattgaaaaacagcagcatttagacgaacgatgcgctgatg  
aaatccataaaaaagcgaagttagaagaacgaatcgagagttagaagggaagctttgaccaggaaaaaactagacagccctgaaatgaat  
ttgaaggtgtagaagagaactacggcaaacggaggcaaaataccaaagcagagtcagaacgagatcgcgtgcaaaagttagattgaaga  
gttgactagctcttatttgaagaagcgaatcgaatggtcgtgatgtaggaaagaaacctgcttatcagagacgcgcttctcaattccaaaa  
acagctggctgataccgaaacacttataaataatgctcaatcccagctggtggagctaaaatctgcatgcagaatagtcgattcctatgaaca  
gacgattcattctccatcgggccgggtcttctgctcatgactcggcttctgtttagttaggttctctacagctgctttagaagaacctgaa  
tctctcgaatagccctggacatgtaaaatcggcttctttgaaagccctaggacaccaggaatccaattatgcgatccggctgctcgcgg  
cattcagccgggtgcaagatcaaagagctgctactagcttaggtcttataacccttctcatgttcatcgtgtacggagcgttgcgaggataggt  
ctagcagtgcctcctctgctaccagctggtgtcacagattaccgcctcctctgtaacagtgtgacgcctatgaatcctgctttatggacta  
tcagttagtcaaaactatcgaagaatgaattcagcaatccatctttccgaatttatgctttattaacgtattcctcgaatcgggtccaatcaa  
gaactctttaaaccgtacatcttctcctcgtcattgaaaaataccgttgactacctgcttctgactacgcaagtaattgaaaaccgttctt  
cgtcaccgtctcagtaacttctgccaccgcttcacgatctctcgagaattgcttttttaacgatgcgttgaagaggacattgatccgacct  
tgccttagatcacgcagtaggcttctcggctggcacgctcgcgatatactgctctattatggatgcttcttaattattaatcctgtgcttcatc  
gttatcacaggcttctcctcatgttcccttgcggagataatcgggaaagcagcctcgccttttgaattcgtatcgtccagacggtagctccta  
tgctgctgaattattgtgctgactacgtagcgttggatttatgcttttataaccaggttccaaaggcgtatgggattcatgctctgtt  
gagaaaactggacagagtattcataagcgtgaagctatgtttattcacgggcccggatttagcaaaagaactggaggtgattcctttgtcct

ttgctgtattttcaaacgctcccttttgatctaaggcttagtaaacggacattattatatttattgatacttttagagagtgccgtaaatctaact  
cctatgaagttacgcttgacattaacacgagaaaagaaaaagtaaaaaaagaaggggagcgttcaatgatactgtaaatatggacctattta  
tgagctattcttctgttctatttaatttaacaataactaataatagttatcttacagcaataagatcatcatttttttctaatctctcaataaaa  
aaagagttcagcatttgcaagcttaataaacgaaaacgtacaatgtatttgatagtttaattgtattatactgtgattgatcttaggaccgaata  
tccttgcattgctatgggagcaaagaatggatgtcaataaagaagaataaaattaaagtaagccagaatataaaggaaatattgtaaagtttc  
taaacatagaactggacaaggctatccttcataggaagtatcgtctataactcccgaattgggtccactcatctactctactccccctctt  
cacttataaagtattgttgaacaaacatggcattcttggactacgacttatctacacctattttaaagccaatgtatcctttcttttaggaggta  
agtaaagaagcagggacgaagtgaattgggtgggactaacaatttaggtgctgctatttttacggaacatacaacttcgtaatactctct  
tgccggtaagaatattgttaaaaatagaagaaaacgttcagaaatgtgactttaagcagcggagaagaaagaaggatgagaaacctgctctg  
gtcattaatgaatgcaccttctctgtgctctttgtctccgacaatgaagagaaatcatcgttgaattgattaacgataactataagttgaaata  
acaaccaatgtatttctcttcttaccatattcgtatacgcgctgtccataaaggattcctgaatctgtgttctgtgtgaagtgtgaatgg  
tatgtagaagaataatgatttcttatacgaagaaaagaaccgctacaagctatcaaagcacttttgacgagagagtaaaccggaatc  
gataaaaagcttcgctgcatacaaaataccaccaaactttcagctaaacacttccattagactatacacatgtgagcctcatctcctgaag  
aaacaaaagcttctggggaagcttttgttctgcaacgttgggtcatctggtgcataaacaacaaatgtcaacgaccacacaatcaaccaact  
ttattacaataaaccacagcatccgagaagtttctcgagatttagttcatcaagcaaacctttggaacttttggttgtcacaaccatc  
ataccataccataccagtataccctgagtttcatgaagtacaaccagaaacaccttagtaagaagtacaattcagacaataaataatgtctt  
tattccattctacatgcaaaaatttagaaagcttctctagtttactgattgtgatctactttgtaccttttaaggattgtcttgggttaaagg  
ctccatctcgttgcatacaaaagtcatgaaaaaaaagaatctactagactatgcaacctatataagtagataaattgcaaa  
cactactgtattggacctgttttttttcaaacaggattctgcagaaacgatttctactacgacatctgagacaaactttataactgtac  
tttttgcattgtacctatgtaaaataattttctgatgatgaatgtaagtaagtaagtaacttgcagatagcttcttataatgctatg  
cacttccatacagcaaatgcaagccagcgtggaattcggattatgattattttgaattctttagatgagctttactactacgtctacgg  
atgaagaaaacaaagcaagaaaaatgtcagtagttgatataaaaattggaataaataagaattggaaggaaaattgggtcagggtcttt  
gggcaatttacttgggactgaatgtgttaaccggagagcaagttcagtaagcttgagcctttaaagcccggcatcatcaattggaatagag  
taagtgtataaaataaaaagaaattcaaattaatggcttctttttctttttctgcttctcaatagagtaaacatatactcactggtttccc  
tttagatagattggggtcagtgaaatacttttttttggtaagctttcatatagacatgaaatttcaggatggttttataacatatacga  
agatttcagatataatgattcctgaaaggcaacattggaattccatgattcgtggtcggatagtaacaataacgctatggttatggact  
tgttagggccttctagaagactgttttctattgtggaagaaaatttcttaaaaacggttcttattagcagaccagtaattagccgtatcg  
aatatgtgcatcaaaagcttctcctatagagacatcaaacagataatttctcctgaaaaaacacagcaacgttataacgatgattgattcg  
gattggccaagaaatacagagattcaaaaacttacttcatattccctaccgagataataaaaaccttaccgggtacagccagatagcaagatt  
aatacacatataaggattgaacagtcgagcgacgattggaatcttaggataatgtgtgctatattttgtcggggaagcttaccctggcagg  
gcttgcagcggatagcaagaacaaaagatcagaagattcgcgatacaaaaattaatactccttgggaagtattatgtaaaggccttctgaa  
gagttatttctatgtactacagacaacttctttaccgaaaaactgactataattttaagaaggtatttcgaaatctgcttatacga  
aaggatagcagatgattatgttttactgagatgatacaaaaacgctgcccagctgcagccggcctctgccaactgctaataag  
actcctaacacataggaaccttagtccttaccgtctccagcagtgctcctcctcctgctgacattgcacctcaattgacacctagcctgaaga  
attcacctggcgtataccactgatcattgcaaaaacgctcaatcttattcaaccaatgctgctcaatgtacttctcctctcccctctctgtc  
agctcctgccaacctccaaagtaattgattcaacatcatcaaccctctttcaggctaattacactccacacataagaacaccttgaatgatga  
ccatgcttctaattttatacctgccaactgatctcttgaagaaaaaaaagaaaatggattattcttttcatcctttgttctttccataa  
cttcaaatatttttttttttttgcgtaacgaccgccctcctaacttattcgttcttgatctacataaagtagaactggcataaatactttcca  
taggtttatctgaccgatagaaagtttggtaagaatcgccgatgtggcttttctacttttcttttcttttctttgttacgagaacatcctt  
ttttattcatcagcacttgcttggcttgcatttctgtaatttctgcttctgtattaaccaagacactgtagcattttgtgctttaaatttgcgttt  
ttgcttccattccatactttgaaattaatgcatcatctaattggcggcgtatthaagcattcgttttctttcgaacttttcatattgcacgagc  
ctggccagacctatcaataagcgtgtaggattacattctgttgggtatattgaaacctgatggaagataatttcaatcctagtaaaatggt  
ttcaatcataattgaaataaactagttgcttatttaattcactttaaagtaacaggtagacgctttatctctatgtaacatgtatcgaactgtt  
tttctgtaatggattctattttacatgcttctttgtttttgtttttgtttgtatgctttttcagtagatgatagaacattttctcctaacca  
aattagctgacttgcctgttactgacatctgaggtcaactgctccttggcatgctgtagttgtgaataaccaattttcttaggcaagagt  
aacctgattaaaccatatagttttggtaagaaagtgattggaaaaaattcaatataatagatccaatggctgcaaggtatgtggaataaaggt  
gaacaagcttacataaagattggtagaagaaaagatcgcaatggggaagtttgccttgtatgaaacacgatctcggcgcatatggacgat  
ttggaaggcatcaatgaagatcgaattgcaacttaacgggaaaagtacagtctgaaatcgggtgagtagaactgaataaaggaacaacgaa

aattcataatgaatatgaagctaacagaataagttgacgatgaatattggtacagagattactctgcaacgaaactaatggatactatgaatga  
atcatactttacgacaaaaaacgactgaaaggcacaatgggcccattgaataaggtttccaagagtagtggtatttccataggacttgctagt  
tttctttgtatagtgccattggttctgcttggttcgcgatattagggctggtggccgtggatcggtaccgtaaactgattcaatggaaatattggct  
acttttattgaatgaagggctggcccttatacacttgttattctcgatacattattattataaattgaagcatttcgtttctgaagactcag  
ctcccaccaggttgatggatatacttatgagtgattgagcagcatcgtgaacaataattgatgacatcttatttaagactgaaatattctcaa  
ttttattcttctgttttcttctgaagctccaaagactggatcgattttgctgggtcttatatttcttgcactgtctagtgttaatttaaaactagaa  
agcaaggttctgaatatgtaactcattgggctcattttacaatcatttggaaataaataggtcggctttatgaatgaaatgaaatccatctttctgat  
aactagctcagcttaacatcatatacaagcataaatattcgatcacatttgaatatttcttaatagtatcttatattttatgaaaactcctaaca  
ttttcacggtaataaaaacattaccacttagcgtttatgatccttcttctgctactgctttgccttgtagccataactaaccttgaaaggag  
ggtgctttgtcaataactttacgaaaggaagcttttgccttgatttctgattttaaattgaaaatatagcgttttcgctcatgctttatcaataggc  
acattaattattaagatgctagctattcgaatcctgctcttctgctcgcagctcatctttcaattctaggagatctgctaaaagcaaacgaattat  
tattctcgttttgggaagaattgatcaaatcgcgctatgcaatatcatgctgagcttgcacaagaaggatggaaagtcgatttagttgggtac  
caaggtaggtaaatagttgatatagtctttattaagcaaaaggaactacatcatgtttcctaacaacgattgattgcatatttctataaaattat  
tcgtacattcttaacatttctgtgtagacaagaaaggaccaggttcttgcagaatcatccaaatatacaagctatgctattccaactcttctg  
gaagccttactttcgatcgcgcttatcttcttactggttgcgcccgtaaaatacttcccaattattgtgatccttttatcttattaaataaa  
gcaggcatctatttcttgcctcaaaatcctccctcaatccctacattttattgggacacgctctttatctgttacgctgggaccgcttctgcttagc  
tggcataatttggatatacatttctgcctcaaattaggaagagcacccttctgaaagcttttgcgcatatagagcgtgacttgccaaag  
gtgctttcttcatataactgttcttagcatgacgcaagctatttgggaatggggaattcggttaagggttaaataatagtagcgaattcgcatt  
agatttaactaacagtttagcctgtcatgtttgttacgaccgtccaccagctcattttagcctgtacaagatgcaactcgaagctcaaatggca  
tgaattctgaagagtttaacccgaaaaggaagcttttagtacttccacatcttggaccctgatgagaatattatgaccttgggatgctc  
ttaaagtacaaacgaaacacgaaacgcttcttctcgttctgcttactggttaaaggccaggaaaaccgattttgtaaagcactgcaa  
aagaatccttggcaagcttgcattttgttgccttggtttagtccgaagactatcctcgagccatcgatgtgcagattttggagtttcttctac  
caaagttctagcggctgacttacctatgaaagtgtagacttatttggctgtggtgtccccgtggttgcggaatttctgctatttctgagctg  
gttcatgatcaaaaaacggattttgtcaatgattccaacgagctattcaaaaaattgaggtatgtgaagagaactgagcagtaaattttag  
gaaagttactgtagctgaatcatcttctgtttattcaatgtttctaacttataatagttgctttgttctgacgagcatgacttcaatctgtacgac  
aaggtgctttgagaatctaagaatcgttgggatgatgaatggaacaaaagatttctcgtttgttactatagactcctaatagttctccatcta  
ctaatgatacaaaaagcttgcctcaatttactatacaaattttaataagcttcttctgtttatatttctgggtaagttcgggtgacttaaacct  
acatttaccgagttcgcgaagaacttccacaaatcttctgaggtgggtaccatcttgcgaccttaattgccttgcggtacctcaattacccttt  
ccttcttaatcggtactaaggggaatcaagcattgtaaatcaaaattgattaaagattaaagttgttctaaggatgtcggcgagcaagaa  
acattgcaaaagttttcgagcttggaaaacagctcatcagttggttcatgataggtaagatactatagaaaaatgccttattatgtagcttcta  
actttagtaaaagggatacggcgtctctcaagcagaactgatctcacattagaccaattcaaggcaatgcaactgtggcatgggcccgaacttag  
agtaagtatcttctgctcttataagaaaaggactatgtagtatttcttaagaagtgtgctgaattccgataatcctaacacttctgttt  
agtcttactttaaagttttatgcaaacctccggctgattctgacaaaggcaccatttatgttgaatttgcgaaggagccatcggtaggcattaa  
ggaaatgcgactttcgtcctacactgggggatcataatcacaagaccggcatttatactacgctaattctatgacaccaagcgtgcccacaaat  
tatctcagctgttactggacaatttacgattgaaacattccaagagagtgacctgatttgaacatcaccatcatgagctcgtaccgaaacacatt  
ctacttactccgatgagaaaaagagcttttagaacgttataagcttagaactcagttgcctcgtatccaattagctgatcccgtggcaaga  
tatcttggcttgaagcgtggtcaggttgaagattgtgcgaaagagtgaactagtggaagatacaacagttaccgtatatgtgcctaactaaa  
ggattgtttaaagatttctaataatcttatttccctcgtatgtaacgttctggtttaggggcaagaatgcttaaacaggggaattcttagtca  
ctatttctgcttctgattaaaaaaagaaaaagaagaaataagttataaagtaactgactacaattttgcttttttcttaaaaacaaaaag  
aaggtattatcgaattttgaccattgtcagaaagaggttatttctatataatattgaaatttagattaggaggttctgtttatattctctt  
ttgacttcttctttagaggtttaaatttaataaaaggttaaattgggtttataatcttactgtgtaagtcgtaattttcactgtttctagttcgtgat  
catgaagtataaaatgtacacgcatctatgttggagagcatgagtactaaatgatatactgattatagatccaagagagaatttaattggaag  
aattaagacatgactttcataactagcattaagatataggggcattaaagcagctgttatcttattttcatcatcaggaaataaccaaaggg  
cgagtcacacaatttggtaagttagtgcaagtaggtacctacataactatcaatcacatcgttcaagacactttgcatacgggtggtgctta  
aggaaatagccaaactttatcttggcaacatgatatatacttctggcccgtatgacaaacagactcctatagcatatccgccagcccaacata  
aagaagtggttccgtgcatttaccaagtaaatggatcagcagatgaccaatagccaaataagacttctcctcatcaggaagcccaggagg  
cataggaagatggagacgacgagcagccatacgttccctggagcttcaacgtgacggttaggaataccaaaagataagccatcaatgaagc  
ggtggcacctcctaaagaatgaccagttaaccaactgtgcatgggatagttccttactttatagtatataatcgagagaagcggagtagta

ccgattgccgattgcacttcgtcctctaagcacgtttgactacaagtgtaggcttctgtaacagtcgcacacagttgtccatgcccaacttactc  
gcgcacagcagcaagaaaatagcaagttatcattgacacgatccttttgagacgttccccgaccaataccgtatatagaagtacccttcatggca  
ataattatagtagaattatcgttattggaaaatacatggccacggagcccatcttcatcccaaccaatccttctggagggttatattccagtcg  
gaccaatgtcaagccaatcacatcaaatggaatTTTTgatatgacattgaagctcatcttccgagagagtaaactgttgccttatccgtagtatct  
ggtaaaacaatTTTgcgctccgccataatccacatgggattgttcagatgcaaaccgcatggagcttctc gatagtgattcaatgcttcac  
gagactgattttcagagtcattgattggaattcttcatTTTcagccgaaaaacatcattgctattttcataaacatcttcttgtgtatatctaaacg  
atactgttgattatactgttcttaatccatgatgaaatacgtgtcgaattgcacattaacaaaatcgctgaaggcagcagctttgtaccatt  
tgtctgaaatccgaaatgagttacaaactggaaaattatggatatgatagtaatccacagaacaaaagataaatgcggcattgattaccgtttg  
aggtaaagataagaaaaaaaagtaaatacgaattctTTTTTctaaattaaactactctttaaattttaactaatggcacaatagctttg  
ttgtaattcgatacttggcaagagagtggttgttttcggtaccttttagtaaatagggagtagcctctacaactttaagaatcgttatgtaacttt  
tcgtataccattccattatataaaatTTTTTcaaaataaatacagcgcttccctaaagggtatatcaaaacgaaacaacgcttactagagcggag  
ttctactactagtagtagttacttccagattggaaaatacttcaagaatgggaaaaaaaataataaggtaaagtgatgtttacttaccattttat  
taacaggaatagcccacgcaaggaaagcgtgcttaaacgataaaagtgagattgtgctaaagtaagtagtttcatctatacagtcctatattt  
gtcaaaagcatttaagaccagcctttgaattcattgagttagaatTTTTTctaaagaattgactgtattaacgatttggtagtagaagcgaataat  
tgagggatattaccgtaaacaaaacatcttggtagcaaaagcattccgaaaatgagttcaaacattgatagaattcctaaaaaagcctttac  
ctacgacttttgaatctcggttatttgaacatgctttgaaactaaagaagcatttgaacacactatataccccgctccagaatgtcgagttt  
gaagggaacgattccagctcctcaaatatcccttggatccaaaccaactggcttatagcattgacgctcaaaaagatattatcgtaagagt  
ccactttcaagcgcctcaacgcttcttgaagtgaacgaagccggaacatcaatcgtcaggaggctgttagcatgctaccaccgttattt  
ttagactgtctccgcatcatctggttttggatatgtcgctgctcctggatctaaactgcccaattaattgaagcaatctacaaccaagcacatgt  
gaaagacccgctcaggacagtgtaactcagttcttcaagggcttatcatcgtaaatgacgcagatcctaaacgtgctcaaatgctgtaca  
ccaaataaatcgttgaactccccgaatgtattagtagtaaatcatgatgctcaactatgccgaatatattcgtcccttctcctcgtcgaataaac  
tcaacgagaagaaatctgaaatatgaccgcttttggctgatgtaccctgttctggagacggcacatttcgtaaaaatcttctctatggagggga  
ttggactgcaactagtggtctgagcctcatcccctcagttgagaatcctatccgtggcttccagctttgaagggttggtggttatatggtttattct  
acttgttctatgaaccctatcgaaaatgaagcagtagttccgctgctttgaaggctacaggtgaatctatattcttctgtagacatcacggagaagc  
ttccggaactgaagcgcgaatccggtctatttacttgaaggtgatggatgacactctcaggagtacaatactcctgaagagtgtcattccgaaa  
acatcaccttacttcaaatgtggcctttgtcaatggatgaaatgaaggcacaacacattgaacgatggatatattgttttatagtaaccttctgt  
tttaacataatctagtgcacgtatctatcctcaaaatcaaacacgggaggggtctttatcgctatgttgaaaaaggaaagtccttacaggcga  
gtaaagttgatagttaaagagagatgaagcaccggaagctaaacgcaaaaactcgatatagaagtttctgtaccatctcccgtcctcatcct  
actaccaagactggtaataactttttagtgaagaaccatttctatattaagccagatgatgaaagcatttcttctgtttcgtaaagtatcgaaaa  
cattcaacgaactctattcaaccttaagtaatttttagttagatcccaagtttctcgtgaccaatTTTcgtcgtaatcaagcggtagac  
ctacaagatctgtatatttgcagctccttgttcaagaaaataatagaaaataacatcaaccgtgtcaaatTTTgtcagggcggagtcggttttt  
gtcaagcaagatcagcccttactaaaaagtaaccgctgttggaaattaacaaggatgtttgtaatttccgattcatagtgatggtgtaata  
tcatagccatatactaaacgagaaattcttctgcgatgccaatcttggaggactaaagataactaatgaagaatgattatctcgttttagagcagtt  
tccgaaaatgggaaattgaaggccgatccgagaaaatggtttttgggtgtaacatagtcacatgccaagattgaggatggatcatac  
actgatatgacgattctgctgctgtcggcgaagcccgaatagctgtaattaatgcttccagaaaagaaaaacagtaagtttctaatttgc  
tacgtctataataagtttcaacaatatactaggaatctagaattggaattgttggatagattaactatacaggttttgaataaaaataatgttt  
ggttaaaaaaaaaaaaaaaaaaaaaaaaaaaggaaacagtaaatatataactttgtaataaattatggtcagctttacctcggctgtaaa  
ttacgttttcttgccttataaaatagaggtattgtcttgagaagaaaactcattaatcaatggaaggaatcattaaagttgaaagtcagctgag  
catatatttttgttttctcctgtgctccggatcaacgtatgagacacttctgttcttcttatttaatgcatcttactcagatcattgttcaaac  
gagcgttagaatcagtggttgggtccgttacggacctaatttcttggtagatccctttaaactcgcatcagatcattaaagttgtcttggacc  
tgtgcgctgcttggcaatttctataatgctcaaatataaaatcggcgcaggtgtgactgagcatttggtagaatgcaaacggagcatcat  
ctttaaggacggatttctcacttgactgagcgaccttacgtaaatgctcaaacggtttgagttttgatttcttttgcattcggcaaggggata  
tgtcctctgtaaatTTTccggttcggtatattgcatagccatgagattcccaacacgcgaacattcaaccagtggtatgttggattttatctt  
gtttcatgctaaagggtcgtttgtttataagcaacacgcttcttgcagcctaaaaaattatcaacagtagctccgaaagtaccaatgcctt  
tttaggtgtgagctttctacaccttaaacccagaaaggtgaatacttataccgacaaattcatggttaaaaataaggacgataaaatggcttca  
taatacatgctcatcaacaggagtagctttttgaaaaacaaacatcttcaaccaccattcagttatggttaggaacaggaagtaggaattc  
ttcgattggcagatgatgagggacgacaacaaaatggtttagcttcaaggtcagcagatgcatgccctccttctctattcaggcacttttca  
cgattgtattatcatcctcaaatctatgtagaagaagtgaaagttgtcaaatagccgaggttctgtatttctatagttgtagacagttcttc

tcctcaggtgcctggaaaacttcaggtgtaattcatctaaaagggaacatcttgagctgtaaatgaattttctaagcttttgtttcagctcact  
ccagaggatactactttcccttttctgcctcgtttcatacagactggcttagctctgtatcttcgaaatagcttattttgatgatgattaggtcag  
aagataagtttcatcgtatatctttgactgttttctccggagccaattatgtacgcaccacgtccaatgcgttctggaggcatatccat  
ttgaaagtactctggcttaggacagcacccttttaagattcccatagccattgtacacagacaactctaacttccaccgaagagcatattca  
tacttccgaccagcggctactcccagcaattaagtgtgtgacatcgcgagtaaatcaggacaaaatgtacctccgttttcaaaacagtatttcaa  
gttgaatcgctctggctgctctatatttgaagacatacccgacatttaaaaagagctggcaaaagtaacttctgatcagtaaatccgactcta  
agtcttcaccttcgacctatctgtaaagccttgggatccattcttgagagacaatcttcatatctggcttagatttgcagcaaaactaagtagac  
atgtaagcaggaagcacatgggagctatcattatacttgggggtatcaaaatctccagcaattaagtgtgattacatctttgtcaaactca  
gattataagaggcgcaagttttattgcttctgtgaaatctccgtctatttgaagcgttagcttcaacacttcaagcttatctttacagaggcc  
tgtatgtttacttacacgtttattaattcaatattagtagacaacataacgaaacccttgagcggttttctagagctcattctaccgtttcaaacat  
atgagtacagtagatggcaagctgtcgaacttgaataataaacgtcgttgaactcaaatccacttctaataagtaattttttctttataatc  
agagttgaagagtttctttctttttttggtttgcctaatatttaagtataagtcaagggcgtcaaggtccaacaaggaagacgactgaga  
atggaagtaaaagaaaggaaatctatacggtaattttttttttcttttaaaccttctagtagatgaattgagggctactgtcattatagat  
gagagagcatttcaatctgtgaaaattaggtccttaactattaggtcctgatggctcttggggaattgaatcagttccagaaagataaacaat  
agccagctggttataagagccttactatcgtgattacagcaaaataactacagcttctgtgggagcatcaaaagtaaccataaacacagttcatct  
tcgtttatacatttatatttactttacaaccacaataaaaagactttatctataacgagttttgatttcaatttactactgtttatgctttactgtttgt  
gttagcatccgctacttctgcagagggacagtgttgcctacaggttaagtgaacgactacaggttacttcttaataccacgatacagcggc  
aaatcttgaatgggtataaaaggccttaatttctgctggatataatatttctaataaaactggagggatttaattcaagctccggataatcag  
tcgcaatggagcggtaattgtaggaatgtgatttaggggaagaaagatatacctccaggaggaactgttcatgaagaatctactgagcagacgct  
tcaaatgcatctcggagaaatgatgataccaatgattcattagttgattctaaagagcaagagaatgtgtcggacgatgaagatgaacaagga  
caaaaagaagatgccgttcaaggagatcgcaatggcgaaaaaatgaggaagagaacgacgagttgatgaggaagcagaagaagacgaa  
gaagaagaagatgaggaagaattagaagaagaagaagaagaagaagaagccggcggtaggagaaaacgacgacgctcatgaacg  
ccggaatcaattcctgatattgaagcagaggtagatgaagatgaagaggaattagatgacgaggaagatgaattggaagagaagatggttt  
catcgaggaagaagttggcggagctgactatgtgtccgatgatagacgacaccgagaactcgaccgcaaaagacaagagttacaatctgtcgt  
gcagaacgtttggcagaggaatatagagaaaaataggaaggagccaaactgtcattagtgatactagcaatgttctcaagacttcttctcc  
ttctgtcaacgacctaatgtttgggctgttagatgtaaagtaggaaaaagaaagatattgttttaccattatgagaaaaagctatggatcttcag  
tatacagcagcattggaaattatctctgattcaacgtgattcactagtcggttacgtttacgttgaggctaggaacaatcgcatgtattagc  
tgccttaaatggcattttgaacgtttatacgaataacatgattttggtaaccaatacaagaaatgcccggatcttctgaaggttcaaaaacagaccgt  
cgagcttcttctggctgatgtacgtatcaagcgtggtaaatatcggggtgatcttcacaagtgagataacttatgaaaatggcttaaccgct  
cgtgttctgattgttctcgtgtcactactcgaactcactcaagagaagtaaatcaatcactcgtcctcaatctcactgtttaaagaaagtgagg  
cttcaaaaagtaactcaaaaatttatagaaggggaccagaacattgttttaacaatgaggaattgaaagtggttcttgtaaaagat  
tcggatttctcgttgcacagaggtgtaaatccaaccctgacgaagatcaaaattcagcccagtaataagattggatcttagctcactt  
gcattgaggttaagaatgatcatgcagaatttcagtttggatgtcgttgaagattcgttgggaacaagctggcgttgggtgtcgttga  
ctgttcacggaaccgtagtcactattttcgaatgacgggttaagattagatgtccctcccgggttaagaaaacgtttctgcatggtgattat  
gtgaaggtcattgccgggaagtacaaggatgataccggatggttgcgtatctcaaaagatgaggttacattcttgagcgateacatgatgac  
agaactaactgttttctcgtgaccttggtaagctggcagcgtcaggctattaactctgcctacgatttcatgaccttgttcaactagacgtaa  
atacagtcggttgttttctcgggtgaaagagacactatcgtgtcgttgatcaacatggcggagtaaggactgctaaagcatcaaaattaca  
tgcgacactcaaatcgccgtggtgtagctaccgacagaaatggtactgaaatcgtgtaggtgataaggtcaagaagttggaggtgaaaaca  
agaaggaacaatattgcacattatcgtgctgttttcttataatagagagattatggaaaataatggtgtatttggcagaagccgta  
gttgctacagtggtgcaaaaggtgctcgtatttcgacagacttgaccaagatgaatcccgcattaaacaacggctccgtccttactccagttgca  
aacattaaacgtactattggtcgtgacaaagctattggtgctactgtacgtatacgtaaaggacctatgaaaggattgtgggagtgattaaggat  
accacggatgcaaatgctcgtgcgaattacatactggcaataaaatgtagcagttcccaagaaaattgtgtactacgaaagatggaga  
cttaactcattataccgagtttattgaacgcagccgtgattctgctggcagtatcggtaacgtggacgggtccaagcgttccaagttgggacag  
ggtgcacgtacaccagcttatgcaatgggtgcaactcaaaagttggtattctggtagtaagcgcctgcatggagttctggagccaaaacacc  
ggcttggatgctggaggaaaacccagcctggaactctggaataaagactccagcatggaatgctggcagtaaaacccagcctggaactct  
ggaataaaaacccctgcttgaatgctggtgtaagactcctgcttgaattctggtgtaaaaactcccgcctggaatgcccggcacaaccc  
ggcttggatgctggaggaaaacaccatcttgaattctctgcttctaatgtttaggacaaggtccagcttatggggcttttctgaaacg  
acatgggatactgatataaatggttcatggacagcactactcctggtggtgggagcaccacacctggtggaatgaagacgaag

ggaattccctaactacgtgccccatcaccgtaaaaaaaaaatgaaagaaaattcttccgtatactagtcaagaaaaaaaaaacaacaaaa  
atggttatacctaattaatctatgatttttggggctgtttatattggaggataataatttagcaatgattcatgaaatagaaaactttcgaattt  
gttgtatattattgattaggtactgcattgaataaaaatggcgtgtaaaatcatttcttataaataaaagttagtaacagtcttcaacc  
gcgtcctgactttgaccaactgcgatttattttcggcaattcctttggtaaacggctctaaatttgggttgatctgaggacgaaaaacagga  
cgtgctagtttctaggatacagagtgcattgaggattttgttagtggaaagcctcaatatctttgtttccataaatttgcgttgctcatcatctg  
gcatcttcatctgatgattcgtctttctggccactactactttttaccactcaagctaattgaaagaaccttttcttcttttcttttgagcga  
gtgcctgctgcacctgactaagttaaaagcttttccagcaggagatgccagggtgctactgctagcattgtcggatcaaagtcagcagcctcatc  
aataatttagttcgttgagcagctgtacgatcgaatttaacaagacattttcctttgttcagcttcaatagctttctgctcaactgtttgggtca  
atgaatatagaatgtatagaggagttaaaagtttctgaaactgatgtttggaagacatatgcttagattttgtctttgattgaagctgttttaa  
tcgctccctgctttctaagtctgtgagaagttccaactgctgctttactgatcacaggagtcttcagaatgtactataagaagattcgttagaa  
tgatatttatagaaacttaccatggccatgccttcaacatgcataattctaccgcaattgaggcaattgggagcagcttcattgagagga  
gttttacggccttggcaatcgcaagatcttctattcgaattgaagatcttgagaaattccacctgatgaatagctcttcgatgctgctaaacc  
tcaatctactaacctgaggagctgctttggtttagaggcttttttagacccattaggtcagacgtcaaagtcctggacctgtagactttggga  
aaactttgtatttatatagttcatctgtctttttgtctttgtttgtctccatcagaagatgataaacgtgcttgattagttgtttcgtggctg  
atgttcgaggaagccatagtttctcagaataagagcttgccctattgtctctagcttttagaaatgcgtctttttgtgaaatgatgccgaaa  
cctctccggtaaattcactcacaactcaatcgtttctgagattctcctaacagagatatccagtgagtttgcgctcatcagcattttctgctgc  
taatgctgtctgtccacaagcacagcactttctcatcaagtggtaaaagcttaaggacattatctttagtccactgctcaaagctgaagaagg  
cattatgtatatatatatgtacctttaaatttttaataaaatgttataaaaacggcacttaaaaaggacgtaggaatcgaatcaccagtcaa  
aaacgaaactttcaggtgaatgtcctataactctattacaaaaagaacaaagttcaaataattataacactcaatttctatagatcaaaaagct  
aagtttatgcgattgaaaggaagcgtttgtttctgatggtgtgaatgtgtagtaaggattcctcataccactatttgttttcgccaagtcttctt  
tctatgagcaaaacgaattcagcagcgaactaaaaacagcttttgatgacgatataccatttagtggttatggagaaaaaataatttatt  
agttgattctcaaatggtcgtgtgcaattacagccatgatatcgaacaactcttttagtccaagaatggagcaccaaaacccataaaatca  
gttgcgaaatttatcactaacgaagacaactcgaatttatctgttggttccgactgtgtattaaaattagctgacactgcttctggaagagtc  
acctcgaatggattcaagatacagcaagcacggaaccttcccctacagcgtgggtgagtgagggaaggaatcatatattgtctacgggtga  
cgatgatggatgcgttactatttgggatagaagaaaaagtggtggagtccttcattcacacagggatcagattgactatatttctctatgtcca  
ttcgaagatcgtatattggttctaccagtggatggaactttgtcagttctcagatccagaaactcaaacagctgtcatgagtgagaacaa  
gatgatgattaacctgtggagcctttaccgggataataatccaagaagaaatcgcggtaggcacagcttccggcgtggctactttgtcaca  
aagggatggggcgatcatacggaccgattatgccactgtccgttcaaacgactattcggtggaacatgaaccgtgtgacttaagtac  
cctttatattggtggaagtgatggatgccttagacaattgagcatccttcaaatactacgaaagagttatcggacagcacagttctaaagcagg  
gttgacactgctgacgtttccgaaatggcgagtttctgtttcggccagtggttccgaattgatatttgggatacaaaagatggttctgctgagt  
caaacgaaaccgaccagcagtgaggaagatagtgatcgatggactcgatgaatctgaagacaatactgatagcagattcagatgaaccta  
cacagaaatcaaggaacaacaaaagcctgccaaggcagcccaaaaagaaaggttctaaaacagattttttgatggacttaatttatcgt  
gttcgagaaaaactactcttgtgtaataaagaaatactgtttaatgatacggttggaacaggaagaaagcttattgtgtacattatacgtacat  
atatttttatataaataagatatatctagaagtatttttaataatttaacctaccttggtaggtactacaaccacaaataaataatgtcggat  
aaccacaatactattcaataagaatagatcgcacttagcttacttaacaagcaaggttatgctgattagaaaaacaaaaggaacaagcgat  
aaaaggatgctagagagctcaaacctacggtagagaagcagaagatgaatcttggtagaaaggattgtaggattatagctagctttgat  
tgaagcgaactaccatcccagcagattgttgaacaggtcttaccttccaggagtagacatattttacgctccaagatcgttgaaccac  
agcgcagcaagacaagtagcaagtcgctgtgttttgagtgccagccacagcattgttaattacagcttccgtttttcgttcgataag  
tcaaatgtaaaggtgaaatattggagtcgaagtccaaggtgagttgggcatataaacgactagaggaggagcttgttatacatagttttgc  
tttaaggtcgtgttttccgctcgcagccaaagaaggtaggcgtgtgttcaagcccttagaaacaaatgtattttcgtcaggaacataaggaag  
ccacggacatcaatgcttattgccattaacaccagtaactcttctgtatgtttaacaagcagatgagcccgttggccagctattatcgtcagcgg  
tagaatcaacggcaaagatgacatcgacgaacgctgaggatgaagcaatggccaaagaggaatattctgattatctcaccacatcaaaa  
ggtcaacagtcgggtaattcttaaaattattggcaacagtagaattcttagcgggtgagtttggaaaggattagggtagggggcaatatctttg  
atttcagagatatgttgaatgtcttccgcaagatggcctaaggactgtttgaattcaatctcaaaaagcctcgttgaagagtagcaga  
acttccatacaaaagccgcatcgtcgaaccacgaacacattgattgtttgggggaacgccatttttaaatgagtaccgacgtattccatggg  
aataaaagcgttaataaccgttatccagagccaaattcataaggggtaaatcaagatagttgaatttccgggaataatgtgctcatcttctc  
acgactgtcggaaatgataatgggataaggatactcggcgttttgaacctgactgattacgtatgctcgaccaagttataccagggccacctc  
tggggcatcgacgagcttctagctaaagaacgaccccaagatcagtgatagaagtgtaaaccggcatcttgcttagcatcaatttctctcg

aagatgattataatagagacctaactttattgggttcgaatgagggcgaaaaacggaatgtccatgtcccaaacattgtcttcaagtaagtgat  
gttgagaagttgtaaacccgtaggaaaccgactagccaagagccaccagagagaccgaaatatacatggaactttgcataagcccagtaaa  
ctttgagaatggctgctgcaaggcatcgaaaaacccggcaccgttcaacatagcacggaatccaccaccagagaaaagcaatacca  
aggcgaggccatctttcggtaataacatcattgacactgatgtaagaccagcattttgaacaaactcacgagttatgttgactgaatcaa  
tacgctgttcaagtaagattgctcccatcactaatgcccttagagccatcgcgcaagagatcggtggggcacgttacattgtaaggagcatatt  
agaactgtatcatcacgctttgcatccgctggctccacatagcgagtgccagttcaacggcctcggggctcaaatcggggacctgttcatat  
gaagaatcaagagcacgctccaaaaagggtcctggggtaaaagcagtataatggagatacgacaaagactagaatagacgaaaagagcag  
gttcatgttcgaagtaaacagagagccagttatcaccaaaaagaaaattagacaattacgacaaagatagatcctctcaattaattgagat  
atccaagacggaataaaaaaatcttactgcaacacgattgtagcattgtcatatgacaaatagaagctcagagagaaaaatgtagctgggt  
ggatagctgtagctgtgagacaagtggataatagactcatgataccgttcaggaaagaagaagaaaaatacaggacatgatccgtctatgc  
atactgaaattctgacactcgaatcagtaactggaaactagtatcaagatgaagggaaatagagaaataaagataattactgtgcaattgata  
tataatcttggatcgaattccgatttccacaaatcacaatacatatatacatagcaccacaactcatcgtctagcgttcgacaactgtttc  
tcctttgcaagcttccctcgtaacgtttctccattcgggtgatcctgtttacatttctcaatcttttctctgagttctttgcataccttctgtttt  
attttacaatctttaaagattgattataccaaaacaccagtttctataattacacctacaataatgctgaaaacgaaaatcaaacacaa  
aataaaaaaggattagaaatgggtgtaggctcgggttagtttcaatagtggtgaagatttatttctcatgttctcgtattacgtaacctctc  
tcattgaaattgcatgtttacagagatcgttctcgttcggaacctttcaaatccgagttcaattttagtaattgacctcaaatatgattacctc  
tgtgtcaattggatcaactttgttcaattatcttcttcccttcttcatgtctattgcttgagggtttgttttctttgtaaaattactccgt  
agcacatttcaactgtaaaaaattataattcgctattatattactgtaacgaacgcattggtttcttctttagttataaaattgtagaggtttt  
atacaacctttgtttgctgtgattgaagagtaggataaaacaggaatgttgaattcgctgttcaacttctagttatggcctcttcaatct  
gtaaaagaatactacgtctcctcaatcattgattcttctctgctttacaaaaaaaagcctatgaaactcacttcttaccatccgttcttcca  
ttcaaatcatatatacattacattgcttcttatttctttatatttaaaaaaaaacaaacgagtttaacctatctataacataaaactg  
tcacgaactccatacagaattgagcccttagaagaatcaactttatcaacggaagacgagtaaaaacactaaaaaaatgaaagtctg  
caaattgacaaaagctctcgccataccctcgtcctcatatgagataactattaaattttaaaaaagagaatgcttctccgatcaaatgagcga  
ttcacaattcgaacattgaaccataagcttctagtaacgacaaacattactgccgttcaaaataatgcatccattttaaaaagtaatagatac  
agagtctttgaaacacatactttgtgttttacctataattatagataaatctatccaaaaatctaccaagtcgcttacaacgaggagta  
gggtcatagacgagatcatcgttggcagaggtgtcatcatagataccactccagcagtagtcattataacattgctcgcagcagggctagcag  
aatgtttgacgttcaaggtacgttgaacacgacacaagcaacacactgaccaaagtaggttcttattgtccatggtagaagaatcaacat  
tcaaaaacaggtgtttgttggctcctcggtatagtaagtagcgtggaatattgtatagtaattcaaggaacattggaaggtagataa  
tcagaggaggagatcacgagtgacaggacggtcaccagcagtagttagcaccgttacagccaaagaagacggggcggctattgtaatgaa  
ggcttcaaaaagattgagtgctgggaacataagggaacaccttaacgttggcgttgccttctttcagcatcaaaaacagctcataagtctta  
ctagagagttaccgttggccaaacgtattcagagtcagcgtgtgtcaacagcaaatgacgtcgacatcacgaccttttgaacaaaggc  
cacaaggaaggtttctcggttaaggaagtaccacaatgttcaagttatcatcataccaagttgttggcaaggtggtacgagcactagaa  
acaccacggaaggggtgggaatgggtgcaactgttccatgctcgaaaagttattcttcaagaattcttgaataatcagaccattcttgta  
ctggagtcgttaaagttgcgattgagtggtgaaataggtggaagtaaggccatcatgaaaccgaaattgtcgtagttcacgacacaagaacc  
attagcactagagccattatccaagttgtaccaagtagttagggataaatgcatcaataccagatcaaaaagtagcaaacgacgtcagga  
gaagcttcaacataatcgtattgaggttatcaatgttattgagaatagtcctggttgtagcaaaagtgatgatgggatagggaagtctcattc  
tataccaatcttggcagcaatgctagagaaggagacattggcgaaccataagtagtgcacaaaaggagcaccacaaacagcaccagct  
agtcagagagcgagacgttgaagccggcatcttcttggccttaactgttctttagggactgtaaaagttggcattgaagacaatagcactct  
taggtatcatgacgggttagcaatgcccagacactatgttgagatcatcgacagcagagaagttgtaacagccatagaaccaagagtcag  
gcaccaccgtcgtgccaacgatgtaacagaggcttgaagaagaccagagaaaacagtagattgttatggcgagcgtccatagcagcaca  
gcaccacatcaaaaagcatggcacggaaccacctcgggacaaagcaataccaatagaaggtccattttgcccggaaaggttatcggcagcc  
atattaggtagttggcattcttaaggaaatccttcaaggcagtggttgatggatgaacgggtgctcatatactgagactcagcttgaggatg  
ctaccattggaagagactcaatgatgtttgggaagggaatcagcatagaaaggagcgttaactgggtccttctgctcgcctactctccgcttt  
gtgcaaaaagcaacagagggctctcgtttgcggaacgcaaatgattaaggcagaagccaaaaataaggtccaaagactcaatccagaa  
gcaacattgtggatctatggaagattttgactggttggaaccttctgttttaagttcagaagaaattgtaaggtgggagatgactatata  
aaagtgaatcaaggacgacgtcacttggtacgagattaccccgaataaacgacgtaaatcaatcagaggccgggtgtaacgattccgaaaa  
ggtacaagttctctcagtaagagaagtaacagagatgatgaaggatcggagaaggtggaggaaaatacagcaaacctctatttaataa  
taaatccaaaagtagctcggagaatgatgtagcaccgtattaagtagctgtcgtgataagaagaagattggaagattgtaattgaca



gttgactgacttttaggaagtaaacgatgagatgagagaaaacaaaaaagaagagaagagataaaacggaacaaattcagaaaatcctgt  
cttatacaaaaacaagaagcgagcgtactttgtaaataaggattagaaaaacgagtgagagccagttgaggaataagtactacggatgaatg  
tgcgtcaaattacgttaatgctaacaaaactgttgaatagatgtgacggcattttacgaaaatatgctaataaacacttttaaatgcata  
cacaattagtagaagaaatagaatgaatcaattgatccagaagataatattttttatgtatcgtattcaggttctgcgtataagttgggt  
gcttattactgaatgccccacattgatgtttcaagcttctgtatccatactttataatgtggagaaactctcgacactaggagacaagggact  
gtgtccactttttgagacgtccgacccgtcccgtttcttaaatgtaattgggtattccatgtagtggagaaaaagaagccccttgagagcagc  
gttcatgagaccacaagtcaagaaactggaaaaatagtctgaaaattagtataaaaaacttagagtaaaaatgaaaaacaaacaaattcta  
tttgggaagtacatgcataataaaaaatttttttcgtattttatcatgggtgctactctttcactagaatacatcttctttgtttcgtattcc  
cgtatgatggactccattggatgttcttagcggagaaagaaaactttcggtatgtctgctcaagaaaagtgcagttaatcttatcatcgtact  
acaatttgattggcttaggacatgggtttaccacagtgagggtaccctttcccagaaaacatttcgatctactgatcgttgcagaagttagga  
cattattccgtcgtcttatttgacggccaatcatatgccaggagcctttgttatgttcccgtagaagaaggtattatcaatcactacatgaaaag  
cgttatcatattagtaacagcgcgatggaatttcgaaatacttattaaggaactatttccccttattcgggtacgaaaaccttgtaacattct  
tatcatgcaaatcattataccaaagatagcttgagttttcgtattcaagatgaggtatgaagaaaattaggtaaataaatagttcagataaa  
gaagcatgcaaaattggaagaggaaggatgattgtatactgtcatttccctcaggtccactgaaaaggggagcatgaaaagtacatatatat  
atatatatagcaaacctttaattccattctgttcagatttccaaaaatttttctgtttgtttttctttcttttactctcgtcgtgtttaga  
tgagtaatgttcgatgataaggaatcatatcaatttcagttttgttttcttcagctttagtttttgacgatccttgcgtacgaattcaagaa  
acattcaatagcgcagtgattccgagtcactgggatccttccatgttccgcgttttcttcttccatagcgtcagcaaaaatgaaggtgtggg  
ttttgaatcactttttaactgtcgaataatcagttttggaagaattgaatgtcaccagagatattctgcgtaataacagactgcagcttggtaac  
agagtagagcaaatccccatttccgataaaaagccgaaacgtaagactcaccttctgcgtcgaagatcaattccttttctgacatcgttccaac  
caactatgagaagcggggtccatgataaagggtacgatatgaaagttcacttgcgatacaataaagtgattcacatgaaacaattcggtagctt  
tgagtggaatatcattgtcagccaacatccatccacagaggggcatcagttacgcaaaaagccctgacttctcgtgcaatggatcttttcc  
cacagttgtcgggttgaataaaaccggcactgaacacgtcgtacaaccgactccaaatgagaacgttcggagtagttatgtagttcaacaa  
actcggcatctcatagcagctcccacaagagactgtaacattcaaaatataaccggatcgattatatgcttcttggaaaggtaaagtcgccaatca  
aaagcttcatgaccttccaatgacaaatgtccaagacacatcccttgaaaaaagcgttttcaactgtccacaaaggaagcgggagaaacg  
tttgatctgtaataacattgagatcacctgtgtgaaactgtttaacagatcttttcttctcactgttctgtacacctgcagcgcgatcaacaatg  
gctccggcagaagaaccacaaatgatttgggtatgagacctgttcatacaaatcttcaaaacactatagattcattccaaaagttcctccac  
cactcaagattaaagctgtatttctacagtaaaactcagttttgagaactcaaccagcttttctccagtgatagcaccgggtcttctccagaaa  
ctcagacagtaaaagacttctgaataaactcatcaataagtttcttctccagaatgagcataattgtacaattgactgttatccaggtttcca  
aaatctctcgaactgaatgttaataactccaaacatgagccgtacgtctccagcaagccgaagtttcttaattcatgaagcctgcttcaacta  
acttgaattatactcatctgattcgggatatttccgccattcgtatttcttctaccatccaattttccggcggcctgaagccagcttctcgtatgtg  
gaagcatattccattgaaattcaattcatcttagacatttacatttttaacctgatcttctcgtctcgtatagttggtcattatactttcaat  
gagattggtttatagttactttataatgttggagatgagagggcacaatgcataaaatcagtatatacaacaatcacctcagattagggcga  
aataaaaaaaaaaaaaaaaaaacttccaagaaaaataatgtagtaggttggactttaccacagaaactgacaactatgtggcactagtaaca  
aaacagctgcttcaatcgtatgtagctattaccatagattgaaaaggaggcggatacctattattcttttttttttttttttttttcttactc  
catttctttataggaatcgtgccatttaccgtttggtatgatcgtattaattgatgaaattgacggttgcacccatagtaataaaaaacaaa  
agcgtcagcttccccacgaaaaaacaattgcttcttagggattcctggatacttggtacattggtaaagcccaaatcattataggtcaatatt  
ttgaaataagaagggcgaagaaataagaagccctgtgttttttttaaaaagaattgagttataaaaaatactatctggttaacttttatta  
tgcgctcgcagacgaaaaacgaacaattataaagttataaagtaataaaaaaataatagaaaccacgacagatattgtactatgat  
tgtatttatacttttctgcatgagaatgtgacacgaaaaaaatattgggtcattgtaagcgtccatagatacatggaggaatagaaaaactg  
gtgctgaaaaaaacatatcaataaaagaaagaatgagccaatattctagaacagcaagggaaacatagagccttcaagaaaaataaga  
cgctgaacgaaaaattgtttcaattgaataggctttcaggaagctgaaagccgttatggaagcaacttctgttccatgcatcagaaatata  
tggattcccattgctcagtagaatgatttaataacattatgaagactaataagcaacaaccaattggaagaaagctatagatgttggatgca  
gcaacgataaccataaatacttttgcatttggagctgcaaacattatgttgcactactaaagacttgcagatagatatagggattcatggaaa  
agtaataaaggacgcaagatctcaaacatgctaaaaaaggcatcagcagtagaccacaaaagcaaaagatgagaccaagagattttttct  
aaagaattagcatgtcaattcatcgtctgttctgtgaaagcatttctccggtgaacaaaccttgaagccaaaaaagtaacatgaatccagaaa  
taagagtccaatgctcaaaagccaacatgcttccatctcgcgataggcaatacagcagcagagattcatgccaatggctgcgaacat  
aaaaaggcaaggatcttaacatattcgatagacttaagaaaagtacaaactttagagaaagaaggcattatggtttctgctttcaaaaaaa  
aagatgctgtgtttgtaagtattcataatccttctccataaataaacaaggcttttgtttttttgtacacacgtaaacataaacattgtcga

taacacagccatatactttatggttgggaaacgcttgcttatggtatgcatcacgtatcgtaacaagagagtcaatthagaagattgatactctttct  
gcatgactccaaggaagaggactctaattttacttaaaaaccattgactaatgaggccgatgggtttggagattgctttatttttcatt  
ctttttatttatataagagggtacgaagaagaataaaaacagagttgtacctgagtagacattcgaacataactagcctttctcagcaac  
tataataggaagccagtcatttcatattcaatcttttagtatcagatttctcaaaatttttttcttttttaaacctttgtctgctttgcaatttc  
actttttttctttttttctatccttttaattatttcttttctggctatttttgttttcacatcgctcattattcttactgacatttcttttaagc  
gaagtgtctgaaaaaatagtcgtcatcccacaacttatctctgccaacatctaactggtttaaaccgttttagacacgacatttttagatcatgag  
caatgggtccaaaaaattacaatgcgcagttgactgctgagcagcttcaacagcgcttcatcgaccgacgacatacaataatgatgaaaactata  
aaaatgtaaactgctttctgggaaccgcacatctactttctcaagtctacttattctctcagtagactattacgatcaaaggcaatgaacgta  
acgtataatccaagaacaagtggtgcaaccaatctgctgtagtcaaaactcggctctatcttctctctcccctggtgtagtaattatacaccctca  
gtagtgggaaacgatacactctgacttccgcttctgcaaaatctcaaaaactgaaagacagagaaatctactagttatgagcagcatttta  
ctcttctttcttctctatagagcgtcaacgtgccccgtctatctccagtaacgtttcggaaactcggagctcagaacttatgaggaacctaga  
tcaaaataaagacagctcaatcagctcaagaaggcctcatcaaccagtaatgctgtcaacaacacaaggaaatgagcactcaacgaaa  
cgcatccctctccaatcgaacagctattttggtcctctatctccactattaatccggaaaagttggtgtagtagtaccgtcttccaggt  
gatataaaaactcactcagtgatctcctttacaacgttccactaccttaggtcgtcttaccagcgataaccagaagtcagctttaaaa  
agcattctctgactttcgggtgacggacaattgcccagctctatccctaagaacacgtaagtagctacgaggataaggaagatgaaaggatg  
aataactcatcatccgagctctttatgaggatgtttctgaagattttgaagctgccaatcgaatgaataaacacgtccttttatgttccatc  
aacaagcgcatttctgttatcccttcaatggtagctgtagtcttcccgtccgcaagctgattctatgcaattacatctttagaagatgctgc  
aaggaaaaggttgaggaaatgctaaaacaaatggacgatacctaaagttcatggaatgagtcctacatcaaacacagctcgtccgttagagac  
gattctctgatgataaagtattgtttcagaaagcagctttgatcgcgatgaaaacaggggcccgtgctcataacctatttgctaaatataaacc  
aaaagatctagctcaaaggcatcacgtgatttacctatggctattttggtccttataattctttggaaggcaatggcgggtggcgttatgcaat  
gctggtgctctacaggaacaaacagctgaacctatttactctctcagacgcatctcaatgataataatcgcaaggagatcttacac  
tttttagtgatgctcccctatggcagtgagataatacaacgtatgacaataggtttgccaacgatagtgacagtagtctggatggtgagcctgttca  
aaagcccaagaaaaagggaaataagctgaaagccttaaaaaacttttaaaatcagattttagaaaaagccctagtagtactgacaggttctaa  
agtccatcaatgtgtcttttggtatgtctcactatctttttgcttggcgggtctgctatttatcattactgctcggaaatcttttaatactataatt  
attattactgcacagtcattgactgtttttatgtttttacctctgctaacttatataattgactatacgttggatgtaatttatcctttttcttt  
tggtggtattttggtgaataatacacttctataataaactatcaacatagtaaaatcaggaaaaaagaacggtttgataccactacgat  
ggtcacgactggcaaggtcctcaagttttctgataaaaatccgtaattgtaggttcttttctccagttcattatagtttctttgagtaaaaa  
cctgtcgggtatcttggtaataaccaatctgttcttcaaatcatcattaggattgtagcaaccggtcagctcaacgaaggaccttggcca  
tcaactggataaccgttttccatgcttgataaacatccatcagtgaaactcgaactctctgcatcactcataatccaggggagtgagcgggta  
acttttcatcttctgattcaagctcaatgattccacggagcaatgttttcttctctacgtctgatggctcaggtttttaccaggttggatga  
tctgacttaacacgcggtactttatcagatactgacctaaccggtatacattatagcattatgtagtgcgtttaaatcaaggaaatccttatg  
cttgcattggatttcatatacgataaacgagcgaaccagttgaaaaagaatatctagtagtattttggttcatctttataaacgaccagtgctgc  
caattgaaatcattgtcttattatcattatccgaacttctatcgattttcagaatagttttcaggacagctgatatccatgagactaaaggatcg  
taattagaagtttggtgctgggaatccattgccaacgagcagcaaacgacgagactcgtttatttttaaatagaagctttgttctctttaaa  
tctttcacttaattactgaaatgatcaggttgttctgctgcttacaagataaccactgctaataatgctcaacgtaaacatacataaac  
aaacaaaagtaatgtgatcttgaacaatcaggtaaaactttcttcaggttaactaacataacattgaacaaaatgtaacatatcggtgacaa  
tcttttaaatgaaaatgaacgaaaaactaacttttcaattaatgttcaataaaaacgggtaccacttaaaaagttgtctgcataaataaacagc  
gttacatagatgactatcaggactttttatcggttgatcaaagacagctcataaccattcagcattcagaggtattggaggttactcctgaaatcctt  
tcagccgtttttgagtaattgcaatttggaaacctcatgattagggttaaattataataaagaatcaaaaatcaaaacttgctattaattattgctt  
tttagaatcttcatctggctcttctcatcgtctgatcactatccacagcaccagcggcagagaaaacagatacgaactttaacaatcatgcca  
aacatatgtatattaagagctgtaaagaaaaagcaaaaaacaaaagcgtaatatatttggcattaaagataaacctttgaaaagtccac  
attaaatccgctatgatattaggagcagaggttatcacgacttaagaattctgtagtaaggtaatgcttgaatataccagcttaccataaag  
agaccgaataaataatcagagttttaccaaagccgaggtactttatcattttagaccagacagaatatagtctgataaatcgaatgtacaa  
gatggcgttggcaactcgaagaaagttaaagctatagctcaagaaatcaacgaacatgtgacgatgtggtgtgcaaacatttgcaatgggtca  
gcacgactgttccacatgaaggacatatactgctgtaacaaaacaaataggcaaggttaataaaatttaaaagggtagacataataat  
attgaggataatgtcgaaggtgttcttctgtagtcccaatatacactatctgataaatgtaaatcctagcagccaaaagacgaaataataca  
agaagcaatatccttgctcacagaatcgaacaacgacttttcttccgaatacccaagacaggtgaaaggacggaacaatagtcattac  
aatgcttcaatagcagtgaaaattactaaccaataaaaaggaaaaagaaagtcttttaggtcctttaccataaacatctgatgattctttatacga

taaaaacataaaaggttcagcataaggccttgcggcgtaaaagataaagaagatgcataatgaaataagagctaaggaaattcttttgc  
cataaaacaagaacagaggagcttgaccaatcttccgtctttgtaacgaagttctcgggtctcaagagagcaactgaaaaattattg  
ctggcctctgatgagaaatctttgatagactcatgaccaatgggacttggacgaatacgttatttcttctttaaaggctttttactcata  
gtgaagattcgcaaaactatcaagattcaattaatgccaaataaaagtctgaagcgactttaaactcaataaatgtgcttattagcaattcaa  
actatataaattaacaagaaaagagaaagagaatatgaaacgcgaaaagaaggtaaggaagactgggacgtggatatacgaagtaacac  
aaaacaaatgagaaaacaagactagaagcaaaaagatgtaataaatgataaatgaacagaaaaatgtgcaaacctcgttgaaggtcaa  
gctataataaggtttcaagatatcgatccgcaaccaagaaacgtcctcgtaaattccaacaaaaactggtaataggaagcaatgtttggtt  
ccataactgcaaaagtagcaaaagcggtaatcatgtaataatcgactttccaattcacgcaatccactcagctgcaaacgcaaacagctcac  
cgtatgatgaacctccagaataacatcaatttactttcaaagcaatctgtttctcgaagcttctgacgcagatccaagtgaatagttaaac  
gcaaacagagacattcacaagcgttatgagccatttctctacgaaaatgaaatttctcaattacttaccgaatataacttttaattgcaaca  
atcctatagtgtaaaatcgtgctgtgtagcggtagaatgttagcactatcgatgactcgtggctacattcaagagcagaatacgaagaatg  
ttactttcgttcgactcggtagttctcatatgaagtgccttgttacttaataattgctacttaaaattgcaaaataaaactcggcaggaatactt  
gtttatagttgtttcgaatgtttaaatgacaagaatacttcttcatagtaggaagggaaggccaagtaaccaagatcgggtcaaggcaaatc  
actcttcaaattacaacatacccctggaacactactagttcaatagtagcttctatttcagaattgcaattcaactttaccatactacttggtagga  
atagcgttaggtcaattaacactagttactttatcgatactctcaataccctcaataccctcaatataatagaaggagcatttcagaattaagaa  
gtgatttatgaaatgaataaaaaatagatgtaaagtacaccacaagacaatacactgttaataagcgttctcagatacattaaacggcaa  
ttgaacgattttcttaagccactagtaaacctacttttggccttatcttctattttttatatttattcattgttttaattgaaagcagttcgttt  
tgtgtcaaagacaggtttttgcatgttacttacaacgtcaatcggctaaacaagatgctattcctcgtcgtagactaacttggagaatgtttc  
tatatatatTTTTTTTAAAAAGAAAATTCGGTAATTCAGTCATGTGAACAAGGTCAACTCTGAGTTACTCAAGTTGGTGTCTCGAGACATAGTT  
catcacctatttcatcactggccattcagtgatgttcaaactctatatacctaacaaaagtattgaaaagtattcgcctcttaaaattcaatta  
aagcaatacttcatggaattgattgtgattcataagtagcatgtcactcagaatccagatgctgttacaagaaattactactgactggg  
aattttgcacaaaaccagaatggcaggttgaagctccatcttggcgatgtcacaatcattttggattgctgtatcttctcagtgactacagctg  
ctgttattcttggtagattggagctcgggaagatcgctcaatccaacacttgcattcagatgattgtaagcattcaggcaaaagtattcagctctc  
ccctcgtgattctattgattatgaagaaaatactgatgagaatcaaacagaaaaagatggaagattccatgatgacgaagaattaattcgtga  
gcaactggccgtaactatgattcttgggtaagaaggtatggcaaacgttgcataatgctttgttatagttgtaggttgggtgttggtagtt  
gggcaaccgtaattgtggctcgtcaggtgtacaaaagattcgaattattgatttcgaccaagtttctcttagtagtctaatacgtcatgctattgct  
aatcttgatgatgtgggtacacaaagaccgtggctttaaacgcgccattaagcgttggctccatggattgaaatcgaggcttataatacactg  
tataaccctgattccgctgatgaacttcttccggaatccatcatttgcacatgattgacaatattcaacaaaaggtggattattggctta  
ctgctattatcacaagatccaagttattgcttctaccggctcagcttgcacaatccgatcctactcgtatgaacattgccgacattcagctactgccg  
aggatccgctgtctcgcgctacccgtcgtagactaaggctttgggagttatggaaggaatccctgttgccttcttccgaaaaccgatcctcg  
taaagctaactgctacccctatcagaagaggaattgataaaggagatgttgatcaattaagtgttactcgaattccgctctcgtatcctccctg  
ttattggacctatgcttggatcttggcttactcttgcactcatgtttaaacgcacatgcacaaatcccattggatcccatttctactcaggttcg  
tctcgtctttacgaagaagccgtaaagcgtttacatgctgagggcgagaaatgccaatgttctgtttagacaaaacttttaattgcttctgaaatgtc  
tatcttattgaagaagtttactgtggtcgaagtgctttttcccatgaatcccaaaaagtaagtgtggtagatggaacccctcagctcctttga  
gcataccaatctcgtatgatgacaagagatgaagcacgtaagcatgaagctactgttttagctcctcagctcagctcctcctcctcctcctcctc  
gaagtcatcgacgtcgaataagttttgcatcgtttgcgcatctggaagatgctttattaagtaattgagtaacttacttattgttttactatat  
tttttggatcattaggtatgattaggtcattcactaaattggagaaaatgaacagagggaaatcgattcctcctcaatttgggatgtttgattgaa  
tataattatttttttcttcttcaaatccatttgagtacattttggagttttggaaacatgtctatttcttattacattgttacttttctaccta  
caacatagcttttcaaatcaataattttgacgaaacttaacatataatagcatcttctcgttataaatttcttattgtcgagctcaaggcatcgtg  
gttatcaaatgaaggcttttctgaaagaagatctcgttttccgagattacctgcgaacgaacgtcccagagagctcggacttaccgtgcag  
ataataggtctgaagcccttctgcttctagaaaacgttattcttatgatgatgaaggtgacagataaccccaaaaaccacctctggatccggtg  
aggcagccgctgctgccagacgagttgcagagtcattacaatctggtagaccgcatgaaggcaaacgattatcaagaacagaaca  
tcgagcgtctgttcttcttaatgcacctgctccaccgcttctcctaactctcaatcaaatctaaatgatttggtagccacctctatagctgata  
ttactgggaaagtatagaaggggagggttttacaatcaatgttgagattaataatgttaggaatcgttatatactagttaaatcttctacatt  
atccgagattgaggataagagtgaggtccagttgtattcaaaaggccgctattatcctaacaaagctctagcttctgatcgagatcctcctttatac  
cttcatatagtagccagttcaacgacggacttatcaaggccctaggtgaaatagaatctggatacacaagacattggctcctctgtagacgag  
agaaggttctgaagacgtgatgaagtggaccggaaccgcttctcaagggtgatccctcagggtatctcaagtccaatagaatctcaaggaat  
cgcaaacgatggaatgaagaaaaggtttatatcaatttgacacctactaagggtttccatctcgtcaagcagttggtgtcctcaagggtccta

tgtaaacatattcaacaagaaacgcgtactcagtgcaataaaaggacaaggcttctgctttattgaaccgtccactaatcgagaatctgacg  
aaccattacatttgtgataatgagccatgatatgaacaatattcaaaaagcaaaatcactatgcgaggatttaattgcaatgtacatcaacaat  
accagacatggaaaagccagtacaaagaatataatcaaggatcgcaagcatataaacagactaatcgtaaccattactctaatcgctcgccaa  
accagaaacacctagcagtcaggaacccaccaatataatcaatgtctcacctgttccctggagtttagtaccgctactctgcagcaccaattgtcca  
cctggcacctcaatgccagcagccatgtatcctcctggtatgtctctacggttcccatgggtccaccaggatgtctctatgtatatggagctcctgg  
attgtctggtcctccaggacttgatgcgctggcgttgggtgtcccaactatgtctgcacccgggtccgatccatgtcagctttggaggctataatg  
cgtatgtccagctactatcaacaacaattatgtctaaagtctggagccaatccacctcaataaatgaatgtgatcaattggtaattggacaatg  
aacgaacgttcatagaaaaaggcatattttacatgaacctgaaaagtacactcgtttttttgaatttagtgtgatttctatttgccttaaggctga  
gtttattataataattcagctgattttatgtgtggattaaactattgcgttttttctagggaaaaatgtagtaaaaagtaataggactagtaacgac  
aatgataataaattaggatacagaagggaaaggagctcattttacgggtgcattttctggctgtgctgagcagccgcttctactctatctt  
gtctttctagattcattaagattgcaactagtaaaaaacaaaagtaaaaaataaaaaagaaacaagcaaaaaggaattgctatatgaaacatac  
ttaaactggataagcttctgtttagctggagaagcgatattggggctcattcaataaatcttgaattcctagcaaaatctaaaaaaagaatt  
agtaaccactacaagctagaaaaaccgaaagaatatactgtttaatggtaatagctggctccaaccttcttcttcaaaaatagagaga  
caaacagtaccagagggataaacatttggatggacaacaaaggtggagtaaatcgccctagaatcgtgttaggaagctatttggaaatggggagtt  
aaaaaaaaaaaaaaaaaactaaaaccatacacttggaggacgttggatattctagagagaaatagtttagcagggagaaaaacaataaaa  
aaaaacaaggaaaaagtcattcaattatgttctgcaactgaattgctttagctggcaaatgtgatggtaattgcaaggacaggtatta  
agactagcacttgaatatggagactgaagacataccctcagggaaagtcagtgagttataaagaccaccttccaagaagttttggttta  
ccagggattccgaccgtccagttcattaagcaagaccgcatcgggagatttgcaggcttgcgaaaaatccctgtataaggatgttagaattc  
aagtccaaatgagtgaaaagaaaaagttttatcccagataccacttacaatgggtggtctctcctcattgtttgcgttcttctgaagtcgag  
ttttacaagagacgacattctataaagttttagaatataatcaactgaggacgttttatacaacaggagtaagatttgaatgccaatgctttg  
aaagctcgaattttgggtagggtggatggaaaaaatggcaacctgtatagaaaatctctgttggattatgaatccttgaacactac  
gggaaaagcaatacaaaaatagatgttttcaatttaaattaacaataattacatagattattttactagattttttcttctgtgctgtgta  
attctagtttggaaagaaaaagctgccttgcctttagtgaatacaaaagcgcattaccttagtatcgcattcgaccaatagattgatcaagct  
tgatttttctctgtttctgctgcaagaaaagccctggaatgcgtcttgcaggattggttttcatgcttttagactgcaaacgaaactagc  
tttcgggttgatgagcaaaactgaaaatgaaagtaaaaaaaagaagaatcctaaattcgtatagaaaagcaagaaatgctattcttt  
tcagttacccattgttactagtgaaatcgaaaaaagggtacgttagtaaacaaaatccaacatctatcttgaagcagaaagcaataacatat  
taatctaattttgtttctcgtatgtatacaacgaagaaaagaaaagagaaattaagacatgcaacagaatccatcaagcttttctgttag  
gatttccaattgatgctagaaagcgaatacataagggaaacgaaatccgtttccataaatttccaacctacttattttactcttgcgttattttt  
ctacaaaagtattataaatgagcatgccttgcataaaattgatgcccactattcaaaaatcagaaaatgcaagctaaataaataaacatgc  
taacctgtttatcaatgtatttctccaagagtcgtttacataatatttcttagtttctaattcttcacagtagtcagtatgtccgagtggt  
aaggagttagactcgaattcttctcagggcatcaatgggctctcccgcaggttcaaatcctgctgctgacggtaataaatgtgctgagta  
ggagagtggaactccgacgggtcataaccgtaggtcccaggatcgaaacctggcgcgcaagctttttttcgtttcagaccactgcatac  
aacgaagatccatcgtatggacggattcctttatctcccacgtcgttctttttgggttggttttctgtgctgataatcgattgtcattat  
gcaaaggtaaagttcgttaaactagagtgaaattgaaaaccagtcattattgtaccataattctacagcgcgcaccttcaaacggccccagta  
tggtgtaaacctcgtacttccatgatgaattgctacgatcaaacagtgtaataatttaaaccatttccggcaattgattctacaaaac  
aaaacttttcaactcgttatggccacattactgaaactttttcaaaaattctccctcctaactgtttgctgttcttaaccggtaacttcat  
gattgtttcaagccttcttccaacttggcaacggtagagctagttcagttcgttagtaattcaagtcaaaaataaaaaataaaaaagcg  
agaacggacaacaaaatacttgaatggatccactcattttcgtatatttccataaccaggaggaagggtgacgaagcttctcggccttct  
tggcatcagcgacaacaaaagtataagatacttggagcagcgaagcttgaacttaacatcctgttttggcttcttccacacgggcagaagtcg  
catcacctctgtgagcaagctgtaaaaagagcttaatatcagtaacctggcagggctataacagattcattagcttttcatccaagttatccaata  
aaatttacgtaccattttgtcacttgccttggtaagttgctgtgcacagaatcaagttgagttattgtgtgtcctatacattatgtgactcctttt  
ccatcagtcacaacttggcatttctaggctggaatatgcaaattcggtgtttttcggttaaaaatcttattttatcatagaaaagttaat  
gtgctgtaactgattttgctcacttggatcgttactcaaatgcacattcattctgatagacttaggatgttatacaattgcaaaaatttcat  
agaatccatttctgttgaagaattaaaataaaaactacttgaagttacataaactactcgaaccaaaaaacgggaatcgttttcgat  
gaattctcgttgatttaaatagattgattatgtacaaaacgtaagttatcgaatattaaacaacaacaaaagaacaaaaaaataaaaa  
gaattagaataaaaagaaaaagtgaaaaagaaatgagtcgatattaggtccttctgtattatgattcatgtacggtcccgatccggtcccct  
agtcatcattgagcttttgaataaataattacaccaggtcacaggcaaatccttggataggtttcaaatgtcttaatacataatagtggaatc  
ctataccaataataatagcaatattgcataatgtgactatttccacgatgtcaaatcgcctggatagagcttcttggcacatgcaaacgat

aaaaaggactcctataatatagctgaaaatagacagaaaaacaggtttcaataagaaaatgtttctacggcgctcgatataacacattgt  
aagtaacggtaagaatccgctgcaggctaaaccaataaagaaaaagattttaaaggaacggaacctgtaatcgtaaaccactttttccagggc  
atatatattcctatacatccaagtgctccggtaatggctataaaagcacacgaaataaggtatgacatttaaagcatggtattcaaccgagata  
atagaagcagcaatgagcgcggaaataccacataatccatgcatgccgcacgctgcatatgctcatactggacaaactggaaaatgtatgcc  
aggtaaccgaacacgctaagcacttcattgctgatactaaaagaaaatgcggacgattcgattcgaaaacgaagacgaaatccaagacgtag  
atgatggataaaagtatgatataactgtgaaaaatccaatgaatgcgattaaatgggtccagatattgaacgtttcattatggaaggcaaggacg  
gagcgaatgcatcgcgcttactggaataaaaccgataacctcgtaaaatgaaggggtgtttttccactccaaaggaattcatctagctcaag  
aagccgtcttcaccagcagggatagctctcgaagttttcttggtatctcaaatattccaactgtcgttcgactttcaactggtcgatc  
ttctaaatcagacagcaaagtctccaggaaattaaagcttagtactttcgaagggaaatgaatcataagcagcaaggcgtcgtgatactttc  
ctcaatcatccgaagaaagtacataacctggttttccctaaaatgggtctaccaataaatgaattccgtaaccttactaaaattcataggtgta  
tttggttcttctattttgaagtcctacttctcaattcgtttcattcgatccccaggcagtgagaaaatagataaaattataaacaacaatct  
tccgggatcgcctttttatttcaactctgatgaagaatgctgacgacctgaacctttccttaactctctgcctttctgattcacacaatt  
gcggttgacctctcgacaacgatcaatttgattcactctcaccgttctctctgtttttggctgtcaattttacgtctgtacttttcaaag  
gatgcaattctgggattctcgtcgcgcttgaattgggtctgcgtttggtttggggcaactaaaaacacatccgtgggaaactactatgtccatg  
aaactgttctgttgaccttattatcttatgcttaattatctgatataatgataagaggaacacttaccgctaatgtcagcactttaccat  
atagaaagataattaccaaatgggatcacttgtttatacaagttaaacaacaaagaaggaacacaaaacgcaattgagggtttcat  
ggggaagattaatcgataaagatatttaaacctacattcagctcttattttcttttcttatcctaaatataattcatggcaaaaaggaggaa  
ttaaataattatctgagacgactttttacataatcaaaatacctaaacttaaacatcataaaaatcaacaaacgagaatagacttaggagaaat  
agcattaatgatttcatacaaacgaataaaaagtgtattcccgggtccttatcagcctgttttaggtttttatcaattcctgggtcgtcttcaggcc  
gctttgaattagtttccattccagaaatcgaagttccctgttttccattgaatgttgacgagaaaggctggtttctgaagagatcgctttgtcc  
agatgattttgtgatcgaatgaatcactagggcgtacccaattttccattcggctgactttggctttttccacaggctgtacaactgacctatg  
aacgggaacagattttgatgatctactacggatgactttcgtatagatggactatccaatcgggggttgaatttctgaattaggagcagaac  
aactccgtctgcagctgcagcagcagcagcgaatgaatttctgaagaagaggttccatttagattcaagccatcgcttttgaaggataactt  
gggacggcagatttcttctcgtttataggctgaggaatactgtcataggatacgtattgtttcgttgaattgtttctgtagggctttgcaatt  
ctggtttgggttcgctcggactcctcaaaggattattagcaggagatccagtatcattaccgctaggtgagcaatcatgcatctctacaat  
atattatctaactcctcatcagaatacatttctagatctcgttttctccctggtttaacagtagatggatgaaagccttctcattttgatgactg  
gtctgttgaagcctgtttgagcattttcttctgataaattcctcctggaaccagattccgacttacggaataaatcgccgctatcaactgat  
actgtaaaacatcctatttagctgactaactttgctttttcatttcacatcacatacagctggagggtttcattttccaatttctcgtagataaac  
ttgtcatacatgcagtttccaagactgtttccgaagttcgaagggcacgttttaaggcatcgggtgggtcccttttttgactaacaatgagcatta  
atagaaaacactctcgaccattaagctttgtgattcttgatacctttcaaagtctgaccttctcctgcaattatctattgatccataacaa  
tgtcctaaattttagcctttcttctccaagcaactagatatttaacggttacggatgaacgctacctcatgatatgctccatctttaatagttac  
tcgaaccagcagcttattcctaaactactcgaccgttttctgtttctgcaaaaaatcaatattatacttcttagaggatgacctcatt  
aaatccaaaaattttagcagctcaattgcctccaagattcgatagctcactgaaaatccacctggaccagatctccgcaaacatactc  
tggtcccaattttctagtgagtgatgcctgtaagtattggtactcatccgctgaatattggatctcaaatccatttcttttcttctattgtatgtt  
gtttttcatgaaaggtcatgtttctttacactttaagactcctaaatgcagttcaattggtaaaacttcttgtaggtttggtgtagtttagactaa  
caccaaaactactgaagcagtttgatagttccaagttatatgtatataatattatgtattatacattcagtagtcaaaagtttctgtaaagatca  
taataaacttattcaaaagtattcactataaaaatatttttagttagctataagtttccatccttgagtctaatttaagttgctattgttagtatt  
ttctcttaataaaaactaaaagctgcaatataattggaaaaaatgagaaaactcattcctcgtcgttctcgtccgctctctgcaaggatttaagat  
atgtgaaacgtaggtacgaacgaccgattgtatataaaatagattacttggaaacaattcgttctgtttatgagtttccaagcttggttctcaa  
ctaatttttattcaactactatacttctgtaatgttattgtttatgtatcaaagaaaaacatgctattaatattagtgaccataaaggataaat  
gaggataaaaactatcggatgactgttgaagccaatgcatttatagagaaggaattcataaaacgatcagttaaattgttgaaaccaaaaaccatcc  
cgaataaacaacaaactgttgaagagagtggtgggttattaccttacattaattttgagcatgaagcccatacaaaaacacaaacaggt  
gaagaatagaagacaagattagcaacaccttttatattagatggccaccctgtataaagctcaggatggatctcctcaagctttttattttga  
aaaaacgtcaaacagagattggccacgttcaaagttattgtcaacaataacacaaagcatccagctagacatcatcgataccaacagcttgtga  
gtcgcagagtttaggtcatgggtgaaagcccaagccataccaaggaaatacgttctcctccaagcaaaaaagaggttagattcgacgatgg  
ttggttgaattacctcgcgattaggaataacccccacgtaactgattaggaactcatatgctggcattggtatccagtttccatctacagttata  
aaaaagtaggaggtatcaccatttgggtgaagagaagattcaattcctcaattaaagaaggtgtacaaaaactcaacgtaaggcttttgta  
tacataaccgttctgtaggacctatccatgaacaggatcagagctttcacgccattcaagcaggctgagaattaattgttaaataagccctttta

ttaatgttccaactgactttgaatcattttagcctcatctgagataggcacatcgctccagggtaagctgctttgtttttcatgcaataatccgca  
aagagttcacgagctctttgtaagactttggactgccccaaagagaaagtatttcacctgtcgactgacggagccatgacgagaaggatcaa  
attcacaaaagctggactacgcgaatccccatcgaccatgaggaaactcatcccactgatccgtccttgaaatataactttctaaacgagctc  
tccaaaatagtagcgtacatcttattgtctgcttccgtcaggaaaaatctgtacggtttgtcgtcagttgattttctgattttctgtcag  
tctttacttctcatctagcaatccaagtcgctcaatgatcattttcacggctttttccaattcatagttagaaatgaagacgagtaataaccgtt  
tcgattaatgttcgacaaaactgtatcattaagtcggtgccggttcacgtacatcatcattatctttgactggcaaaaagggtatccataaaat  
gttgtggaattttactccactccatttggctcgtcgaatgaatgaatcccaagcttggatgggcatgatgcctgggaaaatgggaaccgttatgcc  
cattttccgactttcttaaccattcaacgaaattatcggcataaaaacatttgcgttacaataaaagatgaccagcatctacttttcttttaa  
atgctttaaacttctctctaaatcgtcatctggtgaatacccttcaggataaccagcgacaccaatgagatttctcctcaatctttttatata  
acgaacaaaatctgatgcatagcgaaagccaccctccacttgggtccattcagtttcttttgggtggatcccctcttagtgccaaaatattacga  
caaccagctcgtgaagctttctcaacgctgttcaatcttctccgacatattgtacatgtgaggtgcatacaagatcaagttgaaattccttt  
tgcgcaacatttacaatcacaggagtcaaatctgaagtaactcccaccggcaccacaggtcacatcaatgaacattggatggccccatttttcatg  
cgatctatagactgtacaagtttggatacctgtgcttgttttggagaaaaaactcatagctccatgtaattctgtcttccagttcggatgtga  
agcttgcacttattttcattcttaccaccaatctgaaggaccttgcctgagtagatagttggcttggtaagttatggaattccaatctcctata  
aacgctgcaggagacggctacttagatgtggactataacgttggattcgttttaagtaactgccaacggttattaacttattaagaagctta  
tacggaagtttcagcgtactgtaacaatgtcgatttagtttttggagagcgcagaaatgtaataatagagaaatgcttgcagtgaaataa  
aaacaaaaaatagcacgaatatgaatgagcaaaagctgacaggtaaatagttcagttctattattaagtaacaaatgcttctatattataaag  
aataaaatgaaaatttcaacaatcattccaaagaccattatacagtaacagacatcggcatataccaaaaatcaacaaaaaaagctcacc  
ggcgttatagatgcaagcattaaggattgggggaagagctgaggttcttgcgcaaaaggctgttaacaaactcaaaaagcgtaaacattta  
ttcccaaaaacaggatgtattctgaagcccaattaggaagttcttcagcaaatcttaccacttttctgctgaaaagcggctttgatctcag  
ctaccaaaagctgctctgattcggcttcaaacacgatgtcttccgcaaaaacgattgccaattcgtccatcaaaactcagacaaaagatag  
caatgtcaacactagcatcctccaagggaagatctgagatcagaagctacaataaactattcgcgaaacgaggtcaaaactttgaacctgt  
atatacttggatgcttcatatgtttcggcaatttagcttccacatccaagatctaccacactgacgggtcgtcgttcttctgtctatcttctca  
aaaagcgaataaaaaactcaacgggattttccggcagcttctgatctgatgtcgaatccggcgtgtaaacatgcaacatgctgggctatctt  
ggaaaagtttcacagcctcctcgttctgtagtatacaatcttcaatccaacgaaatttagccccgctaatcttccctttcttctctgaag  
cgcgtcaaggaccttcttctgactgttttttccacctgtaacaagagatgggtgcttttttcatcaccagctgttcttcttcttcttctg  
ttttgcttttcttagacggttctgacctttgggatccttcttaccggcacaggtttgtctttcaggttattcctcctttcttcttcttctg  
gcttctgcttttggatggagcacttccaaatccagtttacttgaacatactttatgggttagatttctgaagtttgccaaaaatgagtttgg  
tgaagagtagacgggcttggcttctcatgctgaatcaggcaaggcgtcgaactgtgtcttctattcgttgattacatatctaagagattctat  
ttgtaacttttcttctgaaaataaattcattacttggatggtactactacagaaatgtaaaaacgatactttagaaaaaaataacgagg  
aattcatttacatataaaaaagttgaattttctaataattgaaatcataaataaagaaaaatccaaggtgtgcatacgtctatctggct  
gttctatcagtcataattaagccattataaaaggaaagaagccgcaacatcaatatctcattagcagcttcaaagcctgagcagcttcaacg  
gatcaaaagccatgccagtaagttgagcaatcttcgactcaactgtgggatctcctgatgtgtaacgataggactagaggaagttgaagctg  
ccggaacgcttgagatgggtgcagatcacctttgtacctaaccgggatccaacagaggcagctgaggcagaagcgactgaaggatcagcctc  
aatgccgagctccctgggaagcagcagaaggtccaacagatgcttgcatttttggaaattcagatttccctaagaaaggaacctcctgacatggat  
tcgaagaacatttttccaagtcgatgcatgcttggatctgctgaacatgtctaaaccaagaagcatatacaacgtcacgacctcaattacag  
aaaacgacaaggaaggaataagtcccaatctcaaggagcactgtgtacggagccaaaattttgcctgcccacaccttgcgacacct  
gaaaatctcgtatccaacaatcagtcacccacatcgtgaagcacaatcagcagacaaaatgggtggctgagctcctgagctacgaaaagcct  
tactttatgaccattaattcaacattgacgaagagcatgtatacttgccaaaaaccttgggtgattttcagtgccgttctgcatattttctgcaat  
atgtgattgacgaatttcttcaattcgtcgttgcacttctacatcaacaattcatcgtcctagaatgtttctgttagtattacaagcaagatta  
tgttatggcaaccgtacagaaaccgtcggcatggaaaaatggagtaggagcagaagcagatgatctgggcatgaaaaggagttgtgaaaaat  
aatgtttccaagtagatgcaaatcagatcagatcttcaagacttctgtagttgtggaattcacttctgacgatttaagagatttgggtcgtg  
ataaaaatgcttgacgaatttctcaacagataattgattctttctataaaaaatagtttacttaacttttttgggtagtggaagaggtggca  
gaagactgggatgctgcaacggtgcaggcttataatcgttgcacatgtgaaccgacatcaacaaaggaatccaagtaagggaggtaaa  
aagagataagaatccatttttggtagacatacaattcaagatacagatccaagtcgtcgtggcagcatgtattccatacatcaacattgaaagcc  
ataatttaggactctgtgtcctttcagaggttacaagaggccataagaatagggaagctgaataaatgcttcagaagtgaataaagcattc  
tgccatggagcatgattttcagatttggatcatcatatttgcbaataaaagcgtcgaacagcagaaagagaggatatttcttgcacccac  
tcgaagactggaagatctcaaaagattgcagcaaaaaagtggtcagaaaaataaccaggtaaaagatatacctaagtttcttctgtagcgggtg

agtttcaaagccagacgcaatccaagaaacaacaattggatcgcttgcaaagttttccattttttacttttgcctttaagaataac  
atcttagccatttctctatgcttttagcaaaacaagattgccagacaagcaactccaactatagggcttgagttacattggattggaggttcttagcca  
actgtttttcaaaaaaatttctgaccgtaaacgaattcctcgggattcatgaaacgaatcctctgtggttatgtttgctaactctgtcagcgc  
tggatggatagtgtctaaaaacacaacgtttacttttggaacgaacattgcaagaaaattcgatttctatcaaacgaattgaacctattcc  
ctactactatcctttgtgatatgtaactttatggaatcgtaaaccaacaatccagtgataattttcacatcaggtgaagggttcaaaagatcag  
atccatcaaattgaattaccattttgacttctttacatcaatcgctgaaatggattttcgatagaacgatcaaattgtttgtttatgaatggaa  
atttggaaaaggtaaagtcttaataatgatgaacaacgattatgatgagcctgaaaagttgcttatctagaactatttggcaactagaaaagcctt  
cgtagtgtttgttactgacactctttaaaacctttgctgaagaccaaggcgtatcagcaagcttataaaaaacaactaactctgaaaaggatct  
tgaacagtaattcaacctcaaacctttataattgtctgtttctgtttacgagcattcaagttgagatattcacagacacccaaaagggttgcag  
tttcaaatgggtccaaaactcatcctttaaaagggttatttttaactatctcagaatagagctcggtagcaccatcaattgaagggtgacactt  
gtatacataaagaatacctctgtgtacctttgaaacaaaactaacaagatactgctacaatcagaaaaaattgaatgaattctgaaaa  
aattcaaaccttagtgactctctgaaactccattgtaatccaatactagctacaggaaattgacttggaaattctcattactgactttctttcgtt  
ctgggaaaaatcaatgatctttatattagttctttctccatcttaatttctaaactaataatgagcataaaaaaggccgtctggtaaaat  
cattataggagccgtacaggttcaaatatcgccgtattgtggatcctgacaagcctcctatcattttctgtgtaaaccgttatgtcaatattcct  
atatggatgaaatattcatgtttctcaaaccxaaagatattgcaatcaggattgggaatgggaccggccatcactactctccaggttatactt  
actgtctatttttgaacctgtttaggggtcatttgggtgctctctcctctctaaatttcttgggggtcgtttgttcccgagtttgtttgac  
atcaacaacaattgagcggtaaggcttccagtctccacttgtttcttcttcttgcctcactatggttactttctactttattatactgatattgt  
agtactgtaatagttctgctggcttatgattttgactaagaaacggccatctcagttctgcttttgccttctcagttgttcttcgacaacaa  
acattctttgggttgggtatataatggctacttaattacgaacgactgtcgtttatgatcctgtattgtctgaagcgacctttgtggatttttttg  
acgattactcattattggaagtgttttaagaaattaggaaaaataggaaaaaactacttccatttgtttcgtcttggcttttcaatgggttttt  
agtatggaatggaggtattgttttaggggacaaatcaaatcataatcggttatccatcttcccagatgaattactttactacattttttctttt  
tctttcttctgttttctccattgttcaaagtgcacgtggaaacctaaatacattctgttatattctcgcgcacaactctgacttcttccctt  
attgctattaattgtaaaatataatagtaagtctttttatgaattatctaaacaaactagaatcatacaccggtttctcctcgctgataatcgac  
attatgtttctacatatttaacgaattcgagatattgggtggttaaaattccttgggtcacctatatacgcattttgttacattttctcatcaaaaa  
tatttctcaatcgtatctgtctggattttactattataactctagctactttgctcactttagtcgggctcccttggctgaatttcgttacttctt  
ccctttctattttggcgaatgaaagctccgtggaaatcaaaaaatgcttggtagcagaattttctttcatatgtctcttaactatcagcgtgta  
tatatttatatcgccattttctggcattctgagccaggaaagttacaacgattatgtggtaaattacgacagtcttttttttttcttcttaca  
gacgaaaccttccattagatgggttgaatgaaatgagatggatttaggaaatgctcagtatatcgcttaaacgatattatagaaaacacagtag  
gaaatgctactacaagaacaaatttgcgaaaaactgaatacatcaaggaaaaaggattgagatacaccttaacaattattagtagatgac  
accaattaaaccgttacttctactgtataatgttataatctatcttaataatgaaactgattccgaagaagattgaatacaaaagggtgaaa  
gctcttctccctttcataatcttaactcaataaggacttatcattacaatatcttactttactaaaaataaaaaataaaaaagggttatcttaa  
ggcgggttaaacatttctttctgtttaaaaatgctcatctactacttagcaaacactcaccagtcgggttttcttctcgcatacaaggaaa  
ttccgctcatttgtttttatatttctgtctttttgttccatttagcaaaagttgctcatttggaaattagtgaaaataatatttctgggaaag  
attgttgcgcaaacgattagaagtaaaggcctttgatttcaaaagcttcatccttaccattagtttatttttcaatcttttagaagaacaggaa  
tatgttgaacacgccccagaattcatcatcctttcattctacacaatgccaatggactaatattttgttggtaacaagcataatacattctctg  
tctctctcggcgacactttgggtatagctctttaaagttagtgcgaagcaaaaactcaacctataccagctgttaaaaggcttgggtttcacg  
ttactgaaagatggactgcatatgctcacttgcgctgttacaatccgactggaacattctgtttacagccatgtacgtggtctatttta  
ggcgcttattccattaatagcagccttttgatgtatcaaaaatgttggcgcttttggagttggctccttttaatgcgaagtgcggatgcgtgtg  
gaatgatcttgggacgaaaattggatgctaaagttagagcgcagcaaatctagaccgttagccagtaggttgggttagtctgtgagggcgtat  
cagtttaggagttcagttactgcaagtcttggatactttacagctcaatccttatacaatcaaattgggagttgcatcttcttctctgtttgcat  
atatctgcatgaagcgaataacttattatccaagaatcgactaggcttaacatttgatacgggtgctgtcatgggatggccgctttagtaggc  
gaagctgtatgaattggtcagttgttctccctttatthaagcgcagtatcctggattgtcttatacgatactattatgctcatcaagacaacgg  
gacgatgtgaaagcaatgtttatctatggctctcgtatggtgacaataccaaccagctcctgactggcctgactcttttcagctgagcatgct  
tacaactgctgggatttgaacagctcaaggactttattctatactattggtgttgcaggagctcttaccgcatattttccatgatataaaagtaa  
atttggactctcaaaagattgctttagctgttttaaaaagaactctaaacaggcttctagtaactgctgctattgcttggactggctcgctaaa  
gcttatacctcctgaaagcactgtaatttcatgaagaattgttcatgttagcaggttacgagtacataaatgtaaggcataataaatccttagc  
aagtaaagcctgaaactgaatactttaggattatcctttataacattttgtaacaagaatagaaaactttataaaattgcaagtaattttca  
gtacgctttggctaattaattgctaattcaattactcttgaatthaatttccgcaacatccaacataaattcatatthaatccaaaacctacataag

cagattaataatacAAAAaccttttaagttgaatgatcaactgccattcatctctgtgaacctcattgcggaaggcaggatccttcaacgcatt  
aatactttcacgagtgatgtgtaatacaaggtatcactttccgtaacatgacgaccgaacaagatctgtgaaccaccaccagcttctagtttcat  
ggcaacaccaccaccagcttggcccttctaacccttcaacgggttgggttcatttcaagactgactacacgtccaattcaattttgaggtt  
cctctccgggaacattttgacagacacaataggcgtacctttacgcaaacaccatcgacaacatcaacaccgagaatgataggatcccgtta  
ttgaaagcagcaatggcttcaaaacacaagggaaaaccgcaacatcagagtttctctcgttctgttccataatttgtttgatgggcagtga  
aagcatgaaaagatgatagattacgttagcggagaaaacctttatacctaactgatcagctaaggcttcggcatcatgatccaccttaacatcg  
aagcaagaagcaaggcatattccttggcttttctaacatgggtgacatttcatcacatccttttgtaaacaggtccaatggtgacagaagcta  
cgggaatttctattgtttcaaaaattcaagcaaacctcctcaagaaccaaagtagaagcctgaaccgaaacaccaactcccgaagtgtctata  
cttccaataaatcttcaagatctgcataagttcatcagctaattcttctcatcatcttcagggccaacaacagtagaaacgagagccagcgaca  
gccttctcagaggtcattggcacaacctttacccattgcagctctaatttcttctatgatgaacatagccgattcacacgcatcttctcataggt  
tgtggcgttaacagagcagcaacagttgtaataataggccaccataccacagataacaatccgatcaccttctcgaacacaccgttcgaaa  
gaataacgtcgtatagtagcaccagaccttcaacaactttacttcaatactgtacattcaagggtcgaatatacttgatgcatcagacatac  
gagtttgcgttaatgaaccaaaggccactaaatcaggaacaccttctctgattgagcagaagtaggaacaagagaaacataacgacccat  
ttgtttatttgcgaatataatgcagcattgagcccttgcctattgagctgcaaaataatgctgtcgaactcgaatcctaaattcgcttggatggctt  
ctttgctttaaataagctgttggatccatttcttaatcgaatgccagccgtaaagacgatcaacctgttcaaagcgaccacaaaagggttt  
tattgtcacgaagaagacggatggattcattgtttgaggtcctaaacatgcataatcaataacaaggatggcaatattacacagagaagta  
ccacgcgaacgaagattggtgaaagattcgtgtccaggcgtatcaataatcaacaaccgggtatattgaactctaatttcccttcttattaacg  
ggttagtcttttcttaacgattcaataggggaagtagtagcaccaattgttgatgatacctccagcttctccttctgtacatggctacgacgc  
aaattatcaaaaagtttggcttaccggtatcgcgttccgagaatacagcaaataggagaacgaagattgttccaggtcagattcaacggg  
agtagctcagaaattcgaactgtcggttgatgcttttctttaaactcctcatgggcaggctcggctcggctttgtcaggtcaggttca  
ggttctgattgttcaaaagcgctcccagctgtcaaaaacggcatcatcctccttcttctttaaactccttcaacaggttagattcttgagga  
ggagcaggagactctacgaggagacgggagcagaagtagcaggagagggggattcattataccagaagaagataaagaagaggatccac  
tcttctagatttcttattagtgtaaacaggttttcttcttcttctgaaagaccagagactgaacgcctgactccaacatttgttga  
cgggcgttgagcttggcttggctcctttgcttttctgaaacgtaacttcttgcagccttaagtcttcttcttcttcttcttcttcttctt  
tttagccttcttcttcttcttcttcttcttcttcttcttcttcttcttcttcttcttcttcttcttcttcttcttcttcttcttcttctt  
ccttcttcttcttcttcttcttcttcttcttcttcttcttcttcttcttcttcttcttcttcttcttcttcttcttcttcttcttcttctt  
gtccttcttcaacctcgggcttgataccccttctctcttcttcttcttcttcttcttcttcttcttcttcttcttcttcttcttcttcttctt  
ttcacgttcttcttcttcttcttcttcttcttcttcttcttcttcttcttcttcttcttcttcttcttcttcttcttcttcttcttcttctt  
tttcttgggcttcttcttcttcttcttcttcttcttcttcttcttcttcttcttcttcttcttcttcttcttcttcttcttcttcttcttctt  
tcttctcaagtggcgttcttcttcttcttcttcttcttcttcttcttcttcttcttcttcttcttcttcttcttcttcttcttcttcttctt  
gttctggttcttcttcttcttcttcttcttcttcttcttcttcttcttcttcttcttcttcttcttcttcttcttcttcttcttcttcttctt  
ttttaccattttaccaccttcaaacctcaatgcagagtggttctggttactaaattccgaattcttttcttcttcttcttcttcttcttcttctt  
actcagctcagtaataagatagcgttgcggtgactcagataccctatagtgcttttcttcttcttcttcttcttcttcttcttcttcttcttctt  
ctactatattctacaccacttagtaattggtataaaaaaagcagcttcttcttcttcttcttcttcttcttcttcttcttcttcttcttcttctt  
aaaatgtaattaagatagatagaatgaagtaagaaaaatgaaacgaaactcggagccatgggcttcttcttcttcttcttcttcttcttcttctt  
cgtaaatgatagaaaaagagtgaaagaaaaaggacgtacatagatacattaatggtgtcgataaaaaatgtgtataaatatacattacatgc  
aaaacttaaaaaaaacaaaacctcaaaagacgttaaacgtaatacaaacgcgatttgcagtacagaaaaatgcaacttgcaccaacg  
cataagaatcttttaaaaactcaaatgagtaacaataagatcatcaaaaaactcgttgagttgcgacttctcgaactaatggaaggtgttgac  
tagtatttgaactaaaataaggatgtatgttcttcttcttcttcttcttcttcttcttcttcttcttcttcttcttcttcttcttcttcttctt  
atgaagcgagaatcttacctgttcttcttcttcttcttcttcttcttcttcttcttcttcttcttcttcttcttcttcttcttcttcttctt  
gctcatcaaaaatactattgataatcaccggaacaattgcagataaatagtcataccctattacttcaacaacaatgaccacatttctccagattg  
aaagacggcagaaccacctcgcgttatacggggatgagaccttcaattgtatcttcaatatcaggaggaagtggttaacgttaacctcaa  
atgtctctctacgggaccaaactgataatagctgcatatcaacaatcgggttaccaggtccattgattgggatgtaatttggaggaatccca  
aatctcggatcgcacgtattgccattaccaatgaattcattgttacaagaagcattaaacctcatcatatcgactggatcactggattgga  
aggaaatggcattggcactcgaactcaccaaatttcccatattcacctagacggcatagctccctagatctggattaacaatggcaacttgag  
tagatattggaaccattcccagtcgcaaaagaggaagtagcttttttcttcttcttcttcttcttcttcttcttcttcttcttcttcttcttctt  
agatcaacacagatatttagtagtagctccatataagacctgtagtaacaaggaaataggcagccgctgtataaaatactaaagcaa  
acggacttacccatattcataaagaacttttcaattcagaatgtaaaaagcattgactcgtccgtcatgaggtatcattaaatttctaaagca



agatagatttggccatttgggtgggtgcatatttgaacataatttagtgttgaacgtagcatacgtatcttggatttatacttggagattttg  
gaaaaacaaaagcggattattcgcataatccaaaggggacaacaagtagtagtggcttagaaatacaccatgagacaggtgtgcaaaaa  
gcctataccactcatgctccgtacatgacacttagtacaggcctttgtgctgcttggcatgttctctgaatttggcatgaagagagcaacgttc  
atgattataagcgttaaagtatttggatctggagaccagtagccgataccaatgcagggaaaagcagggccaagcatacaggtccaacg  
ttacgcctaattcttaatactcttctgttggctcaacttagaagtactataaacgaaggaagaaccactttagcagccatagctgactgctc  
agggttgcgctgcatcttacctcgattgccatcagcttccgaatttagcaaaatgactgacataataccgctttagagaacaagaac  
gccggaacgtcttcagagagccgagattatccaaaggaggaacaggtataggaatcaaactaagtaaaagcaagcgtataaagcataaac  
gtaattctcagaatgctgatacatttagtagcacaactctccagctttaggtacttctcttggcaaatcgaatcacggttgcaactcttgatc  
gaatttctccaagttagtggcttccctcagctccacgtccatctatagttacatagcgcatacctgcatcttcttaccgaagctgaagtagt  
gcaatatacttctgtatgatgatattgaccaatgttttccatccaactgaattgaacgctcgtatgaaccactatattgtagttcttgatcaaaa  
aggaaatttgcgaatattactagcatagttgaccagataccatcaatggcatcttccactctggaagattaaggacggcagcttcaactgca  
aactttacaaaaaacaatggaagtaccatgctcaaaagcccttggcaccatcatatttccgatttctgtctaccgttcttagtactcttgtaa  
cgtgaatggagcgaatcaacacacaatagacacgaacctgatgatattccaataggcattcgatacattctgtggttatttgattcagcatatc  
atagtttagtaaaaactgagtagccactgcttgcagctggcagcttctgctggactctccagtaaaaacagggcaaatgctcactgtttcagtat  
atgtcaaaagttgagcaatcaaaaactttagtactgtacgcatgatagtagtaacaaatgagatgtataatgataaaaatagtgctctg  
cttcccgtttagcaccattcaacttttggtaaggcgcactctataaaacctaatacatagattttacctttaggataaatcttagcaaccagt  
tcgcaaaaattctgattcgaagcaattggttcaaaagtagcagaagataaaagtaagtttgcagaaatagctttagttgctaggtaaa  
ccgaagaaccaccagacaatgaaggagaatctaccaaatctaccaactacattaggtatgcataaactttagtctcaggtatgcacaattgc  
taagtagcatcaaaaaaggataccagaatgctccaagtgaatagtaggtggttgcattgacgagcagcttctcatctttagcaaaaa  
caacgacttattaagcttcaacgattcttatacaacagcacttgcgaattcatttccggagtagcaggaacttggaaatcttaggagacat  
aaactcttccacctaccaatcttcatagagataaccataaccacatgttctggagacatagaagaggtaccaatgttgacgagaattatg  
gttacctaatggtttaaaccaccgatcggatacaatttctggaactcacaatcgacgttaaggcaatcaaccatacacatctcaatgctgaaag  
atcgactggctgttttactaaatccgagagtagccttggatcgttttggtaattataagctactgccttcaaaccagcgtagctcagctacatgt  
agtttgcagcatatcgttagcagatttgcataaaaccaggcacaacacagcacttggggcaccatacagttgtgtaacccgaaaacacc  
gtatgcaaacaccgagaattaagccaatagcttgacgtaaatctaagtaagtaacaaaataaaccagccttactaaccttcaaaatattcag  
atccacggataaaataatccaattatcagaatcgttaggaaggagcagtagaaagagtgccgcaaacagcttctttagtaaaatagtcga  
tgagatatgactacacatgtagtgcgaagtggagacctagaaaattcaatataagcgagatctggtacctgtaagggcgtaagtcaccttt  
cttttaaaagtggaaccaccaaactcatttgtttccacctctacgttctcgccaatgtaacttttagcattaagatccggtgaaagctctc  
aggtagcatcagtggtcaagtaatcgagtgccgtagtgcgaagatggatgttagctcgttgaatcatcgaagtggttactggaactgct  
actacaccggcaataaaacacccaaaagagaaacaatgaaatcgatagcttactatcacgatacataagggcaactcggctccttcaata  
aaccactcttgcgctatgacttgagcaacctttccgctcgggaagcaatctttccatgtgctagacgcaaaccttcccttactatccaag  
attacaaaggccgttttttagcactatggactccacgatagcgaagaacagcagcagatattcgcaaacgcttcaatttccgattcaggg  
gatcagtaacaggaaaaggaatttccggggttcaaaggatgctgttaccagccaaatgtgccattgagcatcagcgaagaatcatcc  
atcttagtgcgactcccaaagttttaccatcaaacccgtaggcatctgcatgatacttggaaattctccattaagtcactgcatcattatattatcg  
tctttagaaggataggatgtaataaccgaatttcaatagaaggatactgaaaatcctgggaattcattgtcgaatacgaaggacgggcatc  
atactcgtttcagaagcaaaaattcgaattgtaattatataatcattatagccattgttccatactcccttgcggtgtttccgcataggattact  
agcattgctgtatgcttcaaatctccggcatctccggcagatgaattcatatcataaagaatccttaaagttataaatacatgaggac  
aatgttattcggctttgagaattcagtaacgctccaatttttgggttctgctggcagttggaacggctcttataaacgctgcaataatttctcc  
ctcatatagtaatggtattacctaataaaagtagtaatacagtagtccaaattcgagaattcctatttacagcgtatgcttcatatttata  
aacatttttaacaaatataagaacattatattggctatttccagacaactgttcaatccaacgaggttaggagaaagaagtacaatatcga  
tgtattataatgaacgctagaaccgaggttcaatcgttttacaagggttgcgtctaggtttactggctctattttatgatatttggattgaa  
tacatgattcaataaatcaaccgaaggttcttcatcattaaatcctgtttgttcttcaattttgcaatatattgttcgacaaagataggg  
taatcgtgcttcttctcgttgcacaaaggatttatttcttaaaagctaaataaatacaaacgagagaacttagttacgcagttatgctaaaca  
acgcaaaaaaacatacggatgcttcaaaattgcacaccaggtcgttatttttacttgatggcaaacgtgcaatgactaagagccaagt  
cgaattgctcactatttccagcctttgcaatgaaggtacaggacgatttttaactattgatgactcagaggatgatattcaatgatgac  
aacgatgctgatgctgcagaagaggagacaaagttccagtaagacacctaataaagaaatcgaaaaagcagaaggaaggaggaaagt  
gaatttagcaacgattttatgttgaacggacgtaaatcaaggtctcgttacagaggaagattcgaattgggattttgaccttccgcaaatctg  
gttaccgtgatgattcgaatgtagtaatttggacgcatattcgagcgtatcgcatacaggtatgctcaagtagtctcaagtagtctgaaagggaaca

aactcaacagcaaaggaagatcctgaggaagaagatattaccctgcattcagatgacgaagatttagccgtcgatggtttggactggagcga  
aaacattggaggcttctgatcaggaagaggaggaaaaaacgacgatgatgatgacattaccgaacctgtccctcatttacaccttacag  
aacgggtgtagaaggattaacgaagagtcctgcttcaagtacgaggaagacgaagaggagggtgctaaaaagaatgcttatttctccgaag  
gagacaaagacagcgcagatataaaaaatgcaatcgcttttcaatctatgaatctatctcgccctatttgaagggtcttccaaaaatgggtttga  
acagcctacccaaattcaatcaaaaaaattccagttgctcttctggaaaagacattgttggtgctgccatcactggtagtggaagactgctgc  
attcattgtccctatttagagcgttactctatcgtcctaaaaaaatacctacttccagagatttggcttgggtcccactcgtgagcttggattcag  
tgtcacagcgtagctacaaagattgctgctttactgatatcgtttcatgcttatgtgctgggtgttgccttaaagcagcaagaacaagaactcg  
caagcgacctgatcattattgctaccctcggtgctttattgatcatatgcaaaatcgcaaggcttacgggtgaacatattgaaattatggtta  
tggacgaagccgacctgaatgcttcatgattgcttgaatataatgaaattattaacagctgtcctaaatctcggcaacaatgctgttctc  
cgctacaatgactgataaagttgacgatttaattcgcttttctaaatcgaccagctcgtctctcgtatgccaataaactcaactgtaagctac  
tactcaggaatttattcggttctcctcaactggaagctcctcgtccagcaatgcttatttactgtgtaagacacttttataaaagaaccatta  
ttttttccgaagcaaggccttgcacataaaatgaggattatcttggactttatccttaagcgtaccgaaatccatgggtcttctcaggaac  
aacgtattcgtgcttggaggacttccgggatggtaaatgtaattatctattggccaccgatggtgcttctcgtggtattgataaaggaatcgag  
ggtgttattaattatgaagctcctcatcgatgaaattatcttcatcgttggagctacggctcgtgctggctaaagcgggaggcagtaactct  
ggcaggcgaagggtgacgaaagttataaagatgattcaaaactcgcagcccaaaatacaaaagggtggttagcgaatcttgagttcgata  
aggtagaatcaccgggaaacaaatgaagacttgaagacgtagtcaataaagtttgaatgaagagaagcaagagagagaggtatgatttt  
atgatgaattcttttcttttttacaagatattaataccgttagatataaattgctgaacgtgattgaaaaaggagagaacattattaagcat  
agtgatgaaatcgtccagaccgctcgtacttgggtccaaagtgaaggaagaaagaggttctaaaggatggtttataaaataatgtctttt  
gctgacacttattagctcaaaacttctgaaaacctgataaaactccttagtaagaggaaaaaacagcttgaaaaaggagaaatgccccgtt  
ctataagaaaactaaaaggatagaatgacaaaactcgagctcgagggagaataaagaatggaatgcatggttattaggtttaaata  
ggtttgggtagtaacagttgtaattatctttatgtttttaaattgcttagacaattctgtaataaaaaatctataactttatttctctatcctagt  
taccatgtcattcaaatatttaaaaaattcatttttagcgttttcttctgctgaggaactgcaatcttctcagcaggaggattcggctgct  
cattagttgatcctaaattaaattgtataccgctttagttgaggggctggagactgagtagtactgaaccagcactaaaagcagggtgactgg  
ctccactaaatgagaatcctgattgggaggattggacggctgagatgaccgaaactaaaagcaggcgttattaccaagattggcggtaaat  
ccactaggactagatgctcaaaaccagaaggattcgttatttgaagctcaaaaggtaaatcctgctgaaggcgggtggcctgtgttactaaa  
gtatttctgtactttagaaccactaggatccgcatlgttggcttgaagagaaaggagaattggtacttgcaaaagttgacgatccaaagatacc  
agtaggttgggaacttgggttgagaaccacttcaaaaccagatggggcagaagcgttggcgggtgctggctgttgggtactttagtaccg  
ataatccgaatcctggtgaccagtaggaccttggctgagaactcagaactaggcgccttcatattccgctagtagccgttgaatggggaa  
gagccgaaaataggagcaggaggattagattggaccaaatgtaaatggcgtggttggatgagcggatcggattctgtaggttagaaaaga  
aaaaggcttatcagtggaagtaaaactcaatgggttttcttctcctggtcatttaattctattttccagtaggaccttgttctcatcgttctgctc  
aagggtttagaagtagaagcatttataaccagtggaaaaagcagttgggttttccgttggatgattttagctcactagatccaaagaaa  
atacaggagtagctggttccatccggttcttctgtttagacatcagattatcttccattgacatcagagggttagagaatgaaaacat  
agaagtagtgggttttatttttagctacttcatccttgcattgggaggttccaaaactaaagggtgggttggtagcagctcctaagctcg  
tgggctgacaaaagtgaaagtaggcttagcagcattattatcggcagcgggaattgctgattcctattttcattcttggcgaatgattgtccaaa  
gctaaatgaaggttagccggagcaatctgctcatcactttaaagagctgctcaaatgaaaaagtcgggttcgagacttctccttttctcctcg  
tagtctttgaagctcagtaacctctctttagcattttggcgaatgtaactcggggttctgtattagctgaggttacaatattggtttaggtt  
cagtagcaatgtagcactctttgtcctgtactgggtttccgaaagtaaacgctggtttaggtgattgctgattggtgagctttagcagctttagca  
aaagaaaacgctggttcaaggcagtagattccttgttctcggacgaccgacaaaatgaaagtttaactgggaacgttcaagttgttttgcac  
taggtgtcgaatcagcaacttccacttttgttctcggatttctttagataggagctaaactggcaaaataatgaaggttagtaggaatttctgat  
atcttgcgatcagtaggttagcaaacgtaaacgatggagtaataggttagacggctgttctgagaaggaagcaaaagggtgaagaaggct  
tactactatttccgggttcttttctcagatttttccgaaatgaacgaaagcgcgggagcctgctcgtcttatttgggaagcaggcttgaagt  
gaaagcaggttccggagcctcagtttctacgaaaggtcctttcagaaggctgctcaaaagtaaaagggttttaggtgctcaggttttca  
gttgaaaaagttgattgaaagctcattggcttattcggatgatttaccaaaagaaaagatagggttttattctgatttccgtaccttccggtt  
cagcaatacttttaggagcactagtagtagacttaactcgaattttgaatattgctggacaaacttctggaagttttcggatcttcttttccg  
gtatcgtgcaaaactctttagtgcttgggtttagattcagccggagtgaaatgtagtcaattgtagattcagctgtctcgtgggatatctt  
ccttcttgggttttaggataactgctcggtagctgactcttctgtaccagaacggttacgcttggtagaatgaggactgaagttgttca  
aaggtaggacctgagcaggaagcaaaagtttaggagccttttatcaggaccgaaatgagtggtcctatgatttctcatagaacgggaagc  
agcatcggtcatagcgggtcttcatcttatacaaaaagctcatctaaatcttcatctaatgcaaaaaggcagctctcacacgtttttgttcccc

ctgcggcaggtgggaaagaatattcatattcagagacgaagtcctgtttgtttacggaactagaatttcaggttgctcttcggtttggacttcagc  
attcaccagtttctgtttcttaaatcaatgcgttcaagagctctgtaaacaataggaatcaactcttgacgtaatcttcttagcttctttgaa  
gctgaagtcacacttttcaatcctggctctccctacggatcttttgggatgtaactcgatactactggacttttaggtgctgcgacttctgatca  
gattggaaatgttcatctgaagaatagctgggagctattgacatctgtccttctgtatcagctcttctagtttctgaaatgggtctctgggggag  
atccctcttctgcaagaacggcgtcctatacgtgtgaaggcacattcttttctgtagttagctagtgataaattgagatacaggagtaatatga  
ggaagctacccgattgggggtttgtcgaatggagcgcaaaatgtcgagcaaggccgagaagaggaagtaaatggggggtctgaagatgag  
gctcagaagaaagctgttggtattttctggcggtgaagccgattgcatgctacctctgcgggaagcggtttattttctacaaaatcctgggaaaa  
ttgcttagaagacaaatcatcttcatttgactttcctcaattcctatctagtgctgaatgtgactacggttattatgcaacaatagtctatatga  
aattagcaaaatgttctgaataaaagaatcctcattctttattactgtactacggagttctgccaagtagtgaggactcaattctggatccaat  
agacttctgaagctccttatgattaggcgtttctttcagcattgtctgaccaactattgctgaatggctgcaaaacagaagcagctgtagcctt  
caaagccgaaaaaagggtcggtgatttccgattcatgtcggtcataaggagttctttgtaatttcttagtcgacggttgatttctgaagcggga  
ggcattaaataagcacatcgacgatgagaaggaactgtggtaaggcgaattgtcaagcatttctctggtgcaagtggttcttaagccgaat  
agtgagctctaaggaataagtaacttccgttaactaaggatattgtacgtgaacatttctgttatatgtttaaaaaagtaactaatgctactaatg  
cgaggaggtaaaagtagagttggtgtatacctttagacattgggtttctgtatgaaagataatcctaagcagggactctttaaagcagatgagca  
aaacaagttagctagatatgttttaagaatgactttgtacatggagggttagcagatccaattatgatcactgaatctaatgaaaaaattca  
ttcatatacatatagatgataaaacagtgatataatataatattttatgcaagaaatagagacttccaggcagcgcatttctgctttc  
ggtagtaagctcaaaaatagagttgtcataaccgaaacaagaccatgtattttccacctagtaagcttcttactggtaccaacaagta  
gtgaagggcaggcagctccttgacatgatttacgcaatttttatcttcaataataaagggaaaccttagactgacaaagttttactccaattgaa  
gaatcggatcaacaaaggttactggcgaatattcattcagatccaaccgtacggctgcatctgcaatcttctgagagcagcttgattgctg  
gaaaaacaggattttatctgcaatagccatttatatttggtttgggtgagtaagcagaaagcgaactgggatttttagatctcattcag  
gtttgttcccttcccttaattcggtaaagctaaacatcaggttttgggaagcttagaccgctgttaataacgctgtgtaactagattggta  
agtctcagtgatcgttccaataagaacggattccaagtccttgcctcttctgttgaccgaatcatgatatttttggcttttaaatattttt  
tgattaatgctgtatcataattgaatgagcttaacagattctgactcattcgactcaagtgataaagcgtccatcagaagatcatcaaaccg  
ggtctatgacgattcgagaaagagaaaagaagatgtagagaaatgctttatattatacaggaatcataaaaaacgaactattactaactcgttc  
atctcaggtgttaagttcaggaaatctgcaatccttgcgaaatgcttccggtgagttggtcttagaaaccaattgaaacgaaatagttgcg  
gcttgaaaaaccaaagccaaaacaaagcagctgggggactaaactcggtaatacactcagttcttctgctacgagattctaatgaacctg  
taatcatgtttcgaacgatttcttctataggagcggcttctgaaatagtaggaattggaagtagtggatagttataatcaccaaaaggcactc  
tttgctgagtataaagcggttctatctgctcatcttctcaaatatattcctcctcataatgctgagattcgtgtcaaaaccggggatagagaa  
gtaagtttacttgacgctggggagttgtgtgttaataaacgtacgcgtgattgatcgtatcgggaaaccagatatttgcctggccacctgac  
tgaacgaaaccggtgattgtcgaatcgtgcatcatgtctgtagggactgacattcagcaggttcaaattctcatagacataccgatc  
gccctgaacgtttgaatgctgtcgcacaaacgtcttgaaccagcaacatcttccaggctttataatcggtatcctgaacacgatccatg  
atggcgttatataatcttaatacgaaggcatgccaatgagataacgcaagaaaggcatttctaacacataaggacattctggtctaataag  
ataaatatccatgggtcttctgcaaaatgcaagccagttggctacggcaaaaaggggtttgttccaataggaggcgaataatagctttac  
agaagaaatctcgggacgggtcgaacaggagccaactcctgctcaagcaaaacccaaaatgttgttaagaatagaaagataaagtaatcga  
aatattgtacaacaaccaatccataaagcagctgtaacaaagaccggcttccctctgttcatatactctaaagcttctgaagaagtgtagcc  
ataatgagaaatggtttaagccatgtgactgtaagatacctctttaaagaaatgtgtaaggatcgttaagtcaatatcatttgaagg  
tgattcaatggccataaacgaggacgaggtaaatgtccatgcagaatgatcacagcagctcttccgccaaggtagcaataagcaaaaa  
agaacaataaagtaacaaatgcctataaggacatgtagatgtgattcctaaaaatgttcatatatacagaaaaatagattacacaggcttc  
ggaacaaatcaaaaagccctctgttttgacaccattgttagactcaaggatgacgtttatcaatcataactcttacctgtagatttccctgaa  
ggtcaaaataggctccaattcttctattatatacagcaaaaaagagacgatagaataagtaacaatcctgtgaataaagattagcaaacatt  
catgaacgaacaatttcaaaagaaaaataaataaaaaaagaaaaaggaacgaacattaacaaaatccttactacaga  
gcgttgaaaaacaggctttctataatttttaaatgagaagcgttgaataaacgataaaaccagggaaatagaacaaaaaagccgataaa  
gcgacaattcgttttccatggacaagtcgtgaaaaatagatgcaaaagtgacaattataaataaaagtttctgctcttgattgcttttctttt  
aaactccagatatttttcttccctcagctacatgcaattcagttactacttaaaactcttgggtatagttctgtatagcttttcaacttcaa  
ttcttttgaattgctctgtagttcaactcatcagattcgcctgaaagtaacatcgtacttgagaatactgagtgcaacaagcatccaaggta  
gaaatggaagaattttctcatcaataacgaagaaaactcaatttgaactcattcttgaagaattcctttcatatttcaaacctttctgtttgc  
gagcgaattgagcaataccgaatacatgaatccatattgtttactagttgtctgtcctttgggagaagatgatgggagaatgcttttagcaaca  
agaagaagggttcaaatcacataaatcgattcaatcgtgctctcatgatctaggttattcagaatacctagcctatagaaagtttgttactac

tactttactactggagctatctggcttttggagttcaacctaacattcccaaattacttctctctgcttctgctattatttcaagaatttctttttttt  
tctttttgcatgggctacatttgaaccaatagccaggttccagtaatacaacaatgggttatattcttttcttttagcagccttcaaccaaga  
cactatgcctgagtggttaaaggatagactagaaatctattgcggtctccgcgcgaggttcaaatcctgctggtgctgttttttctctctcca  
tatcgaaggaaaacccaaaatttacaaggattcaagaatggtgataataacagctgacttctaaaggcggctgactttgaaagtggttctat  
cagtgatttcaactaccctgttcattcatttttactttctttattgtttttttacgagcacgttttcttaatgcagtaaaaaatttggcaattctac  
tgttctactctaactatttcttctataagctggtttctgtataatgggtttcaaggggaatggaaagcttaaaaagctctcaaacgatgaatgaaa  
atthccagataactgggagactgtttacaatgagattcgagagatgaaaaaaaatgtagttgctcccgtggacgtacaaggtcacatacact  
aggtgaaaaaacagaccctaaaatctttcgatttcaactctttagctttagctgtcgtcagtgcaaacgaaggatacagcttggaccaacat  
gaagaactgaaggaaaatttgcgcaaggactatgtctacgggcaataagagaaattgacgaggattccttaacaagcttatcgaaaaagtt  
ggattccataaccgtaaaacaatttatttaaaacaatggctcaaattctggaagagaaatgatggtgatatcctaaaacggttgaagaatt  
gatgtctatacctggtgtaggcccagaatgggatactttgcatgggtattgcttgggacaaaattgtcggcattggcgtcgactacatgtacac  
cggatttcaaatatcttgggctggtgccacacaaaaacagaagagcagactcgttggctctgcaaagtttctgcaaaaacatctatggcatga  
agtgaattatagctcgttgggtttgggcaaacatttcttccaagaggaaggcgtgtgatatttgcacactcgttccaaggactatgtccaa  
gtgcatatcaggaaaagagctggtgagtgcaaacgctcgaaaaactacgaaaagggttaagaaacgttctcctacagcttcccagagggtca  
gtaactcaagagcagaagacggaatacagcgaatccctactggtctgaatgaacttctctgatgctgtccggaaaagaaagttaaacttg  
agtctctgtaggtgacgaaagtcagaagaaagccttaaggaacaaaattacacagaaaatgcagatcaacctttacgacggtatcgaagaa  
cggctgctgtggcctctgaatattttctcgcagcatctcaagatataagaagactgttttaaaattactatttttctgtcatttttttctctaaact  
gttatttaattatgattgattcatcttgtttattatccgttctcgttttttaaaaaaaaagaaaaaacaattttctattcaciaaaccttt  
attgctttgtatttctatttagtttcttaaatagattctataaaatcatctaatagtcatttcatttttcaaagcaattcattttttttttgg  
atthgatgcgatcaatcgtcccagaatatcacaatgcaataatgattaaagtacagcagagctgtgaaaacataatgagtacagaaagatt  
catctaattcgtctgtatttggcgtgtacaacataaaatcgataggtattggtccagttacagaaacatcattacgaatggaaggtttttgtctatcg  
aatgctcgatccaattcgtaaagacaccagtggtatcccggagaacacgccccttctgtaccagccgattcagcgttctgattatctgaattat  
ttaaattgttatcaccataattgctatttaacgttagtaattcctgatgaaacaagagcttgagcaaaaacctttgaaataactaattatagaat  
caagagaagcaacggctggaaacttcttaatactcaagcatcacctcgtcggcgttactgtgagtttgcataatactatcgatagatggaacat  
gcttttttctgagaattgaaatataatgatcttgagaacaaccgaatcagtgacagaatccaagttaaagcttgaggacgttagcttgaaggt  
ttgcttgagaaacctcatgggcatcgatgaaatcaccaaatctggttgggacataactcgaagatacaacaggagtttttcttctttt  
atthttataaatgagactgcattcggacttaagtcggtaattctggatgagcttgttcgcacataagtagtatgtcaaccaaattgtaggttgg  
agactaaacaaataagacctttttctccagggacaagctcaattctttgtagtagacctcaattaaaggctttttagttttctgttcgagca  
agcgttcaaaaaccattcgcatttaggagaatctaaaagtgaatcaggtatatttgggtcatgacagagctgatgaaatggggcattgcaacat  
caciaaaaaacgatgcgattttaggtggtgattgtaagcgtgacatatacaacatttcatcgtcaaagcaatagtaggcccgcgaccaggacc  
acgttttctggttggtaatttccaaaaggatcgaatgattaggtcgatgaaacttctcggacttcttttccaccttccatataaattgtt  
ttctttaccttcttcttgaagattgcatcagcggattatcacgttctaaagataatcagttagaaaaaaaactgtatacgtcctaaattta  
cttacaattgctaaactgcaggccaagcttttttctggcaaaattcatggcaatggacattggaggaagaggtgacgctccaggaggagcca  
aaggattatgccttttctatgagactcgttacttttggagaaccactctccgatgaaacggacttgcgaagaggggaatccttcttgcctttc  
agcccatcgtcatttctggttaacagcaactcatccttagagccattattagataaggagccaaaatcttctgcttttctgttactggaattgact  
gaattcagtttccatagggttagccggttccatttcttctggtatctgtaaatggttggcaatgaaagcagaaccaccgctcgttctacgct  
caggatcatcctcatgaaaaatcgtttagtaaggaattctgaaatcgacgatcatcatcgaatggaagagatggtccagaattcagtgat  
ccgccgtcatctcataatacgggtgtccagacattagttttatacaaggcaataatttagcacaatttaataaagtacatccactgaaatagaac  
acttacgaagatttcaaaaatttgccttgttacgattgtattataaggaatctggaagactagtgaaatgtaggaggaacgtagctgttaactt  
tagaataaagtagtatatcatgactcgtcaacatgcttgggtgaggttctatgtgactttacaatatcatacataaatcatactaagagtttt  
tttgatttcttttcttttctgctgtacatttcaactgtttttttgttttcttttcttacttttgagttaaagaaccctttttttgagagg  
attcctgctgagggttcataaagcatgattcttctcaacgcttactcaaaagacagaaaaggcttgataaaggatagttatggatccaatccct  
ttacaatgagctcctttgtctttgccactaacaacaaaaaacattaggatgctgtctatcacctttgttggccttttattacttagaaatgccaacgc  
aatttctgtaagccctgaaatggattcgacaaccaaacgataaaacgggctgccttctgctgcaaatggcgaattcgtaaagaaatattgga  
ctaaatgtttcacaatgaacatttagataggaagaaggatgagagaggagcatcttctcggtatgatggacatgatcgtgaatcgcgtagac  
ggcgtcatgaacaggatgaacgtggccttgagaagaagagaacgacgtgaacgggtcacatagctcctcaaggaagaggttctatgagggtcaag  
aatcttataaacgaaatgaggagcaagagtttctcgggaaaaatgattatttctgttctcgttttactggagctacagatcaggatacctcaciaa  
ggaacgatttaggcttggaaatttggagggaatggactttggagtgatggaacacgtatgtcgaagaacctgcttatgagaacctaaca

aactcctggggcggtttatcaagctactcaatcagatcgtccttctggggacacaactagggaggtgatagatgaacagcctgcaaaaagtcagc  
gttttagtacataattgggtgacaatgggtcacgctggcgaatgatgaagcttcggcgtgttttcgacatggcaaaggatagccatcgacctgtg  
aagatgtggctcttgaaggtatggttctttagaagagtttgatgatgctttagaagaaaaagaagagttagatcatcgaaaagcaacgggtaa  
aataaaaaaagatgcaccgacaggcgaaaagatcggaatcgcttagagaatgagcgaaagagtaacccttaccaccagaatcttcttcttct  
tttcaaagcctactcaggatgatttgaataaagtaaaagcgcagggttttacgagcgcaggctaaaaactctcagactatgaagcttgaaca  
gcaatgatataccatgataaaaaggttgaggataccacagacggaaatgatcagtcgccgttgaaccatttttaataaaggcgaccctcta  
tcaagaaatggttcaagaggagaagctttgaacaaattggacaagcatggattgaataaggactatgcaaaacgtattaccagagatagca  
gattctcgaatgatttcgattatctcgatgaaaacgcaaacagattagccgatcgtatgaatcgaagagaaattgatatgaaccatgttttcaag  
gaggaaatttacaataaagaccgctactcgattcttcccgttgtgatgagatattaattcagaccgctagcacctgtcattgcaactagcca  
tcgtgtgatcttctttaccaacgaaacctgaactagcaaaagatcattgcttaattgttctactaatcaccgtgtaaacatgctctcctgtgatga  
agatgaatgggatgaggttaggtatgtctatatgtttgttcttgaacatttgcggaaattaacctgaaatagaattttatgaaatgcatcgct  
ctaattgttgattctatggggatgggtgttttctacgaaaacgctcctcacctcaaagatttctacatactgcaatagaatgctgacactgtacct  
aaacgcacactctcttggcaccagcttatttctggaagctatttactctgatgacgaatggcgcagcatcgcaaaatcattgatacaatga  
aaggtgctgaaaaatgaaaaattggccttccgaaaaatgatggtaaagggtgaggaaacatgagaattattttgaaattcctctggatgctcg  
aacaagactaacatttttagagttgggctatttcatgtttggttcacggtagacgggggtttggacatgttgcgaaaatgaaaaaatgggg  
tcaacatgatcaagttcaaggaagatcgaagatgcttaacctccaccggaagtatacgaagaaggcgaatggactggcataagg  
gatccagctgaagatgcttccgagctgcttccgtccattcattgactcaaacctattggaatgatttctacttaagactttttatttttta  
acatagtaatgttgatactagttgtaagaaaaaggaccattggaagatagcaccagggaataatgttgaaataaaaaaaagcttcttctac  
tcaagaaaccttaaaagttttacagtacacaaacattgttcataatcataaaaaatgcacgttaaaattcaagtttacctgtaaaagtaaagc  
cttctgataaaagcaactatagcatttaccgagtattatagcagctaaagcaagcacatctacaacagcaatagtgatgaaaatacttactga  
aaaacaatctagagcattcaatataatcaacatgttattagatactacctcaaatcgtatcagtgctttttcagtaagctctctctatgttgatt  
ctttatgtgcaatcatcactctccagaatctgttgaacccagtgctgaaaaatcctccagcaactgttcattatgctaaatagtaagtgtg  
atcttgaatgaaaagttactacgcttctcctcgaactatagccaatttcttcttcttcttcaagaaactcgagtgcgagaatgagaggat  
gagaggaattggttaaagtataccagtttattgtttgatgatgaatttgatcgtatttgcttggatttctgaacactggattactaacgttga  
gaattagcaaaccagccagatttcatgcctccacaataaacggcagaattatgctcaaatcaatttgacttggatgcccattttcaaatct  
atggacttggaaaccaagcacattgtcgtctatttggtagcctcacaaccaacgaaaaacatgatgttctcaagtcatcaccggaaatt  
gcattgctaacttgcaggatgtgaataatattgttctgggatcgacttctgtcaactcagaagaatccatttgaacttgaagaatcgccttc  
aaatttcatgctcatcatttaacgagtatagcaatgatttttagtaactgaaagcgaactatacaatgattggacagtgctcctaaactagga  
ttttgacttggggctccggaactccgtctctggctgaccttttcaagagtttaagagtttcaatatacttaagcaaaatcgttctttactgtt  
cttttcaatggatcatccactcagaatgctgacgaggggacgagtttaaaagcagcgaattcaagaaactcagctataggaattgata  
agaaaaccgagttcaaatcaaggagttatttttactattgactattgagtttaacacatcctgaagtcatcgtaccttgcagatagaattaagaccta  
gaaaagtaaatgtcgtcagcagttgtaaatgttctaaaactatttaaatcgaataagtaaaagatggttttatattgatcgttctgttttagaga  
actaaacgaaagataataatactcttttcttgggcaaaaggaagcaaggcagaaatcatcaaaaggaagacaaaagtagacaatac  
aagaactttgataggtttatataaggtttgcttagaaaaacaagagaatacgtgtgatgaatgctactcaactagaacctttgaacgctttt  
ctatcaagtgtatggaatggtacagttggcaatggaacgattgctatttggagacaacataactggccaagcataacagaagaaggaacc  
gttttggatggagtgaaatgcgatagtcagtgaaatggcagggcatggggctgttgggatcgtgtccgcatgcttgggttctgttaatcc  
catttctttaaataagacatagaaaattaatgtcccggagcacaaggggttccagagacgagccgaattctactggatgattttatgatcct  
ggtgttggcgtctcagggttgcatacatagatgtggatcgaatccggttcaaggttgcgatgtgcatattctatttgccttactcgaatgt  
accgattctagtgttgggtatttggcactatgtgagtagcttggattatacgtggcgagagctgacggtagtcggacgagaagcagatggcag  
tgaacgaagaaaaaggatagagacaatggaatacggaaatccaattgtgatgtatatactgtcgatgctgggattctactggccgggttcatt  
cttgggcaagaatagcgcggggagaggcagcagtcgcgacggacgcacgatttaaggcatcagcggtagatcaatttttggattaggtgctg  
tgtgggagcattttgtgtatattgaaagagatggacgtgaccgaagaaaacgatggatgagcgtttataggaggcctgatggtgctcctacg  
aggtgtgtatggatgtatttccagctggaatacaactggaatgcgagcaatccaaaagtgaaaccagggatagcattcgacttggatgtg  
cggaaactatttgggaacagtgatttgttggatgattatcgccaggaatcgtgaagtggagcgaacttgcagtgagggaagaagagcaa  
gagagaattacacaaacaacgatggatcgtatgcaagtagcatcgacggattcgacctggggaagacggcttctcggcgggcccccggcc  
gcccctcgacggatcaatgccacctcctcgatcaagaagtattcgaatgatagtgaggaaagctgaaaaagaagacaaatggaggtg  
acgattaatagaatgaactagaggataattgcataaacaagaacgttcttctcataaaagcagcaaaagcagactagtgaaatctacatttt  
tattttcaaaatacaaaagaagaattgtaacaagaatttaaaagaagaatacataatggcaaacctagtattgaaacccaatcgatgtaa

catatntcatggtagaacattggaatgaagaaggaagaaaaacagaaaacagaaaacagaaacaatccaacctctcagtgaaacaatgt  
agctagaaggactatntttgntttattctattgtttattctcgataattgagaataaagatgtacacgtgaaaacgaaaacgaaaatgtc  
agaccctaaagtgtgggaaagtagacgacaaaacgcaaggaggcgcaatgcatatggatagtgaaaagggtgaccgagaaagattcattcg  
caaggttgtcattcaggggaaatgagtttttaattgaggagatactcgcaaaatccttggcacgaaaacaaagttttgcaaaagtaaac  
aaaagatgaaaacaaaaatgaagagttgggttctatnttactntnttctatctntnttattnttctnttnttnttctnttnttctnttntt  
atcatttctcatcgcaaaactccatcaacagttatnttctnttctnttctnttctnttctnttctnttctnttctnttctnttctnttct  
atctcgtatctccaacgagtgctcttctctcgcgaaaatacttctcgtatctcgtnttctcactctgattcgtcgtcgtcagatgatgacataa  
aaattctactcttccctgtttcattcgcacaagcatctctctcgcgactctnttctctcttcttctcttctcttataaaaagatctctctcc  
ccaccacactactccatccaccgaccgtgtccgatcttccatcatcagcaaacataatcttctcttctnttctnttctnttctnttctntt  
accgccaatacaagagtcataagtagtaagtagctctccatccgcaatataaaacaaagagaaaaagctccttgattatnttctnttctntt  
tatttctcgggggtgttttctttctatcccaattcatttaatttgcctttattctttaggttcttctgtttgttagtcatttctgtctgtttct  
cccatcttctatnttnttnttnttnttaagatccctctatacatttcttgacttctcttctctggttcttctgctcagtattgatcaagcgacataaacgat  
ttctctctctctctctctnttnttnttnttnttnttnttnttnttnttnttnttnttnttnttnttnttnttnttnttnttnttnttnttnttnttnt  
ttgatntctgagtgctctatcttctcttcttcttcttcttcttcttcttcttcttcttcttcttcttcttcttcttcttcttcttcttcttcttctt  
atgtctaatgcttattcttctcaccatttgattctatcaccggccaggctcaggtccagctcctcaccactcttctctctctctcaataccttgc  
ctcggctgattcttctactcgttttcttcttcaagcctcgccttctcccttaactgtatcgccaaacggttcaacagcacaatccagctctct  
tggccttctctcttcttctcgttcccttcttctcttctctcttctcttctctctctcttctctctcctctcttctctctctcctactctcta  
cggcggtcctaacttcttcttcaatcagaatctcccaagttccttccaacacctcttgaactccaagaataaacaactnttccaacttaata  
atcaccgcaatctgttactcttctcttataccaattctaacaactatatacccttactctcagcagccatgttcttccagtcatacagccaa  
ttccgaactactatccgaaatgatgcttnttaccacttatgcttacttccttacataatctctccctcagccttataatntgactaccagaatttacc  
cttcttccatttctcttccaagcaaacattcactcttctcgcctctacaccagttaagtttctacctgagatcagccttataacacatc  
agaagcagcagcccgatgttacttcatctaccttgatcaaccttgcgaaaattatccgctgctgagccttatcttcaacgcgaacgttctt  
tatggccgaataatnttactcgtcgttaacctcattggtccccgttcataccgagataatgaattctatgtgagcaaccagagcttgcacaa  
atcataaacttgcgaacgaaagcgtcgaaggaatgaagaaacttctgatgattgaggaatgcttctcttcttgaataagatccaagctt  
caaatgggagttgtaaacctgctcattgaatacattgaacaataaaatcagagcaaacaccttgaagcccatataaggaactcttgagga  
aaaacgctgcaagagaaaaataaaactgatttgataacctgttctatgctcaggttcaattcgtcattnttnttgggtatgnttaagattctg  
tttctatntctgctatgntataaacntttatnttnttnttnttctcaaacataacggttctnttnttnttnttnttnttnttnttnttnttnttnttnt  
gacttctcattgatactatacttnttnttnttnttnttnttnttnttnttnttnttnttnttnttnttnttnttnttnttnttnttnttnttnttnt  
tctaccaccattgcggttctnttnttnttnttnttnttnttnttnttnttnttnttnttnttnttnttnttnttnttnttnttnttnttnttnttnt  
ttaaaatntcattataatgcttgcgattgagtaatcaacgttnttnttnttnttnttnttnttnttnttnttnttnttnttnttnttnttnttnttnt  
cattataatcagattaatagacctttagtntaattgaatagtaagaagcacataatgaaataatnttnttnttnttnttnttnttnttnttnttnttntt  
gtaataacgcgagttatgagtcattgaatagagaggaactgaacaatgatgattgnttccatcaacagttacttactagttatctgaata  
caataagtagcttnttnttnttnttnttnttnttnttnttnttnttnttnttnttnttnttnttnttnttnttnttnttnttnttnttnttnttnt  
tatcttctccttcaatgtgaacctatgtaaacctatgtaaacctatgtaataatnttnttnttnttnttnttnttnttnttnttnttnttnttnttnttnt  
ccttnttnttnttnttnttnttnttnttnttnttnttnttnttnttnttnttnttnttnttnttnttnttnttnttnttnttnttnttnttnttnt  
gatattcatactgagacaaaacatagtaagtcataaaaactagaatgttactgtaggagctcaaatgcagcaacttctcacttctctt  
cattgcagcaagtcagagacaaaactggtggccgagaaataatagagtcaggttactgtgagatcagctcgttttctgaggggtgaa  
acgtccatccagtagccggatccaatctcgtcaaatgaattggtctcagatattccaaaagagagctggggtgataaccaccatagt  
taccatagaactgatcctggctagggtcatctgttaacaaatccagcaatcttgggtaccaagctgtgaataaagtcgtnttctaggtagc  
acaaaatnttnttnttnttnttnttnttnttnttnttnttnttnttnttnttnttnttnttnttnttnttnttnttnttnttnttnttnttnt  
cagcattctnttactagtccttnttnttnttnttnttnttnttnttnttnttnttnttnttnttnttnttnttnttnttnttnttnttnttnttnttnt  
atacaatnttnttnttnttnttnttnttnttnttnttnttnttnttnttnttnttnttnttnttnttnttnttnttnttnttnttnttnttnttnt  
atttctcagagagnttcaacaaaaacattgtcgaaccgggcaatgatttgctcaattaggtaaacagtaacaccaaggaccttnttnttnttntt  
cgttaaacgaaagcttnttnttnttnttnttnttnttnttnttnttnttnttnttnttnttnttnttnttnttnttnttnttnttnttnttnttnttnt  
ccatttctgaggacaaatccaccataatgatcagagtgaaagttagataaaagtaagcttcaacacctcaatagctccatagctgaaagcatca  
acggcgaacggcactatagcatgatgctataaaaggaacaaggctgattnttctcgagtttaccagcctcaaggaaggcgtnttct  
aggatcaacaacgattgatccggttcttnttnttnttnttnttnttnttnttnttnttnttnttnttnttnttnttnttnttnttnttnttnttnttnt  
cgagacaggcattcactgctcattgggttcaacagaaaagagccgaaaaatnttnttnttnttnttnttnttnttnttnttnttnttnttnttnttnttnt

ctttcatttcgtaactagaggactttaaaggtccagaaaaccagcttcactttgaggcgaccattgaggaggtccacattttccagtttagcg  
aaggatcattaaatcgttctaagcttcgggagaaattctcaattgaaaactgggaagtctttgctttaccctgtgttgggatgcctcaattgct  
gcagcctcattccccaaatgttgcgaccgggtgtttttctgaaaaaatccaagatggtggaagtctttctttgctcatgataccgtatagaga  
ttggaccgtgagattattttttcttacgacaccttaccaaaacaattcaaggataccagttcaaaaaagaaggattacttctgggaccgta  
acgctaaaccaatgcgataaatgagatttcgctttgttctcaggaaataaagctttacaatagtagctttacaaaaactgggaatgcgaca  
aatggctctttgggataagatttccaaatgctttaaattaattttaagaagtaaaacaaaaaggaaggaacagctctaattcggtagtaaaa  
acctaacttctactagtattgtttagaagagcagctaggtctgagaggaaaactgctttatgagtcgttaaaagcagtaaaaacctcgaaaa  
aggttttctataataaacagaaacaatccctccaaaaagagtatgtttaaaggtcaaaaataaacttcaaagagatttagggacaaattgaa  
ttgcgctcatcttgggagtcgctaatttcgatttaggagttgaacaatttcgctattagctgaatgaatagtaaacatggctattgaatcgaaatt  
gaaagatccgaaagtattttgtaaatattataggaaaatccagttataacttgccttttgcctttgagaagcaatgctcgagatctttatg  
ctttgcttcgaagtgtctcttcgaaagtaagggaattctgaggttcaatagagcaaaacacttggagtcggagacgctggggttttctat  
ttcaaaaaatcttcattagttaaagcaggaaagcgttcggtagtgactgcacctacagattgcttattacgagcctgggaagcaacgaaggag  
aaggaggaggagccttgcaaatggaaagaaatccatcgacaatgtgctcttcaacttaaggcaaggattaaataataggtatgcttcatt  
tttcgaattagctcaaaaacctcatttgcctttgtgtaagtgcagtagacaagttcatgtaaacaaacaaatgatgacccgtccgacttg  
gaacaaacagggtcaagaaagtctagaaaaaacattgataaggacaatctttcatatttgataaggaggatttatatacacaggaaacga  
ataaacaagcagtagtagaataataaattgaactttctcctaactctagagttgaaccaaaccgctacaggcgttggtattagcatatcgagaaa  
taaacctatccgtattgattcaatatctgtgaaatatttcaatgtaattaggacgactcaacatttttcggaatcaggaagaaaggtaatatag  
ccagcaaatgatcaatggatgccgaattcgttgcgaaaaatcatatttgcaaaacggcatccaattcctcaccgttatgtggaagtaattg  
ctagatttccaaagatgcaactcatagaactcggatacaaaaagaagattgtttccagaaaatgcttagggtagcgattagcgtatgcatat  
actgaacttggtgaggaagtaagaaaggtaaaatcgagttgcatcctccagggtgataaactttcttgaagatatttttgataaaattaaata  
gcggcaatccgtcacatttgaagcagggaaagtcttgtaaaaactgtaaaacaatcatagaaggcgttgctaaaaatcagacattgatagca  
aggcttaagtttctgatgaagacgatctcattcccaggcacctgtattgaagggtttatagtagcttctagcggcgtcaaaaactggaacgttt  
catctaaagcccttgattgcacagctgaagttccatcaagagttgatatttcgtttgtgctgataggcatacttctgcattaatagaatc  
gccttctctggcttaccagctttatgtagtttctcctagacgaatcctaagagtaacagctgttccaagtcactttcaaggttgcagcttttcta  
gcgtctctaaagcggcgaaggttttcgtaatcgttttcggcatcaaaaacagcagcaagctgcaagcagcattggctaatagttcaacttctaa  
ttccttctaacggcgacaattgcgcatacatatattcaacaggtttttcgaagtcgaggcaagatataaccagctgcatgctaaataatgatg  
aacagcttcatacgtccgctcatctcgaccagattggatacatattgaaatgcaattccttaactccacgtgcagttgttgcctgtgtaatgta  
aagcgaacatttctgaaattgctccttcgaaagcttccctttaggaaagaatgcaagacttcatccatgcttttaattagattgttttctcctt  
taactataatgaaaagttccctgttttccagatgaaatggattttgtgttcatgtacagtttgtttatagagaacttgatcgattagcagaatg  
gtcagctctatcgtgggatctattctacgagaaaccagctactacagcaaatctttattgaaaatcgttgattatgaaaagtagattgggcaa  
aacaagacggatccaaaatctactctgtagaacaagaactcaaaagaagccccaaaattctctggtgttccattcagtaatagtctgcttaggc  
taggaaatggtacatcttcaattcacagcaatacttgccttcaacgtccagcttattcccactactcacagtaagtaagttcacaaaa  
gctacatgttcatactacatgatttcctacatgatattacaacaaaggagaaaaacaaactgcaacaaaattagaagactagattgcaaa  
ggctttttattgcaaaagaacggcgactaaatctagtagaagaaaccgaggatcttaccaccagtgcttggcagcagcttctgtgagacatg  
ataccacgggaggtagtcaagacaatgataccaacttgacgagagggcaagagattgtgaccactttcaaatccttgatcttgatgttag  
cggggagagataaccacactgttgatacggcgttcaattggataacaatcttgcagaacgatggtcatcaatctcctcgaattcgtcaatg  
taacctgctttgcatgacggtcaagaactgacaatgaccttgaggaaaggacgaataagcacttgacgacgtccacgacgctcagcgttaac  
aatgttgcctcaaacagtcggagaggacagattgacgaaccatttctgaaaattgcttggatggagaaaggagttctacggcaagaagtcaata  
atctcacactaaaaaacagtcacattgttggagctgactttgcgagtcgaatgatccatggtagccaacttactgcagcttgacagccccagt  
atagtaataaccgaacgcaactgaaagattagtaacaaaaacaaaggaacaagagttttgtgaaaggctcgaggcataaacggaggtgc  
tttggaaacgaagttcataaatggggaaaaaacaaaaagaaagagaacgaaggtaaaaggacttaccgttcttttagataaagttgatggtt  
tcacatctctgtgaagccaacataacggagcgatccattcgtttgaaagacgattccataacaatgactcaattcattcctaaacctttctgtt  
tctttgatgatgaagcgaaccattggaaaaccgcttgcttacagtttaacgctattttggtaaacagacgctatgactcactatgtgcaatttct  
ttttttggcaggaatcatggattttccatagtagccttagaagaggcgaacacttgaacgttcagaaaatagagacgacgataatttag  
aaagaggaatttagtaggaactgttcagagaaagaagcctgaaaatagtagcaattttgccaaacttgcggaaatcatctgttatagccatt  
gatgaggaagggcgtaatgctttgattgtaaaacatgtccttatcaattccctatttcagctctgctttatagcagacacaggtttccacaaaaga  
aaattgacgatgtgctaggaggtgatgaagcatttgaatcgaaccaacaacagaagtggtcctgtgacaatagcaaatgtgacaataatcgtgc  
ttacttctccagcttcaaatcgaagtgtgatgagcaatgagtaacttctaccgttgaaccaagtcaaaattcaatggcgtgaaaactaaaaa

tggtttggattttacctaagtaataatggttatcggctgatccttgatataaaaaatgacttgaaggtggaattggccttttcttctttatt  
tccttttctgtttacatgggtattttctctgtataatatacaaatatgaatgataatattatgagtcctttgagttgataaaggaaaaacattact  
gcctatagacgaggtaggaggatttagtctatatcaaggtatatgtgatttctgcaacaatattctaataattacaaaaatcaaagtcaaacaa  
caatccaacggaatcggacgaaaaaaaaaagatttgggactgaggaggcttttctaagatctaataacatgaatagaacatttcaaaga  
atgcaactatcaagcacggtcataaagtctgattataagcgttccacatttgcagcttcatctgcacgggttcgcccggattcatcagtactca  
aatgctttaaaccgcttctccagtcactgacgtatctgagacgatttggcctgtaaccattcttctatactccaaaaatggtacagtgtagctg  
acgggtttaccgaaggatccatctgaaactgtcttggcgcccgttacggctatgatgcgcttctgcaacgcacatcaagccaaagtcaac  
aacctttatcaccaataacatagatacggccaatcgaatcctctctagccttcaattgttaagagctgtttgaaacgtagaaacatagtgaacgg  
attcatcaaaggacttgggcttctgacgtctgtaatcacgagtgaaagacatttgttttccaggatattcatattcattaaacatttgaagattgc  
ttagaacgatattgactccattttggaggctcgggacacgattttgaaataagttcttctccagatgattattgttctaccagatgatgcatac  
tagtgctgaggagacagtaagggaattgggtttgggtgtaggaataatgagatataatcttgaacgagtgccaatcttccggcgaaaaa  
aagtctataaagtcagctcggcttctacataagcaataggagagggtatgatgggcaccagggtggaataacacttgtgaatcctcacagat  
tcgaatcaaggtagtagacttctggggacaacacgttatcaacttcttagaaaatggagtgtagggcatttgcatttcttatatgagttctc  
catcgatagccaaggcagcagataatccactaaagaacatgccaaatcgaacggctttgaccgaaataatttggatttccggaagggtgaca  
aaggctcgaagattggctgccaatttctcctgagaaaaaccataatcccgtcaaaaggccatgctcgcgaatgtaggaagccaagtgctc  
gtatgaggcttgggtctaaagtttggaaactcctactcatcaatttccaccatcccaagtgatagaggaccctctaatgagcttcatcag  
agtaatcatttgacttctgattcgaagttcaatgggaccagtgagggaatagaactcgacatctgcgactaaacgttcgcgagtgacacgc  
attttaccgacaaaagggtaccgattcgcataaccatgcaggaaggacttaattttgtgaaaaattgaggccattgaaagggtatcgt  
ctgtaaagtgaagaaaagagcaaaaaaacacaggtcaggattcaagcgttaagttcagcttttcaaaagtgaggagaaaagtaagaaagcc  
ctttatagcatttagcacaaggcaaatgaacgcatggatggttcgatcttcccaacaagcttctgtctacacagcccaacttgggtctgtg  
acttgggttttggaaaatttgtattgttacttggaaactgaagtaacattatgcagctgtaaacaaaacaaattctacgaaaattcaaaaggt  
agagatgtctcaatgaaattataaactgaatataatcgatttgcactataaaagtcaaatcatgattcgttactacggtaataaaagtccgttct  
cttgggtataattctcagcatgctttatcaagtaatgcaagaaagcttttgataatatttcatcgttttctgatcgataattacttacaagtaaca  
acgaggttgcctcattttgaagatgagcacaacattattcatttttgattcccaattcccacgagcaggtcaggtatttccaagatccaagtg  
gatcgatcgatacgaatcaagcaatagtaaatgtatacttataggtatttctgaatgttatggttataaatttgcataaaaaggaaacttctcaa  
aaaaaagaagaaaagattcgtgtagtctcaagcataaaagtgctcaaatgattctgtagatgtaaatgtaattacatacataatttatat  
cacaacatttgacttcaaaatattagtaattatgagtcacgttatcacagttcagtttagtttagaggttttaagttatagcgtatcctt  
cacataaagaaagaaaatagattacatctacaaacagatataaatgtgtcaagcaaaatcgataagaataaacaacctcatctgctaccta  
tagatagacagtcggtttgttgaaaaagatcgccaaattctacattaatagttataagagaagtttccagtaattactttgatttgaagataaat  
aagaacagtaacttgcataagtaacatcgtaaatccagattttgagcaatcgttaactgattagttacttcaaaatttctttactcaaaggtcaa  
ttattattatctgattagcttagcggcccacttaatctgatggctcactgcgtgaagctctgcgagaagacatagaagcggcttgcagctgatgct  
gcttctttgcttccatagcagcctttctcagctgcaatcttgaacctatcacttgcagatcccaagctggataatatactgcaaggttctctt  
ttagaggaaagctgagtgagaatttgcagctggaccattatacacaatggatggggagcagcttctcatagaaaattggatttactataccag  
aattgtattgggataaggattccatgtagctattgcatctgaaattccaagaaccttcaattcaagggactggcaggacgattgagttaaagggg  
tcatgaaggtaaaaggactataaagtaataaacaccaaacatcaatgtaatgaaggctgctgtaacgaaagaaaaggctggacgggtgctcaa  
aatcacatttccaacgaatgccagcctacccaagtgcataatccgaagtacaaggctggaaggtatgatataaaaatacacgatccgtt  
tcaagaatataaggagcccagtgaaataaccaggcaagagcaaatgtccaatgttatacgaatgatgataaaacttaggaccacaatcgttgt  
atccatattccatcttgcagcgaaaaacaattaccaacgaaagaaaacaattagggacactacgctgtaccaaaacaactggattaccat  
gaagtaaacttggaggttctgatccgacataatctcaaaagctcctaacaagaaaggccatgtcaagcatggcttcaaatcatgtccatctcc  
cattttcggctcctcaaccacatcaacttgttctctatgaattttcaagaaaacttggcttctgtaattcgttttctagcatcagacggcatg  
gcatcgtggaatttactcaatgaccaagttgtacttctgctcaatacagtttgcagacatgtaacctcacgatggcttggccccagtcagga  
agacggcggtgagaagtcattaattcacagttagtaaacgtgaatcagctctaaaataagttataatgcttcaacgggtccgttggaaagaagc  
atgtcgagaaggacggcaagtttgtatacggataaataatttccatctccttgcgaaccaaagccaccgtaaccgaaactcaagctgcc  
aatcatgattgctcacaagaggtctgtgatcatgagaatgtaaagctctccctgcataaatggcgaagacgaacgatactaccatccttcaata  
attcaatttttgcggctattatcagcagcattctatgctcaatgatccaaagagtattctgattaggatgatcccaatgatattatttggttt  
ggtgccttccgggatacacgagttcgttgaatgcaagtaaccatgttcaggaattgcattgcggattgttaccaaagaacctatgctacatctgc  
atattcttccaaaatcgttaccctcaaagaatacttatactcaggggtcaaaaatgaatcataaatattagactttaggctaatttgaatga  
actgcgaatataccaagtacacaacctaggaactcctataagatagaatgtgtagttaaaccataacgaataatacagagtaataggaacag



taaggtcaccaatcaaattccaagatggaaaagtgcacaaaccaatccaaaatagtgtaaacagtcctgaaagtttgtgctaattgtaagg  
ccaagactgatacccgtatataagaaggctgatatgccatttttagggcaaaaggatattttgttggtttcatagtacatccagaaaaagaagtt  
aagcccataaaaaataaagtagggatttcaatcattacataacggctcattgtaataatccattgtcaagatagcaaaaacagaagccatga  
aggcagccatttttgagttgaggaaagatacacattaccatacattaaagggatcaatagagaaccaaatgcagcgatgatgaggcgaagag  
atctcgcagtttcgaaagaagggaattcctgtcctggatgacttcttctgaagatcaggattggagttcataaatgtagacaaagctcaata  
atagctttccaagaggaggataaacatccattacaaattttttgatgcatagtaacggcataaattcagctatcttaactcttcaaataccacctt  
agaaggattcattaaacgttgactcgaacagcgaaagcaacaactgagagtaacaaaaaattccaaaatccctagatgtaagaactttcta  
ggccgcgaaagctccacatcacgaatattctttctgctttcgtctgcaaaagcagacgggtcgacttgccattttatgcaaatagcctcaa  
tcaacgctgtatttacgcaatattcctttgatattatgctaagagagagaacaaagggtgcatataaatactatgacaagactaaaaagt  
aagtgtgtgtagtataatactcatagctgagcaaatccatgtaccaagtaacattaagttgctacttctagttgatcttagaaaaatacaagaa  
tgttacaaaattctatgattgttcattatattcattgtcaaggcattataaaaaataaatagtcattcggtatcatcaaatatctggttcgtttt  
atctaagccaatgcaatgtttttatcttcaatttttagtagatacaaaaaattccacctctataccctctatttactcaattttttgaattgcaaca  
gctatttctcgtgaagtcaaaaacgaaatgtgttgactaaaaatagtagtcaccggatgcaattgtgtacatctaccagataactaa  
acatatgtgaataatagattcctcataactctcagtcagacatattaacttacaatagaggggatttggcaaaaatgcaatcggtagca  
ttggctcagtaattaaagaccaagtaacatcaactgaaaagcagatttccactaaattcgttagcaacaagaaactgactctgaaataccttgc  
tggtttttggtggccgtaattcgggtggggaagactaaaaatcaaaatagcgcctaaagttttggagacgggagagctagatagcgaagaaa  
gctgacctggacacaagtaaaactcttccaattattaaaccagctaatagtctgcaaatgtcaataaaaaagcaacgaagctaagaaca  
taccaggcattgagttttggtatgctaaacaaagagttaaacatgtcattaatgtttgtcagcaagtggtatccaaaatagtagcacaactcc  
gcaactgaaatttttagcaagatacccatcccaaatcggtaaaccagcatacaaaaacaaacagcagcgtttggcgtagttattcac  
ataaagaacgcaatcagtgagctgagaaaagccttgacaaggtcagcatgttaggcaatgtaaatacattctcacgaatgggcaactgaaa  
gccctttagttcattacgtttttctgctttggttggtgactggacgaattatggaagccagaaatctccattgtcttcaattttggaccagg  
cacgtgccgggatagagccatcgatgcttcccaacgttttttagcaacatgttttagcagggtatttgaactgttatcggcgccctggaaaat  
acctgtacgaaccaagatgctgtccatccatagggcgttgctccacgaatcactttcaggattatcgccaacataaaaatttcttggggga  
gttgggaatactaaagcttttctgtttgcttcaaggatgttggttcataatcataagtaaccttatgtggttttcatactttgtcaatttcatttgc  
ttcctgtaagctcattataaatctttcacaacaagaagcaaatgcgctgtccaatcgaggaagtggttattcattggcacaaccagatccg  
agctaaaaggtaataatattagaagtaaaaaactgaaatcacatgttggtctttgggagcttactttgaataataaatgtcaggtccttctgctg  
ccctttcagatacagtagctagaattcattttctgattgagcaattccataacaagttgcaaatcaagtccaaatctcactggatcgacataag  
taaatacagcctcaataggttggtcaggtcgaaatcgcgagcctgttcaaatcgtttctgtaaaagaagtaaagggccaaaagggagtagca  
cgcttagcattacatcgagttcattataacgcttgaaagccatacatctcagctgtcttctgtagcgtgtcatcacttctccgagaacgagat  
atgcttatacttatttaagattctgaacggagtagcagactgacaaaagtcacttctcaagttcacttgcaaaaggttggaacagcgttca  
gcccgctgctttcatgattccacctccattctgtagcaaaatgaacggaatgttatgctttgaagataacgtaaaactaacaggtagcaaaaa  
aataaataatattggcattaggaaggaagcacaactgttttcttctgtcaagcccttctcctcgaataaggacacatcaatactttacggc  
gttagctttcaattctttagacacaaaaaactatttactcaaatgcaaaagctacatcagcagctcagctccagcaaccggcattctgttgtt  
aaacgacgaactgcaataatgtttcgttgatgagcagcagcctgccagatctatgattaatggcagcaaacatgaagaagttggttaaaata  
tccagaaatagatttaattcccagattttactgtaaatctctctcagtagtggtttttagtgttagtgaacggggccgttcacgggtatacat  
aatttcacatagataatagtaactcattcatattgctagtcagaaatttacagacaaaaggattggaagctgaaagaagagaattaaaa  
tgaattatctaaatatctttgtttatgaaaacattgaaagccggtctttgctacttctcaaaagttcgctattcatggatacaacatgttctgtt  
ataacaaataatctttatggtaaacaaaatagctaaagcagaatgtatactatgagcaggatacaaaagttagattgataaaaaggagtcgg  
tagtattatacaagtaatagctcagcgtcataaactataaatacattttgtaattaattttagaagactcagcagctttatttggaggagagat  
agcaccaaaaggaactttgttagctgcagcttcttctgttcaacttctcgggagtgatctcgatgccgttgtgtacgtcaaaaatcagttcgg  
tactgactaatcgtttcatattgtctgcaactgcaacgttttccaaattaagtgtagatcttctgacttcaattttcggctgttcacgccagcggg  
ggtcaacaagtgacgcgcatatgttctccatttcatttctggaatcatctaccgtaaaccgactgcgctcacaaggtacatggcgtgga  
atgcttgggtacagatttggcgggtttgaagcaggtatgggctgagtagatgcaggtgacccataggtgaaggttgcactgcaggtgag  
ggagaggtttctgcagacgtctttgtgaaggtacagacgaaggcattgcaacgcaaacctgctttggcaggtgattcaaaaggttccatgg  
agctgaagtagggggagcttctcaattgtgtaattcatatcaggcatagtaaacattgcagactttgttctaagtagcgggtttgcaaatcagcc  
agattttaggtttgaaagtttggtgtttcatctgctcagtaattgaatgacttactaccgcaaatcgttccagtcattctggcattatc  
aatctttccctctcaattcttctgttttccctttgggtctcttgatacttctccactctaccctaggctgaattcgctgaagaacgctgtagg  
gatcctggatgtttgacgaagcaaaaggttcaaaaggtggaaggtattctttacaaagaggaatattgtgtactatgacgataaagtaagaa

taaagtgcagatgatttgggtgcaagaaatcaaactgagtattccccattcttttgtgaaagttagcaatgaatgagggcctcgaattgctgcgtagcgagctgtgagtcgaagaacgtttaaactctgtgctgatataagaaggcaagggtctgaaaacaaatacggaggaggagcgggagggggcagtttgaatggatttgtgataggacgagccaagttagcagctccctgtccgggtccagaagtagcttttagtttcttctgctggcttctccagcttgtgctgatagacttgaataaggatcgtccactttagaanaagcaaatgttggattctctgctcattttgtctgatcttttctcaaacgcccggccattttagcaacatagccagcggatttgaatgatttctgaatttctggcggaggagaattacattggtaggaagaccaagacacatcttcttgtatcattttgattagatggagacaatccagggtggaactcattgccacgacaaaaatggtaaatgctagattttatgcaatctaagacagaaaccaaacccaagcccaagaaatgttctattaatttatataactaaacacaagccaaataaatgataagttcgcgaacaatatcgtcttaagaagcaagtggacgcgtggaatggctctgttagttgaatatcagaggtcaatactttacgacgaagttagatgaatttgccttttagagagtttccaataaaataaaaaaaaagtttatttaaagcatccctcggacaaaaagaaggagtagcgttttctgactttttcgcgaagtaacgaaaccttttcttttcaaaaacccgcttcttcacataaaccccgaagcgtgttttaacatgcatttaaatagacgtcaattaagaacctccataaatacaatatacggcgttgataattctttattgtctcggcatgttgaagccatactggtaggagccagttgctcaaaaataatccattgtccatggcgttaagttgaattagtaaggaatgaaaaactaacatctctgtaatagtcgaattgattaccttgacgggattgggtttgttgcctggaatgtcaaacatgctgtatacaaatatggatagcggattggacgcgtttcctggctgggtgtagcctctgggctattggtcatttttataccaaagttttagccattgatggttctcaggcagccgtaccaatagttcctctccacttggccaactgttgatcatggtgctgatgccatcaacacgagcttggagtttggtaaccacagaattactcaactaaatctccaatgtccatccttactcagtgctagctgttttattttatacttctacttgggaagaaatacacacgggcatcctgtatttcttacgtatctggtccagtcgaaggaaatttgttggtttggattgtatgcttactgctatactggtgatgttttggacaaggcttctcctacccagagctcttggttcctcgttcttttagctccttactatacgtatggcttctgtcttttaagcttttaggcgttggctttttcgaatgttttcagagcatttggaaatgcattgcgttgaaaaaacaacagaagtcgcttgaaggccttgcctggactttctcttattctgtacaatggactgccttcttttctttatgtgaaataccctactttttgaagagcaatttgcactattttatttaaacgcgatcatcttgcctattctgtcgggtgcattattgtctctcatgtcacagaatcatccttcccttactggaatgtttgattctccttttggtaaatgccttggacgctatacgttccggaattttaaaaaactataaaaaggaatacatatttgcgtactcggtttggactaggtatctatggcaacttgttggccatattgtatcatctatcacggaggagtagggatttattgcttacactcgtcctaagccagaagaaaaaataatgtatcctttataattccctaaagctggaatttttattcggctattttacctttatttttctcgttctgttaggtgacttaccacgtaaaaagatttataaacctattaaattacgtctttatctgaaatcattcttcatcttcatccatacatccatctaggctagaactaacaacaaatcaatgaatatgaacaaactctgtaccgattgtcttcaacttgatctctgtgagttatgcttgtgaagccttgggtttgtagaaggactacttattgacctttgtttacattacattacgtcaaaaagaaacaaaattagagttcatagttagggttgcgttcaatgaagttgcaggggttcaagagaggggtgctcctaaagtttatttggagaaaatctgagcctctgagaacattctcttttctgttttaagattaaagcttgaacaaatcaaagtcgcaaaggttttaaagttgtttaacggcgttctactgggactctgctatttgcgtttatcaaaagcttacaataagttttgaaagcatactttgcattggttatgtcacctccataattaacgctattcgcgtcagccgttattcgcacttgtgcttgttttacttataaaaaattgttttattcgtataaatatttaaaccggttgcacatccattccgttcaaaaataagcttttggtagggtaataaggacattacataattgatgggtcaatgaggttgcattatataaacagaccgactctcattttaagattacacacaaccacttttagtactacagcgcgttattctatctacacaaaaaaattaccaaaaacccccaaaaaaatctacattccttttcttatttctctatcttttggattaatatcaatcttttagtatcttctcatttatttttggaaaaataattcattttaaaatggacaaaacatttataacgacctgaaacttgggtgtcagggcctcaaatccttgacttcttgaacaagacacttagttcacgaagaaagaaaattcgtttattaccagattataataagaaaaacgtgagtgatttctggcgggggtcggggcagcaaccaccactcgtcgtttgtggcaaggggatgctcacggcgtatttctggtctattttgctcccctcgtctaaacaataatgcccgtatcaacaagtcagtcggaagccggtacttggtaatttcaaaaattataccggtgacgttccacttgcgatggcgtggaagaaagagagctgctggaagaaaggctgaaataattgcccgtgggtgatgatgtctctgtagccgtccaagagtggaaggtcggctcgtcggactctggtactgttcttgttacaagttggctggcgtcctcccgggttctttagaaactctgttaagcttgcgtactgtaacgataatggtcagttattggtccttattggccatgtccatgttctggacaaagtctcgttctgaagatgaaagcatggccacaatgaaatggaacttggtatgggtatccaatgaacctggttgcgtcgtatgtcctataacctgtattgatctgtttctgaaatgttaaaacaactttggaccaatctgataaggatcgtgcttacgtaaaatgacggtaaagacaggtggttttacttataaataaccttggctgtccttacttgaattcagtgctatttctagtaaagtcaggaggctcttggcaagcaatattctattcatccagctcgtttatgctgggattttaccactagttgaacggcttggtttggatcacctgttccgtacgactgacggtaaacattggtggcaagaatttcttcttagatcgtcgtatcaaccgctcagggctcctggcttctgtcaacctgtagcctgaatctaagaacaagattggaacatcagcatagaggaagctcatagtgatattcaatctcctgtgaaaatcgacaaggaagcagttcgaagattatccttacagcatgcagaatttgattgatcgaacccagatcaccagattcgatacaattgcaggcgtggcattgcccaccacattgaaagcggggcgcgaaggtgcgcaaatgtcaaatctgacaaatttgtgacgaccaattcgtctcgttgatctgcagacgtcattgaaacaatatggatggtaccttggcgccttgcataatttccatggcttccaagggagtgaggaccacctacaggaaaagaaggatgttcacgaagatgtggtccagagctgaaggctgctatggacacactattcaagtatactcgtcgtcctggtgacctgacctgctgctctt

gttcatttgtgaaaatgttgaaccgacaatgtcaagactgctgtaagactgctcgtgagggcgctgacaataccgcaaatttacaggcc  
aagcttgctgctgtttatgtggcggtgatgtgaaggtcccgatgctggtgctcttggtgtgccgcaatcgtagaaggcttcgccaataag  
caagcaatattgtagccgttattgttatattttattattatttagatgttcatatatatagtttagacaaattctagtttatgtagataagatat  
aatactttcaatgaaatacttatagatagaattggtttctacagtctattgtctttgagcgaatttaaaacaaaaaattattctttaaagtaggtaa  
gtaggacatttggaaaacatgagaattgaacaattgtattcatcaccatttatgttactgtacaatgaacgctcttttcggaatctagttagaggt  
taaagatttttaccatagactttactaactgaaccggtcatcatcgtccaaaaattcagacttttaagcaattggaatcaaaatagtagcgg  
gattgttcagagtgaaccacacacgtccattcattccaacagcaatttcaaaaggaacataggtaccgagagtttgcaaaagtgcgttttagg  
ggttaagaggttctacaatgagataaagataaccagtgatcatatagccatcttcaattctcaaagccaccagctttccagttgtgcatct  
acgcattccagctctggttccatcgcggtcagccaaagatacgcgagcataaactaggcttccgactgctaggtttggctgttttcttagtaa  
cgttctcaaaagcaatgcgttcaattgagcactgtgtgctgatccaatatccaccggtaaccctcagcaaatcgggaagtaacttgccaatga  
cctgatcattcatagcaggaacatacattgagttagcatggaatcaaaaaattaaagtaaaataagtaacattggcgcccgcttgcctt  
gtcttgcttcttcatgaacgttcacagccataatgttcgctcgtctggtataaaatTTTTTTTacttactctttcattctagtgtccactaaac  
agtattttggctccctgatgcagaaagccagcgcgagataccttaatttcatcttctggtcgtgttttgatgaactaagccagggcctagtgcga  
cagttccttgcctgctgactgtagacagctttacattgtctctggaaagtagtatacaggaccgactcttccattctgacatgttgaattcca  
gattcttctcagctgtttaccttgactcaacataccgttgacgcagcactatcatttcaaacgtaactataactgaaagtaagcaacatc  
ttcctaaaaggttcaatgcatccatcgcactgttttatttctgaaagtctactagcagctatctttgactacgttattggatactatggcacat  
ctcctattgacatgaaccattataacatatgtctgaatggcggggaatcagtaactcttccatcagaaggactcacatgactgtggatgatga  
tttaatgacagtcgctcaatacagtggtcgtatccaccattctatggacatccatgctgattccgctctccttattgactacaatgctacgtgc  
acggctacgacacctgaaggagacgaaattgacgtctctgaaatggatcagcaagattgggacattatggttaaggctccctactatgact  
atgggttggtttacttgggtgcaatgggtgcttttggcctcttctgcttttggctgcatcttccatcttctgtttaaattacctggaatccattct  
atcttcccgctggggcactcgcattccaagttggatattgggtgctgctatataatccatgttctttagtcttacaacaccgaggtgctg  
acaagaccgcttaatagcttagaatgttttagtagatcagatgccttagttggagaagaggatggagcggcttggctggtgtgctgacctcgc  
ctatgcatgtaaactgcaacgatacgaagcggcaaacgcgaagtaaagattctacaggaaccaaatgcatttttcggttaatttctttt  
tctactatcccctaatgaccaattatttcatgaaatatttacaagggtcggacgaatcgtgggctgtcaactcaataatttctgtaggaagct  
aggtttcttttaataattcgtactatttctttatacatatattcatcagatggacaagtagaaactaatggcttctcctcaaatggataattct  
tgacaaaactcatcaaggcattcattaatagatatagatagccagaacgttggagaataagagtttagtaacaacgaaaaaaagaaaa  
agtaattatcactttagtaaacacgaatctactccaatcgtcgtcatcatcattcaggattattcttattaggcttctgttcttttgcctg  
gttcggagctcttggcttcttttactaggatgctcagaagaagggtccaactcagtgctcttcttgcctttccctcgaaacaagctcgttttg  
gatcttctgaaacatcccattgcttctgcttctgatttttgccttctccatcactttttcatcatccaactaaagatttcttcttct  
cattatgaatagaactcatagattcgttggctcgatttcttctgtacaaaaaacggttccaaatgcatcgtagaacttgagacggcac  
taattgttccatctgattacgcaaacctgaatacgttgaagaagatctgaaatctcatctgcttctatcgtcaatggaacaccttttccagcttc  
gtaggctcatcagacacaggcttccgaaaaaggctggtgttttcaataagttgcaggattgttttctggcggcttaggctaagaaggttagc  
actactgtattgaaataatgtaataattgagatttccatccccattatgaaagatggttttgagccacagaccgcaaacgccgagattaa  
ttaactactataaattgcacgagaagactggatctggttagtcttattcttctccttggcgtaatgtacaacgcttgcgcaaaatcca  
ttgactgttgcgaaggctactccagtaatgaccgctgactgttccactttgcgaatattctccagggtagcatttgaagaatttccatctcaaa  
ttgtgctttagattactcctctgtattcgcgctcttctgtattatctattaaacctcgtcttctatgttaagtttagccagttccctcaattat  
ctgcataccttttcttaatttactccaaaaggaccgaatttctcagtttaaggactgttattgtcagttcgaacgttgacgtttgcaata  
tgaagacatacgtccaatgcagagcccatttcttctttaaatttcaatataccttctcattttggcttctgttataacattaggactcatataatcgt  
aaagatccatctcttctttagtaattggttcagtttctgctgcttctgcataaagtagcattcaatgcaattgctgtcagggggcggtgta  
gggtcgatacaagttgcttaaatgtagaattaaaaagaacaatcgtttcaacataaatgaaccaataaactcatatttctactttctaaggtta  
cctacgtctttcacaaaactgcttcatgaatataatgaaaatacaggctcacatattataaaagataaaagaatgtatttttaattag  
agactaaatacttcatgctaataacaaaggaatgaattgtatacacgatttccgacttagactgggttctagacgattcacaactcaaaagac  
gttagctaaattatacgtactattcgaagataactcagcaccagtttaactggcaaaaagtacatcaaccaagtaacggcttccaagggtg  
atcgttcagaaaaggaataacatgactgatattaattacggacggacagtaattcagttatccagcttcaaaaaaataagagaatgaatgc  
tgtagttaaactcattaaaaaataactgatttaatacaatatttctagaaaaacattataaaatttgcgaaaccttaattctttaaagattt  
agtgtcatatttagtcatgaaaattttgaacgatgaatccacatcaaatTTTTTaaagttcatcagcatcaaaagctcctcatcttctcgcgacg  
gccagctcctcagagtaaagcttttagtgataggatgaacgacgggtgcaacctttggcgttgatcatcaatttctccttagatgcatcagca  
ccttcaacctcaagcattcaataacatcctcaacggcgtccaaaacagcttgcttgcctcatcgttaaccttgccaccaactgttctttagt

gaactgggtcttcaagccgtaaacgtagtttcaagaccattacgagcttcaatacgctccttcaacatcttgcctcttcggaatattgctcggctt  
ctttaaccatacgctgatgtcttctcggacaaacgaccttatcattcttgataacaagtttctcagccttgccttaccagacttgcgacggca  
gaaacggtcaaacaccgtagcatcaactcaaaggttaactcaatttggggaacgccacgtggagcgggaggataaccacgcaagtcaaatt  
taccaagtaggttgttgccttggtcatcgtacgttcaccttcaatacttgaaatcaaaaacgggtattctggttgcacttgcggtagagaaaattga  
gacttacgagtggaatgggagagttacgacggataagttgagtcataacaccgccggtagtttgcgatacccaagttaaggggataacatcca  
aaagtacaatgttatcacttccctctcggcagacaaaaccagcttgaacagcggcaccgtaagccacagcctcatcggggtaaatgcctta  
gaagccttcttagtgaagaagtctccaaaagttcttgaaccttaggaatacagtagaaccgcccagcagtagacaatgtcatcaactcagattc  
ttgagtcagaatccttcaaaacttgtcaacgggcttcaaggttcttgaagaggtccatgttcaattcttcaacttggcacgagacaaaagttc  
agagaagtcttaccatcgtaaaaggaatcgtttcaatacagccgacttttgaagaacaaagtagccttctcagcctcgcgcttaag  
tttaccatggacttggcgtccttagtaacgtcaacattgttcttacggttatacaagcgagccaagtagttgatgaccttgttcaagttcac  
cacaaggtgagtgaccagaagtgccaaaacttcaaatcaccggttgaatggacaaaagagaaacatacaaggtaccaccactaagt  
cataaacaataatgtttttaccatcagttctgtccaaaccgtaggcaatagctcggcagtaggtcgttgacaatacggataacattaagac  
cagcaatagtagcggcatccttagtggtgacgttgagcgtattgaagtaggcgggaacggttacaacagcgtgggtgacgggtgaccaag  
gtaagttttagcgggttgcctcatcttacaagaatcatggcagaaatctttaggagtgaaatccttcttaccaccgtaggtaactcaacga  
gaggacggttattcttattgataatgtgaaaggaagagattgacatcttagtcatagcttctcgtcaaacttacgaccaataaggcgttaat  
gtcgaatacgtgtttcgggattggcaggagcctggttcttagcggcctcaccaaccaaacttcttcatcagtaaaaccaacataagaaggag  
taatacggctaccttgatcattggcaataattcgcacgacacattcttataacagccacacaggagtaagtagtacaagatcaataccgatg  
acagttccatagtttctggttctttctcagaattggcaaaaaccaaaggcaaaaaacaaacagagctatgaaatagctgaaatgctgaa  
gagctgaaactcctcatttgaagaatgattcagcctataaattgaagaatcttttttcttaacaagaccaataataagacttgatttttt  
aaaaaagtgaacagttaattagtgagtaattactcgcacactttaaagcttaattggtatataatctatctggagaaatcggtgttgggttggg  
taagtttatagactagttaaaacaccgctaagtaacatagagagcagtcacattgtcgttactagtagtctccagaacaaatcttctataga  
gaaataacataaagcagtgcaacgaattgattcgttcttaactttattgaaaagaggtaaacaaaacaatgctctgcagcaaaaaagaag  
taagtcataatcacggaagaggctcgttcatgatttacttccaaaggggaagccatagtatcataattgggttacagcatacagtgccagaa  
gcaataatattcacatagaaatgattggagtaatttttaagaacgataccctcttcatgctgtagaatacttttttagtaccattgatattcttca  
tgatattttattgttctagttcaaacatttcaatccttgtagtccatgttgggttgcgggtgaaatcagataaaaaacaaactcataaaat  
gtacaaggtagagacgaaaacaaataagcatagttctatcttctacgatagttgagtgagcgttttcaattccactattatgaatgtgcat  
ttcatttcgaccatcaaatgtcatatataactaaacaaacaaacaaacaaacaaacagagcaaacgagcggtcataactctctagtagtctat  
atctttcatacattttttatgtgatagatcaattgggtttggttaggatttgataatcaaaggggaaccgaaaacatccttgtaacaaatgg  
tccaaagaagaactcgtaatcttcttcttcttctgtttattggatgaagaagaagaatcttcttcttctacgttagtataa  
agtaatattggggaatcaacgaaacactcgtatttccgttaataactcttaagcttcttactgctgaccagttccataatgctggcaaatcc  
attagagaggtaaaagagcagcagagacatcgtattggacgaattgatattttactaacaagaattagttgatggtaaggcgttttggtta  
ttggtgacaagtccttagcatttgaaggaagaatacaagactccttactaactccgataactcgccttgcctatcaattccagttccta  
atgatgaaatcctgcgaattcgtctacctataagcaagttgtgataatgtcttggcgaagtgactcgtcaacatccctgggcttgaacgaa  
acttgtgcaaacgagaccaatataaaacgtcgtggttaaaactggactttgaaatgaaatgctacttgggatgaggccaaagaatggattcg  
tgaacgtgctggccaacccaacagtcacaatcgtgttgactcttaagtagccttttggtagaaccttctcctcatccactgaaacagaa  
tattacataaacattaattctgtcgtgaggagattggatattgtttgcaatgaaggtggtgctgatgttggtgatgaaaggctaaaa  
agctttgattcctgtacttctcagaaatcttctcgtagtgaaatgctacttcttcttcaaatgtcccaggaacaacatgcttccctgtt  
gatttcattatcgtctatactcagttatgttgactgcaattacatactggagatcaatccttgggttattctactggtccggtagcagatg  
ttactatttagatcttgcgaagcttgacaaaactgccgagttgaaatgagggtgactaagtgaggcagttgctgcacagctgaagcattaggcatc  
aaaactgaaaaggaagattcgaaccgattacagctgattatggtcctccatggccttctcgtcctcattggtcgtgacttgagcaagaagaa  
gctcatgttcaagagcttgatgccaagacaggtgcttccctcaagttgaccataatgaacccaatggtcgtgttgaaccttgtgctggaggtg  
gtcctcagtggtatagctgatgcagttgctgtgaacgggtgctgcagatgaattagtaactacggtgaatacagtgaggctcctacggatggac  
aaacatagtagatgccaagacagcttggacttgatgactcgtggcaaacctcatcccaggggcaaaagccttttcatgttgggtggtattgcta  
acttactcgcctgctgaacattcgtgcaatttctcagctttaggcaattcaagacaagttgcatgaacataaagtctctatagggtcgt  
cgtgctggcccaatcaggaaggtcctcgtgtaattcgtgaggccggcgaagcacaacctaactgaaagtgtatggaccagaatgcca  
cattagtggtattgtccctatgggattgggcaaggtacctgtggagccagaatggcagatggcctaaaaaccttgaacgtatgatttcgcaatgt  
atggctagtagagactgttgttcaaatctatgtatgttttggataaaatcgtttcctttaaagtaattgatgctaaatagaaggaatag  
tagatatttcaaatgttgaataaataagaatagtagtatttactgttttcaactaaacggcataaaaaataataataatagattatcaa

ttaagagatgctatccataagaagtgcactttttctgaataatcttcaggtttgatagttattatcgcatattcatcatcaataataaataatcgcc  
tgcattgtgaacaaaggaatcaaaaatgtaacggaacaaagatggaaagatgggttgtagtaataacctataaacgttctttcttggtctcgt  
gttttaaatggcagtgtaaccaccgtcgacgataaggtccaagccagacacataactggcagcatcactagccaaaaatacatagccaccggtc  
aattctttagggtaacgatacggcgggaaggaacgtagggaaaccattcatcgtgcatccaccggctcatgctagttgaaatatagccaggaga  
aacacagttaacacgggcgaaaggagcccactctacgcaaacctttacaagaatgaatcacaccagccttggaaagcgttgtaagcgattgc  
ttctgaggacgttgcaatggtacgtgacatagaagcagtagcaataaagctacaaaaccttgccttcaagacaggaccagttacgtgtcc  
aatggtgaagataccgtaagattgatgtaatttccttagcaaacctcatcaggagtcactcagcggctgattgttggtacaaacaccggcattt  
gagcagcagatgcaatatgacaaaacttttcagagcctggcacaagacactcctaatacgttggaatcgtaacgttgcaatgaagtcactg  
cctcaacacatgctttgagcaatctcttggttggtctcggcatttagttctattgtagtaataactacactagccccagctcggcataagctt  
cagcaacgtccaagcggatacccttagaacatcgtaaagaagggcctttttctttaaagctcaaaagatcaacgacagttctctgtaattgtt  
cttagcaggaggactcattttggttctaattggtggatgaaagttttcaaaaaaaatataaaatactgccgattatgagcaaatgggcgactat  
ttatatcttttttcatcgaatattcatgatgatgatgatgatggtgagaatgatggtgaaggaatgatggtatgacgaatgatcatt  
caaacgatgattcacttttgatttccagttttatcatagtttctggtgactactacagtgacttctacgataatctcatataaaagtcggtttt  
ctcgaatctgttgaggagtacaaacacttacagcaaacattttgagtgctacactagttaaggcgtaacgaagaataataaatcgaagaatt  
aatcaaaagaaaaacaggcaagaattatgactggtggtgacttatagatgtaattcttttgattgtttactacatttgcgacctgtaagtaa  
ccgatgctactatgagtcgctttttataacatcgttaactcgagtagaaaaatggccaatttaaaaatttccgaattggaagcattttcttac  
atcaaaacaaatggtcgggtgctatttgaggtgaaatcatcgctatcatgatgtaagtaaacacaagtaatatgaataactaccaagcaatac  
agtttcttagaagtagctttctgagaatatcttgttctggtatcgttcaaattgacttttctgctactgctctctattcattgtccttccattt  
tcccttctttatgttaccacatatctaccatgggaatatcactcccaagatgattataacttaagtagaataaatccactttttgaaatcaatac  
taagccagatatacttgaattacttacttacgataagattaaggtatgtatagtaatgtccaagcctgtaaaactagctaggagatacaaagac  
tggcaaatgtgggctctattttctttgatgaaaaatacccacttaaccactcatcctggtaccagttgtctcctcaaaaactccaagttg  
tcttgatcataactccccatataatttttattcacttctctgggttttctgcatagcactagtgatattaccgaaatcaatacacaggatgtccctg  
ttcagcaaatattcacgcatcccgatcattgttatggctggagagcgaagaaagcagcagataaggagcattctgtgtaacaggatgctcgttg  
aattacaaccatttgggcttaggaagataatttaccgaattattctaattcttttgggctgtaacaacgaagataatttccaaaatattgtttttt  
caactactgttagagtaaggtgcaacgaatgatcgattcatattgtctcaatcgtcggcggactgaggttatgtgatgacttacgtattcttc  
catttggctggaacaaagacacgttctctatctgaatatatgaaacagccttttttgaatatattaatatttacttcaaggctgatgagc  
ttgcaagcaataaacaaggccatcttagtagaacattccacgacggcacaataacctccttgcttgaataatggaatcctatgatgaaactc  
ataaagaaattcttcaaggttattctggtactgatgatatttcaaaaatctcagaccatagatctttctgtattatgctgttgcaaatatcgca  
attttttcataactttgaaatgctgaccgcatgccattccaataaaactttcattttcaattcagtgagctttgtgcaaaaatgcttctcgaagg  
ggtcggctgatgatacatctgactaactgctgaattttgagatgagaatctgctcctgattgtgtttatgagaagcccgtcctactgagattg  
ggaattagactgtcctcatagatctcgaatctctgtgtgctgatttcaattctcaataatccacgatgctctctacatgatcaactctg  
ttgctagatgattcagaaaatggtgctggttctcgtttaggtcgacaataggagtcaaaaatataacaatccagctctgaagtcacactgttca  
tttttaaacgagcatctgtcggattctagatattaagtcctcatggttagtcaaaatagaaaaggttatctaggtctgaaagcaagtgggcca  
tttctaagagctgtataattgcataggtctcctttccaagttggccaagttcgttgttgcctgtaagtgatgctgaatggaatacaaccggatg  
atatattccatcgtctgtttttgagacacgacagctcctatagcatggtcaaaaacatcgttttctaactagtttcttagttcggctgctgatgctg  
agaatagaagaatttcaaatgcttctgatctgcataaaagcttgttgtgccgatctgtccattcatatttagcatccttttaataagtcatac  
aaaggtctagataatttgaagttcggcacaattgcctagaataattaacaaaacctaagaatgatcttagcttttaaaaggtcaggtacc  
ggccagctataatggcctgaattcttccggatcgacttccattccttttctgaaatagatggcctaagaatttaacctgttctgaaaaaaca  
acatttctctgatccagatataagtcagcttccctaatcttctaataatttctcgcacatggttctggtgttcttcttgaagaagaataaataag  
atggtgccaataaacgataataaaaacccaagaacggcaataacgcttgttgatacatctgaaaatgtgccggagcattggttaatcc  
caacggtatgacatatactgtaaacctcaaatggggttttaaaagcagcttctgctcgtcacctttcttattctgagcagttgataggatcctt  
tataagtaacgttgtaaagactctagctccgctaaatgtctaataaattgttctaattattcaatggataattatctcgttgttattacattca  
aggcttataattgattaccattctgtactcatctgtccctttttggaataatagaggagtgacataaaactggaggaactttcacggattttcc  
ttgatttaataattctgcatctcttctcatgatagttcccttttataatagtaataatttgggtgactttggttaattccttgtcaattta  
atctctaagtcattttctgagtggttaggtactttcggaggtcctcgaatagttggaaaatggttttaataagattcctgttttctgttgttctca  
ttttcttatccatctgcatcattcgaactccttcttagacatctcactcatctgtttaaatttgggtgaacgtagctagcaatctgtggtcgaag  
tctatattcgaataaactcaagtcctgtttctatttcaaatcagctatcccactccgtcaggaagatattatccaggaataaaaaccaagaatttg  
aagaaactcgaatggagtaagcagcggtaattttctattaagtaagaattcaattgatgctctagcttactttagtaggaatggtgcaatccg

cttagtggcgagatttatagtaacatTTTTatagctcaatgccacggtagaaatctcacacatataataatgtaatacaaccgaataagcaatt  
gtatcgttttattaatgaatggaattagggtgtactttgtgtatagaagctattaatgtccagtcgaatctccaatttgctgagttcaagtgtgaag  
ctgaaaaggtttatatacctttgcagatatggccaacgctatgtagctctttgtggctgatagttctttgtctgaaaagctccgtccgaaaggtg  
ctattacgtttaaactggtcatgaatatctcatcctttactctgatggatttgcataaactcggaatatccttatatcataatgtactgtaatatat  
aatattaacaaaacacctctcatgacaatgacaggttccaatttatgcaactaattttatcgactttgttctgctcactatctggaataacaggcg  
gtcccttagagtaagctaaatgtcgctaaacattctgaaagtcaattcattctccagtggggtcaaaaaattgctgctaataagggtttaccta  
catttgaagctTTTTTTTTTctctttccaaaaaataaccacacttaattcgttgcatactctctttattggaacttgaaattggaccgctttcg  
cgtgttgatcttctgtagtttaagtcatttcaaaataaaggccctctgtttactttttttgttcttactctgatttcttactcgcattgtatt  
tctccattcgaactatttgatattatcataacatgtctgctcaaaaccgatgataaagcttgccttggatattgatgtcgtttttttccc  
ttaaatacgttgatgtaattgtttttcaggagtaaccgttactccataggcccttctgtcgatagtgaaaccttaacaaaactact  
agtatggattttgtcaatatggtattcaactaacatctctgcagatcatttactggaaacttggcaagggtccgctcctctccattaaggc  
tcaaatgatgggtaagcagtttcaagcagatggcttgcctggtcatggtcgttagtcctatttcttcttaccctgtccaggctgctccggggaa  
aaagctgctgaagttgtaacaactggccaagatccccatgacaaaccaagaattgttgacgagcagcaagcattcgtgtacgcatctgttt  
ctttctaccttctaaactaatccccattacaggccaaatttggccttccatgacctgttaccaggagctgaagcttctccagttttaaacac  
aagaacatcgatatggcagtaagtactctTTTTTTTTTcttgcacgagccttcaaccttccatgactaacctatttcttatttagttagctacc  
tctccaataaccgcaactatcaaatgaaaaccaactcttctgcatccttgcacaaattcggcgacaatgttattactggtgatgacctcgca  
ttcctcctaaccgtggaaagccccaccctgacatctggcttcaagctctaaacttaattaatcaaaaccgtagaaagagaaatctcccgcattgt  
ctcctagcgattgcattgcttgcgaagacagcgttctggcgtaaagagtgcaaaaggcccggtatgcatgtcattgggttccgatactgcat  
tctcaatcttttctgcatcaataaaagaactgttgatgatcagtgtaattttatagatttagaagatttccagcagagaaattcttttggg  
tgcttgaacaaaatattaccataatctatatctatacatgtgaaaaaagtgaaggtcgcaagacttgacgcacctatttggattttagaaga  
aaaaattgtttaaaagggttcttgtttagcgttactttataaattgttcttcatgttatatacaaatgtctgttcttattgttcatggaagataat  
tagataagtataaaaaacaggcgaaactataaagtgtacataatcataacattttctatgtaatggaaagaaaaacaaatacatagaaaat  
aaaatcagtaaaaaagagaaaggtcctTTTTTTTTTtaggaaaaagagaaaaataaaaaaggcttgggggtggaaggaaattcctatcggttca  
gacaatcatgaaaagccagagtttctgaaaatatcgggtgaaaggaaacctaagcaaaaaacgaaggtacttgaccagaaattgggatgt  
agacaaaggttaggttggtaaatTTTaaataaaaacatcaaaagtcattgaaagaaggcagggtttctcatcgtatcgtacattaaatatctg  
tgcgctgacaaaataatgttgaagcaatgaaaagattgtcaaaagccaacttaaatgagatatgtaaaaatgtaataaaatccattaaacac  
attcatgaaacattttgacgtatttggcgtagaggcgagagggaaaataaaaaaaggctcaaaaattcacttaacaactacatccgcttctg  
ttttcgttgggtgaatacttacatcaattaattgggtactttgtgtctcaacttccattccaggaagcatttgagcaattttcggaaaagttgt  
tcacattataaccagcttggcactagctccatgatcatttttagttcatttgcctttttctccttcttggcctaacttgctcaaaagtatta  
gcaaaaaagagggtccataagaaaagggtctatgcttctttcaacatgacatacctttatctgacaaatctgtttattgcccagaagcac  
aataattacatcgtcacctcgtcagcacgaacatctcaatccattttcagattcacaagaagattatggtctgtaaggaagattagcaaacgt  
tcatcattaacatgtcactcctTTTTTTTTTaaatccttcaaaaacacatagcaagtagtttgcctgtctgcaaaaagggtgcagagatgcttt  
gctttcttgggtcacatactgtaatatcgtaaacatgatagcaacagaagaatctcgaatatgaaaggaatcaaagaccgaaatcttcttgg  
ccagcggatcccaaagttgtagacgaacagtcgggtctcaagtagatcgttttacttaaaaagtcaatccaattgtagcctaagtgtgatga  
aattagataatcattcaatttttattcattcctacatctgatattgtcaaatggctacataaaaccgggttattaaagaagtttgcgga  
cggattgttctccaaaagacaagctgtatttacgcaacgaaaacgaataattgtctgacatttagaataatctattaagtcaaaaagcaaggt  
tcgctagtcaatcctctgaaactaaaatataaccgttaatgagaaggaaagaagtcgtctgcctcgagcttactcctgttgtggttgaagc  
aagtttgaataaggtggtgcaacgataccgttgcggaatggggaacaagctaaatattgacctagctaaagataagctaaatttgacgag  
atgcttctgtctgtgaaacaattaggatcaagggtatggtaaacagaactaaaaatagtagaagaacgtccaacgccttgatatagagaactga  
caagtcaaagtggtgatggaaaaaggaatactgaaacgtgatgagaataagcactcaaaatataatgtaatttattgattttgtagaac  
cagtagacgaagctaagaatggatagggtcctgcttaattttatataactgttctctattttccagcaaaaagaaataatccataataaaaaaa  
tgatcaaatggccttgaaaaaggaaaatggacacactggggattgaaccaggccaactcgcacgaaagcagcatgctaccactgcatc  
atatcccgaacttagaaggatgattgttataactgttataagaaaaaatcggggagggtgactgtgaaatggaaggatggaggaaaaatga  
gaaattactgaaaacaaagcgtccaacatgaaatggctctatgggattcattcactattgtgatcggaaatgctatttagtctaatttgggttctga  
acgctactcagaacaaaggaattttgtttttcgttggtaggtgtacgggtttacgaagaatacagttactaaataaagtaagaagaaa  
agatagtttaaaaactgctgctgttatttaacacaaaggaatttttttttgacagagaaacaaaaaattggcaatgtttcttctcacactt  
ttcgttgcactgacgagtagactcttcatataaaaattcattaaatgaaaagaatgatcatatgtcaataaagttcaaatgtacatatctt  
cgttcaattttttcattgtttattacactttaatgacgaattcttataccaaaagacaatttctgcaaaaagaatcggctgtttttttataaga

cgattccttcatttttttttatacctatcttctcatattcttctttcatttcattcattgccccgcgtcaaagtcgcttaattaggacttaaacttac  
agattctccaaccaccattaccgtccaccaaacgttgctgctttcaattcacactcaggtacaaattggtttttaaaagagtagttcatttaa  
caatagttttttacacgtgataaacagcatttattcgattcctgtaccgccctttgaagctgtaccgtgatctgttagattgttcgattcccagct  
ggattgtctatctattccttaccttagagatagtagacaaaaattgtctcgtaactgggtgattaacattcgaatcgtggcgctatatgctgacg  
atgtcttgagcttcattctcgatgatgagcaccagtgccctttggctactgtaacaagttttgatcagccatagttatcattattggcctcgtc  
ctttctatttgctcaggtataccgaattgtaaagcttgaactccaagggtcttagcttttctaccttggcttaggctacataggtgattgaat  
gctcttgccaacgtcatcatttacaagtcattccattaacaagatgctgcatgaattctactccaagcgccagtgctttgccaattctaccggtt  
gatgcaagtcggttctcaggttatggcaatgggagtcgttttctatccttttgatgtacctccccgccctatcatttctcctcgatgatgga  
aaacggtagcctattcctgaaccttaagtatcacgaaaagaaaacttggcgtagaacttctacggcttagcatttttgctgggggtctt  
gctttgcttctctgctaccgttttaacttataacttagcttgggcagcattccttggcttagtgcttctctgccaatcgtcaatacatcct  
caatttattcaacagtcgccataggtccatggcgcttaagtattctatgatgggtgtaaaaactcctgggtgcttctgatcggttacctttg  
tcgagacttctggtaaaaactggactacatatgatgatgtgtcagcgaactttacaagcagttctgcttctttatgttctactaccaccta  
caaaacaaaaagacaaacaagaagaagggttttggcgcgaactgaaaggagtgtagcgtgctgaagagtggtggaagaagaac  
tggtcctaaagacgtctatgaatcgtctacttttcatcaccgacaattatgtaattatccgacaccttgaatgatatttcttcttagaattct  
caaaagccaatcgtttttcatttctcacgctccttttattgtttataatgctttatttataaatgcttacctctataaatgtaaaactaac  
aattctttatcatcagttgaggaattgcaaaacttataatagctgtaaaatataaatgttttaataatgcttatttttttagaaaattatca  
aatatgctggttagaaaacgtagcaatttctgggtcatttgatgccacatacactctacttgaagctattgcaaaggaagacaagagctgttg  
agacaaaacgtctcatatgaactgaaccgggtgaacatggaaaaaaggcatgaattctgaagaaattgctttatgatagacaaattagac  
ttggggctcaatgcgcaacatgcgtaagtgtttgctgatctatgagaactcctaaccaacgttatttagactaaggcaatcacgagtttgttaa  
ttacagcttctctttatcgaatgaaattgcaagaatttagtttggcaggcattggagagttatgcttgcaggacactcgttctgttgaaaaaa  
agacgtgttgaccagttcttggtaacagtcggacataggaaagtccaagatatctgccttagaaaaattaaagaactcaaccctctggt  
aaaacttctcttggatacaccagttgaggagctatctgaaagcacagtcttctttcagatggttattgcaactcaactcagtagcaagagt  
tctgcaagtaaatctctatgctccttctcagcgtcgtttatgcttgcagctgtacggactttacggattcgtttcgcagatttggttcatca  
tgaatttgaatgtaagtcaatggcctatcaacgtgtcttaactgagaataaaactaacctttatcagtgagaaaaaggtgaaaataaaaa  
gttgagcaagcattgtcagctactcaaaaaccatccaagaagctctcgatatcctcttgggtcgaagctaaaaccagtttggcaaaaaagt  
acctgcccttatccggcaatacttgaagttattagctacagaggagaatggttcaatcaagcaagctaacattggatagcaatttgaagta  
caacaagttagaccggcaatccatcaagaaggtgtcatgaacagcaattagactcaaatgcaattgtgaatgaaggattttaaagtaagat  
ctagttcctttttgatcgctatgttattaactataataagcaacttttctgataactccagtttcaatggatgccagtgattcaatcattggagg  
gttgttggccaagacgcttgaatcaataagtaagcgtcagtatccatagataatcttggatctatgatgctgaaaccagtgctggaacctat  
acatgctgtaatatatgagttggttatttataactaagaaggttttttaactacttctctaaaatttagatctctattatgtaaatcttatat  
agacgctgtctaaccacttcttctgctactcattttgacatttgttggtttagattatagtgagtgctgctacaccgcttctcaacaactacagta  
acaactcgtcagttaaattcgaagaacggtaaatggactacgtaacaaaaaaagcagtcagtaacaataaataaggacaaacgcgc  
tcccttttttacacacatacgtattagttactattgttttaccgaacttagttaataattggtaagtataatgaacacaattaaagataaaag  
tgatgacaaaacgacaaatagcagaataactcgtgtgaaatttggttatataatgaatttcagccttctgattagtgcttttttttttcta  
tttgcaacgtaaccctcatagacttattgaaattatcagttaaatagctgcttactaaatgtagtgatgtaagttaatccttcaacg  
ttatgcgttaagaggatgagttccaagacataacggcggaactaaattggtcacatttaaggcttcaactgtacattgaagtcgtggcgcttgt  
tgattcagcttactgatttctgcattactgttgggtccattttagtattcaaattatcactaacaatttttagagaattgtattgtagcgttatat  
aaatttttaagggaatgatggctttaaataatgacctgttgcagtgatgacaaaattcacactgtcgaatctgccatgatttcttaataactc  
tgagcaacgctgtcatatttcttagttatcttctataaataaaacagtaatgaaaaagttcatgttatcttgatataatgtcacaggaagataaatg  
aagtgtgaatataatgaacgttcatctactaatggttataatgcttggataaactagctaaagatgtgtaaggtaaaggtcgacaggcaa  
tttaacagtttacgttggactatataatgctcctatttttcttggattttacttgtataatgctgatgatttttaagcttatgaatattccctaat  
tttcaagtactattagcatttctaataatgaagttatgaaggaccattgtaacacttccaaagcaaagtgaaactttaggccacgcctacc  
cctaaaatgaaatggaagtagacctgtaaaacagcctatgcgaactgtcaagtactcaatactactatcattctagtatatcaatgaaataaggt  
ttcaaaagttatgaattaaaagtattaatgttcatattcagcggatgaagaatccgaccaaataagcttttatataatgtattcagtgataac  
gaatgcatttgatacacaacaagtaatttaattgttatttttaccagattaaactcacatattagatcctttttatgttactaacgcat  
gaaaaccgctcatgaaatgacatattaaacgcttgggagaaacaccttcatgaacagcgccgttgcaccgcatcttaactcagtaaaa  
ctccggcgaggataaccaatcacaaaaggttcccatcctcgcgttctaaagcataacgcttgataagaggacgtaaaagatccaaaattca  
cgctctgaactgaagcgataaagcttattaagtcttggccaaagtgaccaccacctaacaatttaggtgtttgggtccttaccacac

aggcaatctcagctaccaaggacgagagcaaccattaccacaaccagtcatacgcataacaatgctatctttctgaagtccagcttcattatga  
tgtcttcaaccttggtaataagtttgggaaggatcgttcactttcagccaatgcaagtcacaagtggggaaagcaacacatgccgctgaagaa  
agacgtaagccagtaaaggcagtagtcaagcttataattagccaaaagtcagaaacctcctaactctcagaagaacattagacaaca  
taaggtgttggttagctgtaagcggaattcggccttggagttattctttaaagcttctcagcgagctcacgaaacctgtcttaaaagaagatc  
tccactgtcttcaacgaccattctcaatgaaaatggtacgccagtagtggccttttcggttgggtgccaacctcaaatcatcagatttttga  
caaatggagcatgttcagagcaggctcaaggtaaagccacctacttctcagttttctgtttaaactctcaacgctcagagatccacagtata  
cttgagacgggctgtttacggttttcacgatcaccattatcacgttgaactatgagtagcggctttaaagcatcaacaactttatcattaggaatgt  
aaccaataaccgaaccgagacggggatgttttctgttggtagtcttccataccaccaacagctaaattgtatccaactacttttagt  
accttccgtaatagcagaccagaccgacatcattgtatataatgtcgacatcgttatgtggaggagcaacaataccaaccttaaaatcttgggaag  
ataagtaggtccatataaaggctcgacatcttgagcagctcaccagcgatcttcttcttgaacctctccggatcttcaaatcaaatctatgat  
aagatgaggtttagggagcaagaattgctaagttccttagaagcttcaaaaagttgagcatgaatttctcatttccgggaacggatgaacaa  
gtaacgttacgagcaacatcaccacaggcacctaaagtagttaaatactttagaaattgagcgaatagcatttctcaggttcttctcagaacg  
ccgtgccattggaaggttgacgagtagtctttcaagcttattacccatttccggaaatatcatcatggctaaccattgtctcgggagtg  
aaacaccagctgtaaacgagcgcgaatcataaacccgtaagcaggttaaggcctgtttcttgcgttcttccggatcacggatcacggtcatctgca  
tgtaaatacatggaacttggtaactgacaatcgtgctctgaaagtcaccagtagtagtgcagccaaacctccatgatagtagtaccagtaaa  
aagttcgaagccgtcttaatacttctgttagtaatcggttgggctcatcaatatcaaatctgtctaagcccattgtgcccgaagttcagg  
ttccaagcattgtaagcagctccaacctcaggtcttggctattaccaacctaatggaagaaggggcttggctccaaattcttgaacttt  
gcatcaattgtttaccgggacgattgtaataaagtttactcttaccgagccaatattcgtaatcaccaaaacaaatacaccataattagat  
tattcaaaacaaatcagcattcttaaatgcttcccagaattcaaaaccttttaggaaaaatcaccttgaccagcagtagtaaccagtaaaaca  
acgttctgtttcttggtaattctcaattggataatcatcacaacctgatttgcattggagccacgagcactgtctactgtgaaggcgttta  
gagcattttcagcagtagcaccatctgacgcatacaaaatgtcaaggaggaccgatagacctcaataagtttgaagagcattacgaga  
atcgacattttgcttatgacggacatcagcaccaaaggattgggtaagagttgagataaagcaggttacgtaaaagtcaactgtgcaaatagtt  
atcccttcaaggaagcgcgaagctggtacgaatcgttcagaatccaactgaaaaatcggagcttccaccatctcaagagcaggagccaac  
gatacaagggccagtaaccaacgtcaacagcttcttgggttcttgaataacagtaatagcatcatcattgggagaatggaaggaagataagcc  
aaaacaacggaaggaccttaagttgtagcttccaacaagaagaatgacttgagtgtaagaactgtaagagcagtagaagcgacataa  
gcatgcccgaatcattgctgaagaccgatctcttttgcgtgaagaagcagcagcactcacgggtggaataggttgggtgctgataatg  
agtaaattaacgttagattcaggcaagagcttgatgcaaagccgagttgccaaatcgtaagcccaagaatcagaacctgatccaatgag  
aaaaattgtaaaaaagtgagaacgatcaagcaagactgataaccagcgagcaatctttttgagttctgcgacaacgagctcaggatcgac  
aggtagctccaaattgtcgacagagacaatccaattagaagaacctgcaagattctgctgaaacatcagcagattcagtttttaaaatagaag  
caactcatcaaaaaggtgctgctgttttcatattccaatacagtagtccaaagcgaactgaggtgaaataataagacgcggggatgcaaca  
ggcttggaggtattgggtctattacgacattaagcagccttaaaaacgctggaagcaactgtgataggcatcctcaatggcgggaggag  
gggaacaaagacctgctggccacctcagtgaaatagcaacaatagaaggcttagccgagttgtaattgtttcgatagcggcagaactatgc  
ctgtaacgtgctcagaagattgcaaaccatacttaacagccaataattgaacattggatttagcagagacaacagatgcccgaatccaagtag  
aaagggtccatttacgaggaaggttctgtaggggttctaatacagcaaggccttccaggtgatggaatggaataataggtcgtcaggtta  
accatggagcagaacgcgaatgacgacgatccaacagagccttgtgaagggcagatttagaaagcaaggggaagcactaccgaaagcc  
aaaagaacgtgggaggcatctgagggaccataatattcaaatggcttgaagaatgtgaagaagaaaagcataagatcggcatcacgagc  
tggtgatcataaacaggggggacatatgacgaagactttcacttcttctgtttttgggattcagaggggaagatcggcaaccgagcagcctc  
taaattcttcttgggaaggaagcgaattcaggtcttcaaaagcaacagatgactataaacggggtgtaaaagtgcaaaacaccggtattctgtc  
gacagcgagattgtgcaagagtagcagtttgaaggacgtcgtttagggcatcttctcggtagccttggggcagtttccggaaagcaaaataa  
caaatctgtgtcacgtacggaggcaaaatcaaaagcttccgtaggatccagagcagatgtgggctacaacaggctgatgagagattgtacag  
atggggggtagcaaaagaagagagaatcagcagaagctcagactgaataatattgttaggagtagggactaaggattcttctcagcaaaagaa  
gaaatcagtaatatgtcaaaaggatctgcatgagattcaaggaaacaatagaagtggtttaccggaaatattaaggcctcaagttccgta  
aatctgtacagccttgggaaggtgtatcgaggtgtcattcgtggatgaacaacatagaggagtcagcacatcgaaagcagctcagagtc  
actgcttctcgtgtttgctgtagggctttaaagctatagcgaacagataaccgtttaaacaatacaacttggtcaaaaatcgtgaactagaata  
gaactgtttgcttgaatggcgatgacagtagcaaaattatcgaataaagaaaaaaattagaactttacaatttataacaaaagaattca  
acgaattaaataattcctatgaaaatgataagaataaatcataagacttaatacaaatgcacagttaagagaatttctagttgttccgtttat  
gaaccgaaagaatcagcaattcctacggtttcccttctgattcaacttcttccaaatatttaggaaagcagcaacaacaaggaaagcaa  
aactcaaaagaagattgcgtagaggcaagttatattcgttgattgttcttgagaaattgtaccgtatattgcgtgattgccgtggtcgt



aatttcgggtctatcgcgtaatagacttgttacttggccaagaagcctaaaggatagtcaaaagctcgataaaggaaacggttttacatcttt  
gttttttggacaacaatttcgatttcagttttggaacaaaaaaaaatttaattgtttccctttcttgatacgttcattggttggctcgaagggttc  
aatgcttttcatcgacaatcatatttctccattgcgctcctatttaaaagcgttcattgatcgttagcgacacggccaccaatcatcacta  
aggaaaaaaaaatagcgataaggagtgaacatttggtattgaagataggagggtggggcaagtaattggttttaccatttttggatgcgaaa  
gtccttcatttgatgttatatgcttggatcttttattttctttattttgaatacatcttttttttattggtttatggaaggaatcggtaccatt  
tgctggaacttctgtactagcaacctctactacggttcaataagaagcaagtcctatccagaaaaagtaataaacaacaaaaatttctgaat  
ttgaaaaagtcaatagtttctttccaaaggaaacgttttactattgttttctaacttttctttcttctgttcttgtgccccatgtcttttgcacat  
gaattccctaattctgtagtggtgtattttgtttttctggagagcacaagcggagcgcacaaaagatacatcgagagtcattgggaaaaaaga  
aaaaaggaaatcaaaaggactgtgggtcaatcagacacaatctaatacctaacttctactaccatgttttaattgtaattacgatatgtaaac  
aattcatcccaacaaagtcttctgcacatgaattttttgtatacttttctaaaaattttattttgcttagattcacaattcatcactgattct  
tacattctataaataccttgaattctaaccacaaaatccatgactgtagagacctcaaaaataaaaaatatttctactttccctttcatcaaacgct  
tcaaaaacttaatacgataaagtaataatttccatagcattaccttctctttttgtttgagagtcctcattcatctgcttttcaaaccgatta  
aatagcggcacaacttttgccttttctgacttggatatttggttcggttcgcaaattgaaaaacgtcggtgccacctccacaagccatcgagg  
atgaatcgactgaccgatgcataactcctctgtctgtaattaactcatgataaattaccactcagctggtttacaaacacaaactactg  
ggatgcataacttgcatttccactgtcgtctatagcatctctcatcgagtcctcttggctacattcgtaaaggtccagaacacacgc  
gcgcagaatcaattcccatttgcaccacacgatattaccggctgacgataacggctccatcaatctcagattttggttacgtacatcttactctcc  
gaagcctcgcgcttgaatgtaattcataacaccaattgtctgagcatctgttagtttccatgccgtatatacattcaatagcgtcaaatgatca  
ctttctggattcgaacactgcgcacagatgtttatccgcttctgtccttcccttggccggtccagatattgggaacacttaacatggctataatt  
gtcaaaagcttctcagaacatcccagttccacactcgtaatcaaacctttgataattgtggctccataggaagtcagccattttgcgaccaac  
ggtgtaacaatccttctcatccagagccgataatgcatacaagttctgcaaaagcgcacacctcgtctgcgtggtgggtggtccataaagtc  
aagttcagcagatcattaattccatggcttttagcataaggattgataagaagatttgacgttgaaatcaggaacccgactaggtagcatct  
cattctggaagcattttcagtgataaacgataacactttccgggtcctgtacgcctgcacgtccgcttcttcttagcttgcctgcgaaattg  
gagtaactacaagagaatccatacctaactttgggtcaaaacaacttgccttcaaaaaccaggatcgaccacatagtaaattccatcaattgtca  
aactgtctctgcgatattttagcaataactaccttctctctgagagcaggttcgaaaatacgaacttctgtttcagaaggaagcgcaga  
atacacgggtagaataaccaattcaggtacagagtccttagcattttgttcttcatggagaatttcacagctggatcgatttctcttgcctgt  
caaaaatacaaaaatcacctgggcctcagtcgaatgtatttcattacggtaatagtgctgcacgcagatagtcacttctgggtgcttagcat  
ataaaattcaacaggataagagcggccaggaattgtaaaaataggacattatgaaaataaggaggaaccgttctgcgtctaattggtgaga  
tgtaacaattagctcagatcaggtcttttcttaccgatgttttagcaatcaaaacaaacatcagtagcaaccgttcttcatgtcctcatca  
gaattataacagaatattttcaagagtggatcaaccaaaccatcagctgaagcataccatctgcatgtattaattgagctattctactgtc  
ttatctcgaacgaatggtataaccaacttcttccaactcgacatccaacttctcagcaacacgcttgcactgcacatagcagcaacacgt  
cttggctgagtaaacgactatttcttattatccgtataccctctcagctaggtattgggagattgagtagtttaccggagcctgtctcacc  
aacaactaaaacttggttttgaacggcttcaaaaacgccttccgaagttaaagacaggaggttttcttcttcttacttaag  
acgttcttctcgtatgatatacaggacccttgcagattgtcgcagctgggagcctgagtagtcatttgttagcagctgattgctatattcct  
gagcaatttcttcttccggacgggccattgtatcattccagaccaaagataagtctgttttctagttcttttgccttgaagcgcgttcttct  
tgacgcatctcgcaggtcactagtagtacttgccttgcattgcagctgcagataaagatccgtcaggcgttttaaaactttataggagaaa  
gcttaaggagagccttgggtgaccagctaggaatcaggttcttcatcacgaattcaattcaacatcttcatcatctcaggttcaactcaggg  
ttattaaaggtagtaaatcctcctgaaaccaggaatactcgataatgagattgttctgaaagcagccaactgttgtagtcccaatctcagga  
gatgtcagctcttcttccattgttctacgggatcaaaagaaatcagatccctgtccattttctgatccccgtccccgtttaaacccactgagta  
gccccagtagccagataaacggcattgtcatcagttttcggctttaaactcctctcagtaacctgatcaacttctcagagaggcctatccttt  
actagcttctgctacccgggtaaccttaactaaaacaggttgcctatgataacaacatcagagggatgctcaacacgtcggccaccattaaatt  
agatacatgaccaaacatctgttcttgggaaaaagcgtctagtgtaaaaagcaccacaaaatcctttatactagaaaacaataccagggtat  
ttcatgtagttgggaaccgctataagcattcgttttgcagctcgagaagcagaaccaccatcgagggcgattaggatataccggctcagt  
gggagatcgatcccagaccggtgagggaggagggttctgtatcttctgtatgaaactgttcttagagttatccagccttctgaaacgaga  
agagctggccagctgatttaattcgttcatcgtatcattcattaaactcgtcttcttagactttcaagattactatgatcgggaatacttagacc  
aggaaacaactcccgttgcacccacatcatccctttagacgttaaattaggctctgtaattttttgatcaacgatcatcttgagctttcgc  
ctttagcttggatgtaattccgaattaatctagcgatgttttgaaaaatgactctgcaactctcctcctgatgctaggacgttttcttaaattc  
atcataagtcttggaaatgctgtacaagttattacaattcagaaagattttatcatcaatccctaattatattagcataattctttaaattgct  
ccaattcttaattgccaatggcaaaaaacataccagatgatatttttttccagaggcaaccttgaacacagagacaggttactccaattctccta

agtcattcctcaatataataagatgaaaattggaattaataaaacgaaggaaatggtataacatttaggcgttactaatgtgtaa  
atagaagagtacaaatgatcgaaattccaataggagacacgattagatgtactcgttatatcaattaatataaaataacgatactgagggtgaa  
aatgcaatcattggaatcgatgcaaaacaagttgaaaggaagcattacagcttagttattaaatatttacttttggaaatgaaagtattaaac  
ttgaaactataacatctttatataccaaaataaaaaatgaacacaaaaacagatgtcaaaaggtttacaatattttagtctataaaacttaca  
taactctaatttgaataaatagattgtgtgtccactcaatgcaacacatcattatccagttgaaagttaaatacaagtgattaaacaaccc  
aagtgttaaccaagtacaaaacaaaacctaagtaatacaaaatataaagtgagagacaataatagtaggccaatccatcccaattt  
tagagaagcattgaagtatacggtttaactacttaacggtagaacaatagtagcttggtgtaacctctacagattcggatgaatcagcaa  
gagccgaatcagcattaaagtgagaacatcactccattccacagattcaccagaactaatgaactgatcaagtaaacagcgctagcggcaac  
caaccgaaaatgggagtagatggttgagaggcttgaaagatattcagggtagattgacacactcaagtaaggatgatcgcttctcaa  
taattccatacgtcagcttttcatctttaccgacaaaagtgagaccctcttccatgagttcgacatactggggttaacctataacgatga  
cgtatgacgctcaataacttctccgaattctatgaagcttaccggagttactcattcactattaggctggaagatagtaggagcgaaccta  
gcattgtaccaccaactgtctttattgattcaggcatgtaacaataacatgcttctcgttgaggatcaaacctctcagaggtagcatctaa  
aaaatgttagttaaagaaccaggaaaataatcccattttccccatttattgtcttctaactttaatatagcacctgtctacagttaaatc  
aatggggaatgataataacctctagtaggtgcatgttactgaatacagctaaaaagacagtaacgagggacctgggataccaatattgtaa  
cttacgctcaattcacaacatgacgggcaaacctcaattacggcaactgaagaccgagacagatacccaaataaggagtgattttcagctg  
cccactgagcagcagcaatcattccctcaataaccacgagaacaaaccaccgggaaccaagataaccgttgcagagcacaccaaagccaag  
ccttggtgtaactaaggggatcagtggtcactagcctctaaatgggaagcctcaaccattgtaaatcgagcttacgaccacaacgcatag  
cagagtgtccaaagccttaatgacggaaatataaggaatcttaagatgtgtgattttccaacgaggacaatgtaacctttgaaaagacggg  
catgaccagaagtcagaagctccaagagttccacataaccgaaccggcgtcagcattacagaagagataggaatctgatccgactgaagcg  
aatttaagaaaatcaacaacttttcaagaagttgaggaacatgataggtactagaacaatcatggacagccaaaacctgttcaggggcaa  
catgacagaaaagagaaatctttcaataacattttcctcaagaggtagcttgcagcggcaggcaataaatcaggcataatacctaaactacga  
agatctctgatcgcttgttagtaggtctgtttttgtcaccgttaataacaggaacaaggatacgtgaatagacacgaaatattcccgtcaa  
cacggaactgaaatgacgcatagcttcaaaaaagcagcagattcaataatcgcaaccgtaccaccgagttcgacaatacaaacatctggttct  
tcaccacttgatcaactggtacagcaacacgttcaaccatcctggattcattctgacatgggggacgatttgcagtttgccaagat  
agtaccacggcgtcttctcaatgacttttgaataaaccttaccggtagtaataattgttgccttagtcaaagtaacgttcaataacgctcatag  
ttcccaaatacaaatcaacttaccaccatctttaaacaataacttctccatgttccagtggtgacatggcccagctcaatgttcatatag  
atcgatttaatactggttacttttaaccaaggttttagcagtaaacagtggaagaggcaatcacacctttccaataaccgctaataacacct  
ccggatactagatcatattcatcttgatccccctttgttctcacaagttgggtgtagctggaggagagaaaaagaatgtagtcatggtcctt  
atgagggcagggtgaaaatttttttatttttttaacccagcaatattggtatttttttccgttttcttattttaagattttttataataca  
aaattgacagcgttctcaatctatagaaagtaacagtaactttggattgggttccacaccaataaccactaaagttgggtaaatggaccgaat  
aaagataaattatgatgtatactcttaggatctaattgaaatattcagctaggataaagcatgaggaagatatcaaaaccagagaaggtg  
aattttccggaacaaccaagagaattgcatgaggagaaatcacacactgattctggatcaaaatggtcacctttgggcttggagataacag  
aaagttacagtggttcaaacgttgcagcgttattgtagatgaattaacaacactgaaaccttgaagtcagattatctcatgagttcaa  
atcgcaacagaaaaaatggtccatggtgctgctggatgggaattagcgtcttgggtgggaaaagacagaagaactgttggacatgcggtg  
ctggtcctcatggagagctagccaggagaggttgggggctgctttaaagaaatattgatcccttcaatcaaatgaaattatactag  
acatatctcaagtgaaacattggatctgtttacgaaccagggtacgtttatggctgtggagacggacgtaagggtcaataggaccagtg  
gttcaaagatgaccaacaagttcagttttggcacaagtagagcatgctcataaggtatgttgcgacttcagtttctccttctcaagaaa  
cgggtcgagtaagtatactaggcggtagcgttggaaatcttctgaggaatgcatgcatggcaggataataatccgaagcttcttcttattgtt  
gatatacttcaagttggtctacactgtcttactagattccaatggaagaattatgattcggcagaggtgatcgtctcaaaaagcacatactg  
tacaaaataacgcgcaaacgattgctggaggtagcgaacacaatattgtgcagacaaaatcaatggaagcatatatttggatggaacgaac  
atggaacgcatttaatgaagatcgtaagatgtttaccaggctaaaaactgagattgccaggagcggctcattatgtagcagcaggctatgca  
acgacatggatagcaacagaaaacgagtaggaagtctaaataaaacaaagtcaggatgattgataaatttaaaggctagatgaaagtata  
gcaggacagcacaataaataaagaaatctttatataatgatagaactcaaacattttatagcgtgtattacattgtatagatattatga  
aaaagcagagaaacgaaatctattgaataaaaaatggaagacgaaaagatagaattaagggttaacatctttagcaatgaaagctcggata  
acggcaagaataatttaagcgtcagttccaaggaaacgagctaatgctagtcgagaaaaaccacaacggcaatgccccacgactttgaaac  
catttctgttacttctgatgcttcaatctgcctccgatgactaggatttttattctgagttgctgattcggcatttaccttgccttgcggc  
agcttgtccattatgtctgccgattctgctcaaaagtccggaaatacggcaacaaactgggattatcattaaattaaccgcttagtatcct  
ttgcataggctcgttctgtgattcgggctgacaatgccacctgtagttattcatcggaggtcataaacgagacgaggccaacaagaatcgtc

aaaccatccatgcaggattccacgacttgggatgaaagtcagaaaacgacagacataaacgagtattgtttgaaaacgtccacttggcgtatc  
atccgtattgctggaggcttaaaaggatactctgaagggaatataagagttctgtataacattatgtagcgcaaacagaagcaaacgatt  
tgctttatgcacgaacatgatattgaccaccctcatatggcgtgtctggaggaccagtaacgatataatgccattctaaaatgtttcaggtgct  
ggcttggcgtcaatatactctacaggatttcttgaagcgttaaatattcttctaactaaaaatgtagtagaattactttctgtatctataccct  
cttataagcagcctttagcatttttgactcaatgagtttaggaattggaaagaagccaccgcaaaaattattaccatcaaaaatacaaacatga  
agattgtttcattcttggtagtaactaaagagaaaaatgtttattttactttttttcattttttttacatctttattctgtttccaagaacaatga  
tgagcatccaacgtttctgttcatcctttagactcggctgaaattcgggtcgggagagccttacttttactttcttagttcgttattcgttgattcatg  
agaccagagtcatttctatgtttgatgtatttcatgtactccatcctgacaaacctgccaaaagttcaccctgtaaacatccaagttccaaag  
aaagaatacgtattgttactaaaaataaagctatgaaactggcgtcttataaagcatgggttccactttaaactatctgtcttgatgaaatggaat  
gaaagttcatactgttcaagatacctatccggtaagcaacacttcaattacaataccaatgattccttcttaggacaacaagaagatgaatat  
taaaacctccagctccctgtttcatggcatattcatttggtagctgtttaaatacataattagcatgttctgatattactgtcatccttataaagcat  
attactataatccttaagattatagatgaataaaacataattaagtcatacaattatataagaaagctttatgacgtatttattcaagcttataat  
ggcgacctcatgtgtagtcagcctttaccaactaagatttccaatagtagcgaatgagtaacaggttattgttaagaatatttcttttagcgttac  
tgagaagcaaatcctcgatttctttccttctgcggaaaggtttccagcatctcaactgcaaaagaaggagatactcaaactgccaatatccaatt  
gaacgccctagcggcacgaagactgcattgctttgcaagatgccctcttaggacaaaacaaaatccaataagcagtagcgacgccccagctg  
ccgctggtaacgtcttcgacaaggggtgctggtggagatcaagctactagccaagaagataagcctcgttctgcgattatttctgaacttttaag  
tcgtggataccatctgagcgtatttcttggagaaaggtatacaattagatcaaaccttgggttctgctcagattcaaacgttcttgaagc  
gcgttcttagtgttccatgaatgagcgtaccacgtcagtgagaaagctaatgaagttgataacaagctctctatcagtgatacctttaacc  
gtactactcttagtcggcaactatttcaataaagcttagaaactgctgccggcacatcagctggtcaaaaggttttagtgcttaccggctctggt  
aaaagccagttgtttggaattcacagtcagctcgaactgctgactccaagagccatgctcaaaatgtactaccgggcatactgaagctac  
acctgccgctcctaccgatccctccgtagacactaagccttccgagtaagctgtagaaacaagatcaaaccaaaatatctgttcttcaattatct  
tggcttttgatctttacgttatgggatacgtggctcacgttcagacatattgagaataggtattcagatcttggtagaggcctttcgaattaata  
tttaatgattatgaatacctgtgatattgaaaagagaatttaataataaaacttgatgttctgttagtacaagaagatttctttcatgttaag  
atgaattaattgttaatttagtctcaaacataggttttgcgtaaacatataatcatagtcgaactcaaaatctacagtaaatattattgctttc  
caaccgattaacgattccagggtcctcaacaacctcagattaatgactcagatgccttcttagaaaaccgaattgatgatcagagggtgtaca  
ttttacatgcaacttaagtcttactcaaaaggaaactttataaaaaaaaacaaagattgtaatcctcctttcgttgatccgaccgttctggcttg  
atcatcaatcaacaccattgagctttcatatcaggataagtaagaaaataaacctttctatcgttttctctatcactgcatcttcagggtta  
ccgtcgaagcattcagttattaaaattcaggtattttggtagctattagatccaacctgttaccttctatatactctgtcctagccatataattc  
actttgtcacatattattgctcgtactttattaagccttattattgaaggtgtaatgcctaaatgaaaagtcattattctattcatcaacgtttatgct  
atgtttgtttctgagaaagtaaaacaacaagattcagaggatatacggcactcccaaaaaccagctctgaatagaggatcatagcactaaatt  
atttttcacctgtcatcgtcgttttactgaacagctctgacaaaacgttgaactctataaagaaaacgttcaactttgattttgatatttcat  
gttcttaggatcctatgaatagcctatttcaagcctccaagctttaaaggaaggtttgctagaaaaactcaaaatcgataaaaagaaaag  
aacggaattcacctcataaatatgcttaacaaaaagaaaattataaagtaaaaattagtgaaaattatttagacacactttgaacaaagttc  
ggtaaaacatttgattcttaagatgagataatcagccgagagtaacctgtaagttcaaatgtatttttaacgaaatagaagaagtaagaagctact  
tttctacctcggtagagggttgacactgtaaatccacggtagcacaacttctggagcattcgtcgtatgggttcatcacttattccttgattg  
ggttactatattcggtaacggcaggctcatcaacaccaacttcttcttacttctggttttggggtgctcttgttctttttctgttaggttctttt  
tagcctttgctcagcggcaccatcaaagatttttcttctctatctgtcaaagcattccaagaatctcaagcatttttttaactctgttccctc  
aatgcactaccttcttctttaaattcactttcttctgagaggaaaaataggtaaaagccatataatttgaactctgggtatcgcagcattggccttc  
tgtgtgggttttgagcatctgcattattattggacctcctctcgttactacttttcagcgcaccaatgatgcagcatccttctgtgtttgtacc  
agctccgatgctcgttttctctgacttctcatttgaatttgggtcctctggatttcagcaacgtttttggattcttcaagctctgatttagt  
ggaaggggactttcgtttctgtttgtggttagtacctttgggtggaatattttatctttatccttcaggagggtgctacagaagttagtaaaaatt  
agcttaatacaatagtttttattaccggaggagattgtcgagattgctgaccaagctgatcagcctttctgagattgctttccaactgttccatc  
aagaagctcgtctagcttgcgctcgaaccgctcgtctaatataatcataatttttaataagatactcatttccgtctgacttgaatattctag  
cctttaaactcttgcattttgtcggacttaactctaaattctgttagaaatactgcctctacattttcatgagcttctcctcaccttcagactttgata  
cagctgctggataggactatttgtctcattagtcacaattctgtttactgtacagaaggtaagtcgctggccaccttaactgagagtgactta  
tgactttgactttggaagattccacaaaaaaggagtaagaaaataaaaacttatattcatagatattagaatctactatctatgaataatt  
atttgaattccagttccagtttgaatgttcaagcttagtacttaaaaaatgaggatctacagacgataatcttataaacatattataaaaag  
taaataaactcatatatacgtattacctaataaatcatttatattaatagtttaaaagtaggagaccaactcttgcaaatgaaaattactcaag

agtaaacattagagcgtcatcaatattatgtataaaataagtaagtaacaagtaaacggagcataataacaatcctttatccttcaacaaacttc  
atagcttcatcttggaaattgttcgactgttgaaccttatgattgaacataaacaccataaaacgtgtcagcagctttaaaccatttcaggtcggga  
aagttgtgcataaaattggctgttttagacatttctttacatagacgcaatgcagaccggtattgagcatctaaattgcatcacattcgtcg  
agaatattaaagggtgcaggatcacatcgctgaatcgcaaaaattaaagctaaagcacacagagacttttgacctccactgagttgatgaatgct  
tagctgttcatcatcttactattaaaggatacacggataccaacgcctgtataattatcgattgaacttttctgagctgcttggttatcgatgcat  
tgtatcttctgttcagaactctgactgagttcgcttctgtttatcataaccaattaccgctccagcaggaacgagctttcaaaaatttcagaaa  
agtctttgctacctgcttgaagtgctctatggcttcatctttcgtgatctagaccattgtaagctcattaatagaatcctgagaccttcttaa  
ctcttctttagcaattagggatcacgctgtttgtaaagttgtgtattgctcatatgccttctttaacgcttccatattcttcaagcctcat  
taacctgtgtaatcttttactatagcattgaaactagtggaacgtatttaacgaaagcttctcgggtaaaacaccaagtacttaattttcgt  
tacattccttctacgagcaagtaaaaggctccttttagcagcatttctctcattactttcactcgtgttctattttgctgctgcttcatgctgtaatt  
cttcaatgtctctgttcttctcctcggcttgaagtcattaaccagggtttggattgattttcaagttttgagatgcatctcaagtttatgaagc  
ttgctcgtgttttcgagagtttcttaacactggagagttcggattcatcaacaagattatccataaccgagttgtacctcaggggatcacgtctt  
aaataaagattcgtattcaactgatattcaagattaacctttgggactcaattcactcgttttagtattatcattgtaacacagacaattgc  
tcaattgagtttcaaatgtttaagcttttcatatccctaggatccatttctacatgtctgactgaagttcttcttaaaatcttcaattgctgctc  
tgaggttggagttctaatttgccaaatgtagatcatgaacctttctacgatgagagccttgaacttctgcttcttgcgttatagacactgttct  
aaattaaggggagcatgatcacgttccagctgcttgaattcaactctgcttttgaactcatttaagcaaatagttattcttgatcaactgaatc  
gatttgagtagtactcttcaagattcgtttgaatatcaacaagctgtttctgatatttttgacatttttaagggcatctaaacgagagttttataa  
tcacgataaccaccagataaggcaccttctgtcagaacggctaccacttaaagttattccgctcagttgatgtgatctagcatactgtgatgcaa  
cctcaatagaaggacatacaatagcttagagaatactgttgaaaagcgggtgatattttgtgtcgtactcaagaaaattaagcaaaaggtaa  
gcatcactggcgtcaggataacttactggcttggatgaagcctatttaaaggcatgaatgtgactctccagcattttgtttatacattacctgtaa  
aatctgatcggctgtagagtcgaatcaacgacaacatggaacaaactatttctcgggtgctccacagctgttttaaccgggttatcaacgcta  
aaaagatcgcataagggacatagcaaccagtcagtttaagcgttctgcaatttcttaacagactttaaccattactagtttctatccatgg  
tcgtactcatgctttttcagattgtgaaagatcgttttgatacttccagtcagtttagcttagccttccctccagagttctttcgtctatca  
atagattctcttttgttcgtaattgaagaaaccttagccattgctccagcggtaagttcgcctctagacgaaagtgctgattgaaatcttgttta  
cgaaaagctttcgcacatgctgcagaaacattcttaattcaatatttaattctgaaatccggtgattttgggtctgatactgaagaaatctct  
tctatttgggcctttatccaaatcgcttcttctttagcaaaactgggatacttctgattgtttgtctagaatggttctcgtggtttgtaaaga  
tagtatctgttattgaagatcaactgagaataattcattgtactgaggataatgttctgcaattctgattctttatcatggatttcagattc  
caacgactgaagcattcaacctttgaagctcatcctttagaaaattcaatttgacgcagcaattgctgaaattgcaaatccacagctgcttta  
gacttgataaggtttgtgtaattctctcattctgttgttttcgagccgaagcaaatgcagaaattctttagttcgggtgatttcacctttgattgctc  
gatacgcgtctctctcaataaacgctccagagctatctcatttttgaagcgtgctagtgcatctgttctagagcatccaagcggcattgaa  
tttcatcatgttccgagaataaatcgcatattcacaacacctccttattgtctttttatgataaacagcagagttcattctttcttctcaagttca  
tgaatcttctcaatatacttaataattcgtcaattttctcagatttgaggaccgtctctgtcataatctgttggattcggcgcgtctactttcgta  
aatctcgttctgcaacttcttaagaagttccaaacgctcagaatcttggcgtcgaagtgaagttactcgaccttggggaacaatatagat  
gggttcgaacgcgaaaatccagcagactctaaagattaattcatttttctcactgtttctatccaaggagattatccttttaagacca  
atgggtcgcagtaaaaacaactcacctttccagtgggaaagcattatcagaatttctgaatgaacctcaacatacgcgctcattacagctgaa  
ccagaccttcatgtaagagagcttgcctttctcacgtgataaatcgtgtaatcatcgccaggacaaaagcgaatagcagcaaaagaagttact  
tttctgaaccattcctcccacgatcacattgtgatgaggactgactggcttataacagtataatctttgtaagacttaaccctgaataataa  
gctaaaattcgttaactatgatcaatcgtttcaatactaacctttttatgatgataattttgttggcttggacaaatgaagcataaccagact  
cgcgtcgcgtatgtaccaataagtagcaacaaagaacaagatcaactaacattgttctatgtaccatttctgttgcaattatacatattatatt  
aaagaattaaagaaagactttattgatagttactactatgacatttacgaaatataccaacagcgaacaaacgtgggtactcaaatagttcta  
aacaatcagcatagcaccaaaggtgatttctatttttcaacttaaaaatagaatgtttctaaaaaagttactcaaatattgagaagtaaaaagt  
aaaacaaataaaagtaaacactttgtcgccaagggaataaacgttcgcttaacgaattctgtcgctaaaagtaaatagtttaataggattttat  
tctagtaagagcaattcaagctttctacagcaaatagtgtaaaatcataattcctctccttaatactcatatacttctagtagtttagtggaaaaa  
taatgacagaaaaaggagaagcatcctatctagattctgcaaaggatgaagagcaatatgaggattatagtgagggttcagagaacgaacagt  
atgaaaatctcgcagagattgactggacattagcttctcggatgcacttttctgtttatgtgaagaaacaagtttactttcgtcggctcaact  
tgatctacagcttactttgtcacttaagaatattgtcaactcatagactatgcttctttgaggctgctggttctgctcaacaggattacaagc  
gtctacacagccaaatagtagagccaaaatagcaaaaggacaggatcgtgtttcaaccctaaagcgttacatggatcacatgaatgtaaaggac  
caatttgacgggaagtgtaagttaaaggacgatcggcatgagttattcggatttttactaacatgaaaaagaaaagctagcacaagaagata

aaagtgcagagctacatctgagcaagtttagatcctcgaacacgaatgattctgttaaagttgattaataacggaacaatttcggaattaatg  
gctgtatttagtactggtaaagaggcaaatgtttatcatgctatgaatgaagaaggaaaacatcttgctatcaaaaatttcacaaacatcgattctgt  
atntaaagacagggatcggtatgtatctgggaatttcgtttcgcatggctataataagaggaaatccaagaaaaatggtagggtttgggcaga  
aaaagaaatcagaaatctgaagcagtggttttcgagcaggtatcccttctctgagccattatttaaagcaccatgctctggatgctccttttag  
gtgacaagaaaggttggccttatccaaaattgaaagatgtggatgtcagcagaggaggcaacaaaactctatggaatgggtgctagatat  
gctgacgatgtaccaagttgccatctgtccatgaggattgtcagaatataatgctttatcacaaggaaaaatctattaattgatgtttctc  
aatccgttgagcatgatcacctcgaagtttagaattttgagaatggatataactaacattaccattctcaagcgtttgacgtaaactgttg  
tccttccaaggctatttagtttgcacggaaaaaggtagcgttgagaacaagatatgaaaaaccgttggagaacttcgagagggagacc  
acgatcctgatgatgaccacgaagaagaatttctgaaaacgtacgtaccacgaacgctggaagaagttaacgatattgatcgtgatactcaaatg  
gtggaggagggaaaaagcaggaagcttagtataccgacactactgaatactgggtcaaaggaaagcgtgagcggaaaatggaatgaccctcat  
cccagcaatgactctgttcggtgacagaggatgaagagtcagcgcctctgattggatgatgacaatgattctgtaggaaagataagagtg  
ccgtgaaaaagaaagtcagagggaaaaacgcgctcgtaaacaaaaagtaaaagaagagaaagctgagaaaaggaaaacgaaggtctcaaa  
gatgagaaaaagcgtaaaaataaacagggaggtcgtaaaaaataagccagatgtttattcttttttttacgtttatttttggagggttt  
attttgataatggatagaggatataataacataaaaaatttcatttgggtatttggcattgaatttctcataagaatagaattatagtaatcatc  
gtaacttatctatagctttgacataaaaaggaatcaaaagtgagaattgtagaaggatcatcattttctcgtttcattatctcttggta  
gtttgtgctggcctttatctcttttctgtcagacaagagatttacattggtagctcagtatactgatgctctataatctcaaatgcaaag  
gtgggtctgtaaccgcatccataatgtttgcggcaataatcaccgtactgtgtcaaaaagcgtacgagcctcgtttcagctgctgctctgt  
tctagcttatataccagactgtcaactacagagcgtaccctctttcgtgaagctgtcgtctatgtatttctgaaggagagcataataggatttgc  
aaattgcgtatagtgcttttagttgatcagctcttgggtaactggggtatctccaaccgggtgtagcactcataagctcatgctgcttcat  
gacgccgattgtaagttgatttttattactcttctgcaagttgtcaagtttctcgtgctagcatccagtttctgtgatctaagaacggtaga  
atgataagctttgtttctcaaggccagttcgaagatccctcagcacagaaggaaatgattgaatcatatcgcaaaatctcaatcaattcctc  
ttctcaacatctgaaagaccggaataaattgcaaacctcagaacattggctgtaattgtgagctacctaagaagaatcagccaaagtttc  
gctatatcattgttcacaggaggaagaagctcaaaagagatagctcaagccggatgtggattgttccatagctcttccaacaatccagag  
agctttcatacgcattccatacaccgtctgactctcgaagcttctgtcttcaaatctccaggatgctgcatcgcaaacgaataaagattgg  
gatactcattcctaaagcgggatacaaacgcattctcgaagcctttcaacgatagttcaagcggctatgaagatcatttaattgcaaatgt  
tggatgatttgaacaagatttaaaagttgtttattaaggaagtggaagagtcagctggtcagcattgagaagctgttagtttagctagttcgct  
agttgtgatgctgttaacagagttttcaggcagtttttgcattctcattgtattcatgagcgtctccacaagttgacgagcttctgtaaggcc  
accttagctgtcggctcattgctcaacaagtcattaccgcacttaagcggctttgtatactccttcaagaatcactcaattgcccttttaa  
cgataaaactggtatagaaatcttaaatgattaatatttattgttatatgacctcaaaatcgtcaattcaataacttgaagcacaatgtttgag  
agtggtgaaatggtagaatgaattcgttgaatattatactatgatcacgaatttaaaagtgattttacgacaataacaattctcttgaagatat  
gtttttattttgtaacaaaggaattagattgaaaaggatataaagagagagaaatataagccttagagctactgaagatgatcaaggaaac  
ctaactaatttaagataggaacggtgagaaaaataataaaaaaaaagactatttataactgtgaattattccataaatattctattttaaaa  
gctcgtgtagcacatggcaaaagaattcactcactgaactcgacaacctaaaatggggtaaaagaaggactagataaacatttaaggaac  
aaaaggatcccagaaggagtggttttgcgatagctctttagtcttcatcgaaaaatttgacaaatcatcttctgcaacaattcgtttgctg  
aaaaagctccacagtagtataagcaaccagagagaaaaacattctgtaaaaggagctgcttcaaaagcccaagcaaaaaatccaaca  
tatgacggatgacgaacataatgatagacacctgattaacaagactgtgctcctgctcttctactagcaacgtgatcgcaaaatgattacca  
gctgtaccattgcaaatgatcgaagtaactgtcccgaacaatcaagagaattgctaaactgtgtatacccagtgacgcacaacaggacc  
atggaggggaaatggagccaggatagaattttgagctgctcatcagtgaaagtggtatttcaatgcacctattgacatggcaatccaatag  
ctaccctattgtcaaaacaaagagctccaagacaactgaggtccttgaactgtgctgttatataaaattcaattcatgaaatagcccaata  
tcgcgacaaaagcactggctctagacttcgtaaatatgctcaaatgcaccagatccaatgaccagccctaaagggtactgtagcgttatg  
aaagccattgattgatgtgaaatattcggtatttttagaaaagattatcaaaaaatctagtcacgttcggtcaaaaaatattccacaaaa  
atcctactagaatagttaaaatttcgagtagtataaaaaataaacctatagtagaagataaatttgatttaactttcaaaaacaagaaga  
caaaaacagattactatgctgtacagactggaaggggtacatcctattgctcatttcttaacttattgtctattgtaacaatagacaaaga  
acttattattctatgtcaaccgaagaattggaaaaaaaatgaacacgaatgaaaaaaagtataaatgagtcattagaaagatattgagattct  
gtagcctgtatttccactggcaggaataaataaagtataactatataatgattacaaaatagagcatggtttctgtctttcagaccaccgtt  
gtcgtcaagcttcttcatctttatcatalcctttttatcttcatctttgtttttattaattatcataacatgtaataaaaagcaataaaaaggtggc  
gatcaattcacttcacgaacagcgtgatcaaaagcctggcaacatggtaacattagaactgttaggcccagccatagagatacaccattggc  
actaaagtataggtgatactttctggcagaactggactgagcaggggtcaaacaggttaggaaaacatcccgtttgctcagtaatatgatc

ccaagtaccaggagtcttcaaagcaacgagagagtcacgtaaatgacgacgatttcattgatacggaagacatagtccttaagtctcccttcc  
attgttcaaaaagttcagggttatttaatatattcagcagcaatacgggcaccataagccggagggttcgaaatgggtgctgcttgaatcaagcaa  
agcacagattgcatcttactttcacatcgttattcttagctacatagtgaaagacaaccagtcacgctacacgtataaacccatgttttggcaaaag  
attgacagacaaaagaatctctgtcaaaacttgcaaaactcattcaaagcccaagaatcacgggtccaaatcaccactagcaaatccttgataagc  
gatacaaacacaaccaaactgcttgcgggcaagaagaacctgaacatagacttccattgctctctagtaggggtccattctgtaggattgtgagc  
acaagcgtgaaggaggaaaatgctgccttcggaagcagattcataacgtccatagttccttcaaaatcaaatcttcgggttttagcatccaata  
aggataagtctctaccttgacattgacactttcccagatagtagatgaacaggccaagtgggttagaaatgtaaacggcagctccactcttctg  
aacatagttcagctaaaaatctagcagccgtgaaatggcaccagtagcagaacggattggatagagcaaatcgggtcttctcaataat  
gctcgttgggtgaaacagaatcttcggcggcaccctttgtaaaccgaccataaccagcaatgggcatgtattcatgattgaagtaggatcttttc  
tacaatttcagtagccttcttacaactggcaaaatccatggcctaccggatcatcacggtaagcaccatgctcatgttcacctcgaagggtct  
tcatcttggctgtataaactgttgagctaaaaatggcatcaggctgagcttcaatcaattcagtaaatcaaaaatccgacatttttaacttctctg  
gctggtaaagtccaagtttagaaaacgggttccgctgctaaataagtctttccatcttgatttttctgatataaatcacctcgtttagataatctttt  
tcttaaatggatgattctcagtaaatgatatactacaatttccaaaaatgaaatgattagaataatataaaggatttaaaaaataaaagtt  
ttcaatgaagcttggttcatcactcagtaaatgtagaatgaattgattgttgaatcttctaagtgttttagtcttggtaaattcaatt  
gtattattcatatattatcctaattagagaattgctctctcatagtttgcaaggacaagataaagtgttcgtagaataagttcaattcctatg  
ctttcggacagtcaatgaacagatatcatctgtactcttaacaggaatctccgggaccgaatgtcaccagggaacattatgttgaaaaaac  
caatatatgggtgaaagtagcttttgggtaccatcggggtgaaggttttctctacatcgggtagcaacgtttgccaatattgatagactattcac  
cgggtaccaaaacatttgattgtcttttggatgagcatgagacagcagcaacgattagtaattcttgaggtaaacgatgacagcttgaaaaa  
gctcaaaaacttgatttctgagtaagctgctcttcaaaaactgctcttgagacttcagaactgactcgtctttaaagtccatcaataggaatat  
tcaacattcgatttgcaaatagatcgggctccctaattcccaggaatgcatgatttcataatagtggtcgtatcaagcgtataagcagcactaa  
atagaagagcaaaaacttctgaaaagattccgattcatggacatacaatccatgatctaaaaatcacgactgaggctgctgactactttccgca  
caactatattacctggatgaggatcgcaatgcacttcttattaaacatttgaaaagaaaggaaatatacaagactactgaggatttgctttt  
actgaaaccagcatctgacaatgcttgggttgaagggaatcccataatccactctgtaatacataatctttctctgagagtttctgtaaaa  
cctttggaactgacttttctctcaaaaatctgtttgattatggcttcacgactgtagcagctcgggttcaacgatgaaattacttccg  
accgaagtcttctgaaacatagtcaccgtgaagtataagggaatggaatatccattgtcgtaaacatacatcatacatctatagaccaata  
aatcccagttcatttctggaacggatgggttttgaccttgacggctacttctctcgaaggaagaatagcctcgtgacttgagctatgcta  
gactcgcagaagcgtttttcaattgtagcaaaaacttctctgctggcatgttattgagtttgatgatctcagatacttcatccatctatct  
gtggagcgtcatcaaacattccctgaaactctccgtatacaggaggaagattagaagattgattgcgacgatttgccccatttaatgtaa  
gaccgcaattttggataccatattccaagcgtgagcaactcgctcatgtaaggcctcaattcgatcagctctctgctcattgaagtttagcttg  
taatccaatgcaacaatggttctgtatacgggtccgaataactccgagcaaaagcttggcgttatagatctgcccacgtaaatcctgttc  
caatactcccacagactagctcttgggtccaactgaacgttcttaaagcttcttggtaggggctcttctgtatcaaacgacgagagga  
tctcgcagcataacattcaaaagcttacattatgagatgtaaacggtgaacgaattcctatccgagtaaacattccaaaactcgtgaccaag  
ctaagactatagctttgaaaattattcacttctcgtcaatgggaatgggaattcacgataatataagctcgtaaatggaatcaaaaatccttt  
acttttcttctgttgctaccagcttttggaccagaatatgcaatccggtgaagtttgttaatgcaatttaactcttactggcttattttacggg  
tataaattcttactccttacattcgcagtgtaatttcttctgttctgaagttgatgaagcgttctactcaacctgcatttccaatgaacatctc  
ccatgatagaacgtaaccaatccagtagcatgttactcttattcaaaaagcataaaaattagacataatgtgatataggaagcaaaaatcttgg  
tgctagaattatgagtcagttaaaaatgaataaaatttgatgaacaaactcacttttcaatcaagtccttctgtgtttacaaggcgaaaaac  
aaagtcaggcgacataaaaagtgctgactttacaagtttcttaggtgcaagccaacgagattttttattcttaaatgttcatgtattttctta  
ttaatatattaatgtacctagtgattttattcttcatattacttctgaatatattgtttgacactgtacgagatggtagttgatcaatttttaaaaga  
gggagcaaaactatcgaataacgagcaataaaaacgaaaaagcagaaaaaaagaaatagaatggtattttaataaaaaaatcgaccgc  
ctttgtcgattactttctattcgattaacattatacagatatcacagaacatgattatcgttgaatagggtagggcaaatccaaagacagtcacga  
aaaggtctatatttggatttccgaactacagctatgcaaaagacacttgagctgaaacgatcgttgtgaaagcaatctaacgaaacacta  
cgtttctttcagctttagggaaagtccccggactcttgcgttgggttctttgaaaccaggacaagcggaaacgctgacctaagaaccag  
cggttcaatggaatgttgcctgtaggctgcttcttattttctgtaacctttctatgtgctttcgttccggaaacggagtagacaaaagat  
ataagctatgaaatgtgcataggaaagtttgaggaaagcaaaacggatgcttgcgggacttacggttcattgaaactgtttttctgctg  
aggcgatagttatagatcacatccaccagtagatgtaactcaatgggcttagtcatgggctcagaggatttttgcctctttttgaaaggttg  
agtgttctcttgttaagagagcttctgattcaagccaaacctgcataagatagttaaagcttagaaggtatggatccaaaatgatgatcaa  
caatacaaaagagtcaagcactgaagtacgaaacgtactgttggagttattcggctgattttggaatatattccataggtctgtgcttggtagat

ataaagtacatagatgaatgtatatgtttatttacttagcattcttttgttccatatggagcttaagaaggagggtttatttagcagagctataaaatg  
tttttaaatgtaagagtcgcttattacagctctatgggcacttggaaatatacactaaaaccgaatgttggtggctttggctaaactgtttacatttt  
gcattcctggtgttttagttatgcgtgtttgtgacttttggaggaccccataaaggcctttgatgtttatggcaatgtagcggtcgcatctctc  
ctttatcgacttctcactttaagctgatttttttgttttcttttttttttttttttttttttttttttttttttttttttttttttttttttttt  
ttagatgccctatttatcacacatatctgcatgagatcttctctagtgacttgcctgttttctgagtgcttctgtcattttctctcgttctgaaagct  
gttctaatacagctcatatgcaaccaactttacgtatcagagaaatgttagcaattctgatcacctgaagaacacatgcaaacgctttatcaaa  
gaattgtaacgccttttggatgtttgtatgtgtatctctgtgacagttgcgatctaggctgtccagattgcgactgtgaagatccaacagttg  
aaattgcatatgctgatattgacatacaaaaagaaactcatttttactcctgaactctctaccctggatccctagatctgcaaggttaggatta  
ggtagattgagcttccggattattatgatattcaaaatcgtttacgcaaggttctctcagtagtgtttccatgcattcagtggtactacttaaaa  
agtagctatgaattggatgagctggtttttttatgccagacaaaatatacactttacacaacgaatacatgcgctcaggaaaatgtgaattat  
tacttaaaagtcatcgtagctgtttaaactctctgtgaatatctcgtgccggccgattccaatctcggttttgattcatcatgtgatctattca  
gttttaccaccagaaatcaagaatctctttggattgtctgagcattatctctcaaatatgactttgctcactactaaactactaaagcttgcctt  
acaaaacagactaggatgtatcgcgatgtatcttataaccgaatgatattatgctctcaagcaagaataattgggtgccgttacacgttc  
aaatttctaagctatctccagcttccggttacggttatgctgagagcagcttccatgatgattatgcggtttgaagcaatgctgcattctgctcct  
gaagctgacattggctggttatctatgatgactgtataggaataacggctcatgcttttctattcatatgtatgaacacaaaggatgcagtttt  
tgaaggaaaggtccagaatccgctcttttctgtataactgatgctgttctattaaaaaagattcttttattcagggttttacgacttttgc  
ccaattactctggacttgtgcaaatgctgacaatactacacagaaaaagatctggatgattatctcaattcatcctctgcgtaaccaaaaaac  
aatcgctaccctgagctattttcgacggtccaacagtagcatttgaacaaagcaggacgcatttaacttctcagattctaccaaggactca  
tctgaggatcatactcaaaaataaatcgttaacataccatgcgtctcatagtagttaaactttttattcaaacggttttgcggcactttttat  
gaaataatattagacttacactatgaataaaacacaaaaagtaaaactctgtgaaatttttaactaaatacatatgaaatcggtgaatttc  
atatcgatgaaatctcagctaaacatataggttaactgaaatgtctagcaactgtgatataagtcataagactcaaaaaattgctaagcgaa  
aagaaattaacagaatttgaacacaaagctcaactcgaattactgttcatctaatcttaattcatgcagtatatagaagtcgttattctcaca  
caaaaatattatcgatcgaggaaatataattatcgcatcactgggtcccagacattgatgtagtcctcattgttggcgacaaccaaaactgctt  
gaaggtatgacatcgggtaatccagagaaaacggtggatattggcggtatgaagacactggcagagagcaaaaaattgactaaaaacctttaga  
agctcagctccgaggagcaaaagttgtccgctctatggaagacttctcagcgtaaagatcttttagttcagaaattgcaggtatgttgaatag  
tttagaaaagatacgaatagggttgaatattgacttggatatttggtagcaaggaagaaagtaacttgcattctggtgactatgcattgaataa  
gctggttaaggcgtctgatccggcataacctgcatagggaaagaaatccatccccggagacaattcctcacagggtcgcagtttctggctctccc  
tcaaaaagaaccatcgattcacatgaagcggcaacggattcagcacctagtgaaagtcagtagtcgagagaatcattgtccagcatttgcataa  
cattgatgatgaaaaataaataatgataagaagcaagatgagtaagaacgctgatgctacgttacgtataagcagcttgcgctgctgctcata  
atgaatcttgcgattattaataaaggctgaaagactcacctgcaggtgtcgttttgaatcactttgttctgaaactatataatagtttt  
ggctcatctgacaatgtacaccggccttcttatccatcactagatggtatatacagatattttctcctttactacttctcgtactcttttttttt  
ttgcgtaaaaaatgcttttaccgttccattgaattttttcttgaattatatttttagtttaattgggtatgtgaatgctttgaaactttggaatgg  
acagtgagttaaagacgagcagttttagatagtagtaccgttactatcttctgatgagactttactcttatgttacacaatagaatttggttt  
atgcaacgtaaaatactatcacctcaggtattgtgaaatgttcatagaattagaataaatacaatataagctgataatgctaccaattcagaacc  
gacttgggtcataggtcgtgcaactgttcatagtcacattaaatataatatacatgtgtaggatgaaagatactttttcatcttcttagttcatgt  
tggtagtaattaaggtcattccttctgttaattttcaaatcattccctacaaaccgtttaagttctttcattttctcaagaaaatcacggtactgt  
aagatcgtctcagatctcctggagagtgataggtcaaagtaaggagagcagaacacatttcatcctccgacccaaagcgttgcgaataaggt  
gagtagcagcatttccatctacaaccgtaacgttttgtgaaaccatttaattgattaaacgacttgggtgatgtattctcagaagcatgatttct  
gcgaattcgaatcaatcattggccaactaactcagctgctcgtcactagacattgtgtccataagccatcggaagccataataagaattta  
tgtttttagaatcgactttattgtttccactcaggaacagctgttacgtacggcggttttacaggaatagggacagcggaagaaagtaactctt  
atgcaaacgttacttacttctcgggaccatttaaatcttcatcaccaaactataaagttagttagaatcataataaagctcatgctgaacaac  
ttacggctcgagaaggcattaatcgcccaagtatacggttgttgcgtaaaacaatttccggggtgttcaacttcaaacgagcagcttcatctg  
gattcgcgctgtttggtcacgacttaaaaggaacagcttcaaatccaccggaagttcgttctccaatacagctcgcgagtcaccggtcagg  
caactgaagagttttgactttgcagaatagcagtcagaagggcgcaagatccagaatagctggttaacagtaagctagctgcattctgtaat  
gatttgggttttttaatacacttgaacatgctcatgtacgatgcgatccaaactctggaatgcgtcgcaaaagatcgtcgtacttaagt  
gtgaaggacagccttactttccctcactttcaatgctgtttcccttagctcatcaactacggctggaactaaatgttgacgcaagatcatagaagt  
attccagccagagtgaccatcaaaaacaccccaaaagtaccaattccatcatcagatctccttgaaccgactctacatgatcatcctcacaagg  
atcattactggcacttgataaagctgatctggcgatgccatctcattcacaataaacagcttttggaaattctcgaactgcttgaatgctttc

actatccttggcggcaagcgaaccttgaaggatatgggtaaaccgtattgggtgatctagttgaatggcattctgttcacgtagctggatgttg  
cataaccgctgaagaaataattgcagcagtaattgagatgtccttagagagcagatgctttagccgactttgaggtaaaatacccatttct  
ggatgaatatccttagttcaactggtagaggactgaccattatatcagtcagttatataagaaatctacgagatttactaaggaacgcagt  
agtaaacaacaatagatgaagtaattggatacactgttgaatgactcgttttcatagagcgaataaaaagaacgaattattcgttagaaatg  
aatcattcattcgcataatcctgaaatgctctacctaaggaatggaaacgctcatgttaattggatattgagtgagcatagaagcaaatatcaa  
atgaatccctcattatgtattaggagacaaaaaacgaaattcagactgtagtatacggcatgaggtggtaagcactcctgtgggatttgaaag  
tgagaccaagtgcagccgcacacatagaaaagagcggtagcaggaagctagtagagttgattttagtcagtacatcgcttaaaaccttct  
gaaaagcagaatattcaggattaggaaatggcttaactttgtattgaatagagcctcaacaccttgagcaaggtcttgaagaacaagtatca  
gatattgtaacgcagccagctgtttgaaagctcaagctgatggtgtccttagagattcattgggacgacaatgagaggtttctgggacgca  
aggattgcaggatactcctgcggcatgcgaaataacaatagaagacgactcaatatatgttcaattcagggtcatagtcfaatccagat  
atagagattccttcgatagggcttgagtcgcaaaagcctccttccatttcaaacgaaatcagttgagtgattccatgttgaacagctggt  
attgtacattgacgtgtaaaacaccgaaacaagttcatcaaatctggtagaacgcagtaacaaaggcttcatgtctatttctcattcactac  
taaatagtataaatctttacagtaagtaagcaaacgcagtcgctgactattacggtaaatgaaaacgactcgagaaggagaaccgaaattt  
aaaaaattgatttctttgaaaggaaaaaaccttttacacagaatgtttctgcttttcttccgttctatgtgggaaaagatgcgacaact  
ctgatggtagtaacaaagtaagcatttctttcataggaaagctcaaatgaatgtggataaaaaaaaaaagtttctgtagctgttcca  
gaagaattgctgttagcaaaagctgaaagaagtggtatctttcattaaaaactataactaatagctagcgttagcttacaacagaaacaaactt  
aaaagttatttcatataccaccacggcaagtaacctgtctgttcacaagttctaagcgtcatgaagacaattcgtttacagtgctattttagt  
aattccaaaaccacaagacgcagaaacagatgcaagaaagaattgcaacaaaagataacctctgcaattttctgtagctgtcttttcaa  
agtcggcttagctgattggctgaccttatacatgcaatgctattctgcagatgctgtatcttaaaagcatacctaaccaagtcgctggaatacat  
cctataatggggttcatgtaatatgaccattcatcctttacaacaccttcttggatcctgttatataactcattcctgtaatgaaacaagcga  
attggtaacttaactgcaatcgtatcccaaccgaaaagaagaagaagagaggatctcgaatgttcaacgaagaatgcccttctcatcca  
aatttagatgctaattcaacacaactaagagctagatcttctactgtatagcacagaaagaattcgtttctcctagttgatttctcagg  
gaatgctgaaatccgttaattgtatgaatgtacaagaaattatacttacagctctacgtacgtccgatcaaaaaatattcagtggaacaaactg  
gaatttgttgaatattgctccaacttagaaatagctacagcactccttactttatagatcagaaaaggagcaactgttgatagtcagctc  
ttcgcataatataatctgctggtagctgcagcggtaaaacctagctacctgcaccgaagtagaaaatttcaaccataaccaacacccaaaa  
aagttggtgtgaatcgcagttctcagaagtaaaagaaagacaaaggcattcaattcaacctaaagattgtctcatcatctttcgggtgaaagt  
gcttctcgtaggccatctccactaaaggcaatcgcaggctctgtgagtaaaagggaaatcaatgtgatttcttggctggaggactcctaactc  
aatatttcccttccgtaagatgggctctgaaattccttctatcggttctgggtctggtgctgaaaacgagggcaattgtcagatttctgtct  
caatggattccgaagatcaagatgacttacccttctgtcgtttgcaatacggaaaaggctctggttgctcaattgacaagcttttgaagga  
acatacccaaatgattcactcccctcttatgccaactgggacattttgcttactaccgtaataaccaaggctggacatgtccttctgatgctta  
tgaaccgtggagacagatattctgtggagaagtacaccttcccctcgtctttaggctatgctcctatgggcttgaacgctgtctcagtggaat  
ggataagaacggaatgttgcctgaatccttagaagaaatttaataaattggaagggtggaacaaacctcgttttatacactatccctagtg  
tcaaaatcccactggtagcattgtcagtagaacgaaaagagaaatataatgccttgcagcaacatgactttataatcattgaagacgaac  
cttattattatctcaaatggcagagatcagggaaaacctgaggctgtgatcccaagttacaatgaagagttcgtcaataatctgatcacatc  
tttcttacattgatgtcagcggctgtgtcattcgcaggttcttcaaagttgtgtcctggttctcgtgtggttgatcaccgctcaacct  
tgttcatcagcgtagcttctgctataaccgagactgcttctcaaatgcttccggtatctcaagccatgttgatgccttgttcaagacctggga  
catgatggatacctcgcaggttgaacatattcgttattcttactgaacgtcgaatgctctactctatgctatggataagcacttccaagtc  
tatctgttctacattgccctgaagccggcatgttattgggtcaggttgacaagtcggcgtaacagtttctgaccaaaggaagagcatcgc  
gaaattgagtcagatattcatgaggaagcaattcaagatggtgtaattgttgcctcggtaattggttgggtgattctcaatcaatgacaaga  
tcttttccgtgtcaccttctgctatgctgagctcccagtttgagactgctatagaacgttttctaatgtttgagaagtttttaagtctaaatg  
tatattaaatctgctcagttttagtattctgaggatgatagttactcattataattgatgatccgcattttcttttctttttaaataca  
aagctactttctataaaaattcatatgtttattgatgtatatcaatacatccaagctataaaactacaactcattgtaattcaataaactcatt  
tacagtaagatcttaacagtcacatagatgatcagtaagatgttcatattcatctcataagattaaaatatttcttagatagaaaagcactatct  
atcctcaaaggatgatttcttcaaacgacggcgtatgcaacaaattgatcaaatctcgtattgtcataatattcaaaaataatgaaaagt  
aaattcgcactcctatattcagggtataagtaacattatgaggtttacaaggtgaaatttccaccggggcgttgaatccataacagactaac  
ggaagaaagcctggacgaaataaatacaagacattatcctcagagttcataagttatttctcagttcctagcagcaagtttgcagtaattcctt  
ttctcgttcatcaagttcgggttaaaccaagcaaggctatcaatcatgctttgcttcatcagcacgaatcaattcagcaatcctattgctataata  
ctgcttcaactctagggtgtcctaattaggcttctgctgttttctcaatccatgtaataacggatcggctagcagtatccaatctgcttacc



ctccattcctacaccatcgtttaaggcaacattgtgattcttctggcctaataccaggaataagctgcatcaatctctgttgggagtaatgctcatc  
caaacgtcttcttagacgccagtagaagaagcgtctagcattggccactttaaagggttgacgaataacttcttagcaaccatacgaaccaacgcg  
atcatgcaaatcagcaaatggaatgtaatttggataaataggcattatctttgctcacgttccatcaattgcaccttgactgaagaaagctca  
tctgggttcaaattctttggtaagttatcctgtaaagtagcatattgctcatcgcatctgcgattaatgaaagaagcttttcacgtctaaactg  
atactgaccattccttcaggtccaatacaccagctctgcttctcatcagcatacatctccatttgctgttataatggtagggtcaacaaccacc  
caagaccaccacgaagttcactgaaaggggtatgtatacaatacaggtgcttgtatcccgcgagagcgtcaacaatataagagccatatt  
aaggacttcattgaacatatcccgttgaccaccggagaaaccacgccaattagcagagataaataatggtaattgttcaccatgggttaaactcatt  
aatggcttgagcagcttaaaagcagaattaggataccagactgtccagcttccattaggcttctgctctgtagagcttgggttgctggatcagca  
ggtaaagtgtttcgaatagtagagtttcaacggcaataacaccagttggattccacctaaacgtgcccagccgacgacaaccgtcttagccat  
ccatcaaagtcttggatgaactttgtcaaataaacatacaggaacaaatctcatcctctttccatcaattaaccagcggagatcataac  
cgcttggctgggataatactcgacatcacgatcccagggatcatttggggcgatataaggacaggggttattacgttgtcagggataaagaa  
agccagttgacgatcttagaaattccgtcgaatcatctgggcagtcagtgagaaataccgttctatgcataactgagtaaccaccagttgta  
agtagaattatagacttcacgtcctaataccttattgagagcaggagcaccgtgaagaatgataggctgaccttccactgacagctcttggcc  
aaggcgaacgagatagccaataccaacggcagggcaagttacaagtgtgcaagtgaagatacaccataagctcgagatgtaaccaccagc  
aattaaccagatcctcctcaaacattcaacaccgagcttccaccagaacaaatgatgggtggatcttgaacgaacttaccagattcagttc  
aacttttcagtttcaatagcttagacttcttcttgcattccttgaacttcaggagttatataaaatattcgaatcctttctcggtgtaacg  
gctgttccaagctatattgaataagggaatcaattcatctgcaaccaatacgggcaccagaattggcagccaagtagagctgggaacac  
cacgttgacgggaaagttcagttaccttaaaaaagaagttgtcctcagaggtccgaacgagccaatttggatgtaatatcattggccacaatg  
atcatttttaccattaggatactcaggagcttggcggttactgaccaagcaaccataccacaagagttagctcctgggtcagactaacttctg  
taaatcaccctttcatcctcaaccaactcctacaatacaaatgtcttggataggattctcggatcaccttggcaaatcttccagcaat  
cgctaaaagcagcagaaataactcagggaatcatatacgaacgttgtaccatcaattgtcctttagcagcagaggtgaaagccattctttat  
ttggataaggcgtgtaatacgtctaagatgcatggagccaggtggccaatgctttgaaatccaagagttatttcagcttctacttctgataa  
agttcaatatttacgacaaatccagacacgttagatattattacgcgaaggggaaagagtagtaggttaggatcggtgcaaaataacgaat  
ttcagcagcgttacagcaagcgcataaacgacgtccgaatcgctcaaaaatccgcctaaagcagcttgcactgttgggggcaagtcaa  
aagcaggaaggaattgataaagatagattaagatcagtttctcagggtaattacctcaagagcatcaagaatgcttattcaacgggtga  
gtttcagataaagatactcagcgggtgggatctcgacgaagccttccaggacgtacaagagctctagtaaagaatcgcttactgtattcatgt  
tcttagctgttgacggtaaacatgaatattgtgattgtcaataaaacaggctcgatatgaaattagagagctacctaattccaattggaaag  
caaagcgggtctatgtgacgaattcgttcatcttcaacgtaacgaaccgactgatgctcaaaactatctgaggaagcgcgataagtgaaat  
gatggatgggcccacttattatgtcttccaccaatcactgtaattctcggacgttatgttctaacaatcatcctggaattctcttagaattgagcta  
agcctgtccacgatagcggatcttcaaggtcattagtagatgtcagagcaacatttaaacattagtagtcttgaagaggagcagtagaagg  
gtcatcactgttcaacgtcaatccgcatgaaataattacgcgaaagaggcaaacgctcgatggccagagcaaaattgggttccaactgatcaa  
agttctcagccgaacaacagcaccaaaacggaaaggttccgaatcattctgtttacataccaagaaagatcactataagattgaagacgtttg  
ttttcattttcaaagaaggagagccactgctgggaagaagaccatttgcaccactggcacttggcctgggtgactactagcacgaagctggaat  
ttcaaagaagcagcaaggtgtaccactctcaacatgatagtttaattctaaaacggcatatgctcgataagctctacgcacatacacttcaag  
agcagctaaagaaccatggatcgggatgacagaagaagcaggtaaaacatcgaaaacggtatacttagagtaaatgagctcctttaaata  
atcaagattaggagcagatgagaaaacttagaatcaccataatgactctcgacaactgaggtttcaagatatttccatttgggaaaaccgct  
ccgaaagcgaaggcatagcgcagaaatcagtaattcacgagccttaagagatacttggcagtagcttggatcgagatctgtcaattttcta  
aaatattcattgaagtataatgaaacaaaagtagaggttccgattttataagatcaagcacagttataagaaggttattcttagaacggatacga  
gaatgagacaaggcaagagcaatgactttatcaacgttatccttgtatcgccgaaggcgaaggtaacatcttctcttcttggtaggacctg  
aaaacaagcgtcaacgttataatactcctcaagatactttgacaacattatattcgtgcacttttagaccgtttataatcattgataacatca  
atcaaggagcaatttctgttttaactgttgggtcaaagatagtttctgacctcacagtagcttgaagagccatttctagctgttggcaggaa  
attcagttctgcccgtcttattttcaataatgaaacaaataacttatctaacacgggcccagcagcactaaccaatgcagaataatgagagc  
tccactcactaaatggcagttcaggtacgcagaactcaataatctccttatatgtagtgaagaattattgattgtcataacccttcaaata  
taagcaagatggataacaattgatgataacgttggcaaggttaccagcaatttgggatcaccaaagttaggtagctgaccgttaaaggg  
aagtgcagtttaacacggctagggtcatcaaagtaaggataccaaggtgtcacctgaaccaacagaggcaccgggtgttttataattgca  
caatacatcctcagtggtactaatggcataatcattttcataacctgacttcagcataagcttaccggccttaatatgttccgggttcaacc  
aagaaacgaaccaacttaccggagaggagtagcaggtgagttggatcattttccgttctagcatacatgacatgttatctatagagattcgt  
gtaccggttaacctcatccctataatagacagtagtaagactgaccatttagcaacacaagtaaccaccatcagttaatgagcgaactctcgggt

acaacgggagccatttaagaatagatgataggaacctggagaagagcgagaggctgtaacctgtaacgattaccgtcgtaaataaactctata  
tcataaacatttttagaaaatcacgagaaggaactggccacgttccaaataagatttaaaggcacgatattgttcttcgcaattgcatgagca  
cgaaccagggcaccgcaaacaactgtaagcatcttatcaggacgggcagaagtacttttgagcgataagttgtctaaccaagcgggtgtaaa  
ttcattatgagcaaacaccagctcaagtagacgaaccaaatattcaacgggtgtcctaaaaatcaccacgaatagacaattccttcaaggctac  
aatcatagacttacgcgttgctcacggttatctgcaaaagcgaagatgtggccaaattgggaatcggcgaattcatgaataccacctgcggtac  
cgacgggagaataaccccagacatcgctggaagaacggaatttaagtctctaatacaccgctggaaggcttaaaaccttcaccgggatcctc  
gaggtatacgaacgcatacaatgacctttggagtgggcattttttgatttatgggattctggttttcaaaagcaaaatcaatctcgggtc  
cgctatcacgggtagaccgtaaagttcacgaatgtggggaatcgatttaaaggaataccatagcaattgaaagttgagcggcgggtaagtt  
acgccgaaaccatttcgggtgtagggtgttcaactgtaaacgaggggtcaattcaaggaaataaaatattatcatttcagggtcataaagatac  
tcaatggtaccagcagacgcataaccaacaagttcacccaaacgaacggcagcgcgctccatctcacggaaagtactaggaggagcgcaggtg  
acaggggcttctcaataatctttgatgacgacgctgaactgagcaatcacggccaaatacggaaatgttattgacctgactgatcggctaggatt  
tggactccaagtgcagggctgaccagcaagcttcatcacaatacaggagagccagggagttcggctaaaacctgttgataagcgtgtgtga  
actgctgagaggaagagactgacgaatacccttaccaccacccttcggacgccttaatcatgacgggatccaatttctcggcgatagca  
acaccatcctcagcggattgatacagccctttgataaatgtcgtcatgactgttacaatgttggttcgggttcgatcggacttttccaggcc  
caaacctgaccagggcatacaaggaccttcgactttgagccacaatggttgagctaattttgtcacccaaactacgcatagcactaccagggg  
gaccgataaaaaacaatttttgttgctagcggccaacattctggaagttggggttttcggaagcatgacccaaccgccaacggcatgga  
ccttcatgctctgcaacatcaacgatgagttccacgtttgcatagttgttattttgaaccgccaaggaacttccacgtactggtcggccatacga  
atagtagcggcgttaccctcaaatcatcgggtagcatgacgggtgaatctgatagctctttcattattaacgtttcataagcccattttcggat  
gcttcgaatctttcagcagcgatacattattagcaatataatagacgtgattacggatgtccaccacgtgaagcaatataatctttcacc  
ttgctggaaggtgcaaaatctaggaatgcctcctacagacaaggttagtactgaaaaaatgaaaaattacttttcgaaagaatctatgatagtt  
tgaataaacgccaggaactcaatgtcaatgctatgctttacgataaaacaaaattagtcatattctgaaaagtctctgacaacgcgaaa  
atattagcagcactcccacatatgtgtggagaatacaaatcgcacgttaaatttcgaaaagcaagctgaaaaaacagataatgagattgttg  
tttaatagaaaaaaataacgacatttggttctcggccttattctcgtacaagaatggatcaaacgacagatttcgacttgaaggagaa  
aaaaaagaatagaacatgaaaagtaattctttacataaccagaaaatgggaggctatacggggagccatagtttaagtctacgggaaaaga  
gacgtggaagggaaatggttctttattgcttggaggagcaaacccgagtaagaatctcctcctacagaaaggttcggagttacc  
gttcccagcagtagcgttgacattgaatacaaggagcttttaaaaaaaactaagaataatataatgtatttaaatatgtatcttatggaat  
agaacgaatcatacaatttttaatgtatatctaccagatgcggccggcatagacgagttatccgtgactgggacgcgaaacgatagtcaatg  
attggaggaggaaaaaggggggtttacccttagataactttgtctcaaggagaatggacgcatcatgaagattgtaattgtaacaaacaaaa  
aaagaaaagttaaagcaaacaggaatcaattcctgtcttctagtgaacagccttaaatggaactttctctagttcttcaaatcgtttcctaat  
gtgatttatagttctggatgcctttattttaggttaccattcaatctgctatggccgactgagtgccaccacatgaactaccttcccacattc  
tctcttttgaaggattccaccagtgatggaacttacttacgaaccagacgtgctaccactcccactggttagtaggaaagcatgtgacttc  
acgttgttacctaaccgagcaaatgaaaattcaaggtcgtactcgaaatatgaagtgcataattgggcataaagcttttcttatttctcga  
aaaaaagtaggttcggagtgagaaattaagcgttattatggcttttttcgaaaggaactcgcgaaactgaacaccgaggttttaagaagta  
ggcgtattcgttgacaagttgcatgacaaggggaatccatggagaagaaggattctttgaaaaaagcgccctagacgggatctatgaagg  
cgataacatttctttgttacgtctttggctttataaagtaactatctgataaaacagcctcgttactgttttggattcgtatcgtatgataata  
tactctgccagacgtatatcatctgtagttcatagatacgtaaaatagactcatagaataaacgactttgagttttggttcgaacagttgac  
ttcattgctaatacattggcgaataatgtaaccaacatgtataccaatttaccctcctgtttacgaactggccttttttatattagccagtcag  
ccaacaagactcagaatggaattgcttagatcatcgaaccttcagggttttttttgggtttgatataattccatattattcttaattttgctgac  
gtgtctttgttacttggttttaatatctgattatagtaatacagtttcaatcttctgttagctcccttcttactaaaaggttctacttgaattg  
aaagtattaaatagcaacattgctaaaaaacgtagcctaccgtaagaactataattcttgcgaaaagtgtgtaataatcgtccttaagtag  
cgactctgacaactggactttgacttatcttccatttggcacttctttttatcttattccataaaattacaaaatggcaaacgctgctcaaaa  
aaaactagcattgcaaaacaagcgaattctaattgttcatgctcgtggccgatgactgtcaacttcttattcgtcttgcctttttctcgtagt  
cctctttcaagtttccaaactcttataatcttctgctcgggctcctcgggttctacattaccagctttaccgtcggccgctcccaaatcagatt  
ctaaaggcctctgctgtacgtgggaggatccttacagcagggtgttacaatcgtacatgattgattatgtacttttctggattgtaattttcc  
tttctccctgacttctaccaagtttttgccttatttctgtagtgcacaacatgactctccgctctattttgctttactaacacacttttaggttcc  
catctttgttgatataaagcctttctttgttacgtatgggacttgagcaattcaaaaatcaggaaccaaggctcaatgacctgcctcctcgg  
tacaggaagcctactgtagtaggccttttcaaacgtcaagaaaagctccgcaaaaagtcgacaagtagcattctggtgattttcaatg  
cttagttctttaagaacctttctgtaattatcatagacggtctaggtcaacacatcaagagattctgtaagttacatttctcaaaagtaacg

atacaagtttcttcttcttatacttctttcgcaaatataaataaacaiaaaaaataaaaaataaataatcatttaacaaatcacctgg  
aatcattacaatcatcaatctgcagcagctgtccgtacttgcaggatcactcacaatatacttctgtctcacaacagcttgaacag  
cactcaatggccactgtctaggatatacgaagcattatgtctgtacttttgattctcgatgcaatcattttgaaaaatccgtttccaagatca  
acacattaggtgcagttgatggtagagcgtgctgtagcaaccatagactcgatgctgtaatgcatactacacgctttacaatagcatccaga  
acagcagtaactattcgactaccaccgcttgcctcaatcacaattcgaatcacctgtttgttgcataataatcgtaggagcggcagaagagacg  
ggacgcttgtaggttcaatatagttccatggagatggagcacaataatgcatttgaagaccctggaatagagaatcatccatttcatcatta  
aaaaccattccagtaacaggatccatcaactgcgacccaaagtacaaattcacggtggatgtaagagaaccgcataaccttcatcatccttgac  
agcaatgtgtgttccgtggtgacaggaatatcgtatgaggattataatgtcccacgaatatgttttgcatagagatatcttctacgtacgt  
ccgatgcaaacctttcgacatcattgtgaaataagaggcaaatcttgaataaagtccgggtcaccaactgggtgctccagaagacaacc  
atttcatcgctcaacgtgcaagtatactttgtaaaagataagaagaagaatccatggggaatccatctaataatattagcttcaattaa  
agctggcccactggcgaagaggacatgtgagaacatcagccctataggttctcaatggcatcagatacactggaaaatattgttcaa  
aatcttcttattataatgcctccacgcttctggataaaggcaaccatcaaatcagctaaagacctttataaaaacggttcaacaccttcttggc  
gataatctcaaggttttgaaaaggcaggacgacgattatcaccagccttaataaccttccataaggagcaataacagaagcccaactg  
ggtcattaatcaggtcttagtagtatcatccagcaagcaggttccattgcccgttactgtaaatccttccctgcaagcttgatacttggctcga  
caatttgagccactcaagctgtccataatgatccccatgatataaaccggcctaattccggggaacgccaatggatagagcccaaccgg  
gctagcataggtttccgtcaacatatgcttgaggcattagcgggacattcacgaaaataatggagcagctgtatcattggcagctga  
ataagcataaaacctcctccactagaccgctagaacaaaattacagtaccaatacaaaagagtagaagccaccgctccacccgattcc  
cgccattgctaggatgtctatgccaatgtagacatcaacgacttctgtcgcgacagcgcctgacttctttaactttatgtcctgtaaattga  
cccgggggatgaagaggaggttaaatgcataaaggaatacagcagagctaagatcccagttccgaatattagcagtgcgacatgacgtatc  
ttaaactgaaaatatcgatttgacgagcgcgatgtatttctccagtcagagtcagttgttgtcaatacgaactcagtcattcagcaacg  
gagttgaattgacaaatagacataaagtagagaatgatccgtgttactaaagatctgaacgaagaataaagacaatgaaatgaaata  
aacaagatattaggaagtagaaagattgtcaagcggcaagaaaaggttcaatgactttccgaacactgatttggctcagagagagattgtcg  
cgcttttaggtttcagattgagtttctactgaatcctaacgttgaaggacccgaaaaatgaatcacgagaaacgagacctttctttagg  
gaacctacttctattgtgacgattagatcctgagcaattcaggttaacaaaaatcacgaagcctttaccgctcaaacgctcaa  
gactaacaacaacttgaagaattatataagaaaagactgttaaacactataagtctcagcaaatcaatggaatgattaggaagagctttg  
cgagaagagtgggtctgtacttaactgtaatgcgtacggatgcactttgttcttctcctgctacacgcaaacagcaaaagaggagata  
ccattctatctcaaacagtagtgagttctcaaggagtaatatagactagttctttggaagctgtaattagttattggcttttggctatcatt  
tggtttctttgtgaaataaaagtgaaggagggaacgccttgttacactgaaagaccggttgaagaaaaagctacttttagacta  
acaaactctgattgtgtgttatttggagttcttacaataagcaaaatagaaaactggatctttaccagttctttctctgctgcgagcta  
catcattatcttttttttagaaaagtggtgataccttattgttattgaaatgcagaagctcatttggtagatggtgaaccttgcattccg  
caactgaaatagcagacctggaccagttacggctctgaaacctgctctttcaggacagtgacacatggcaatggagatttcgctgtcctcc  
ccttcaggttggtagcattacaagcatttggcagaaaagcttattcgatcctcatgaaatgcaaggtagcatatactctgcccgtcctta  
ccttggcttttggcttatgagcagttcctcacttcttcgagctcttattatcaaaaattgatgaaatgggtgaattctctttagagcattc  
ttattggtgtagcatgctggcgtgcaaacgctcgcagtcagtaacatgaggtccaatggaactgcgctttcaaaaaccggtttatttaata  
tctgtggtttttacagttcacttgggttccgttgcgaaatccagaaaaggggattgaaaggcttactgaacattgtccataatgat  
gccgatgcatgcttcttcttcttcttgggttagtacgagctggttggtagtatgaaacatttaggtatcgtagctgttactactgaactt  
gtgatgacgaaactgggaaatcgtaaaatcagttcatgcatgataagagatgccaagaaggaatagacatgtaacctactggttaataactt  
tccatatcatgctgcatcacctaatcttctttagatacttgatcctttagatgtcccttcttctgtccttaataaccatttccgcatacga  
tggtcctataaattgctgatgttctgtctcattatctaaaataaaaatactacactactaatacctaaggttatctggaiaaatacaaaac  
aaaaactcttcaacaaataactacaacgattgtttatgactgttaataataaaaaacataaccgagcatttacttaagttagatagg  
tgacttactatttcttgggttgaacaaactctgcatactcctaacaagataataatcagatatcacaiaaataaaaaaaagcttact  
aattttcttggtttctgaagaattcgaacatatctatttattatgtagtagtataatacaagtcatgcccagttacctttcacactc  
tcttttttctttcaaaataacagcttccaataagatataaattataataatacactgcttccagttcgaacattatcaacgttattaa  
cagaatgatagtaatgtaatgaggaaactcgcaatgatcaataacttcaaaaataagagttcccgaatccagtaatccatgttcaaaactc  
gcgttcaaggtaagtttttacttttacaacaggagcaatcattcgaaaatgcttttcaacacttcttggtagcagcattctcatctcagat  
tgattcgtttataatgccttccgaaggactgcgctgctcaaaagatgcttctgctcctccataaagggtctctccttaacttccgaaattcc  
gagtttagtagtttcccggtagctttttatgagaatccataaaccttgggtctgatgactgggaaagcctgatccttaataacttagagtg  
tgacatgcaaacctggcttctgtagacatcgatattgtctgcttaaaatcaaaactgggtgaaggtagcggcaggcctacttccgctcgtgta

tgcccactttgtgtctatctcttttcgacaaaagcaatgataaagcactatctcgataagaagaagtatgatgagggttaggagagcgcttaaaa  
aagaaaggaggagtattggcttcttcatcttccgacacccatgcatcttcatcgctactctttgagtaaatcttccactttctgctagtacacctgtt  
ttacttagaagcaccagaatatctttagaaaatagcttcatcatcgtttagaaaacatagaagaagactgtgagtggtttttgacagaatag  
gcaccttaagataaaaaagggatgatgttctttacatcaggtatttgcttataaaatccggcattatgatcttgaagtgacggctttgtctgtt  
ggatgatgaaggagtgttttgaatgcttgggttaaatccatgaataacgctagttgattactgggtgtcacagttacttttagcaatttttctg  
ttcagcttcttggcttagcagccgacgacagaatcgtaattgatttagcctttgactgactctggaaggggaacaggttttgaaatgctt  
tctttgtgtatattcgtttgcaaaaatagaagcagaaggaatcattttaccagaacatgcatcgttttgacgttctggcatggaagaagtagaat  
acggttactaacagttatagcacaagtcggtcgttttgacggttgaagattcattcgggttcttgggtggaatcggacgtttgtaagcagac  
gaagaatcttttctgaacgttttcaaacgacttcaagggttcttcaaggagaaaaatgatgagataagttgattaatgatccgaagaa  
agtagacgggaactgggacgtcgtgtgtggcgatgcaagaagttgagttcgatgaatctttggattagctcgcacggaagattcctggctt  
ccggaattagtagttgaatttagcggatagtgatgattgctattaggggagtaaatagaggcaccagcatcggaatctgcagatgaagctat  
agaatcacaactgctagaaagatctgggagagaatattccatgcatcattggagtttgcgccatggctagtcagcgttccacgataccaaa  
gccgcatgaaagatttcaagcagcagaccattttagatcttggcgcatcttgggtgaagactaaaaacagataagtaatatagagcatct  
gttaaaaaattaccattccatgcatgagctcaaatgtctggtcagattcctaatttgcataatcttctgctccaaggatagcattggattcg  
aacagagtacttttctgcatattgtatagtaaaggaggagaataatcttatgtgaagcaataaagggaagaatactagtaaaggtaaaagat  
ataagtaagaataggccaatgaacgaaaaatgataaaaaatgaaagacgtaaaaaatggtacagaaaagagagcgttctaatttaataaaa  
actgtgtgaaactcagataggaactgacgattgcttgatgattaccaactgagttatttctggtatccaaacttctgagattaataaaaat  
gggtttccaatgtagtcagccaaagtcacaaaaatactaaaagcagatgaagcatataaagaaaaatcacggcataggttgcctttctcgcag  
cgcgtgtacaaaaagctccacggccgattcaaaagtgccgattcaaaaatgaatgtgcaacgtgtaaatgatttaaaaaagctttagaacgca  
caataaaagaaaagctcgttcaaaagatgatgtccaaaaaatgcaatggttaaattgaagaatacaatcgttctgacagcaaaaagatcgtta  
aattcaacttttagctgaacttaacgacaaacagcctacttagctcaaaaaataaatgcttttagcaaatctctgaaattagcgttggttctt  
gtccgttgcggcatcctgagggtatatctataaaacactaaacaaacatgttacttcatatcgttagattgcgttatccctcggtaagaaaac  
attccggtccagcaaggttagaaaattatattgataaaaaacggcatttttagagaaaagtgcttagaaggaatcttgaatattttcgcggaga  
ttttttcaattaaaaacaaaagaagcccggttgaaggtaatgattcattaaaaatcgatgatgaaaaactgttcaactgattcgtttgtt  
tacataaatgtgtcatagacaaagggctgaaatgttattgtattagctgggtgaatgcctttcttctaataattttaataaagcttaaaaa  
ataacaattaaaatagaaatggaagatagtagaaacggatgtgagagctgattgctccggctatttcttggtagcgaagctcatgtgaaat  
gaatatattcttgttctagaaaaaaaggttaggaatttttgttactttattgaatttatagataaaatcaattgctccttataactagaatgg  
aatcctttgatttaaaaggaaatattcgttagcatagctgctgaggctcagaaccattgaatctggttgactaatgtttctaccgctatacct  
aaacgaaaacatcagtttctgctcagaccagtgatgtacatctgagggccttgtggggatccaggccgctgtagacttttctgattatactttg  
ttttcacaatagctccttattattgtctacggcaactgatatactttattatacattttgagctttagtttcaatgttattcatttcaaaactcaa  
agagtttttttagtcaaccgaacacctttaaagccatccacgcatcattcttaattgtactcatcgtctttagaacggcaacaattatgctg  
ttaccttcaaaaccattctgcaaagttgagtcgcaaaaagtaattgctgcttcttccaataaggggtcaataacgaattgctcctcatgttattg  
ttcctgtatgaagacaatcgatacccaatgagagttgtttctttaaactgacgctttaaaccggtcaaggcttgcagtagaggataaacac  
tattttcagccaggccaaaggaacagatccaaagcatctgcaaaagcagcatagaatattgatcaatgccaggaatttttctgcttctgat  
tgactccaaggaacatgagacttctgagcaccacctccatacacaacggttatcacgaatcaagttacgtacaacgcacaaagcatcatg  
aagagcgtttcgttctgcaacaatcatttactaccagcacaacaaatggtcacagcagagattcgcacactgttctgattactaaaat  
cttatcacgagtagtgcaaaaagcaacttcacgaacaaaccggccttaccgagctttcagtagaaagatcttgaagcaggaacaatacgtc  
catttagcaatggcaattaactcaatctctggtccaccacccaacgtacggcaggaagatcattctgcaaaagtaaatgattagcttcatcat  
cgaatccccactgacaaaatacaagatttctcagcatctttcacgttttgatcatatcttgaacttttcttctcatatttctgtagagcttcaa  
ctcactgaccgatgtgatgtccaacttatgttggcttgggctgggaggtcaaaaggacatgttaaaatagcaagttttgcatcctctatagat  
ggggcatttaggggtgagacataccttatcgacgacaacacctttgacaagtgtatcatccagaaagcgaacaccttccgtctactttaa  
caactcaaaatccacatctttacgtcaaaaatcagcaacagaaaggaccgcatcagcggcaattctggcaagtgatcgtgggtttcgatatca  
ctttacttcaaaactagctttgagcagcaggaacaaatgtggatccaatttatcaaaagtaacaacgtcgatattgaatcaaatgctaac  
agaatgttggcaagcttttgaatccatcagcaattcgaataggatgaatacctttgtcaataagaacctcagcttctcaacaaggcaccagc  
caactacaacaccagtggtaccgtcaccgatttctgtatctgagattttgataactgaaccaataactggcgatttgggtctcaacttccatt  
ggtcaaaaatagtagccatcgttctgactgtaatatctccatccgggaaatcaaaatttatccaaaccagaggtccaaagatgtacgg  
acaatattggcaacagttttgtagcaaggatgtgactttgacggcatcaatcccgtgcaatctttcttctctctgatcgcgaactaaaataaa  
gggatttccgtgcatcgcggaccataacagcattgtctaagtttgacatgattcttaataatacaaaacatcttttagcgggttctttgagccac

tttaggatacacgtttcctttcactttctgctttgactctccacagaagggtctcaaattaaaccacgctaaaattaacgggattttctattca  
aggatttaataaacgtccttaagatgataattgaattcgagaaagcaaatggttagtggtgaagttgaacttcgtctcatcgtcccagttact  
atgtgagcagaactcagtaaatagcgtatatgattgacttcgctaaaccaatggttgaggacggaatcctatccaaaaagtgaaagtgaattc  
cttaaaaaatgaaaaataaaaattagtgatctaacgtaaaaatgtgtgctgaagccgctaaggaatccgcccctctgatcttagttatacaataat  
atcatgcttgaggagaaatgtgattcaaatgtgcaatgtaagtaaggactttaaaagtaattagatatcattaactacctacaaagtctgaagc  
cacatcctcttgatattcatctatacaagtaaatggttttttttcttaatgcgtacacactggtttacttgtgtgatgtaacgtcgttgctgtaa  
caagagttgtatagaatacaatagtatgttaaatgcgtaacacagtgcaacacaaactagcgagcgtcatggaaagctagacatggcatctaa  
gacgtttccaacaacaaaacttaggcaatggaagtaaaaccagaaatcgattattccaacaagttgacgaattaaaggaatctaggtgcc  
gtagcactgtagatattgaagggtgagagaatattgctttttctgtttattaacagaatgtaggacagttccttgaaaaagcttctaact  
ttgaaaaacaagtcgctcaagcttcggacgcaatcactaataactaaagtattatgtttcattgcggatctttataccatgctcgcgatttccatgg  
cctgaatgagcagctggttaaactgtctaaaaagcatggccagctaaagcagtcgaatgacgagcttgttcaacatgtaattgaattattgccac  
tattgaagacctaagattaaaatagacttgattgagactttacgaacaatcacagatggaaaaattatgtagaagtcgaaagagctcgtctca  
ctcagctttgtcacagatcaaagaagagcatggtgatcaaggctgcgcaggaaatttatgtaatgaacccgtcgaacatacggctctctag  
accagaaagaaaaggttggtttatactcgaccaagtcgactgttctattacgttctgattattatagggcatctactttcactaaaaagatcaa  
cataaaattttcgaaaaagaagaagttcaatcactgaaactcaaatactgaacaaaaaattcgattgggttcacgacgatgcttatcttga  
tgtttgcaaaactaccgtgccgtctatgatactgctgttcaagaggaccagaaaaatggaaggagatttagagaacgtcgtctgtttgtc  
ttattgagcccctatgacaacgagcaagccgacttgcttcatcgtattaacgccgatcataaactgaattctctcctttgcttcaacaattggtgaa  
gtgtttacagttaatgaattaatgcgttggcctaaaatctccgaaattacggttctgttttgagaaacactcctgttttcgccgaaaatgacgaaa  
agggcgagaaaacgctggtctgaattgcgcaagcgtgttattgaacacaatatacgtacaattgccaaatactacgcttctgatcgaatgtgatcgtt  
taggtgttcttttgacatgagctccgaggaacccaatattttgtctgatctcatcaccaaacatcaatttatgctcgtattgatcgtcctgcc  
aagtaatcacgtttaagaacctaagaatggtcatgagcaacttaacgaatggggtccaatatttctgctccttcaaaaaactagagaagacta  
ggcagttgatctaaaagaggaaatgatgattcgatacagcaggctgttgcaaaataagcgtttaaacagaaaagacgaaatgaagttggct  
cgtgccctttatgataatgacaaaattccataatgtttaacgtgcgtagaatgattcaataaaatattggttgatcaactttgatgttaacgat  
agtattattgtaattatttttctgacattatcaaagagcttgaattttggcttagtgagatccattattatcgtattttgcttcaagaacg  
tgtaactaagtaatatcatctacatattcattttggatcatcagcaactcgggatccaaaaagaaaaatacaggcaagcaacttttgcg  
gggcatccagcttttgccttcgaaacaaaaacaggcaactttgaaaaatacacagcggcttgacctggtacaatgttataagtagcaacgcca  
actatgcttctcgtcagaacaattttcagctgtgtaaaaagcaagagctgttctcctggtgaacccaaatttctcgtttgaggatacaactcca  
gtgaagatttctgcaatatctcattaaatgctactctatccgttagattccctacgtggaaccattctatcagaattcactctcttgatcggg  
attgacggttccgcttatcctgttttggaaacaaaacagcggtaagaggaaaccgatgcatatgttataccaagtactaagatagagagagca  
atcaaaataaataagttgtttggcgttgataatttaactcggattaactctatacctttgggaatagatcgttgttaattaatgaaccttcagta  
gtcctgaagaagaattgaatgattttgattcaacaagatcgctactgtaagatcgtctaccgaaaaagcatagcttggattggctcttag  
atagctcgaaggatccttggaaaggggaatttagagaagcagggtgtccttagcttcaagtcttatggaatgatgtgtgattccacactttg  
ggttttacctttatgggaaacggctcccaaaactgattttctgctatttggtaatatagttaccttgagacttaggcacgatgtgtgcacgaag  
ttgagcatcgtgatcgacacatcaacaattacatggccgtgacgctttaaaggatcgaattatacggggccagtttatagggctaggattaag  
ctcaaaatcggctcgcaataaatcctgttattttgaatagctttatagatcgaatgacgagctactccctttgtaagacgacatagctaaaat  
ttgatagagaatgtgatcttctcttagcttggaaactacatgcgagaaaaggaaagaaaaagaaatgttgtttgaagctacaaaactgttctc  
tcacaccgccctctatttgaacgggacaacgatctcgtgggacaaggagctagattcgggcatcaccgattgtttcctgtcttttctctgt  
ttagcaaaaacgacctagccctttgatggcattaaagccgttttgagccttgctcagtaagaattacgatacctccttgttaacaaaagacca  
aagcgcagtaaatatccaaaaatcctcttctgaaccacattcaaggagacgattagaagctataatcaatcgtactttccttttgggaaag  
cggcaatcgacctaaaattcaccattcatgtcccagaaccctgtgaggaattatattttagtgactgtttatgattcacgaaggaaatcgtt  
ttctcaacgacagctggtggagttgttgatgaaagaaagatcgaactcaaaatggcgcccaagcttggctctttccacagtccaaaacttcaa  
ttggtcgtcggttacccttcaaaagaccttctcactcgtaaaagatgtgatataaggaagcactactggtatggcatcgttcttcaaacgcca  
aaatttgataatctgtcattgtcttttagactcttcttcaaggagagataattggggttctacttcttctcctacgtttgtcgttttattagta  
ggtttttgattcgactttgtcagcattggctaagttcatccatatagagattgaaagcagatgaagatgcaaatcaccgattttttgctctt  
tcaaaagaaagttaaataaagtagaagattcacgtttcgagcatcactgtccaattgattcactgttcaacctgcgtggaatagcttctgatcg  
agagttaccccaattcgtcctgtcagctgcacaaggcgtgattttactgcaattttcaatttgataattgaattttagaatgacatcgagtaa  
accatctaaatgatacatatgagttttcataaataattgacaaaaaataatgctatggagatagggatgagcgcgtgttcgacta  
aatcgcattgttacttactataaggtaacgcttttaaaaaaatttggaaagaaaatcatttttgccttctgtttggttcttcttgttttcaataa

aaaaataaaagaattgacacgtggaaggatattcgcttgtttaaccaagtgttacactttggctcaaaaatgacaagtcgctgtaaaaa  
ggcgggtgcaaaaattcaaatatgaatattgtcattttctgttattctttattgaaaactgcaagtttggatgggtaaaacttttaaacactacc  
gcgttgcccatatctgttaaattttttttttttggcctgtttgttacgccatagcattggttcaccttgctcaagctgtacaattgacacaata  
tgttttattattttataattctataaccgagaagattcagatgaatcacagcgtaaaataaaagtcattaattcacttcattaatattacagtacc  
aatcaatgaatgtaaacaataaacaaccggaggaaaaacgcgtttctattgttttggcttagaaaaattggcaggaaagaaaaagatgaa  
aatggattcctttcatattgcttgaaccaattttctgcgctcgaatcgcgatcgagattttactaaaaccaaccatggagagtatttctact  
agttaccttacacatactccactttgaaaactttgcagaattctacaacgtacgtccaataggcaatgaaaaggaagcgcgtttccataagt  
ctcaggcaacggcaccattagacgatgaaacaaatcagcgcgatgcgattccagaaataattgagaatcaagttgattcacaagacattggaat  
tctctcgtatggttagactatcttgcgcccgaaggtaataactggccttaaaaaagtcattcaagaaggaaggcctccagtaaccttgattc  
actggaatagaaaagtaacctgtcaatccaactagaaaagaagctcagctctgaattcctttaaagtgaggcataaaattggagaaacc  
agagtcataccgcataagcctttgtacacagatccaacacactctgttctcaagaacctctactgaaggatctctatcattgtggagga  
aaaaaacaataaactacttaccctttggattgtttgtagacaattccacattaccttctactctacagcaatggaggcatactatagctaac  
aagatcccttctgtggcctattatagcgcagccgacttagctactattctggatattttgagaactgtgcttattggttggaatgattccttctgat  
gtacaggtgaagcaagttcagttattttcttcaaatacgcgaattattctataggagttctttgtaaacctcttatagtctcaatggttattttgtt  
ttgtgtgaaactccggatattttgaacggggaagatataccacattgaggtctgtttacgatcattacgaagtacacatactacctcccgtcc  
attcaaacatcagcatctactttgaacgctgttttggatttctgtatggcagaatgatctgctatagttttcctccctgacattattgctgaaggag  
tcgatacaaaacatatagtaacgcttagtatattatagatcgaactttaattattagtttagtcttttagtcgcaactaatcacgttttattactatgg  
gtttattttttatggaatcatttaacctttttgtccagcataggcgatttttcaataaaaatcaaaggaaaaagataataaacttaactttctat  
aacagctcgataatatttaaaacgtaattttcatgaacaatattttcatatatacactttacctcagtcgcaaaaaataaaaatccatggaa  
agcccgtctttagtagaggttctcaagtgcaagaaattgatgaattggcttaccatctataaaaatatttttcagtaagattagttaaaaat  
cttataactaagaagtcgtagtatttcacacatagacatcctagacagttgttacgtatttacaactccttagacgacattcattgtgtttgaaagt  
attttgaaatcgaagcctaaaaaatggaatgctacatcagttgaaaggaggttcagttaaagcagtgaaatctgtgaaagcgcaggag  
gcttctgcaatacattccggaagaagttaaatcggctgttcagctaaataaacattttagcaaaaatcttttgagcgtgaagattctgtat  
tcgaatgtgctccattcatattaacttttttttagtactgtctgccatactattttcaaaaataaaaacattgtcacatagtaacaggctgctaga  
gtgagagcaagttacaatgtcgaacataataatcagaaaatgaaggtcatcaagtcacccaagtccttctaaactttcgttcgaagattcta  
ctaaagctgaaaaggcctttgtccatactaaaactatgtttcaattggatcaaaagtttaacaagattcagatgggcttattacgttttattgctt  
tggttacgataccattctcaaatcctgttgatcatttataaagcaacgtctatttacgatactaaagattccaatcgaactccgagaaagcactt  
cgtttttatagccttcttatttctggacaattcagatgagcatattttatctctagtcgaagtccttagactggggcagacaaatgactatgccact  
caaatcaagaaaggaagagttgacttactgaacttgaccaccagagctttcagccgacaatacatcttccaaaagaatatttgtaaaatctg  
tggtcatagtataaaaatccagcagtttctactggcttctgttttctatccatgcattcagagctggctaaaagataatcccttcatatgccc  
ggtttcaaatgaaattggctcagaaaagaaaaatcttttggaggataatggataatataatgccgaaaggccatcacgtaacgaaataaaa  
ggtacctgatgtattcaagttactaattcttgaatcggaccaaagttttgagttttttgtaattcatcacttaataatagttaacgggctttg  
ttttacataaattcatgaatcatgtccagttttccttgaattcttctatccataataagttcaataagtgattgttcaacaattccgtagttacagca  
agcttctcagctagcaagcttaattgaacagtcgaatacgggtgaatcatttccaacaaaacctgacttctgatactatacaggattttatcaact  
actggcgaatgaattcatcttcatgatatctgcccgtgctcatgtagcttttccacctttaaatacagttttggatgcttccactaattta  
gtcatagcaaaagcgtgaggattttctgtacggctgagctcgggggaatcataaggattgattcagattcgcgatagcatattggataaaaca  
agatatttagcaccgaatacggccatagagccagcttcatcgaacttgaggattcaaaaaattgtttgagcttcagaccattgttctt  
cctgcatgtcatcttaccaccacattcgcgaataatgccataatttaggggtgaggattgcggttttaattctaaagagagctttggataactct  
tttaactgtttattatcctcgagactagagtaactttgtatttctagcgaataaagttccaacaaatgtgtctctattttgttctgtaacggcgggt  
tttctgtgaaagaaggagatgattgtcgtaaaagagacttaatttgacataattctttgcgaaaggaaaaatcgggctacgtcattaacg  
tttctagtttagctgttattttaaactgtgaagagcgtgagttgtaatttcataaaaaccttccaagaattgagcattgtagaagacgatgcat  
aatccacgatgttatatcgattttctgcataattttcgaataactcggccattctgcaactcaagcagtttctgatagtgcttttagcatctatga  
taaaaaataagttagcaaaagagcgttcatatgcaatgatgcatacctcatcaagctgatcagtaacacaatctttaaacctgctttaa  
agacttaaacgcctataaggttatttagcaaaaagagcgtagagataatcatagacatttaccattcatctttcggatttgattgtcgcagat  
ctcaaaaatgatctaacagccgaccagcatcatctttaaaggctaggttgaatttgaagagctgttcaacaaaataatattaccaaaaat  
aatctacctttgaattgtagtaagagttctcaatatccacgtccggcttcgaccatctcatcatcgtcatcctcaaattcgaactcataatcttcatca  
tcccttctttgttagtccgatttttaacactgaacagaatccactactctaacataaaaatcgtccgacattctatagttactactttggaattggt  
tggttccggtattcctctactattgatataatcatactagtaaaagacatagaaatgataagtaattcatgcatattagtaaaagaccaagagaa

acaatcctcagttatatgtgtatgaatggatatttagtaaagtaaagtaatatgcatatcgaaaagcgtcatttagcatatgtacccttcaatgtttg  
caaaaagaggcaaggttgagcgaattaacgagagattgtatgtgagcatatagaatcaaaagaaatttctatttctgttcaaaaaatccaaag  
gatctgtactatgcgaaaggtaaattgcaacaaaactcattccatttcgctcgactacagatgtttattaacgatacagataaacgtaattat  
taccgatgcacgctgctacatcctaaaagttaacaacgaactgtatggtaagggaaatcgtgactgtcttttacaccaacgaaacgtgaggctc  
tagtatgtaaaatatttctctcagccaaaggcctgacatttcaagaagcagcagcaaaaatgactaagggtaacatcttcgatgggtaaaaga  
ggcaataagtctcataccctcgtccgtcgttgcgaaagcgttcttccacaagcaaaaagcacttgtgcttctgtggttatccttcgctaaga  
cccgcagcttcaactggggtgctaaggccaagagaagaagactaccggtactggtcgtatgcaacatatgaagaaggttaccgtagctttac  
caacggtttccgtaagtgtatctgttagatggtcgaccgttctttactaatcaactatctaggtactggcaacaagcccgtactggatccaa  
ggtaatcccgtgcttcttctgttaaacttagtgcattcaggacattttcgggaagagggatccctgttgcgatgtacaattgtattctttgactg  
gatccgtttttattggcagttttgggagagaaatctaactgtgttctttcattttttaaagtactgttttaagtgttagatacatctgagtagcg  
gaagtccgatgataaagtaacaacattgggtgaaagcatgaactgaggaaaagtaaaaagcaacccattgctgagcacttacaggatgt  
agtttattcctttattgtatgttattgtattgagcagatctccattagaatcacattaataatgtcgggttgcattgaaaatctgataattgcttcat  
ctttttctttatctgcttgtttttatcgtttactgttagcttcttctgtttattcgtgttttaactattgaaaaccaagctagcatagattactgttatt  
acagtcgctctcatagattttattgtttacacctcttgctatctgaaagggtgattcatcattcaatagttgtatacacttatgacctcaagctttt  
cctttagaataaataagtaagaatcactcttccaatccggtttctcaatgccagataaaattcaaacatgtcggaaacattctcgtatggactc  
ggagcaagagtccttctctaacaagaaaaatattgactcgttttggcaaaagggcccaagcgttggctgaatcagcttctcagctgtaaa  
tgagcaatcaggtttatcactgaacaagagctcaaaaagtacaaggaattcttctcaactcaagtttcatatatgacaagaagcaaaaag  
aaagatattcagtgcaatccttgatgacctcctctgctagtcgagccagaagataatgaaaagctggagtctacgatcagagctgaaatttc  
gtttgaaacaacgaaaagacgaggttgaatcattaaagaaagaaattgtttctgagtgaatgaaattgctcaaaagtacgatgcaacattaa  
agaatccaaagaagcaaaaactattagccgaattgagaacattggaaaaagagctacaggactggaccaagataacctaattaagacgcc  
cattctccagacttagagaaaagattcctgtcttagaacaagagcttttgggtactgatgattcgataaagttaccaactcacagttggaaga  
gatgaagttcgcttagaccagctgaggaagaactgttcttactgaaaaagaatatagtcactcgcaccaacgttcaacctctacgtgaatct  
atggaaatgcgttctcctggagacgatgcaagagaaaggtcaagcatggatatacatctatgcttaattttagatcaataacttcttaacgc  
caaaagaacgaatcttttgatctattcacaatcttaactttttcttttgttatcattaatccctgttctgtcaggaaccagcggcgcaac  
gtcacgcattgaatagaataactgaggattaattttgaccattccatggatccatattcttttgcgttgcagaggtctttaaactttccggt  
gctggacactgaacatagcataatacaagagcttttctcacttggccaattgtcgggttaaggcaatcagttcatgccattcagattctgttttg  
ataatctcctatgcaaggaagtaataaaattgccaattctgcatgactgaacacagggcctctcttatagagaactaaaaaggttagaaaattc  
tattcattcaaaacaacgtacgataatccactgagaattttgttctcttttaccacctccctgttggcgaagtaataatgacagcaagctc  
tacaaggaatgtgttctggacgaatgtaattgctaggatcaagttgactgaaagaagtagcaggggaattcgttccaaatttccgtgatgaatcc  
tggggtttggcagtaagctggcaagacgtgaaagcaagagtagatgaaaaattatctgtccattaacaactagagttcctagagaagat  
agaaaaaatgcctcaggaatgtcaattgtaaattgctcaagttcgggcacaaaagtaactcagagggatttgagcagacaaagatgaagaa  
agaggttcggttaattcttttggagctcggcatcttcttgagataatctgggacttctctccacgttcaatacacaattgacgttcccgccacat  
tgttccctatgctcgttgcgtttaaactgtttcttggcaaccttcttgcagttatcttctcggccaccaagcttcatgaaacccaaaagac  
ctagcgtatcgtttgtcgaacgtgccacgttggctcacttctgaaagattcccttttcaaagaatccgcttgcagagctctttatacttctt  
gtctgtaccagacagcttaagtagcagctcactgaacattgtacagggattgtttagggtcctcgaaaataagtaataataataggg  
aatccaagtgataggatttgggaattataggaggcagcgggtggagctaatgaaatggaagaggactttatatttcatgcacctttgaca  
tctcgataaaatttagattactgatggatatttgaatttgaccagagtagcttaccctaccatagaattatgaattctttctataatccttaa  
ttaagactttcagttaattaagcattagttgacacagaatacctaaaaacaggattcgggtcctcatcaattgcgttggtaaatgctccacta  
tgcttcttcaattcagccaatatcgaaggtctgaatgaagcggcaatttcttttaattaagtctatatcttgaattttgatcatgaattcattg  
ctgatctctaaataccgattttccaaatttaataagaattgaataagtgatgctatgatagttatgactatattcagttcaaaaaaatata  
caggatttctgagttttaaactctatcacttactattacgaagcgtttgatttttatcgaagcaatcgtgtccaatatacttttctgcgattga  
aacatagacaattatgagtaattcgaatctgatagatcttcttatgattttgttgaattaaaaaaataatacatatatatatata  
tatatatagattatgaggcgtatcttggttccgttggttcaaatcctcgtcctgcacaagctcttggtataaatcatctttatagcttttctt  
tgctaccaggacattatcgtagctcctgctgtatactgggtcgttgaatgtttacacctttcttttggtaatggacgtgcatggctggcattgact  
tctgactctggacaattgtatgttgattgtgagattcactccgattgtaagctacatcgatggtttaggttccagggtattatcttctgactaa  
ctaccgggttctattaaatggtatgtgacattatctgaaaatagtagtaagctactatgcgggcgttggtagttgtgctaattgcttaggcttat  
tcattattctatcgaccaactattatcgtttattatccctaatgtgattaattctcgtttgtctttgagttgtaattttatcactcatggcgaca  
attcacttttcttccgcttggattgcaatttctgcttctcagacagccttataattgttcaagattggatcactccccattaccgtactgtccc

atttccgtcttctgcatccgctaatacttctctttcaagcagacacaatttagatttcttagaaattacagtatttgcgtcttctgttgaattgct  
agttttttacaatgtaaatgctgttatggcagatctacaatgatccaatttttttaggtacctgatgtgcctacaaaaatttgccttaattttataa  
agtttaacgtttatcttttaatactttctttaataggtaataatacttatttttattatctgggtgcaacaattcaagagggaaaatgaatagaagta  
acgtaataatcattcaagtcaattgcttttagtatttaattctgtaaaaaataatacaaaagtgtcccgaaaaagcggtaattcgtttgtttgt  
ttttttgtttatgtcgaagaagtctgataccactccaactgaacgaccataattccttacgctttggaaaagaaaaatggaagatatcattctt  
aaggatcgaacagatatagtaataatctcatctgttgcgcaaatgaagagtagcccttagctcgaattcaaactatgcgataaagaaca  
aacaaggaacaaaagttcagcagatacagaatattttcggacgctgaaacatcaagcaagaacttagcgaatcggatgttctttatctata  
tgaatgaaaacttcagcacggcaagagatacaaataccagcagtactatcttgactgaaaagaaatgtagaacagacagtttcggagggaaacg  
aaaaggactgtcagtgaaattcaacgcttaaaagaggcgaacgagcgtcttcagatgacattattacagatggtaaaagaaactctgattata  
tgtatatatttaacacaaaataggctatttcagacacagtttctgaaaaggagcaagaagagatgcaaatcattcgaaggagtaattcgtga  
agtaatgggaagcaacaaatcacgcatacttcagatggaagctgaaaataaagattaaaacagtcattcgagacatgcaggagtataaac  
aaaattagtagaccgctgtttacagaacaagtttgctcagcaaatcctttctatagatgaagcatgaattaagaatcataacctatacccgtctcc  
aatatgccaagaatataagtgatagagtttagacgttgagtaactctatcgggtggttgatattttccggaacataaataaacaactgagttctc  
ctttcaaaatacacctttcatattatgttttagtaactttggaaaagctcatcgtcaaatcttcagtaagcttaggaagattggaccatccacgactt  
acaagaaatgtccctgatggtttcaagccacgtaacgaaaaattaaggcagattgtgctagaacaaagattcatgtgatctttaacagtta  
agagctcacgatttcgcatggccaaataaggtgttttgaatacaaaattcaaaaccctgaaccattggaaacggacgatttaaatcacttata  
acaacatctgcacgtaattccttagcaaggattcctggtttccatggcgtctcatgctcaatagccaactgaagataaggcacggaggagggga  
tcaccgtactgtgcagatgcttctgtagtttctagcgcgagctcgttttaacttcatcttgaatagccataactcaggaaattcccctgatg  
gtgctacagttggcgggagatcttgagggaataatcaacagaaacaactcttcttcagagcctatgtgttgagaagcaacattattccatatt  
ccaggagaagatcccttgccatgtagtaagatgatcctttccaaaataaggtcttaacaaattaataacgagttgacctgggtgcaaacattttt  
ccttctctgtatctaaaccatttggttagctgtttatcaaatgaagctcctcaattgtgactaggtgaaatatttccctcaattttcgaagaaaat  
aataaaagaataaagattcagtagtgcaacaaacaattcagagcgaacgtatttattcaatcagtaattttcgaaaacttacacttt  
ccaaaaatttaaaatattcattttccaaagaagctctaaagagtagacagagcttttttccctattcttgcctcgtcgaatagaagcatttttcatt  
caaagtagggcacaattgccaatttcgtaacttctaccaagtagttttccagctatccagaaggctgttctcgaagatattcattttcatga  
agcattttactggtttctagatgtttgcttctgatcattgacagatttcaaatcgggtgactcgtcatagtaactttacgactatacaagtag  
ctcagtcagacaagcgaagaatcgaatcggagtcagtttgcataatgttttttataatgattatataactgaagaacaaaattcatat  
tggaggacatattgtgaagaagagcattggattgactcatcataaccatacttctacatgagctatcataagatatcaagcaattctatt  
cctaaatctttatcattcttttttaaaataatctaactcttgcctttttctattcattcccacattacttagaatgtttcattatcgttaattggtta  
tttattaacgcacaaaactgtatcgttatcgcgagcagtagaatcaccgacccgtaaacctttcgggtgacagctactccaaaatcaccgaa  
tacgcaacaagtctgatgtagtgtagcgcgacgtacgcagagccaatgaagttggcaaaattctactatttaaccctttttcgggtgca  
tgcttgcaaaaccagatttgaactctctgtgctgatgacaatgggattatcaatattgctggtagactttccagcgaattgctactgtaaaacag  
accatactacagttgactctttcagtggtgctggaacctgaactgtgaaattgtcggtagtcttcttcttattctttacactttcattttgct  
gacggttcagccttattgagcccgaattaaagcttttagctattcttacaattacaacacggccttgacagcggatccggtttgtatatgccgat  
tttgtaaaaaataggaattgtttgaacaggtacgggtctttacacttaaaataattcaatttggatttaacatgttttagttcgtatcgaagc  
gttcccaatttttgatttttaagcccaatactatagttcctatttcaggggatttgagcagtgaggtaagcaatctgagtcattcagcgttatgacg  
tcgttaaccattgttttagtttctgctgaaaagtggctgccttggtcgagagagaaaatggcaaaaggcggcccgatgtttatcgtcaagatcct  
gctaaaaaatatgctactctgcttcatctattctatcgggtgctgctcttttcttactagaaaaacgcttttgaaaatattcaccagcagaaaagt  
gtgggctgctcttagcattatctgttattacgttgagcagttgattcatgttactcgcacatccggttactccttacagtcaacgtggagcaaatgg  
tgaacacctttggtagccgatcccaacaatatcagttcggcgcagaagttcaggttgatcattgatctgtaagatcgaagccacagtggtt  
gatgagtttactgacctagtttagactgctttaactataagcaccatctttcttccgtgatagcaccaaaagtcgaggggtgcaaacgcaaaa  
ccctttttgctttttctggctaattgtattatggcttggtacagtttcttggactgtttccaaagaaagttgcagatgtatcctttcaacttttac  
tttaacgttcattatcgattgagatgaaggagatgaaaaagattaatctcatgattattcttaacgtacattcattaatcaagactatttcta  
aaaaatcatttacacttataatcgttaaacctaagaatcactgcgatggcataagcattatgtctttaaataagttactccatcgttaccttttcta  
cacgtttgaaaacactttactcactgtttcaatgtataccaagtaacgctcatgacggggataatttcaataaataactgaagatccccggaag  
aaaccaaaaaggccttcttctgtgtaaatgtcgtattgcatctgatatacttgagtagtgatagccaatgccaggtatccggttacttgaatct  
tcgtcgaagaacatcggctggaaatgcaaatgtttgagctatgaaccgctaaaccgctagagaaagtttcttaagctgttgagatctctacc  
agaaaacataactcttgcaccattcataagtgaaaaatacaatagatacatagggtagccacattaagtagtgcgtggaagaccactgtaaa  
atgcggaaatccctccttattgcgataaatagtcctaaagttgacataaggttaatgactgagcattgcaaccattgggtcatattatctttgatt



aaaccgccgctgaattgagagtcttgcttagcaatgtccagtgagataagtgctaataacacttgacgctcctgaaatggctccgaaattagt  
ctttataattactcaaatctttctatccgatttctgcaatgtgagttgctttaatccactgtaagttgcaactgaactgcgcgtaaggaaatgcc  
cttaagcaattcgttccattccacgaaaaaaccaagaatgccttcccgtttccatatttggcaactgtagcaaacatgctattatctttatta  
ctttgaactgaaaaatgatcttcatccgtccagaggactggttacagttactaagagatgctgctgtaccaccagacagtagacatacgata  
acgctttaagaaaactccagattcattagccgtatgtaatttaagatcttttccattacaattatctaaaatttctcagtagctattactaaagcat  
cgaccttcacaattcagccctaccctactatacgaaacagtcacaattcaatacacaacttttgagtgagaaatgatactacaccgagccaag  
atggtaagtttaaatgatattacgcttgaaggtacaaaagactaattcaattttagggtagctgacattgagagacaccacgtgagaaagtct  
caacgcagcaagcctgcctctgagaacgtgacttgaagcttttggttaaattatccgcttctggcccgcctgactgactcacgttcaacaaga  
ctatctaaagcgtctttcaatcaagactaacccctcctatctatctccaagattgctgcttgactagccgcaaggcctcaaccttgag  
ggcaagactattgttactgttggtaccgttaccgatgacgagcgtatgttgaccgtcccaagctctctgctgctctctgcttctcactaagtctg  
cgtgctgtagcttgaaggctgggtgagtgatgactcttgatcaactgctctccgtgccccactggcagcaaacactgttcttctggtgtag  
aaagcacgctcgtgaggcctccgtcactttggttcggctctcacaagcacaaggctcctcacgttctgctgagggccgtaagttgaaagagct  
cgtggctgtagaaagtctgcttcaaggtataagctttagtccccaaatcaatgcacaaaaagggttctttagtaagttagtggttgt  
agaaggattttgatttagtagctctgtgatgatcagcgaataacgaatgctgtgtatattccagtcagctggcaagtagtagagcttcca  
gtaaaacttttgaacattgaagagatttaagtttaagtggtcaatcaatcatttataataataactatgatcagtttacgaaacagtaaa  
cagaacactctgaaataaaaaacgagactatgaatgaaaaatacaaatcaaaatctgcatttttgaacaaaagggttaaaaaattattctt  
tttctgtttatttctcataaacatcattagacaccaatgtcagtttgaatatttatttcttctgacagatggaagggtacacgggtgaaagt  
cgagctgagggtcataattatattgataaaatgtgcctgtaggctgagctgcgatacaataaacagtgtagaagaggcacatttaaatgtgca  
atatcttctgcagggatccaagaaaaaagcattatgatttctgtatgactctatgtccaataactaaaacatgatgcttcatgcttctattt  
aacaataacgcttgaagccgataaataacatctaggttaacttaccaccagaaccgggatatctgtaatttagttatccaatgtctgagcttctg  
tactctgagggttagttatatttctcctgtagtattgtagtgcgcaataaccgaaacaaatctgtagcattcgatagccttgatcatat  
tgttcatcgcaaaatgctgagtttccatacttcttctcattgaagtccacactaaacggtttaattatcttttcttcttctcgggatcca  
attcaatagggtgtgatacggcgttctcagtcgaatagattattaagcttgaattatgcttcccttgaagacaaattaccatggttcata  
agattggattccctgtcacaataaataatcgaatcggcagctttgtttcaataaacattgtaaatcttctccgtattgtttacca  
agtttggttaatgaagcattacctctatacaccattgtgtatccaaggactctcgtgacgagtaacccatattgtctaggcgaagattaa  
agtttagcaagaagaaaactgcctgaccggcaaggaatcctgaatattaaggcaactacttttacctacatcgattacctgtatgtagcgt  
gatttagatcttctgaatttcaagcgttccatactttgttctgataatcgaacacgctcctgaaagtcttaaggacttctcaggatccat  
ttttatagctggaccaaaagattcattcgatgttggcagcaattaactgttctgattgcaaacagactcaatgaaaagggttagttcgtatgg  
aacattcttaagtgctgcacaatagccttcttggtagcagtagctattggtagcgtcgaataacacacaccattcttatttcaaaccaa  
tctagcaagcactcagtgattcattgccatgtctcgcgaatttagaagttcagggttgaaggtcaaaaaaggaagcatcatcatgccca  
tgaaaagcttgtttctctatgatttccgacattaaacgctttacaattatattggagccagttatagtagcactaattgttcacaatatac  
gtgccccgagcaggaagaccgaccattataactagtttctcctctgggaccacactcaccttctgaattggattagaataaacactcgatg  
tttggcccgtatactcattgttgaaccttttcttccatactttgagcaagcacaaggggagaaggtggagtagctatcaccgggtgaatggaact  
ggggacatgatgaagagaggcaggacgatactctgtgctgaaagaagagacttgccttggcattgcaaatcttccgaggccattcgttag  
gcttagctgaggatttaattgaaaaggaacaggagacgaatcgttagacgttaacaggatgattgggagaagtagatgttagggcgggg  
agggtcgtgtttcttttagtgaaacgtttgtctcacgggaagggcgacttgatcgagctgctgttctttgttaattgagatggttaatt  
tggaccgttaaatcttcaagtttgaaaactaggacttaagaaggcgaagatgtgggagactcatgcaaggaaggtgagctgactggggatt  
gacaagctgatcatcttgaagaagctggttccggtgactattgggttgcataatctacaataaaaggtagtgacaaaaaggatagc  
agtagtaaaacaagcaccaaatccccgaaagagaaaatgtaccgagcggattgtataatgcacataaaaaataagaataaaataagaga  
aagtggatgagaagagaaaaaagtttccaggccacaggctgggtttggaatgaattccaagagattgacaaaaatctattcaaatgaa  
gcaaaaaacaaaaaaagttgcgattcttaagcgtatgaaatagaatgattcttcttgcataaaccaaggaattcggaaaagaaatca  
gagcaattcaaaacactaaaagaatgaacctagcgaacgaacaatctataaatagcttcttcttacttggtagtgggttggtagaag  
ggcatatcttacgttgacatagtaaaaagacttgaggttaacaagaaggaacaagtctcaagaagaaggaatgacagcgcataatttcaac  
gtaaaaggaaggtggattactaaataggaatctctgcaaaaataatctctgtaagagaatggttaaaaaatccaagctggaatccaatgct  
ccaagaaaaagaaaagttcgttttgaatcaataagcaggaaacttaattatttatttatttatttatttatttatttatttatttatttatttatt  
atttatttatttatttatttatttatttatttatttatttatttatttatttatttatttatttatttatttatttatttatttatttatttatttatt  
acaatgcctctttgttttatttatttatttatttatttatttatttatttatttatttatttatttatttatttatttatttatttatttatttatt  
aagtgggtgtgttttctactatttcaattcatttcttgggttggactgtttatttatttatttatttatttatttatttatttatttatttatttatt

agtaaaaaataaaaaattcccttcttttttataactataatcctttgttttaacttgccctttcatgcttgcctgtttccctttctctttattcggttta  
ttctgggacacgggcataataactataaagtagtaatacaactatgagtgaaaaagtaaaggtaactatttggttaataaagtaactgaaagtg  
atagactattttttatagtaaagattcaattgcacctgcttgacttgacaatcagattaattgatgaaacaaatcaatcagctcatctcgaa  
ttcttccaagttgaaatttactggaacgcttagattatctgtagatagcgattccattctacgctagtaataacaaaaaaaaaaaaagaaaa  
tttaatgactcgtgaactatgaacgcacatgaaccaaagactttccgttgtttgtttggccagtaagtctgaaataacatatagtaattgtagg  
attgctctaacattttgctgaaatgactcaaaactaatacattccctaccaccggaagctgaaatcacctgccccgagaccattgaccgctatctt  
cggcaaggaaaaccaacaactatcgctaaactctgaggctgtccatagtgttttcagaaggagtcagttctgagaactgcttgattagactttga  
cttttcttaccatatccgttacaacaactcctgattgactgattcacggatggccctatggcctaactcagcaatccatcattttgtgaaactt  
caagagccgacttgctttcgctgttcagatattgttgggaaagccttccctccgtaataacttccaatattaatgatctttccgttttgggaaacat  
tcagagccatgctatctgcatgatgcaggcggcacgaatgtttgcatcaaaagtttggtataatctccaatcgcctatctataggtttggc  
tcagttaaatatctcgcttattgacaaggatagaatggggaaccaaagcttgaacagtggtatccataatatttactctagaacatca  
cgaaatagcttgaatcttaattgcatctgccaagtagcaaaagtctttattattttttaccactgttcagttgctgattgctgctgtca  
gagatgagaataagctactttaaccgcgacgtgcaaatctcagctattcctgctccaacacctcataaggcacctgtaacgattgccactt  
tacctggaggagagattgtttttagcccttccagatccacggtaatattagattaaaagttatgtaatattcatctaatataaaaaaacctt  
gtgaaactttgctgcaacaacaagtgtattctgtgctattttggcgtccgagtaaaacttaattgattaagtagcaggaatattgtccagctt  
gtgtattatgctcgattctttaaacttggcggcattcgctaatcaacaagtctagatcaccggtagtataatataatgtaaaaa  
aacctatcgtaacattgacagtgactctgacattagcagtgctacttcatgtttctatataacgataacgtaaaggtagctatataactgaa  
cgaagttgtgacgcttcttaaaccttgacttcaaaggtagtttccaccatacaaaattcgatcgaaaaagcgaatgataatggttggttcaa  
cgatagctaaagcatcatgatttggcacctaaaggaattcgggaagcgtttcacgaagtagctctcgggcttactgaaacctctgaaatgat  
acaagttatcttccgacacactcactgactttttacaacattagttattataggaattgaaaatccagttcatttactgaaatataag  
cttctaccaaagaagaaacgaagctttaaaccatttactcggctctgttacgaggcgaatcgttggtagcttggcatccttggat  
gtatcgtgggaggttaggtattctcctggcttctgctgctcttttctcgaaaacttggctggtcattggtagcggttctgctgtagtgaattta  
cgctgataaagccactgtgaagttgaggctgaacgctatggtaaatttgaccaaatgaaatcccaaaagcatccttggaaatatagggc  
gttactattacaaccaacaagtaggccccatctttgggtacatgggcaagcacttggcttaagtagtgcgctgcatctcgaatcgttac  
gatacctacccaacaaactgtacaggcaagaatgtacgcacagggtgtaccgtctgctccttttaggaaggtttatctgactgccgttgcca  
atcgtttggaacctcaaccaagagaaacttattctgacctaccaatcctaccagctgattccttccagtcgaagcaaaagaacgttatcc  
tggtagaattcaatgggaagtttagttgccaagaagaagagcgtctctgcaattgaaccttccctcgtgcccggcagctgctgcctccgcc  
aacgctccgaatctgcaaatgttttccaccgtaaaacaatagctgtttcgttccactccttttgagattttcttttccgacagctcttattct  
gatgaatttttctgcttcatcggattgtttctttttacgatccatttacttagctgcctcgatctccttttctatttaccctatcgttatccagt  
tctcgaagttctatggattctatgcgcgagattatgttttctcgaaaaaataatgtaataatgtttgtttgtattgtctgtaataataatc  
atcatttctgattgttacctttctttacgtaattgattgcaaatcttctgattgtaagtaactctatagtttgcctttgtctatgattgtaaaat  
gtaaatatataaaatcacgttttatacaaaaacaataaactttaaataaaaataaaataatagtagtaaatgtagtaaaagaaagaa  
tctaacttcaatattaacagatagctccaattctctgagactataaacaatccttccagtgagcagatagattgttgaaaaaccggaataa  
ggattggatccttttcttcatgactgaaggatgttatatcgtttactgaagaaggatggcccaacgcaaatcaccaggttttgagagcca  
tcaaatgttctgctgactgatttactcggataagagcgagaaaataaactagcagcccttgaattctcattcaagttttctggacataat  
cttgaaggacgcaagagaatcattcgtttcttgaagatacatatctgggatttcgataagtttctatgaactcactggaaaaacagaggtatgct  
tgtcgaacgaaagatgtgcttaattaatgcacaagcagaaaagggtccgaagctcgaagatccactgtgcaatgattctcgtaaagctcaatga  
gaatatccaggtgtttttgaaatgaacgacgaaacaatccttgacgttaataactttcgaattacagacatgctgctatgaaagcatccg  
gaggacgagaccaattttgaatgggggtactaaaagaaaagaagaagtattgtccgaaaagaatcctgcccggcagcttgcttcaatgaaat  
ccgcccgtcactgtccgatcgaattcaaaactaccactggtaacttcaattgccgaaaaggaagatatttgcgagatgagaaaagcgaagaa  
atatagcgaatttttggtaaaacttggggcttcaaaaacttagcagtgtagcagtagctacacgagacaaccaatctgaatgaaccacataaac  
agccttgcgtgtttgtgtaataatagtcctatgcatatgcttttacaaaaactcaggttaaggaaaggatattgcttcatgggcaaaaag  
acggcagtgtaatttctgctggcggaaacgagttcatgcttctatgatacaattttcaataatctctgctgaccccgagctaaaaggggtgta  
ggaatgctgttaacatacaatgactttgcatctgtacatgaatagagttgtgttacgaaaccaattgcgacagggttaattcttcaaaaatcct  
tgcttcatgataattgtcttgaatccttatccaattttggtaattaagttttctacgctcattatcgaaccccgagacaaaacagaagcgtt  
caaatcatcttccattcaaaaatctacagaatttttttataatgctttctgtatgaggtaaaagacctcgttctctcgttctcaggtgaaaag  
gaacaattcgttgatgagagaagtagtaattatactcctcagaacaggtatcatgagcagcattttgtcgttcaacgagttgaccactctgag  
taaggaagtcagtagcaatgccattgtcttaaggacagcctaaagattgcatccctaaatcccactttgtcttatgtgtgggcaatgctatcctta

gtgggggttatatagccttgggaagtggagtctcaaacccaaagtggatgaaggatggctgattatgtatgcataggagaccgaaaaaggaaa  
gtcatgctaagcagtaggaagaaagcataaataacccaaaagagtttcttggcaccctgaaatatgaatttttaagcaaaatgggcctcgt  
tgaattgaccattttcttctgcaatgcctgcggtgtctatatctgaattaccaagtcggttctcctggcaagcactcgtctctctacgaaaaatg  
actctttagattttggtagtttgacctttagtaattgaatcttcttccatagaatcctaggacataccttgaaccaatctgttaaatcgtcaacttc  
cacacctcgtgcgatttaagtgttccccgaacgagttgagtgagcacttagctttagttagcactgttacaagttaaatgtcgaaagt  
ccaggtcaattgagtgattgctcatcatcatgtcgaagggttcttattgaaacacgctgatactcgtagagccaactcaaattctacaagagt  
attaaacagagaaagaagaacatgggctcaaaacttaccgtcaaaagtcaacttccataaactcgaatgttctcctctggttcatccaaga  
gtgcagtttttcaacatttgcctgccccttggctccttctcgccttcatatccttcttcttctcctcggtaaaccaaacatggaattctgtacc  
atgtttaaatacagcagcctgcgatttctcgcagggtctgttggattctcagttccccgaataaccttagattcgttattcccatttccactacat  
atttctctttatgttttcttacttcttctcgcatagacttagatttctttatgtttcgcctcagtcacttcttctccttatgaccttgcagta  
tatagtaaattgatatactctgttaataaaaaatctgcattaaaagtatactagttaggaattattataagtaaatacttaattgtaatagaaa  
aaaaaaaaattttaatttctttatgcttcttcaactgaaagtcatacttcttatacttcttccaagaagaagagatacaaaaaaaaaaggacaa  
aacaagagaaacatcatacaaaagtcaatgattacgcttttcgagaaagataaaggaaggcatttccatgctttgtaaatttctaaat  
aactggagaggctttacatccgtagaaatcggatgttctttccatcatagctcagcaataattcatagctaagccaggtgcttaggatcaatgtgat  
acttttgaaggtagacgttaatacctcatggttaggaagagttatggctattcttggaaacttttcttctcgtagcattaaggggtgcttggctcat  
ttacttcaaatcaaaagcttctcgcagttggagaagattgcgagggctgaaaaatggaactgctcctcagagcaggtatctgagttgatcaatt  
tcgttctttaaatacaatgcaagcttctcaaaagaggaaggaactcagaattcagtgaaattgattgtttcacaagcttggcattttccgcttcc  
aaatagtcgatccgttctctaaagccaacagcagataatttcaacttctttagtggttcttcatgacaatcagtttctttaaaggataaagga  
tttcttttctcgttctttagcttcttcaagtcctgtatagctgacaaaatatacaaacgggtggcctatactcaaaattccatgtcgcgtag  
atcattcgaattcatcaatacaagactcttccaagaatacaatttctagagcagtttagtcaatgatctccgatgcatcttttctcacaataatct  
ttgagaaacaggatgcttttctttttaaanaacccaacctcagtttctttaaanaacacataaagaaataaaaaataagataataacc  
atcaagcatgcatgcttctgacttttctgagaatcacaacttgaanaatagacttctacggaaccccaactgctcaatccaagagcatacag  
cttctgtattccaatcgcaataatttcttctgtcatccgttagtattgtttacgcacgaagggtgatgagccagcaaaatccttcttccaaatct  
ccctttcatataggtccaacaaagaagaatacagaggtagtaaacagctacgggttgaataataaaaatgtaataagattatcaat  
ggaacgagttaaagagaccaatatttatatctccgctagaaatgtccgcgaaacctcactgttgttttgggtcattgtagtccaacgtaaa  
taaaaaatattactctcatattcaaaaggtagagatctggcaataaccggttactgttgggaccaataaaacttttcaattctttctt  
agtaaattaaggaatcactttcggttccgttctacttcttcttctgctgcaaaataaaaccattttagccatattgacttataatggcttagcg  
gaaaaggaaaaaagaacaatataagccatacgaanaatacattatattagctttatcattcagcttcttcttcttttattcattgcaat  
acttcttcttcttattgacatgaattgactgaataacgtattttgatcaaatccagatgcaaaataagatattaataacgacatgcaacgaaa  
ccttctctaccaatctgaagagtggaaaaaaggagttatttctgtaatttttctcggatcctttaaataccttattgaataagtacaaattga  
aatacttttccccgaaagaggtgtacttctcagcattggaattgtgttctgcatacgccttagtctttaaactttaccaccaccaaatccttga  
aaatcgaaggtccaaaaacagccattaggcttttcttagataattttagaacagtggtttgttttaaggacaacatggcttctttgggtg  
aattgtctttattgggtgagatactgtctcctcaaacgctgaaaaaaggatgaatatcgttccagtggtactgtggcttagagaacggacaag  
aatcttcatcgttcattgcagtacaaattgagaacatgggattgaaatctataactgaaaggaagagcgtctgtttgcatcttctcgcctgca  
aaaaactgttttcttgaagcctatgtacttacagagggaaattccattacatctggcctgtacatcttctgcacgaagtaagggagaatgg  
aagttgtaagctggaataataatgacctaaagagcatggtgaggtacgcttccgggattttaaataaacctgttttctatacactttattcc  
atcatctggacagctcgttctggtttttgtaattggagaaattcttcttctgatccagaagatgattgattcaaacctcgccttctataaagggaat  
gctactttggtgaaaacgggcagcgtctcaaacaggtgagaaggatattataagtaattcgacctcagaggataagctgcagctcgtggatgg  
aactggtaaagatcagtcgggagaagattgtcgccttctccctcagttcttctgactactacaataatttatctcctgtatgacttagcgttga  
aaagattaacagttttatagtgcttctctacgtcagaaaaacgcatacttttacgaagccaattgaaactagactcttacttctcctgccc  
atgttctgcttactaaaaactgtgaaaaggtattcggtttcttccaacagtggttcttctgattatgcttcaatgaatccaccagttcttacaactgga  
aaaatcgtttagttggagaatattccggcttctaatgtacatttaattcttgataaatttctgctgtacaacaaaaagccaggttctttag  
ggatttgacatattgtaacattcaggacgttctgactggtaattgatactactttcataacagtgaccataaataagaaccttcaaaagaag  
cagccttaagttaaatttactgtgtcggaaatatacactattacagaagaagactattgcatctgttccatttacgatccgctgtttagtctct  
tgcggacgccattggaagagaaaaatcaaagatcggtaaaatttaaaaaacccgaaactatagctgacggcgccttcaaaaatcaaaaag  
cagtgctcattgtcgaacaattataaagaatgtgcaactcaagatcattcttaagagatgagttgcatcaactccatacatatgtccaaaat  
caagacggtgaatcctttagttaaagttttgagtttggtaaggattcaagtcaaaactactaaccgaaagctgttaaaaaacaatagtg  
ttcttctattccgttctcctatcgaagatttcttcttcaacgaagagcaagacctagatcttctgttccggctaaagctactttaa

attatctttaagaaccgctgttcacttcttctattttaaggcttcatccttcgagatctctttcaattgtatctacaatttcaaaggaatcggc  
attattgcttttagagcgaactcttgatcttctgcttttgaggttggttgccataaagaaagcttagccaccatgaagacaaaacttttaaaa  
tcggtttattaagactctctcagttgactgtgtggaagcccaggaagcattgctgcttcttaggtcaggaagatttgattactattcaagcta  
atttgcgcttctattactggtaaaaaacatcagttccttgaatcttgatgtgaaatccttatttatgtgcttccattgtctggatgctatggcgct  
tgggtgattgctgctagtacggataattactactgctcaagaattatattcaggcttacaatcgaatcacttactcagcaatgtctcttg  
ctctccctgctgctctgaactcataaagcataagaagaaggctatagctgaaaaaactttgttcaccctaacctcaaccaaaggctgttga  
tgataaagccgacttagcaacactttgaagaaagatggcttggtgagcaaaagaacaagagctcgtggtagagagcttga  
tataactataggaagatacaattgagcgcctagaaatctaactagcaagctagtaaaaaaaatatagtgttaataattaggggtgatttg  
gaataaaatttgactgttattgggagaaacgtgggtgactggaaaaataaatacaatagagttacaaaacaatgaacttttattgattgactg  
tagggtagacaatcgattattgcatattggtttttaattggctgagaagttaaatgatataaagataagacaaaaacgaatgagat  
aaataattgtaaggataagatgtcaaaatataacataaaaagagctcaaaaaagaacgttaatgctctacgtactccaaaattgggtctcca  
atattcctaatttctggaatcgtacatttcagatcaaatccttggcaaggacaatttaaaaatctagatgttagatgaatttttttatcgggcgt  
acttttgaacattaatagaatgagatgtcgaacagaagattaaacttgcttcatagcttttgcatactcgcgagcctaactcagctgtaatttgt  
aaccaaacttagaatcacgtactgcttgttatttcttggctctcacaggaaatctataaatgatcgtatttctgctcctataaggataggt  
acagcagcttcaaaagttagttacagtcaattaaggaatcatgataagtccttaggtatcacagaacagatatagttgcgaaataaaccttt  
gtatttattatcattgaatacagttgtgacttacttattgaagccagagcttgacggaccatttctaattgaattcaggggtgattttcgggac  
aatcaaacataaacagaatagcaacagcatcattgcagaccataggaagcattatacaaaactcttggaccaccaaatcccaaatggaaa  
aggtaactctgtattccgaatgctaattgttttctcataaaataaacctataattagctgttagttatgcctatgaaagcttgattcgttta  
cctaactgttgacttttctcatcgaagatccttgaacgtatgtaacatcaacgaggttttcaattgaactatccccgatcttccaacttt  
atcgtaacattatttcttctgctcagccatttctgaaaagcagaagcccttgctcctaagcttgcaaaaagtaatacagatccagctcggg  
tcgttcaaaaatctactaaataaggagcagttttaaactctcgaattcacttgtaagttgtattttatgtaataatattctacagtttagct  
atataaggattgtctaattaaattataaataaataatcatctcgatttaattcatcttcttattgtaatatcattaatctcatataacatcaagactat  
tcaaatgtaacagtacaagatacactgtataagactagatttttctgaaactgctagtttagttatacaattttcaatccttttaattcattttcaac  
atthaagtagcttagagcataaggccttttgcagctcattgtctaaagccagaactccgggttgttgcaatttgccttcaaggaaatcactactct  
caaacgagcgcgaactaaatcaaggatatttccgaatcagtttttagtgactctcggtaactgcttttcagaatattttcaacggctctagta  
cgaggctcagctgtgaaatatactgatggactgacttctatcaatcttctaaaatggagatagaaagtaggttaataatattgttcatcctcaagt  
cctgttgaaataacctgcgtaaatatactattttttggactcctggaactccagcaagaataaaagattcaaaaacgagttgtctttgtag  
aagacaatcgtaactttatgttgaaaggtcccatctgtacagttcgtatgctattcgggtccaccacagattggagagtaaagcagatacaag  
atcattaataacttcttataatacttaggcttcttatttgcagtaaatattagctgcagcgttcttcgaaacgtggacatctgaaatcattta  
aatttatagatattcaagaaagttgtttctcagcattgtaccatttctgatgttgataagataggctaaaacgaagaatgcttaaggctgcattt  
taactcagaaggttttctgtgaaagctccagcaatttgggtataaataatagaatcttgaataaaagcaatccaagacattctgagacatg  
cagcctagcaaacacttccgtctccaaaatcgacatacagtagtcaaatgtttcggcagtatctgcttcaattgatttctgagaacattaata  
agagaagttactaaaagttcacgagaataagcatcgaatcatataatgtacataaggtctgaacgaagaattcatccttgggtccagtttcca  
actccaattgctgcagcttgagttatttcttatttaggtgaatttaattgattcgttaaagcttcaagtagctttgtatataagagaaggatcataa  
aattccatggaagcaacaaaacagatacagaatctctttggagtttctgactttgggttactaaatcgtaaaaatctttagaaatgctaa  
catctgcagataacattgaggtttgttcttaataatccaatcgtaaaagattcttccagggttttcaagagtagcttattatgaattcg  
ggaagagattcttctgcgagaatttggctatcaattcgaacagattcaatgaaacctggatcattgggaactcttattttgtaaaaatgaaa  
aggaaatccgataaaaatagctccgatatttcatcaaatattcaatcgggatctccaataggcaactatatttgcacgataacatcaggttca  
caaatccaagccaaacaaaatcagtcatttattttatcttctgttaatatgtaaggctcaattggaagtattactcgaataaacgtaa  
actgttgataacaagagacaagtcacttcttggcgtataggacacaacaggcaaaaatctttgtaatgcaattttttagtttcttttagcagat  
caaggctcagagactgtgaaaatatacagtcagggcattcgcagcttgaggcgagttggttctcatcaaatattttgctaaaactgaaatca  
cggcatacagaaatcagtagaaatgttctttaggtgaaataactgtttcagatagaaattgattaggagtacctgatacgtgatccaagtt  
tctgatgaaagaagttcaatattcgtgttagcatttccattttcattgcgaagaggttgggagcaacgcgtgcataatattcattgaagt  
atctgctgtaacggctttaaactaattcaagatatttattcttcagaagcagaaatgagaacggatgttattaagggttgagcttttcaaac  
attcaattttacattggaggagacgatcgagaatcaagttcacaatatcaagcttaactcttagttccaaggtcgcataattttggaaaggaatt  
caaaattgacattattccaataaaatgattatcaagcttatctgagaccgtccgaaaaatgagagatgctaaataaccaaaccaatttcaatcga  
caatgaagattttttgagaatttctgataataagcacataaagaaggaagagaatttgcgaaaattacatcaggtgtactagtcgaaagcagatg  
aaagctctgaaaattttcttctttaggctttaaattttctgatttccaacagaaatttgcgcaaaaataagtcgagaatccaattgcagaa

agcttgacgttatcttctctatcagacaaagctttgatgatatactctccaaaatcttcccataagacacttagcaattcaacgtgaaaagttattaa  
tgaggaggcaactgagatagcttctcgctaattaacctgacattgtcttcttcatcttctgacatacttccaaaatcatcgttctcatcaaagcttg  
gatacttcttcatcttccagcatctgaaacaatattaggggtcaaattgaacttttcttccagaacattcagaactctttgcatgtatttcaacaatt  
gggttttgatatttaccaaaagtgaaacggattcagaagtaattgcaactgtgctgaaagaattatgatcatctttaaataaattcaagatgaccg  
taagataacctggctgatgcagaaaaacttaatagataattctgtagtactacttgcagatgcaagtagtaactggtaagtaaaaggacggac  
gtatgaagattggaagtgatggtttaacctcagttgctcctcagaatggaaagaagtgtagttaaacactgctcaggtccatataatagataaa  
atacaaatacaattgatagactttttgatagcaggcagccttgagttcactatagtttgaataaccttgaaagacgcagatgcaacatca  
gttgacaaaactgaaagtgcgaagaatataattccaatgaatcattgcaattgataaaagactaaagactcctctgattcgttactttgagttt  
ctagatattaataatttttagttaaacttttgaacagtaaaaaaagtcaaatagattgtgcatcagattgagacagaatcatccacaatgca  
gcaatataattctttcataggaccttgaaaactcaattaacagtaggtcaattaggtgtccaatgtctgatcagaaaccttaagagacaataga  
gaaacacatcgcgacgttctgttgacctcaggagcaggatctttaaactgcaatcaacgttctgtaaaattttagtagagaatgattctgc  
aatacttgatcgtcttcttattgattcatttcccaagtcgctcaatgcatgtagcgttaagtccttatcagaacctgtctttagcaagaaagt  
aaataatagaagataactagatataacttcttctgtagatttttgaagcagctctatcctctgcatattgcttggataaaactttagaaaaag  
gccagtgaggtagcttctgtgctgagctgcttaatatcagcatttctagttgggcattcaaaaaagaaataggaaaaatataaaataaaa  
atgaataagtaagaactattgaaacattaatgctcctgtattcttacttataattttggatttcaacatatttctgatattctatgcttaatt  
aatatgctttagattaaaaagtaagcatattataatgcttttaaggatatttaagaatgaggaaatgttctccgctcatagaaaaataaata  
gaataagttatttattcagcttattgagcattgtaattctagtttctcataatagaggaagaaggtgcttattatgcaaaattggaatatttattc  
tttatatgctattcgtagaatacgaagtgcaattctctatagaacataaaactgagcttccaaggaaactcgaactgctatttagtagaagttta  
attcaataattcaggagcttttacctctggctaccttttaaaggaggaaaaactgatcaatatcgttttggcagctacatctttgttattactaa  
ataggagccttgttacattatcgatttttcttccggatcattctcgggttccaaacgtaagtaggaattgatgtcgaagcatcatggaagggt  
tggaatcagaaataactttaaaggtagcagagaagaagaagtgagggttatacatggaaaattacataagttaataaattagttcaaaaaaca  
tagttaataaatttagatgtataaactgatataattggttttatataagaagtgctctgatgaagtataagacgaacctctaccatgaacgat  
aagaaccagaagtggaacgtctcagggcacaacccctcagaagagtaagtgattattttttagggaaattcaattgagattgttattaac  
tgtaaattagtgacaaaaagcagaagatactgcgactgcaatccttcgcaaaaagaaaaaaccaattccttagtggtggatgatgccactaa  
cgatgacaattcagtgattacatttctcctaatactatggaactttgcagctttcagaggagataaccgttgcgttaaaggaaagagacggaa  
agacaccgttttgattgttctaactgacgatgatggaaagcgggtgtcccgcttaaccgtgtgtacgtagtaatttgcgtattcgtttgggag  
atgttgaacagttaatcctgcccggatcaagatgctgaacgcatttccgtattgcccctggccgacactgtcgaaggtctaccggttactt  
ttcagctatacttaaaccttatttctgtgaagcttatcgtcctatccgaaaaggcagcttgtttgttgcggggcagcatgcgcaagttgaatt  
caaggtttagatgtcgtccagacgagttggcattgtcagtaagataaccattattcactgggaggggtgaacccatcaatcgtgaagatgaag  
agagtagttggcagaggttggtatgatgatattgggtgatgcccgtcaaatggctcaaatccgtgagctggtgaactcccctcgtcatcct  
caattattcaaaagtataggtattaagccacctcgcggaattcttatgatggacctcctggtagtggtaaaactttaatggcccgtgctgtgctaa  
tgaaccgggtgccttcttctttaaataatggctcctgaaatcatgtccaaaatggctggtgaatccgagtcgaattacgaaaggcttttgaagaa  
gcagagaagaattgcctgccatttttattgacgaaatagattctatcgtcccaagcgtgaaaaaaccaaggagaagtagagcgcctgt  
cgtgtcctaatgttactcttatggatggatgaaagctcgtagcaatgctgttattggtgctaccaatcgtcccaattctatcgacctgctt  
gcgacgtttcggctgttctgatcgtgaagtagacgttggtattcctgatccactggtcgtttagaagttctcgtatccatacaagaacatgaag  
ctggcagatgacgttgacctgaacaaattgctccgagacacatggttacgttgggtcagattggcttcttgttccggaggccgctatgcaac  
agatccgcgaaaagatggacttgattgacttagatgaggatgaaatagatgccagggtttgaattcttctgtgttactatggaaaactcagat  
ttgcccttggatcggcaaccatctgcttgcgcgagactgttgggaagttcaaatgttcgctgggaggacattggcggttggaaagaagtcaa  
acgcgaattcgtgaaactgtacaaatgccctcatgtatccgaaaagttctacgctcgtgttaccacaagtaaggggtccttttcttggga  
cctcctggtactggtaaaactttattggcgaaggctattgccaatgagtgctcgtcccaactcatttcagttaaggacacgtaacttcttagtatgtg  
gttcggtgaatccgaatccaatgttcgtgacatttttgataaagcacgtgacgtgctcctgtgtagcttcttggatgaattagactctattgctaa  
gtctcgtggtgactgctggtgactcgtggtggtgacccgtgtggtgaaccaattgcttactgaaatggatggtgtaataagcaaaaagaatgtt  
tttgcattggtgccacaaacagaccggaccagattgatcctgctcttatcgtcctggtcgtttggatcaattgatttatgttcttctcctgacgag  
gaagctcgttccggtattttaaagaccaattccgtcactcctatggcagaagatgtggatctgggagctgttgaaggctactcatggatttt  
ctggtgctgatttggagtttgcgttcagcggactgtcaagttggccatcaaggaaagcattgaggaagatattaagaagaaaatgaagcaaaa  
agctgctggagcagatgacgttattatggaagaagatgctactgcttcaagtacaaagacccatgttgaagaagctatgaagatggctcgtc  
gttcagtcagtgacggtaagttcgcgatatgaagcttatgctcatcaactccttacctctgtggcttaacgggattcaatttattcttccaac  
aataatgctaattggaccagcttggaaacgatggcgtgatgattgtacgatagaaaaactgattgtatgaatataatctgatgacctttg

atctcgtttgactatgaggatgatatttgagaaggtgtaatgattactgtctactaagagagcgctagatTTTTgtgatgtagttaaagaaaga  
aaaattaaatattatttggttcacgatgagtaagaacggaaaagcagtatatagacagatgatagatatttccgaggtagaagtaaatacaaac  
acaaacaaacagtcgataataacgaaactcctttaaggagctaggcagcgtaaagaacagctttacggacatcgggtccgctcagaaaaccg  
ttgccgagctatgaaacttaacaaagataggaaaaaacacagagcttgaacaaaggataaatattcaattaataatgggtgataatgtacaa  
ggatgatattcgagaacctcaaaagtaatacttaataaaaaactccatacagggtcaacaagaaatctacaaaagtaaagtaaaaaaaa  
atgcaatacagatgtaaacagaaaaatattagataagaaataaaagaaatcaactaaggggattctctatgtaaagtatgtctagtactgttac  
cccaataagcgacggcttataagcagtaagatgatcaagtctatcaatagacacaactaagaaagacgctccacacaggttaaacaacgtgg  
tcttgatatccttaaaactctcgctacctgtcgtgtcttttcttggaaatgttactgtttggaagtaactacataaacgggtgtagaacgaattaac  
aacccaaattaacagagatacgcctaaaagtcgagagcataggctttatatacctaaaagaaactgaaaacgacgggattgaaatgaaatctgct  
acaatttagcactaggaaagagttgggtagttcaaaagtaaaaacgaagcagattgccactataaaatctgtttgtagatcgtttgctgacttt  
gcaattcaagacctattttcattggaaacgtttttattatcgcgcaaatataaagggttgcgtttgttgagcaggggttttctaaaaacaggcaa  
tatatccaaaaataattaatcgtttggagcagataaccattgttatgcgttcagctgacgtgcataacttaacagtcataccataccgtatt  
gctgggcttggcgcgtttttatctctactcctttgtgtagattaattttgtcgtttgcttgcgttgcgttgaatctaggctaac  
gtaaaggattgtattttctcattgtctagtctttttaaatttttgcgggtgggtgctgattgtttgttttctaaattttcttctgttga  
ccttcaataaacatcgttctcttttgggttaaaccggcagctcctttaaagattgtgatttagttcattcattgaatgactctgtctcttgggtgtt  
tgacgccaattatcatctaatctgtatcttcatcacttagattgtttgttaggaagcgtttctcctcctctcatacataaaactcctctttac  
ctatttctcactttatctacaccataagtcacttctttttatcttccctttttgtgtcttctaccatctctccatttctcgatatctcgactccga  
cctatccctactaatctttaaactcttcatctcaatctctgcagccttttagtgcgttttagcggccttttttcgaagatttaatttcttggacataaa  
tactcgtacgtgttttcttttctttccttattacccttttacttttaatacaaaaaaaaggagattttctataaatctataattaatcctaatt  
ggttactgatcttaattccttttaattatacctctctacaattagcagatgaaccaggctactaatacagctccttctaattctcgtcatcaacattct  
tctccagtgtaatgctggaacgcaaatgttatgatttctactcctacaggagttcaaatgtcagacaaaggaaacagtacctttaaacaaca  
attctaataatcaatcaaaattgtgacagatcaatcaaagagctctaattttatgagtaccactcagaaaaaccaagaaggatgccaatggatct  
acccaaaaggtaagcagatggttgcactattgcaccgcgcttttgcgcgtttggaacacttgaagaggcatattcgtctcacaacatgaaa  
agcctttgtctgcaagatattgatggttgcccattgggtgcggctgtttgtttccagacgtgatttgccttctcgtcatcaacagaaaattcataa  
aaatcctaaccaagaagacgaagacgttcgacaaactctatcccaatagactgtcgcggaccccagctttttattgcaaatatgaatgctcc  
taacaacgcccgtacctcaaccatccacaaatgccgattcccttagattctccaatctcaatctcgaatcaacaaccctcggtttcttctcct  
ctgcatcttccctctattctaagcgggtggcttgaatctcaaaagcaacgttttagtatctgcagtaaatgttgggtgatgctgtagccttagttac  
cctctacttcttcttcttccgaggttatcctatacctaaatccctctgttgggttgaagacaattcttggtttccgctgcgcaacaatcgccat  
gaactatttctcctgttcaatatcaaccaatgtcaggtttgacgatcagaaaagtcctgactgtaattattcatcttttgatgatgaccttctttat  
tatcatatccttctttccaaaaatgcaggttcaagtacttactggaacaaattgactgttctgaaactattctgagggtcacgaagttgataa  
atctgattggggctattttctgatcctttgtctgttccagtgctcagggatgaattcaaatgacattcttgacttctcagccatctcctcatccat  
caccaaaagagccagcaatgcaaatcccaagtaactaccgtttagaacatctaataattctaatacagattcagttgattatgttcgacca  
gatcatgttgagaacgctgccctaatactatgtctcaatggggaatatttttctcctagtattatagctcgtactcagatgatgcaaccttctatg  
gcggctagtcccaacactttgccaccaacctgcgaatgtcgtcgtttgggagtggtgatgcgaacttggctcagatgtttatgacacagatgcat  
ttcctcaagtgggatgtaggcatggatggagttaaaggcttgaacccccgaaaggattgcatcactccaagtcagctgcaactaattatc  
ttggctcgggttagtgaggaatatactgatattatcaacgggtgggttagcacaggagatgctgtacgcgataataatgattatcgacaagacagg  
ttaatcctgctatgtaggcaattggaatctacgggtcgtcgtcctcctttaccgtaacagctacttctacttctaagtggtcatctgattggatta  
tatctcctcagcataccgaactttagtactggtttagaacaactttagagcatgctacctttattgatacattttatattcatttcttaa  
aattcgttgatgttaatttttttttaaaaaaaaggaaagcgtgttcgggtcatatttttgacaacaaattcttgggtgagagttacattca  
taaaaaattaatctcaatctagtgtttgtacaatcagcagttcatgtgtatagaaagtatcgttagaattcaggatctgaaacatgtaatgtgattt  
gagatgctcatcagttgctgaaaatcaattgtattcaagtacagacatgcggaattcaaaaagttagattatattcaaaatgcacagaaaacta  
gaattcatttagacataagtaacaacgagaaagattatgaggatctaataattacagaacgtaaacttgcttatgaaaattaacaacatattg  
tagaagagggagcggggcgtaatgaagacattaataaaaacaaaatagcaataaagaaagaaagaaatgatacagcaacgtgg  
atattgcttgcgttgcgagtcacttttctcaagcatttctagccaagtttagccgtttgtctaccgatctacatgctcatccatattggtcttaact  
gattatgttctcagttcatggtcattaagtagcccaattgcttttgccttgaacactagcctcagttccacctaattgacttcttctgctgtgag  
catctgctggtgcatctcgtcagtaagttgacatcaatgggattgggatcatttctcgaattggtagatggattccatttcaatatctgattgtt  
ggacgttgcattgaaatcaatggagcagcggcagcctgctggatgagtaggaagattgaaaacttggcttgggaagcagcatttgccttct  
cagcagtttctcgcgagactcaactcgtcgtcgcatacgaattaaatattgctttagatttctgaagcctgtattcaggaatttgacattctgtt

ctaacctgtttgttcttgacttagactttgtaattgtctacgaatatctttaaagaggatcgatctctgcatctggtgagttccaactcgatca  
atctcataatcggtgattttctctgctggaatccactaacaacagtaactttgacatgatcggtggtgtttgattactctattgcagattgagtc  
actctacgaagaagctactacgaccatgaacgacagctgtgcggtgctactattacggtttaggacttgacgaatgaaaatctcgattaccgc  
actcgaacggcgtagtgatttttacaagagaaaacttaggagagattgacaaagttagtagaagaactataaaaaacgaaatgtgcga  
atcctctaactaaaaaggataaaagcaaacatacaaatgggtgattgaaagaaattccaaaactcgatttctcgaagtgaaagtaaaat  
taaaaaagggcctaaccaggattcgaaccaggatcacctctaaactcataaactcagaagtggttcttaccgaaagaggtatgtaaccact  
acactattaggcgttgttcatcttatgatttaagaaaaatataataaaaaatcttaaggtagaatagtagctttgagtggtgaaaggttcatt  
ttttatccagtttaactcggatttctacttttttttttttctctaaatagaaggattcaatcgtaacttatgatttgggtgctaaaaatctgt  
acataagggtcgcaacttattggaagtcgccagcaacaacgacgaagtatgttatcgtcacagaaatccataactagcaaatccatatctag  
cgaataggtgactaaagaggggttccggaatttctctgtaagtctctggtctggtatgctggaatgtgaattcattattgacgtatcgattgtca  
agcgaagcgcctctctgtgatggattggaagtgatactctcgtatgaagcaaatgcaaatcgcccttagttgaaaggagattgaaagg  
gacaattgaaataccaactcttagttacatatgtctaaattattacttaacagttctctgatggtgtagttggttatcacaccggctgta  
atgtctacgataccggttggctgtagttcaaatctggctcaggagatttttttcttgaatcaaaaaatagggttctcgcgtattgtttgca  
atgctaattggattctacatgattttctttaaagtcgagctgtagttgtcaaaaaaaaaactaggtaacgattacctaactgaatcaccactgc  
gtaaggcttgattgcagttccaagaccaaatcaagacaagcaacgggttttacattgaaccgattgccagttgagcaaggattactaaat  
cagtgctgaagcgtgtcttctttctgaaaaaaaaaactcttctttagcatcgtatcacggagttataaaaaatggacaagcctaaa  
atcttagcgcctgaactgggagtggtgctttctgggcttccggcttcaaggtttctcttcagcttggcgaatgtcttttaggtttatc  
atcatcgcttggcctcgtaccatcgattagaacgtgaagtccctctgtagcagtaaatgctcctttatgttctctcttgggtagaggc  
ttttctatctattatgggttcttggcttctataatggattcacatcttctggcttttagttcttctgttgggtgctggtctgtgctgctaa  
ctacgtgcccgactacaagattatgctcctcgaagcatgcgcgatacagactgggatgatacggtagatgaggttaagcacctaaccggcgtc  
ttctttcatgttagctccagctgaagtagttgtatgttttctctctcttttcttaatagtgccattctttttttttttttttttttctg  
cattcatggtagtaatttctctaccttgttaaaaaatgttactagtaagcgaataaaatccgcttcatataatgaacttacctacggcatta  
cttgaatggagcgttccattttcattgtatgggctaaaaactgtagaagaaacattgagatgagtagaggctaaactgatcctgaaaaggttctt  
gtagatatgaagcagaatccctttagcctccaaatccctaagatcacaanaatctcgcgaattttgaattatggaaggttccctctaaacc  
atggaattcgtttgacatctgttgaatacatgcaggcaggtgattgctagaatgaaatcttgatagaacgattgtacgcatgagaatctcgtc  
aaaataaggaatactttctggtcaagctaataagctcattcttgaacagctcgtttgtcaatacaaatgtgtgaacatcatattactctcgt  
aataaactaatcaactattaagcaactgcagtttccattcttacaacaatataatacaaaactgagataatattccgacagccgtgacgg  
gttgaatctcctcaggtcaaaggacattgttacctaaagatgggaaaggcgacaaactggcaaaagtcgaaatctataatattccgggga  
agcactacttctcctacaaccaaacactgtagcttacaattaccagcttggttagtgaactgttgggtatatcaaggaggaaaaaatgacatgt  
caagctcaacaatatgaacatgtgcatgatttcttattctcactttctgaggtgatcttccagttcacaagcttgggaagggtaaatgcg  
tggtgagtggttccgttgaatacggatgtataagtaataatcaacataaataaattccttctacattgttttagtcaaatagtaaagataa  
agaattcatgagagaaaatcgtaaatattatgacaaaatgtagacttaactgctgcttctgcttcttagtcagtaggatctggccttccattgtcca  
tatgacaggatctgtgtgagcacagtaattgaggttgcagatgatattgcaggaacttattagtcacacaaaactacagacctgatttctgaga  
ttcatttcaaaccatcggttcttaaaacaaaagcgtcacgacctacaggaagaatgccacaatgcttattacaatggtgccagtttagaa  
ctttctcctgaaggtagtagcgaagtcacgttctcggacagatgtaaagctgagtttcttctgcttgcatacgaacataaagatgatttag  
gttcccaagcatggtcaactcgtccatccatgccacaaaagtgaaaatgacagatattccatttcttgaatcaccttctgagccttataaaa  
tctgtagagtattggtcaggatcgtggagatttgaacaccattcgtttagtctcgcgtgtctcattcgtcaagaatcaaatctcccaca  
gaatgtcaggcttcaatgtaggatcgtagtttttaacgattcgatcccatccgcatatccgaaggcttgcattatcccaagatgatggaa  
acgattatcagaataactaattgagcgggtcaaaatataatggcatattatagttgtaacacgttattgagcttctcagaccaggttagcat  
gggtcaaaatgctgagactctgttaattcgttgggaggaggattcacgctcgtgctgactgctgatgatcatgattttgctttcttatacttgca  
attggatgaggaagattctgttatccgctgaaatgtttcgaatattgaggatgttctggacttaaatgcatgtcgcattaagaaatcaagaa  
tcaagagcacaattggcttgaatccccgcggtcaattcttgataactgatccaaggtccaagatgaaactctgcaacctctccatcatt  
tggcgcgaacttcttctctgcatcggaacatcgaatacgtattgtaactccggctggtaccatttcttgggaaaacttgatagggagaca  
ataccacgggaacgtaactagaatgcgagacactcaagttgcttctcagacattctttaccatagtccccacaattgagtcacatggctg  
attcctcctgcaacgctgttatcgagatagccaggccaagtttcttgggtggacgaacggtgggaaccatagacacataggagttgttgggtga  
ggaggaacataaatgttacaatggactccatagctaaacaaaacaaaagccagatccacctcgttccacggcaaaagcaactcaccattgg  
gacaaaagacgctatataattcatttccattgatcagccagccaaaagattcgattgttccaaacttggagaatcttttcaaatggaaga  
tcgcttcaaaatctgttgcgttcagttgatcgatttccgggcttatataatccaatcgtaaacgaagctatcgaatttactaactctgataac

ctctgggataatgtagccgatgacagcatcattcaggtaaaatggaattgtccggagatgaaattgttatggaagagtcacagcggccagta  
gctttaccagatcgagctgttcgattgtcgaaattgaagtcattctactatttgtgaaaggaatcttctatgaaaagtaaaccctaattccctcccc  
gaagtatgccaggatgctagcaaatgtaataaccctgaatgccaaatgcagaatagcacaatctaaaaatccaaaattaccaataaaga  
aaaaaaaaatatcaggagatagaggtaaatccttctgtaagtgagtgaaaggatcgtagagagatggagtgatagttgaattatcccttcta  
gcaaggatagcttaaatcaaccttaacttttagccctagcagttgcaaggaaagtaataaagaatcaacaaattcaacaataattcaat  
agaattaaataaatgaacttactttagaagcaattccattcaattaaagtaagtaataaataaaagggctgacactaattgcttcaagcata  
aagcaaaagacttgcgaaatgaaattatcataaagaattgaccgagggtgtcctctcataagttaaagaaagtaataacagcatttctca  
tttgatgggttttcttgcattgttagcttcaaaactctcacagagttataaaaactagaaaagatcatgacgaaaagtcattatcatggaactt  
gagagtaagtttctgttttcaatgcataaacagaatgaatattgcatgtattcaagcaactggtttcttctcaaatgctgttaattttggat  
acatcgcagaaaaaaatacgtaaaagaacttctacaagatgaacaactaaggaattttttattaaatttttcttataaaacattac  
tttatgataaaaaaagaaaaaaacacatgaagatcaggaataattggagcgagttcctttaacatcaaagtagcaagctactctttg  
ttccctctgtaaaggaacaagagagtgatctaatgaaagctacgtgaaacgatcttctgcaaaacggaaccacaacaagaattaatagaga  
aaacagttgtcgaagacagttagaattgattgggtcactgatttctatagcaagtttaataattttggatcacattttcaaggaaaact  
caactacataaagagacatcatgacttctcaagagaaacaggctggaaatggaactaatgaactgacgatgaatttgggacaacagtggtcc  
cgtttcttgggtgaaaagaagactttgaatgaatcgtacataggtgacgaggaccctcttaaccaatggaaagagtccttgggtatttct  
aacaagggatactctctctaatgacctagaacagtggtgattgaacaactcagcttctgtcaatggctgtagccatcatgctgatgc  
aagatgaaggcagtggtgaaacaaattcaaaagaagggttctcattaaggaggatagtgaaatagaattgctgtccgcttccgtgtcaacat  
gaactcatttccggcttacgctatgtcaagttgtcgtcagtaggaatgacagttgacaagtcgtctactatgattggctcttagccctaatga  
aactccatagaattactagtaagtaattttgtttgtgattgttctcggaatgaatgtattgctaattagagtgctagcggaaaccgaagaagct  
cctagcggattccttgcctgtgattacgaagctattggtaaattatcgatgataccaagttgtccatcatgtagttcaatgggtatgttctta  
tattcttgataattgctactaactgtggtgtagtattgatgtcacaataatggaagtagcgaatctgctgtagcagcagcattattctg  
ctgaaacaacaggaccacaaacttattatcccaactttgtctaattttgccttctttttctattgttgctctatcactgttgattcttgatcacttgcctg  
ctttgacagatgctacgcttttacttttctaaaaatgcttacgaaaacaactagcacttctattcatagtataatcgtgctttagaattatattcc  
aatttattcaagatttcttgaagttgttttgttcagagcctttactacaaaaccctatcattcaagttgctagcttccacgctcatcttgtgctga  
ttatcatacctcttctgaaagctgtaagaattaatcaaacggtataaacggctgttattacttctttttcattcatcttttcagttctagcttaag  
ctcatattataatacaaaagcggaaattccctaagtaataaagggtttaaactagagaaatcagtaaatattgttacttaccgaaaagtaacaat  
atcacggcctctcccttactaccgtcttttggatcctctatctcaaaagtaggttaattcttgttgctagtcgagatatctatcttgcagatatt  
ttttgagaaaataaaactaaactttattttttaaatctctttcaattttcttttagggatctctactttcacatttttaacatgaggaattctgtca  
ttatcggttcttctcgaactgcccgttggtaagtaggaatgcttgggtcccgaatcgtttgaaggaaggaataataataggcttctacggct  
gaactgaatgatccgggaggaatcattcaagtgattttgacagatgctatgggaaagggagaaagaatagtaatttatgactgggtgctc  
tctttgaaaggatttaaaagaaatgaaacaaaaataactgattttgctgcatggaaagctgatcgatcgaatcggggttccgagctggcttcc  
tttcttgcagatgaacatgttctgtaatatctctcaggtatggcatttttactacaagcgtcgaacgaccctactttccgaaaacattgagt  
atgtccacaatatataaatgtcatcggctgtatattcttctgttgcgtaacgaaacggtttttagagcgtcattacaaaagggtcacgaagct  
aagaagcaagaagaacagattgctgtcaagaaattgatgaagttatcgaagatgctctcgagatcgtaagctacacctacccctagtagcgc  
tgaagaaaaagagcttctttatgacgcaagttgccggtggaacaactctcaacaacgatgaattattgcttctatgatttttctaaaca  
attatagaaccgacaatatcaaggaatctgctgcttattatgctgctttaaagatatacctcaaccagttgaattgttttccatttacgagcgt  
accgttctgaaccatcatgaatctttaaagagctatgcaagctaaaggaaagcaccctactgtggagtaaaactttaattgtcaataaaactat  
attctcattatatacaataaaagataggatgcatgtaaatagtagcatgccattataatttattcaaaaagcgtgagaattggggttatctc  
cagcttcatgttcttaattctgtactatacatcataacttttgataccgtttcagcatatgatttatcacgaggaaatcctttgactggtttcaatg  
aagaaaaccaacttcaatctgacggtacaaccagtttcgataaagtgaatctggttcttgacctcaacatttgagtatacaaacgcgtaatg  
tgagcacaataaccgaaaggcaataaaagagctgggtgtaactaagttgatataatcctttccattgtacattataatatttctgtttgagctgtt  
ttcacgagaatcaagaactgtttccgcatcattttcaaaccaatggatcgtaaatatctaactaactgttttcttgcgtaacgtaatccc  
gggaatcaattgatgtaagaatagcttctttagccttccgtcttatacttagttatccaataaaaaatccgttagtaattgttggatcctttc  
ctttgtaagcggtttctcagtaaattagtatgctatagcatccgaatactgacgcagagaaataaaattatctaattgattaaattgtcaaaaa  
gatttagcaaaacttcttcttagagcataagactgtagaagtaacggagaatcaatagttttacaagcaactgaaaagacgtgtatgacgat  
aagcttgcctgctcacttctgacgaaatgtcaagctcattcttaactgtgtatcacctacagttttgagcatgttcgagcagctgttgagactg  
gtattgtctagattgacggataaagaagctcgttctcaagattactatttccagtaaaaaatgcttctatcacataatactgaagcgtaggat  
aaattcagagcttcttcaagttggatcatcatcatccgcttgttcaggagttcaattggaagaattgtaaaatcaataaggttccattgata



aagcgtctgttctttagattctctttctttatccaagaatgccaagaggtaacaaggatgcagtcattaataagtaaagattgacaatcaaacg  
aactctttgatttctagattaatgagtgccaacgatctgtttgttaattaggcttctattcggactcttcaaaaatttctgtttacacatcaatg  
gtatttccaatcggcgattgatcgttttagattatcgtcagaaggtttgtgaaagctcgactaaatttagccttcgatgtttctccaagaca  
cctaatagcgatttgaaccggtccaatctggcttaaatgtttacttactggaataaagacgtactcgttgagattttataaaagtcttctcc  
aaattcttcggactccatgtggatacgtaacagttgtatacaaggaacaaattcctctctgtggcatcatgcaatatacgtttaaactga  
tggagtagactgttaataatcgaagtagatgaaaacgtacaagctgagggtcataatcttcattatcgaaatattcggatttagaaacttc  
atTTTTGacataatattgtttgtcgttttgcgataaatatcatctgtttagaagtccaactcgaagccgagtaggagactaaaatgtga  
agtactttgaaatcgtctttcaaaacctggcgtaaccaatcttctcagaggcttctcggctgctatattaagtattgagttcctggtcattagt  
ctaaagcaatgaaaacgtatcgacatacgaagctcatcattagcagttaaatgttcgtttgacattatagcaaggatacttgaattataaccg  
gaacttcttaattcacgagaagaagaacaagttctcttattcgtgatttctgattgctggactgaaatgttcgaatacaaatcataaaagcc  
gtttaaattgcttttagtaataaaaaatgaatataatttctctattaatggattaccagtaaatattacaagatcaacgattagtctgttggta  
tcattatataaaggatctatttaagtaacaatgtacttgcgctacctgttcacttggctgtttgttacattgaaaaagcatgaaatatac  
tgattgtgatatcgtctgaagaagagatacatagggaaatctagatataaaatagtggtcattcaagctagaccaaacagagtcggggtat  
tagattggcttctgttctgtttccacatcataggatataaagaacgtgcataaggcttctataaaagtattcttttattgcaattacactcctt  
catccttgaaatgaaatgtttcttctgtcgaagcagtgcaattaacatatttctacttatgagacgtaacaagcgacaaaaagtagttcagtaac  
agttatagattacattgaaattcacacgaagctcaagcttaattatagaagaactgaaatataaagtacacagaccgaaaatgaattgattct  
attcaagtgcttgcactagtgagctaaaaccatttacagagaagtagtcgatgggtgccttattatctaatTTTTgttgaatgttcattctcc  
aagcgaattctataaacgatgtatattctttaaaggacatctgtaaaaaaaacttaaacgtagctgtagccttcccactccaacgttttagat  
agtatgccttcagatgattgatattcaataccgttttggagcaaagttatcaaaatctgtatccattagaggtttaataaacctgtttgatattat  
gctgaaattatggatacaacactacgtgactttataggtactgaaataaaacgtattacagagaatctccatgggaacgtttaaaggctccttt  
aaacaagcaatttctcgataatagcgtccaattaccaagatgtcgttcatcttctcgggaggaagacgtccaatcgtagtaatgtctggaga  
tttgggatagtttaacacttacggtattgacattccttcagaatggatagaagaaatggtaacaaactatataacctgtggaagcctttgcata  
aacatggcaacatatcattcatgaaattcatagagccccgaataaaacttgactacgactgcatcgttcttcttctccccgagagatcc  
ttttggcagccttcaaaaaattctgttgaatggcgtggactgaacgttcgtatagacccttaccccaaaattccttgaccaaacagtcgtctt  
ttactacggttggtaataataaagattgtccaactccccgtcttcttaacaattggtaaaagtaccatgaaaagatggttcctctgtttg  
gacacgaatgtggaacgccattacatgacatctcctttcgggtgattcaataataggcgtttatgataagctttagaataattgctggagaat  
aactgatgattatcgtttggatatcaatttccgagtgtagtcgatgataggtatcgtgttgagaaggacagcatcacctgtcattcagatac  
agattaccactgtattattcgtaaagaacttttggaaatcagaaccaaattgagaaaagtagggagttctcaaatcttggcgtcgtcaagttg  
atatttgccttctcaaatcgtgcagttcccaattctcctctacagttataaattcaacaatgttccattaggaagatccaacatgggtatgtttc  
atatgacataaggaatagcgttccgaggaagtaaatgtttttatagaggaattagaaaagtataacctgaagagtcgatgaccgagtcctc  
tacttaccgaattgatggttattccctgagatgtgaattactatatacgcaatacggatctgtctcacaccgttttatctactggaacgtgtcttc  
tcagcagttgcttccgaggtgacttacctgttctccttgacaactgaaccagctcaagaaaacgagctactgttttttaaaaaatccttg  
cttctcaaaaacctttacacaacctacgcgggaaatattacacaacaaatggcgttcttctgatctaatataacttctagatatacgtataagaaa  
gctctttgactccaactaccattcgaattgtagaggattccatcgaagcaggaaaccgcttatcaggcattatagacaattcgcggaccgatt  
tatcgggtacaagtcgctgatgaatttaccacgaaaagtttacgtgataattcgaactcgcaggctgtgtttgcgctgacttcaattattg  
gatcagggcgtaaaagttgaaatcgcatctacagatttctggcctttggcaattcccaacttagggaacatgggtccttcttttctcaggacc  
agattgaaactggaagacattcgtaaatggatgggtgattcagtgaaataattcagtgtaaatatgcagcagaggatgggtcaatgttttc  
caccaccaagacatagatcgttttctgttaataattgcacctagaaatgatctataaaaaataaattgcttactgatggataggtatggctt  
ctctctgttttgcgtcgccttcttttgagattgatgataatgaacttttctcagctttcagtttctgatggaggctataaagggtattaagc  
ttagctcctccgactaaactagaatatcatcaaggtgacttggttttctcgcgaagcaagataaatttaagtctcctcatgctgttggaggt  
aattaaagtgtctcgttttaaatgctcgttttaaacatgcaaatcattacattattggaaggtttagggttcaacaagatgttttcttgaatgg  
caaaaaaccaactatccgaattgaataatgctatgactaataagcaaaagtgcatccttatgttgaggataacgtcgatgaaaaccgatcaac  
gcttgttatggcgacttaatacagtcaggatttttagagaaaaatgacattttcaaaaaatctcctaattcttattatgaatgggttcttaagtc  
gataaaagaaaaacagaacttaacgtgtcctaaggagcttattatcggcgtagccgatgaaacaggaactctaaaggctcattgcgatgatg  
ctgttcttctgattcctgagattttgttcaagttcaaatcatcattcgaagctgaagcttctctactggccgataaaaaacaacagtaataata  
ggtcttgtgttagctagaaatccctttgaccctggagacatacgtctgtcgtctattagaagtgacgatctaatgcatcttaaaatgt  
cgttgcctccaacaaaaggtgatagaaggttcccgcaatgtgtccggtggtgacttagatggagacgaatacactgtaatatgggatccaag  
tcttttacctaaaattgtaattatcctccttttagaaacgacacggaaacatgcagcaaaatttctggatggaaaaccttaattgactcagtc

aaagcattttttatttgttatataaaaaacgataatntaggaataatcaaatgcttgaaagcatgggccacgataaagacaataaccctgac  
ggaatttatggcaaacctgtttaaaactagcagccttacactcgcaagctgttgattttcctaaatccggcatcgctgtactatgcctaaagaatt  
aaggcctaagcaatatccggatttatgcaaaagcagcgcattcagaacattcaagcagaaacggctgttgacggatctttcaatatgctgcta  
aatttcaaaagggaaaatgaaggtattcggaagttgatccgaacatggaaatggtttacgatgatcgaatgaagttacaaaaatacaaat  
tattacacatcgccggaggaagtcaaaagcgcctatgattttgatgaaagctttaatgaatcgatgatgagatagcttcggaatatgaagttac  
actgctttatactattaatgatgatgaaaacatctatcaacgaatggagtagcgaagaattatgttacaatttagcattataaagaaa  
gcctatgtaacgaatactttgaaaaatcgccgactttccaccagctgcttaaccaagacaataaggcacgaattgacagtgccgtagctgctgc  
gtacgatgaactgacaacaaagactacattcttgcgaaatggaaaaggctaccttaattttcttaccattttgtcaacatactttgtcg  
cattgctcattctgcagctataagcaactgaacattgtctaaatccaacgtcgacatacaacatgatataaaatccttcttaaggctctttattaat  
ataaaattaatataatataatcaaaaatgttttgaacttcaaacttataaagtttctgtaggacgaattaatagcaaaataaactcagaatc  
tactgatgaattaagtagaaatagcgttaagattaagtagctaaaattagccaccatttacgggaggattggaacaatcggatccatggt  
gcatgaatgccccattttcgattctgattgggatagtaactattagccactttaaagacaacacgttctggatgtggcatcatagctaagaac  
gaccgcaaggtgagcgaatgccagcaattgcatccgacttccattgggggtgaaaggatattggtttgtctgttaccataattacaacatagta  
caggatgtccaaaccttctgcttgaatctttcataatcagacgcgaatcgaacatagcacgacctcaccatgggcaactgcaattggaatag  
cgagcctcccatttcttagcgaaaaatagagttatccgaattcttagagtagtgaagcattactgtacgtctcactgcaagactcatttg  
aaagggaaaagtgcccaactgagcaccaggaattagtgctttaaacgagtgacaactgacaaccattgcaaggccgatagcaaaagtat  
ctttacgctcattaagaacttgtaaaatcttgacgagcggatcgtgtaaaaggattgaagtagccaaccattagcagatcctaaacatcg  
cgtacgagaagccgcatgcccgtatgccaacaaacataatctaatgtatgtttaccgtaatgatgtcagtcagtggaacatccacaggagta  
aagccggcagcatggaatgcataagccatttcaagtgcccattaacacctgttcacgcaaaacagcaaccttaggacgattgtcaaaatcaa  
atctgacttgggagaatgttcaaaggtcaaattgaaaccaacgccaggatcggaattgtccaaaatgttttcttctctgtgtgacatttagg  
attgtcccgaatgctttgattttgtaagaagttcatgccagagtgattgaagtgtagcagtgtagacttatatactatctcatcagatgcaaca  
acacatctttgagcctcactagagatgactttaccaacttctgacagcatccacaagtccatgaactctgaaaatcatatatactatcaag  
atcactatcccgaactgtattacggcaccagttcttattgaacaaagtagcaatattgtcgttggagaacgaatcaagattgaaatcacacc  
aacacgtccagcaaaaggccatttctgaaacagtaacaaataaaccaccatcagagttgtcatgataagcttgatataatctgattgtgaagctc  
agtataacagcgaaaaagatttgagtagttctacgtcttcaacatcaggagcctcatctcctaactggttgaactgagcaataattgaacc  
gcctagacggttttaccttagcctaaatctatataagcaacgaggatggtccaatttcagctcacgttttagctgaggagtcagatagattca  
acattttcacagaagaaaagcctgtaataataagcgacaaggagcggtagcagattgctcgggagcttccatccatttcactcattga  
catagagctttaccgactgggatactgatgcccaattgagggcaaaagctaaaccaatagcctgaaacagcttcatataactggcaccctcacc  
agaatgagatggggaagacatccagtttagcactcaaacgaatgatgtttaaattcagggagcagggcagcagcatattcattatacattcagcg  
acagccatacagctgaagcagctgatgagataagagcggtagggcttctaccaatggcaaatgcttccactgtagtggtacccttatcgta  
agaagtgacggtgacagcaacatcagctacaggaactgccaaggtccaaccattgctcgcgagcaacaagaccggaatgctacgatgccca  
attgtaattaagaatgattttgatgctactgcccgcataatgcaaaacacgctgaacagcatcagcgattggatgactggcaacaggtatgtaaga  
aagtaaggaggaatcaaacctttaaagacaattggatcagaattacaacacgagacattttggaggcttaccataaaaacttccataggca  
agtcaattggagattcttataaaggcgtatgtcaaaattaaccgttgcctcagtagcatagccaacaacaccgtaaggacatctttcacgttc  
acaaatacccttaaacagtcgagatcctcgggttctactgatagaacataacgttcttgagattcacaacaccagattgcataggtgacatact  
aggttcgatacaaggaatcacagcagctcaaatctggcacccaatccagcatcatggactaattcaggaagtcattggaacacctccagca  
ccaacatcatgaatggattgaataatgttgcctcctcagctgcaagatcaatcaccatttggcccagctgcatctctggatttctcgttg  
cactgatgcaaaatccaaatcttcaaaccttaccggagctcatgctggacgcagcaccaccactaaacctactaggagagcaggaccaccg  
agcacaataataggacttccaggagaaatgggtttttgaaagcgtgctgcttccgaatgcaaccaacaccgcctgagccataattggtttatga  
tatccagatattctactgttccatcagctctaggcacctccatggtaagtgctcggaaaatagccattgatacaaggacgacaaactcattattga  
acgaagagcttcaattggggcagataacataatcaagggcagaggcaatataaaaaggcttccaacatctatttccaaggctgtttaa  
accaggaatgtaaatgaaacgttgtatccagctaaaccagcttttgatttgaccctgaccaacggctccttcatcggaattcaccacca  
gagccagtagcagcaccggaaaaggcgaactcagtaggatggttatgggtctcgacctcccgagaaaaatcgatctttcatctttcattgtc  
cattcaccattgatgggaaagaaatagtagcaggatttcttcaaaacagcggcattatccgaatatgagagatgggtataatcgggatttagt  
ttatgggtattacgaatctttgaaataggtgtccattttcttccgtaatagtcagtcagcattaaaaatattatgtctgcaatgttcagaat  
tgacttgaccaacataaaaagttaacatcggttggttcgcatgttttaatgatggctcgttctatagcactcgactaggaatcaatctcgtc  
cgaagcaagagctaaacaaatcttaccattggcttccgtagctgcagcttggcagcttcttaccgcttcttctatagccaagctcaattgta  
caagaggcaggttcatgagtgtaaaaaactcatcttctggaggctcataacggagtggttcggtcatacgcagcaaaattagtgaag

caatttgtaaagtgtctcagacacacctgtttcagtggtaccgaatatgctataccacgttcaatacagattcactccctcagattgcatacattg  
caatattagtagctttcgaagaccatggagagatagtagcagtagcagggaaaaacataggcaatcgtaggacctgatggtatataatcatctgat  
ctcaagtcagataaaattggttcaggtcattagacgacacagaaactccctctttgttgaattaaataaaaatacagcttctatacgttcaa  
aggctgaaaccgtagcttctaaaagcttctctggttatgagatgtcaaggcagaacctccgtaaagaactaacattttagcgggactccaatt  
acttttaataagcactgaggagttagacccgactcgcgaattgttttagctcgtctaaattgattctacaagaaaaattcagttaatagctat  
atgtaagccgacgcaagattgcggtatctctagatttgcaaaagataatctataaaagctttcatgcaatcaaaatcattgaacgaagaga  
aaaaaaaaatgacaatgattgtataacataagtaacaatgctcaatagtcataaatgaaaggcttagacaaaaataaaaaactttct  
tagtgtgtggaagaattttagtagacaactaagtatttaccgcaaatatcttcatagcttctgtcaaaatcgtataaatcatcaaaccttcat  
gttcttggtcctcctcatcaaatcttataagttacccgggtatcagaagatgtatactcctcaggctcattgcaatgtcttccgcaag  
catctttatcatcgtcattcgtctctttgtcagaaacatccacttctcagcattcataatagcatcaagcgtaacagctgaaggtgtttgccctcag  
ttaagcgtatagttttcacgcattaaatccctaactttgtagaatctaccactctataccaaccagctcagcgtgacattcaaacgtaatgga  
gaatcccttagcaggggaagatattgaggatcgggtatcacagatttggtatatacggctcagggataaaggttttccatcaaaaatgat  
tttaggtcctttttattttcattcaactttaattaaagaagagggttggtatgcagctgcttaggatccttttaggctgtagccaaaatagt  
atatgtatcgcgaaaaggaccgaggacataaataagcaatgtgaggcaatgcaaaacttagataatgtacataggaagaatcaatgtggtc  
aataaagctcggcgcgtcaaatagggcgatctgaaataaagggttattgcatcaattacttctggacattttactcggagattccgaaagc  
ttttgatgctcgtagtggggacgtggtcaatattcatggtggtgtaatgatccatacacgacattgaccttgaggctcattatcctgttgaacc  
atcaggtaaccgaacgcgcctacaagaggattttgctggtagttgtaaaatgttggagggaactgtgagaaaaggggggtggaggcatg  
tctagatgatcgcgctgactggtgataagtctatattgaattgctaattgcatcaaaagtttaacgtgcaagagaaggtgtcaacttcttagcaa  
atgggggaattttcctgctgtattggaatcggccatatctgaaaaacaaaagcatgacgaatctaccggcactatcgatttccccattttctt  
gactcgtactaaaatcatttctttgcttagctttgcttactgggtgatggaatgatcattaggacgtagcttttagctcaagagtgcatgttt  
gggattcgaaacgactgaaacagcctacagcataagttagtaccttagaactgatttatacttcaattcactagtcagaataatctaaaaaca  
gtcgatataaagcctcatacacaacaacagagtctgtacatagatctataaagtgtatctgctaattgcttaattacaattctatacgcaccttt  
gtatcgcaggaacccacctaaggtttcataaaatgatagctatgtttcataagcccaggatgttcaatcgagggtatctttttctgatattttg  
ttttcacggacatggatgttagtgaagttactggcgataaatacaaatcaaaatctattctcggctagtgcacaacaagtaacctttcaaac  
aacgaatatttaggtaaagtaactctgcctcctagtagctatatctaagaaaataaatgttgtttgtttgctttatttgggtgtagttctatgttt  
gctagtaagtggtgcaaacagtttcgctcgggtatagtgtagttcaacgagggtgattgttcttgataaacattctatttacaattaactcaacat  
tctcttttagacattcactaattcttagctgtcctttcaattggattattgcttcattaaattgggtttcttagaggaaaaagcgttcactcgaa  
gactcgaacagcgttaagggaagaataatctttccgacgaattgtacatacggaacggaacagctctcagaatagagcatataaaagtaagaaa  
gacggtaaaaactgtttacttagataacttcttattctcttctggtttatcgcataaagaattccgttctagcttcttactgaagcatatgag  
gaagctttggaggctgttaattgtttttagaagcaattaatcttacttgaaatttgggactgcatattagaaaaaagaagataaaaaaact  
gttgaattctgtatatacagatcatagtaaagttagttcggcaccgtttactttcttaggtcctgttcatgaaaggattaagaaataagtttga  
aagcattgtcgttcaaagatgaagccgggtcagataaggatgttagttattccaagaaagactataccaaaaatactcccccaaggaaaatca  
acctcctcggaaactgaaatagatcgtcgaagaaggaaatgaaaaaatcgaaaagctcaagctcgttgcgaagttataaaatctttctgg  
ctagggaagctggtgatgaaaagcttgagagtggcaaaaataagcaagacgaaaatagtgattgagaatcaaagagctcctcactctttc  
aaaattgcctcgtattgacgtagatgaacaaagcttgggtcgttaaagccagcttctatatcgttctctgatgtatataaacataagattgtt  
tactattatagttgcaagacaataaaagcaatgattgcgactctttttgaaattgtttacgctaacaaagtttcagctgaattggcaacggaa  
gtacatggaaccttagatccctcgggtacaagttctttacatcatttctcaaaatcttattttctcctgcagcatcggcatcttcaataagctct  
tgctcctcgggtatcgggttagtgatgttaccacaatgtacgccggatctcctttcatcgtcaacattcttctcagttccaagttctgaaaaa  
gaaatctcaccgatttccctctttgatggaagcactctcagtggtatctctgccttactaacagagaaaatagaagtcacccttccgagtg  
gaacagctatttataaaaaattggatcagtgtaatgtaattttgattttaaagccttcatccgatctagaagcaagaaataaaacatgag  
gcctggtcagatgatcattttgttacgtttaaagcagagtagttaatcttctttctctcatgtttacatactgtatgtttgtttacttactg  
ttattcaatcctaataatagtagtttccgtcaattgttctcctataccttctgtttgcttttaattgactatagaaatgtttattatcgtcgaagaa  
gagccatatctcgagccagctggccacatacagcaagttatttacttcttaccgtttcttgagtcaccggacttagagtcacaaaatcgaa  
gtcttagtggtaccacttcttaataatttataatgttatttctgaggatcctagagagcgtgaactttaaaaccgcttgcacatcgc  
atatggaagtttctgaatctcgtcatatattagaaggccatgagtaattttttacaattcacgtatgaaagagaatcatttcatggtatag  
ctgaactactagaattcttgaaggtatgtttgctcatttttagttgatgactaacctcgtcggctagttatcaatggatttctgtgcatataa  
ggaagagcataaaacttctgacgagagtactcattcctttgcatcaaacagatccttatttttatcacctcagttgacatattgtattgtc  
agtttattgataaagatccgtccttgacaaggttagtcgtgactggtatattgaagtattggcctcgcgtagatagcttcaaggaagtaatttcta

aacgaaatagaggacattttgaggtattagaaccttcggagttcgttcatattcaagtacctcttttcagcagcttcccgatcgattgagtgcc  
gcattttcaagttgcagagcgagctttgtgttttgagtaataactttaccagcctgtaagcgaataacttaagtaacattttgccaataatct  
atccttatgtgtacaacaccactaaagatcattggaatataactatacaagctattgcttgaacgtaatgcagattttcgttgatgatgaatcttgac  
ttttcaatgctgttccgagcgtgcccagcaaaaaggctattgaaaagaggtgatggaatgtccaagcaaaagatgggctgactcgaaga  
aatcgctgcaataaataaagcatctgtggattccgtaaagcccttgaattcaaaataatacttacgtttgataacacatcaagaaaaactgaaa  
ggattatgattattgagcgtagatttactgatatacttaataataaatacctaattgtcagatgtgctatgaatattcccgctgctctattact  
gaatatacatccattgtatgaattaggagccgtaatgatctaaagccaagtttttaagggtgaatttttagataagatatgggtatcttataa  
ttaaattctagaacatagaggtatgattactgtttcttgaatcttgcccaaaaagggttaagaagacagactctttaaaccaccggactcat  
caacagactcaatacgtcttcaatttcagaaacttcggcttctcataatttgcaaaactgttgctataccaagttcttcaaaaacaatcttgacc  
ttagcctcacattcggagctttaaaccacataattcttatccaagatcacacgttgctcagaagatgcctttgaaagggcgacattaattaaccagg  
aacatttgttccaatatactgtaccgactttaccggtgatgtgggacgcccataacaatcgagaaaatcatcttgaacctggaaatactttcc  
aaggggaataagaatatcttgaatttgaagtttctctagatgcagaccggaaggtacatggctaaggcaacaggaagataaaaggag  
tagaaagcagctttagataacaataatgagtggtttcaagagaaaatctggaatatcgacatggtcttcggggcgagtaagaagatcgag  
atgttggcctaattcagtttgaaggtaacatcatggaagagttcaagaaggtcaatgtaataagtatcctgacggaaatatttctaagaagga  
aataaatagcggattcaagcatgaaagcatgtaaatggcgtatgttccaacattggcatcaagtaaccaaaaggtgaccacgtctcgtctggg  
aagcatcatcatatcatcagcgaggaagaaagcttgaagtaattcgatggaccatccaagaacagacgcttctataactttctcatca  
aggggcttaccaagcaagatttctgtatgatcgatgacagacaatccaaggtatacttctccaagggattatggtacagattctaaaattc  
ttagagttccttgccatttataaaatgcaagccgatcggaggggaattgcagaaatgaagattattatcattcatgaaacaaagtttattcaagt  
tcaactaaacatctacaattttatataaaagcgacatcccacatatacagacgtgtcaaaatccagcgtatgaaagaagacctacactacaggt  
tgatacatacctttcgtaccactgagcaacgtccttgggaatattgatggactcaagtagtccataatcattgacgaaaactgggtagatgg  
actcaaaactttgtctttttcggcagcagaattctaaaaacaagttagtctttaaagcaaaaaataaaaaatatttgaagaaaaggaga  
caatgaattgtgattcgcgtctatttcaagatatttgacaagaatgtaaaataaaactacagaaataaagctctagctttatgtaatcaac  
atacctgagaagacatatttggaaaagatcgtatacttggataaagcaagtagcgcaccggttgaagcgtcagcctttcagcggggagtt  
cttagatgaggttaggttttagctcatatttagcgcaaaataagatcactaaaaagcttttctgttttagaaaaatattcttaaggaaaaa  
atgtattctaaactgctgggactctttgatttagttcattcatatcattaaattattccttctcttttagatgaaattcgtcttttagcttgag  
acgttgagcaagttgacttcaagcttttatttttcaaaactagagaaatgagaatgttttagcttcttaacacatacagatccttcttctt  
ttttcttctaataaaatcgtaaatgaatataacttctctcgcattcgttctacagtaaacgaaaccattctacctaacaagttttattcaac  
ctatttcttttgcctatgtctctgatattcttttattctttttgtatgcttctgtttatattggctccctatactttaccttctttttctatagc  
attttttgttgattttttacctttctacataaacaacacattttgtaaggcgtctacgccaagcttatacttcttaaacggagctgacacctc  
aagatgtaacaaacttgtaagcacaacagtcggattgatttctttgtgctctaccaaatgctattgaataccatacactaaatcagaaag  
gaaaattgaaaaattgaaagttgcaatacgaaaaaactctgttattcgtcttatttctggatcagaggaggattgaccgttttgagttattct  
ctcagatagtttcaaaaaggaaaagatcgccatcatgatgctggaagaggactctataccagcaaaaaatagtggaactcggagcggct  
tatggaactgcatcaaggaatgctcagaagaggtttggctacagtgctgatggaagtcaacttgaagtgaaagctgatgaagactgtgttt  
tatcttggttttatgatataattcatggatggcaaatgacaatgtcgtgggacgtttatgatgatagctgcttaaaactaaaagacctgggtg  
gaaactgcagcaatagaattatgttttaagctcaaatcaacataaatcatatttttggtaaaactgacctcttagggctgctgaaatgctt  
gccggttgaaatctcaaaatacccttgatgctccttctctactcctaccgctgaacttgaagaagatacaactacgacaaatgagcgtat  
agaatttaaggaagaaacttacttactctggccaaagcctactttagctgtaagaattgaaagagctgcttatacacttcaacactgtaaatc  
ttcaaaatccctgttctgcgactctatagtaagtattatcaggagagaagaagatagaagaggaggcagatactgttatgagctctatctatcc  
agcgtctcagctagctgagcttactcctatcgaaaccttgatagtggtcaaaaacaagggaaccaggatccctatctgttatatcttagt  
ggaattattaataggagaaggaaacagatgcaaggtatcgatcttcttcttctgtgtccgtaaaactccttacttttggcagcatggcaag  
aactgtcattatgcttggatagccagaggtgtggccagtgctcattcgtcacttcaaatgaccatgtaatgactaaagtgtttattgtttacgcg  
tctcatgagcttccaaaatcaatagctcggctacgaaaagctagccgaagtagattcccttttctacaagcctcacttaagaatacagcgt  
gctttactagcttatgatacaagaggtatggatactgttattgatatttctaatttttttagattttgatgacccgaagaattattcgaagtta  
ttctaaaagcgatccataaccgtttagacgatattgatacttattccaacattctttttagaaagaaaatcaaaactggattcttggctcaa  
gtagcctcaactatagacaaatttcccagagacttgctcaattatcgaaattattacagtttattatcagaacacgaaaaggcagttacatat  
tttaagagagcaatccgactaaatcgaatttttagctgcttggactcttattggggcatgaatatgttgagctcaaaaacacacatgccgctata  
gagcttaccgcttagcagtcgatgcaatagaaaagattacagggcgtggtacggctgggtcaaaactacgaagtttagatgcattttaccg  
cccttactatttcaacgtgcaactgcccttctccatagaccagagaatgtggcaggctctgggaaactgttacgaaaaattcaacggccgc

aagaagccataaaagcatacaaaagagctttactgggctctcctatcaatagttcaatcttaatcggttaggtaacctttacgaagaattacagg  
acttagacactgcttctgcaatgtacaaggagtgattcgaagtgaagaagaggagatgacgccgaaactattaaagcgaggatgtggtt  
agcaaagagagaacttaacaaaaaaactatagacaagcagagatgtatgtcagtgagatttgaacggagatctggaactgaagaggcaaa  
agctttgatgagagagtaagaagccgaatggaacatactcctaattgaaaaaggagctgtagccaacctatgccatcttctaaagaaggattt  
ttatgatgaatatttaagggtgaatgtaaaacaaattttctttattaatcatgaaatcattaaaattagtcacattctatcacgtatttgc  
ttaccctattgttattgctctgaaagatcattatccataacatccatcatcatttccgagcgtgtatccatataagagagagttgctatttaagg  
gtcaccaaagcgagggtgaatgatttccgagctgttcacttctgcttaatagtcgattgctgcataatacgcgtgacagcatcttcatatacca  
aatcatcagtgatagcaggaatcagggaaatcttcaagggcgcttcaagagatcagacgccacaatctcgttctgagagatgccaggctc  
taaaataggttagtaagttatattcatgaaatctgctgtaaagcaacaacatacttcatgaaatgggtaattgcaagatcaggcaatttctatg  
caatagactaaagctatggcagatgtatattcgcatcttgatagatagcataagccctgttcaagggcatcgattgcttcatcaaacattcta  
aaggttagatgtaagttattatctaaacgtaccttaacttctgtagcatgaccaagatttggccaagtagcggccaaggttttcttctg  
agtttcttaactagttgcaacgcagaattaaaaaactttattgattgctgcataccgccttataaatgccacaactcccatttctttagtaaga  
gctggtactggaataaagaataggaacttcgaagattcgtcagctaatgaaatattccgagttgcatatgttcattcctaaaaatagat  
aggggaaggtgagttccttgaacaatcgagcagcagctgtgtaagctgaaatggcttggtcatgttcgccttcgagagcaaaagaatgagcaaa  
tccaatccaagcagggccaaactgaggatcaattgtgacgatttggaaaagtatctacgccttctgcatcttataacagataaataatatt  
ccaacggcaagccaggtgacggcttttcaggatggcgatccactaaatcatgagaaaataaaaaatagttattcttttaccctttcatgaaga  
gaagccaaatgtatgggataaaactgccatgttgaaggatcacctctaagatctttgaggttatattaaacatcaaaaaacgagatcggac  
gataaagactcagcctttgatagcaataaatcagcgttatttccaaccaggtatggaagtcaagtaattctcgctgctcttaaatcagtttgc  
tgggaagtctgttgaagcgaatatacagagatttcaaaaaatcgcattcttttgaatatgtagagtagcaagattcgctattaattcca  
ttcttcggaagctgaaggagatggttgataactgatcaaatgcctcaaacattttgtgtcaaccattaaagcttctttatagcattcctttgc  
acggtcaaaaacttaaatgtgtaaactggccacgtagataacacattgaagcttctagtttaattccgccatcttgcatacgcaatttgcgc  
tgttccatgtgctctgctaaaaggattggtttaccaagcaactctaaggctccttgccagtcatacagttgacagaacagaatgctgcttagata  
tctacaagctgagctctgattacataaatcttcttctgtaataagctcttctgcttagcataatcttcagtaacaacagtagacttgagcaagccaga  
atgcatcgttcgggtccttagtcatatcaaggacctttcaccaacaatgagcacaattgtattgtgtgctcattaatgcatcatgtctccacattc  
gcaaatattcttcgctgataaagattcaagaccagcagctgcaaaaatctttccctataaaagataattctgttgatgtattgcaacatagcc  
ataggactaatcgtcaaggtagacatctgagaattggagttgttaccatttagtctccattgatggaggtgcatataagcattcgggggagct  
gaatctcctgactaaaggaagaaggtgtagcctgtaatttaagtgggctgagaccgtttcccattatcgttgtgataaaggtatataattact  
ttttcaattgttagtattcttagcgtagtgatgttagacagtatagcagtagtagggagtagaataatagcaagactggatgaccattat  
gtaaacgaagaattgaaatacagatagttacttttttctatttactattttaaacaagaattattctcttacttcttcttagcgaacaaatt  
aaccaaaacgaatatttttcttttacttttagacaataaaaaaatcacagtaattcaaaaaaatcaatctaaatcttttcttaccataaat  
acaatgaagcgtgaaaacaatcgcgatgtatacagttaatcgtgtcttccatcttctttgtaaattggaattaccaataactttgagcttca  
ctcatttgcgaagaagcttccaacgcctaaacatacgaatcaaggagccttcatatacatcagtcatttgcacaaatctgtgcaagctggct  
ccatgagcccaggcatacaaacctccatcaaggatggcttgaactgttgacataatcctcctcattaacatcaagcttcttctgagaaact  
tagcaattcgacgagccatttctgtaaattcgaagggggccaccaagttctcctcatgctgctgatttctgcttcacttttcttggaaaacta  
cgcaactaagaagagcagcacaattgtctgactcaagcattaaaaataaccgttaaaaacaagctccgtcagtagcaatccatctccagtacta  
atttacaagcaacacgaccttctttctataacatcgtccgaagaagtaaatcctaaacggcggaggactcttttacgagcacttaattcatcc  
aactgcataatagctttgctttgaaagttgcttctgagatctttattgatcaagcagcagagcttataagatattgatcatattttctttaa  
gatcttcaaagttatgaaggggattagacagcagctgacttctaaacatccaccttcttcaactcaagaaagctggctccttaattgttata  
ttttcaacaggatccaaaagactaattccatcaggaacacgccttaactcactaagagcttaccacagctcctttgagcttgagcttca  
agtattgggtaaaaatatacgaatagagcaattcgttcaagacgaaagaggaaacaggaacccttcatatcttccattgtcatctccttag  
gcgtatgaatctcgggtaagcgaccattcttcatccttgagcttgccttccgttggaaacttcaaaataacatctacaactgactcctgagg  
aagatactccttagtctacccttgggaagtggtctcttgatagccttacaacgaccccaacaaaatcttctcattctgctttacggctaca  
gtcggccactttgcaaaaatgaagagagaataggatggttaacaactgttcaagctcatctcggtaatttcaattgaaagctgaattgat  
ggtaatctccaacgcgcgctcatcaggaatggatgtattgtcatattgttgaagttttccaattcttctcaacttaggaactccatactgtt  
ttgaaactggaaaagcaacgttcaagcataaactcgggagaatgccttcaacagtagcaagttcaaatcatgttataacttaagtgaaaa  
gcagagttagacggctgcttccctttgagcattgtcatagcaacagaggttccatttttcatcaatcattagaattacaacaccacggctcat  
ccaaccacgtctcagctctaccctcattgaaatattcaccacctgaaatccaacggaagctttccatcaaaccttctaacgttagtgaa  
aacgacagcttctcggggcatattgagaccaattgagaatgtttcggtagcaaatagaacttttaataaaccttcttgaacaaaatttcaataac

cttttcaaaattggaagcaaacagagtgatgaataccgataccgcgacgtagcagaggcaggatagtctcaatttgaggtaaatacagatctt  
tttcggacaattgattgatggcattatataaaatagtagtgacgaggtcgcgctcagtttcatctcatatctagttttgacatttgcaaggctaaa  
gcttcgcaatcacgcttgctgaaactgaagacaatgacaggattatagttcttaacataatcattttcacgacttgtaaagtgcagaaggacctt  
taacacctcctttccagtttttcttttttagcatttttcttgacactataaccagctgggtcatcgccctgtttttctaccaaagcagtcattgctctt  
ggaaattttctcacggaaaactcttttcatcgacaaccaaagtattccatcgctaccacttgggaacagataatgctgtaattggtgttggtcg  
aaaatccgtataaacaacgtgacaggggtgacgggtgattttggtaatccattcgcaaacgcatagcattgggaatggtgacagaaaggaaa  
acgaagtgagccttatcaggcaataaaataatagtttctcccaacaacaccacgttcttgcacgcatatagtaattcatcgaaaataacc  
caagcaacttcacgactacctcggaaccacggtaaagcattgagcgaagaatttcggtagtcattaccaagcaggtagcgtctggattaatagt  
aacatcaccggtcattagaccgacatcaccaaattctgtaaatagttctcggtatttttgattgcttagagctttaataggactggtataaattactc  
tttgcttatcccgaagcactgagcaacggcatattcggaacgacagtttaccgcgagatgatgagcactaacatacactctcttggtgctt  
gatcgaagcaatggacactgctgaaaaggatcaaggggtgaaagggtatgttcgagcagctggatcggggcttttatgctgagatataggtacat  
aattgtagttaggaggcaagatacttggtagcggacttgatgacgaagtcaacaacatgatcagacgtcgattggcttcagccatgcaactt  
ctccagcaatctcaagacgcttctgttcaaaagaatcggttaccaaacgacatcagcaggagctttgcattatccaagcattctcgggagaaa  
tggggacttctcctgagcactcaaatctttacgacaccattacctttattgacactgcaacgggctcattcgatctggtccaaggagcagca  
acagattcctcaatttttacgcttaacatcagactgtttctctcagaagaatcctgctgcttattgttttctttcaatatctacaggagaaccaa  
cttttagaggatgactgtctccattttctcctcggactgtctaagtcttcttaagtctttggaactttccctcaaaaacgtcaaaagcatcatc  
taactctcttcaaacattgcaatgatcagttacaatcctgcaatgatgaattgggaagtcttgagaaggtaagttagtagcaccttgaatg  
gaagtttttctacaatattcagttataacgacctcttagaagctcataatgtataggtacaaagtaaaacgcagtagcttagatttttaacgga  
attcatttctgttcttattaggcacagtagccaaaagcgaacggcatatgtgtattcgtgcctacctattcataatccttgattctatcaatttgc  
ggattgtataggactgcttgtgtaagacggagaaacttagctatagctcatataaagactcacgagaaaagacggactagactgtctactaag  
attcgatcacaagcgttacctaaaaatagctagataatggaagcaggagataatgtggaccaagcactataagggagtcactactaatacag  
aattagaatccacgcaaaaataccggcagaagatgttgcgattctacaacagcaaccagtgtagtaaaacggaaacgctaccgaatgaca  
gagttggtatgtaaaagatgagattcaggaaaatcctcataatcttccgcttggatgctgtaattgaggagtaggtcgaaggaaacatg  
aggaacttcgagaaacatatgaacaatgttgcgtccatttcttacgttccgcgctatgggtagattacataaatgcagaactgcttcaatga  
tttcagagctgttgaagttttgttagccgttcttggtagaagttttatctgtagatttgggacactgtatthaagctatgttagcgcacatccc  
gaaggagaaggtcaatcacgatcaacaattacacaggcatacgaatttctattaatacaattgggatggacttacagagtggtccaatttggc  
agactttattgattttctcgtctgacactgcccctcaacgtgggagcaacaacaaaattagatgagggtccgtcgtacttatcaactgacgtt  
tctactcctattataacattgagaaattatggagagattatgatcattgaaaatagcgttaaccgggcccacagctagaaagttgtagctgag  
aaatcctgcctatattgctgtagagctgcatgacgagcttctaatatgaccaacggattgctgttttagattatactttgaaacgaaagca  
taataatgctgaaagacagcctatgctcgttggatgaaatggattgaatgggaaaaaatgatcctttagatttacacatggtacaacttgc  
aggaagaattgcatatgcttgaacaagcattgctctatattccttctcaaatggctggatgcttcttacttttaaatattcaggat  
gagcaacgtgccttacagataatgaagcgtggatgcttattgtccctcaagcttgtgctacatgttctgtatgcagaacatgaagaagcgaac  
ggtcgaactccgacatccgtgatcctacgaagcttctgtaactgcttggccagagaaatcactgagggtgaaaaacatggtgatctgatacc  
tccaaagtaaccaagaagcgaaacgactgctatcttaccagatcgaaaagcataagaaaaagttggtgaagcagtagcctagatggt  
gtgtttgatgaatgctattcgaagaacagaaggaatcaaagcggcgagatctgtgtttacaaaagcaagaaaagcggccaccaatctcatga  
aatttacattgtagtgccttgatggaacatcattgttctaaggatagtaaatcgctcaaaaatattgaaactggtttacggcacttttagcgag  
taccagattatataataatattatgttacttgatttctattaacgatgagaccaatgctcgcgacttttcgagaaagctatttcaaaaattgat  
gctagtgatgcaagcctatatacaaatggcttattatgagagtaggtatggtgatctcaatgcccgatcacctaagccaaagaatggc  
tctagtatcctcaggagctactcagagcatattctgtcccctacggttggaggaagagcgtgaggaagatgaattgatgagatacata  
tggcgtccgcttacaactgaatcaattaatcagaacaaagatgatgatgcttccgaaacatcagactctcgaagcaatgctgaaatgg  
aggatactcgattgttacctgctttagagactggagcagctctagctctcttattctgcacaagctcctgtggcactgttccattacccca  
atcattacagaactactagaagactaccatctgctcaaatgattaccggatgtttaaattgactaatattatgttattaacaaaatagaagcc  
cccataaatctgcaaaactcatggattacgtagtgaatccgatattccttattcgccttagaaatgcaaacacgatttaaaaaagcacgc  
tacaattgataaaaaactgattgaaaacgttattttggagctaatggttataatgaatgaatattttggttcttctagattataagcataaa  
aatgtgatttttaattctgaggaatctggtcaataactaaactcatgcattagaatacatattttgtcttcttatagttcttctggtttttatgc  
agagctttgacagcttatataaatactgattctggcacctgaggaccgtaaacatacttatgtatttctgcaaacgatattggcgcaggagaga  
ataaatcacattattcatatcagagaagtaaaaaagaatgttcttataaatcatattctaaacgttttgatattcatcattattactgtcaa  
gcaaaagaagcaatttacgcttgcgatataacgtaaccttcttttcaaatgtattatacagtaaggttaaccaagttatattttgtacaaaccg







acctctattaataggagatacttcacgtatccttgcaaagttacctttcccaataaccctgcaccaactgatccccagtttctgttttggcttg  
taactctattgatgaacacagtttctgaagttggaccttgggagcttggcttttcttgggatcagaaaggcaaacagtactcgttggcgaagc  
acaagcagactgggcagcttgcggtcgtcaaaccattattgggatggtctcaatatacgccaagccagcagacaagcatagaaagtgagcttgt  
cttgcctgattgattgaacatcccaatgtcttacagcttatcgatgttattaccaacaagaccaactctatggttggttgagtacatgccaggag  
gagagcttttactgtatgctccgaaaaggaagcttctgaagaaactgcagcaagttttgtggcagattcttacggtttagaatattgtcat  
aaacttcatactgtcatcgggatcttaaccagaaaatatttttagacccatggttctattaagattgcagaattcgggatggctccgttca  
acaacctgtaaatggttgaacatcttggctctccacattacgctcccctgaaatcatcatgggacgcccataatggttgcgaagtgc  
atggcttctgtgtgatactgttcttggtaactggtcgtgattaccggttgacgatgataatacgcctttactcttgaagtttgtgatggc  
atgtgaaatgccgagtgacattcccctcaagccaacacttactatctgatgcttgacgtgaatccttactcgaatgactatggaacagatt  
cgtgaacatcccttctcagctatttagccaagccaatatttctatactatcgatcagcacctattcaacctgttgacctctcattgtacaacat  
cttcttactttttgttgcagaaaatcctatgtctttatgaaagttggcttcaaatcaccttctcgagaagacctatacacgctgctga  
gccggcacttgcacccccttaccgctgctattgatcgcaatcgtgctgctcaatgacttacttggtaacagaggccgcaaaaaattatacgtt  
gatgaggaagacaagaacagaaatgaaactgaaaaagtagttcaaggtccatcatcaaccctatttcccgtacttacgttgcgatccatatac  
acgtccagcaacttctgcctcccctttttccgtccatggctagtgctggagttaaatataccttatacttcaataatcagttcttcttccaccg  
ccgctactctactccgctatgccgcaaatcctaaatctgtaaacctggctggtactcaatatttctcacattctccagtaataccaagtttgc  
gttgcactacgaactgcagcatcccttccggtccaatagtgaccccgagagttccggtaatcgcgagctgtctcttagacatgtctaatga  
cttccaggaaacgaatctgaattacaattaaagtctggcacccttttcatatgtaatggttcaggtgacatgggtcctcctaaagacgtgtc  
gttccaggttgcggagtatacaataaaacacctgggttattcagctgctaactctggcaattcgaacacagctcgttccaagttctccag  
actcaactcctatacgaacaaatgatctataatcaaccctaactaatccccattacgcagcgtctcgcagagttcgtacaccagcgggtgaa  
cagatggttctgtggacatggttctctatgggaagttatgactatataatgttctaagcaacgcccgccagtcactattactcaatcagcttct  
caaaagaagcttctgggtctccattcaacctaagagatcattcttaagaaggctttcagtagcgcgcttgcgaagtgcattatgccagcc  
ttagtgcagctgaactgagtagcaaatccttgaagttcttagacgctggcagttgctgggagttggtattgctgatattttatgatgagtgagc  
gttctgatcagtgctgataaaaacgtcagaactccctaaacctcaagggattaagattcaggttctgtccttactgaatatttggttcgaagc  
gtatttgtttgaaagtggttcttctccacatttgacccttagccactgaatttcaactaatcttgaagataagggattatagataatctagag  
ccttctatttcaatctgttcccctcgtccatcttcgagatttagtgaacgaacagctcttttgcgttttctgcaacgccagcttattcaagttg  
aaaattcctttttatcatactacagaattacgattgactcctcacaactgttgcgttctttaaactcttagtttgcgttataatttctatggtacg  
agttgacgtgaaccaggtattccctttataacccttttgttgccttttgggaaccaactacaataattttgcaatgtaatttggatcggattaac  
actcgcggttgttggctgttaggttttgaatcgttttcttacttattctcgttttgcacacagttgaatacaataaagaaccttctttttattata  
atgtaatcgtatgaagaacctgagaactctcgttttttaagattcacaatggagctctcttttacttttgcgttgcagtttttgtttttttt  
tttttttttttttaccctttacccttaaccctatttcttttgccttttatttctgctaccgatggttttaagaataacttctcgttcatcactaagg  
atatttactgttataattttaaataaacggatgttaactatataaatgttgaataaagaattttacccttcccttataactaaatcttacaata  
catgctcaagaaggtagggtttagtatatgctggtgctgtcaaagggttaaaaaagctagtagcttcagaattttaggtgtatagtaatgat  
ctacaagtaaagaactactgaaacattacgaaaagaagaaaaagctatgcttttattctagtttattaccaagtttactataagtgctgata  
cccacacttactatttcatctcaagctcaaaaacacttgataaaatcatttcaagctttagtgagtaaaactgtaaagatgactcaagtagaatta  
caaaacagtttagtaagatcaatacattgatcgaactgtcacaatttctgtagggaaaaatttggttgagcttactcagcagcgtccaaaa  
gatgaatgatggaaatagatacttttattgattgtatttagggaactaacttggaaagacttgcacaaacttttatactttagcaaaagaagg  
atattatgatggtgttcttctgacgtatgcaagcgaaggatttctgtttagggatgatcatggagaatacaaacatgggttatatagcctgtcagtt  
cttcttctcttctgtgtaagatctttttagaagtagtaacgtggactcagttccatagaataattcctgatttatgattcaaggcggagatccta  
ctggcactggtcagggcggacttctattttagggtaagtttttaaatgttttatttctgctatgtatttttctcacagattagagattcattgagga  
tgagattcatcctgaattgcacatacgggagcgggtatttattccatggcaaatgctggaccaatacgaatggatctcaagtagcttattttt  
aatatcacttacttctactaaccagcagtttttattacattggcaccacaccttgggtgaatggtaaacacactatattcgggcgagttcaaa  
gtggactcgggtttgcaaaagaatgggtcttctgcaacggattcctctgaccgtcctattgacaagtagcaattttaaagccatcgtctttg  
aagtaagagaagcgttctgtgttacggttccattttctgacttttaacccaataaatggaaatagataacttctcaatatttgcctatctc  
aggttgatctaaaaattcgaaaaagtcagaatgccatcttttttaattgattaccgggaatgcagggataggatatttctgaaattcattcaa  
aagctgaataaattgattgggtttcaaccttttttcccttggatatttagtctaaaaccgatttctatcacacagatgctcaagcatgttgacctg  
cccttttctagtaggagctggaaggaagaatagaaagtaaaaacttgaataactctcaaggtctcttcttcttgaacttctgccgttctctt  
atgttactacagctgctttttatcgaagtttcgaccaatgatctcaaaggtcctcgttccggaggccatctcgtttaaagaatagaaatggcc  
gctgatattcaagacctatccatgccaatcttcaatatttctcaattttgaagaatccaggaatctgtatttaccgtattcgaaggaacctctt

aaatagtaatgtttggcagctgctgagaatgtttctgcgttctatttacatgcaagatggcatttttgaaggaatccaccttttcgctcgttgaca  
cgaggaaaatccttccaaaaagaataaaaaataataatatacagaaagatactggttctcatgcttttattgaagcgaacagtgtaaaaaacac  
cttacagaatgtagtgatgtttaaaagaattgactagcacagagttaaaatgtagttagaactaaagaagatattaacgtaattaagaga  
gattttgcttgagctgacgttaaacatacttaacattgtatgtttggttaggaaatcatactccaattgagagccaaagcttgagccaagaa  
gcaataggaatctgcacatgtgtaaaaacgttgactcggttcatggtatttacatggcgaatgctaactactagatcaccagcttcttcttct  
aaaatattaccagtgcttctgtgatgtatcagatgtacacgatcaactggctggaatataatgaagtagagaagctgcttccatataccatt  
tgcggaatcggttgcttattccactgcaacattgttgcgatacccatgcatctagctcgaattgttaaacttcaaaagcacccttggttgga  
aaaaattgtatattgtcgtgcaagcattagaagggttaaacagttatgcaattatagacgaagaaaaggcctgtatgaaggtaacatc  
ttctaaaggatccttgcagaaccaaaggcatcgactgtatctctctgcatattcgatttaaaggactgatagctgcgctaaaccaaagttat  
gacttaatgcatgcgtctttgcatgatggattaattgtttggacaagctcttagacacgaaagagatgacgccatctctattgagcagtggtt  
atacgtgtcaaaaatccttctgtagtagtggttaccttaccattgaagggccagctgttaaacgacatttagccttgcatacctgggcgcat  
ctgttttctgaaatggatcaacagagaagtaaactgatagccaaaatcaataacttcttctaaaacctaataaccgatgaaacattttca  
ggaacatttcttttcttttttattttttcttttatttttgaagtttcttctgaagtgaagtaagaactgactgtgctgattttacagct  
tttgaacctattttgttacttctttggctgtatttatttcttttcttttcttttcttctaaaagaaaggatgaaacaacttcaaatcatta  
tatccatcaaagctatgtagccgttcaaatcttctttctttcttttcttcttaacgtctctcaatccttctgtagttgcttcttaataaaaat  
ctgtctttcttaatatctcataaatttttctgttactaatttaactaactagctcgtcggaacaataaacattcatacatgactttctactggc  
gtcttcgaaaggtggttcaataagcagtaaaatcatgaatcctgactattctaatatttttgttccccgttctcgttcttttcttgcaaaaa  
cgccataccctcatcgccctacaaccccattattatcataaaaaattttaaactcctcgtcattagaattatctcatcaagaagactagcata  
agatgtagctgatgaaagtgaccgacctttacatttccatattgtctgcatatcggaagctgctatttcaacgggcaagaaagacattgata  
atatggtatgctagagggtgttggatattgttgcataaatcgaaccagggttggtaaatgttgcggcaataagattatctctggcact  
tttgaatgcaagcttactcattctatggatcctttagttaaattcatgagtataatctgaaagtaagcttcaaatagacaagactaaattag  
aaatgttagagacatcaaggatataaactataatgagaataaaatcaattcctctagcagataactacgattgtgcaagagagacaggttgc  
atagtcatagtgatcctcaatcgcttaaggaagattcagtcgggtggttttattgtaaatagatgaatcgagcaagatcgttgcgaaaaacaaac  
cataaagaacaaaaatgagccaggatattgtatcttcttttcaatatttcttttcttttcttttagtttagtttagtataattcagagtcgg  
ataaatgtgatttcaagtttctgaaaaataacgattggaagaatacttataattgaaatttgtatcagatcaagactttcaaaaatcgtt  
tcaagtaaacagcaataaaaaatcaaaaagaaaaactcaaaagtcgaaaaacgggtctataatcaagcattcaataaaacaaaacttcttag  
aaacgagctaccgaagatggttttggatattttctttacaaaagaaaacttgcgtaagctcaagacttaatttctttgatatttattataagc  
acctacagtgcttttctttataggctaaaatttctatgattttataaaaaagcaattaaatacagactcgtgcttaccaaaacagataaaaagg  
aaaatgaaataaaataaaatataatgacaaaacataatcgacttccaaaataaataatagaatgttgaagagcaaccaacataaagat  
agacagcattaaaatggcaaaagcaagtaaaacaattatgctaaagcaacaatgaacgacattatagaaatagattaggaacataatcatt  
tggaatgaaatgttgcgaaattatagatcacacacgaagcaaaaaagaaagtaaacataataccataacatgatcttttttccataagctca  
gccttctggatattcaaatatcattcacgctaaaaacacaacatcagcgggaactcagatattgagtaaccattatgctcatcaggcacag  
tctggattattgtgtgggactacgcacaatggaatcattggcattattaatagtgatggatgacatattttaaactgttagcgtcatcagatcaagtta  
ttaaataacatagatgaatctttccatcctctgagccattattacctcgcaatctccaaaagccacagaagtcacaggtccagaattacttctca  
gcgtctgaacacattgacaagcttccagactttgactgctccatcatgtgaccagagacaagacgtagttgatccgaagcaatctccatacgc  
cctctatatgacaaaacaaagtgtgaacacatttccattttcaatatccattgtttaattgtaccatctaaagcacaagagaacaaccgattgcc  
tgtcaacgctaagcttggacaggtcctatgtgagcattgaaagtgataaacacatatttgttctagagaccacatttgaacagtcaccc  
gatgaggagaaaacgagacctaactcgcatggatacgcacagaattcactggccccgatgacctctaaagtaatacgttttctccggtaa  
atgccatagctttacggtatgatctgactgcccgactaaaagtgtggaatcaaaagatagggagagaacgggtgctggtgtgccctgtgaaa  
gtagatatacattcgccggtacgatgttcaaatcgaatggtttatccattgaccactaattagcttacattatcgaattgaaagcaggtaac  
gccaccgctgtgaccttcaaaagaccgattggcgaaatgtagtaaggtccaaaaggcgaacagctcgcacatagcttccactagctaaaaacat  
tccttgaagctgcaaacacatgattcattgtgtcatttataacctgacgacatcgaccatggcgccaattactcaattcgacagcg  
ctctgcataatacttctccacggactgttttaaggaggcgaggaagcttctctgaaaactcgggcaagaattatgcttttcgagggtgct  
gacgaatcaattaaggagcgggttcggtgcgcagctcgtttgtgaaataccggatgtattgctatctggatgacatcgttttagtaagagtatca  
tagcgtttttggatagatgccttggtagcgttagaggacttctgctcaaaaaggtaaaccccagccattttcacattttcagattgatattg  
ctcgcacatacagatgcatataatctgcatcagcaagctcctccattgctcaaacctgagcagcctgacataggctgcgagcattcaaaaa  
ggataaaatcggaagagattcaggaggagaaattgaaaggaagtcaagacggacaagggtatctagggtactggaagcaaggatagc  
aaagaaggacagcagcagatttagtatattttctaaaggcaactttctgcttctgtatagaggcgtctgaaaatgtagagcaaatgtattcactcgac

gacggcctgtatcatcgagctttaccagatcctcgttgacttttccataaagagaattaatggtaatatttcttctttgttcgtaaaccgtaattcc  
aacaactcggaggctatcggatgtttggagaagataccactacaaggatacttgataattgggatccgtaaaaaattgatgatagaataaaat  
aaaagaaactttttaagatctctatcaatccaatcattcacaatacaagaaggcaagattccaaggatcagtttattgctgcaacaaaac  
aaaatagaaaacagaattcgataattattagatattcacaggttcaaagtgattagtcgaaatcaaattcctccacaagaaaaactcaacgaaa  
aaaaactgaattggggaatacaagcttgactttggcagactcttttaaacagatacgtcttgctattacagagcaaaaccgtaaatgcaa  
gatttaataaatctttcaagtaagatgaaggaagtttcaggaataatccacaatcaattaattgtataaccgatagtcaaaatgctgaaa  
gtggatgatggatcaagagaattgagccgaactcgagttgtatataatctcgttggctgacatgataggaacaatcaagcaatcggcattc  
cccaactgagtgatccagtaacattgttgctcctgggactctttaaaagggttaaggtaacataaatgctgtcaaattttgctggtcacttca  
aagcgtcacctcgtttgaaaaagtaaaatgcaaatctccgtggatttattgagaaattcctcttagaagtaacaaaacgtcgaatta  
agcacgattaaattattgataggtgcaaatgattgaacgaaaggcatctaatgatagcgaattccatgattggaatttagcaatcgttgatag  
aagctcatcaacatagtagacctaataatcgagacgtgcattcgaattacgtaaagtgctaaattaagtttttaagagcacttaattcaagttg  
agtctgagattcaaaaaaagaagtcgcaatgggtgtggcgcttattcgattgccgatgtttaatcatacagcataagttttctatcacgcga  
aggggcaatgcgtgcttctgtatgatgagcgtttcgccccctcgcaaaaagtagcggatagaaaaagctaaatgcttatgtgagagaaactaa  
gcgttcatactggagaggggcttctggaatacacgaacgaatagagtgagagcataatcttgactgcaattcaaacctgcttggtttgttc  
agaagcgaagaaaataccaaatataatacaataaaactaaaagaaagatgataggataaagtgtaaaggactagtcataaaaaatata  
tatatatatatataacttttatttcttacgataaacaagctggctatcagctattactcgcctcttgaatctcccctatctggcacattgtct  
tcatttcttattcctgaagataatacatgggagaagaaggcaagagttgttttagggaaaggtatctaggaaaaattgagacagcattactaa  
gcatataccatataataacatagtgattgtttatcttcaattttttctatataaaagcctcctgctccgtttccatagaaatgagtttca  
ttcgaatccttattattgtacctattatatacgcgatggacgcgtttgttttttaataatgaaaagggatacaaatgatgagcttgatatt  
atcgtgaataagttcatcagtttagcaaaaacgacagatgaatagcatcatccattgttgcaactacaagatactttgctttgaaagcatccc  
aaacacgacgcgtaaatgaagatccttcagagattttggttaatcttcggcaagaagagaaaaatccactattagaatagaataggatgaaacg  
cgaattcttaatcattatgatggtttgttacctggttttaaattcaggtgtaccgaaagttgtgttacttccatcatcctttaccctttca  
cctagtgggtgtgactggcaaaagcccactgtagggaaacactaaagcaatagcacttgaagtagcaacagcaaaaggttggttctccacca  
aatccttatgttgatcgacgattaactatccacctccttctatgcaaatcaaaatccttccatcgtggatttggcgtaacttttctcctaaatcc  
cgaattggctattttttatgatcgtaattatacttgggactttaatgatgacatttaaactatgaaattgaacacctcgaatgcttactcctg  
ttcattgggtgggagctgatcccttaagcaattaaatcacttaattattgtctggacacgctgtctggttgggggatcttctcagggacaaga  
ggatagcgaatggatttagagccataccaaaaaggagagggaaaagatttgcagaacatgccgtaaaggcttgaactgcttgagcaagac  
gaatcttacttttagtcttctcaggtggacagactcgtcgaatgctggtccatattctgaaagccagtcctattacttcttcaagtcgatgaat  
gatgatgccttttattatcgcggaggaccaccaagagttgtctcagatagcctagaaaaacgtcctctttcaattgccagatttcatgaagtaa  
ccgggcattatcctgagaaaataacagttgtcttttgagttcaaacgagagaggttctaaatttacatagggaggtattcgtttccaagtca  
acacttttactcgttggtatagaccagaaggcggcgtccctcaagctagctatgatgcagaaaaaataatgccttctccctttcacagaaga  
tccttacgcttgtgtacattcttgggtgcgaaaaagaagagaacgtaaccctatcgaagacaacattcttattacatgccccgaacta  
attccttaattgaatattgccttcaaaaagttcaataactactcaggaaaattaccttggtaattattacaaccagctcaattatttactttt  
tttttttttttcttcaaaggctgggtgatattgcaaaccttattgctttatgtagatacatttcttttcatctttgtttactgacaaaaata  
gaccattcttttgcattcttattatataaaaaactagaaataaaaaaaagacaaaacggcataatttggattaatatgtgttcatttcag  
cataaagtagatttcaatagagctcgaattgtgtttgtatatactagtaaaactaactagaaagtcgtaaaaagttatggattttctggtgatcta  
ttatcgttagaatatgtcacacaatatagcaaatatctctttacctcgtatggttttccattagcaacaatgtcctgcttcaacaactgaaaag  
aaaagtctccttggatgtcttgatagttcctttctgatgaaggagagagagctcctgatgatgtgaaacttattagtaaatctatttttaaa  
aaaaatacatacctcattgcctgttataaataagtaggtaccgaaggaaaagtaaggaagatgagagaacgcttcaataccatcagcat  
catcttcatacataagatcatttcagattccatatacaaaagttgtgcacgttgagcctgagtagcttactagagaaacatcggttcaccgat  
ggactttgagaccctgaaaacggtcaaaaagtcggtacaaaactgaaaataggtgaaggattttctgattcttgaactaactcaagttcacttt  
tgttaaacagtttttaggagcaagcaaaacaagagcctcacatttttccaacctttggctaactcagcagcaatgctcgtacctatggaatg  
cccgacaagtacaatggagtcagaaggaaaaatgctttcaatgacttttcaacaattgtagtcaatccctcgtggacaattcacgaggtga  
tcgtcctaatgggaattaaaggcacgtttgacagtcctccatccacagtaatccagtgaaaacacggatattcaggcggaaattagattgattaa  
cccttcaactgagccatttggcccccacacatgaaggaagacaaatgctttgagagcgaccagattcttctgcaaaactgtgtcagctgc  
cgtgcgcaagtaatacgcacttgataactgataatctaactggcaattccttctacgttctttgataaatctgtagcaagaagaatgagttggga  
tcggcttctgttttaaatgagaacgattgttcttctgctgatccacatacattgaaactgacagctagataggcatcgtgtaataaaggga  
aagaaggaacaatatagctattccgagtaggaagaacaaaagggaatcatgctcgaatgtttgaagttagtaaaacaaagctttcttctcaac

aaataaaaaacgagtaagaatttccaattcgactccgacttgagaaattggttaaatttccaaaaaatcgttcaggaacagaatttgattg  
caattaactaggatcctcaactttcaattcgaaatcaagagataaagtgtttataatagtagtataataagaacctctttccaatgatctg  
cttgcttaggggatgtactatcgaaagtggaaacctgagtggttcttggtatttttcagttcgttatgtggctagtggatttctgacaaaaggc  
cgcaagttggattgctaacaagtttattcaatcgatataaatcagtcctttgttgcatcacagttagagaatcgatgaatgaactgaaagc  
ctttaaggaaacctctgtaaacgggacaaggacgtgtttaaacaataaaaaaaagaaaagaagaaaattatatacatataaaacaga  
tgaataaaataaggatgtgctgtaaaagatcgtgacacacattcaaaatctgtttatgcttaaaactttgtttttccattatttgacctaattatac  
agtacttatctattattgcttattgtatccttcagtttaataactcaaaaagaataaattttacttatctatttttaagcaagtgtatgtttacatg  
agcaaatagggtagggttagcattgggaagagaaagaatgaagttgctaaagctattctctgcatattcaattgccagtgctactatagtaa  
tcatgtctgacgaacaaaagaacaagttcaaaccgctgctgtagagaatcaagcacctcaagaaggtgttctaagactgaacaaaccacag  
agtctacaagccagctgaaaccgtttctggaaaagctgaatctttgatgaaaatgaagtttaagcaagtgaggtaagtattactcaaaaatc  
atgtgataggaattcgctagaaaatgggcacggatttcggactaacacacgatgtagaattttacttttctgactccaactgctctgacaagtt  
cttgaggactgttccagaaaaaccaaggtgggttctatccaaacgattgcttctttaaagcgtatgctgctatcagcccttagaagccgttg  
tggccgcttgcgcaagagcccagagttacttgaagtgatgaagccggcgaaaagggtcgtcgaaggttctatcgttcgtcctgatccttctgc  
tatacaacgttccatgaaaagtagtgtatgtcaagggctttggtaggaacaagaagatactcaattgtattggaaagatattcgaaaaag  
aaggtggtgaactgcttctcttctgttgcgctgatgacgataacaagttcaagggcagtgttttgtagaattcaagactcccgaattgcaa  
aggcttttgaaaaggtcaagggatctcattgaagttcaatgaaaatgagttactatcatgtccaagaaggaatacgtggatgaaggctg  
aacagcatcgcaatgatcctcctaagcctggcaacaaacgcagacgtttgacgcctttaaataatgatggatcgtgagcgtccagcaagcgtgct  
cccaagagaggaaaaactgcttataaggaaaccgaaaagcaagaaaaaccaaggaaaccgagactgttgaagaaccaagaaggctgaa  
gattctaagaggctgaaaagctactgaacaaccaaggccgagggagaggctgacgtgcccaccaacgaaaaagaagaagccgctcctgct  
tcttctaactaaaataagataaaactggttttattatcttttgaaaagttttattttaaggaataaaatggttagtatgggatgaaactcagga  
aatgaaaagtaagataagtaaggttctgagaggaactgacttgaactgtattgcttcttctgtagaacgactgaaacataattcatcacttt  
ggttaggctcaaatttcaggttaaatagtagtattcaccttctatataaattttggcaatgaattgcaaaattgctccttcaaaaaataacagggc  
tatgaagagtgattgacaacattaagagattcattaagcaagacgataaacagactttcgcaaaatttcattgaaaagtgattaattccttcaa  
aacttgaagttgacaaaagaaaaaggccacatattcatttctggcatcgtatatactcaaccatttctagaaaaaggaaagaaaaataatga  
aagaacaccatagctatagttacaactctgcaagcatttctcaattttattgcatactagattattttattgttagtaagtggaacgatgta  
atggcaaacctcctgaggaaactattacgttgttatgtaaaagaacatactcaccggaaaaattggtacacgtaaattttaaaaaagtatatt  
acactacgaaaaagaatggaagctcgttttctgggagaacaattccatggttcttacctgtggtgaaacccccatactatatccaagtggggc  
gagtccttgatggaatttgtgtgggtagtggggtattgtagcggacattaatgtagattacaaaatgcaatgatcgaatcagtttaatttgttt  
acgtcaatgtgtggggaagaaagaacttacatttgaaggtgatgctacgtgctgtttactcaactattactacacaattttcatcctccaa  
gcgaaatacgcgtgaattacaatgccaagacacctaactagcaaaaaaaggatcctaagcaccaaagagaacatgctggcgttcat  
gttctttcgtactaacaagagaaaaagtaagaacgaaaacctgatgcttctgttgtagcgtcttattgaaagaacagagcgttctctcatc  
aattcttttattgatattgaaaaattcgtgtttatttgcactaacgcgttgcagggggcattggttctcttaggaaagaagtggaaagaatt  
gccagcagataagcgcagggtatgtaaaatgaaagaattctttacaaagggttccaccagtgaataaaagtctacgccactagaggattgaa  
tagtggaatcttgcaatcgtcaaatcgtttgagagcgtccttgaatgagaatcctttgatattttcaagtttttagctaacgttttactatta  
gccttacgaagaaagagcacgcaagacaaagatcgtatgaacgggaccgcagcattatgacaataaaatcatcaacgaagcaagaaa  
aacccaagaaggaacaaagcagcaaaaaagaggattaatattatcattaccggttataattattgtataattttcccttgccttttaataga  
actctataatcaattcatcttagacttttttattcctattggtcctacatggcactttagagcatattttactgcttgtttgtttatattcatcttct  
cgcgtttcttctgtagtactcaatattgtccgaaaaatgttttaccctaaatgaatgaatgaccgacatttctgcaatttttcagattattcgc  
ttgttctgttttctttttccatgagtttgaataattcatttactcgttaacttttacgatttctttaggattttatgtgaatattgctcct  
gaatgtttatattaatttagttttatgcttcaatgagtaatgttcttcttcttactataaagaatcttcaatgaaaataaccattacaatat  
acgtactgcaactataggtgattgctcaagcaatggtaacggctgcaatcgttgacacttagcttgaatacaaaagcgaatcggctcattc  
attaccataagtcgtactctgtaaagttggctatttttagcgtctcgtttcctaaatggcaagaaaagaaaatactgtttattaagtttatagtc  
cctatcccttatgcaagtaataactaaagcttcatgtattcaacactatgaaaatacataatgatcgtatcgtgcttttttctcaaaactcattgt  
atataataccaccaacaaggcgtatataaacttttctgtaacttaggaatcatccttagctggacttgtgttgaagtagaaaattccttgact  
tcatcgttactaacaggtttatcattcgaagaagctgcatcctttgcaggaaactcgtccttctccttcttttctcagtagtcaaatctttgtaga  
catcaggatgctgttggaaacaggttgcatagcctgaaattttcaagacattccatgcctttaggctcacttttgagtagacaagcaactaaa  
ggcggccttgaactctcccacagggaccatgagcattcccccaacaagggaatcccagtttaattctcgggttcaggatcaaaggcgg  
attcttactgccttcttcaacttcttagctgctgttattgttacctgtcagtcgaagtcctctgctcaggaacgtcatcatcggagtagac

gctggcatcagagtcaagctgttttgatcattattgcttgttcttctgggttttaggttccatgcttttctaccatctcttcttcttctgcttaatt  
ttgcttcaattgaatcttcaatgcatgttggcatatatacgggtcattgtaagctattatgttaataaagaaataataatcatataaacctct  
taccctgagtttctgttcggacatgctctcaacataggctccgttatctgagtcgggtttgaatcattaaacaccttttattgaggtaaatccaa  
aaaacaatgatagaccggctgcccctgataataggatgctagttggctccatgaaggagcagctttgctcggaaaactgaactggttattgga  
accgttttgaaagctgctacttaaacataatgacttttctcaaaagcagaatttcttggatcgagttcttaggaggaaaggagctttccacg  
aaacatggtcttctgtaatttctatggttagagacttggtagaacgcaacgatatactcaagagaagaatataagctatcactactctgat  
tagttgaacaataaaacgaagcttttattactttagcttagtttaattcagttatcaacaataatccataactgtactataaacgattgtctc  
acaggcattaaatcaaatcctaattgaattcaacaaaaactaagttctattttaaactaagaattatttattatgttactgaaagc  
agcaatcggatgctcttttctatattcaggaaacaaaaatatacacatgtatgattctatctgtgctaaattatacaatgtttgagcactc  
agtaacgcttaattctcttaccacaataatcaaccaacgctttcattcaattcggcaagaatttctgtcttaattttagggcgacaacaggtcc  
atcgtaaaccaagagcagtgatacttgaacatagaagcaccagcggagcatattcaatggcatctttaccattagaaataaccaccaagccga  
taataggatgtcagatgacaagtggttccgtaatgtacggagggtgtcagagtaatgggcttaaggaggaccagacaaaccactgtttctt  
gaactgtcttggtgattttaggtatcaggacgttgaatggttagtggtccgacgattacaccgtcaaccttgcattttcaagacagcagcaat  
gtcggcaagctctgtttcggacaagtccgggagcaatcttaaccacaagcggaggattaggagcattcagcttattcgcttccgcaatggtg  
acaatagttcagtaaggcagactttcttggagactacggagaccaggagatttggagaagaacattgatgacaaaacatcggcataattg  
ccaaagttgcggaacaccttataatcttcaatctatttccgttttcttcttcccaagttaatacctaagcttcttgggaagtaagctacgc  
gggacccaagaacagaggatcagtgtaagcagcagggttgcacgaaatcttcaaaagccctggctgttttagcaatatacttccgaat  
acgctttgaaacctttcgagaatagcttctgtaccttgtgagttaaagccataacggttcaccactgctaaatcgggatccaagcgaagatctc  
ggtttgggattaccaggttgggcaaggagtgacagaaccaacttcaaatatgaaaacccgaaattcaataaacggaaatagcatcagcct  
gcttgcgaaaccagcagccaaaccgacgggattagaaaatttcttcccaaacctctacagctaaagcttggctgctcaagagtaaaagtcacga  
ggagtgatgccccagaggcagcaagaacagctacgtgtgagaaaactctggcgtagtaaaagcatggaacaatggcatttcaatgcgacca  
tgataaagctgcgtacatcagacatgcatatcatccaaccggcagagaaactaccaagtaagctcaaagctccaattgcctcgaaaa  
aagaatttggcttgaagaagcagagtgtaatttagactgaaaactttaccacgtgttgaatcgtttctggaaagaagacgataagcattg  
cgggacaacatattcgtgaatttaatagaacgacagaaatattgcaaatatgaggatcgaatctaagaacccaaaaaattaagaataaaa  
acaaaaggtacaaattatacggaaatattaataaaagcaagagagaattagcaagaatgaggttctgatcggtcgtatataatcggagg  
ataagaaaacgaagatgaacgaactgctaaagaacgatgaattatagttaaattcaaggcaggtcaaactcaagtcgaagcagaggtat  
acgctctgagagagaatgcattttgagctgtaccataatttgttacttggattcaagtaacagtcagagattgaaggattggattttcata  
taacaatgtagcagagaaataaacagttcaatgaggaacaaatggatccattatgggtattcaagatctcaaatagtggttctgaattgat  
ttcataccctatcggctcagtttcaatagtaacaaataaaatccaacagttttagactcgagaggctacagaagcacatcgacgaaaatgga  
gtgatattgtatgattttccacctataattgcatctacattacagaaaacacttgtttctatttctgatcttcatgaataacgctggcactaatt  
ttcgtgaaacaaacattccaactctgtttcaaaagcagatattcttcttataattttccaaaagtacacaggattaaataggtcgtcaatgc  
ttctactatattcttattattcattcttcttcttcttcttacttgtattacgcaatgcaccgctctaccctaaacggttgccatcttccagcatg  
cgacttctctgggataatccgacatgggagctgtcttgagtccttcaatacttaagacgcgctgatgggtgagacctatgtctggaaggca  
atcaaatatcaggttaagtacaactattagaggagctcgttgaccagatttagcaagttcttacttgggcccagagcaagcgcgtaaaaaacga  
actccagctgctccagcgaattcagagaatgaggacggttctcgagtaataaagaagaagaatgatgagaaaactagtggaatgatgga  
atagcagttatggagagaagagaacagcagacgaacttgagagctgaaagagggaacatggagaagcgaacaattctatggaaccaagc  
gttctaaggttgatggctgtcattagcttcatcgtcatcttcttcaaatcttcttctgaaggtgaaccactcctctgagattcctcctctatt  
gctgaaccaccgtagagtctacgagaaaacagcaacaaaaaggctcagcaacggttgagacatggatctacttttacgaaaattgaga  
agactacaagcgtctggaatcatcgatatcatgggacttatttttaagatgctgctgattatccaatgatttacttctctgtatattgga  
gcataaataaggtatagtagcaggtccattttccgtcgaatgtataactaatgagagaaatagctaggtccagattactcgggaattgaacttggat  
tggtgaaagatcatcatgaaagccgttccgaatccaccggccttcaacaaatcaagcaagcattccacaaagttgggatttgggtc  
tcgttcacaaacatcccgaacatcagcctactatgtttcaacctgctgttgacgctacctttctgtttgattctttaaagtcaatcgacaaa  
tgtccgaaatcagctcagaatagaaaaatcggcttaattaaacgattactaagctctgtcaaggtgctgagccgaaatccttaccgagctt  
tagaaggaactacgttacagtttagcagagaagaccatcctgtttccctagcaaatgctgtgcacaatatcacgctgacaaaaacaagtt  
aagctgtctcagcaggaccgtatccatgctgaacaaactctcgcgatgtttattctcaactacctctgtacgacattattgtcctcgggtgattga  
acatggaatcgaacatctcgcgagaaacttgaagctaactcctggcgtccctacaaagccaatgcttgcacaaaccacaaaacagttcctcgaa  
gttttagatacgtttgatcaagctacttttacttgcgaatacaagtagcggagagcgtgctcaagtcattttaccgaagacgggaagtttacg  
gttttctgaaatccgaggacatgtccgttctgctatccgatattatggcgtccgtaccagatggagaagccagaagctacaagctttatcct

tgattgtgaagctactgctgggataaaggaaacagaattctcccttcaaaaactggctaccgtaaaaggaaagacgtaaagtggaa  
gaaatcaaggtccgagctgtctcttctgcttctgatacttctactgaacggcaaatcattgctagatattccatttccagagcgtcgaagcactta  
tatacaatgtttcaacctcacaggtgagtttgatttctgaagcatagtgaccaacggctgttgagtctattcaagagttcctcgaggaagccg  
ttaaagagtctgtgaaggtcttaggtcaaaatgctgaaggaccggaatctcattatgaaccttcgaaaagatctcgacattggttaaagataa  
agaaagattaccttccaggcgttggtgactcacttgattgattgttgggtgcatatcatggaagaggtaagagaacttctgtgtatggcgctttt  
ctttgggtgctatgacctgatacagagactgtccaaacagtttgtaaattaggtagctggctttcagaagagcaattggagcaatttcatcgcc  
aattaagcaaatagtcattcaaaaaaagaagatttctattctcatagtgaggctccccctcatcaacctgatgtttggttcgagccaaaatattt  
atgggaagtctgactgcagatttatcgctctcccctgtctataaagctgccattggttatgttcaagaggataaaggaattagcttccggtccctc  
gatttggctcgagtgcgtaagacaaaaattgggaggacgctacaactagtgagcaggtttctgaatttatcgctctcaaatgtgcacaccagg  
cttcagcgcgtgcatcgctacctaattgccaagaataactaaagaaaaattgctagctttaccaactacataaaataagcccaacattaaaactg  
gacatgttactgtttttgctctacaaagcgtcaattatgtatgtaggaattagattattatagtttcccttcaattaatattccttttaattgct  
ttggttatgatctaacaatggaatttcaaagggttaaatcgagaccaatgccgtattttaaagtcaataaagtgtattctattttatatttcaa  
ttttcattaacataatcctttactctcagaaattcaatcataatgagattggaatttccctagttcagcttagacctcactcctacattgtcatt  
cttacctaaagtcaatgtgtccgttaacgaaacaataattgagactaaagctggggtaaaaataccagtaaaaagatggagaatagaacaga  
gtggccattaaagcatgtacagcctctagagtttcatctgacatcaattgtcaaaagtcagtgctgatcaccttccctcgtgttcaatggttta  
tgcatagatcgacctgaagaaaaatcaaaaaagggaagtctagaagctaaaaaatcaaaaagttttaaacttttccgtcgaagactctgacc  
gaatagaagctgcctacaaaacacagaagacacggatggtcaatcggaacaataagggtaaacgaggattatctttatgctgtgaatgtaat  
atcgaggggaagtatttcaatctattgggatgggctgtcttctgattttaaagggaacctggttctatgctagaggcgacaaattatccggtg  
aggagaattggccattcaagttaggaaggatacttaaatatgtccttatcgtaaaaagttgaagaaaaagatgatcacagtatgtcagct  
caaggcaaaactgggcttacttgaaaaatatactggagcatttattgaaatctgggagatagaagcgaagaatgcatttggaggattcta  
tcgaaatgtgtcaacaaaattattacaaaatgtcttattctagtaatcatgaaagtgataagcttatccgaggatacagatattcatcctctaca  
taacagatgctaaatctactacaagctcaacagtggtatgattaaagctcctctagtagcattggtaaacgattcttctgaaccgaatgaattacttc  
gccttctgactgaaccagcatcggaataaccaacctcgacagatgcttgcactaaagcttccactgatcgggaaattaatcaccttattcta  
tggtccatggtattggctcagaaaatggcgagcgcgtggaacggtaaatgttacgagacatcaatgaattcggaaaacactaaagaaaa  
ctttcaatgcttccagattgcaagctttatctcaactcaaaaggtggcgaaatgggattcaatgccttccattattatggcgccaggatc  
cacttggcatggcacgagacaataatctgacattcagaggaagaagaatcagacagtttgatgtttcaaaagatctgccttgacgattg  
agcaggatcctaaccacttagagagcattaatataccgacctgttaggattgagaagcataatttctgatgtttacttagacgtgttactct  
actgtcaacaaaatagagagaggatttagttgctgtttaaagcttcaatcgtctttatggttatatgtgaaacataatccctcgttccagg  
gtcaggttctttgttaggtcattccttaggcgcttgattttatcgacatagctcgtttccaaggaaacataaggatcccggttcagctcgatt  
ttcctgtaaataatttttaccctcgagcctcttggccttttcagatgttaaaggaagcggattgcaggccagatacctcgttctacgatta  
cgagaagtgttagctattcagaagcaacttgactcatcagtttctgttctcagctgcaagaattttacaatataattcatccaactgatccgatt  
agctatcgctgtaacctctatagtgaaaaaatggcacattaaagcctcagagtagtccgatttagaccctaaagtcagcagtagctctg  
gtgttggtcagacttgcggatggtgattaaatgtgtatctggattacgttccggtatcgcaaaactttagtttgaatctttgagctatgat  
cagttttaaagcacttccaatcaaaaagtcacgttgtgaagaaggcaatcaagcatatcaaatgatgaaagaatgatcgtttaaac  
aaaactggcgcgtgactttatgttacaagaaggatccttagacacatctatagttacgttctgcaatgaatgcgattcgaattactggaaaa  
acgctgatttggccattttatataactcaattactttaattttacactgctatgtaactgtcagctgtaaatgatcgagcttcattatata  
tggtatttggtaagttattatgaagaagcattgctcagtggtacagttaaagctactgaacgaaatatttttagttctaaaattttatct  
atatttttaactctttattataaagcctttatacattttccactgtaaggatacgtcaatcaaatgtaacgtaaacctttgctgattacttatctg  
agttcgttataacgttggatatactatgaaaagatcacaatcttctatcctctccaagtgtttaaagtcaggatttaataactttgtaaatt  
aaacaaggattacgaaataaggaccttaatgaagcacttacatataaagcctcatcaacatagacactgtcgaattgaacaagaccacata  
acttagagattcattaacacactcttcttatataatacaattctttacattttctaatggacataaaaaggcattccgcttacgacatttgcgagtca  
ttcgatagcccgaagaggaccttaataagccgttagtcagttatccacctcaacaagaagctagtgatggccgggaaagcttagaagaggt  
gcctatccgagctactgacaccaacgtggttattccttagaccagacaacccagtagacgaaacttctcctaaagaatttcatgaagaaaaga  
ttagtagttggattggatactcaacgggtgctggcatttctggtttgctatttggatagacaccgggtgaatttctggtgctttagcagttatagg  
atcggtatcggaagtgaattaagttcgaacaacgagaactcattacgtctgcaactcattcgggcttatttgcgggtattacttctggttgg  
cttgacagattactaggtaggaagcgtttacttatgtatgctgacggtatattcgattggggctattgtaatggcagtagcaaggaatagacta  
ctctagtagctggtcgtttattgctggttggggcattggattagcttcttaattgttctatgtatattacagaattggctcccgtcacatgctgg  
ccgacttgaattttatgttgtttttattacaggaggcaattggttgcctattcattgaaatgctgacattgaaaatgaaggcaaggttggcgtat

tatgatgggattgggagctttaccagctctttgccaactcattccgctctttggacaccggagtctcctcggtatcttctaaacaaaaccatgttg  
aaaaggtatataaaattatgtcggaatccatccgaatgctagccaggtgagattgcttacaaggctctttgatccaagaaggcatgaattta  
gttccttagaaggtaataatcagagagtaaaacactcgttaatcgctttggcagttcctccaaccgacgatcactgttcattgcatgcttc  
ttcaagctttcaacagttctcggtacaaatgctattcaatattttctcgatactttcgaaagcgttggctcaaaaaatcaatccaatcagta  
ttgtcgttgggcaaccaacttctattcactatccttgcgtttatgttattgatcgaattggtagaaggcggatattattgtatagcgtactactat  
gataattgccctttcagttgtgctggttcatatcattttctcgagctcaagaaaactgaatggaaatcgttacactagttccattattgcatttttg  
gctagttatgctttggattggtaacataccttggcagcaagctgaattattcctatgggaagttcgtgctttgggaacaggtttctctacggctgta  
aattggctggaaatttgatcgtcagtgctacgttttgacgatgatggagtctatcattcagttggcactttcggattgtatgctggattttgctc  
tcggtcttactgttttttacatccggaatagcaggaatgtctattgaacataattccatactttggagaaaggattctggaatgccgtaa  
aagaacaagataataaaagtaagaacgagatcaaagatacttactagtttttattgcatgtttattgttatcattagaaggcgtatttggta  
gattgtattaagttgagcgttatgaactaattatacataatattataacataattttctttataaagcaaaaagcaaatagtaaagggttaagaa  
agtaaactcaagtcttctggaatcactatgcaaaagttgctctgatagaagttagttaggaaagtaattgtttaaaaacttacttgaccatca  
ccgcttggggcgctttccaatcaatgccttgaagaggatctttgatcaacaagctatttcatcattagtaaacttgaacctataggtaaaatga  
aagacttactttacaatggacacaattttgagaattgataacgaaacgctttccagtaggaagtgtctcatcagcactcatatacaccagc  
aggacaaaaacgagattcaacgcccttgtattttgataggtctttgacgatcattgggacgacgatcaaagagatgacaaggctgattctcagc  
atgcatagtcctgacagagctacagacgtaggaatatcgaatgaaagaacattgtcaggcttcgggtagttgataggtttatagaaggcac  
ttgtagtaacgacatcgtctcctttcttattggctaaaagtccaaggtactttacctttataacgtatgattctagggcagaatatacataccaccg  
tagttcctaagaagggaatgcgtgaaatgatggccgaacgtttcgtacagaatataactctttaaaaacaaaagaatttttaattttctcat  
aagtattaatcgtaagtggtttccagatcaccagttataaaagcttcaacaattgcatcagcagcaccatgccggattcatagctgtgtgagt  
acctttattttgggaacattaagaaatcctgcactacagccgatcaaggcaccacctgggaataactaactcggaaatggattgtaacctcctc  
attcaaacacgagcggcgtactctaaacgagttctccttttaagaactttagcgtaaaagggttttgcttctttgaaattcagcaactgga  
gacacatatggattaggataatctaagccaacgaccaatcctacagacacatagttatctcgaattggtacatgaaaccaccgcataggtatc  
acttcgtaatggccaaccaagagtggtggcagctcctccatacctaaagttttcatcaggacacgcaaaacttctttatacctaaagccgatgtt  
tgtggctcacaatcttttgaagggttaaagcgttgaatcacagttttgataaagaaccgggcacttcagcaaatagcgtaatgggagcatgg  
aaggccattcctctcaaaattatcctttgtaatccttgcatacaacacaaagtcgttcgtagctacgcctcgcacggatccatcttgattgat  
aggacctcagaagcagcaaatgagggatacagttcgacatcagttctcagctttagcagctaacacttggttaattctgcaagctcataatg  
taatttcatggttttcataatggaggaacaggcatagggagttgcataccaggaactaaaaacctcatgatctgatgaaacaggcgtgca  
atggcgaggtggttctgttttccaatctggaaggagctcatcaaggcagtcggctggataactcgcctgaaacgctgtgattaccaggttcggc  
agcctttccaacacaattaccggatttctctaccagacttggcagcttgttttaatgcaattgccgacctaaccagctggctccggcaccg  
acgatgcaaacatccacctcctgcacttctcgttctaaagactgtatacgttcaagttatctaacagttcattaccttgaacaattcactatgaca  
gaagttcgggcttgattctttcatggcggtacatattgcgttttaaccttgggaagagcaacgagaagcgaacatcttttaactctgtttac  
ggaaagcacttggagtttttagggccagctaacgttcgaaccaggttgcctatggttatcacgccttttcttagaccaaatcttcaagg  
gatgtcaagaatccactaacgtataaagatggagcaataatgcttctgaaaaataaataagttactcaaagtatctaagcttataaagtaa  
agagttgaattaccaagaatctcgagtacccttctgataatcaacaattcaaaagttagaaggcttatacgcagcaaaaacaatcgatttt  
ccttttgaatatttggcttatacagctaggaataggcaaaagttaaagcttctatgaaataaattgatacagacgcttaagatcgcac  
ttttattacctaacaatataaagctatacattatcaataaacgtggataattttattaaggatattctattttctaaaggaaaaatagaact  
cgtttgaagatgacatattgtattaaggaatgaaaaactcaatgcgtaaacatttaaatgaatgggatactgtacttgcctattgaattgatta  
acgctttctcactgtaatttctttctgatttctcagaaggaagaagcaggtgtttcatttgcttctataacgagcatgggtattgtttcttt  
taagtctaccaaaccaatttttatttttaaatctagctacttactctttgttgcactaaaaggaaaatacgcctcgcctgagatgctatcgtt  
cctcgttcttacttactgtatttcatgttaactgattttaccatagacacattatattcaagttttccatctaaaaggcaacctaaattat  
aactgtattcttctcaataaatggttaattaaatctttatattgatggtacataggaatcgcaggatgagcaatttcaagaatcgtaataa  
aagagaatgaaatgagacaaaattacaatcatatcaaaatgcttataacaacatcaccttacttggatgataccaaccgcaacat  
aattatacaaaagcagtagccgcttactgttcttattagacagctgcacaaaatagatgggaataatccttctttaggattcataatattgat  
aactcaccatcccaccatccatcttctgcgtacggagtaccatcaaggtatctccttttggaaactaatttctctggaatttgggctttagtc  
atacagagctataacataacctaaaataggttctccttggctgtgaaagaagctctaggttcagcttcgaatagccgcttcttattgaggaagc  
aggcgtcgggagcagcactgtcggcgtacgctcaacaattgccttgccttctcctaaagaactatctcatatccattcccaggagcgg  
ccttgagtgtaaaaaattcgcgctcgaccgattacaggattcggggaagtagagcgtgcatattcataatcgaggaagatttccggtgatgtcc  
taagggttcggagacacagaccgttcagcgaagctgagatggaggtctattagaagcgaagacgcaggtcgggaagtttgcagacag

cgattgtccacggcttctactgacagggttacttctgtgtctcacttaaaagatgaagaagagcgttctggtacaccacttctgtatagcagag  
cttcttctagatagcatgggagatgggtatctacttaaattgcttctgctatggcgaagcagtccttcagaggaacatcaccgcgtttccacaa  
aaacacgctttgtttgatttgcaaaactgttgctcatacgttgcatctgagcagaagatgagcagcaggaggggtcccaaggagcttcttttag  
ctaagccatccactcagtagaagattgattgtgcaaccagaaccaagcatacttaaacgattactagatgaagcaggttagcagttgagtg  
ttgtcaccagcagtagaagtagactgacgttcttacagacatgctcagatgagccattgcatccgcgattggatcgctacttttgcctcagtac  
ccttgggttgttcaggaacatcgcaaccttcaacatgttggccaacgtttaaactactgcttgcctggggcattctcatccatctcatccgaa  
tgacttgagccaattgctggagaaactggctcctcaatgagctttaaattggagaattactacggcttcgatactagaaaatgtagatccgaca  
aaaggagaagtagggcgacctatgcttccataattgatttccgcttaaatagatccatactgctttgagagcctgtccatgacgggaaaacga  
cggtcttgatacttactatataaagaaggaggaggaagcttgcceaaggattgcatcatccaggtcatttttgaagatctatcttcaact  
ggttcaattggcttagtaggaacaataaaggcgaagatgggtcaccaagtcaaactgttctctacttactggtttgtgtgggacagtag  
ttaaagacggtaccgaaggagattccttaaactcggagtttctctgggaatcatttcttagttcaggaacgctaaatgtcatttcgggagataagg  
actgttcaaaactcatgggttgcattttaccagaaaaaggagaagtaggaggggaagcaagttcggatgaaaaggagtcggatttttattcta  
ggagatgacatatgaggagatgcagacagcaaaagcagaagaaccagccctgaactagcacgataaaggctgggagctttggaagcaattga  
ttaagatgcacctgtattcattctccttaaagtagttgttcttcaggaagagatggtagctttgtaccgggtgactcctttgaataagcaagt  
aatgtcattggctacattagtttctcgagagtaagtcgaatacgttcacaagcttcgctcatctctgacacaggcggtcgaaataatgtttgcatatg  
accacatattgtttcagaaactcaagtcgatacttcaaatgctgaaaagcatcgcaaatcagtcctatcaaccagcttgggtgact  
gtccgtaagagactattagttcacggctactcttttctgcttggactgttaacgaggcttgcacacctaagattatgcttccaattctcgg  
ccagagatcttcgacgtaactttaaataagttatagcttattagcgtgactcataggcatcacttttcagaaagatcaatttccaagctgt  
ctttgttgataaagttctcaatggcatctgtggctagggttctgttggagtttgagaaataggtatttacttttcgagaagctcttttcaa  
tttgaccagaaactcattatgagcttgagacatattactgtctctgttttaagattccatattctgatatgtagtccatattctgccagctttgg  
agtttccgagactagttcttaatttaaagcattctctcaatagcagccctatgcaggttagtaagtattaccaacacacattaaaattgg  
aaaatgttgaactgttccgcttaaaaaaccaatgcagctcagatacgcagccgaatcactaacaatccatacttgattacagtaatgcc  
gctggatgtcaaacgggaataaaatcaacaatgaagatcaccataccttctggaatagaacctgttaacacctcaatgtggaagagaaattct  
tgtccgagacataagagcatccatgccgccttcatatccctgattataccagtcgtagagctgtccttcgggtgaatgattttaaacgtacc  
caaaaattctcacgaaactcgttggagatttctgtatgtaaggagcagcttattctcatttacagcaatatctgccattctatcaaaaaatggc  
ccaatgtaccaatttctgttagttggaaagtagggaggtgataacagagaataaacaattgtttacgctacctctgcatagcaaccaaacac  
agcaaccgttaccttacttgattattagtaaaaggagaatccatgataacgttagaacgcttcatattttaaagcactcacagatttca  
gcgattgagatcccgttactactagctttctcagcttgcggaccgacttataatctacatccttctcaaaacaccactacactcgcacatc  
gaaaaatttaagatatttgccttggtttattttgtatatattcagaggttacctgttgaacaagagaatatagagttcagaagccttaggga  
aaggcatgaaagattatttgaagaacctttatacaataaaagcagaatgtcggatagagagataaataagttcaatgtcggattcaaatc  
attcattaccattagaaaacaagactacagctcctaacgactccaaaattgagagtagttgaaagctcaaatctcttctgttgccttaccg  
ggaagaccagtagactaaactgagcagattaggcagcttattaataagaatgcgccaggcgtatatcatcatttctgctcgttttagtgca  
aggtaattcctatcgtatcttggtagctgggaaatcatctgatggttttagctacatacaaatgttgctagacgagcttaagtcatcaaaaatcat  
gggcttagcagggcggttcagcagatctatctcggggtctgattccgaggtcttgaagatttcgatattgagacgcttcaaacactttcaattt  
tctccttagaacgctcaaatatattaattggtttagctacatctgtaaaaccatcttcttaagaaggcttcggcttataaaggaagagttcag  
cccttataaaccagctcgaatccaaatcaacaataaactggaaaaagctgattggatattgtagagatggtttattatcatcagattag  
accgcatacccctgattcaagttcctaaattcgattcgggtggtgagaagcgttttagctaatgtcgcccttactgctctgtttggcaattaaagc  
attcgaaggcaactttaaaccatgaaagaagccatcaaaagaaatccctccgaatccgattccgaatcagatgtagcttcccttataatt  
cttagttgctattcatgactatggctcctgggacacagctttagttgaaaggcagttgtctcggccttcgaacatttagattgggaatcaatgctt  
ccgatgttgataatcctaagttcatggttactggaagccctagctcattctctcatgacaatttttctaatgcttttaagctaaggcaacgaact  
ttacttttagatttcttggaaatcttggaaagacccttatctcagctatctattatttgcgatattttttgacgcctacttgcctatttgatcaag  
gagcataataactcccattgttctgttaatgatttggatgactatagtgaaagacttataactatgctaaaggttatgaaaaagtaacctta  
attgcttggaaactgctcgtgcttctcgtatttaactgaagttgttactacgaaactccttattctcaattttctggatgaaaaatttctgcc  
gaactttgttttgggtactctcagttacctatgccatggaaccaagttcaagagcttagcctccaatggttgcagatttttctactaactttt  
cccaacataagtttcttccatagaattgagcagatgaaccgcaattccttcttgcatttttgcgaagcctatggctaaagacagcatgctgatc  
aatcaaatgtcaattttatcgttgaataatatttctgagcatgtaataatgtccaacctaactcgttgccttagaaattgctgcttcttccg  
ctcgtaaaggcactaaatttcaaaactggctttaggaggttactgagttcaagatgctgaaaacctgaatattttctggtttaggttttagac  
tttttagtggtccatgctgccttacagaaaacaccaactgaaaacgaagatgaacttatacattatcgattgacgtagtcaatattctttaaacta



cgctaattgataacgttagcatttcggaagaggtcagcgagcacattaaggatgtacaatactttgccttcaagttatcctcgccttttgcctt  
ggcatgatcgtgatcttattatgaatgctaattggtacgaactcttctccccgatgtggaagctgaagtagaatcttttccaagcttata  
gagcgaagctatccattggtaaaattgtactactctgcaactttcaaaaaatctgataatcctcgagataggatctttgcttgttgcaaca  
cagtctgttgacgaatatagattcttccctgactatcctttggaggctttggcttgaccgctttgtttggcagttgattcagttcgatcttctt  
ctttgtgccgtaggtgttgcgttgcttatgttaccagctctttaaagcctacggactctaaaatgttaggtttggtatgcaagctttagtaca  
atctcaagataagcttcaaaagtataaaactactgtaatttgattttgggaatccctctttacaattaactcgactgacattataactccattaa  
agagatgattgcttccgcagaaactcaacgatggaggcagaaaaggcgcttatgataccggagcccactgctctgtagtccaaagttacctt  
cctattcattcgtttccatcagagtaccagccttatctttcctagtgtcagcggagaaattcaggaaacagtttgcgataacattctttcgtttga  
ataatttatctcaactaattttggcgaaaagtgcagattgtcaagaaagcctcaaacgccttatttagcatggttttctactatagtcacc  
caacgtgtagtgcgggaagcaatttcttgccttataatagtaggtttttggaagagttaaaaaatagcgattatataagatcgatttagagaca  
cgttgcaagcggctttggacatcttgaacttagatactgagacattgcttccattgaaaagtcaagttgaaaaaccttggatcgtggttaggaa  
gtataactttggctaggaataagtccatcactacactaaatgtctcatttaaacctattgctagaaggtattgatagtgagagaattgaccggg  
tgcttctttgtctgtaaagttctgaaaaggttacctgtcagacgtatttaaacaccaaacccgtggttgatggggattttgaggtgtgtgctg  
aattatattcattcgcagatttccgtttgaaatgaaattgaaattgagttattattacagagataaaatgtcaaaatggatgacattgagccgtcc  
gaattataggaaccatttaaccataaagccgatttagagaatgatctcccagaggatgttgagccaggacttgcgaaacgacgcaaatat  
tataatgcaatatattgcgacagcatcgcctcaaaatgtttctgatccggtgtcctcaaatattggaaaaatctaaagccgcaattaagaacagt  
atgcagttaattatacagcaatcggttttggaatcatatctgctgttttagggaggtctgtaggtatcatcagccataactactaaaagcttaacc  
aaaaagactttgcagccgaatcaaatccctcaagtttatttggctgctagacagatggctaaaacatttagctggaacttggctatggttacat  
gccgggaaccgttacaatgctgatgattaataattacgtacaatgattttgcaggatgtggaacccgtacatgcagctgttgcctcaagccatag  
atgagctgtgctcagaattgtttattgccagttctatcgttgaactgtggcatccgaaaccgctgctgagattgatgcgaaatgaacct  
atgatagttgaacgttctccatagaaaatccaccccaacgttccgttctgtatcctgctggagcagcaaatctgcatttaattctccaggaa  
tattgaagctttctccaggttagcccccaacaattcaactatatgaaaattcgcactgactaagctgtttaccattatgagtaactctggttatg  
gcaatagaaacgggttacgaccagaagttgctgaggggtcagaaactcaaaatacagcatgaatgttctatggaaaacgaagtaaatcagg  
ctgcttgaattatgccgaaatctttgttgtaatgacaaaatttacaattgtctagcaagttacatatactagtagcaagaagtagccgct  
gagcatgaattcatgatttagtaaatcaattcctaacgggggtcgttcaattaaccatctattgctgaccacgtcttctttgtgtgcacagga  
atgtgtcgaattctttaaactgaaagcgttctccattgtattagaagtttttgcgcaatattagaatacatatgccaagcttcaaaaagactgc  
gattaggtttcattatattggaactttctagtgatattgagaagttgaatcttctgttattcttagtctaattcgttttggaaatttgacgactgctg  
aggtagactaccatgttctcaggtatagatgtgaaacagggtaaaggctgttactacattcgcgattgggcttcttaagactgctgttagtgg  
agaaagctctatggcattgccgggtaactttgtgaattcattgatagtttataaacaagttctatgtttactgatgaagttaaaggaagcttatg  
atcaattattgagcaatgggtaaattgcctctccagccaaggaatattggcgggtcgttgacaataaacagcaactaaatgacaaatgata  
attattttgttcttgggttcatcttttgcgtaattctgcaactgatgatgttctgaagccgcttctgtttatcaacttcataagcaaggtatcctagg  
tgacttgagtaacgctacagttttccgctgcaatctagaagctgtgctagttgcttctagaggctgcatcagcaaatgctcggattactgta  
atgttgatgcttttgcactcatagtcattgttcaataactcggaaagctaaaggagaagagaatacagagctcagttagaaggtgattttccg  
aaaaattaggctctcataactggatttttgcgcaattacataatgctatggacagattcgttcatcaaaagaccttctcaggttgtttcgcagcat  
tttatctgaaactggatgaaagcaagaattgaaatcgtctttacggatataattcatcatatttctccgtagcttctgtattcaaccgaattattc  
cctgcctttacatttgcgtggttaagtttgatcgcgatcatatctttgccaagatacttatggccaataatgagcatatcaactctttatag  
gagatttagctgcattttaagtttctgggttaaaaggatggatgataaggcgcagtttaattgctgtacaatggatttttgcgatcgtcctt  
gtcttgcctatgattttccgggcttttagcaactcattgctatcatttaattcccataattcctttggaatgtgtgcagcttgcgaaatgattctgag  
tgctttcctaacgacatgcattaccagatcctttgcacaaggctgaaggtaggaagattaccggaagtggtgtgcaccttgatctgatt  
ccatcctttcttggatgattcgggttctcaattgagttatagatcgttgggttccaataaacagctgatgtagccaaattattccttgaggc  
tttctgaaccttgaatcgtgtaacagcttaataagttgggttaattggtttgtttatggcttattcgatagccacagggatttgaatccaaac  
aggcactcaattccagccgaaatctctgagtgctcattatcagtaatttaataagcattgcaactccaaatgcccgttacttttattaacagct  
attgcaaatcagctacgttatccaagtagttatacatattatgctagctgtttcttttatacctattcaagagttcctcaaatatcaccaagaactg  
ctgatcaaggagcagatgacgatggtactattagagagaattatctgcaatcgtcctcatccatggggacttttaattacttttactgaaactttgaa  
gaatgaagattataattttggaaacacccatataatccgacgaaacgacgaaattcgaagattgtttgatagcttcatgaacatattatggcacc  
ttcagcgaacataatgaacgcaagagatgaaggaacagagattatgggtcaggtataagaaaaaaaaaacccctaagatgttattacaatt  
tagtgatttttaacgggtgaatataaaaaaggaaaaatctattctactacaagagataacgcataagaaggtggtattttgaaaaagaaa  
tgaagaaacacccgctgtgatccaaatgacggattattttgtaagatacgaagcatatagataatgattgtgaaatgcattacca

gttttgagtatgatagtggtatatatgagtaacaagaaaaaaagatgaaaagcaaaagatcggatgaaatgattcaaaagttcataaact  
tataaatggatagaaaaataagttttattctatacagaaagctaaactctagatggttttgtgtaaagaatgaagaggatggatgcttaaac  
ttgcctaaaaggagctctttatcattcgcttgacagtaaaagtagatggcttataaagagtagggaagtcaagagtgaaaagagcgttcaatt  
aatccaaaaggagcatgctagggatccagccttgagccaactcaagggcaaaaaggttgaccagaaggcactatgtattgagcgtttggc  
cccatttatggacgtgtgatcaccaggaaggtactcacgagcttcaagtcgtagcagaagcagcaagctggcgaccaaccagaatggtgaa  
gtaatcatcgccatgtgtaagccggtgtgacctccgttccaatgggagtagcaaaagaacatgaggtattcggtgaaagaagcgtgaagaata  
aacacgttacccatagctccaccagcattgtttggaccattcgtcgtcgttcatgggggtggatcaaatcaccatactcagcaatcagcgttat  
ttaaactgtacaataatccacgggtatcatttcataaagttcaatagattgacgagacaactctttagttggcaggatcaaatctgtaaagg  
aagatattttacctaagatagatagctgacggctgcaatagctggcagtaaaagcccgaataattttaagcactcatgatgcaatgaaaggaa  
aaacgaacgataaaaaaaagtggtttctgtaaatctttctgtttccaacgcgaagcttatagcagcagttatttgttacttccggttgctacct  
gctgatcgtacggtttttaatttgcctttacttgataaaggggtaaaattaataatattgcacaaccattatataaaaaataattataaggaatat  
atgattgtacagaatatcaagcttgagtaagcatataagaaaaactcactaaggaagatgggaatggacgggtcaacagaacgggagagacag  
gcatacctttggagtagactaaagtaggacagtataagcatacaatacattgttctccagcgaactctttcaagaagattctctgtaatcgaat  
ccataaactcaaatcgaatggccttctatgtgtcggcagcatagaaactattacgttacgggtgaatttactctttataatcgccatcattaa  
aggatgagcaaacatgtttgttattgaaatcgaaccataaataaactattaagataaactatgaattagatcttcagtaatttcttctgaatccg  
ttcggattctgtagtaagactcgactcgagtgtagcttggtagctgtagcttgcgatatatttctcaggtttagcatcttatcaaaaagta  
aacactcacctcaatgctattttccgtaatcagacgataaacgtgaacaggccgagttgtccaactcgatgtgcacgatcttctgcctgcaaatca  
tcaaaaggattgaaagaacaatcatacatgacgacaacattggcacaagtcagattgattccaaaccctcgtatttgttgaagcagaaaa  
ctttatactcaggattttcgtgaaactcgtctagtagactttgccttgatctactggagtagaacatctagtcgtaaaaattataaccgatgggtg  
tcaggacgagctcaagaatatctaacttgagtaactgactaaaaattaagttcgatcttctgtttaactcatgtaacaatgaaactagctt  
gtttactttccgacttcatccaaggatctccttgcaactggaactgatgcaaaagactgaattgcatacagaggatgaaagctcaaatccga  
catcacttccatatcttataaataaacttctgctcgcactaaatattgatcttccgtaagattcttttgacatcgtcttcaacgtctccggagag  
tagatagaacgaaacaaaagttgggtgattgacaacttttcgaagttgattataatatttccagactgctagatggatcattccgcagttgaatca  
attttctgaaagaccctttgactaggttccatagaacaataactcaacgtgctggattttcttggagatcagacaaaacatcagccttttgcga  
cgaagaatgaaggattcataatcgattttgctctagatattctttgtgagaaagtaagcttttcaaaatttccatctgaagaaggcttaattt  
ataaattatccaatccttgcatattactatcaaacatcctaggttaacataaaggcaagtaaaagactatataatataatattagttcagttca  
aaactataaaactgtgcacatacagattagctccttcaaatattttgcaatggcgttccagtaataaaaggcgaacttggtgggatattcatc  
aagtgttctgattcttctgacatgacgatttttaaatagtgccctcgtcaaaaacacaaatctatacgttagtacatacttgagtaggattg  
gtacattaaattttctcgtgtaagaatgctctgcatccctagaacccgaagccatgatagttgttacaaaacatcgtactcgttatccatc  
agataataatcttttctaccctcctcagtttgatttcccgagattcttcaactcgtatagaaggacaaaatttagtaaacctccgaatccaatttca  
agagtagatgcaggaactacgaccaaagtaggaccttaattgttttcttctcattgaagctaaaaatgctataacctggcatgttttccaagcc  
ccatttctcgcctaaaatccctgataaatcagcatgatacattaaacgtaaccagttaacaccatcatttggtagctcttaatttattccaggt  
gccagcaagcccgttgccttccatgactccatcggtatgattcttccgcttctcacttttaggattgtcattattttgcttgttgaagtaag  
ccaccctttaatgtttgctatgaggcgtccgtattttcgcaacgattaatcaaggaatcaacggcatcgaacctgtaaaacttcatatgtag  
cattcacaactttcttccaactcagtgaggcgtccgattttgaacgctttgttttcagtaatttttctatgaacgacttcagccttactcagactt  
gggtatggccttggaaataaaatattcaacaatcgtgaggacaaccagacacatccagtaattcttgaagtacagctgttcaaaaaatc  
aagtactcgttatcatagtcagtttctcactctcattttggacttgggttcatcaggcttctcctgaagtacttcttctcactcagatt  
ggctttaccagtaactgatgatgtactaatcccttcttcttcttcttcttcttcttcttctcagaaaagttgaattacagtgaaagcttttccgag  
attagctgattcaagaggcttccggcttctgatgtccttttctcgttatattggtttggaaaaaaaggttccacagacttatcgtcttttgttct  
tgtgaagtttctcgaacatgccacttggctctttaaagtagccttgaaggtgagttatgaagaacctgttttcttccaattaaatttttca  
acttatccactatgcttttctgaatcaggaatcagcgtttaaaccatttcaattttggagtttatcattcagatttacagtatcatcgttccg  
gaaacagtcttcaatctgaatcctttcaaatccttgcctcactcaatttgcctggcgttctttctgaagtttctgtttatagtttgggaccgtc  
aatatcccagatgtcaccgattccaacgctaaaggattcagcttctcgaaaatcttttctacgcaaaaatctatatttctgatcatttctcact  
cccagcgttatgtacaggagactcttctatcggagaactgtttatagaattggttatttctcgcacactggagtagcaggaggagatgaacttgg  
gataactatttcttatttcttactcaacattacgctttagcatacttaggaagatagtgtaagaaaaaaagtataagttttgtttacaatcg  
aatagtttgcctactgtagcttataaatttagacatagcgaaaaaccctgatcattaaataaaataggagatataagaagtaatggcttata  
gtttttgttggaaaaaccagaatttagtaaatcatttggaaatatccaaggaattgcatcgcacttacaatgtaaatgaactttagacaatagc  
taatactcatcttcttggcttcaaatcactattcactattaaacataatgttattgaaatgatagacagttccataaccccaaaccaaaaaacc

caaaaaattctaattaattctttgattcttttagaagacttctccttgaagattgctcggttgttcttcaacttcattttcttttgac  
ctttcacactaaccacgtagatcccttacccttagtttattgattgtgtctcagccttctccaatcttctcatttccccaatagcatactgtcc  
aatccatagcatcaattaaggctttttgttctcacgaaggatagcatagcttctcagcaccttcttgaattcttctcaagtattgtgag  
aggagcaaatcgggaactctgttatttggcttcaattttctcattggcttccaatcttgttgcataattctgtctcaatctcatcaagcaagt  
gtaattcttcaataacttaaccaatagccaataattgggtcgaaggtaagtaaatcccgttccaagtcatcaatcgttgaattgtaaac  
aagggaagcaaacagattgttgaacaggtgaaagcttaacagctcagggattatcactaaaatagagaccagctaccttaggaagcaa  
atccataactacatgatagcaagcaaatgttggcatatgcctccaatcgctttaaactcgaagattcaaagaattgggtgaattcttcatcagat  
agcttggggacttcagacttgatgtatttggaccattgttacagcgctcaaaaactcaatgaagtaatagcggtaaagcttctgaattggtaac  
caagtaaagtcaagaatctctatagaagtttgtgcgaaagcaccacactcggtatcacgttctgccaagggtcgaagcataacacatgtg  
tgttaccagtcfaatcgttggcagctctgtctgaggtataatggacaataaccctctcttccaaaacttttgaatgttggggcacaacatagg  
aaacacccatataatgaagatatttggctgaagttctgataatccaagagtaagggtggcatagttctagcatctcgacattaagcttctcagt  
ttgtagtgcgttttctgaagtcttcatcagaactcgcttcatatttcaagaggaggacgataatcttcagaaacgctaacgaatttacctcaa  
agtagtcatgcaataactctagagcttagtaccgtatccatcttctgtatgctcgggagaaaccgcaatacggacaatacagagcaccaccaat  
gtagcaaaatcttctgtgattgttgagaacgagccaaggaattaagtcaccacctgcttctgacctctacttaatccattaaaatggagtc  
cctcgaatagaaccttcaagctagttgaataacacagataggatcaggtaatgggattcttccgggtcaacaggaggcagtaatacaata  
attgatgagcaggagcatcagacatttagttaaactattggagaattcttgaatgacttgaacgtaaaagccatcatcgtttagaagacg  
cttccgaaacaggatgataagaaaacatgtgtctactaactcggaaataatgaacactcagaaggatggggaaatccatgagctgcagactt  
ggaaatataattagtagcgtccaacagagcaatatttcaacatccctcaatacagatctccagctgcatatcaataggttcatcaaacctgatt  
tcttcaaaagttctccgtaatcgaagaaccgttgcagaactatttgcatttgcgaaatgatgcgagattgctctcaagttgttgaatagctt  
aaagagagagaacgaccagtccttctgtagccgttgatgggtggaagccataaataactaagtaaggccaatcaattacgaaccaaaaggcaaa  
gggatcgtctgcttcatcaataactaactcagcttgacataaaacattggaatcttctgggggatataatgaaatcgtctggcgatggctgc  
gaaaaatattaacacgcacaatggcgttattgaaagctggattgttactggacaatatcataatcggtatgctcatcataatcaacgcatcaa  
atccctgaaaatgaattcaaaaagagtttttaagtttccaggactgggagaagtgataaaaatattagaataaccgtaagcaactgcagctgca  
atagcaagacctagcgcagcagattaccacgaccacggctagcagtttagcgaacagtgctctcaaaccttctcaacaatagattccacgaa  
actaagacagcatgggattggcaagggtacgagtaatccaacaagttcactggctaagttgtctccctaaggattctcggagatcttcaat  
ttgtttctgtcctatctcctctacaacgggaggcaaggtttcacattttaccgagatattggaagaacgtaagttcatcatcaatgac  
gagacagtttgcgaattacctaagacaataaaatctctcattgaatctagcgggtcacgtcactgtgcgcttcaagttctgtaacgagagtgata  
tccatagacatggataaagctgcttcaacgaattaatttataagcaagagaacaacaaccacctcttcaatgggtcattgtgctgca  
aggatattaggagtaatgcctcaaaatcttgcaaaaccaacattccataagtagtacccaaaatcttgcagattcctttagtaacaataacgg  
atattgggtgactgcagaaaagctcaaaaggatcctccgaataggatcacggattccccttgcacttcttctgattttattctcgtttctac  
ggtagctttaaaggttagattacaatagggacatggagtataaaagccaacatacctagtaaatccaataaatctttttatacatcaaaagt  
acattgggacgagctgcaaccttcgactgagatagtaaccaatgaagattacaacctgatctcagcttctgaccgacaacaacgaaaaact  
tcgttgttttctcaatgtcagttaatcttcaaaccaatgacatctgacagccattcttataagtgctggaatacagagaatcagagactttt  
ttggcattcctgtagtttaacgtttctggctgctccaagttctatttgccttctgaagataaaaaacgaaagtgctgttatgggtcgttaatag  
gaatagtgaaaagactttattcaaaaataaaaaaggaatcattaattataaaaaataaatcatttagtgataaaaaggtcattat  
tgaattcctgattgggatgagatctttaaagctaattcattaagattaacgggagccatggtaatgggaactatgagggaaaaataactcgatt  
aaaagttggatgctttcctgtgaagaacataggcttcaaaaattgatattcgtcaaaacaattttaaagcccagtcgaatttctgcctg  
attgaaggcaagtcgaatacacttgcttcaatacagatctttctataggataaggtaagatggcagaagggtattggcagcacaagaagtcgc  
ccagttgggtgaaatagccaagaaggctaccattcctgatcaaacgacgggtcataaatattttaggtcaccagtagaaaataatcaacc  
ttacaggcttctgtctcagtgctagatcctgatcaaacgaagaacgtatgactgactaccgaagggttcagctggtataaaggagaatga  
aaatctagtctttagctagctccaagagcaaaaccgtcatccccatcggcattaattcactccagcttacctaaaatacagttgtgacg  
taaacatatactcaattgcaaaagcatgatagcttacctttggctaggcaacctgccaaccgcaagccattgatggtagcaatagatccttct  
ccatttggctcagagtaatgagatagtaaaaaatgtcgttaaagacattatttctggagctttcaaatcttctgaattgttcaaatctagt  
tttgcgaatcatactgcttttcaaaagcactttcttcatctgaagttgattaaatgccttttatattcatcttcttatataccttttgcgaatca  
attgttatggcacgaaactgactttgcaattcttctcctgggattccaatcaattaattgttcttttcttctgatcttccagaaatcaacactt  
tgtagtaacagcctgtagttaaggcgcataccttgaacatcggcttccaatcgggagatattctcatcctcataatctttagtagcaacatgt  
tactgtaataggaataaaatcttctcagcttttgtgagttcagttttctcattctaccagtaattcagcacattctcacaatggatg  
attcacttttgttttgcacaacagtaagtcaaaaatcgatttagttctcttttccagctaaacaagtcgtaacttccgtagaaggattccgctt

gtcttcattctcattgtatccatcatgtgacgctggtagaaccacaaacgagtcaagagttggtgtttcaattctgtttgaggcgtttgagaaaaat  
catattctccctctttaagcgttttcgatacaactgtagccgctccacaggataatcctccactgaggaagcagtttcatcatcgcttcactttctt  
cattcgtttctgttaaagatggcgtccacaaaccggatttttggaaataattcaatttcactagttcatcgtcataattatctttcaatttaagca  
gcgaatggcatttttggcatataaattgcatgttgtggagtcgaaaagatacgttaactctttcatatcagtagctcgtgcacactcataccatata  
gcattaaggagtaaggatcgaaagtataacaaacagttgaagaaattgagaatagaataaatacaagatatggaattgaatagaattga  
ctttaaagaagttacatagggcacttcacaaactaacagatggtttcgtaaatacttctctatcacaatagtcattctgtaaaccaagacagga  
aacaacagactctcgaactgttcaatgtgcctctttgcagaacaagcttctcattcatcaaattcaactctaactcttttttagtcaagtattactca  
atatagtagcattatcgtattggggtcatagctcagtgtagagtgaggattgcagctcccaggctcagttcaaatccggttggccccttacc  
tttttataaaaaagaggattgcattaggtagaaattaataatccatcgtcagtggaaccggttccgtctactcaaaaaactattttctatggctcc  
tttctcgtcatatgctatgtgatcaggtcttcttttagacattctactgacaaaaagtgccgacagaaacgaagaacactcaatgaaaaataaac  
aacgaacccttgaccactcaactctcgcgaattctttgctatgattctgttactttataaatatgcttaggttcgaaacaacctgagtgagtata  
aaatctcgtatgaggttatgccaacgttctacagacaaacaacgctttctataatccttgaaggattccgtgaatattttcttaccaaaag  
attcgtatttagatcgaacatttttatcctcatgcatgaggacttcttagctttatataaattaattattctattcttcaataatccggt  
gtggtccaacggctaggattcgtcgtttcaccgacgcccgggggttcgactccccgcaacggaatttttgagattcactgaaacagttatttt  
ctaattaaacgaatcattacgatttccagcattctgtgtttctccaaaatgtcccctagcttctggtgtcctccacaagaagctgtgttaaaat  
gactattaaagagatggtttgctaattgaaagagaaaaactatcctcggttaagaggtgaatcctttatactttataagttccagaactttgatttt  
tcaaggtgatgtctttaatggttttggcgcataaagtagtgggtgaaataaaggctttttctgtaagctcgactacttttagacgggtcctc  
gtctattatgttacaagaataatcctgtttatgcagctactagataattgcccgaatgtcttgtttaacggcatgcttaattcaacaatagc  
atgtccttattgtcaaagcataaccttatcgtcagactattgtctccttgaataatgtcgttctatggtgttcaaaatcttcatatggatgcaacg  
attcaatggtctagcattgtacgaaggagggtatccatttctgatgggtaagcttgcgtgacaccaagaacaatgcgatgatcgttcaatcagatt  
ctgagctgtggttaaccaacattgacaatactcttaagtcctttggacttttttgatacaattgtcatcaatcaatgaaaggaatgaaatg  
atagtcattgtcacctcttagggatttaggaacaacattgctactagaattaacttgaagatgcccgaatctctgttatttttaagacat  
cattcatgaattttcgtaatcgtcgcatacaagatcgaaggactccaggatttgagacctatctatgtatgtgatataaaaaaaaaaaaaaaaa  
aaaaaaaaaaaaaaaaaaggaataactggaataacagtatatagaatattatcggtttattccgaaggattttattcagcctttagaatggat  
tctaaaaaacctttgcttttaagtagtcatgatttatccttctggatgtttcatgaatcattcaggattacaatcttcttccaatattg  
ttgatcgtaattttctgaaatgcatcctatgcatccagtagcaacactcactgagctgtttctaatgaaacgttatcatcgatttccgctttat  
atagagaatgtgtgggtttctgtaaaatgcatattggatttcatgctagcttccaccagctactaactataattcttttcttattctttaattctg  
attcttttttattatttttatacatctcgtctttgaaattaaatcatgaattcaacctcgaatgcagctctacgcaattattgagcagcgtatgaa  
attgtttcagcactactcccgtatcgttcttatttctcatttccaacgatttctattgaaggacatttgactatggtatcgtgaaagcatcaaaaaac  
agaagcatgaatccttcaatagatatcaaatagatgcgagacaacgttctgtcaagatccaatgtaactgctatttttaaacacttaactaag  
ctttgaaagaaatgactatcatgatcgttctaattaactggaattttacatttcttctcagcagttacgtattactgtcctcaagccggctactc  
tgaactgattactgctgtattatatttttaattttatgctaattatccttaaaactttctcctagagaaaaaagacagttatcttataaacgatata  
ttcagtataaagcgatataattccattaatcaagctgtaaagtcaaaagctcatagtagctatcgctcgttcttcaacctaaaagtagtcttaaac  
ttttcactcttataactgatttcttacaatctttctttttattcaacgtttctttttgtatatttctttttataaaagattgcttttcatgtctctg  
cacgtgcaataaccaactttctgacaaaatataagggaagacttcataaccggattttgggtcctattgttttaacaaagaaaacctgtgtcttt  
cctcatgatatacctttgcttccgaagaaggaacattgaatctggtatcgtttttggacagcttgaatgaatgaattgaatagctaatccgtga  
gtaaacaggttggaaattcctcgtcggacgaagcgaatgcgagattcaactcagtagccttaaatccgattatgatgatataaaaaat  
aaaaaaaaatcgatacgttcaaaaactgtttccatatacgggtacatatggaattatggcgcgtttcctcagacattcaggatccagtcaggtgg  
atgcacgaaccaatttaaaggggatggtagcccaatagacgtgtgtgaaattggaggttctattggatcattggccaaatcaagcaagtcaa  
ggttttgggtgcattagctcttttagacaaaacgaaactgactggaagatcctaaccatcgcatacaacgaccgatggctaattctttaaagg  
aagtattttcataaaggaattttttgaccagctttagacatcagcagcgtaaaaaagatcatgcctcgtttgttaacctgcactcgtgattggtt  
gcagtgtataaaatcctgatggaatcaaaaaatacatttggctttcaggagatttctccaaaagtggtgtaaggaaatcattaacgaa  
tgccatacaagctggaatgagttctcaaagagctgatcatattcattcctcacgaattcagaaaaggctaccaaaattaccaacattta  
gaagaaggaaggaaagctcattcccaggaacttcttcttccctctattgggtattattatcaactacgtgaataggcctttttgatactaccta  
atttctcctttattatccgaaagaattcaattcttttttttcttttaattttcttctgtgcataccttggatcctcataaatacttttttgttt  
tttgtttttttgtttttgttttcggagtacattaccatactgttttgatgcctgcgacaatataaggatgatccttatactgcgctgttcata  
aaaaaggcattctgctatcagaaaagatagaactgatttcaaaaaggagcagcataattatcctcaagttgggtgtttacaggttcatgtgct  
aacacatccatgttgaagaactagctgaataattttcgcacttataatgctttctgctatagcttcttaccagagagggcaagatccttccaagt

agtcaccaagatctatacattgagcatgaaaaagatgccacaaggaaggacacgtaataatcagtataatcataatttgcatagcagattg  
tacaaaagtcattcttcttcttctggttgcattctccgcttcatagtgatgttcgattgcttctctcgaacaacttcccttggtagaccataatta  
tccatttcatcgaaacttttgattcaaaggaggattttccgaaaatttgttgcgatgaattcattgacattcctaagagaaaggggtcctgtc  
gaaagatgtgaaagttatcaattggaagattatcactctgcacatttgttatttttctgctctctttataaagccagtcctctgtaggttacta  
ctggagataaatagcctagctcatttgggataatgtaggggctgttcctatggcgaggaatgttataacctaacatgttgtgaagcttctgtt  
gggaatgaagtaggaggtctgaaggttcatctgttctgttgaattaaaggaagaacatcgtcatcttcttcatcaaaaatcgagaaaatggaag  
catgtaagcagtagcgcaaatatataatattaggttaaagaaaacaactgcaaatatgattgcaaatgcgaatggcaagacatccttgtt  
ccctccgaaagaagatcttcatccacttcatggaattatgtccctcattgagtcctgtatctactgcaaaagtagcaggctaatatctgtaa  
tattttgatggaatcctcagattcaaaatctcgtaaagatgatgataaggtaactgattgattcccattcaaaccttctacctagactgta  
aacaacaagcgatcacaagatacactataaagtaaggaacaaagttattgactaaggaacaatataaacaataaaaattgaaaaat  
aaaaaagaaggaaagtaacttttattcaaacagctcaatctataatcaataattatataagcatcttatttgcagtatacgattttttaaac  
caaaaaataaagtaattaataaacaacaatcaaaagcttagaaagttctaaatctttttatagcagaagcggataggttataatagcaa  
acagacaatgtactgtaaatcaacatttccaaaaccagcaataataggtatttttacttaagcagccgttcaatcgttgttcgatgtag  
catctccttcatccacaagctaacagcagagcgataagatcttcttctgttctgcatggagtataacagagcggcagaatccgcaatagcat  
gcctagcttgatcttctcattatcccaaaaagtagtaagttataacataaaaccagcagacattctaattgggctcctggttctactagatat  
caatataaccgctcctctgtagcagcaacaaactagaagcgttcgtaacaaattccttctgctagaagcttccgtaaacctgaagcgtatga  
aattcaattccaattcctcgagaaccgcaagtccataatagatgctttagataaaaaggtagtctctgtgaaaagtcaaggacaagatatac  
aaattcgaggtcactggcagttgtgtagcaaccttctctacagccctaaagcacaataatcgaattcttggcattatgctatgagagtc  
agctatacgaatattgaaagcagataccaaaacttggctgaggtgtgattctatcgttatggtaattcgtgaatataattttatctttgcccggg  
tatagtggtgagggatggggttttctgttttgaatagggccaaaactagaatgtataaacgttctatatacaactgacaataatatttga  
actttccatcgtactggtaattatgcaaccgctgataaccactgttcaagttagatgaaaataattctgctattcgtacatttctcaagcat  
ttttacagtgttactattgcatgtcctttacacctaacgaaggcattatcatttaaatctacaacattttgctgctagtaggtaataag  
gacgtaaacgggtccaagttcaatgggtgggtgtaggaaaccatgtagtataagacttctatcgtctgaagagccgaaagctcaataggc  
ttgaatactagcagatttagcaatctattctttttttttttttttttttttgtgatagcaaatataagatagcgtcactgaaatagcatagct  
gaacgtttatgcagtactaccattcagattttctctgttgaagttaaagtagaataggccatatttgcattcctttacaatgaagttcaaat  
aatatgatataattcatgtaaaatacagttcttaatcagcagcaactaaagattataactacctgttgaacacagaaattcaagttagagaac  
tttcaaaactaaattataatacaactaggcaatcaaatggctataaacagtacaatagagttatattctaaagctgtagataatagcatgaata  
tcaacatgcaaaagttcaaggtcctatcaaaaaacataataatgatttaacgtttttattggatcaagcttgcagaccttcaagaaataatca  
tctaaagcttaatttaatttcaaggtcggctctttaggctattattattatcattaacaacgggacttgggtcaggtatctgaggtgggtactttc  
tttggttttccaaaactgttttaaggcgttttctataacaattttaccctgataagatgtagtttaagacattcacaagactatgacactcact  
tttcaaggtggatggcagcaagcgtggtataagacttggatcttcaatgtaacaatcaatgaagatttagccttatataatactgcacatatca  
tcaataagtttcttttagtcattaaatctatttaggatcactataagacattgttagttacctttcaacaagaataaccataaaaacttactta  
agctttccacatttctcagataatactctgtttttccaacgtcttgcagtgctcaatggctccagatatacttgcagagatgtaatatctat  
acgttttctgatagccttggtaatatcctcttcaacaatacaatcatctgatgcaaatctgttttggctccaccccgctaaagcaaccaaatcctt  
ttggatagaatacattaaagaacgacgcacagcagggcaagatcgtttataagtagtaaaacatgtatttaattaagcatcgtttttaaagc  
tccgattgaagcattaaatcataagcagcactgagcggaccgaattgtaattaccttctgcttatatggaaatagctccctcgggcaaaaatctaa  
atgaaaggttctggctaaacgattcttagcttccagggctttagttgtgataatgttttatatgaaggcatgagcagcatcaatcgcagtgctgat  
caatttctgtaattgctggtgaacatattccatgtgctcaggatcactaaatgcatactgaaactgttcccctcttggaaatagagcatcaactag  
agaatcaattaacagacagataaaatgagagtcagaaaactcattattagcattgtcattaaacaaagtaaatccaaaagaagcttcttcaca  
gaagatgtagtgacccttctgatcagggacattagcaaaagcctcaacatagcgcacttaacgtaataactcagaaatattagagaatcatt  
gcttttgggatggttgaatttccgaaacaaaacttccaaaatgccatgcgcaaatggtaataccaatccaatccagttcaggattgcaca  
gtagccagagcagcagcggcttctggcgcactccatagtaataacgggtatctagaaggttctaagtaaaaccgtggatacctgacgggaa  
attgaaaagctgttaccgtgaaaatgtctgattgtctcaattgcgcaacaacgtcagatcttgttgaattgggaaacaaacatgctcgggtt  
gacgaactcgtaatcacatatccactcgaatcagcgtcaacacggatccactcaaaagctttagcagccatcgtatcttcatcttcttggata  
atcataaagcctcatttttcaatattctcactttgaagaacgtctccaagcttcaataacatagtcagaatcataccgctgtatcaccgt  
tatcttgcgaacgtttttagctgactgttacgactgattctttgtacttggattataactgaatatcaagttcgtaaacgaatcttcaattcaac  
aacatgttcgtaaggagtagctcagcttctgtaattcgaatagtcattggctcactaaatactggaagaccggaagcaactggtcattgtttaa  
gtgccgtatagcgtcagaacaaaagttccttctgatgcgggtagtagcggagtttcttagttgaacctgatcaataaccatttcaattatcatctt

tttctgttaaactttgaacaacgcggaatataggatatccataaccatatccactgttgagcaaaaatatctaaacgcatatgactagccttc  
tcacacgttttgagaaaatgagaagtaactcaggcatccgttcaacatatcaccactcataaactgaagcaatagcttaggtattaccttgacattc  
ccaaagaaccaccagcttctgtagacgacgctcaagtagtgaattacaagcggagctttaaagctataaaaattaaaggttcggatcaattg  
gaagaaccaaattaggattagctataggaggtcgaccaatatctaattctaatactttaaacaatcttttttaacgaaaacgatgatcattatt  
ccccattaatttttcaaaaataaacagttataaaataggagagaccatatataagccataaatcggtccaagcttaggaattaagtatacccc  
tatccattgactagccagagcccaggttaagtgcttctgtagactcataaatatcatccaattagcttaggaataaaaaggaattacttgcgat  
gacaagagaaggagttgaataataggataattcgttctgcaacaaagcaaagttgaaacgcattaaacgggtaagagccatattccctcacg  
aaaaagtcctagctttatacataaacgcaacttttcaacttctcagcatattgggaaggtaatagcctgcaatttcgatagcgttgagc  
ccatcgcgtcatcttctggttctgaaagtcagcaagtttatatgtttaaattggaccagctgcaaaagcaatataattggagcgcaccggcgt  
agaacgggtggaataaacagtttttatgggtggcttccggatgctaacctgatccagtaagtcaccacagccaataacctccatgtcatggc  
ctcagaaaaatcgggttctgctacagaagtcaggggtcgtgatcagctcgtttgcatatcatcatcttcatgaggctcttgagaagaagactt  
gtccgtaaatccatttagttggctattggaagacttagagagagttccaagggtttagggatagtgatttcaaactcccaggtggaacgttcccat  
ataccatcgacacaagggagccaagacgatgtgtataggaacaatagaattgttagtgaagcatgaggatagcgtatcaatgggggtcaa  
cgccaacaaacgttatgcccgaagtaggctggtgaacagaaaactcgattgacaccaataaagttgcaggatcctcaccggcgattttggtaa  
aaaaattgataagccacctaatactcacagtagattcactgagaattcagctgatgggtgagcttaccgttactatttggttcctgatgctc  
agccgctgaaagcatcatcataaacaattagctggttatttatatagcatgaatgaacatctgtttagtaattagcataagaattggtg  
ggaatcaaagaaatgaaagcctctgtactgtattcgttcttctactggaacgtcgtacttaccagcttgatagcaatccaggacgacctttta  
aatcaggattaatgggcatgatatttatccgttctccattatgggttgagaagcaaagtcattgcaattgcaacttctgatgactgtacaa  
acattagcataatcctacacaatttatacatatattataaacccccgcggggacatccaccgattgtgacatcttacgcttataaatctaacat  
atgggtgaattttcaagcattcagtagatcttgcggatggttagcttctcgtttctgacaacaagcgtgaataacgaggtgagtgagttaaaaggt  
agctatgcttgggtgagaggtcggttagagaaagagagcaaaagggttttatttctagttcggtagtagcaattgatgtagatagta  
cttaattactcatgaagttgaatctatcatgaaaaactatgtagaaaaattgattctaaatttttaatacaaaaagaaaactactatacaatc  
gggagcttcataaacgcaatcggtatagcacttattcgtttaaattgatcacgattggaataaccgaaagaaagctcaagaaatattcattaac  
tcatacgatggttctatcatagctgggagagagaagtaaccggttctgtatcatcttatacttttaggttactcatcctttctggagcagctc  
cattaccacactaattgaggtacctgcaaatataagataacaacatcgctcctagctgacgatccattctgtaattggtttattggaacataca  
taagagtaaaaccaggaagctagcaagaaatagctgttattgatagagaatgaggaattcaatccggctcaccgccccatggttgagatgc  
tgttatacaacaagcaaagccaagacctatcaggatattcaaagttggtccccaaaaactccgctgatggcatttcaggaaatccggaacg  
agaaaccattatcagcaataaaatcacaaggtatttccggcagcaaaaacgggtcaaccctaggatagattcattcaaatccagtataatac  
ccagtgcttcaagatgcccaaatcttattggtattgttgagatccaaagaatgcttaggataaaaccggaaagctaaccatggttaaaaa  
tgagggccttatctgattagtgaaactatacagtagcacaatggccaaaaagatgagacaccactacacatcaacgcataataaaattgctt  
gccgttgaaatgtaaaattgaaaagctagaggaacgaagatgactgaagaactcgtagaggtctgaccagctgtgctgtttgggtatc  
cttccgttggcctaggggatccactgggtgcccagaaactggtacacgggttaaagtaacgtgaaagcaaaaactgaagggaacaccaca  
tatctaagcctgttctacaaagcctttttgaaaaattgcccagaaagcggaaaaagcaattgaaaggggtggagcagattctagtatatctg  
tctctgcaagtagtttaataaacgactatttccgataaaaagactgaacacttaaattgtgttacaacgtgatacggctcactcagtagc  
actaaaggagtagtattcctcagaaggagtagctactacggcttgacgagcatgcaaatgatgcaaggataaatcgccatcagctacggcat  
ttgatccatagctcgagtaggtggatgatttcttaatgctgaacgcaattccagagaccaataaaagatggagcaatagtaggtccaggcgtg  
ggagggcatacaagttcattgaagctgtgggtttgacaaaaggaaacatcatcgtcactcgacaatgacgacttccggaagttggtatcgtct  
acgagaaaaggggatggactaaagcttggatgtgatgtttgttagtaggggtttcaaatgtgaagcagcagtaggcaaatcatcatttaacga  
attaaaggtagggcaacgactaataacaggggaataggttagtaatgcaaatgaggagcgtctgtacctgtgtaattgctgactgaaggattg  
ctagaatagaacacataaacacataaaaataatagtagcttatcatgacgaagctttgccataagctcagggtaccatcacgcatcaagaaga  
aaatcaataaaaataatagtgccgtaaaagaagtaacatctctaataatggtgtttacatatctgaaaagggttaatacaaaaataactacca  
gcgacaatggcaacaatgaaaaagcagaacctaaaagctcgcaagtcgagaccgcttggagcggagcggcagcgaatgtgcttag  
cacatcgggcaaccatttcaagagctaaaaaggtaacgcaacaacggcgtccggttaactgtagaagccaggaaatggtgacgaggttgt  
ggtaaaaagtcactagcggaaacccaatgtttgtaacaaaaatgtagccaagctagcatgattgccaacccgactccatgaaacccgcta  
aatgaacagtaataatagttctggataattacatagccactatattcatccccacaatatcgttttgcaaatgacattgtacttaggttcaatag  
aaccacatcactgcaagtgaaattgtcttactctgtgacttccgaaacgtgcaataaatgtggaatagagagatcagaattagacggggagt  
tggttagattcattatcgatgtatccatgtgtagacacataaccgctgagaaaacccaatgagcagcgggttatagcgtttacaagttgtg  
aggtaacaggggatttccattcgtactgctccttaagtcatgttttagtaaccatcacaattcaggatatttaagttcataagtgaggagtgag

gatataatacggatattaatggcgagaaaactcaagaacacgtaggctttcgaagtaatatgtaaggcttagcctgttacgtagagtagtaat  
agagatatactggaccaagtactttatcttataacatagtaaacaaacacgcgttactgactgcggtattccttagcgtaaacagtacaaggc  
catgaaaggaaggaggattgttggaaaagtaaggagagattcaaaagaatgtaaaaaaagaaggtttagatatgttggctttatgatt  
ttccagatcataatatacggaacatctaaaccattggcaccttgggatgacaccttcaagggcttacttgttggaaacataaggaagaa  
gcttgaatgttcagtagcagttacaatttattagcatacacttcgcaattgcagcaggggggacaaaagtaggcacacgcgccattcaaca  
gagaaaccaccttgcgctaattgacccatttaccggccttgactcgcgatagattgatgtccattttagtagcatttgaaggcgttagcg  
cctgaacaaatcgtttaggggtcattctcctcaaatcgttgggttaaggaaaaggctaaggcaacgggaccgtgcccggactgggggagtagt  
gaagaaaatgtaccttgaacaaagtaacagaaagtaacaaaagaggttcaattaattctttttacgtggcttgaattcgataaataaa  
atgtatagaaatacgaagaggtacacgaactaatgtttgcataccaagtgaacaaatttgctgggtatgtttacgcttttataattaccacgcg  
taacgctttgactattagatcaagagtggtgtgaatgagagagaaaaagagagtgaaaaagctaataagcgaatgtaaaaatctcttctga  
ggttgacaatacgttgcctttcaacgattacgaaaattgaagtccttactcctacatacatcaattcgcaagagagaaatcagtaacaaa  
ccgaaatttataaaatctttcagctatccatttaacaaaaaattcatattcactctgtattgtctttcttcccaattcttataataacaaaca  
ctataaataatagatagactggttagcgtatcattctcctacactaatcgatattgcacttttggtagtgcgctagaaggaaactcaacga  
aagcttgcacgagcagaaacacagctcttggcgactaccaacatcttgggtttgaaaacattgggctttctgttaaggatgaatcaacc  
tgagcgttatgagctaattgagctcatgggattgcccaagtaagcttaagcatggatcgagaatgagaagttactaacaattgctcagagtcact  
tatgagttggacaataatcccctaagtctgctgtataactattgagaagaagatcatacctggcaacatgttggcacagtaagttgataa  
aaccctcggttattgtactttagcagcttaccatccactagacaattattgacagacgagcgggtacttttctggatacaaagttcccc  
atccttgaaccataattttttagagtgcaaacactgaagattgcacgcctaagcaggcaattgtgacgcagcaaggcacttatcccc  
atctcgaagaaatgaagtaactttatgagggatgggaactcaagatgatactgtagaaggagtagaaatggaatcttctgaaagtagtaa  
aatgttgtttttgattgagctggttacctatataaagtcctggaggatgtgttccaaatctgctaacgaaggatggctgaatattgttc  
aatcaaggaaaagttggtgaatccgggaaaagaaaacaaactaccagaagcctcatggcgaatgacctgctcattcatgtttcttctc  
ttgaaagctgtttaccatctttacatcgattcaacgatgatttttaatgccattattcctttctgtaatgtttctatcgtttcaggcttgg  
caactcgaggttttaatttgcgtacttgtgtttgagaatgagaatgttttattgcttgggttggtaatatatagatacatgaaagatagaat  
tagtggacaataaaaaatgttcttggcgaggctatgcttttaccaaagacgattctgaaaactcgagatttgaatgtcaataaaaa  
taaaaaagtgacataaattgatggtatcttttcataagttgactatgaaacttcaataaaaaacaattgtataagcaaaagtagaaccttc  
ttcatgtacgaatgtcagttacaacataccaactcattacatagccaaactagctgtacggtaaaatctagattgatgttttaaaacaagaatc  
aaatgtatgttttcttaggttaagtaataaaacttttactgccacggctggtgactgtctgctggtgccttttatcatggttcttcttagtg  
atgcttactggcacatcgttaggttgcctgcgagtgcaaaaaagatgtaagcctcacagattctcaacggctgttcaaatggtggaaaactgc  
agcgtgaacgagaacgtcaaatcgtttacaagagcaccttctctattcaatctcattactcatctaaactttatcgtttaaggatggtctttgc  
cttattcaaaacttactatgattctaagaaccagagtgatcagattgggattatgggaaaggcattaactggttaccaaaaatgtagcatg  
gtggagctattgcgacctgctcattgaatgctcgaactgttaaaatctaaattctgatggaaaaggctaatccgaggcgaacccaagat  
cctgtttgatggaaacctatgatgttcatactcctcctataactataaattacagaagaccagtcctgcaggtgattggataatgatccgctga  
atgaaaggctcgaagctttacaattctaagaatcagttattagctgaagcatatgatttacaacgtgagtagttagtgaagctgtttagcttg  
ataatggatcaaatgtttgatgaagtgatcttttaatgaattttcccttaatttctttaaacttacggattgttattttagtccaaggctc  
ttcatagaaatcaagaattgatgccgtttaccttccgataaccagttatgtatctgtagaaacatattacatcgttgaagcctgaatac  
ttgaagcaatthaacttgcaaatgcaaccattgatttgaagcatcactgtcgtaaaatgattaggtgttgaatattagcattattacataa  
gggtattcgttcgtcatgaatgaaaatcttgatggttgatgaagtgacaaaaggaggcattatgaaggctacacatgtgcaaaatctaataca  
gaaagcgcgaagggttccagatgaatctcaggtgcaaaatctccgaatgggtaagaagaaatctcgagcttttctgtagaataggatgcaa  
actaatgatagtgactgagcgaagctcgcaggctgcaaaaagattatttctcaagtaagctagtagtttccccattcggttcttctatttc  
tgtagtggtttaaaatcctttcttcttcaactttggcctacaaggtaaagactgccggcattcaaaatgttcatacagatcagctttac  
tgcaaatgaagagttggctcatttattagctgtaatgtgtcgcgcaaaagaacagatagattccttctcatcaaatccttttaattgatattt  
tagagatatacgaactcattgtccagcgttctccatagacttgcacctgaatagccaatcaatagtgccaacgaagaagtggtgtctcaag  
gacaaaatgttgttcatgtaattactagatcaaatggttgaacaggatctgttagcaacagacatgtggcattcgcctgaaacatgacatc  
catgagttgacagtaattctgcctactcgcgtctcttgaactttggtgcttctttagattgaaatgcataacgtagcatctttctaaatggatt  
ttcaaaagcaactgatcccagatacaagtcacctccatagctcagaacataagaattgcaaaatccagcttctgttttagagagagtagctt  
aaaggatattacagaacaagtggttaacatagtgacattattgacgcattccaccgaaattcacttcttagcagccatctctggttcagga  
cgaatttcaaggaaaccacataccaagaatcgttatcaagacaatatcaagatgttatctatatttataaagcttaaatcaatcttcgag  
aaagttgactaaaacaaatatttcatccgtcataggcatgatgaattgatgttcttggcggttttcttaccatcaattagttttattcagt

gtaaataacaaattaacagtgaagagtaattacatggaggttaataagagttactttttaacagaatgaacaataattggaaaagaaaa  
aaattttaagagcaatgcatggttcaagaagagaaatgcgacttatgaaaatgaccgcaataaagactagataatcccagtagaagggtacat  
ttggcggtccagtcaggattataaagagagctaaatgctactgctgcttgaatcatatataatcttgctaccaaggtaagaggtaacacaggc  
aaacgtgcttaagtaggataattactatagaaatgatagcggtttgacagctcacaattgacacgtataaagtaataaaagcgtaaaatcacc  
cgtacctaataagaaaaggaagtcgcttttattctcattaatttcttctgtagcgaacatagttacttgaattgcttcttattgttacttgcc  
agatagctgtcattcctcaagcaatattggatgaacacagctcaagaaaaaacaacattccaagtttgaatcctacaacatggataactg  
tcaactgcattagtagcggttagtctgaagttcggaattgtagtccaactttccaatgaccccttagagaaccatacaaaaagcattcaaaag  
tctccttaactactacaaaatctctttatttataataaactcgagaatgtctacggccacacctaggcgaaaacaccagttcccgtccgatc  
actgcagttaagcgtctgagggcctcggttagtactatggttggagacaacatgggaatccgggggtgctgtaggcttctcctttttgtgctgctgc  
tctctgttctttttctttttatagctgactattgctgtaatcgttttctcgatagaattttgcaagttgcttacaagtgacaaaagactaat  
tacaagttcaatgaaaagaaatggaacgatcgtattcaattgcaattaagaataagaataatagtaataataatcattaagaacgtaggatgat  
gccaatggctcagattacgggtccttcaatgctcgggattgtatgcatgcttctattgtccacttttctctgctgctccaattcatattgatacaa  
agcaaaggcatagaaataaacctttatcggaataaattactgtaatgttcttttccacttattgacttctgatcgggaagagtaaggctcgtga  
gaaaagaaacgcaataaaggcattaaccttgagtggtaggattgtctacagctctatttctgctgtagctcggcgaggagtagtgcat  
catcccttctgtagatctgggcaacgtaggcgaaccgggtggttcaagttgattgcaaagtctaaaccaaggaatacatgaaaactatataaa  
atccttgggcaacagcataaataatcaccaagcaatactccaacattatataatggcataccaagcaataactccaatattaccaatggcaata  
cacacaaagattatggagtagggcaaggctcttattgccccgatggcaattggatgaaagactgcctttgttagcaaacagttgatttaaaaa  
aaatgattcactacaatagaaaaagcatagaatattgccatatacaaatcaaaagaactaaaaaaccaagaagggtccaatcgtatttaaat  
ttcattaaaggcatttttagccaagaaaagggttcgaaaggataggaattgctagcgtacacaacaacgaaaagattgctgttgatagtaaac  
gatagttctgtgtttgaggaccacatttccgggaaacatagttactatttctgatgtttgtagtgaagctcctttatggactcaggaaagctgc  
tggattcagtcactatattttttcttcttggttttgagaggagttgagacggaagattgcttacgcttctctgctacacaaaagaccctt  
ttcgagatcaacattgtaaacatcagcatggctgtatgcaggaggatcgttgaaccaaatttttagctcctttccgacatcctaaaaataaataa  
agaaaaattcaataaataatagcaaaaagagcgtcacataaaaagctgctgatccgtattcgatataaaaatttcgaaacgcaaaactcaaca  
gaaatagcagccaaaactaaagcagctctacctggctcattccaacattcacaatgaaagtcaaaatcagcccaattggcaggaattgaagaa  
ataaaaagttggctcagcaagaatttcgcatctctacgcaacatttctcctcaggatagcgtgggtctgttgcgctatctctataatgacat  
atagcataaatcgttgaatatacgtttgagtcacagtgaaacagtaacaagtttcgctaactcgcgtttgttacctctgtaacaaagcagat  
cccatttctatgaactttgaacgacttttactttgaaagtgaattactaatttctcgttgcgcacagaagaagtaacaaacaaaacacggaaa  
ctgcagacacattagctaaactgctttcattagacaactgagtaacagactacaacaaaaagcagctttcacgggttcttcaggatcaaagaaa  
cctataaattacttcttgaactgaaggaactgtccacggccatacctaggcaaaaacaccagttccatccgaccaccgagtttaagtgaat  
gtctgaggatttagcctgtttgtactatggttagagacaatattggaatccgggggtgctgtaggctcctcctttttgttcttttttaagtattact  
ttctattcatttctattatagtaatctttatgcaacaatagcgaatccaataggaagggtaccggttgacctttcaaatgtaattttgctacc  
gatttgtttgtgtaactttgatggttatataacgcttacagccaagtagcgtatatacagcaaggcactgtaccgtatatacaataacattt  
gtttcaccacaaaagcagtcacaaacattgggtaagaagattcaactggcagcacaacactgtccatagccagagtcagcaagaatggca  
ctgaaggagatcaagttgttggccgcaaggtccaactgaacaggaacctgtaccaagctgttccgcatgctgtttgttcccctaataatct  
gttgcaagctcccgttactggtacttctaaagatgatcaacaaggctcaagaaggccactgggtgaattgttgcattaacaaatccacagcct  
aagccccttaacccaaggttttccggtatctggatccgttacgactctcgtcgggtactcacaacatgtacaaggagttccgacaccaccct  
gtcggcgtctgtagggatgtaccaagacatggctgctcaccgtgctcgtttccgagcatccgtatcctcaaggtgtcactgttgagaaca  
aggaggatgtccgagcagctacgttaagcaacttctgatcctaagttgaagttccctcctcaccgtcgtactggtactctcggctggctggc  
aagaaggttttctcctcaccgtcccaccatttctactaaggttatggtctgtcgtcgtagtaaaaaatttcttctcattccttctgtctata  
gcaattgtggcatcgtagattcgtagattcattatggtagaaaacaagattgttgaatgaagttatgcaatagtaggtctgtaaaattggaagaa  
caaaaaaaaaaacgtagtttagctactagagtcgatgatcaaaaaaaaaacacatggagagtttagacatagcagcaacaactgaaaaga  
aaaacaaataaaagtgaacatttattatacaaaaagaaataaagtcatatctcatcgctatcatatccaacaaccagtgctggactcttt  
gttgcgagggctgggatactctgcaagatcgttcaaacgtcaggatcaaggaattgttggacgaagtggaactttgctcacttctgatcagcat  
tctcctgggaagcctcttctgttggttatgctgagtggtatgctcaattgattttgatttcggatggaagaagatccgtcagcataaagtaaatca  
tcagaaggatcataaccctcaagttcaaatctagctcaatttccgctttttgatttcttttccggtcttctgattcctgcaaatcctctaaaact  
ccttgggtaataaacttctcacgacgtcggctgctcgttcttcaaacgtctttagtttctgcttctgtagctgggttaggatctaattgttcccatc  
acaattaagacactcgtcattgtcaagagattgatgggcatgcttcttagcgaattgggcatggttattacatatgtgacgaaagcagatt  
cctcgagaattcaaaactcgtatgctcgtatgctcccccattcggcaaatgcccggccacaaccttcaatcgtctgttgggtgaatgccac



caatgtaaagagtgtgattttggcgtaaaaaagaaccaacaccacccatgtcatctcgatagtcggcatgcttttcttccaaaacaatctacgtt  
agcattgaagaaatcagtttcattgggcaaacgatgcaaatattcacatttagatctatacgcagttagtttgtttcagtcaccatcaattatgtt  
tccgacatgaaatcgcacctaccctccgaacacattcctctggcaaaataagacaaaaataagaccaggaaatgttccgctttgtgtatc  
cagaatctgtcattgttacatctgtgtcggattcacttggctttcaagggtcttcacgatttccaccactccattattataccaactaaaga  
tagtcagtaattatcctatccagcatttcatccatcaagtcaattacattatacacttgacctgttgagggtctccattcaaattctggctc  
tcttcaattgtttacgcgccggtcgtttctacgcttcacgattttttcacttttttaagattttaccagattcctctattgtttcagtaattcttctt  
aacacatcattttgttcgtttcttgcgcattatttccatgcttctcctacttccgcatattcgattttgtgtagagaactggaacatccagctt  
gtcttaacaccttaccctcacttgggtgttgagcttttgcggtatggggcggtaaacgcttaataaaaataagccaaacgaacagcaagtatt  
taacgcagcggagcataacggtaaacaaaatcaagcatcgcattcagcggagtagtctgtctcctttgtttatacaccgaaaacgcacaagtgg  
aattttgatccacttttgattgtttctttctgttttggattgaaagattgaaacctttgtttttttttcagataaattccatttctcgcacatc  
cttctatagcagctgatcttttcttctgtaagagttctcattgacaatatatactagatttctataaaaaaggatttctgtttctgtggttaa  
ccgttgcgtttcaaaaaactagaaaaaaactgatactaagcgtctgtgatgtttattcaagattcgtaaagcgcactaggatttcgaaatgctt  
gcaggacaaaatttcaacgttgtttctcgcgtttagcagtaagaattcaagggagtgctggcaataacgtatacagagatatcaagag  
aaactaaatcaaaaggtaaacacaaaatacgcagtggaaaaactgttcaaaatgcacgcaaaaagttccgctcctaaagaagcaatttctg  
aattcaagagtttagcaaaaaatcatccgagaaaccgaggtgaagaaggtgaaaaatcccgaattaagcagcttattgacattggcaa  
atttcaagaccttccagcatcggcgattgaaaagctatggcgagctagaaacctcaggagaaacattttgagtggtgcgttgaaggtccacat  
atgaaaggatgatttctcgtgcaagaatatccacttttgcgttctcctactagagaaaatcaaggcatggaacccatttaatacaatggg  
gcttcccggaaaataactgcccactgataatcactactgttgaatataaactcaaaaaatgcttatgctaccccacatactgtctcattcca  
ctttgcagatctgcttgatgcaatggcattgcttctatgcgatgcaatttgaacatgacaagctttaaagttcttctgacgtacagctatttgc  
tacggttcaaaagttctataatgcctcgcagatagcgttttagcaaggaacggctctcgttgcgttgaaaaacttcgaagtggaaggatttaa  
tctttcaaaagtggtggcatatggacatgcttgaataactgaaatgagatatgttacgaattgtacattgaacgataaaataattgtttatgcc  
ttctccttacaagataccccatgttcattgaattcaagcttactagtaactagtgactaggaactagaaataagggaacaaccaagccaaaa  
cgaaagaataaaaatccattgaaagatgaacatttacttcacagctacataaaaatcctcaaaagctgtcgtatgctatcgtattcgtcttcg  
acataatctcgtagacggattcatcaacggctcctctttagaattcgtgttccagtaggtttggcagcttttttagcagcattcgtataggagc  
aggagcaggagcgggagtaacggtagcaccgcttgcattgagcctttctgttgcctttttagtgacaattctattgacagacttctgaata  
gacttgacattagcagcagttaaactagtaagcaatagaggaattaactctgaacaaagtcattgtattcagaggaagttgagaggtttaatt  
ttgcaaggatttcagcctgaaaggcggcatagctcgttggttctcagctcgcgttgttgcagcttctagcacggttaccactggcggattt  
tgatcaacaatgtcaaaaaggtccatagcattggctaagctgagtcatttccgcttggcgcaactgttcttggaggcactagcagattttgagg  
cttctcactggccttgatagcttttcaatgttgcgttcttggatacgttgtttcatacgcagatgatttttagtgagctttggttcgctagaatcgggaga  
cgtattttggttgtttgtattgttgggttcttcttctcgtcttctcatcatcgaatctttttgggctttgagtagtcccaatggaa  
gttcaactcagtagccttactaggctcctcaacaaaaaatcctctattttaagatcagttttgactttctacatttctacatacccacatccat  
agtacaacgtatcttttaagcttaaggactgcaattttgggtgtaagggaagaaaaactttgtcacaattataaaaacaactttgcgaa  
gaagtaaagcttatgtatgagttataatcgttttcttttctcaaaaatcaaaaacaaaaggaaaaataaataatgaatagaagaaa  
gaaaatgaaagaaccaaagaaggattcgttcaaaaagatgaaagattctgtattgtcggacttgtaaccttcaagaagatattttgacata  
ttacaacttaaaactgcaatttctatctgctattgtttcatttctcctctcacttaataatattcgtttgtgtacatcatattaacctctcaata  
aaatattgaaaaataaccaagcagagaaaagaggaactaaaagactgtaaccttagtcatgttaatacaaaagtaaattttttattcgtttca  
aaaaacgtagaagcctgtagaagttagggttggcagtgacatgcagacttaaggcaatcagcttctatgatattatcgtcttttagttatacca  
aaaacatggcattcaactgttttcttcaaaaaagttatgaaaacaatcaagaataagtgactatgtgattacatagcaattttgctttac  
aggttttgattgagagggagacaaaacaagacactcaataaataatcaaaaacaggaatagatcgaacttcaatttgctatttaattcattat  
aggattctagcaaggaatttcttcaaatattatgctgaatcatttcaagctgtttcataatactatttgaagcatttcatagccagattgttg  
atcttaacgaaaacagcagtggaaaaaagaggacgatggaatagtttctgtttcgaagaagctgaatgattgattcattattttagcggattt  
atatgtttattagtgatcagattgtcgttacgctactcaacttagatactttattgaaactctgtaaagctgacatcaccgctttgttctcctcaagg  
aaagatctaagtgacaaccttctattggaaattgaaacgtaaccagagcaaaaacagtaaaaggtcttaccaaaggacgcaaaaataaagaag  
tactcatagaaataatagaatggatggatattttaacatattattctgggatgaaattaacataccgctgagtagggatcttcagatggat  
tctgaagatatcctgttcggcaaacgttttagctacacgcaatctacagatgaacaaatcgccgaatttctgtgaggcattttcttgtttgatcgg  
gatcaggacggaaatattacctgaacgagttgggtgtcgtaatcgggtcttgggagctcctacagcagctgaattacaggatattgattaat  
gaagtagatgctgacggaaacggaaccattgattttacagaattttgacaatgatggctgtaaaatgaaggataccgataatgaggaggaag  
tccgtgaggctttcaagatttcgacaaggacggcaatgggtatatcacagttgaagagcttactcatgtattgaccagcttgggtgagcgtctc

tcaagacgaagtactgatatgattcgtgaagccgatacggatggtgatggtgcattaactatgaagaattctctcgagtaatatcttcaagta  
attatcctcactttctttaaaccattcacaccgtgatcaaaaatattcaatcaacatctgtgccttcataatTTTTTTTcaatcagagtaaact  
ttaacatcgcatattccaatTTTCTaaacttccgttactattatcatgttcttcttacagcttatggaaaactcttcttttcatTTatgagaa  
agaaatggattcaaaaagttgatTTCCcttactgtaactcttaggaatgatttttgtaatgaataaagcatttttctgtcagtcagttatgtga  
aggTgaaaaagatgattTggaagcttaccaaacaacttcaattctccttgcctcattaaactaattcctcactactgatcttttctttcaaaaa  
acaaggctcataggtggtcgtttgcaaacaaggttgattgtctctttgtaacgactttgtccaaatgactgtcaacaggtttcatcacagct  
aaggaatcttatcgtttttgtatttttaaagatagaactataaggttgcacttcaaaaaaaaaaccttcaattctttgtttctcgatgttacgtag  
ctcggctttacggcctttatattacgtccgtgatcacaaccatggatagcagaattacaagaatcctacagatacttTaaaccttactgttgatgtg  
cttctctgtatagaatgctttcattaacaagcgtaaactacaatcattgcatacttatgacacaacaataagatgagatttcatatactttgtgca  
tttaaattatgtgaattcatattttcattttgtgtatcctgtcggatattcattcctagcagaagaattgcaaattcacattaaacttctcatgtcctcct  
agccagtaattTgcacgaacaagtccttggaaaatctattgaatgcaaaactataattcatcgaatacaagctcatgaaattcacttcttttca  
gtcctctggaaagctcacacttatccttgttctaccatcttccaagaaccgcttattacagccgaaaccaaacttttagaaattagaaagaga  
acctccaatTTTTtagatcatatcaactTgaagttactttgtataaaagatactggagcattttagaaatcagcttcataatatccaccaaggcattt  
ctcatagaagtttcaaggcgcgtccgctattaactagatgtcgaacgaacaagaggaagttttgattctgaacaatttagaaaagatacattc  
attcatgcagattctctcgaagtttgccttcaacaacttctatagatcaattgaaatctgttcgaggtaatttactgaaacaattaaagcaatc  
acaggataatttaggttctctaagaaatggatgaagaatccaataaaaaacttgatcgttcagaaaaatgaattcaatccgctgctggagaag  
tcgttgggaagcttcgatattcactcgcagcgtgaagatactcagttatcaattgtgcaactacctcagaaatcaagagcttagatcttgccaa  
aagaatctcacatcatcgatgactttgtaaaactgtcagatgctgtgacagcttacgaaaagctgcggaatctcagacaaaataggcaaa  
tcggagaagctacttcttaatgctggctactttgagttgtacaatattttaaagaattcagaagcgtggagaggatgcttctgtgagccaaaa  
catcacagaattcaacgatctttatgaacaagtgtttgaaaatttcagttacaatttaaagaaggctttagcatacaggggggatttaagtct  
gcttcatagaaaactctacacgaactctgcggtcattgatgtaacggccgaattgttcaaagcattgaaaaattggattgcatcaccagt  
tggatgggatttcaaagtgttcgtgaaaatgaagaagctggtttattagaaaatttcaagaagatataactggTTTTTaaactgctcagact  
tatgacgatcaacagttcaaatttcccgcctcattggagaatggatttccagctttgtatgttttTcaatgaaacgaaaagcagatttatctaa  
aatcttgaaagaaaaagaaatatctatgaagtttttacttccattcgcatacgttgattttcaaaacgcgctaaaaaagcagtttctcgg  
ctttTaaaagagggtgaattgaacgatcaaaaattaaactcatactactcaaatgtttgagctctttcaaacgaattcaatccttattacaaag  
catatacaaccacgaggctaaacaattggacactctcttaattctttcattcgaaaaccgaaattcatccgaagaaaccaatcaaattctttc  
gtcttccatgcaactTTTTcaactttatcggaagattatggggcattttcttcaatttactagaggaccacctttaggattaaaggatttttagt  
gattggttacggaaatagctgaaatagaactcctcgcgactgtcatcttctttTaaacaatgcaattcgtttgaatactgctgagtatatt  
catcgaacaacattTggaactTgaaaagcagttcaagaatatgccatgctgacttagcggagaaatgccttccagaaggttaattgactttat  
gttatattcaaaaagcttTgaatcaagtcacgaaaaagtaagaattcggTtaagacaagtttagagccttTcgaaaattggatcttag  
aaacctggatagtgTgggtgaccagagtgcttatgtattactgctatacacgaaatgaaattgaatgccgatgaattcctgggaacaattgaaca  
gaatacactggcgcgaattttgtgatcgggtttgtgaatcattaccaacaattTTTTtattatataatagattaaacctgtgtctgagattgg  
cgcagaacaaatattgctcgatttatgttattcaagaatttctgctgaaaatgccagtagcaagccagattatcagattacagatagctatatt  
aacatctaacgattttatgggatacatagaaactgctcaaaactttgctgactccttcccttcaaaagaaggattatcaaagttacTTTT  
tttgatcaaagatcgtcgggtgcaactttaccatagtgtagattTgaaaggagctctaagagtgagcaatctgactatctcaattatctctc  
tttctgcgcaaaaagaacgatcttccgacagttctctattTTTTgtattTaaagccatcaacgtacacggatagaaacgcggtctcgttatc  
acttgagTtaactcctgatgcaagcagtcgtacttgcagaatctTggacgattgtttacttcaagaaaaagtatggctaaatttcttTgctgtctt  
ctgtctctTTTTctatagtttaggtctttatgttttatgtattgtttgatgagaagccatttacagattcatcgatagttattacagatgctcttt  
cttttagacggtccatgcatgattttcattatcctaacagatattttcctcTgccaagtaaatgaggacaaaaattgcaaaaagatcgggct  
gttctgggaatcgaaccaggaccaccatcacctaagatggtatcataccactagaccaaaccggcctgtgttataataaattgtttTaaataac  
ttattagtagtaaatgcaattgTTTTgaaggttatgaaattgtatcgtcgaatgtcaaaattgaaaagtagtcttTgaaattagatagtaagg  
ttcagcttataacatacgtgcagcatctatataacgaaaaatagcaggtcgaaggagagcttctgactttacttacaacacaaactcaat  
tgtcctattTaatagctaaaggTgaaaaaacaaaaagaatccatcatattgtttgtgacaaggttcaattTgaaagaaagcaagaatgggaa  
agatgactatcTaaatggttcatacagccaatatcaatagcctTggagactccagaagaatttttagaatattttttTaaacatagaaatgTc  
taatgtgaaggtaaagTaaattacatgtcagcggaaaggtatacaaggtaaaagaagatgagTgaaaccaaaccagccttattTgccaaga  
acaaaacaatgcagaactTgataatagcttctTTTTTaaaaaacatgaagacacaaattataggtattTcaaagacagagcaatgtgacaag  
gTaaagctatcaaaatttctTcgaagacaaagaatcgcagccagcgaagaggtaaaagttgtgtagTtaaaaaaattacggcaaaaag  
ttTccagTcaaggtttcgtgtgagcgaagagaaagaaaggaaaggggcaaatggaaaagccaataatcaaaatgcagaattaggtat

aatatttaaatttctgctgcatgtaataaacgaagtataaaaaataatgccccatgattaatagcagcaccagcgggagcagaagaag  
acgaggaagcgggttctgggaggacagagcaatgggacgatttgcctctgcttcatacgggtcaaagcaatacctaaccctcaaaaaacagc  
caaaatacaagcacatccaatagcaccattacgggtggctctccaaccctcgaatagctaaagcaccaccagtgagaagccggcgataat  
ggcattgtaaggatcttctctacgaaactctttacggcacagtcgaatgtactgaacaaaccaccccaaacaccaaagtaccaccaacac  
tggtgctctagtttagcagctgtaatagcagaaatgcgctttctctcctataaaacaaaatgcattagcctcgaacgaacaaacatttctatgca  
tgatgcatctgtcaccatgcaaccaatgttaaaaaacacgtggcaattcataccgtggactatttctccacccttaataagagtccaaattgc  
accaccaattgtacccatcgaaaaggcagaccaaagtctttagaacaacataaggacagggatctctagtatgatcagcgtcgcattttgc  
aattttgtctcaattccaaggaagctttttaaaaggaaaacaggtctacaacacacaaaaaacgacgcctacaacagaatgcgaaag  
cggattcgtctcagacctttctgtgctgtaaggacaggtccaaatcggaacggtttgtccttttagataatgagacatagcgtcaacgttg  
gctatatataatcgacctgctccgctacagtagtgtaacaatagagaaaggtaaatggaaagcacaggtatatgtatagtttataggaattt  
ggactacaaacgatagatgggaatggtagatggaaattcaggagagaaagaggtcagagagtgaagatatgaaatgaaaacattgatttcta  
gtgtacagttcttctctttttatagagtagaatgaaatgacttcaacaagggtgcagaaggaaaagcaaaaaataatggaagcaaagaata  
ttgtgaatgagaagctcgatcaaacacagattttgagtaacaggataagttcaaaaagtgaaatcaaaaagaaaacctaaatgcaggag  
aaaacaaggagcagatcttctgtgagtcgaatgtatagaagaattagggattgacaaattctagagaagaggggagagatggatccagctttct  
cttctcaaaaattccgggtgtaaagcttagagaaatggcagattccaggatcacagagtaatgtgacaattcgatgaccaggaccaagttgctt  
ggcaagacgaaactgcagcaacgcaattaatagcggagaactaccaacaaagaagccatcattgacaatcaaatatcgagacatagccacag  
cctgttctgtgactctatacgcataatcaatgtgaggcctagctatagaaaatgtagctatcggtttataccacacccctcaacaatagt  
gtcagctgtatgtcagcagcaggttcttcccgttctgtaagcaacataacgcatggaggactttgtgatagagaccattctcggagggtct  
gccaggcagattttataagaaggttttcggatttaagatactttgcaatacctccatggttctccagttccggaaccagctacaaatgcatctaa  
cttctccacactgacgcaaatctgggcggtagttttatagtgcttgccttccaaatgtaggggtttcaactggttggaaaagtatccttgctc  
tggaatagattgtcctttgtatgtcgaagagcatggtcttgagcagagttcacgaaatgattacgatcaacgatgggagcaggggacacagct  
gaacatgggtcccagcaactccaagacatcactttttcttggtgatcgctcggcataaagatatgacattataaccaagagaacaacata  
gcatagcaagagaaaatcccagtagatctcggtccctatagacaacgctggtttggtgagggcagagctgaccctgtctgggacatttggga  
tcattcaagggaacacgatccttgggagagtttccaggatataaaaaactcggtccttggtcaatatttcacagccagttgcttcagacaacgactt  
gatttaacgagcttggatattccaataagaccttccacaccctcaacaatttctctcaagtcctcttcttggttgggttctgctgaccta  
tccatttctgcaaaatatagacagcagcagcgggaataacgcggcaaaaatgtctgtatgctgtttgacatgagaatagcgtgaatttca  
gtgaaatcaaaaagaaataaataaaaaaattatcgcaaagatgttgctcaatactctatcaaaaaccaggaagacttgtccaaaagtac  
caaaaatccaagtagtagagtagacttcaacgacgctttcaacaacaaacgaaaataaaaatagagaaacgtttgatctcgtaatacca  
agaatgtacctgaaaatcgacgatggttcgtaatttgttataatgtaattggtgtacacataatctccaaggaagtaggtgacagtcagcaa  
tctcaaaaaggcaccagaagaacggatcaaaactggagcttttctagatttctcgagttcttctgcttttctctcagatgcaatcaaaa  
acctgtagctctttctacggcattttattatcgagaatatcatacaaggcgtctcactggatggcaagagtaaaaaagatgcatggtggtg  
aaagagaaagaacaaaaagagccggaaaggcaaaaggagtagtagctgacctggtactgtattgattaatcaataaacaacata  
attcctttgatcagccgggagtcgaaccggagcgaatgcttggaaaggatccatgtaaccgctacaccactgatccacgttagtagttatggt  
aaagaaaagcatataacaataaataatctagaagagattgcaatcttggaaatgggttgagcatctatcttcaatgtagtgctcgtt  
ctcagcaatttttttctttaaattgagctgacttggatccctttatgatttttttgtttattttagtagcgaagcttaaacttatttcagagt  
ttaagcatcaaaagttgaagttagtcattcggaggccaggtttctttagatattctgtaacgaggtttcttctactccttgaattcatggttct  
gtagaacaacgttaccctactcggatgaaacaaaatataatagataaataagtaataattgagtaattataaaaagtcaaaagaattga  
aaaaaagttgctcatgaaagagaaaagtcgaaataccatctcgacgagggacgaggaatggttcggacgaattcattcgtatcgggtagtc  
ccaggctcggacttagaacattgcggatcgtttagatcaaatgtcagagcctcatctcgtcggctcgttagaaaccggttgcccaattgctta  
ccaaggctaaatcggtagcgaacgtcttggagagcagcttctgtcttaaaatcagtttttttaatttctattttggttcattccttcatgctg  
attgttttcttcttcttcttttcttcttcttactacgacatccctttgctttattacataggaatacaggaacgaattataaaaatgaga  
actctctataaaaaatatttggtacaatattgattgttggttaactagggtggtccgtaattacaatagcagaaacggttggcattcagga  
tcattgctcatcagatcatgccaatggatcgacattgacgaatattcgaaggagccttgatataatagcggctgagcggactgttgc  
acttaccatctgacattcattaggttaacatcttctcttctcaaaactcttcttataagaataattgtaaagatgagttcttctattcagtaag  
gattttttatttttattttctagcttggatgtgcttactaacggaatcgtttttatagacctatcaagcaaacgctctatggtcgttttgg  
cgctctggagacttggtaaaaagaagacggtagttctctgattttctagttgaaacacgctcataagggttttgaagctcgaatctataa  
atgccagttcagtaaaactatgctgtgcttgcgagtcacgttccatgtattcagttgtgctggtttcaactcaagctgcttcttgaacac  
gagttgcatgaattcagctctgcttgcacaaaaaacttgcgttctttttattagttgtaactatgtggaatagttccctgctcttctcttctg

ataaagatggccgtctccccaggatttggtaatcgtgggttatgcgcgctctaaaattgaacctaagacttcatcgaacgtatcacccaatacat  
caagattgacgataatgactcggaaaccaagcaaaagctcgaagaattcaagaaaatgtgcacttactaccgtggctcttatgatgaagtgaat  
ctttcaaggtctaaataagcatctcttagaacgaggggtgaccgtactgagcgaaccggtttctatcttctctcccgcgtctttgtac  
ccgtcgtaccatttgaagcaacaatgctatctgaaaaggagctgcccgtctcattatcgaagccctttggattcgacctgactctgctc  
tgagcttcaatccaagttgggtcctctttccatgagaacgaggttaccgtatcgatcactctgggcaaagagatggtacaaaatctcgttcat  
ctccgtttctgtaaccctatctctcaattatggaacaaggattctattccaacgtccaaatcactttcaaagagcccatcggcacagaaggccg  
tggtggttactttgactctagcaccatcgctcgtgacatcgttcaaaatcaccttgttcaagtttcttcttctgattgctatggaacccctacaactctt  
tctgctgatgacctgctgatgccaaggttcaagctttacgacctaccgcttgggaactacaagatgctgctcttgccaatatattaagagca  
aggatggcaagcatccaggttacttggatgacgaaacagtacctaagggtagtaagtgtccaacttattccgcattccatgttgtgacaatg  
atcgttgggatggtgtacccttctcttgaaggccggtaaagccatgaacgctggaaggttgaagtaagcttcaagcttgaagcttggcaatgg  
ctgttcaacgatcctatcataacgaattggtcattcgaatccaacctaacgagggcgtttatctcaagatgaacatcaagcagcccgggtattg  
tccaagccttactcaccgacttggattgacttacaagaaccgctttaccaacatgaagttgcacgaggcttatgaagccttgttcttgcacgctt  
tgctggtgaccaatccgcttctcgtcgcacgatgaactcgaatgtgctggacttggtaggcctctttgcaatatatggagaaggagaagcct  
gagccaagccttacgagatggttctgaaggaccagactgttgaatgaattcttcaaaagttggttactacatgataccctgattactatg  
aataacctgtgacaaattgctgaagacaagtaaagagcttctcattctttaaagagagattttttattcccttttaactgtacctagt  
tttattattggacaacatttaactccgttttggctatgtattggtcattttagatgtttagatgctcttgcacccaagccggttgagtg  
atttagaactatttagaagggttgttctgtttgttcttctgtgttattgacaatttacttccaggctaaagtaactttagtctatgctttcaata  
aactgcttttaatagaaaaacgaatttattcaaaatcataacaagttggaactcgtagatagttctttaggactggagttgtaggaagaacaga  
attgtattcgcagtactacaaatataatcataaacatgtcgtaccaagatcacctccgaatttgaagcactttaccaatgagttgaaacc  
gacttctcgtacagagaatcaaggcttatgagccgcaaaagctgatccttggcttggggtaacggttgtttcacaacgaattgtaattc  
cttaatcaattgttggcgtaacctcgaccacgatgagcaggatgtacagaaggagtggtggcaacgcttcttccctcgttcatgcttggac  
attgaatcaactgtaacacttctgaagatgttctgtagccattaagtgcctattaacgtgtagtatgttccgtgggagcaaaaaggccaagct  
ggagctcaggtgcttgtgaaaccctgaagcagatcgttgaanaatgtagtattgaataccatccggaataaccaggaagaaagaaatcact  
tttcaagaaatgtatggtcctttatgcccacaacagacaatagttgttctggcgtttccttattctggtgaggtatgaaaatgcctccatagc  
aagataaatcacattctcttattctttaaanaagttgagtgattcacattctcttcttctgctgcttgcacataaccgtttaaagagacgcac  
gctcatttcaggaaaacacatgctcttaaatgagctacctgtttgttccggattttcaatatttcaatgtttaccatcttttaataatgaggt  
caagtgtatgaaaaactcaaaaaatcctctatttgaacgctctggaagaagatattctcgttatatgacacatgcgtaatacatcgtcactc  
acatcccatacaaaaagttcactaaaaaatgaattctgaaaatagtttagtcatagttggatgaatttgaaggtcgtgaaagatttgcac  
tgtccttcttatttgaaaagtttgattacagtagtgtttatgtattgcatcaaaataactaataattgaaacaactgttcttctgcttttta  
agcattaatgtagttgtaattggttgaatccttcaagcactgctgtttatgattttccttgataccaaccactccctgctattcaactcttctg  
ctgtttaaacccttttcttcttcttcttcttcttcttcttcttcttcttcttcttcttcttcttcttcttcttcttcttcttcttcttctt  
cggctcctgcttctcgcgagatcatgtcttcaaacgtttaaataaggaatcaagcttgttacttttataacattaagcaagaaactaggcgaatt  
gttaattagctatcggcagttattcattgtcaaaaaacatctattcatttatacaaaaccgaaaagattttatcctcattataataaattccctt  
aaactcatctattaaggccaagcaaaaagtcataaccgatccaaatccttctgcttcttcttcttcttcttcttcttcttcttcttcttctt  
tttttctgtatataagaattgcaagataacatccttggccagcaaatattctgaatcaaagttattaagcgttaaatatttatttcttctgcat  
cttccatttcttcatccaaaggtccagaacaccacaagaaatcttctctgtaataactccatataagagtcacagaagcaactgagtttga  
tgacttgtaccggctcaggtgtgactgaactctagtttctgcttgaagatgcaccaagtaaccttctaatacgcagaagatttggctacgg  
aaaccaccaaccacaatgttctgcttttcatagggaaataaggagcaaacacagtgatgtccacttcttcttcttcttcttcttcttcttct  
tgtattaataacaacttaggagatttgcagtagtcttctgcttgaactcaaaattgatgtcaatgtctggatatttataataaactctgc  
acattggcaagatgaacattatccatttgcagtaatttcatgcttcatcctgcaattatatacgaatacctgcaactccttctcatt  
gcagcgttataatgcatcatcaagtagggaatctgttcaaggactgtcacgatccatacagcttctgtcaccatttctgacatttccatg  
ggtcgtatgcaagcggtagatggccgtccgaagagagggtatcaacacatgactgagcagattcagaactttaccgagtaacgaactttggtc  
taacgctagttcagccgtaattcaagcgcgagtaatgggagcgtacagaataaacgattttagataggatcctcataatccggactgctta  
agcgaacaggcagctgtgaatgaatacgggctaataacatcttacttcttcttcttcttcttcttcttcttcttcttcttcttcttcttct  
taaaaaacttctcttagtacgctcgtttaaactgagagcaaatgttgcagtagtaacatagtaattccgtaaaacgatgctatcattgcaaaa  
ttgaggggtacacaactgtatcttcttcttcaacagtaatcagacgggcttatttagatcattcattgtagtttctactagatctgataggaattc  
cgaacagactcatgggttatgtcctgaagaccgtaatacgtgggatttgaaccaatcgtctgtacatataagtcattgtaaccaatccacagc  
atcctgttgtttctgacagttgtgttgagatctccgaacaanaagcatcatgaagccacactgttaaatggcttccatgggtaaggttcat

agaatctcttgaatagtccttttagtattcaccgttagtaaacagcctggctgataacgttcgttctcatattagccgtgaaacctagcatttgca  
gtaaatcactaatgggataatcaatgtatcgtatcctttccatcatattgctgagttcccattacaaccaccacattggattgacattcaacgaa  
tagataacatcatcgtagcaatcaaaacttttattaatccatgtaaaaacatggcttcaacgatgctttgtcatgtgcagatgtaattcagaga  
caaaagctattccatgttgaagagactgacgcaaaactaacgtcctggacctttcgattgccctgtttctgctacagagaactgatattcatctca  
tcagccaaactgaatgtgacaatgtcaagtgaagttgcttgcactttccgatcaggagtgaatacaagactagattttcttgagatatacttt  
gcacaagaacacgatatacgggcttagacatagccaaacataagggaaggaaaatggtaatgctaaacgattgcaaatgtatcgtaaatgggtt  
aggctatccttgggactaaagtgaatataatggaggactagctcctaaccttcgccaaggctcagcattagctaaaggaaacagaaaggcc  
aacaattcttatatgtttttctaattgcaaagacatgtaacggatccttgaagcacaacttcataaaggaccatgggaccaccaataattg  
aagattgtcacatatacatgtcaacctgtgtatactacgattgttccatctttcgataatgaatcccattgagaaggagtagcaaatataa  
ggcagccacttgataagcttcaaatcttcagatcggctgcccggtaacttaataacacctttccttcaccaatattaccaagcctttcttccact  
cttcaacttttgatcgataatcttctgtattggagcgagataaacgactaccagatcaggattttccagtggttcaacaatgaagctcagc  
acatactgttttccactaccattaggagaccaataaataaggatcattgtttatataaggcactaaagacctgcgtttgtaattgttaaat  
ggctaaatgagaactgtacaatgaaatatactccggattccccaggtaactaacaggtacattttgcatcaagaagaggagtcggtgcccga  
aattttcaggcatgattagccgtttaaatagcaatgggacctgaagtgaatgaaccaccgatcagagataaactgatgaaataattagga  
ggcagaggctctgttaaagtcacagtaaaattgacaatgtgttcatcttctgatattttctaagtaaaaagaattgttcgtaatgtagaagctttc  
accattgacatcttcaaccgatccagaaagcttcagaattgccactaaagaatcatccaagtgaactgggaggatatacacaattcaacc  
caagtaacgatcagtaataggctggatagcttgcattgtaactctggggaatgactgcacatattataaacgcgtcgcaccttcttgggaa  
accaattaattcacctaattcagcagggtccaaatcaaaatccgataccaagagaaatctttcttctactcggcgaattacttccgagggc  
aatttgcacaactgtctcagaggactcatggtcggccaaaggcgttttcaatcatttgaggtgtctaaagccatcttgcacagctgacctcc  
acgacgtaaggctatttcaaaaattgcctcataattcttctgcagactgggttacataaacatgtctactactaaagcaaacccatcaagctg  
ctgctcgaatatatgattgcaataacgcattaatcttgcgagcaatcatcaaggccctcacgtataggaatcggtacacgttctaaaagtctt  
gcaagttcaacttttcttctccgtaccggaatatacttaattctgtctgataaactaaagactctgaacagttctattaagatatagactgggt  
aagtaacctgttatacgtagccattgagttatgagacacataatagctggctgcaactttaccaagttcagttccggttaatgtaccactctttgc  
tataacaagaagctgcattttcaagaagtaaagcagcagagtgaactaaatcagctctttttgtataagatactgtcattttcatattctgga  
cctacactgtataaacaggagacctcagcattctaacgtataggtaaagtaaaaccaaccattcaacacatcctcaatgcttctactgagccc  
atagctatctcagcatttaagcaatcagtaagcgggtcataagttgtgattcaattggcaattgttgattcattaaagatagataaactgtaatt  
cagagtgtcgggtgatgataaacctcaccatagtggtcaaacgtggccgaccagctctaccaagcattgagaatcttgggggtgaaagtt  
cagttcaaaatcctttctcaggtgagatattgagtagctttgataattacagtagagcaggtaaattgacacccaagcgaagtagcagtag  
ttactaaaacctgaattgtacctcagcaaacagatcttctcggctcggcgatcctcacgtcgatacctgcatgatgatagcaaatccataagg  
aagaagatcttcaaatgctcattcttgggtgatcagcttctgttgcaaaatttcacgcaagcagcatcggaaagcgaataatgacctattgtt  
cttcttcaaaagcttctcgaataaaacgagcagttttataagtttcttcttagaatgcacaaatataagaacctgattttgcccagctgtgca  
ttgtcttctataacaagcttcattagtaactgtaaacgttgataggtttctttcagttactccgataaattctgttttaaggcgaagggcgata  
tgttgcatacaaaatagaacagacccttattaggattactcgcagaaaagttgagacatccttataattaggcaacgtagctgaaagaccaacta  
aacgaatcctttcaaaagactcttctgatgacgaagagtagtgcacaatcagttccaagactggctcctttcatcatgcagtaagtgaactc  
atcaataactaagcggacaagattgacatacagatagctgttgattttctggttaataatgtcccatttctcaggtgtgtgacaataattgtg  
ttctgtaattctgttcttagttaactggctatcacctgtcagctcagagactgaattccgtatgggttagacgctttgaaaattattgaccattt  
cctggaccaacgctttcaacggcgaatatacaatcttgaatcattttgcgaaatgttaaagttcagcattaagggtcctttgtaattcgttta  
aaatacataacattgccacattagttttaccagcaccggtaggagcacatagtaaaatattctcgtctgtcccataagctattgggaataagtgac  
tctggattcggttcaatgaaggcgtattagggaagctcctgctgcccactcaggaagttcattcacagacactaatcgttcatctgagctcatcgt  
agccttagttggagcaggaacatgaattcttataccctttaccagtgctcggaaatgagccctcaggtagctttactgctttattgacatgagat  
gagcacctcagagaagacatagtttccaagttactgttcttaggaatcacgttattgttatttttagcactaggctttgggaccacatcc  
tcagcaggtacaaccccttgccatctaggacgggttctgcttctgaggggtgacttcagcaggaataggagcattatgttcaaaagcttgaat  
atccaggactggccagccttctgatagcttccactatggtagaacgctccttatcatcagcagctcgcgtaagtcagtgagcaaaaactatcatc  
catcggtttttagtcaaaagttgacaaagaaaaatgctcataatcaaaaatattcattagctcgttctcaagctcaccaagatcaacattcgatg  
aaagagcatgcaatgcaagattgttttctggcatacatgagcgttctggtatgtttgcaatttccggtgaaagccagaatgacatctatgtct  
cttgggtgaagttcgcacttccgatacttttttagtatcgtcgaataatggctacctcagatcctgcttctgtgggaatttcttaccctta  
catcctcggtaggggcttcttcttcttcttcttcttcttccatcgttccaggttcttcttctcctcatctgcttcaaaactggaacgctg  
aatcatacaaatcctttcatccatggctgtcttcttcttctggtatagttctgcaagcattaccaaggttaattaactgtgaaatcgatcgtcag

gaatcttgactcctaaaatttcgttcacttggtgttttttgcgagtatctgctagggtatcatctttatggtttcgatcaccaaatctgatgcagaccg  
taaaacttctggctgatcaccaagattgtgcaaaaatgtaagatatagtcataaactgtcgtgtctcattgtcaaaagctggtatctta  
aggtttctaagtatcggaagcacctagcaatgtcgagccagtggtgcctttacgcctaggtaatctctttcagcctttacgggatccctcagta  
gtaggaacatagtttctgtacttctgagtgaaatccctgaggaagagcctcagctttactagtcctgctcagtagccatctcgacacattaa  
cacgattagcaagtactctggctctcctgtaggtctgtatcgctcttgacacgaatcttcgatcagggttcgtaaccaaatttgacattgcattg  
taactatactgcgactgtcaattctaggtttatccttgcgttccatgtttggaggaatcttcgatcctccttggaaatttactcgcacatgattg  
tgagtggcggacggttaagttccttctgctattgtattggatattagctactagggtgaaaaagcaagtggtatattgggtttctcaggaataaagtg  
ctacagcgcacgataacgtgtgccttaagaaaatgtaacttttggcttctttacgtaattaaagcctctcgttattgattctttcggtttctt  
agtaaatgaaacaacacattgtgaataaacagattgtttattatctggtttttacggtttatcaccttgttgccttatggatgtagatgga  
caaaaacttactacgattaagctgtacctgctaagtagcatagtgaaatgggtattaaaggatagttggatgctactgaaaaagatttctct  
aaactaagagttaggaaaagaagccttgagaggatgactgatgacgagctgtttgaaggagacgattgggatagcctggatgtgcaagcggg  
agatgaaattgagcataaattacaaaacaacaccattggattacaagggtattcagtcgatgaatatttagaggtgaatgatcaggaaccacat  
cgattacaacagcaactgatcgagatgctgctcaacaatggatctatccaatcaacgtgtcatttcgggattatcaattcaacatagtcaaaaa  
gcaacttttcaaacggtttggtgtcttgcgacagcctcggaaaaacgtttatagctgcgacgggtgatgatgaattactttcgatggtcccaa  
aagttatgttatattatggctcctacaaaaccattagtgactcagcaaatggaagcgtgttataaaataacaggaattccacgaaagaaaacgg  
cagaattgagtggtcaagtcaggttggtatccgaaatcagtaactcaagaagaaatgtatttttgtaactcctcagacacttttaacgatat  
aaagcatggaatttggatcgcaaaaagtatcatgtttggtattgatgaggcgcacgcagtagtggaaactatgcttatgtagaggttctcgt  
ctgctactttgaaaataaaaactttcgaatcttagcgttgagcgaaccccggaagtaagattgatactatcaaaaacttatcgactccctgc  
acatttctgcatagaaaatccgtaatgaaactagcatcgatctcgtcagtagtacataaaaaggaagtgatagaattctagtgacttatctc  
cggacataatagacttaagggatcgtttgcgtctcttttagaaccaatgctgttaaagttgaaccaaggaataattaccgagtaaaaatgcg  
agagacattaattcgttactctagtagcaagcaaaaacagcttttttagctacttccgggcaaaaacttgcataaaccagttgggacattttaa  
atacatttgacgcacttgctaccttgcgtatcctcttaattactaatgaatcatggtgtcaggcccttttgcgaaaagctcaagaaattgaagaa  
gaatgtccacagggcgagcaggttataaaagaagattttgcgaatcccgaatttaaactcttaatagtcgatactaaaaatttgcctcagaat  
aatgattttatgggcatccgaagctgaaacacctgcaagaaattgtagtaaatcatttgacgtgggaagtaagacaatggaaacaccagaat  
tatgatttttgcgagattcgatccagtcgcaagaaatatttcgaataactagtcggcactatcctattgtaaggccggcaatttctgtggtcagt  
cttcagttcgaagaccacaggaatgtctcaaaaaacacaaaatgaaacagtgaaacaatccagaaaggtgatttaatacactgatagctac  
ttctatagtgagaaggttggatattggagaagtcgacatgattatttgcctcagatgcctctcgtcaccaattcgaatgctgcagcggatgggt  
agaactggtagaaagcgtatggttataattacatgctcttaacagagaaaagaagaagcgaatgggagcgtgcaaaagatgctcataaa  
aaaattcaagataatattattaatggaaggggctcgttttgcgataaaaatcatagaattctcccaaagagattcagcctgtgtgcgaaaaa  
aaggttggagattccaaaagaaatgtgtcctctgtgagttcaaatgaaaaacaaaagcaaaaagcgaagaaagattttttatgccag  
aaaatgcattgcaggtttgtacaagatcaagcttcaaaaacctaagctcgtctactgttgaagaagctttgaaatttgaagatgatctt  
tctccaaacatgatgaacaattattatattatagacaagttccaaagaggacgatagatacataaaggacgagatttataaaacatgaatac  
gacgggcccgggtcccccattccttggcttgaatgcatacaatcatcttgaataatagatcggcacaagattcctcgataacttataatgg  
aaagatataatcaacagagctgaaagaagaaacatgaatgattcttctataagaaccgaagatgaatgatataaagcaacatttgaatg  
ctagcttgaagtattatatttcaactccttttctaataatagagcaagagaatctagacttttgcataaagaaagattagaacaccgaaat  
acaccaattggataacgatgtaaacgcggcaactacagacgaaaacctagagaaagattcctcaaatataaaccttaccctccaaaattata  
gaaatagagataccggttcttatacggatagacaacatcgccttcagcagttagtgaaaggcgaagcgaatcgaaggaatgtgggtatagaa  
gggaacagaatcattcatttttttttactttaaattacaaattttaattttataatccaattcaagagatagtcagatcattcatttgg  
tttctgactttccatgtggatcccaactattgtctcataaccgcaataagaattgattggtttctggatattcttcaagcgttctttaaactt  
tcaaaaattcctcaagggtgctattgtgtattactagtttagaacaatcgttagatcgatactcagcggcacattaacaaacttacttgaactt  
tcagagagtaaaaaacaaaagataaccattgctaggtgtccttgggaattcctttaaactatctcttctgattgagatgaaagtctttccgtg  
taaagagaagcacaagggcagcaagagaagtgataaaaatacaagccacagcgttctttctgttttatttcttagaaatattcataacat  
taacttactcaagatgtaggcaaaaaccttagaccacacaacatcgttattcttggagaatcgtaagcgtattgttagtcaaatacagcctta  
agcaattaaaggataatagttttaaactatagttgaacaaacctaaagagaattgggcaaggctccttctgtagcatgtctttgaaac  
ggtctttagcacagactactgatcgtgaaacagagtcagtaagtaaaaattataaaattgtgatattaccaatttcttagacaaaagttccgc  
tatgtacagttagttacgagattatagtttaacaaaggccttacctccaaacctcatccttcttataaaaatgaggaatcagttccaa  
aaccaaatcttttcttttggatcattgcaatggtattcagatctattccttacaacggaaatcaatcccttttctataagtgaaagaggtggt  
ccactaccctggaagcaactataaattgggtcgaaaaagtagttcaaggataaaacattttacattggagatgtgtgaaatagcatatattgct

tgaatagaacttaaaatatatacacacaaggataatagttaaagatgtttgaaatacattaaacctatataaaaaaacaccaccagttgtgaa  
taataacatgttgaaaatTTTTgtGCCAACAAAAACGCTTTTTCTTTTacttaaatatacgaactcaagaaatgataaaggggagaacaggaa  
aaggtaaactgaaaaagacagaggaagaagtcgaaaatgtgagatagtcggTTTTactTTTTgcaattgtaacgacatcttCGTCCAACAAA  
acatgagcaagaccaacacgcatGCCGGGataaggaacacttTACCCAAACGtaagcgtgcttgaattggctcttaatactagagtgaatgtt  
gttacagaaatctcaacactagagtGACCAGAACgaagaatgacaggTCCGAATagtcaggatcaaggCCCTaggacgagtgtaaatACG  
aaccaagtttagatagcccacattgttGCTtaagttCGTcaatgttccaacccttGtaccgCagataggaacagcgttaggaatacggTCgac  
aagTCCAATcttccaatgaattcatcgatcttGttaggatgtaaatGCTggaatagcaacgatttCCTTctaagacgtcaatcaagtcatc  
aatagTGGcatGCAACggaaggcaatcagctgaattGACacggTattCGTgcatacggcagGatttCGTCCagatcaatgtgattgaggG  
ggacagTgttggaatgttaataccaccagTtCCTTcttGAAAcaaatattCGGaggatCCTTgttcaagcgaatGCCAAAaccttctaattct  
tctcaaatGCGcttatgagacatgggcttCaggacatCCAAAcaatGAAATaggTtGcatgtacgagcaaccGtaataacttGcttacc  
acgaccacggCGcttGgCacctcGataataccaggcaagTcaagaatttggattttagcaccGttatactgcatgacaccaggGactgtcgt  
taatgtagTaaactataagcagcGcttactacgagTaccggtcatctGttcatcaatgtacttttaccgacggaggGaaatccaataaagcc  
aacggtaccaataccggtacgagaaacatcGaaaccgactagaagagTtagctttaaaccaatgtaaagTcaaatTTTTagTaaacaaaatac  
ataccaccaccGCCaccaccgCctacCGgtcggtgTaatgagctcGcgttCagTTTTgcaagcttggcttTaaagcatGCCAAATgcttagcc  
gtagcttGTTTTTggGctctcattcatcttCGatGcttGatccttGagctgtggTcgacatttTggttCCcttccaagatgtgatattgga  
aatggtcaggttGAAAAAaagacttGctacgTaatatttCGgttGttCCgCGGcaataaattcatattatcaggttatCCgCGgttG  
ttaatggTaaattcgctattgtTTTTgctatttactgagctGcttaaaaagTtCGTgtGctgctactctcatatttacttaccgaatattcttct  
gtCCctaactgatttTgtatgtgtttatacGatatgaacctgggaagagaatCGAAAacgttTctgcaatttTcgaatagcttTataaaa  
aataaataaataatctcaaaattacagagtagtcagaccgGttGCCaagTtgaagtagtcactataattccaatGAAAagggtagg  
gcaatcGtagaaaccgtcattcaaacgaatatGccttGctaacgagacaaagTacttccataattgTtaagaatCGTAAAagcaact  
agacttTtagttccaagatttgggatggatggatgggagTacatcttTtGcttGcttGtagttGcagcttGcaattGcagacCttatGct  
tGTTTTcagttTcaagttcaccAAAagaagaacatGaaaacaggttggcattCCctcatagTgcaaaaagTtcaaaatcctagaactccac  
gaatGaaatttgggagAAAAaataGaaagcaaaatGaaagTcatcagcaatttTaaagaataggTacgaatattataaagcatcaagata  
acagttgagaatgattaataaaatgactTTTTctccatacctaataattgtcttGagcaataaagTtcaaaaacaacacgagtttatcaagca  
ggagaatcttagaaaagataagggataacggcatggcGatcttctggataccgCgagaaatgggaacggTaccaagaatgaatacggtagggc  
cgtggaagcatcaacagTaccctCGtaaaaagaaccaccagatgggttctGcttGcattccagCGGcaaatagcaaccaaaccattcaatcc  
attcacagaaatagttggacaagagacataggtGaaaagaccaccGtaaggaaatttGaatgagattGaaaggacGaaataacctcttGct  
actggaaggggaggaagTctgggagggTtGTTTTgttGcttGcaggttGcttCGcggaggTctacagTatattgtcatgatacaaatG  
ccaatccaacAAAaagccaattagTctctcaaatgaaccaaggcaaggagactgggtgttGtGcaccgtggcctGcagcaagtacaagc  
ctatggacattccGtaaggaagTgaataaaatggcggaaataaacacagTccaatGcataggagagacgtgaggagcgaagacgagTggac  
ccagatagcaggttggcatagTggatcataaacataaaggccagcGtttacGaaatagatccaagTcacGaaagcatacgtCCCCaAAA  
cccaggagccagagaatggTtcttGctgcaatGcatataaaaagTtaacaggagctactagTtccataagTaccagccgagacgacctggT  
atgtagcccctGaaaacaaactGtCGgtGtGtagTTTTccatgaggagcattcaaaacgacacaaatgggaacacaccacaacgTatgt  
tttaataaattcaataatcggTatacagcattgatacttagtaaatgattacttGcttcttTaaacaaaatttaacaatcagcGatGcttTta  
gaaatGctGatccGtaaacaaatcaagTgcTcctaataGcaactaagctcacaccctatcaagatggactattgatatacggatcctgatcca  
atccttctccttGatagtagaagTgactggctttagagtagtagtattgtggggTcgggatttCGGcgtctatatatatatagagTgcac  
ccaaacatacttGcttGtacgacacgcatTaaagTaaagcaaatctctGtCCctcaggaagaagTtcttTctTTTTcttttataac  
agtataatttctGcttGaaGaaaataactcaaatctattgatctagattagTtcttTatagactcattaatcgttccatacttttatacct  
atcttGtcccGtgatctcataatggTacaatccgctGcttgggttCCctGtatCGgtAAAAaccgtgaattAAAAaggctaccaggGca  
tactggagTgtaagatttctGCCgatgattcaaaactGtccaagTccttGcttGgagcactggaagcttcaaaaggccaaggttGtac  
attGctccttcaatgacttTcttttacgatcaaatcatggatcacttTtacttTcaacgcgattcccGagcGctacttaagtatgacttGactc  
ctttagatacctatttGcatgggtGgtgatGcaacGtcccGctGcagcggtaagcctGctGctgatgttCcttcaGaaatggTcaaatgg  
ttgattctaactatcatttTtagaccCGaagTctGacaagaccgattTcaagTgaaTccaacaaaggcttGtagcagTtctcGaggcca  
agcaagctggTattcaaacCGtcccGcttattggGcctgttacttTcttGctcGaaaggccaccaaggaatcatCGcCAAaccatcga  
ccttTtGcctaagcttacttGctctatgttGagcttTgaagaagcttGtagaagccggTgCGaatccgttcaaatGatgagccattcttGctc  
cgacttggccgatgaggTccttaacagctacaagTctacttacgagaccTtGctcaagccaatGtaagTcatcttGactacTacttTgtcctt  
tgaaggacaacGctcaagTtTgaagggtctccctGtCGcggTatccatGctgatgttGccgtGctcTgaaaactggatGctGcttctGctc  
cttggTgacaaccaagTctctGctGctgattGctctggTgTaaacatctggaagactgatttcaaaaggccgTtGcgttattGaaaaggcca

ttgctgccattggtagcgaccgtgttatcgctccttcttcttagcattctccacatccctcactctcttctgggaagaccaattgaaacctgaaat  
taagcgtggttcgcttttccgctcgagaagtgtgctgaattagccatcttgaccaaagctgcaatgaggggctgcttctgctgctgaactc  
gaagctaatacggttgacgccaaggctcgtgttgagccccatcaccaacgttaaggctgctcgtgaccgcaagctgctgctcactcctgaaatg  
cacaccgtgatactcccttgaaaaagcgttactcccttcaacaagaatccctaaactccctcaattccctactaccactattggttcttccctcaa  
accaaggagattcgtgctactagaaaacaagtttgtaagggttaatttccgctgaagaatatgatgcttcattcgcaaggaaattaccgatgtg  
tcaagttcaagagaacattggtctcgatgtgctggccatggtgagcctgaacgtaatgataggttcaatacttgggaacaaatggaaggct  
tcgtttccaccctaacggttggtgcaatcttatggatctcgtgctcctccatcatcgttggatgatttcccgtcctggtcctatgactgct  
aaggatgctgctttgctcaatctatcacctcaaaccatgaagggtatgcttaccgctccatcaccattttgagatggtccttccctcgtgatga  
gttgaagaatctattcaagctcaacaaatcgctcttgcttaagagatgaagtttggacctgaaaaggcaggcgttcgcttatccaatcgat  
gaaccgctttgctgagggtcttctcctcctcgtactgactgggctcagatgtcactatgctgcaaggcttccgtttggctactggtggtgtt  
aaggatgacactcaatccactctcatttctgctattctgacttcaatgatattcttggatgctattcaaggatggatgctgatgttcttattgag  
aactccaagtctgatagaagtaagtctgttcttagtaactacaagtctgtattggacctggtctttcgacattcactctcctcgttccccag  
ttgaggaatcaagcaacgattgatgctctcgttcagctgtccctaagaatcgctttggatcaaccctgattgtggttgaagactcgaggctgg  
cccagaccactgctgactggaaaacatgattgtggtacccgtgctgttcgtgagcaaatgcttaagggttagcctaattggtatttacatccaaa  
taggcatttcatgataattaaggaaagaaaaaagaaaaataaggttgggttgaacttcaacatggtaaccggtaatgaaacgatttatgct  
atggtaatgtttctagaaccgatagctgtttctcatcaactgagggtaaacagttgataaattttgctatgcatggcatcttcttaattctttt  
taataatgtttaaaaattgcattattcttctcaagttattctaaaaaggaaggaaaggttgaactagtaagaataaagtgtatattgcattgg  
cattgtaagttgcaagctgtctaagattttatcaataaaaaattatctgcaattcaatgtttgttcttttttttcttttttttttggatagtgaata  
tgctaggaatgactagaagccgcaatacctaaaaaagatgaccaagagatacaataaaaggctgacaaagtcttagtagactttcattaaat  
gtcttttggtttatcttttaaactcttttctcagagtttgcagggatcaaaactgccgagtgcttctgtttatgcttagagattgatttttctgt  
tgtttgatagaattgataattttttactgtttgtattttataaacctcttttaggaataactgaagacaaggctcctaaagcttttcttaatttta  
aaggagcaagtaattattgctgagattgagaaccattcacttcatctacggtaagctcaatagaatgtgaactgttatgtaaaagtttag  
atgggttcttatttttctacagttgcataactaaataaagggtgagcgaattgcttcaagattgttggcaaggaataatgtttataaaaaac  
caatctcttttgcattattagcattcgttaatcgacgataataaactccagccagttaatgatgatgagattttctgagcagatctacaacattgag  
gaattcactatcataaaacagttttgagactttaattgtggtgatttaaatgcgagtaaaaaatccctttataaattgtcttttagcaaatcactt  
gcaagagactttgtttgaaatgggtgcttattgttgcgtgagatgatacatatttcttatacatgtactggagacctgaggattatcttgaag  
ttcgtttgaattaaattctgcatttgccttggctatttgacttcttttttctaatatcctcaatgaacgctgatgttctattgaaatgagctaat  
catcacataaaattcggttccccaatttgaataggagtataaacattgcaaaacatttggataaataagtaaacacaggaaaagtaacaatat  
aatgaaatctttctgtatgattataaacacagagaatacagcagtaacagcttagtatgataagatgataattggtatgctacttgcatttgtt  
acaggatgacagttgacaattttgaattgagcagcttcttattgtaactaagtgttgcactgtagcttaacaaatttctccacgaaattctt  
attttcttattcaggtaaactgcaatgtgggtctttcattaaacagaaaaggagaaaaaaaataagagagagagagagtgagagtgagag  
agtgagagagagagtgaaagagatgaattccgtgagaaaatcaacaatcatttctaacagagacttgtaaacttccagccctacaaaagtc  
cctggcgaacatcgtttgggtggaacgaaatgcaaacggaaggaatgatcttcaaatgttcttctgaaatagcaatttctaaactagtcgaggt  
acgttacgatccccttgcgaatcaataaaaccaatctccagaaatttccctaaaatcggttttcaaaactttgaaacttgggacacgagaca  
gctatcatccacaggaatttttgatttaataataacattcaatggtatcatctataaaagctatctgtatggaatacgaatttatgttctaatc  
aagcttcatctattgaagaacgcaaacgggagattcatatgtatgagctcctaatttgaaaaataaacgtaaatgattaaaaactgttttct  
tactgattatttcaataattacaagaataccatggcaatttttattacttggctatattcaagaagaaggaacaacattgttacttggcggg  
ctcactaagatgatagaaacggcgataaggaagactgctatgtagccatcgatgaggtatccgtgaagcttgatataataactaagcggcta  
aatggcatgaaaactgctataaacagccaattaattggcagtttctgtgttaagagaatctttttcccatatataacacgcttggctgtt  
cccatagccttctgttctgaagggtcactcgtgaagggttgaaaaaaggcagctaaatcctctttttttttttgattttacgaaaaggatac  
ttggttttgaacttgcgtaccaggaattgcaaatatggcgagcgttttaacggatgaacgatctacagatggagactgtttgctcagcaaga  
tcaaacacctgggatctacgacttctcaaccggaatgaaaaagtgaagtgttccatgaaatggcgcaggtgtaaaatgaaacagtcagatg  
gggttctcagatgccgacagtgatgatgattgatcagaagtatgggtcacaagccggtactcaccggacctttaaagtcttgaagcttgc  
ggctagctttgctgcatggatgtgtcagcggagttcgtcttaccatttagttatggtgtcacatttgggtgacgggcttactgggtgagtatgct  
ggtcacaggtgtgtcctacaattaccgctccttctggctgaattctgttctgcttaccacgctggatccgtttatctgtgggctgctgaagc  
aggtggaccccaactggacgcttttccagcttttgggttgggtggtcactactcgtggacaactttgttgcctcactgctcagttgtgta  
aactttattttggcgaagttagcactttcgaaacagttggtcgcagacgattctaactgtaaaattcgtcagttcaatggatcgttctgaagt  
tgttttagtatttattcttctgcaatcagatccaccacggctactacagatgggtctttaaactttccatgattctgatcttgttattatactaa



atttgatttggttcccatcgccacctctagaaaaagccatggattccaatccgccaatgggtctttactgagaccatctacgatcaagccggcta  
cagcaagaagtgtatgattcaagtggaaacgtcgataccaactgtccaagcttgtccagaggctggcagtggtgcttattttgcgtct  
gctggtgaatcgctggctatgatgcttcgggacacatcgctgaagagaccaaagatgcctctaataaagctgctcgaggaatctctttccgcct  
ttacatcctcgattgtagcttttagtcttacgattctcttttattctgttgcctccactagatacctttaacgatattatgtacaatacggctcacctc  
aacgtttgcaatttttattcctatgtgtgggacgcggaggatggtatcatgaatgtgatcattattcttgagttattttgaatgccgtgattgg  
tgtgttagcctgtagtgccttggtattcggcgtctctcgcatgggtgcttgcctttctctggctggatcagtcaggtaagtaagaaggacaaccaa  
aaaatgctattacggtaattacattgtttccgcttggcttcttgtaccatattgccagttcagttgccttctctcccttgtttccgcagctggtgca  
cccagtttgcttgctatgctcttctgcttttggccgttggcttaccctgataaattccctaaaggtaaatggctcctggaatcttttagcaaac  
ccttcatggtgttttcttgtttacaactcattcgattttattcaacatttctccttattcttctgtaactggttcgaattcaattatgccattgtc  
attacaggagctgctctatattgtagtcatatgcaccttagtgatcccacgttctcgatggattgctaactcgctatcgatagaccaagcatatc  
ttccaacgcaagatgaaaaataacacctacgtttaaaaaagtacaaaaatacactagcatttaattctcccctaataattctctgtgcttta  
caaatgaaagcataagcgatccaggtctggaattctgttgatattgacacagtgctttcttattctttcttacgccattattgagcgactataa  
tctttttggaaatacggtaattttttgtttctattaataaaattggttattggaacgagtaacttaagcagtaatataggaatcagcaacca  
tgctttttgaaagaaaaataacatctgtaactgtatgttcttagcatgatcatgcatgcaaaattcctttcttctgaagaagacaaaaagaa  
gattttgcttctggtgaggctcgaactcacgacctccccttcatcttagagaggacgctaccaccaactgagctacagaagcttctgtggtga  
agaggataattcaagctatattccatattgactaatgtgttataaaagggtgaacaaggatctaatagcacaagaatattgttttggtgaatt  
cattgaatttgtagctagaaaataggttctcgttagcattcaatgcaattcgtccttactgtgcttttaattcttagaactttttattgtgtaa  
gaaagcaaggcaaaagcgagaaacgacagcatcttctcgtgctgaaatgatcttcatgtattaatggattctaagttgctttcattgact  
gtatcaatgtttatacttacaatacaaaactcatgtttgtttgatagcagcattcccacaaatttttagactagaaagaaatttgatccatcagg  
tcaacaaaaataaattctcattttccatgttctttgtatattgaacagaataaaaactgtatagttttctcatatgcaacatctgtttcatttta  
ctagtacaattgttattttttgggagagtctgattcctacactcctgtgctttattactaagaaccccccaagacaaatccttattgagttatc  
tgcaaatcctatatattgatatttactgtaaacaaacaaattgtacaaaactaacatctttccttaataacataaactccttatcctctttat  
aactgttaatttctactcgttttgattccttttttagttcattttttggctgcttctttctgttgattcacttctgctgtaaattgctaatgct  
tatattctgtgtaaaatgtcttccctttgtctgattttccagaggctcttaggttaggttacgatttgctcgtggtgaaagttactaatgcagta  
atccactagaacagattgtatagaggaagatagccatggggctcctcaacaccaaccaattggaaccgggaaatggctcctcaagaggtt  
cgatggctctcatcaagaagcttccaggaggcgtcttgaatgaaccaagaatctacgcattcgattcattaaagcatagacgagcttattct  
gataataacgatctgttaaatgatcaaggcttacagtaccctgcttctcctttaccacaaaaacatgagaccgagaaagccctcaaaaaaca  
aaaactcccatgagcacctgctttgaggaatggctaccatcgtaaaatacaataactctagtcctttgaaaagcttcttagatttctgcttcca  
catcacctaccagacgaggtattcctctcatggcaattaatgcaaatcaataactccttaggaaccataatcttcatggaaaagcaataacgaa  
gactcttcttacctgacctgtagagcaacataactcctttcaaacctcttctgcctggattgcaatagactcctattcgccttcaagag  
tatcaacgaaaaagaactattgaaaaggaaagatgacaatcatttgaaaaactaacatcaacacctatttctattcaagagatcccatggga  
agagagaatgccacaccagaaacccgacaatcatttaagtctcctcttagaagttcatggatacttggaggaaagttgacgcatgac  
gatgtaacatgccctcatctgtgaagattagaaaaactcgggaattactttctttgttcaattggagttgcaatgttatgtgatccatacaaaa  
agagcttcgagaagcaaaagacagctagccttgaagaccaagagctggaatcttacaaccaagctaaaaaatgctggtttatcttgattc  
ttataaatatgttattatgagactcagtggtcgtgataaatttactttgttcccttactgtgattttttattctgtatttactcctttaaattct  
ctattaatcctgaataagatattttagaatacgtttatggacagtgtttgttactagcatactcattatgtaaaaaagccaagatttactca  
aatcataatcaaatcggaatgagagataaggtgtcatatcatttagtttaagggtttgcaaactgaaagactagtgcagaactgaaactttt  
gtctcaaatcatgatccatcatgatgactacatttcttaataagaagtcaacaaaaaaaagtgcgaaaaggcttaccatctttaaagat  
cccatttattcgtttgaaacaaagctccaagttagtttagctcaacaacttctcggaagacaaactcctgaaggagaagcgttgacaagata  
aaacttttactgaaacacaacgctcaaaaggcagcaactgcaaggatttaagtttagcatttttgaaatagctcatgatttctattg  
attgcttattcgatgatcccacatcgccatctaagttgttcagttgaacattgaacatttctcaaaggccttttcaaaggcaaccatttctttg  
ttgtcttgagaagcttcttactctcagcgggtcgtataaccagaacggatccgtgtcgagaaactttatcacttggctgaaaactcttt  
ctttcatttccgcatctgttaattccatgcctcgaataagcagatgtaacaggaagcatgtgtggacgaatgcaactgttggcaaacggctc  
cattctagagcaaccaagtgagctaaaggctgcatagtagtaggaattctagtttttgcagaaggtgtttcaaggaatgtcgtccagcttta  
caaaccttttccattctaccggagacggatgtgttttcaaaaacggcgaagccatcagattttacattgtttttgattgattagcgaaaa  
atcttagaaaacagctgtttcttgcctaaactaattccacgtagcatcatcgctcaaaagggaaggaagttattttcttattcaattacagatagat  
agtactgaaattaccaggtcattccttttaataaaaacaatcgcttgcagaataacttctcagaaggaacgacagagttatcttcagttgc  
tgctgtaaacctttcgagctgtttaatgttaatagaaaggttaaccgagaatagtgagaatccgtctttcggttagtgagctggttacatttata

ttaatattagttaaagaaaaatattatatgaaattgttttaagcaactgtgcaggcttgatctcgtttgaaaactaggttagcatgaatacataat  
gaatcaaggtagcggattaaatctttcataaagcaaacgaaagatgtttaactagcactagcagaagggtctacattgatacactagtca  
agctgttgaactcgactattatcactctcgaagcatactcataacgaataaaccactcgattaagtttaacgacaacaaaaagaattagacat  
atagattatcattatcaaaattgcaagactacatttctgaaccggcagagaaattcacataacagtaaacaaggaagaggataaaaaaggc  
catggacaagctaactgcaagaaatcggaagaaagtaaaaggtaaaagaaagagagagcttataaacaacagagatattacaaggaaa  
gaaccatgttaaaggacaacttctttttccatttccgctgtcagttcttttaggcgcttgaattttggtagtgagagcgtgtaattcagag  
gaaacaagttcgactgcttccggcaattcattttgttgatcagtagaaactcgcaactagttctccatcttgagaagtaaaagactgtgctt  
cttttcaatttcttttctcgtctcgacgtaaacgctcgtctttgtccatcgaccatagattcatcgtgcaacaatgttatagcatcatcaac  
atttaccctggatcgcttgtgctttttctttaaactcaagagcatcacttatttgcatttgcctcttggtatccatcgtcctctgttcaat  
atctcatcttctcaggtatggctccacttctgctaattcagctcctcgtacgcttgaattttcctccctcaaggttcaaatcttagacgcacc  
tctttcagcggcataatcggcatgcttgggatctgtaacaaaggttaacttgcagcacacctagtagcacccaataaaacctcaaaatcaat  
tgaagacttctccccagcttctttctgagcgttaaatttcttcccttgatataatattcaccacaagtagacatttcatagagaacggtaac  
atagacgtacagctgcttctcctcattcggccttgacttttctttcttggaggaggtaccgaaggatcataatcaggtggaatgacttgtg  
agaaccttctttccgacatttgtgtacgtttaaataataaaattccaagaaaattgacttttccctcaacgactaccaatgctttcagatttaca  
aaactctgtaaacgcaagcaagtctactactaagaatgttaaattctacacgctccaaataaatgatggtaaaggacagcttctgtttgc  
ctttcagacttatttcttctgaaaataccgagctagaaccaccgctataaggtaaacaaagttacaaagtcaatctttctacgattttttac  
agcaatccgcaagcattgtctacataaagcaagtttatgcatgaatagtacttttaacgagtcacgagaaagtttagcaatttgaagacttgta  
acagattgctattaacgctgttaggaagctccaggtaataaaaaaaaaaaaaaaaaaagcaagaatgaatattacagaaaaacgtatcggc  
tatatgaaggagtggaaactataccatataatataatcgttagagtaatttggaaactttcaaaaaagaccacataatccagctcactactca  
ttgactgaaataagcaaatgagaaaaagagagataaaactttgtcaaaggaataggtgaacatgaaacgaaacgaagtgcagaattcaatg  
accgcatgaaaaaagagtaggataaaagggggccatataataaattccaaagtcatgattaggtataaacaatgcaaaagaaaagtcga  
catttgatgggaagtcaaaccgttgattgcatcgaactcaaagcataagttcataggacaaacctactaaaaatcacatttcaatgttac  
atagaagttagaaaaacaagaacgaaaaaaggatcggattttaaagcaaggagtcagatgagtgaaatcctgtaatacagcagcaacgacc  
tcgatggataacattgatctcagataatggagcaatcttccccacagcttcccaagttcgtccaacagttgaaggatggataaggaag  
ggcattgagaaaattcagataaaagatcatcacttgagcagggctctgtcgcgtctctcaaagctaaaactaaagagcatttctaaaac  
atagctgcataggcagaacaaacaagagctattgtacgaagtagcggaaattgcaagttagcagaaaagctggtgtgcttccaactcgacg  
acacggtccaccaagatagacaaaacgctcgttttagacctttagatagaggtatctgcgacaggatgggtgggcatatcgaagcagaa  
aattttctttcagttcaagaatgcctttatcgacaaaactttgacgagcgttccaggactgacgaagttgataccaattttcatgacattcc  
acgtttcggcctcatcaagcaatccaagaagtaaccgacattggttactcagtgatcaatctttatggcttcatcaagcaatacttgcgccgt  
caatcgcacacaggtccaccaagcagcagcagctgggaaacgcttgcattcacatcttctgcatacgaacttccgcaagaaagcaa  
gctcgattaatgacaccgcaagagaatcagagatactcattccaaaaagacagataaccctgttctttagaccgcaacagactt  
ctccataagagtcacttccggttcttctcacttccagcacttctcaagatcttgggatcaaatgcaattttatgatcttcatcagattctgcgc  
ttgcttttcatatgacacattttggttctgttcttctcgaagttgctgaagcagcttcttccgagataatccgcttgcataatttaatt  
gagagtctcaatgtatataaatgatgttctgctgacggttctaacgaccgagagaatatacaacctactcaagtttgaggactgaatctt  
gaaaccagttccgtcaaaagcttataaaagcagatctttatctgttttaagaacaaatgagcacactgaatgttttagttaaacagtggtgc  
tccaaggggttcaaaagtcacaaaatcccacaacaatcgtaaggacaagcacctataaacaatacaatcctaccgaaactattccctcaagta  
ttaccacagattgaaaacttctccttgacactaaagatgtaaactatgcaatgaatgttaaagtcatactacctcagtttaaggtcctggaagtt  
gcttttgacgagccataacaaactgcagattaccaaatgctgcagacactgaagctggtattttattttatttaccacaagaaggaaatttaca  
gaaagatgcaagaataaacttatagaaatgaatggttaaaatcagaatctgaaggctcaataaatagtaagcgaacaaacgatatgtataga  
cactcgcaacatgtaagggaaaaaacggtccctaaaccgtgctaggttttataagaatttttgaaaagaatggaaagaaacactagat  
atggaatggattcaagatatacatgcaagagaaggggaattacaaaatgagctcggatgcaaaaatttctgtaattttgcaaatgttgggcaga  
gtagaaggaagggcatgagcaggccatgtgaaatctgttgatggatggcgagaaagactgttagagtttccgaaatcaaggggagggcatt  
tgctccatttccgcaagaagccgaagaagggagatcttgagaagttgccaagagagccaaaagagcttggttatagactgagtggtga  
caagcttgacgtatgcatagacgctagcatgcttgcagatgggagaaaaaggaatgtgcgagaaggggatctagaaaattaagcagcagcaca  
agcatggagtcgcaagagcgcgggaaagaggaaagtaagtagacacgttggagaagcggaggcgggaagatgtagggtgttggaaagtc  
gcgggacaaaatgggcatggaaagttgatgcaactggaagctagactgacaggtgaggagtcgatgacgatagacaattaggtcggtagcct  
ctgttcagaatgagcaagagactctcgagagtgacaaaaacttctccgggtgtttggaggagggtgaactccaagagtagttggagcacct  
cgagaaaggatttctgacttcatcatcagaaggagaagggggagggtgacgagaaagtcgatgttcaaaagacgattgacgttacgcgga

agaggtatatgaacctgaaaaggaggtccatggtatccaagaggcgagtagaagcgggataataggttgggacaacgggcttcgcttctt  
ggcttgaatgaaaaagctcaaaaagctcgtccaaaggctcattttaaaggcgcatgaggaagaaagaagaggcagatgaggaagcgggtg  
tgtgagacacggcaattgggtgaaaaagcagttgactgaggtagcaaaaacccagcattgacgacgaacagcagcaagaaaaacgcgaaa  
gatgagaaggagaaatgagcaaaaacgagatattaagcacatattaggagcattatcgagcgaaaaataaaaaataaaaagcaaaaacaaaaac  
tagacaaaaagaaggtaaactaaagcaagatagtagaaaatacaaaaaaagaaaccaagaaaaagaatcacagaaaagagacccaaata  
tgatTTTTCTACCAAGGGGAACAATGAGAAGGGCTTAGCAATAGCAATTCGTAACAGGCTTGGGATATTAACAATAAGAACTAGCAA  
ATCTTCTACGAAGTAGTACGAAGAGAAGATGTGCTTGAAGGAATAGACGAAGTTGGAAAATAAGGAAAAACCGTACTACAACGAGTG  
GTAGCTAACTCTTACGAAACATCATTATCGTAAAAGGGATAACGAAGTGTAAAAAATAGTATCAATAGAAAATAATAAGAAAAG  
AAGAGTAAAAATTTTCTGTTTTTATTTTATCTACGTGGTTCCATCCTTACACTTTTATCTTGTCTGCTTTCTTTGTTTAGCGGTT  
AGGACCATTTGCATCACGAAAGCTAAAAATGCAATGCCTTTTCTATTGGATATCGTTATAACTCCGCAGAGGCAATCTTACCCCATGTTAAA  
ACAATGATCGCATGTTTCTGATTGTCCCGTACTATTGTTTCTTGGACTATTTACATTTCTTTGTGACATTTCTTGAATATCAGGATGTT  
AAAACTCTTACTTCTCAACTGATAATAGATGGAAACAGATATTACAGCTGTATAATAATAAAAACTTACTTTAGTTTATGATGCCGTT  
ATGCTTATTTTTATACTATTCTTCTGTTTCTTTATTTTCTATGATCAACGTCAACATTCAGGATATCAATAGCTCCACCCGATT  
CAATGTTGATTATCTATAATTTAATTTAACAATAAAATCATTTTAGCCATTCATGGAATTCAGAGGAGAACGTTAAGGCCTATAGG  
CTGTCATTTGGCACTAAGTAAACCCAGAAAAACCGCATTAACCTTTCTTTAGGGTGGGGTCAATAGCTAACTAGATCGGCTCTC  
GTATTTGGAATTTGTTCCCCACTTACACTTATACCGGCTTCTTCCCTGCCGGTGGGTTTCATTCTAGCCTGACTTTCTTTTTTTTT  
ATATTTCTTTCTCCTACCCTCCTGCTGCTTAAAGTTTCTATACCAAGTCACTACGTTGGTAAAAGAAAAACAAAAACTGAGCTTT  
GTATTTGAAAGGAGCGAATCCTATACTTTCTTATTGATCAACAGTTTACTGTGTTGTCTGTTGTGTTTATCGTTTTGCTCGCTACTATT  
ATCTCCTATTCTTTTTACACAAAAAAGGAATTTCTCTGGAATCTTGTGCTTTGGAAAGATTTGACCTATTCTGGCTGTCTCTGTG  
ATCTGTGTGTTTACCTTTCTGTTAAGTTGCTTGTGATTGATTTTACATACTGCTTCTCACCATGTGCTTACTAGCTTCTAACCCACTTC  
CATCAGTGGTACTCATCAGCATGCCATAACCCATCTACTCTGCGCTGCTCTTTACCCTGGTACTACTGGCGCTGACGGTAGCCATGCTA  
TGAATACGGAAGGTTCAACAACCCATCCTACTTTCTTGACACGAATCACCAAGGCTCCACAATGCTATGCCAAGTGGTGCGGTTACTCTA  
ATACTGTTGATGTCCCTACCATATCCCCAACACTGGAAGCTCGAAGCTTAAACATTTTACGCCAGTGTGCCAACCATTATGACCAAAC  
AGAAAAACTAGTACTCAAGTTCCGAGCTCCAGCTCAAAAAACAACTTTGTCCTCAGGTGCCGATTCGAACCCGGTATCCACCGTCT  
TCGTTCAACAAGAATGTAACCCGGTCTTCTTCTGCTTACTACGTTCTTCTTCTTCTTATAATCTCCTGCGCGCCATGTCAC  
CAATTCCTGATATCATGTAGCTCCTCCATGTTTTATGGTGGCTTCTCAAAATCTGTCTTCTATGTGGAAATGGCTTCTGGAACACTTCTGGTGGT  
GCTGTCTTGGCAGTTATGGCTTTCTGGCTCTGATGGTGTATTTATCCCTGGTTCCACATGCTAATTCGTACTGATCTTGACGAGTTAA  
TTATGCTGTGGTCTTCTTATATGTTGGTTCTATTTTCCATGCTTATACCATATGTACGACTCCAGCTCGCTTTCTTTGTTTGTGCTACTC  
TCGATGAACGTTCTGTTGATTGGCTCCGGCTATTTCAAGACTCCGGTGGTGTCTCCTAATACAGCTGATCCGCGTGGGTGGTGGTTTGGTATT  
CGTGTCCGCTTTGCTTTACAATGCCCTTCCGGTATCGTACCCTGCAAAACTCATTCTCAGTGTGCTCTGTCGCTTTCCCTGGAGTTGGA  
GGGTCTTAGTCCGCTGAGGCTAATCGTAGACGTATGATGATGACGATGACAGCGATAAGGTGCTTAATTTCTTGAATATTACCTTTCCCAT  
AATTTGTTTCTTAATTTCAAACAGAGGAGTCACCAAACCTCCGATCCCTCCTCTCCTTGACTTCAATCCATTAACTATTCTTATTATGAG  
ATTATGTTTGCCTTTCTTTAGCGGTATGTTACGGTGACCAAGAACCCTAATTGAAATTCATGATCATAGTTCTAATGATGACACTTACCCT  
TACTTAGCGGCTGTTCTTGTGTACATAAATCCCTCTTACATTCTTTTTCTGTATTTTTTAAACGGTCGGTTCACATGCTTACCTTTCTCT  
TACGGAGTCTTAGCTATTGACATTTGATGACTACGAACGGAGTGAATGACGACGACAATCTATATGCTTATATATATTGAATGCTCTATCTA  
TGTGCTCTACATCTCTATTTTCTGACTTGTTCACGAGCTCTCTCTCCCAATGACCAAAGAAAAGGATATCTACCTGTACCTTTGAGCT  
CCAATCTGCTTATAGGCAGTACATGCTCTGCTTCAAAGCGCTAATTTCTTACGGTTATATTCTGCTTAGCTAGTCCATCTTCTGTACACTAT  
GCATTACATAAATAAGTAATGTGATATTTTTATCATTGTACTTCAACTATGGATAAACATCATGTTGATGACTACTACTACGGCTGAAAGT  
AGCTTTTCTTATAATGTAACAAAACGTCTATGAATTTTCTATCAAAAGTCTTCTTCTTATTTCTTGAATGCCTGTGTGTTTCTTGAAGTT  
TTAGCTGTACTTTGTGACAGTAACCTGTTAAATTTCTTAGACTCTTCTCTCTTCTTCTTTTCTTTTGGGAATTTCCGGTCTCTGCAGCT  
CAGCTGCATTGAATAAGTTTAAAGTGTGTGTTTTGTTTTCTGTTTTGTTTTGTTTTGTTTTGTTTTGTTTTGTTTTGTTTTGTTTTGTTTT  
CTCCTATAACAAGGACTGTCAACGTCTCTGCAACCAATATCTTCTTCCATTTCCAAGAGCTGAGTTCTTGAAGAGAAGTCTAACG  
ACGTTGCTGTGATTTGTGATCTTTTTCTATCTCTGAAGACGACATGCTGAATTTGGACAACAAGGAAAATGAGGTTCTTTTTCTGTAACAAGG  
AACGAAATCCCCTCTGTCTATACAGGTACAGCTCCGTTGTCGTCTCTTACAGGAAGTGGTAAAGTGGTCCCTCTCTCTCTCT  
ACTTCTGAAAAAGGAGTCTGAGTCTCTAAAAAGGCAGGCAAAAAGGATTTCAATTTTGATTCAAGAATCTCCCAACAATGTTGCTAACT  
ACAAAATCTAGCCCCTGGCTCCCTCGATGTTTCCACCTTAAAGACTCTACCAAGGTTACCCATCTCTACTACAAAGCAGCTCT  
AACAAAAGAGTTGAAAGGTTGATGCTATGCTGAGCGGACTGCTTTCTTACCCTCTGCCCCTGTGGTTCTGCTGGAACCTAATA  
CATGCTTCTTACTATTACTTACCCTGTCTTCCATCTATATCCCGTCTGTTACAGTATCGCTTATCAAGTATATATACCATGAAGCAATG

taatatcatttgctccggtgaatgaattgaactgtctggatggatcacaaagtactgtgatgccctctaaaactattgctatgaaatcattt  
ctcttgatctttcttttacttgaaccgaaccgaatgtgtgaactctatgatcgtagtattttgattcggtatatactggattatcagagtaccg  
ttcactaatatacagattcacccaatcaataaggcttgatctttggaaaccattctcatggttggagctcttcttttaacacaaatgaggccct  
caccctcatacctatgcatgaaatcttaagaatgaacacattcgcaaatattgctattcttctctgcttatttttaacaaattctattcgtaa  
ttaatctgagcaagtaactgtttgttctgatttattctcattaggcactttgtcaattcatgaccatagattctactattaggaacctataaaaca  
actgaaacatagatgactaaattcataaatggccatagttcgagcatcaaatggctctagaaaacgtatataatttaagttagcccgaagag  
aattgagcgtttcaacacatctatccttcataagtatggatgtttctttcttttcttttctattattttttcaaaaagtgaaaaattcctaataatt  
aattcttagaaaacgacattgaacattcaaccaaactgtatgtaccacatagcaattcaaccaactggaagtaccaattagtaacaaggta  
tatgttttttatcaattctttaaagtattatgtttaatattcagaattgggtttccaactataggaagactctaataagcgtggaatgcaatgctga  
agctctctgctcttctcgatctatttttcaaagatttagataaatacgtgtattcctggactatgtgatcagcaaaagatagccttttccctcaca  
atgtgaaacaggttgcaactctgtcattatgaattggagaagcgttgcgcgcaagattgacgaaccttttatcatgagattccctttttgtt  
aactgaacacgtaaaaaatgtggaagaggcacagcaacgaacgggtatccacagggacaattttgaaatgtgacaggattatcataattg  
catcctcatatcgcttttagaccgagaggaacgagcttatttattgtcgcctaataatggaagacattgtcgacatcttctacctgcccgaatg  
ctaagagtgaatcgagtagttatattgaggaagcctttggctactcaagtgtataaagcaattcaaaaattttcagatcatgaaaaatgtaca  
aggaattcttactttcaaacgcttacagcgtccctctacagattcttgggtgcttctgttcggcgttttggttattggactttacgagcaattaa  
aataattccactactagaaccttccgtatttctacctctggtttctgttttattttcagttattcaaaagcaagtcagtaagttccctttgagc  
aaacaaaacggttggctttaccactttgttctaccatggatcgtattgttaccacttttttctggtatcctaactgctttttattgcaaatgaa  
ttttatgacaaggggcttccgaacgctggccaatttctgattaaaccgaatttctgaagctgaaaagagcagcacttcttcgagtagatacatcta  
gtacttcaactaaagagtaccgaaggcaagcaagcttcttctacaaaagcttcaaaaggcagcgaacaaatcggttgcctgaaaagctt  
catgaactgtctatgaaatatacgttctgaaggcactaacgattcgccatcaacaatatcttctgaaagaaggaaatcttgctatttacagatt  
ccactttctgataacaatgcttccatagctctacacggtaacgtctacccgggtttttcgacatctcaagccaatcttcaatacaactcga  
gacaattactttcctttgttcttcaaatacagagtggttcaaaggaaaataagtcatcgaaacgaacataatcgaactgcttcgactccta  
ctgacacacaaaacggacctatccaatgacggatgtgatggcacaagcaagctgcgcttgaggcttagcaaaacttctgtacttctt  
cgttgattgacactgaaaagcttcaagtttgggtggatagtgattatcgcaataagcacatttttactccctcttgaatacgttaactgttgatgt  
tcctgaaacaagacatgagaattatgatggatcaagcataaattctatgaaataacgatagccttatttattataaccttttggtttgg  
ctactataactatatacgaatgagtggaatacagaatctatcgatctctatgattttacattaatgttacataagtagagaagaataagtt  
ttgcataatttttggttactaagatgtttgtattaagtcctacctaagcaggtataatctcatagttaatacaataaaaaattgttttgaagagc  
aattgattttgtaaatagattcatcgttcaaatttcaagtacatttcatatattcttttcttaaactccttccaactattcttatggattaagagt  
ctcataaacaatcggttttaaccgctcttttctgactttaactattattttattcattaattaagcaagcagaaaaatcagctatgctcaa  
acgttatttctattaggcgtatctgcattcgaacgctgttctgatactgttaggaagagaatggactgttcttcaagaaaaatggctcgcga  
atcctcatctgtagtatatttggttctggaggccatacaggggaatgtgaaatttacttggcgtattaaagatcatcagatcctgtacgatca  
tatgtagtagtgccgacgacaaaatgagttactcaaagcaaaggcttaatatctgataatcctcataacaagcttcaatttcacaattcctc  
gggctcggatgtaaagcaatcggttcaacgacaccttaacggctatctggagccttctattttcactgaaagctatttttggataaaaaacgg  
aatcccagatgtgattcttgaatggccagggacatgcatatttctatgtttggaaggatacgtactaaggaatcaacctacgatcgttcaact  
atagctaaccatacagtttttggtaaactatccggatagttatgtggaatcgtttgcaaggggaacaactttcactaagcggaaagatacta  
ttaccgttctgtagcgttttttagtacaatggcctgacctcgactcaaaatacaaaaggtgctgaatattgttggcattgttacttaattggatgtgca  
tgatatgtctttattaacgctgccaatatgatgattttctaaaagacttagatagaaccaaacttgatcgactaggattaggtgattattgaa  
acatgcttctatagagtacaactttcatttcttttcttcttctggtttttgttggagcattcaattcctttatgttagtttagatccaaggctaa  
agcatgactacaagtcaaacagagcatccttaataactttacattcggacatttttagttcacaacactaattagcaactttttacatgttcaa  
gttcgcttcagcttaccattgccttttggttgttgcgtccgttacatgggtgtaagcatgcaaaacctatgcttctgctaatgggtggaa  
tgagggtcaatcgaatgtagttgtgaaggaattaatgtttggaataacctgatagtagttgctggaagcatattctaaacctgtactatgat  
tcatgagaaaatctagagaaaaggtgagctagaagttgcagtttgaagcaaaaatacaaaattcttactcgatccaaggttttctacaatt  
ccataggggagcgttctgaatttttccgactaaatggggcaatccgcaccttcttctcttaggttctgatgtaccttcaaatgaatagccc  
ttattatattagctccttttctttataggttgccttaccattgtgcctttgtatccagtcagactcactatttctattgtgtctaatgaccgata  
atcgaagccaataatctgctgtcaggtaaatgattggaacatctacaacatatattagtagtacttaaaatcgacgtaggtcatcatggaggtt  
cttgaatttgaaccaaagaggtattttccaaagcattgctaaacctccttccgtcgaacaaacctatatactcaaaaattatttccggtcat  
tgaagattctaaagatgaattggcgacaatgtctgatcgtctagacggataactccaattaagtagctcctgacatttcatcgtatgtggaact  
agtttgagcggactaaccaagaatttgaaaatgagtaaaattccagtgaaactaatttctattacagtcgctatagacaaactgtaattccttctt

actttgaggaagtcaatatcgacgaaaacaggtgtgatattttcttaatggtcagtagaataattctgcaaattatgagatgctcaatgaaca  
aataaatcaggtttatattaaagataatctatttagaaaagttatgtaagatgatagctttatccactatgctttggatttcttctttgcaggca  
cgtctcttgagaacacatccaaatcatcaataaaataagtagcatctcaaacgcaaattacaggaagctcaggtaaaataatgtttcacttca  
aggaggcagttaaagccattcctccataaagtgtagattagttgcttatcattctaaaattgcaacatatagaaccaagtttagaaaaaggcatt  
aataaacataaagaattaacatcaatattatctagttgaaaacatgagattaaaggagtgccaaattgcacaagaatagcggttggaag  
caaaaacagtttagccatactggattctatcagaatggggatcaagattttctcatataaaagaatcgaaattctaaggattataactttggaac  
gataaagggcattctcaaaaggagatacaattggctcttactttgtccaatcaacaacaaaagactggcaaaagcaagaagcaaaagag  
ttgggaggtgtgaaaatagcataggaccacaaaggaccttggcgcattctctctgaaaacccattcaattgacaaattgtgtgagttgaatt  
gcagtagggcttccacaaaaggaaaataacgacaacgaaaactggatcatctacgggtgtaatttctaataaagacagtaaaagaaaa  
gcccccaaaaataacataggaacaaccaccattcgaccgagaagactaacgataagaacgcggtttgtcatttactttgccggctgttctggacc  
ttctgtcttccaatatctgttgcaaggctagcacctagaaccactaaaatcaaaggtacagcaacatcacctaccattcgaataccactggtgat  
actggcctcaacaaaagagccttctcaaaaaagaatctttgcaatggaggaacaacggcaatgaaaagagcaataacaaagagtacagag  
gagggctgaaaaatctagtaagaggataattgccttttgagcttggagttttaaactcaatgccctgagtagttcttgagtaaccgcattttcg  
gaataattgtttttgttattagttggggcttatccccgggatgtgacaaccactagaagaaggcaagtctaattgactgatattctcacgttatt  
aggagtacgcaaactctcaatttctcctcactaggattaccgtggaccgaacacgatcgtggtcttactgtcatcaggttgaataggtgaaag  
gagaattctataaccatacgaacgaagagcctgaccagctgagaaaaaattaaagatacatgataccgcgagaagcaacttttcagc  
agtgtcgtcgggaattttatccatttttaggtttccaccgtattcgaaggaagtaactaaggctagaggaagagaattggactagaaaaagttt  
cgttagcactgaatgaaacagttttgtttctgtacattttgaaagtgtatgcatgcagtagcaaaagttacgttgcgtcactaagtcaaaaaata  
cgagccatagcataagaaactattatagaactaaagacagatttagcaaaagaggaaacacaaggttgaagaggtaaaattttcatacaccgc  
tgaataataacataaaaaacaggcagaagagagagatcgataagcatttttagatttaaaccattgccgacttttcaaaaactagacatgggg  
taaagaagtaaacgtttaaattgaaatagcctaacaaattagtaattcgatcaagtgagaatgcaaaaaatagtaccttttgagattctctcg  
acaggaatcccttttgcgagaataaatctccaaggcgatgacaattacccaagatcgtctcctcaaaatcggcttcaaaagaccccaaca  
tcaattcggcctaacaaggaagacatagcaaaagaaaagaacaactaatgtcgttaaggaaaccgaaaataaaagacacaagtcaatggga  
gctgacacaaggagaaaagtcaaagagccaaaagagtttaatttttaaacttgatgaaaggtaattaaagtgaactgacgcgatttga  
aacgaaactaaaccgctacgtggcaagtagtatacagaaaagcgtaatctttgttcaatggagaacaaaagtcaaaactgtacgttcaacg  
acggatttgatatttcttgaaaaatacaaacgatttcttttctgcaaaaaatcgggctaatgatataagaaaaagccaccaaatggctgaat  
tgatgatgaaaacggtagatggagaaggaaaggagactgctaccgattcatataccgacatcctcaagtagcattgtgacttgcagggtagc  
aaggcataaaacaaagagtgcaaaagtgggattctttctatgaaatgtgagacatgaaaaggaaatgaacatctgaattcttttatgacaata  
cttgaataactggggcttcttttttgggtgattgtgaagaagatggtttatttaccattatggaataaaatacaagctggaataagggagtcg  
aaaaaaggtatggaagataattagtaaactttatggtagtaattggatttaataatcttctgtagcacagtacgttgaatattgggtatattttat  
gcctttggatatacatgttcatatagttcaaacgcttcagcgaaaatgattcatagactatgagctattttatacaaaaaactgtagttatccctac  
aacctgaagggtacagaaagcgtttgtccatataatcatattcataagtgtattgagaaaatatacactattcatgagatggattacgaaacttgc  
atgaaaatgcattttaaaattaatagattggattggcgattactgaattcagagaggaaaacagtaaaaacaatactttcattgaagaatggtc  
gatttgtcgcactgcataccaacgaaaaaaaatgtcaagattgtctactttcactcttggattccatagctcactgggattttctatacaa  
gctataaaaaagagagatccgtttttgttactaactcgtactttccagattgccttagcttagcttaaatgaccattgctgtggttcatgaaatcatc  
atgaaaggtcagttctacctcatgatttagttataaagaaggatacagggatttgaaccgtctgcaattttttttcgttctttaaactccat  
ccttatttctttagacttgaccatatctgctcacctttttattcgtatggctttttttgtcgccaattccatcatccctctacaaattaccaaacat  
tttactttcgacaactttaattttctagatttttttttatttcttaccagttataaacattcttattatcgtcacctttttttttattgatttcaat  
aataaagcaaccacttatccatccaaagacgttgtgtctattttatttaggatctacgaaccattcttatagcttgcctctccacactggaattt  
ggggtgtcgaattcgtttccggcaatttaccttcggaagccgtttctgtcattttttcatttaaaaatcttaaaaggacgtgccaggtgtgac  
cgtttccatttacctcactttctttttttacataaaaatttcttgtttttcttatagcaaaactacggctgcttgttataaggtaacgaacttt  
agcttgcctcgtattaattttgcacagaacgtaataacaaaacgtacctccaaccgagatttactttcaagatttcttctgtttcttattttttcc  
taaactattttatttaaattaaagagggttttcttctttaaagaataattcgtcgttttcgatttattggcttggattgttaaaacaggattttct  
gtttgtatactttgtcatcattcaatcaattattgggtctcctcaagcttcttcttataataataattatctgtgtttgttctgtcagactcatca  
gttatcgtaaatcattgtttctgacggaaaatctgtttgtttgttttttttgaagaaggcttcatcaactcaaaaggtcaagttgaacttt  
gatattttcagtttcatccgactcgtatgcatgaaacagatcttttagttttattgtgcctaaattaacacatccttactttctgattctattctct  
acaaggtgaacgcgtttaggttttgcatatagccattgtcctcctcaaatattttcttctatgtctattgaaaatccgggatttcaatatcctgacac  
tcctcctcttgcctttctcaagagccttctggctcgacaattcgcgctcccttaacctctaaacctcaaaagtcataaaggattgtatcagacgct

aattgctaattccactccttcttcttctaccagaataatgtatcggcttcttctcctcatccttctcgcgcagcaagttatcctcgtcatacaaag  
cgagcaaggcggacgaaaaaatctaaagcagatcctcctccatggtgaaaaaggctcgatgcatcgaagcaaaaaccagtgattatca  
gctcttgaaaaaagactatagctgtatcatctaagtctacggatacttatacaatttttcttcagagaatataccaacaatcgcccaactga  
aaaccgcaaagctactcttgaatctcgcttccatcgcttataccaatgcactaggtgaatattathtaagtcatttgaacagcagaacatctat  
gcatcaaaaataagcacagtgcttaaatcgggagcgacagttttcgctgccaattacgaaaatcgatacgcactcttacaactctacaaggct  
gatccaacgtcagttagaacattacctttctacaggctccaacaatctcaaaaaactaccagagatacgcctatgcttatacggcaacatttct  
atacaagacgatgcaacgctatcaaaaacttatgtggacgctgctgtatcataacttggttcctatacttaacccttctacttttcagcaagaacata  
agccagctcaaccaatctcagaatctacatcaccacaagtgaccccatatacttacctcgagtccaagtgctcttctgatcaacaagccctag  
atgacttggctctttgtaatgtctaactatgactatgtatcaatgagcgcactttacggctgctgcttattgctacccccttgatataccccatataca  
atacatatataatattatgtaaaagcaataaaatgaatcttctggatcacacaataatataagaaccaacccctatgagaatcagaagtca  
tactcaggttgctccttgcaattatataggatcaacaagaaaagtcataatctgaaatcaaaaatgccatctacatacttaaattttcaaaaa  
cccattatattccatattattatacatagtaaatgaaaagctcatgtctcatgagattcaataacgttaccagaacggtttttaaatcgcaaaa  
cataactttctacaaccagattcaattaaatgataaaacatcagcatctattctttctggtttgagattcaatttaatagaagaaccaagg  
atttaccaccagtgcttggcagcagcttattgtgagacatgataccacgggaggtggcaagacaatgataccaactgacgagagggcaa  
caggttggtagccacttctcaatctctgatcttgatgttgtagcgggggaaataacaccacacttggtagacacggttcaattggataaca  
atcttccagaacgatggatcaatctcctcaaatctgcaatgtaacatgcttttgataactgtcaagaatttgacaataaccttagaggacg  
gacgaataagcactgacgacgtccgagcgttcagcgttaacgatgttggtaagcagtcagaaagaacggattgacggaccattttgttttct  
aatgaaagcgttagatttctcttgagtgcttgtttaaagattcaagaaaaggttctagtattgagtagcattagctcagtgagaactaatgatgtt  
caataaccatacgtttcatcttctcttataaaatcatactattgttaagatttttttttcagatgttcagaaagccgggtgatggcagaaa  
acttacaccctgtcgaatagagtggttcttttcaagaacagtcactaaaccctaccctaaagccatgaattcgtactttcatatttacaactg  
gatattggcattgacaaatccaagaaaaatataatgaaataaaacaaaaataataatcaaatgaataacattaatctgtaggtttatca  
aagtacaatgatctagcaggggttttactcgtatcaacaggtgtcatgtttattttacttttagcatttttagtgcctaaaccaacactggcaata  
ggctgtaggctcaaatgattcatgggagtggttactggaaggtttcctagggatcgattccttgagtaggggtcaggcaatggagtgggctct  
tttgaaaagtcgggtattatcgggtgatagaatggctcttcttctgttgcggtcctgtaatcaggacgttcgatttctcgaatgcgattcatgac  
ccctcagcagcagtaactaaggagctattctttaagttctttgatgtaaaaagattgagttaaatgcttcagtacatggcccagctattaat  
tctctcgcacaagacacagataagagatgatttcaaatatactgtagaagaatctcttcttctcagtaagctcgggcaaatctctgttaatt  
cccttggggccttgccaacgtgccagagtaagagcaatctcaaaaagttatcaataaattcatatgtatataatcatacctttttgtttagg  
tggctactaagttgttctaatcgctttcttctttttgttttgagctttgcaattggttgaaactgttcttggcacaacttatcagggacaaactg  
agagcagtagaagtttcatccaataagcagatacccgtcttggtaggaaactccaagtagcaatttgcctgtgctggaacaaagcgc  
ttcgtgaatgtaatacaaacgacttttcgagaagcaattgtgaacgccttctgaaaggtcgcgcattgttaaagtttagcagcctcatca  
acattcggcaattcaataatggcataaccacaaaacgaatcatcttctttgccaatcatgaataaccttggacattgcattctagtttctat  
gccttttagtagcgaaggtcatttaacaacgatccaagttcttaataagaggtaaaaagtaggtatcgcacacatcgttacttccatttctt  
ctgtattatcgacattagatcgtaaagtttacttgaagcaggatctcgaaggaatagttcaatgaatcacactacatttggtagtaatacc  
taaaaataataaataagttgtaatacattttcacatttccatccgtcaatctcctcgcagcttctcgtgagtagcggacactaacgtctctatcatcg  
atatgaattgacgaaaagtatttccatccactgttccgaagcagtttaaggatacaaattttacaagctaaagcacttcgattcacgagtaact  
tatcacgtattagaacgatgctgcaatatctccgacgttctcacttacttctgaaacctcaatagagggttaagcgtatgaaatcgaaaa  
ttctagtgtcgtacatgttctcattgttgtgggagccagctcctgcaaaattttctgattggcactccgcaaacctggagtaaagttgga  
tttggaaatcgttctcgtctgttttcttattatcatcgtttttatcgttaattgctcctgaaaggtatttctctctggtttagaataatcccttga  
ttcgaaacagctgtttcatcgtcctatttttcttcttatgctcatctttttacaaaatccatataatagaatgaaatgaaaaataataactaat  
ttgtgaataaaaatgggttgctatttcttctgttaaacacttcaagttttctatcgggttggcaatataactttggcaagcgtgctgcataagt  
atactactattactcataagttataattaagcactaataagtaaacctgaataatctttaaattaattgaggatggaacactgaaattatgcaact  
accaactacaaccacttggttaaaccagctcaacgcaacgctataaatccattgtctgtaaaatatcaaaaaagtagaaacatattaccata  
ccatctactattcagacctttcaccttttctatagtgatgtaaaagtagtataaaagagatccaacgtgtgcatcacatagaacaaatacactag  
taaatttagggaatcatatattatagaataactagacgtttttaccaacaaaaccataattttatgagtagatccacgaacgctagaaccccta  
ccatccttgggagcagcagtagcggtaaggttcttcaacatcaattgaagaaccaattcaaccttgagttggctgggacatcaggaatgta  
atggtagcaagtaaggtcttgggacagcaatcgttccttgaactcctcaggctcctccttctcgtcagaaagtcctccttctatcaaaagg  
ttcggattcaaccttagtaacctgactgagcgtcagcctcaaaaacaggatataagcaccaccttcttaggggtaacaacctcaacaattt  
acgggtgggcaaggcagtcattgtaaaagcggtaacaaagttttcacccctgtaataccaataggagcagtaagatgaggagcttcaacg

atggcgggctccatagaagaagcgatatcagaaggtcaaaagtgaccaaccaagaagcttgaacaccagaaccaatagcagtgagttcaga  
agcttcaaaaggcaagggttaacagagctagtgagcgatagcagctgttcaggggaagatcccttcattaagaagtcaactgggggta  
ttggaagcaccaccagccaagatcacttcagtaacatcgaaaggctcaaattagctttcttaacagcttctcaacaagctgagacatacggttc  
aaaggagcagcgggcgagttcaaaaagggcggttaagggtagcatggaaatcaacgccttcagcaagagaatcaaccgagctgaggc  
attggtattgtgctgagaacacgcttgtaagtccattgtccctgagctttgcaacagaacgagcattttgaggggatcaattcattttctt  
ttcaaaactccttagcaaaatattgacaaaacatcagtcattgttcaccgccaagattttcatcgtgagcagtagataggatggcatcatacca  
cccttaatagaacaacggaaactccgagcgattagcaccaaaagttggcaacgacaacagctcttatcgacaagaacggactcagaatacatg  
agtgaagaagaatagcagcagggtcatgaattaattgaaggatggggaggccagcttgggcagcagcagcttcaaagccttctttgatttc  
agtgaagtaaacagggacggacataacacaacatcgacctaacacccaaaaagcttgggcagattcacgaagacgttgcaagtgccgagc  
actggcttctgagcagtaacgatctttcctttggttagattcctcctccttggacggtagccttaagcccactgtccctctacgttaatagg  
agtagctgaataatggcagtggtggttgaacttctgatgagacttgccaagcaaatcacggaagtagttacggaattgtcggcattgcgaac  
aagttggccacgagcttgaacacatggatttctgggtcaccttggttaagacaaaatggaaggaattggcggttccttcttattgcccataaca  
tcagctttccatcctaaaagcataagttagtagtactctattctatgccaagaaaagaagggtctgtcaacatcagaaaaagtaatgtctgtaaagtt  
gtaacaggccagttttctgtaaaataattacatactctgttaaaagagatagaactatgttggttccaaaagaaataccaatgacagctcttat  
tcttcggattctgccattttgaaaaatttgggtggatggaagaaggatagttcaatacccaaatctacaccaactcagtggtacttaccactaaa  
aatttggcttactattactccttaaaatttagtagtttactttaacaattagtagtacttttattttttgagctactaaatgttccattggaat  
aatttcaaaagaaacgattgtttgcaaggattcctgtgacagtcggtaatgaaactgtattatcatgaataaatagatgtttgatgcatgtaa  
tggaaaaaacatgcaaaagattgctaaaactgaacatcaattcatgtttctgctctgcttataagatgttgcatagcaacatcatggctaaaaac  
atatttactaaatgaaaatacagaagtgctatactgattgttctttggatgcttaataagaaactattgcaaaaaatcgtaagctagatt  
tgcggttgaacaaaactttcatttattatatagaagatacaaaaaagacttaataaaatgtccagttataaaaaattttccggaaaacta  
gaaacgagggttgaacagacaatttctgcttaagtactattagaacccgggtggttattagtagtattcattaacagcattggaattagttc  
gttttattacaagagtaaaagtaatccgattgtcgtactgtcaccacatgccaacattaatgatgaggatggaattcaggcaacttagtcca  
ccaagttcgattgctcaaaaatcgagagctttcacggaacgtattgatattttaccatcagtagtccatacctcacatattgattcgacgatcc  
agtggaacacagggcagatggctatgtacgcttagagacgtcaaatcattgaaatgagcaggaattgtcaataagctatgattagatcgaatat  
cccagttttacttaccatcaacactagctgaaatcaattctcattcccgaagattgcaatttcaaattcacaattctgaacatgctctttcc  
aaacgtctgcatagatttctgctggttaactgttatcataaaccttaatgcacatcagtaaagcctgcaactataacattacatccaacaag  
atcactagtaagactagtaatgccattactcttctgctgtagactagaatgacaaagttccttggatgctccaaaattcgtataacggaacg  
tctccagctacgaggagatgaccacaattttgttgcaatttagtaaaaacggcatcacgatctccaaataaagctccaagtgattccaa  
gaagttaccagttcgacatcttggatcatagttgctgataaagacgaacgacacccctcagaattaccggtcattaacagagcaatgtcatcctc  
tttaataactgcataccataacatcacttctcaaattcggatcagttttgaaagcattaagacacttagaacgccccagctccagactgaa  
agtgtgttacttaacgatactaattgatcctcaaattgatgaaaaatagtttcttggagtgaaacattgtttatggacgaaactgtggttcc  
aatggttattccagatagttcagcgagaggtcgtgttgataaattagctttcattcctatttctcctcaaagacgttgattgtaacagatgctac  
caggttcgtcttattaggtctcatctggggctctgtaaaatatttacgagaccagtcaaagaaatgacttgtaatggcatatcgagttcaga  
ctgatattccatactatataaagaaggagggaaggaaacttagcatctgtcaaccgagaagctccataatcgctcgttcttctccagtaag  
cgaagatattcagaggctttatcattggcagtaagcttaaggccagctcctttaaagatttctgtaaaagagaatgatctggcagcatttctt  
ctcgggatatcgagaagcagaaaaagatcgcgagtcaccgtcaagcgaactatcttcagtaattgtatcctgagccgaaacagggttccgaag  
aacggcaaacctttagaacgaaagcagaaaattcgtcttaagtgaattgagaatactttggtacacataattacaactgctccgcagc  
catagctacttccacgcttgatcagctgacaaaactcaaaatagcctgccaacagcttcaaatatagttgaaacactaataggggtatgtgtt  
cttcttgggttaggaaaatgctgcttcataggcaacgacaatgaatcttctttagcaaaactcaaaacgcaaaaatcgttaagttct  
cgacgtaccataggagacgcatctgacattgccacaagcgagataaggcgatgtacgtttcgatagctataacttctcagtttttggggaaa  
ccaagaacgtagtgaaagctactaaagctgaagcagcaactccggaacaggatccgaaacaatctctgcaagcttcatgtgagcattatcgc  
gtatagctgaccattttgcttcagaataattatcccacagctgtgcatgatacaagacaagcccactgtctaagcaatgaatcggaactattcagat  
gactcaaaatgtgataagactgaggccaagacaagccaattgtcctgagggaatcctcgcaaaaaatgcttaaaatgaatgcacacat  
agcacggtgttcgaaatattactagaaggaaaaattgagaatttgggtcaaaattgtacgaaataacatagccattatcctcagtaagtc  
tgcttggcatgagtcacacggtaagatttctgccaataaataactaaaacaggttttagttctatagcaggtgactgagtaatttcaaac  
gtaaggaaaaatccaatggatagactaaatcgacggccaaacccaaggtcaagaaatttagataacagaattagactcgaagacgatg  
tacctcgaaagtaaaacttgaatactagtggaactgatctggtggcttgcgagttattaagccttgagatagccaaactcgaagctgtcaa  
ttgttcgtaaaagaacatggaatgtttatattcgtaggaactccttactctcagcttcaagcatatctggaagctgggataaacagttgtcaatg

gcaaggtccaagaattccacattgggtgatcatgagttgaggcaatggaggactagactgtggatgacatgaatgaccaacatgatacgtt  
cggctaaaagaaagttacggaaaagggcagctaccatgagatcctgacggaaaagcttctgaaaaaggtgttggggaatacgttccaggctat  
tgtatctgtgatagctgtgaaaatccaattcaattcaccaagcggagtgccgcatcttgaagcgaccagggtatctcaaaagcatattcaaat  
aatttgctgggaaacggatattggagtacataccatcgcacagaaatccaatagggaagtcaaacaggaggtgaaaagatcagcaggcaga  
tcaggattcataggaagcgtttcctttggaccacatgccgaagctgtatactggtagtatgggatggcatagccagatattgggattttgtag  
caagacgaaaagcctctctctctctctctctcagcaaatcgattaaagttagcaacgatattccagcagcactacaatcatagacataaatacag  
ggtgcaccagccatgtctgttaggtcatacaagacactggaatataattgagtatagtttttataaacacccatatttcgcgagaagaagtaggc  
ataggaactccatggccattataatgaaacaagatgcgctctcttttagcatttcggcgttgcaatacaagctttttacttctcaattgccgg  
atcaagatagtgacggatctgtgacgatactgagcgtttcactgctgttgcaaatctttcctatagcttctaagcttttagaagcaggtaaag  
aaaatggatcaaccaacactcgtatttagcacaagggtaggttaattatatacaggaggatctaccctatgtttaagcacactaacaagctg  
cagatattgtttcagcctctcgcgatcctccagtcagtatagtttccgtggctctgagctttttactgatcaccgctgatccggtttatcagt  
ataatacatataaaacactgttctagcatattaatataattctgattattgtattcttctcaaacccatgcctgggttaggaaatgcaactcaa  
aacatcattagctgaactgttctatcccaccattctctgcatataaattactagctctgtataacatcactccctgtctcattcgtattatagct  
taaacagacatagggctctagagctcgtggaatgctcgtgtttcggtcattcatatcgtgcaaacagattttaattcatacaatcatttcaa  
tctgttcaaagactcctatttccaatcttttaaaggttttaaggaaaatacgttcgtaattagtaaaggttataatggattctgtaaaagcaact  
gggttttagccgatcattgttaggtataaaatatttagtgaactctttgtaataataaagccgctgtttttgtgctgttttagtgggtg  
caaggccgatctttatctgagctggatcacgacgtttaggacagttactattaccctcaacaatacacagcttaggcaaaatagaaggaa  
gtaactgtctactttggtagacgagagggaaactctgtaaaaatgagttattcaaaaagatgaagataacggtaagtacaaggggagata  
cgatgtgtgtaattgtctactagatgagtaaatctccaatataaatcagggttctgtaacgcaagatgcgagagcattccacaaatctcaa  
tctcacctggaaaagccgaatgttcttgaagattgcatatctactgtatactggagatcgattctgagaagcaagcaactgagctcttttt  
ggcatcacgaagcttttcagcacaaggatcctagcttagacaattgtgtatattataaaggaattgtctcggttgcgaggtgattgattat  
gattactagtagtattatgaaagacactgctactggaagtgaagtggtttatcgtccgaatgctattcgttactcgttcgagtgattgacgcaac  
actgtacctgctatcgagcgtatccttacaactgccgtgttaccagtttccgctgttctagtgctgctgttgggttccgcttaccactgtatccg  
gtagccaaagatgtgggttccggtggagtaacaaggctcaagatgctacgacttccatattgttgtagaaaggttgcgaatccgctttttg  
ctacttcttaggtatatacgccttctccagtggtatttcaatatcatgacttgcctttttgatagaatcagacagtcagatcatatcgctgtctt  
aaaaatattcgtgatattgcttgcgaagtgtctggacttcaaattctcatgcttctgcatgacgtccgctatgctgctagctttaggacaat  
cctgatatgcgtaagatatggttctctgttccatagctgggtgaaaggtaaaggtgataggtcaattggaaattgccggaacatggttgcct  
taaagacccttgacgatgaggacatacgtcccgtagctgtatataacatatttcttacctctcatcgctcgcgctgtttttctgagtcggt  
ctttaaagattaggttagcactgctcctcatcttctactcttgaatcctatgattgaaagtctaatacactgatgcgaaccgctccatagcaact  
atgctattaccactttacttaagactggaatgaagaatctgttaccgtcttattgttcaaatagctaaattatgtctgaaattcccgataactt  
aagattatcgttgtgatccattcgttctttagctgaaatccctcgtaaacaggaggcaatgttatcttcttagcaacattcttagtgacgag  
ggtggttacgagttaaacgtgctgctattgatgctattttcgatatgatcaaatatcttgaatctaaggagaaggcacttgcaactctgtg  
agtttattgaagactgtgagatcctaagattgagttcgatcctgtgtatattaggtgaagaaggacctagggctgcagaaccgactagattat  
tcggtacatatataatagaatcatgcttgaatgcaatgtcgttctgagctgttagtgctcacaagtttggtttaatgcaaggacgac  
tttgaagcatagtgtaagactcattcttccagatgcttgatgatgctgatgacgaagtgcgcatcgctgctttcagcgttaaagtttaga  
tgacatggattccttctacttttgcgaatctaataaagttccttctatcccagcattagaacgtagcttgttcttactgttactggtgacaaatt  
gatcaactttcgacattgaggccgttctatgttactcaggaagaattgatgctgagaatctaaatcaagaaggcgtctactgagattgct  
catattgcaccgctcctactgtttagagagtgccgaagaggttgtaaaagccgaaaacgaatttaaatctgttttgaaattcaattcctgagttca  
gttctttcggctcgggtttgaaatcgttcttcttattgaggttacggaacgcgaaactgagatgtggttaaggccattaagcatatattcgaag  
catattgtcattcaggttaagttgattgatcttctaatgtgaaatattttactgacagattatagtagcaactccataatacacttacggaggttta  
ttggagaatgtcacggttggtgacacacatctaataaagttccttctatcccagcattagaacgtagcttgttcttactgttactggtgacaaatt  
atctacgttagttctcgtatgaaggttctgaattgttctgactcctacaattattgaaaatgtattacgatttacttctaaagaattgatcctcata  
cgggcaagcagaagaagaaggctacgatgatgaatacaatcagataattgtggcctaagtaggggacttttgcgttcttccacagttcca  
actttgatgaaatctgggagcaactggccatgaaagttccggtttattctcttagtgaattgagcttctcagtaacgcatgttctcactgggtg  
gaacttttgcaatgcaactgtggacgaaacggatcatgtaacagacgaagaacctttgcatgtactgaaattatgagggtgagttttccgga  
ggaaggtgctttagttataaaaatgattcgtgcgaatggcacagaaggtgtcaccattaaattaatacaagggtgaaaacgagaaagctg  
taaaaagtttccaaccgctttgaaagtttaacaatggaacaagttacttcatccaacgagaaacgaattcatgaaagtagatttaattcaa  
agatggaaccgacaatgctatgtataagtggaagataatagaacaataaataattatattaggcagacgagaatgaatgaattttgaaag



agtatcatattagtagcttaattcgacaaggaattcactgttagacactgtatcaagtattaaaaattagttgaatttttaaccaaacaaaacga  
acaagctgtaatgaattatgtgtaaaaaaagtaataaaaaggagtagcatggatgatactcgtggatttgaagcattaaaaataaaatagttt  
caacatcaaacataacggaatatttcaaagaaaaagaaataacttaactcatgtaatgcaatgctatgcaatgactaaacgaaaaggaaa  
ttaggaacgaatgaatatcgggtgctaggacataagcaagagtgctcactcggaagggaaccagcgaaggcagatagcattacaagtag  
ggcaggtatgtctgtaatccacaaccatttagaaatgcaattcgggtggaattcatgcttacaaggcaagcaataactttatcgccggttaa  
aagcttcaaggcaaatgacgattcgacccataggcagcagccgagaagattcatccattagaggaaccgattctctatctgggatcatttt  
caatgtcttctcgtcctcgtagaagccttctcgagaatcgtccttgacggtaagtttggataaattcttggttttagaacgactttgtaagta  
ggatgacacgacgaatagcaagtgttgacagttgcaagcattataatggaaggagaaaaacatagaaggaaggccaaaacatgtcactg  
agttcctcggtttggcatagactacgagagagcggttttccggaatagagtatacagaatacagaatgttaaaggaagcggttagaataaata  
gcatggaattgagacctttgagcttcttctcctgctcaccatgtattgtagatgtaagaagattgtttctgttatcacctactacaattcctt  
atatcctaaacgttgagcatgaagggcttttcaaagaatgtacacttccctcgttgaaccataagaaagcagagcgtgtcgtcatcagtatc  
ctgttctgtttttcacgaagtgcagaccgttcttctgatttttctaatagtcttcttctcatcaaccgataaagacatacttaattgctcatgtt  
catctgtacgtcagagcagcctgtcatatcttctggaaattggagggttaaggagagttgaatcttcgtcgtgtaagagctattagttaacctta  
ccgaaactagcctgccttgccaaaagtgtcatttctgtcgtggaagttgcagagcaacatctgtgctagcagaaatcgtttgggagagaagat  
gtgtctaaaaatccaaaatcaagagcaatgacttcaagcaatagacataacttatggaagctaattgacataatataatggaataatagaca  
tatcgtaaattgctagagaatgcttgcaaaagtcaagagacaggcagcggtggagttgaattatgaagcaaacatcatctaaagaaaaata  
cctcttactatgattctcgttttaaatggaatatgataaagacgatgatggttgaactgtcactatcaaaagagaaaaacaagagcagaaagg  
cgctttaaacaacttttttatagaaactccttaatttagtaggatgcagccttgtttaaaggacttccatcaccattcaagcatgacgtata  
aaataaacaatcaatcgggcacaaaatctcgtcttcaagctggaagcgttctcagtagagcatgatttagaacagggaaaaagggtg  
atccatcaaatgtactctgtaccagaacatagatattagcagagcgtctataaacaatgcattaacgacctttagtgaaagcttctcgtgt  
cgttatacaaaaaataaaagtgaaaaagtattgacgaaggtgggttcgaaccacgcccacaaacgtagactagcagttgcttccactgaa  
gctagcgcctagaccactcggccactcgccttgagttgatagtaaccaaagtaagactcttatgactagtccaaaagcaaggagagaaca  
gtttatcttagcttatttctccttcttcttaataaacaaggaaaaaatgcatgcaagaatcgttgcaagctccattgtaaaattatct  
atacacaagaagaaatatttttttgggaaatagttcttgcgttccatcatgttgttatggtaacaattttgaatgaatgacatttttag  
ttattgaaccatttattttcaaggattgcttttctaattctgttggtttagcgccttgttattattattttggttttttttttttttttttgt  
ttgaagtttgattattatgtcggatcgtctcctgtaataaagtcctccattgattcaaggaaaattgaaaagtactgactaaatcttt  
ctatgtgaaagagttcatcaattgattctattttagtgcttctgcatgaattggaattaactgtatcacaatgtgacgatttgagaacgatggcgt  
ccattgcttgcctcaatctcaactcagttttcagtcagccttcagatctttgaattatgttcaaatatattgactacctagctattctgattttt  
ttctctcaaaaaagacgaaagatcttaataaaggaactgagcattacaaatgggtgggttttctgactaccaacagttctctcgatgggtg  
agttggttatcacaccggctgtaattcaagataccgggtgctgtagttcgaatcggctcgagagatnnnnnnnnnnnnnnnnnnnnnn  
nnnnnnnnnnnnnnnnnnnnnnnnnnnnnnnnnnnnnnnnnnnnnnnnnnnnnnnnnnnnnnnnnnnnnnnnnnnnnnnnnnnn  
nngttttttttttgttgaagtttgattttatgtcggatcgtctcctgtaataaagtcctccattgattcaaggaaaattgaaaagt  
actgactaaatctttctatgtgaaagagttcatcaattgattctattttagtgcttctgcatgaattggaattaactgtatcacaatgtgacgatt  
gagaacgatggcgtccattgccttgccaatctcaactcagttttcagtcagccttcagatctttgaaattatgttcaaatatattgactacctag  
ctattctgatttttttctctcaaaaaagacgaaagatcttaataaaggaactgagcattacaaatgggtgggttttctgactaccaacag  
ttctctcgatgggtgtagttggttatcacaccggctgtaattgtaagataccgggtgctgtagttcgaatcggctcgagagatattttgtact  
tttacttacgaagtactcgttaacttaattgttttaaaagcaaatgatctctacgggctttataaaagctacatcttctcttgatgccttt  
tcatgactccttaccgaattacatttaatttatttcatcatgtaattccccaggacaggaacaataacttcatagcaatcagagttacta  
taacttatttacaataaacttgaaaaaataagaaaaataaaaagatagctagacaatgagaataaacagttttataaataaattcgttttcaaa  
gatctatcagtgaaacattgagggaatgcagagaaaaagtgcttcttgatgaaaccgttacattgacagctcctattatcgaagtcgaattaa  
ttccattaaaaataaaaaagagaaaaagaataagaaatgatcctcaggaaaaagagttaccatacgaagtgcgaatgtatactcctaagaatg  
aataaatctcttccaagggacaaaattataaatgcatgacaagaaataactcagacacttgcgtaacctgctcagcaggaggtgattggt  
aaacagccatactatacaaaaggtagtccatgatttactaataattatgaaaccataataaaattacataccactgcgttactcttttca  
attccgcctaatggcagcctgatccaatggtttgataagttcgaaagacaaagaagctcagaattaactcatgacagcaccctaatatcg  
aattctccacaatagttggggcagaaaaaccgtacataacgtcctctataaaaaattcataaccttcaactaccatagcgcacgaca  
aattaaatcgaatcatgccttgccaaaattgccgaattacattttgttaaaaacaaacgaaacgcctgttattatctccaatcattttcta  
ggtctgcagggtcagaccatagcaagtattcaataaaccataatcaggaacatcagtgccgagtgatctccttaattgcatccatagaactt  
aacgcaggagacaggcctcatggacacaaaaatcttgccagcgtactcgggaagcaataggtaggcaattgaagggttaataaacgtctcc

agattttaatattgcaacgtcgtttacattcatcgtagaatccgtaaacacgagtaatattagcacattcatgattccacgaaggagaaagaat  
tttcgggatatcgaatcttataataaaaaaggagtaaaatcgtttccagacttggttaccacgatcaacgtagtcaccaaggaataaatagttag  
agctcggaggaaatccacacatttcaataatcgaattaagctgaatactgtccatggacatccaacgatttaacaggtggcatgagttcta  
gaaaagtgggtgtgaaaggaaaatctcctcagaccgtgcaataactaacgatttcagcgttttaaggcagacactttgtactctttcgag  
agtaccggcatgaaatgagcgtgaaatcatttcgtccacatttaactccaatgcatcaggatcatctgggtcatgcccgataaagcagaat  
tcggtattacaacgggcccgtggatcgtagtgaaagtaaccaggagtggtgcccgatgggtccgtaattgtatcatgattcgagtcattagacc  
caggagaagccattgaagaaggcgggtgggtgaaagagaccgattgcttgacatgcccctggggctaagattactgaaggcgaagtaacctgt  
aggcattgagtagagctcattccagcagcggcaattcttctggcttgcgatgaagttggagctgaaccagaagtagctagaatgcctgg  
cgatggcggaggaggaagactaggcgggtttctgaaacttatggcggctgttgggtgatcagtagacgttcttcgatcatgattgaatcttta  
tctttccgaaagctgctttagagatttgaaggatcgaattgaaccttgcgtatctgatcactaaaggaagggtaggaatccaatcggtgatca  
ctatgtttactactccttgcctcattgcgtctcaatccgttcttctaaagtaagtttcaataattctttttaaaaacctttaattcacgttatta  
attgcttcttgcatttagtgcataaaatccgcttttcttctctatattgcttccaattctatttctgatctgttcgacagccctcaactgttc  
acttctgtatatttgtactaaaaatcgtttcttctgtttttatcccgataaatctgcaattgtatattctgtaggttgggtgaaaagcga  
gtttccatggaagggaatttcgagccaggtttacagacgcaatcgatgagaaaaaatggaaccagcagaattcgaaccggtaattagttta  
acgatgtggaagcacaggtcggaataacgataagaatattgaaaaatattgcaaaaacattcttgctaaataatcaatatagatagaaaag  
taactcatttatacaatacaacataatctaacattctgtcccattcctcactgtgtccaaggcttagtttctgtgcttattcctttctttt  
ttattccattctgatttgcataaactcgaatgcttcttagatgcaggttctacttccatctgtccaagattcccgtggaaaaactagaga  
cctcaagactgtgacttgtgaagcccttgcgaatttcaaacgaagtattgcaacaccataaaacaataacctcaagtatgtgatcataagca  
ctttacctatcagcttgatgaatcaattacgacgaacaagtggaagagatccctctttagaagcttactcgcgagatgactcttgcgctgca  
agctagacaagaaactcatctacctaataagtatatcgtcttaccattaggttagcctgccgaactatcccgggtgcatggaataccgatggt  
ttacgataaacctgatgacttgcataaacttcaaaaaaccgtattgagctgttccaggcttcaatcctgaagctttaaagcaaatcg  
acttttggcattcgaagcttccgcatattaccgaagcttagccttgcgaagctttggcagattacaagagctggaacaagcgcgtgctggat  
tacttgacttgccttagatagaaagcttgaccgctgaaacagatttctactgcttggtagatgctaattctcaataatttgggggtgtggcgt  
taattgctgccacatcagtttactcccacatcagaatgcctcactgaacttttaaatcgcatgctgataagactatcatgctttatcctgacg  
gccgtggttccctaatccttataacttcccccaatttgaacgaagcctgctccatctcccaagaatgggctgagctcttttgagtactta  
ccctgaacagtggaacattgtaataggtggtgtgtaaacgatatccgcatgttgatcaattaaggcttagatataatagactcatat  
ttgtttacatgcctccaatttctctactgatttctaaagaaccttgaatgcaatgcttaccaaaacatttttataattcctaaaacct  
tttatccctaatttataatgttataatacatctatttcaattccttatatgactttaattgtcaatacggaaaagccaaaattttagagaccatac  
aatatgactgtattcaaaaatagtttatttgggtgcttcagtggtgaaataaccttaccagccttgtgacagctctgggagcaacagccttgcg  
gagaggctctgtagtccattcaggaccattggtagattaagagcttctcatattgttctcgagattcaaattggaatggaacggcatcagcag  
taagcttagctgatttcttattgcttttctgtaataataacatgctgtaatttgcatttctgcttggaggatccagccctgcgattttcttaaca  
gcttccggttattcttcttctgcttgcctgactccggctcctgccaagaacccaaccgggtaattgttggcttctcttttgagcatcctcgtaatcc  
aatcctctttatcctttcaaatccgcaactacatcgtctccgcaaaagccctagcaaccaattccttggatagcacttgccttctgtag  
acttcaatgtaggtaccttctgactcttggctgattcacttgaattgacgtctcgttgaatattgtctggctggatttcagggtcatgag  
tagttctgtaatgatttacctatcactgttctctgtgagcaagttatcagctttgagctatccttataactctgctaaggtagatttccgttg  
acgtggagcttgaacatgatttcttgaatcatctgataccaacttccactcttattatctttttgttattattcttcttcttcttcttctgctct  
ttccagcatcattatttcttcttgggtgtggacaagaaaggattctacgttccgatcggatttcttcaatgcttcttcttcttcttcttcttcttct  
atcagcagactgcattatctcactagaactccagaacttctgcttctaccgatcagaagcattgccatcaggatatttagccatttctgcttca  
aaggcttcatatcgttttacttggcagcttcttctttagaagcatctgcataaatttataccagaacacccttatttggcttcttctatct  
cttctacgttgcataaggcagctgaaacatcgtcaggtgttttaaatcgtcatcagaataatactcagcagcaacaccgtcagcatccgtttgacc  
actaatcgtttctgtaattctcccttttctgacttgcctcaaaaactgctccttcttccatgattgtctgcttcaagcattttctgagttcca  
agcactactatttggcgcctgctcattcttcttagcacgacttctcggctcttagacgctcagctccaaatcctcttccgtccttggcaac  
aaagatttcttcttcttcttcaaatgttgcgatgcttacttttaattttgagacagtttagcttctgctcctcctggaacatgagtt  
ctctataaacgcaaccgtcgagttcttctcagctacttctcaactgagagttatttaaagccaattcttctgcttttcttcttcttcttcttctt  
aggccagctcaacgagagctgatccagcttctctcgttttgggttccaggagataactggaagccaatccaggtctacttgggtcaggacgt  
acactctgttcatggggaacacaagctgatccgcttcttatttctgaaacaattggcttccacttcaaggcttcttcttggattgttcataggca  
gcttgcctctaaacgatcatgaataggtttgccaatggagcatttaattcagcgtgctacagcggatgactactaactaaaggcttcaaag  
aagattcaacctattatcaactgaacagattccaaaagatcagaagtcgatttttcatcatcatttcaaccaaatgattcagattcacg

attggattcagtaggattatgcttcaaacgtttttctcagtggttttctttatcttcatcttctcgaagacgcttcagcctttcgcttatcatttaa  
ggaatggataataattcttcaagttatccaacttagcatcattttcttctcgtcgttactcttcatcttcagagctgaggatcacttcttcttaa  
ttttcatcttattttcttcttcttctgattcatcttgaagaaaaggaatcatcgcttcaataattccatcagtatgttgaatgatgcttcttag  
attatcttggatgattttcttcttcttcttactagacctgactggctaaaacccatctaggtcgactaattcgtttcatcaatactagct  
gcttcatcatcttctcgttctcgactgctcattcagatcctcattttctgccaaggaatcttctgttcttttggaggccgattgaataatcttttc  
ttaggaacagatccagcctaggtgtttagtaactacacaacaagatgattagaaatataacataccttagacgcgctgaaagaccaa  
tcagcaaacttttctcgtcctcgtcaaatgcttctcgtcactgtcaattttctgctcgtcgtgaattcacaccaacatggatccggagtcgtttt  
cgtcgtccaattcatctcaatgaatgaatcctcatcctttcatcgttaggagtgcaaaatctttctgaagcttttcttttctattgtcaaaa  
ataggctgagattaccggttttgattttcttctcctcgcctaggtgttggtagtgaagaattcaacaacttctgaatgaacataaagtagaaa  
catcaattctttgtatgacagtaaaataatatttttaaatattcattatggataaataagtactgtaattgacttttagagttgcacaaact  
actaccgccaggtataaataattatatacctaaatctttaggaattcatagatcttttagtaacaacttagaagagtaactgattttatata  
atctagcctgtaagtaataattagattttgcacaaagtcaattcatctgcttgataaacgaaggaataatgatagctattataacgcttctcc  
aaaaagaaaaaactttgatgtactcataaacatccatcaataatgaagctataacaagataaacttttaagttgaagttgaaattcata  
attaaaaatttaacaaatcatactgctcattcgtcgttgttggtagcaactcaggctttttataaaagccgtattcatctccattaagaaa  
ggcattcatcattgacataaattcaccgcataaggatttctgaataaacataatcagatcaatctgattaacaattgcatatgcaatcgtacaac  
cgacagcaaaataaggtaactcatattttaacatctcataactattctcgtatgaccttgagattgggtatcgtgaaaacgggaggaaga  
atacatcgccgcttttagtaaaaaagcggctactagaggggaaggaacgattgaggtaaagcattaccagttgagtgctttgaagacata  
tagagaacggcaattgatcagcaacaacttatgatcaaacaccgactcttctaataatgcatacatcattcttcatcgagggttgaag  
gttgtcatcaatgaattaagtaaatccaacaacgataactcggtttcacagagagactgatattatccataggccattttccactaggggaaggt  
catagcttaccataggaatcttcttctcagagcttgaactgctgagtagatttaatatcttactttggatttctgtgcaatagctcatgatcaac  
tctcgtgaaaaattgaaatctcgaatgaagtgtccgagttcaataagggtatttccgatgcttttgaatagcatactagctgtaaggggtt  
tcggcaagaaggaataaaagccgcgtaattccagccataacgacaagaatctcgcataagcaacatccaaccgactccgaacgta  
caattccaggctcatgaaaagctttcaagagtagtaaacagtaagagcaactgtcactgagaaaataactgacggcattgggggtcaaaat  
aagatgaaccctaacgaacatgacaaaagggagaacaactgcacaaaccagctaacccgtaagcgttcttaggcatgtccatcaactgta  
taccatagaccatacaacaacagtgccgaaaaatgtcggataactctcatgaggtatccataaacagatcagcagataacgttgaagct  
catcgtagccagaatcacagccataaacctctattgtaataataccaacgagcactacttcaacaaatgagggatcgtacaaatgacagcca  
gcgctcaacttttaaacaaaaatattcatcggcctgaatatagatttgaaaaaacgattgaatgtaaacctatgacatgatacaaatggatg  
gacggtccgactcgtgattttctggttggctgctcactgcttcatatccttctcactgcttccacatcatcatggaaatcatcatgaccagaaagtt  
gagagtacaaattggctcgtaaagtctcaagccaccacaaacgctcggcaggacgcttcttctcagatcgataactgtatttaaatctgca  
aaacgccccgaacggcctgcatcaaatgagactcgaataatataaccagaaacagtgatctaaagaatgcataagaaactctgtatctgca  
ttttgaaataatggctcgtaaagtttccgacttcaaaacacttctcctttcaaaatcggaagtaactcggataaatgatcatagtgtaacttcat  
aagccgaagcagaccatcactggcttcttctgattttttgaaaaaacgcttgaaccgatcgtgattaactcgttttagccaagcacttatag  
catctaaagcataaatcgtttgatcaatataatctcggatgatgtctgtaaacagacaggattgagcaagaaactggggccgattataggc  
aacctatttccaaagctaggaatgttgggcttctagcattcccaccggtttatagcttttgggttctctgtataacttccaattgctcctcgc  
aacgactccgactcggctgacttttagagcctgtgaactttgacgaccctatgatgaccgggatattaccggctctatagtttaaggcagaat  
gacgaccgtttatggctgggagaaaattaccatcgtttaaggaagttgacgacaagttgttggaccgaaagatcgaatagccgtagattatcat  
caacaggaacatttaactgactgctgctcattcggcctctcgtattccggttgaattgaaagttgacgggtgggtggggacaaaaacta  
tcactttcataagcagcccatttggcagggcagatcgatagaaggcaccgggtcccagcttagaatgcaagttgctttttagcttgcata  
tagtttctcgtcataaattgcatattgtgatcaataagtttgcaaaaataagaaaagaataaacgaagaatagtttctaaaagctttg  
caaagataccaagctcacccttcaaacgaccataagaaaattcagatccaaaaaacctcattcgacttatttctgtaataaagtttcaa  
atcagcattatccttttctaaagtagaagcgaaaaaactccagcctcggaaagtaggagaatgtgacaacatttccactgctttgcataaattt  
ctcgtattttctgtaacagtacacaactattgtacgaaaaattgcatgtttcgggaattataaagagtgcaaccgacagtaatggcggtt  
gaattgattggggataataaaaaatagaccaacagaggataaaagtaggggtacattgggtccataaattgactaactgcagcacaatgat  
tgcaaaagcgaagggaagttaaaggtttatacttatttgatgcaataaaaacggcaacagcggaaaactgaaaagagccataaatt  
gatggcaaggacggacgaaataaccctggaaaattgctcagcacaacatccctgacttcttggctaggggtactacagtgaaatccatccgc  
aatggcattctgtaaacattgttctcgaaggggagccacgagacacagcagcaagttggatgccaacacagcgaagcgaagcgaactaaat  
agcagtaaaaattggaaggcacttccataacataggagctatcggttccatagcaggtaccagcatggaagtaattacagcaaaagaaacta  
gccatacctaaaaccggttggatggttgcataatgagaagaagaaggctatccaagttgagagatgctcgaattacaggctttatcccctt

ctatttagttttggaaatccattgcatatacgaaggaccttcaggtggaagggtgttgcacggcgccaaaattgttttaacgctttttaga  
caatgttggtgattgtttggaagatctggggaagtctttttctgactgaatactccatgtccagatacagactgaggatgaagtgggcgagaa  
gaattaggaagaagaccggtcgcgagagtattcggaaggccgctgaacaaatggtcacgaaaagacaattttgtcctgttgcgggttga  
ggcggttggggaatacaaaacgagcatgtttggagaatcaggagactgcaagtgagaagatgaaggaagattaaaagaagaatggatag  
aagtcctaaaagaattgaaggatgaacctgagactcgtgatcatgatcatgaccttcggaagtgttcgacttggaggaactccgagatgaccgg  
gaggatggattatactcgagaggatactgggggaggattttgagtgcgaataggagtagaaggatcatggggatgacttgaatgttgagaat  
gtctagaatcacgagcaggcgcttgtaagcgggtgaaagggttgagtaagatttagatggaggaggaggaggaggaggaggaggaaactga  
gggagggtggcatgagagagaggagaactgacaaatggttcataacgagccggagaagggtcactagacaactgtattttggggataggagta  
gaggacggggatgagggaatctatgtaaaaaggagcttttgaatttcgcatgggattgattaaagagaataagacgcatacagaacgaaa  
aatgaaaagaaaagaagttgagaagggaacaagagcaaaattgggaacacaaacgaggtataaaaaccgtcaagaagttgaaggatta  
aaaataccaaggaaccgtttcaaaaagaaggtagaagaagttttcaagaaccaagactttagattatgcaatcaacaacgaaaagt  
attttaacaaaaaaagcactatgaaaaacaaaaattgtgtaaagggatacattccttttctgttttggagaagaatttaccagcgtgagata  
cgaatgaggcgttatacaaaacaaacagagtgaggattgtttggttttattgagcagcttccaacaagcaattgaatatacagatgaatcaa  
gaacaacaatttgcaacataaagtaaaacaaaagagtaaacgaacaagaaaagaaaaaagagaatcgtaaaaagtgt  
agattgatgtcgtagtggggtaaaaggaatggacgtatgtttatacacaacgtgagcggcagcgtgctatagaggggagcagtaagtagagat  
gaaggcggatctgacaaatcaaatatataagagaaaagagtaaaatattatataagcggcagtgatccaagacgaaaaggactgagaaa  
cgaaaggttctgctgagataaatcgaaaaagaaaagaatctttttagaagctccttaagagccgaatataagaaaaaattgaacagatag  
gcgaacgaaagtattatactggtttgtgcaaatcaatatgattaatatacacaaggaggaggattccatggtataagaaaagagtgtgtgtgt  
gggagatgccatgttaggtttcataaaaaaaaaagaatctattttatcaatgaatgggaaaaataggatgaaaagaaatagggtagaagtg  
agaggcggcgtatcctgacaattactatgagaaaaggtatataggggaaaagaacaaactaggtatcaacagaaacagaaaataattg  
taataataaaaaacaaaagctgctatgaaataggtcatccaagaccatgggtgaaatcatcctatggtgagaggaaactattcttttctt  
ggcagagacaatcctcactcgagaaatccattcctagaaaagagagaaaaagtaatcatatcaatcgacgaatgaatcaacagcgaaggtaa  
gacaactgtttagcagccatttctttccatacattgagatttaatatgattattattattaataacacttctatttctatattacttgataaact  
gttgtttctattttaggaaatcatgtgttgatgaatcatgtcagtcgaaatggaacaagaatccacgaccgaaagaacaatttaacgaatg  
catgttgacacactcgaacaatccatccctattgtgggtgaaaagcaatcgacccaaaagtgtcttctagattggcaaaagatgggtgtgt  
ttcatatctcaattttcacaagatacacattgttatactgtttttcattttctgtttttcattttctgtttttatcacgtaaagaacgagttcgtt  
gattcagttctgtgatgaaaaaattgtatcggatcgtctgtcatgcatgtttctgaagctaaatttctttttattttattgtaaaattcgtttcatt  
gttttttacttttttttttttttttttttttttttttttttttttttttttttttttttttttttttttttttttttttttttttttttt  
tcttttaccttagctactatacgttaagtagnnnnnnnnnnnnnnnnnnnnnnnnnnnnnnnnnnnnnnnnnnnnnnnnnnnnnnnnnnnn  
nnnnnnnnnnnnnnnnnnnnnnnnnnnnnnnnnnnnnnnnnnnnnnnnnnnnnnnnnnnnnnnnnnnnnnnnnnnnnnnnnnnnnnnn  
tttttttttttttttttttttttttttttttttttttttttttttttttttttttttttttttttttttttttttttttttttttttt  
ttctcggcttcccttttaacagtccaatcgtataacggagtttagtgttcatttaaatttcgccaccacataatttctccttcgcaaaccacaaa  
tctataatataaaaaattggaaaaatacaataaaaaccaagttaaaatattgaaaacgcatggcttaccggatctgaaataagcaagctg  
atgtcgtactgagagcgaagtaagccactacctgttgagactccaaccaacaggaatctggtgctggcgaagctgaaacccaaaagcc  
cgccaagaatctgcttctgctgatgttccgggtgctgtaacccagctaccactaccagctcttagctaaccctctactactgctcctctagcg  
cttctgtatgttggaactgacccagtgactgaagctatgctttcagctctcaacagattggaccgtagcaagtattcgtgtttgcc  
gtgacccgttactcgtcgtctttgggctatgcttatgtcaacttcacaacatggaagatggctccaaggcttggacgaacttaactacacttg  
attaaggccgtccttgcgctatcatgtgtcagcgtgaccttcttgcgtaagatgggtactggcaacgtttcattaagaacttgaccctgc  
tatcgacaacaaggcttgcacgacactttctgctttcggcaagattttgctcgtcaaggttgctgctgatgagttgagcaactccaagggttac  
ggattgtcattttgacactgctgaatccgctaacgctgctattgagcacgtcaatggcatgctttgaacgacaagaaggttacgttggtcatc  
acgttagccgtgtaacgtcaatccaagttgagcaaatgaaggccaacttcaccaatgtttacgtcaagaacctgataccgaagttaccgaa  
caagagtttagtactatttacccctttgggtgaaatcatttctttttgtcaaggacaaaatgacaagcctcgtggtttggcttcgtcaac  
ttctctccacgaagccgctgaaaaggctgctgatgaactcaacgacaaggaattaatggtaaaaagctttatgttgccgcgcaaaaaga  
agcatgaacgtgaagaagaactccgtagacttatgagcaaataaaatggagaagatgaacaagtaccaaggcgtcaatctttcgtcaaga  
actgcaagacgaagttgatgacgagcgttaagactgaattttctgctttcgggtaccatcacttccgcaaggtaatgactgatgagcaaggca  
agtctaagggttttggttcgtttgctacactactcctgaggaggctaacaagccgtcactgaaatgaatcagcgtatgctcggcgaagcctt  
gtacgttgccttgcacgtaaggaggtccgtcgtacccaattagaagctcaaatcaagctcgcaatcaattccgttcaacagcaagttgct  
gctgccgtggtattcctgccgttcaatatggcgggtgctcttatctatggactggcgttaccatccctgctgcttgaatggacgtggtatg

cccatggtcctgggcacaatggccctatgcctatgatacccgaatgcctcctcaattccctgcccgggtgctcctggctaccctggcatgagccc  
tcgtggacctgctcccgttcccgtcaaggctgcccctatgatgctcactggtgctcctcagcccggccctgatgagctgcccgttctcggta  
tgctgaaagattactgctgctgacttagctgctgtcccaggaaaacagaaagcaagttctggtagctcctcaccacaagatcttcatgcg  
tgaagagaaactcgctggtaaaatcactggatgcttttagaaatgcaagattctgagttattggaacttctgatgaagatgccgctcttaacga  
gctgattgatgaggctcctcaatgttttacgcaatttgccgatcaagagcctgctgctgatgagcaataaagtagttggtaatggatcttatactt  
tgaagaagtgatctcaggttagaaacctataggaatttagtataatctttatcttaacgttgggtgttttattcgttaacagggacattgtttgca  
ttttacatatgtcggatgaatgattgagattcccgtgaaagctttttaaatgcagaatccggttgataatacaataaactttataaaaattagtt  
atggatggtcatgtagttggatgataaacttttctattcattacgtatattatagttgatcgagttgatgctcattcattgcaaaaatacgtga  
aagcttgtttcttttatgcttcaaaaatcatgattcagttcatcacaagctttaaatacatttaaaagtgttaaatacaagtagcttaataagtg  
actagatgatctgacagctatttctggcaacctgaaaagtaaaatgaagcgttacatctcatcaaggacatcgaagatgtttcataatgcttatgct  
gtagtatcagtagctggaaggacggacgactcattctgcttgcctcattcatcaacacagatttaaaagcttccagggacatgctgctcga  
atgtgacagtcctttcacctaagaagttatgactggagcataatgtaaggaaaatccatagattcaatcaaaagaagctgtaagtcagaaa  
cagttgagttgctattataatgacagcttcatgaatgactttgcaaacgatcagaggaagaaatagcttctaaatcttgaacaaatactccat  
tttctttccagaatggtatagaaaagctcagtagggaaggcaagattctacagggcaagcagaatgcttcatgaaggagttatgaaaa  
ggtggcttctgatatttcaaatagattacaataactaaatctgcttctgtttttatataatctcagatatcattagtagctgctttgcatgctta  
aaaataaacgttacttgcacagaccaagttataatattccgctcacataccaaaaaccagaaaaactccacataattcaggttcaaacggtt  
tttgacgtaaaagcattgagtgataatttattggactataaacaacaaagatttagtggttattctgaaaatagcctacttgattgataattggt  
gcctttcttagaattgaaacagaatcattaagctacactttttcaatgcccattgagtttgaaggagcattcaaaagcaaaagaaacgtcaat  
ttaggcggaaaacgcacgacgaatgatcgtggtgagttggttagaaaagctgagattgaacgaaaaatcgagaggaaagcgaacaaacaga  
gtttgtgtctattcagttgcaatcttctcgtggagttcttgacagagaacgaataaaaaacgaatttcgctcaaatggtacgaaaattattac  
cgttgggtgctcatcagcttaacgtatctgactgggacaaatgagtgaaatgatacagaagttgtttttgacagatcctcaactggaattgga  
gctttacagaacgtaacagcgcattgctgatttttgcatagtgaattttcccctaaagatttgacgtcttcaaaagtaaatcaggcgggtcag  
atgaaaagatcaaggaaagcagaattatacaatttctattcaattaaatctgaacttctctcagcttctcgggtggtggaagcgggttactacc  
ctttgtttaaagtcatttagcaaggcctccaattattaaggaagaaaggcagtagcagattataaccgctttttagaagcttttaggctatttctc  
gtcttctgaggtttatgaaattctatttactatgattgttaatgacctttacgaatattctcaccttcaacaagaatttccatgttaggagtg  
attttctttcttctttaaagctcttgacgatacaaaaagataccttcaatgaagttcagcaacttttattttcatgttttacgctgattcctatga  
gtcttctgctgatatcattcatccaactggtgtttcgaaaatattccttcttcttctcgaagaagcggatcatgtcttctcaacaagtt  
tagaaactcaaaattattctgtctggcaggcgcagctcctattatgcatgtagaagttcaatcttcaacgttatggtgttttctcgttagcttt  
ggatgccctataactcattctgaaaactctgcatcaatcgctttaatgctcccgtagactggaagaggatgaggatgacgaatttctggttctc  
aagactactatgctcagtaacagttgtgtaagcaatttaacaaacttaacctcctcaaaattgagtagctcaacgtcttctgtaagcttta  
tcatccaactttataaccaaggtcttactgagattcagagttctacaatattgaacgtttccatttttctgctatgtaaaagctatttcttcaa  
atcgcacttccacattaatgtacgtatccttaattgacctgacgtgtagaacgaacagctcattgtacaatattcctgggatatttaccgag  
tctccatatactactattctcagggaaagtcagatgcaacagattatgcaaaactaactccggttattggtatcaactcaattgctactgacgtt  
tactctcagatgttttacaatggttgacgaagagttcatagcgtccagcataatccattgtataatacacgggacaaatattgtatccttctaaa  
aaatctgttttgggattgattgggatgtttacgcatcaaaagaagtaaacgacaattcactggtgatataactcagcttaggtttcttcaacat  
cttcttcaacgattgttccgaattaattatcgaacacatctcatgaagatttcttttgatggaagaatattcaactgaaatgaaatgaaa  
cgggagcactgcaagaggcacagctgcttccactatggatattgacttatctacaggtatgaaagtcgataattataatgaatcaagacaaaa  
ctgaacatttgaataactgctccttttctaccatttctgcttctcattctcagcaactattacaatggataagcaagcaaatggtttta  
tacaaccatttggctattaaacatgcggttattctcgaatcgaattttgatgatggtttcagatgattttacaatctaggaaaaatgttcaaa  
ggatccatccgaatcagtttggatgagcatggtgtgtagaggaaaggaattgacggcgggttgacaaaagaattttgacaaggtgag  
aaactatactacgttgaagttccggtactaatggttctagtagatgcaaaactgttttgataaaatattggttatttagcgaacgaaggca  
catctactctatcctaacactcatgcatatgcacaagatagtaagttagcgttatgaggttcatgaaataactaaccgtctattgtagttgagcgt  
tacgttgtatgaatttttagaatgctgatcggcaaggtatataatgaaggaatacaaatagatgccgcttctccttcttctgatcaaaatgg  
ctaggacatcctgatttttgatgattgacaagtttgataacaatctgtatgagggtgatatttctaaacattatgatggcagatgtagaaa  
tgacttggctcctcaactttacagttgtcatgaagaatttgggtgtcgaatgcttgaatgaatcccaatgggggaaatggtggcgtgacaaat  
gacaaccgattgcaatatattcatctaatctcaattatttgaatgcacgcttactaaacaatgccgggacattacaatggtttactcaaat  
cattgatcctcactggctggccatgttccatgagaacgagattcaagtttagtagggcggagatccagtagccatcagctgagtgattgaaaa  
acacacagttatgctggtggtatgaattaaactctcctactattcaactgttttgggaagtgcttcgagaactgatgaagaagataagcgtaat

tttgtaaagttgtcacgagcgttgcaaggccaccaatthtagtttcaaagcacttatgccatcttttgtatccggacgaatggcgaagatgaatc  
tagactgcctactgcaagtaagtttttagctttccactattctgattcttactgtttgctaacattgttttagcacgtgtgttaactgttgaagttac  
ctgtgtatacatctaaaaagacattaaaagagtaagtaatttaattttgtaaagggcttactgacacgttttcaggaaactaatagtagctg  
ttcgttctggaggtggttcggattcagctaaatgccattttgtttgtattattataatgaactttttcgtctccatctatggttaactaggtaaagac  
atgatgttgatgaagttatattatgaaatthttttcgtttcgtcttattgtaccaatataaaagtaaacaggaaactcttaatacaatactctt  
caaggaaagatacaatgtaattgacatacagtttagttatccagttatacttctgataattgcaagaaaaaatactcgttaataaaagcttaa  
aataagcgagtaaaagtataatgacgttaattataatataaaggaactgttcataaagactgctttgtctgcaaaactacctatactcaaaataca  
ggaaggaagatthttctgtaaaccttgtaactaatatgtttaagagagctattctccgatggtaaaagcgtcttatagattccagtgcaatca  
tctgtttttgctttagaaatagggacatagccattcgtgcaatcacctcaaaggtgaagaagtcttcgagagatcaagagtttgcggctccctctgt  
cgatgaggaagaagatgtcaaaactgtatgggaaacgttaaggtcaaatctgccgagaggaggggttccgttgaagaggttaataatg  
aaacaccagagttgtaaaaggtgacactgctcctataagaaaggtgtggaacaaatgatggcctccagaatcttaaatcgggaaataaag  
actccggatcacctgaagaagaattaaggatttaaatgcttctttgcctgtacttctcaactattatgattcccacttactattaaacacatt  
tatgattccaatattacaagtgttacctgcgtacattctttataatgattaacgatgatgactatgttcgaatagctatggcctattttatgaataa  
cttagttcattaaataatattttatttgacattcgaatttcaattcctttcctgtctatagtaacttctcaataaagctgaaatttacaagga  
atattttacctgctctcataagtacgggaaacacccatttctcaacacctataaaatgataagggatcaaaatggtatcgtgaagctatact  
aatcctgatataaagaaagataatagaaaagacgaattccgcaactgagaagcatgaagttacaattacaacaaacgaagatcaaaacga  
aaactaaagtcaacgaccctttactctaaaacatgaaggcaagaaacgatacacctgttaaaataagataaaaattaaagaagccttatat  
gaaacataatcattcaactattagctaacctgctccgttcgagtatcataaaacgataaattccaacaaacgacaattcacagatataatgcgat  
gttcccagcaaaatthttcattcatcagttcaataaagtaataggtatataatgcagaaaacattcataaaaatcgttgccttaactaaaaca  
gcattatgtaatcccgaagcatcaaaataacataaatatccataacctttgcaaaaactagcgcgacttcatctacaatagcatcagcaagatt  
attggcaaggcgttgaacgttcaaacgatgcttatttttctcagtcgtttacgagcaaccattaccggcacactcgactaaaatthtttagtac  
cattctagttttctaaaaatattccgtacctgttaaccaagtagttactgaagaaccaagcaacacacctthtaaatgactgcgtccacgactg  
cccataacaaccaagtcggctcgacatagtcattataatcagttaatatgacaaaaaaagtgacgaaaaagcaataaacataaccatttcc  
acaattaagtgtttggcttctcgtgatgaataactcaatgttcacttctatttcgagaacagttttactaagcaatthtaaatgactttgtaattt  
tttctaaagtttccatctgtgaagattccatagctccatctctaatttcggatcatcacattcaatcacatcgactataataagagatcacctttc  
ttaagagaacacctcggccattcagcagcatataaacttctgatgataatctaagtaagaagtaggtactatttcttttgagtactggc  
agcgtttggaatthctctacgaatccgtcggattgttcgactggcattaggaatccatcgtgttgaccgacattcacatctagactttggcag  
tacgaaggtctgttcaatthcttcttggtcagaaccataccaattatcgacatgtgtagatacaaaatcgtatttggacgaacaggttcggacttg  
acctatttgaagaagaagggcaggattggaacgagatcgtcgttaggacattactatcaccttcatattcgaatcatcaaaaagtgattc  
cttttagataggggagaccaaccagtttcttgaggcacttctttactggctttaccacttttgttaattaaaggtgagaaacttccgagagtc  
gtcaaaagatataaaaggtttgtttggacttggttagccctcaacatccgaatcgatgaaaagccatctcgtctctctgaagatgaaga  
ggaggaaggtagagagcgagttaaatggagaggttctcattttcatcaagtgcacatctgatttcgccggagaatggatcccatccttggcggt  
cttggatgtccagaagttgaagagacaggaggaggagaacaacaaagtggggaatccgggttcgccggagatgtttcatctggtgacgtg  
aaaggttctgtactggagagcttgagtagtcttgatttccagatgcttctgtcctcctttgagaagatttcttattgttacttatagaa  
ggtctctgtacagaagaagaagttgaaggtatactgcaaaagaagcttctcgtgatgtcgggtcggagggttctttaaagcgttaccaca  
taaggtgagagagcaaatgtctgttctggtgaagatgacttgaggtaataactagacaaagaatgtcgtttatgagaagtagctcgaggag  
actcagtagaaaataatgaagatgccaacacatcagacactttgttacttgacatggcagcggattcgaagctgaaaagaaatatttctttt  
tctcatcttcttttcttttctccttttcttcttctgtattcgtctgatataggaggattctataatgaggtaaagaagtcatactgctgac  
tctattcggatcttttctcgcaggttttcaaaaacaataatcacggacgataggtatcgaatcgagagccagctcacgatacttcttctcctcct  
ttctttcatcattttagaacttccagtcgttcttcatctagcgtgatccagtgaaattaccacatagccttcgaggtcattaataacaatgcaat  
tgtactactaaaatagttaaagaattgtcataaaacagatgtaaacctttgtaaaggttaataaactcggttagattgtcacttatgtaagg  
agattgtgttattttaaagcagtgactcagatcattatttaagaaatgccagaatcaagccataatggaaagaaagcattaggtttaaagaa  
acgagtttgatataattgattagagaattatcattcgttctcagctggaagcttttctgtgacgattagtaaatacttactattcatacgttccgtga  
atcgttcaatcgaacgaaacgacttacagacgacgttcttgaatagatcatcgcttttcttcttactttagacttttttctttagtagac  
agcaagaaggtcgttataggttggtttgtttcaacactttggttactgaaataaaacacttggcctgaggatataagaaacatagaaagtagt  
ttcacgtgagtaaaactttgctgtgtcgataacagttccttgaggcaacaggctgtaaacctcaagttatacaaaatgcaagcagccatgt  
ttattttttagtttaggtcttatttctgtcgaactcgtcaagcaagtttcatccttaacataatttagttcatgttatgtttgaaatthtaa  
aacgtaaagtagggcgtagggaaagagtgaaataacttgatggttaatccactcttatttgcacactcgcaccggaatcgtatgtctttgtattcatc

ataaaaagaaaagataaaataccaaaaatattccattcatcaaataaaataagtagcatgtagcactgcacacctcaaagttagatgtgccgag  
ctgtcttgataagatgggagaattaaaggaaactttgtcagattccacatatctacatagaattactttcgtggagtagtgcgcaagaaggaa  
cgttggatgtatgctttctggtcacgaagccaacggcgataatcctgatattgtagtgattcattatagataaaggaaatcatctcgtctttata  
cataccgacaacgagaaaatctttctcataataatctgtcaacatattcgttagccaatacatctcgtttcttatcacggagagcacagcaca  
tacctgggatagggttgaatagctttcattgaaggaattacacgattcttctcaagtctttagaattcctcttcacgctataataaacgacc  
gtagcaaaggccctctgtttatctcaaaatctttcacatacgcagatgcaatctgatctgcttcttccgattgatcaatgtccaaacctgctccta  
tagaaggctctatcaaccagccaagagcaccagaagcgatcgtagctaagacataaatcgtaaacatatccaatcccatcattgttacagtagg  
atcaacggcgcgctcataaaatagaggaccccccaaggccaagcgcagcttaggaatggaagtaaaagttcaaagcgcgctgactt  
tttcttagttgaggaatgtagccaattcaatgtcggcgtcttggagttccctttctgaagtgtacattcgaacattcttcacacagcgaaaaa  
ggaaggaaggactttggcatttccatacccaatcgatttaacgcttctagaacccaatacataattcttcaacttatttggtagtaaacaggg  
aaaacgcgctctttgcttctctctccatttaccgaactgcataatcgtaaaaagggtatgcttcaacctcactatttctctatgtcag  
aaaggaagctatgtataaaagcttctgcaaatgcaacattagtagccattgttggtagacttctgttatttctggattttatcaatttttagaacg  
atctagagaatataattgacttatttggttattggtagtataactttgcacgtttaaaaaaacatgtctactaatgttggagcaacgga  
ttcaatgtccatagaagagacgaataaactcgtgttctactaggtttaaaaccttggacgtatcaggtgattctcagccgagtgaaaccgataa  
aaaggaacaagccgctctcgttgaccaagaggccatagctcttcagaattggaaggaagaagaagaaaaagagcaatgaaagaaaa  
caacaggaatttcatctagaattcaaagtatacgagaaaagaatgatcagcgacgtcgcgtgcaaggaaaaatcttggctgatattctcgtctac  
agaagaagaagaagaagcacaatcagacgatactcgtcttgggtcctaaagatgagagcaaaagcattagagaagcgcacgagcgaagct  
ctggaccacaagaaacacaggccagtcacaaaagaaaccacaaaaggaaactcccaacggaccagacacttcattagaaggaatgcgcata  
gctcatgaactcagaaattgaattctgagaacggtttaaacttaacgcttgcgattccgacattttggaaagcaatgatggggatttattaga  
agcaatgagattcccaacaagaggcccttccaaaagttagaagaacaaaaggcgaatgccgggtataagccttataagacgaagaaga  
agtttataacgattctgcacaaagaagatggaacagaaggaataactattatcggagagaacaatgctttatttcaaggaaaagatgcaaga  
gaggaggaagttcggctccaaatcgaggcattcgaattcgttctcagaactacttctcaattcctgaagttcagactatcgggatatacag  
ataaaaaaaagtaagaaaaaccgatctagagaagatagaaggaagcggaaatttgacgacctaatgatgatgaattcagtcacaccaca  
acagaagacaatgtatctgaagcgaatcaaccttcaactgctcaagaaaaacaggagaatattaagaaaaagattcaaggattgaatagt  
cagtcagctgtaagatgatgattacaagaagtttggctttacaagaagaactgctcaaaaaggcgaaggagcttacgacctgaacaaa  
ttgagagcatgttcaaaacaaaacaatgtagaagaggagaaaaggaagatgagaatgatactagaggaatgataattgatgatactcgt  
ctttcgttattcttctcagcaagtaattgatacagagcttctgtctcacttaagagaaggaaagcgaacaaatttctgagaatccatatactgt  
cacgatcccaacaatgttgaatccagcaatgatatccctgtacaaggaaccattgtacaaaatactgaaccccgatcaacaaggataag  
gtaactgacgttctcgaagatgaaccgcttcttctggtggttggcacggttgaatctcctcaaaaacaaagggtgcttaagtttctgag  
aagctcaagaaaagattcgaagaagatgaatataacagatggttgcgaaaaacagagtgacgacggaagcttgaagaacaacgaag  
gcttcagaagagcaagatcgtgtagtggaatgaaccatagactcaaaaagagcgtgaacagatgccaacagagagaatgaaaaat  
gggatcgtctaattgccaaggttgaatggagcagttcaagactacaacctcaggtgaacattcgtctacgttgacgaattggagttgaattgg  
gacaaaaggaggcatacaatacttattatctcatcagttccatggaaaaggatctggaaaagcaagactgaaaagcggttacgaaagattg  
aagacatgaaaaacaagagagaaagccgatattgaatgatgaaggacatggtttatgtatgtatgaatttaattatgtagtaatacaataa  
tgtcatcatcagaggttatttttctcacttctagcggtaggcaaaatcgtcgtctactggttcaaatctgggtattgtaataaggacaaggc  
ggttaaggaaaagcatgtgtgatacacatctggaacgttctctacgatcagaaaaccacctgtcttctgatctttagcacttagaataaaacg  
tattaagtcatcttctgtctatccactcaagcttttaatgatcgcaatggggataacaccaccatccataacaagtctaaaagttaacgagtgaa  
aagtaaaagtgaagcttccacttacatctgggagcttttcaggacgaccattcagccctcattttcgtttgcttctcagccaccagccc  
agtaagtcttggtaattctgtctagtgtccaatatagcaagagaagctacacatgtaaaaactgaagagaagttagaatgacaagaact  
tcaggtaatgtgaagataatgattataaccataagcagcatgtttcagctccaggcatagacaaaaccacctgcaagttgaggcacttgag  
aatccaatcgactcggctgactggttcaacatatctagtcgacctagaagtgccaacaattaatgccagcgtaaagaaaacgagcatcggtt  
cgccccatcggcactttcatagatccgtcttcttttcaagctaacaatatcttttaaaaagcaggttagatatctacaaaaagattatccgt  
acaagaagctacttttcttattgattctgtctagtgatccagcatcaacaaaacctgaatagcataaacagattggtaatatgatcatcatgt  
ccaggatgcaagcaaacctcctgaaaattctcaattagtacacgatcactataaaaatgctaaaaaagtgtcaacgaacctgactctgta  
agacatgattgcaggaacaaaacaatttctctttgtaattcttcttattcaacatccagtagctcatgcagctcaataaatagcactaac  
gtgtaaatgttcttcaacaaaagtctagttcatctggcgtcgtcgtgaaactgtgaacgacgatacatttcttcttcttctgacactgg  
cccaattcattcaataatttaaatgctgactgttccaatccatactcatggcgaatgatggttataagggtgaggttgaaccaacataaaa  
gaagcgtgtgctcgttgcacatttaattggtgccttattgaatttcttataaaagcttcttaaaaggaacacctgttcattaaactcttt

athttcatttccagagagcatcaaggagaatcgatcatttcaatgaagcatcaaacagcaagaatctactaacttttctatttgcaggattct  
ccacacttcatcttagcttacatagaattgatttgattcaagaattgttaaatgtcactgcttttcttctttttataactttattgacttgcct  
tttccgtctcactttaggaaactgaaattattaattttaaatacaatcatgtgtacgacaggaatggaagttgtcaacttaggattccagataca  
gtgtcgcgaatcattaatattacaaccatctatagaccccgaaaaggcatttccgaatctcgcgtccagagttgattgcatgctgcggttaa  
aagagaatacctggatcagctgagagcctcttggccagcggtagtacggtgaacgcacttttctatttcttaacattttagatccttctgaaat  
agacctgcttggatggtacccatgacttgtcgtctttagcttctattctgtcgtatgattctctcatgaatcatccacctctgttccgac  
caaattggtaagcggcttctgttcttagtcttaaggcacatactcatcttatttagatctggagccattaacattgggattttaccagcagt  
cttaaacccatcggtgtgtaatagcagtaataattatcttagcatccctttgctttttaaattttagaaaacagaagctggattaatacatgc  
tcgattttaaactcagcttacatcttctcaaaactatacctataaacctaaacgaatttcaaagtctattaattctaaaagtctaaaaacatta  
tgtctaaattattatgattacttcttccatagcacacaacaaaaataaaaaaaatgagaaccagacaacaaaaattgtcagctctccggca  
tgaccgaactagcattgaaaataacgtttaaattgcggttcatcaattatctcgtttaaattacatgaaaacaatgcaaaagtaacgacggaac  
tttccgtaaagtatgagtaaaaccatcaggaacgctccaatatagacgcacattctcgtgtaaatcctgatagtgatgcctctatatttccag  
ttagaatccatctcgtcgttgaatgttcatactcacctatttctaaaactcgaagtatactaaaaccttagaacctcgtatttccgatacct  
tccaagattgtctatttagtgagctgtgtaaatcggccatccaatttccacaacaactaattgtgcattattctctaaactgaagcaagggcgaa  
gggggatcagctctccacttgaacctatcagatacgtcgttaagaatcgagttttggcgtaatccagaaaaacggatggttaattata  
ctctctatggatggagcgtcttagggctaaaactaatcatctcagatattaagtcaatagccaaagctccatattcacccatcaagtcaagttct  
caagattaattccccttttagtatattagattcgcattcatattgattccaaacggatgtttgccaccggaagagtgaaataaaaaatacatcc  
taaagcgaataatcagttgcatggcttctgacgaatctcccttctgactcgtacagcgaattcattggcttctttgatattaaacctcga  
gaatctctgagaacccatccataagagcctcagctcctaaaagtggagatgaaatgacttttgattgatattcatttcttacttaatccaaa  
atcagatattaaggtttgataatgaaattggagttgtttgcaacctttcgggagagtaaaaatctcggcctcaaactcacgatgaactaaatct  
aggctgtgaaggtgtctcaatcccagctgcgatttggtaacaaaccaatcctgtctattccctgtaccatcatggtaaatcagaggatgctcta  
tcaaatcagctaaagtgcattcacctaattcgacaacaataaaggaatctatcactttgttctgcaatagtagcgaacaatgtttggatgatc  
gtcactttttgagaagctgaatctctctgttagcaactcatagaaatccaaaagaatagtttcacagcgcacatctctatcttctgatttctc  
atatacaatagtagcattggctccataaccaagatttccgggaaaatagttaaagaatcatagtaaaagagccgtcagcatttctactcgtagt  
gttctggataacaggccttatgttaccgactgtgacgtttccttctgattatcagtttgaccattactgttcttggctgagtgatctggcacgttc  
cacgttcatgttcatcactaatcttttcttttccggttctcgcagctgcttagctataaccagcctttgtcacatctattataccattattagaagtt  
ccgctcggcagccttagttccaaaatttgcctcctgtaacaaaaaataagaggctagctgtcagagaaatgccaagaaaaatgaaccagag  
caatttagatttggagccgaatcactgtcactcgcacccaacaaggaatttactttgagagggaggaaccaatttatcagatctgctccctct  
aaatggtattcagggaaacaatcagttggtaaagaaagtaaaaggaatttccgtagtttaagtggtatccatgatactgtaattgggtac  
atgtaaccttggtacaataacacgcggcatttggactcagaaacaagaggaatgtctttgtgacatagcgtaccaattgtaattagaaa  
gagtgtaagataaacgcttccagaatcgttgaataaaatttggaaacataatgaataaaatcatcaattggttgatgaagcaacaatgaat  
taggagaacgatcgcattatctcgtatgcttctggaaatgatacaacatcgaagacggaagtagcgggaagagcgagattaacagtttgaat  
aacagttttctttcaaatctaaaacgattaaattattatcggcattaggaaacccaatttggaaatctaaaggggctgagtaagaagaactgtg  
aattaagtcactcttcttaggactccattcagaaaaacaatatccaaaagaagagaagaatcctgataaatgtaaacggtatattcagttctgg  
caatatctataattgcttgcctgaccgtggcgttctcgtgattttcatctaacatgtccaaatcatcagctgctttattattgggttctgctgaaa  
aaattcagcgtctccttctcctaagtcttctaattgagcaaacgatttggaaatagatgcatcatatgaagatgcaacggtagaagtagcggga  
atcagtagtcagggcacttcccctggaatcatattgagaaagaaccttccactaaagcatctatcgtaaacaatgttgttttcttacttcaacaa  
agatgttggatccagtagcgtacgggagatgactgaccagattacgaagactatgaggaagtcaaccaaaccagcttgggtttaaagc  
atataagattcccctaatttaggttccacaacatagtgatcattactagagacatacgaagctgtttgtggagctcttaagacttatcgcca  
gataatgattaaagagatgatggagccagttgccttctcgttcttggagaaccggaaagccaaactaatggcttcatcttctgaagaccgg  
aaatattttagctctccgagtgaccataacctatggccagatgaccgatcgtagccgtgcaaaaggccatcgtatggtagaacaaggaagac  
gttatgtaatttgcctccgaaagcttttagagacatctaaagacggtgaaagggattgtctattgtcataatcttgcggtgaagctcggggaagat  
aacagtattaaatcatttagcagaattatgaggcttgggattcgacaatgaatgacagatctgaatgctagaataaaaaaaagcaacaataaaag  
gtatagaaaagaagaacctgatctcataagtagccaatgaagctgatgaaagactctttttgaaatctgaaaattcgttcttcttgaacga  
agctatagacaattctttaaattacaataaactcattgctttttagctaacatataattatacaggatagaggcaattctactcggaaatgtaaag  
cgtggttgtgtcgaagccaagttggataggaaataactgggagacaaactacgtaccagcctcgaatgttcgcatccttttgacatttaca  
aaaatgaccattcatctttagaacaataaaaaccacacataggacttcaaaaatggctgtaggatgaaagaaaggtgcttaccagcgt  
atacaattgcaaacgacaatcgttcgaggatgatgagattcgaatctgaaatcttttcttacttttaagtttctgtttatttttattgtttaa



tatagataatcattatctcatacatgttcaacttcacaattgccatcgttgttactaatgaatgatagaaatcctcactcatttcgcaaaa  
attattccgtaacttcttgaacttggacaatgactcaacttcattattgctttaaaccgtaaaacacaaaactcaccacatattc  
cgagaaactgtcgtcgaatgactttaaagtactcaatcaatcttctcactatttgaatgctcgaagtaacattgaaaataaaa  
aacaaccggtaagaaatccatgccgaagccttcttggccagggttcttctcacaacataacatgatacatcgtcttcttataact  
atcatgttcttcttgaatcatccacttctgctgatttgcataagaacgactttagcgtttcagggtgaaaggacgtaatgtcttcttctgtg  
agggaagtgaggcgaaagggtgaaggttgattggattcaaggagtgggtggtttacccttttagtttgtatcatctgctaagcttcttct  
ctctacagggtgtaaccaacgtgaagtcgactgctgtaatgcaaaaaagcaacaagctgtaaaaaagaagcaagacgggaatcccgctaa  
gctgctggaagcgaagtggttatctaccgggtttatgtggaattctcgtcaatgaattgcataaaataacacttgttagtcaggctgaaat  
catgagagcaaaacaacgtgctgctgatgagcggaaagcagcttcttcttaaaaaggtagcttgcgaagtactcaattttagtcttcttaac  
cttagcgttatagtaaattcctagaacaaacgttcttagattaaatgaatgtgaaattaatagatcgttcaacatgaaatctaccttcttac  
ttgaagatgtcttatatttcataggttaattcgtaaaaaattgttctcgtgacattataataaacactgaactctcgtcac  
cgaaaacagatgtcaaatagtaaattctaaagagcttgcgtaaatgattgactatacaaaaacagtaaacatttttcaaaagatacattgct  
ttcagcatcaatgtaaacagctagtaactaaaaatcatctataatgacaataaacaagaaagcctgtcttaaacacacaagtaacta  
accaaactataaaaatttataccaccattaacaaatcacgctagagggtatataatgcaacaaaaacagaccaaaggaaatcggagatgacct  
aaacaactatgtaccaatttcatgggatataaccttcatgatatcccagaaccttgcctattccatagacaagcaatttaccctaaaggaagtgac  
ggacttgcacacctgaatagctaaataaccaacacttcttgcatacaaaataaataatataatcccttgcactacgaagggaat  
gcaaacgctggataaacatcataatttaaggaatataaaatgaattcacttacaagctgagagcagcaccgaggagggtaacgataccaacg  
ataccagcagagaaggcaacagtggaaagcaccagaatcggaagaagcggacttccatgagagtcggaagacgggaatagctcatagaag  
aggaaagtgagagcagaggagctactagatccagtgagcgggagactcagaagattggcctatgtagaaatcgccttgcaagt  
ccagtcattacccttaataacgccctgctcttctgtaaggggagggtaaggtgctggacttagattcaagaagcaaaactaccacgaacatcag  
taagcttgggaaggtcaacataggagtagttaccgagcatggttaagaccaccaccgactcgttaagcttaggaaaccagagatcttagcaa  
gtctgtgttggatggtaaacactaccaccaacagtagtcaagttgggaagactcaagctattaagatcttgggaatccataaagtagagagattc  
gtaacggagggtgaggtagggaagagagacattgttaaggggtgctcggtgaaaccaagactgcccttagcagacttcaagttaccgacgaa  
aacggtgctgattccataaagtagtatcgccgtaaacggtggcgagcttgcgtaagttaacgtcaaccttctagcgttggaaagcgtggtg  
gactgggcagtttcaattggggcatatcaatagattcaatatactgttattgattggtgaaggttaaacactggtgacatcaatccctggat  
atcctcgaggttagtgcagcattggacatcacggccttctgataccactataaattggagatgttgcaagcgggcaagaccatgagatc  
caaggagccaacgtcagtgagtttaggagcgggaagcaggttcaaacgagttatcgtgaaatgctgaactaccagaacgggtctcaaggtcc  
tggaaagtgacgggttgaagattggctgtgggaaacttcgacatctccagtgatcaccttaacacatcaatgtaaggaagcagtgacaccactg  
tttgaagttgtaacgtacaagctgccatccaactgctgcagctgctgatgtatcgaggctactttagcagtaacgttttctgcagagca  
cttgttgcctgagcagcagagcagagaaagagagaaagagaaagagacttgaaaaacaacatgatgaatcagatgcttaaga  
taatgaaaagaaagaaaaactcaaaaataatcgaaaattaagaaaaatgcaaaagacttggcttaaatgacgatgcaaaaaagaacaa  
tgaatataaaagatgagaaggtctcaaaagaatgtccaactgaaaaaataaaaagaatgaaagacctaagggtcaaaagcagatgaa  
agcaataaaagagcttaaaattcaagaagaactgaaatagtgagaagtggtcgttggctgatctcttagtataggaaatcgtgccttat  
atagtagaaaaagccgggtttccgtgacttctcaagccagcgaacaagcacaacggttgaatgtttacagttacaagatacaaccagcc  
aactcgttggcagcagatgaatgaaagtaggtacgagaacgtgagcaacgcggctcctgattggcttaaccctactgatagcaaaagcaaacg  
ggccttaaggtcgggttctaggtaacgagatattgtattcatgtaacaaacgtgctattaacaaacaaaaggctgtttataaagctggc  
acagaaatgcaatagacaattgcgttctagtcataatgcaagcatttagaggttggacaattgtagatggctgaaccgttgggttcc  
cgtgaaaaaagtcagacgctgataaaatgaggctgactttcacatccgctcctaccagcactgaaaccctgtaccatctatgtgtca  
gttattcctgcctgatgatgcaagagtcaaaaacaaaaaaacaaaaaaacaaacaacagctgagttctgtttacagaaagtagcaa  
ttggacattgtagattgtcttaaaactcgagaaagctggttctggttctacgcggtataaacataaacaataaatcaagcagga  
cggacgggacgggacgagactgaactgggtgctcgggaacatgctgataaagttgagttatctgaagagattgacgattggccttttaa  
atttcttgcacatattactagattagacatggaagtttctatattatacataaaggattatagagctggaacaagtaaccaagc  
aatataacaaaagcaagaacataacaaaagaagaacaaaagacaaaaggaaagcattcatagaagggtttagatagaagggtgatt  
gattgaaatgataccgaagaaagaacacaaaataagaatcaacagactcatctgacgttcttccattgtttctcagcagcggatttagga  
ttcctggtttatcaggactagccagtagaataattcctgtaaaaaagtcgcttggatgtgatttagttatgtaaaagagtggtg  
gcaatgtttctacagattaacagaatgaaagggaaacaagaatttgcgatacttgtatttaattttgctgctatgttttaattgaatttgtt  
atgcttcttccgtaactggattcaattcaataggaaaagtccttctaccatctcgttaaccctaaaggttagaaaaggtaaattaagc  
gatagaaagatcaactacactgactgccagtttaggttttgaaaaaaaaaaacactccattgtatcaaaaggcggtaacacatgct

agaaaatgatgagattgatcatccagaggatatgtcgcaaacgagactccccgtttgatataaaaaaggatgtggcttacgattgattttgta  
gtttatgtccaaggctgttattcactagcttactctgtgaaatgtttgtgatactctcttttcttaatgtttgtctttatcttctgttgaggaaatc  
ataacttacttttctgttagtgaacgcagttgctttatggcagtgggacattgtcgtagataactgtgctatttgcagaaatcacattatggacctt  
gcatcgaatgtcaagcaaatcctgattcggctgctgctcaagaatgtaccgttgcctgggacttgaatgtacggcacaacacagtgttattha  
ttctctcaattactgacctcctttcagcatgctttccatttccattgtatttccgggtggctgaatacaagaacgtttgtcctcttgacaatcgt  
gaatgggaatttcagcgttatggatggactacaaacctgaaaaggagttatctttcttttacttacctactaaccgttcttttctgtagg  
ccattaatcgttaagcttataaaaaaaagattccgtattttttctcttctcattgtctaactgcttctcttcttcaatctttccgtgaacggcagt  
ttaacatcttaccattggagaacgggttttttattatgaattcaattgatgaatgtacggtaaagacgatagtcagatacttttctctttgttatac  
tcgaagcagcatcaccgcttttacgactcgtgtgtagaagcataagttatcagaggaactatcttaaagtagtgatactcttaattttgctttca  
ttttcattcgaatctaaaagctagtgatagccaattcaatttatgttatgtctcacacatttctgtacagcaaaaatgttacaagaagcattc  
tcttcaaagagttagctaactctgcatccgcttttaattcaagctcacaatttggccggtagcgttcatcctcttatgaaaagaatgaaccattc  
atgaaatcagataagtaggctctcattttccattcctttacaaccggccagttaaataagcatataataaaaaatcgaactcacatttgcggtccg  
tattttaaccagtgcctatagattactttatgcaggcagccagacttgcaccttttgcgaagttattgacatccactgaacaaacagaattaaatt  
ctttaaactattttatcagagctcattaacaaggatccttttagttcccttttccaggtaaagtagatgatttctagtaagaaaaactggatac  
ttgatttggcttctgttttctgcatgaatattcaaggattgcaaaaagactaccaagtagtaggatttatctcctcggaaactacggaaaagtta  
caaggctatttcaacaaaataaaaaatgaaaagcgtattttgctataaaaaaattcaaggctgaagcaaggaatgcggctcctaatgcgcaaca  
acgggcatctcctcaagcaccatacagaaaatgatgctttgtagagaaatccaacatgaaaatgttgaagttgattcaaatattactgaaaga  
cgggaccattagtagtggtttgcgaatagcctgagcatgatctattgcaattaatccatttcatggccgaacaagaacgagaaaaatccccatt  
tataataaaaaagtagtctgtggcagttgctcaatggcttgcctaccttcatgaaaactgggttatacatcgcgattaaagcctgccaacatcatg  
ataacggcagctggaaggttaaaattggtagacttagggcttggtagactaatcctgaccccttacttctactctagtgatcgtgctgctgct  
tactataggtatcgtgacctgaattatttagggctcgagactatacgcagctatagacatagggcaattggctgtatttaggagagata  
ctcgttttaactccttgtttaaaggtgaagtgaaaatggaatcaaaaaagtgattccttcaacgcacacaaatgctacggataatggagata  
ttaggtacgcctactgtagaaaggtggccagattttaaagattatcctgactatgatcaattgtcgacatttgaagtaaagtagtgaataatctgc  
ttccccagtggtatcgcacagacaaaactagagatccaaaaggtctcgatttgcttatgaagctacttgtttacgatcctaaaaaacgaataactg  
ctaaagaggcaattcagcatcctttttacagaggactcactggagtagaccgtaagtagtttctgttaccgagattttctctatagttttatt  
tttctcttttctatttttcaactaacatataataggcctttctccgatcatggcgtccagatccagaacgaaggatattgcccgatgattcggatctc  
cacctggtaaaccgctgacttctaccatgctcaagaaccgaaacgctttaaaggaaatatacaatcttctgtaaaggtttcatac  
acggcgaactagcgaactgacataattcaagtgctgaattgtcggacgctcagaatgaatcaggcctaattgaagataacaaatagaagct  
caaagagtttttaattacaaagagatgaggctcaaatcccttttgacgttttgaacagcttctcgatctccttctaaactctgtattgaaacta  
tttcttggctaccagcgttccatagacatgttccagtagaatggaaggcgaatcgtttctgaaattggctctattatcaaaaaaagaattt  
gatttgaatacacagtttcaaatgctctacagctgatggatttgcagatcacactgatgaggtaaaaaatcattgaaacgaaattttgtctaact  
tgtagcctgtcttattagttattgcagactatttaatttggctcatctatacaaatcccttgaagaaaatccatttctggccattttttcatac  
ttgggcgacataccttgccttggccgacaatacctttagctaataatattccggcagaatccagcaactgtaagtagattcctttggctatat  
cttcatatgactcttaagtgtagtatttttacttactctatgatcttaactgctggttattaaccattttaaagagctctgatttggtagcattc  
tcacaatctctcattagaactgtttgttcaacgacaaaagaagatgttttagcagaaaactccttattgatcagaatgatttacgacagtggtt  
ggaacaacaagaattgttgcctgaaaaagcatcctctaattcaatactacaatatggttaaccggaacagaactgcccctaactacagaggaa  
gtggaagattgatgaaaccgactgcttattaacttttaacagcgaagtttttggaaaatcaaccacgttttctgaaaaggatgtacctacagtt  
aaacaaatagagacgtttatctactaaattgccttttgcctgctgaaatctttctgatttgcctaatcattctgaagcaaattttaacaaagattg  
tcaagaacctacatctttcagataacagtagtccaacatagaagtagtctgattctgatgttgcacacgatccttcttggtagcatatagactggtt  
ccggtactttttagtacgaactttgtcgtcattcacttctcagatctcaactctaatctattcgaaaaagatcgaatggctcatataggaacaagt  
ttttcataaaaagccttgatgtacctttcataaaaaatatactgggtgatgacttattttgacttacaatcattctgcatggccgctgtacctcagt  
cggctatattatcagaagctaaaagtcattaggtctacataaaaagttacgaatttatattggcaaaaatcgtttacgaaatttaaatagagatat  
atccatagcattaatataatctattgtctaaccctaaccaatttaaaccaaaaaaattgagtgctttatccttgcctttccatttatatgctataa  
gcacactgagtggaatacaagggaacaaaataaatttactgaagactatcctgtaagagtgagcaaacgagatcgataggatacatccg  
cttgtacaaagacatagcaatcgtatcttgaacggtaagcttgccattgaatgtagccttaaagtagcctgggtacccaatggctccttgataaa  
ccctgtacggccttgttagtaaacagttgaataggctgaaccacataacatcttcagggttgaaaaaatgtaacgaacagtgataagtttttg  
tggatttgaatggatggcagttagaacagcagccttaactatcacagaagaagtagtactccttaaggaaagaaccagtagcagctaggcgt  
atgaacatcaggcataggttataaaaagttacagggcagacccccgaaaactataggaccgataatagtagcctaatgacaggttgccttagctgc

aaatatttgaatattttgaaggattttgcggcaccagaagctggagcatcggaatacagtgattcacgtacaagcgacgaggtccaacttgc  
ataattaattcttcttagaagctataggatctcatattctgaatgcttcatgactgtaaagtggaacagctgttctattctataggccattaac  
gaatatagcacaagcatattgtaggctgactataataattgtaaacagaaacaggcagctctcgagctctacaacaactgacattccaggtt  
agcttcaccgatgaatggctgttgaagcttcttaggttgcgataatcaagctgtacaattgtcgccattctggaggctcacttgggtc  
atactctcagcatccaaggctagatagaaactacggagtcggcggatattttcaagcttcttctgtaattcttaggttcaattcgagttc  
gtcaggaattcaagatcttctgttcttctcatcttcgacgataatctcactgagcttcttctgcttcttcaataatcaacaacattcag  
acttagcatcatcctcaacttcttctctgcttagcggcttctctcaggaccgccctcattttcgacaagtaattctgtgtctcaac  
atcactatattgttcttcttctcatccaccaggatccaaacggcctgatagctggaagtgcccttaggaacgcgtttagtaccggatagggc  
tcttctcgttatccaaatagtaaaagctcatcaagacgaacacctcgtggaggtcagattccatttccatactaacgtcatttggagcaa  
gggtctcaattgttctgattttcagttggagcagcaagttcaactaaaccagcctcattcacgttttcttcttctcatggatcagaaggttgt  
ctttaaatacagaagcatcatatgcaatcaactgaaaatcccgaaacctgaaatggatcaaggagctggatcaatcttaccacgtact  
atactttaaagcaagcttcttcttataatcaatggactgagcggaaagataggcccagaaatcacgcaaaagataccacgggatgag  
aagtcacagagcagcacaacgttaagagcatctgtgaaacgtcagaagcaaaactcgtatcagagaagaagaagttcatgaagc  
ttgcaaagatttcttaacttctccgcaattttatgttgaataactgacatctgtagcactagatattccttggcactgag  
ccgttctgacgactaattcccaaattcatcacttctgtagtagcagaagaccaaataatcatagctgacgccttgaagcatcaacaagc  
tataaaagttcttccaggcatcaaaaattgtaactttgttgaaccagtgattgtcgtgttatactgataggaatttctcaaacaggggaaga  
tcagcctcaggatccaccgacactaacaagtttaaggatactccacggatcaacgttcgcaagaggaacgatagtaattccttggagc  
accattttgcccgaataatccgatttctatagcagcctcattttgttcaactgtattgcttagcagatttctgctgactgctttagtagag  
gtatgtgaatacttttaggaccagcttcttggctcaacgttattactgtaacgcttcttaacgatgactttgaagcatgtttagacttaaacggc  
tttttaggcttaacattcgatctgtgatgatgagccatcttctgattttggaccttaagcaaatataagattccctgctgcaaaaattaaggattag  
ataaaaatataatcttcaaggaatagcttacaagcttcttctgtacaattcaaaatcttcaacaattcccaatgccgttttagca  
aagaaaagaaataaaccacttaattccttaattatgatttcttatactaaaatcagttgtctctgctaaaactagtttggcaaatgg  
agtttgttggggcaagtgaaaactgaaatcttggaggttagttatacttaattcttcttcttattgtagaagatagaataactattaaga  
tttaattttaaataatcataaaacttataataataatcacctaaagattaatgcttctgtagggaagatttcttggccaaatatttcttga  
caaccatagtgtagcagaaccactaaatgttaattataatgaaaaggaataaacttacttggaaatatagaatcacgcttttcttaac  
gcttggcaatgtaaaaagcttctctctgttataaccactttctgaacgaatgcccggcagctctgacttaggtcattaatccttctttag  
acagccttgattgtaattccttattttcttctctgtagagttgccgaaatgggaagacagaaatgtccggtatgttctatgctggaatttgg  
gtagcaacggaaagattcttttcttcaaccgagagctatactttgttataatgagattatgcttctggcgttcattcaagaatctgtaagg  
tacatataagtaggctcggtctctccagatccatatagacagaatcacaatagccgttcgctccttccaatccttatttctatagatatactc  
aatgcatctctatgtttgataaacgtcgataaaggattaccgagcctcaaacagatgggagttatcagagtcgatttctgtaagaattgattcg  
catcatatgactttgattcatttaagttgtaataagatcttataactgcatcaagaccactgatgattgtcatagttgctctcttcttaactc  
ataaatccgacgcaaatatagttgaccaaggcgggtccagaaatattcaagagttgtttcgcagaagcaattagttcctgtagatataatgga  
tacttcagaagatacgtttcaaggtagttcaaaacttcatcatgagctatggctgcttccacttgtatcattaaggaataactgcaccgaggct  
ttgggaacgctgcctaagggaattctggcactcaagataatatttttctcgggacgtaactttgaaggtaattaagaatcatcactag  
agaggttcttctgagctttaggagcggataaagaagttccctcttctgttaactctgcaacagttcaagcatcgtcatgatacccttactaa  
aataataatcttaactcggaaacataaccagccgaagtcaaatgttcttcaactgaagttcacaatgattaggtaaacgcaacaagac  
cctacaaggccggcgtagaaacatatacgttagaaaaagagtagtgcaactcaatagcaatattctccaatcctttctgatattatactg  
ccatcttcttacgaaagagatcttttgatgaatggtaagttttctccaacttaagaagagattggcttcttctagaatcagttaaataa  
gtacttaactacgtaaccgttattgttaaacactagagattttccatcatctgttctgagagtcggctttgaggttggctgtatgcttcttggg  
gagatccaaccatggacggatctgaaggagaaggtccggaagacaggatactgatagcatcagaataatctttccacgagcttgggaaaaa  
gcctcaatacaaaaagaggagattcacatattcagtaaatagttcatagcggttcatagtcaccggaggaaaaggaacgagaagcttttct  
cgttctgcatcacgaaggtagtaatcacgtttgaaattcgcacgttaattgttctaaagacacttctccttcatcaagttgattgactgcaac  
aatgattctacttgacagctaaaacttctggaataaggatccaaacataagaacttgaggtaaaaaggtatttctcgaagaaaaagtaga  
ggatatttactaataccaatttgtttagatcagagcatgagtgcttattcaaacgtaaatgtattgagaatggagagatattaataaaggtga  
attgtatataacagctttaggacttagggcagactaatggcttcttgaacatgtaagatttaagattaacaaggaagccttgcgtatctt  
gatagtaaaacttctctcggaaattctgttatgtgtaagcgttagcttcatagacattcctatataactcatccgagtcgcaagaagagg  
atggctccaaggaagatttaagacgaggactgagatgttgcagcttactgcaacaactcattgaaaaagacacaaggtcatagttga  
tgacatccatgtagagaacgggctcagatcattaaggagattgattgtcatgaacaagatgacggatccttgcattatataatcagctgc

tttctctgccaataattgatcattccgtataaacacatgtttggcaatgactaccaacacttagaagcttctgaaacgttgatattttatac  
acatgtatggaggaatctaaagttgaggtaccggattagcatttaactcgatacaataaagaatcttctaccagatagcgctgagaaaatgtct  
ttcgaggcatcacggatcacctttgttattggtttttcgtaaaggtaggataaaactcaacatgctccataacaaagtcatttacagaagttagtt  
caacaaatagaaaagaaaaaataaaaaaactaagtagcttttaaatatcatttccatgggtgatctgtacctatccaaatcgccattgctgt  
ttgaaacataatataattcacctttcctcgttagcaggaacgaattcaagagaaacagatcgtagccaattcaagatgcatcaattttgttttg  
aaagctccaaacgcgaaaaagagaaaaagatcgatgcatagtcaaaaatcataagtagttatcaaaaaacgatgcagacgatgctgttcag  
atttctcattaataaccaactttataaatgtaaatgacagccttttctgttgaaataactagccgagcaagtctctgtattgatgcatgactcta  
acatgacgcttactgagcatggtcgaaggataagcgtgctgcgttaacattccttaataaacaagaagaacaacatttggcaaatttc  
gtagaggattcttcttagatttttaggagttgattgttgaaagtttgaaagtttctatgaacataaagcgtcaaaagatttagcaaaagtgga  
caattgaaattagaataaaggtattaacgttatcgagatgaaataggcagagcaatcaagctcaaaagcattctcatttttaagtttagaacat  
ttgttacttggaagtagcaggccaaatccttctcaaccagccgcttttaaaacgccacctagtaacaattagttttgaaaacaaagcaa  
gatgttgaacacgttccataaatcgtttttcatacaattgagcttagttcacgggtcgttccagttttgttcttgatgcacaagcattttataga  
cgttcaataaacatctttagaaattaccactcatttgaagaatgctcattcgtgagttatcatgatccaacaacctgcagaacgctttgtac  
cattcattaacaccaactcccaatcttgcatatttctgtttcttgatggttcaacataaggctattgcccctgtactaatccatagg  
gaatggaatgagaggatcttattgtatcgtattagttcactaaagtgatataagaatcgtagtatgttcttttagagcgataaaacaaagtcga  
tgggtgcagaggaaaaaataaagaagaaggattgttaggatgcttataatgcaagtttctcctaatggataactcttattatgtttgctattac  
cttgttctgtaaaatgcttctcatgaaaaagctttgttctgcttgggtgaacaatcaatcagtcagatggttttctaaagaaggattaat  
aacctttttcttttgggtttcaaaaaaaggaaacacttgaacgaaatagcaacggtttcagttcctaccatagctctgtagatcaataccaat  
gaatgaacctttttcattctgtgcaattttttctgaatttttcatacaagaacagctttcttaagttatacaatttaaatattctgcttcaat  
agccttattgagacttgccttctcattcttttagtattccaagtagcttgggtcattgtttgaatcgtttccagagtaagacgtattctttgtcact  
ttttcatagtttaagattgtcaaatataaacgacgacttttcatgtcatgctgtaactacacattctgcaaatgcagatcgaatcaccac  
cactgccttcatcgttctccgctcatgcttttaagaagaagtgaaatcccttctactgtgctctcttttcttattcctctacactaggctct  
gtaactgggatcagattatgcactcctaagggtataggcagacaactttttcacaagtccttatttataacattcaatttagtattacgtacg  
ccctagatggcttcaattgctcgtgtacggcatgcttatgaaatccaccttgacaaagctagaacatgttcagcaaaagcaaaagagatag  
aaaagaaaacagctactttacaatcaaaccagcacttggggtagaacaaggttgctaaaagtcggatctacactaaaaattgttgaca  
aaagaagaagaacaaataaccagcagaagcatctctaaacctaaagtctacaggggttcaagatatttgaatgctgaagttggcaactttctc  
ctttgtataaccctaaaagcattccagctgatcctatatcaaatccatgatgatctttgcaattacaaaaggctcatttctctatctcatgagata  
atcatttttcaaaaaataactatgcaattcattaacgccaattaaggatcgatagttcggggaagcatcttgatacttataataaataactcat  
ccttatgctgtacgagatattagattaattgtcagtcagtaaaaaaacttgggttacttactgtataaaattcctcgatatacctagtaa  
acagtcactcagctgtgagtcattctgtatggtcgttaattcaggtaaagtaaacgaaaagcgtattaggtgtctgcgcataaatatcgca  
catctcaactccaggatactctccgaacttcaagattgtgctccttcaaacgataaagtaacatgtttcaaggcacttattgaaataaata  
gctagtccagccatagcctgctcaaacatcaacgtcactcattcgttaagaagaatcttagattccctgaaagcagcaatggcagctctc  
acggctcggctttcaggcagtgaaatcaactgaagatgttttgatagttcccaatcatctactaaccaaaagctttaaacaatcaggaactcga  
accttgttttagcaatgggtgttcttcaacggattcttctcagcgttctcagctcatctacagcggctcagaaaccgctcgtttttta  
tcatagaggaacaggagaggtgacttttgggttctgctctttgagacgtttcacgggattcaccctcatggtggtgagcgtagattcccgaga  
ccgtttccgataggttttagttgcttgaccagacgcttccaacctttagtagaagaagctcctttttctgtagcagcagactttgttttagctgc  
caaggctgactcttaattcctttgtgtttcaattttcgtcattccacttaataacgatcgggtccgaccactcatcccagctattttccatc  
ctctatagtgaatcaagtaggttgacgaatcttcttttctctgtgtctataactttagcttataaagtaaaaggtccgtgaaagcacaacaccct  
tcattcatttctacgacatgaaagagtaattgatggaagcggctcgtggtggtgaggtcttctacagtaccgccaagaacagaaagagaaaag  
acagcagatcctgaaaaagaaacttttaggcacttaacgaaacgttgggtggtgaacaatttgggtccagttctgagtcactctgaggg  
aagccaagttgtcgaagcgggttaattgctgtagaaggttactattctgttcttgaaggttaaaagtgtagaaaaaggaagttttattgta  
aaataaataatcaaggtagaataatacaaatctactaagcaagtgaggagttttttgcatcaataaaatcgaatttattctggaaaggg  
caaaggaaggactattatacctttatataaacactatgatataagctgaaatattttaaagtagaacaacgcaatgctgataattacgacga  
ccatattcatatggctgacaaaaactggctgttattccttgggtcccttctgcttcttgataaactcactttcaagtgaaagaacgggttaa  
acaagacatccattcgtattcctacagctgagctaaacaagatagcaggggttgttttcatggaacaaaaattctaagcattattgtcttcca  
aggaaacttcttctatcattcatctccaagaatggaagaactatttctctcgttttctgcaacgaacttctgcttgaactttatgacagatg  
taccaagcaacaacaaaccgattaaagaaaaatcaaggccaacattgagattgagagtaaaatactcggaaagaatgaaagagatcaaatgc  
tttctgcaaatatacgaagttctttcaagcgtgctcccaaggttccgatcaagacgaattttatacaacgtatgctgctaaaccgctcgcacat

aacggctatcaaccaacgtctggaaaacgcattgcaaagtgcaagcggaagttgatatagagcgtaaaaaatgttctacgttgccttcaat  
tggacgcgtacgtaaagttcttttttcttacttatctaactgattagacatattgattcgttaaacgatttgaaatggtcacaggaacctaact  
agaggaacctgtggctcttctgatgattgattgaacaattggagagacgctgcaacgaagtaacttttgcagtaataatgacgaactagactg  
agttttctatacaactgttacaatattttgatgaactgaagttccatgcgtaaaacattttattttcgtccactaagacttttacgataacctttc  
caaggaattcaattgctgaaagcgagttgtacattctttttcaagaagtattcttctattttttgagttttcaaacggtgtttcaactattc  
agctgtttcaggctaagcttgcacacaaaagttctattttcatggcgaaagcgataccataactctgagctacttttacaattcattcaaggaaa  
tgctttatttttctttttttcattattgagtttcttctttccaattattttccactaatatagcagatatagcaggtatccgagatctcttttgaa  
ttcgtgggtgtttctttatccgaagccaggttcgattaaagaaatgttctgaaaaatcaattgaaattcaattgaaattgttcagcttaaat  
cagcctgtttgcctatataagaagcaggaacgaggtgttcaatctagactttcggtgtgcaagataccatcgattctatattctttttgaaaag  
taactctcctgttttattactttatctgaaaaatgaagcctacagtaactactttgtatctagtaacaagcttacacaaatgaccaggtatc  
cagcttggaagcaagtagaggaaggaatcattggcggagttactttgtacagcttctgtaaaaagatatttccacaaaactgttttggaac  
ggcgaaaaggttttaaatattgtcgaaaacatggcgtaccattgttgatcaacgatcgaatcgacattgcattagccattggagctgaaggag  
ttcacattggacaagcagatagactgtaaacccgctcgaanaattctaggagaggtccattatcggtgtttccacaaaacattcacgaa  
gtcagctgtgctgctgatggtgcccattatgttgaatcggtctatttatgataccaacaccaagaatgttaaagaacgtattatcggtatta  
caggtctcgtgaaattttggacatatgtcnaaatgccccgctcagctgaattcagtgccattgtcgtgttaattctagtaatatccagagagt  
tatattttgagcgaagttacggaaaacgcatcgatggattgcttagtttctgctattatgtctccacgacgccctcgaaactgccaagcac  
ctccgtcacttgatcgtctccctcctgtttcgtcnaaatcatttcaagattcatctagctcggagttggttccaaggtgggtcctttgttgcca  
aacaaggtatataccctttaatccatcatttgaccaaggtgttctnaaaaattttctgtaattgttaccttggctgtcaatgcttccccgacc  
atgggagaaaagtaagaagaaggtgctgactttgcaaaatgtggtcacttgtttgaatataggaactctacaggtcgtgagacccttatt  
atgctctcaaatctataattcattgaatcgactgttgttttagatccagtaggtgctggtgctacaaaatctgaccgatgctatttcaacattac  
taaaccatgcttatttctgataatcaaggtaacgaaggtgaaatattgagcatcgccggcgaagaaggtattatgagaggtgttgatagttt  
ctcagcactcttactcaagagttccgctgttcaacgtttggtgtagaacggcgtgtgctgttccatgtctggcagacagatattgtcagt  
gatgggaaaaccacttatatacaaatggaacttcttactaggtaaaataactgctcgggtgttctttgggaaggtgtgatgggtgttctg  
ttcccttatccagaagataaactactgctcgggtctcgaacattgctttataacattgcccgtgaattggctgttctagaggaaaagcctgca  
acatctcatgctgcccagggtcctggaactttttgctgtttatcgacaaatgtatcttctgttaatcagtgcaataggtgactataatggc  
ttaatcgctcttattcaaaaagttaagaagaagattacagttgcatgagaggacgataatttctgataaaaataatgaattactaact  
agcatttacgataaacactcacaagaatggaaaaataataaggaagttagtaggatgtaatccagtagcgcactatcgaagaaaatgag  
gagttatttttttaacatgagtaaaaacatatacaaaaactttttagtggtttggcaagggatgctctacatcagcagagaccgaatttt  
ttatgatacaatataaaaagatcaaaaacttactaagctctgatcatattgttaagcagcttgaccttccagtagtcttctttttattgttctttt  
cttctgtagcgtgctagtctcaagaggtctcgagaagggagatgattcctgtcctcaatcttctgtccgactggatgttgttgaggctc  
agaatcactaaagacaatggtaccgttctgttcaagcaatagtagtaaaaactcgaatatagccaccctcctgtcgtgcaaaacatcat  
aaggatacaataggtcgtgctgagtgctgctgaacccatgttgttctgctatcatgagtaattgttacgggtagaaaaggggtaagcacca  
aactattttgaaatctcagaatagacttgcgactggcttgaagctcaacatgtatttggtatcagctcttctgtaatacgggtagcaatgtcaga  
acgcttgattttccactaggagaagaagagatcaggtatcaacccatagacttcaacttctggaaggtaaaaggtgcaaatgagcgcgttg  
ggtctcagaaggtcaaaatgattgtcttttaccatcaatcacgtctcttctgttggtagtgagcattaccagaaacaggttgaaccataa  
gtagtagcaatttgtcgacaatcagtgacttccagttattttccaggttagatgactgtggcagccttcaaggcagcagaagcagca  
gcaatcacgtctgcctttcaccaatgacagcttctcagaacgacaacagtagtagcaactaaagatgcgaaacctcaatgtgagcacctaa  
gaataccttaacaatcaccgcctttaaataatgttggcttcaggtcattagacaagggagataagtgtagcaactccattaggagaaa  
cggcagtagggaaagcaataccttataagagtcctaccgctgcaaccttgtaactgcttctcaagagttggtcaccacggacgagatgt  
cgaagaccttagcaccgtttacataagtcgacgacctgtttaaacattttgggaaagttaccagcaagcttacttgtgatagttcaga  
attgttcaagctatagcaacagcggctcttcttacttcttggtagcatttgaaggattatacgaagatggacctaactttccaggaat  
ttctgaagacagaatgagataaatttgcaagtcacagaaaacatcatcttaataaagttagcttagcgaatcgcttgtttacatggattgaa  
atacaatggggagtggaacacggcaggaacaaagaagaattcatgccgaagagtaattgtgtattacgaatgtaaaaaagttgaacaag  
gccaagggaaactgatgaatctgaaaatccgttaccatgcaacccgattcattcattgtctaatctattatccataaaacgtctgc  
ataattttcgtcagacgcaaaatcatcttgaaaactatgttactggatcctcccattcatcttcatctggatagctgtttgatagaagcttctgc  
gtttgaatcctcgtcaatctatcccgaagggtccttcttctgcatcatgactttccgatacaagctattttccagcgattcacgaaaagcat  
caggaacactaagagcatcgaactccgtaaccagtcggaggttagatggcttttattgacgttcataaatacgtaaacatattcttcag  
ggctgttgaagaggttaagtcgccatttgaaggtactcatggatcatagaatctaattgaggtatgctatgatacatcccttgactaaaaatgca

gtgtagttaagcattcaagaaaaaatagaaaaaatatatctatatttgcgacagaatcaaaaagctgattcattgcaactgcaactg  
acgaaaaagattaacggagaaaagcctacctttttggagacgaatagcatcaaaaacttttcatcttttagatggtaaatttggatcgcaa  
atcttggagagtccaagtaggaggaatggaaggaactgatccttttcatccaaatccatagagaatgaacttttgaattgcaggttcagag  
ggttggataattggaatcccataagaattggccttggcaaggggtggttctaggaacattcggtgattctagcaagtctgacgcagaagaaga  
cggacggcgttcacattcgacacatattgcttactgcttttaacgtctgagagagtcaaaaacttcgttcccttattagttttactcttcacagaa  
tttaattgactctccacacagatgtgatgaccgtggaagagtaaatctattcagtatatacttacaatcgcgctgaagatttcttttttagca  
attgttcgtccctatttcatgcccagctccaaatctactcgggttagccacaatttcattatggttgtttttttcttcatagagcatttacggga  
tcatcagttgctttcttttgacacgcaagactggttagaggcatagcttttctaatttaattacaatgatacaatcctcattgaccataaaaagact  
cgcaaaacaaatgcaattcttttgttggtagctttttcaccactgggtaaaatccaaaacaaaaggtcaagtgaccatttccatccaagat  
agataaaagtgtacagaattcttgaactcgtagaatattttttgtaaactgctgtttgtaggaattgaagatacgttctgaaaatctattttc  
atthaattttagctggttctcaaaggaaactagcgtagaagtagcgtgaataaaattgctatgattttttcttattcttctctgctttctca  
attgaaagagttcgaaaagaagctcctgaatccaaaaccaaaggcaaatcaggttcacagcaactatgaggatagcacttaagaatttatg  
acaaaagaaaaggcattctagctctcatctaacagacttcattatcgaatcatcaatcagcagtctacacgatacaaaaggaatttatacatgg  
gaatacctgcaaaaacacaaactgaccatacacaatgcttgaatgggtggacaatactgttgcgcttgcaacgattcccttagctacatttatt  
gtttttccctttcttgcacgaaaaaacattcagaaaaagacaccggccatctttttgtgggaccaactgaatctggaaaaaacgactgtt  
ttgtcaggtaggattatgaaaattgaatcattctattaactgtttcccttagctgtttacgaaaagaccaagctactgtgcctagtattgacca  
aacgaggctttatggaagatgatattgttctttagacttaccggccatgctagaacaaagcattggacagaaaaaaatataatgaaagtta  
cgatatacggctgtggttttggtaatagtgcaaccatggaccgagattgcatcaaattggactctttattttagtgactactgaaatgtag  
aaagcacaagatcgaagattttagtagcgtgaataagtttgattgtttactgctcaactgcaaacagatccaaactgctgtttgaaaga  
gttgacaatattttaggaaaaggaagctcaactcagcgtattgtgacagaggacgtcgattgggatcaactgcccctcagcttcaagata  
tcccttggagttccttctggcagcgtcttaaaaggcaccactggatcaatggattcaatggatggaatcctctctctagaggcatatcagcgt  
tactccttttaatttaatttaattttcttaattagaatcttgatgttttctgtgaatggaatttaggactggcgaattcctttcaatgcgaaa  
tgtttactagaagcaactatcttctgctcgttgacaaaacatcaaaagggaaaagacttaaaattgtaactaaattcctcacatactggtgaa  
ataatttcaattatgactttccatctcttttcttactaatatcctaactagcatacaagtttcttacgacacaaagtagttcataatcttaaca  
aataatgacattgaaaatataaaggaaaagcaaaaaaggaacaaggaatataatgtatacgtatgtatgtaagtatgtatggaatata  
tacgtttctacatggaagcaaaaaagaaagcgcacgggtgaaattgacaggatagtagctgtcaactgaccagcagcaaaaaagggagc  
attcgcctgtttaaattcaaacatggtttcagtaataataccagtgacaagataagggtcgtatagaggaagcaggacgacgatcctcaaagtac  
ccacaactttcatagcaacgaaagaggaatacggacagaggcaccacggctagcaataacatagttgaattgttctatagtagcgggtttcatg  
cttaccgtaagacgcaaatcattatcatcaccataaactttaaattgatccatgtgacgctttgcaattttcaagatactgctcaatggccttca  
tgccaccttggcagcactatccttgggtgaaacattagtggtgagccagcaccattccagtcacccaaaataggcttgggatggaaagagatc  
ttgacacaaaatcctcggcgatacgggtggaggagaaacagagatccagagttcgtcaccatttgaataccacggcatggaccaactgggt  
attccattgagaaggcatgacctggcattgacaccagaaatgttgatgcccgcataaagacaggcctttagtgggctcagcagatgtcacga  
gcaaaaacattgcccgtaccgacaccacaatagaaggacctttaggtctcgggaagccaccttaggccagccaaatgggctgataatag  
tcaacattgtgtattcttgttcaatacacaacaaatatacttggctggcatgctttccataagcttgacgcaacatcacgggtggtgaagtgtt  
agcagagccgtcggcggtataacaagcagcagagaacgagaatgtgtcaccgcccgaatgggatctctatacatagcaacgggttttaaaag  
ggtatctgagtataaccggggcttgaccagtggaggaacatcaaaagttcaaacgcgcaagtcttcaaaagatttggcttttggctgagggt  
catggtttgctcggatgtgattgaacatcaatccaaatatactcagccattaccttccatcctaaaggtcaaggtggcgtacttggccata  
attgaggccttggacaaaagaggatcaacttctgattggcacatgttgagaatctgtgaataaaaggaaaacaagtgagaaccagaaccttct  
aatctattcaaaaaggaaagaaaactcggtgaaaaacaagaaaatgaatgcaataaaaatataacacacccttttataaaaaggac  
aaataattccgaggaatgataaattataaaccaaaacaatataagaacaaggattaaaattataaaatataaaaggggaaggatttg  
tgtgtcttttttaccataatcctggttaggaaaagcgggtgttggagaaggtagtggcagggccgagattatatacatgtaaaaataacagt  
gtcaaatgttaccgacaaggtgcctacttctgctcatcccattgataaataagggttaagggttgcaaatcaaaaatgaagcaattgattg  
gaagatagagagaaaataagagagcttggtagcaagctggaagataaagtcgcccaatgattcgaagcacttttaggggaaataaaaaatgaca  
gacgattggggaatgggttcataagataagataaccagcagcttactacgctaggaggcttggaaacattctttaaagcaagaagaagaaggaat  
gccttattcagtagaaagattcatgagtggttgtttattggtaaagcaggagcaagatgttgtttagcctcattttcaggtatttttttt  
attctgaggtttgagagtgacccttcttcatgattggtttgtaagaatcactcaggttgtgtgttattttagcagcagagtagg  
cagtgatgtgggcttataattcactgaataagattcaccggatcctcgttctggaagcaggtatttccgcacaaactattgtgtcgtcta  
gaagttcattgtttatattcctttttcataattttcttttgcattttagcaagctcaaaaactgttcagtcgtcaataaacagaaacgcatc

aaactaaaactcttgccgcttttttagtaccttgctgtgattcatattatattatcttctgaccctctttacgaactcgacattctaccggcga  
atacttttgaataggttagagaaaaacgaaaaatcgaaagaatcatcagcaagaatcattgagttatcgaatagacgactgtcccactcatc  
gcttccattctcgtttcaatctgaccccatgttactgtacagctttcgtcaagcggcggttaccatctatccttttcacgatcgaatccatagtg  
aataaactaggtggggattggaatattccagggtgggggtgagaacagattgttcgactgaggtaggtagaaacagatcttttatcata  
gcaataaatgtctataagactttcaaaatatagtctatcttaggattcttcttaaaaaatcttatggctcgtctgctgcaatggatcctcctccaa  
acacaactcatcattgtacattgccaaaacttgaccaggcgttaatgccgttgaggattcaaaaagtcaaccactaataaacctccttgaaa  
taaagcctttgcgggctcagatgtttgctgatgctgtacacgcacagacaatcaatgggccctttcgattgctcgttcttgcggatccactcag  
tcgacatgtccaatgattgactcgaattcgtttcgaaatagtaatgggttcatgcttccatggcaaatgaaaatcgttttgtagaagcttcttct  
tccagatataccatcgcccttgaaattccggatcgccctgcggaagactcaagccacagcgtctccaattgtataagaccagcaacctgtagat  
ggagggtagaagccaaccactttccatttgctacgacgcgtataggttattcgtatgaagctagatatcgaccaaaaagcttgaagtggt  
tctacatttggtgatacaaaacatagcttggcttcgagtcgatcggcactctcatttagccggcatgagcggccatcttcaactcttttt  
ttctagattatgtagcggaaatattgttcgctgaagagcttttctggaccgtgcacaaaaataatgtttggtcttccatcggctttgggtaagca  
aagtgaacttgattacttgacttttctgcatagtgccagtggttagccaccattgttgagtagaacaagaccattctcccactc  
ccgagacatttctgttttaatgcctcatacaaggctccaaatttgacatagcgattacaaggacatctgggttggcgtacatccttgctcgtat  
agctccagactcgggtcaaatacccagctcaataatcctttcaaaataaacctcgcgaaggaatatctagttgttgcatacttctgaacaa  
gggaccagtctgttccgcggggcatccgctggtgatcatcttcaagccaatttcgataaaaacacctccacattaacccttaataaa  
aaatttcattagtttctaccttacagcttaaaaacatcaaggaaataccaacctgttttttaataataagccgaaaagctcagctccacgcct  
ccagacatggccacaaaaactagattaaaaataaaaattagcttccataccatccaattccaagaattagattaaaaacttacctttatcgtgtt  
tcgaggccattgactgaaagggtcgcgtttccaccttttcaaatgaatttgactttgaaagaagaattttgtattttcataaacaattcctt  
aaatcgttattgtagcaaacgtttcttagtagttgggaatttctagtaaatcgttataaataaatatttctataatataaaaggagaaaaacaaa  
tagtgaactaaaaacaaagactggatttccaaagtagggttctgaaggaaactgaaacagctccagtaactaagggttttttttttagtctc  
aatgactgaggtagatggtagcaaaagcaaaagaatttactctgattcatggttcttattccaatttaaaacttatttctcaatagaatcgttcat  
ttacttcttttttaacttctcagtttttttctgttataaagcatcatttggcgaacaaataaatcgtcaagattcgtaaacgtaagttagcag  
ttccagaaatttttccaattaagtataagcattctgaaaaagtcatttcttattctctatttctgcttattcaatttatttctctatattct  
gtttatccatggtttgttactaataaataaccgtatacaaccgtataaccgttactataaggtagcgtggtatcgttattctcaaaacacagaat  
tcagcagtggtcaatcattcagttacaaaaacaaagggataacgtggatgcaagctgtaggaggattgaaggcttcaactaaagtatttta  
ctgacaaagaaagaacatgttctttcaaacctgtgatcttacttttctcacttattgtgtcctcgttcaggctgttcaacttgacattccagcc  
gagtcgaatcccaagcttttctcagctgaatagctggagaaaaaacactaatgattgttctcagtgagaacaagcggtaaccgtggagatgg  
gcaaaagcttagcatggaatcaaagactcccaggcactattcattcaagtggtcaaaatataatgacgaagagcgtattgttccgaagatc  
tggactactgtaattgatattgttctatgaatacttgacaccgggtatgttttctgactgaacgcgttaggaaacccccaaaaaaagaag  
ctatacgttggactttgtcctatgttgggggctaggctgtcgtgagggtaaataatgaatggatgaattaacaaaattatagggtctatggaat  
ctaaccacaaaaacgatctgtaagttagacttcaatattggagctgatgctcaagattactctgtttacaaaaagcctataacctggagccag  
ttgaagctgatctcagcgcgtaaggactttataacgaggtaaaaggaaagatgtaacttacaacacgtgaaactaaatttcgcaatcag  
aatgaaagtaacgaacgactgtcaaaaacttgccttactttacattcattaccttgatcgtattggttacttggcagattcttattctcgttcttct  
tccaaagaagcatcttaccctaaaagcctgcttgaatcatatagtaaattgtggtgctggaatggtatgtataactttaaaccatgc  
ttatgctcctctattattttcaatgcttagagatggattgattgtcatgacactgtgtattacagggttcaaatatacaacgattctttttt  
ctctcgtatttctattataaaatatactacactacatataggataagcaagatgattcaaggcatgtaaattactattcataaattaaagatta  
aaataagttaaaaacaaaaagaaaaagaaaaacaaaatctccagcagcaagtgaaagatccattgcttcaacaatgataaaacttcaaa  
gcaaaacaaaattacacgtgaagcatacaaaaaataaaagttaatcattaaagtcattagaacaatggctaaatgattttcgaagaaactg  
cttaacaacttcaaaacagggcatgggactattgaccgggttattgattgccgaagcttgttgcagaaaagcgaatgtcaataatattagcaa  
cgaaccaagagaaaaatattcgaacgtcaaaataaactataaagctgtccgtgtgatttttagcatctacacgatattttttcacgtaaaaagtct  
tctgtctataagggcgaagaaagctccgaggagctcaagctctggcacaattgcaataaaatttctcgggagattattggtctgtatgcca  
taatgccaccgaaatttctgaacctggtgaaatggtcgcgtggaacctgaatattatacattttggacatgaagtgcgatgttctgctggaa  
gggatgtaggtagaatattgacatgcgattcgggaagacgccttgaaggaggcgtgactaaaccagaggatcttcttttcagaatagcaat  
gagtttgatgtaatcagaacaaggaaagagctgaaaggacaatattcggcggatgaaactaaggctgggttgaagacgcatagacagga  
aggatgataaatctagagattgaagctgtgaattgtctgactaactgaagaagaggttaatgatgaattaaaaaggtgtccaattcagctgg  
gtaaaagttgacgatgatcttctcggagaagaaggctactatgcgaagacaggcgaactgatggaagattatcggctacaaaccaagggtgc  
tgaataatcagatattttagttctatcagttgggatgacggtgagcatttgcggattagatcggttagcacctgaagaacgtgagaaggct

gtatagattcctttacatgcacggctcaaacattggatgatggtagctcttcaaaaggaaattcaccgacgagcatgagatagagcaggattcc  
acaaccccaataatctacatcacatccatcataataccgaccttgaatgacttcaggagcagcgtaatgaggagtccacaagaagtctcaaa  
aaactaccatcgtaataaagtggaaaggctaaaatcactgagcttaaccgtaagctattggagacaaggatgtttcgagctttaagtctga  
tgagacacattgtttggtagcagattcgatagcaaaagcaactgttggagattctacgggctacagcctgttcagacgtttacatctagcaa  
gcatgctatgaaggctcgtctccataaaatccaatgcaagcaccgtgactttgggacacgaagaactggtaaagggaaataatgtttgatgc  
cgaaatgatcttaaaatcattacttctgtaaaacatggttccaagtagtctcatctccagctccgatttcgtatctttcaatgcaacttttctt  
ccgtctcagaatgaattcctactatacaaaaactgtaagttcctcaaacacacaaataattgtccagaaagaactctcaagaattcaaggc  
caggagtcaaagatgctcatgcacaaagctttctataatccattgagagtgtctttctcattcaacttaccttttggaagattaccct  
cgcaagagtctcccaactccaaggaccaatgaattgagatacatcaacatttcaaatcaatcgatgaaaaagtagcggttgcatatgg  
cagagcaaccacctaggattttagatattttatgttcaaaaagagagaacagcatgtattgaagacaagaattgtttgttttagtagctg  
ggaatacctagtttacttaagaagtaataatagcaccattttgatgatatacaaatagagttcgctacgacaagcgatccgtaaacaaagaaacg  
gtgaataaaacgagagaaacaaataaagaaaaacaaataattggttttcattatataaaacaaactttttaagacctatacatcccttaaaaa  
atgtgctaaaattaaggtatctaagcgaaggtgaaatattacatggacaacggtaacagtatacagttatatacaaaagttacaaacgtgtt  
ggacatctcacagagcccaagacaaatgaagttcaaggatagaaatagatttatagtcgcttactgtatataaaaattatacctgtttctgg  
tttacgcttgtagcaggagtaaacgtttctaaacgaacagtgaaggtaaaactagaaaacaaataatgtgctttttatataaaatgagatc  
atagacaatacaactcagatctgttttaaacgcttagaataagtgtagtaccataaccgttttaagttccttctataaacagagaccgattc  
ccggaatttctgattcaaggaaaggccaatagcgtttcaatacaaaaaaggcctttcgttatttcttctgagtaaaagcggctcggttcctt  
ccgatccatctaaaaaaatttttatctcggcctcgagatagaaaatacattggttcaaacaggagccgcgactcgatagataagaaagatg  
ccctaataaggactcaacaattttctatattttgcttatttcttggcaaatccgagatataccagcttttctgcttaggtcgctttgtttacattta  
tggaatcatagttcggctcgtctaaatagtaagcaacggtagtccgagcggacgacgggctccgtacggctccgagtaaatatgtttggattac  
ttgttacaaaaaaaagaagctttttataaacatagcataattcatctttttccattacctttttatcaattccccttctcaaggggctctttttg  
gatttactttgtcagtaattgggaaaaagaatatgatggaaccgtggaagtagcaagtaagagtctattgattcaatggctaaatgtgaa  
accaaacagcttcttagctggcaaatctacgtgaaacggaaaagtagcaaatatcagatattactataaacgaaccaagaaaagggaggtcca  
gaggaagactataagtcgcccggcttttggatgccaggcaacagcaacaacccatgaaactgaaattcggagctgaatccgctggacttg  
agctttttatcagggcaaggtgcatggctgaaaagcccaacgacggctcgggttctcattgagaaaggaggattatcgcctttgtttcgacaa  
cacattcttaaaaactactcaaaaaatcattacttttctactgagcactcaatcgttctcgggaccagttcagcgaacttaaacagtaagaatgcc  
cctaaacagctgggtgctggaacccttcaaaaagcgcgcaaaaaaggccaaggatgctcgtcgtactttactttggacatgctagaagg  
aacctttcatattatgcaacccccatttctcattatgcgcggaagtagctttgagtagcgcgttgcagtgtttcttctgaaagtagcaaat  
taatgtgattctggtatagaggtttggaacctcgcgtcataccatcatgattggctgcatggtgcaatgctttagaacgtgctaaaaaaccc  
caggctttttcagattgaccgttggtgaacgatcccagcagtagcagcaaacagcttgattcgatatactctcggcttcgcaatgcttagata  
tagctcaaacctaccgaataggtcgctcgcgtgctgtaataacctcaacatcccaatataccgattcaactgctgatgaacatagacaaatag  
tggaagtcaagagaatctatcgatggtttgccctctgaaaattctcagccgtgattacacttcgaaaagtactcgcagcttggtctctattgc  
acgaactagaatgtttcattcagcatcacgagttacaaaagagcaaacatccgttttgcaccttctcccgtgatccatggattctactgtatct  
caatcatggtatgatgctgaagatgacacaatcagtagtgaagatgctttggaagaccttgagcattcagacggtttgttaagcagtgat  
cgcaatacaaaaatctgatctgatattactttgtcgaagattctctcagagcagtagctatgaagaagattcagctccgattctctgt  
ttctgacatttcttctgaaattacggaaccagaagagcctcgcagctgctcccgacactgattccgttatatacaagcgaataccagaggaagt  
ctcagaagaagtgaggtcaatggaataaaacgtattgaaagcctcaagatattaaggaacaaaaccaatcccattaaagagaagtagctga  
tcaaaatctgcttggttccataaacgtgaagagtataatgattctggcgaaccgaatattccaatgaagagaccgaattaatttctcgaat  
tctactaaaaataaagatgtatctagcattcaacggccggctaatgaactgtatccttctcccacaaagctgttctcgaagacaaaatata  
ccagctattgtagaacctctcctagattctttcagcttgagaaagaatattgaaaagatattagcttattcgtattcccgtttgttccaacgaa  
cctttagtttactcaagatatacagaagactggaatattctgaccttttagacacagtaacgaaagcaatccggaattgaagatattttatg  
ttgcggttttgcggtatcaaatctcaaacatgaggcacaaggaaagaagtgtagcgaaggtatttagtccgttactgggagaaacgtatgagt  
tggtcgtgaagataagaattatcgattttagcagaaaaagctctcaccgccccttggttgttgcagtgcaagctgacagctcctaaatggaatg  
gcatcactctcaagacctatccagaagttcggggcaaatctatagaactcaatactcaggggatgtgaatatacaattgaactgtgggcata  
agttgtctttactaaacctgctgtttttgaaaaatgctgctataggagaaaagtagctgcaaccttatgatcatatggtagttactgactctacc  
actggagacaaagctatcattcagtttaaggtcggaggaatgttttctggacgttctgaagaagtattgtcaaaagtcataaggtctgacggaagc  
caagatctcgtgtttaaagcgaatggacgacttactagagttggtgcatgttgaaactaatcaagtggaagactataggaagctcgg  
aagtttagtaaaagacctatgcatgctgtagcactgtttgtagcacaatgaacgaatcacacccattgaagatggcttattcctcc



tactgacacccgtttacgtcccgatcagagattacgcgaacaagattacttagaggaagcggaaccgttgaattagatctcgagcagaacag  
cgagagttacgacaagaatggagaaaaacaaatcttggctcccagatggtttcccaagtgaggacaaacgataaagtggatgattctg  
accaccatggctgatgaacgaagaccaacaattattggcctgtcgcagggagaaaaattggtcaaagtgcctcagttatggtaaattga  
aaaagtttgtgattctcatttcatgtcgttctaactcgcagcttactcttcttgcattgtattaatggatcatattaatcctaata  
ctcatatattaattgagattctaatacatatcttcaactgtatgaatgtttgggtatacaatagtaaaaaatgagccaaagtcctttt  
caaaccgggcatatgctataagaataccatcatagctacctgtaaccgaaacagcagtaaaaaggtaggaagtgttaaaaaattcattggta  
gaaaaatatgattcatatataatagcttttggatgatgagaattcactacatggagacagaggactttctggcaattgatgactcat  
agaagagcatcaacgtattacaagaaccatttggagacgccatggcctgcaacactgctaggatgagcagtagcaggtactgcaattatag  
tattctcaaacctgcccgatgatgcaaacatcctactctgttccaggcatattcatgaagcactatacagacaaacaggatcgagcatac  
aagactttcagcaggcctggaaggcataccaatctgctatagaacaagcagaaaaaggaaaatagggatggaaatctgctccgttcagggtat  
tcgactgcagatggccaatctcaggaaatcagcaggaggatatacaactggcttggaaatattttgggacattttaagcgaacacaaaacctac  
aagacttcaactgaacagagaatcctaattgcgagtaaaattattgagttgtccgaacctctggcttgaagtggaaagcgaagccgagat  
tatattatacagtttggctcgtaatgaaattaatgatgaaccgaaaaaaagagtcgtttattgaacagaccgctactttatatttcagctgg  
aaagccttctatgcggttctttatataccaagcactgaattaacaatgaataatccgacttgcctggattgatattgatgaataaccttgcta  
ctagcttactgtcagactgattatatacgaacaaagatatcacgaaaagctacttcaacagctagtactggagccaaaagccgttgactcat  
attacttggcttactcaaggaccgtacagtggaatgtcattctgggtgcgctgctgcttctttaccttaggacaaatgcagagcgaagtggat  
atcgaaacggctattaagaattatcgaatgctgaatctttacgggccacgacctataatgatgggtctatgatggctcacattgcttggacc  
gtttagacaaaaactccttttgcgacataacgaataatattttgtgatctactatttgtatatactattttaaatttcttctcataggt  
aaagcttctaatagaagcaagcaccgactactattttcattctttcaatcctttcaagctattttagaatcagttatgtttagccaaaatgtt  
ataactttgtaaatgtgatgggttctctaggcttctactgcgcccggcttcaatgctgggtttataaaataaatttaactatggaatatct  
ttatttttattaatagttttactgaagtttgccttttagatcttctgctcaaagtttgacactactctacggattctcactttactaagcagaaa  
aagtaaatgttcttgggttactttcgaagctagaacaacctgaagagtagaagatggctaccaagttacaagaacacattttaactgtc  
aattttctaattggattcgttatttctgactttgtcgcaaaaagcaagagtcataaagccaattcctgctctataactaagatacctaataagat  
ggtatttataaaaagacgtttctaatacaattgaagatttaacagatgaagaggatgggaacggggaagaacaagaagacatacatgtttctc  
ttactatccagacaaaccgaccattcaactcatagacaggatcatttccggagctgatggagccgtgggtgcccataaattggtcaagtcca  
aagacgctttatggatgatgccacgggtaccatgaaatgcacctcagctgaagacgttctttgttactaaaatcatcggactttatagctcatga  
ccttgattatgcctttgatgattgtatagaagaagatgctcaagaagcagatcttcaaatcaaaagtttccatctgaatttagtcacgagctaat  
ttaaagaatggttcccattcattcttcaacggagttccgtttataaaaggaaaaatctgttgctatatagtcaagagacgacaattatta  
cgatttcttagaggatgacatgaaggaattcctgctcttttgcaggatttggatccaaactttagagtttctgatcccaattgtatgtatattt  
ctattataacttgaccatctaacgatattttagttgttttgcgcttactgttcaaaaaatcgccttggctaatgtatattaatcattctgtgc  
aagaacagacgggttgccttggctggacagagttatagcgaatggacttgaagcagaaggtccagagattcgattaattcctaagggttagca  
tgcttcttctggaagtccaactttacccaatcgtgttccattcgattaatcgtgcccagtcaggagaaaaataactagaatttcagaaaa  
gatgcaaacctggcttcagaaagtgttagagatgaagcataagcaaaaataaataagggatataatccaagggaaatcgggtgtttacaatta  
atctcataacagttatctgtttttctattatgataaactaagtttagtctatgttactttactttaaacatagcttgcctctagtagtattat  
acatgtacattccttccaattttgggacttttttccatccactgaacgctagataccgatggttagttcagccctcaatgaattccatacaaa  
gactcaattctcgggttagtgattgctgttgacaataaactaaacgatgtatgaggaatgcagtaaaagccatactacacataacgatggttca  
tgagtcattaaaaccgttaagccacgacataagatctttctcagatgtttatgaggaaagcttgcaggttcccgttccctgctgctaccaagtt  
aatcgccttcatggcacaatggctgactgggttctttgatacatttttcatctatagaaattgaaagaactttacgtgacttagatcataaactg  
cagcagcacagccaatttcttggattgagactcaaaagccatttaattagctcgtccataactccatcaattacttccaaatctgatctgta  
aaagtatcctgcttggatgcttctgtaaaaaacggccatagggattccattcctgtactgttctcagttaatggagcgtgaagaaggaa  
ccggaaggatataaaccttctcaattcctaattctgtaggtcttttctatctattttgagacattgcagattcaggacatactataattttag  
ttcaagggtcattgtcctttgtattcttgaagtctagcgaatgaaatagagcttcttctgtttatttctattttttgacatattcagttgtttt  
gaggcaaacctgcccgttcaaacgagcaatccaaacattttctattacatttagtcaatccgtaactagaacctcactgcttcaaaaggcctta  
attcaagatgtgattttactaattttaaaggcagctcgttcttgaattttatctccgttggacttctgatgaattgacttgcattatatttt  
acaaaaaatgtgttatatgaatatacaaaaatcacctatgaaaaagaagatgactgactaaaattgtttctgaagaatattcttacttttga  
aagtaccttctgttaaatttctttaaactgcttttaaagcattaccaccaaattgtatgaatagttccagaaagcttccctcaactgaaac  
actgattataaacggagaacaattattttcatatttcagttctacatacctttaaataaaagtcacgtcacaatgaatgcccgtcgttaattca  
caaattttcatcaaacagtcagtgagtaagtaagtaagtaagtaagtaagtaagtaagtaagtaagtaagtaagtaagtaagtaagtaagtaag

atTTTTaaagccattagtagctcagcttgctccccattgtagactcaggcttaagtcgatttcgaacatgagaagcagcatcccctaaccatga  
tcagaagccatcgtgtggatcatatcctaacgaagtaacgcttctaattcactggttttgatcaaagacaaaggaagtggttctccgata  
agcttgagtagtcgaaattgactaatccacctacattacctaatttctagtagtaataactttatgaaataatgcacatactttctttagagatg  
tccttgcgacctgaaatccgatattttagatccgaatggaattctttcactcgttcaaccgcttcatcttcaataaattatgacaaccaggtgaag  
gaaaacttgtaattgatgatcagaaagaagcttggaatcagagcttttgcgtgggcaatttcattccttttgaatcctagtattataaattaagc  
gcattttcatcgatccaatatttccaaaagagtacataaaactcaggtttatctaaagaatatgaaattaaatcttccataaatccttatctcc  
ttgctctttgacatagcgaatggctctaccgatgtcagacaattcattgattataagcatcaaggcatctttgttatttccatacgaaccaagaacat  
aacaagctcatcaagataacggatatttacacaaacgttatatgctgtcccaaagaatagcactgtgtggttcattaagaactcaaacagccttg  
accggtcaaattcagcaaaaacgtccactttcaaatcaccatattccatgagcgaattcggaaacataacttataagagcaaaaataggcatat  
aaaaacttgtaatcactgactggatctgtgtataactcattaggtggaaaagaatgtacgtgctgaacaagcatgtttatgacttttggattaacatt  
ttcaggacgtccatcggtgaaataagtaatagttgtaagatcgattgccttctcaccatataagttgttgtaaaaaacaagatcaatgcattct  
tcttgtttaatttaaggtatagccagaatgcttccacaggcatactgtcgtttacataaagaaggtaagctattggctagctctctgcttcttgg  
tttggctgacttttctgtgctgctttgcaattgtcggcactgaatataagttgtcggccaggtatgtaacttctcatcaaatTTTTctgtaaa  
ggccatgtaatatgcaaaagtcttctgatatataacaggacttaaatgatcatcacaagtggaaagatactcagcaatgcttctaatacgttatg  
gtccgcaaaaacaaaatccattgctccagccactaggattgttactgtataaagtagggattaccaaagccgttttctgatattgctcattatca  
atataatgtgctacataattttgccaagttcagggactgcaattctggaggcagctcttcttctgctcagcaatcgctctgctgattctt  
cccagaaaacaagatacatgacgtgatcaatctcattcctctcttagcacatataagatcattaggaaaaggacatataaataatcttcttctg  
ctggatctggaatcaaatgataatcggaaggctggagacgagaatagttagtcagtcgatgacatcgccagcagcttgaatgaagagtc  
tataaggcgaagctccggtcgtactgctgctactctttgggtctagaagaaggtaagcttctacctcggcgcgtaagcaagaacaagaa  
gttggaagccaaacatcatgataaccactgacaatagagtcgatttctaaaacagcctgactgaaacttttggtaattcatttggctgactgagag  
ctgaatggagactatagatatttggctcccaaccaatatacagtcagactcagattgccaatacagttggaaggaatacttcttggtagg  
aagctttttgggtgttccaagtgctaaagattttccatattcattactatagataaacaccggaatcagtagccaagcaacgtaagattgt  
accaatctattttgtataaccgttccgcaatcaacctgaagaataatgtctctggagcccagccatcctaggattatttagcacaagatctggagt  
agtacgcgtcgaatcttataccttttccgacaatagactttgcctgctcctccacatataatttgacgtgaagatctggctatagtagg  
gatcaatcgctaccgataatagtgccgtttaaagtcataagcattgtttctttagagctgatgttatagacaattgcttccctgtgtaagtgtca  
atataatgttcaaccttataaacaataaaaacgaacctccattgaacacgatgctaagtttctactttcaagatctacagaaagaccagtgacc  
gtagcaacatgtaaaatcattttcgaagtaaaaactcctgtcgcgaataaataaacagcaccattatgtgatccaaaaactaaaagaagaa  
actgtaatccctatacattgttgaaagaaccacctacaaggttctttgaaattgcaaggcggatatagaatcgttcaaaaacaacttga  
aatctgtctgtaatctttcatagttcaatttaggctcttctgcttcatccgacgaagttaaagtgctacttcagactcggaaactggttactaactg  
acatgaagtatacaaccggaggccacaaaataattaatgtagtgctgtataaggtcttgttttcaagttccagactttaattaattaca  
aacgactgaaaatctaaattgtaattatataatccaaaatttgattgtaaatagtagaggtggagagcaagatattgctttagtcttgg  
aacacctaagcttttaccggagcttcatatattcatttaattataaaataaaggaattgaaccttcacttacttgcaggatagcaaaaat  
aaaagcatatattttagatctattagaacatgtgcatgcaactcatcaaagaaaagaatgtgttttccaacattaggtaaaaataaagagtataga  
aagcaaaaactcgtatatagataggtgggcatacaaccttacttctgtaaggagtatttgttctgttctcagcaattaattaggagaaaag  
aaatcgggaaaaaaaacttctgataaacagataaaaatgaaaaactgacacaggagctcttctgatagggaaagaagtaaaagaaaaaac  
aaggatatttaggggaatcgtattgcatacctcaacaagttttccgtatggaggctgataggtattttatttcttctttagtatttttgacatt  
ccaactagttttgtatcgtatcctgctgtgcatccacctgattcagcgtctccggctaatacagcagataacacattgttttactggattcttga  
agctcaccagctagtaatagttcttctaaaacatagtaggccttttgcgaattgaaaattaagtccaactcgaaacctgttaacaaaaaggtta  
gtaatggaaagactccgagatttagaatgagcacaattaacatacattgccgaagtatttgcaggatctcaacatattatgtatgacttctaa  
aataatcaattcattatcctgctcgtatccacaataaagaataaagatgcatatcgctgtaaacgatttttctcctatacagcgttagtca  
actcaattcaatacatcgggacataaattgcttctttaccttatactctacaaagttgcacatcttaggcttgcggacaattactaaagaagaa  
catcacggataatttcaacctccttctcgtcggcaaacgtaaaaccattttgccaacgaactttccttggcgacttattaatagaaaaactt  
gatgccatagttgaggtttatagtttgcagttcctttgcccgataatttaacaaacgctgattattgaagggaatcgaattgcgagtacaaatac  
ttaagtaactaaaagattaatttctgttttagccacgatttattagaagaatgaaaagttttggaaaaggtttgctacataaccagtgtagctt  
gctgtatcagacctttaaagataatattctaattgggttatttccaggttatttccataatgtgaatatcatattcataattatagacaagataata  
tctatataacattttgtgctcaaaacttagtttattataaaaatgaaatcttttagcctaccatagtcgcttacgaccacgcaggcgaacctctt  
cgtagcgtcgaaggtaggtttgattgttccacttttagcatatgcttctaaaacataatgaaactgagattgtagctatcacaatgaaagaa  
tagaataaacttagagctgcactatctgggagggtacttagctatagcacgctctaaaacgtataaatcaacggcctgtcttctcagactcc

gaaacacttcctagtcctcaaaatcaataatacaggttctagagttcaatagagcggaaacatcatgttactgggtgtaagatcacatggacaat  
gtcattcatatgcatctttgcgacttcagatccaatgattttcattaaggcgccagcgttctcatattcttctcagagacaagttctttaaagta  
atctcgaactgaaggaccactgatgtattccatgaaaatctgtccacgattgggctcaagaaaatagagtaacgggcaattcacacctacagcat  
ggcacctagcctcaaaagtctagcttcaactaaacatcttttctgtgaagttctgatcaagtagctgatgcctccatcgtttctcaggacgggattta  
gtatgcatgggtcaccaggatagaattcaattatagttataatggcttctgcacctgttttactactttccacccttttctcgaatttcatgatataa  
ctgtccacattgtttccgtaaatcctgtttgtccgtcatattttgacgttctgtcgatttcacaaaagtcgaatagaaagagggtgatcagaagc  
agaaaagatgttaccagctatacagaatttctatcatttgaataaaagattcaaaaatatttttctattaccttttctaatttattagactgtaa  
agttatgaaggtaaagtagcataattgattttattaactgacataatagtaacaactagacgatccaattaatgaaccgtccattatcatcata  
ttctgtttgaaggctcttagattcaaaaaattcaactttgtcgcgcacgctcagactatgagtttaaacgacgggtataaaaaatatttcttagtt  
gacagattcagattcgttcatttcttctgagagtagcccaaaaggaattccaaaagattgaaactgggatgttctaagca  
accgctttcatcaataatggtttcaaaaaattataaacttataatccagcttctgtataagaagacttttgaatttaaagtttttctcatt  
ttactttcacaattataacatttaccgactccaacgactgaagaccgatgaaactgttctcctcaagtccttcagcgtccattgcttaccagc  
atctttagtaataatacctaaatttcttagaaatgaaacaggaatcttgaattctttatctgaatcaagcaaccgactggacttcggcatctt  
caatgtttaaattcaggagacatgttcatcggcaaacacatttgcacgtaataacagtagtaaaaattagtgaaatttcaaaatcaatgtt  
acttttacctgtctcgcgcttccattttctgttcacatattgatggctcatcgtgtaaaactagaatcgagagtaagagccatcgttacctca  
attagccttttactcttttcttctactccacattgatagtgtaacatcatgcttccactgaagaacaagaagcgttgaactgctgtagccgtc  
tgcatatcttttagtaaacgaagaggagatacattcgaaggtccagaagagaaactcttttttagattgactatagaataaattcaattttac  
ttcagcatcctctgcacataaagaagacgcccattcattcaaaagatgttcgacgcttacgacgttgctgtacacctgaacaacatttcttaatt  
taattgctgcaaaagtttataacaggaagaggattttaaagttgatttaattcttaagacacccgttctcctcatgactttcagctggattgaa  
ggttctgttctcgttccatttctgaaatgtttacaatttgcctgttacgcaaaatctgaagactggtattctaaattacatattttgagattcgc  
ataggaattcaattgaaaaatcttctgtaataaacgttcatggcaagcattcatttattttgtaactctctcaagaataattgatggcggtg  
gaattgtagtatgcatggatattcattcatggaccaagaagaataaaaataaaaacttactcccaggtataaagatatttaaatattagaa  
atcaactgttataaaaagtcgtggagtagtctcaaatgaacagtgtagcagttcacagagaagggaatatacaaaaaaacctta  
cttcggttctattagctccttccataattcacaataatcttaaaacttttctgtaattacagccattccttaattctgtgtgaacgaaacc  
aagggttggtcaaatgtgaccccaatcttctggctataaacgaaaaactataaaaagctttttctgttataacagaaagaaaaaattgaga  
aacggtgggtggacgggtgatcaaaagcgggaattgcaattgattttaaagagagaaaaactgttagcaacataactgcaaggataaataaa  
gaaagaaatgataataagaggggaattaatctgtcgggtatataataaatgtccatttttcaattttggttcaagataggcgcaccctc  
agggtgtcaaaacctcctcatcacctcgaagactttggaatcatggacaacctttccaccactgaaacttttgtttggaccttcaatattgc  
taacctttccgggtgtttgtcagtaaacggatgttctttgaccaagatccaagagcatcgagttgcaatcgctgaagaacgaccgtcagctgg  
atgttgaagagaaggttagcttgacagtagcttaccagatcttgacagattatagcttcaattttcagacaatcaatgctcagacctctt  
gtctcagataaataattataccatccccttcttactaatgagacgagcagcctcatccaattgttctccacaatcgagcagcggaccaagctg  
ttcaccagtagcactctgaatggatccgtactaatggcgtaaaattttcttctaacctcctccttttctcactagcaactaaagcgttgc  
atcgacgatgagcttttcttctggataatattcccacataagcaccacgaatcatgctcctcatcagttcacttctgaaacctatcga  
ggcttctgatcgaattgttcttcaaaaacaattgctaaatgcttctgttctgttcttataataatttaggaaaatttccgttctgtcgtga  
gtaggtattctagcacgaacaatacatcgtacgttcggcagctttcagcttctgtagttatttctccttggctcctaactcctcctgggcttaaga  
ttggtagttcacacaaggtgatcaataaatctctgtttttggacttttctgttggctttttgatgcttcttcaacatagctttaaattgttttgtt  
tggctaaatttttctaaattcaaaaggattcatgcaaatgaatcgttgattactcaaggcttcaataagttctgtgctcgtaccatgcttgt  
cagatcggtagcatcaaaagataaccgaaagaaatccataaaaaagaataaatcaatcattgaaatgaaatagatgttttataaatctaaaaga  
aatgtattatgaaagaaatccagatcgcagcaagtagataatattatgaacgccccatgaaagcgtagaaaatattcactttacaagttat  
ttaataattgaataaactcattatctgtataattggattgttacgagcactagggtgtagtttctcattatgattcccacggcttactctttcga  
catagacggatcagaaaattacgcttttgaagaagtctaatcacattatcatcttctcgttcaaaagttacaaggatataataggtacggta  
gtgtcgatataccataaacatttattgtccctaaataaatcttttcttcttcttcttctgtatcaaaagttgaaaacctaagctatacaaaa  
acagatctataaaaaacataacttctcgttaagactctatagctcgttaattatcaagctgcatacgaatcaattttgaaaactgggtttt  
gttctttagaagcttcagcatccttctcggtaatccgataacctctatggcactctgttctatataaggttagcaggctcgtccaagctggatag  
gaagttagggtgagatattaggtagcaataaccatttaacatttccgcttcaactccgacactcgaatctctgtagcaaaagcgggattaaagta  
ctgtaaaaggtccattaataaaaccaacataaaagattcatctatagacccaatgaaactgaagaaggaggtgagaccaatttaagaagga  
gaattgaattgaggtaaaacaaaagataaattctctagcatcattcattgtcgcattaccaaggtatttcacgatattaaacagcaaaagga  
aattctcgaatccacagtttatattgtacagacgaaacgtcggcaccacagccctcgttttaataaactactcaatggactttcagcaattgca

aagaacactccctgggatgctacctgtccgctcctgctggatggaagaacaagttaccaaaaatgagagcgtgcatcagcaaaaataaggct  
gaccgtctattaacaaagcgtgagaccatgaaaacaagcgaacagtttcaactgatgagtgatccataatgactaatataacagattgc  
agtcctttaattaattgggaattaactataacgttctgaatggcatttaataaaacaatatcactatgacacatctggcgttggtccgtaatggcatg  
ctgaaataactgagataatctacgatgacacatcgataggattcccgaacaaatcccacttcaatattcactttctgattcgcgttcgataatagc  
ttattcagaccattgtacaaaactgaagtaaaggacggtaataatcatttgaagccattatcaacctcaacaaagagaacttatcggactt  
agcgttgccatgtaataaccattagtatttaagcgttctttaaaccatccgtaagaggagctgacattgcatgttgtaaacatgaaaacc  
aaagctgctcgttctatagataaaatccctaataataatgaatcaacagtatcatttccaagggactccaaaatccaattcataatgctgaagtct  
aagaaggataacgtactatcctcttaacaaaatcaataaatgaggacaagaatatactccatgaccgaaggagtgcagttgagcatctagcgt  
agagagagcatcattagcactcccatactgctaactattggctcaatgttaccataaacggatagcatggccttagcaagggtgtattgtaaaa  
atagtttttccgtaaacaggaggagtaattcctgtgtttttaaagacattgcgttagttcgttgaatcttcaaaattattttagcgttca  
aagactgaaggatcataggtcgttattgtaaatgcagattggataaggatgaagacaatctttaaaggatctatacaagttctttgacta  
acacattataaattttgcaatgcaactgaatagctgcaatccttaccgcatgagcggcgagaacataaagatccgcttggatattccaata  
attcagggtcgaactgtaactggaagcttaatagcatcaataacctttccagaaatctgtctctgttgccgttcgtaagacgcagacca  
aaaatttttgataaaaatataaattcaataataggcacctgttggagacatcattaatgaaaaagttatccattcgttttcagccaaattaata  
aggcttctgacgttatttgggttctcattgtgtctaaactcttcatgtttccaaggaaatttcttgcagagaaaagaagcactgccagcct  
tgttctgtcctttcatgattgatgacaaaaattccaacacatccctcgatataactgaaatgtaggattttcaataaacgtacgcatacag  
accaacgacgtcggtaaaattgaccatataagctaaaagagaaggagttcagaaggccaagggaagaattaacgaagtaagtagtctga  
gaattgaacctacacatggataaatctgaggtaaagcataaaaaagttgaggtgaacgagagaataagtcctttctaattcggagggttaag  
gttataaaatcctctcagatcaatcaaaattgcatcgtttctaaagacgaaacaagccagttcttagcaacctccgctaacttattctgtagaa  
gaaaatattctgtgtacaaaggatctatgcatcaaaaattgaaagtaaggatgcaaatagcgttggcatctgtctgaacaaaaatcttgt  
acaacgtaattcctagttgtgtaacggtaatattctttatttgggactttagaacaaagtaactcgataccatataatgacattaagcaatttga  
attagacttgaatcgacaaccaatttcatactgttggatgatcttagagtatctcaatcaagaaagttggcaaatatttcgagaaactga  
atagattgttagcgaactcacttttaaatattggaaggtcatcaggaataacggagcgttgatgcaattatcgagtagtaattcgtaaagct  
caaagaaagccaaagtaaaatcatataaccgcttagcgttctgttcaaaaataacattacctaagataaaaacctttgtaaagagcgcactc  
gcatatgccaaaatgctagttgggtcaatatagaacaaatgcacaaagaagctgacaggatagaacacatattgatattcagatcgtcagact  
ggaattgataaatagtggtctaaaactgcaataaagatcgataaagtcataattctcctccaatgaaatagaaactaatcgagtcagttcag  
aatttcagtagtgttggattgtacaaatcaaccaaagcgtgcaagaatgacacaaaaactcatcatgcagatgataaagattattgttacgat  
atgctgtaaagatataccaatacaaggccaacgtggataaaccacatcccacatgacaatgggaggggaatgatctacagatacaattcttctc  
tagtaccttaggaatagccttctcaggattaggaagaaaagccagtttggcctcaaaaggtaatgagtcctgagttcaataagaacgttctgtg  
ttacgttcggctcaggtataattcataagattgaaatccctcggtaaaacttgagtaaaaggtggtatttaaattaagtcaggattaactggacg  
ttgaaggttaacgaagaaaggacaggagtgagcaagagcgggaactgagataattcaaaagggaatctagctcctgcataagagaatagat  
gagctacacttgcataatcggaacacatctcaaagatttgggtttttaaagagtggttagcacaataatgacagaagatgagaactttaca  
taggaaatagctccgcaataaaacagccaaaataaataaacatcataattaacatcatcttgaacccatttaaaatagaatgataag  
agagaaagggtaagctcaacagccgagataatcatactgataagaagctcggggtttttaaagagtagtgagaccagccttgagttt  
gaacgggtccttagatttccgggactattgaaggtatgaagagcaatacccaagtcagtactactgaaccaatcgggtcgcaagaaaa  
cttgacataatgtcttgaattttcaaaatacaatctccagatgtcatgagaaggcatcattcgttggaaacggcaaaaactggttctaaagaa  
atgattgtactgaaatgaccgttgcgagataagtaagcttattgcacaaagaaaatcctgtctcatgtctaaatgcatgaactcttggatgca  
aaaactggtttttcatgcaagaaaaccaagcaatagctactccgatgtgcatgggaggaggaatagattaaaaggaacaaaactcgaag  
taattcagttgtaggtggaatagaagaaatccaatgagctagagtcgttctcctagtaaagtgactgaattggagcagcctgatcggaga  
gttcattaaagtaggcgattaagcaataataggcggacggttctcaggatttgatttcttggattgtccaagttgcaacaacctgatttt  
gaagctttataaccagaaatgatttggatctgcgcaagcacgaagcaaaaagacaaataccttccaacaagaaaatagctcagcataatcgc  
tttgaattcctgaaaggaatgcatcatcatttgatgaaagagatttaagcataaattcatcgtttaggagagaatcacatacaggactt  
cggcttcatcaaatcctgtaagtcgataaacctccttgcaaatccttttgagacttttactgggtatgaatgtttatatacagacaaaacgca  
tcttcttctttttagtagcttttgaagcttgcacgcttcccgaaggatcgaaatgtttggaatgcagaaacctttcagctaccaactc  
tcaaacgttcttgaatgcttcttattttagcttgaaaactgcttaagatccaagccaagagctacacatttagtcagtaaattgaacacaaa  
aacaatcttgaatcaagacaaccacatacattaggagtcacccatggaaaaagactgacgaaccgacaaactacaaatcaaaaa  
gaatgattcaggacgaaagttgattcgttctaactcttataacgtcttcaattgttcttctgtatgggtttgcaacgagtactactaagtcg  
cttaccataccaggaatagtgccacaatgtaagccaacgcccgttgaatgattcactaataacaaaactatctcaaaaattcgataattg

aaaaaacgaatttacttgcaaacatgggcttcaagctgccacatttaattggacttcttattgaaaatgagagattgcttctactaggttacttctc  
tgtttcttttagttgtatatttacaggtaaagctccaagttttacaaaacatatttgaagagatgaaagacaagctttatagttctttaacaaact  
aatattggtacaacaagtgaattgacttgaatgaaaaacgaaatcactcgttttaaggaatcattgttttagtagcaagaaaaacgccgtc  
tagttatttttaggaataacgaataataatattatggcaataaaaactatattaataaggaataaaacgtgcacgggagaaaatctcacacg  
ttatgagaatgaaatcgagtggaagtaataagtacaattcaaaaattgtctattggaattggacgtgttagtactcgtagagtaatagtaatat  
gtccagggatctgattaactaaatgaaaacgactaagtgtcaatcttatttagcctgatcagcaaatctccgatcaaaagatttcgactgtcgac  
acacatatataattattctgtatattgcccactgtgactggcttctctaattaatagcaataatcacgaattgtaaatttaacgagatttctgcaa  
tcaaagagaaatttgcaatttcaaattttgttacttattatcaagcacaattctttaagcttatgaatataactgatattagctaataattccattctt  
ataacgaattgttatattatgaatgctaacgagggacccaattatgacaaaacgttctgtttgtattagaaattgatttagaaattgaatgaatag  
ttcatcttattacaacaaatagccccagataactaaaaaatcttaaccacaacgttaactgaattgacgactcgtctttgagatattcgaaaagt  
aattttaaaagggatattgtttatgaataatggaaatgctaaagagatcgcgttctaaccaatatacttagagcttaaggtttggcaaacag  
aaaaggctctaaaacaaacgagccttctgcacgtattcattctgactataaaaatcatccattaggagtttcttctactgctcaagaataggagc  
tcaattgctttttctttttaaagggatgattttctcatagggattctaactgataatcacttctatgcaataacccctcgtctcatggcca  
gtagaaggtaaaaaaaaaagagattttgtattattgttcttattttcgccagacagaagaagttctggctgagagaatccaactcaaatcc  
ctttctaaaatttcttctgttctactgttataataccttactttgacattccagttatccccaatccattcgttacgctttttacgactacctttttt  
tttttttttttaagcttttgcttcttcttcaactgatcatatcttctcctcaccattcccatagtcctgggcagtcagcaatcactactccaa  
ttaagaatgcttcttacgattaactgaggataagaacatccccaggacggataatataatgggaaagcttttgcttaccggaagcttggga  
agaggtgctagaacaaatttctgttggtgatgttcgaaatgctgaatgaaagcaccggaacatacatatgctgggtgatatactattcaagaa  
gctggtttcttgcagacggatagtgattttctatacttaatgaccttgcgcaaaaacatgtcctgaatagcatgctgtattgaccagattaa  
tacccttttgttgagctccagaatgcttcttggtttaacaagtacatgtggttaccgcaggaaagcgggataccccgaggtgtaataattatg  
gacactatcataaactatctatttctgactaattttacaatccctccattgacgaattcaaaaaggagttagatactgatttgggaaactggat  
tgcattgacagctccttgaataaagaagtaaaactttatggcgaattctgtcgaggttcttctgtttttagcgtcttttccgaaagtctatatgt  
aaatgatgacagatctagcttctgtttttacattgcagccatcaaacagacggttaacattatgtttgatattcttactaaacacaacaa  
tgcgtttcaacacattatgttgaaacccgagttgttccatccaatcaattttccctacacatgctgtaattgaaaactctctatctacattgcttgt  
gattctctgaaatgtagatttcagctgttacctgactttaaagctttttcgaggaaataatgtgaagccttcaaccaattttctcgttgggtgca  
agcttgcactccatgctagatttccaagttattatagacggaataagtcgattactatatactccaatgcaatctgacattcaaaaaaggaatctt  
tggttatgtatgattattaccaatggattatcactgtgtatgtaatagttcagtatacaaaaatttctgtttgttctgatagaaactgattgtgc  
cactgatttatttttcttagtttatttgagcttcgagtagcttgaaaatccccggtacaatcaatcatctgagattgtgtgcatgattttaaactg  
ttattaagtgagccccgttttctcataagctgaatagaagatttcagcaacatgaggtttacctacaaatagagagttcctttccacgatggttc  
atgtctgattttactgttattgcaatttcaatattgctgacgcaatgagagattgccagtggtatgtaggagattttatcagcgtctcttctgcat  
ctttccctttatataaaagagataaatcatagcctagcaagttacttttaaacgttttccaggagccttcaacctggatttctcgttgcacaacga  
aaataattacattattcttgcataatagttggtactatcagcaacatgctacaaattcattttctgtgaatccgttcttacctatatacccttctcatc  
tattctactatgtgaaacgcttaactgtacgcatttggggatataatgagagtgagacagtagcaagcctcaaccttgaatcgttattggagtt  
gtaatggtaaaacctattccagtagagcgtttgatgctatactattgacgttttctgtttatcaaagttcaaaaagaactttcaaaaccgacttt  
gctgagaaggtagctggtgtaaatcccttccgctgtatctgattcaaaattgaaagacgaaaagatcaactacgaaaaaacattaaacctgg  
aattacgggtgtaataataggatagctccgccagattacggcacaagctgcatcaaaaattggctgaggtatctagactccttaaagtccaag  
aagcaaaatctgataataagaagccgaaaaggaatgtgttgctcatgctgactatagctttaaagcctacgcaacgatggtgggatagttg  
gtcgtcaaaagatgaatctcaaccgtgcttaattgtggttaagacctacgtccaacactctctgaaatgaagcaacgactgtccacaattga  
aatattatctacattaaggaatcaaaagtttatcgacaacaaaaccatcgttccatgtatcacgatacagatagggagaaaagacaatgtg  
agtactcaagcctttgctggaatctgatatacatttggatagcccggaacgacaagggcaaggtatatggacgaagacgaatgtgaacgc  
tatggcatcaaccgcaacaaaagtgacttaattgtttctcatatctggtttaccgcttggggaatttactctatggtataatactattcttattga  
ctatgtaacaaaacaaaaattatattacttattcttgttaaacttgcataattcattcatgtattacagtttattgttattctagactggtaaatgt  
agtgtttcagagaaatattacagagcacagtaatgcatcctttgcctttatataacaaagctaccttaagtttcaaatgcatcctaattggatattca  
tctcttctgaccaatagcacaacaaaaatttataattaccgcaattgtacaatcatcttctgcaagctttagaagatctggcagcttac  
agtggtttagccttccgggaaagaactaggcgggttcttcaacataccaacttcaaggaaggacatggaagcgttttcaaagtataacgc  
tgacgagaatactgtcatcaggagaaaatctgcaggatgggaagagacagtggtttaccatttgagcccttttttaacgtataataacgct  
ttcccttctgctcaataatacatcaaatgcaatttgaacaatggcttttcttccgtggaaggatgctggtaaaaggatgaattgaagttcaaat  
ttttacagacgggtgactaccttgcgttaccgaaaagaataaggcaatggtagcttgaattacagcgtgctagtttttaggattaccg

tacattcaaatgcgttatacatagttaagccaacgaaattaaagagtgcaaaaaattcatgattcgaaaacaaagtagcgtagtgagctaatg  
gtaaaatactcgaagaaaaacaacaagatctatttagaagcagcgaatttcaaaagatcttcttctaattgtttaataaatacaattttttgct  
taaagtctaattataaaaaaataatttatacttgtttacaaaatgaaacgtgtgtttcatggaaatgatactaaaaggatattatattgga  
gaacgcaatgagtcagggtaagtatactgccatgctggaatccattgactctcaatattatattacttattagatatacaactaaaagaaagatt  
ccagcgtgtctggttggcgaagtaagctgcaatagtaaaacaagttggtagcaaaaccttccaatccgatacttgtttggaaaatgtctcatcat  
tacatagctgttctatgtagtaaaaaataatattcattaataactatatttcttcttgaatctgttttccaatttctttaaactctttaaac  
accatattcttgttacttctgtagaagtatacatattatacataaaacttctcatgagtcataaacgatactatgatacgcctacctcatggat  
atgttcgactactttagtaaaataaaaaagtcaaaagtaattgattgaaagcactattctaaactcaactgaagggtgaaagctcttagaca  
ggaaattccctagggttacattagaaagcaaagtaaatctctgtttgaggctgttaccatttaataaaccaacacaaaagttgctgaaatt  
tctctcagatattgttattattggtttctttcaaaccgaaaaataaagaggatattcccggattctataagtaagaagaaacccaa  
aaatattgtttcatcgattatgattcttggcgaatgtagacgattatgattcttgggtgtaggaaaaagagcacaacgtctaagaatttcg  
taagctcaatggtaactgaaaagaatggtaaaagactctcgctatcagtaatcgatgcgtattctagatggaaaatggatcaaattctaacc  
aggattggcatactaatctttgtatgcaaaaggaactttacaagtttcaaaaccttctgctattgcttctgcaattttatttgcattcga  
ccattgtagcaaaagaaaggaatctcaactatcgctgaattatacaaaaccaggtatacacggcttagaagaaacaaaatgacgaatagag  
gattgagaaatcggatataagccttcatgctacgtttgtcaagttgactcttctgagggtgtataatgtaagcaggcaacgattagtaactttac  
agtaacgcggtgaaagcaacatctcagaatctattttccatcgaaaatgctgcttcttcatatgtctcataatggcgctttcagcgactat  
gcttcaaaagcaacaacgtgcaagtttgggatcggttactgtataaccctgcgtttagtcagatgagtcctggttctttatcatgaaaagtg  
ttagaagtgaccctcggtagcagattatgattctgaacactgcgcaaatgacaagcattgaagaagtaaaccttcagaagaactgccat  
ttttaaacaaggtgaaagcagatcaagcattgtaaatgaagcaaggagacaacataaagaatcaaaataaaaattcagtaggcttccagg  
gaccgtaggggttcaattatacttctgtttctaaccgatccattctttaaaattccaattataaagcaatcattctcgtatatacaaaaa  
caaataggatgattcgttatgactattcaaaaaagaggagaaagttgaccgtaattttctcgtttacaaacagcctaaatagaaaattc  
ttttactttcatagttgaaggagtaatcatattgtatacaaaagtgaagataatgaaaaagcaacttttactatttacttcaaaactgcacaca  
gaagaagactttaactttcatacaacagagggtgttggtcaaatcatcgtttaagcaaaacacaatagaaaactgaattagcgaatttcatt  
ttgaattactttactattgaaaattgatttatcgctcattgcaatattgtattgacgttggaaataaaggatgaaaaagaaattgggagttgag  
tattaaagcaaaacagcgaatctttatcgagtaataaattatggcgcggaagagcatcttttattgttgctatttgatccaatctaagaaaa  
aggctccagtagatctctacattggttcaaccccaatccaattcgagtagtagagaaattcaaattcaatgacgattcaagtcagttatta  
actttgaatttagcgaactcgacaacataacggggaatacaaggaggagcctggaaaacgagaatggacgaccatggatcgtactttgtctt  
gttcatgggtttctaataaaatttcagcattacaattcgagtggtatcggcagcatccaatatttctagacatactaaagacaaggaagcaaaa  
ataaataaaacaccgagtttaagcaactcttagttgctcttcagcaaatgtttcttgaacggttggaatcgatggccttgaataacatttt  
ctctcagatgcattgaaaaatggaaggcaatagcaagggaatacctctgtaaagttcaccatgaaagaaggaattaatggactttacc  
ataaggcttgaatggaatcgacaaagcctcagtcgaaaataacatgactcgaaaatccatttggatataatgcttttgaagtcgatgaaa  
gggactcattgcttattgtctatgatgattgtgatgaccagccatacaacatgcttggcggttcaatttctagagaacgaaaatcaatctta  
ccaatcgtcggatgattcaatgtttacgcttctcaatggagtaaaactcattcaagcattcaaatgttggaatgaatgtcaacgatcacg  
agaacgacatgactgatcaagaataaagaactataatgctttccaaccttgaattataattataagaatggattaaggataaaaaggttta  
aaaattgtcacaacggataaccaacatccgtaggaccacttgcataggtacaatgtagaggaattcataagtcagtaacttttcaattac  
atgtttttattttgtagaatgcagaattggcgctcaaatccaccagcgccaggaacccagctccaattacccttcaatagtttcaattgatcaa  
gtaccttagattgagctcaggttcaatgtctactttgtctctgctgtagatattgaaggagtttctaatacattgaaaatggatcgcaattcaa  
ctgaggatccagtcgagaaaggaagttcttgaatcggaacatgtccatagagatcgtcaagagcttatcgaaacttcttagcttgcg  
gtttccattttgaaacttctcaccattctggtgttccactccccggcaacgtctccattagcaaacgatactgagaaggtagggtaaaagg  
ctgaatcggagaccattgtctgagacgactgtcttaagtcattctgagaagctttactcgcaactgatgagtaggggtccacaaggagatgttg  
aatgagttgaggatcaaatcgcggtgaaatacaactaccacagctgacccacgtcaaacctgctaccaactttaccttgagcagcaciaa  
tgagcaatcgtactcaagttgtaattgattgtttggaaaacaggtcagttgtggttcggatcgggaccttaacacaaaattgattcagtgaca  
aaaataaagaacttataaagctgtaattcattgcagcggagcttcaagccctgtttttaaacttcatgcagcttgaattaaggaaataaattt  
gggatataatccagtccttctgtaactttggttgatggtaaatagctgttatctactgaaatgatgatgctcaagcttgccattctcaggttctc  
tccggaattgaaaagtagttcaagacataaaatagagcaagctggcaaaatgggttaggactttgttctcgtctctgttgttgaagactcg  
gattggggaacaagaccaatcgactttgtatgaccattcagcatcgataaattgagggttctcacataaataagcttggcggttttcagtg  
agtcgtcgtagcaaaactttggcgtctaaaccgacaacaagcccgtatactgaggatcaaggacaatgtatccaccgctaagcactttc  
caggagatgagcaagtagtactgaaatgaaagattcaccgaagattttacttggaaacgcacataattcatgagaaaaccgagtaacgt

aaacagattcgacacgtacgtaataaatgaacgaaaacaaaaagaataatgaaatctatggagtatagaaaaaccaaagaatgaaat  
ataatgagcaaaagagaccttggtttctactaaaggtttccttgataacctcgttacgattatatacaaaaatattcaaggacacaagaatg  
gaaatggaatgcaatttcgtttcagaagcagatgctctctcgtccgttactaatcctttttggcttgcaactaaattgttttgataaagctct  
gtggaacctacacaaaaatcagaccaccattgagttgtttacattccctttgagcagatgccttcattgacactccaaaccaacaaat  
ctggctctccatttgataaacaagaatagatacaagctcgaatcctcaagcgcaggtgaatctctccactcctttcttctgctagcttagagg  
aaacctatcggatcccacaatactactatgtgggatacacataggcatgcttaagacgtgtatataacgagatatttgaagctgtaatgtatt  
caacgtgttctgtaacatttctgaattggcaatgtagcgtccgcaagcaagtctgggatgtctcataagagcaagtggaaggaattgtaac  
agaacggagttgttgaaaaaacaacatattagggatcaagtaggaagaaatcgatagaattatgaattgttaagaggaaacacc  
gagatgaacataggtattctatcgttcaaagacggttctgcatacttgcggagaccatttattcttctaagccattgaaaggaccaaatgt  
aaaaatgtggttcgagaatacagaaaaagtagcagaatagcgtggatgtaatggagagcgtttccagatgttccacggctgcaaaaggatc  
gtgtgagaccaggagctgtcttattagtgaaagctattctaaatcccggtgaaagaaagataaaacagatttgcaggatacttattgctgtac  
gccatcgcggaccgaaaagctggttttactcagaaacaatgtgatgggtgctgggtggaagtcttattcctataactctccacagatcaaaag  
cataactgtactgaaagataacggaattcaaagcgtccaagaagagcatattaaagtacttacccaacctcgattccgactagcacctgtcg  
agccgctgtacgcaagtataaggaaacgaaagtagtgttcttcttcttcttacttgtgtactcctgttctgtagcaaggttctattgctg  
atggttattctatttattaaaattgtatatcttctatattgtccgtttctggatctctcttctttttacctatccttcttctactatgtgatt  
catacttgcattgactcttggatgagctttaaattctttttagtccccaaacctggcattagttgtgagtttcttctgaaaaagaagatgta  
cagtttttacgtataaaaatgaaaactactactctacttttctggttttgcacaaactgtcgaacttaagctcggaaacctattccattgaatt  
cctaggagagcaattactctcgggattgtgattttctagtttaaatacacatactactgtaaccttcatacgtttagaataagccaaaga  
attcattcgatagagcttttggacattcgtctttccaacttttattactgtttatgtcctacctacgaatccgttatttggcattctgaaaaaca  
atgaagcgaccaggcttgcctaggaacgacttctactcctaccacatagaaaacaatgaaagtaaagatcaaaagtaggagtaacaat  
aggaaatggagcgaacgaagctgtaggataccatgagctgtaattggacctggaagacacctaagatgatgttggaaattgtcgagctc  
ctttgatgggtgctgcctcagtgcttaacgccggtgactgtccataggttaagtagcgaatgcttttattagcattgttctttaaattccg  
tttctgttcttcaacattcgtctatgaaagttgcttattgtatctggctgatgttttgatagcttcttctgagcttgggatcaggtcgttttgaa  
ggaaaatcctgaaagaaaagaaagaaatgactaaaaagagcttctatgttttagcatgctgttaggactaacgtgtgagtttagtatgg  
gaaaagtgtacacacatcttcatgctcattgcatcgaaaatgggtgtcaacaacaggttctcaagggcaatgccaatggatagacagacttt  
gttgtgctgaatccagatcacaccttagacacctgacctaataattattgattatgtaaaaaatcttcttcaaaagttgctctgtgacaacaa  
catggctggctataatattattaacctgggtttactttgtttatgaaaattatctactaaatgatgaatgttacggaacctagttatgatgact  
atacactttttagacaattcttttttttttttttaccacaaattagacaaaacattttattcattcaatcatatataatggagacattcaaaagata  
ataatcattcagttcataacgaaatgaagaacttttttcttttcataaaaatgcacttcttattgacggctttgtttgaccatatacgaatagtg  
ctatcatcactagctgaagcaaatgatagggtccacaggattgaagcaatgtagttaacgatttcgagtgcccggtaaagtagtaagtaa  
tttccggagtcacgatccatattcgaataaactcgtctggctaccacttaaaacaaactgattgtcttgaccacaaaacaagaccgatcaa  
ccagttcccagtttagaccatgtattgccgaataacgatattctgtatatcccacagcaatattgtgtgaggctcaatattgtcagtgcat  
aacgagagctttttagatagcgagattgaagtcactttgattcgagatagattttttcaggcattctctgtagataggaataaacggcaatagtg  
ttatcttcaattcaagttgcttttggtaccaactgcatacaactcgaaccgctggttactaatggcatatcgtaaatattaacatttccattgt  
gcaagacctctcggtagcgaccaatgaataattgcatgtcaggagacctgtaagaaagataaccgctcaggtgaccagcaacaacagct  
cacaagtaggtatgctcttttagatccgatctttaccagtaaacgcattccaaagaattaccgagtagctgttagagcaagtaagtaata  
acggctatcgggagaccatttcataagcgacttcttctgtatgtccaattaatctgtgtagcatcttcatattaactaagtaagattatagctg  
atattcttgcgatgcagacgcaagatttgcgctattttagtaggaaatctgcaaaactcactcgtgtggtcatcgaacaatggatttcttt  
gttgaattcactagggtcagcatggaatctgacagaaaggtgaagtttcaaaacattatgatagcattgagaagaacactgacaactttt  
gcttgattaaaagatctaagagccgattcttggcatcataatgtcggggctgatgtagaaagatagctcatttaataaagcaggacgattgtctt  
taatccagatgaggctctgcaatacttttctgaaaacatgattgagagatcaactccttcttcttcttattgataaaatagctattatcggtgttt  
gtagaacaagactgcctcaaaagcgtacccttctcagctagtctaaagcattttgttttgaaaagaaaagggtccttttcttcttctcag  
tattgcatctccacgaaaaacaatcaagtaactcagtttcttcttctgctctgagcttcatagaagcaaaagcaactctcagcagtttgccag  
tcaccggaagcaacggcttttgaacgatttaacgttttccgctcgtaaacaagcccacttctggttccaggcattttaaagtatcttaaaaat  
aggctcagctagcaatccaaaatgaaagaaacctgtaggtgactgaatgtagtgactgtaccataaccgtaactttaaagaattgaagga  
taagacgaacaatttctgtcccatgttttgcactccatctttagcagctgttgagcgttttctggctcttgatcaaaaggagcgtttctattgg  
ctgctgtgaaagctcagattgttttctgttgcgcttactttaaaaaaaatgacgacggccttcaattgaaaatgacgttaactgaaaatc  
ttgaaaaaccgaattattatgaactcggatttctttaaagtccttatttttaacaaaggaattgtaatgaggttaaaggtaagaacggtagggt

gtagcacaagcgtttgcagataacaaagtaacacaagcagcatttaagcatcggttatgaagttgaatgttactactaaattgagggtcctt  
gtattcttccaatttatattttaagtagcattggagaccatcgaggaacctgccgaacacaatgacaaggacatctgagtcgtatatggggaata  
ctggatctaagctattagttttccctttacttgcttagagctgcaactgcagtgaaagatggaagaaagacttgcaagttagctaaatcatatta  
atgtgaatgatcgggactgggacgagcacaactgggaggaaacaacgatttctgttaaagccaatgtaaattacatattgaggggtatatggta  
atctacggccacacctaggcgaaaacaccagttcccgtccgatcactgcagtaagcgtctgagggcctcgttagtactatggttggagacaaca  
tgggaatcgggggtgctgtaggttcaaaaatttttatataatgccgatttctttgattgtaaagcgtttataaaagcgttctcgataaactcttg  
caagttgttctttacaagtgacagtaacaaaaatcactaaataaatgaatcaaatggattacgatttcaagaaagaaaacgatagtaatt  
gattgtaactcattatagtagcattgacctgcgacataatctataacaatattgataatctcgaaaaccgatttgctcttctacgttgtaaca  
taacgacatcaactatactattgaagtgacagagaatcacaacaggcctttttattgtccgcttataaactgcttttgcacgtcaatgtcattcc  
atattgttagaaggatcatttcttagtcaggatcggctaataagatggtatgtaaaaaataattattcatttaagaaaaaccttctttcgtcacttt  
agtcctatgttagtagaatgttttgacgagaataaaccactgaaacaaatccacccttaaccagcaagactaagattcatgaagaagaaa  
aaatataatgaagggtatttttgatgaaaggattactctacaactctaattcttcattcgtagtcacggcaggagagagaatgcatcatcc  
cttctgtggtatctgggaagcgcaggagaactggtgtgctcagttgagcttcaagattctagcaatagataacttttttaaatccttaacaagtag  
aaaatattagcaccactgtctgccaacaaaaacaaatggaaatacgtacgaaaaattatagaacagcagaagaatctgttaccatgacaat  
aataggaaaagcactacattgtaacaaagaattgcattttgtgacaaacaatgatttccactcacaataaaagccaacaaacgaacat  
gtaagcctaaagcacaataaactttcaattgacctctcgtccaaaatcctaataacttcatacagtggttgaagcaatactgtatcattata  
tctatctagtcttaacagaagctttggtggttagtggtataatgcttccatcgaagcgaccgggttgcattcccggcgaagcaagaatt  
ttctttacagactcaatttactttcatgattaaacggttacagttggtttataacttaaaactttaaaaatgcaaacatgctgatgtatgattc  
tctgatgctgtaaatcgcatgggaaaatcttagtattgattcagtagatggattcataaaatcatagattttctatggatggaatataaggat  
aaactgttagtgcttattgaattactacgaaggcacttaaaagaatcttctgactacattttctgttttctgcttcaaaccatcgtcttggtt  
aagtaacaaatagagacaagcataaaacataatggttagatcgctcattcagcaatagagaagcgtttaaagaaaaaaagcgtcgtcat  
aacaagaagactgaaggtaaatactttcattgtttacgcgtcacgaatattacgttaacaacgagaagcttgtaaacatgacgatttagc  
agtgatcgataaatactttgtacaaattggttttagaaatataaagagattataaaaggtaaataagtcgttcagttataagctcacttaa  
aacgtgaagattataatgtctcggccgggaatcgaaccgggtcgttcgatggcaacgaagcattataaccactaaaccacaaagcctttatt  
ataaatgatagctatgaataactatttatcaacagtgacatgtataaacaataaatcagtaacaacgttgaagctagctagtagatgcagat  
gtttctgattgctgaaacaagtttttaaaatactacgggaagccatagcaaaacgacgggttcattgtttcggtttacacttcatctgttgata  
aatttacaataatattactctgtaaaaactgtgaaatcataatattaattctttcggctcgtttattctcgttaacgtacatattactagcgtcgt  
tgttttcagataagacaaaacagctcttcagggcagtagcttttgagattcaacctcactacattcactatcatagaattattactcaatggta  
agttaactaagtggaacttcgacgatacattagtaggatgaaactaaacaagtaggctggagggtgaaattgcaaaaaggcaattagaaacc  
taaaaattacgatgaacatgaaaaccgttttggtaccgttttagtgttcaggaccaggtacggcatcttgaattctatgaatactccttttgg  
aacagtatattgactaaaactagtcgtctgtcccaacatgcttgatgctcattgacgagctgtccgctaggtcatgatgaattggtggt  
gaagtcattcgaattcatcaagacaatgtacaattcaagctacgaagaacatcgggccttaccgtcgtgatcccgtccaacgtactggaaa  
gcctttgtctgctgagttaggccctggtctggctgaaaccatttatgacggattcaacgtccgttgaaacaaatccacgacaaaagccaaagatt  
tacattcctagaggtattagtagagaagcttttagaccgtactcgaatgggatttcacacctaataaaaaattacgcgtcggagatcagcttct  
ggcggcgtatgtttggttctgtattcgaaaaactctctttaaatacaccataaaatattgcttccactagagctcgtggtaccgtaactatctcgc  
gaagctggctctgacaggttgacgaaaagcttttgaggtagaatttcacggcaaaaaacaatcttttggtatgttacaacttgcccgtaact  
gctccgctcctgttgataacctaccgcaaccaaccattgcttactggcaacgtgtcctcgattcctgttccctgtgttcagggtggtacc  
actgctattcctggtgcttccggttggtgtaaaactgtaatttcacagctctctcctcaaatattccaactcagacatgatcgtttacattggttggtg  
aacgtggaatgaaatggccgaagcttgatggacttctgcattaaccatgatgtcaacggaacccccgagcctatcatgaagcgaactact  
ctgttgcaaaacttcaaacatgctgtgctcgtgaggcttctatctatactggtattactttggccgagattatcgtgatcaaggaagaat  
gtttcatgatggctgatttactctcgtgggtgaagcttctgtaaaatctggtcgtcttctgaaatgctgcccattccggttatctgctt  
atctcgggtgtaagctagcttcttctatgaacgagctggtagtgctcgttgctgggtagctcgaacgtgaaggtactgtttccatcgttggcgt  
gtttcccacctggtggtgactttctgatccagtcactagtgctactttgggtattgtccaagcttttggggtctggacaagaatggctcagcgc  
aaacatttccctcaattaacacctcttcttattcctcaaatatgtaaatgctttagctcctggtatgaagaccggtttctggttcaacgcattac  
gtgatcaaatcaagcaaatcattcaacaagaggattcagctgtaaaatcagattggttgtaagctgcaacttcggaaagtgacaaggtta  
cttttagacatggcggcttatcaagaacgatttcttacaacaaaacggttattccaactatgatcgagctgcctctttataaaacttaccacat  
gatgagaacatgatttcatactacgggaaagcagtaggtaccgtcgaacaaggcaatgttcaatggtcgaagtcgtaagcctcagat  
atttctttgaacttctgctatgaaatgaaatcctgatgatggcgaaaaagaactcgttgagcgttatgagcaacttacaagaagattgacg



acaaattcaagcccttgctgaataactttaatTTTTGcagctaaacattagagtgtgatactcaattaatttacaatttagtcttccattttacttt  
tatcaatcttacaagatctaagTTTTTTTTccctttattaaaaaatgcttacaactccatagaggtccgatgaatgaatgaatattttttat  
atatttgactaactaggcacacagctttacaaaaaaatcaaacttaataaaatttatctatatataataaactcatatcttttaggcat  
tattatattcataattatcataacatacaacagcaagtggtccttcaataccaaaatgcatcttcaatttaccatctgtcttccgatccttatcaaa  
aacgtcccaaaaatcaccgggatgatccaagtgcagcatcggaaagaaaaggagacttttgtccggcatggaatttcaattgacgaatgtcttg  
gattttgttcatctttaaatactctctgagcagataaatcttccgattggttaattcttctggagaagacgaaccgaacataatgggaaaagtaag  
gccagccgtaggactattcgtacggctgaaatagtcaaatcaatgtcacagcagaccaagcataacagctcgttcttccaaactcatttgc  
gaggacaaacttgactagatcaccttcagcagcctgaagtaattgatttttcaacagctacctaattggcatcttggacgtaaaccgcaaga  
cataattacctgtatccgtaaagaattctctcggcaacccataaagttacgagtaacgcttccaaggatttgggtgctggcatttctgaacaagaa  
atcccagctcaaaactcgtcatcaaccgaagcaaatgatctaacatcagactcgcgctaaaaacaattgatatttaccagcctatgggtgcc  
acttttgaataatttcccaactaatgatggctgatcgaagaataattgaatgcactcacgttttagatgggaattgatccatgaaaaggctttg  
taactgtaatatgggattaccatgacatccatcacatccgctacgaacggacgatgtgtacggaatagttgccgagacatactagaagaaaa  
gaagtatgtcctttcagctatatagccaagatgttgacctgatggtttaaattacatcattcattggtccttcatccaagaaaacgttcat  
catctccaattgcccgtcaacaatcagctcgtctgtatagcaaggagccgaggtgagttgtgattgatgactcctgtgctactaacagcagc  
gggtcctcgggacacaacttgggcagaagcatcaatatacctaagcgcggcgatttatgataaaagcgacattcagagatcgaagccagcg  
gcagctggaggaatacaatgtcgaagaaaagaatgacttaatagagaattgataatgtaagatttaacataatagcaaaatcggctgcaat  
ggtaactctgaatgaagcttgctaaaggtaagattctctggtaggaagcaagccctgaatatacगतatcatcttctgtcgtggtatctgattac  
gaaaaaaactataataaacgttacactcaggtaaagaagataacgacaatgtttgaataaatggtatttatgataatgacacgcaacactca  
ttactctgtatatttgttaccattgaatttacttttcaaccaaccagtcttagcaatgaaagaagaaaagagagtcaaggcataaa  
caagaggcagaaaaatagagatctatccgtttacattggcaatttgcctatggttgcgaagtattgaatgtcgtcaatcttggcagcaatattggt  
aagctttctcattgaaatcaagccaataaactaataaaacaaaggaaatgtaattgaagcacatgtcttaataagaagaaaagagat  
caatatcaagggtcagcactgtttgcatttgtttacctggaaacacggcttgcgtagaagctatcgttcaggcattgcatggcttccaatgaa  
ggaaataggttgaagtaattcttccatcgagcgaagtaaaagggtgattatgctaattgtttcataggatcgttgagaagcgtcatccagccaat  
cagccatattaaattcactcaaaactcaagagaaggatgaaccagttcagcgaagctcgactttaaataaagaagcattatgtctcaaggaa  
atgcaaatgaagcaatcagacgcggaattagaaaaacacatgaagtatgacaattaccaaaatcaaggcagtgacaagaaataataaaaac  
ggacgaaaatggcttaaattatccccgtctagacagagaggtacgtaagccgcaaataggcgcttcaagcgaagaagattatttaccgctca  
ctaaaaaagagcccactaagtattccgaaccttctacacaagaaaattcatctgtctgcaggatgaaattaaaacaaagcaagccgatccag  
aacatagcttctcaacaattatcaatttctgccaagcatacctttagataaaactgttttactccgaaactgctgagaaccaattctggtaattggc  
atttctaactccaatgaaaactcaccgtagatctttatgacgacttttctcagatggaaaaattttaggagcggccatcaatcaaacaccga  
atccagatcaaacgttatatgctgagttggcggtaactctcatcaagattgttcaaggtaaagttggttatagagctctcgaattcttctgata  
attgctaaccaattcagattatcgtcctttcaaaaatttctatataaaggatccaactcagttcttgtgaagcagccaatgcaaatgcaggcg  
cctccttctcccaatgtcttgcagcgaaccaccgatagtccaattccttctaccatttgaaccagtagcaacgatggaaccgctgtagcaa  
tgattcctcctcctccttctcgtaccgctcgttccaatccgagtgctattaacacgattgatatgaatactcccaagcttccgaccctgta  
atgtttgttataaaaatattgacgataatgtttaggaacctcagaacaatttaggaatTTTTTctcagtttggctgtgaaatcgtgtgttttag  
caagttaccaaacactggaatttctaaaggatacggattcgtttctttaaatacctccgaagcagtgcaagcaatattttttaaacaatac  
gtatgttgcaaaaaaagactattttagtttgcggaaaagaaagaagaaaagaaagattgaatgctctattaaccaagaattggca  
ccagcacctcagcaccggttctgttcaattatctctgaaccattccatttgacatgtatttcaatataggtcgttccacactaccgtcagc  
accaatggcaaaaccaccggttcaatggctgaaatggagcaacaaaaccgttccatccgatgaaaatgagatattgtaaaatccgggatg  
aaacatcaaagagaagttccaacgatcaaatgcactttcaactttaaacaatatggttaactaaaacaagcacaacagtgagcatttacttg  
tttatatatataaaaaaaaggaacataaacgacatgaatgatttttctctcgagatattatctaaaataaaacatttaaggagat  
tgaatgctcatcaataacctgtaccgagagtaaaataatactcgatgaaatgttaaccgagatggtttaaactgtttagtgaagaaagcg  
cgtttacatacttatcagacttttaaggaaggtataacgaaggactgttggttctaaacgcagaatccgctggagtcttctgtggacagtgga  
cttgagtaaaaagacattgaccaccagatccaaaattatgcttattgttgcagcttttccagggcttggcaagttccttaagcccatggactgat  
atcaacaactacgcttcttatccaagactgctttccacaattccgagcaacattaattgccgatgtctagaagaaactgttagtcttagaaa  
aagagtattggtgaaatgatctatgtatacagcaatccacgacttcaaaatttcatggatctgcgatttccatacaggagcagacgtgcg  
agtggcatttatagcaggtctggtgatacaaaaaagttcataaagaaccattatacaaatgttttagtttagtagccttgaatgggtagtcaccgtt  
aagagcagatttggtagccaaaggtagtaagggtagaccacaaagaaagacagaatgtatggttaggatcagtgaaacaagttcact  
aagaagttactatataagtaagaatcaaaatataaatatgtttgattttattatgttcaaatgtacttaacctcagatgaatgttctttcataa

cttagatgctaataaaaacctgacaaataccaaccacaaaacgattcagtaattgttgattttaagctgaaaagggtatttatcagtgattat  
tttctattactttaatTTTTTatgtaaagaaagacttTgctTgcaaagaggaaatTTTgtgattgtttataaaagtttgattaagtattgaaggataaa  
gcttataatcatgaatcatgaagatctattaactcagTTTTgtaagagTTTTatgtTgaaagcacgcaggcacgatttttctTggagtctactaatg  
gaactatgaattggctgctgattgctaagggaagTTTTctctgagcaagaggaggattgaaggctcgatcgtgcaactacacctgatac  
gaatgctgctTgccaagtctTgaaagcacaatccgcctTgaaatcccctgTaaattctaaagggaAAAagttTctcaaaagaagttTgc  
tactTTaaaagatctacaagaagatgaaggagatccagacgaaaagTcgaatctatttactggaggagaaaaagTgggtTgctggtacaagg  
acctgaccccaaaaacagctTgTccgagatatacattgagaaggctcaccagcagacagcatcactggTaccgaacgcgaaacatcgccacca  
gcccctgTgctgctTtagTgggtctggacaacggTtaggaacggaagatgaactgctaggccaccaaaacatcggaaggaaactcctTcac  
tcaagcaaccgtgcccgaaccaaggaaatgaaccagagagaaatctgggaacccctgTtctgTactctTgattttctggcgaatggTTTTagcgt  
ggatgacggactgctTtactctTatgatgatccagcgaatcaagaaacactTctgTcaataatggccgtgccccactTcacctgTggcgtt  
actatgaatcagcccattgatgtagTgtaacatcgtctTgatgaagattatcgtgcaccaacgaagccctTtctggaaaaggacaacgtctT  
ggaagtacatatgctcctcagcaagcgaatTctggcgcattTcatgatcaagctTctcTcaaaagcagTgaacctgcgaaaaagTtcaagt  
agacgaaaagTcaaccgtctacgcaattcaagTccgctTaaacggaacggTtcaaggaccTgaataacccTgaattTgctcTatcggTgatgatt  
atacgaagctgTtctgTctTcaccaggatcattattctgTgtgTgcctTtccctgTctaaactctagaagatgatccatctgTcaccattgagca  
ggcatctTgcaaacgcatctTgtccaaaagcaacaataagcaaggagaaaggaggTattccgtTtatataataataataaaaagTaaa  
taaaattgaaatgacaagactTgtttTcggtTtatgatgaagTgcgtTtccatgcatacagaagattagTgatggaacccTtTcaacgaat  
ccatcgtTggacgtTgaaaagctatctTccatatgTcgaatgTggTtgggatgaagggggTccatgTggcatcagTaaaataagctacaat  
tcgaaacaaaaaatagaaaaactTgaaagaaagaaagaggagactatcgcccaataataatagTcagTtTtactTaaataagTcca  
cctcgaatcgtTatggaagaagcgtTtataatgctTatactgcctTactTcaatcaagTcgcggtggTgtagTgggagcatgacagactgaag  
atctgTggTcactggTtctgTcccggTctgTgacactTTTTtattTtctgTaaattgTgctTcattcgtTtctgTtctgTtctgTtgaag  
gaaaaaggctTgtTtacagTtccctTctcctcagTccacacaagattccctagaaaaggTcataaatgctTaaagaaattTctTTTTtattca  
ttagaatgactataaatgaaattTcttatatgcgagactTtgcTtctTgtTtctgattTgtctatttactTgccaacaaactcaaa  
ctatgTcgaatcataagctcagTtaagccaaataaaggTaaagTaaatcaagcattctagatccaaggaaaagataacaaaaaatctTtca  
tagattgattgatcTcaattgatgTtccaactcgtTaaacaattTgaagacattacattcgtTctcctTtagTcctaagTgcaagctgcaaga  
aaggTaaagTgactgaaagcctgTgtgagacattggcaagacaaaaagaacgagTggacaattatgaaatagTggacttaattca  
TggcctTcgaaggaagcagTtTtattctTttagTattTctcTcaagacaacagTgggtTggaaaactgTgagccgaataacaagaat  
gtcgaataatgctTcctTgtTtctagcgtTcatggggaacggctggaagtacgcaagTgtTcagTgctattggccaaattgctggaaaat  
caacaccgtgTgcccgtTtTcatctgactTgcagaaagTggaccggaaagTaaattgacgagaccTtagagacgccaagaatgacggga  
ttcTgaatattctggctTtgcTggagaccacctTtgaatagcTgatcattgggagggaagcTgagTgagTtTgagcatcagTtgatttagTcag  
ttatattcTcaaaagTatggagattactTctgattggcgtTgcagcatatcctgagggacacgcagattcgaatgtcccgaattgacccgtgat  
cctgctcTgatatgcctTtctTattgaaaaggTaaaggctgTgctgactTtattatgacccaaatctTtTatgaaactaatgcatTattgaaatt  
gagaagaccTgagaaatcatgagTccggcgtTtTcaagatataatgattattcTgcccgtTatgcccTaccagTctTtTcattctcaagcgaat  
gactcgtctTgtgTgTgacagcattcctgaatcattgatgaaacgtatagaggctgTaaagTccgatgacgaagccTcaaatccataggtgTga  
gacgctgTggaaatgatacaaaacaattatgcgcaatacaaacaccgTatcctTggctTtctTctgacccTtaacctTgagaaatcTgtTgct  
aggattctcaagcatagctctTgtTgactcgcctTgggaacaatacgaatctcaactcaagacgagaaatctcgaaaaaccaccattagacgt  
cttagcctcaacgaaactcTgaactTcataatcatgctTtattcctcagatgattcTgctaaaaggaaatctTctcatcctTctgactcaaacgaa  
cgaagctTcgtcTgactcatagagacagcctcaccaccgatgctcctTctcctTtccgaaggaaagTggTgtTtTgggaagacaagcaaatg  
ggacgattTcccaacggTgTtTcggTgatcctagatctccgctTatggTgagattgatgTtacggacctaccctgactTccccagcaagaa  
gcctTcgtctTgggctatcctgTggatgaatctgatattctTctattccaaaaacacattaagaacgacatccatgctattcattgattgat  
gaaccgtTgacgagacgaaattgatctcaaatatctTcaaaagTgaatggcgtactTggTggacagtagtagTcaactactgTtTaat  
ggTgcccctTctacggacctgTtTtTggTgggTcTaaaggcggaaaagTtTaccagaaggcattcattgaaattTtataagTtcaaaagatt  
caacaattTgaaagaagTggcatgataatgaccaaatacattatgctggaataataaaggcactTctTactaatgccccaaatgacgg  
ggccagTcagTcactggggtTtTatccaggaagagaaattatacaatctcaattatTccgaagTctctTtaaggctTggatgaatgaagct  
ttgacgtatggcggaatgggctTactTgatcTcaaaaatacagcaacaaggaattTgtTgaaacattTgacggatgatagaggctTgatca  
attattcatcattatgataatgatgTctTtTgaaaggctTtTgaagTcgtTatgTaataccctTtataaatcgtTatacattctgTtTgct  
actccattccccactTtTtTctTtTtagatggaactattcaatctTtataatgcatctactTtTgaaatctctTtaggaaaaataatacac  
attagTataaagTcgttaggctTcagTctgTtagctaaagTaaataaagatattTccatcatataccgtTcatagTcatacgcAAAactgatcta  
aaattataatTaaagatgagaaggTcactacatgctaaggaagTtTccgtgaaaagatcTggctTtTatcctcaatcaaaataacctTg

agttgtacgatgttgcattccatgggtgtaacatatcaaacagatttgcagaagtagtaaatgctttgttcaaaatggcaacgcttctcagttgtccc  
tgaaggacactaggagatgtctgggatgcatataaagagggtacagaacaggagcgcgtattaaatggatacagtttccctgctgttgca  
gcagtgcaggacatgtataagtcgataaagtacttactatttccgaggagagaccgacgaatcgtaatgataaccattcggaacaactgtggcatt  
gtaccattccatccgaaatagcaaaaggttgcttacacagacaaacagcagtagagttgtgatcctcactaatcgacgcttgatgtgactggaatt  
gaggattatcaacgaaatgaaatcagtaaaatcagcgatattcgggggattgtcattttggcgcgatgaacaagcgtatcagctgttgtaaag  
gtcgggacttaaacagcttcagctaaactttcatagccatgggtgataaggtggtactcaatgtatgaacattctgaagtcgtgtagcagagt  
tgtttgatttcgtatttgggtagcagcaatcgccgagcaccctcgccagaggtaattttccactttcaacctgctccataatttctcgtgacgct  
ttgtggggcgcggttttctgttagacctactctaccaataaacggaggaggaaggggtgcaattggcaataactcatgtaattttgtcggaaaa  
catttatttctctgtaaacagaatttccactcctctaattttcgaaaaagaaccggattagaggaatgtcctcaaaagaaagctcaggggac  
ctgaatgggttctgtatgatcacgaaagtttacggcctcattcacgacttgttttagtaaaactcattctgcaggtgaaaaggaagattaggg  
atgtccgaaaccatttgtgaagctcaatcaacggaggctgatgggaatgacgaggtatttcgacacgataatcgagataggacagataaatt  
ttcatttgcctgaagtttcttctggacatttcatgcatttggcgtgataccattcatgacaaacttcacattcaatcatataccggactcgggtaa  
tctacaaaacagtaatggaaatcagctggattagatccagctataatgtaatactcattaccaatgcaaatgagcatttgaacctcatcaat  
cattgccttgagtcttctcctcaaaaattcgagatgtgactgaaaaatctctagtggagcgtttgctttaccaagaagcgtttaccacggcga  
accattcaagtgtttcgttacgagttttgagctgtaataaattctcgggttactgaaagagcttccgcttcggtcaagacattccttgctca  
tcaatagtaggtcgtttcgaactcggcattctgagaactgttatcagagaaactaacggctgatgatgatacagatttaataaaacatca  
ttaagattatcaataactgtttatccacacataactgctttgcttcttttaataccaccaactttgagttgtcgtagtttctgacttaaaaaag  
tttggcctgtttatccaccgttcggatttctctttatataaaagcttggccatttctcactttcggggggtatcccaatctcgtttcctcgattg  
attaaatcaactagtttcttaaaagtaaaatcttctacaaaaatttctgaaactgtttgtccaagctgtactagataattgcttcaaaaaa  
cttaattcgggggttcaatctgaagctttaccttcagtaaccatatttaagcatatgtcataagtgagttcctgattcatcaacgatctgtctt  
actctgataagactttaattggctagtttctcaacaagtagttcatttctgaatttcgaaaggaattttctccttctcaactagcttgaccagt  
aatccgattcattatgttttaagctgaagataaaatcattcatctgaagggttcttagcactctttttatcttctctgtcctttttacagg  
agcctttcttttagaacgacagaagcctttccaaccaatttggccatttggacgaatgaacgaacttcatgactcttttataggacaagaca  
gagatccgcttcatagtaacaagctttaagaaccttcaagtaggagcagaaattagagaaagcaccgcggtatttttaacatatacagctt  
tttggcacgactgaaaacagatcataagcatcaagtaaagcttcatctgtgatcggacgctgactgttaaatcattatcttcatattcaagttt  
gactagcgtgtagcaaacagaaaactgagtcgatttattgatccgcagcggccaagtaagcaaacgtttacaatgactgcaggccataact  
gatgattctaaagggtggaacccaaggaaggaagcattctttttcgaactcattccgtacttttaattcgttctattcgttcttcaagca  
tgtcataagccaacaagctgaatggaccgtttatccaccgtagcatttgcataatgtgtgtcataagaaaatgggtgaggtatgcataattcg  
ttgtaagttgaaatgatcgttgagcatattatcagtaatccactcttttacggcgaaaggaatagattcagaaatattaacccatgatccaaac  
atgtataaagtatcgggaaacgtgataacaaatcattagatattgcaaaaatgtattcacgcttaccattagcaagtaactgaaagag  
gaagaacaatcgaagaatttttattgtctcgggtcgttcttaatgatggaggtagaagttctgacaaaagtttctcatatttgcagtctctcag  
caggaataacataccaggtctcggagatcctaaatgatgataatgtaaaccaataaagccatagatattttcgccatccaggacagctcaac  
atgttccaaaatgaaggtaggagtaagaatcaggaggagtaatttcaaaggagacaattttgcaattgtaaaaaaggaaggttccagg  
gatcattatagtaaggactctgtcgttggtaaagcagttttgtttggctaaaaccaataaggggctgttcggatattcagacttgaaga  
tttaggtaaaaagaagaagacaaaagtattgtccagaggagacaacgggagagatagtataatgtgattcagcattaagtaagcgtat  
gggaaggatcggacgagcttctgtaaccttgaagatgagcagttttcgcttcaggattttgcgatgttgatgaagggaagaatggtttaaa  
ttataaagtacgacggagaaaaatcgtcatgaaacgaagaatagcagacgaaagagaggattccaattgggcttggatcaaggaatga  
agaaatgcaatgataatcgacatcttccaggaaattttaagattgtcgggaatacaactgttcaagtgaaatagtgatcagtaatgggg  
caaaaggagcttctacacagagtaatgatagcttgattgacagatccaacaagtacgaatgacagccttctggtcacagaccttgcacttt  
ggccatgcaactgacgactgctcgtttcagggacgagtaattggtgagctagaaaagcctccgcatatttctgactttgggattcacaagac  
tcataagtagaataggcagttttcaagctattaacatccagcttataaaatgagccgcttgagacaaaactcatattcggacatacagcgttt  
tcgagaagtgcagccattgcttgattgcagaagatcaactgcttccctagaacgaaaataaacgaaagaattaccgaatcagatcgatcagc  
aatccgcttttcatcagacaatgaaatgtagaggatgtcttctgtgaaaaataggagacagatggaacgagcggaaaggactattattctgc  
ataaaatttatgtcgtggagtctaacgttaaagggtatgaccagccagaggaggcaatattttgaaacccgaatgcttcatagaagat  
atatctcattatataatcaagaccaaggaaaaggactcctctgagggtcgttccaatttctggttttcttggtaagtataattctgcaagag  
tcaggattggaagatcgagaatcgtcttgggttcgaaacaggactgttttctgattgttatttatacatgctcgtgaaggtctgtatggat  
ggaagaagtctgctttgatggcactttcgtttatgtttcaaaatcaacagaaggaaattgaaaaagattctgagttcgaaattgctcagaga  
acttttgcattgttaccagtcggagacacagcgtaaaacgacagatctcttgtaactcaaaaatttgcagtgaagattcgtaccccggtg

gtggtgaagaatttactgtgggggaaggcaagaaaattagagtgggaaaaatagactcactaagttaagcgaaggtaagagaaccgattgtt  
attaaattggaaaagtaaaaggcaagaaatatttaaagaattaatcaaacattaagatagactacattagggtttaataataaaaagttc  
actagaaatcagttgaaaagtttttttgccttattatagagagaaggaggttagcttgatattgtgttacttacaagaaaaataaa  
taaaaaagtgagtagatgttttggaaataatgaaacaaaggataactgcttcttcttttaagcaggagttgggttgccttataggat  
aaagctctttacaaagctgcaattttcaattcttggctgttttttttttaaatcagtaagttgttttgcatacacacaataaaaacaatgg  
aaaacgaattcatttattcatttttaaaaagatagtagtggcaaaaatttcttagcctaggtcctaaagaattacattacgcatataacttt  
gaatatgatgaatataatgaatgtggggcgttacgaaacgggaatgattttccaatcttttttcttacttcataggaatgatcaattcg  
tctttcatgctttcttctgatatcatgatgcctcacttgatatgtaaatgaaatcatcagttatcaacataattcgtacaagtttaacattctg  
tactgtactctctgataaaacaaaattcttcttaaatatctgtaaccaaagaaggagagtaaccttattatgttcaacgatggaattg  
ttttttatgcaggatgatgccttgatgataatggatgttcgtaagttcggagatagggaaaacgagaaatatactttatcttatgaagt  
ttagaaaaaaaagtggtctttgtatataatcggaagaaataaaaaaattggaaatacattcaaaatcccatctgcttaacttatactgt  
caccatatcccaaaaaaaaaggaaaaaggaaagccaacatagaaccctctgaattggttcttgcaccttaccattcactcaatacttg  
caatgaaattcattaataatatttctaaagcaaaaattgtaataactcgtccatatcacaacacacatttcttttccctttttattgt  
ttaccattgaatagttcatatttcttcttaacctactgattcggatttttaggggtagcaacctaaagcttccccttcaaaaatttcgtt  
atcacacggttctgctccaaaagtacccggctacctaataatgtaataatcatattaactatagccgatgattcttcaaaaggatcatgagat  
ccgttgacgatgatgaaacattcattcatagttttttctattttatcaaatgattactgaatttgcgtttcatgaaggaagagtaacga  
cgaatagcacttactcatcttgaattttagaaggaaattaccgctataatgatgtttcacgtcattcagatgttatgattccaaagcgttctcgt  
tctgactgcccagggttatggcctcgatcaatacattccttacctaacctaagaataaaaattcccattatcgtaattcggggattaaggaaggag  
atacgtagcaatcgatctatgaccgaaaggccgacgtcaaaatgccgacgtcaaaatgccgatgaaatctttctcaagaatcatgattgat  
gacattacctgctttttctataataatccctatagacacggtaatttataagtttgagagtattgaactaatataacctaactgtaac  
aagaaagtaccctaattcaagagagatttaactgtaaataggttcttctttttgacttttgcaggttcccttaattgattcatttagagc  
tgcaattttgtctcaatacaaacatctttgattttgttccaaccacttcaacaagatgcttctcgttactgctcacttttactgggtgt  
ttttggcccggagccttcttctgtcaagctgctcctacagaattctccggcgtcggagctgttgcgctaattcttacctacaatgccacaggcatt  
ttgatccaactaaaacgccggcaaatcacccctgctggtggcatcgttccctatggagcctaatacaacatcatcctttgagtgactttgacta  
tcaatctttatctttggctctgtaccacgagtacattgaatgaccttttaattatggccttaccaaattctcagatgccgaattcgaagaagctg  
gcataactgctgactaccgtcacttaattcgctttatggctcaacaagagattggctacatcgagcttattcaaatatgctcgggtgggagcctcct  
aaagcctgtcaatacaaatatgactttgaaagcgtaggcgttcttggactttcacagaagcttacacaatggactgaatccggagtctatggtt  
ttcttaacaccttgatttctgctgctgtaattctttacttcaatccatcactactgaagctcgtcaggaaatgagcttctgcaattgcagggtct  
cttccctatcccgctggttgaactggcttcccaatccttggctggttggcttctcttatattgttacctgctccttccaacaagaagt  
tggctggcaaaaactccctgcttctcagttgttagtctcctgttgccacgaactttaccaacggttcttacctcaatatcctaatggcacttaca  
tgtacctgctgctgttctaccaaccgtactctgcccattgcttcccggcaaatgttgaattcgcctgggaagctcccggaaaaagatagg  
cccaacagttcacaaccactgcaacttctgtaagggtgctcctcaattgtgcttggatcagtaattgaatgtaacttactcctttgaatt  
gaccggcaacaacaccggcgtacttataccaaggtgccaccttcaaatgacttactcaacaagtcataatggttcaagctttgtgtttt  
acagacgtagccttgccttctactccttttaaccttcagccatcaatgaacatattgttctggccttgcctgtattcctctggttaaatcaaagg  
agctagtactgacgaagctgtaactgcttctgaaaccagtttcttctataaattttaataatgaacgttagcgtatgacgaccgaacga  
aaagtcttttaattgtttacgaatcatctgctttttagaggtgaaatgggttcttcttcatatttctttgtattagcctttttggatactataatga  
atttttgcaagcttttaattgcttttgaacagtttagagtggatgtgtgtgtaacacaaaacgtattcaatcataaaaaaaggcgtcc  
gcttactttcaattttcattctggttttgaaatagccatgctttaaatacaagtaaaagcattaaacacaccacattatagtttcccccttaacg  
aacggttgaataacctcatattatgaatattctctacattcctattataacaattgatttcttctgtagaatttcgcatacaccatttgcattcc  
tctatcaaacctgtacaacatgtgcaaaatgaaatggttcgcatcagttggttttgatccattgcaattggcggcttcaaaaagctttcagtg  
gtgcaaaaaggaggttctgaaacaccaaacacgtctattgtcactttgatgtctccttctgggtcaatgccggtatgaacaccatacgggtg  
aatgtcaccacaaaacacattatgaatgacttacgagttgtgaatgtataaataatcttactaacgataatgtagatcctaagtcaggaagc  
tttagactgtgttcgaggagccctggcactcaattgcaatgttgcctcagtttgcagtttgaccgaaagcattactttaccagacttaccag  
ctggctatcagattactcaacgtgatgttccattaggaagaacgggtcgttcaactttcaaacatctagacgacgttgataatacatagtac  
ctattcaacacgtacaattggagcaagtatgatgtctctgcttttctgtattgaaactaacaagcttgcctgatataggataccgaaaatc  
tatccatgtagatagtttcaaaaacattactagacttcaaccgtcagggtctcactacttgaggtgtcacggctcctgtttatcatgatgaga  
ataccgctggatcttctgcgaaaattcaatctatcatgcgttatcccgttttctgatgctaaaatggaaacgggtggaatgcgatgcgacgt  
aaatgatctattgcgcaattttcgactcctagcaatcttcaaaagattttacagttgggttagagcttcccaaacagagttgaagaattta

tcatctgttcgaaatgcatgaatgccatacgtatgaagtgcaccgtcagattcccttgcaaaaaaatgaaattgggctacagaaacaag  
gggcttgatgataaaactggcaaacattcttattacgcgataaaagtatttcagaggattatctctacctaccgaaacagatgtccctcctgtt  
acaatatccaaggaataaatttaacgtatgctgtgctaactgttttaggactacgtgagagaaatagccaattcaatgggaccacttctgacg  
atctttttattatgctcagctcaaaaccttactctatgtccatacagatgacagctattcttttaaatctccctatggatatgattactattatactgtt  
agaaaaatcatcggcaaaacaagccgggttcttaagaatattgatgattccttacacgccttaccacactggattactgacctttagga  
aagcttcatgagcatgaaaaagaagaagacctctttatgtccctccaaatcagttagccgatattgtttgctattgttctgctcgaaaaaattctcg  
tctgacagcaaaagcgttatcaaccatttgattgtaacgccttcaaaaaatgtcgggtgcagacattataaagagcttaagctggattttattcaa  
gattccaacacattagatgttcaggttgggaaaaattttagaagcatctccaagcaagttcgggaattcctgaaatggaaagcaatctctgcttaaa  
tattttataggacaagtaatgctggcaagttcgaggtcgaggtgatccggttgaatgagaaattgctgaagcagcgtttgggcgacaccttgaa  
aaagtaactacatagtcattttaccgattacttttaatttctgatgatgacttggtttaaatagagctttttggatgttactgtataagaat  
gaagaaaattacttagtactgagtgcaatgtctactgaacagaaataaatttcatagattccctttataatacactcgacctaaataaacia  
aacaaaaaatttttttaagaatagtgtcgtttgctgtaagatcgttcatgatacggtaaaaatacgaaggaggatcctcccctaaaatt  
gttagcaaatgttgccttgtaaatccaagcacttacaattgggtgataaaaagatcgacaagatctggtgggatagtcataataagggttc  
agtagttcagcttcttttaaatcaccattttgaaatgataataatctctggagaagtaagttggataatagactcaagatcataaggataaa  
caggactcaattgtatataccggagcaaaacagacaggggtggcatgatgcttagcagcttgggacgagatgacaccgctataagttac  
taaccaccattaccgagaattgctgtgtccaagaattctttaccctgacatgatggcgaatatggcagcatctgaaatgacagttgt  
atcaattccagcatttgaagacgcttcgcatagcatgggctccatctgcatgttaggaaatccttctgcccagacaacagaaaaactttctctc  
tttgcggcaaaagcgaagaatgcttcaacagtttggagcatccctgagttagataatttactaaacacagttagacaaagtaagctatatcac  
aacatactggaaatgcaaatgatccatggattgaacctcaatatccgttgaattttatctaattcatcaattatttctgaaattctgctatcagcac  
agcacgcatatccatcccagtaactctgctgcaccgagattttatgttgagaagaagcttcaggaactggcttccaataagtttagcatt  
gaagagtacattgaaaagaatgggctcgttctgctccaggtggctcattgcagcaaaaccactactggagaagagaccgatgaagtagt  
agaggaatcttgcctttctttattaacagtttcttctcactgaatttagcaagtcttggattcttccagcatctcgaatgctcgaatg  
atgttccgcaagaaaattctgaggccacgagttagttttgaaattcaacaatattgagcacataccactaggctgagctttcaagagaagat  
cctactgctcgaattgatccaaaagctgatctactgtagaccatcgcttggagaatgacttgcgattacaagaccgtctcaacagcgact  
ggaaaagtttaggacttctcagcttcaatcttgaattaaattgctgaccgagatacgtatgttctatatctttgagctatttcatgaaa  
ttggtaaaagacaaagtgtttacatggataacgacagggaccgtaattttattcattcgcctgatcttgcgaatcatttcaatagtcacagta  
gtctttccacacttagtgagcaatgttactcatagttaacgaagtataccacattgcgtaaaagaaaaagacatcaaatttaaatgtttgatg  
gtgctgtccaaggaactttaaattaccagatttggttcaacgagataatataattcgtgatcgaattttgagataaaacaacatgaacgggg  
aaatagattaaataatcaagaaatgattggctcataatcttcatggaacctaaattgtgtgataagaaatcgatgataaaactatataaac  
agctagcaatcctcatcctagcctcagtttgaagatttggcattgaactaataagcttgatccttgaaagagcttctgttagcaaccaggca  
atggagattactattaatgttgacacatagtaattactctcctaactcaatatcaaccaactataaagcaattacagttgtttgtctattcggct  
atataaaaattgcagatagcttccatgaagaaggaatcttgcctaaaattataccattttgtcaattgtttggcttctgagttgaagtgtttg  
ttatacataaaaagttccgcttagcgttactttggacatatcacaggaatccatattataagacgaaaagccatatttggagaagatcccgt  
agaaagtaataatgaacgggtggcttagtggtcagcttcaattcctgtatctgatgattatcaggtttatcgttactggatatctatgtcgtg  
atggttttctctgtttacatctcggcatalatcagagttttctgtgacagaaatctcacatcttatataattgtgtccaacgattttctggagg  
ttgaaattcatataattttgattgttgatttctccggtagctttaaattctttgcaaaatttctcctaatttgacacggttggctgtgctat  
aatgaattgaaaacaactaaagttgatcatcctctacgtgattggacttggttatactacgtgtgtagcgttggtaagtcaggaatctgggt  
aactaaatggaatctcgaagcaatcatattaagtctgaccagtcgaatcttcaatctctcaatttatggtttaagactttgtgtttgataac  
tttcagatatagttgtcggatgtctatggatcgtcctttcaatagatcattgaacctagctggataaattccacgaagacctcctgaattgg  
atggatcatgataaactaacaatgaattgtactggcagttttggcgtcctgtcctagattttatgatttgcattgttattgaaataggga  
aaagagtatgtccctcatgaatacctgaagttctttatggatgcatatttagtctcaagtaatcgttgggtcacgattcatctttatattcata  
atatttcttaactacatatgggtcgtcagctttatggctcggagtcgatgtcaattaactcactttttcttttaagatccaacgattctcatc  
agtttggaaagatttttgcacgggagattcatcctgtggaacattatttagttgaatggaataacaattgtgagtgctttatagtatatttga  
tgggataaattctcataggtgtgtgaattgagatggtaagaatgagtagttgcacactttttaaaagtcaattgaggttggatggcatattc  
actatatgtagaatttcaaaaacaagtagttgactagttgacctataaactgtaagggaaatttggccagctcactagcgaacctttgtaactg  
gaaatttactaaaagaatttttataaaacggtaccaataaaaagttataaaaaagggaaagcctacagcaccggattcccatgttctc  
caaccatagtaactaacgagccctcagacgcttaactgagtgatcggacgggaactgggttttcgcttaggtgtggcctgacaaactattg  
tctttacaacagttattgtgaattatctgacggtttagttatattgtgatcatatttacattaatccatagaatagagtttctgcatcatcgt

gagtgtttaaaaatctatttaacgatttaaattagctcttcttactcattctttttctgtttatcttttgttttcacgccttaattgatcatgttctc  
gtcacatggaccaagaagaagcatataacatcattgtttcaacgaattttatagctgacaaactagttgtagattgaatgttctttaaattgtga  
tttcttctgttttattctaactcgagcacaagggagcgttggaaccaatatactctatagcgttatacaaaatcaggattttggcaatatatacc  
gtgttaaattttgtatataatggaaggaaatagttgaattttcttgagtggtgagaaaatagaaatggattgacaaatcatcattttttgtgatt  
taagtagtaaaagtactcttataggagctcaagtaaggttatgggtgctttatcaagctccattacttcaagtgaactagaatactttcaacac  
agagcatggtagcttactattacttgaagtatcttgaacccttgccttgaatgacacagacttggaaacattcttctttttataactaat  
gatgtagttaaacacaccttgatattctcaagcaacacatttaaggagataacttaaggaaaagctgacgatgagaattagcgattcacttggg  
tataaaaataagcaggctaatatttcttcaattatatacttctttcaatgaaccgttagttaagaggtacaaaataaaaatagaacctcttag  
tattatcacctttaaatacaggagtataaaaaataatcttatcctatagtcatagtacattctcaacgtctgtagtagtagtagtaaaaagctgca  
gaatgtcttactatttaattgaaattattacgggtgaaaagcttgatgttgaacctattgtattgtctgtggaaccacgggtgctgaaaaatccg  
atgttgctgtccagctagccaaaagtggaaacagaagttatcaatgctgattctatgcaagtgtatcgagggttgatagcagatacaaaa  
atatcacatgaggaacaagaaaatgctactcatcatctcatgtccttctaaactatgatcaagaatatagtgttccaatttgaaggagcga  
aggagaatcatcgatggctgacgcgcaagggaaagttcaatcctagtaggaggactaactactattgacgtctttattgtttgaagattca  
cccttctcaatgatcctcttctatgcataaagtcaaacatcccgatgaaggatataaatgatgaaaatgctgagctgatgttcttctattg  
caaaaagttgaccactaatggcggaaactggtatcctcgggatgacgcaagatccgcagaagcttagagattttccacacgggaaagc  
ggcgtccgatatacaagaacagcttagcataaagaagtaaaagttgaagtataaacgctatttttggcgaaatgctggaatgatgtc  
atcacatgaggaacaagaaaatgctactcatcatctcatgtccttctaaactatgatcaagaatatagtgttccaatttgaaggagcga  
aggagaatcatcgatggctgacgcgcaagggaaagttcaatcctagtaggaggactaactactattgacgtctttattgtttgaagattca  
cccttctcaatgatcctcttctatgcataaagtcaaacatcccgatgaaggatataaatgatgaaaatgctgagctgatgttcttctattg  
caaaaagttgaccactaatggcggaaactggtatcctcgggatgacgcaagatccgcagaagcttagagattttccacacgggaaagc  
ggcgtccgatatacaagaacagcttagcataaagaagtaaaagttgaagtataaacgctatttttggcgaaatgctggaatgatgtc  
ttgatcctcgtttggatactcgagtagataaaatgctacatcaaggactcatgaatgagatacagagcatgaaatctgtcattaatgaaaacgg  
atttacaccagatcttaccagaggaatttggcaatgtatagggtttaaagagttgaaacctggttccagaattcttctcaagaaacattccaagca  
tgtttagataagatgaagataccaccaagcaatagccaaatatacaaaagaaatggatttgaatcgacttttactcttctgtctccgaaacaa  
agttacgaccgtcgtctattctattttcagtcgcaaaactactaacttcaaaaaatggcacgaacaagtagaacgttcttcaatgtgtctctgt  
ttttcaataatcaaaagcttctctatgacagaagaagaacaaggagtttggaaaaagttaaaaaaccttcaaacaggataaagata  
ctttcagcaaaaattcacctgtgatgtttgttagacaagactggacatcctttgtgctattggtagaatgatggcaaacctcatcttcaag  
cgaaaacataaaatgacagttcgtcgaatgaaagagcagccactcgacaagagcggattgaagctgcaaaagagcagccatggaaagaa  
gaaaggagactgcttagtcttctgttttgggttggattaaatcttattggtaataaagggtataaggaacatgtctcaattactataaatt  
ttctattcgttaacgacatgagttaccggttatttaggaatataattctctgattcaaaaagaattacttcaaacatcaaaattcattttgc  
tcaattcttcaatttcttctacctcattaacctctttgttacttttaacgaaacgcttgcacacagatatttcaataaagcgaatagcact  
gatccttaccaaatgaatctcattttactggacaaaatagctctccttccctattttgtaattgatatcgccatctgcaattcaacctttgca  
gcatataggatccaatgcaaatgttgcgattggtcagacaaaagtcatttaaagggttcttactcttctgtggctatgccacggtaaaga  
aaccttcaaacgattactgaaaagatcgtccaaaggttgcgcagaaccttctgagggaagtttctgctccggtgattatgtgacaatca  
aaccaaagcattgatgacacagataattctggcggcgtcattgaagttatgggtattggtgctgaaagagatttgataatcgtcaagtagt  
ttgactttggatcacgatgtccaaaatagatggaagcaatcagcgtaagtacagaacattgaggcttttgcgaaaggcagggtattgatt  
ctatctgctggtcagggcattggtcatcagattatggttgaacaaggatacgaatgcctgtagcttagctgtcgttagtattcacattcaat  
acctacgggtggcgttgggtttaggcacccctattgttctgacagatgacgtgctatttgggtacaggccaaacttgggtgagattccacca  
ttgctcgttgaatcttgttggccaattcccaagggttatcagggaaagatatactgtctcttctgtggtgcttcaatcatgacgaagtctaa  
accatgccattgagtttctggtgagggcctaagcagtttgacattgactctcgtcttaccattgccaatagactacggagtgggggcactctc  
tgggttcttctactgacaataaggtccttgaatggtacgaaaatcgtctcgaatttttagccttaatcatccaagagtaaccgcaaagcacttg  
atgatgaaatccaatccaattatccctgatgaaggcgttattatgctaagtatcttacttggaccttggcactcttctcctgctcctggac  
caaattctgtaaaagttacaattccgctgccaactgaaagggaatattccaataaaaaaggctatttagtttctgtacgaatggccgac  
ttccgatatacatgatgctgtaagtagttcgcggaagaaggttctgatggtgtagaattctatgtcgggtccgcatcaagtgaagtgaggg  
aggcagccaagaacaatggcgattgcaagttctatcgatagtgcgctcgtctcctgctggttgcggtccttgatcggtctaggtaccgg  
attataaagggaaggtgaagttggaatcagtgccaaaatcgtactttaaagggtcgtatgggtagccgtgaggcttttagcttatttagcttctc  
gctgttggctgcttctgctatttctggaagattgttctcccgaaggatttaaggattctgttcatcaagttctgctattgatatactgagaaa  
atgaacaccggcagtaattcaatgaatgaggctggtgatctgattctgagactccattattgaaggttccctgcttctgtatccgggaaatcgt  
atttgtgatgctgacaacttgaatactgatggcattatcctggtcgttatacctatagagatgacatatcaaaagaagagatggctaaagttgc  
atggaaaattacgatgctgattttggaagaaaacaatgcctaatgatatactagtaagtttcaactttggttgggtctagctgctgaaacaag  
cagccactgctatattatctcaggaattcctctcgtcgtcggtggatcttttagtgatatttttaaacgtaactctattaataatgccttattggctg  
tcaattgccggagcttattcagaaactcgtacagcttctgcaaaagagctccaaagaacttactcgcgtacaggttggcatctgaattgggatgt  
cgtaaaagccttggaaatcagtagctgctgatgaaagaaactatcctggcgaattggcgagcttgtaactctgtacaaagcttttctgctcgt

gaggcttgaaggctgggtaaacatgaaatatctgaatcctcataattctaataatggcattttgttttctgtttccttagacttaactttcta  
tagatggtacacattctttcatatctgaaatgttgcttttggtttggatagcaggctttctgtaataaataatgaatggtatagcattctttttatg  
tacataagagttcgaaaattattccagaaatcatcaacttttcattgcaaaccattcttgtaatgtatatcaaggatctcatctttgtctgac  
atattatttagttttgtttttgaaaaagcttatcttgccagattctgcttcagaaaaactttgatatagaggtttgggtgtgttgctataca  
ttctggtaaacattgggtcagattcggcaacatcggcacttgaataaagcctctcaggatcctcgtctttcatagccgtaggggaacgtcgt  
ggatatttttcttgaccaggcgccaagctcaggctgtcgagagcgttgggatctttccgggctgcattacgttggcgacgagcattaaagta  
atagttgttactgaatcgtttgtttcctcaaccaaccaaagtcattgactcctccgacagagccgcttaaaagcattaatatgtaccgtatttgta  
aatcatcatcgacatgctttacttttgggtggttagaagcagaatcttaataccccgaacagactcagatgcagaaaataaataatagagtctc  
ccatagacatccaataccaatctggtttatttttcttccaagatacagcagtaattgaatgacgaacgctgttttgagcattgaaagtaata  
gcatcctgctcaaagtaagtcatccaagacaagtaacttccattgatattcagtagccgctgttcttaataagaatgttttccggttggag  
aaaatatagcttcccaccagctcttgagtggttacctcgatagctgatgtaggattttctgatttcttatgtcccatagggatagaacatca  
tcttcaaacgaccaagaaggtaaatccatcttgaataatthaacgaagtagcgcggacttggatgtgtgagcttgaggaaatcagagat  
gggtgacgagttcgggaacctttgccaaatttccaaatttccatcatatgcagcagttacaaactgggttagatcaactggattccaagcaca  
cgatttaacggcgcttctcgccattccggccctgacattttcagatataagagaaatacctcaatttgcacttttccggtttacatccatataccta  
gaggatattgtcagcaccgaggtcagaaagaattgagcactatttgggttccaactaccgtcttctatttctgaaatgtgaccttctgatggtacat  
atctcgtatgtactggtcacttttgcattttagctatataatgttccattccgatcataaaggatggccgagaatgattaataaggccaaaatt  
tggttttttggagcaatcgagtttctttacagggtagcagcctacattatcagcatttgtgtctgttggatcaatgataggaaaggacgaggatg  
agaggcgtctaatccgcaaaatccaacaacaaatcgtattatctgtagatccagtgtagaacctagtccactgttatcaaatgttgttggat  
acaatctatgtaaagagttagaacactcactgaaggttatcatatgagaacttctacatacctcgaatgactaggaaaaaacctgatgagaa  
caggaatacctagctcagaacctacagctcatcttactatcccctcagagtcagagtcagagtcagaatcagatttgaagtatcggca  
ccattatccaaggaaacttctctcttggatttttagctttaaagctattacaatcttctggtcgagcaaacgctctactagggcagcc  
gcgttatgagattgagctgttttcaaaaagtaaaaggaacagcttctacaggttctcagcaattggagagctagaaagactgacatgaaaatt  
tctattcgataaaatcccataaatgaaacttactgttctgcaagtgctttttcagatttgggtgaggactccaagacaattgagaatttcaa  
gaaaaaacacttttttgaactgttatatcctactaaatacttttatagttgactcgtaaattatcgttggcattcttgagagaaatagc  
atgtcatttcttttgttagttgctgcaaaagtgctgcaaaaagcgggtgaatagctctatcctcgtaaaaactaaattttatccaatagcaa  
ctttcttttatgctgtttttggttttctaataaaaaaaaaacacccaaaataaaaatcattataaaaaagccttattcatggttctcactttatgaa  
tttgaaggcctgcagcgttaaggaccttcttttgaagaagatgcagagatcactaactaatgaaatgattagtagcaggaagagaacatg  
cgttgcaccagaagtgattgatttaactgaagagatccatgatccaattgcagatgagaagtttcagaagtgcttttctggatttaactaggat  
atcagaacataggcctagaagaagcgtagatttgaagtgtgttgcgaatgaagagaccctctatgcttctattccggaccagtaagcc  
ggcctcaataatctgtaggcgggtggcatttttggacgagacaaagaagaagggtcattacagagattaataaatcattcttctcgaaaacc  
aaccgagtcagcaaacagctaccagcctctggcttacttactgatgtaaaaccagatgacatttggatgtattcaatgtaagcggaaacta  
gtcaataacggaacaacttcaatattgcttcaaagtggtggcatgtgttctgttctgtcatgtacgaaaggtcttcaagaaaaactcaaccatgtc  
cagtgactcattgtggaaacgcttgacaagaaggtctcttttctctatataatgaagcttctacagattttatcaccttttggattttttat  
actcatgcatgaaaacaggattcaactatagagcttgttttgaagaaggtttacggtaagaaaggattaaagagccaatattgtacagaa  
aaaatactatgtacaaacggaaataaaagatgaaatcatagggttgaaaaatgatggaataaacatgtttactcgaagtaaacacagcaag  
taataggcagaatattacttcttttgaatttgaactaaaattacatgcaacgaaccgaagctccagattattataagactacctaagagaac  
tgtttctatagcaatccagaatctgtcaacttaaaaatattctcatattcggcttttggcgagagatacacatacaatccttgatttagtgatca  
taataagttatgtagcttattatgaacaggtataactaatatggtaagtcttctcagtcacgaactggattgaatgactttggttatgcaac  
ttctgataacaaggacaacgatgaagcgtaaaggaaaattgataaaaaaataattgtgagaataaaacagtcagttcagttatgttttttaa  
ttgattgaaataaccagagtagatcgaatggttcttaagcgaactttaaaggtacttattcagatgataagcgtcatgcaacaaccatttt  
aatatggcaataaaaagcaaacggttattgtatagagtgaagtcttcttctcctgaattatccaataagatgttattcctcggtttctaagt  
tctgtatctaaactattataatagacaggcatttcaattaacaagctcattaatgatcattgaatccctaactattcttctatttttcttgaatgat  
ataaaaaaaaaacagaataaaaggaaaataaaagaaaattattcacgaaaaactggaaaacactagtagggagatgtcaaatcatgttgca  
tattcagtaacagtgcttacttattcaccttggaaatctcacttgaagatgtcaaaaactctacgaaacgaacatgctttagtttgggtttataa  
aattcaattgtgactttttataacaattttgcgatattggttcaaaaaaggttgcctctctcgtaaattttggaactgtcatcttctgacgaa  
aacaattgacatctggactagcgtagcgttagttagacaaaaatacagaaagcgaagatatacagcaatttattggacggggatggaac  
ccggatccactaggaatacacttcttcttcttagatttccagacaacaattcagtttccaggcaagctacagtgatgatgatgatgatga  
gaccttcttctgtctccacgagtagcgttctttaccgaggaagatgaggaagatgaagtatttaaaatcctgaaattcttgatttctcaat

cgaagctcggacaatgggcgaatcaattgacaaaaacacttcagactaggaaaaaggtacccgagaaaccaaagcaccgaaggtttttact  
cggatattgctgtccgcctcatattgcatgcagaaaagcaatggaaggcttatctcatcattccgggcatgaccttctgactttgaaaagtc  
tctgtcagaagcaaagcaggctattgataaacacatctttccatgcctgattcaaaaggctcttctgggtcttactttgtaataacgatcaagg  
agaattatagcagtttcaagcctaaagatgaagaacctatggcaaatgaaatggacaaaatggtttcacagaaatctgtttccctgc  
tttttgtagaagttgtctaatacctaatctatgttatcttcagaagcggctgtcttttggatcgtagccttggctttacatcgtccttacac  
cggagtagtttcttagcttcactacattcaattatgactatttcgctcgaaaagcctttcttctaaaaacaaaagcttccgttaaagcttgatc  
ttttcaacaattccttgatggctatacttttagcttctcagttcctagagtccatccatggccaggcaccagacatcgagaaacatcgcgattatgca  
gagctgttggctcaagccaggactttgacatctttgatccatctttggctgaaaatgaagttgaaactgacttttggacagaagacatgcgcctca  
agtttcggttgaaatcgaaaaactgtgctattagactacctgatgcgtaacacagatcgaattagacaattggatgattaaagttgttatgac  
ccttgaacgatcccgaatactcaaatccgttcatatcctttcaaaatattaacacctgctatacctcctctcctatgaacttttcaattctacac  
atgatttctggaagggtgctcatttcatattggtgctatagataattctcttgcatcttctataagcaccctgattctggagatcatttccctatgg  
ctggttatcattaccgcttccatataactcaacccttactgaattactagacaactctttttacaaaaattacaagcagagaatgggtgggaa  
agcgtatcggaggaaactcgtaatacattttcctaaagatgaagatttgacgaaaaatgtacaaaaatcagctttatttagttaaaggcgaagc  
ttataatattgtcgaaacctcaaggatccttctacaataattatagacttactgatcgacctaatttatatgttggatgatattgtcaataaaa  
agttgatgagcttgaagacgatcaaaattgaataataactaatgtcatggacaatggcttcaagttatgggactgtgcaaccgcttccag  
tatataccgcaatcgagatgactctacatcgactatcttcttccctctcctggctataaattactgaattaactcccctaaatgccaactctc  
gcatacatctcctctgtaaaggaagatataacaccgggtatatttgaacgtttgctatttgcatcgtcaaatgcatttttcaaaagtgtcaaaatc  
gtgctcataaagtcttctttcatttctaccattaataaggacttcaaaagtctaatggctgatttacttttagagcgttgctgaatcttattat  
ttctcttagatgttgcggtttccgatgcagtatctggtccaattgaccttggatagacaaggggaactctggttaattgttctagttattct  
ttgtgttttctcattcgattatggaccggtataaataattcaagttaccggcaatgtagaatcagatgtcaatgtcaacgcatgtttaaactta  
ataccatagaacctttttatcttctctataatgtcttaactaatataggaagtaccaagttgcatgaactgtgtgctcaatgggtttattttaata  
atagttacgttactaaatataattttcctttacctgtttcattttaactgaattgtatatacttaaatgtgaaaagtgtgtgctttcataaa  
ggatttggaaatgagccacacagatttgaacaccttcttcttataaattccttcaaatcaagtttcaaccttcaaaaacggttaaatctcttctata  
cattaatattcataaataagtttcaatccgtgaacctatcatatgaactgcttctgaaataatacgggtgcttttttcttgatcttaatttatac  
cttgatatttcttcttgcaccggaagattaatcgacagttaaaggcgttttactgaattattcattcgtgaacaagaattgcaaggcgacacttgg  
ttactattcttgttcttatttttctcatcaataaacatcgctactgaaacagtgtaattgacagcttttagatcatttaaataggctttaa  
aacctgattttactggcttctgtaacaggaaggaaaaaaaacaacttgattatttcaaaaagtttgaattcgtttatggcttttctgtttc  
cctgtttatttacacagctaagacgaaactaactaaagtctctcaaaaataaataactttcctaaagggttttcttactttccttattttattac  
aaactcagaaattcacaactaatttaattacgaattgcttggggcagccgttagcttcaacaagcgagactatgacggacgatacggatcggcc  
tataagtacgtatgaaatgaatccagcagacttccagaaattccttttaaacgcgatgactcatactataatgaatgaaaaagaagttacata  
ttcgaagcagatagcctcctcctctctgctgcttccaggacggagcactccgaaaccttggagaaagatattccaatacctaaatgtaacatt  
tttctaggatattacgtggattctttttatgtagcgttaattcagttgcctttatgtttgatcttattcattcattagctcctcaagacaa  
gagttgtgaaactgctactgtatggccttctatgcaagtttctagactttgacaatcgatatactgtttgcagacaggtatacttttacctta  
ccgtgaaagaagcgtttatggaaacgataaacgacgggtgtaccggtcttttcttccaggaaatgccggaagtacaacaggtaacgcgct  
ttgccctcaagcagcaatgtattgtgatgcagtcgagaagatccggaggcagcgtaaactccggaaaaaggagcttgattcttctgctg  
ttgatttaacgaagacttctctgatttccaggacaaactcttgaatcaagcagatgtcaatgatgccataacatacctttccttctg  
cagagtactcgaaaaactccgattatccaacgacgaatccttaccgctcctactctgtaattgatttgggtcactccatgggaggaatcattg  
gtcaagctgcattttctcaaaaaactatgaggaggctcgataaatactttaaattaccttagctgcacctatgctatggcgctccttctttgatc  
gcaaatggctgaattctatgaggccatataagcactggttaaattcgttttacttctgctgaagaaatccttgcgacactcttctagta  
tccgttctggaggaggttagacacgaatattgtcctgaatattcagcagtaactgatttgcctcctcgtcgaataacctcaggttttacttctg  
ggcattccattcgtttgggctgaaattgatcaccaggctatggcttgggtgaaagtttcaagggtcttaattcgtggtttgttgcgattgtggat  
gctagacaacctacaggaacagatcacttctgaaaggaaagagctgtgtcacatacctatattcaaggtcttcttggacaacgatttgact  
caaatatctgatcctgtaagctgcatacaaaactgaaatgtggttaataccgttgtgtacaataatgagcccggtaaaccatttatgttagatcaat  
ttgggacaagcacaatacgtcagcatgtatcctattccaactgtccagataatcagatattttgagcttttaactagtatcctatagatact  
gtaaaactaaagttaaagcttggcttctgcttctgatccgaaactggtacatcattgccggaattgaacaagtcagaatctggagaaccttg  
cccattgttgcgaattattaagagatgcgattacatttctctgcatccagaattgacaccgatactccttacagcggtaaggattttatacttt  
aaactttcaaggagcaacttaataatcacttaatttggctcactgatatttgatggagccaaatgatcatttttagttgggtgatttccaa  
taaatcctccgatccttttagtataaagaagctcaaaagcaactgttaagcgtggaatcacttttctgttgatacatcaactcattgtccaata



aatttcagtttctgggtatacaaaagttctttattagcttatacaaaattaagcttagttatgagcttcatgatgggaaagaattacagacaactttcacc  
cctatgttgaacaaagtttagaatctccttatgaaacgaaattctactggaatgtaacagaaacggacatttctctacatggaatttctccattat  
ggaatactttggcaaggaatctgaaaagtcgcttgttatggaattcattgcaaatcttttctcaaaaaacttcatgtaacttacttccggact  
attatggtagtgcaggctgttattgatgcttactgctgggctgcttccgggtgtaattgttgctttgctgatactgccaattccgctat  
ttccactacggctcaacatttctgaacatgaacacggcactagaaatcattgttctgtagaggttggtaaagctactcgttttgttccattctctcc  
atagtcacctcctactcaacgagtcgtgtatctacggcttaccagatggtgctgacccggatagctcatggcgggattccgctgcaatggtattga  
attcattttggaacaaaatcactgttatttgggttgcaatcacctcaatttgggttttagcacctattctaacgtttatgttcggtgggttagtcgtt  
acctgtacattcatttttccggtttatccatattcttcttacttctacggctttatttaaaacttcgaaagcttccataaaaggaatagcacaagc  
ttttttatgtacatgaaactaatatgtctttctgaaaaagagagataattctgtgtgaaaagtgctgatcttagtaaattgacacttcagagg  
cagcttgaatgctatataatgctaatccgtccctagcatatacttacggaagaaaggatttcagacacggctcatttcaaatcattctattttt  
atagttatgaccgttggcgtccagattgcatatgttattctgcttctacgcagctgtgactactgctaaaagctgttttggcaagagcatgt  
acaaggtcaagtcatcatcaggaaagccttggagtttctcaactttcgctaattggtaactttttgatgttcttttagctcctatagattttcccg  
tgcttttagtatgggcacgaaacatttccacgattggtatattccgttccctacgcatcacaatttttctattatacctttatgataatgacaga  
aatccttcgaaaaggtaaactacctcctcgttgagcgtgagagtttattcaaaataaccttctccttcttcttctgcttttattctttaattatg  
gtgctgaaagccatacttaattcataacgtggtgggagcatatttctttggctcatttcttatatgcaaaaaatcagtttgcagcaatcaaac  
cgatcatgaatactcattggatttgcagtggttgcatttgaagtttttttaacttactatgctacacatgttctacttcttcttcttcttctta  
cttattaccttttaataattgtctgaagaccatattaatttactttgtaacctatatttctggagatcggcattttgtctaggaacaagtatattaat  
tttacttgaagcttattagagatgcaaatagtaataagaccgggtgactattagatttaattcatatataatcaagcaattgagaaaatttgctt  
gttttttagaaaagccaactggtgttggacaatgttgcgaaaggagctgagctacaaagtaccgtagatataattttatcagaaaaacaaggaag  
ctttctcagatgtgtcaggaacatattggagttatgcaattgacgaactgatataatcattaaatataatagaggcagctgaattccatgcaaatg  
aaacatataactcctcgtatgattaacaaatattcgacaaacagctaaagggcgttcgtaacttgaacagccttcaaggaagctgaagtaaagt  
tgcttaacaagccaaaattcctaaagtgctcagacgggcaccaggaagagaaccttccagttctcgtacataatctgggcctatggccccttatt  
ttgacttgcagaaacagctacttttagcttttgaatgccatccaagggaaatttacctaaaagatctataccctgtcatctttgctccacatcgtt  
tcaaagcaagcagtgtttcttagtatgtctttcaagatattcgaataaagttccctgaactagtgttcttcaatgaacattctttccacttga  
gatactgcaatacgtatgtagagactatgatcagaataaagcattcgcacatgtaaatgcaatcgagagcttcttctgctaaattccacgctt  
gaagtttgcagtttccagtgctcatgaatcaaacctttgtcataaaaaataagaaccaaataaaaaatagtttgaattcataaatgtaagtaatagaa  
cagatagttgtctattagcaaggataagactaaacgaaagtaaaacagaataatgttgaataccaatttgaagcaaccgggtgtacaactc  
caaatagccaatagaacatttaatacaaaaaataaagttattaaagttccaattgactactcatcccaattgtactattttggataaggacgg  
gtcttggagaatgtttgacaggtggcaagcggattattgtcttagtaggtaatgactctatataactcgtctttgcttataattttgttcagatgattttg  
aaataaacttactttgcagtttctgaccttttaggaacaactcaattcaggttcttactttgctgagaaagattcaacattctatgtaccaa  
aacctataattcgtaaagtggaagagaattaaatcttatacaatttaagaattaattataacacatttctcagattagaaatgaatcca  
agattcaatttccaagttaaggagccaaatttaagaaacaaaccaaataactaaggaggactataaaacaatatacacatcggcttctc  
aaagaaagcaagataattaatccaagttcgagatgtcttgatataagacaagcatagagaaaagtcattaaaagaaactagaactcgaat  
atcgtgaaacgatgtagaaaataaaagaaaaataaaaccacaaatcagattttccagattgtattatacagaatgaagccattttacaatgc  
cttctgttattgtacactaaattcaccattagactctgataaaatagaaagactagcacctaaacaccaacgaattctttgttggattttctt  
tgccgtatacagttggcgattgttaggaatttcatatccaacggacaaaagggaaatcatatagttcagatccaacaccactcaggttctgcttt  
aaagcacaagagaattttagagagaaagcgtctaaccaagagtcaggaccactgcagacacgatccgctacatacttcatatcctcaatag  
taaattgactaggcatacccaaatcaatcagcctatcataaaagtaactaattaagtagattggagcatcattaacgtttccgtaactttggct  
gatgaacgcggttaaaagaacaggggtccaattggcattcttttcttatacaaaaacttttcagcaaaaggcacggcattgtaaagaagaatgag  
ctaaagaagggcccttgaagcaaaagttacagacctccgtcttctgttgaggaagagtggtgcatggaagcattcaaatggaggcatgggtga  
gtaattcataaggtacatcatcagatctaatgaatttctaatatatactgcagtggtgacaacaatcttatgaatcaactttcgagcttcttaagt  
ccatatccaagatgagagaattgtaagctcgtactgtctgttgttactctaaaacgtacttgtgatcaccttcagatagcttctgctgaggatt  
agggaaatgaggttcaaagacaagttgggttagatccccctcaagatccattacagctacagctcagattcagaagaccaagctttaatgacccc  
aaaagataattgatcgtaacccaagcgtaaacgccttccatggctccatccaaatgaaacactatcttccagccaaaggaaaaggataat  
cttcaaggagatgtactttacggcattcaaatggctcgacttcagactccccggttaagacgaagaccagcgggttctttacggcgataggtg  
aacacttcttatgttcatctggaacgtgctctaatgcaattccaatagaggatttaaggaagcggcggctccatcaggggttgcctgcaaggaag  
ataaacaggctctatcatcttgaagtactcctcctcaattttggtgaaggattacagttgttaattgatatacatgtactctagagccggtggaa  
ccagcatcaatcattaacacgtactgggtgacaggctttgtccatcaaaggaacgggtgactcctgaaatggttctgctgatgtcacatca

gcaggactgcaattgagttcgacgtagtagtagaaaaagaaggagtagttgtagaggggaatgtgttcgttctgctctatttgatgatgaggattg  
ttcgaactgtagatatacgattgagcttttcgttctgaccgaataaagatgggctcttgaatatcattcgaagtgctcagagaaaatgtatgcca  
aacaatgtataaaacaaggaaaagagaaacactaacgaaagctagacgtctacggttgcttaactgaaagctgaaagacatgatgaacaaaat  
gaaaacgaacgtgaactgaattaccaagctctaaacgttcattcgaaccacaggagagatcgaaaataaagaacgagctaaataaataa  
ataaacggaaaacaaaaagaaggtttttgtttcgttacgaataaaacacacacaatatcttctattaacattggactctacactacattg  
accgttttaggacttccaaggtccttaacaagtgccgaaagctgcattagtaataaggatcgatttcaagacagctttttgcttaatgaaa  
aaggcaaaaaaaataaactgaaatacatatgtacgacgacgtataatagctagagataaaacgagaaaaagaatagaaaaaaactt  
tacattgaaaaacaactgattcactaagttatatacaaaggagcagtttaagaattgttttcatagatctcaaagcttcataatgggataggat  
cattggattgacagcttttgaacgtcaggagcatccaagtgcatgaaagggtaaattgcttttctcaccgatggtaaacttaccagtagtggg  
ttcgttcttggaacagaaatcaacaggttctgtagtccggggttagagagtagagaggaagcaaaactttgattagacttgggtattcatgacc  
aggatagctgatagtgcttaggaagtgaaagcaaaacagtgttatgatgatgattcagagcatcaccttcaaaaagcgaccgcaa  
ccagcggtaaaacaaagtgtcctgttaaaacagcacgcttggaggagacgatacgaatgcaaatgctatctgggtgtgacagggagat  
gaagagcttgacctcgactccaaccttgaatgttccctgtctttgggggtgtgggttaccgcttgcattttgcccgaagacttggaga  
gagggaaaagctgttaaaatagcaccgttccgctgcatggtcataatgatgatgctgggttaaaacgtattgaaggtctatctttcgaagag  
actttttttcaaaataggaagtacactataagcatcgtagtataaaaataaaactagttaattacaggtctataaaacaccttggaaagacgg  
acttctgtctatttgataactatcgatacggcatctataaaccatttcttaaaataactaccaaggcaaaataaccgttcttgggtgacttct  
atattgacttacgcggatggttcagcaggatcaacaatagcactcacgctgttttctcacaggttaaaaggttaagcataattattgccagacccc  
ttccacatccaataggagtaactgaaaagacattgctaaacgtttgagagactgaaacactttgtaaaaataatagtaaccgttctgtagaa  
aaggtttgtcttttagaggtgaagcttttagttatataccttatcgttagcgttagaataggaattttgaatgttctaagaacgtcagtatgat  
atcgggttactcaattcattcagcaataggtaacgctggcaaatgttctttgttttaaccgaacgttaaatgtttcgagtagtctgaagaa  
ttagattggtcaataatcaccgctttgttcaaagaataaacaacaaaaaaacgaaaaggtataaaggaaaacaagcttagtaatatata  
agaggaaataacagattattacaaggaaggtttatcgaatgaaagcgttgaccctgaaggtatattgatgagagcaacattgcttcacacgt  
ttagacttggcatcagagcttataaaccagcatcttactacataagaaagggaaatccaacactagcgttcaatttaaacatttgacttaaaa  
tagatatacaaaaccatgtccacctgttaatagtaagtaattcaaggattatccagtttaaatattttcacataatttaccatttatacgtt  
caagaaaacctcatcattgattaataaaatagaaaaatgaaaaagatcccatacttaacagtaaaaaaccaaataatcatgtcctgaaaggca  
taatgaagctgaaagtaatttacggaacataccgatgcaaagataaattggtacaaaaacctaagaaaagtgtagacataaaaaattat  
accttactaaagtaagacgctaaccatcagattaattaccaagattcaatgataaggtagttatcagcgtcataataaggtgaaaaaattatt  
gtcttgagaaatgtaaggaatgttgtgcatcattcagcttccgaaacacttggaaatctttgtcggatctagagggaggaacaatccaag  
aactaaaattgcaattgagcgtaccgcatccaatattcctttgttcttacttctgtggctacataggcactgccaccacggcttgatgattt  
gccagcatcaaacgacgatgggcatttttttttgacgctcaaacgctgatttagagagataaaatctgaatggcttctgttcttgacatctt  
tggttcaaacctccttgacaaagtttttactgaaccattcaaatcaggtatttccgaaatgcatcgataccaattttacctaatttcatggtta  
atcttcttctgtgcttctttcagcttctataacataccactgcagcagaagcagcaatcccattcctaaaagaattgcagatgcctaaattgc  
tttgcagtttctctttatattcaaaacgctaccattttataaggaaacttttagaatataaataaaactaataagtatataaaaaacagg  
tttttaagccaccgaaatattcgaagtgagatgtagtgagaaagatcaatatcattgctgggttaaaacatagcaattgacacgcacgaa  
ttatatttctataataagaaatagaagaattattaagtaatacatagcttcaataaaatcttgggttaaaataaggataatcggattcctg  
cgaatcattaattcatgtagtctgatgatgagaagtaattacaactaataatgctaatattcatttcttactcaataaataagactcctt  
cctagcaaccttctgtagaaatctagacttggatcatcacattgcataatatgatgtgttttagtattttttgttcatcagcgtcgaattgac  
caagtgcattttgcaagctggccttccggcatatttgaactgttcaaaagctaccaagaagattaccattttgcttctgcggtcttccac  
tagcacttttaacatcaccacctgtatccaagatctacttcttctgtgtagatattgtgtgcaacgtggaatatactttgctgcttccctttgtt  
ccagcactcaaaatctatttacaaggttcaaatccaataggagatctgcgattgatgcagccattgtcaattgaaagcagctccttatag  
ccacaagagcacgcagcttaaccatgaaaatcttttccgggaacaccaaattctgatctttagaggcttctgggtttggtcagctctatc  
agcttaacaattaattcattaattgtaagctccacgaaattactcgcaagctgacttcaatagcttcttcaattgtaaagcttgacctgttcatct  
aataatttactttcaatgcaattcttttgattcgcgcatacctttgaggtgtctgcagagaggcaatacgttcataaacgtattaactgtcaa  
agtgtcttaatagcaagaatcgcaagcctttacgatcgtcatcctgataaaaaaatcatgaagcgtttccgatcgttctgcttgcactct  
acatagacttgagcagcatttggatgagtttaataatttgaagaacgaggcaatggacatctgttcttatttgaagataacgtacagaatc  
aagtcataatcagaggttcaatgacctactcatgcttctcataactctcatgttcagcagcagcatgactttagattggcaagcgttcaa  
agtcaaggagttgtagacaacataattcttcttctcataagcagctcgtgcaacctttcacaagataaaacttcttttcgataactgtctc  
ctatattttagtacaacatcttccggttctgttgactgctttagatagcttttagcccactcaatagaccagctcagggtaaatagat

tgagctgctgaactgcggttccgtactgctttctcctggaattcttgaataagtcgttcaaaaccaagatgttcaagtgatcatgtgtaata  
aatacctatacttggagaacgagcagaatttaaacacgcatttctctgctgatatacaaaacttgggtgattataagctgtcaacgtattcttc  
ctaaaggcagcttctaataattcttttgcattcaatagagaattcatgtagagcggcctgctgcaagatcaactgctatgtgcatgtcgtt  
ttcatttccaacagtaattttccgcaaaaactgattggattcatctttgtgaagcttcgaccagctctcgtagcaggacttctgattgaagctca  
aatactgttccaaagacgaaggactcttctgtaaaaactcacatttctttattcaataaccttacacatcaattcagaatagacgatgggag  
tctgattgtacaggaatggtagcgaacccccaaaaggccaacgagagttacgagattatcgtggacgagcacaactgcatcattactgcacca  
agtcatttgcctttaaattgcttctgaaatggtagcggggagttgaaatccaacagaaaccttgtaaaatcagaagaaatgacgcgaatctccc  
tttatctcgtaaagagctatgtatctggaataggagacacggaaaattgatgaatcgttctgaaggggattgtgaactgaacatctgt  
tcatcaattgaaggatttgattaccaatgctgaccagtacataacctaatacaagagagaactgatttgaatataatccatgaacttaa  
ttgccattctcatcaattcagaaggatttttagcgaatttttcttctgtgctgagacctgatagagaaataaaagaatcgtcctgtaaacg  
tgcaaacacagcacctgaagaaaccgacattctttcacaccaattttctatacctttccaatggaatactgatggaactcaccgagtattg  
tacacgcgaactgacctgttggatagacaatcagttcctcattatcattccatccatgccagcaatagacactttatcccactttaa  
gtaataaaaacaggaaaataatgattgaattagtcccctaccgtaaattgttgaatgactccctgtcaactaaagacacatatggagta  
caagggtatttctcaattaaagtctttgtatatttgaatcggatctcgtcaagctaatacattagattcacaactgtagaagcga  
atagatattctatacgaatactcatgcatacctattgcacctccgcaaggagcaattgctgtcgaaaaggcaactgggtcaataggatccatatt  
gtgttcccagattaatctttcataatagctcaaaaacattaaatgttatacctctggtagttagtattttagaagttcccattctgtcatt  
agcattaagttttggaatgttttcataccatagcaggatattttaaataattctcatttctactgaaaaactcatgattttgacttttcatgt  
acgaatgcaggtggacgtatagtaacaaggagaggtgattcgaattacaaggtttcataatagcaatgaagtagtttctatggagttat  
taaataaaaattataaaaaatattaaagtctcaaaaaataggtttatgaaaaggatgaagacttggaaattacagacgcgtctatacagatt  
ctataatggacaagctactgaaagatatagccagtttctatagacaaaacgataaaaaagagtaaaaccaggaggattatcacaagctgaagtt  
tgaaggatcacatcaatccagatgcttctattgtcaagtaattatagataaaatgtgaatattagcatgattgagcaccatataatgcaaag  
aacatgaaagagaaagagctgtagaacacgtaaattggaaaaccaacctcaatgaaacaaccctaaacgacttttccggtcatgaatgtag  
gataggtaggtgaaaaaaaaaaaaaaaaaaaaaggaaattgtgattgaccaattattgtaaagacttaatacaaaatcttcaggaaacca  
gaaaaactaattgtaaccgcagtaataatgatgataacggggattatgttggcaaggaaagtttgatgagggattgggagcagattgac  
gttctgggtgattggactacccttatggtgagaaggatgtttagattcctaaatgtaagagtttatcgttagcagccccgatataaaggcgc  
ttgaggcgaaggttacggaactaccaagaagcgtcggagaaggaacatcttgaaaacctcagatctcgaacaatttccagaaaa  
tgcatccaacacataatgtacatttgcgggtggacaaaagaatgaacttccatcattggaactccatagcctccattcgggcatcaaagg  
agggaaagaaaatcgagataggtagcttagatcattaatgaaaaacgtagaaaagggttctgtgcatatcttcgagcatcatatagaaaaata  
cgagataaggaatggcaagctacggcaaaaacaagtcctgtaggatcgtatcgaggcaagccagccgaaggcaagccaacgatccaaaca  
acgaggcgtacgatggatgtccatagtttagagtattatcataactgtactcaaaatgatcttctattggagacacttcaagttcgtaacac  
ggcggagtggtcggaaaagttagataagcttgcataaatgtcgaataataaaagattgttgtttgtttttctgtagacaaaagcaagtt  
tttggatgatgagtaaaccgtgcaatttccagctccatctctgggcaaaagactgtttgatcaacttggattcagagcatcataaatctgaact  
gtcctgctgcagaacatgctgctgctaaatactctcctctgcatcaaaatctatactgcttaacacggatccaatggagttatcgcgaaatgat  
gtgctggcttaagagtagaaagcaagttcacgtccatgcatatattgttatgaaactaaagaaaaacacgacgcgttgtttgttacgtaaac  
tgtgtaacctcagtttctttaaacgaagaccattacaacttggctcaatactcaggttccgaatagtagaagtagttgaaactattattatg  
gattgtcactaacgagagatcagatgtgttttaaggtacatgaaatctacttgttattttttattcataaatgaaacatacatcttctg  
acaaaagatggcttttattagattcatgtatgtatgaaataaaaggaattttattgcaacctctctacaattgcttctgctgacttgcgac  
cgttccgaatggtatataatggattatcaaaatcgcttagtacttataacataaaaggtttccttgggtcgaatgcaggatagctcttgaatg  
cagctcttggcttcatcaatggaatgggaatgatttcttgtactctgttttcttcttcttcttcttcttcttcttcttcttcttcttcttctt  
aatttctgatgacaagagatataatgattattccagattgttttaacctaaatgaatttcaagagattagtaatttctctgcttataaatgag  
caaaattatataatgcccagtcgaaatctcagactggaagatccaactggctgtggttaaataagattgccttcaagcatttacttagtttctgta  
tccataaacattactagcgtctatacacgtagtacaacaaagccaattcacgtacaaaacaatttccgctcaaaaacattgttacacgggtga  
agatttctgccgtgacaagtgacaacctcatactatttctatgctttatagtaataaaaaactatctgttaacggcgttacttgaatcaagaca  
aagtaaacactggaatacaaatccagaattttcaaaatcagtgatttggagacagaaattttatttttctggaatagaactcagaataa  
ttcgaatcaatcacaacttttcagtaacaacaaccatttcttactccattcacatctatattaacttcttagtattatgcttacgttactattca  
acggagaattggcaatattactagatccaagtagcagatcatttgaacctcattgcaactaaagcactgttaaagaaatataaaaagaaaatt  
agggcgatcggcttaactacatagtagatgaaatctaaaactcaaaatagtgcttttggatggatcaaatattcaaaaagttacggccagtg  
ctgccattatgcaactgctgacgaataggacaggagtgaaatgggcaggatcgttagcagcaagcgtctcaaaagttattcaagtaagt

ttggacttcttattttctgctttagtaaatgactagttcgtatctttttaaactattgtattagcagtcggctcctgaatcttccaatataattha  
gaccttgtaaacaaggcttgagcaaaagatttgtaggttgaaacttaattttttctgttgagcgtacatactgctgcttctgttaa  
atcgaaacacaactattcttattctcatttacgttcgtaatggactccagctaacatattaggctattactccggctgtcgatttaattgaactcatg  
taagtgcatgataattagtaatgtgccggtggaatgaagctcaaggacggataaaagcatactttgaaagcttctttcattcaaaaaactattc  
acaagtcagattactacatggtcagctgctcgcggaaactcgagtttcaaaaactgtactctcattcaacgacttcgagaccacattgat  
gaatctcagaatatgtaaatgaaaaggattcactcagtcagatgaagaaaatagaagaagcatcgaagacatctacactagctgtgaaa  
gttactaaaggaaatcgaaacaggtatgcttggaatccttatcaaattttttgcatttctaacgaatataacaaaaattcagaccatcccctt  
aattaatctttcttcaactccgggtgaactttgagttcagcactgaaagagtcgctatctcttctcgcctgttacaagctcaagcttcttgga  
gttatccgacaacaatttgaggagactcagaaggatgtgcagataggtccaaaattgttctcattataataacctttcaccgttcaaccaa  
agtgatggtccctccgacgttcttggaaggaggaatatcctaaatgttcgggtgacgtaaaaagattcgtttccgaagaaagattcggtatgat  
tgattattgaagaagattgaaatgagggcagatcatgaaagaactcttgtaaaagacttatcgagctccataagtggaacacatagaatat  
ccaataaactgtatgtccatattgtgctacacagtttccggaatgtagacatactcaatcaagatcgctgttctgagctacagttatgc  
agcgttctacagacgaaccttagtacttgatctcgcagacaaagagatgttcttagacaatggatctgaggaataacaaataaag  
attctttgaaatccagacaacagattggattgcattagaaaggtatattggatgtctatgaggaagcatcttcagattcagaacccaatataat  
cggaaatctagatcagcaagtgattcgggaagaatattcaagaaatgagcaaggtaagtgcaatacaacgaaagatacaaggaacacaact  
cgagcgaagaagaatcgtaaatgcaatgcatctttgacattaatcctacaactcaatttatctatcaaccgaatctctctctgttgag  
tatattctgctgtatgtccttacaagaagtacataaaagtcgtgtctgagatgagtgatgaacaattatctgatattgttagtaagctgggag  
taattagttttaaagcgaatagagcattctaaattttaactcaagataatctacaactaagcagaataatagattgtctaggatct  
tcataacattgatgaccttattccattgtttcattgattagttatctacaattcaaatcattaaacaaagcaaactggagaaaatggtatttta  
gattcgaaacgtaaaagaaacacaataaacaactgaaaaagagaagcggataaacaacaaagaaattagcaaattagataatcagc  
taatttcagggtaaagcgaagttatgcacaggatactggatgccatactgattgtcaggaatatattgattgaagaattatcaggtaatc  
catcaagccatctagtaaaagttttctctgtagaaggatgcgataaaacaggctctctatgatcttctgtaatgcagaaatgtggttaagagc  
agccagtgtcgtaggattattgggatgggtcaagcatccaaggcactggcaatcatcatcattgacaatgagtcgaacctgagcacaattac  
ttggtagagtaaagttagctgataatggataggaaaattggaaaggaatattggagttgctttcggactttacaccgtcaaggatcaggag  
gaggatataaggtagcgagaaggtgattaggactaatggaacataagaccattatccaacatagcaaattggataaggaattctggtt  
aggatatagatcatgactagcagctgcagctgcaatggaaatctgagaattggaagaaccttaagcgagaaggcgttggaatgggaatt  
atctttctggtgacctagagaaaagggtgaaattgttcattcaagggtgcaatctggaagcatcgctgcatgaatgttgggatttctaaagg  
gaggtagtttcatacatagggcattatggcaatgagaataccaatgaggcgaagaaattgataattacaaggatgacaattcttgcaagg  
cattgtgtgtttccggatgactatataagccgacactgaaggatagtgataagggtggtgatttaggaacaaatagagaaccagaaccgtccg  
gcttccgaggatggatgggagaaaaaattatgttctgaaacttagagtcgaaagaggttgggagggtaaagatgtatgggaatgatggcctt  
acagcaagaaggaagaaggggcaggtttgaagaacggacaaaagtagaatccctttcggaaaggttgtgagggacttttgattgagatt  
ggggcttctgcattcgaactgcaagtacactttacatgaatatgacgcataactctagcttggcgacactttcacactgactaacaggctcggc  
tcttggtcgaatagggaaaagttcacggctgctgcttgcagctggaagaacgatgaccacgatgactttcatgcaagccatttgcattgtc  
acaaaatcattgagaaagataatagagtaaagggacaaaaaattcctctttaccttgagccaaatttgacggctcgtttactgttcaag  
aaagagatagccttgaaggatgaagggtagaactgaaattgaaatgctggaaggagaatggacgataacctgattcaattccagagaac  
aaaaacgaggaaaaaacgaacgacctagaaggagacaggaagcatagaaaatgtgaaggagatcaagaatcgtcaaaaaactcctattaa  
atactgtcaatatatgtaattcggatccaagcgaataaaagcctttgagataacaaaacacgtaaatgggatgggaattgaaaaatattatc  
gataaaagacataatcggatgaattggtcttgccttgggacaaagtgaagacaaaaatcgatgtaaagaactgacttttaaagaaaaatct  
ttcaaaactcagccaaaaggcttttgtttcaataaaaacgataaaatacaataataggaattttatgattcttacaagaagcctggtat  
aacgtggaacctggaggtcttctcacacgtctgtaaaggaaacgaattgagacagatgaatccatgaaagattttgtcaatgaaactcattgaa  
cagaattaaactgagaaaataagaaaaatctaaaggaatttggttgctagcttctttttgacattgacgaaattttttgtgaaagct  
ttaaagcagacagtttgcagatcagattaattggaggtaataaagcttgaaatggcatcaaatcatttgacgtttcacgagtcgggaacaca  
gcttcatctgtgagggatggaattcatgacgactgtttcaaacgtacatagaacgctatgtagactacaaatcaattatataaacgctt  
gtggcatcaactcaaggcaattctgagaacgtttgagtgattggttctgtttgtaagccataaggctgttctttaaagtaatccgaggaa  
ggcaactatagtcagaactatgctcttttcttacaatggcaagaagaatttattgttctcgttttcaataagaacatttgacatcttct  
atgattgttactaacggccgaacataaaacatgctacatctcggtatcgtaaaactgcaactatgcaagtaagaagtcactaccagccttcacg  
tcacctgcaatcaaaacaaactacgctgacttaattcccgtagacaacgatttataattcgaacagactgctgagaaatcgctcaaaat  
ggctcgttgggggttttaccgacttctgttgaatattcaaaaactttttggcttcgaggacggatgattccgcaaacgtagata

tagaagcgtctcacgagattccgtaaaattacagctgttcaaggttaccagtttgaaggtaaaaaagcatacttaacttcttagaaatgaat  
attttgcctaaatacaatgttgccttactttgacattcgtgtagcagcggatcgggacattatagttattcagggatcaccggaatctgctgaact  
tactccactatcaggaacggtagttctttgccttacggaagcatctctgttcgagcaatctcttgaactgacgggacagatgctgatctcttgg  
cagagccctcgtacagtagtcggactggattcgggcataacaagcacgatgcagtggtctacgaaaaaattggaacttcttccatattctggt  
ggatcaaagactcttctgcaggtaactacgagatccttttcgctgtatgcttccgggtaaatattctgaatccgttgaaggcttcaaagctgta  
cgttattatcgtttaaagcactattgatagaacaggtctcaatagcaggatgatcaaaaagaacatatccgcctcattcgtactttgcccct  
gacgctgtcgaatttacaaaaactgtgagtgatgacacatggcctaacaaaattgagtatagatcagattcccaacgaaagcatatgctatt  
ggatcttatattccattcattttgttctagtagcgttactaaagcgccttccattggtaaaatcaccattacttgaaggaatacattacgttgac  
attgctcatggtcataacggccttctgcttcaaaagatgaggttctgactgtacgttattgcaaacggaggaaattgaggaatcttcagatcatt  
acgaactttcgaagcatttagagcttcccgcacatctctgctgattgcttaccagattgtgaccttgaaggcattaaagttcgccataaactaaaatt  
tcggtttctttacgaaatccagatggtcatgtttcagaactaagagctgccttacctgttattgatgattccccctcaattatttggcgtgctgcc  
gatttggaaatcttctgtgaaaactttgattcgtttaatcagccgttaccagctacgaaagtagtatgatcggctatacagtgattgaatta  
ttcaaacgttgaacaccttcccagtggtactaatacaccaagacggcgcgactccacggaacctaatgtttccgccgaaaaccatcgtagac  
aactgattgctggtcttacggcattggctcaacagcaacagcctggtagcagctcaagcagcattcaccttccgctttagaagattatcc  
cacttttagtttggatcaaatccatctagtgccacttctggtgctatcactaggaatccatctgaacaagtttagctgaattaagtctgctt  
cttcttactgaggctacgcgctcatctattaatgattggagctcattacaaccttcttaccctgggtatgaggatgttactcgaacagagcat  
cttcccgtccaacttcaaccggctaccttaacgcctcctcaacgtcaatcgtccatgtttttacttaccggatgctggactcaacgtcgtcctttg  
ataatcgtcggcctggacaaaatcccgcgtctctccaacttcaacagcagcggatcatttgcgcatatgggacagcttcaaatccccaa  
acgctgctcccatagaccacctaagctcgcgttggcactcatagaaatgcttgaagcgttgcgacgtcgtatgcttccgtcaagtttccac  
gagaagaaactgaataagcacttccatgaggtagtagcactcttacttattcgttggagaacattatttttttggttcaaagaaaaaggaat  
tttctctatatttgttcccagcaatttcatgcttatttgaagaatgttttatttatttggatgttatgtaactatgatgttattgtaattatta  
ttactatttggtttcctttcagaaaagttaaaactcgaagattttgatctcatttttagtctgtccctggtagaagtgaattgttttatgaatagt  
acaaaactaatatgctacaaaagtttgaaaaaattaatacatggtccttctgatgatgaagacattcaataaattcattatactgaaagata  
ctatgagtaggaagaaagagaatcaagcaaacattaaacttactggacagcctttatggtttgcctaaagtaaaaagtaaaaagaacaa  
gagataggaagtgacaaacttaacataacaacatatcatgaaaagtaaaaggcagttcgaagtagtagctagatcagattacccttttg  
attttctcttaggaattcatttccgggaagaacaaggtccattcatataatacagcaagcagtaacaagagcaacaaaataccaattc  
tcgtaaaaacagcttctcctttcaaagaaaatatttcataaatagtaaaagattaaaacacttccgacgatagctaaaacggtagtaaaaatg  
cttcttaccagcatttgcacaactcgaaaaaatccattggtagttcgtttacagaatccgataagccagaaaaatccttattctgaataatcc  
attgttagttccatacaaaagagaaaaacgcctttgcataccgcacggctctatatggctataatcgctagcccgcgtataaatatcgtatgtgat  
tttttagcagatgaattgccagagagggtttctaactccttcttatttgggtcattcatgttgaatagctcccaagttcaataataaaaacaaa  
gcgaaatgcgttgatggaattcatggtggaacaaaataggacattactaggattcggtaaatgctaaaggaatattacgcatcagatgcat  
ttaacgaactgttagcaatcggaataattagtctgctgcaaacgactctgtattctgaaaagtctatagacgcagcaatgagtaggaaacta  
cgtgaattattttctcgaatgctaactcagcgttactgtaaagtctaataatgattttctaaagggattgtatgattaaaaaccattgtaag  
aaagaaattggattgcttattcgaatagcgtgacgatattgaattgaattcgaacagtttaatacaacaggaaagtctactcgcga  
tcgagattcaaagaagtctgtttcaataattatacagcaaacctcaaatttttataatctgtggcatccacaaggaatttttacatctttggatc  
caagcagccgtatttaatacgttctttagagaattgctgctatagccttttagagtccaggaatatttttctatttttctttggtatacaattatta  
taaaaataacgctggtaaatcttaagcttcgacatttatgtccactattaacacatgactactcgaagcgttataaagtcaattatgttttag  
attcgaacgaagacaaaattaggtcaccgcttaaatgtgaattgccttgcacttggcgtgcttttcagctaaggggtccgcacctgtcagcagtg  
ccctttacagcggaggccgggatggacaattgttctgttgggacgtcggtttagactatgctaagaagccagtaacctttatcctcaatacaggctca  
ttcttctgtgataaatgacattgctgttacttctgattctcaaggtggtaagtattatcaaatctcagagtgagcgttaatttagttagtcata  
tcttctgctccgacttgacagtaagctatggaagcctcatgtttctggccttcatctttgaccacgattggtagaacaacgattatgtcaaacg  
tcttagtctttcaaggattgtaaaagccatgggtagtttccgggtctcagcagtcgcgtaattgtctgggattataatgtcggtaagaagtag  
tgcgttttgagcaacctccaattgtgctatcactgtcggctcctggagtggtgtgattcactagctacaacaacaacattatcgctaatggagg  
tattcaaaaagatatacagctttgggattgttttcaaaaagcaatcactgatttagttggtcactgatactgttcgagatatttaataagtg  
aagatggaagaacaatccttacggccttctggatgctactataaactttggtctttaaagagctcagaatgctattttctttttggtcattctg  
atagtttggcttttcttctgagcatcctgacctaaagtgttttaccgggtgaccgctcaggactgattactcgtacagatattcagagaca  
cgcaacaatcaaagctgttctgctatattgaaacaggattctcctgtttctgatttaattgcccgccagcttttcatctggagtacagcttccgacag  
ttcattcatcagtggaagataaatcttttcatctgataattcagcttcttcaacgatagcttccgcttctccttctcctcctcgtacacaaagtagt

tcacgacattctgtcgaacaaggagcggcgaatgcccaactctttatcacgacgacgagaggacatatattatgatttgaatttcagaaaag  
cctgaattatttagatgtaataagaaagcctgaatatacaatcacgggtggacttggattggagagatgtcgattattaagcgcaccggcggggt  
acttacagaagatacgggtgaaaaatgtgtttatgggataataaagctgaaaaagattgaggatgttgttctaataataatgataaagt  
tgctcagtccttgacacggttagagacgttaccagatgggcttcggtaaattgcttctgggaattcttgcggtgactcttgacgaaaatcattata  
tggatacagaagttacgcagatgagtggttcagattaagtcagacgagttattgataaacgtatcaacttaggtgttggcttctgaagaacct  
gttttctccctttattttttagcttcaacgagatgcggaattcagaaaaaatgtgaaatgataagagcgaatgtacgaaagcaatcagaaac  
agtagaaaaatcgaaaaacagaagctcgtcacaatgctgttctttcaccttaaaaactgcgacctagaccatctgcagcgttgttctctaa  
tgaaccgttaactcctgctagtcttgagtttctccgacttcttctgctatggatcagtaagcgatacccagcctcagtccttttcaaccttctt  
ataatccgataatacgtctgctgagacagagagtttgatgaacgctcctgattatcttccatacctacgagtaaaccacaaaaatgaaggctta  
cgattgaaaaacgaaagaattagactcgcacaaactgaaaggttctttagggcgggtgaagaaattggaagatccaaatctcaaggaat  
ctatctttaggctctccaggctccaactgagcattaccgcttaacaagtcctcaatctgaatccaattcttaatgcggcctcaccctttaa  
atctgaagcgaacaatgtggataacgaacttaattcaagccttctagtttaacacaaaccccgctacactgctgcccacaaatgcaaaaacctat  
gagaacagtaagcgaacttaactgagcgttgcagcagctgtaataaggaagccagaagagaaggcaacaacatttttaagcaaccatt  
actgaacttacaccgcaactagattgtcggatcaagtaactgttattatcagtgagaatctcgcgatgcaggaagttcaaaaagatattttcgt  
gtaccataggaatatggagaatgatgctgatcggttggaaaaataatgccttattgggttaggaaaactgcttttagggatgatgtccttcaa  
agaacagcccgcggttggattttcagttcagcgaacccgaactcaaaattaccatctatagtaagcgaacaactgtttaagtgcgaatgcg  
atgcttcgagttcaaaagattatggattacacaaaagtaaatagtcagcttgcgaatgaatggcaactagaatcagtgtaaagac  
gtggttgttacgcccacaaatgacactagctacgggtgaaaacgagactcggcgttcgggagatgatgtattttccagtacaatttaacagat  
gcggttgcgaagtttcaaggaacccaaaagctggatataaaaggttaattttacatcacgatgattatcttctgctaaacctttttttatgt  
tataatgtttgaattcattttttttatgtccaaaaagatttggtaagcaagaaatgctaatacagaactaccaagtacttctactattatata  
tacaccgtttttgtaacctgttttcttccatattttaaagcaagcttctacttctgcttctacgctaaattctcaacaaacggccatatttctg  
catataaccatttagatttggcttgaataaaacttgaaacagcagtagggctcagagtaactgtaaggaagaaaaatactgtatcgtgtc  
ggcgtgcatagaaataaaatccctagattgttagctgttaggaaagcaaggttaataccttgaggagatctagtatacaaaatcttacaact  
ctcgggaagtttctgctccattttgacagaaagtgagaaactccgtagtaataacatcttctagtataaacggcctatccaaaagcaaacag  
actttgtcaatgacgactgtgcaacctgactcaaaaaaggagttcttgagatactccacaaaatcgcgactacagcatcggtgtcaaatgatc  
tgcaatagctgttttttaactctgtataactaagcggaaaagtcggcacgaagttggtgcattattgcaaatcccaatcaataagtgctatt  
ataaagagggggaaagtctgtaaagagtattatcttaattataatgaaattgatccaaaaaggcttaatttctttcactagctgttacttg  
acaataaagcttggaggatctgacgaaggaatctgcttctgactattagcttgaagcctgctaaatctgtgcttacctctcagagacatct  
tcgtccaataggaaatcttcttcaattgtaatggatccatagatgttcttattccaagtaactatattcgtgtcttgcgaagtccattctgag  
gaatgagaggaccgaaatagcatcaaggagttgactgtattaatgacgaacagaatagattattactcgtgcatagaactgaagatttca  
gtccaacctgcttcaaaacaattctataatgattgtcagtaagacaaaaataaaagtcgtactatgtcaaatgtccatactgttcatccgaat  
ttgttcaataaattctgcaactcctgttcaattcaagaagggaatctggcttcttcatgttcagaaaactttagagatattttctgtgt  
tgaatcttctccatacacaatattgtaacattaaacgacacctaataatgatgattagcttttataattgaaatcagtgactgttttgcagat  
acgatggacggtaactcttcagtagaaatccgcctaccgcttctatccaataataatattgctttcaaaataaaatacaagaatacaagaatac  
cgtcgtcaatatttagatctgctagcaaataggatgtgtgtgtgtacctttgtcctcaacacctcagaatagaggagacaccagggtggc  
accggtttctaaagtctttgttacagaggttatttcttattttgttacagaaatctttagaattttgctgttggatgagctctgtgtaat  
cgttcaaatctttaaataactaccattttggacgtgtaaagattgaagtgcttataatccataacttcaattccctcttttttagaaattca  
atccttgaataacatcataagcttggcccacagatagaaaagtcgaagacaagaccgcttctggtgtaattctattattgttcaattttttgg  
atacagctacatgagcataagataaccagtgcttctctctcttatttgggtgtaaatcccttttggttatatcattcacttttgattttggtttctatt  
caattacaagtcggttctttttttgtcagattgggtcttttggtttactgtacaataactataactataatcatcttcaactaatctatac  
gcgcatgatgtcctgacgttctgatacaattgattctatccagatgggtggacttggattttcagaaacctagatcacaacaaatccatctttc  
aggagcagcttctgtttgtactttgtgcatccgcatattgggattatcctcttagcttttgcataattgaaagcagcagcctagcggttttgcgtt  
atcaaagttaggctcggatacatataatccatactcttcttcaaaactagatgaattttagaagtaacttggacttcttttagattccagg  
actggtatagagaagcaaccttctgcatatgaattcctatgtactgactcagctcaatatacatagaagaaaatgggtggaggcttccattga  
tccagaatagcagagatatttttccactattgatgtttcaatctgatgcgttagttcatgagttattatcaattgggcccaccactggattttat  
gaatttactgtgacgtcctaattggaaggtatcacgaatgattgttgggtggcagatccttcaaaagccatggcgtcttcttaggaaatcact  
atgtaagtgagaaggatcacaggaaagttaacgtcctactccgagatccgctctggttctgcggctgtaaatatgtcatcagtttggaaaaaga  
aaaatcttctattgaaatgagcgtacagagagacttatgttacagctctgagacatttataaacgattatgtttaccgttgcgaactcagca

aagtcgtcaaagaagctaataaggattgatgaaataaatacactgttctcctcaaatttagcaaagctgatacagataaattcaaccttttggat  
gaaattgaagcaatcatggctgaattagacgaagacactgattctgcagacgataaactgatgattttgatttaaggatggcaacgtgtctgtgg  
aaccatttccaggtgttcgacagcattatcctggtatcttgaacaaagtaatgacttgggaagtattaataaccgcttcaaaaaacccaaag  
ttctggacttattgacagaatcaaaataaaagaaaatcgcaatgtaagcctcagccagctaattatggagcctgtccaaaggatcccacgttatt  
tcttttttgaacaaattatcacgcttactcttgatggctctcccagcaaacttacgtacgagcaatggagactgttcataacattgctgagatg  
cctgtcgttgatgccgaagagcgatcaaaattttgcggccttcaatataatccaaatctgccccgaacttgatatcaaaactcccagattt  
actcgactgtattgatgtaatcgagaaatttgaagagtgagcagcttctgctcgttccgtataaccattttgctttcacagattgcatatgtctgct  
taaaagacattcaaaagcttcttgctgatgtaattgtggaactgaaacaaacattcgtattaccaaaagtcattttcgagagagaagagtgac  
aatacgtcgttggaaatttaatagataacattgagttgacgagaggcattgatgaagactgtacaatatggcttataccaaatctgcatccacatt  
cccatttttagggaattcctcttataaattgttttaacgaatggtaaacattcccttgaatttttactgttctttcagcaagctttagcatttcg  
aaaaagtcaggaaatgcgtgtgactagtcgctgttttaattgattttactatttttacagttgctttacaccggcatctacgaaaaagaaaaat  
cggacttcaattatgctgttgaatgatgaacaaaattcctgtaatgctgagcacttctctgtgagggtaattgtgttttgaatatccacaggca  
gaacgaaggttatagtggaagccttgacatggttgacttgccttcaaaattatcgtatctgaagagagattgaggaaaaatattcc  
gaatattaattcaattaagcgtatgcttcaagtccttttctaactgctgtttttcaacaatcgatctttatgaaaacatttctcaatctactgct  
ctcaaacgcagctccaagaaaggaaggctatcttggggaggacgtccatctagctccataaatgggcatcagctttaaaggaacatacggga  
acgaagggatattccaaatctgttcaacacttccgtcacaagcatggcaatactgacacaaactcaatcccagaaagcgttgagcaatta  
caccgtaaggttcctactaatggttcaatttaaaacaattcttgaactttgaaaagctttaaataatattttggggatgacaggttaagattagct  
gctatatgtgcacatatattgaacgaaaatgttgcaagactgactatataatagattatggcacaattttgaaaggaatttccctttcgaagg  
tcagcaacttgatattttgctagaggacatcctaaagaatcaccggaatttaagcgtatacaaaagcttccggaagcacaataatacttatttt  
tggaagtattgaagctttcgtgtcagaaagtatggttcttattaccctcaatgttcattcaacgtttgagtaataatggatacataggtgcgaa  
cagttttgcaattcgacttgaacataataggttttcatatgatttgaaggtatcgttgcaacagattcaaagttgtttacaagagctaccgcagc  
aaaatttgcgaattttggatgtagtccttaacatcgttccagagtaagcatacatatataatgatgaatcgaaaaactaattataaaaaggttac  
tacttagattaccttagagaccagtgtaaacgctcattgagcagatggcgagcgtcttctccgctttatctgtaacagtgccatcgaagt  
catacgtttatgacatattattatgatcaattattcaaaaaggatacctggatccagaaaattccccattgcaaaaggacgctgaactttatcgg  
cagaaagagtatgaagagcgagcatctcaacaggttgatgaatgttaagcccaagaaatgttcccgggaaagtgagctaaaggattatg  
agtatctcgacaaaattaccatagactcttcaaaaaatgacaaaatgacaaaacagattaatggaagcaaaaggcaatgccgatattata  
tgatcaattgacgcatgattgaagctaataaagcagcttcaagcaaatctggctcgaacgatgtgaattagatattgctaagtgagcgtt  
gaaggagtatgaagacgcaaacagaacatgtctaataacgattacaaaatggagttttttatagtttagtaaaactctacagtgatgtgaggt  
atthaagatcgcaaaaactacgtgcaagtaaaatcgatgaagaaatgattagttaaaagtcggatttcatgataatcattcaatacaaaa  
caaacgaaatgtccactttcaggagaattcaatcttgtatggttatagggtaatgtagataaagtacaaaacggatactcctgtataaaatta  
cttttgatagagaaatccattctgagtaattcagtgagaatgagaactaataaaatctagaatatccataagtcacaaaagtagaaaagaac  
ggaagaaaaagatgtgtgaggttattaataaccttcatgaaaagggaatttagctaaaggcataaacgagaaaggacatcaggcgtggcat  
gcacttatctaaactaatcataagcgaatacaaaaatagggcttaaaataggaagtaactcatgcatgctgagattgagattgagcatcgg  
gctgatactttgtaagaactcgttgatttcttgggtctaagaatattgcagaccattcgttctttcatcatcattgaaatggttgcaaatcaa  
tttttcatctgtaaggaggtattgtcaagggtcttgcctaagaactttacgccaatgcacaggccttccaaattaatcttcttatattctg  
acgcaataagctttggatgctgtgctgtttccaccgatactgttgcctgagttccgtaattaccagacggattagattggaatagctgataac  
catgaatatgatccatccagcatacaaaaaggagacacaaaaggacgaaccgcatattgagtgatccctgcttaagtcgcaaacacg  
acgcaccaactgttcaaggtatttcttctgtaaatgtttgtagatactgctgaccactctttagcatagtttaataagatattggcgtctgag  
taagaccagctacagcgaacatggtgtctcaatatgatacagctttctgcccattctctgttcgagcaactgtctgtaaccttctttcag  
ctgctaaaacgataaccatccttagcaacaattcctaagcaacaccagcatgattgatggcttcaaggcgtatttacttgatacagacgtcctt  
aggtagagaaaatggtagtagcagaatcgtaactctagacatgatgagtttgtaaacgtgaagtttctaagattcttcttcatccacattagg  
aattcgtatagatgacgtgtatctcagtaaacagtataacgattggaataacactttttataagaatactgagtggtgacaacacactagtaaac  
aaaaatgcaaaatggatttctatttatgaggatcatgaggaaagctcagacctatgctgagcttctggtactcaatgggtaactaatctaa  
gaagtaagacaccaggaagtcataggaaggaacaaaatcagtaacacggacgtctgtaactttgaagcgaaggtgttaagattttcat  
tgatattgaatgaaatcttattgattcaactgctttatgggtcagtttggttaacacatgatgtttcattttcacctctgctacatctgaat  
gaacacctaacaatagaatggaggatcattgccccctggatggcagacaacatagaggtatgtattcatatttttagatataatgtaacaga  
gagtagcaccaaatggaattccttattactggaatgctgagctaaaaaaagtaacttcaaacgctcctgctggcctgatgaacaaggaaaagc  
ctctggttctattcatttgaacaagaagataaaacactttaacggaaacaccgtagccgaaaataatgatgaaaaacgcaaggttgatcgtg

aacatcgaacaacatcatttgatagaccaaagtataagtaagtgaggacggacttaggatgctttatatgaaaacactttcactgacatcctaaga  
aaattaataaccaggttctgatataatgggtgattgttacgacgaaaagaatcgatttttctcataatacagagactcatgaatcgactggatgc  
ccccacaggaactcttgagtatcatttcaacttagggttaccaaacgaaaattgaagaaggaattcaagcgaatgccaactgaattgaccgct  
ggtgacgaaaataatgatggtaggggtgactaaatgagcatcctggaagccctcaattggcaatgagtccttctgaagatgaagacgaggaa  
gcggattctgtgaagaagaagttatcgaactgaacctgaagaagacgatcagagcgataatgacgaaaatgaaaatattgagttggcgaa  
gaagattactgttcaacttcaggaactagaaggaaaaaatcaagaaaatacatctttatcagaaaaagaagagcctgtagttgatcacgaaa  
ccgccgttcaaatcttcagggaaactttgaaggataaggatgtggacgtttatcggacctgggaatttactatccaaaactactagatgatgaac  
gttttctagtttgggtccggacaagaacgtcgtcaagttttgaagattattgtaagctgctattgcatcgaaccagttggcgccaaaagta  
tcatcctatcaagttttggggactcttcagagtttaccaaacacactcttatggcctgagttcaaaagaaaatataggaagtccaatattaa  
gtattcctgcttactcggagagagatttagaaaagctcttcgggaattccagatcctaaggaaatcgttcttagaagacagactatataattcca  
aaactttgcaggtctagaaatgttaacccgaaaaggcctgatacttataccgacaagattttgaacgatgtacgatacgggtgattttctga  
agaattacattcttggttagtttcaatgttcttcttaattatcctttctttgtcttggaaatcatctagttcttatagttaccattgttctatacc  
gacgctcgcgtcgtatatttggcttccaccaatcctcttagtttccaaatcgattgaggtcctttaaactgatttaatttactttggctctta  
attcatcagacattggctaatcatgactcgaatccgtcctgagattcccagatgttgcattttcgaaaagccttacagaattcgattcttggctag  
cgtgtatacaactttatctagaaaaccgacttgttatcaagctactgcattttcttaatgtctgcatcggaggtataagaccgaactcctaatgg  
acgatcgtattgactcgaatcgtttaaacaatgtgatcttgagcatgcacagatcagttccctcgaatgtaaaagagaatcacaatcatc  
atgtttgaaacagcttgaatcgtatcctcatgggtgatatcttcgccagccattaccatgatataatctcattatgtaaattagcacgattggaatt  
tgataaaggattggttttttaattataaaactaaacgttaggaatatctattgaagtaataagaaatataacgttgatccagaaagatctatta  
gagctgctgaaatctgaattccaatacttccaaacaattttagcgattttaaagatgaaactatactgaaaatcagaaaatgatttcttggttca  
agacagaacagagcaaatggatttggctggaatgaaaatgaaaatctagtaaatggaaaagcggaccagaaccaaatactttaaagca  
aaaggagctggtgacagcttctgaattaacccaaggctggttccatgaaaatgatagtcgatgaactttaaacaagcctatgaagaccg  
tgaggcttgaatgaacagttcaaggaagagcactagcacaatgataacgtctaaaactataaaagaagaactcagaattcactactg  
actatcatgaaatgttgccttagtttggggatactgaaaatacacttcaatcagccttgggaaaagaggttactcaattttgaaatcaatttct  
actttaaacaacaaaatgatataatctagataaagaattgggctcttcatgattctttatgaaacattctgtaaggaagatgagacttattat  
gataatatttgcataatttcttagttggccagcaagaacagatctcgaatggaaaacagaaatgtttgacctcaataacagccaatttga  
tttttagcaagttgattcttttataaagtataaaaaagttacagacttctcgtagcaggtctcgaagtcagcaagcggatatttcatgta  
ggcatatttggctataaatgttgaacttatactttagcctttaaactcgcacttctcctcaaaaatgtttgatgattataattgcatctgt  
aatctgtataagtacatgacctataaaactttattcagactattaaaattggcggttctctcaccttaaatacaaaaactatggacttattgtctt  
gttatttataatgcttattactctatttacctgctaatttctcgtcttataaaacttttagaaaacaggaactgcctcaaaactattactggct  
ccaccggagactgtaatttccagagtctagaaggacaaatcattacaattgtgacaatccgggatttcagaacaggaatgataccaatttctt  
ggtatactgaaatcctggtttttaaagatcaaaactcaacctacgagcataaacataatcttggcgacgatattttcaacaaaagcctggt  
gggaataactacaggatttctcaataaaaaatattgtgatggtacagttatatccatttccatcatattcaacaaaacaattaaattaagag  
attaactatgtacgatcacttatttgaagatctcaaaacttggctaaagaaatctattcccctatacatcatctacgatcaaccaggtt  
tttagaccatacaggcctaatttaccagtgatattgctatatacagctgtgatctctaaattaatgaaaatgaagtagacattgcaatttcaa  
tgctgatttcaaatggctcccgcagacataactatggcgattatgcagacatgttcaaaaacatgtttacaagagctgcagcttgcattgctc  
tccatagattttgctttctacctataacgtttataaagaagatctatcctagtgaaagagcttcggaacttgatgctatagctatcaccgg  
ttcaaagtttgcgctggtgacgatattcctggattaaaagcctaccgaattatgaaaacatcattgacaattacaaaatattaaagtcta  
ggaattgcttggccatcagattataggaagagctttggttcatccgttgcgtcaatccaaacggatgggaaattgaccttacgaactcagc  
taacggaaattggaaaagggtttcttaaagactcttaattatcaatcagatgcataaagatattgtctcggaaagtccaatggctttaggt  
gttaggtactataaacatgtgcaggtcaatccttttaaaaggacggcaggttcttcttccaggacatccagaattcagcaagatgtcgt  
acgtacaatgacaatactcgtttaaaggacggcttaccgaagaagagttcagtgatgcagaaaaccgctttaaactgaatacagatacct  
cgctccttgagctgacagttataaaattctaatgggaaattgattgtgtagtgcttttagtcggacagcaatcactgaagcttcatgcaagcgtt  
gtgtatactagaatacagatgctatttagaagtggtcgaatgttaagctttagtctttattgttgcattgactagttgttccctatttgaagta  
atgttatgaaatgaactcaagctataaaaccagagctgtatccgtaaaactattaagatagaataaatattctgttatattcctctgaaaggtaa  
acaaactctatttttctcgtgtttatgaaataaacagtcacagtttagttctatagggccaaatttcttaacctttaaaccagctactcctcat  
ggaaatgtataggtgaagataaacaggcaaggtttatataagaattcatacaaatgatgatattttgtctaatacatgcaccacgcttaggctttt  
gtctgtgtaacaacagacccttaagctgattgtcatgaattccaaaaaccctataacctttttacatgcttactaacttttacagaaaa  
caaatgtaattcatacatatgtcctttattttaaatttagctagttgttagtaataggggttattaggttggtatttccatactatactagtaggc



cgtataagccaaataaattaatttatgtatttctaaagcagaaaaataaagtaataatgaataggattaagctagtaatttcaggaatgacgtgc  
atgctgaatagagcaaagtcgccggataaaaaagttagaatgctttacagagtaatgaaaataaaaagattgaaacggttctccattagaatg  
ctttattgaagcaaaccgcaaacttagcactaagctccgctgcagactttggagttttgctctgcatatacactggatgttagtagcaacatta  
ttcagaggtagagagaataggatcacttacgtagcggatcctcagtagcggatgctcgaacaaaagatctgctgtcttcatagctagcaac  
gagattatcaatcttttctgtaaaccgacaggcctaactaacggcgctctgcatcctgttattgaggttaattgtagaatccatgaaatacttac  
ggtagtaacaaagacggagcgatccgcaacctttactttacaagtttattcggtaggctgcatacactcaaccaacctgtagcgtcccaaag  
tagacttccataaacgctgagcacagccaacatgtcactaagtgcctccaattgcttggtgattaattgagatagttgcaagagtgatcaatt  
gcagctgttcagatattgattgctcgggtggaaggattatgtagcttgtaaacacctgactaaagagtacagttccatgtccattcgttcaaa  
gtagacgccaatgtcgaattttggctgcatgatggagggtttgacaccagtagtgaacataattgggattcctaatttttaagataagcg  
gtggaagaaccatttgcatacggtttggattactccgatgtaagggtagtctggattttgtacgagaatttcaggaaagaaaccaggaga  
atacttattctgaccgtcaagcaagtgaacttctgttttctcaaaagtaaaagatgatgcggctcagcgtgccatcaatagaagcgtaca  
attgattaggaaccattttatccaacaaattcaccggcggtgattgggtttttcacatagtcagctccacagctctttgtagatattttgacgcta  
aatgatcattatgtagcaagatcgatacaatcccttaatcgctggacagctccttgagcggtaaagaaccaacaccattcgcaaatcca  
cagtaagtgtcggacggtagaacgggtgaagctggaaaaatatttataagcgttgacagatgaaatataaaaacaagaggaggag  
ggttggaaaggaatcgaatatgttgaattctggtaatacaactaacaatccaatgaagctgaggagtagtaacaaaccatagctttataagaa  
gcagaaagttcatcgagaatgacttttgagagttccgacagacgaggagaaggtctggatccatgccaatcactacactgttgaacagt  
agaaggaacaaggtattctttaatacaaatctactcacttttagaggaaacattggctaagttgtacatttcttccaagccatggatagc  
attcctcatcagcgtctataatttaacaccattatcgctgacgggattgtgagaggccgtaataatgactgaatgtagttaataaaaaaccttt  
cccaaatcattatgtacctcccactgttttcttctaattccatgcttgaagtgccgctgacgctgttgaaccaataattgcagcataaagcaag  
gaagcactagatattgtcagattcatttttaaaatgaacatactcagcgcgaaatcctgctgttccatataatacttattttcttgtttccagt  
agtcgctgcatgtaaacagggttggctcgaaggatgtaataaataagagcttaaacaggaccttctttggaccagtataaactctgttattg  
actctttcgtataaaaaacaagagttattgtaagagcactatggatcaaacctagcaatatctacattttcagcatctaacatatcttagcttg  
acttggctctgtactacttttagaccaaatcttcaaagtataaataaaaaagaaattgatgtaaatcagttcagcctaaactacctaactgc  
aattatgaatagtaaattagcaagaagaattgaaatcatatacttaaatcttactgttcgaatatcttaattaaggatctttacaatgattctac  
caattactggtttgtatagcaaaaaactcactttttctgcttatttactttctgtttattaacaataaaataagtaaaccaatccagtgatcgtt  
aaatactataaccgattaacgctttattacgctataagctgtacattgagtttagatattccatgttccattaacaagacgcgaaccatacgcgtc  
aataaatatttttaataaataagctaaacgatggaactctgtgtcaatttcgaccgcaattatgacaatgagagacaaaatgccccttcaat  
gatcaagaaagtaacacaattcgtatattaatcgccctcagacaatcatgtagggatgacagaaaaggatccagtcctggggaatgattcattcgt  
atcattcgatgaaattcttacaattgctcgtgaaaaggaggtaagtttctaaaatttttctggtaactttgtatctaatgtgtgaggttgacatg  
gtactttggaggagacattttcacgacaacagacctcaagaaagcttttaccaggccttacgcttttgagattgaattgtttaggagata  
agccttgtgaacttgaattgttagcgcacttctgtaacaactggtgatacagcgatagcagtgtaaatatcaagatccaaatataaatgttgc  
catacctgtattttcaattcacggaatcacgatgatcctccggagatggcagatagtagcgttagacattttacaagttacaggactcgtcaat  
tacttcggacgtgttcccgaatgacaatcacgattagcccgatcctttacaaaaggatctcaaaaactgccttataggactttctaatg  
ttcgggaccaacgcttatcattcgttccgcaaaaataagtaaaattcttacgaccagatctgtatcaagaggaatggttcaactgctagtagt  
ccacaaaaccagtaagttatacttttgttgttttgggttggtaaccggaatgaagtctgcacatacagaaacaagttattacctgaaa  
gttttattcaagacttttacgatttctgtttatggggacatgaacacgaatgtatcattgatggaacatacaaccaatgcagaaattcacagcgt  
ccaacctggatcttcgtagccatctctcagctcctggtaaacgttccaaaacattgcggtattttgcatattaccgggagagattctttatgg  
agaagattcgtcttctgtagcgttctcttctgttatgaaagatattgtattatctgaagtcctcctccatggctgacaataagcgaga  
agtactcacgatctcatcagtcagtagaggagcaatcgaagaagcaaacacagtggttgaagctcagggagatgacctgcccgttttg  
aatgagaagcatccgttacctttaattcgattgaggttgattacaccgggtgctatcaaaccgaaaatcctcagagattttccaatcggtttgtc  
gacgagttgccaatgccactgatgtggttctatttcaactaaaacgaaaatatacagatattttatacaaacggatgtttgtaactaacataatt  
gtaggaaccaagaagaataacgaagttgtgataatgttggtgaagacggaaaaataatgactgagagttgagtcattggtgaatgaatatt  
tgaanaagaatcagctagatgtctaccggaaatgtccttggtaacgggtgattaattttgtgaaaaagacgacaagatgctattaaaga  
gtaagactatgggaattttcgttcagaattataactatcactatctatcagatgcgtggaagatcatttgagtaacaaatcaatttgcgttgaa  
aaagcgtgttacggaagagaatttagaagaggaaattaagactttggtgaaaaatattcccagctctcaacctcgaacgaaaagaatacga  
atcaatggctacaccttctactagtttctcagatttctcccagacatggatgaagataagcaagtggtcctcccggtacgattagaagaaaa  
cgaagaaaaagacgattttcaagaattgaatcatgccgacctcaagtaaccacctaatacaacaaaacacgtaattctcccggcagtagt  
tttcaaaagtcagcaagcaccaaaaggacgctgcaaaaaccaatacgccaaaaagacatcaggacgcacacagggaaagcgcgtaaaca

agcctgctgaaaaaagtacacaattgatgatgacacaatcgtttaactcttcacaaaaaccaggcagtcataacttggatgacgatgatgaaatt  
ctggatgattgaattacttaattgttttattactcatttaagacaactttacaacctacgagatgaaaaagtgaatgaacgaagcatatggactat  
gtttcataaagtaactgttatgactttcattaatctatatcttttgcatattctctcctcatttaccacgacgattgagtcagtcgtcaaagttca  
aatattggcgaactgaccgctgactgctttactcgataggatcaaaaggacgatgaattttgatttctaccagattaactggatcaattaa  
agaggatcatcaatagaaaaatgatataaggaagttaggtttgttagagacgaaaaggaaccaaatcatcaaggatgagactaaggatataga  
aaccttgctccgcaacagcagtgattatgaaatcaaatcataaatccaattgttctactgagttgagttggtttctacgaatataattgtgattc  
acatgaaatagataactaaccttttggcttttaggattttgtatttttaagataaaagatgattgctgatgcaaaattaaattcaattttttcagt  
tttttaaaatgtttccaaaaagtaaaatctcaaaaatattacaatttttaatatgcttaaataatgctcaaaactgtcgaagtcatttctggc  
aacaaggctgtgcttcttaaaaagtttgaacaaagaccactaaaatcaaatatctggctgtgtaaaatcaaaaccgaaacacaatgtcaag  
catgtcgtatgatgaacattggatgaagaaccacattagaaactttagcagaaattagcaaatgggaaaccgctaaagatactcccagggtg  
aaatacataaacataaaacaacaaatttgaaggcacattcatcatcattgatgatgaaccataacgacgttatccaagtggcagtcaccaat  
tcggtaggttacagacttttagtttttctgttattctacctgtctactgttttctttgctcttaccaatagtgaggacagctactgttatttggcat  
cgttaagcgaattttggcaacatctgataaaagtcgtgcgataaaacctctatccagacaatgaaaccttctcgtcatgccccaggggatcaga  
atcagtcgctcgtcaagatacgttcaattcgtgatcgtcgccagctattgctactggtaagattagggtgatttagtgattgataagtaacgc  
ataaagaagcttaacaggaaggtttagctcgtgataatcaaaaggaggctaaataaccgagcagcagcattgccaatatacct  
tgtgtctttccaaggagtatttcttttcatatgagctttcattgacctttcaaagttttctttcacgtgctgtgctgattataaccgtcccttgcct  
cgttcaaatccttgaatgcttttcaactagcgcgcccgttgcctttcattgtcctatgacaagtataattttagacgaagcagagagtc  
atcccactcgtttatcgttggcggcgttactactgttctaatgttcttttggaaattttgacgcaaatatcacttttaggaacttttttct  
ttgtctacaaaattgctttcattgcacacttaattttgtattctccttcaattgaggatcaccaccaccattcacatcttgccttt  
tgttccctcatgatcttttaagaagcaagcagcattctgttcttagattttgtcagtgctacctgggtgtaacttaagattatcgattagctgatt  
ggacgaatctacgaggtattccttggccatcctaactcattctctatctaaagcttaccattgcaaacagcaacattgaaaactctct  
tttaccagtttctcaaaaaagctaacttaagaacaattttcttattctggaaacatctgtttcccgttgaagctaggatattgacgtgcaat  
ccttggcagctcgtctagttgtgcaacgaacaggattccaagatcagtgaaagcgaaggccttgccttcttctgctgattataaaagctac  
ggcacttttggccagtagctgattggaacggcgttgaagacattgtcatatagcggcaattttttctataaattcacgcttgaacacaag  
tagaggaacactccatatttagattctttctgttattttctataaaaacctgttgattgattttttttcagccgttcttttattatct  
tcgaccttgagtagatttggttggtttcttttcaataataaaaggtccttaactggtttcattgttctattgcaagaactacttttgcct  
ttccgattcatttctgcttctctgttttacctgctgagtagataaaacaaactctcgtgctgcgctttttgtcttatggttgttgtgattttct  
cactgaaaggaatcatcgcttacaacaattcaaagtttttaattctccgattaaacagttcttctctagaaattcgttcttttcttaactttt  
tttttctacattcatctattttgtctcttaggttgcattttgttctctgacagctctatttattcgtcaaaactgatcgtgtacatcgggattctg  
acttactttcccgttccagttttgtttataaaatttttaactattttagcgtttgcgtaataatttttttttggctaaagaaaatgaccggaag  
tcttctttggcgaatgtgttcaaatgccaagtagaccacaacctctatggaggcgtggtcccaataattccttgccttgaatgcttgggtcctt  
acaaaagcaccgaaatcaggcccgtcctataaagtcggaagaacatcaaaaggatttattctctattgctaacaaattgcacaaaggaac  
ttgttccggagacggctattgtgatggaacaggtggaagtgcattgcaccggctgtccttcttaataatcgttcaaaaagcataaattcaaa  
aaccataagcatgatcgttctagcatgtcacctaaactgactcctctataaatagtaaggagtcgaagcctctaatagtgaggatgaacaga  
aacttaaatcctgacgctggaacgttcaaaattcgaaggcaacaaacgccgcaagcgaacaatcgaaggccaacctggttccgc  
tagcaggttaggcgctacatgtgtcaaaattgcccgtactaccaatactccccttggcggagagatgaactgggaaatccgatttgcattgatg  
tggccttattacaagattcatggcatacaccgtcctgtaaccatgaagaaagctattattaagcggaggaaacgtattgtcatgcacaataatca  
tgggtgacttcacagcttctaaacaagctgccccacagacatccgatgaacataagcactcaaaagctcggcccaaaagaaaatttattgt  
ccaagcctaccagtggtgataaaatccaaaatatccataaagatctgatagaccattgactacggttcccctgcaaatgggtacttaactcctgc  
tggctcctataaccatcctgcttaccactaacgggtacagtggaataactctcccgtgtaataccttctcctttattgacgttatcaagactgc  
tgcaggtgagcctgataatagccattattatccttataataaagtacaggaaactgctcaatccttgggagttccttctgatactcaagctgat  
ggtgacgtcagccagccgataatattgtcagtagaacctggtgaagttgctcaaaatgcacgaacagttattctgcccacttctcccctta  
atgttgatccttcaaaatgacctcaggcttaccttactgctggcgaattgaacggaagagaatcaacgaagcaggaaagcagtttttgaata  
aaaaatggcatcttccccattctcccgtaggtagtcggttaatttaccagtcgtgaacaagcaaaacaaaaattacggaaggcattgctt  
cactgttgaatcctgaagagccggccttttcaattctaggacactgaagttatcaatgataaggatgaaggaatttcttcacaaaccgatg  
aagctcgggttcttctatcgaatgcacctccctaccgttacaatttccccggaattacaaggttcccctgctgatcaacggcaatacgcactg  
aatgtactttctgagcttcttcaaacatgatagcatggtgcaagaactgtctaataaattataatgataaaaattgacacgtggttacgct  
catttaattgtaattgaattgggtacgaatcgtacaccggctgcaaatcctcgttaactctggtgattgacagactaaaagtataatcggtaggag

ggaatactcacttcggaatcctaataatgtatattaaaacaacggacttggttttgatggcctttttgtccttgaaataggttcaggttaaggtta  
cagaatgtgtacttttgctatggtttataatattaagtaataatattaagtggttaacgggtttgtcacggtagaatctcacacgttat  
gagaatctttattgagtggaagtaataagtacaactgtacgattatattgttcaattggacgacttggtactacgtagaagaatagtaatagcgtc  
caaggatctgttaactaaagaaaaaagaaaaaactcaattatatttagcttgaccaggtgaatcttccatctgagcatgtcggtgtggacca  
cggactgtatagcttttctgatacaatcaacatagctgtttcatattccccttcaaactcacagttttgtttgtatctccaatcgttgtttacatg  
atacaacgggatgattctttaagattatgtccataaactaatgcttggtcatgtaccataatcttaacgactcgtaaaatcaatggtgtgctgaag  
tgtccgactgtgaccgtgttcatattcatcgtagtgtctattgatgtattagaatagagaacgtaaaggcattttgtagcatcctctgtttccgtt  
tgtttctttttgtttcaccatatacaaaatcgtttattatgccattctcttatcactgttactcactctcgttaggttcgctcccctcacctgttat  
catcactatgcgccatagagagatatatatatagagcactggtagcctttacatgggcttttaaaaaatggaaagggcaagcgcgtaaaaaac  
taaggattcacatggttttttctcctttctttatgattaataattaattgtttttatccattatttcaattattacattcttttctacttagcacttcatt  
tctcggttttgtttgtctttttgtgatttatcccactggaaacagatttctctgtttatctcgattaatcgttcatcatgtgtcttattgttttaa  
gtgctctgctgcttcagggacggctctgtctctatgccatataattccacaggtgctagtattgaaatggaaaagatgatgcaacaaaaaga  
aaccgctcaaaacagaaggggaagggcggtgcttttattcctcctaaatgggtcgtttttgtggtctcctaaatccttcatatgatgaatctgat  
ccagcttatgtagaattgttttgaagggaaacgaaacggaaacgggtcacttccgtctatttttcgaagacttattcaactataagcatgc  
tatagatggtgttatgattataaatttttaaaagatctcgttcaaaggctaataagattttgttattcctcctttctcagatagagacctcaa  
ttcactgctgaggggatgacggcaaacgaagcgggcacatattgctttttggataccaagagattgaaccaactggaaatggagaagcacct  
caactataatgaatgccgttcaaaaactgttgattacaacagtgtaaaccagtacatcgtaaattcctctatttctcattgttttctagtttcgta  
gggtgtgattggctcgttcgctggctcgtgacactagaaattttactttactcaattcctttgttggttggtattccgatttctagtttaaccatcc  
tatgaaacaaatgttttccatattgtgatcttataggtcaataccttggcgaatattttcgatgttcttactgtttgtgacggaaatcgaacg  
ttctctgttattcattaattttggctcttactcgggttgggttatcttcgactagttcaaaaaagttgggtttctgtgctgattactaggttgggt  
tcaatcgtcttattgtgtagtagctttgattttcccttttctatttttaaccaagctcctaaagcaaacctttgcaattggtatggtgcttttag  
ttatggctatctcccacacttcaataatcgggaaattttggcttaccaaaagtaacctaaaaacaggacgtgcttttgattcctaatacatgaaa  
atcaagatcttcttcttctttactatcaatccttgtgaacgtcaaaattttacttacgagtgaccctttttatacaacagaagaatcgca  
aaactcttttgggttatgtacttttcttctcgcctttagttgaacagatattggcagagcgttgaaagatgacaaagcagaatcagaaaa  
tttgagaagcctttgccattgacaaagacgatcctgaaatgggctcgcctgctgatgaaaagctttaaaggtttccagttgctaagatgtgtgc  
aattcgtttgtttcacaatacttagtattacgtctatgtctcctaaacatacaaaaataaagttttttgactgtcaggacagaaactcgc  
aatgcgaggttacgtatttcgagttaaagaaaaacaacaataactatcttgtatgctaagttgaatgctgttataattgttcatagacgttagtact  
gtccagggatctaagtaactaaatgaaatgcttggaaagatgataaattatagcccaagcattaaaccatataaattgttccgaaaaactcgaa  
ttgtaacaagagtccgtgttctagtggtatgatttctgcttccacgcagagaaggtcccgggttcgatccccggcgggactatttttctacatgcta  
taataagagtatacaagttcacttattcattatctattcgacatcaatcgcgtttacaaaatagctgtttgtttactactattagctaaatacaac  
ttagttcacattcgactagtagcctctgtcaaatcggtcaagcaattctaattcattatctaaagtacatacattaaactaaatataattcaa  
tacatataatgcgacatataataatccttctattttttagaaacccaaaaataggcagaatgcgattgaagggtatcaatgaaactcatgtaaga  
aagtaaacattaatcatgagcattaccaccagaatctgaagaaccaccgtcatcacggtatttctcatcgtaccctcggcactttgagagccatc  
acctcatcaacgatattttctgttcggcttcttctttgagccaatattgaaagccgagtttcatcttctggaataggctcatcacgagctttcgca  
gaatgatcgtttcgaattgtcagcacgcaactcatactcctggctaactgttgataacggatatttttctgcataagcttctgcagagctgc  
aatctcctcaaccaaggctttttaccctaaatcatccagttgccccacgatttccctaaatttcgacaggtttctttatggtagctctagcttact  
atcccctgtaagctttttcttctcatcgtcagcaagtctctgcacacatgccattgcatctttgatataacagaatggattcgacttggttaatt  
ggagggtcgggtaataaactcaataaactcggaatcagaagctcgttcttcttcttatgctcatccaatcgttctgtctttaaaggcggtatctgc  
gcggtaggaaagatgctcgtgaacttccgtatctgtatcatactgctttgtagttgtcgtagcatatattctcaagctcattacgagcagtttctcc  
cattacaggtagtctaatccaagctgtgcaaatcattaatttctgtacatacagaatgccagccagatacatttcgacagcgaagaac  
cggatgtagcaggctgcgataatctccaacaaaatgaaggcatcccaactaaaggaaccactttctgtaataactggagtcaaaaaattg  
ctttttgaacaacaatccatcatagaattatcattagaccagtttacttcccagcaatcgagaagttccgcagaatcgttagttgatcagcaa  
agtggttcatcaaccaaggtttaaagttgtattagttgaaaccttactatggccaacggcagtttccagtaacatcagctacaaggatagg  
ttgttctgttacgggaaacatattccatattccttgagacggggatggagctttagtagcaggaaagctcaactatcttcaatgttatcgtatgaa  
ggtaaacctcaaatgaccttatactttttccaaaaaacttttagtatactcaaaatataataatattagtaagcaattcattataagacttt  
gaattcgacatacctttctccaggagcatattgagtactttttagattcaagatttgagatggaagagtcggctgaattttgatattcgaagta  
agatgatacggagaacaggtcataaccacatgatcagcctcataaacacttgagtcggtaacgtgtacatagcatttagagatatcattctaatc  
tcacagacacttttaccgtactgtatatttaaggtacggataggactgcaagggccagcttagctgagaaagtcatttttaccacccctaggtg

tcaagtttctaaatcaaagttcaatcaggagaacttttgaagcatgcaatatgtcatctgcatcattgagatcataccatgtcaaaaacct  
tttttcttctgatgacaactttaaataagaatttttttctggatcaaaaaaacgaggatttgcttgaaggtaagtggtgctattttcagtaacaa  
atggaccatgttcatggttcgggcaaatctcgtaaggaaggattgaaagttttgaaaaatgggtattgacgggcgatcgttagattcgtttgt  
cagtaacgaagcaagttgcaaaagtctgtccacaaagtcccaagccgcttgaatcactaatacaaacattttattgtcttgatcatttcgtaaa  
agatcaaccccttcagaggaagcgtttgtaaaccaagttgctgttctataagggtaaagagcacgttatctgctccagaagttaaaaactgaaa  
gccaaagtctattgcttctgaaacattaggtaaatcttgataacatcttgctgtgtaaaggacgattcatagaaggaatgacgcggtataaat  
tcggccaccagttctttgcttcttcagcaaaaattttttgggatagcttccccttggagaataagaagaaaattgagtaaaagagcgat  
gttaaagcctagcgaagcaagaccgtaagtcgacacctaacaataatagtttttctgggggtgagggagacgtgtttgaaatgt  
tcggagtaacaatggactcaaaagacaaacaccgtaattaatgtatccatatcttacaagaaattcataagctaataagccaagggaaataa  
acatctatcagcaaacaccttgggctcaaccttagaaaataggaaggggtgggatttctgcccataaccaacatattgaattcgaatctgtaa  
gtaatggaacaagactagggatctgtagtctgtcagatagcattgttttcaaatggttccaaggcagctggatctaagttacataattttgca  
gcttcatgagccaatctatagaaagattttagagagctgacagggacgctagcaccagctattggggctgtgtgagacgacatttgactagacca  
ctctagcagagacctggggttctactgtagacgtttgatcatgaggagtcgtaaattcggcaggttcaaaaaaggtagcgggaagccattggcg  
aagtagtaggagctgatgggatgactggaaaagaggaagcagctggcgaatattgctattaacagatacggatggcatcgtggcagaatcca  
tgtcaacgtgtttagacaaatcggcggtagaaaggatctgtgaaggaagaaatgaatcagcagttcgaaggagtaaggcggcaggtagatg  
gaaactgttctataagttgataaaagctgctgagtagatactgtgaagggtctaaggagtagcgaagattaggaacgaagtagaggtacta  
gcaaacgattggtttgggtgcaaaggaattgaagcgtatcttctggaactgcagagcgttgggagaatgattggagaattgggtagaagcag  
caggggtgttccagcaactgagttaagtgattttgttggagaaggaaggtgatgatattgaggaggtagccccatagaagaaaggtttg  
aatgttgggaaggcgtagatggagtgaccatcatcggttgagcaaaagaatgggatggatgctgggacatcaagtaaggtgaaatgggg  
tatcataccttcttgaacaaagttgggtatagccagaccatgaagtattcaacatgttcgcggaaggaacattcaagctccatccggtcgg  
aaacattcgtgcaaccatttggattgcattattgttctatctgttcaaacccccctcaatataagcaagtaagcttctcactgcttgc  
ggtgtgactgggaagaattggcattgtttgacgagccaaaactggaggctgcaccatgttccccttctgcatctgatgatagcatagcggttatt  
ctgattgttctcattgccgttcatgagttgatcacttaataaaaaaggggaaaaacgaaggagatggcgaaggtcgtgcttggagaagtcagctt  
ttggtgtttacattggttagtgatgaaaagacttttcttccaatataacgagttgtaacagttggattttattcaacctgaactgtagatt  
tagtatgatgttatataatattttataaacaactgatagttgtttatttacaagggttctccatcaaatgaaaggtattcaatccctaaaa  
gaacactcttaaaaaggggtcagaagctttttaccatttagcatgttgagaatagcagatctaaactgagacttgatagctggattgtttaaagga  
aatagaattcataaccattatacaatctatataattcccctagtgccctcattaatagtagcttttactattaaacgctatttttattaaaaaa  
tgaaattttgttaattatgctgagtaagaaactgtacactgctgagaaaaatgagcaagttcttttaccagcttattaccattacgctag  
ctgaaatcaaaaagtagatcgttaagtaaagtttctgtcttgcactctcaaaaaagaaatggttacggtactagctggcagtcgaaaaagact  
gtacgaacatgttgagaaactaattgcataaacataagtagaaacgacatttcatgttattataaagttattatgctgagcatcaaaat  
taaggattaaagattatgaataattaagaattccttctgtagacaatagtaagagttataagttgtatatgtaatagacagtagtgaatgtg  
gccttcaaatcattgaacaattgaaagaagtagattcctcgtccacgcaaaaaataaaagatgcaggaaatattaagatcaggattat  
tcttatagagataaacttagctgcccagcataactacagtattgcaaaacctggtttataagaacatcaaatcttggcgtaatccatggtt  
agctccgtgtatcctcagcgggaagagaagtaattcctcccttttggataaagtaggagaaggactaacagtaacatcagaagcaagacaga  
cttctggggacaaagaatgaacagacgttctttagagagccgcagaagatggagaagaagtaggtcctgtacaaaatgctcatccatctcga  
aatagtagagttctttagaggaggaatacagcctcggaattatcgggcatgggatcttgatccggtagaagagaatgtccgaagcatcaccga  
ccagctcgtcttcttaattggatgcttagcttttcgaggagcaagagtagtaaatgattgggctgacctgcaatagggacgggatcagacg  
gagaaacagctgagtagcatttgagattgaggcaaggaggagatacaggcggaggtctttagaagaagaagacatggagttgaaaaaaag  
gttgaggagcgttaggataagcaagatgtctaacaggatagctggtgttgggacaagtgaagaacgttgagcagttttgttcaacatagggag  
ggtattagaatataaataaaagaagaagcgggtgtgtcgcagaaggaggagactcgtaggataaggaacagaggcggcagatgaggag  
gaggagtagcaggaggaacgcagaaggacgagatgaggagtagtagagttggcagcaaggtctagagtaggagaaatagaaggattcg  
aaacgaggaagaaggattttgggatggttagtaatagggaggatagtagcaggaggactactggagagggcacagaagtagcatatcgc  
tcgttgaaaaaagatgtcatgggagctgtagggcgatagaaaggaaggcggctgggagcagctggacgaaggaggagcggtagttgagag  
tgaagaggagtagaggtagaagaagaagaagtagaggaagtagaatactgggaggcatggtttgctgcagatgagcaaaaggagc  
tgagggtataagaaggtgcagaaaggtggaagagccattacctaggggtgggaagagaagaaggagaagaaggagatgcaggagtc  
gagtaggcccgaaggagaagatgagttatccaagttaggtgcagtgaggggggcagaattggcaggggcataacgacttcagccttaaac  
tttgagaggaactaagaaaagcatatcgttttggatagtagcttttagcatgtagcggatccacatcagctcattgattttgagcatggaag  
ggagcccgcgacttgaaggaaagagaattgaaagtcgacggcatgagacttggtgtaaggaccagcagggatggagacgggaacggaat

gggagaagatctccgtagtttctgctttatcagacgggagaactagcaactgtagggtgttggtagacgaaggagaggagagaaaaaccgtgatg  
atagacagcataaccctaacacgggaggtatgttgaaggaacgaggggaggtgccgtattcgtttcaaaacaaatTTaccgggtgatgggct  
cttgaaaagtaaaagagggtgatttagaactatTTcAAAAacattaaaggagggaaatacaaaataaagaaaagaatgagagccttata  
gatatagaaacgcttgcaaaaaacagccaagaaaaaagacgacaagaaagtaatacctaactcttGcaacgagtaggtacaaaag  
acaaaatccaaatattgtagataaagatccccaaaagaagaattgatgagcagagacctgagaaaagtagtatgCGaaaaggatacgtgctt  
ctaacaaaagagaacaaaaggaacaaaagttgacgattgtcaagtcaagcacacaagacaaaagaaggaaaaatccaacagaaagca  
ggaaaagacaaaattgataaaacaatattatccttTgtcctagtaaatatgtaaGcgagaaaacgtccaatggaaatggaaaagatgaa  
acaatgagTcaatcttGttaaacaatTTctatTTactTTgactTTTaaaaacagtataaaacaaaaatagaaaatcaaatgaaagc  
aacaatgacaaagtgaaTTaattTccaatacTTTTgtcaactaacgaaacaaggggatattaaaaaaataaataagaacaaatgcaaa  
agcaaaaattaatccaacagggcgcaaacaggaggtaagatacctctTTTTattattgctcgatggacaagaatggactTTcctatag  
ggacaggaaccggagcatttattggaaatggggaacaagaatcaaatgaatgatctagctattgaggggaacatcggatgtagatccg  
gccctttagtaaatgagggatcgttTgaagatagtGctTTTTgatgaaatcgagatcccttagTtcaccagccaatTTTgatacctTgtcggtg  
ggtattTcctgctTTatctTtacgCGaaagaacattaaGttcatattaagaaaagagcgtaaatgatgacgcagttattaacaagatgagga  
acagagaggagagTtggaggagacggaggggtaaaagaaggggaaggaggctTtgattTgataaaaggaggcaataagcattgtagaa  
accactcctTgattcGgtcTTTTgtcaagattattctTattTgtgattattattacacattagaacaaatataatgacataattatacaaaagc  
aaagaacagtacattatagTgtgaattgcatatgtatgtagaagtaggtTcagagTtgatcactTattctatagaagaaGtttat  
tagtagaaaaatgaaacTTTTcgtcTactcctTTgtctTTTTctTTtctTTcctTTtattTcccctTgCattgattcctTtccgtacaggggaaa  
gggatattTtTcgggtGcacaccaccgctTgatTTTTgtcgtTcGactTTgtcatataaagcagcacatTTTTctagTgattcgtTctGaatcG  
tcaaaatcttattctgtacGttcTtaaccatcatGaatctTgtctTgtTTTTgactacatacactagacgtcTaatgacggaaagtagattGctTg  
ctactgtgtagaggataacaaacTtatccaaaggTTTTgtactgagTctatcctTcTcaagTTTTTTTTTTTTTTTctTgagattaatagc  
acaacaagatgctTTTTaaaaGcaaacagacaaactTgttCaCTTccatattgataaaacTgatatccctacctatcTaaCCgTggatgtatt  
acttatccatcatattagTgttTattattatagcTattattataatcatcctTaaattatagcaatggTtattagaattgCGattatgCagaaca  
gcatctTcattTgggaggaggTcccgtTTTTcaattggccTTTTcattatcccggattgtcatcaaacacatccacctgCctTtCgacTct  
caatggctagcTtagacaaacctagggTcgGttggaatcTatcGatggaggagTcgattgTaatGctggatcaataactGcaaaggTtgC  
tgattagtaggtccgatccatagaacctgggcaatattGcaagcgcgatcaaatgCaggcataatggTattTTacggaacGcagaagaag  
ataactccagcaaagTtgattctTgatGtatcgaagctacctcattGaatccagatgtcTttgtTgtGactcctGcttgaattgatcagTtGc  
tcaccataactcGctgactTgtcTttcctTctcGggTtcatccatcGctGacgatacctGcaaagctTcgtTtTattacctTcgtcaagg  
gaaccgcatctTcGacattcGatggatacattctTgcatcGcctTgctcagaggcaccaaaatcgtTgggatattTactTcgggatgctcattG  
gCGgactcaatcGcactcacgggTactatatctTcaatggcaaaaattTgtGcttgaagtacaagTgacatGccactgtagctccaaaacag  
agctTgcaaaactgtGcagcccagTtctTactaagacgtacaatccaactaaacaattTcagcaagTaaagaccacaaacattTgataca  
aagcattggataattTtGcctTggcattagcGctgtTccaaatacataaatcaagTgtacaagtaagcaacgTaaattaaagacaatccaa  
ccaaggcaaatccataatgatcggTgcgatgtaggaataacacaacatgattactaccaacaaggaataggtgggatacaatacGccccagct  
aggTtgatagactaatccagcgggtcactTTTTgCgGgtgattatccaaaatgctcccagTactTTTgataaagccaaaaccacaattgaa  
gcaagTgcaccaccagggaaTgctaatcctTgataaaaattTgtgagatataatagTggatgctcTtggTaaattagaggccaaaagagacat  
ggcattTtgagTtctcGattacagataccacagcagaactTgtcGcagacgTcacgTgaagaactaagaacctTgaactacatggaaacat  
agaaccaagTtggcagTatctTcaattTcatggatggtaagTccaccacaaactTgcccataattTaatgaacggaggCacaagagacatca  
gaacagcatatGcaacagtaggcaaaaatccagTgataatcccatcaattggaggcattatTgataaacGcaagaagTgcaactTact  
agttaagaagTtgatgTtagaaataccaacGacagctacaggaatggaccagaatataatcatggctgTtaggacggaaTtggcggcGaat  
ctacgggcatatcGctccggTgtagacatagTcaaatcGaccagatgatctcatcaggattaacgtTcaaaagaacacgaccatgCgccaacg  
acggaatTgggaagagtatagaaggctTggaagcattGaaGttgagctTgagatgggaattcaaggataacggagcccactTctTctgtt  
ctTccactTggtTgaagTtcGctGattTgtcGTTcaactTtGcaattTcatcacggcagTaatcaatagaatcaactTTTTccgataagaaaag  
tgaggcggtGttaggacGTTTTcagTaaagaagTgagTtcaagTctgtgggTgattcTTTTgttctTgattattTctTTTTgacggac  
tTgtgatgagTcattcagagTggctTcgtatgTatGccccaaatGctacGTTTTcactTTTTctgaagctTctgataattatGcagTactcaa  
tacgagaggcGttgggaaatGttacGcacgacatctTgtTTTcaagagcatattTgggaagctcGctgatgaccatgTgtgagaagactTgct  
TtgTcatagaggGagaagcctggacagcatGacgaaagacaacatagtaatgtagTtcaggtagatgacaagagTacggaaccaaaga  
agatccaactgagaatacatgtGcataaaagcGgtTgtgattTtcacattggaaaaggagataatatGaatccGctTTTaccgTtTccattgt  
agcattgacggggagcaagatgggtagcagaggatGcaaccaagaagcaaaggaagTaaaggtgaatagataacgTaaaagaagTaa  
gcatcaataaccagcTatcgaatcaacgaagTtTcagaatattTgaagcaagcGagaacccagggaaaaggaccaccaccagcaggttctgg

atttcttctcaggctgagtttgacttcgcatcgagcttgtaaacacgttttcacgaggacgcaagagaatgaagatactcatcataatagcga  
atattaccaaattgaaaaactggagacgaacgcgaagtcgacgacgacgatgacgacgaatttgccattttcaaaaaaat  
cgatgaacaagcaaaaaggtaatttaattttggaaaaacccccctttattggaaaaagaaagcaacacaactatacgaatgaatg  
gtaaatcaataaaaaaagaatattccagtgatacttcaaagaacaaactcatgaaattcagtccttactttgactattgagtgatgagaa  
gattcaggatagaaaaaggaattatcactgtagcaagggcaaacgattttgttccttctgtaaggaaaaagaagagagagacagagacagag  
agaggagaaaaaggggaaaaaggaaaagcaagatttacctaaagaagaatgaaaaataaataataaataaataaataacacacact  
attcagaaaaactaaagaataaagtatgcaaatctattttgcaagaagggtgaaggctgggaaagacaatagtaaaacatgtcaggctactg  
gtatattatataagaggactccagccacatgtcaattttgggaacgaataagggatatgccaatggggacaaatattgaaataaaca  
accatcgaagtgtttgcctgatcaattttgtgactactgttaggccaataaatacattttatcacttgagctgatgatttcatcgtcaagatttt  
cctcgatgaaatagacgacatcatctgagtttaaaattaagagaaaaagcgaagataaaaattgcaataaaaagcaagaataaacaagg  
aacaagtaataaattcaacaaaaaaaaacacaaaaacaaaagaaattgaaaaataatggagacaataaaaggcagagaaaaataat  
caacagccaaatcaacatttcttaacaaagaagatattaggaagaattgttacatcatttaagtacgtagccaaccttattagcgagaactgt  
tgaagtgaagtcattcgtttgtaaaaaaagaaaaacaaaaaaaccaccaatctgcaaacgacattccgggcactttttttttggtc  
tagttgaattcaaaagtattcattgctactgaatttcttcttttgaatatattgaaattgtcgcacttctgtaactgtacagcaatcttctg  
tgtcggtttgttctgatgctcagcttggtggataatcaacatacaataaagaagaatcaaacgaaaaaatgaataaaaccgtttgaa  
gaaaaataatcttgatgaaaggggtgggactcgaaccacgagcttgcactagtgccttaactagctccataaccactcggacaccctc  
cttttatgtttataagatacatcaagaagattagattatgagtgcaacataaaaatacaaaagaacctgatgcttcttcatgttgacgtaatt  
ccctcatggaattttctgtctcgaacccccaaatgagaatccagcttgaatcctgatttcaatttttaataataggtaactgtttct  
cagatgcttctgttctgtcacaagctcatcgtttgctgaatctgacatttttccatatttctggactagaacctctgtcgttaacgaaca  
gtaccagccgattcattcatcacgaaagaactttgttctaaaagattgccaatcatggtctcttctgacttctacttctctcaaatcgag  
agctccgacatagcaatggtcgcaaatgcttctgacgctggcccttgcgccgacgtggatcctcacctcagcttgaacggcgtattttct  
aaaatcctcgttgcgggctggtggactcggctcgaatcctcaaaacctagcgtcagtggttttagagattgcatgcatcgacatggac  
accatcgacgtgaccaacctgaatcgcaattcctctttacggaatgacgttgggaacccaaaggcttctgtagctccaaggctattatgca  
cgtatccctcaacctgtgacagcattccactgcagaatccaagacaagcccccttgagtattacaagcaattccaattggttctgtgactc  
actctgtgaagcccgggtggattaattctaccctgtatctattcaaaagggcgggtattttgcccctgatcgatggaggctccgaaggtc  
aagggtcaagctcgtcattctgcttcaatcactagctgttacgaatgctctcctgatattgtgactcctaagactcctatccaattgtaca  
gccaatactcctcgtttaccgaacactgcgtcgaatgggcttcttctcgaatggccgctgctgctgagcaagtcggaaaacaccaaata  
tctgaagaaatcaattcaggatgaaggctccttgagagaagaagcgtctgtagcttagcaccgctttgacccctgatatccctggcagttg  
actggatcgtagaccatgacgagctcgtgctgctttaaataataacgtagtgaatgatcgtttttgtttgggtatcgtcaaacgtatca  
ttcccgtcgtcttcaaacgctatcattgccgtcgtgctgcaacgaaggtcctcaaatcttactgattgcaatcctcgttgaacattata  
tgatgtttgttggaagatggtacttatacatttacttgaaaaaacgagcagattgttctgctcgggttctcacggaaagctatag  
tactcgaagcccgtcctcctctgttaccctcatcaatcactataagacaacgtatcaacttagccctctgctcgtcactagtggttc  
cccataatttcttaccatcccttacaacaggcaacctcaacaatctatccaaacctgattgattgatctccaagcagcagttagt  
tttacggataaggccttgacaacaagtctatacgtttcttacaggactccgatgagccctgattccttttcttcttactttgcctccctctt  
acttactttatgactatggctttgttactgagcaatgagttctcatatttgattaaattcgtctttttgtaattatagattatacttattgat  
taaattttattttattgttatttttttttttctttcaattcaactactcgtgaaacctgatttccgtttagaatagcaagcctctgagcttt  
gtgaaatagaaactgaataaatccattttctgattttctgaattttcttcttcaacaatttcttagaatcttcttatttattgaattcata  
ttttgttctgttatttattacaagatacaaaactacgttcagttactttattgtatacgtattacaaaagctggtcaaagcatcttctcattgat  
ctcctagatctatcagatagtcgatgaaagaggtttcatctcgggtcttctcttattctttaaacttcttttcttaccaaaaccaaccatt  
tcttttactgtgacaagcttcagttcggattttgccatttctgttacgctatagatttcttctctacactttaaacttgatctcctcaatt  
gcctgacttagcatatcttcttattttaaattgattttcaggactagtttataatccatatttccactgtcatttagcaattgacagcttagt  
ttccttctcgtcattaataagtgttccagttcacatttctgtgctttatataactgttgaattatcggttcttcttattgtgattgcctat  
tgactgaacagtgctaaaaagaacgacccaaaaaaagttcttactattgttagctcattaaatttctgtttttatgcttcttctttttttg  
tactgcttctgactattaaaaacataatataatattgttacaatcttattggacaatttttaattctttgcttcttaattttccaatat  
tctccttgagttcccgtcatcgtccatccaaatcagaaaggtctcgtgctacgccaattaatagccttaacagaaacgtagcagtgcttcc  
cgaattcgaacaccagtagcggatcccaatctcatcagccaaagttccgagattctaatgatattcatcttctgtccgctagactcgcctcgtc  
gtttagggcgcgatgtccccctcacctctccagatgacggatgacgctactattggcaagatcagactctgttcttcatattcat  
cctcgtcctgcttacgcgcttcaacactgaccttcaattccttgggaacaagatgaaagccatccttacttcttctccgagaaccgact

ttcttcagcatatggcttgaaagccctcctctgcccaatggaccatctcccgttcatcacaagaaactagctttcgtccttcgttccatagagcat  
atgattatTTTTgatgtaaggccctccttaattatacaacatccctctgtcactattggttactcctaacatattagacgcattatcatat  
ggttaattctcttccatctaatcccatttttaaaattaggtgtgatggccttgccatctctacgttagttgatcgtctccagttagtcttt  
tcgttcggtggctccgcttcagtggtccgctccgaaatgattgaggtatcccttctccaccaaattgcctttactgttctaatacatgttg  
gcgaggataatccaaatcagtcgttgcacaaccctccttcttattgctttccagatcgttacaggcattgtattcgtattgctcggattcttgc  
gtctcggcaaactcattgaatTTTTcctgccatattctttgggctgcataggtggttggctactttcttgaactgccgaatcgttctct  
agaattgaagatacaaatcttccagttgggagtgcttcttacattattgaacctttacctttcgccggttgatgacgccctttcatggcttta  
tgctgaaattgccaatctcgtcggagccatccgttctaattcctcttttttttttctcctatcctcttactttctggtgtgggcaataccag  
gcttaagcttgaattcctcgggaaacaggttgggtctttctagtactcaaagcaacgtgccatggtaccattattagattatttagctttcga  
gatacaaattgggggtctattttggaaccgtccagaaatgctagccttaacttttccggcatccttcagttccatcaacgttccagctttggct  
atctccactggcatggacagaatagatacagacaaagaattgacggtcatggtataagaactcactttctggctgtataggaagtattcaaat  
tacatgactatacaaatctttaatgttcatacagatctggtggaacaatcgtctatccggagttatgcttgcgttgcgactgccggttactagta  
atgggaccaggaattttcttatattccagtatggactgttggctgctgattttctattgggtatggaattgttaaaggaatccttggggatcca  
gttggcactaccacaaagatagagtatctcacgacgtggctattgtagcttccatgggtatgggtgattttgttttggcatcttactggcattatc  
cttgcatgtgttctttgtctccaagcttagacggtccgctttcgggggatttattcctgcaacatgctgcgttcgacagtagcacgtccttta  
agtcaacagagatttctgaacgaaattggaagcaaatcaaatgtcaaattatccggtttctttctcgtgacaattaacggtgtagaaaagc  
aaattccggtcttatcaggagctacagactacaagcaatccgttgcgttttttaattatcgattttagcttgggttctggagcagattttagtgtgt  
tcaagcattttgaggattcgtcgtcctggctactgcaaacgtcccaatgttgtgtcggattggatgacactcggatcatttaaaaaactta  
gtcagattttttccgaaaacgatatttgcgattgtcaagttttgaagacattaatccgcttggaaatattgtgaaaactgttattagacgaat  
atgatgtatgcgaaatagacttttgggtatccaaggcacactgtcttctactagaagtggggtcaattgaaactggctaaaactttctctccc  
tcaccgctgatgactgttacgtgaagttgcagcgtctaccgtgaaagatgagtcgaaagagatacggatacgaacaatagctaagtatca  
acaaccattccgctccttatgcaagatttgggtgaagttacctcaagagagatgatttctggttatccattggccatatttaagaaaagcttgc  
taaaaaaggagatgctcttggagaaaggtgatcctcctaactgctttgtcctcgtagagacaggtatggtgaaagctacgtatcaaatggat  
agagaagtttggctgaaaacattacctgtctgtcttgggtgaattaccgtttttagtcaaacatgctataatgccacagtgacggcccaggt  
ggattctattatcgtgtatattggatagagaatcatgggaatctcttgaattccttggataatggacatgacgtgacgaatgaaatgttgcgaattg  
cattgaaaatgaccctgaaacagtgatatttactaatttctgcttgaactgtatcgttgaattatcaaagtataatattaatctctcaacata  
attttactagaaaagtactaataactcattgtttttatgcttgggctaaatcaacctctatggttggtaaataatgtttgtatcttctgattataat  
cggacataagaagaatagcaacatgattcttccattcgaagaaataagttgattttatcttttacagaaagtaataaaactgtttaaagtttagca  
gaatggtaatcgttattcccagattgttacctaaaacaatgaaagtgaagcataacgatcaacctttcaggagattgagtaattagctgtcaa  
aaaaaggatactgaagtagaataataaacttaagcaattttctatatacggtttttttaaccaagcattcattgtttacataaaataaca  
tgaagtaacgctgctacttccagcaagagtaagtacagcacttcaataactgtctatgtattatactctctaattaacattattctttcaaa  
caagcaaatcagtaaagattctcttgaatttaaaaattgagtgatatttaagctgtgagattaaatcctgaaacctttctacacatcagtta  
agttggttctgaagttgcgttgcgatacaatgtgctttacgttatgttgaacagtttattcttgattaatgaaagcgaattgatttggtaaag  
atgtaaaaatttctgatgataattgcaggttgagtagcttttgagagctgtcctcgtcaaatcacaaccctgtaataaaaatggataagcatatc  
cccctttcctgctccagtgtagtaccagaaaggcgaatgaagacagctgattcgtggttatgatcccgttatttctcctgcttattgattcaagct  
gaattagcagcttctgatatttctgacttctgtatcagcgcgtcaagcctcagatattatttctggacgtgataatcgtattctgttattg  
tcggacctgtctattcatgatcctgctcggctaaggaatagctggcaggttcaaaaggaagctgcaagcacaagaaggattgcacata  
attatgcgtgcttacctgaaaagccagctactaccgtcggttggaagggttgattaatgatcctgatttggacggctctataacatcaacaagg  
gatccgctttctcgtggtacatattggagctcttgagcaaggttgggtatcgtctgagatgcttgataaccattagccccaataactggca  
gatttgggttctgggggtctattggtgctgaccactgaatctcaattacaccgtgagcttgcctcgtgattgtcattccctattggttcaaaaac  
gctactgatgtaaatattggcattgctattgatgctatcaattccttagcaatcctcaccacttctgtctgttaccagcaaggtgttggccatc  
gtcactaccgatggcaacctgatccacattatcttaagaggtggtaaaaaggaaccaacttcgacgtcctctgtaatacaagtaaggc  
tgatctgaaaaggctaaactcaccaagcattatgattgattgctctcagggcaactcttgaaggatcatacaaccaaccaagggttccgc  
ttcatagctgagcaggttcttctggtcaaaccgcattagtggtattatgattgaatcccattcaatgagggcaagcagctatccctgaggat  
ggcctgctaacctaaagtagtggcttagtgctactgatgctgtattagttgggaacaaccgtcgtgttttgaacattggctactgctgctc  
tgaacgtgactaaattgtcatctgcttaagatgaagtaaaatTTTTgtattatgaaaagtagtttagctattgtacctgattaacatcttggca  
cagaagtataataattttagatttaacttagctttatgaatagcttgggattcgggatccaaaaataataggagctttttgtataaa  
gtactcactagaaaatgaagattgaaacctgttccacacgcaagctctacacattcagtagtgcaatattttagtcaatataaaatcctaaa

tccattaagt cattaataaaagataataccggctgctcatgattgcctcagagaaaacgaaagtaatgaaaagaaaacgatatgagaagag  
cggatcaaccacttatcttccttataaaaaatgtaagccaaaagagacttatgtatattttgaaaaatgctaagcacaatgtaatacaaaa  
aaaaagttgattctcgaatcgctccgagaacttattgcaaaaactaattatgtaataaagattcgatcgaagaacgcgatgacggtaag  
taaaatatctaaatgagcgatattaatatgggtgcataaaaaactccagacttgaaatgttatagattgaagaagagccaatttctcaca  
attctcaagacactgctggctctgtaatgattgggtcaaaggcggaccagtgctgcaaaatctcactctcctaataatgttcgacttgagc  
gattctggaataagaaaaattacattttcagcatagtttgataaacagaacactgtatgatataaagcttataaactattgaatggaatccattgt  
caatgcactcctgaagacccttagttttcagacgaaataatagattcggctgatacgataaactgtatgacctttgcaccatttagccatgga  
gcagttggctcctgcacatccgacattacctgaggttgatgtgagaggccgtgttcacagtcacatagggaagaagatgaaattcctcaa  
gcttcagggtgattctcgaatccaataactcacgtttccaaatttgtaaaatccttcgaaaactgagaatcccttaatacattcataacca  
gacgtcaacactggactgaaaggcctaattatagctaatttctcctcaaatctgaagcacagaacgctgaaattgtaacgtcgatcgttacg  
gaagtattgctgcttgcggacttgacttgctatgtaagatttataaaagtccatccagcatcacgtttgtgtgactgactgagtaaccac  
gtttatgagacggcttctgttttgattaatattcgcaattagctctgcaaaagctgataagataaaatcagatcaggacgttcaggactactctcc  
ggagtagcatcaataatctttgcagcaataaaggatactcagaaggcgtgaagtggtttaataattaactacctaataccaagcattcgtga  
aattgtgcaacatgtgatccccctgtgacccaagaagagacagcaggcttctctccatttagtgatgatacggaaaacggcatcttgccgg  
ttacaataaccggaataaatctggctaataatcggtcaaactctcaagaaaaacaggccaaggtgcaaggagacggatcaaaaagctcgta  
ctttcatttacagccaagctcctcacctcctttgtataatcgataatgaaatcaaccgaaaaagtaaggaggggctcaatatccccgaaaaa  
gtttgaatatcgataacattcaaaacactgcattcatgaacgcgtaagccataaactgttgaatagcgattaggtcattaagataattggcttcg  
gttgaactaattctgaaatgagattcgcccttttctaattcgttgaatcgggaggcagcggcgtgacatgtgtagggtgtcgaaccgtcatt  
aagactagttggagtaggggcatcgagctgcctagctgaaaatctgagtttaagtcatccatgggattatcagctttaaaggaaggggaatcga  
ctttgttacggagaagaggagagtggttgggaaaggaaagatgtgctagaggaataagaggaaggaatatgctgtaatgtcgcactagagc  
aatcttcttatcgatggtaaccgaactcgagttctgaggagaaaaggagaagaagaattgtcaatgtttgactactatcggtatcagagagtc  
tacgtccaaagataatgaatcaagactaaaatctgttttcttggtaacctgcatctacaggcaaacgtcgaggatttttaggatagacag  
aggcttctgggagaggaaatatttctgttttccacttggattttcagaattcagtgacagtgcttcgagtgaggttaaccgaaaggatccc  
tctgaaaagtacctcgggttgagaactagaggaacaggtgcatcaagcggtttccaagtatgcgagcaaacggctcttaaactgcctc  
acttcgaggacttaaatcaaaataactcgacgagaagagccatcaagctttattgaccgagccaagtcaatagaaggtcaggttgag  
gaagaaaactctgacagagaaaaactcaaatctacggatttccgcttatacaaggcgtacgctgcaatttagtagcattaggaggccttgga  
agtctcgattgaaaatgttccatcgtgtcgtctatacaattcatalcagagtcagagaaaatgaaccatttcgggaactactgtacttcaaaa  
agatggagatgacatagaagtgtatttttctatcacaacaaaacatataggaaaataaataacaggaaagaatgaatttctcgtgtttacat  
caagagaaaacagagtaacgtgtatgggtgagtaacattacgtttgtgtccccagatgtcttttctgttggtatattttgtaagaatgcgctaaa  
atgaataagaaggttatgaaaatgcttaataaacaacaaatataaaacaacaaaataaaaatcaatgccgttgggttgactacacgac  
ataatggattcctgtctgaaatgagtagagaaatagttgattttgtaactgcaacaaaagaatgctactgaacagtcctcagatgtactgtct  
ctcgaagttgaaatcgaactaaactgttttctgataaacataatctatattcagaaagttccctaggaattaattttgtttattaactac  
atattgcgaactaatggaatagcgaacaaaactaatcgaatcatcatgaaattgagaatctatgcaacgtaagaagcgaacaaaaggatg  
accctatgtaaaaagaatgtacgtctgcagaaagaagaagtaataataaatacataagaagaataaaggaaacaggaagagagatc  
caacctggaatcacagagatagatttctgatgacggtttcaactggacaccagcaatacagtcgggaacgacgcgctacacatcatattt  
acaaggacagccttgcacggcgttttacttggagggctaagtccgaaactccgaaagctttcaagccatatattatcaaacgtatcaagg  
aagcctgggtgtaagagattctttcaactgactctcaacatactggacagatggatccaagaagaattctgttcaagaatgtttgaaat  
gcaattcgaacggtgaaacatcgattgttttgcgtagtaatatctgtgctattcgaaccccggtctgacctatgtttgggtctccttgccattt  
ctaaatgcaatacgtttgaaagcaaggaatcctgagggttaaatgggtaggggcttagcaagttctgtgctgtaggaggtagaacctggaa  
ggaattgtgggtggtgtatgtaaggaaggatgtcttctgctctattgaagcaacagacaatgcaggtaaagatcctgatagcttattcgttct  
cataaaccaatcgtcactggaagcagttttctcaacgagcactagggtttgcaagcgtttgttggattccagaataatattggacgcagg  
gtcattccaatgcgaggttaatttccagttgatgagaagtcattattctgtagcttgaaccttataaactttcaaaaaggcaaaaagc  
gatatacgaattcagacaaaacgaattctcagttgaaatttcaactcgagtaattcttttgcttagagctcaaaaactgaatttacga  
acttcgatgaaggtccggtaagttactttctattctgagctgaactgaattgtcttcagggtttgttggccttatgcgccgactttattaca  
gcaggtagcaatagatactgttactacagtaataaacaacgtacatagaaaaatgaaaaaatggacatatcgtttaaagagaacatagta  
gttcaacaagaatatctatttcttagttatttcatagctgatctgaattatgaaaggctgaataactcactctgtctataaaaactcttc  
gccttgactactggattctcaagcaattcaaatgatcttgggtgtcttccacccttattcacgacaaaagatcgcattctaccgtgatgga  
agccaactactggaactcataacctgtccatacttataaacaccagaatgatgaaacctcaagtttctcgaatcaatccgtcaaaaagca



actcattcgtcctgcaaacggcttttcttctccttacagagcatacttacttacttacgattcttacttctcctcaaaacaatccagatttcttca  
catagtatagcttactgcaacttgagatgtttccatgatcaatcacaacagaccttcaaactattttctatataaggcaaaggagcaaaacc  
aggtagaatacattcttctatgtgacagaagcgtataatataaccatttaattacttcttctcagcttctcagcgcctcaccaccacttctt  
gttgagcgaggagcttttcttgcagcgaccagggcgccaccaccataaggagaggtaagggcaaagtcaatgtgcttttgggagtcaa  
acggacgacgaaagagggaacattgacaattgcttaccaacacggatgtgacgttggtagatcaagacacgagcgtggatggacttggcc  
aaaccaagcttgaaaacttgagttgcaaacgacgtccaaaaagtctcaaggcgaagagcaagacataatcaagcttcatacgggttcat  
ccaagataccaaaacgaacaagacggcgaatgatagcattaccctcaaaagacgcttaggatccttctcgtcaagggtcaaagctcacgagca  
gcacgacggatcttcgagagagtaagggaacacgcccagatttcatgctgtttctcaaaccatattcaccagcaagcttgagttcagcgtcaag  
acgagctgactcgaaggagcagcagggcacctttaggtcttggattgcttgcgctattttcagttagtaattttcacatattactattctaaag  
ataacttacaggtgcggaaggcattttgtggtgaggaaaactacacaccttcagacatggatgtgtgtgcaccgtgactcgtctcatatag  
ggtagggttacttagaatgtaaaattcaaccttcttcgatatctatctacctatgtttttctgtaattacttattaattgtatgattatgctttt  
tgaacagttgcttaattggattagcttctcattataaactagacgttgggttcttcggaaaaacgggttcaagaaagtattcaggatcatatag  
aaactctttttctgaaatgtgctttttagatgatttttaatttatattttctataatcatgtatacaaagttaggggttgttcgaagttagcg  
tacagatactaaagctgaagtagatataattcatcaatgaatatcaaatatttagtcataggaataattatttgaactgaaaggttaagttctgat  
caatgaaacggtagtcatcttgttcttaattctttctccatcgttaccagtgtgacgttttcgagggttagtaggaacacaaaacaaacggttagat  
ttcatagcatttctgtaggggatttctgaataatcggatcatcagatataacttttagtaggtgaatcgtcaggcattgcccagtgagcagctgtg  
gtgactgaaaactagtaataaaggaagttcttttcgaggtgtagcttgcactaagacagatttagattgcttttctgattaaagtcttaattca  
tcggataaactatccacagaattaagggtctttagcagtagtaaggcttcttctgatactcccactggcttcttctgctaaaccattattgaaac  
agtactagccaacaacagtttttcgtaaatgataattcgaagtgttatttagtgggggttcttcaactaagagaacttcgatgctgaactaatgat  
ccagaggaaggaagcgtacttctctgtttcgaattcgtacatgttatttagtgcgctttttcatatcttttcacctaagatgttctggagtcagaa  
cgcgtaagattctgtattgaagaaaagcttcttgcgcttaagattggacgatttagtatcaactggcaggagcagcagcagcagcagccga  
attcgtactatgtaatcttttaagagaggagatagagtcctgatttagacctagatagcaattagaacggcgtgaaatagttagcacgtggattc  
gcaaaatctgggagcaaaagttaaaccattacatttcttaacaaaaccctgtaatcttagggaacttagaggaataaaaagggaatgattccctct  
ttacaaaatctcagcaataaattctcggtagaattaggaggcttttctcaattgttctgcaatacacaatccatcaaacacaaaactcaattgga  
gctgaacctttcaataaattagggtggtctttttctttttcattcttagaattcaatttctgtttttgtttatctcgagaatctttctgatttga  
tattctgggtgatttttagcagtaataaagcacttcaagtaattaggacctcagctcatattctttgcttttaagggaagaaaattctttaata  
aatccggcttttactttcgaactatcttgatttagagcattttgtaaccactgtcgatatccacaagttcacattctgaagcgccgtcatcgag  
ctccaaatgccaagcttttccgtccaaatgattttgaaagcaactttgtaattttctttccacgcttctaccgacctatacttgataaatttta  
aagctcgtctataaaacttcatctttggttttcgaaagtattccaaagcatgtgtctgtattttccgaccaactgcttagcgtaaaatactacagg  
tgttttggatcagcaattgataaaatccgtttcctaaagtgaatgaattagattcctcagagttggcacagcctctccaaatgaaatattctaa  
tatcatctgttattctgttgatattttctgattgttccaaagtaggctgagaagggaagcaactgttactaaatgcttcttactcttttca  
tttgcaacgaggaacctgactgaatgtcatgaagagcttttccataaagtctgaggataaaagagaatctgttctcactagtcttttcaaggct  
ttgcagatgagccagactctatagaagcgtcagaggactccgatgattgatgattggcaatcaccttcagcagcctaaattcaacttgatctgaaa  
gaagcattaaagcatagcagattatctcaacatgttcaatggactgttgcacttccatataatcgttttgacacgtccaaggagtagcttcatgcca  
gctggccgaataactaaaactgtaagagagcatgaaaactcgtgataatgagcagaatacaccatcttaagcaataatactgtcttggtag  
gtttataatgggccaacttccatatacagactttccagttgaaaggtcctgtaaacaatggtaattcgtactattttccataatagatacat  
cctaacatacccttatacaaaatgactttttaatgcatggctatttccataagactcaatcttcagggttcaactgaatccaagattttgttttt  
ccagttaacagatcttcagctctttctacctaactgatgtgctttaaaccacaataccataaggtagccgatgcgaaagtaggtgatacaaac  
caaacgatagtcagacatataactattgtcttcaagtcacggaaattataactaacaagtataattaattaatggaaaatgaaataaggaa  
ttaggtagcaggactccaagccgagaattgaattttgtatttttagctactaaatagctaataatataatagattagaaggaatgctatcgataggc  
agggttgacgaattttgatgtatgaataggcaagtcaactagtagccctgcaaaaatcttcttagcgtttttctgtttatagtctgtttgcttataatt  
ttcaattttagttcataaatccattgctctttggattttacttttgaaagtcaatttatattcattgattacctgattttgcatttccaatcgtttctg  
tttaaatgactgacaaaacaataactctgtagtattatgggcatagaagaataagaggttccaaatcagcgggttgatggctgaaaattac  
acgttattagaatgtaattcaagcataagaacaaaataactactttatgggcactaataatgtccggagacctggtaactctggaatgtaaga  
gaaaacgatctcattaccagatcagtggaagtcttttagactggaagactcaactatagagtcagggatataatagtctctctaatcaaataa  
ctagaagatattgtcactaataaagaatatacaactgtatgactcatcatctctatcaaaatttttaatttctgtaacgcaatgattctatgagg  
ttattatattagcgaattttgtatctcaacaaaggggaccggatcgactgtgtgacacctatttttcatgtcatcatccataaacag  
ctaaaaactgtgcatgggagatcacgactaactcgaatagaccatcagctcaccattattgtgtttggcaagtaactctgctaaactagactt

tttgcagaccgagagaaagatcatgcttctacacctaggattgtatatcagaagtttgattaccgacctaacattcaatttttttctgtattttc  
agtgtcatagtttttaacctcatatgaaagtaaatagtagcagtttgaaatgtgagtaactagacattttacacaattctgataatgaaatcataat  
ccatcgaaaaagcatgttaaaaaacaacattttggtaaagaaagtgtattctttatcaaaactattgatctatcataaaaaacaccaacctcacctt  
tgtttatgattgtcatttctcctgaagaggaattatgaatagcgaattcgctaggaactccaaaaagcaagtgcttatgcaattccaagtactac  
acaaactgtcgtctgatttttcatggattgtacttagcgattggagcagtcacttaacagtgttgtaaccaatttggccaatgtcgaagct  
cggcaaatcaaggggttctggtattaaagctgcgaaatagatcagataaccgaacatcttctacaagaggagtagacaagcatgattattacga  
accgaatcgctcaggggggaatcatataaaattatacgtttatgggatactattgttaatatgtctttccctgtttagaagtgtggtgtgcaactgt  
tcgacatttcatggagctgtcttacatctacagatttaagtactatttataaaagagctttaccatccatcgatcgtgtttattggtgtatagt  
aatcggtgctgaaccttttagtgaatctaaggttcagtaatagcagtaaatgtgttagctggtccgtttgctttcaaaagtatattcggccggtgt  
agcaaaacaaaattagatgaatcttgactgtaaaatgacaagtaaaatataaaagaaaattctttacaaattctagataacaattacagtttctaa  
atcttcttaaaagcgttttgggtggaattttggtagcattacgtcattgccacaatagggttttagttaacattataaatataatggtttggattgg  
aatgaaacattattgaatatcagcaataatcataagccaaaagaatcgctctgttatgtaaagtaaaaaacgattaagggtgtgatacaaaaa  
tcataagtataacgtcgaagcggaaactataagaaaaggatcagattacaattactacattagagagactatataacctatggctctacagtta  
aaagttccagctcaaaaagacttcaactgatctggttaaatgagatcgttttcttaccattccagagtaaccaggtctccggacattattagtccc  
ataaaagtagtttttggttcttatgcttgaattacattctaataacgtgtaatttttcagccgtgacaagaaggacttctgattgtataagtaca  
aggctgtcttatactcaatccaagaagaggtatataaaaaattgaattaccttagttccattcacgtattttccggcatagctatatac  
atcaatttgggtgactctaacaaaaagatggatgattggtccattgaatatatacatgtgaaatgttatatttactttgctattattatcgacgc  
ttacaaaatcagtataggaaacagaacgagtaaaaatgacaaaagaaatataaaaaattggatttcacaaaaaagaagaataatttataggt  
ctatattccttaaacagtttataaaaaacttggtttgcagtatgaaatttttctgactgctgtcaaataggattagagatataaaaggga  
ctgttctacagtttggccatggcatcaagatataaaaaacgcaaatagttaaactgtcacaaccgcttttgaagaaaacatcgtaa  
aaaccatagtcatacaaaaaaggttgcaggacgcacgaacatggagttgggaaaaggccctgtaagtctgtttggattgcgggatttctga  
caaatgaccgttcttcaatatataaaaagtaaaatgaaagtcataccaataaaaattgacaaaaaagtaaaacatcaaacctcctcaaaa  
tttgacaaaagaatcggtgagtgaggagagcattaatatacaggagaagccaataggcctttggcaaaaagtgtaacttttagtacgagcaaaaag  
agtattgcgctaaagttattcatagctttgctacaagtcataacatgagatgcatcattcattggaacataattaacaggatcgcatcgacttctat  
ggtttcatagaacgctttatataccccgtgtaaaatgtaaactctggatagtaaagaaaggataacgatgactattcatttgcgatccatattt  
cgaaagtgaatgctagatggggagctctgtgtgactatgctcaaatgaaagataagagctatccgatgcacagaggcttattgaaaaatgt  
atcaacaactgcttggtttagattatagcattggttaatatggcctcccaatactcactcaaatcgacaatccacaattatacattcgt  
cataaatactttataataccatccaaaagtttaataaagatcctgactgattcgctttaaagaatcctccttgacgcaaaaacagggcaaaag  
aaagggttccatagagaagacatataattcatcagagtccttaagcgggtgcttaggcgtagcaaaatgggtgcttgatccccataaaccta  
gttttagtcgacttataaaaacatactcgggtgcgacgaagcaccggtgatctgttcatcaagtcgttttcttattagcagccatggctaaagg  
agtaggaggaatgtcctgaaattgttaaaaggcaacgaaatgtgtcgggggatcctttgacaggagacgcttggacaaaatcatccaacgaa  
tggatcatcatgattcgtcttctgtatagcaacgtcaaagataccctttcatcctctgtgtcaatttgattaccataacatcgccaactatcat  
ccatgtaactttgctcatggtccgacacagtgtaacctcatccatatactgctcaagcaactgaaaaataccagtagagttgctagattgact  
gcaagtacgcgatacagcataagataattgtttatttacttgggagtggttaggcttacgtttgtaacggagtagcagcaactggagcgtgattg  
aaggaaacggaggtgattagttgaagaacgagaacgagtgccggttggaagagtagcaagtaacggaatttttctgcttgaactgcgaga  
agaatcatttaattagaagaaaaggacatagaagatttggtttaaaacttgaagcaatggaacaggtctaggagaatctaggttgggggag  
actatgtccgtaaaacttttagggaggttgaagaagtaagaaggtgacaaagcagcgtcagagggactctatctaaaggagaggttagcag  
aagcatccgaggaggtgtaacagtaagaaaaagagcgaatagtgtagcgtcagaggagttggaaggcagggctcctgtcaatgtgca  
tattcatagaaaagtctgaggcaaggaagacgcaggggagcagaggagcgttttcaaaaagggtccatcaacgaggcatgaggcttag  
acttttgaagaatgaatccaaatcggcagtgaggattaatatttctggttcaagacgcaagcttcgagctgcaggacggataatgcgttgcctat  
tagaaagagattgggacagagagagggaagacagaggggagtcctatagttttagagaaaaaacacaagcggcagatatttggttataat  
acgaaatattaaggaaaataggttaaaaggaatagctgtaaaaagaaaagaccgaaaaagaacgaacttggtaggcaacaaagaaaagg  
caaacgaaggaacagaacaaaagaggaggatttaataaaaagaaagataaaaagaaaacaaattctaatttatccttgaaggaatgaagga  
aaaaggccaaatgctaagtgagaaaaagaaaggagacagacaaaagagagaagaaaaataaaaactaaaagtaaatctctgcttagca  
ataaaaaagatttaaaagagtggtgatccgtgcagagagaaccggcaaaaggggaaaagggtaaaggcacaaggaggtgaaaaaaa  
gagacaacaaaactgtaacagactttatttaccagtaaccagatgaaatcgacaaaaaaaattcgattagaaaatgaattagaaaaaa  
agcaggttaaaaatagctttggatggtttatttggaaagaaacctcaatcgtcttcagagaaacacaaaaagtaaccggatctagcaaac  
gctagcacaagtgacaccgcttttttaataaacagaaagcaacgggaaacgtctgtcaatcactcgagaaaaatctactgttccacggtag

tggggacaagaggacgatataaggggctgaatcaacgaaaacaaacaccaacggtaagaacacagctactaatgctttgcaaacaccaatat  
atagctcaaaatggaactatgaaaagcaacctacaacagcttcaaacgccaatagaacaacgggtaatgagaagcagctatcgagcagaa  
cgactctcctcaaatagtaagcaataaaaaaaaaattggtctaaaaggatggaatttggcgtttgaagtagttgtagaaggaaagtgtcat  
ctttcccacttctaggtggagacttcccagagggaacaaaacaaatctgagtaacatggctatttcaattacgtcctcgtaataacaagtaa  
cagaacccttctgcaattgtcaaaaatataatcgctttcattacaaaatgaaatgcacaagaagctagaatTTTTTctgtaaaaaagcttttgatc  
gtcatttgaattctatcattcattgaaattgctatatttgcacggataacgtcatgtgcgtacaagtaacatcgtccttctgtaaaaaacagca  
acaaacgaaaaagaatttaatgcatccaaacaaagaatcaatcagtttagttgacaatcaaatagcttgtttatattgaaatgaacgatctgat  
tcttgttccgcaactttgtttaccatcagttgtctgtgtaaccatcagctataataggtaaataaacctctcttataatccgatatacttccggttt  
gcttgatttccgcatagttaatgaagaaatagatgtattttgaaaagaaaatcgttaaaacaaaagtttctcaaatttccaatttcaattttcga  
aactctgtcgtttttccatgttctctatctgctgacatgtttttttaaataaacaattcttagcttattgatgcctatgctactacactt  
cactgccactagttttcatttttacttcttcaaatgtcaataccttttctgtaccgaaaaaagtttctgttactatccttcaataaaaactca  
ttcggccaaggataatcccaaatgaaagtcttattcattcaaaaatcactcgtaggatgaaagacaattagtgtaggttattccaacata  
tcaacttagaaatataaaagtgagttcgtctgtttcagcgtgaagacactatTTTaataggcttcatgccctgtcatcaccacaaaa  
tatagtcgacactatagtagaaagatccctagaatggaacaaataaaagatactctattcatacgtccttcaatattttaagagcgagac  
ctttcaaatgttactttcagcctacatacactttgatgcatcaaaaagagattcaagacatctaatctatattgggaggtagcctttagtttcc  
ttagttcttgactctggatctcaaaatccttagttaaaagccttaccctggcttgagagcactcaccaagctgcaccaacaccactacatctt  
cggcaggagtagtgataaccttactgccaatctctcaccaagaatttcttaaaggcagcttctaaacgcttctaaagtgagggtactgttga  
aacactgccatcagtagcaacatcagggttgcctttagctttaggacaatggcgcaaacaccacaggcagataaacgggagcagcgggta  
ccaatcaattcgcagacacggcgatcaaatgacgcttctctcagtagtggttaacccatagggttctcaagcaactgttgagtctatccaaa  
ttttcaaaaggatccactcgatcactcagcagaggtatccatagccaatggatcacgaagcttggtagcattttggcctgcaacaagata  
ccctgctcatgcaaatccaaaagaatgcgcgcaaaatgtctccatataacagccagcaatcatctttctgatgttggcaaacaggagcagg  
gtggtcagcatcaatagccaatcacttggtagcagcagaacaacatgctgattgtcaaagtcgaccattcacaattaataatcatgggca  
tgtctcggggaaattataaccgtgaagcttggggatctcatcaaaagcctcgatgtagcaagcattgcaaccggtagcgaatgacaccagc  
ctcagtagcctggttagtgtagtttaggcaacaaagtagcaggtggtatcgttcaatacagcattcaaaagtcacattgttgcaaccaacagctt  
aaagcatggtgaacataggaacaatgctttcacctcaacaccagcaatatcaaatccctggccaagcaatcaagattgcttcatcaattgag  
ggtgtttgcaagggtaggaaaaggtaaagccaatctcaattgctgtgcctcagggtgattttctgcaaaaacttctaacacaggtagca  
atgtagtcaaaaagttcatcacgagtagcagcttcaaggcttaggcatgcatatttgtttgcatgatgtcgaatttgcggttacctgaacatc  
aacctcagatagcaaatagtagcaccatgtcaaggccaaataggaaccagctctgagccatcaggacagctagtaaccaggtaggc  
accataggaatgtcacctggtcagtagtcaagcccttctcaactcggacacaaaacgttcagtagcgcctcaagagatccgtagaaacagt  
gaatttatattcaaatcatctaggtgctccgcaatgtttgtcaactgtatcgtgacccttacgagaaggtagcgggaaggccaatggtaa  
gcatcgcgcaaaagacattatttaataaagctctaaaatcttaaggaacgaaaacaaaatgagaaaaaagaagatgaagtcaagcagtgaa  
ggatgccagagaatccaaaattcaatgaaactaataactaaacaaaggataaaagaactttcgcaaaaccgacaaaattacctgtcgcg  
tttacttcaaaaagatcaagttgaaggattggttagggaagaatcaaccgactgttaagcattccgaaaggaagggtatgacaccaatac  
agctacaatatcaatcaggcttgggtgactatcatgtatcatagaaaatTTTaatctttaggaaattgaaataaaagattcatcactgaaaat  
gacttagcttccgtagttactccaatgtttattgatactgctgctattagaagttaaaatgtgtaaaacgtaggttgataatgtataatccttag  
ataaactctactaatatggactttatcaaaatcataataaatattcggaagcttcttcttcaaaatggaatatcctctatggagttaccga  
aaatttctaccagagtggtaagtaatcatcaggctgaaagaataaatattccttctggaatcaacaaaagcaaacgacattggcaataatc  
cggccgacttaatccaaaaatcatcatcaactacagcaactgattttaggagattgcatcgaagctttaaTTTTTctgcttctttaaata  
aatataaagctgttaagctaggtattcatatagcagcgttttctgctgaacgttgcaaatattcacgttcaatcaaacctcaattcgcggttga  
tcattataggatttggctggaatcgagaactcagttgacgagtaactcggccactaattgattgttcaagcgttttccgatccctgtttgtag  
ttgatagtcattcattaataaatgaaacttacttacttactgactatacaagcatctgctgatgcttctagattcatcaaccttctcattgttc  
gtttcgttcccatcgttcttacacgaacctgcgcaacgggtggatattttaaattcttccatatttgacgtaaaattatcattaacgtaaactgat  
caccagcgttaatatctgacttttggcttctcagtaagattttatatttagcgaagaaagactttgaaggtagcttcaaatcccagggttca  
atcttgttcttgaagtaactcttctgaagataaacttctcgattctgataaatttgaattgtaaaaggatgatgagagctatagtagacacatt  
aaggctgcttctgttctgaattgactcgaacatcggcgttccctaataaatattagcgaagtcaatttcatacaagctgttaacgtaccat  
tgagggataccaaatagtttctccgtagtttggaaaagtaaaaattgaaaaatgttcaatagaaggcttcaaacctcgggaaattcaca  
cttaacttttcaggaacaaggtcaatagccagaaggacgaagccaatacagatacattcagctcgaatggaggctaatctgttagaacgac  
agcagttgaagcttctaccctttagattcttgatcatattgtcctttatattcatgtagtaactcttagataatcgcataatcgaagtttagcga

aatcaagtttttaacgaactaccgtaaacattccctccaattttggtaaaaacatttctgcttctgctttaaacgacctatcatgcttaattca  
gcatcatctgatgatgatctattatttaaagcctgtaaattgcagaaagactgcacagaaaaataaagactataccttttcgcaaatgtgttt  
atagatttttcaaaaacatcttttcagatagaaaacggaaaagaacaacagaatttgcaatgtctttccacagattctcggatcgctcttca  
aatctttttcagggtatcatcaatgaacaaagaagtgaattcgggagctcttgatgatcggttatgaaattagcaaaaagactgaaagagaat  
ttagtcacatcggcttctctcatgcttcaaccactactcacgaagcttatcccaaatccaatactttcgttacccatgagggaagcagttgaa  
acttttggataacctgcgagtttctgtacttcttttctcacagtcacagaactattaataagctttcttttcagaaatataagaggcaaaa  
aatctttttatcgaaggataaccaactctactatggaaaacatattgtaaagagaagatagcccttagattatacagagcaagcatggcgaa  
aaagcccgtaacaggactccaacagattatctaaatgttggtaaaaagttcattctccaccacggaaagtaagcaaaaagaaactttggta  
atagatactttgagctctctttttcttccaatcttgaattggtttttcaagatattcgagaacaccatacatccgaaagtttgatgagcttct  
tctcgatagaatacgcgagtcaggtccaagaatttgaagtgaataaaacatcatacaatgattcattcttagactcagatgggagagagtttagc  
atatcaaaacaagaattaataatggacgattattgaatccaatcgcctcaagtaaaactaaagtaagaatacagatcagctttttgcccg  
atctcgagggaactcagaagtacggaatctcgaagataattagaccggcatcgtagatgggcataaacctgaaattttgaataaactttgtct  
agatactcagtaactggaaatcatttgcatagataactagtgctttccatgcattcacgagattagataaaaacaaaattgctgctcacgct  
ttctcattgacaatgaaaaatcatcttggctcgaacatagctccaatctcagcttctaataaagatccaaagttcccagctatggataatgctact  
tcaatctcagctctgcctcaatacttcttaacatcgctatagagctgttctccatgcttgaaggacaagcttgacgatttctataaagctcc  
tcaaaagagagttgggatgtactcttgggaagatacttgcacagcattatgtaaaacatccaatgagcgttgaatctactgattcgaagtg  
aactaaacagttagaaaactcatgttctctcatcgtcttatgatatacattaacccttactttctggtgctcgaattttactttgatgagcgt  
gattgacgtcctaatttttttaaaactaaaattctgtttatctaattgaaggaaggagcgaacacaatacaactcctgagcacagtggtgag  
gttaaaatgttggaatgtgatacgttcaatcccatacgtactggcaaccaatctaaacaccaactataggatgttgaaaaatgaagatctc  
caaagaatcttaataaattcaataaattactaccgcatcgatacttagcggcctgtaggcagaataccttttttaaaaggcaaacagat  
ttttcgcaaaaagcgtttcataacagtagtattgtcgaacgatgcaaaagtccaatctcaaaagctactggggaattagaacaaccaaaag  
cctgcatatcatatcactttactgactgtgaagttataaagcgccatgttcggatgaagctaatacagacagttgcaatcatcgttctggtca  
taagttatcgaacaagcatatcacaatggtactgttttgggaatgtcccaatgcaagaaccgacacctatggcagaccatctaaaaatctt  
tagtgataaacgagtaaccattgaagatattatcacaataaaggagagatgttgaagaaggatagccaaatgttgacggaatgtggtg  
agattgaaccagacaattgaaacttaagaccaatctgaaggagcctccactgataaatcttctctgattcaagcaactgattttttacttct  
ttttagtggttattgaggatacatatggataacgaaaaatatactagcagcttatttttggacatacaagtcataagaaaacatttatgaaatg  
tctcagacaagctgtactagaataaaagtaaacctttaaagctcaatataagtaactagtgagcaatgattctaattttttctttcttttttt  
tatcatttctcaaaaagtagttgttacgtgtaagctcggtaaatagacttaaaagttaattggaataagaggacgttaaaagttgttatatga  
ccgtaataaagtgctgctgtaaatgctttgtttatgttacgcaccctatgcttccaatcttccaatccctcgtttctctgatgtttgagacatgc  
tcgaatctccaatacaatgtattagagacttcaactagagattggaggccttctcatctcactaataaattacaatccagctcgaagagtcg  
atcttctcgttcatcgcaggtatctgcgcaagacttagaaaagccaaaactgcttggcttctggtttagtttttttactattctgttcttggat  
cgattattatctggcctgtttcgactgtttggggttagcaatggtgagtttttaagttgaggtcgtggtggcgaatatcaacagttgatgaatg  
tatagctaagcacccttaattcattaatcttgaaaaacacttgaaccaggatggatgtttggaagaaagttgacgtcctcgatcatcaatagc  
tagctttcgagaaaatagcctattttacttggagtaattgctggctatcttctctggaatgccattcgattgatttttctcataaagtcaggat  
aagttggcattgaaaaatagatcgtttctggtttcaatggtatcttctcattgatcgtctatggctcgtgaatgatatagtttttctatcgtctcat  
ttactacctaatcttaaaagtttctgagaccacatcttgaatccttctgtcgtgggggtcagatcttctacttcttataaagagcacttcggc  
ctgtacaagttgtaacctccaccctttttatcttctgtgacgtacctcatcgttccactaacaataaattctataggatgatcactggcat  
tttagaaaggtggtatgtactgttcaacattagatccttctgtaatactcatataatctgattattactggtctataaataccttctcaaaacctt  
ccgtatgattcaaatattctgcttccatccaactaacagatatcaaccaggcagttctagtcgagaaagagcgaatcctaagattgtcctattct  
gatcgcacccgtcaattgcaatccggaagattacaataaaaaacttctaggctatgtgtttatgctccgctatatctggcaggccaattat  
aacatataaataactttgttcacaggtacattttgctactttagcagatgttttaagcattactaacgtcaatttttagaccaaataccaaataga  
gtcaccattaaaatatagaaactttactacggacttcgcttctgtcgttatgctaattggaatttacttcatttttgtatgttaccgcat  
ctaaagaaaaagttcatgcttataacccttttagagctcctcaatggcaagctttgttactattttgacttggtaaagctcctcattccctgga  
gattgttctggtggtctttgatggatgatattgaacccccgaaaacattatcgggtgatgtgcaataactactctgctattgattttggagag  
cctggcatcgtattataacagatggctgattctctatctatccctatcggaggaaaaaataccaatctgaattcttttctatttttacctt  
tgttcttattggcacgatgttagttgggagctgtttttgggatggcttatcgtactgtttattttaccgaacggctatgtcgtatgcctcttca  
aatttggctggacaaggcatcctcaatacagttgcttggcattggtggtccctgaatcttactcatggttatctgtaattgataggattcg  
ttatggacatacatggaattaaggacatgttgttagattgtttggtacattccaaggtacgataatctcgtttgtttattcataatctaagccttt

agggattatnttagcatcgtagcaatccttagttctttcagcctcacaatgatgattgaaattcgtaaaaacgaagaagagaacggactcgat  
ctacctgctaaaactcattaattattacaggaatntttatacaaacatattgaccccgatttagccgttgatttctgtattctatgggggagcattt  
cgactntttctttctttatcaactgcagntttacagtcgagttactctgatgcattgcagatcgtgtattatcataattataacttagctaaatctag  
tttaaaggctcttgatctacattatgacgatgattaacnttttaattgcatgnttcaaaaaactgagcctattgtntttctttattactatgt  
ataatataatattatgcgtagatctcactattgggagtggtataagcagtgtaaatatacaacagagctatcaataaccaccgtgagactggtag  
attagttggctgtagatgaacttctattgatgatttctaaagttatgaatagtagattggtaagggttcttctcactgaactgcaataataacc  
tttgacagaccacaatgatgcgaaatttagaaagtacaagacgcatcgaatgtatcgcgctntttcaaaccgtggaacaatggcctga  
ctatatcatactgacgaagctcataaggtactntttgacattgaagattctgtaactnttgattaggntttacaactgtactcgtcattcaa  
aaccattccctgtaacctgctcctccagatcttggctgaatgnttatctccagggcttccatctgggtgacataagaaggcttggagctatg  
attatgtattactatttggaaaaggatgtgcttgcggaggaactgactgtatggacgtatggcttacaccattctttctattcatctataaaaa  
caaaaaatgactataataatattatcgaaaacactatgtcacctgggacggtaactcgtcctgntttcaagctgtatttatcgctcctatca  
ggattggaagaagaaagcgcgaacattcacaagagaccctgtcctaataagatgatcttataaaaggnttggatgatgataaattgcatgggg  
tagcatttggctagctatattaagcttcttagccaaaggccgggtgattataacttacttgcactgtaattctcattctaaagaagggtcc  
actccaaagtaattcaaccagatccgagcctgtcactcgcgccctagcagctgcaattagtgataatgatgcctgttcaaagggttatatgg  
acgcatgttacactctttccattcgtatctcttttacaacgagtgaaatcttttgatttaaagcttttacacatgtctgttgcattctataatnta  
cgaatgatcttctgtaaatagaagatttatgctggctgatgggttggccaaagattcagagttatcgggtcctgatccagccgatgaaatgg  
atccatccatcatttggagaacatggctgttcttgaaggcattcgagacttcttctaaaaccagcataatntctatatacaaggcttctc  
gaactnttatacgttctgaccgaaaatctatttctcagttatagagagtcgaatnttaccttggnttccaagcctatcacactatcagatntt  
tacataaaaaaggattccaagcatttgcattgattcctcaattgactatggccgctctcattatgcatntaatgacctactnttatgaattctt  
gttaaagtataagagattacttaataaaagaaagcatttagcttccctggaaatgttccacttagcttgcgaaatcagcaacattnttta  
atggaatcgatgaagagtatttcttattntttctacatgattnttactaaaaaacaacctatccttgattacgcaggactcctctttagattg  
ttcatttctacttgctcactnttgggaataactntaaatggagntctntaaagattacagtaggcatcttcatcagaggaatgccactctaaagct  
atatanttcttgaacgtgcatacgcgaaatgagcagcttctgaaaggaagatcttatactcagaatccgtgagccttcttattnttggagc  
gaatatacctatatagagaagnttcatcatagtgnttctcatttctttacagcttntgaaagaggcattgatccaaaagtagaatatgattntta  
ggaattaccattgaaggactaagcaaaagctcggaaactntcaagagctagaagcttctgtcattnttacctccagaatgctnttaagctcaa  
atcatttggatcatttacttgaactgtatgatttcttactcataatataactaacctatataagctctgggatgagatagcgtaaatctta  
tctcgagaagagaaatccttagatattatggatcctcaagaaaattgcagaataaaaagatcgagctnttctccacctgcgttnttaag  
cacaaatggctaacaaaacttgcatttatcaaatnttctacgatacacttaggaagagtggaagtggacattatgtatcaactntact  
aacaaggtagcccaactccttattcctatgctnttntgataggcgttnttactattactgagctnttnttaggtgacagggcccgaagatt  
aagtgctctgataaattgntaaagctcactacggcctcaattacggnttntagagcttataactggaatnttntgctcaatctccgaatctgt  
ccaccgttactcctcggaaatgatacaaaaatataatcattgaaacgcagaggaatagcaagcttcacaatgctnttacttctccgaat  
aagttatcagctaattctacattctgaattatcagcaagaagacttntggcagnttcaaaagaaatgagaaatntgcttataaagtgg  
gctgacacgttnttagtgaagaacagctccttaattatagctnttcttgaactnttatgaagctntgctggatnttntcaacgagagacatgt  
aataaaggagaagaggatgtgtataaattgatttcttgggacattcaaatnttctgcaaatcactcaggnttggagcgaaccattggactgtga  
actgcaagtagttgatagccttctgcccctgtaaaaaatnttgaaccagattccgattccagctatcaagactcctnttgaactacttagnttatt  
gggattnttcaaccgagactntaatcctcaattatcattcagcagaaaatcgcgacaatataagaaatntcattatggctgnttatcaacaac  
gatcccataaattgctcgagatggctntaaagtaataaatggattntaccgaatagttacaggacctccaatntgnttataccgtcattcagnt  
nttntctcacttatagatgactnttcaaaaacaacgaagctgtatagagattntcccaatnttntacgtgaccgcacatacatggatgattca  
tattntaaactagaacattaagtagctatgattgacgctcattcagcactnttccatacacgccaagctccaaaaggtaaggaactagcggct  
nttntgggaatgtaattntctggcgtattnttctaatgatactcagctcgtcctntgatattagcaagcctnttctatgctgctnttntacaggatgct  
gtccgactnttnttctgnttnttgggattntaaatgntggntnttntgataaggnttntaaagntnttntaaatgacacggcctcactntaaagaag  
ctgccgctaaaggntnttntacggctnttagcatgaacctatggagtgnttgagatgctnttntacataatatacaactatntccagntatntc  
aatgntgatgggagntnttntctgntntntaaagcaggaatntcagagcgtataaataagcactntgactntcgtntnttntccagagagacagntntcc  
acgtacaacggcctnttagtcaaccatcaaaagntacgcaaatgaactnttagactgattntnttcatatnttntgctcagctntaaagaaacaaa  
taccggggctnttntcgaatatntaaatnttntcagagaaatcactcctnttaactnttntaaaggattnttactnttntcactntcgattnttnt  
tgatatacaagcatatcaataaattcagattcagcccaaaaaagagntnttntgatnttntgaaatcagntcactntcagctnttntccatgnt  
ggaaaaacacctgaaagccaagtaattntccgattntnttntcctntaaagaaactcgcacaggaagcgtcaacaatntcaaaaagcagcgtatca  
tagagcctgnttnttntcaagatnttntgaaaccggcctactntgagntctntntgnttagagctaattntccgaatntatcagattntcaaggac

gaggaaaaattaattggatggtcaactatgattataaacgcctttattacaccaattgttaaagcaaggacatttcctgaagcatttgctgagatg  
cacttggatttgggtgtattcagtcggtatttcttcttgcgaaatcttggagaaggaatttgggatattcaacgataataatattccggt  
ttgatacaagccaacttcgaaagctagctccggtcattcacgttgattatcaagattgactcgcttaagtatttaaccaagtcagacctc  
ggtatgactgcgctgttcacatcgcgagatgcccaattgggagttcgtcaaggaaatattatgcgaatcacatatttttgccttgccataagga  
cttcttttaccagcctccaccattatagatttaattaacgacttttaggctctgatcccgaaggagcttgaagaaagagcttttctaatcat  
tcgtgcttgcggtgaggagcatcaactcatctacttagtctctggccagtcgtaattagtgaaactcaaatgttttccaaaaattctgtatggc  
cgatgctactatcctcaaaagaaccttagtagatgcctgtaaacttttgatttttgcggcgttaaagccagaggaatcttcttgcatgagtgga  
tcttaatgatgagtccttagacgcagtttattggaattcaaggacgtctccaaaccttggtagcatttggtagcggagcgttaaagacagttc  
gtcagatctttgaaaagaacagattgaaagttcgaacattcttctccgtgactttaaaggactccttctcctgcttatcctacagatggaca  
attacgacaattttgaatgcaataccaattgatgtatagaggaaagtattcttaagtgaatcgatcttactggtttgaagaatctattatag  
agaattactccagcgttttctgtccaacaagtcttctgcctcatatctgcactaagtcttcttggcaccactacagaattacgtaagtga  
actggattactttatggcttcttctatcaactaacaactaatgcttcttataaaaatcattttcttaattgtctctttatattcaatattgctactg  
cttgtttgcttccaaaatccattaccgatatcgaaagcgtcgtctaaatggttttctggttagacagcttgttttggcaccttgaaaatata  
accaataaagggttcttgcgaacagccgttaattataattataataggaatcaacaacctggactactaagcaggatcggtttaaagcaag  
cagtttacaatggtataaagattgttaaaaacagaatagtaactaactatggaagcctaaagcaaaaaaagaacgtcttggctgctaaagc  
agcaaaaaatataaaggagagcgcggcctaagtctgaagcagcaggttctgtcaggcaagaagcccgtgaagatgtaaaggacgaaa  
actgaaagtagctagagaaagtaagctgataaaaggaaagaaagacatgatgctggcaaaaaagttaatacgaagacaatctcttct  
agctcgttaggcgacgcaatcgcaagcaagagagaatctacaggtgaatgtctacattgaaaatatttaccggagcttgagactgaaattg  
aagaaagcgagaaaaaacaatccaattataaaggatgctcaactaagaggacgaaagcatcaatgaggaacgatacggatgaatgaa  
attgacagattcaatcgattttagcatccttctgttcaatccgctaaaaactgttcaggaacacttgagcaactcgtacaaaaaag  
gaataagacaagcttcttctgctttgatactataatcgacttttttagattataatagactggaactggaaataaaaaattgaatgctgagat  
cattcagaagtaataatgggatttctgttaggtcattgtctatctgaaatataaggaacaaccggtttccacatctttgaaataagtagtgc  
tcttataatacttaattatataaactattgtgttctaaatgtattactttttattacatatatgttttttcaatacatacaaaaggaaataagtt  
atccacgaactacagagaaagctatgaagctgaaatctattaagcttataaacgtaaatgctgaactaccactaaagaatattatgaataa  
aaaaaaagaatgagaagaaaaactaaaaaaaggtaattccataatggtgtcagcagtaaacgataaaaagtttgaatcgtaagtgtcattc  
actgaaagtagctttagcttttaaaaaacgaaaaatgataaaaaatcgtaagcattaatcgggatgagaagagaatcattattgtcgc  
tgcacactcaagtaagccatggttttgaagcttcagcctcaatccgaaagaatcccaatacatcttgcgaatacttcgaggaactgcataaa  
aaaatcccaaaatccgttgcaaaaaaactggtgtgctttgggaaagaattctgacaacccatgacattcgaaaacgaaatcaagaactaa  
agcagatatacagggagagagaaagggcgcagcttgaactccagctctgtcagataatggggttttaaaaaatccaagttccaatcc  
tgagagacatcccaaaaaagaataggttgaattaatggcggacgaagcgttcaaaagaagccacataaaagtcattcgtcttccaaca  
tacctaaaaagattgtggaacgctgcaataacttaattgatttactccagaattggcttgcagattctcagaatgagcacgttctatg  
aggcactgacgaaaaagctatagcataagggtgaagcagctatcaaaagacataaacctcatttcttaattccttctcgtgatctagaaggctca  
tcgatggtgtaaatgaggatgctctcgaagccataaatcagcaattactcgagagtatgaggtgagcaaatccgaaaaataacatccggaa  
atgttattctacagcatattaccgtagagactcgcaggcattgccgtataaacacttctggtgaaagtattgcaattacgcacaggcataaa  
aacaatgatacagaatatacgacaggaatgtaggacagctcagatgaccgggttaatagataaatagcctcggcaataacaaaaagaagtgt  
tccaatgatggagagtttgaagtaagtctataaagaggagcctgagaatgattaaggcgattaactggttagaggattgttagcaaaagcaaaa  
acatcaacagatgctcgtataaaagccataatgcaaaagtgaactatacaatccaatagaactaagaataaaagcctcaaatcaagggc  
atataatcgacgagttcatttaaatacattgcatcgtataccgacgatttctatacggtaataaaaaaagcaaacgacctccgagagaaa  
acgaaaaaggataaaaataaaaagattgtgaaagtcttaagaagtgaactctcccagtgagtaatatgagtcgaaaccacagcaacgagta  
ttgaaaagacctcaacgtacaaaaacataaattacctgtccaatataatgggttttataaaaaatcaagttttctataatgtgactgaaacg  
cagcattcagctagctttcacaagaattggctcgttttaaggaggcatgtagacaaggctaagtactatacgcagtccttagatagatgaatag  
tcaaacagcgtactaccgaacattttagactagaaaaagtaattagagatgatttattatgaaaagatatacactgaaaatgacatgcc  
aaatacaatggattggaaaatgatgaaaaggaaagataaaggaaaagatagaaataaaaataaatcaatgctattctagtagtataagtgaa  
aatggttcagctacagccaatgtacgagagactgttctagctatgcgtaagaaagctgcaaaacaatccctccgaagcctcaaatcatgtaa  
aagagccataaggaaaggtcataacaagtagcccatatgaaggaatagctctctgttttttctgtttacctgcgcatggcgtgggtgaaatgc  
cgaataatctcagtcgaagccagttgaagaaaagccataaaaaagactactgttaccgttaataattattaagcaaggataaatgcgtgaat  
tgagagctctagcagttttagtaccagcagtggaaggtcacgaaagaattgagaaagctttaaataccatggccgtacagatcggttct  
ggtcagactaggcctaaccagaatagcgaaaaaaaagctgatccgttctgtatcctaaagtgtcttccagtatcgtttacttacatcgcgctcc

accagtataggaatatcaatgaacccaaatacactcattagaccaaagacaaataggcccaagagcaaaataataataagtatccattaac  
acagtcgagtcgatgaacaaaattcaggcccagatagtagagtttttaactacaatgcttttaaccaatcaaagcaacaatgaattatgc  
aagttttttacaacgaatagaataaaaagagctaaacaaaagaagtataatccgtctcttctgcaatagaataatgaatcaccagatgc  
ccataaaccaagcaaaacaacgctgaaaaacaagtagcaatatacttttagctttaaagcattcaataatttataaaatgaagaaaaacc  
ttcaattccgaattcaagaaaatctgagctattgggattaatgaggcaaggaagctgacttggaaagctctgtacctttgtcacgagtc  
gttcggccaccagaaacagaagaaccatcatagctcctttcatttgggaggtacgaatggcattaacaattgaacaacgctcttcgagcaat  
acgacgaagctctcgttcatgctaaagtagcttttgaccgtctcgctccgtagcaacaatattggaatacggccaacgtttcctttgtaaac  
gttcacgacgatgagaagtagtaacttcaagacttctctgactgctcttgcgaatagccttcttgacttcttgacaaactcaacacggga  
gtctcagctgctcaggagcagcaggttcttcaaaatattagcaaatcatcctcgttccaaatcttcaattcttctcagagtcagagttat  
gccttcccattcccgcatttcagcatcagaatcgtctaatgatcaaatcatcctcgttccaaatcttcaattcttctcagagtcagagttat  
tggcagactcttgacaaattgctttcttctgctctctggcacaactcaatctctgtatttttcttttcttctgctgctttgcaattttgtg  
gtgttgtaaattttaaggaatttgcctcccgaatgcacatcgtctgggacaggattactccagtaaatcgttgaatgaacagaattattgca  
ctttgtaggtttttcattgaaaataaaatcatagttgccagcttccatccgtatataaggttattgatggcttcaattggaggctctttg  
ttgaggtgaattcatacaagcaattacagcggctatttactattaaagattgtttgcatggaagaaaaagcatatactttgggtaggatttaa  
atgaaatctgcttggtagtaatttagacaaaacatcgaaggttcttataataacaagtagagatccaaaatcattaagaattctcc  
aaagggggcatacaggttttctcaggctcacttggtaaacgtgtagtcatagtaggacttgagtagccattgggatagtgggggagcatct  
attaatcaaggaatcgcaacaattcaaaactcaaatggcaccgagcttgcgggaatagtagcgagaaggttggccataaccagcata  
atatttacgccagccctcattctcatatctcggatgagcaagccatggaattatgggttggggcatctaaacttggagtcgttctgcaac  
acctatggggataagtaatggcggaggcagtgattttgatagggtagcagcaggataatggaatgttctctgggttcaaaaaatcatca  
aaggagcttttaataactcgtacaatggaactgtataccaacatgcaaggtaccaacaagaaggtttaggccacgataaaaggctttaa  
tacctcatattgtatattttgaaatgcatccagtgatattttatagtaggagcaagctgggcccagctgggttccgaaatggacaggatcg  
gaggtattattatagttgattcgtcttttaacaaaacaggggaagacgtcttacacaggattgggcatcagctcagattacggaattggaga  
ttttagcagcagcaacgtttctgctaaaggttgccttccgtagcgggttagttacaattctgtttttacgccatatacgggttggtaaaggt  
acacttgcagcaccagcaatgatggcgggaagcagtttgacgaaacaaaaatgttagagttcgggatctgcatctcaatcgtcgataaccgcttt  
gccttggaaatccaggttttggtaagaggagatcgttcttcaacccaaaagtcttttgcatttccataactcaaaaatagatcgaccagctgg  
gcagatatacctaacatcatagggccgacgcctcgatacaagccgggaatgccttcgtaatgaagatctttggattgagcctaacgctcttac  
tgctccaaagctgatgaccatttacggacattcgagccttccagcttcttacgagcttcaacaatccaaaggtgcaacaacgagcgcgca  
tgcaaacccagcagctcctctgctatagcgtccttcaagaatcatccagcataaagacgaatcaagaccttagcactcatataggagaaaa  
tcccacaattcaattccttttggaaatctttttttggattcttaagtgaataaacttgggtcttccaaactgtagaatccaccaggaagct  
ggtttttgattattagacttgctcataagagttggttagcgagcgaatgggatgattttgattttgtgatattcacattaacgatttcattcgtca  
ggattgttagtaataaataaccggatgaatgggtttgtttgtttgtgataaaaaatgtaagaaacagtaattaggaatcgattgatgattt  
cagtaagagaaacaactgtttctgcaaaaagcgagatactttgaaatcactgtagcaaacctgttaacagcctacaggagttttcaatc  
atatcctaaaacatggcgtgattttcattccatggaagaaatgggtctattggatgactttgtttgatcaacaagaaagccaagtcaaatc  
gtgtcgatgacaaggatgcaagcgaatgaaagagaatggaaccgtccaaatgaaatccatggacatatacgaagttcacaatatcgtat  
atgtccatgttctggattccccttttcatgttgcaaacagagtggtatcaagcttaaatgggttgtgcaagaaagtagttccctcgagctttg  
ataattattgactttgtatacataaaaaatcgatttcagatcatacttcatgtacatgggtttctttaccttaccattgttatatcatccatc  
cattccattatgcgtgcttggtaaaaaaaaaaaaaaaaaaaaaaggctttgaaaaaccgactttgaaaaacaggattcttgcg  
tcttgcgtcatggactttcttccctgctctttgatatttcttttctgtctgaaaaacgcagaaatactttgaaacacttctgtgatgcat  
aaatctggcaaaatgacagtgctcgcaattagtttcaacaacatcttccaattgattcctacattcacgaatcgaggtatcttatgtgaattggt  
ggaagttttgaaaccaatattacaacttcaatggcaagcgaagccatatacgacgagaaaacatccttgaagaagatgaaagcgaatgatt  
tatgtactgccagacgtgctgtgcaagcttgattcgttttccatcctccaggtcctcaattttcttctcagctgattccaatggctgtttcc  
tctcaaaagcttgaaaatgttactgctcctcctccgtagaaaatagagagttggctatggacgcttggcgattggagattgctctgctcaaat  
ggcattgcttggtagcttcatcatgctgcacacaaacttttccaaactgcccaagtttcaaaacaagatacttcttacttccaatgtggatcct  
ttatatccaccgattgctcctcaattaccactccgatgataagaagcgttgatgacaagcttcttaattggcttcttcttcttcttgaaccattt  
ttttgttccattgaaaccattttgtccttctgataggttctgatgatacacaaggattgctggacatgactgcatatcaagatgattccaatta  
ccgttccgttcaaaatgaatggatttcttaaaaatgattcttacttactaaaaactcaccgacgccagacttgcgaagtaattatgctacatgga  
tgagcaacaactcgagtaagttcatttttgcacagtaaaaagtaattataagaagaatcattctagatgtttcttattaattaatcgagctactt  
aggtcgtcttttccctgattactctgttagaatggacgactttttaccattcattctgtcctcatcaaacgaccgtttcattcttaccagattg

cgatagaaaactgacacaaatctagtaaaataaaatggaacaaattccagtttagctcaagatcaacataactgaaatgagtttctgtttgca  
ttctagaagagctgttcaggaaactcgagctcaaagatattaggactcaaataaggagcgtgtcgacgcaaaaaatgaaatgagcttttagatg  
aagatgatgtggatcagattccattaatcaagattggatgctttttcaagtctcttgataccttgaatgaagagcttgaacagtcagaatcc  
aagttggaaaagcaaaactgaagaactagagctctatggaattggatcattcacgtattcaagagctgaaaagcgttctctacgcaaaagtcca  
tgaccagattaatcttgactaaatctggttggaattattgcaagtgaagagaagctttctgcaatcttcacgacaaaaaaactgatttaatt  
ttattatatttcaaatcaattccaaaaactttcactaaaaatcagtttctgctacctccttcttctgctggacctggcttcaactacaaaatga  
acgaggactacaacattgaagcagatgccgaattaggacgaactacattggagatgacaatcttctaagcaaaatacacctatatcaaaact  
atgagcccagactgcatgctcgtcgttctatgcaagagacaactggacaattaaagactcttccacgtaactacaaaagatgctgtacaa  
cgatgtatacatactttaattcctacgacgaattcttggactatcgatgatagacctgatttatatggctttttggataacaacaactgtgtcc  
aagcattgtttttccaattccatcactgactatgtcgcctatctcacgggcttgatagacgcccttattccattggtaagctggctctgcagctt  
caatcatttacggatactgacattgctgcagccatacttgggggttctggttggacaagtgcaatccaaaactactgattgtgatgata  
tatggttacccaatcagctggcttctggttcttggactattgtcttctctgatatctacatcgtaaaatggatattgac  
atctgctggctgggtatctcattcttcttctgcccgaactgtatcctgtttgaacaggcggaacgtatttctgtaagcttccatagctgga  
attatcgtcctcatatttacttgcaataactctgcaactattttttaaataactggacgaattctgtcttcttcttaaaccttactttaatg  
ttaatgttgatgaaaattataacatagctctgctcaaaaatagtttggttgactgaattttattatccataaaacttagcttcaagatgtgt  
acatcattctctgagcagcatcaacaactgcttcaacaatcactcctaggagaatcttattacagatgaattaaaaatgatagctgtatc  
atactcattcattgaacccccctttgttttccctcatgggtactttccaataactactggaacattcaactcctcgttctttatctatcaagaa  
ctccagaaataataacatcctttatataaaacttggaggattattctcattgaacaaacatcttctgttgaattgtagcaacaaaagcagttgc  
acctgccatcattatattgatctcttagaagaaaaataagttaaagatattgctgagcaaatctttaaagggaaggaagggag  
agcaaaagggaaatacaaacgaagatattatcattagctcaaaaagtttacttccatcattaatcgttgatcaaacacatgtaacaaaatac  
aaatccgttaaattggttattagacaaatgagcaataaaagacaaaactgacttctatctcgttaatacaaacgctgccatgagattgca  
aatatcaaaagaataagacagagttacacattgacatcttagagcttctaatacaacaactaaaataattgttagcgaataattacaga  
ggaagtcaaacgtacattatcgttgagcaatagcaacggagcttcaaaaggatgccagctggcgtgcaaaatcttctattgtaatcaagttg  
atcggggctcaagccaattgatgctggagccatgggagcaggtgccctggaatccaatcgttattttgatagaattagtttaacggtagagctt  
gctgctgattcctagctgaaaagcagcctgtctgctgtaaaacaactgtatctcatcgcaagtttagagctatctgtaggataaataccaa  
aattgttactgtaactcctgacaaagcatgcttccatctcagagaacgtgattcaaatgtcaaaaatacagtcattttcataaagatcaca  
aagtttgatctcaagacatcgtgaagaggaatcgtttcactggcatctttccatatttatcccaaatcttaatgataaatagtctctagataa  
aatataacggcatcttgcgagaacttgatgtctgaaatgctagaaatgatttcagaaaaaagctcttcgagctctgatctcctgatcttgcgaa  
agctttgatgattatcaaaagagcggactgacgaagatcaaaaagtttaattacctttgctactactgtacattagatggttacaattgattg  
ggtgaaactcggcactgtaaatgacttctgctcagctcttccatgttatcaggcttaatgtccacaatattgaaagaatggtctgatagcccaagtt  
ccatagattgatgcaaggtcatctgctgaaatgtaggtctcagcatcagagttcacgctgatggagttgatgtgataggcatgggcattggaata  
cactctacgaggatagcagcaacaatcgtatcatgatggctgaggcgaggaagtttagctgcatggtagcgttaaagggttcagcaaaagggc  
gagggtagcaaaactcgtcagaaaggttttctgcaacaacctcaggtttttcataaagcttccataacttaactgctttgctgctggtgaaa  
gcaaaaaggtgctgattcgttcgacgacccaacgaatctgttgatttttctcaatttctagcgaacttaagtagtcaaatctggttcatgac  
ttgaaattccgtaaaaaactgtattcgaacctttttggaatgatttctgtaaaataactactcgtcccccttatcaccggtgcaagtaat  
ctcctgatgatcaaatctaccgctgaataatcagcttcaacaatgagttagctatgtgaaaactcatgcctttttgcttattccaattcata  
ccttctgtgatgtcctcaacatcacccttctgcgcaaaacatcaaccaagttagtaatccatcatctgcttcaattttacatactgggcaaatctc  
cattgatccgataaatcttctgattcgtccatcgtcttcacagcctggcttcttacttttctgctgacctgtccttccaattttctgctgtctc  
gagaattataatcacaattcaaaagggtatctctataccgttcttctgttttaatacaagatgtttataaagattcttaacttcaatggcaattct  
tcacctgggtcgaattccttgggtgactactaaagtaaaaatctcactccccctcacgggaagcctgaaagggttaagatgtcttggcag  
attgaaaaatgttctattctatttggtttaaatttttaaaggaatcagttgaagggtcatttgcctatatctggatggttccagaggtattgtgc  
taatgtgtttttcactacgaaggtaacaaaagccagttcacaaggaaagctgcaaaagggaaggtttgagaggatgacacacga  
gaatttttacttcttcttggtaggttccataagggtaccgagcttcttcaataggaaacgcttgctatacaagttctttacgaaccaagagaa  
gagattcaagctttttataaaatttttgttttacgatagttttctagacgttttgggtttttacatgacttgaattgaagccttggagattaat  
atctcagcccttttgacaatgggaatcaaatgtattatcatcaacagggtcaatatacacgaaaaagcttcttccaatcttctcattaa  
taacttttctgctctgaggaggatgaggtggatccacatgcttccgactgaattcgttagtattgtattcataagattctcggattcccaaatcac  
ttactgaggatcaggacaattgggacctgaggggcagaatcctgataagatcgttccatattttggtttctgacatgtttccacggcagacg  
ggacctaatgggcaaaaacccatgtgtaccaagcacataaccaacttgcttactaggatctaaatgaagatacagacattcttccattaga



gcaccatcccctctcgcgtaaaaatggcacgggtggcattttctttaaattatactcatgcagaaagtacattgctctcccttctacagagaccgc  
gaagcctatgatttattaatccaaaaccttagtgaaaaaaaaaactaccaatgcttgcacaccacgctgccatctggagcccgattcgcgg  
ccatgcagtgaatgaagctttcccgcttcgcaaaactcgaatttgggctaataatcatcaaatcgaatgttactgaggaaaaatcagctgc  
aatcgcttttcttaataataatccgctatttggctgactgggaaatcgctaacgacaggtcaggtctctcatgtctacctcgctcacaggtcctc  
acgaggaaaaatgacattccgttgaanaatctcaagatatttatgaaacgcatgtttatagttgtagaaaggagctcgctcccttctaccttagg  
tcttcatcaattcgtgttctcctctacagtctataccatgacattgaacagcttctgttaaaaaccaggaaaaataaaagaatgcagagaat  
atatgagaaattagcaatatttcggttctcctcctgcacttgaagacttctgctgggagcatttggttcctgaagatgaattgacttctagagac  
tattagaagttcattatgaataaatttagacgagccatctctattataatggaataaaataccgcagattgagttccctttttactacttctac  
tgaccttagacttggaaaccagttctttaaagagaattcatgcaaacattcgaagggtagttctcattctatccatctggaaaaatttctttttc  
tcttattacgtgaattttactacggttctcttctgtatccccagcttcaagaaaggacttcatatagaagagaaaggaacgtttagaattcga  
ttcattcagctattgaataatctatttaatttaataaagaactgttaaaatctctttgatcgggatcttgtttcaagaatctggcatttcatca  
agttagaacattcgtggaggtaatttcttctgactgaattttactggttgaattactcaattcgttcttctatcgaaacatgccaattcagc  
ttgattgcagcgtatggttcaactcctaaagcatttgggaaatcctcatgagacttttctgtctattcaagttgccggaacaaatggaaaaggaa  
gtattgcagctatataatacaacctgttacaagcagcctaaagactggctgatatactagtcgcactttttgagcctaggatgataccattcat  
atgaatggccgagccgaagtaagaatgtttgaaacctgttataagcgggtcatggagatcgataaacgcttggtagcaatgcgaccgaatt  
tgagctctgacagctactgcttgcgaatgctttgtcaagctgggtgacgggtggctgtgattgagacaggttaggaggtagattagacgctaca  
aatgtattgaatcaccttgttatctgtgatttctcgattggtaaagatcatgaagccttctcggaatacactggaagcgtcgcctcgagaga  
aaggaggaaatctccgcgagaacgtccctgtgtcattgatataactaataatctagtgctaaagagagcttgaaaaagttgctcaagaagttc  
acgctggacctgtttatttagcttcaagaggagacaaatcaggctcagacttggagtgcacaagccctctggggaaacgaatgattccag  
acttcttgaatggttctatcaaggtgctaatgttctgctggtgtatgctttggatgtgtaacggcttcttccattaatgattcctcatgcac  
agaacggaataaaaaacactatttggcctggaagattagatttctgagagattccgggtggtggaaaggtttgtttgtaggagccacaataca  
gatcggccatagaactggcaacttgtgaatctcaacgagaaaagaatgctaccaagtcagtcttggatggtagctttcacgaatagtaa  
agatgcaaaagtcatttttagattcactagttcatcaggggacacggctctatgttaccctttctccgtacatgggatgcttggattcaatcta  
tggattctaaagtattcaagaatatttcaagaacagattcgaacctatactgctgatccaaaaataaaaaagaatcattgtgtctgcag  
gaagtcaaaatcctttagtgtttgtggaagtcttttactcggcgacatgcaaaaatctcaatttggagtaatgcgatacgaatataa  
atacgaataacatttaattctcaaggagcatttcttcatgaagaaaatgattgctttctatagaggatttggtagatataataataa  
tatggtatatacagctataattttatgttctgtaaatggtgagggttcttttcaatagaaacattactttgattatacttattataatcctttt  
atctcagcttctgcatcaacaaatattatctaataatgattgcatcaaatcagtgttactaacgatccttgttattcagctcgtaaacat  
ttctaagggtgcaataacattatcagatcggtttaccacgctaattgaatgtgagtggtgtacgtggacgcaacaagcatttgcacaaatcc  
atcatcgaagaatgaccgagcagattagtcgacaacagtgatgttgaagtgaaatctgtgtatcacaagattagattgcaaacagctat  
aacgctacaagtcgaattgcaacagattgcacaaaagattgtcgattagaacagacgctgatgaacacaagtaagggaacactcaccag  
aggatgagcaaggctaattaaatcgactaggctggtaaatgagaccttaaaccttaataaagatcgcctgttttgcagattcacggcgt  
cttggctgagcagactgtagaaacagttatgcttgcgttacaacgaatcaagaaggagtaagtgaataggaaatgcttagatatttggcaaat  
actaacgcatgaaaagattcaaaaagcaatggatgccctgctgcaacaatacaaggagcttgaagcggagtttcaaagttcaaaaagaca  
caaaatcaagttgttcgacaataaaagaatcataaccctgcatgaaatctagttctgctgacgggttaactcagagaattgtatagag  
gtgatagagcgaagagaacatgaaatgattatgcaagtttctattacgaaattcaaaagacacaattgaaaggaatattatagttcttctgtg  
catcggaaaggattgcttgttgggtgactgaccgacctacatatactccgcatcagattcgtttctgtagggctgcgagcactggtctctgcagac  
gcttgcgattttatgctagcggcatgaacgtaattatctgatcccggtgaaatacggtagcagacgatgtttcagaaggactatcatctacgggt  
gaaaagctttatgcttgcataaagcaggtacatggatcttcatggaataaaagcagctagacacttctgatactgagacaccttggagctgag  
tcgtcgttctcattcataatttaagactacagtcggtgcttatttgaacgctgcagttcgttccgttgaatacgtagtttgaataggctttc  
cttcatcatatttaacatcaattgcttctccgaaagctgttacttcttttgtgaagaagcttttcaagaaaaataagggttctataatgggta  
ttatggattcagggaaggctccaagtatattggcgagcaaatgattgtgtacatagtcataatgctcagtaaccgcatctgtaagtttgtg  
gagcattaattaccaagaaaataagaatgcaatacaatgaaatctggctcaattcaactgtccctgtgataattctaccctactacgacga  
gttcgttagtgtttgaaatgctgacaatccttgttcttaattcatcaatgcatgcgagcgtctctagcgggtgacttttctctatagctgtcat  
attgggataaatacagaataactcttctgctgagcgaagacgctcaaaagctttcattagacaactgactttcaattcgtccattttgcttat  
tgtaataacatcaggactcattcaaggaatatttagataaagaaatgcttttggagaacaatgctgcaaacgctgccttttaattgtttac  
agaaactacatcctccaattgaaaattgaagagtaaacagaggacacaagcttaaaagaaacgtataaaaggccacttttctattcttctg  
acctcttcttctacctaactgctctatgaactcactcgttgggtgtagcatctcatagtaaaaacaagaggtataaggatagcttcgagattata

ataaatacttgcatattataatgatatttctttattgaccgttataaggcaataagctaccgcaatccaacgtaccattatctttactttgtccaaga  
aataacagaaggaagaaaggttagcatgagcacgaacagtgaggcggtatatttcgaggatttaggtatgtttgcaaggatgaaaattgaaattt  
gcttcatagctaacgatgatgaagagacgcagcagaatccggaaggaattacacgattctcaaagaccaagcagcttattacgcgaaaaag  
gaacaggaagagcgtatacagcattaaaaagttccctatgaggatgcgctgtgctgagctcttgcgtggattcggagaaccggtaacgtactt  
tgcggaaaatgcagcatcaagacgagaacgattgttgcaatggatgctacagcgttctatgagggccagggagatctctatgtctaccgttc  
aaggagacgaggaagatgaagacgaggagcatgaaacctattcggaaaggcagtcaggaattattagaagctagacgaaaaatggcgtgtac  
tctcttgagaaggtaagtacgcttggataaagaacgaaaagatttgaagttctgtgctcagaagtaattcttccgctcgtctgccggtgatc  
attatcgaaaagtagatgcatgggttcgcaagtggtgggagaaaggcctatgtctatcattcgttctgtcaagatggtgacacgcttgctactgg  
tagctggagtggaacagtgagggttgggataccaaagatctctcaggttcttatacagggccatactgacaaggctcgggattagactg  
gcaccctgactgtacaacatgggatgaaacctcagaaaaaattgcttggccacaggagcggccgataattcagttgtttgtggaacggaaaac  
aatctacaccagtttcacgattagatgggcatttggctcgtgtcctcagtagctttcatccaagcggtgattttggcttctagtcttttgatc  
aacatggcactgtgggatgttgcaacagagaccgagttactcatgcaggagggacatgcggaaggcatatttgcgttgctggcagcctgatg  
gatccttgctcagttcagtggaatggacgcattgggctgtatgggatgttcgatctggaagtcaatcatggttttagatgaacatacctgca  
tattgttccatggattggtcgccgaatggatatcaactggctacggctcagcagatgattctgttaaaatagggacctcgtaaaagtttgcgtt  
ctcagacaattccggccattcctcctcgtatctgatgttcgttatgtacagtcggataatgcgggtcttttctatccagtgatgatgggtgtg  
tgaaaattggaattcaactacaggagctctcataaaaaatttagtaggcatgaagaaaaggctagcagctggacggctatggcgacaagtt  
gttgcgtcgtgatttgatcgaaccatcaaaagttggcaccttgagatctctaaaacataagtatgtcggcaaaactgtatgtacatgttcgtt  
tattcactctttctgtcaggttaagcgttcttttcttttggaaatggaatggaatagatcattgttatgaattgtaatgtatagataaatgaa  
accgcttacttttctatgaagttagcaatcctactacaaagtcaatcaatcgtttacagatctgcgtacagacaatatcgaagaagcatcatt  
tggcattcatgaataattattatagatattaatttctcctaatgggtgtcaaaagtagaaagacaaaggcacttccaaccaaactgtgtttcaca  
acatatttcaacatgattcgattcgactagccttgaagcacaccgattcatagggttatattcgcaaaacttattgaaacgaataaaactttctc  
ttttaaggagattcataacaaaagaaagtaagttgttaattttctttatcttcttaactaagcaaacgaagcaacaaatgcaacaaaaa  
tcatatagcaatgaaaaagaaaccaataatgaaaaaaaaacaatcattaaatacaggagggggatgtgaacgcaaaccaatgacacaag  
gtaattgtgaattgccataatgctactttgtatccaattaacatcattggaggaaacagattcaaacgagcaacatttatacaaaaatcga  
gcaaatggtttatcaaaaatacaaaaaacttgaccgaagaaaataaaccaaaaactgaccagcagagaagcagcagattgtctactcatta  
gacttgacgatcagcaacacctaataaaaaacttaagcagcaccggcagcttgagcaggtttggcagcagcggcgatcatccaagctctg  
gagcgataattttaacagcgtcttaatggcgtctcagccaacatggagcagtgtagtttaacaggaggcaaaactcaattccttggcgattga  
gtgttttgattttggcagccttccaaggtcaatcccttgaccatggtagtaacataggaagaagaagcagatgactccaacaaaagtc  
ttgaatttgacatcctcaatgacaccgtccttggcaccacgaattgcaagacgcatcacatcaccacaagcaggagcaccactagaccgacacc  
gacgtcagcatcattctggggaggttccaacattccttgattgtgtagtgatccaagcgttcttgggtacaagcagcagggagaagagaa  
ggaggaaggggcaagatatttagggcaccattcatgttagcaagacggagaccagacaaggagctggcaacgccaaggccagcaaacgct  
gagttataaaggggaaacgcggccaacactttggacactgcgagaaaacattttataaaagatatggtgaatgtaagatggaatccaacag  
gaaaatcgtttgaattagagaattcggaaacaaacgatgataggtgcaaaatataaagttgtaaactgagttgttcaaaactatttctttcaa  
agaaaaatcaagtaatagatttcttattaatctgtctgtttggcaaaaggataaaaacagatcgctccctccaaaatttatcagatggctgtaccg  
atggcgttccatttcttattgatagggcgccacgtcatttggcgaaaagtgctgttcaatcagaactggtggcgggaaggaccagaagctcaa  
gaaaaaaaaggacaacatcagagcaaaaagactcactcctttctatcgccactgataaacaatttaaccaatccaacaagttacagcgtg  
tcattgaactttcgtatcaaatgaaagggtagacaagtgagtgagtgagtgtaagaatgagagtgagagtgagaggtatgaaggtccatcaa  
agttgttatggaccgttttgcgacctggcgttttgccttctgtaacctttagaaggtttcctaataaaatttgcactgctcaccgatctgatgatt  
tgatgacaacgcaaccgaaaactgtgactgccttttaaagctggcctagaaggagatacaaaagtagatgagtgagaggaaagggtagaagg  
gtagaaggttagaagggtagaagataaggttcatgagaaaatccagtaaatagccttgcactgctgtgacaaaattccaagtagaataatgg  
aatttagggctaaataaaaaagttaactcctgcagaattagatggtagatttattgttttaataatctatgacggatttcgtaatgctgccttg  
tattcttactctttagtttctgttctcagtgattgcggtaaagattggttttctgaggatgaggtgaggggtgaggggtcaggtttgaagggc  
cattggtcctgcatttgagagttgctgttccctatcgcgcttcttttcttttggtaaccgtgtacaatttctgatccaacccaggaaaggtc  
aacacgagaattataggatagcaaaaataagccaaatgactaagtcgctttccatggtattttaaattgtgatgcaaaaacaatattgtgtaa  
gcatatgaagaaaatacagcaagccgctaaaacctgtcttttattcacctttgtaattcttgactgatcttctcgtatgtatcacctgaatcatctt  
agtagggcgatctccacataaccctgggtgaagcatgttgattgtatttaaaaattgagatgttctttaggaggattcgtgtaaaagtcgga  
atggaaggaaggagatgaattcgacgtcagtcggaagggagatgatggataacattgaaatcagttactcccattcaaagtcaccacctctt  
tttttaatttttaagaatgagtcacacctgaagaggattttaggaaactgctcctcaactctgaaatccctcctcagatgaagaggaatataa

tagacgtcttggcaaagcctactaaagagatataacgattggagtcactcttaagaaacgggttttggttctttaacaataaattggatccctt  
tcatactttatcttatatggagatactcgggcgacgtctacgagagcgtgtataagggtttgcatacttgacaattattccttgcttaattcttggtc  
ttgcctgcttatttccattattggttacttgaaccaattgttatcgagtttgaagcggattcgattcctatgcaagattgtcaagaaaagggtgata  
cagcgaagaggtagctttaccagtttctcaagtttaaccaatcaagaatttttcttactgagatattataaaaattcctccctgtttaaatt  
gcttttccaaaatgatgcaaattctgtctgaaaaacgacgtcttattaacgatgacattacgaatgatctttcattgtttagaataagaaaa  
agatttcgctactcttgagaatgaatgatttaacaagactcaatcattacgaaatctgcagtttgcagctacttattaccttgatatactttagtga  
caatgggttttgaataaatctagtatatatggaaggtggaattacaagagtaagagagagagaaaaaattatgacggataactccttagtg  
catggatcatcgagtttaaacactctctttccgtttcatatgcaaatgttcttctcgcgcaaatgttcttctcatgaccaaggatagca  
tgagttctttcttagcatatgcttttatttccatttaggtatttataaaaaaggacatgcagacaatactagagaacctgggtcttttgcata  
cagaagaacgagctagacggtagctgtatgcttcttcttaatgattgatcgagtttcatgtcttccaacacttgcgtaaaattatacataa  
catgtttgttacttcttcaggctgattgaaaagcttttattgaaagctggcttcttgacaccatgttcttaactacagcctaataatgagctat  
ggaacagtctccgaactgagtgaaatctatttctgtagaagagaatgccgatatccctactactgaattcccgtaatattgttcccctcgtagt  
atctttcatttgttcaacagtggctctacactatgtacacgaggtgataggtgctgttcttaatgctgcacttcataaaaatttatgaaatcgtcaa  
aggttgagaaccgaaactgacattcgtaaaagctctgaccttgaacgaaggatagctataatctacgagaactcatgagaattttctgcttat  
tatttttaacagtaataataatattggaagctatcatgtatgaatgaatctttcccctaccggttttatataattgagaagaatacataaac  
aaggaatcatatttacgcttactaatccgcagaatataatttcaaatgttcaagtttaataaaaaagaaagaaattgaaatgaaacc  
atattcagccataaaaaagaactaaacatgcctcattgaagctatatgcatctttgtattagtcttccagttttgaaatgggaatgcatgttc  
acctgaatattgttcaacatagggtagagtaacaatgaaagaaacctgaaacctcttagtagataaatacttttggttttccagccagttataaca  
aagcgggtctattccgacttgtaaacactgttgatctgattagaaggaagggttcatgaggtatagttgaaatattgtagaanaaaaaagaa  
atagaggaaactaaaaacaattaaatctcttttcatggtataaccgtccttctggtcagatggcttctttatacatgtttacttttcatctcgt  
tagttgagcctaataatgagtagtattgctgataaataatgaaagctcatgtcatgatttcaacctctactactcttagaatcttctgtttacat  
tatctaatgcctttgttttgcagtttcaataaagaagaagaatcaagctgactatgaggtaacgggtttttgcaagcaagtagcttttatgatt  
ccattagacatcatacagttgaaaaaaaaaaaaaaaaaaggaaattgaaatcatccatcggtttgtgagggttcaattgggaagggtatg  
ggctacgtagaataggactgtgccattgttactttaaacagagaggaaactatgataaaaatgggagaagagtatatatttcttcatatg  
aacatctatcttttcttcttcttaacgtatgcctttttttattttgttcttcttaagtttaataaacttatcgacttatactgcatc  
gaaaggtcctaattatggttctctaaatcatcttctttatcataaacatccttctcgtcgttcttctgataactgttcttctgatttccaccaata  
attatgtaagaatttctgaaagtaacaaatggaagagaaatacaaacactgaatttctaattgcaaaattcattacacaaagggtgatggatcttt  
gacgcaggtaaaaaagggttgaattaggatactcgtagcgaagaacaatgacattgattgaaaacagtctcagcaagcatttccgtgtttg  
ctattcttgggatggagaggaagattaacataccctaaaatcatgaccttgtttctattggaatttgaaacttttattacgtccacacagttgtt  
gaatttcttttcttaaatatggaatgaatctcaattgtctctctcttttttttatttcttatttctttttttccaatgaaacaaacaatccat  
tttccaccgaaacaatgctactgtgttctgtagtccgaagcaattccattcatagctctctgtgcataaaaaacaacaagtcttctgtaac  
gtgtctgtttctgttttattaaattcaatttcttagaaaaggaagtagaacgttcttaactactcgcagcagtagaaaggttgaatttcata  
cacctgtatcgaaaaattatttctccagcaactcgtttagatttgaattctacgattcttatttttactaaacaaaacaggcaagtagcatga  
tttgacacaaggaaaagattcagttgaggctctatttcaacgtgctactgagcttctcaacatcgacagcagctttagatcggcctggctggcgg  
accaggatcaggaaaaaaacgctgacttcaaacagtagtaagggaatggaacgagcggctcggatctgatattggtgaaaatgattccatggtat  
atgagaatacgttttctggaatgaaatcaataactaacaagtttctgtaggaggggttcttaccacctggaagaactagataaaatggacaatc  
cggagaagcagagcagcagcagctggagcagagtgacccttgacgcacgactttagcgtcttctgttgccttagtaaaaaagttacggactgc  
gagctgtttgccttctttaaaccattcggctcggcgtcccgtccaggacgatattcgtatccatccagaacatcgaattctcatctttaggggaaa  
ctatctcttcaacaagcatccatggctcactgggtgcaaacctatacगतatcaaggcttttcttccgtcगतcacaacaccgctagaaaaag  
agtgttaacgacatttgaagcgggactctgcaaacggaagcagagtcggctgcagctaccgattccaatgacatggtgaaatcttactttat  
tcaacgaaatctttggaactgattttactttacatcaagtagatttatagttcttcttattccctagttattttatgattcttttttgcatttccgct  
ttcctgttcaaacactttgctaaatgctgaacctggactatatgggtttaaagaagaattcaaccaagatttttttatcttcttcttcaatct  
aacctatcttccctaacattcttaaacctgtccctaaactcaagtaagctacgatgcctattctagttgattctatgaaactgattttccgtc  
ttcgttggaccataaataacatcttatagctcatctcaaacctgctctattcaaatcaaatgatttctaataatgtaattcttttttttttttt  
ttttttgaaacccaacatgaaactctcaacttctggttactggctctgttattgaaatgaaaagcacaggtacatacatcaacttattgt  
tcgatttgtgtaacgtttaccctttattttcagctcgggtttccagggtttgaggaacactccagccaacgaattgcttctgcatggtatcc  
cctcaacttactctccagctaagttagtcttcaacaagaaggcattttctcaagattgaaaacgtaattcctcggctcatcatagcaacc  
aaacgagacctggggacttgaaaaaccgcttaattgataaagcaaggatcaacgacgccccaaataaggctttacgcaacatgaagttacc

acctttgacgttctatttatgtcgtctatctgagaaatccttttagctcaattttccatcgttatgtttacaccagtggtctttcatcactgtcgcttc  
gaggctcatctctaaagttacaagcggattttctcggtttctacgttccaatcgttgaccgacaatcccgtcaacgaacgaggctaactatctcaa  
tgccgtgctttctacttactgctttgtatggataacaagctgctatcgctatgcaatccttctccaaccaaacgcttctccaagtgtggcttgt  
ctcatttccggagcagatataaccacaaaatgttgtgtctcgtttgtaatcaacaaagaaactggacagagtagagctcatccgttcccctcctt  
ccctcccaccaatttgcttatataatatacacgatttccaatttcatttggtaaatctgtaaactctaataaaacagcttaagtacagtaag  
gtattcggagctgcatgccccacccttctcgtactaatacagcgaacagaagatcgacttgcaaatgcatgccgtttctccaccaacatcga  
tcgattgaggacgagaaattgagggtgaagcttgtttgaacacaacgatctcattctgacaattgcctaccgaaaaattgtttaagcagctaaat  
ttgttggtagtctgtgttggatgacaaccaaacggatgctaatacgtggttggcagacgaggattttccaagaacagcattctcgtctc  
aatccattcccattgcatggatcctattgcttcccattgcttgagacacattgccctggttctctgcttctcctatagaaaaacagcgggagc  
caatcacccgtgtccttcaagaagcatttcaagaacaaccgccaattataaccggaacaaatccaagattatcggcggtattgaattct  
tcaggcagatgcatgattcaatcgtctgtggctcctcctcagaacagctcaaaatgtctgtgagatttcttcatcgttctcctcagcactctac  
tcatgagggtgcaagaaggaatgataaaaacgggtcccttcttcttcttcccgtcagcacatcctttgtatcttcggaaccacatattgatgag  
atgcatcccatttagcttcttccggatgaaaaagaatgtagatgtttggcagaggcttctgctcagatgagcttctcattcttctcccag  
tgcataacgaccaacatcaagagtcgaaacattcattgccattgaccataaaaaaccaactaacatcagtaatgacaaaatttctctat  
catcgagctgtcccactcagcagcagatttcttcccattctcagactctttaaagacatccaaccgacctgacctgtcatccttaccaaaagt  
ccagctcatgttacttggagctgacgatagtaaatgaaaaacgcccactcaagttgattatcttcccattgattggaagagacggat  
atgggctagctggcgtgaaattacaaaacaaaaaacactcagagaatggctcgtctgtagaaaatgcttctggcgttctggattaataata  
atatcaccttctacaatctccccgaaactttaaactggttgaaagagtgcatgttacttggctctatggccgctgtccatgcttctatgctac  
gatccataattcacaatgttgaaagcaaaaacgctgcctaatactccaaccagaatgcaaatgatcatcccgattctgctagtaatacagtt  
cacaaaattcctaacaaaaagccaataacttaagcagcgtctcctcaagaagtttacttccaggtcgcgatattacacctgctcccagacatc  
tcgtttggacaactacctcgttatctcacaatgatacaccagtaaatcaaacatttttgccctccgacctctatattccgtcagctccttctt  
tcaacttcccgtcggattcatttataatgacaggggtcaacaatgtatcgtagtagattgaccatagtagtctgagaattccagtgtactgag  
gaaacgaatacgcggcatccaagataaaggttctgacaaaaatcagatgaaagctctagtgaaagtattatcagacagttctcgtatcagc  
acaacaaaatgcaggacggatcatagctgatttaccagactctacctgaaagcgtcagatgaaagatcaaatgaaatagcttgataataagaat  
atgggtgtagttatctcgtcaggatgtagaagtcgtttccagagctccagagattacggggaaaatgacttgaagaagatgaaatctatc  
gcgaagatcgtcattatggtggtttcaagattatgataacgttattatgatggtgatgattataattccgatgaagatacatttaccattgaa  
gatgtgaatgaatcagaggtgaacaatgtgatgattccagcaatgatgaatccaattcctagaatatgccaacgataaggatagttccgatga  
agataatttaagtgaagtcttccgacctgattctgtacctcaagtcatttccgtttctctgtacacctcccacagggctcaatgggaa  
gcagaagttattctcctatcagcaatctcctaataatgaaatcttctcgttctgctgagaaaggggtgctgatgggtcattgatataa  
acggcatggttctgaataaacacaaggctcatataaagctcataacagaagaactccttctcgttaacttatttctaacaacatcagtcgg  
ccgacctacgactgctgaaaatctcaaacggttcacttggccttctctgctcgtcctatctatggagctgaggaaaataaatcagatgaa  
tgatgtaacgcgagcagcaaacgacctggtaccaaggacaaaatgcacgcgtacaatcttctgatgctacagacggagaattcaaacagac  
gaatccggaagtttataatgcgaatcctactaattggttgggtgatattgcaaaaataattgaaatcctggaatgagtagattacaaaagcttat  
ttttcttgaatcctgttctactgatgaagtggtatcgtttgcaaatggaaacaactatgagagcaattgtgtacattcttgggttactgcaa  
acagaattgcaaaaatgtgtgtttatgataaaagacagaaaaattataaaatcctactagaacaatggctatttaacgattcattaattttt  
tttttcttcttcttcttcttcttcttcttcttcttcttcttcttcttcttcttcttcttcttcttcttcttcttcttcttcttcttcttctt  
attgtttgtattttatgatttttttcttctgtacagcgggtcacttatgatattatgtaagttaatctattttggcagatgaaacttaataaag  
aaaactaataatcatgattaataaaatagataatttgagcatttaattgtatatatacatatataatgtacgcaagttatagtagtttgagtg  
gtttaaaaacattaaagtaaatggataagtagattgaagctcgttaagtcgaatctaattgtatatactagtaacaaagaaaaacagaaaagaa  
agccatattacctcgaagcagtagcttgaattggtgtgaaaggttcttgaatgatgtataattacaagtaagagatacacacatgtg  
tcaaatattacaacggttattttgttttctccgttgaatctataagtaattgaaacaatcgttttagcagatataagtgcttactttacatattcgtt  
ttttttacatcctgctcattcgtcatggaacaaatctacatacatgggcattgggtaggaaatgatagaagcgggattaaaaaggttttatggaatt  
ttgagcatccaagtatatagcttaggtatattgaaggaaatgtatccagttatccgattgatcattttgtaaaaaagtccttgaactcattcca  
tggaaatagtttagtgtaacaacaagcatattcaaatccacaaaattcacgccttagcttgggtttcaacgtttatgaatcctttattttgc  
ttttattttattttatattttgttttgaataaaactaaaagttggttgaatttaacaatgtactagtgaaatatacgttaaacagttttatgcggt  
tactgtggtatgactccaatagaaggtgagatgggactgttttttatataaaatcgtgaatgccaccattataattgtgtcttttcccact  
acattttgggaaaacacgggttttataatgaaagttatttatattcagaaatggatgttactggagacgtttgtatcagcaaacatgacagtg  
ctttgatgactcattttttacaaaactagatttctgattgttaacgtgatctaaaattctttaaactgagtagctgtgctatgtgagctgaacaagatc

cttttttttttattaaccaattatgctaaccctgtatcagtaaaatggcgataaatgctttttcaattgcagaaatgcaggattatgtatgtaa  
tgactatactgctttcattactagagggatagaggaaaaaacattggaattaccggcctagggtagcttgcacacctcctcgctgaagaaa  
aatgtgtctgcattttttactgatccttctttgtcgaatagctctgactttgacttcttagagcaaaactaatacattatagttggtgtcaga  
aatggatcccatgagtgaaagtattcgttcccatgagtgaaagtatccgttgagcttgcatagttacaaggtaaatattagacgctgtgaagcaga  
caaaaaatccgaggaggaactatagatgacgagctgaatcttctgatgaaaaagactcttaattccattcatgctaactgagggacactgct  
ttacgctgactttcgttttaatttattctaactttgttagcatgaaaaaggtatgaaatccgtaaggagatgctgtagttattatcataga  
ggatgaatactatagacaagacaagcatatgtctgatgccattggctttgaagacatactatacgtctgaaaatgaaaaataactgcttttct  
gtcccttcttttctttgttagctcatctctaactttgttagctcggataattacctgttcgatgttcgatggaaaaacacatatgttgctgttt  
tccatgctgaattggtatgttttctgctcgaagacaaaagtgctggctttgtggaataccatgatgcttactttaataacacgacggctgctg  
gtagtcacatcagtgacgataatagcctgtgacaaggcgttattactgattttcctaataactactgctttgtctttgaaacctttagcttttag  
ctaaccagtataatttagtagggaaatgatttaagaataaaatacagtgctttgacaaaactttaagctgctgactgtataagtcgtagtctgtga  
gtactgttaataattatagatgacataaaatgtagaagagcatgaatgggttagctaaagagatttattgtcattaatgggaagggaatcaatt  
atcagtagagttttccaatgtataagattacggtgagtagagtgctgattctcaggactatcgtaaagtttagtattagtaataacgatccacgta  
aagaaaatcaacaactacggtattttcaaagtcacagtcattgataaagtcagggtttgttcaaagctccatgaggatttagagcacca  
tcggcgataactaaagatcgtttctgtagtgatcaagacttaactgagcaagctgttgatcagaaatctaacattgaaattaatcttgaatg  
tagcctaaataaaacaaagcaacgaagatgaaagccttcaaattaaaacagggactattcaggcacaacactataggattgacttacagctg  
aagcatatctcgcaaaatgatagtaagttgtacaatgtctctcagaagtaactttaggactgcttttaagcattgctgacaactgaaga  
aaaggagcaggcatatgaactgacaaacgaacttaaccaatcgtgttagtgtaaaaaaatatagttaaaactgagggagaaggcctg  
gaaaaccttcccttctccaaggacatacttaacagcaaggacttcagcaagccagaaggtaactcaactttgaaacctgcaggaacctatct  
aattagcttagaattacaaaattatattgaaattttacctcctcgccctcatgctctaatacccggaaatagagacattgcaggtacagggaaactttt  
ggtttcagacagaataccatcaatgtcatagtaatcctttctgtctatcttctttaaagcgaatcctccaatcaatcaaatacatacacia  
aaacaaagagatggctttgttaactaaggacgaaaaaaaagcggttatcaagaaaaggactatgttctataaaaaataaccaaata  
acacaaaggatataatcgcagtttaagcaagatctatgaaatagatacacaacttaattgtatgaactgaatctaccaaatattcgttctg  
aggagtaggagtagaataatgttgaacatccattgatgagaagtcagcgggtatgtcgtatcgagaaataaagagatcttttctggt  
ttaatttaatttaattttatattgtttctgagcttaaaaaatccattaatctatgcaggagctagttagttgtgatgcctgaagcatttcacacct  
tgagcacaagttgacaatggaaagaggagcactttgtcgtggaaagatataattagtggtgattaaagctgctgactttcaggaagcttata  
acagcagttacaagagaggtgatgcatgaaaacgaccaattggagttatcttcgcaaggaattctaagaatattttggatattaaacgactc  
gttatacaatgctgggtatgccataacataggtctttctgacctcctcagctggtggccattataagtaattctgctttttgttagcatttga  
gcagaaatgaaaaagaaagcttctgaaatgcatttactgatgaggatggtatagatggatagaatgggtgatttaggacgcaaggtattat  
caagcaagtatataatgggacaaaatcatccagtgtaagtacatgcccccttttagatattaacagaatgaagtcagatcggagactt  
caatagttgtctcactcaaccactctactttgcatcgtttaccatccattgcttctcgaagacacgaatgtgactttgaaggactttgaaaa  
gtccaaggactcagttgtcagttttatctacatgactaccaatgtctctcctcaactcctctacgatataaaactatcgtcaagcaagaat  
tacaatcttcttttcccatgtttgtttattacgtatgaaatcttatacgaatttctttaaagattcgctaaataaattcaaaggcaagtc  
aatattagggtaggttatgctagagcagtcacaccatacccaaaaaacctcgtggaaggaaatcttcaacacgaacaaccacaaaaatggta  
agtaacgtttcccgacgaatgaaatcgtaaataagaaacgaataactaacaattgctaggcaccgaagcttaaaaaggtcgaccctcacc  
ttttgctcagcctaaggctgaaagaccaccaagaaccttgtttgtgagccgtcctgcttctttggtattggacaagacatccaacctgaagcgt  
gacttgagccgtttgtgaagtgctgagtagtattcgcctcaacccgctgtaagattttgggcttgcgtttgaaggtcccccgacttgc  
gttcaaaaagacttggacaagaactgctaccaggtctcaagttacttaacaagtaaccgctgagaccgctgtcgaagaagcaacgtt  
tgcttactgaagccgaggctgtcgtaacggaaagtctgccatgatgtttcaagaagcctacaacgtcaagatgggttgaaccaggtgtt  
gtctcattgaaacaagaaggctaagttggtcctcatgccagcagtgctgaccctattgagctgttcttcttctgcttctgtgcaagaagatg  
ggtatcccctatccgttgaagaacaaggctcgtctcgttacgctgttcaaaaagtcgctgcttctggtgttactgaagtcgagga  
aagacaagaacgaactgctctgttctcctgctgtgaggtcaactcaatgccaagtagcgaacttccgctaaagtggtggtggtat  
gggtggcaagaccaagctaagcttcaagcgtgccaaggctgctgctgcttcaagttcgttcaagttcgtgcttacgatactaaatgcaaaa  
ctttgagttctttgggagataaaggatattgtctgaatggtagcttgagttgtgtgtagtaatttagtattatattattgaaagtaagac  
agtgagtagcagtggtgttcttcaagtgaaagttgtgagtagtgcaaaactggttcaagacgttgaatgattatcgtaaaaaatcttct  
gaatctcatccggtttgtggtactgttataagaatctgcattatagcaagttgaataatagtttctaccagattcatatatactctgaaaa  
gccgtttatgttctcagtcacatttctactgtaaaactcggattgcaaaaggaaccgccaatccagttactactgctttgaaatggtat  
ttgagtgaaaacttccatttagataaggctcgaagctgaaactttgtaaacaggttctcagtcacaacgagcttcttcaatctcctcctggtt

acagaaattcagagacattgagctaaaatccagaatTTTTGTGAGAGAACTTAGCGAAAGCAACTTTTATTATATATTCGTCCTTGTCCGGCAT  
ATTTGAACCTTTGGTGAAGTACATAGAAGTACCAAAAATCGATGTTGTATCTATAGTTGAGCATCCAGTACAGAAAAGGAAAAAGCAAAAA  
AAAGGGTATGACGATTCAAGTCTAATGAAAAAGAAGCTAACGGCGGTAGTCCATTGTGGATCATGCGACTCGGAAAGACAGTTAAACGAA  
ACTGGTAGAACTCGATAAGATAACTATTAGACATTAGATTTGAAGTCCCGAGAGAACTATGTAAGCATGTTGGGGGTTTTCGGTTTTCTA  
CCATTCTAGTGACGCGAGATTATGCCATTAGCATTCTGTCGATCTTTCTCCAGGAAAACGTTTGCAATTATCTGGACGAACTGTAAGTA  
GATGCAAGGAAAAACAAGTTACTTACAACGATAGCAAAATCTAGATACCGACATGTGTAGCCAGCCATCTTCTAAACCTGCTCGAGGTTCT  
GCAATGTGTGGATATTGGGGACTATATGCTTGTGAGAATTCGGTACGTGGTACTGTTGAAAACTGTGAACAATCCATAGTGAACCTGAT  
GTATGAAGGTTTACGCTGAGCTATTTGTCGTAGCGACAGTTCAAGAGACCATTGTCTCGATAATGAGTTCAGGAGAAAATTACTCGAAAGGAA  
CCTTTTTCTTACTATTGTACTACTGATATTATTTGCCGATTTTATTCTATTAGGCATACTGCTAATGGAAAAAAAACATGAGTTGACTTGAT  
GATTTCTGATGATTTGTAATGTGTTTTACAGAAGAAAACGAAATAATATAACGCTAAATAAGATTTACTTTGCAAGCATTATTTTTACTGTT  
CATACTGTGTGGCGTAGACTGTAAGAAGCATTGCATACAAGCCAAAACAAAATTCGATTGAGCTATGTAGAGAAAGTTCAATCCAAATTACT  
AATGAAAAAAGAAAAACAAAAGAAAAAAGGCTAAACCTGTGGTTGGTTCTTCTCATGTTGTACCAATACTTACATTGGTAGTACATCAA  
GTAGCCAACAAAACCTGCAAAAACCAAGGGGAAGAATTCGATAAGTAGCATTCTTATGCCGAAACCTAGTAAAAACAGTTCTAAAACCTC  
ACCTATAAGATGATTTTTGGATTGAGTACATTAGAGAAGAAACCGACGAAAAATGGAGATGCGAAAACTATAAAAAGACGAGAGGA  
ATTGACGCTAGAAGAAGCATTTTGGAAAAACCGATGATTTGAAAGTCAATTAGGAAACATAAAGATGTAGCCGATCAGGAAATGGACGAA  
GCGCTGGATTAAGTACGAACATCAGTTGGCGAAAAATGATCTGGAAAAATCGAGGATGACACCTTTCTGTTCGATACTGGCGAAAAATC  
CCTCAGAAAGTCAAAGATGACAAGGAAATGGAAATGGAAGTTGAGCCGGAAGAACAAGAAGTGAATGAGCCACTGTCGGGTTGGGAAG  
ACAGTGACGATGAGCGTAAACAGTTTCTTTCGAGGATAATACTAGACTGAGGAAGCTCCGACGATATGAAGGAGAAGCAGAACTCAACGGTCT  
ACAATATACCAAAGATTGAGACAGCAATTTGAAAGAATCTATGGTGTCCCTCAATGGGCTAGACCTGATGAAAAGTTGGCCGAGAGGATGAG  
GAGGAAAGCTCTTGTGTAAGACAACGTTCTTCCGACATCTACGTAATTTAATCTTCTGTCTTATGTAATAAGGATTCACGAGTCT  
ATGCTGGTACAATCGACATTAAGAGACTAAAGATGCAAACTTCAGGCACCTTCTCATAGTGGTATTCGCTGATTTCAATTCATCCCTTCTCC  
TCTTATTGACCTGTGTTTTGACCGAACCATCCGATTTATCAGTTAGATGGAAAGGTAATCCATTTGTAACCTCTTGATTGCTTCTTCCGC  
TTGCAACAGCTATTTCCATCCGATGGAAAGCATGTTGTCGCGGAGGTAGAAGAAAATACATGTATATTTGGGATCTAGAATCTACACGTGC  
GAAAAAATCAGTAGAATGTACGGACAAGAGGATTGCAACCAAGTATGGAAAGATCCATATGGACAACACAGGAAAGTATATTGCTTAGAA  
GGAAGAATGGTTATATAAATCTTTAAATCAACTACTGGCAATATGTTACTAGTTTCAAATGAAGGAACCATTTCTGATGTACGTTTACTTC  
GGATGGAAAGGGAATGCTGTATTGAGCTACGGCGCAGAGGTTGGCACTTCAATTTAGAAAGTAGGTCTGTGCAAGCGCTGGCATATTAGG  
ATGGTGTGCAACTACTGTTTTGCTGGATGGAAATGACAAGTACCTGCAATCGGCAGTAAGAGTGGTATCGTCAGTGTGTACGATCTGAAGAC  
GCCAGCGACGATGATGGCTATAAACAACATACCTTTAGAGAAATGTCATTTAGCATTAACTCGATGGCCTTTCAAAGGATAGTCAAGTTTA  
GCTATTAGCTCCAGAGGTAAGAAGGACACTCTCGATTGTTCCACGTTCTAGTTTCAGTGCATTCCGAAACTGGCTACTAACTCTACACCTCTGG  
ACGAGTAAGCTGTTAGGCTTTGGACGTGGTGGTGAATTATGCTGGGTAATGAAGCTGGAAGAGTTGGTTGTGGAACTTGCCATTACGAATA  
AGGCAAAAGAAAATGTCAACATAGAAGTTGTATGTAACATGGAAAATATAAGGGTTTTTTGGATTTAGTTAGTAATAAAGGATTTTATCA  
TTCAATGGAATGAATACTGTGGTTCAATACAATAAAAACGGGAAGAAAGTCACTATATTTATAACATGAGTAACTATAATACATACATAAGTAC  
AAATGCTATGGCTATTGAACACCATAGCCTTTCTAATCTTCAAGGGCAGTGTATCGAGAATCAAGTTTCAACCTCAGTCTTGCTTTTCAGG  
ATTGTAATAATGAACATAAAGAAATGATGATTGAACTGTGAAAGAAAACCTGGATTATCAAACCTCCATACCAACTAAATATCGGTCCATGAA  
GTTGTAACAGACAACCTATTACAAGCACGAAGGGCGTCTGGACGTTTCAATACTACGAAAGCGGTTCTCGAGTTCAACGGTATTCCCAAT  
CGAATTTGACGTATAGTCCATATCTACCAACAAAATCGTACATTTCTTCTGATGTGATTTAAACGCAAAATTTTCAAAAATAGGATGGAGCTAA  
CCTCAGAGTTAGTGTCTATGAGACATTTGAATGCAAATATGAAGAAAATTTTAAAAAAGCCGGTCCAAGCGATATCGAAGGAAATGAAG  
AAGAATGGGAATTTGAAAAGCTCTCATGTGAGACAATGTCTGAAGAGAGGTTGAGAAGAAATGGCAACATCTGATACAAAAGCACGTCTAAA  
AGTGGACGCTCAACTTTGACTTAATTTGGGCTTTCTATTCTGACTTATAAGAGAGCGAAAAGAAATGATGCGCCTCAGCTAAAATGTTTTAAA  
AGAAGCTTGTGGAAGTTCTTTCTTCTTACTTAGATTTTTATTTTCTCGTTTTACAATGCTAAGCTAGAGGAAAAGGGCATTGCAAAA  
ATTCAGTGTGGAGGAATGCTTCAAATCTGTCTATGGACTTTCCACAGAACAATTGGACCAATTGGACCATTGCTTATCTTTGGACTCAACTAA  
AAGGATTTGTAAGAAGATCGGTGTTCTGGCTGAGATGAACATGTTTGTGCAATTACAACAGAACACAATACTCTAAAATGCCTGTAGGCT  
GAAAAAAGCTCTGGTTTTAAGTAAAAATCATATTTCTAGTAGAATTTCTAGTGTCCGTTTGTAGTGAATGATGGACTGCTGATCCAA  
GAATGACTGGAAATACCTGAAAAGATGCTTGTATAAAGGATGCAGAAACCAATTTTACATGATAAATGAGTTGAATCTTTCCCTAAGGTA  
TTTCAATTTCCATTGACCAGTTCTTCTACTGCGAAAACCTTTTCTGTTTATTACATTTTACCATATGGTCTCAACAATAACATTCGCTTGT  
AGCTAAGGTATCAAGGAAGCTGATGTTTACTTTCAATTTGAGAAACCTGAAATGATGTACTTTTGTACCTACAAGTATCTTTACATTTGTTT  
TATGCTACCTATTTCAAAAATGTTCAAAACAGTTATAGCAGGAGATCTTCTCCTGTTAGACTCTATTACTTGTATTCTTTTCAATTTT  
TACATCCCTGTTCCATTTGTTTTCAGAAAATGATGTATAGTACATAAGGATTAATATGCCATACCAACATCGTCTCATATAATTTCTGTA

aaatcagtctcttttctaaactttcgagtgcaaaacaaaaataacgattcaaatgtagactggctcatcaaaccttggtaaaactatgaatggaa  
agagaattcttttctaaaggaaatgacttgacataagaatctgggtagaaccaattgtgtgattcttttcataggattaatagcgagtagct  
cactttaccttgctaccaagtaagccaagcccaaaaaactacgggaataaaataattcaacaagcatcatgcttctaccaagcttgcgata  
gtcaaacatctaatccatattttactaccgaaagataacgtaaacatctaaaagtgttctaccgtaaaacagcgatactcacggcaacgga  
ttcctaacaaaataaagaaaatgaattaataaaatcgttttataaactcctacaaaaccgctgtttacaaggaaattccatcttaactgaac  
caacaactgggtatattactaggattaacaacaatatcaaggctcttaaatcttcaaatcaaaatagaatttatcaattttctttactatttg  
ttctaccaatttcattgttttaattttgaggtgctttgactcctttctactgctgtttccttattacctacctaattttcttttcagcttaattgt  
ttcatgtatcatgctttctgaaagaaattgtctacaggtggctcaaaagtacataaacgacattgaggatataggagactacccttacgctc  
gctggagcccattttggaacgacacctcctgatcgtttacttagaagaacggctccacatatcaaaagaatctcagtcctttggaa  
actacatgtcttacgcatgtttgctgtaactgcaacaatttaaggctccttctctgatcactgactggcgttcattataccagagacttaaga  
aacgaagaacactcagtacaatgaggcatccgaaaaacttgaaacgcttacaaaagctcgagcagacgaagcaaaccaagcgaattgta  
cctctagaagagagccacggctccgctagaccgcaaacgactacgccaatgaataattgtgccccaaaagctcattaatgacgaaagcc  
agaaacgatttctaaagaaaactcttttacagcaccaccagttacaagtaactcgaatttccgaactcaaaccttctttacgcttttaggctc  
cttttccgatggataagcagcccagtaacgtaacatcgaatgtcttctaccattaaacctcctccgcttctaattcccttaagcccagcttaa  
ttctaataatctctatggcaacgttcatcgaattacaatctcgttcttattccgatttctccctttccctaaatctctagagtcaaaatcatt  
tgccgaagcgtcttaggcattataggttggtgaacttattaattcttctacttttgggtgtttcattaatctcgtcgtcttttcccttattt  
atagtgaattacagttacgttcccgttttattcacctttactatacatagcttaattttgggaggttatcgttcttaattgtgctgcgatctctgtt  
atgccggttattatttttcttttagttgtttcttagatgcttgggttacgatttcttagctaacgatgaagttctcatatagctgttcattaac  
tcccgaatattattcaataactatccctgtcttgcaaaaaccagtttatgtttttagtttttaattcatttcaaaataattgtgttattgttca  
acgtcaatttactgtaccttctgtcattgtgggtgttgagataggcagctacttctgtattgagcaatgggtccatcaaattagagaccatata  
attatcacattgcaaatgctcttacaagtcttccaagaaatcaacatcgtgagatacaagaattacaccaccttggaaatcgttcaacagccct  
gtcaatgcatccatcattccatccaatgggttaggttcatcaagaattaagatatgaggattctgaagaccaaaacaagcgaagcaac  
acgagattttgaccaccggaagagtaaccatcttccgaatgcaaaaggccagtaatgccgaaagcaccacagtgctacggctactcttctc  
tcttttctgggtaatttttctaaagaaactcaacgcattaaatcaattccaaggttcaacatgatgttgggcaaaaataagcaaccgtaga  
cgaggatgacgactaacaagaccagatgtaggtgtattgttcaataagtaacttaacatagtagacttacgtgaaccattgggtcctacaacg  
ccgattcgggaatccatctgcacatcaatgtcaacattcttaagaacagggcctcctggaacatattcaagaacacatcagtcattgtaaaata  
ggaggagaaattttctcaacgagagggaaactcaattcaacgtcggcatcgggttgaggttttcaaggacaggaagctttcaagttttgatac  
gactttgagcttcagaggacttggcagcattgtaacggaattatcaatgaagctttgaaaatgcttacggtattccatttgcctttcatactcacgc  
atgtgattttacaacgttcttgcgagtagcatagaactggctaagttacctctgtaatagtctaagcgtccgagtggtgatgaattatcggt  
agcaactcattcaagaagaacgatcatgggaaacaacaagtagatattctgtagctttggagatattcggacaaaaggcaatggaagga  
acgtcaagcatattgacggttctcctcaaaagtaagagatcaggttggcaaaaacaagcagagcagtgaaagacgcatacgaaccacct  
gaaaacgtttttagcatatgactgcatttccgggtgtaaaccaagaccagccaagatagtagcagcacgggtcttgcaccatcagcatccatt  
tctgcaagcttatttgaatgtccattaaatgaatgtcaagatcatcacgttcccgttcaaacgacggggaattgcttgatcagcctcttgatctct  
cctaattctccaattcacgttcaatgaccgacaagcgtccagtaatgctttcttgatccttcagtaaatactttcctcaaacatcagcatcaaggac  
agactgcaaacgtggagtatcatcaccagcatttctgttcgactgaaagattgtaatgtgagtaggaatagcaacctcacggcgagaaaga  
gcacgcagcaaggtagacttaacataaccgttacgaccgtaagaccataacgtcttctttagccaaggttaacgagggcggcctcaagatac  
ggagaccgcaaaagcaaggtcaatccatcacttaataatctttgtcttcttgattagatgatgacatgtcaagaggattaactgcatgta  
aaactcttctaagattttgtccggtgaatcaatctagaggattcgtattcagccttaatagtacgctttccatttggcgcgaatcttctctca  
gcttttctaacttctttatcaacacgagattctaccttgcctcttactgaaatcaagtcacctttcaccactaaacctatcggtgatgaa  
atctccgattgtttatccataagaattgttcttcaatcgaaccaattgtttgtttgtaattatcaagattatgttcagttcttgaatcgttcaa  
aagctcagctggatggcctgaacggcatcttctcgcaccggcatcaagcaataaatcgcgaatcagggttaataacatgctcagagactcgt  
ctacgtcttcaatgcatcatttgcataccagaacaataatttaacacatgagaatcaatcggaaacagctttttgaataactgtccattgtg  
atattggtagtagtgaagttcaccacgtatgtatgagtcgacttcaatgcttataaagtgactcagagaaaatttttaagatactgtttctac  
cttaaatggatgaattgagtaatttacagaagaaaaaaaagattctactcatgctgaaggtcacttgggtttgctctggtttttatataca  
aactgctcaataataatgggaagttatcgttaaaagttgattttgttaaaagttgatttcgagaaagtagaatttagcaaacctcatggag  
gatttttcaagctaaacgaaacgaaactgaactaagcttctcgccttatactatcacgggatcgtaagcgtcgaaggttaagatggaa  
agtagagccagtagcaaaaaatctcatttgttctaaatgaatccgcaattatggaaaatcagcatcatggaaatctcctcaaaataac  
aaagcctaaatagaagttgaatgagaagggaaagatgtatatacgaagaaagtaagagaaagactagaattttgacttctgtaggaataaa

aatcaatcatcgccttagaaaactgtaacaaaaaagtcaagcaagtaagcatctcaatgctcggcggcagaagggtcttcatctttgtatactga  
taaatagttagcgtataactctaaaaatggcaatacgaagccatacctttccataaagctaaagccttccaccttgctgagatgcttcttgatgg  
ttgaccatcactttaggaatccaaagcagaggaaaagtcgaggtcgtagttgggagcagtaggtcggcaggcattaccattccttgctt  
caacagcagcagcagcaggttagcttgggttgaagattctgtgaaaaagcattacagttaacgaaacaaagccatagaaaaaacaaggagt  
cttactcaaagcagagatgtaaatatgtgaagagaatctgttcaaacattgcgtagacatgaaaaacgtatccgaaacgcttcttaccgt  
agcgcgaggagcggcgttagcatagccgcgagaaaaacatttcttatcattaataaaattgtactaaatgagattcaaaactacaagaattgt  
gctcatagtcatcttgcgaaagatgtttagttgtaggttgcgctccatcatacactcggtttaactgctaagaaagggtagtaatgaggaagg  
tctgaaaaacaaaacaagttttgttttcgtaattagcagaataatgtttcatcctactttgtacaagtttagaaaaatcctcaatctctgattctgt  
acaacctgaaatgtcaattccaatgaaacaagacagatattattgtttcagtagaaaaccaagatcttcaatctatacgttaagcattttttgtt  
tctgataaatcatagagatggggtttccatacgaagaacatgaccaagaatcacaactatattattaacaaaaatgagtgactgtatttctag  
aattacttttaactataaccgctaaaaacgaaactttttatcgttatgggggttaacttgacgctctttgattcaaggctcatacatacaaaa  
acctttccagttcaattgagcttttctgtgcatcagaagcaaaccaaaaaatcaatttaccctttttgatcaaaaagtacagaacatacc  
accaatgacgtgttcttattttaagcattgacaattcgtttgtttgacttcttacttggtacatgaaagtaagcttatacaaatgtttggaa  
gaaggagatatacgcgaaaactcaaaaagagtaaagttgcaagaattgattaaagcacttcgcataagagaaatgtaattcctcgatata  
gaaaaatgagagccaaggaatggacgaaagaggcgtttcacagcgagaagagatatttttgtacaatagatttagcagtgtaattgaaaga  
ccaaaatccaagaaagagcaccacaaaaagcggcggaaaacgctaagcgaatgtggagtaactgattgaaatcaaaaagccttataaaa  
gtctcataaatagcaaaaatagcaagcagaacaaatgcatcccagccaaatgatagcgatacccgttccacaaagaacagaaccgctatctcc  
gtacaatatcgttagcactttgaaacgaagaagaggtggctcggaggctttacgaatgtattgcatattgtgaacatcttttctcgtaaaag  
agcatgtatttgagaataaagcctggaaatattcaaatggacacgcaaaccaatgaaattaaagatccagtaacacaaactgacaaaaagtaacg  
aatcgacgggtgttattttcaaaaggaatgcttgaagaatcatataaagtaaaagaaatagagcgtgagaacgttgtaaaccaaaaggaagc  
gttaaaccctatacaaacacgccaacctcgttgaatagcattttgaaagcaagatcgtatagttggaaattgatacgtttgttggcgaacct  
ttatagagtcaaaggaatccaatgacattacttactgcagatgatattacagctgatgaaaacgtactgagggaatgaattgggcagat  
ggtttatcttgcagtttcttcttaataatcttctgtaatcgttgcgaacaaaaatactcacttgaaaaatccggggatgagaaaagccaca  
gaattgtcaatctattataaatggctctgactctgggaaagatttttccacctttattttatctgtcacacaagttttgacggatcactcaccttt  
gtcttgttcttctcaagttgtcgaatttctcaaaatccagtaaaacttgcgttcaatagatcaattcaaaaactcaactatggaatcaaaagc  
caacgaaatcgaaaaacatcaagcgttttagacgaaaagaaaagattaaattgaaagtcgattttgatccaactagcagaaaagccttctc  
agtccatgcagataaattcttctcagttcgtatcgttaccatgttcatagtttaataaaacagtaattcgaagagaacaagccttcaat  
gacggtaataagccagtttcttaacctaaagcttcttctgttgcgaaatctggtgaaagatggccttgatacctctattgttaccacaaagga  
atccaaccctaccctatagcaaccacaaaaagcggcggcgtcactgtcacgacctaacaagaaactcagaaaatcgctctgcgcaaaag  
caccacaaagatgccttctgctcctcgaagcaatccaagacctacaaggtcctcgtcctcgtcctcgtcctcgtcctcgtcctcgtcctc  
aagcttgcgtggaataggtttgagaacaagcatgaaatctggcgtgttgccttactctcgaagatccgtcgtcgtcgtcgtcgtcgtcgtc  
ccttgacgagaaggatcctaagcgtttttgagggtatgctatcattcgcgttcttctgttgggtatcttgatgaaaccgctatgaagcttg  
attatgtcttggctcttgccttgaagacttttggagcgtcttgcgaaactcaagtttcaagcttgggttggccaagccatccaccagcctcgtg  
tcttgatctaccaactgacatccgttggtaagcaaatgtcaatgttccctcttctcgtcgtcgttggactccaaaagcacattgactttgcc  
ttacctctcttattggtgggtggccctgctcgtcgaagaaaagagcctcgcgctcaacaagaaggtggtggtgaaaggcgtgaaagaagct  
gaagaagagtaaacctcaagaaataaaatgatcaagtgaactattatagtaattagtttattccttgtgtaattttcttagttctgtagcaac  
aaataactagtaattgatgaaagtagtcggtttagtagatcatgatgaaaagcatgtaactagttctctcatgtcatgtaaatgaagacctc  
gtcactcatcaagtattggataatctattgtttacaacctgagtcattttcaaatcggacgagtttctttttatagaaaacttagatgtatt  
ttctatttttagtctagtttcaactcagtgaggctatttctgactgcttccatcgagattgacatattctgtttcaataataaaaatgtctt  
aactgtcctcgaatacaaaaatattcatccttaggtaaatcatcaagtaatcgatccgtttcaagacttggctatctcgttgaacgatcattt  
catagttaagatagggaaatcctcaattgccctcaaatatactttagcctgatacaggctcgttcttcaaaaagtaatttcgacgacagaaaga  
gttttgaattgaaatcgaagtaaaagtagcctctggatcaatgtttcatttgcctacttaagaattcaagggcacaatcgtcctctgtgattg  
gaatccgaaataggaagcttattatcattggccctatcaacgttttagttaacttagaattatcaagtcaacttggacgatgtggccgattt  
accatacattccgataggatgagattgacgacattgtgcttaatggactagaagatccgattggttcagtggttagattctcaagttttcc  
ttttttcttattcattaataattgctgtcctcgtcgtgacttctcatttccatgggttcttttctcctcagtagattcctcactctcgatgcggggcg  
ctcacatgctcctcatacgcctcttttaataactttgatttttctcaagaagctaaaaagttactgatcctcattgttaaaggcttaacccc  
gtttgtttaccaagcgttaattcattaacaaaggcttctcaattggctcctaacgtatccttgcatgcaagcaaaagatcatcagtatactaca  
aatcaagatttggaaaaactgaaccttataaagatgttcttgggacttttcaattgttatacctgccgattcataggttataacgaatgattga



ccaggccacctaattattgaagttagtttcttattctttcaggtacctaactagacttaccacggatatctagatacttttgccaatactctgtctcc  
ctttgatattggcattgaatccctttggcgctactcttcattgaggacttcgcatattagttgatttactttcagcgccatcgctctctggcgtgtgtt  
ctttaacttttgatcgatctttttcatcttttgatgtacgctttctcattcatggccacattattcccattaccataatttaacaaaaataa  
atataaaataaaacaaaaagccctctattaagtcatatgaaaagaagtataatctgtatagggactacgacaaatgaatctgtgtgtagtcac  
caaagttcaattatatttcaaacttaacgattgctactgatgatgatattgagcatattcttctactaaatagttgtttatgtaa  
ttcatcttagcttactctgcaatttgagagctttatgacattgcttaattctatttgtttgaagctataaatgaccataaaataatggat  
tttaaataagcttttgaaaaatccactgtgaacgtaactctctgtagtcagccataagctttgtatacagattgttgattcgaactcggtttaaca  
gcatttaaaaaacatgcaatagagccctagtagtcagttaaattccattgtacaacctaccattcacttcttttagcaagaacggacgtttatt  
atgagtaccgataatgagcagactctcctgaataaccttttaatcatcatattcaacatccctatattgatttagcataagaaccccagacatta  
cgcatagcagttaaaagtaatggcggagattaacacagaaactacacgcttcaaatgaactgtagcctcaagagactcctaatgctaaat  
tataaattagagaaaaacacaaaagaattatgttgagcgttaacaaaaacttgggaacgaagcaaatccagatctagatattaatta  
gacattctcggtaaaaatagttatacctaagttttatgatcaaggaatttctaaacctctgcagagctcaacagtagacgcatcgtaaaga  
gtttgaaaattcgtagaacagcaatacacgtagcaagacctgtatgcaagtaaaacctgtaaaacggaatcaaatgcttgccttatata  
acgttctttaaataactcggaggcttgaagtgataagtgcttccattgtggtattgaagttgacttagtaaaacctataagcgttagcttca  
gaaatgcaagatctttacctttgaagatagctcagaacgggtcgtcttcttgaactgtaataacaaaaatcatcaacgacacgt  
ataagtgatcctttctttctgtaaatagaaggtaatctcaatcaactctgcatataaaaatagcataaatatgatgatataacggaccct  
gagggatcccctgtgtttgacgataatatttgcaccaatcttctgtgagtaaaataccagatgtgaatatccataccttgacaatatttgcgata  
tgtcttcaaggatataaaagttcatcgaagttttgtccagtagtcaacgttatcaatgaaaagtgatctttcattctattcgtaaggaa  
gacactagccttcaaggagtaagatcaactgggagatattagtgatttttaaaaaaatctgaaaactacagtaactttgtgcttctgtt  
acatactgttgaccaactgacctgagacttatgaatcaaacgattttcgaatgacatactcaggatcttcaaatgaatcttctgttatacggct  
catcaaatctgttataattgtcatagcatccctttatcaatacgaacaaaatattttccgactgttgttagaatgttgattcaacaacgtt  
cttcttacttataccaagaatgtcttgaagttcctcttatagcaagttttcgaatacatttgcgtaagaaaatgggtcatttctctggac  
tcgtagttgactattgaattaatgcaacttcatatgatccttaccattgataatttaagcacagaagctaaaggctgtagcagctgtttgtac  
taataaatgttcaattccatggttatcaaaagtttctaaaattaattaatcaactgtaaaagtagaatctgtacttacccttagatgttta  
cgacggagattgttattaaccgaaatgaatcttttgggaattaaacgaatagttgctggaggaaagactagatccctaaataattcatgcttta  
cctaagttagataaatattccatcatgtagatagttacccttgcagcagcgaagtgctgtcttccagccttttaggaaagggttagataa  
agaagtccacacatctttctaaaataacaagtcgattttggattcaagtgattcagtcagtagaagaatgattgtagtaaggatactacaaa  
aggttgaaaaaccaatacatgaactcagagaagatctgcttctctttcataatcactaaggcatagctttttgagtcattctcctaaacgta  
tccaagaaatgctagtgatctaagaagtttagcatattgtataatccttagcacttactgggattttctgattaaaaatgaagcgttaactgttca  
aacctgttaactgcagaaaagtttttagttctaaagtaataaagtagtatactttttcccttactttgcataactaaatgaaaacatgagtagt  
accccaaacagcttttgaaaaactttaagataactgacctcaaaaaagcataaactgtgttacttttaagagtaagcaaccactttgagttt  
tctgatttcggcaggtgtgtattctagttcgttagcagatagaaaactcgtgaggcacctacagcattcttgggcaatagaatgaagat  
gtaacaatgatacctgccgaaggcttttagcaatgttacggatcaaggagctgttcaacaacgtttggaaatcaagctttcaaacgaaa  
gagacgaagccttatttcaagtttctcctgtaaacacactagggagcccaatgtatgaggaaacatccattgcaaccaacaacggtgttt  
cttcagttatcagccgaatataaaatcgatctcatgattagcaatcactcacaagagcttaattcaaccttttcaaatgtttgtgaaaaac  
ttataaaatattcgaatcttttatagttattttgtccaggattctcgatacggattttcttatgactgccattttgatgattcgaactatcatgtt  
cctttctttcagaatagttgagttattttgaatgcatatattggaactccagttactgtaaaatagttatggtttggcaaacatgaaaatagctt  
cccctgtacaataagtggtacatcgatcacaaccaattctagaatggttacaattgaattaagaaactagacataattacttacgtttgagca  
atacttccaattcttgacgttaaggtatgtattgaaccattggaacgtggaactaagtcctcgcattacaatgggtggcttga  
actttcatgattctatcaatcagttaatgaaattgcttcaactcgaatattgtggcttccagtgatcaagtcaaacgagaaatggaactgaagcc  
aatatgctcataaccgtactaaatccttctgcaaaagattattattgtatttctgattcattttgaaacatattgtgtgtaacatgtaaaactatt  
aatgttagtcggtctagatattatagacctttggaatctatacctctgactgagaactgaggagtataagaacaaacttaggaaaagaaa  
agtcatagaatccaactaatgctgattgaagaaactctatgaactctcaattccgtgtgatggaagcagatctaaattgctggataaagagttcc  
atggagattgagagttatataatccacatattgttcaaagtaaaagaaatcgtaaaatgcttcaaaaatactacaatctgctttttgaa  
gaaaaatcgtcaatcacatataatgttagagctatggttagcaaatgtcataccaataagaaacgttaaatccagtcgagatggattga  
agtattttatgatattttttgaagacctttacaactcagaatttcataatcaactgagaagtcattctttaaactctgtttcattaaaataata  
tgtattttgtaccgaaaataataggcggatgaccacaaaatttgaaagagttggagagtgataaaggggaaaaagggcggctgcag  
gaacttaccatgttaagcaagacatgagaaatagaaaaagaaatacaggggaggaacaatttatgtagaaaaactctgacaataaaaaat

agtaatattatccactttcaataagaaaacatagattatgtagacgagtgcaagtatcaaaaaaagtcgaggattgctccacttaaaacatg  
attctggcgatgggattcaacagactcaaggcagacgttggaggtaacagagatgctccatgacagaaagggattcatcaaccgaataaggttc  
atgggaatgacctgcaaggatttggtagaatcgtagatcgcttgttattgggatataagggcaagttggccttgcaagagcaacgtctagc  
gatggggttggataccgggctggctagaagttgctgcaaatatcgttccacgggtggaaggataagcttccagataaatattggtagaggatatt  
ataaaatagaaatcacacggcaagagattatggtttctgtattttgtatttggtaggaacggataaaacagacagattatctatgacgaaaaga  
acgtttaccgatgaattaggttggtagcagcatcaagttctgtagaaacgattgacaaaatctactgaaagctccgacttgctagtattctt  
gcgtagaagagtatgcaaatccgtgccagctggaatagacttccaggaacgagttcgtagctttttagtggtgcaaggttccaatgctttgga  
attaacattcatgacagatgacagaaattctttattagctctggtgtacccaagattgcaaagacgctcataactgtaaggactagaggatc  
gaccagcgttcgcaattatgcaatcccagcacaacgtagttggatgagagaaagcaaatatctcagcctgaagaagggaaatgcttctccag  
aaccagctgaacatccagtacgtaccggcgttctgtaactgacatttttggacgttgaataatataaagcttagtggttactttcgggtg  
aacaggacggggtggaaaaaaatgaaaagctttcttttccagagcacaacgcttccaacttctaaaagtgaattaggaatctca  
tacattttccctccgcttgggagaccaatccaaggttttgaatcgttgagatggttttcttaacttgctggttactctggttaattagctcgtc  
taggacaatgctaccattggacgattcctggccagggagagaagacttctattcatattatcgctgctttcgattctattgattgcgatccttttt  
ccattgctcgaaggttaccagaatttcttgatgttgggttattattttgttttaagggagaaaaagtagaaaatcgatggattccgcgggga  
gcagttggaatttcttcaacttgtatgtataatgcaactcggatattccaggtaaattcgaccttctaacaatcctgctcgaatgttgag  
cgaattcgctgcttctcaatttggagcattttatacgtcgtttttgtatcttttactgaaatgggcatctcgggtaatagactcttaactg  
acccaagatatccggttaacgatgtacaggaagtcgtaattacaatagggtagggttagaaggcataaagaagaagaatgcttgtattg  
aaaaagtgatcaattcctcctacgacaactacgacaaaggaggttatcgaaaagaaaactcttgttatacgataaagatggtttctttgaa  
agatcagatttttctttgagccatcaattcagctcttaaggtgaaattttgaaggttgggtgagatgtaggaattttaggttttggacgg  
ctataagagaatcgggattagaaaaagtttaaaaggaaaatgtctacgagcgttgagaaagcaatccctttagaatatgatttgggcaacatg  
tctgctttgatgtgacccgttagacgagacgaaattaagctctaaaaaagccaggaagaaagaatctctcgtatggctcgtgataa  
tactcagttgctgtaacaaaatgttggccttacctaaagaacgaactcaagacggcattttacttgccttgctgaatctaccactccttctc  
gagcgaagcatttggccaagcctaagccagaaacaaaatggcaacgcttctcgtataaagggattgacccaagaaacggaagaaaat  
tggtctttgatgaggtcctgggagaatgggttccaaatggggctataaaggcaaaaaaagaattggatactcaatggattgtgaagatgga  
gaaaaggaaaagaagatgactcaaaacaagtcagaataactcgaaacattaacgttctcgtcggtaaaataattttttggatac  
caactcaagggtttgcatttcagatttctattgtaattttcgtcgttaatttttaatatagattcgggtggtatataaacaaggatgtagatt  
gtattgcgttaaaattacatgatccatgtggaatgtcaggacatagaaaacaggcattcaagattggtggttctatgcttgacaatgggtact  
agcattccctcatacaagattagggaacgaaacgttctgtaacttttaattttctgtagcttatgcttttgcgaaaggatattcgactatcgt  
ccatcgtttgcatatataattgaaatcctgaaccattctacgcattttggcaacctatcatttgttatgttcatgcaattcatttgcacgagagt  
ttctaataaggggttctgattctctatataattataaactcagttaatattaacgattagcattagtggtgtagcggtaacatgaatgctcccaa  
gcatcgtcgggttcgactccggctgatgcaacaagagaataacttttgtatttctgatatgtattatccttgcattcattagtaaataa  
catagttgggtagaaatctagaattcgtaaaaatggggttttctgttttgtttataaaaatataattgtttcttcttctctataag  
ggctctattttgaaaggtgtcccttttttcaaaaaatagaccagacgatataatttcatggcgcttggcttaagcattaatgctttttgt  
gatttagtaattggtgaaacaaaaggatttttttcatcagtttactctcagacaacaaggagcatattctagcttgcacaatactgacc  
ttaggatgttctactgactttcgtcaaacgggatatagtttcttctattttctgttttattactattcctaaattcatactaataactaataat  
gaaattatactgtcaaggcaacgaactcattgtcagcttcttctgacccaattttacctatacgaagaatcactcctaataactcaatatcct  
cgtcttcttatacgtcgtccattcatagaaaatagaaagcattaactttttttagaaaaacaatcgttaatccgaaaaattacgtgtcta  
atgcatgtaactgtttcctaactctcagaaatgaaactatattaatatttggtagctgtattaccatgagcctccaaagatgtttcag  
agcgtgggaagcgaatcatgtcggatacttaccagttaccagtttcttctgtagcttggacgagacatttgcactcgacgagattcatatggtt  
tgggcagcaagatagcagactcagtcgttggcaggaatcagtgcaagacagaacctattttacgttctaagacaaacagaagatagttctg  
ctgttctttggaattccgcgattcagaacacgctatgttctgattgcatgttgcaagcggtactacgctgaacgattaaatggacatgttaa  
aaaaagcgaatgaaaaagggtttcaggtgtttcagaattatgccagcagcgacgttatttgaagcgaattagaaaagcatttgacgaa  
gaaattgctaactcgcgaagaggccaagcttctatgcaataaagccatcgtcgttaggatattcctaattggcttccaagcttcttctgt  
atacagtagatactgtctgatcaagatgatcgttaagatcgttgaataatggtcttctgtatgcttcttctgtattttacaagaatgtgata  
gcatggccaaaattgaaagcaaatctggaatttagacagcttctggtaaaacccatgcaacgcttctaaaatctctctgctcgaatcagc  
tatataaatcagccagcttaggaatgattcaagattatgttacttggagaggcgtgtcatcagtcagaatagccagccaaaggcgaatgaa  
atgaagcgtcagcagatgtagttgacgctttaaattgctgtaactgataaccaagaaatattgttctctacagatacttttcaaaaaa  
atttccaaggttaagttttgtatgttggactttgttagctaaaacttattagcttaaaacctcgataaatattttctactacctgagcatgaaaat

atcgtttcgtgatcgaaaattgttttctctacagccagctggctcttcgcacgtcaatatgagtgaggattaagcattctcgaatgcactac  
accatgatgcacactttgtcattctacgtacacttttgcaagaaacaccttctatgagaaagtggttccagtttcttagaactacagagat  
tgcaaaaggtgctattctatgcttggtagcaatgcaaaaagatgactgaaaccaatgcaaaagccattactattgtcgaaccctttgat  
attgccgatgttggattgactgtctacagcgttttcaaaaggcgcactctggttggcaatagaagctgatttgaattatttccattgcttagc  
aattgtttactagaagagcttccaactctctatcgttgacgctgctgagccgacgagtgcatcgtggcttttcaaaatcacaagcaacttctt  
tgctactgtaacgaaaagcttgacacctttgtgcttctgttctgctgtaaattcagcaatttgaaagccattgaggactgtaggaccagagcg  
ttaataattcgacaaaatcggttaagctctcctttaaacaacttttccattactatctccccttctttcacctttaaataatgttagatgcttct  
cttattatgtataacacctgcttttatttcaacttctcttcttcttcttcttcttcttcttcttcttcttcttcttcttcttcttcttctt  
aatcgattcctttattctttactttcgccgatgaaactctatacatatattagatgttttcttattctattctgttcttaattctctgagactact  
acatacttaacttaactcgtcttcttcttcttcttcttcttcttcttcttcttcttcttcttcttcttcttcttcttcttcttcttcttctt  
cacaataaaagtagttaaagagacacaagagtagttttattcgtaacctttagtagacaaatgaagtccatatactccatacagatcatccatc  
agcttttaagcttcttaaccctacatgaaatatttacttttaaacatagaaaattactctcttcaattctgatttttaataatgtaagtgcatt  
gcataagaaagcctatatggcctcaaaaagtagaaagaaatgtacaaaataaaaatcaaaaacggttttgatacctttataaatattttt  
cttttaaaaaagaccaactgcttttttccaatcactaaattttaattctgcttcttcttcttcttcttcttcttcttcttcttcttcttctt  
ttgcaaccacactcctcactcaccataaactaacagggaaatgtttcaagtgtagtttttcttataagagaaagaacaattataatg  
tttcttttataaaagaaagcgatgctaaaactcgtcggcggcgttagagtacgtttttttagcggctctcgggctcagcatgtctaaa  
gtgatgggatgggtcccgatgcggttagtgggataaatgactaataatacagacattcactcagcaggctgaacagactagcagcagacgc  
acgaatatcggctgtcagtagtaccttcttcttcttcttcttcttcttcttcttcttcttcttcttcttcttcttcttcttcttcttcttctt  
agaagaaggattgcatcacaacatgagtgcccaagacaagatgtgaaggattgatcatgctagtttgcgctggtttccaagtta  
ccgtgaggtttgtctgcttccatgacttgattacatcgctggcgcacttggtaggttaccataccgctgatgaagtaagcagatggc  
agtgaatacagatgagggatggcggatgatgaaggtaaatgtcaagcgtcctgtaaaacttctgacttctcctgctcctctatcttaata  
ttgaggctgctgctcactaacaacggtgctgctcctcctgaccttcttggtagtccgtggtcgtcatggcggtcctgattacatttcttctt  
gaccggttatgggatcctccagttggtgctgaggtcctgacggatgaacttcaatccttttcttcttcttcttcttcttcttcttcttctt  
attcgatgatgctgtgaattcaggatggaactcccgtactactgccaagctgccaaggatgctgcaacttcttcttcttcttcttcttcttctt  
tgattggatacccgcaagaagatgggattccaagttagaccgtttgaccattttgacagctcctcagatggtgtaagagattcaagtggtg  
cctgtaagaacagaaagattgtataccaacgcccctatcagcaagtaagtcaaatcgtggtttacagtccttagctttagggtaaccaagtc  
taaagctgatttcttctgtagcttctttttaaactgcttcttggaaataaaaagaaatagagagaatattctgtttactttttgaatt  
cccgacttctacatgttcttctgatacttcttatttgactaaatcttctccccctttcttcttcttcttcttcttcttcttcttcttcttctt  
gagctcaagctccttcttattggaagtaacttaagcatataactgggttcttaagtgtgaaaagcgtgctatcttcttcttcttcttcttctt  
gtcacgacgaactaaaatgccaatccttattatcaaatattgaattcattctatactgactgtgtaagatttattctatggatttaattgttctg  
gttcagaggccataataaaacacttaaaactcaagtctatttgaacagatagcgttagccagctcatgataatcgaaaccttttatttgtgat  
aaatacatcttactgtatagaacctagctcattgaaagggttgtgtaatccatttaattacattgacagattcatgaaaatcttcaatgctg  
gctgtattccagctactaagcttctgtataaaataaacgatttgtactttagttccgcaaaccagttctcagtaaaacttcttaccgagcatct  
caaaggttacgacatatcaggttacgaaaatacaaaaaataggacattaaatgtttttataagtttcttcttcttcttcttcttcttcttctt  
agttgttcaattgagcttctaccgtaattaggaaagacatatagagaaaagaaaccaaatagaaactgtgattggaaccgttgcggaggct  
cccgtcctgctttagcattgctaaagaaagaagctcagaacgattaagtgagtttctagccaacatgattgaatgggaaaaatacaaaa  
gctcttaccattgccaatgaagtgagaatggattgtcagcgtattgagtgaggattccgataagttactaaagtgacgagtttctgtcgaag  
gtcatagccctaccagctctatgttttagagaatggtactgtgcttacgaaaactacggaagcgttctatcagtaagaagctcataaaaaatg  
aagatgtatctgctcaggctcacgagaagccccatgctggtaccatgaaggaaagtcgtacatccagagcgcaaagaagtcacatccca  
ccaggtatgaaacagcagcactatgtttctcgggtgatttaggtcttctgctcggctcggcttttaacgccaactacctcgaagatccata  
gcagttctgaaagttccttgggatacggcctagacgcagttatccacagaacacttcttcttcttcttcttcttcttcttcttcttcttctt  
ctgctgtttgatactaaaacattcaatgactcaagatgtgtccatcttccgaaaaatgtgacttagatcaagatcctcaattcccgcagcccc  
ccagtgctgctgagattgagtagtatatgatggtcctttcttctggtcctcgaaccgatacttggaaatcatgctactgatacttcttggacggcat  
ctctggatcctcactggtcgtgctttaggggtaccgactcgatataatgctacaaggacgatcccaagacatttcatgttcaacaagatg  
cttcttctgctgagttgcaatgcaggatgaagatttagtccaggtctacgaaagagaacaaaaccatgaacttacttcttcttcttcttcttctt  
cacgccaacacttctgtcttcttcttcttcttcttcttcttcttcttcttcttcttcttcttcttcttcttcttcttcttcttcttcttctt  
atgcccaatcaataacttacaagaatcaagttttagcaattatcttcttcttcttcttcttcttcttcttcttcttcttcttcttcttcttctt  
gaattgatcattgaattattgaataacttctatgaaatgctactaagtaaaatatttataactgattccgctagaagacacagagactgaaa

agaaagtgctactatataaggtatattaagatataagttactggataggatattaatgtaatctatcaaggtcattgacattcatagttttct  
gcaatgttatataaaatgcgaatcaatataatacgaagccagaaaaatcataaaaaaagcaatgaatthaatcttcggactcaatgtgctttct  
cagcatagagtctgtgcttttctaagtaataagaaagtttctcaatctcattagtgaccagtagaaatgcaaatgcgcaacgaggggtga  
agcttcaagcgtccaacttctcaacgcgcttagcacgagaaataaaaagccttgatccttacaataatccactatgtctgcaaaatagactt  
gcttatcataaggaatagacttcttgtcaaatggaggaaatcacaggagattcaaggtcactagtagatcaaaaaactcgtttctggaagcg  
cggcatgaaagagagcgcatttacttctgtaaatcatttaacattgatccgcatcacgattgagaatagcaatggcttcgtaggaagcagtcgcc  
aaggcagcagggagagctgcactaaaaatgaaagccataaccagaaagacgttgatgctcaccataagggtagatccggcacaataaccacc  
accaccagccaagcttgttcaaagaaccgataatcatttcaacatcattagtagatacagaaaaatgctcggtaaatcctttaccggtacgacc  
gcaagttccgaaagaccaagattcatcaagattaagcgaactatacttcttttcaaagcaacaactttcgaaagatcaaccataatctccaag  
atthtcagatagccttctgtgatgataaatcgacgggtcaatggacgattatgacgctcaaatcatcttgaagttctttaagtacgctccaat  
ctttcatatcattgtgttgaagtaacgaatggtgagcagagattgaattcccttttgaatggcaagttacaagcttcatctacaaccaatag  
tcaccacgcttgagaaaagcgggaatgaccgatgaaatagctgaaacgactgagcatacacgatagctgcttcgacaccaatgaaagggca  
atatcttttcaagcggagatgtttatcttgaagccataaaaattgggtggtccaagctcctaaaccgctttcacgtactgtatcaacagcag  
catcgttaatgtattgtttcagccaaagcaaggaagtgaagagctaaagttgataataggacgaccatccataagttctgtagacaagtg  
gtgattggaggtagtaagagaatccagttcaatthttcattgaattcaagaagaacaaggggttcaggttccaatcgttaactagttca  
tttacctttttcagtgagctctacataattattatcaggtgaagctttgggtttctcaggacgtaataagcagcaagacaagcaaaagaaact  
caatgaatgttctcaaggatcgttttgataagaagattggatgtaggtctttaaagtgaagaccccggtaaaatcttagtaatthttccaaaa  
aagttaccggttgattgtaataagcataaacatcatccaggaaggataagttgaataactcattccaataggtcttttcttaaaaaagtttcta  
aattgacaaaaatctggcagtgacctttaaattcactactcttagttgatgctgctccttgggtgtttggtatgtgaaagctaggtgactacc  
gtgtaataagaatthttaccgattgctaccaggcaatthttgggaaaaatctactattatctcataatgtaaagttattgaaaaaacttgaaag  
agttttcatctacgcttctataaaataccaagaaactccaatgtaggtatctttctattgttagggatgagatttaattaaatataatgaaagag  
aaagtatttctataactgtaggtgctcatgtattatgaaagaacaaacatagttacaagtagaaatgagaattaacaatccggaacagggga  
gagagaacagaaggggaagatagtggtgcttctgactagaattcatcggcaaaaggtatgaatthtcagtaaaagaaggatcacgcggatcaaa  
ggtacatagcgaagaccgaagtagaaagtttaggtcctttcattgtcactctgtaaaggaaggattagaagagacagcttggttcaatthtt  
ctaactgatatggtaatagactgcggtggaataaaaaaagaagaagaaggaggtatgataaaactacttctaaacacgthttcaac  
tcttccatttctcagctgattggaattggcaacttcaatagttgctcgtccttctgcttagcactcaatthttcaatagccctggcctt  
ctagaatthcttgaatgtttgcaagaaatcgttaaggaacgtaaaagattccatagaggaccgtgaaacatccttcttcttgaataagcttt  
ttgtttgaaaactthtttcttcttctgtaaatcgtgcttctgctttcagccgttctgacaactctgtattcaatgtttccatgtccactgatactgt  
cttacttgatgatattcctcatccaacagatatttactttcttggatgactctagttttgttcaaggtctttcattgtcttccagggttctcctctc  
aggatcgaagctagtgctggatgcttcttcaatgaagataatctgtacgattccctataatagtttgataatcttgcgaaatgttaggatcact  
ttgatgagatttccgaccttttcaaacactgaaatcacgcttctgaattcatattctgtactgtactgactgcaaaaagtcaaaagctagctt  
cattatgggaactgagatthttcagatgatgattctttgaagaattctcaatgttttagaatccatatttctactctaatccaatccaaccaatctca  
aacgtaaacccaggattgctgagatgtttcttctcactgttttacctttcaaaaatgatcttttagtataattgtatggaaaaggttcaatgtgctgctga  
atcagtcacatgaaacatctatgaacagagcatgtggaagaccaaaaaagtatatggcgtaaagcaaaaaagaattagaatcagcg  
cataaaataaaacaaaaagagaagaaggagcctacagcaccggtccatgttctccaaccatagtaactacgaggccctcagacgc  
ttaactgcagtgatcggacgggaactgggttttgccttaggtatggcgtagacaattataacattaagtaaaactatgtatatgttagtaaggg  
aatgtataacttagtacagtaataaaatgataatgactaagaaaagaatthttctcaggattgaatccctthtaataatagacattatcaatata  
accactatagctgtggataaatctttcaatthttatccgatgcttaagctgttctattcgattgtatttcttacctttgaggtaagttttcattg  
cgtaaagtccaactgcccacatattatcgaagtaaggaataataataaattthtttcttttgcaaaataattcttgtataaaactggcatatgttt  
tcttactgtatttcatggtaacacattcgataatctacatttccatcgaaatccatcatttcagttgtcttctgtaataaccttttgaaacatcc  
aattgaaaagataatthttcattatgaaatcaaaaatggctggatacaattggtaaaagaattgcttacgtcttaactgtataccaatattgtggg  
ctgtccaatccgacaactthttgttttacgaaacataataatthtaaaaaaagaatttcttcttataatcttaattaagaagcatcaaatcct  
ctaaaaacaaggcattthtagactgaatthttataactatattgtttttgtttacgataatctttcaaaacccttaacaaaaaatgcaaacgt  
aaactaatcgattatcgtgttacgactcgttaaaaaataagacactgcaacgtatcggtaaatcattcgtttttgtaagcaatgattgtgcccc  
attgatcactaagcgtgactgctttttgtgctttacgaacacacatttctgattthaaacagtttctgcccaccaaccctttgaaactaattc  
aacaaaatggcacgtagaccgctcgttctaccgttacattaagaacaagccttaccctaatctcgttacaaccgtcggcttctgatccaag  
atcagaatctttagcttggctgtaagcgtgcccgtgtgacgagttccccctctgtattcacttggatccaacgagttggaacaaacttccga  
agctcttgaagcgcctgatttagttccaacaagtaacttggtaagatggctggtaaggacgccttccaccttctgtcctgcccacccttaccac

gttgctgatcaacaagatgcttcatgtgccggtgccgatagattgcaacaaggatgctgcatgcttcgtaagccaacgcttggtgcc  
gtgtcagaattggccaaatctgatctctatccgtaccaaggactccaaccgtgactgctattgaagccctccgcttgccaatacaagttccc  
tggacaacaaaagattattgttccaagaagtggtgcttctcaatacaaccgttctgaattcattgagaagcgtagccggtgaagtcaccc  
tgacggctgctacgccaagttttgaacaagcgtgtaacctgatgagaagttgaacacttccctgatgctagcttaacctgcttaagatagc  
gtagcgtacaacgataagcagctgtataaaattggtttaccaggagcttatatgttcagcaactatagacataatttaaacattgtttcgg  
ttaatactgaattgtagtttgcacactttgaaggctgaaccaaattggtggcagtcagattgaaacagaaaacatgcatgttatttaca  
atctaattgacataaattcgaagctgttgagatcctggcttatcccataaagccaataaagttaaataataaattctcatcagcatcttctcc  
tcatgaaatcgtctgcttaccgcatggtaaataatagctcctcatcaaatccaggttctgagatttctaatacttgggacccaaaatg  
aggagaagacacttctcttccattccgttctttctgataaagtaagattaaaaggaacatcaagatccgcgggagcttcaattctgcttct  
tctgagcgaacaaatggtgtaaaaactcgagagccccatttttaagtagcttcttaataaccgctccacttttcttcaaaaatcgagc  
taacaaacaatacattttcacaattagagcctaacagattaacaatgctgcaatctgtaattcttccgtcaaaggattcgggtgacttcgacttct  
agcatcgtgtccacatgagatgttgcattccagtaaaaggaacagtgcatgtgctagatagctcaaaaatgtttcaaacggggaggttaag  
atggataattcctcaagacagctcttggtaggagcgtgaagaaatgagtagatccaaagccaaaatggacccaaaaacatggaaaaac  
tagaaacagagttgtaagattggattgatggcatcaatgacaattaaatgctgatcttctggtttccaccattgtacaatctgcatacaactct  
tttaactcttcttatttcaactagtgcatagatgaattgatttccgaaagggcagttagcttcaagttcataagaacaaatagca  
ctttgatattctgtcgaaagcagttgtagcaatcttataccttgggaaaacttggcttctgaccttgaagcagctgactggatcataaaatga  
aggagaggcttagccgtttgttgatcatccttaagaactgcaatggagataattctcgtaaacatcgatcgagtaagaattggacatcttct  
agctgttctgtgaggagcgttataatccaacaaactgtcaaaacaaatcgaataaataaaaacaaataaagtataaacgcttaacggg  
acctgtactgttaccagtaaatagacacgttccctatgggtcttggagctctttgcaatttcaaaaaataacgaactgatacagacagtaat  
gaaatattgggagcattatgtatgtcacagtgtagacactcaaggaagtgatagggtagggctgactgtcgagctaaacgatatacaaaata  
ctaggagagtaaaggtaacccaacttttcaaacatggaaaacgagcgtggacaattggttgaccttaccgtccccgcaagtggtatgaata  
atitagaaagaaaattataattgagatgattagataactaacgtttaaataagctctgccactaacgtatcatcaagtaaggatcacgcttccgtt  
caacttaacgtttgcgtgtgacgctgaaggtcgcaaatccctggcgagaagaccacctaagcctatccggcttggcttccaagggtgaat  
ctgatgactgcatcaaccgtctcactctcaagacggctcgttgaaggtgctggtcttaccacgttaagagctttaaataatgcttcttacctagaa  
aaaggtcaaaaatgatgcttgaatttaagcacaattttcttctgtggtcctgtagtagctggtttaaataatgaatgaattcaagagtagtta  
taagtaataattgctgttcagtagtatgtatggatgaaaagcagctgaagagtgatagatattccatagattgaaacaagatgatgctat  
aggtgtgatcgacttgtataggaaattcattcaatgttgaattctttgagaagggcttcttcttctgcatatcgcttctgtagcaagtctttagt  
gcttgttccctcgctcaaacctgttcttattgatactgttatttattgcttcttattcaacttataaagacttctttagacactccatagggat  
gcttggctgatattgtataaacgaaggttatgtgagtaaggatgattctacaacaaactcagttgctgcaacctctcaattactggaaac  
gttgatggttttagcttctgaataaaagtaataattaattggaaaaaattcttcttctgagtaattcttacttcttctgctgaacgacttctg  
cctacataagaaaatcaacaaatgtcagaatccgtacaacccaatctctgagaagcaggttcttcttctttagcagcttctacatctaata  
ttcaaatgaattgttttgggaccagatggagctccgattccttgaagacaaggttcaatcaacagctctataaaaacgtgctcagctct  
gtaaacgaagacgatattatggctgtcgaaggaattatgaatcatggtgtagtaatgaaaagccatccttactcatacacctagcttctgga  
cctccaggctgctacaaaacatcttactgaaaatggcgaatttggtaacctcaagattagacgagctgctcaaatcggtatggcattcg  
tcgttacgacttctgctcatccttgggttatctgcccctctgcatgcaaatgcaaccaggattgcttctacccttcttactgctcag  
gaacaaaaggccattgggagcgtgaaacacctgaaatttgtgtccgctaaaccagatactggttctgtccgatcattgatccgaacaaac  
tgatcgtggcctccttatgcactgatgagaagttcgttaactctggatctcgcaagttgccccaaaatatacttggatgagctctctgctcac  
ccttaaacatgttgatgagaacggcaaccacagcattgtccccctctgagccttgggaaaatgaatataacgaaggttggatgacgtggaa  
cgtgctcagaaggtacttctcttcttatacttcaaacctttagcagaggatccagcgtctcatagtaacctcactgaatctgataactt  
atgtggcttgacggctgtaagagcgaaccaatgccagatattgatcctcactacaattgacgagaacagctcccttggcctcaacaggat  
tctatactaaagatgggaaggtacggctggcatgctttgacgtcgtcagtaattgaccataccaaacgaaaatgctcaccacacttctcgg  
acaagaggaaacatccaatgccgagctcaagaaggcaaccttcaactcaatctcttaccactactccaatactcccagtttcccggg  
aactgagcatcgctggttcttcaatggtcactgggatgctcaggaggaacaaagaaggaacagccgaaaaaggagaattttatacaatcaga  
tatcgttgattcctgactcgtgatgctatcgaagagaagcatgaagcggagagtaaatagagacgaatacaccggagctactccttggag  
agaagattgagtcggtcccttctcgatgggtgtgaaactcctgccaaacgaagcttctctgctcaacgacgtcccaacaagttaccgg  
atctcgggctggttctgctcagcattggaatccctctcaaaaaggccctttagtcgagcctatgccccaaaccgaagactccaaccgttc  
tgattccgaaacttctgaagtaactggagctagtgaaaacaaaatgatatactgagaaggatgctgaacgttctactactcctcagcttccct  
tctgatgacgcaaaacccgtgacgtggacctaccgctggcctcctactatggcagccactaagccagcctttctataagtgccatggacgt

gTTTTAGAGTTCCTCAGTCTAACTGCTAAACACTACGTAATAAGTTTAGCTTCAGCCATTGAATCTCCTGCAATATACCATTGAAGCTTTATTA  
AAGGTACATTCAAGTATTGCCATAATTTATTTGGTAAATGAGTCTAGCATACAGAAGTTGCTACTTCCCGTTATGTCAGCTATGAATATTCACAA  
TTCAACTATATGTTTACCTGCTTTTTTCTTTTTTCTTTTTCAGAAGATTTGATACCAGTACATGAGCCAAATGATTTCTTTTGAATTATAAGAAGTTT  
TGATCCTCTTTTTGAAGTTACGCTACTTAAATGAAATAAAGACAAGACATACTAATTTATTTTCCATTATGATGGTTATAAAGAAAGTAATCAG  
TTTGAAGCAGCTACTATTGTTAAGCGTGCAAGTCATGCTGGTACGAAAAGATCTTACTGTAAGTATATGCACTGTTGCGAGTGTGGGATTG  
GCAATGTAACATCTTTAAGCACTAATTAGCATAATATAAAGCAAAATTTGATCATTGTCTAAAAATGAATCATGTTGAAGAAATCGACA  
TATTGTAGACATGCCAATTCAGAAATACCCAAATCGTTCAGTTGTGGATAGTCGTTTCTATTTTAATTAAGCAATTATTACAGTTTTAGATT  
CTGAACTCCTATTCATTTCTTAACTTTGTTAAGACTCTTGATATATTGCAAAAAAATAAAAAAAAAAAAAAAAAAATGGCTGTCTGCATACGA  
ATGTTGAAGAAATGCAACTGCAAAATCTGTTGTAGACATTTGAAAGAAGATTTGAGAAAAATAAATCCTAAATCTACCCAACTTTTTCTTTG  
GCTTTCGTTTTCTGATTTATTGGAGAAGCAGGTTGTTAATCTGAACACTTCTGTTTCTATCTATAGCAGCTGTCTAGTTACATCGAATGCGAGTAA  
CTCAACTGAAAACCAGTCGGTTTTGCTAAAGTCTCCTGTTGAAGAGGATGACTTCGACGAGATTACAAAAATAAATCCGATCCAAAAGTCTATC  
GTACACAATACTACGGACAATACTACTCTGGAATATTGCAAGTTTATGTTTCAACATTACATTACAGATGCTCGGACCTTCCAGCTAGACGAAA  
ACGTTGGGTTTTGGCATTACCCATTAGAAAATCTCCAAATCCCAAACGAAAGTATATAGGAAATGTGGAATTTCAAAAAGACACTTTCA  
TCAGAAACAGCACATCTATCTTTGAAGTGAGCCCTGATTACTGGGGCCTGGTGTGCAACGGAAATGCGTTTCAAAAGCATTGGAATTTGCTTTC  
AGCAAGGCGCCGAAAAATGTGGTAGATCCTATGCAATGGAATGAAGCCAGCAAAAAGGTCGCTATTAAGCTTGGATTTGATGACTGGTCTG  
TCTGTTCTACATACGGGCTGCTTAAAGCATACTATGTTATCCAAAACCAAAGCCAAAAGAAAATAGCTGGATAAATAGTCAAGCTTCAA  
TTGACTCTTTTACTGCATCTTCAACACGAATCTTCTAAATTAACTGCATAATGCAAGGACTGAACACATAACTCCTTGTACTTCAATTTGTCAA  
TGCTAATCTCCCTTACTTTCATAGAATAACCAATGCTCTTAATAAAGATTTCTAAAAAATAATGTGTAATTTACATTTCACTTAGTATT  
ACTTCAATTTACAAATGTGTTGCTTATTAGACTAAGCACCTTACTAGTGGTATCTAACATAGAGTTCAGGACTTATTATATTGCAACGAATGCT  
ATGATTTTATTCTAAGACATCAATTAAGGATCTCTACGTTATGTTTATAAATCTTTCGAAAAGATTGTCATACTGTAGCCAAGAAGAGCGTCT  
GTTTCAAATATATACAAAAAGGAGAGACGCCGGTAAAAGATGCTTAGATGAACGAACGAGGTGAGAGATTTCAAGTGTGAAAAAGAT  
CCATTGACATGTATGTACTTACTTAGGAACCAACTCACGATCTTAATGGTGTCTGGTGTCTAATCTCAAATATGTAATATATAGATTA  
CCATAGAAAGATCGGGTCTTAGAGGAAAAAGCTCAGGAATACCTATTTAGAAAATGTTAGAAGTAAGAGATGAACAGCAAAAGGCA  
GTAGCGAAAAAAGCAAGACAAGCGTGTGTCATCAATGCAAGTGAACGAACTGGTACTTTAAAGATAGGATGCTACTTCTTACGAA  
CCATTGAAGATTGTAAGGAGCATAATGCTTCTCATGCAATGACTCGACCTTGTCTACTATATACTGAAAAGATTACTACGAAGAAATGG  
TTAACTACAGAAAGCAGTTGTACAATCTTACGGAAGCAAAATTTAGGAAGAAATATTCTTGAACCAATACAAAAGTGGATTTCTGTTACC  
CGGGTGCAGGTACTTATACCCGGAGAAGATTCTGCTTATTAGAATCGCTGAAGGACATTTCTATCGCAATGCAATCACTCAACCCATAAG  
CACAAAAGTTTTATTGGATTACCAACGCTTATGCTAAATGTGGAGACGCGGCTAATCTATCTAAAATCTGAAAAGAGAAATCATAAATAAGG  
AAATGTCAACAGTCAAGAACAGATTGTTTTGCTCTCTGGAGATGTGAATAATCCAGGTATAACGGAAGAAATATTATCTATCGCTGAAAG  
AACTCATTGAAGACACGCAAGGAGCGTAAAAGGGGGATGGGACTCATTAGCTGGCGTGTATGCTGGAGGCCAGCTCAGGGATTTAATAA  
GGAGCAATGTCAACAAGCAACTATGGACTACCAGACTTGAAGAACTGGCTGTAGTCTTGAATGGATCACTTATTGTGCTGAATAATCAAG  
ATCACGCTGTGATAGCCTCTCAATTTATAAATCTACTCCAGTGATACTTGTCAATTTGCTCTGTTGCGTCCAGGAATGAAGATTTGAGG  
ATGACTGACTGATTTACAACAGGAATGCAAGATTTAGTGAATAACAGAAATATCTTACGTTTTCAACAACCTACAGGAAGGTATAATTT  
GCGTTTTGCTAATAAATTTGGCGCCATTCGAAACATATGTAATAACTTCAACACGACCTCATTGACGAACCTGATCATAGCCATTTTGG  
TAATCTGTTTCAAAACAATTAATAGTTTTTTAATATATCTTTACTCAGTTCCATTACAAGTAATTTGTGCAAGATACTGACGTTAACTTGAGA  
GTGCGCAACCCCAATTCATCCCAAGTATGTACCTGTTCCAAGATCCCAACAAACGGAACACCCGCAACCTGATCAATGAATGCTGCTT  
TGCAATGTGCTACTAAAGCCCCTAAAGCTAAAGTCCACTTTGGTCAACAACCGCATCTGATTGTTCAAGGTGAACCGGAAGGTATCAAC  
GGATAGCACAAAACATCTGCTTATTTCAATTAATAAAGAAGTGTTTTTTATCAATAGCGGAGTGGAAACCCTGACCGTGTGACAATA  
AGCTCAATCGGAGAAGAAAAGTTATCAATAAATGATCGAAATTTCAAGTTGGCATGTGTCACCAGCAGCTAAAAACATAAGTAATGTTGTTA  
TCAACATTATAAGGTGTTAATAAACGAAGAACCCTTAAACCGATTGCAAGAGTCTTCTGTCAGCTGCAACAGCCGCTGACGATGATCATGT  
TGACCTACAATGATACACTAAAGTTGAGAGTTATGGTTGAAGTAGTGAATCGCTTATGTCACCAAGACAGAGTATATAAAGTGAAGAAAG  
GATCTGAGCAGCTTTCAATGACGATATCTGTACTGTTTTGCAATAGCTAGTGTACAGCTTGGCGAGTAAATCAGGTTGAAGTGAATAAT  
TTTACCAGGACTGTATGTAGAGTTGTGGAGCTAACTGACCCTACGGTCTTTTTCTTGGTCTTTCAGAGTAAAGTCCAAATTTGGAGTTCGAC  
CCTTAATGGTAGTTTCAATGATCATCATGAGGCAAGGAAGCATCAATTTTCTAAAATCCTTGATAAAGGATGGGCTGGGTTTTGAGTC  
TGAGGAAGTCTTTTTGTTATTACAAAACATTTCTGTTGGGATGATAATTTAGGATGATGGCTTTTATTATGCCACGAGTAACTTTGAGG  
GTCTTTCTGTCTTCTCCTAAAACAAAGTCTATGTTAATAAGGTTCTCAAGATTTCTGGAGATCCTGCATTCAATAACAAGTTATCTTTTTCTG  
CATAATCAATGACTTCTCTTCAATTTGACATACCCGAAATCTGCGAATATTGCTTTTTATCAATTTCTCAAATTCGCTGCGAAGTCAACTCG  
CCATCAATCCATAGCCATTGATTTTAGAAGAAATCGTCTTGTACTTGTATTGGAAGGTGTGTTTCTGAATGGTGTCTGAAAGTCCGCTTGTGT

tactctttttgacgatgttgagggtgatcctgggacgtttggtagaatttttaggtttttatgttcgaagtaactatgttttggactattatccgga  
agtctcagttgaagcatcgcatcattgacgcatcaaaatttgcattacacctgtgtaacatcgtcattattgaggtatacctcaacttagagccata  
aaaatcagcaacagacatgtctaataaactgtacaatttcccaaacgagagtcgtattaataagaattgatcgaaaacactcaattc  
aattaatggtaggtcagtagcatattgttgaactttacctatagacaaaccagaagcatcactctgctgtgtattgtaataacgagtgtagcg  
aaaagcgaattttgtgtcttcagatggacaaaaacataaataatggggaatagcctttgaatgaagaaacataaaacctttacattattaagt  
accaaatgaatatagctatagcatgttatgaaaggtttctagcgacctttcaattaggttagaagcgcacaacgtaagcatgtttgaatcaatt  
ttatagacgtattcagcataaattattcttactaaaaccattttctcaaagactattacctaactatggttcaattcaaatagcagaataaac  
aagaaacggtcaaaaaacaagaatctattgttcagtgaggaaatttagacagaatttttattgccaagtcctgctttctacaagtgcaaaaat  
atcaccaatttggcttcgttccatgagtcgaagatagtgggctttccagttcctttccaggattgtttacattaccggtcaataactcttcgagcaact  
ctggccaagtggctggagtcgaactttctatcctttcacacatttcttgggagaaatagactccattctgagctggactgacgtcctaact  
tcaagggaaatcattctgcttccaagttcataagcaaggaactcgaagctggttttagctcgtctgcttcttcttctgctatggacatggcaat  
gctacagagtctcgaattattatgggagcagcgaatgagaagcgtcatcaaaatcgtgataaagattcaaaaagaccactatcggataa  
ctatgattgaaagccatgcatgtttccaccagggaatattgattcagaacgtccaaataaagcgggaatacataccctttccaggacctccagca  
ctgaaggatcctccgctcctaataagaattgaagacaagccaatgcgtatatacggggtcagttacagataaccctccatggctatcaacac  
atgggagaattctgctggtatggaaccacaggtgcttctttttgttattgacatactctccagtatagtggaaggtctttaaataagagaag  
gctggtttgattttgtagatgaccataaaattcctccgttacgtctctagcgacctttcagagataccggaataagcaagtgcatatttttagga  
tgatagaaatgttccagataccgttgatgctgtctgttaccggaagatgcctttccggtgggcaaagcaaggaattccaagagtgttgtttt  
gaaagcagttacatgagccaattcaccaaaaagagcgtctggctggccagagctctgtattttcataattaatactgtcacgataatgcataag  
atcttctccgaaatctcaggataaaggacctttctgaaagaagtttgcattttctaaatcctcattaaatacagctgtttgtagatcatcg  
actcgcgactagttgcgcacataataaccaccaagaattcaagtttgtttcatgtcttctactgatgtatactttgttcttgaacgcaaggc  
ggtccataaaatgactgattcctgtcagttcttttagttcatagcgagatcctccgtttacgtagacaccaaggcccgaatgtctggccgtgg  
atctgtaacgaaggtgactccattctgcaactgtgtgatcgaataggatacttcaagcacattgtagagaaaagcttcttcttcttcttca  
aacatgactttaatccatgattatagaaggtaaaacccaacatttgacttaattgagcggaaatttcattactcgcacacttctggtgggct  
aaatgaggtgcgagagaagagagcgttaaaccagccgatgatagatatttgttaaaggaaggatatttggagaatagatgaacgttcat  
gaagatccaatagctgtcattctgtacaaggttagtaaatctcgtagacgggtatctgaagttgcacattctttgttcttcttagcgacta  
ctcttgattttccactcagaatgaatatagcctttatgttctttatgtccaaataaacttatgaaatttatcgttgcatccttctgcaagttt  
tgaagagccagatttctctcacgtattgaacgaaatatcataagacagtgacatgtagacacagctaaagatctgttgattctcaacaggagt  
ccgccattttatacaatacaatccatagaaattcaatttcaattttgtttattaacgtatcgttgcaagttgtagcagttataaaagttgac  
gttgtaggaaaagatgtgaatgatcttctctctcttcttcttcttcttcttcttcttcttcttcttcttcttcttcttcttcttcttctt  
gtagtttctactcaaaagcgaaaaatcaccggttttattttgattgtacataagacgcatagtagtaagtcagtagtactgtatgcgaaatct  
gctgtttaggtttgctattgctctctctcctcatcgttatagatctcaaaatactggcctctgtcaatcctatgcgatgtttcattcttctgctt  
aggtaccaagctcagtgagtccttgaagtgctattccagggaagaattgatgaaagcattgcatctgactttgtgtttatgcggatggaagaaga  
acgtaaaaaaaaactttcgttatgtaatcttcatcaagcaatctcaaaaggctagggaaatgggggatcatgctgtaaaaagttgcaaaccttc  
ggaaaaagtagagcatccaatttgcgtttatgctccatagacctgctggctaaaatgagaggtgaaaaaaccttcaagaaatcaaaagtagg  
aaggcgaagcatgagagcaaaactcgtctcgatacgtactttgtcatggagaattgataaaaacgattagaacggaaataaaaggggctg  
aaaaattcctccagaatggctcatggaggattcacgttcaaaaataaacgaaacacccctccggtgtcctgaacagaaaaaacggtttta  
tctacgattcgttcgactggatcctgttgggaagacttcaaacctcctcagctttccaatcggctgctacttttactatgaatgtgtcgacaag  
aattagcatgtaaaactctgcttccagattgcttcttcttcttcttcttcttcttcttcttcttcttcttcttcttcttcttcttcttctt  
gttttacacctatacaagggtcacaaaaaaataacttactgaaatttcttctcagttgaaataatgaacaaacgaaatcccttttctcata  
attacaagacatgaacttaacttttcttatttcaaaacttcaaatcgaacaaatcatcggctaaacaacagctatttctatgacatgatg  
gtagaacacttacctacgtcagtagcaaaaatctcgcagctgataatttagtagcacctgttagaatttacaacaacgtaactttatctgtttc  
aagtaaatcattgtatttattcaataaacaatctttctcaatcgagttgaaatttaataaaatcatggatcatggtcacgacaatggaaattc  
aattataaagcactgttctatgaagatgacatttaataaccgattataataatctttgtatagcttcaacaatggcatattagttccggtttgcaatt  
tgggatttctgctggaattgtcttctggggtacgcgttgaagtagcgaagctataattctatcgaagaatgtttttcaaaaggcctata  
atgaacaaacaaatggactcatcacactgcaagagatcaggaaaggttagctgtccattccgtctctgtactttatgctattcaactcatatt  
cttctacttctaatgctgttctatgacttaaatgcttattgtaattgtccattgccatcgggtgctgcttgggctatcgtcgtcgcactgtgat  
agtcttcaagtgctggctttgcccattagtttcaatgtttcttcttcttcttcttcttcttcttcttcttcttcttcttcttcttcttctt  
atgttgttatgtttcagaattcgtttagctttacgaatccctcattgtgtcttcaacgtcttcttcaataattgtcgtataaataacagacttctta

aacagagtcggaattatcgtgtggttataatacagacattttagatgttctgaatatacatacgttataaataagaagtttcttattgtgtattgt  
acaattcttaactttccagtgatactgattattaacctagaaaaacaaagaacataaaacataaagaaaaaaaccaaaccataaataa  
gttttaactcctaaaagtcataaatacaattcctaaagataacgaactgcagataaaagtttcgaaatgttccttcttccattcagtttat  
tgcattcgcttcaatgtttccaatagctagcaacaagagtcacctcttttcagctggtacattgtaattaagtggaagttgactttgattata  
aatccatttgcattttgtggaggagataacccttgcattcagctgataggaaatagtttcagccatttgagaatcttttcggcaactgtccca  
aagatagctgaattcctgctcaaattgagcatctacatctcccaagctccgcttagtttatgagatgtataccaatggccgatccctagtgat  
acccagccatgcataaagcatacagccagctcatacaataaccagggcaagtaataatcgatctcgggtatactgcttgcattctgtttctgatgg  
atttgattgttagcagagacggttgcacctgaaaagagatagacagatcacgcagaaggaaagtagctgtcttgagaagaaaaaggaaaga  
aacatgtgttttaggagaacaagctaagccatgtcgaaggatagtcataaataaaggaggctgtgtggtcatcatgcttagctcgaagctgg  
agtgtaggaagcctctgttaaaatcgttagaaaggtgaaatcgaatcgctgattcaggtggtcttcttagttaagtttcataatcaataaatt  
attctgaaaggggctaaggtcggtttcagcgggtataagggatcaacatggttctcatctataattggattgcactcgtgtcaaagctgc  
aaagagaattccaaatgtcgaaggattgggaattgtaatcggatagaagaggaagaagtctgaaagaattactcgaatcaacctggattgat  
tgcttcggcaaaaattgataaataactgatttataatagaacattgcttgttgaggtggccttcttcttctcagaaacgg  
agactgttctgaaaatagagactgtttggtgcttcggggcagacttgttagatgtatagtttatgtactttccaggatgacttgtgccacctaa  
aggggaatcaagcagatgaagattggttagggtagttgcatcctgtgttggtccttcattatagcagaaaaatcaccacgttagaagagtt  
cgacatgttattagattgtaaaactctgcactggcctgctggacgttaacgcactactagaatgagaaacggtcaaggtaccttcaaatgatt  
acagccgaagaagtagttccatacgaagtcggggcagtggaagcgggataacaggagggcgattccagaaggagacgtgggatttaactct  
tcttgagaaggaacagatggcaaggtcagatcgtttggttttagaaatcaagttggtgacgatagggagcattcggcggttcgagcatttaa  
gtattcatcatcgtcaaaatgattggcgacagaactatactcctcagaatgtgaagaaagcgggattctgcatacaattttccggaataatcaaa  
atcgtcatcatcaatcaggggtgcccgaacgctgcttagttgttgagcaacacagtaatgatcttcatcatatacactagggccatgcat  
cgttgggaggaattgattcggaaaggcgaagaggagaacctgttcgatgcacatgaattcgagtaggtttgctttgggcaaaaagacaat  
cctctgatttagatattggagaattgcatagttgtgcaaattagttgacgagttaaatcacgatgttttcgagccaaggcatctagaggtgagag  
accatgataaccactctacgagagccatccaatccttcgctgctagcctgtgcaacggcaaaagggctactctgaatttgtgatactactc  
gaaagtcgattatccacatccgacatttttaacagaaaaaaaggaaagaaaaacaagccgaagaagtagagctactaaatagaaaagaaa  
gaaagaaagaaagaaagatagagatgctgcgagaataccaaaacgaatgacaaaagattaagtaagaaagaaacttgcgagaaaaaaa  
gaaagcgaagctaaaaagtaagccaaaacgaaattcaaaagagctctataaagaacgaaataactaaagataaaagaaagaaaaaga  
taataccaatgaatgaaccggaatataataccactgaatacaaatattagaactcctgggggagttggctgacaattacctttaaagggtt  
tataacatagagcaaaagtagaaagggtcgtttttcttttcttattgcagaaaaagcaaaattcgggataaatggtagtagtgag  
agggtggtgagtagtagtattctgcgtacactattaggtaaccttcttctgatgtgtcacgtttggcaacatttttaggtgaggggtttatgtattag  
cgatgttgactttttattggtaacatgttgaatttcagattaagttataaccttttagtctgtttaaaaaaccagaaatgagtaagggaaca  
agaaaaaaaggaaaaaatgggttaaaaaagacaaaaagacacaatagaataataaagataaattggaaataataaagaaagaaa  
tgtcgtttgttattttccaggagccaaagttaaaaatacaaaaatcgtttgtcgtatgttttgatgatgatgatcgaaataactgtgtgt  
acaagaaaaaacgcaaaacaaatcaaaaaataaaagaatataaaagaatataaaagcaatacggatatttagtactcatctgttt  
gaatgccaaaaaaaagtcgttcgtaaaaatgatcttgaatacaaacattttttcataaacactgaaacagtagtctcaaaatgaattgcttgg  
aatggaagaaccattttaattgtgtctaaggatccttaaaactgattcaaaaaatgaacactcagagttcacagtaagctatattgtacatgaag  
aaacctcaacacacaatgaacagcaagattgatgaaaacatgtctattttattcagatgcattcctataatcttttttatataatataaaggc  
atgactaaaaacaattgactataaagccattttcactcttgaacgttatttgtttttttattgcagccctggaggcgacaaaaaaactgcc  
cccactagatgggttcaatgcagaatcgttttaaaaaataaggcactcgtatagtagtctgagctagttaacgaggtggttaaaaaaaaga  
aattgccatcgctgatgttgcaaaaaccaataagaaaacgaataaattaatcatattttattaattttattaacactttttttcttataagtag  
gacgtcgcctgcatacagaacttcaacaaacaccttaacctatttggtaagaaaaagaacttttattcttttcaatcaggaactgcgtttacgt  
tttatgtctgctattcaaaactcaatacaattggtaagttgaaaagccttaagaggaaagcctttgagaggattagcaagaagaacgagcatat  
gtataaagcgtgtcgaactgtcgtatcgtttgtagaacggctgtgattgtttggatacgtttacgttcattctgttttcttattctgtgtgtggt  
ccttgaatcgatgcttaattgaataatgtatacatgacaagaattctaactatttttagatccttttgcactggtgatgatgaagctcagcc  
tctgaataacattcatattcgtatccagcagagaaatggcgtgaaaacattaactactgtccaaggtcttctcgtgaattgacttgaagcgtatct  
tgcgtgttttaagaaggactttgcttgaacggcactatcgttaagacgacgattgggtgaaagttatcagcttcaaggtgatcaacgtgtcaa  
tgttatgcagttttgactcaacaactggcatgcaaaaaagaacataaagatccacggttttaaatgtctttattttggatagctccctctt  
actagtttttttagctaaggataaatgtaatgagtggtcgtcctatgtataaatgttttactgtctgtgaaagtttagcatcaatcaactata  
gttggtagttccgtttggcatacactatgtcttctgtagatatacagttatttataatggactcataaattattactattctcattgaaaa



atcattaggaagaggctgacgaggttagcttatgtttacaatcaacagacgtagttctgatgggttttagttctaactctttcgcggtagctgtcac  
catttattgattcatgtgggatgtgggtagagttcttttgccttcaaactgttcttttggcttccattgattgcccgtggaatcaggcatctgtaat  
tggccacaaattgtgaactcccattttacaaggaaagtattcattagacaaatgattctttggtagtaattcttttttctcattttgggagacgc  
taaggcttcttttcttattacatttctgttaactttctctctaatgaagtattgtaagtcagggtttttcgtttgagggtcttgcgaagttgatt  
taataaattatcatcctcatcagagaattcgtatagtttagcttgaagtttctcaccaatgacttcgcttctgatattccttgaaaaaagactt  
ttttgggcaactccatacttttagtggcatcggatatagttagattgagaagaatcattccaaaactttggcttgtttttcgggacattatgctttt  
ctttcagcagggttactttatagattatcatccctcattgcataggtaaaattattagtgataggtatagacgtttgtgattgagtgcttttgact  
catcatctgattcacagttatcggagctatcactgagatcttacttaagatttagccaagtcaaaatcttaacgtcagattcgtgagattgag  
gagttgcggtctgcttcatctatttgggtcaggagattcaactttttctgttatttttgggtcttctgtttttctgttatataacatatgaatctt  
tggagttgataaacctccctttatagggcaagggtcatcagagaaaaaggcaatatcattcatatgaggaagaacctggttcaaatatcaga  
tccaataatttatttctgtaaatagttcagtaagtaactgttactaagttgcttctgcaataccataggttctacatggagttcaatttaggatcctca  
taaaaaccgtaccaaattctgtttgacggaggtggtttgattagaagacggactcttcagacaaatgccttagacgaataaccaatgagaatgt  
tactttttagaaggaattttgatccaagctttagcttcgagccgtcagctttgaaactacagtcaccctggtatagtagtctgctgagatacatt  
gagcttctctgttctgaaatcgagacaagcttaagttgtcaataggaatggattccaacatcaacgttggtaacctgaatgtcagacat  
catttccggctacttattttcgacagtttgcgggatagttgtgcttgacggatttttgaaccttcagattatgtattcctaaatagatcctcca  
atgaatcgctttagccaggttagatcaggagaagaagattatcgaggttgtttttgacagagtaatagtaaaactagcaggaccgtcagttgg  
tctaagaggggggcaagtttgcagaaggagagaagttgaaataccaatcttcttttgcagcggacttctgcatagagatacaagtttgaca  
ttctaaacttattgggctgactgaggatgctgcttactgaagtaggcttttagtaaaaccgctttcgattgctaaatgcttcattctcggaaacttc  
agaaggaaatattttatagatagctcttagatctagtgacgcagtaaaacaatgagtgtttagtgggtcgtgtagtaaaagttgacctcagatc  
agttttacaaaataaactctttcgggttctttaaaccagatcagctgctttaccatcttcattacaatcttttagatccgaaagaagggcatgaga  
cttacttttccgtcaggagactcttcaatttcatgaatttgaccgagccactgttaccattaaggaatgtggagacaaccttaaccaatctgaa  
ttaagacttttcaggagaatcagaaatagattttgcataagcctttgtagaaatattgtttcgtcaaagttcttttaggttgaaacggcctgaat  
aggtacaagacgatcaacaaaggcaagaagtaaatccacctaataaataaagaatgaatgaaagaacataattgtagtaactaacgc  
tgaaggaacacgcaaaatgaaagcaagttgggtatattaggagacgtttgttataaatatccaatagaaaagatgcagaacaaataaat  
attcgtgaaaggattaagggcttatgtaggtctgtataagctcaaaaattcatttatttagcagttgagcaagaggtgtgttggtagattacgt  
attgtttgttaacaggctcctagttataggaggcgtaaaataaaaaatgtttttaccaatgctaaaaatacacaagaattaccaacaaaaaac  
ctatgtatataataaattcaaagtgagaaaaggatctctttatgctatttgatgcctgtatattaacagctctataataaaccaaaaaccata  
aaaataaaagagaaaaataactagtaaaaacatattttgtctgtttgtcggttaaacgttgaagtagtcgggatgctgagaaattccataa  
ctggtttttacaatcattgtttgtgataatgttgatgatttttctgtgtaaatgtatagtcgagtaacaacaaatttaagttcgaaggttaggctt  
cctagttcaatgttagttaggaataagttaaaaggttaggtacataccgtttgtcaattgtagtatacgttgaggggtccaactgcatgcccatt  
ttgtttttttgcagtaatcattgttctgctgagtttgatagctttccaaaagtttgcattttgaattcatttgtttagttttcgaagagccttg  
acgatatcaagagctcgtaaagcagaaagacagaagattaaagtagtaggactaccgtttgctcaactttttgaacacattttctgattcggaa  
ttttcgaatgcatggagtaaaaagctgtatagttctcagcttttcttttggaaaagtcagggtatcttgaatgtaggaagcttgttaattgtt  
agtaaaaatattttgagtaggacaagttacctttgataaatctatcttgcagttcgcagcagacaaatccttaaaattcaacgaatctgattatt  
gacaatgctgagagaatgtccggagagtgataagagaaccactttgctggtcagatgaaccaaatttttcttttcttttcttttaattttcacgt  
tgacgtttacgcttattcctttttttagaggtatgtagaggaggttccagcagtagtgctattttcatgtgaagaaatgctgcttggcttcttattct  
ccgactcattgaagaagatcaacttggattccttaattcatcattaaatcgtccgacttagttccgtatacttcatccttttagtgaggttagggtg  
ttagaagggaaatattgtaaaggttgggttgaagaaaattgagaaacagaaaagatcaatgagctaaattcatggactagtaacagaggaaat  
tgcaatgtaaaaaagaaaaagtaagattgttttgatgaaaaagaaaaataatattaaagtaatagagaggaaatcgtaattacttcttta  
aaagaataaagtgaatattgtgagtaaaagaattaaaaaggaagcggatttaccaaaatattaagttttgttaacttgttagtcatagtaaaag  
atagtgaaacagtagtctatgaggatctcaatagtcagagagaactgctattttcgggatggttagcttgttttagtaaggttggaccctaaatta  
tagccagattgttggtagacattttgtgacatcgtcttttctttgattttgccaatgaattgtaatatgtctaattggttagtagttggcatcagg  
caagttaatacgcacgatgcacagcgtctctccgacgagcttctgctcaacattcccggcttataaagctgttgaatgttattggaatg  
agaggttcagatagttcacgaaaaaggattttagggagatctgcgagagagtgaaatgtcatttccgtaactcttaggggaatttagttcgtgagt  
ggttcaactgtgaactgatgacgaagggctgaaacctttgagccgaactgggaatgcggttagataccttggagattaagaccgaaagtttctgat  
ttgagaggtacattgaacaacaatgttagggacattggaatgttcgctagaagaatggcttcaagatgagcaccaaagagaatggatgtgtcc  
agtattttaggaggtgagctttttagtagcattagcatgatgagacgaaaggatcaggagaaggaggttctgttgaagcagaagctgtgga  
tggtagcttagttaagggcggttaattgagtaacgttggattcagaggattcgtgaaccgtagcatttgttgatcaacgttggtaggtgggttctg

atttcgtgggtgaggggaggttttgaagagatcgagaaaataggtgtagatggttcagtgcttgcagtgatggatggtagtggttcctgtttatc  
cgattttggcgcggttagcggttgaagagtgatgaggaagtcacgacgattaaagttggaagtgattgggaggaaatggggcggattagag  
ggaatagaaatgtaatatagagggtgtagaggattggttagcgggaccataagagcttgccggttgacgatttctgtttgatgcgtctgaa  
gggttttgggttattcttccgcgaacagcagatcaaggacgtattggcgggaagtcagcattcgagtgaagttgcaagggcgtttcaaagcca  
gagctttctgtggatgggttttcggacgaattaagagacggttcacacagtgtagttcgcataatttgaataacgaaggaattacagttta  
aagcagcctctatttctgttcgaaactgaaaaactgtttatataattgggacggtaggataagcaggagctctgttagcagtttgagcattttg  
aattttgacttcatgtctgactctgcagattcagcctttgatcgagcctcttcaagtccgatagttgtgcattcgattgggttgaagaacca  
actttctttgattgtcgtggcgttctttggcaagtgatgattatagtcgtttcagcgcctttgaaacgggccttctgattgtcatttgaataac  
agccttaagtacgtatttctgtctgtttggcattctttaaattgattttcgtttcagatcacaattttgaaggtccagtagctcatccgaacag  
ttgaaagagctttttgctgagtgaaggagttggaggctagttgttctggaatctgaagagatttataagagcagccgaaaagaagttgatgga  
gggtttttcttgaagtttcaagaaacgacttagcgtttttgaaatcctttgggattgttcttcaagaactgatctttagaaaattgg  
ccagttcttagaaaatttaaatgggactttatcggtcattgaggattgagagggcagttcactgttaggaggttctatattagggtctttca  
aaatccagcattggcttccgatccatgataatgaataggagtagtgaagtaggtagttgaagttgtagacacagacagagggtggagt  
agcgggagtgtagaagaactagagagggagggaaagagtagtagaagatgcgtagaacgatgagagagagatgtagtgggtggtatt  
tggcagtttaagatcagtagacatcatgctaagaaaaagcgaagctctcggcgttctaagtttagtgccatcccacgatgagtggggt  
gtagactatgtaggttagcttagtagatggaacgatcaggaagttgaagagattaagggcataggtagatgaaagtgaaaggagtaaaa  
aaacgcgttgaagatattcatggtagcaggttagatgattattgtcttacttttggtttttcttttgaagtgacgcgtaaatcaagctaataa  
cgtgaaagaggatacataatattccaacctatgtaaaagcctcaaaaaattcaagaattagaagaagctcaaaaggtagaaagatataat  
aaaaagataaaagagataaaatagtcattcaattgattatgacaatgggataaaatctgaactgacagtagtctgatgacagtcaact  
gtcatcaagtagatggaccaaataaagtcggatacaatcatagaactgataaatacaatagaagcttttatagtttagattgtagggac  
tgaataacataatatttctgatgcacagcaccacctaatagccagaaaagccttccaaattactgaaccgttcttatgtagttatagttg  
ttgtttttgcttctttctcaagtttcttggtttattgctagggttaagaaagtttagttgtagcgtcacaattttataaaattct  
agtaattccagcttccatgtttttggttcttttaagataagaattcatgtttttttaggtaattagtgagctgccagtttaggttctttgcttag  
catatttaggtgctgtcgaacgctaccttcttcaatcataagaatgcaaatgaattctactttaccacaaatgtccagcggtatctctgatcc  
ggaatggaatgaagaatatttaacgaaagatgctttaaaactattgaagatgggagagagctgcataatgttccagagggtcactc  
cattactgttccatgtctcagacgtcttctttgatagctatggtagcacagacaccacaattgtctctataaattagaaactgcagagtt  
ccagggtacataatgaaaaacatacgaagcagaacatgcctccaagagcgccgcgaccaccaaatgtttcattctctaccgtaagaaaag  
caatcttactatccgaaaccaatcctggaatgaccgaatgctgaagttctaaattgggtggcagcttttggaggaggaatcaaggaagtca  
agatgaaatacttaagatgtagaaggttataaaaccgaacacgaaaactatccaaactacaaatcagccaagaactaggaatactaa  
gaattttaaagtaagctataataacatttaattttagcgggtcattaatttcatgagtagtaccagtaaagtagactacattacagctgg  
agacgaacgtgcctataccgagttgcaacagaggatagctattatcaataaaaattatattcatcccctaaatcttaattagcgaatgagaat  
tgaggtagattgcatgagacgtttgaagtcaggtcatccgggtgtaagtcgatatggttctcatgtcaaaatacatgcatccagtgccc  
caattctataaaacatgctgtcttttcttctgtgatactccaaaaatttttccgtaaacaatgtataggcttctctattgtttatgctg  
tctgttctatgtattttgtctatcgctctgttctacttcttcccctctttccttttcttggcttacttccgcaccctctccctcctaaagaaactc  
tgctccgctgcctacgactccctctccatgtaacctccaccctctcctgctcactactctacctgttttctccatactactgtttacaccccat  
ctcgtccacactcacaacaccatcatccactctttatctttactaccaacatgacttccaataatatttttgcacatttctaactca  
tctcattcaaacacttctcttgattcccctctgacttcaactgccatccgtatcctgctatgttctccactgcacacacctcctcttac  
atccaactcttccactcactacatcttacttctacattcacatttctctcactcccaccctcaatccagtcatactcttttacta  
caccctacccttctcctctactatccttaatccatattaagtctcgtacttctctcactataactcctcttactatacctcctactcgc  
ctcgtactcccctctactaccacatccccacttctccgatacaccacatacaaacgaaactataatagctaaacatttactaccctcacc  
ttacaatactttacagcttccacacaacatttaacataatacaaatctcctatcacgcctactttcgatttagcaatagaataacattt  
taactatctcaccacacattccttatactcattggtgataatgatgacaaacatgttcaactcctcctcactacattacc  
caactcactctactgtttctcaagtagccgcaaacactacaacaagccgaacatcacataagcaaaatattctacctgggataaaatt  
gtagccacgctcgggtcctgtactacaacctcatccgcagacaaccatacgaaggctcattcgcccatcacatcgcaaaaactcctct  
gcagtagcagaagctataattcacagattatgtaactatacaatcaaacacatttcaactccacagcaaatcttagacactgacgtcga  
actacactcttggtttctaaaaactaaaagctgaagcgttcacaacattgaggtgctattaaaaaacttaccatcgaatgatacaat  
agcccataatgtaaccaagccttggatacactaaagcaaacataaaagtgcaaaaggtggacaattgaaatgtacatgatattcacttag  
gagcgttagagcttagccagcagtagactctacgatcacaatttcacacattttgtctcgtatagtaaactacagttcaagacatcga

acaactactgctcctgcgctcctaccaacaattgcagcttgacttatggcattacccaaacattgagaaactaaacaccactattaata  
atztatcatgtagtttcattcgcaaattttactatgcttctatatattacatcttgatccttgatcatatcaacccttcaaaacaaatagaaaatg  
gtattcgacttgacatttataaaaaaaacctctattcataaactcctaggcctaaacgtgttttaactctacataacggagttcggtacacttctt  
acctacacccaaataggactgctttttcaaggctataaatgactaactaccttctatgttctatacaaaaccaagtttgcctactgttattt  
cgcttataaaaacgaataacggtttactacatgcttggaagaaaaatagtcgactccacctggatattctttatttatgagtttcaggactaaa  
tcaccgactaaaatcttttcattataataactatgtatataaatctaaaaatatttccttcatataatattaatccgtaacttaataaccacaaaa  
ataattacaaaattaagccactacattcttaatttctttcgaatatgtacactcaactacacttcccataccagaatggaagtctttatcacctt  
aatttaccttatacaaatctttcttttaaaataataagaataattttcttctttaaaggccatattaaccattacattactacattctgtcatct  
attcaagatataagaatcataatattcattcataaattcgactacaaaattacttgaataattttgtaaactcatttctccagattcgccctgttcag  
aacctttacgacagcaagttcgaatcttcttgagtaacatgcacacggcgttcacgtaagcaaacataaccagcttctgtacaacaccttcaa  
ctcggcaccactgctccagtcattctctgcaatacttccaggtcaattcctcgagtcaagttcatagaacgagaatgaattctcaaatctca  
gcacgagcttcagtagatggaggagggaattcaattttacgatcaatcgtccaggtctcaacagagctggatctagaatcaatcagattcgt  
agccataattactttaatattctttgtccctcaaaaccatcaagctggttaacagttcaagcatcgttcttgaacttactgtcaccgctaccgcc  
tccagtatcagaccgtgacgagccaatggagtcaatttcatcataaaaaataatagacggagcatgctccctagccataacgaaaagttcacga  
accatcagactacctcaccaatgtacttctgtactaattcgaaccactcacacgaataaacttgcaatcagtagatgtgctacggctctagcaa  
gtaaagtcttctgtacctggagggtccatacaataaaatccttttaggttggaatacccaagctctcaaaactacatattagctttcaaat  
cgtccactctgctcacttactctggatgtttcacaggttaactcaatcacttctttatttcttggatttggttttaaaccaccaaccatttctgaag  
tggagtctgggattttctcaaccatcatcaaagaatcaaaggatccactttattaggaaggatttaatacaactggtagatgagtcgtttcttaaggc  
aacacggatattaggcttgatttcttgatcgcacatcaggactaacatcaacgacataatttctcaggattcacctttacaagcacctgtttt  
accatcgttttaactcttccaacataacttccaggctctgaagaagctgaatttcttctcagaagcgaactctagcgttcaatccatttct  
ttgggcttcaatcgtcgaagattttgagttttgtaagaatattcaattctgcattttggatttttgggtataataactaagacgcaagttagaatca  
ttcaactaaataactacttacttactgtactatgtttcattgctttccaggacattggaagtcagaacttccgtcattttctatagccacttaattgtgt  
ggtgtgtagagattaagtgaaggctacgtttatagaattttccatactccactcactacgctaccacgctatttggccgagggtactcatac  
tcttattataataactcaaaagtagcaatatactcgaatactcaacaacctgtttgaaatctatttatttcaatagcagactatttgaaacatc  
atttctgaatcaaaactcatgttcacaaaaatataagaattataaggaaaatttttaataaataaataatctatcttcaacatttcttcaa  
tagttcctatcaactgtttttacaattcaaaagttaaatatacaaaacgacttcttcttcttttttctcccttataatcgatgccagcaact  
ctcaatatcttacttcaataattttggctcacaacgctgacacgatcattctttcacaatgtgataaatacgtttcgtccttccataagggga  
atattccaactgaaaacacgtaaaaaaatcaaatcaatctaccacaacccatccagtaaagaacgctttgaaaatataactttgacca  
tacatcgccaagggcacagaatgatgaacactccggcaacggcgttgacgcaatctttgatattatactgacgggttaagttttcttttgca  
gaatcttttcttctcgaatcatagtgatctcaactatctagtagttccttaaaatatactttcgggctttaaagaaggacaaaacaataaat  
ataccacgggactcaaaagtcgacaacattaccgctagcataggattatcgtcctgtcgtatcaatcgttaatttacctgaaccttgcgact  
tgcgaccacaagccaacaacaactggaataaggcctaatacgggcgaaagagtaattgctagttagaagctcgtgtagatagcatac  
gcagttgcagggatgactgcaggacataactaactccatcaacaggtacaataaccattgatactttccatagatataatccagttgcaa  
agccgacattgtaaatccaaatgattataatgacatgccaggtatacagtaattctttgttgcggcttgcgtcttatattgtttgatatatc  
ataagtaaaaatagatgaacagcgattaattctgctgaagctgcagatgttacggccataaataagcagtagcagtagcgttagcacctgtttt  
accattaaagcaatggctgcatagggtaaagctagtccttgaacttcaaatcactcatacagattgggtatgtagggaaataaggcatacc  
ttcaagtcaatgcatacaagaccagttgtagtagcagtaaccaaggaattgcaaaccaggaaagacccctaaaatagccaggcagtg  
agaagcaggggttgcgcatagcttttgccaataaccgttatctcaaaacaggtacaaaattaccagcaaggttaattatgaagaaaatag  
ctcttctcgacttctcatagtgaggtaacttcttccagatttcttccacaggtatgagaattcctgcggttttaacatatcgtaaagttacctg  
gtgaaccaattttatcaccagctgaatcgtgtcaactaaacatgatcaaaatcaccaaaataataatcgtatgaatataatctgtaaggaaa  
gtagccttaattctccaaaaatagtatattatgactcctactggaagtagaaagcacgcagccacagtattcattccagtcacggaagcaatt  
gtggccgatccaccgcataacagcatagccattacaaggatgttggaacataagcgaaaaaataaaaactgtgtgctacgggaccacatc  
ggactcgaacaacttccaggaaagtatgagcattgggtgcttctcttactcaattgcaaaaactgtgaataacaatatttgaacacaagcac  
cagaagcataaccagaatgctcctgaaacaccgtattgtaagtttttgagcacttgtgagtaattgtgatccacgctccagctactcacaacag  
cactagcactaaaccagtttaacactatgtaagcaggttaaggttgcagatgtttggttttctgttgtatttttaagaacccatgaaaca  
gatatcatcaatacagtgaaaccaatccgagaccaacgactatgccatccgacacttgcagagagcgttggtgtacatgctagacgttta  
ctaactcctgttttaattagtttcaagtagaaaacaacactgaaacaaacatcctagcaatataaagtcaatatttcttatgctgatgataa  
gagactccgagatagcgttgtttcaggatgcgattcacatcttgatccttagcctcgagctatttcttctactttattaataatccattcaaat

cagtcaatcatttatactgttttaactaattttgactgatactcaagatatacaagagtaagtcctaaatgttacatgactagagcaacaact  
caattatacagttgtaggctcacaattcatgaccaccattaacacataagtcataattaagagatattctcaacgttttaggactacacaac  
aattgaagtcctagaccttaattcatgagaaatattcgtttatthaaactgagaggtacctattgacgtgctgtagaaaaccttgaatgcataa  
atctcagtttttggtttttttaaaatggatttcccagcggagctgatagagatctcattgactcttttttggacaatgaagtcctcgatggctc  
cggcagcagatgatggatatacagaacatcattcttacaataaaaggctctgggatgagatcaaccgaatgagattagaattggacgaaacca  
gaaagctttgaaaacgcaagaaagtcaaatgcaacttgattatgaagaatgaaaaggaactagacatcctccgaacgaaactggaggact  
tttcgagtgaaaaactcgaaagccgatctccttaaaaactaaaacagcatcaggatgacttagtttactgagaaaaaattaacaagccaaga  
gatcagcttctgactatgcttcatcggtgttacaagtctgaatcactgaatacaaatgaatgctacttttgaaattgaaactgataactaagaa  
atgttaactaaaaggatattcaaacacctggcatttgagtgaagttattcttaatgctcctcctccttaacatcagagactttaagattgca  
ttatgaacccaaagtaaacccaatttactacaaatataatatacttatttacttttcatatgttcttcttgaagtagactaaacaa  
aagcatttattttgaaagaactgcctaatcaagagaccgaagccatctattaatgtagtatttttaataccaagctatacttaccctc  
gtcggatttctcctcagcaggagcctctggcttggcttctctgtggcgaagcaccgggtgcgccagcagcaggagcagcagcagcagcaccac  
ctccagaaggaacagtagcagcttctcgttaccagcagcaatcaactctccaagttttgcctcaagttccttgagcaaacattcaacacgttc  
tttctcagcttcaatgccacagtggaacaagacagtttcaacgtcgttagctgatggcgattgctttccaaccaacagtaagaagtaagtaggcagc  
gagatatttataattattttatcggaacaaaatcagtttaagcaagcaagatatttgcagaaattgtctccgggtctgaagaattggttc  
cattgcatatataatgaaaatttacaagtcaaacctaccctactcataaataaagtgtcaattaagttttgaaactcggaatttttaacgta  
ggtaacataacggcttcaaatattcatttacttttactcggagtcttcaatgcttcacaatattgctttagtttactccgtttttcctttcatt  
agtaaacatgtttctttaagcaattgtctgcttaccgattatgcccaattgtttacaatattgcttttaagtttagatataatcgacaaaattctaa  
aaaagtataagaagttggtttaggaatattatacttttgattgttcaaaaaagaatattctataataacacgatggtacgcagtttagttggtt  
accataagaaaactcaaaagaatgaatttatcattaatatacagagtgctgcactctgcaaatttacaactcgatatactcaaaagaatgttt  
accctgccatagcgtacacaaatacataatataatgttaactactctttcatgagcgggtgagacaataaactgatttttagtttattttc  
taaaataaaaaattgcttatatcagctgaagatctataatatacacaactttcttacgactaaaagattactactgtactgattcagtttaa  
atatgaaagtattgattacctttgtgatactaaacttacaataactgaacaaatgataattggtcattttcatcaatatacaaatattatg  
acagtaattgtacgattgtatgtacattgtaattgatgaaaaacgatgtaccacatcaattaccaaaaaagtgaaacaggtaattgctaatt  
aacattgagctataatttcaattgcagaaccttcaacataagcaaacgattgaaacaaaagtaccaagaccaacacaaggcaaggcaag  
taggaactgtcctcaaaaaattctgagtcacgaaatagaaagcatagatctgtcttactttacgatttaagaaaatactcctcacaacaaa  
aagtaaaaaaactattctcacaacaaaatcaaaaattgaattcgccagacaatgaggtataacctttactatgattaacgttataaggag  
gaagtctactataacctatagcgttctacgcaataatccagtgacattaccgtactaaggcaagacaaatataatgaaatgaaatcataacat  
actattataaccttactgcgattatcttattggttactatgattcatcactatcttaatatgaaactcgcttgccaaaataatatacagttgtgtca  
aacaagaattacatacaatcgctgattgatttattttcattgtctcctactgattgttaccaccataactgttcttttagtcaccactcgatgtt  
gaacgatcaattattgagcagttacttctatcagtgataaaaagtacactacgacagaacaaagttttacttcaatttcaaaactaaaactcaagt  
acgtgccaagaataattcagattacaagcttgaagtaagagttattcataaggaaatataatgggaaataaaggcgtcctactacctttt  
agaaaaatgagataaaaaaagaagattttcttttttaataacatctaggctgttcttttcttcttatttccacattaacaagaatacctca  
taaaaagtttaatacacaatggtatgtggacatcaattggacattatatttctaaatgctgtgtcaaatcttactaactaaggctgtaaaat  
ttaggcttccatttctgtctatcaaaaactgttttaatacagatacgcctgtaacttattatacagcttgaaggcattctcctattattgaattt  
tgaatccaagaataattttactcctaatactcaatgaggaaacttaaaactgccaatactgaaaacttagaaaatggtaaaaaatagagttgac  
aaaatgcattactagattattaccaagacaagagcaacgaagtaaaaatttatacatgaaagatgagtgcaaaatagtagcaaggaaga  
aatcttgaaattgtgagtgaccattcatcaccacaaaagaacagatagttacagaatggtaataaataatcccttgatataataaagcttc  
ttaactctttgactgtagcgaattagcttaacttttcttaatagcttgacctctgttttacttagaagctgatgtgtgaaatccaattaaga  
ttttatcccaaatccagaaaattcacctatacttttattcgttctggaatcagtcatacaagttaatccgtgtaagctccgagaaaggtg  
ttattgaaatgagaaggaattttactcaaatatttagatgatacaatcatagatctttattataatagtttctatttgacagattgacctttt  
tcacgtatgagaatattaatgtgtatctgtcttttagcattattcctccggtaggaatctctggattataaatgacaattatattgtttacagttata  
attaacagctcttataaagaaaaatcattgacataaatttcatctcagttcatcatttgggtgattttggaactttcccgaactagttgatcctat  
ctcatttacttttctgttttattttcataactcacctccacagttttgaaagtagttatttattgaaccgtatttttttttctccttttagtccatt  
gtgttcaatctcagttgcccaatttaagtgctcactatgtaattcctatagcattaggttttaagtttcttttagatctgcacgtgcaggtttc  
cgcttaatcgaagcaacaattcgccaccttaaatatttacaacggtgaattagaccatttatacatgaatgtattaagataaatggctgttttctaa  
tggaaaaagtgaacacctagctgtattgaaacagttcatcctatgacaggcattaagtttccattttgacttattagctttttttgtccaaaat  
gcaagccacagaccattgctggtcacctttacttcaataacttcaatattcagactagttattcaagttttacctaatactttctgttcttattcttag

ttactgaatthaatttagttgtatatagaaaaatcctttaagctatttctatgtcctatacttgcattgtttttaatattacgggtctgataagctct  
atagaactatcaattatccctaggaagtttctctgatgttatttagcgattatcctggtttctgatcggccttgctattttataaccaagtaga  
tttctgctcaccagtagtctgctatcgatcattctactctttgtgttaaagttactcgaagtttgaagaattgaagttttattcctaatttagtg  
aagccagaccgagtgagtagccttaaatgaaaaagtagttattgtctaccctatttttatagtgctatcaactttgatgatatacaacaatcat  
tggactgcttgactctgtgttttgaagatagtcatttttaataatagtagcgaagcctaataatgtcggctggaagtagactattggcctggaaa  
ataaattattcgagctcggtagcttttagcaggaaatgaaacataaataaaagtagtagtagaggtctgtcctatttttatttctctttatctt  
ccctatgggtattttctgggtggcctaataaaaaagtagcatatattcatttaattgattataattaatggatttttgcaaattgtattttctgtg  
gtcctcattgattgacgactatttaacttacgcttacagtcagtgatgctcctataatcgacttttagcatgattatgacgagtagcatctaagtgaa  
ggttcagctatcccgctgtatattttataatattttgttgccttttaaagctctccttaattctattcaaccgctagtagctattgtcctcctggg  
aaaccgcttcagaatggcttaattttcactgcaacttaaaacactttacgcttatcaatattatcgctctatattgtcaagattatacaaaactaa  
ttgtgtttatctaggtttcagagcaaaaatgttaaaaagcattgttattctcatcaaatgatgtcagcagtagactcgaacactgggctctgt  
tactaggaagcgtctaccactgagctacaagagcttttcttaggtaacggcattatgacgtaattataagaagcaataattgtaaaatgacta  
agtaaacattttattcatatattataaagtagcactgtatgttgataatgaaaaaaattctacaggttaactcaaccactatttgaacatcctt  
ttagggattggaagaattaccgattcaactatacgtcctatctctatcgtagaattggaaatcttttagaaaataaagattgttttacgg  
tttcaactaattcagaaaaacgtgtgctgattcagacctttatataattacaatgaatataaacttaaaccaaaaacgtgtacgtgtcacgtaa  
gtaattctcacgctttatgagaataaagatcgagtgaaaataatctacgaccgtagaattgtatgctgtaattgactatgttgactactgtat  
agacgctagacgtagtattgtcataattggatccctcgttagcattcataataacaatccgttataagaatggaatattaactaatcagttaat  
attcataagctaaagaattgtgctgtataacaagtaaacaaagtagtctgtttaaacttctgttccgaaaggctgcccattgtttaaactcg  
gattttcattgtttgttaccattcgaataatctcatcttagtcaaatgatattgttaattattcatgtcagagaaaatactccttacagtaataa  
gagtgtagtgagtagcattgttaattgtttaaagtagcaatctgaataacttaaaaatagttactaaatatacacttctcatatatttaataact  
ccccggtaataactaatgaatatttatacaagtttattaggcctgccagcaaaaacttcttaactgaagattttgtctgagaagaacgggcatt  
tatatagtaacttaaaactaggaatatagaacaataaaactttgactaatccttgatgattatthaatctttcagctgttttctcatttagttgtt  
ataaacattgatatagagtaacatactccgtagcatgattattgcaaagtggtttatattaatattagggtgctctgacacctcccgtcctaaga  
ttctactactgtcggttttgtgagaattttatagctgttgcggctctgtatgcagaagcacgttgagtagtagcatttaattgtcgggggctaaagt  
ctggacgtagccttgccaatccaggctgtagtctggaattttcattggtaagacgtttgtgtataagcataaataaaggtaggatttttaaat  
cgtcagctctaaaattccatctatgaatggttgttgaattgttatacgtaaagtagcactgaagggtccaggtcagaaacatgaaaact  
agaaggtagcgtcgtcgaatgtttctgaaaaacttaaggtagaattgtgatcactaacttttctcgaatgtaaaggcttgcataatgctgaat  
cgagttatacttttgatgaaaaaatcaactttgcctttttcactataactgggtatgttgtttcaaaacaggggcacgactctttgtcagctct  
aatattccgcatattctttttttatgattgatctctcgtgattttgttcagcagtagacatgtgatcttgtttaggtaataccttttctctatcatt  
ttgatatccagctcatttattggcttccgaaggtggctgtataaggtgcgactctcgtagcagaatctgtgcaaaaatagcataactgtgcttg  
aggaagataactaccaattgttagattgtttgtaacgcaacaacgaagataacttcgagtagatgattactcttcggtttgaccttttctg  
tggatgatattgataaagttaggcttatgactctgcgcaattgtcccattaacggaagtaaacggatctctatcgaaacaatatcattt  
ggatagccataatttccgataaatctatcgttaaattgtttgattaaatcgtcgttgtaactgatgtgtagatgctataaccaagccatcttagt  
aagcctgtctacattagtagcaaatcggatcgttcttgagactttggtagcctgaaagatgacctcctgaagttgggtgctataaaattgttac  
aaataactgaattaattgtacaacttttgaattacgacttaaccattcgtgtataaataagcatttcgatcaaaatattggaactatcattt  
attctatctagaataactttaaattttggatgccggccatattcttcccttaagtaatacaaaaatgttcgtgatgccgtccgttactaattcaccgtg  
ataacatgaacttttagatcatctctcgcagataaagcatcggctggtcattcttccatccagattgatattggaatttcaagttataagaatcta  
attcagctgccacctattttttgtctactgtcggtagtatcttctgtggacatagacgttaaattttgtgatctgttagaattttaaaccgggag  
gtcggtagctgctacaaaataataaccatttgcgtagcagtagttatgatggcacaacgcttctttaccatgttggcattttttgaaaggtctataaa  
tgaagcagaatggaacgcaattggaatttctcgacatcctgtttgtgataggatagctcctataccatattcagatgatctgtttccaattg  
agtttcttctcgtgattatgatgccttagaattgatcattttcagtttttacttgaatgaaagccttggtagatgatctgtccatttaactt  
tgtattttattgttaagtagatataacgttctagccaatcttaattaaggcataaatcgcttagaataatacaaaaatccaagaaaatcttaac  
ttctgagagcattgggctatggctaaattgatgattgcttgaattcggctctgtccacttccatacctcgtcggaaaatattgtacgtagaaatt  
cactctattctgaaaaaaaatgacactttcgtattcaatataaatttgcctgacgcagttttgcaaaactttcgcagctgtgaacgatgc  
tcttctattgacgaagaataaataagaatattcgtcaaaataaataacacgaaaatgtcattgtatggatgtaatttccatttatgtgttggaa  
aatttccggggcatttgcagaccaaatggcataatgtatattcaaatgatccgaaagggttctaaaagcagttttatactcatctccttctga  
tccaaagtaaatgatattgcgcccctcaattctaatgttgagaaaactctggctccgtttaaaccatttatgatttctcgaagttaggtagcgaat  
tatctctttttgttttgcataataaggctttaaattaccaccattacatattatctgttccctttttggaagaatcaatggcgccataaaaacttt

aaagaacatcgacgaattctgcatgctttaataattcgtcagtcctttcctttatgcattctcttctctttgtataaggctatattttggagcata  
cgttggaattctccgttacttatatcctcaaatcattctctgagtggttcaggaatggagtgtaggttctcaaaaattctgaaaagggtt  
taattgaattccgcattttcttaagattctatcatggcttcttaattcaattttgcttagacgttctaattgttcaccttttgattaatgaccaa  
ccgataatggcatcttttcaatactggcattatagaatattgttcgaatatttacttctcggatttccaccggattgtcaacttccggttactt  
taatattgttttagttattctataaatttccggtctctatatcaaatctgtgttataatttcgctatatccttttaacagatacatctgccccag  
aatccataagtgttcagtttccaaattatctaattgacttttgaattgggagcgtcccccttctgagacactaatgtaatatcacggattttgtt  
agaactattgttccggtttttgtgctggataacgacatctagtcattccgatttctgtactttgtttatcgttctcgttttctaaattcgtctta  
ctaggaacctttgtttaaaagttcgtatttgaaaatgttcgcttacttttcatatgttcgaaattgtgtaacgaaactttcttctgctgc  
gtttatagactgtcataatcaccagtttcaaatgttttaagaagttcttttatatagcaaaagaatgtaccatgaaaagattcatctgaaatct  
gtttcagatcaattcttgaactaatttctactcttgagatttcatcaagttcaatgcttgatccatgacattatgtaattgagtaaccaggctc  
gaaaattgttcttgaataaacatgattataaacactttgaaatgtttatgtggctcctgttctaacggattctttatcttttcttaagatttca  
agagatctgttatagatatcattattactcgcgatagagacgaaataatgtaacaattcaaaaacattctctaactctttaggaaaacct  
ttgtcattcttcatggccatataagtcgggtcttctgatttagtcgaaaattgtatcagtgagcgttttccataagctctgattcattctgat  
aatgtcagtgattcgtcgaatattgatattcatcaatttccattgggatgattgttcttcttctcctcaattcagctattgcttgcgtcac  
tagactcattctagtcgtaattcattcatatgcttctcgcattgtgaaaatattgtctgtagtattggactcaattcgttcccttattgattgctga  
ttcggatcaacaattcacttcagttagaagatattttaaattagatactgtcacgggaaaatactccgtaaaatattaagagtgtgagtggaata  
cagttgtaattgtctgacacttttaattgggctctttaaactatgtataaggatagtaatatgtccgggatctgattgactaaatgaaaacg  
actaagagcaatcttatttagcgtgatcagcaaatctctgatgtaaacatttcgactgtagacacagatatataattttctgtgaaattccg  
atgtggcgtactttataaatagatcaataatcatcggaagcaaaatttaacggagtttctgtattcgaatccgaaatcgcaatttcaattttgtg  
ttgcttataaaagcagcaaaattcttaagcttataaataatgataattggttagtattccattctataaacgagggatccaattatgaaac  
ctccccgctaagagcttctacttcttgagttggaagactcttatttctcgttcttctgttggagcacaactataaattcagtgaaattcaa  
tgactttgagatgccttttgaacgatgtctctatgaacctatgactgagcagtggtcattatctgcaagttgcaatctataaaacaatggt  
agagagaaagttttctaggttattagcttcaaaaattatcaataacgatgtttgctaaaattgtttgagtttaagtcggtgtgaagttcgag  
ttcggatacatgaaaagtagcaggacaactctcgtatcgtttcaaaaatttaactcataggtatgttctcgttttcttttactgaaagtggt  
ccaaaatgttgggtggagttatttgggtgggaaaatcccactttgccattttgactaatacgtgatcttaggctgaaaatcggaggtaga  
attgtctttgttgaatactttgcgcatttatttatttttctgatactcgcgtatttcatcgatggattctgttcttcaggtaaaataaggaata  
tctagttcatccaggatttgcgtatccaagcggtaactatagcttgaataccaaaagcagcattaattggagctattttgtagcagagtgctgtg  
aagagtaaacataaattgagctttgagaagataattgaccaattgttaaatgtttgttcacgttagcaacgaagatagactccaagatttatt  
gacgcgctctgtttgtccgtttgtggatgatctcgaagaaaacataacatgtatattatggtctttggcatattgtcgcacctttccgaaataa  
aacaggtccacgatcgaacaataattaattggataccaaaactggatattgttgcctcgaatattcaattaactgatccgtggttgggtg  
gttacaagcgcaaaaccaagccattttgtgtaaacgatctacaatggttagaatcgcacttactatgagaagggtgtaactctgttataaaat  
ccatagaatagtgctgaatggctttctgcaatgggttagcggttgtaattgagcatatcgttgatgatttgaacgttgacatatgtcgaatttt  
tacatattttctggatgtctcggctatacctttccagtaaaacttctcgcggatgcgatttgttggacattttccacgatgtcctctgagctgg  
ctgatcatgaaactgattgcataattagttatacaagttgtgtagtttagggatgacaatttgccttgatcattgacgataagatcattttcacag  
gtattgtgggttacgattattttattaagaatgcttttaatttctgtgatgaaatatttccgtcacatagtcgaatattgtgtgagaatgtctgtt  
tccaggacacgattaagtgtttagtttgaattgtgctgacgagaagagtgctgacgggtcattttttgatccaggcgggtattggattccaa  
aattctataaatctagttcagttgccatctcattattttgagcagataattgtgaaccttagtgaacattgatgttaaatcttatgatcagtaaga  
atttgaatggtttgtcagtagctccaaaaatgataccattacgttaaagctgcaatgattgcatatgcttctttaccaagttgatcaaatcg  
ttgccgatctgaaatgtctctgaatgaaacgcgatgggatgataaattccgtcgtctgtttttgggagagatggctcctatagcaaaatcggaa  
gcatccgtttctaacttagtttctcgatgtggctcataatgtctgagcatagaacattttcagctcttcttaactgtgaagaatgcttgttggac  
gatattgcatttaaattagtgttttctggttaaatcatataaaggctccttattttggataaattaggcataaatcgtcggctgtaaatcga  
atcctaaaaatgattgtaacttctaagatattgggtattggcaatttgcgactgctgaaatcctctctggatcaatttcaatacctttatcggaga  
atatgtggcctagaaacttactttgtttgaaaaaatgacattttctcggtttgcgtataggttagcttctgtaactttcgaaaacctgttcaa  
atattttcatggctctttctgatgatgaaaatacagagaatcgtctaaataaacgataacaatatgccaataaaaggaagtaacatttgtta  
atatactctgaaaatttctggcgcatttgttaatccaaatggtgaaactgtatattcaaatgatccgattctaaaagcagttttatactcatctct  
tcttgattctaaatagataataggcctcttttaaatccgcttagcaatttataatctctcgaacttggtaatggataattatcctttctatgatc  
gcgttcagcggcctcagcttataacatcgcgatacttactgttcccttcttggaaactataagtggtgcacacataaagttgagaactccgtg  
gattcgccttgagataataattctgcacctttcgttattatcagttttcatcggaagtgtactgttcatctttggcgataatctggttaattcttt

gtaattcaaacttaattactattcgagtggtggagcaacggatatttagtgtttccgtgaacacttagcaaacggcttaatatttctaaacttt  
cgcatcgttttctatatgtctgacttttccagattcgtttcgccaaataaaaagtctaaatttcccaatttttaagaaggaccatccaatgat  
ggcttcattttggaggttggtgattatagacgtttctaaattattcaattggtgatttctaccggtattgtcaaatatccttaatttcaagttatc  
gttcgttatacccaaaaacgctcgatttttttgtgaatttacgcaaagctgctttgcaacgtcttcttaagagatacactgccggcagtatct  
atgaatgactgaaactcgaggttggtatcttaacattctgaggttgcgaagcgtattttctgtagtgttgaaaaatctccacatgaaattgttt  
acagagacgactgcatctcttagacttctcctttatgtagtcttaattagatctgggtttggttcagtcagttattgttatcaatggtgtgt  
ctttggtaattttcggggatttggaaataaaaactataatttctcccgatcagatcgaaataccttagttaaatacgaataacttgcagttt  
ttgaaaaaactgccacgattgttctgatgcttcgatagctaggattgtgcggatgaatcatgttaaaatagagctgctcttcgccaatgc  
ttcatgtaccattgatataatctataagtttttagagaggaagccttcatcaatttccatctgagttgattgttttagcttgaattctctgtggga  
aattgttctatttaccatcatattaattgtggtcaactgcctcagttgggcttgcagatttccacaggatttcggtttggaaattgtccgctcatt  
ccattttattgaggctcttgttcaatttcaacgactccactcttagattgggaatattttgttatgtaagtaaactcagccttatgagaataa  
agatcgagtggaataatctacgactgtagaattgtatacttaattgattctgttgtgacttataatggacgtagtaataccagggatctg  
gtaactaagttgaaagtgtaagatgacctgatttagtggttatgagttacagggttagttaccgtacaagacaaaatctattttttcatt  
cgtagtctggctaaaacaagcagtaagcaaggctgttatcctcggttacaattcaactctattattttgggaaaaaggagtaattgattgaa  
gtcaaaggatggtgtatggctacatactgagtaaaagctatagtaataaagttcttataattgcttggttggacaaataacggaaactgcat  
tctgattcaattaagaagattaagtcagtaagggacttttctactcttaaatgggacacgcaaaaaaatactgatgaaagatggctat  
gattgatcattaataaaaaaagtttttcttgaagtcaaagtaagttatgttctaataacaatttatatactgttacggaaggcgaatccctt  
ccaagttttcagggttgactttaaggagtaaaaacttatcggggaaaagttgcaaagtttcaaaggaaaattgaaataggggtataattaa  
gctgttttctatcaaatgtaagattgacggtagaatgttacttggttgacagttaatggaagattattcagaatactgaaatttcttaa  
atcataatagagaaactgaagctttcgtaggttctgttccctttatttttagttgacgaccatttgaataatgctcctttcttaagtagctac  
ttgagctatcactaatttaagtttcttcagaaaatttcaaaaaagttaccagctcacctaaaatgtggatagattcacttgtgacatagttga  
aaagtatagtaatttttagagagctatattcgaagacttagtcttaactcaagattatcttattgtttgtgatggtcagattgactcaaa  
tcgagtcgaagagtttgagcccttaaaagttggcattcgtatgcatagtaaacagatagtaaaaagccagaagaaaattcgaatcgaagtag  
tcaatttttaaaatttgaaccagcgcgacaaagaggaaatgaagagataatttacttagccctaggaggaaccaggaggttggagaactgc  
tcgaaaaatacccaaatgagagaagcataatgaataggctgattgatattgaacaagcattgacgttttatatgattagcaatcagttgt  
caactttaaagcaaatatcacactatcaaaactaccaatcgaaatgctacctcgtaggccaaaacttaaaattcactactggataatgataa  
cgtttctataaaactacagctccaatttataaggaatataatatttctaccgtgttctaatacaaacagagccaaagtaatataggtttggct  
aaatatggataaattttatgacatgcaaaatttagacagctgtatacaatttaccagaaattttgtctattttttgtgaatgagcaataactt  
aacgttggatagcgggaatgccgttacgtcatgttactttagtttgcgtcatccaactgtgaaaaccagaaacaaactatattagctgacctcaa  
tcttttctcaaaagattgagcttgagcaaaaaccaatttataatattcacaatattcacaatctgtaaaaagacttcaaaaattcaagaattaga  
aagaagctcaaaaaggtagaaaaagatatataaaaaagataaaagagataaaatagtgattcaattgattatgacaatgggataaaatc  
tgaactgacagtagctgctatgacagtcaactgtcatcaagtagatggaccaataaagtcggataacaattcatagaacttgataaatac  
aattagaagctctttatagtttagattgtaggactggaataacataattttctgtatgacagcatccaacctaagccagaacgccttcaa  
atttactgaaccgtgcttatatgtagttatagttgtgtgttttcttcttttctcaagttatcttggttttattgttaggggttaatgagaaggt  
attagttgatagcgtcacaattttataaatttctagtaattccgacgtttccatgtttttggctcttttaagataagaattcatgttttttaggtaa  
tttagtgagctgccagtttagtttcttcttagcatttttataggtgctgtctgaacgctaccttctttcaatcataagaatgcaaatgaattc  
tactttaccacaaatgtccagcggatctctgatccggaatggaaattaaagaatatttaacgaaagatgctttaaacttattgaagatgggag  
aggagctgcatattttgtccagagggtacactccattactgttccatgtctcagacctgtcttttgatagctatggttagcacagacaccac  
aattgtcatctataaattagaaaactgcagagttccagggtacataatgaaaaacatacgaagcagaacatgctccaagagcgcgcgacc  
accaatgctttcattctaccgtaaagaaaagcaatctttactatccgaaaccaatcctggaatgaccgaatgctgaagtttcaaatggttgg  
tcagctttggaaggaggaatctaaggaagcaagatgaaatactttaaagatgcaagatttataaaaaccgaacagaaaaactatatccaaac  
tacaatatcagccaagaactaggaatctaagaattttaaagtaataagctataataacatttattttagcggcttaattttcatgagta  
cccagtaatccaagtaagacctaatagacctgtagacgaacgtcctataaccaggtgtgcaacagaggatagctattatctaataaaattata  
tttcatcccctaaatcttaattagcgaatgagaattgaggtgacattgcatgagacgttttgaagtcaggtcatgccgggtgaagtgcgataggg  
ttcttcatgtcaaaatacatgcatccagtgcccaattctataaaacatgctgtcttttcttctgttgatatactacaaaaattttttcggga  
aaacaaatgtataggcttctctattgtttatgtcttcttccatcgggaatgttgcaaaaacacaaaatgttgcacacgcttttagcatcttt  
aatacacattaatgtaagtagttgagcacttttagggccagtaatgtccgtgtttgtatttttgaaggcgaagaaagtaacctcgagaaa  
aagcgaagcttctcgttttttgcatttttgtttttatttttctttatttataaaaaaatttgagctcatttgccttctcagcatatctatcatt

taattgatgacaagatactgatcttttcacggtgttttaatttttttagaaataaaaaatcaactaaatatttaaaaattagtttgtagtcaat  
gcttacctgggagatagagtaaattgagcaaaggtgggattgacctcataatgtaacatcatattttacctaaaggagcaagaaaaacatt  
ttttactaaaataaataaaaatagaaactaattgatgttggctgggctgtaagactacatatggggcttctcaaacttttcaaaatatttt  
acaacattcagggaaaaacaggtaaaaacaatagcaatagacaaaataacatggaaacgaacgacataaaacaatagaaaagcctata  
cattgttttcgaaaaaaaatttttgattcccaacaagcaaaaaatggacgagaaaaatctaataagaatcggcctaataagactactgtataa  
ttgatgtacaaagatttaaaaaaaacgggtatattactgtctattcttgagtagttggtagtaacgtcgtcggttggaaaaccaattacgc  
aattggtttctcgttaaaccgggttcaaggcataattggtagtattctgaaggtgtaggataaggattatcaacatgaagtaatgacagcgc  
aataagccttaatacagctggacaggtgttctagatgtcactaaggacgtccactcgttacttatgtgaatgcaattcagtagcattggtt  
aagaactgaacaggtaaactgaagtttagagcgttctgttaacattttcgcgtattttaacattgcagatgtgttaattgattccaatatttaa  
agcattcaagaatatactttccgggacgtttaaactcaacaagtagtccgtacgcgtgttttaattgttcaatacaaatccaaatctttcataa  
ttgattgtaacaaatttcgcagtaaaagtatttaaaaagagatcaattctttcatattgtcaattgtattaattctagcttcagtagcagatgttg  
ggtaacctaaagtacagagaacaaagaaaaggaggcaccatacagctataaagggccagggaacccaccatctcaaaactttaaatga  
atccaactaaaaaacaggtgttaccagttcactccttcaactatttaagacaagaaaaaacggaattcaatcaaatcaaa  
gaacggtttttttttcggagccgattcacaacttttaaaatcatcaggagactggggcgggtgatctgctaaatgctcaaatatagcgtt  
cattacctcagaatgttaaatcagcatggtcacaacagcagaattaagtcaatatcaggacgtcggaaacaaatagcaacgttagaaaaat  
catccttacctctggcataaagaacacaactataaactacatataagcacggttcagtaaatgggaaggcgttctggctattaggttggg  
tgctgtgcatacagaaaaattatgttattccagctcctacaatctaaactataaaagacttcaattgtatattatcaagttctatgaattgtatcc  
gactttattggccatctactgtagacaagttgactgtcatagcagcactactgtcagttcagattttatcccattgtcataatcaattgaatgac  
tattatatactttatattttttatatactttttctaccttttgagcttcttcaattcttgaatttttgaagtctttcataggttgaatattatgt  
aaattaattggttttgtcaagctcaatcttttgagaaagattgaggtcagtaataatagtttctggtttctactgttgatgacgcaact  
caagtaacatgacgtaacggcattccgcgtataccaacgttaagttactgccatgcataagaatattagcatgtagatacggattgttttgag  
ttgcttcaatcattaactcaaacggtcaaacgatggtatgaaatccgttttttatggaatgaaacattggtcataagatagtaattcattttc  
aacagtaattttggatttttaagcattctcaatatgaatagctcacctgaagaccagttggtactggcctccaaggggatacattagaatgaa  
tgatacgaacttttcaggaataccatgggatattccactgtgtcttctgaattgtatgttctctggttttctgacttatagtttagtttagatg  
gtttgcaagctagctgtgaacttttgcgttcaacggttactgataaggtgatacaccactataaaagtgacttaaaagcattacattattgttt  
ctcatagcaaccgttacattaacaggttaactaggagcttcttacttaacactcactattaataagaaaaacgctagttggaagaggct  
attactcttagatgttttgaagattaaaagtaaggtctggtgtctcattgtatagttggataatagatcagaacaaacgacaggggagctctgt  
taaatatttgaatgagcagtagacgagcattctcagcaaatcagggatataatgaaagaaacatgtatcgcatcaagtacgaaactcctttat  
acctatctaaactaaataatccgcgaggtatgtattacgtaactaagaaagtaaacgggatacgttaatgtgtaaatattcagtttcttta  
agatagctctttgatatttagcttggtagagaccatctaccgacaaaattatcgtttgagttcccatagatgctggttattgcttataa  
cccagaccagtttgaagtttcttctaaagttgatgtgaaataactattctactcattcgtattggcctttgtaatgaatgcttagcatctggtgtt  
ttgtgaactttgattgatgacaaatcatatttgacaaactgaaagttggcaagtagtctgtataatcttctctgattacagtttttgactttt  
taaattgatgaaacagcctagatcatataaataatctatacaactcggaaattacgggtcccgtagccgttcttcaactaagacaaaata  
aataaaaattgataatgctactttgtagacctatagataacactgattaaattataaataaacctaaaagactgcttctgaacaaaatattg  
actgataattttaattgattgagcttattaactttatcgatacttacagcaggcgtgaataagtgaaccaagatgaacgtagaacatcagtaaa  
aggaaagcagattcaatatactcagaggagcttataaataaggagtgaggagtaaacattcttagacatcattatcaattgagcctgtttc  
gaccaagttgtctcgggtgggaacgacagctcctgggctaattggtcttaatgcttgttcaatgacttgccttaagtaactaggtggttaaaacgcat  
aaaatggatttgaggattgggtgaagtagtaaaagcattatattagtttactctgtctcaacctctacgtaggaaaggaataacgaaggactaa  
aacgaaaacgtagttcaaaaggcagtaaaactgaaaatttaggctagctagaataaaattgtaaggcacaagaaaaacatcgtggacagttt  
cggctgcctaaccgggtctcaaacgactaaaaggattgacaaaataacgatagcttattaagttacttttaagattcttcttagaagttcca  
ccttatctaaagactccactccatactcaggccgtcaatatacgattgaaagactaatgcatctatggcctcataccaattgtctatattaa  
gatcttgaagctatattacgcttaaaattgacaaagactgcaggtccttagagaggtcactaagatcttcaaggtcacaagcaatttagaa  
gccatcaattttatgaaacgttggtatcgcttcatcctttgaatgcttatccacaggtggccctattctgtaaaaatggacaactaaaatcttccat  
ataagaatgcaacagcaattcaaaaataagaaagagtgaaatacgcgtgaactcatctgcagaactattacaggaccctacggatataatgagttc  
caaaaacaaggagttataaaaaaagaaaaatttatgcacaaaagaaaaagcacaaggcaggtcaaggaagaaatgtcgaattttgctc  
gcattattcgtcaataaccgaggaagaaacaggttaagtagataaataaactagaagccctgaaatgcgataataaaacaaaggctcatat  
aagctgccaatatcgaattgttagcttagcagagctagggttttaccatacaaggttgacttaatatcatcagctgttattaattaaggcaat  
aagcataagaaaaacacttatgaagaatgatataataaagacattcggactgaacctagaacccggtaaatctcagcagattcattaac



aaactgttattacctttctttaagtcacctattccaggagcagataaaaagttgtaacatttaagcgagcatagtaacttaagatcaacattcatc  
aaaacctgaatgaatactcgctcaagattgtaacaaattggccgatgagctataattataataatttaagatccattatcaaatggccaaaagacg  
ggctagcaaatgtctgtttcgcataatacaaaactaagtaattgaatctcattttaagcacgaatattatcgaagatttgagcaagaatactc  
acgacgcaaggaatcacagatcatagatgggagagaagtagtattttcaggcttcatcaagtttcgtttaacaggaattgggtgtaattgt  
ctgacaattagaaaggcagctgattagacataaaaagtaatgaggaaaattgtgatattaatcaacgactataacacgaaatcatcgacggta  
taactattactccaccaacgttagagcaggctttgcgcatccttctgtgagttataattatacattatctgaagttaccgatctcacaattaaaa  
cgaatatttgctttggatcgctagggtaggttaacgaatgtagtaacgatcacaggaacaaataccagatattttaataaaaaaaatcatct  
tgtcctatggatattcaacggacctttcttttctaataatgagagagcacacgaaaggttataggatgtgcaactgctagctgaacaagga  
tattgtgcaatataatttgagcatctgaacaaaacgaatggataatatacgaataacgataacaaaagaaagtcctcatcagagtctacac  
cagactactatatttttagtccaacatagtaaagggtaggtctcctgcaaaagtataaaacagaaacaagttatcagttttacataaggaa  
aatacttaaattagctgttcaaaagcgtattcagctagtttccatgcatccgaattagaactataccaaaactgtcattactttcaacatttaa  
ggaaaccttaagaaaacatttcgaaatgagacgtacaatcataattcccattacaagatataatgaactcctttaagcaaaactttactcca  
aactgcgaattttcataatcatctgatgtaaaggtataaaaagatttcttgctgtaagaacaagattcctgaatcaaacgaagtgttaggac  
attaggaagagttagaggattgttactcaatgtccataacatgattaaatatttataatgttacctaaacgaaggcaaaaacaatagatgctac  
tttatagactataactaaacaacggattaaatcactaaaatcacctaaaagacagcttctgcacaatgattctgatgtttgagttcattaact  
atttatagatactcacagtagtaagcagacgtactgaaacttttccgtaacaaattatgtaccaactaggatttttactaaccttaacttagtata  
caatgaccgggtgcttattcagttcacacttataaagtaatctcagcattctcggcttgacaatttctgtaaaactgttctgtctattatgcattgtg  
atgattctgaggtgtggttatttaacgtaataatagtttatatgttttaaacggctaagctagtaaaacaactagtgtaaacagtttataataat  
taaagattaagttatataatttaataataaattgggtaatagaaaataggtatagataatcagataacaagcaatgctgtctcgttttataa  
aggaaacaaaataaaaatgtaaaaaaaacatggacaaaactcggatttctgacgtcaattatctccgaaatcgcggaacatttctgtata  
gtaaaataccttccattataaaaatcttcttcgagtaattatctgcaataaattatagtagtatcctattttgataatgtagccttccgaaagc  
catatctattactttactacacttctgcggagaaaactttaaaagcacaaaattaatttaacaccttcttcttctgtgttaagaaaaatagag  
ttaaacgtttatgataaaggttacttatgatttacgatttacgtaacgtttcaaatgttgcaagtaattttgtaaaactaaagctatttacttaa  
actatcaatcaataatttttaattatcactgtccatctgctgtaatatgatgtctttaacttttatagtagcaatgcattaaacagggtaactgct  
gtaagttatataaactgtatagcttatgtaataagcacttaacaaaagttgtgtcagatattgaaataaagtatctagattctaaccaccatt  
ccacctcgggtaaaaaatcattctatcatttaagcttaagtttctaaaagtgaccgcttctaaaaggtcggatlttagtaactgaaaaagatt  
aatcataacctgaaaaacaacgttaatttgaaggtgaaaataaacgaagtaccagcattccataactatcttaactatcaagataacca  
tggatttgtaaaggactgtgttatttaaggcgcaaatagcttagagtcagaaaaataagcaattattagtgatattaggcggtagatagta  
acacactgtgcaagcaagcactgtactgacggacaaaacagttgaaaacactgaattataaaactttgaaggaaacattagattaattgagg  
ctagtatacgtaacggcgaatctccactttatttaagcctactatgataattcattttctaaatataataactcactgttaatgcagatgata  
tgcatttccattgaatagtggttttacttcaatltttggcgctaataaccgattaacggttccatagaaaaacgaaaagaatttaacataatcctt  
attctgacgaggttgcttataacaataatgacaatgaccttaacaagttctagaatacgttcaatgtgttatctcggtagcagtaacttttctgtt  
ttagtgtaatagtaaaagtttttggagctttatttcaaaatatacaagttattttagaagggtggatgtaacgcttattaagccttactttatgtact  
atgaaaacagtttccaaggtaaatlttctacgttgaataatgattaaatcctttctgataaacaccaagtgaaaaccttagaaacaatctata  
tagtcattgatagttaatgaggttttaaatcattttctgtcgatataattatataaatttggcagtagtattcaacgtcattctttactacgtttca  
ctattccagctttaagtttcaaaatgttagcatgaacgatgaagtagctagtagaaaaatggatacataaaaatctaaaacgatcaaaatcct  
tattttgcatcttataagagatttagcaggaagtcatacgtgctgttaggtaggtattttggtaaaccaaggggatctctgttaggaaggt  
acaatttgaagacataattaattatctatatactagctttagtaggaaaagacgatctttatctctatttttctaaaaggttagtaggacgcctt  
atttccatataaatttcttatgaaataactcttaactttcaagcttgaatctgaattattctggcacgtagttagttttagtttgaattgaag  
taaaactttgtctgtcgtaggtacttttactcgtatagaagtaactgctcaataattagatcgttcaacatcaggtggtgactaaagcaacagt  
ttatggtaggtaacaaatcagtaggacgacaatagaaaaataatcaataccgacgattgtatgtaattcttgtttgaaactacaactgtatattat  
ttttggcaagcgagttcatattaagatagtgatgaatcatagtaaccaataagataatcgcagtaagggtataaatagtagttatgattcactt  
ataataaatttgccttagtacggaatgactggatttgcgtagaacgctataggttatagtaatagacttctccttataacgttaatca  
tagtaaagaggtatacctcattgtctggcgaaattcaatttttgattttttgtagagaatagttttttactttttgaaactattttctgtaaaaa  
taactactaattataactgtcactaattactttgctaaaaaaaagcttatataagggtaaaaatgatctcacaacgatacacatatttgggt  
ttttgaatgtgtgagtaaaaaacattaatggattagacacgtagtaacagcagctagcaacaattatggttatttataatcgtactgagg  
ctttctgctgaagcaatgattaggccaattttgacagcgtacacaactttatctttagtttaattgcttctctgattgggtttgaggtagactt  
atggatttttctcatcaaccatacctgatttgaacccatcagagacaacaacgcttcaaacctgctatttcaaacactggataagttctt

gctgtgtaaaccattcggatgaccaataccatgttctgtacagaattccgctggcatgttctcgtgaaaactccagcgctttcaaaaagtccac  
tacatagacgacctgaggatttaaacagctttcaatttctagtgataaaatccacatctgtcatgtggtgataagccattgaacagacagca  
acatcatactttccaacaactcgatcgctaggttctgttctgatctcaaatccacatgttcagcatgtgcctttctatcggaacgtttagggtctga  
aactgtgattgaatattcaaccattgcttctgagatctcgagtcgaaggatactttcacagtagggcgccaaatttcgcctaatcaaacgattc  
cgcatgcaaaatcaagcaagctaatggatttagctccaaaatttatcaactttagtaaaagcctcattaagatcaactgaatcttactatattg  
ctcatataaattttatccgtttcgacaacacgactcgccgatccagtggggagttgcaaaatcttccggcaacaattttgcactgccaatgtac  
taggattgtcactcatgtgctttttggcgttaaaataagttacattcaagtcagtaagattaggcattttcagggttctaatagttggatattc  
atataggataaaatgaatattgataatcgccgttataaggaatgaaaactctagctaaattagttgatttagctatcaccaactccagaaa  
gtactactcgttgggcaagccaagcatatcaacgttatggatagaacctcattaaaacgtcaaatcccttcaagaatatcatagtacgcatt  
aaacatctatttatcaaaaattgcaagacaaaagagtttaggaagggtattttttagagtttcttcttattcttatttatcagattgaaag  
tgccttttaacatgctgaattttttactgcaatgaacataattgagctagtgatatttccggccttcatctattaccaatttctacgtagatt  
gaaccttctaagaaggttagtttatgatagcagcgggacgcatgttgaaccaactctttatagatgctgctgatgcaaaaagacagtggttaaat  
taaaattgaaggaagaactcgtgcaagccaacaaaagatcgttatggaaagtgaatctgaatggaattaccaatgctgatcaaatcaa  
gctcattgcatgtgacgttgacggaacattgttagacgcaacaataaatttataaacgaaacctcgagcttacaatattacgaaaaagat  
atcctgagttacctattgtcctagctacaggccgacaacgttcttctgcaatagatccgagaacctggaattggacgtattcccattgattcat  
ctaaatgggtgtgattatacaagggtgaaatcctttctcaagtagggctttcaaaagaattgggtactccatattttctgatgcaagaata  
tgaactaccgctatcttctttatgaccacaacaaggtgtatctgctgaaaaatgattttgaaagtggttagcattaaatttgacaggatgctggt  
gaggacatcgattggcgaagccagttgataccatcttggaaacaggtcatttctaataagttaccagtaaccaaattggcaatttatgaaaggaa  
ccctgaacgattaatgaaattcgaatgcaactcctgaaggacaatcagaaagaatatactctcaccagagatgctctttgtactcgaagttatt  
ccctcttctgtaaacaggcgaccggcttaacaaacattttgaccaaagttaccctaataattcaccgaatgaggttttaagctttggcgatgctc  
aaaatgatgcttctgtattgatattactggatactcagtcgcatctgtaattggcatgctgctgctataaaagcagcaaatgatatctctgctt  
ccaaatcatgaaggtgagtcggcgaagtgttagaacgcatttacagaatccctcacaatcactaaatctaactgcttctgattgaaaagtaaga  
aaagctattattgacttttattcgtgaattataggttattaaccattttaagcaaaacacaaaagatttatattatcataatcagcttttagctc  
tgttttgacgctgctactactaagaattaactacaagttatgttttctgtattcacgcgttatacctaacaaaaataaaaaacaattaggaa  
ttttataatcagccaatgtgttattataaatgtataaagtaaaagcaaaaatctatcatgaataaacttttccatcccagtttaagatgaaa  
aacagtttaagcattattccaagataaaaagttcataacatagaacgatagattagaaattggcaaccaatttataaccatcattcaaattc  
ttcataatgctggaagatcggatcccatcttctgctggaaaccaagtccttttcaactcttcaaaaaagtagcagatccgcatgagttatt  
gcaactgttttagtataagataaaatcaaggtagtcctttatgttttctagattaggtttccatcacaactgaaatcattttgaaccattcgac  
tgagacaataattgctcttccaccgatagcttgcggcagatgacagtagatgacacagacctgactttgattaaagaatcttctaaagttc  
tctgaaagagcctaagtaacttaatgatctactagaccacacgaaagtgagatgaacgtattaccaggcttataaggagatcccttaata  
ggtaaggataagtaatgccgacaccgacgagcaaaaaacataagaataatcctaaaggggttgaaactgggtccgtaaggtccatcca  
gtaggacagtcattttctagctgctactgagtagatcagattcataaaaagttgactattgacgctagatgattcctggccaggcgttaattcaga  
aacaacgacatcagcattggtattgacttagcttttctgtcacttgccgtaactttatggaactcaaatgggtggccaaccgatgagtaa  
atcctttcgaacggcaactaaaagctctatatactgctcgaaggacagctagcaagcgtgaaggggtgaatctccagaaactaaaccgagg  
aatgttgataaaactgatttctgaagaccacggcaagaaaaaaagagactttgggttttttccgcgagataaataacgcctctctat  
aatactcattcaaaaattggctctattgatgaagcttcgagcattctacatccacgatcgaatacacaagcaatagctgccttcatataagg  
aatgcatcgggatgataagatatacatattataagccaatgctacacgcatgatgaagaataaagaaccattcataaaacctgcctcgg  
aaaaacggtagggcactgataatcatcacaaccattatcccagaataccatattcattgaatacaggccttactaaaacactgcctctatg  
agcatctataccaatgtagataaaacctgtataacaccaagcataatggcgaattgagataagcgacgatggacataattcatctttcatgtg  
agggtgaaaagcatcaagcaaatggatttttttagactgaaaaaataggatataacgtaaagagcgggtgctagaaagccgatctagacc  
tacagatgatacattccagctgcctttagccgttttagggcgtctctttccgatgaaaggaacagaaattgcaaaaacgatgggaacagcga  
ccaggttaagataactttgtgggtgttaatacaataaatgtttctatcgtctaaatataatgcttccagaggattgaattggccttacgagaa  
acatcagcttgaagattgagtttaaccctgtctctataacataaaagaccagagagagcaattaagcaccataattaagcatatggca  
atgactgccattttgtatgagaacgaagcatgattaccaatattgatattgatcctgtgataaccaaaaccaaggtattgaaggaagcctct  
ggccttttaaacgcttcttcaagcgttgaagaaaaaaagggtccaatccacatgttaataacttttctctctcaaaaagaggcattttc  
taggaatattttcgacattgtcatttttctccacaatagtatatcaatgaccagttaggtttatcagatgaaccattgtccgctttgagattga  
aaattatcagatgagccggaactttatccgataatccggcgtgtggatttcggttaaccatggaacttactcagtgactaaaaaaaataac  
gctttgtaatacaagaacatataagcaatctgatgattgtatagccgatcaacagaatgcaaaaacagacaattgcgttttttatct

gatcattttaagtaactgaataagtaattgaacgaaagaagtaaggtgcgaaaatcaaactgccgtgatcgaggaaaagttcatacgattt  
tcatgtcaattcaaaaaggtcagtgctgtttgcattgatgaaaagtggtcaaagcgttcaatacactatattaaagaaaatatccttgagtcgta  
gactaagttacaacgtaacccccagggttcggtcaatagacaatcatcgtcgataattttagatctattaaaatcaatgaaggaaagaaggtg  
tgaggctacgcaaaaagattgacagttttgtcaacaagtgaatggaaatgtaacaagaaaagagactgctttattataaaaagagcaagt  
ccgtgacaaataaagaatcacagtaaccaggtcagtcataataaagaatcattagatagcgttgatcactttttttgtagcaaggaaagaaa  
tgtagataaaaaatccacaaaaaattcaaaaaatagacaaatggataataatcttaattacgcctgaactcaaaaaatttccactaa  
ggaagttacggccaaggctaaaacgccccaaaacggtgactctgaatatactcgcattttgttagcacctccaatgtgagcgcgaccaatccca  
ggaatgcgaggaaaaacaaagttgaaaaagtcagaattatgtaacatgttctacaggacttaaaagagcggttatcaaaggtaaaattgcacc  
tgctgaaaatgctgcagcggacgaaacggatgcttgaatggtttgtacggaatacatgttgatgccaactcgtcagagcatgacctctaa  
agcatcgtgctccattagcttgatggcgactgtgctgtaagcctgtctaaacctctagtaacatagacatgagttactcgtccacctctcat  
cccaatgttgtccacctctgtctctcaaatataatccgcatctctaaatctgcctgagaactaacagaacatattcgccagcagccatgga  
catggcgccagcaattaaaccgaaacccctgctaaggtgatgcttcgagaggcttcagctgatgatattccaatcaataaacagataaaa  
gataaaataccatcgtttgcacctagaactgcagctcttaaccagccgacactgcatcgcattccttggtttagttgaagccaagcaa  
acattgtagctatagatgatcgaattcaagcaataatgttatttttagaaaactaagataatagtttcttacagtaaacagctttgagtgctt  
tgtaaaaaataagcaagatgctgcaagttgaggttgaaaatcgccgctcaaatgtttatgacttgattgaaggtctaaaattggctataatc  
gctctcttttaaaagttgactcgtatataatgtaactgaagagggttagaaaatgactattggttggcctgtaacaaaaggaggattgggt  
acttttaatttttcgaaaaaggttattgaaaattcattgtttgttacttacagctagatagcttcgagcttcttactgtgcaagtgataaatcat  
tgttacagggatgaaatgttgaaccgggtttggaacaaacgagtaaacatcaataaatcatcatttgccttatgctcctttctaatggaagaag  
gagacaaaaaaaactaagttgtcttcaaatattgttattataatattgattatgattgtttcgagtttcttcgggtgctgttcttctaaa  
tagcaagaagtgatcatgtgtaagcatatattgatggctatctaattcaatgacggcatcttaaatcctgagaaccaccgccaatcatcctt  
gtactgtgagaataagctcaagaccagtaataaaaacatgcttccgagatcaagttacgtgacggccatagttgttcagttctatataac  
acacattttattaacgtagttcgtttaacaacaactctgtaagacactgtgtagcattacaccagttcccgtattcgaaaaacaaatcatgaaa  
ttattcgtcactggaatagtagcggacgtagggaagacaattgtatcgtccattctcgtagaatccctacaagctgattactggaaccgattcaat  
cgggggatttagaaaattcggattccataaactcaaaagactgatcagtaactcaaaaactcatattcacccaaatagttatgcctaaataca  
ccagctagtcctcatgttgacgcaaaaactgaccaagttacaattgatgtaaacctattgttacgccaggaactgaaaatcctcatatggttattg  
aaggtgcagggagggtttgtactttgaaatgataagacatgatcattgatataattcaacaagattataaagttgttatagtgcaagaact  
attaggaagcatcaatcacactttgtgaccattgaagctcttcggaacagaaatattccatcgcggaaatcgtatttagtgaaccgaaaatc  
ctgaaaccgaaaactggattttacaatattcaactccttgtattggcgagtaaacgaagaaaattattttgataggctgcaatctccaaata  
tgccgacttgttcgtcccaacataatgaccctatgagggtgcttcgagaggactctttaaataacctttacatagctactttataaaaagaaagt  
acaagaaagattagaatataagagtacgtcaaaaactacaactgtttcattgtatcaaatattgtcctttctacttaactttcattttcattatc  
aaattatctgcaataaaaagttatacaaatgaattggtgaaaaagacttgaataacatctggcaccatacactcaacacaaaacagcaaa  
gcctccatcgttattgtcaaaggaaggagctttattatgggatgaaaatggaaaagaatataatcgtatccattgcttcatggtgggtgaaacc  
gttcggccatagcaataaatacattgcagaccaataatacaacaattaacaagcttagagcatgtttgcttggagggtttacacaccgcctgc  
gattacgctggcggacgactgtatctattttgccaggaatcaaagcaaaggtttttctcagacaatggttctacttctgtgaagtggtatta  
aagcagctcgtcaattttctacaataaaaatgaaaagcgaacaaccattgtagcttcgaggacgcaattcatggtgatacctttgccgcatgg  
ctgcaagtggaatttcattttatacttttagcttccaaggaatgttcatcgtatggttacgcttctgtgctgttccaggaaaagaggaagaaag  
ctacgaagctcttgaaaaatcctactgaacataagtgctgcttttatattgaggtttgatccaaggtgctggaggcatgaaaatgtatgag  
cctgaatgctggacagactcattgaaatctgtcaaaagcatcaagtttgaccatcgtgatgaggttatgaccggttcggaagaacgggaaa  
gttgtttggttgattatcaaaaaatcaacctgatgttctatgcttatcaaagcttaacggctggtacgattcccattggctataaccacgttttc  
ccaaaacgttttcgatggcttctacagcgacgacataaacaaggctctttccatggtcacacttttactggaaacctaccggatgctgctggca  
atggcaagtttgattgttattgtccgaagaaatgcagaataatatttctgcattcatcgcagtcatttagaattccagaacgtcttcaatccca  
tccacgtgtacacacaattcgtgtacgtggtgttatccttgcactcgaggttcatcccagcgtcaggaaagctattacggtaaccttagaacaat  
ttatatgactatttcttaagaatggagttatgctacgtcctattggaacattgtttacatctactcctctatattactcaagagcaattggat  
attgtttattctaataagaaaaggctttagaagaagtagtataagttttgtcacttaaaacttatacaagagatcaagtgctcaataaataagtcg  
aatcgtgaaaaattgtttataccttggattagtaaatcctctactttaattattgataataagtatcaaaaattgactttgcttcaaatcgc  
taatatatgaagcaatcatcatcccctacagttatggttaaattcagatataggcatggaaggaatggtgaagtgtaaggcttcttaatttca  
atccttttttaacaacataaaaataaaatcgtaaatcaccgaaatcagagaataaatgcctcttatttccagggttgacttaatacagattat  
gaaacaacagcatgggtgaaagtaactgcattcctttactctcgaattgttactttactaaaaatggaatggttcttcgcaatgacaata

cgacacaaatgtactacaacagaaagtatcttccatcatcctacaaaagatgaaaccgcttctctaaagttagtaacatttaataataattagta  
gagagttttcttgaacaacgataagtttccagtaagaacgactgtaaagccgattataaaactacaaattttataatcttggaaaaggttat  
aaataaaagcaggtctttaaagacctgctttgactacgtaactgaagccatcaattatcataaatctcgtagagtattaaccttaatgaa  
catatcttggcggtgtaaattactgaacaaatatagaaactgtagatagagtcgaagtttcttctatctaaagggttccagcttatgac  
attattgactacttttagtccttaattatgaagtaaaaattaccctccacgaattgacattgacatcgcttgtaacaggaatacagagaccaa  
agtagggctgcttcatatcatcaaacacatacaacctaatcgcttcattttccgtagtgatatctcggaatctgggtctactttatgatgtaaaa  
atgacttctactatattatggccacgcttgatgatgacacttgtaacaaaattccactgcaatatactgacgtatagaaagttccgctctggaata  
aataatataaaaacgacattcgctgaaaaggcatagcacacagctgtacacgttgaaatacttcagattactgcatcgacgtatcaaggat  
tataacattaaaagatgaatgaaatacgaataaccgctaccaactgatggataaaaattgggtcgaatcccgttcagaacgtacggcca  
accagttcaggatccatcaggtgcaacctgaaagctgttgttttgatggttctaaaagcgtcaaaattcagcaagtagcgaacaaacaataa  
ctcaccgaaagatgtgattataaaacaaccgctgtaccatctgctcaggctctgattccacatgtttctgggtgaaattccgggtattgataa  
aggcgtgttctggctgatgactgtggcatagttgctgaacggtccggagggtgaaggatttattgtaggcgatagagtagttatcgcttc  
gatattgctgtggatcctgctgttctgtaaacgacgcaattcgtcgttgacactacaaatgacagtaagattatggatgtcaactacggtg  
cacatcactctgcaatcttggctataccaagcagctgggagatgtccaggctgtcaggctgagtatcccggttcccttggcagctcaattg  
ctaaagctcccagaagatattcccgatataaagttgtatgtcagatgtattatgtacctcctgacgcatgtgagctcgggaatgttaa  
gaaggaaatacagttgcaattggggaatgggccccatcgattgttcgaggtcgtgggtcaactataggtgcaaaacgtgtcattggcatt  
gaatccgttctgaacgcatcaaaatcgcttctcgcgtttgggttgaagttattaaccgaaatgaagttaaagatgttccgaagaagattctta  
gcatgattcctaacggaccagacgtcgaattgatgcaactggctccgatttaacaatccatgcttcaaaaggtagagcgtgctgtaggttgg  
aaacagattcatcgatgtattactgaatgcttcaaaagttcgaaaaataggaatgtctccatcattgcagactatgtgggaactagcaatc  
agttccctattggacatcatgatgaaacatcaacggttctgttctggcaatgtccttgccagaactattttgatcgagtttagaagcttaaga  
tccggaagattaatccagaatggatgatcacacataaagtaagttgacgaactccggatgcttatgggaaattgtttacaaaaagatgg  
ttatctcaaagtttctgtgaattgaagacggtagatacacttttaaattagtagtataggatcaatgattttatgaatgaatgattttcaa  
aaacaaaaacaaaaaaattaagtagataatattgtaattttgaaaacgaaatagatgataaaaccttttatctgattatgctctttatatt  
atggtaacaaatggcattaccagttgaatcaaaggagacaattagcattcttgaatgtccactatctgaaatgtgatgattgtttgtccactgtctc  
ttagatcatcttggaaaagactcctgtagatcccttttcttttgtagatctctatgtcgtacttttctgtccgaacctcgtccggattaaaa  
aaaagacatgaatcttcttggtaaaaaagttctgttccataattcaataaacccccgaaccacaggaacggacattatcaacgtattttc  
aatgtagtagctgataatgaatcgagaaactcaagggatactaaacctacaagactaccagatcctagaagagcaactcactaaaggaacat  
gccatgtttatctgtagtaaacgacttcaatcttcatcgtaaacatcatgcttcgaaaggtcatctggaaaatagaccaagggaagcctttg  
tgactccgagctccgagaatggacacaaataggtgggaattgtgcatataaagccttttagaagctggttcgaaaacgatatcggtaaacc  
aatgttctgcttctgctttaaagcattgataattccatgaaacatattacataaacattcgtagtaaatgaattgtattgagatagcttct  
catcagcttctgttacattctgatagacggcgtaaaaatcgatattgtacaaggaccttccatttccgactgttatggctttataccctgaatt  
cttcaggtacatttcttggttcattttcttttagattactcgggacccattgaagttatgattcgtttgctacatgtagagcgaatgtacctgtc  
tgcttgtagctatggctattggctaaaggcaagaacaaaccaagctactcgtaaaattagtgtaagctaaaagcactcacttttcttctttt  
aattatattttctagaatccatttctatagattaaatcataaaaatcattatctgcaagaaaacaatgtgtataagttagctattgaagatta  
atatacaatctttatattttgtcattaaacgtgaaaatgcccttcaaagatctgaaagtaatgatcgtatagttcaatattagttccactatcat  
aaaatgttagtaagatccttgtaccttaaaactttgtcgaataaacatacatattggcatggataagccttaataaccgcaaggtcatatgaa  
gaatggcttgtgtttgctatataagtagaccggcatcattgcttccatctcgtataataattgccgcatcttgaatgtatgtgatactttgtgagcg  
gtagttttgtaaaatcaacttagtgctttgttatccttgaatacccaaaagctccataaaatgagagcagcaatgtaaaacgaccagggataa  
tagagaagagtagtaaacggtgctttgattaaatcctcgtgaagcatcattccatcacatcaatgatgacagatggatattttagcattct  
cagtttccgcaaaagatttatgtattttattggaacactacatttcatagattcgaattccttgacttggcggaaatagagttagcgtacgattga  
atataagtagcttagtctttagtaaaaagctccagatgataaagtgcaaaacattccttgacaaacggatgcttggctggaaggttccagtt  
tgaatgaattctcatggaactttaaataaccggtttataagttcgtatattatattgaccaattatcaatctcagtttctcagttcagtcctg  
gaactacacaaaagttagaagacatcctcatagagctatgataccgaaacttctgttttacagaaacatcaacagataccaaacatgtaa  
aatcaatgatgttccaagggatacagtaaatgatattcttcttgaataaaggcttccagcatatgtaaaattgttggcggttcgtctagtg  
gcttttaggttccagacctcaaagtttctgcttccagtgatgttcatcagcaacaatggcaatgaaacatccgttacacatagcaaaggctg  
atttcaaaaaattaacgcatatagcgtccaaggaaaaaacaacaaaaataagactaaacaaaaattagttaataagaattcattgcatatt  
atataccgttgacagactcctggaatccattatgccagtttgcaaagaggaattgaaatcattatcactaaaggttccgagtgaaacagtta  
aagcttcttggatttgcctgacgcaaaagcctgaaaaggttagtcttaattattgttgaagccttactcaattagcacgggatgaaatagttga

gataagcgggtgttggatagtagtactttagcatttcaaaaattgaattagcaacagcatttgatagaccacagaggtataggtggaacaaac  
tcttctttcataaacgaaaagcgaagccttgaatgaattcaatagcaagaagacgatcagtaggattatcgtaaaatgatgcctaacgta  
atcatagctaaaagcaattctaaaggagttgggatatctgaaaagtaacctgtgcaatattggccaacgaatatgaaaaaagaaaaatagg  
cattcacccatacaccaatagactctggagtgacatggctaaataatcagtagatagcatgtgatgagctaaaaataggttattgatcagttcat  
agtggattagttgacatacttcaagtaccccaaaagattcacatgcacaaatgtagggcactttgagctacgtacataggacccttcgaaaac  
ggtagcgttgaatcttaatagtataaaagtccgataactacagtagccgtaaaataataatttaagaatgtcctattcgattaggaaggat  
catcttgattgaaagtggaatcaactgggtgattgaatggagacgaagattcgaatcggtgtcttttctactttaccagaggagaagaaccg  
caaattatcatccatcgttttgcggaactagcaaatgatctatcttcaaaacacatagagagtcgtgaaaagatccaagcgagtgacgcatc  
aggagttgaatccaactggaaaaactctcataggggagaaaatgtagtacgggaattagaaattagagaaggatccatttgggggcatagaa  
ggcggctcttgagtaggggctttcacggtaaatgaagatggaggaggcgacgaaaaaggccaatcgactttaaactacgattcgcatgat  
catggaagaagttagcatcagaattattaactaaaagatcagatttgcacaaagactttcgaaggagaggatggaagatctgggttgaacgat  
agaagaagtagctgagggattcactgtccaggaccacttgaagtgggttgcctgagaagactgcatcatattcgagatactgaacaagat  
ttgggttcacaggaagattgagagaggtattcggtgttatgcatgaaaatccttagaaaaatattgtaggaagaagtagaaggaagcactaa  
aattaaaggttagatcagtgtaatgaagagcgtcaatcgggaaatgtctaaaacactctgtagtctacaaaacattagcaacacaacagggt  
atcctaaaaacagagaccatgtttgagcttccacttccaacatacagtttcataaaggccttgtttgtatagcatttggtagacagggg  
taggacatcgcttctgcaaatgcacgttgacaaaacgagcaagtaaatgttttaatttctgtaattgagtgcatgtaacgttatacgc  
atataaagtagcaaaactacatacaggttcggtcatggcgccgcaaatgttcttctcgtaacgactttgggcaatcaagataagtgaataaaa  
ccttgatctccgatttggtagccgtagcgttcttagaaggtttccgacaaaagaatcctcggtggacattattcttaatcctctttcgtat  
aataccatccaccagatgttggtagaagatgtgggggagaaatcttgggtgctatacctggtatgatcatttgggtgtaagtttcaaa  
aaggaaggagcctgaacaatttactatagattagaagcgcgtatttcttgggttcaatccaataaatacgttaacgcttctgctgtaa  
agagcccaataaggcaataaaaataaaggcgagcaaaacactgcttggcggggaatcgaaccgggctgctcgatggcaacgaagcatta  
taccactaaaccacaaagcaatttataatacaattatataataaagatatataatgtcttttgaagcaagcgaacattcattataatg  
gctgaatatttgcgaatcccggttccattcatcattcatcagcgaatagacaaggactcagtcagtgcatcaggtatcgaacacctgtcctt  
tatggagaacacatttataattccaagcgtatttcttggtaaacaaggcgaaggggttaattctgtagagatttggcattaggggtt  
caatgcattttaatttcttgcctattgagcaatagcgtattgtgtctaaagtttcttagatttgcgtagtgtaagaagtagttatttgccttattt  
gttcaggctggaaaacttttagcgtaaacaaacttttgtatataaaggatctagcggcttttgccttctgcttttgcctttcagctttcca  
agatctatcccttcaagaatcgttctttaaaggtcgttatttgcacacggttgcaggctctgtgagtaattacatccctttaggatttacc  
ttcaagaatcatgacattttagacttatcatctggtctattcaccggttggctttggcccttctggagttggcaaatcaaccttacttaagcgtctt  
ttgtcgtcacagggagacaagctcggtttagtgatctgcatactactagagcccctcgtcctggtagcaagcaggtatagactaccattatgta  
gcaaggatgaatttgaagactagtctctgaaaataagttgtcgaatgggctgagtttccggaatatgtacggtacttccattatggccataa  
aagatctcgaagggaacaaaaaagctatttggacattgattacaggggttttgcaggatgaagaagagtgccattaaggcaggtatgct  
ttttggcacctcccagcttgagcaattagaggctcgttgcgtggctgactgaaagtgaagagtctgttttaatcgctttagaacgtgctttt  
aaagaaatgaatatagcaagagccaggcaactttagggccttattgttaatgatgacctagaaaaggcacaaggagctcaggaattt  
gccttctgattcctaaacgaaaatagaataattatcttgaatcttacctgttttccataaaggagattattttaaagatcgggttgatgggat  
aatttcttgcatacacaaggattgactaattgcctaaaaataatttaatttgggttcttcttctttagtcttctgattttcagtaaacatttta  
ttataaaagcctaaacataataaaacaacaaactaatgaaagcataacgtgatactgggtctttccatattctttatgggagtataaatat  
gactaatgattttcaccttctcaatcgccaactatacattcataacgttttcatccttttcatcctttgagagctgcttctatgaattctagatgga  
atatttcttcttcatctcaattatggccatacggatgccccaaaagcaaaaaagcagacaaaaacgtgagaaatccagcaccacctcgatc  
tgctccgtcgctggaggtacatttacttcatagttttttagtactgtgagttgacagaagcacaatgtagcatttgaacgattgtctgacgaagacgaca  
aggtaacaatgctggatatttgcacataaagcatttgaacagcttctagagcagaaaaactgttgaccgacgccatattgctgctccaagtac  
cattgttcaagaccagtgacaccacaactgctaccactatctcgccagaacaagcaaacggcagcgggtgctgaagttttatcaagga  
tatagtttcttagtataaggagccagacgtatagcatttcaaaactctgcattaatattcctttaaagctgttggcaatgttacatgtgta  
gacgtttcacatttggatcccatgctacgccatctttgtaaaagatgatatagcatgagagataaacctccagttctattcttccatagatcgt  
tcttgagtatggttgatgtagggcgccaccagtcaggtatataacagattataagaccactgagaatgatctatattctgtacagttcgtcga  
acgcttgaacctacatacactaaagtctgtttcattgacgaagcactggatgttgaccagtcctcaaacgcatggaccagcttctcatagag  
gactcgtgagtaaacgggccaatcgggacgcaattgaaatagtaatccattactaataactgcttataagaatagccgctcaaccaaggaa  
acgcttgcacgtaatccaccttgcagtttaccattgtccatctaccagacatgcgattgaacgctgcttggcttaattcaagcaagaagctgt  
tgaactcttactgcttcaatccaactccgcagcatcattgtcgtgtagtacccttcttcaatgaagatttctgtaga

cggctgatagtcgatgactaccagcgttatagagtaaggattcagatactaaatctgtatatgtattattaccaataatatacattgtttagg  
agagcagtcattgatgcaccagtaaccaccaatgatgcgacaaattataatcagaaccattccagtaattcatcagctctccagtcagctg  
cttacagcgtttcgaccgaatctaaatcaacagtaacaaccggttagatgtttatgccagtcactaagaactatggctacttacatcatcatta  
atatccagttgaatagcctgagcttgaaaaaagcaaggtaaatagatataacgtaaaggatagaaaaaaggaatattcatttctaggt  
aatgaccgaagatggaataatacaaacgaaagcaaaagataaactcactgaacaaacagaaaaagtaaatgagaatcgtggtaatttaga  
gaaaatcaaatagacaaaaatcaataacttaacagttattacagctctgtttacctgaattcatggaaatgaccgtaaattctaatatgagctc  
aatttaagaagttgtcaacgaaagtaatgggtatataatctttaatatataaaatcataaattcgttgaataaaattgtttttttatgaataggtg  
cctcaattgctgttttaagaattgcaaaggatggtgaaggcaacaaccaggaaggaagtaacaagtttgcataaaattcgacctccagt  
agattgctgcaataagtaaaagaatatttctcctcaaaatcaaaacaaaaataatagaattattcatttgttttttttaaaaaaaaa  
gagccaagcagtttagaaatcgtagagcataaagtttgaatcggtttgtcagtgagcacagcatgccaaccaacaagtaaaagaaaatga  
taagaatataggcaaatgatgaattatgagagtgatcacgatcgaatgcttatacaattttcgcgagacaaatttcgtttcaactttcgaatg  
aagaacttcatgaaatttaattgaatcataaattgaataaccgtgcatacaacggacactctacatagtagatccaaagggtttcaagcaa  
aattcaacaaaaacaaaacagtaaaaaaggggaaatttgatgtgaaacgaactgcatgtataacataacgtaaatagggtagaa  
aaagatgctcataataaaatgaaaaatgaacgacaaaaaacagtagtaacatcaatagcaatgaaaaaggaatctgagaaaaagaga  
ggcagatagtaagcactgtcaatttcaggaatgattcttgatataaaagaacaacatatagaaaataataggaaaatgagtgaaaagaacgc  
tgtaaaaagcctgccagcctttatcactttctgtggcagcaggaacagaatggttacttgcgtatcttggccgacttggttggtttgagc  
gtgctgtgtcaagagacaaaagagtagtattgaggagtaagactgactggatcacctccaatgccgaaagctgttaccgagcccata  
attattatccatgtaccattgttcaagtccacctgtttccaagtgcagcatcataaccaccactacaagccttagcagcagctttggcgctt  
gcatggagataggacatgattgttctcaggtgatggagcaagctgcatggtataactaagataacgagcaagcatacctttaaagcggtttg  
gtcatagttgcaagagttgagctcacaagaaggctcgtaaataattttatcttcattgaaaaagtggtcagtgaaacgattcagaagtcgctc  
aagtggtcttccattcagaagttcatttgtgaattgtacagaaggcggtaccgcaaggttagacacctgtgtataggaccattgttctttgt  
aacagtgtcaaatgaaagcagtggttgaccatcatatactgcatatgaatccaagtcgacaaaaccgacgcctacggaccaatcccagactt  
ttcgcccaagccacgtaggtatcattgtcgtgtagcgggcaaggcgagcgaattggaaaagagcgcattactgatggatttttgtatg  
cgtatccttggttaaattgataaatttgccaacgaatgccaccattacaagtagaattatcccatcgagatgacatttctcagcactgctgtgc  
aaggcagcccacgatgttccgtttcattatcattaaattgatctcagctgctgacattccggtcaagcccaaatgcctgatgctcgttaccg  
aggtaaaacttctcgtgtttggggcgaatcatttttaccctgttcgcaaaaaggcagcgttaattagcttcataattggtgctattcttgttc  
cagaatatgtatttagcatgccattaagagaagaacctgtcatccaccaatagcagtaaatgtatgagacgaaggattataaattcagcattc  
ctttcgttactgtatcagataccgttataaacagagctaatatagtttagcaacgggtttgcaaccttcgagtagatgcttttaaaaaaacgaa  
cctctatcagcaggttcaaatcgaacacagaaatacttgaaaaagaaagaaagatccaaaaataagaagaaatattcatgataaaat  
tagccgtaaaaggcttctaaaagatagtttctttgaagattaaggatgcaaaaactaattgagagttggttctggcagccgtattgtttacat  
ggcttttctacaaggcagcagtaactttaccgagattcctacgatcttaattgataaataagctataggtactaaagttcgtgactatgttac  
gttatatgaaaaatgattttctatcattttctgtatattttgtttgtaacaacaatgaacacgaatgtaaggattgattgtatcagcatgccttt  
atctgtttgacgattctgtgcttaccgggaaaggggatccaatatttgatgatcctaaagcttaattggtttttcctcgaatgaattgaaaggtat  
atatccaccgataatttcatcaacaaccataataagaactatcatttcgaaacaaaaaggttatccatagctacattcactctaactgtaaatc  
tacaatgatactcatgcatgaacgttgtccattttatccaaaagtgaattcgagtagagaagagaagggtgatgctgctaccactagggtt  
gaaaggcctcgttttcatacattcgaagaagcaagattgaaactatgttaattaacagattaaattgtatcgtatttgattgactctcatatgtt  
ttaatatacaaaagcatttttagcaattgcgatattactacgatgcataggctgtgaatggaaaacatacctcggatgaaccgatataatgcc  
cattcgtaatatcttaccattataaaatataaaatagggatcacattttaaaccaaagatttgataattgattataaaagcagcttagtaccctt  
attgatactttttgtatggatgggtttggcgttagtaaacctagcgttacgtaagtagtataacagatgtgttacgcaatcctcaaaaaacatt  
aagaatgggaaaacagatctcgttaccaggttgcaaaaactcactcaagtagtaagactgccaacttcaactcactgacttatttattgcttt  
ttcaataaggagcataaaatgagcaggaagaaacggacaattcgtacggaggatgatgaccgttatgaggatgataccggagatttgatctag  
gccagattggctcaggttggttagtaaggttccaggttctatgcagaaatgggacgccattcctgatgatgaaaatgaaaacctggat  
gtgtacgtgtgaaaaatgatgagattcaactttactccataacaagccgaaaacgccgatgttctaaaaactacaactgaaagtaatgaac  
aaattcgttagaaactctatgtcttttagagaatcggagtcacatctagtaaacacgaaaaactgcattggctcggtagcagttgccatgaatgt  
aatgtgactccagttatcaatgatgattatcgacgcttatgcaaaaaagagctttggctgccagtgctcctaagcgcaagttcaaatgattgat  
gatagagggtgtagcctccttggcctggaaacgctgggtgctcgaatagaacactacatcattattgtaagttttctttttttttattatc  
taatcctactgtaaaccgattataacccttcttagcgtatgttaaccaagaactggcgaggcctaaagaactcacgtattcccagaaacg  
agcttagatattctttcaaatgctttgaagattatgaatattggactttgaagggcttctgtaatacgttaagcaacctgaggttaagtcattgc

ttctatccacattatttattacgctaagtgaatgtacgagaaactaattgaatgtgaaggtttatttgaaggaggttcttgatagcatagctatatt  
gaataaacgcggtccttatgctgttaaagtatagcttgaagcctgagataaaaggaacaatggatgctgccacgagagaacttttgaatcaacaa  
gtatctcaatcggattcattcaacagccgaatgcagacaagggttctgcctctcaattggccttctcatccgcaagtgatgccaacaaagat  
ggagacaacgatgatgaggttgaatgattgatattctataagttaacgaattaatgaactttctgttttgggtttttgttgaaggttccaaaat  
ctcaatgtttcatcacctgctcctgtaacgatagactggccatcagggtctatagacaaatgaagcacacgggttgtgtgtccagtaagattaaca  
acgtttgaaaggttggatacttccatagtgaaacctgattttggcatagccatgagtagtaacaatttcattcgacgtcttagaccatgccaat  
gcatactgggatcctgtatccagccgattttgcagcttctctgttaatgtattatgtatcattaaggatctgtcactgttctcctccacttgccaaa  
attcctcgttggtagggctccaccaatgtcttgacagcggcactatgctcaagaatgatgacgtggtcttgtgttccatagctccatacaa  
cgagtttgggtgatctccgccagatgccaatgacctaggttgccttccattgaagaccacaaatttctgtgatgtccttaactttcagataac  
atcagattgacgcaggtcatgatgtctagcatttcatctttccaccactgtttaaagtattaccattggacgctaagtctgctactctttggagt  
ggccgctaaactcctatgggttggatcattccgtgtccagatgtgaataaatcctgaatctgttccaacggcgatattgttctattccagtc  
cacaacactagtcacattgtttgcttcccaaaagtcatggagtttaccactttaccactgttggctgaccacaaatatacactgctcgcagac  
cactgctaatagtttgatcttcccaactaagcaagttaagataaaagtcatcttcaagtaaggggcatccaaaactttgtatggagctttagg  
aaatactcttttaggtttggaggacgaagcaagaggtctgtgattgaggtgagatgggagataatgagtacgaattcctgtgggaatgtcaaa  
gtaactttttctgacttctttaggtctccgtagcgaaggttcttggagctacctgtttatttccaaatagttcgatacttagaagctccataat  
tgccgttgaactgattacattagcactgaagcaaggttcttataattatgttcaacttaccacttccggaactttagctgtaaagatgttctt  
cacttattgtcttccgaatcgattcaaaactaatatacaactcattgtgacgttgcgtatggggatgaatctatcgccatcttgcgattaattctgc  
agcgttggcaaggataaaagaaaaagaactttgaaaagactctaagttatccacatgttttgggttttccctaagctatagtctttattttgtt  
tacatgcatgagaaacaacgagttatattactatcaaaagatgaaaaccaattattataaataaaaaataacaaacaaatattatgacaca  
gatcaagcaattgtttgaatatactgttttggaaactgatttgtgaaagaatgatttcatgtctatagcattaagtaagaaaaatgttctcta  
ttttgacttaaatagacgttagtacgaagcaagcttaagcttgaagataccttttctgagcaagtgcttggaggtgttttgaattgatcg  
agatccattgagttaaaagtgggtctcaactaaaccaagtaacactctaaaattcgggttgcgttctccattatctgtgggatagcaatg  
aacacgagaaaagtcgacttctgtaatttctgtaagtaatcgagatgttctcaattgtattgcaaatctgacttgtattcatgcaatttgattg  
ctggataagaaaatgacctttgtcagaagtgaaaaaattacggaaagaagtagctgagactccaccgtgctccacaggtaaacctttccctgta  
taaaggataaataaataaccattaactttcatacatcgacttgaagcagcagtaggctccggaatattcaattgacaattggatcgtaaactctg  
atftaaagcccatattgtgaagaggaatgataacaggatagatcatcatgcaaatgactttaacatgtcctgtttttatttgaagtgaaaaaagt  
attcctacctgcttctgatggattgctaataaaaactcttgatttcatcaatgccatcatatacgacggaaaactttcaagtttctggcaaatatcc  
gtatactcggaaactggacctgttactaccatattcaaccagaaggttactatccttttgaaaaccagtttgaagattataagattttgggt  
agttgagatatacgacgactaatgggttagtaaggttttaataaagttgacttaccgtgttttggcatgtagctactaaagtttcacaatctgctta  
gaaaaaacgtcttttggatgaaacaatgggtaaccgtatagatggcatctactctctgagtttcaactgttctgtagaaagtgagaactt  
ggatagaagcagttgacttagtatactagcggtttgtgtattcaaaaataatagcggtttctgaattaattgcagaaatgattagcgtgtgtcc  
ttcggataatcactaactttctgcttaatttgcttaaccggagacctttgaagaagaaacctgattttgacgtgggtaccaataaatccact  
cagagattctaatacatccccttttaaggttactgtgccaactactagtcagatagaagaagtaatttccgccagttttagacataatgttctg  
atcaagtcgtctatattccgagtcgttttcaacacaaataggtctattgagattcattgttcaattaagtctgtgtatacaactgcaacgattg  
ctgccttctcggttcttagcaatgataatgctctatataattcattagcattttgtatgcacaagtaacttgccttttgcatagcgttgcctaat  
ccaaggatatgtatcttcttgccttcttccaagagtttagctgcaactttcacagcgttaataaagcattgagccgttggcttctgattcaaa  
ctttttgaatgtgacttaagatacgaactatgtctaactcattttggcttggatcgatggaagtatcataatggaataccatttcatccttccaga  
tcagccaaaacagtttcttaccattgattctaaataggttagtaagtaattctgtacattaggacacttacggataaacgataaaagtgt  
aagcattatcataaccaatgaagagaatcttagacttggaaatttggcttataattatcgctttagctggaagttgatgcttcaacaatattc  
cgtttaaactcgggtattagcggatgtacgagatgtcaattagaatattgttcaaaaatgaactttagctgaagcttcttttagcaagcatcaa  
atgatggttcatcaggttctgttgaagtttttcttttccatcaacactccttgaaggatacagccaaaatcatctgttatattgttgcaggtatc  
gcaaaattcgcacttccattgtatccgtgaaaattgattgtgtggaactaaagtaagcaccgcaaatctgcaatatggaattgataattc  
ttttccatcttcccaattgtacacgcagtcaggattattgactgaaaaggatgtgcatcaaggagaaaggcaggctagaaggaatttgattg  
cgtttctgggacagtcctgtatactgagcgaagaaagcaaggatcgttgaatccttaagaaaaagatagtcgggtcaaacagtaggaac  
gcaatcacttgaaccgggtctatggaactttgaaaaagaattcgggtttccagacgctcagataaaataggattgtatttccctacaacaag  
ctcactaagctcgtctcgtggtactggaagagattgatttagttatccattcatctcctcaaatgggtatagaaaggacttgaattgcacttca  
tcagaactatttgcgagaacaattagaggaacatgataaggtccgctcatagaaaagatcatcttcaaaaagaatcaccaaaaaaatc  
aggactcaaaatctgagctgccaggagctaataccttagtctggcttccagatacaggcaaccaagaaaagctgtgcaagagacttttca

gaagaaattcagaaagtaacttttctgtaggtcttctcgtacagcttttcaagttgggtgtgtaaagtcagtatgactgtgtttatttaccatag  
taaattgtttatgcccgagaactgacttaagtaaaaaacaaaagaagatacatctaaattacatgtttattttttaagaagcttccagagt  
acaaaataaacataatccttaccataaaaacttgcctataatggtaacgtattttgtactcatcttatttgaatgaactactgacataatca  
gaattaaatataaaaagatattctgcaagaaaaatcaatcaaacattataacgttggccttctgtaaaactatatttaccatggacacgcag  
aaaagcatatgaattaataactacatttccctaaaaaaacaaatagatagtagtttcttattataaagccagtttcaagaaaaacctaaaatgt  
acgaagtataaaaacacgcttctgttttctaaaacatgttggactaccatagtagtgtagtcacggagtcattattcgttcttggaaagtcaccac  
caaagactgcaagttgtgtctgacccttcttttccggccatcttctgttggcaaataaggctgtgttttagaaattatagtaatttattttaatta  
ataccttaatagtcgctctagtttgataaggtttggggttctaaatgaatagttcagtgctggatccggaaactcaaatgcccagtttctgggg  
taaagtactagaacgaaccagaaaaacgaaaggaaatttgatgatacttttcttaaaacaggaattaaatcaatctgctcagaattgtcg  
gagtcaccagaagggttagttcttaacctgcaaaggaagttcgaagagatgatcgcagtttgaagcactgatgtccttcaaacctggcag  
tccgagcataaattctccaaccaggcagtcctaatgagtgctataacgacaacgaatattccactagcggccgatgatttagggtcagaagaat  
atttcaaacagccagctacggatgcaggaattgtgaaggtctgctcaacggtgactactggacccttttaatgaacacaggttataaaaaa  
atcctcccaagataactaattctagaggtaacgctaggtggactgcagaacattgggattatcttgagcagcggatgcaagagtttggatgcat  
ttcagatgacacatcaacaagttggagagcttttgaagataaacgcttcatggaccctttcatcactgttaagatattagtagatgaaatgcc  
aagcttacaagaagaacaatcctacgacattgagagcctttataatattctggttacgaaaaatagccggagaaactcaagtggaagg  
gcgacttgggtgctcaggagacagccattatagccaggaagtagcgaacttatttggagcaaggtggactgaataaccagttctgcaatcaaa  
tttgggcaggaaaatgccaaagccattcgtgcttttattctaatataaaaaactctcacatcgagacgcaaaaagtatatatcaccacgt  
taggagagcttataaccatttgaggagcgtgtgtgtggagtaaggaagaagatgaagagttgaggaggtgaagatgatttgtttatgttacatt  
ctggagatatactactaaatttctagaatgttttggagcatgggaaatgtggacaaaaattggccgtaaaatggcacgcatgcaaacgattg  
ccgggatcgttggcgtgatgcagttcgttccggcgtatgattgaaacgcaatgcatggtcttggatgaagaaactcagctattgcaaatcgtggc  
agagttacggaatcgagaggatattagttccgatattaactggaccttagtagcacaactttgggaacaaggacgaggttcaatgccgatata  
aatttcagcagtaaccaagtctgctcccaattgaaactacaagataacgttggctctggagaggtagaataaaccttgaataagtgatat  
attaacttagctatagaatttacgattcactgtcaagtaggagatcaaatcattgggatggtatcgtgagagaggcaaatgggcgctggctc  
cgtgatcaaaactgttccagtttatttgaaaaaatgattccaagttatgataactcccccttagaggctacacaatccgctatttccga  
tttcaagtagtactctccgatttctggctgaattgaggttgggtataatttccatgcatccgttttctctattcaatataattttacgctttgtct  
tctatctagtcattcaacttctttctattcctgttctcgtgcaactctcgggtaattcgggtatttttagaggttccaggttctgtataaaacggat  
ttcatgtacgaaaaaccatttattttagatgtaaattccaagaaaatgacttccgtctacctttttgcatgtttcctttatataattttaatacag  
ttaataattttactgcataatcattttagcactcattatgaagcagtttctccaacaacattgaaaagcctgtggaaaaaaccaaatgg  
gaacgtttagatgtgtatgggtggatacgtatcgttccgaaatcaaaaatgtgtgttttctatggtctctgacggcagctgtcaacagccatt  
caggtgtagccactccagagcaagctcatttgaagtattcgatagttgtgacatgttaatgattttgttcaagttccttctgataataagttc  
actaacatttctcctagattatcttaccggtctagtgcaaggtccaaggaactgaaatttcaagaaagcagctctcgaaagcaacagtac  
gaattattagctgaaaagatcgatctttatggaaaagtaacaatgtacgacacggtagttggttctaagtttagcacttaattttaaagagt  
caaaaattcataactaacattcaaaaaactaggactatccaattcaaaagaaaaattgacgacagaatttttaggcaatatcctcatttaaga  
gttcgactgcgaaacaaaatgacatgttctgtaaggctgacacctggaaaggattacggtcttttttagcaagaacgattttattgaaacca  
atcccccttttaacatctcagattgtgaggggtctggtgaaggttcttagtcacccctcattcaaaagaaaatgacttctgctgtaattcctaat  
gttcaaaacaggtagcaaaaagcttctgttttttggaaacccgacatttctgaccgtcttaccagcttatttggaaagcgttggccttggaa  
gtctcgggcttatacattaccagcttttccgagcagagaatgacacagctcactggcagaatttggatgcttgaagttgaaattgcc  
tttatagaatcattggacaccttaccgattgttgaagaccttcaaatatctgattcaatatttcaagaaaaaggacattatcgggagcatt  
ggaatcatgtattgaaacagtgcatgaatatcatatacagaagcaatggacgctctaaaaaattcaagcaacgcttggcatgatctccaga  
atggggcaatgatcttagcagtgaaatgaacgctatctgacagatgcttatttgaagggacctgtattttagaccgattaccctgctctatcaag  
cctttttacatgaagccagctcaaaataacactgtcgcagcaatggattatttagtcccgaagtgaggagaattagtcggtggatccttgcggaaa  
gattccattactcggaggaagtccaagggattagaatggtattctgaaatgcttcaacaagcaataccccctcacggtggttttggccttggg  
attgaacgattgtagcgttctagaaggtaatgcaaaaacgtacgtgaaacattcctttccacgctctccggatcaatatttgcctaaacta  
atctcgaacaaattcctcaaatggatgagagaattgagcaacgtttaccttttctgagatttaccaaattcatgattaaattgaatgcttattc  
tcgtcaaaattttagaaatgatgaggtcctccagaagacaaattgactgtagattccttataagagtcattaacgttatacaatgttgaatgt  
cttctgaatctagaatatacggaaactcaatttggccttctcacggttagtaattctcacgggttagagaacaaatagattggaagtagtaact  
acagttgtagaattgtatgttaattggactctggtgtactacgtacatagaagctaggaatgtccagggatctggttaagtgcttccgatgactt  
attcaaccacaccattcaaatatatactcctgctgagacagctaatgtaattctatcttctactggtttccctttgtgaaataggttctta



actcataaacgtatttcttgtttgttactatttgaataattatccttagtcttatgttatttgaatattttaaagtatgttcttatgatggcgta  
ttgtaatagttattatattaacaagacatctatcatgacaggcctaagaacataaataaacctgaaggagatgagtttttcgggattgctctcaa  
tgcgattaaccatctgaaattgcaagtcaacaaaaggtcaggagatcatacttaagtacttggtaaacttattgagggtacgttataaaaagat  
attctaatacatttaacatcatattccatgtttatattatgaactataagttatgaaaatacactcttctacttgcctcatccttaataactttattagaa  
gccttttaacatattttaaagatatacgaatagtttaataactttaataatcaagttacattttatgtttccttaataccttaaacctttgtaccta  
cttcagcttcagtcaacaaaacctctcatttatattatgaataaaagacttcaccaaccgtattactttctattgattaaaatgcatgcagaaaa  
atthcatgttaagagaataatcttaagataggtatgtccatgatcaattatagtgggaaaaaagggaaccaagctccaatgaaaagcata  
aggaaagagaacactctataaacctgaatgcaagtgaagcttagggatagagactgtaaagaataaaaaagatagatcaacaggttactgc  
tgttctaaagccaactcgtgaacataagtaaaaagagcttaataccttcatgaagttatccaagctaattttctattgatgctatgagcaccat  
catcaccacggccatgggtagcaaaaagaacattcctattcaaggcgttgcgaaagtaacgggtgacagggatggaaccacctcacggacaaa  
gtcaggcttgacacaaaaacgctcagtgacgacttccaacgtcatagtgccagtggtgggggaagaactccaccaggcaccagcgtga  
agagcatggaaggaagtttgttcttgaacccaaagcgtgaaaacctttctacatggtcttgtacaagcttacgaacagtttcgggtccatgt  
tgggtacggtagcaatggaaaattaccattcaccttggcggaatgactgtcttgcaccgctaccactgaaggcaccttcaataccatgaagg  
acaatgtagggtaacgccagcgggttgaaggtagccttggtatcgtataaatggaaatgtagcaccgggtggcatttctcaaatcgcctcatct  
catagtcgatgggtgctacagacggcttctcagaagttagctcggcacttctgcataataaccagggatcaaatctcgccttgggcttga  
ctaaggagctcatgacggcaatcaaatcagtcataaggctcatgaacggtagccgaaaaacaccagaatgtaggtcggcagcagggccctta  
cggctatgctaaagtagcttacaccacgtaatccgtaagtcaacacgggcttttggtaaccaaccaataagatcgcctgatacaaacacagctc  
ccttggcaagactttttagcctcggcagcaatgagatcatcaaggccctcgtaccatacttccatacctcaagcacatcaacaagttga  
cagggaaagccaaacgcatttcttggtaggctgaacggcagacatccaaccaatgaggggacccttatcgtcagtgacaccacgagcaatcat  
acggctccttattgtccactcaagcttgaaggtcagtagaccagcctcagatttgaagcaggtgaacatcaaaaatgattgtagattaaaac  
agtcttttgaaggatcacttccatattgaccaaggacaatagggggcaaggggacttttgaaccgtccatttcatggaagccaatgtcgcgctt  
tccatcttggctccaagtttgggaattcatcaacgacaaaagcggccatttcatagaccttaggacgaaggtggcatctgcagacacggaagg  
aatggctaccgcttccgagagaagagcgataaattcatccttttctggtcagcctgaaccacgtttaggaaaagatttctgtagtacttagatt  
acatacaagttgatacaagttcaagtgctatttcttgaagcagctttaaagagcgtgttggtaaagttgacttgggttttcgcttatgtttgt  
tttgataataagtcactcggctattttgttaaagtcgatacacgaataacgaatggaacaagcactaaaggaatactacagcttccata  
gcaatttgggcaatccgggtatttgaacttattagacgttctgttataatgtgagagcattttagataatcctaaagtcgctggacaagat  
ttcaatgttttattatcattaaagaactgattcatatacagtttatagtaggaatacttatttaagttctatcattcttgacttgcagaaaacagaa  
attgtagtactgaaaggaatctttcatctaatacagataagcaagtcacttctgacttggcattcagatagctccttcttaaaatttgtatt  
tttagttgtatttgggtgtttaaagaagcattttcaaacgatcacaacagacatgatcaatcatcagcagtcagtgcaaaaaaacaattct  
gcatctaccgaaccaatgctcctaatcgtcaagaagctagttttcagatcgacaataaagagaccatcacctcctgtataatttctcctcca  
ccttcagttgtctttaccaactgagggatcacgaggaccgcaaacgggatgtctgaattaaatgaaggtaacccttgcgaacgggtgaagaa  
gattccactgaccaaacacatgagttacacgagaccctggagaaaggatagatgccacatgccaaatctccaggaaatggaatcaccgag  
ccgtctgttgacactcagtgcaacttgggacacatttatttaacgttccaggttctttaaactcgtgaaattgggagcagatgacttgaagtcg  
attatgtttatcttcttgaatgatggcgagttagtacgttgggtgtaaaaacttgcctcctggcttagcccatatttgaaggaaatggctatcgtc  
acttccgtgtggttattattactcagaatgggctattcctgttccagctgacgtatactggatctcctcttgaatggtttcagtttgcctatg  
ctatcttgatgggtcagttttcactaaccacgtactcctcaaatctcgtatccttgatgggtgagggcggaaatccactcataggatcgacgcgat  
cctcgtttatgaccgcaaggaccaaaccatatactcaagtaaaagtaattggcaagctgaatgtgtgaaatgcttgagaaaattttat  
attgagcgaatccacgctcctgactttcaacgatgagctcattgggagtaggggactgagtagaatggttgaatcctgaaattgaaat  
attcaatggatcgatataagaaaagcgaagaactggcaaaaacaaaatcaaatgcttcattcaacctaatttttatgcttatataacgaaac  
gagctttaaagtcgttccaaaattttcgttttcgaaacacaaaaacgaaaaaggaatagtaaaggtacttatcttaggacaatacaatgaaaa  
aatagagaaataactgctatttataatttctgattttcgtcttcataggcgtttataaaaatgactaaaaacgccgatcaagatgacaaagc  
gtcaaggaggaatggcaattaactgtaaatattggaatccattagtcataattttctttatctaattttagaaatcttctatgaagattcctt  
ccttctcatcgtctcatgcccttctgactattttcacccatgttctgctgtagtatttctcagaaattttctttaaagcgaaaaaatgggg  
ttcgttacagttcaatagaatatcatttaaagatattctattagttacctttatgatgctccttacctgtgcaccaacagaggttgcaaacggc  
aacattaggcacttttacttcaatagtcactttaaactcatcgggtgaatttggtaacgtttgttttattcttcttggttcatcgccttctttag  
aacatttctagaaatttaggaagtaatcgtaaaggatagaaacctctcaaaaacttatgaaagtcactttttgtttttatgttccattctctc  
aatctaattgttacaaattttcatcaccaaaggtggcatttccctgctcaatataaaaacccatcgattttttattctatttctcgaataagcc  
taggtacaactctcgtataaaaattcaatggataatttaagaaaaacggttgaactatactacgaaaaacgacgaattcaatgaggatgatg

ctactcctcagtcgacaaggtaaagcatattgcagatttctcaattcgtttcttttcttcattattccaataatcctctcagtttattttttt  
tatttttttttcttttcacggttcattttactaactcgcagtccttttagaacaagaagctttgttgaccatctaagacttacaatgccagagat  
aatcgaatgtttctattttgtttccttttgtttctattctagcagctattctcctgtaccagaaaccctttctcaaatggttgaggtctta  
tccttggttctgcccctttattatgtatttttctacaaactatactattagctcgtccaagaccctttcgcagggaaaatattgctttattgtaat  
atcgcctcccagggtggtttaccttctgacaattcacaacaaaaatccgttctgagttcattcttttcttacgattccttgcactggctgtttctg  
ttttacagaactcactcgtattctatgtattctgctgcttaggttagaaagggtggacaacatgcgatttgcataattggattcaattgattttcc  
tgtttctgcatgaaaactatgcaatagttgtttcaactgttacttatcatgtcagcctttacagcttcattcatgaaaagaatggatctttaa  
agtctctatgtgtatagcctaccacgactatttattaccattaccaagaatagaatctatcagcaaatgtcaccttgaatatacatagacatga  
aagacattttttcatttattgtacatacaaaaataatacaacagcttatgcaactaacatagaaaaaatcaattataaacgtatttaggcaat  
gtaagtagaagcactgacattaccaccagggcctcagttgatatgaatccttctgagcagggaaagtctcattagcctcatcaggcaaaa  
cacggaaggtatgacaccgaagtagtcacgttgagcttgaataaaccagcaggcaagacggagctacggtagccgtcgtagaagcaaga  
ccagtagaagtgaggagtaggaattccaagagagcagctgggaaacaacgcgacgccagccacttgagccttggtgagcctctctga  
agaaggatggaagagaatagactcaagcttaggattcacggaaagctcagtgatccttgaggaaaacagagcggatgatgcaaccac  
cacgccatcaaggcaataccggcgttggagcttcagccgtactccttagcagcctcacgcataagcatgaaaccttgagcataagaata  
atcttgaggcatacaaaagcatctccaagtattaaggaattgttctgtcaccgggtgaacttggcggtaggaccagcagcttctcagaagca  
cgaacacgctcaccctcaaagaggaaaggctacgagcaaaaacagcttcggaatcaaagtgcgggagtagccatttcaaagcattttgac  
cggctcactaccggtaccctttgaccggcagcatcaaggatctttcaaccatggacttgccatcatcggccttgaacgcaaaacatcacgag  
taattcaatcaagaaagctgagcttacccttattcattgttcaaagatggaagcagctcatcaacagacaagccaaggccagcttgagg  
atatcataggttctgcaaatcaattgcatatcgccttattcaataccgttggaccatctaacatagtgaccagcacttgttccaaccagct  
cgcagcaaggctcatccttacctgcttggcggcaagagattggaatgggcttgatacaggccaggcagcagggttccgcccggcatcaa  
agagggacatgacgagcaccctctcaccgccagaaacaccagagccaacaaagagaatgcccttctggccaagtcttcaaacgacgggt  
ggtatcaggatagtgagagttaccacatcaacgatgatgtcaccttctcaagatgaggaagtaacattcgcagaaaggaatcgacggcaggtc  
cagccttaacgagcaaaatagcaacacgaggcttctcaacttggcaacgaattcttcgacagaatgagcacaacgatggacttgcctataaac  
aatggagcatattagtaaccgagcataattcaatcgaacaaaacggttcttctaacttacccttggcttctgttccatgaaattatcgacctt  
gagacgtacggttgaagcgcaaacgggtgaaactattcgaggtcagtcagcgcgttctacaagagatttcaagataccgttctcctcttct  
gagaacaaggatccaccatctcagaaaacttacccttctcagcaccgtttaaataagagtttgaccattacggccaagccaataagacaa  
aatctttacatgttagattttctaccaacaaaacacaaaaacccaaggaaagatcatgggtctaaggggtttcataccagctctacagat  
tagcatatgctccatagtgaaataaacagaaataaacctcctacttacacagcagtttgagacatcttcaataaatccgttctaccgttatg  
gttgttacaagtaattatagttgtgtgtcccactccgtttatactggtttccatctcgtatgcatgacgtaatcatcgggaggtatcgtagaac  
ctttcgaagaatcacggatcatctttgtgacgaatgttaggtgacgtgtattgtcaacgcagcagaaaaacatcgggcccgaatacacagcga  
ctcgttcacacagaatcaaaggaatcaaaggatgtttgtccataggttaggaaagatctcgtaaagcgaatccctgagaacagggcaaaaa  
ggaaaaaccgagaaaaacagcttacctctaaaagtttagacgttgcctttcatatacatatttctattttgatgtgcgctcgtgtttgccttc  
ctcagctcgtcatgtaactgcatgaaaggaacgaaaaaaacaaaataactgcatgtaggggtttctacagttggtacgaatctccg  
caggattaatcaaaaacgtgatctataaacgatttagtccccttcaaactctcgtctttgtgtttctttctcgtgattcgttctcttcttctt  
attgattcttgccattcaaccttatttgaacaccaaactcattaattggagttccgatcaggatctcactgagttgttcaactgattgagtaat  
ctccttttcttttctatgtcttcttttcttcttttcttctatgtgtgactgatgctggctgtttccccacagccgctcggacggcaggaatagggt  
tcaaaaacgctgtccagaacatgcatgtttacgttaataaaaccgaaacaaaattgtggaataaggaaggtatcaaacggaaaaacat  
ctaagaaacaaagatcaataaaaccataaaaaataatcaatggatttacaggtgaaagtaaaattttgaactgaacctggtttcttactc  
tactacatgttttctcatagttggatcttaaatgaaatcaaacattactcttagttacgaatattactatttacaacatgaatgattagaaa  
atggcggaaatcaaaaacgcttctgttttttattagaaaaaaacagcactctaaataataaaggtagtttattgaaaggaatattaca  
gaaaaaattatggtaaaagattttcttcaacaacaagaagttgtctaaaaaggatgcttcatgtaacatccacttcaacatgcatgggctt  
ttatcagcatagggatgaaagctatgtccaccgctcccgtagaccaccgcgacggccacgatcgcgtgctgattgggtccaccaggttccg  
attgtgataccacctgctcagttctgaaccagcttcccagggtctttgatggatcaaaaataaccagctccttctgttgttgttgttgtt  
gttgttgttgcactcgtccatgccggggcatcacgggtgggtataaggatcgtgccagctcgtcgtcgtggcatattccgcatggcttccat  
atactgctcattgacgataatattgcctcatagcaggtgtacacctcgtacatattcatattttgtgaataacgggttcatgccacat  
ggaaattatgctgatgctggtcatggctatctcgaactcgaacttggcgtagcacgcttacttccacaggcttccatgaatagtaataacggt  
tgagacattgttgcctccaccgcttcttcttcaaaggttacaatccaatccacggggcctcccgtcttctgtccatcattagcgtcgcac  
taatactcgaccaaaattattaaagaatcacggaattcttctctgtgcaatcccctggaactccactacaacatcttctgttttttcttctt

tcacgaggaattgctcgttcgggtcaatctaatacatgtcagcatctttccacaccatctttctaataataatagctccacatacaatttaccatct  
aatgatgtctttcgacatcacctcgtttacacatctgggatccttaaacgtcaaaaatccaaatccacgtgatcgtccgctcgtactgtctcgc  
aactgtacagtcacaaaactcaccaaaactgtcaaagtaatcacgaagagacttaaccttattagtaactttgctttcccgaattaatattatct  
tgtctcagctttattatacgcctataacaacaatcaagctctgaccagcttaacagccgtttattatacataccatcagtagttcccagttcaa  
gccaccaataaacatttttctatgcatggttagtctcacatcaatcctttttctataaccctgtcaggaattcataccatcttctttataaaagg  
gctttggctcttttaggttctctgctgtctctcgggaataagacatagcagctggattgtctacgtttgtatacgaaggagtgagttctcag  
gctttcagctgctcccagctagcggagattgatctggctctcatctcattaccgcaggctccttgccttcagttccattttctcacaactctc  
gatataattttctctacattggctcctcctttctgtttctactgggttcgagcctaatagcatctgtctttttctcgaatttgtcattttcg  
gcttcttcttaccgacttctacaatttcattttggcctgattggctcatttttgattcgtctgtcccttcgatttcaacatcattcttccac  
actaaacagttcaattattagtcacatcaccttaaaaacacgtgtactactataagctttaaacaactcatcttaaaaatccgaacctccat  
cccgaatagcaatttattgacaaaagaattatggtggttagtagagatggaaagacgtgaaatccccgccttactcacacttaggaaac  
gcagtgacgactgtatgtggaataactgaggaataatgaatttaagaacagaaaacaatagagtaaattatgcaatattactaggtaaac  
gtgtattattgatgctgaaacgaatctaggaaagtgtaaattcgtattataaagaaggatcagaggaaggaaggaacaatatacattagaa  
ccctaaagtgagatgtaaataatgtgtcgcgggtataatagaatccaacagaataaataaaataatgagaccggacattaaaagtaagtga  
taaagaagaataaaataactgaggagtagatgagatgctaattcgtatacttctgtctgtacgcaataagaaaaatctttgggttagtga  
aagcagaatccagaaaagaagatcatgtcaagaaacttaaaaggattagaaacgaactgaatgtagacttaaggaaaccgtatttc  
agtaaaggttgtcacgcaaaagatttacgagagaattcgagctttatatcgacaatctaatgaggggtgccgagccaggaagattggtttca  
aaaataatagcgggtaatttagattcgtcatgcacatatcaatttcatctgtgcttagtagcttcagccgtaattcgtatcttctggattggagct  
atcattctattaagcattttcttagagattcggcacaagccatctttagggagagctgtcctctgggtcaagaattgcttagctttggcag  
atcagaaaaatcggctgagcgttagcgttgccattcaacaccgttctgtggaagaaccacatttgcgaggctcgtatgtaagaccaagg  
aaaaaatacggctggttcataggtcatcatcagtaacctcaggtgctatgtacattctatccctcaaggctgtttaaagaagaacag  
gaagactgaagacaagccaaagtgcgaaatctaagattaccttgcgggtaataagcacattcgaaggctaacgtctagatgtacaacacc  
gagcttgtaaaatagataaacctaaataaagtcaataaaactcagatgagttcacttacctggctcaactgtaataagaatttccaaacacgg  
aaagctcagcttgcattaaaccagttcagttaaaaaggtaacctaaatcgccattctcacagattctagttgaagaatagttgatcattat  
attccaaaagtcatcatgtaacaatgcgtggacagtcgctacctgtcgtaggatgtggcttctggattgtcgcagatttcttagaacta  
ttaccttctctcagattttcacgatggagaaatcttttggagatcagccattttgaaacttataaacataggagaagtcatttctcgtcag  
aattcacctgagaaaaccggccatacagcattcagtaaccgattggcatcgttaaattcctcatggctcgttctgtctaaaaaagttggactcg  
tcggtgtcaacttaacgatgatgctatcctcgtcctcatcttctccaccctgtcgtaggaggatgtagaaaaattgcttgagactgttt  
ggcgtattataagtatttaaaaaatcatctgaaccacatgaaaacgttggcaaggataacatgtcaacactgtcttcaaatctcagaagacga  
atttcgggcttcaggcattgcaaaaatcaggcccaggacacttccggcgaagcagtagagaagatggggatgtggggattccggatagccg  
ctactcatatgagaagtagtttacagggtgatgaggtgttactttcggattggtgaattgacttccataacatttcttctcagtttcgat  
aagagccctgactaaaggaccggaaaagctctttgttttatctaaaggtgtaattgtctctgattgttgatcacgatcttgattttacagtcc  
aagagactagaaaggagtcgggtgtttttctgttggtgatccattcttgagaataaccatgctttaaagtagtagatagccgaactttt  
ctttggattcatcaacggcgtatgtgggttcttcaaaagtagaagcattgtaaacaatgaggtgagtaggactcattagacacggaatc  
gctgaagatgctctatttcagtaacaatggcctttactctattctcgtccagagaagaaaacgatgaacgcgtcgggtgactaggtgtcata  
gaaacagaatccattttgatatacccgtatctgtcttttaataagtagcgtttatataatataatataatataagttcaaaatgaggcaaggcg  
taaattgattggagtaattgaaactttagtaacaatgagtttaattctccaaatcgatagaccgtatctcaatttcttgggaatttcttccaaa  
gaaaggaaatagtagtcttattgatcgttgcgtggaagaagacaacattcgttagtaaaacaataaacagaatcgcgagttgattcaacgc  
gtacacaaacgcgacgcgtcgcgtaataataatcactcaccatacgcgtcagatattctgtgggtggaatcattttaacgcgacgcgcctct  
gtatcttcttaaaacaaacacttaacaaaagcaaaaacagttgaaaaatggccaacggcttccgttggttactcgtggttattaagtagt  
tttagattagataaattataatgaacgaatggcgatttagtactaacttgatatacagcacctcagattctcgtctttccccaaatcctg  
tctccaggtgtaacgggttaaagaattaaattcgaacctacatctgggtcctccaagcgttatcgtgtggttcttctgattccatcaattatgctc  
agtccatgcttagtactcaactaaatcatttgggtgccgaaaataagcttgcgaagggtgctttgtgcaattaactcaatttacggtcaattatg  
aaagaaggaaaatctaattgttcttggcctgaatgtattaactgaacttggttcatggaagaagattggaacccggccgggttagaaactgta  
gatactccggcgaacagcaaacctccagcaatggaggctccatggaccaatctactgcaccgctaactatctgctaatgcaggtagtttc  
tacgggaataactccccagctactgctcctcctcccaatggtaagagaccttctggcccaattctggaaatggatagcacaattatc  
tatccattgaaggactttctcttatcaaaaatagtgaccattcagctcgtgttaccataaatctgatataaaactggcataaccaacgtg  
gtgaaggaaagcttttagtgtaatttattagatgaaagcggagagattcgggctactggctcaacgatcaggtagacgcttttacgatattt

acatgaaggcaagttactacattagccgctgctgtgtaacatcgccaaaaacaatttacgaacgttcagaacgagtatgagctcatgttga  
acgtgataccgaaataaagaagactgaagatcaatcggtgttctatcgctaggttagcttggtttctgttacaagaagttggtaattgcaaa  
ggacgctgtaatcgatgttattggtgtcttacaactgttggctgttcagcaaattaccagtcgtgctacttctcaggccttgataagcgtgaca  
ttactgtcgttgatcaaacgtgtttgaaatgaggattactttatggggaaaacttgcaattgaattttccggtcccaggagagatatttggcttta  
aggcggttaaagtaaacgattttcaaggtcgtatctttatctatgttgaccagcagcactatgtctattgatctgatatccaagagctcagctattg  
aagggatggtatgatggacagggtagaggtaaaaactttgcaaacacagcagcaatgatcaatcagctctgtatccggacgatcagcagaa  
aggaaaagcattgccaagttcaagctgagcatttaggcatgtctgaaacacgtgactactcagcttgaagggtactattgtttatattcgaaaa  
aagaacgtatcataacctgctgacctgaccggactgcaataaaaaagcttttgatcaaggtgggtcttggcgttgtaaaaaatgtaataaaga  
atatgatgctcctcaatatcgatacattatgacgattgagttggtgatcataccggacaactttggctgaatgtttttgatgatgttggtaaaatta  
taatgcgcaagttagcggacgaacttaacgattatcaagaaaatgatgaaaatgctttatgaactgtatggctgaagcgtgctatttaccataca  
tctttcaatgctgtgcaaaagaagataaacttcaaaggagagactcgtgttctgttactgtcacttcttaactcagatgaactggcaagaagaat  
ccaagaggtgatcgattatataccaagctgcaaaactaagcatcatccatatagctactcgtggtcagggaaaattttgtgaaacccaaaaaggg  
attattttgtgatgagagttcatcctagatttattataaaaagcttctcttttttttttttaatacaatttagttgctatctaacttattcaattc  
ctgtataccctataataaaatggaaatacttacagactaaaatgaggctaatcgttcaccaagaatatacaagatttgaagagaaaatac  
atcatagcagtataagaatgtttacgagcgaaaaacagtaataatacataaacataatgtccaaatagaagtgagaaagagcttataataatag  
agagcgttaaaaattcaaatctttcttttccaactatctactgttaataccacaaagcaagaacattttttagtttcttactgtatagagg  
atcaatggcaattcaggttctatagccatttccaactattttgtttgacaacttgcatttcttaatgctacaaaacttcaacgttacttactgatc  
accgtcgtgattgatcttctgacttttaccattgagttatctcgtaatagctaattcttacacgattcgttttctgattacaatccttttgatccct  
gttcttagatctgatgtcggattgtatgccttttggcgtgctttaaagccatattatgttagacaaaaactatgtatcagttataatggggag  
ctatggcgtggtttgtgcttctgcttttcaacggcatttgcaactgttagaggaatcagaaaagaccaagattacaatgaaatataaggctccc  
aaactagctaataacacattactccaattgctgaactctggataccactccagcaacctggcattttgttttctgcaaccaggcaattagttc  
tattctctgaccttcttgagtgctaatgataaaatcttaagctgaaatgtagcttacctacatgtcaatttgccttgattttgtcgaatcggt  
atgacgttcaggtagacaccttgaagtcgaatttattatgaccttctgaattttgtctcgggtagaatcctatttgggttaagaataaaccaaga  
gttttcatatttgatttacttctatgccagttactcagctgccttgaaggaactaatccaactttgtaaaaagtagcggcgaataaggttga  
gatgctgctatggtatcggattctgaccttcttctatcttctctggtcctgatttttataactaatgctcataaatggcttaatgacctcggg  
tacgacgatcctatagtccaagaataaccacaatttcatcgaagccctccaatctcctacggctatcataccgtaagcaaaaattcccctcct  
gcagattcttaggcatacggtttctgaatgcttctttatggacttgccctaaattatcgccatcgatgctgcaatagcgttcagaaagtccataggt  
ggtgaacataagatacaaagttataacatgacattgctgtaagaggttccaaatcatcgctgaatcttgggaaacatttactttgattggctt  
ctcctattgccatggtgaatgtcaggtccctctgctggtgtataccttccgcccactttttagaagagtttggcaagcaaaaacttttctacga  
tttgcgaataaccaggcagatattacactcgtgtaggtggtgctcttctttagaagaatctgattttgtatagtgccgatgcttgaagaact  
ttgtcagaataaactcaaaccttacgcgactcaccgttgatgtttcagctacaaatacagatgtgcccataaaaagtgatgtataatacacttt  
taattcatacatgttttttataatttagacaaaacatccgatgctttccaacatacggcaaaatataaaattacaaaaagtctatgcaataaa  
tctattctacaattttttagttcttacgaaaagacttctgacggaaatgaacaaacgttaaaaagcggagcgaagggtgaggggataaacat  
aagtcgaaggtacaagggagctctaaaagaagtagcaaacggttacagagcatggacagatcataaagttagaacatttgcacagtttct  
taggctgaagcaggagcagcagactcagcttctgattagcattaggagcctctgtagtgaggagcggcttctcagctcagccttctacca  
accttctcagaagcagcttattttctgcttctgctcctcggttcttttcttctcagagaaatagcatttcaacaaccaaggttaaggtcac  
caacttgcctaccgttcatttctgtaatagcacgggtttgttctcaggagtggtgaaggaacaaaaccgaaaccagaccagcggctgttacc  
acgaagcttaatcgggcgataatgtaaggtgggagagagcaacagcaatacagagcccgaattgggtgtaagcatcgaacatctcctcaag  
ccttctgttgaatgtaacagaagaccagaacatagatagagttgggaggaagaggcttagccttcttctgacagcagcatttctagatttgc  
cgcttctgtttttctgtatagggatttcggaattttcttattttcagtgcttctcctttagaagaagctcagcatctcagcggtagggcag  
ttcattattttctgtagcgggtggtcttctcctaagcttcaacagctgtagtgcacagctcagcaaaatagcattttgcataccttctttag  
attttttaggttcttgaacaggcggagctcttgtacaacaatctcgcgctgttcaaggtctttcatttaaggtatcaatagcctttgacgct  
ttcttctgttggatgtgacgaaggcgataaccagaggcactaagcaggtaccacggcgactcggcgaaaggtatagtaactttgcgactgt  
acttagttagcttccagcccagaatgatcaagaccaaggcaaacacttgaaggtgacgaactagcggatcaaaaattacaac  
atcaaaaaggtcccagcttaataatgtagagacccataatagttgttttaaccttcatctcatcattcatcttaagtcttccatacgaagctag  
ggtttgtcctttttttacatacacaggtccaacgggttcaacaaagaacggatttacttttctgtagacgtattcaagcgaaccaaaaa  
cgcgaaatctgttctgaggagtgattcttccggcgattcagcagcagaagcagcgggtttacagacttctacttcttgaatcagcct  
gtaggttatcaacaacggcttcttctgacagacattataatctgctagaggttttgcgtgaatgtggtgatgtgtaaggttaagttatgt

gagcgtggataatcacttagtacgcaactccgtaaggtagaataatcgcataccgaaaggtagaaaaaggagcttcagatacaggaat  
aggatataaatttagcaagattctatgattgaatTTTTAATAACCTCATGTTTTATTCTTAGGAACCTCAGAACATTCGGTGCAAAAAC  
GTGCTTTGCCGTTCACTAGACATAGGTAGGAAAGATGAAGATGGGGTTGGGACAGAAGTTGAAGACGCGGATTCTGAATTTGAGACATTGTA  
ACTTTGCATTTCCCTTTGCTAACGCTTTAATACTGAGTTGTAATCAAGCATTGCTTCATGGGCACCTGAGCGGAAACACGCTTGGTTTTGGAGACA  
GAGTACGGCTCATTTGCGTCAAAGTCTGTTATCCATAGAGGAGCTTATGGAGGAATACGAAGAGGTTTCTTTGGGATGTATTTGCCTTTGTCT  
ATTTTTATCCGTATTTCTGTGAGGCTAGCTCCCCTAACGGATCTAAGGCATTGATTCAACAATCTCATGGATCACAGCACTTGCCTTTCCAAC  
TAAATCTTTGGTAATAGTCCCTATATACTCATCTGGAGTTGTGATGGTTATATCCATATAGGGTCCAAAAATGGAAAAATGCGTTAGGTGTTGACGAT  
ACAGTTTTGAACAGCTTCCGAGTGGCCTTTGCCATCGCTGAGACAAAAGTGCCAAAGGCGAGAGGGAAGATGAAGAAGTAGATGAGGAA  
GAGAACATGCCTCAATGTGAACAGCTGTTGATCTCCAGAGGGGGAATCCATATAGTGGTCCATGAGATAAACCTGCTAAAATACCGTAGAAT  
AAATGCTCATCAATCGTGGAAAGCTCAAGCGACTCTGGGAAAGTAACAGAAATCATTTTTGCTCAGCCTGAAAGACAAAATCCCTTGAAAATG  
GTTAGCCTTGTGGTATCTACGATTTCACTAAAGGATATAAATGACTGTCAATGAGATACCCAATGGAAAGCCTTCTTTTATCAGCATAAGAA  
CAAGGCTGTGAATGTTTACGATATCTACTTGAAGCTTCTAAAGTTGCCGAGCTCCAAAATCGTTACGAGTCGCTGGTGAGAGATTTGCA  
GATGACAGCTCCCATCCCTTCCAAAATCCACTGATTGCTTTCGCTATTTGTATACCGAAGGGAAGGGTCTTACGGACCAAATTAGCAAGTGC  
TTCTAGTAACCTTGGTTCATCTTTAAAGAGTCTGGTCCAGACCGCATGCAGACTGGTCTGGAATAGGAATATGTAAGTGCAGAGGTTTTCC  
TTTTATGTAGGATGTTCTTTCTTTATTCTTAGTAATAATTGCATCACAGTATGAAATCTTTCAGACCACCTATCAATCAATATTTCCGGCTGAA  
ATCTCATCTACTTCTGTGTTGATCCGCATAAACATTGTACAACCTTATAGTACGCTCTGTTTTCTGTTCTTGGATTGATATCATCATCCCTCGTTT  
AAAGTTCCTTCTTCCCGAATGTAGGTAAGGATCCCTAGTCGGTGTATGAATGACTTAAAGACGAGTGCATATAAGGGGAGATTTCCAAA  
GAAATAGCATTAGAAGCTTTGGTAGTGTTATCTCTTTTGGAGCTGATAACCTCCGTAGGATCAGGAAGGTAATCAACTATAGCATCCATAGCAG  
GTTGAACCAATGTTTTAACGAGGATCCGCAAAGTACTGGGACTACATTTCCGTAATACATTGTTCCCTTAAAGCGGCTGTTAATCGATTTCC  
GAAAATGCATTCAATTTAGTTGTAAGTACTGTCACACAAAGTTTCACTAAGATCACAAAGAGTCATTACCATAGCTTCCCTGGCTTCTGAA  
ATCTCTCTTTTTTCTCAGGAATAGGAATTTACGTACTGTTTTCCATCGTAGAATGTTGGTCTGAACACACATCCAAAAGAAATCATTTCTGTCTG  
TAGTACTCTATGATGCTAAAATTTCTTCTTCAAACGATCCGAAAACACAGGAAGTTGAAGGACGATTGGATATGGCAATCAATGGGC  
ATAAATGACTGCATCGCTTTGAAAGACTCGATCCAATGTATCCATTTTATAACAAAGATGACTTTGGGATTTCCATACCGAGTGGCTGACTCC  
ATACAATTTGTTGGGCTTCCGACACCGACTGCCATCCAAGATGGTACAGCACCGTCTAAAGTCTGCGACCGATCGCTCTACTTCAAAGGTA  
AGTCAGCGTGACCAGGTATCGATAAATTTAGTGTCTCTCCAGGAAAATGAATAGTCTCGGAAGTAATAGTAATCTCTTCTCTGTTCT  
GAAGGTAATAATCCATTACGGTGTGCTGTATCGACATTTCCAAAATGATTTGTGTAGCTCCATAGTACAGCATTTTCCGTAGTGTAGTCTT  
CCCTGGACAAAACAGTTAGCATCTTTACATTTAGATCATTGCCTAATGCCTAATGTAATTAACACCTTCCGGCTGAGATCAACATCGCTCAA  
CTGATCCATACCGCATCTATATGCGCAATTTCCAAACATTCGATTTTTATGAATGCAATGTTAGATGATAGTCTTTCCACAGGAATATTGGACT  
TCTCACGAATCTACCTAATGGTCAAGCATGAAGGCTAGAATATTACTACGGTAAACGAAAAGGTCATGGTTATATAGTATAGAGATTTGGAATC  
GTAAGAAAGTAGATTTTATTTCTGTTACATTAATAAATAACAAAATACAGAAAACATTTACTTTAGCAATGATTAATGATTTGTATCTAGTTT  
AATCAATGAAAGATATCATTTTCTGTTGTTAAAAGTATGAAAAACGAAAAAAGCGGCAAAGTAAGCAGAGAAGCATAGATGATTTTT  
CCAAAAGAAAGCATAGAGTTTTCTCAAGTCCGTGTTCTTAAATATTATTGCTCATTACTATATTCTAATTCATATCATGCATACCATCATTATG  
CCATAACGTTAGTTAGGAGAGCTGTATTATATAAAGAACAATCATTCCATACAGTACATGTTAATGACCATCCTTAAAGCCCTATTATCCT  
ACGAAGAAAGCGAAAGATAGACCAACTTAAACATCCATATAAATTTGACGAGATCAACGACAGCTCCTTCTAGCCACCGAGTCAAGGAAA  
ACTCGTAAAGCAATCATATTAACGTTCTTTAAAGCATTGAAACGTAGCAAAATGAAATTGCTAATTACATTAAGCAAAAAATAATCGCGAAACT  
GGCATTATAACATAGGAGTGAACCTATTATAATTTAGCGATTGCAATTTTATTGCTGTAATCCCGGCTATTGAGGCTTAAACCAAGTCT  
CTGGTCTTCTGCTTCTGATGAACGGAGACGAACAGTTCGCTGAAGAAAATCCAGGGTATTGATTGAAATGCTCGTATTGTTTTAAAGTTACC  
GTTCCATCAGATGTGGTCCGGTCAATGATGGACTAAACGAGCTATTTTATATCATAAATCAAAGTCTCTGTTCCCTTGAACCTTTGTTCCCCAG  
TCTAATAACCTCAGGATTAACATCCTCATTCTCATGACGTTGGACAAATCTGAAGCATCCATTTTTATCCAATTTATCCACTATTCTATCCTCAT  
TTTGGAAATGGTTTCTTTAGTCTCTCATAACAGTAGACAATAAAGTATTGGAATATAATTAACCCAGTAAATGCTTATAACAAAATGAGCTCCC  
ACTAACGTATCTTATAGTATATATATATATATATGCTCATTACTGAGTTCAATCACTGGGATACGCCAGACTTCTGTATTGCCACGTCAA  
CGTATACGCTCTACAATGGGGACTTCGAAAATGCTTCTGACTCTTATGAATTGAGCATCATGAAACATGGAGGTTTTGTTGTAGAAGTGA  
ATAGCTAGCTGGGAGATACAGAGGAATCTGGCTGTCTCTGATTCCATGACGTAACAAAATTCATGGAAAAATAACAAACGGAATAGTTAGG  
AATGTTGGTAATGTTGGTAATTAATGGTTATAAATTAAGGATTTGCAATTTGAAAATGTTCCAGCTGTCTGTTGAAAGTAGCAATCTGTGTT  
TCTAGATGTTCAATCTTCACTGTGAATTCATTGTAAGCTGTGCACTGATGATTCTACAGAAGAAATCAGGCGATTTTCTTCTCAGTCTTCTTCTC  
TTCCAGAAAAGTCCGAAAGAAAGGATGAGAAAATCGGCTCTCTCTGTTCTGGACGCTTTGGTCTTCTGCTTCTTCTTCTTCTTCTTCTCAGCGCTGGGG  
TTGCCGAAATTTCTGCTTCTCTCGGTGTGTCAGGAAAAGTTCCCGTATTTTCTTCTGAAATCTGGTTATATCCTTGTGAGTCTAATTTCTCCA  
ATACTACTAGTAGTACTAGTACGCTTCTCTGTCATATCGATCCTTCCCTTGGACTTTCGACCACGGAGATCCATTTGCTTCCGTTTTTGTCTG

ggatagttcactttttgttcattggaattttgttcgaactcagattcagtagtgctaccataatcaattccattttgattttatcaccttcaact  
cattaaagttgtagggttaattgtttggcgccattacaatggactgcatgattccttctccacgtcaaatctctgtaggcaacggctctgct  
gctccggttttcaatggtataatcatccccatcaataatcagaaaactctcatcagaactgaacatgctaggagaagactgttcatcatccatcg  
ggactatagaaaacgccaccgcaacccatagctaggagctagttgttactgctgactgaaacttaggatatacagataaatggatcgtctctt  
tatcaacatgagattttcctgtaactgtctcgattgaactggactggtttctgtgggtaagactacagaatttgatgaaagcgagccgtaa  
cgcaggtgtatacataggttaatgcctgtgaaagagacatggatgctattgctgatggcgaggagttctttataggcgcaattatcttag  
ctcctcaattgtcttcaattctcaatctgatagctagcgatttttctgcaaatatcgcatagacatatcatagatcccttgatattctgattg  
gctaaaccataatagaaatagcttgcctacatctccagagacttctgaatttccccatctcgagcactcatgtgcctaatattgttagctttct  
gttcaaccggctctcatataaagcttagtattttaaaactttaagtattacagaataaattattaatttttagtgaattttctaccttttttagtgaat  
atcgaaccatcccatgataatgtttgtttggatgtggtagaatcataatattagttttgtaacatctgctgtgcatctttgatattcaagtc  
ctaagacgaatccatatacaagtcaagttgtagtctaatttttcagctattaatgctagtcttttagcacaaggaataaagatttttagag  
tagtcgagctacgaaatattactacagtgattttaacttagttcaatactatagattaagggcatacttttcaataaaaaaaaaaataaaaaa  
aaaaactaatagaaactttactagtttttttaaaatcatgatccattcctaaacggatgcatcaagtttgaacacggaatcattaaattaata  
ataataaagggataaaaagtccacttatgcatacataaccttaaaagcgaatcttctgttgaagattgctcttcaaaaattctcttctcattg  
gaactggtcactctacacagctcttatttacttcttccactgaagaagacctcaggagtgggtgcaagcaccaaggctctccgcatgtgagaa  
ttgcaaaaagtaagccaatttctgaactagcgttccccaacaaatcttcttgaacaccttgaatatcaacaccttgattaccatattctgc  
ttcaaccgatgaggatcgactggctggttaaatcatattttcaacaacgattccattgaaatcaacgaaggatttctgaatagtatagacca  
gcgatataccactctacggagtctctcatataaccataacgaatgagaccataccaagccaagattgtgtggactccagccattcgataatc  
ccattgacgacttggattatggagaccacctgaccaagactttcttctgaccagcaacaataaccaccagatactcaaaactgggtaaactaac  
ttcaacaatttggctgcttggcgaggtgttccacaccggcccagagcgcctcaaaaatgaagttgactctcataagtactctgctttcaaatgtg  
gtgtcataatcgaaccacatggattgggttccgaccagttgtacttctcatagcagcagcagagaccttgcacggcggtcccaaacagcgga  
agactcaacacggccatctggcaattcgaattgtcattgaagtttccaaaataacacgggctatgctggtctctgacttatacaaaagagagtt  
caaatccacagttgccaagtcagcacacactttcgaagcggtatgtgtatcgtggccactttcacgaacagcagatcgtgtaaaaagtactc  
atctaaagcaggttctgaacctttgataattgtaagcctcggtaaactctcaagactcatgttatatttctcatgtagggccgcaacaactgct  
caaatggctagctttagtttccgggaggaacaccaagaccatcgggacggtatctagaaagaccagttttgggtcatagcaggtgcaactcatc  
cacactgtgtatctttatagctgcacaaaaggcgggtacaaaagcttctgaaacttctcattttgtatacgttctgatacgcgtaaaagt  
catatcggtaaggagtggaggtgagaacgcagcaagtaataagttctgttggcattcaaaatcttaccgtagtgttaatttcgaaaataaagtt  
ttctaccattcccttagctaaatcagcggattatcagtgagcaaaccaagcgcctcaaaaagagtcaccaacatacatttcattaaaacggcc  
accaggaacaacaaaggggacaccgcaaggtggctctgtccttctcatccgtatatctttccatgccaagagcaagtaaacagggttatggt  
tggcatcccggaccactcttctgaattttttcgggtagatattccacttcaaatcaagtaaggacggtcttttgaagcacggcagtagtactca  
taaattccttttccggtaaggggacgtatagcggttcactgagtgaccagaacgatccttgggtcatggcaaatgacgtccaaagtactagca  
tcaattctcgggtaagtgatccaaaaggtgcctttaaataagtcgagaagacggcctaacaggatttctgttaactctacgctcatcaatcataa  
catagcggcgccatagctccttggaagggttaattcttgaagcaagttggacaactgataagtgctcctggagctcgtaaaagcagtagccgct  
gaactagcactacctaagaaacgacttccgtccagtgcttcaatggttatttgcataattgcgatcagtgctcctggattccagcaaggaatgca  
gagtttatcaacgtcaacaaaaattttcagggtctttatgttcatctaaactaccgcgccggaatattcttaagttcgggattagcagccgc  
agggtattctgctgaagtagagcgtacgtccgacactgagccaagacagtgatatactgtgctttgcatatagtaacttttagcattcaca  
aaggggtcactgtcccgttattctcattgacattattatcgggtgcaacgtactgagaagaaaatttggaggcatttggaaataaagtgaatg  
atatcgagagtgattgaagagagaagaaaataaaacttgaattataaaagaggtactcaaaaaagggaacgacagcagggaaaacaaa  
caacaaaaagttatcaagtactatctgtaatacaaaaattcagagttcaagaaacacacgcacacacacacacacacacacacacacaaagtc  
ctttttcgttcaacaagtaattagccttgcgaactgcttacttcatgaaggggaggttgcgaaaacgaaaatgtctattttaagcaaaaaga  
cgatgaattgatcctcgctgttcaatgctcttggtaacaactgcttagacaattgttaaaaatgagattttatgcaaaaatttggaaaaaaaag  
aaaatataaaaataggtatgagaaggcaattgagaaaacctattaactttttataaaatgatttttctgtaaaaactggaaaatattcctcctg  
ccaatattcttgcattctttaggaaactgttaaagataaataaaatcctcggcagccttgcataattgctgttgacgtacacaagcgttacctgatg  
acgcccgtcttattttaggttcaaaaacaaaggatcgtatcgaattccataggaaaatttacttggcgaatataaagttgtttttttccaa  
aaaaacgcttgttttactatttcaaacctctttttataaataaacataaattcgcataccggaacagaagataggttttaacgtattctgttc  
atctcagaataacgaaaatggaataatggaagaattctatagaggaagcttgcgaaggattctcattactgctggatttttttttttttttt  
atattggccactatgtcctcttctcataaattgttggactgttttcttacttgaggaattgtgggtgaatgttcgttctctgaatcttttgaa  
ctagttggacgaccataattagagttgtctttttttgttttttttttattcaaatgggtgcgttacatgggatttgtgagggcgttataaatatcatag

aaagaaaaatcगतatcattttaaggttggtttttattgagattatcatactacatacaatcgaatgggatttcaaggattgctttgctgcagag  
gaaagcacgttttatctcgattcgaaggggaataagaatagaaaccttctaataggcttgtttaaaataattttattgcttccttcgattctaaaaa  
taataagcttcttttttaaaagaatgaaaaagagattgaaatcgaatcaggctgactgggaatcgaaccaggctcgcagaatcaaatct  
catgtgctagccattacacatacaaccttagctgactgagctgtttagaataacttataagtttaaatTTTTaacaactctagactccattattgcaa  
tggtgacagcaacagaagcacctgctgatgggtcgcctataatccaccagggaagggagaccacgctcggattcttacagcaag  
cacataacatttactgtagttaaattactcgattaattaatcatctatacacttcaggatcgcactcggaaatataagtagtaacactataga  
agagctactattagatttagagacgattatcagtgatggcaagcgtgaacgagtagagctgttactcgattattgcaaatagtgacgatgattc  
ttcctattatagcgatattgtttcgggattgttgggatcctctgcaactcaaaaagggtattaagctatagctctatagctctaagtaacgctggg  
ctgatattgacagttgtaaagcactggctattcagatacaaaactgaaggaacctggaaagctgcatccctatttcagcagaatttaagaacgctgct  
gggtgacttcgcccggcgattacagcatgacattcagaagataggattcgaagctatgatggtagtgaacattcgggggagaagcatttggtt  
tcgattggtctggctaaataagatcctcttctactttcaatttagttaaccagattcctggacactactagcgtctatacacgtagtaacaagaat  
ccaattaacgtatacaattttacaattgtagatattaattcgcctcaattttattctcataaaacctgagaattactaacgtgttttttagacgtatgt  
attcatttttttacaatcaactcataccagtttgcactcctggagaggctattttcatatgaaacgcccagtgctgaaattgcaaaaacacgtcc  
accgtagctgtatttggtttctgataagacagagatttgcgtgaatacggttacaatgaatcagagaacagttatacaaaagctgattttcatttg  
gtgagccaattcgaatgtaatatattgatttgaataaagaagaagaaaaaagaagaaggaaaaagaagaagattctatatacaca  
ctattttaagtagtcttcatgatggtttccactttgtttttacgtttcattttgatacctgagcttgttactctgcgactcacgatatggtttgttg  
ccgtcgaatgtaggaaaaaggaagtcaggaagagataaaactataaaaaataaaaggttattttataaaaaataaaatcaagttctcttt  
gagagtattgaaaatatagaagtggtttttttgctttcgaattgtacgtttttgctgacttttagtcattaaaatgtcgctaaatattttcttg  
gctcatgaaaaacaatacaagctgtttatgaatttttataaaaaagacagcgaagctgcaaaaactgaacaatgagtttcaaggaacaaaa  
catgaaaccagtgtagccataaaatatacgaacagatcaaatatttacagtaacgattcatatgctacgcaaaaagatcaataattttgtattaa  
gtaaatgtatgaaatgtgaggatccataaagcaattaccaactaaaagtagagatgaaaaatataaatatcatatctgttttcaaggtctatatt  
tggacccaaaaaggtcgtactgggaatcgaaccaggctcgcagaatcaaatctcatgtgtagccattacacatacaacctgctgagaa  
ctaacgagtattagaactagttcacctctgacacataaatctcaagccgaggagagctgtttgtttatactttcaatgagtggtctacttccttag  
catagtaggaatgaaacagctcgtcttccgcatgttttcatctaatgtactaccggtgttttcaataaatcccatttcgagatactagtaataacct  
cagagtagtttacagggcttgctcctcaccagacaaataacaaaatttaagatcgaaaaaagtaggttgaaggtcgtaccgggaatcg  
aaccgggtctcgggaatcagaatcccacgctgtagcactacacatacaacctgacttgcggttcggaagcaaaaatattataagagac  
ataaattgagcacataaaatccttacatacgaagaagtcatttcagtcggattcaggattcatgataaacatgaattacaagttcaataggatg  
gttggtttctcaattctaaatgcgtatagattttctgttttctgaaagtgagaggatctattgctaggaacgttcacaaaagcagcttaaaaagc  
tacagtaaaaactttgtcaataaggtgtaagagagcgaactcgtattacacatcatttcgtctttgttctctcgttacgaagttttcatttatagtc  
taaaccatacgaagaaccagcttctaatgttttcttttctccagttatgcttacatgcttttcttgaatactatccttcttcaagttt  
caagcaggccatggtattgcaattcatatggtacaggaattaggaagaaaaacctattccaaggcttgaagacataatctgtttctttcattc  
attcattcattcattcattcctttcttggttagaatattgtaccttttagtaaaaagttactccaaggcgagactcgaactcgaaccttctgataa  
ccatcttaagagtcagacgctctaaaccgattgagctaccgggactttcatatataaacttttaacagatataaagatgaacatttcaattga  
atatttgaattgaaataaaaaatctaggtctttttttatttttataaaatctactatctactttcattgaagttactaaaaacaacagtacat  
gtctcgacaattgtttccagtaaaagttgattgtagtatatacataggatattcatggctcgggaaacgaagtagcataagctctattatgacaaa  
catgccaacgaaatgtgcttttaaaataagctttccaaaattccaatttctcgaatctctcgaatatcaatcggatcaaaaaagattggtgta  
aagcaaagaccattgaaggaactcaagtgtatgcggtatacaaaataggattgggttaattaacaatgaagattcactgtcatcttaataa  
tcgtaatcatttctcacgagtttcaaatcgcagtagcatatgtttatctgaaatcagaataaagagacaaaattatggtctccgaaatggtata  
ctgacaggactatgcatgcatccgtaacaaatctcaataaaaaatccaattttcttggtattctatcatgatgaatcttttttcaacaatg  
tgtaaagtactgagttaccgcccgtaatgatgttctagcatgtttgttcgagaatcatgctcactttgcatcaaacgacatacttctttgttcttt  
ttaggctttttccagcagctgctccgaagaacgaacaaaaactagagagtgctgaaagtagcagccggtaaatcatcttcagatgagctttta  
cctgtaagtggtctgagccaaaaaataacaatacaacggactgtctcgtcacattacgtgaagcgattaagtgaataatcccttcgactgct  
ttcccggatgcaaaaagaaaacatttctagcagatgtaagctcaatatagttatcccaaatatagtcataaattttcgttcttcatgcatatt  
gtatggtttattctaccagttaccacctcaggtatgttgatgtctatcagtcgaagttttgttgcatagccattctatgtacagactgccaggatc  
tactaaaagcgaatcagatgactcaaagcatttctttttaccatcccccaaaaacaggggtgcttcatggataagtacaaccaagacatc  
ttttgaaaaaaatcatttgaacataaagctgattggcaaatgtttcagaaagggatcacgaagaattggaagattagtttttccagttctc  
aaaagctttttgctgatacgcgtataatcgtgaagctgctaacatgagcattttcaggattggccgatataatttgggtcgcagcatct  
ccagaactgggactgtatttctgtaaccttatctactgtttcactgcatgccgtgatgcgtaaacatatagcaatcgaccaggggtaaccaatc

aaactttgtgctactgctaagcagaacacttatagcatccaaactatatacctccttctaagaagcgaactttcccatctgccaatcccatta  
acatttgggtcatatgagcataagctgccgggtgactaagcactggccaatatgatcaccagctgcagcatcaaagccagaactaatgatcacc  
aatcaggttgaaactcataagcaatcggcataacaacgcgttggaaggcatagataatcaccatcacccatgcctgagcatggccatggaa  
tattgacagctacggcctaagcctgcacctcaccacaatcttctgcacaacatatactgtaccaggataaaatcttccctgttcataacgggtgaag  
agaaatatacaatacatttggatcatcatagaaagcattttagtaccattaccatgatgcacatcccaatcaacaattagaattctttttactttgt  
caggatatacgttgaagcatgctcctagcagcgacagagacattgttaaataggcaaaagccaccaggtttatgaggtccgcatgatgaccagg  
aggacgaacaacggcaaacgcattttttacttttctgtaacgacagcagcacaagtttcaatggcactccacaagctagtctgctgcaaaaag  
cactctcattattgaagtacaaggagtcactaatctttcaaggttgcaagatcctctctggacattaattcggttttataatcttctacacattc  
tggcgtatgtacccttaataacttccaaagtagcttcccttgatggaaaggcgaagaaaagcatcagcaggacttggagtattagaacgtaac  
cagcctttctaattgcttcaaagacacgaagcacacgtctagggtccttgggtgatcatctactcattcagagttgcatgaaatcgcacccgtgg  
atcatacaaagaccggatttctaatcgttctaagatcctgcatcttcagaagaaatgagagtttcttgattacaatatgattttctctttta  
caatattgaccaaggtgtaccgtactaggtccgtcgtcagcaagtttctttccaaaaccattctagtttctgctgagcattcgaagagaggaa  
tttaatatcaattgaattaataacgatagggaaaaagaaaaatttacaagatcaccaaggttcgacgcggttctctgataatgcgtgtacctg  
aatccggttagtaccattgggtatagtaaagtagtaagttttgtatggagaaaggagagattcaagcaattgagaatttgagtgatagtttct  
aatacattttattgttccgtgtattatattatagaaaatcaatctacgcaaccttctctcaaatccaaatccgttggaaatacaagtaagta  
catatgaaaacgaaagtacagttcaaatctcatcttgagaagtagggagattctggataatataaaataacatggcattaaaatataaaaaca  
attcaggaaaagggtactcataacaatagacttaagggaaggttcatttccggttactgaaagctgatcaaggtcaacaaaatctatcatcgt  
aataatcttactaatttgaaggattctcgtacttacatctgctgaacgcgtatgaacgaaaagacggttccatgtacaagccaaaaacatgaa  
aatagaagcggctaaatcaaatctatttctcttttcttccactttttcttcttttcccctgttcgaaaacaaaaccccagagcttctctgtaag  
ctattcaaagtaagtgccgcaaaaggtattttgccttcaaaaatggaggggtagagagggtcagagaaaatataacttcaacaaaaatc  
ataatgaataaaggaaaataaataagagaatagcgacatagaagatgataaccaagtgttgaaaaatcttcagcaacatgacacaaaataata  
atcaattccagtcaacatacaaacatagcatttacattagggagtcagttactttcattctcagaacttcaaaagaaatattcccagaaggaa  
cggcgtgaaccaaacttaagattgcctctgctgccttacactcttacttgaaagagaaaaggtaccgaaggacagttgctaaggcctttggct  
tatagagctctgaaggagatgaacaattcatcatagatccaatgtgtcctcctctcatgcaaaaaggcaatgatgactgttgcataatagtagat  
ttcattcatgtttgtaggagaagaacaaggagggtcaaaggggactttgacttctcaacaaagatcatgcgaattcaaccacggagggtc  
gtcctgtctaaagacgatgacacagaggtaggactagaagaggaaaaaggcgaagaaaatattagaaatcaattgtaagaaatcttgcgt  
ggacttatcaatcgagagaaggaattagcgcgtgtcttaagtggttttctcaaatggataagccttctcgaattcatggtatccaaatcgtttat  
agaccgagacctacgatgagcgttttttcttccgtatcaaaccttgcacctggccaacgtttggttttccaaccacgatcaacttgaataccg  
cgtatttcaaacgcgccttcagcttctcagacatctaaatattaacgttaataataattgatattatcaaatgaaaatcaacaaacaatcccacga  
taggtaattgtaatggcaattagttctcgggacccttaaattcaagaaaaacgcgaaccttctcaagaattgccagaattggttttgaat  
gcttttgccttgccattgtcatatcttactactcaagctccttattcaagcaatgcgtcgtactactagcaacttctattggttatttagatcg  
tcaagactttaataaatcaacgttaaggtccaagtttaagagtagaaaaaacacagatgaatacactaagtagtactcgataaattcctaaaa  
aagaaaacgcgttgttgatggcttctggtaataagcaaaagcgcgttgcttactgcttaggttaggttggtaataatattagtcattgataa  
cttgttaagtagcagacttaaaagctttagaattactcatttagtactagattaattttatttattttagtagaatttaacctggctatcaatttagc  
cgtcgtgaacttgcatttcaaggcaactgtgagttcaatgcaaatgtgagagccaaagatctattaatacatcattataaactatatttattc  
ctattataatcccaattctccatttttttctgtccgatgctgtaaaaggaaacgaaacgaaaggagcatgcaacaaaacaaaacttttagaaa  
aaaaataaccacaccagaataagtaataaggcttatctataaacctccataaagaacctttatctctagatttttaccaccagaggttagca  
cccgaatctgtcgaagtctttaccatttcgagcaaaccaatcggcttctcttgacgttctttcaacatatacttgctcttcttctgcatTTTTTg  
tgatacttctcgttctcctcggccttcttagctttacgcttcttcttatcagacttgagcgtcattaccttttgcaataaatcacgagccttcttca  
tctgcatttaacaagacagtcgcttctgcatgtaggtaggcttctcagaggtcgaacttcttaggacgagaagcataaggaagctgtgcttga  
aagatcggggaaccttgagaggattgaaatgtcgagtagggcgaacaatttcttatattgggaattaggacgtaattggagtttcaaccaagt  
tcatggcgtacttctctgcaatctcataccctcactcattcttactggttcaacaagttcgtaacctcgtacaaaattcacgaacttgaca  
ggataccatgctttaaaaaacaatatcactcatcaacaccttactcctcaaacgtcgcacggaaatgaccatgttcttatacaccgcttcttga  
cttgcctcgaataccggaaactgcctaataattgaccttgcacttggcaacttcaaaaggactattgaacatcttttaataaatgctgtattct  
tgaaaattttagtgaacaccagtttaattcagcttcttacaattcactcagttggttgacgtcgagaaccgtaccagtagcagaacttcaaa  
actacgtccttgggcaaatgaattagcaacatactgcacggcacaacaaatcctgtattgggtgcaatgaatggcctgtaaaatgtagcaagcaat  
gcatgtgctctggggtatacttcaacatcctattcctagtagcagaatcactgatggaataaacgggaaacggactgtacttctcaaccaagct  
aaaaattaacggatcgtttgttttcaggatcttcttatgcccagcgtatgcttctgatacagagcttgcacaagtccatatacgttgcctatttggcaatag



accaccaacaaccactggataacgagaatcgaactgttcaacaaactcgtatggaacgcctttaaaaacgagacgtacatacgcaccagcacg  
atatcctcaattctgctctactctcggggtccatgtccttgaatgcttctctgttattccaactgacgagcaatcttttctttcttccatacca  
atcaacatcttttcttggatgccacgatcttcttcaaatcgaagttaagctctcttttacgagcatttctctctgcttcttctcaaatc  
aggagcatcagaagctcgttctccctgggtaccagatttctcattatcaactgacggttccaccctcattattaccgtacttctctgctct  
aatcttcaaatcagctgttcttctctctctcgtcggctccttctcattctcttgggtatctagcaaaactcctgtaataaaatgatattaa  
gtcagcaaggcgttcagaatctcactcttattataacgttcaagtcttctcgaagaatcttttcatttctgggtgggagttccaaat  
cagcctttctaggcttaaagaagtcatcatcaccttaccctcatcgttccatttccaccgtatccaatggcttccatgaatctcagacaaa  
gcttgttctggcgaagagactcatcataaaacttttctgtaagttcctgcgccggcgagcagattcaatgaaggaggccttagctcgca  
agccataccctctttcatttcaaatcagacgatttcttctctctctctctctctctctctctctctctctctctctctctctctctct  
cagcttcatctcattatccttagctcctcaatgtttcagagtaaccaacgtcatttctctcagcagactcatttccagagtattgcttatttcc  
tcaagatgagcatatcgtcagaacaataccggttgggtgacgtcgtgcttttctgccacatcagatgctcttcttctctctctctctctct  
cattgggttactgaaaagtggataccggtgaaggattgcaccaagggtgatgagccttctgtagttgatgaccatacgttcgccaactcc  
tgctcagaattgcatctttgaaaaattgaggtaggaacctctataaaacagcatttctctgaaaagaataccaccgatatcagccatagg  
accataaaatcaattttgctttcagaagcctgctctctctgactttatcagcgtctggtggaggacaggggtcatctaattagaagcatcggcc  
acattaaagtccaacgcctgggatgtgaactggtcatcatgttttggtaagttgtaccatggagataaccataaagggtaacgtacgaga  
aaccttaggattcttcaattcagtaggtaacgtcaaatcttccatcgcagcagcaagtaagtaggtagctgtttacgccattgaaggggcg  
aaattcataacgctgataaaccttgacaaattcaaaattcacggtcaggataccttccattaagaacacctgaaagataaaataatttgcctcc  
ctggtcaactctgtcAAAAAGGgtctcaaacgttttttgctgcacgaagggtagcaggtttttgaaataatcaagtgggtcaacacccc  
ataattcggggcattcctgaggtgctaaatgttaagaaattccatcgtttccatttcaaatcaaaagggtcacaataaaagtagaacaaga  
tcagcaatcttgctacatcaatcatggaactcaaatcattaggcattccagaaaagtgttctctgtagttgccaagcaaccacagtaatagga  
cccgtatattagatacagatatttagaatacgcgaaccaaagatttaattaatgtagatttctgctcaggtggaccataacagcaaca  
attacaggtggcggcattcatcaggcgtacgatccaccatgggcacgtgcagcttctttgagacaagtctgagttctcatagcttctagcca  
tacgtcctcgaagccagcgaatgcctaaattgtagattactattccaacgaagaattccctaattccacataccttggattgctctctgcat  
tgccattgggtgcttttcttctgacttttcttctgctttaggccagaatgcttgcataatgggctttttctctccatggccgaaaagctagtgtg  
ggatgttggcaagagtagtactctgctcatagaaaaatcaggtacaagtagcagcaggaacaatacagtgaattgagaatgctattag  
tagaaattcttttttttttttttttttttttttttttttttttttttttttttttttttttttttttttttttttttttttttttttt  
actttagtataacgcgtacaatagagaagttgtataaataaaatgcttcatgatcataatttcaaaaaaactttaaactcataatata  
gggttcaaaagagaagtctgctccttaccattcaaccagctcctaccaacgatacgaacggccataggacttccacctgctcctctcca  
acatatagcttactaaagacgcagagagcaattcctgggtgatttccatgatgacgaaaaggccgaccagcaatgccaatgatgatt  
acaatagacaaagattggcctaatctatcttatacctcaaaaaactccttaggagatgttaagttagaagccgagagaaaagtctcaactc  
ctgggggtaacgagctgcttagggatacgaatcgggcataaacgcaaaaatgccacactccgttcaataaaggagcttgttctgctatcg  
tccgtcagctatttttttagcccatctttctgccaattctgtatgtaaatcgtaaattcagggatcaccatggacacttttctgtaactgtg  
cgagtaataaatcaaaaagatctgggtctgaaaacataacaacaggcagagcttctaatggaaggcactagacagattcactgatactt  
ggcttccagctgtttacaacagccttacagaagaattcagatcattatatacactacaggtcctttgtttgagcttctgaaacgtccctttag  
tagactagtagtttctgtaactggtgcttactcttggtattttgtccaacctggggtaattttccgtctctgagaaaaaaaagttttgagatc  
tttgtttcagacacaggtttggttatgtcactttttaggttctatgatgttccaataaataatagcatccttctgggatcatccttgaatcgttctt  
caattcctttcagcgtggaagcatgactctgagttttcttagttcatccttttactctgctcttcccttcttttcttttccgttctcgccttcaaa  
agttctttccttttctcttttctttctgcttcttctctctctctctctctctctctctctctctctctctctctctctctctctctct  
cttttctattcagacttgttctcttctgctcgtatcttggatcgttgattcaattatcgttttcttttttatttcttcttcttggcagctttag  
atgctgaattgggagagttgtaggcttagcattctcaactgtaaatggggataggaggtttttctttaaagatcctccgttccactaatttaat  
tagttcctgtaaaagaactcagaaggaattcataccgagcaaatatccgagggttcatcattgtataaatcccaaatatctccgcatcga  
gaccgatattggcaaaagaattaaaaatctattaattgagattgactgtgaaataaattatcattattagtttccatattagactttcaagcaaa  
aacgacgattcacctaggaatcggcgttacaagtgaacgtttagggtaagcatttactaggattggagtaatacaaaaaatagcaaaaa  
aggaagacataaaagtccattaggagttaaattctattgtgaataaaaatatgaaaaagaataactgtcctttcaaggacgaggacaaagtc  
tattgccattcttgaataatgaaaaattctttaggatggaaggatgatataaaaaacaaggaattggagaaacaatcttttactaagaaa  
atttcaagactaaatacagaaaactatgatcgggattgcaaaagattgtaaaagcataaaaaagattcattcagcatagaaactctgcaact  
ttgagaacaaagtagcagattaagagcgttctggcAAAAATAAaagtaaaatagttagaataaaagaactgtaataataaagtagaa  
gagcaatagaagatacggtagcatatataatgcataacaacgaatttgaattgcattaaccacaatgagggcagttgaagat

aataaccagaatagccactaagataattaaacaaaggctacgcttccttgccttctagatcttctggttcaatctgtaattgtttgaggcat  
ttttagaattcgtagcagattcccaatggttactctatattcgtcactagctcctcctgttcattcactattgtgcttaaatcgctaaaaattggtt  
agtagcagatcagcaaaaaagaatccggtttcaaggtcatttcatgaatttaataaaaatgaataaacgaacgaatacagtaaatacttacgg  
aagatgtcattcaattcgccgattccctgggtaattgttcaattcacttgacgttcgtgaattaatcgctgctggattccaattgagagttcgac  
agccttcgctgggtatattgttcttggctactccttctcctaccagagatcttttgcagctcctcttctgcaattgcctgctgacttgcgtcttgatt  
aaagctgcttgagctcttacagaatctgttcttgcctgagcacatttttggtaaacacgttgaagttcagtaatacattattaaagtctcttga  
agtttgaaactgcaaaagatgatgcttcttccaaactcgagctcgaatgttgaaagacgaatcagatctgatcgtacgttttgggataatt  
ctctgacttcttagcaaatcatgtatatttttgttatgttattgaccaaatactgtgaatagcggctgtgttccctgtaaaatgtgaatttttga  
gctattgtgttctgactgacgcaaacctccattctgatcagttaaattccttcttgccttaaatctgcaaaagacatgatagaaattaggcatat  
atatacataaagtgcgaagcttagtagtatccttctaacaactatgaaataccgtccaacttgaaagcgagacttccggttcttccgtttttgac  
ttgtaagcttaaacctcattcaactgcaatttgacagcaattgctatttcagttattgagattatcaataattagtttggtataggttagggata  
attcgattactatgaaacgaatcatagcacttctgctatttgcctccgctcggtaaacgaagtaacaacgatgaactacaagctgaataa  
ggcatttaaggaattcaggcgaaatgcagttcgtacgttcaaggttgaataataaacaaggaattcataataaaattgaacagaaatagtaa  
tcgagttaaggcagacaattaatgcgcatctaaataaaggaaaaaaacaaaaaagaaatataaattatttagtcgtaactatcttttatatg  
acttaaatgatggaagtacattaataatgcaatgggaaaaacaaagataaagtaaaacaaaaaagttgagtaacgttataagcattgaacg  
tttaaaatggaaaataatcccttaagaaaaaagcctgcttcttgaagcttggggagaaaacagaatccatcggtctattgaacctgctat  
gttaagatcgattctgatctactctcagaaaagcatccaaagaatgatttgaagaaagagtaggcctaatacttagttctgtaggtttttctac  
gttccctacatcaacattaagaaataccagaaaatgcagatcctgtttattgacatgtagaatctcggagatgatctatctgattatgcttca  
gtaacgttcttctgtcttcttatatttcagtcctcagtgaaattcgtttgtttttttctgaccttgttttctgattatagtatattcacgtaacat  
tgtgacttataaaaagcattgactaagaatgcaacaagagccaaactgcaaaatgattgaagttatttggtatgctgatttatatagga  
aaacagctttttatactttttttgaaagaaattctattgataaccactcttctctagcaatgatcagactggcaaaaaagttcgcgtaaatgc  
atgcctgacgatactataggtgacttcaaaaagcttgttctgctcagacaggtacagatccaaggtacgtgtgcttagaattgtaggaaatggtt  
tattgacgattcgtaggagaattgttggagaaaatggcatagcacttacaaggacaatatcacgttggccgactatgaaattcatgacggaatg  
agtttgagctttactactctaaactagctctatggttatgttgaatgggatagtgcaataaattcatggttctgttttaggttcttgaattcta  
gaacctagatgtttgagtttgaatcataatctcgtgaatttagcttcttttatgaaatccctgttttagtaaggaagttgatgaggctagct  
ttgtcaaggaaaaatcgatgcaaaagcttccatcaatgcttcttctatcaagtttgaactatgaacaacctatgttcaatagcattatttctct  
ttctgaattgttaaagtgaataccaagattcaagtttgggttacaatttctcactaactatctgaaatgaaaggaatgttaaaaaaaaaata  
catgaaaattccagttctccttctgttggggctctattttacattatatagtttttagctgtttgggatgcttcaatgtcttgaatttgaatat  
ctaagatcggttagtttggttgacaatatgtatttagcatacccaagcttattcatatgaattaaaaaagaaactttcaaatgaattcaa  
ggattcgtatgaaatcatcatttacgtcttattttggctcgtaaagaggtgaaacaaggcaacgaaaccttcatattagagactatcaagatt  
ctaaagttggcttctatagctaaacatcctaataactcgtttattcataatggtttcgtgaaaacctctacgcattttactcataaacctgaag  
gcagactttctatcaagactatactgctcaccgcaaaatataagagttcaacattccttctacacagtcactttttatcttattttttcttttg  
gtctatttttgaattaaaggaaaaaatttgcctttatattgttcttggaaatcttttgaattcttagacacatatcagtttcttggatgaaatg  
aaacgggggactattttgtcaaacatataatattactagaagcttcatgtattttgcttttaacggcttttgggttctaactcgtagcactttct  
gtgttgcagtgcaactgccttgcgattttcgaactaagtcattctttaccaatctagccataataatcttaataactctgtttttttattcca  
tttactttttatcttattcttcttcttctgttgaactatcctgttttgttgaacagaccagtttccatgagtaatccatactgtcttatacactgaa  
cagacctgttctgacctgacactgacgtgcacaacggtcttctaactccaggaaattacgaaaagacatgctgtttatggtgataatgatttaa  
ctgttgatgataatgaatccattatcgtgcaatttctgaaacagttcattcaggatcctcttattgtctgttattcgaagcgtgctattcaattat  
attagaaacattgacgatcgttcagttattgcttggctattttatcgtggtgacagtggttattgttcaagaataccgctcagaaaaatcttgg  
aagctctaaacactgtaccgactactgcaatgtcattcggctggtgctcaacatatggttctacgaagctagtagcaggagatttgatt  
actctacaaattggtgatcgtgtcccgcgatcttctgtatagtcgatcgaatgtgaaattgatgaatcaatatacaggagaaactaac  
cctaggaagaaattcagtgaaactttaaaggctaatctgcctttaggtgaacgaaacaatatggcatacatggcactcttctcgtcatggtcatg  
gtcgtggtattgtattgctaccggagctgatactgaatttggcgctgttttctcaccgtgcgcaaacgggagaaacaaaaactcccttgc  
acagatggattatttagaaagcaactgtctgcatatcccttatcggaaatcgcatcatcgttctagtcggattttccaaggtaaaaattggct  
agaaatgctcactattggagttagtctgctgtcgtgcaattccagaaggacttccattatcgttaccgttaccctagcattgggagtttacgga  
tgtcaaaaaaagagctattgtaagacgcttccaagcgtggaacgcttgaagcgttaattgtatttctcagataaaaacgggaactcttaca  
atgaacctatgacagtaacgaaaatgtacattcctggcatgatacacttgtttatctgatggcgtatctcgtattttccgttgataaaa  
ctgtcggatgaaacaaactctgttaacatcggcttattgtaacaacagtaaacgacatgtaaaaaaacctgaatcaatccttgatacaacaaatc

catgggctggttttctgttgatgttccttaattgaatgctggaacgctttggctaaacgaccaagaagttatacactcgattatcagaata  
ccattcaatagtgagcgaatacatgtctattatgccattataactccacaaaactactttatgaaaggcgtatggaacaggttttgaac  
attgcttactatacagacaatgctggaacacaacatgaattgacatctactatgctgatgaaatccgtaaacacgaaatggataggctaaa  
acgggactacggattatcgctgcagctagtggttcttctaataaactagcttccatgggttgggtataaatgatcctccaagaccatacgt  
tcgtgaaagcatccaacaattaatgactggggcgttcgtatcataatgattactgggatagtagtattgctactgctgcagtagctagggttag  
gcatggctataccaagcagtgatcaagaggcgattcaaaattatgcaatcacaggtgatcaattggatgagttagatgattcatctgttcgagatg  
ttgatctcgagcagtagttttgctcggcagcgcgccatcataaaatgaagattgtaaaggcttcaatcgtagacgatgtagtcgctatgac  
tggtgatggtgtaatgatgaccagctttaaacttgccgatattggcattgctatgggcccgtcaaggactgacgttgctaaagaagctgccga  
tatgatccttaccgatgattcatttgaactatttgcacgcggtggaagaaggaaaaggtattttaacaacattcgtactttatcactttccaac  
tatcaacaagtgttgcgcatgtcattgattgcaatcttctctatttggttacaaaatccgttgaatgctatgcaaattttggattaacattt  
gatggatggaccaccagcccagagccttgggtagaaacggttgacgacgatgtagatgaaacctcctgctcctgaaatgaccaatttga  
ccgtacagttactaaagcgggttcttctgagtgctttattatgtacttgaaccaccttagtattcaagtgaaatgaaggatggccaagtaact  
gctcgagatacaccatgaccttacttcttggtttggatgtttaatgacattatctgtcgttccgaaacaaaatccgtattcaaatggga  
atattctctaatcggatgtttaatcgtctgttggaggatcattactggccaaactctgtcatctacatgcctctattccaaaaatttccaaca  
gaagcttaggtttaaaggatattgttacattaattatgactagctctgttgggtgacgagcttcgaaatggatcatcaccgaaaag  
gccttattcgaactaagagtaattacatcttaggaaacgttgaacatttgatattgtttaaatttctactcgttagatttaatacctaat  
atgttagagtcggcaaatctttgatatttaggaaacgtagtacgccatgaaactatattatagcttatgtaagttagtctgattattttaa  
ttagaatctgttctgatgtatagcaactgtaaaagtcagtaactcaatcgataattcctgtacaccggtttgattcaccggtcctcgtaatgc  
aagttggatggtttgccaagaatgtacccttttatcatttatttatttaccagctgaatgattttcactgttcaattcctttctgcatt  
taaagccaatgagtgtaaaaattcctacgctatcaacgatagccttctctatctatgcaataattatttataaaagttttaaagtatta  
cactactaaagcttcttatttctgattgacattgaactgactgcttggatgatcctaccagaaccgaatcctcaacgaatgggcaattgttcg  
aaaacagtaacaattataggtctattcaactaaaataggtctaaagaagatgaggttacctcgtggttaaaaactcgtcttggctgtggac  
tgctgcctgtcacgagcagttcaacgtcactactagcgttggcttcaaaaagcttattggatcaattctcaagaaaatattcgtcctgaggata  
tacagcttctattatcaaaaggggttgggttcttaattacaactaaattgcgagttcttaaatgcaattgtccatttctaacattagagat  
taaagggaaatgtgaggaaactgtttgcagtaaatgttacagatctgtcaattgaaatgtggagctcgaagttcaaggactgtcattagacg  
ttacatttcaaacagatgaatcgatggattccacaatctatcaagatgcttcaactgacatttggataacgtagtcgaatacatgaa  
caagacagcctcccagacttggaggagggttaaaagcggaggactggacgatgaaatacctgataactcccgaatttcttgacaatata  
ttacaaaatgcttcttacttccgtaattatagaacacctaaaattggactcaagccatcccatacctactgcttggaaattaaggattga  
ttttataactttccttcttataaacagctcattatcaagattattgaatatacgggaataactctgggtatgctcaagcaagagaataacaccg  
ggcctcgcaattcatcatgttctgaaggtctgtgctctctaaatacctcaaccttagtaccatggaagatgcgagaagtttttacgctgaa  
tctgagctctgaattacatgaaaaatgtacgtgagtggtataaaagaaaatgaccttctcattctccttcaactctggatgagcaaggag  
acaatcatataatttttccgttctgcaggggaattcgtattgtattcagcgttgaagtctcgacattgttggtaatagaagctcatgttctcctt  
gtgttctgattatctcccaagatgtgcgttctgatgactgtatagactattcactgtttatccaacgtttcaagtggtggatccgatacagc  
aaaatctcgttaataatattcagttggatattcatatacttcttcaagttgatattcattgtaggcaagctgatgcagtcgactatctattcc  
agcaatatacagatcagcttattggattcctgaaaatgcttactctcgaatttttaaccaaattcagatatcaacgacaatcatgacc  
ttaatgacctttcatgacttttccaattttggaatattatggatgtagtcccttatatcgtttcataaggccctgactcttctgttcaattaatc  
ttaatggaacttgcagtcgacttcaacttgagaatgtcaagcgtgaaatatcttccattgaaaagtatattaatcaggaattctt  
attacttttttaagattgacaatgctacaagattctttagatggtttactgaggttagcagacgacagaatgcttaccagcttcaagctcagtt  
aacatagaatcaaagtgccaacaatcgagattatagcttattgatcgattcaatttcagtaacaaagcgtcaatccgaacaactcatcatt  
gctttctatagctgccaatcatttcaacttactagaaaatcttgggaacttttctccgtctatttttctaaaaatgtaacttttaacatagaa  
ctctatttctcgcctcagctcccatggaaaaacatctgcagaaaatgtttgcaatctcaatggcattttgagacacattcagtttccgggtt  
accagaattaatgttttcaacaagatgaatttatcaccctaaattccacaaggttaactaataaaaactcctgtcatgaaaaccattttacg  
ctgctttgatggactacacttgacaatcaataaaaaatgaatcacttgaagtcattattttaggatatactgctcgttcatcaacctgta  
actcctaaaaatagtgacgcccgattacaaaacttttaaaaatcggaaatcgtattttcattgttatctaccacgaggatggaagttctt  
tactattacggtctgacagaattaagcattatagtcagattggggcagaattaagaagcttagattctcgtacctacaactttcggcttattt  
ctacaaattttcaacgatcttccactctatcagtcgtaggaatctaaaaaaggtgaaaaatattttaaattgtcaatcacgtttccgctc  
aaaatcattccgattctgataacgaaatacaataagcatagtcgatttaggatagcattacatggccggttttgggtcactagtttggga  
aacgtacttttcaagaccctgatgtcccttttgaatttctgaatttctatagcataaatcttactgtatctgactgcattttaggattgaatc

cgctaccgggagtgcaagttgttgatacatctgaaagctcttgaagttcacattgacgccattctttaaaaacaacggtaaacatcaagtgcct  
caccaatgaagcctttttatacataattaacaaattgaacgaagatgtggttctgagaagaagtcattgtttcaagaagaactttgaaatccga  
acttatgctatcgcaactgacggttgatgaaaccattggtttcgtgattcagtcattgggttatgtgaattggcaaggataactggcttaagtattg  
aagttaccatacgaatcaataatggagatctggctactacataaatcttactaatgctgattacatatccagtcctgagctgacagcactgaa  
gcttctcaattaatttctgactttccggccaaatgatgatgaaacgctcaagattacttagtatccccgatgtcaattacgcagaccttcttag  
ggaagtggacacagaatTTTTTgtgatattgtaaatcatagaagctcgaggtcttagatactgatatttcagtttagcagtcacactctcgatatcg  
tcaacgactattatgcttctccgatgggtcagtagatgaatcatttcagttgatagcttcaaagggttctcctcgaagtgaaagcttatcggatgaa  
tttgatgacctcaactttctgatgaagaagacttagcgtcggaaggttaactgaaacaggatattgagcttattgaggatcatttttgatcaag  
gatcaattgagcaccatgacatggatcttggctactgattacaatttcaaaatgaattatcctaataatcgtgtagtttgggaattatacagtggt  
tacgactggaattcaactagacaagctatatctgaagctgttggggctttgtacaaaatacaaaataaaaagcaagggccgaatcaaaactca  
tattttgaaagtatctgttggaggattttctcaatttggaaaactatattcgataaaattgcccaagcattgacctggatgaccgaacagaa  
gctttttcaaaaatgataggcagcacactttacggttaggccgggtcaaaaagtaataaggtagtggttgagataatcgggttaatggggagtttc  
acctcttacgggaggaaaaagttcaaatgaaatttaagtgaactggatcttggcatgaaagattggctattacgatcatttgccttctcaa  
cctggaacaagttttcagtcgtgattctcgatcgccatcatgaaaaataggaaccaacatgaattttaaaattgctacagtcgcacctgtacc  
aggattaacgaatacagagttacgggtggaattgggatcttgcctcaaagatgatatagatcaggacacgctagatttttaattcggttttt  
gcattcaaatcggaagtcggacggaaatggaagcgtttactagagaccttccatttttcaatctatctgtgtacatgctactcattttagattga  
tttaaatcaagaatcctgatcctgcaggaatgaaaagtggaagattactgattttgaaatttcttgtggttcagggttctgaagtttttaag  
gcaattgcaaatctacggctgtctggaaccgaggattttgcatgctcttctggctatctggtttcaagatatacgtacaacatcaattgcacaag  
gtgcttaattggcatagttcctattcgaacacttttactgttgaagcggagttaaagatgtatttcttctgttaaaggtttacagagaaaaca  
ctcgatgagaaatctccggcatggagattaaaattactgaaaaatacgtaaacggtttttcttgaatgctcaaggaatgacagggacgca  
tgactattgaggcatgttgaggaataactgcaatctcgagagaaatcgatcgagaagattcagttattacgcaaatcagccggaatcgttgg  
agcaaggttctggaaggttatcatggattccggcaaggttagttggagcaaaagacaactacaatccattccaagcgaagcttctcgacgt  
gcaagtttaggtagtgctgctcaagttgtggcaagaaaatgccattagcaatgctgaagccgatgggtggagctacagaggcagtgcaaaaac  
cttgttgggtttatctaattcttccaacctcaacgcaggcatgatctcgagaaaaatacaaaagataatcttaacaaggttttccgaaacctag  
gattgcttgtgattacatgttcagtagaaggcttactgtttctcgaccacttattatcaaaagaaatgaatcttatttgaatagttcatcaga  
agtggttagcaatgaaccgttgcacggaggttcattactatgttattacgaatgacgactgccaattcgggtgataaactggaattgtttttat  
gatttattccccgagatcagctgggggttaattgttacgatgacttgaatgaattaatgcattctaattgtgactgctagggcaaaagaattgc  
agtttaattaatatttttaataatgatcgctagttgtggaatttgcagaacattcgtttttagtgatatacattgatttttagaaataagc  
ttcagtaattagatgaattgaacatacgtgttataaagccttttgcattgtctactaaaagtaattaagagtcaaaaaggtcgggtggaag  
gtcgtactgggaatcgaaccaggctcgggaatcagaatccacgtgctaccactacaccatacaaccgacactgttaacataggttgatata  
tactatatattccgcacaaatatactgaatattaataaatcaattcttgcattcgtactaaaagtaattaagagtcaaaaaggtcgggtggaag  
atatgtattacttgacaaatcttacagataattacagctacgcttacaatgctacagcttcttcttaatatataatcccgcacgcgta  
attgcacctcaattcaatgaatgtaagtaactggaaaaatagtctactaggcttagacttgcaccatttcaagaagacggcgaatagtagagcga  
gcgctagtgagcagcaggagtagtaacagccaagcaccacggccatagccttaccacagcccttagcattgcagttccagatgcctacaattg  
cgttagctactttttagcatttgtaaaattggtaaaatccaagccagctcactccatcgagcaaaaaggcaaatgtaataaccattac  
aactttacataaccagcagcagaacgtctcacgggttacgaccgcagaagggcattgataacgagcatgttgtgaacctcaatcttgcggacg  
tcacgacgcaaagaggcaccataacgaacgccatattaccggtcacaccaaccttttagttctctcgtcatcttggatgggggttttgcgttgg  
atgagttttcaaaagcttacccttggaaatgcaaaactgactgtttttcaacttcaaaaattccctttaggtgacaaatgttaccattgcaa  
gcaacgaatagaaagctgtaagtgtttctgtttatttgaatataagatcagttttataagtgaaagcaatgaaagtagcggcttgatattctt  
tattttgggctagaatgcattttgaacataattgctaaggatagttcatgatgctactacaacaggaaggagcgagatagatttagggaatgt  
tttgaatacatttttagactaatgagaaaaatcaaaagaacgaataactatactgtgcttttgaagagccatacgaacaaaagagaaggag  
ttgatggatagcaatatcaactataaaaagaaggagaacatgtaaagattgcttctatgcaaaggaatcattgcatcttataaacaagcaatga  
ctggaaccagaaggaacagaaaatttagcggcgacgagcaacctttgttggaaacgtctgtgcaatcacttagcaaaactttatagaatac  
caacagtaataaaaaataaatgtaaatgtatgggaaaaatgaacgaacatagacagcgttttagatacaggtttttcttttttttcttatt  
tttttaaaaagaaaagacgacaatttttaggataaatattacaggttcacgtttagattaatattcctcttccatgtaatacagcctccatagagtc  
ctgaccaacttctcataatcacgttccaagcagcaaggtcttcacgtgcctcgaaaattcaccttctccataccttaccgacgtaccagtga  
acgaaagcacgcttgctatacataaggtcaaatgtgatccaagcgcgaccaggcctcggctatagacgtggtattgaaagcatgcatacagc  
tctatcaaccttagcaatgctacttcttcaatattgttggaggggcggtcgcaaaataccgatcttgaagccagtaggacaccagtcgacaaattg

aatggtgcgcttagctttgatgcttgacagcagactgaacatcacgaggatcacatcaccacgataaagcaacaagtagccatataacga  
ccggcacgggatcacacttaaccatttgggtgtaaggttcaaagcattgattgggtatttcttgacagagtgagattcgtggtagccttggccg  
cgctcacgataggagcataggtgacaagtgggaaatggatacggggataagggaccaagtgggttgaattcagccaagtcgacgttaagct  
gccttcaaacgaagagatgctgtgatggaagatacaacttgagcaatcaagcgggtcaggttctcataagaaggacgttcaatgctgaggttc  
tacggcaaatatcatagcaagactcgttgtcaacatgaaagtgcagctgccaatcgagggtagcatgagttgtcaagacagaattgtaaggt  
tccacaacggatgtactcacttgaggagccgggtacactgaaaactgaagcttagatTTTTtagtgattccatagccaaacgctcaagcagaag  
ggctccaaaaccagaaccgattaccacccccaaaagagtgaaaaaagaggaaaccctggagaccagagcagttgtcagcaatacgcaggtatt  
tatcgtaacatcatcgacgagctcctccgacagtgaatgaccacgggcatagttattggaagcatctccttaccagtgattaattgttcggg  
atggaaaagggtccggtaagggtccagtgctacttcatcaatcacgttgggtccaagtctacgtaaagtcttctaggaatgatttcttgcctg  
tttctgcgaaaagggtgaaaatcattctctcggacttgcggcaacttcagggctcataaaccatttgggtgattccatgttcaaacagtaa  
agctcccagcaagaattaccgatttgagctcctgctgaccaacgtgaatggaatgatctctctcattctgctgcttttgggtattctaacagg  
atgctaaaatatttggttatgtaggttctgctgcatagacccaacaatctcgaatagagacgtttacgatagcacggtatagtgctgaac  
gaactcgaaggaataccataataaacagaaggagaaggccgtaaaatgatggataatataatgataaagcaattgaaaagcttatatgaaac  
gtagaatttgggattggagctgaaacaatacaatccgggaactttagccttttactccgaaacacaaactcaaaccgtcatgtttactattgga  
gaggaatgaggtcattgaagcgaactggttctttacaagggtcaacggacaacactgaaatgtatttcttcaaagctgatgtttgttact  
aagcaacggggttaaagcacgtaaaatgcagcaccgctaaaagttaatacgggtataataacagcgccatcactaaagtacggattatggggc  
aacgaaaaagtcggtgtcgttaagtttaacaatttgcattcttagggagagaaagtaaaactggagcgtaaaagctgattcacagaattgg  
cgttttgcctgtgttttaataatcttagcctctttccaatttggaaagcgtgtttgttgggtattactcttattaagggtgatttggccttgac  
ttttgaaaacagtttcttctttagtcattcatttataaaaaacggaaacaagcgttttgtttatcagtgttttcttataaagatgagtac  
cattataagcttaaaaccaaggcgtctcgtgctggagacgaagaaggaagatgccatgcacctgctgttacagccgaaagcactctgaa  
ggccttgttctattaagcagaaagtttggtagcttctctcgtggtgtcacctatcgtcaacgccatttctcacagatctaatacatgatgcca  
cattctaagaaagatagcaagtcgagtcgaaagaccgtcttacgagctaaatgaacttgcctctataactgtaacaatatttactttttg  
agctcgtcgtcgcaagatcttatttgcacattgcagctgctcctaaccgacctaccgttaaatccacattgaaaacttgcatactatggacga  
actcaacatgacaggaatgcttgaagggtcccgtcccattctcttttgacaaaacgtttgactcggctcctcatttgaagatagcacaagag  
cttttgaacaaactctggatataccgaagggtcctcgtcgtagcaaacctttattgaccgaattgtacactcactattgctgacaacaagatctg  
gttagaaactacgaaatccgacaaatgaggacctgaaaaagatcctgtcacctatttgaatggacctgtttgcagatgacctatca  
cattctcgaaggatcatttggcgtcccgttatttcaaaaatgacacttttgcagtgcaacatgggtcgtcggctcttcgcaacaatctgctc  
aacgctatgtcaatcgtcaagaaaacaaacttgaacatgctgttctgttgaagcaaatgaattaccagaagatccttggaggacgtgttgc  
aattcaaatcaatgacctcacattgttgtttcaagatacaggttggattatggttattataagataagtgcaatagtcaggtaaaaaaa  
aaatacatgggtttataggttggcataattgataatattgaaagactatattataaaaaaagaagaaatgctgtaaagctagtagctcg  
attattcataagggtgaggagagataggcaaaaaatgaaatgtagtaaaacaaaaactgagcaggttattcaaaagcaccgctcccaacg  
gatccagtctaaaactgcccacttcaataaacctgaattgtcttgaagactttgagatggaaggcaagatagaattcatcctcgcagtc  
tgggtcttgagcacaatttcttgaagcaagtcggctatttctgaacaatcacttgattcttttgaatgagtatcatggaagcaattcgtccga  
gttgtgtagaagaagaagatgtttagctccatgggcatagatgccgatacatgaattggattgtaaggcgttgaagcaagtagctgttaatgt  
tcaccttaccaggttaaagacgctgttttaccataatcacttagattccattgctgctatccggagcagcagacctggagggaacgca  
tgtcttctttaaacatattccttgaagtgactcatttaaaaagatgcgacttcttcgagggaacgtgatgaagaagacaagatgcaatagt  
tcgagagaattcttggaaagatgctgtttagctcacgaaatcagattcacaattacctcgaccataatcgcttcttctatcagctgaaacacatt  
gagatatccatcctttagcaacacgatcttctgtttctctgcaattttccaccgcttggtaattttttgagagaatttcttctgcttttcaa  
ggtccaactcctgcttctcgcagcctgttttataatctctatagaagcactgtttcaattctaagctgctttatctactcatctcccgtcatc  
ttgctgaatccttgcagacgataccaacgagaaaaggccttgaattgcctaagacgagggtcatgaagttcagctgtaacatttcaatagt  
atctatatatacaaaaaaagatgcaaaagagatccttgaacaggttctcacgatagggtataggaaagaatgtacaggtgaaaagaa  
agaggatcatgataagaatgcttttctaagagttcttttgaacagcataatatttcttactcaataatattacattagctacaaatcat  
taggaaaaactcttattttagctgtgacttctgactataatttgcataaacaggaatcaggagattttagaagccagaagcttgcatttt  
aaggaaaaagaatatttgaatgacttttagctgttcttaacactcctgctggcggtaacgactgaagctttagctggttaattctactccat  
tttagtctaagaagaaaaaaacaagtttaggttcaagaagatacagaaaaggattttaggataattgttttgggtgcaaaaggctaaa  
caatccaatggaattttctaccaagagcaacatgctaagagcagccctatcatacaagaaaatagccctgtttctgtaagtccatctgaaa  
atgttcgtttataacattgaagccaaataagtaagtagtagccgagaaacgtgtactcctgcaacttttcatggttttccactgggcgcttgggt  
tagcttgaagccagaatgatttcttctgcttgcataaaacaaagttacacaatcactagtaacaattagcttggtaaatttggatccttctac

gaatgatttatatggaaagacctacgatgaaacatttgaatttacgagcctaagaaaatccgctgctgaaaaccgtgaagtcaactctag  
aagaagagaaaaaaacaaatcaagaattaatagattgccgtggcaatcagctcatgagcaagaagaattgataagctacgaaaacaaatc  
aaagaaggaggcttcgcggaagaagcaattcgtaattaacctcaaaaagcttaactttgatcagaaaactcaatgctcaagctaaat  
atgtcaatcgaagggagaaaagctcaacagtttcgagcattgagaccttgcttgaaccgtgacggagatgctgctgctatgacctt  
ataaaattatggagctaacagctgactgtccacttacatgatgacattgggcaatgctcaaccggaggcagatacctttagtcgacgaaacg  
ggatgctcttttgggtccttactggaacgtctaggtggagattctaaagttactttatcatcctaagcagcagcccaacagctccttggga  
actttggggaaaggaatacacagaagaaagtctcgttgaaaaagggatactcggaccttgaattggctacaagttgtggccctgatgaggct  
ttaaaggatatgtatatggatgattgtccgaggaacagctcagcgaatgaagcttcgcatagaaagagatatgagggctgaaaagcttcta  
tgcccgattacaatctactctagaggatttgaaaaaggaaactttgatgcatattttgtaagcaatcatacacaatgtcagatataaatctgc  
tactgccaaggtaggatcctctgaccttcttctttatctccataccaacaagttactgatcgateccatcagagttgttaaatggctcacc  
cgtttgaaatgacagaaattaagaatgaagaaacaacaaagatgaatctgctgaagaacaagagttgcaattgcacaggatgcatggattg  
aaaaacttatcatgttggatcatgaaatccgtactcgtcttccaagtcttccagaacgtactcatcattcatgagttcagggagacat  
gggatattttgtctggcctcaagttcttccgtaggcactgtcgtcgcaggcaggttctaaacggcaaaaagcaggttctgtaacaaa  
aaaaagtaaaaaacagaaaatatttggaaattagtttggatagaaaagtggggtattttggaaataggtcatgatgatcttggttatttt  
gttagtctccatataatcttggactggatgtagaataataattagataaaaagaaccttgaatgtcttgcataactagatgactt  
aataacctagctattgaaatggatctttaaagctgtagtagtattctcagtgaccatagaactaatgaacaaaagcacaatccaatcaaa  
tttgttctcaattgttggaaaaatatgaacatacaaatccttaaatagacacctcataagctttcacaaaatgttatcagaacatacat  
aagatggctgaaaatccttaaatgggtatcatttgaagtagtttattcttattgaaacacttatagaaacaaaaaaagttttttttttttttcat  
ctcaactctacatgaaatgggtgttcaattcttccaccgaggactgtcttgcacttcaaaaagttacacctctcaaccacaacggtagtttctg  
gtgaaacctttctcaatgacagaatttattgttctcgtattagtctgattagtaaatcagacattcggtaagataaaatcagtggttttttactaa  
tcgttagatgtgggtatctgcaagatattaactccaagactctaccctagctttaaagcatggtagcatttccagttaccattcatttaataac  
aattagttcagtggtcgggtacggaaggtagaaaacaggatccatccaagaatccgctgcccgaatgtgttactacatcgtcttctcgtg  
gaagcgacttaagattacgtatagaggaccagctactactccagcactcctcctgttcaacctccaatgatcctgctattgtcggggtag  
tttttttttttttactgagggtcggggaaattgttctgacattactgaacgtttctctagcgtcctaagaactctacctaagagttcctt  
gaatatctattataacatagtttagtcaaataagtggtcagtttgggtggaaccaactgggtgctcccaaatcctcagttcaatgacgcta  
acccttactacaacatgatggaccaagacgggtgctccataatacctatagcaggtgctgctccctactacatgatgcaatacaggggga  
gctccctatgctcctcaggtgctgctccttggggactccaatggagacttctaccctgctgtaccctattataatgctcctgtagatcagcaaca  
agtttccaacgtccagatagctcaccaggtgtcaccagccccttctggacaatctcattcatgtccagaccaggggttcgacatcccagat  
ggcaaaaacctatgactccaaactccccaatgctaattgtgacattgcttctccttctgttactccttagcactagcgggtgctacaacat  
tgctcctcagctcaagtaacaatgaaggtgacagatcggttaaatcagtttctgtaaacagcgaacgtgttggtagccacaactgtccccgagc  
ttctcaagttggaggcgctgttcaacttctcattcattgactgctcctgtcagtgctcctaaaaacgaaaaaggcgaatttacttccaatctgcta  
atgaaaaattccaagtcttaagaatgaacttaacaacgaagaagaccaaattcatcaggactttacaaccaatcagtttcttctgacgata  
ttagctgtgaaagcaagagaaaaatagaaagcctttagcctgctctttacgcgacctgaaacgtccttgaatttggaaaccttggagttg  
cttctagtggtggcaggacgccgtggctggtcgcggctcgcggcctggcctggtcgtggaggatactcaagaggttattattatc  
aaagaacaacggggtacataatgctcctaagcccaacaataaatttgggataggataaccagttcagccaattgaatgttcgaaattc  
acctatcgtcttcttctgcatctttagacatgaaaaaatgtttctgtcatagaaatgaaatgtctatggacgtaaaaaatatttggaga  
taacgaatagagaaagtcaattgtaagtaccatcaagtcttttttattcgaatgagcaacgaaaaggtattttcaacgaatataattaagc  
gtaaatgaagtttatttgaatctgttttagaaggtttacgaaggaatcaaaaactagttacagaacgcgaggttactaaaccaatgggttc  
ctactttgccaacattcctcatagaaaggttaaatcatattttgtaatctatttttaaaagaaaaagcagtgaaaattgttactttattg  
aacgctttttctgtatccagcaacgataacaacgacaagaaactgcgatgtttacttaaaataccggtatattattgattgaaacattaatcctt  
ctttacctaactaaagtattgactaaagattcgtaaaagcaagatgaaatagaaaggttaagagaacatggattaaaaatagaaaggtccag  
cgaaagaggcaagcgcagaagtgcacaataaaacacttcggaacaaactttcatgctcatttattaagcaatttccgaaaagtctccgttgcg  
tctgtagacctcaaaacttctggttataactaagcagtgctattggtattcttcatgaacattagaatgaaataacaatgagcgcactac  
atgtccagatataatgtatagtttgaagacaagacactacgccgttctccaataggccaaacatccttggactaccgtacttccgatgcaa  
taaaagggaaggtcgtttgcaagctatacatatattaaatgaacaagtccaatgtctcaggtgctaataaaataagaggaaccacttga  
gcagaatataaccaatggcaccagcgtcatgctaggagccagaatgccggccttgaaaaaggttagaccaatttaaatcattttcaatta  
caagatatggggaaggaagattaaacttggtaactgttttaactgacgattcaagtacgtttcctcagtgaaactcagtatagagttgtt  
ctttctcggtagaagtaagaagcgaatttctcagctgtttccatctcatatcggcgaacttagggatactgcaacaagaattgtaattcata

accatatgacatcgtatagttgaagccgaaagcatgctttttgacaccattccctgtttgtttacatgattacaaaccgtaacgcacgatggagc  
agtatgtaattatgtatatactgtgatggaacacaaagcgctatagctactataacagactatgcggaagtatthaatcctctgtataagttcgc  
aaagaaaagtttgattcaggggtcgagaacatgctgggaacgtttacctctccaaatccatcttttctaacgaactcagcaattgtcatgtcgaa  
aagaactgcggaagatacgaacatagaagccaaaaatggctcctggaagacgcgaggtgtctcggattccatggatacagaatgggtaa  
ctttgaggacgcgtacgaagacgaattgaaagtgaggatgagtacttagaagctgatggaaacgaagacaatgaaatggaagcagctgaagg  
tgaggaagatgctgcagctgcaaagtctgcctggttacctgggtgtcataaacgaaggcgaacaattggctgtagaccctagtcttatgat  
gcttcacaacatgcaagtgaatggccgttttgagttggacatcctccatgattcgttgggaagagcgtcagcttggcctcaagagatgac  
ttggctggaggctcgaagcactcaacaacgaaaacgaagtactgttatgaaagtcagtcagcttgcaaaaccaagaatgatgccgaagacg  
aagaggactctgataactcggatgttgaaagaagatcctattttggagcatcggtctattcccaccaaggcgcttgcaaccgattcagcttctc  
ctgtttcatctagggatctcaaaagaaaaactttatggcttcttccaagaacaggcaaaagtcataattgggatatcgctcctcatctccaatc  
gctcgtcagccctggcaatgtggttcccgaatcaaaacaacctgtttactgtgaatcaacacaagacagaagggtatgcttttagactggtc  
accttcgaatattccttactttcaggagacaacgccaatgaaatatttactcgtctacaaatagtgatggcagacagaatcatctcccttt  
tggatcacactgcaagtgtggaagacatccaatggcccctaatgaaaagactgtgtttccagctgtagttgtgatggactttccgtattggga  
tgtccgaaatcaaaagaagaattctgccttaactgttaatgccaccctggcgttgacgttaatgtttgagttggaactcgcgtgtccttactga  
tggccactggctgacaatgggtgtctcaatgtatgggatctccgctcttgaatcttcatcagctgtcggcacgctgtcgcacttttaaatgg  
catcaggcagctgtcactagatcgagtggtatccaaaagaagaatctgtaattgctgttgcgtgctgatgaccagcttctcgtctgggatcttt  
ctgttgaattggatcctgaagaacaagctagccgtgctgctgaaggcctcaagatgtgcctcctcaactatgtttgcatatgggacaatcagc  
cattaaagagcttcatggcacaacagattcctggaccattgtttctactgctcaaacgggtctgaacgtctcaagacgattacttttaaaact  
tcatggaaatgagtaaagcaagatatttgaatattataatctacgtctgtttcgataccatgatgggagatgttgatactgtgcattttatcc  
ttatctttctctatcgtgcaaattttgggttttggcttattatggttggacattcaataaaatggatttccagtaacacggttctcttaatg  
gttttagttttggataataataaaaaaaagagaaagtggacagcttctatggaaagagtaaaatgcagtgataacgctgcaaaacctg  
aaccttttagttatctatagaataataaaaaaggcttctgagtttgattttcttctggcactgttatttccaacgatagatcattttggc  
cgaatggcaatagctggcagattgttatataagaagtctgatttgcagcttctatattctgtaactaaaggtaacaatgctttctgaagatggc  
ttttatggaagtcatgtataataagatattaagaaaagtaacttggatttgtgatatacgtcagcaagtttctgttctgactcaatgatcgcac  
ctgcattgggtctttgatgaaggcttaaaaaagagaaaagatgcattgtctaatggggctctattgaggatcctttgcttctgttctgtttgagt  
ttaatgaactcatttcttctgacttctcctctctcattgttttactatatttactctggttctgtatgcaaatatacaaatgaaaactaa  
cagtaaaatttcaatataagcgaagctggttgcactacacaacaaagcttaccgcatatcaattacaatgctattgtacatacagatcga  
attgaatcagtaaaattttaagacatttctgtcagcttgcgcaatttggatttctactctcgaagattcctgagcttctgactcctccactatgg  
gctgcagataaaagcctgagctagcaactgaacaacagcaaaacgaagaagctgggacgtattgtttcaaaaagaatttggagggatttcttt  
tgtttgaaattgtttacgttggaaaatgctgcaacatctgtaaacctcaaatggtaagtttgacgcgtcagcagtagaatggccttgcgttc  
attaaatgttctcaacaatggaagattgagctaaagttgagtcctaatcggtgtatattggttgtcctttacgtgttttctcgtcaatgg  
ctgtttgccttcaaatcgattttctgggaaaagtcaattggggttactagccattaacgtgtaagagttgctgaaacgccattagggacttgg  
cttttctctgtttctttagctttagtttggtaagtggctgctaacaacgggttgaataggcattggactagcaaggattccgggtatgga  
ctagggattaccttgatacggagcttgcagattgctggtgaggggtgataagaaggcctatttagcagagcttagttgtgaaggatgat  
gtggatgttccatgcgtaaacgtaagatcattaccattatgacttgaagatccagatggaattcaacgggtgaagcaatggtactgaagctca  
ggttccatcacttgcctgaggttcttatgatttagtcttccgattatgttttgatggacttgtatgaagccaacaaagagaaagacgctgt  
aaaacagtttcccgcgagaagttgctccctaaggtctgagtttttggtagtctctcgaagtttggtaaacctatggttaacgacgttact  
tgtcgaccgaagaacacaacggtaatgctgctcgggactccctagccatagtagccttactggtcaacagaaaatggcaaaacgtctaccaa  
cacacttcaagctgcttcttccctctcgtccagttctggttctgatggttctatgcttctgctgtcgtcaatactccaacatctctgaaaactta  
gtttgatgctcccgtgatgagctttatgccacttttttagatcctgctcgtgctgctgcttggctcgtgctcctcctcagctcgatgttctccca  
aggctccctttcctctttcacggcaacgtcgtagccgttcttattttggaagaaaacaagcgcacgtacaaaacttggcgtctgagcctgg  
cccactggcactatgctgaaatctttgagtttgaccaagctgatacttataccacattacgcatggttatgaaggagtgccatcggagagg  
aggagattgttcaaaacaatattcaggattattacatccgtccataaaaaacttttggtttccggtgctgtcctttaaagggtttggatcggag  
ttgatgttctgactttatcagcgtgaaaaagatcaaatgttggcgtaaaatcttttactgtcctttcatatagaatttcagtgatcag  
tcttctgaaactaaacgacggtttacaatagctcaaaaggttaaaagccatttgtgatgataatttggagtaatgcttgaaggattcaatcct  
ttctcctctttggaatgatatttactgtttccgttaagaataacacaatcaataagattttaaagagaaagacgatagaaactacatcttatt  
aatcttaactatatttagtatagaaaactggccatgaatgtagaaaagtatagagaacaaaacggtaacttgatcatattgagttccctttac  
tagatggtgtcactgctttggattgtaagcgtataaactaacgtaacatacaaaaaaggatattgctgaatgacctgataattggagcaaaaaa

gcagccagctttcagcttatgcaaacttggatgaaagtaagtatcacgttcacgggcagctctgtcatattcatatgtgtactcgtttgttcagac  
tcagactgctgggattccagagcgttactccgtagatcgactagctggacgagcaatcgaggctgatattccttaattttgatctgtaca  
caattaggaggaaggtgccaacagtattaccacttagaactatcccgataacattgcccggagtggaagtggtgctgtaaacatactcca  
gcatacacaggaacaaggtatttgaacaagagaacaaaatgaggatgaccagccgacgtaagatactggggaatagtagcaaaagaagac  
agtggtaaatgagtaggcaaaaaactaaggcgaattagccagataagaggtagcttctcttcaaggatcttgacaatgtccataatgct  
cttgatgtcagcttcggaattcctgagcttcttcttaaaaagtagcgatctctagaaaggcaattgattctccaagaaagataccgcagacaa  
cgggtgcaaatccgacgttaaggccccatacagctcctacaacaatagatataggatcctgccagctaatggaggaactgaagacgcagcaat  
catgcatagcgggatcagaaatgagaatcgggtgatgagagaggtttctagcaatgggtaagataatgcagaatttctttatggtagacactta  
ataatactaggagcgttataagaaaaatgagagagcgaatagcccaatctaaaagttagaacaatgctttatgttaggttatgaataaaactt  
acaacttaggcattgctctagactgaaacatttttaataataatctcattaaaataattgaaattcttataacatatagcttctgttag  
gcaaattcacattctagctcgttatataggaattattgggatcggcagatggtgatataatgagaacttcacagtgaacaacaacattaggttcaa  
aattcgattctattgaatttgcaagtacagttatacattgactatgtacgggcttcaagaacgcttgaactaagccatgtgcttggaggata  
cggatgaattgagattacaagtagcaaaaaataattgccgctgtaagttctattccttatataatctaaatttctttctcatgctattttcc  
attaaaatggttccatcgccgcaatataactagatatcgaatttaaaaaagctgtgtcattatctttctctcatctcaattgctcatt  
tttatcgacaaaacatgaaaaccattacaacataagctcaaaaaatgctcaagaagcgcatatcaagcataagtctcacatactgctgtag  
agtacagccaacaaagtttgtagcttctcttgcgttcaaattctttcattttctcagtggagacatagcgtatctcgcaaaagcctccatcg  
tctagataaaatagtacaaaagacttggtaactatattccacaaaactgttttagaatggacaactgagctaacaataaatgatggggaagt  
tagaaaggctccagcttgtagcagcatcatgatcaaaaagcttgtaactgtcctcaaacgctcgtttctcatcgccggtcctatagcaatcggca  
cgtcgtatcatgttggcaaacatgggagaaggttcttcgggaatccatctgtcaaggttcaagcaaaaaactaacaggaaaagcaggctttg  
cgttttagagacctgctttccatattctgcaactatcgatagagaactccggcacatatcgagattatctccttttactagcatgagcgtctg  
gatcaacgctaggctgaattaaatcagctttatagagaagtggcaacgttggaacttgtaagacgtgacttcaatctcaccggttgaattcc  
cactgatgacagaagtgacaaaactggatccaaaagaccgggttgtgaccatttgtttgggtcggaaactcgttgggaagtatgaagattgt  
aaacctcaagagaagaagaaagtaagaatctgcatgacgcttacaaggaactttccggtagcactaccgtcatcagtaaatcagtaaaat  
aataccgaccgcagagctcgcaagccgacgacttgatcaaccaaagtttcttctggccattcctgtaaagtaacccatccgcttcggaat  
ctggggaggctcatagatagctctacgacagcttctcccaagggaacagttgtgtaaggttcataatgccataggtataaccaattcttga  
aagccagttctcgaagcgttcaagaagaatcgacgatagcgggagaggcgaattctacatgatctacaattcgaagggttgaggttcat  
cattatggtagaaggtggcattttgagcagatacccaaaggccaggaggatgtccggaagggcactttctttgacttgaagtaaggttctc  
cagcgggtgaatgaaggattgtgactggcatatttataatattggagtttatcttttcaataagaatgaaaagacatggtcctaattgattttt  
ctcgttgataactctcatcagcttctagaggagagaataatcgacatgctttcgggtcctatgtcgacaaaacggtgtcgtaggtcgaggga  
tcaaacatctgcatctcaagagcatcatcaatattatctgagccatgagtagtagcaacggtgctggagtttgtagccgataaagcgttggc  
ttggaaactcgacttcgaaacccttcttaccaggaggaacaggagttgatgcaggaagctcttaggagacccaaggcgtaaaaaaac  
atgcttccatgctcaatcccgtttctgcagggtttctgcgtctagttgagaacaaggcgtaccatgtctgactcatcctgacagtgaaacgct  
ttcagcgggtgattgattttcaaacattaaacaaaacctatatacgcgttaaaacgcttagttcatcctcatggcaatgcttctgcatatcacg  
tacgctgtcctttaacgtttgcaatgtgtctgttaggttgaatccgcacgggacattcccagcctacttcaaatcgataatctatattctgttagt  
ataaatcttcgagacactgtctcctcataccattttctgttaggatacgtgaaaacggtgaagtaacaattgctattacagcctgtgtaacgtg  
gtctaataccgaagtgcgagcgtcgttaaggactataaagtgtaataatgtagtcattgcaaggacgaactgtttgtttttggttggga  
aagaaagagaccacgaaaaataataaaccagggataaggaaaaggagaagaagtaaaaaatggacgattgaagtttctggttagctt  
agttttcgacaaaagattcatattagacttttaatatgatataatgatacttgggtatgatttgaagtctataaccagggtcctttaaactgtt  
tgattatgaagaagagtagtctttacttttcttctttttttttttatgtatgtaggttgccttcttactttgcgtgtagttcaaataaatt  
tagtgatataatcattgtcgtgatgacttctttaggtaccttttagtgatatacacaaggcttctgaagagcaaatgcttaagaa  
agctgtacatagaaaaagaaaggggtgccttgccttgaatagtaagagccgaataaagggttaggagttgttttaaaattttttagtattcatt  
tattattattattattattattattatttttttttttttttttttttttttttttttttttttttttttttttttttttttttttttttttttt  
aatgaattctttatgctctacgttgccgaagcttaccgaaactccttaaggaaactgaaacagtaaaataaaaaaacctttactgatcattacaca  
tacacgagctttgatatttatgtaaacaggcggatcaattattaagcttactttataccacaggttttacttagtaggtataaatttataag  
ataagtaacaaatagaatgacttagcttgcatttatgggaacttacttagcaaaaaaaaacaaacgactgtaagacgcggttttgcg  
atatacagacttcaactcaatttttaagcagaagctatcgataaactataataaagtcttttaaggtgcaactcaattaaataaaga  
ttacatctgtccttgagtgcaaacagaaaaaaagaaaaaaagaaatgacttttttaactgcatagaataaactagagagctgct  
ttgatgcttaacaaaatgaaaagtatcaactttacaagttctgctattaagtaacaagctttgttatcgggtctcaaatcatgatttttctt



gactgtttatattcttgaccttttagttcatttgtctacggccatacctagggcaaaacaccagttcccgtccgatcactgcagttaagcgtctgag  
ggcctcgttagtactatggttggagacaacatgggaatccgggggtgctgtaggctttctctcctactggtttctttttttgcctttataaatctt  
aagcttaataaactagatagttaatttatccccattcattaggattgagcttcatactgtgccactgaacatagactcaatcaacaagtcaata  
gcaagcaatatcaacagtttattgataaaaaataaaataaggctgaactgatagagacgatgataatagcaataaaagaactaatataaaaaa  
aaagaaaacaaaactataacacgcaataagaataaatgtcgaggaacgaaaatataattggagtgcataattataagaaaaatattactaa  
cccaccagtcaacaccaataaagcacagtactagcgagaagtacactataaattataggccccagcccagttcaaggtggaggcatactgctt  
ctttttaccagcaatcctaagaattgagtataggtaggtatacatacaatctcaaaacagtagattcctgttatttttattatttctaaagtatt  
tcattttattttgttatataatatttggatatacaaaaacgatactttcaaaaaggtaagtagctgtgctaaaacagccacagtttagctga  
accaaagagatgtcataaagcatccacgatcatcctcaatgtaatttttaaatccattgccctcaggaacctcacaacttagaaacgacatcac  
gcttctcatgacatgacaataactactactaccggttgcgctttatgaagcaatattgagtcattttggtaattcaggcttcatatatgaagaaaa  
tacagagaattgggatatttataaaataggttaactaccaattgattcaaatgaacctcattcataaactgaatgccgtaaaagtcacacaaaac  
gcaatgtttccgtaaaatttttcttacttaagaaaaattgctgcttttaataacttagaataaaaagtgtctttcaaccaatctattgttga  
gagcttgttgcgttccgctatggtcgcagcgcggcgagcctcagtaagacgtttatgccaagcataggcttgggaaactcctttcgaaatc  
caattgtggaagatcttcttgaattcatgccttcttttcaaaaagcgaaggtagcatactgttccagttataaaaagccacgtcgcgattgtgt  
actgtcagcgaccagatagcttttggagaattctttcaaaaacccagcagcacgcttgtttctgttctgtatctaataacggccgacgca  
acaggttctggatgaaataagttaaaccagcctgctgtcccaaatgacacctgacctgaagattgaaaaaaaaggtagcagcagatgat  
ggtactctggatgatcatgaggtaaagaaatctttcttctgtcgtacctgtctccaagtagccaataatagcatcggactcccagattgcata  
atcattgtttgatgatcaattaatgtaggaactctaccattgggattgtaaaaaagggtgttctgttcttttctcattttttcaaaatcaaagaa  
gacgggttcgtaagaaagatttaattcttttaagcgataactcttccaaggattggacctctttatgagagaagagagtaaatgagccatt  
tctcaagaatgttgaagtgatattatgagttggctgctttatcagttttttatcgacacacttttacgtaattagcgttatttgatgactaaa  
aactgaggtttgttacgatcatalcagatactgcttataaagcaaaaatacaatcttcaaaaataattgtttgtagcgaattgttctccgaaag  
ccttgcaaaacaagaccaaggacgagaaaacttacaatttttattcaagaatcatttgcctacttctgttattcactgtattgcatggtagaaa  
acagttggaatacagattcagcttcaggaatgatacgaagtaacaataactcgttaataggatataatgaaagaaaaaggtagcttgcaggtg  
gattgtgtgttttctcagtttaaccataacggagagaaaaagaagtatacatgtttgatgataaacaacattccatttctggatattggcg  
atgtttccgaccaactgggctcctcaagaatgaaaaactaaacatacaggaggatccagaagaaaagacagcacaatggttaaccgct  
cgtttgctgtagatattccaatggctatccagcttttctgtttaaagttgcaagtactagcgttaggttctccagggttaaagaaaaagtttctg  
tattagttatattgctcattgattagttataatggcgactccattgccatgttggattgaaatgaaatcagtttgaatgaaacatgtcttccagaaa  
aagctcacttgctattctttcaacagtcacacctgtttaaagcctcaaaaacctgattacaatggtagaatatttgacgatgaaattctgaacag  
aatgaatctcattacccacaacaacatcgtttaaagtaactaaatcgtttatttatgttaacgtttgaataacgaatatgaaacagcaactcttct  
aaaattgttttctcataagcaattaagctgtcgtcaatagatgacgatttgaatttcaaaaactggaaagtaattcaattgaaacctctgtta  
atcttttcttctgattttattcttccattgatgaaattgctttgagattgaaattctatgaaagaatcaatcctcaggttaactgatcaattgaaactg  
tacttctacagtgctgactcaagaattttactgagcaattgaaaggtataccatatttgaaggtttttatataataataaatttctgtaac  
aattgaaaagggtgtttcccttgaaagacaaaacggcctgaggttttaacatagagaataaggcttgaggtatcaccggttgcgcttggtatgt  
aagcaatgctgaaatgcaccattgaaaatgatcaaatcagactttacgaaatggagaaaacatttgcgtatgaaagtcgaactcagagcgac  
ttgtcagtttgcaggagaaaagaattcttctcgcagcaaggtacagtgattttgagatgcttcacaacatcctgagcagagactatagtgat  
gcaatccctctgtccaagaaagcatacagtcacttctgttttctggtggatctctttaccaatattcatcgccaggcgaatgactcttcaaaaac  
attcctggatcgttgcattgccatccggtaattagtagtctcatgcacatgatcaatttctgaaaacgaatcctggaattctattaccataatg  
cgtggatgcaagccgggaatgccaacatcaaacctccacaaggagtgaagaaagtaagaaatctgaaaagccttttatccttactgatccat  
ccaattgacgttcaagagaatgcgaagcggatattagaaaactgtgagacagacctgcaaaaactggccaaggcctgcgctcatcatatgagta  
gtctacaggcgtttccatcagaaactacaatatccaagatatttatgcctttatttctgatgacattgcctcactttggaatcctaagaaaaat  
aatgttcaattgttgaatgctttcaagcaataactgacttcaattcaagattggaggattatctattaatttttaaatctttagtgaacaaaaga  
gagcaaaaagcaaaagacctttgaaacgggtccaattcgaatgctctcatcgtcctgtgatgcctacgtccgctcaaaaacagctaaccacga  
taatgcgaacgattcgaaacttctggcaaaagataacaattccttcgcaaaaataatctttagcttatttactatccccaaagtttctcgaaa  
aagaagtcaatatctaccgaaatcgaaaatcccgtagaggctcgaagctatgctatcaagatcttcagcagttgatgaaaaattggacggcg  
aaatgcaattccttctgtaaaaggttagatactgaaacccggcgactcaactgtttgcaaatcatgtgaattacttactgcatccttga  
aagtttaattcttagaaaatacttacgatggagataacttaattcgtttctagcctggtttgataggagaatttttttactctcatgtcatctca  
atggattctgtacaaaatgtcatttcttctgctcgtatgttcttcaattatctttctacaagcaaaatttactacctgtttttctgcttcagaat  
gaaaaataactctttattttataactataactaatgtctacaagctaaacctgaattcgaatgactagtttctccactttgttcttttgatgtcttta

ttactaatgataatgcatagatgttcaaatttctattctaagattacatatacttatgttgatgaatgaatatgttaaaaaacagtattataactag  
gatgcatcgtaatgttccaagcttacaagctaaaaactcactgtagaaaactcatagatgtttgtttatgtatttcttataaattagaaggtc  
actattgacgtactctgaagaaatcgatatctgtaaatcaggaaagcttccagagcaaacaagattcgctcattaatactgaattgga  
attttattgaaatctcactgaaattgggatcccacgttcaattttggccttagttcaacgatcgttgcaaagtcggtcatttttcttttaactt  
atatcgctttgaaaaactaaactcaacctaaatgcttttataagcaagtttggtttttagtggccatgacaatcgtttcttacaacagcttcgctt  
gacccaagggatgctggaagccccagacgatcatctgtgtccagtaatttcaaggagatttaggtgtctttggaatccaattattctttg  
caaatcatagcttctcctctggtatctacctagtcaatagttccatcaagaatcatcaagaacttttggtacctggaaggggagcgaagtctccag  
gtggatcaaaaccattcattcctttacgttaaggacaatagtgcttctggatccagatcgttgatttgacgttgatcatcgttccgaatctgttct  
atatgatcatgatgtccttattcagaattatcggttgtgaaagattcaaccgttaccgagtaaatcttctcttgatagttccggaagatatga  
gcctcaaccaacctaagtccacgtctatgatagcctgtttgtcaggcattgggaccactggaaaacaggtgaaagaacagctcttattctatt  
atccttgaacaccatttgaatcgctcacactttcaactaactacgcctacagctattgatctcttgaaggtagtggactcgaatgtccataga  
gcctttggcgactcaacggactttgatgctacattaatgaattggttttgttctaaagatccgaaatctaataccagcaaccaaaacaggact  
gtgtttattgttgaactgactacgatgaaactgaaaagcctcagtgctgctatgggtgctttagctctcctattttcggaagatggtccaaa  
attggctggttggaaatgagaacacctaataatgagagcgatcaaaaccaagttatgattactatccgaaaaacggaagaacagcatgttg  
ctcaggattgggaccgttccctgcttattcattgggtactttacctagcggcgaactggtttgatccatagctgatgacgaaggaagaag  
aaactgtttttattccaccgaaaaaatcaagtatttcttaaccaaagatgaaagtgtcttatcagtttctagttccgagggacctaattat  
ggctcagtaaatcatctttatttagtccaaagattttgttctgtatgaccgtctcaaaagaagaagaaccgtttagatgccaatcttggtta  
agcaaatcttctgatgaagaggtatggtatcctggaacgaatggtcacaatccacggatggattgtccggccagaaagttttagatgctacgaa  
gagatatccccttgaatctttattcacggaggacccccaggatcatggacagatagctggtcgacacgttggaaatcctgctgattcgaaattct  
gggtttatcgttttaccattgatccagtaggatcaactggctacggccagcagttaccgatgatattgcttgaactggggaggtcgtccatacca  
cgatattgtccgtggtgctgattatcactggcacaattcctatgtcgacggcagtaggatggtagccttaggtgcttctacgggggttcatg  
attaattggattcaaggccatccttaggaaaccgcttccgagcttttagtatctcacgatggagtctcaacacagtgaacaccttctatagcacag  
atgagctttatttctatgcatgattttgggtgactcctggtggagaatagagccatgaacgctggaatccttcaattttgtcgagaattgg  
gcaactcctcaacttgaatccatagttccaaggattatcgcttaacggaaagtgaaggaaattctacattaatgcaactcaatacaaaaagatt  
cctagtaagcttctggtttcgaggatgaaaatcactgggtccttaagccagagaactcttgcgctggcaccatgaagtcttaagctggattacc  
agcacgtaaatgataattgatactttcgatggattttctaattatataattatcaacgcccattgtctaaagcttctatttctgatttgtaa  
ataccgcggttccgagtaattccgtaactttagcatcaaagccagatcaacaaaattccttcttagcaaaaaacgtcgaataaagtaatta  
ccagtcaggattttactttaaattgaaaagaaacttaactccttgacatatttagctggatttttggcgacaatggttaaagtagaagttcgtgtacc  
tacttatacggcgtctgccgttagcttctgagcgtgatcgtattttggctcgtcctattcaagatactcagaatattccgtaaaattgttgagcctat  
cattgacgatgaaaagctcgtggtgaggcagccctgttgaatttctgccaagttgaaaaggcagaattaaagctgctattttgaaggctccc  
ttcaatgagatcaatgatgaaggtgaccaaggattcgagaagatatcgacatcgctataataacatcttgcctttcatttctgctcaattcgctcc  
caacatctcagttgaaaccatgcgcggtgttctgctccagaggatgtctcgtcctatagagcgtgttgattatacattcctgggtgacggctgtt  
tgccctcaactgccttgatgttgggagttccagcaaggttgcgtgttctcctatattgtcatctccacacctgctcgaaggatggtactgtggctc  
ctgaaattgtctatattgcccaaaaactgggtgctgaggaaattatattggctggtggtctcaagctgtagctgctatggcgtatggtctccgggt  
gtcccaaggtaaaacagatcttccggcctggaaccaattgtgaccgagccaagatgcacgttcaaatgattatggtgccttagtagctatt  
gaccttctgctggtccttccggaagtattggtcattgtagatgaatcttgaatgccgaaagcgttgccttgattgtttcacaagcagagcatgg  
tttgatagcaaatgttttaatcgcggtagcactactgatgagcaattgatgagattgaggcggcattaacctatgccttgcgtttgtctc  
gttcttctatatacaacgcaattaagaagtcggttatcattcgtactgatttactgatgaagcgtttgaatggtccaatctttatggcccagag  
cacttggttctcacttaaaaatgcttctcagctgcaaaaagttacaacgctggttagcgttttctgttgaccctggtctcctgtcagatggga  
gattacgcttctggcaaaaacacactttaccgacatacggatgctaacgcctattctggtgtaaacacagacagcttttgaagatattacta  
ctcaagaactcactgaggaaggtatccaacgtttgggtccttctgtgattgacttccgaattggaaggacttactgctcacgctgatcgattcg  
tgttcgtggtgtaaagctttaaagttaaataaaggtcagtaaatgattttgaatacatgggcaaggatagaggttcaaatgtttttgctggg  
aaatttgaaagattacaacaattgtcattagcagctttatattggttatataagttctctcacttacttaataatagatttcaaagggtga  
taagtgtattttctgcataacctcaatcaagtaatcgtgtatagcgtctgtatcatgctggaagtattaccaagaaccattccatacaaaaat  
ttatttctttgttctgcgacttttataccttaagataaaaacagaaactaataaaaacgttatcatacaaaaatgattactcagctcagcagcg  
caattatggtcacgaaaactggcgtatcaagcagaagacatgcaattgagcaaaaagaacaccaacagccgtattttaaatgtattgggagac  
atgaaagcactacaagaaactacaatcaaaacatgatcaaaaattcaattctgttactcaaatcaaatcaagtttcttctacagtaagac  
aagaataaaaattggtacgcgtcgaactaatcaaggcttatttttttagtgttcaaacattaaataaacttcaacttttctcagaagatcatg

gaagaacaacagaaaaacagtctgcacatggaaacatggaaaaagatatcgtcgatttaaaagctcaactcggaacatccaaagagagca  
agaaaatggtttaaaactttggagaagcatatgaaagagtcaatgacatgatgaaacaagtgacaacaaaagaacaaaaacgcaaaacta  
ctactcagttaaaacctgttcatacaaatcaaacatcagcagcgaaaagaaacgctacttcaatgaggaaacgggtactagctttggactttta  
gctgaagatgactactaaacaatgaccaccctttacgctacttcatcacaagataatcaagaaaaatgtcaatggcaaacgtgcataaagttat  
gtacctaaaacaattcttattttgtttttacctatacaaacatctgaataggttagcatcttaatttcttagttgtgaatattcaactttca  
catgagacacaaaactttggcataaagaacctcagactcttctattaaagcgatatcatcgaacaagtgtctcagacggcacttctatatt  
tgctcagggtttgtcatcactttttctaaagtacgaaggatctcagtgacaagttgtgtcgtgaaacatacctaaattacacagaacaaatct  
ttaactctagaagagctaacaagaatggtagatattttgtttcacaccgcagcgtttgctattataacatttgtgacggctttttcttttttttt  
accaaaccattatgacgagaggataccgataattagcttaccattaagcgcgtacagaaaatcaaccataatactgtgatgtacgggaat  
tagagaatgattacgctgaaacttgccaaaagcattgaaagatattcaagaatgaacgtagactgttcatctgcaggaagaacactgactgaa  
aagagcatttgagacatctttacatgaaaagggaggttatgaaatccaatgatttaccttcaatgaaaagagtataactagaatgttaataat  
ctcaatatttatcaaatccaaactttgtttttgtattacttgaactacgctatgatggcttaatggaaatctcggtttgctaatttaattcgtaaac  
gtttgacacctgtaacaaactctgaaatagccttctgttgacgagttcttcttcatcttccaaaaattacttttgggagttattgggattttt  
tcggttaggaacataagaaaaacccaaaaaagtggtttatataatctggaggtctttgtttacgctgaaactgagaatagtgtagaaactaag  
tgctgaaagttgaaaaatgtccattgtttctcagtagcctttgtccctcgcggattgtctgagaatttccaaaaactcgaattggatgaagctg  
aatacagagagaatcaataatattcaaagttgaagctggaagatgctcgtgctcaactgagaatccagagaacgaacaggaagagcgaagaa  
attcagctggtgcacaagatcagactgcctcctcaggtgcagaagtcacaaacggcagaggaaatggatgatgagctaaaagaatataagttgg  
acaactacgacgatgaagaagaggaagaagaagatgatagtttagccatgttttagcaatatcaaaggagtcaataccatgaaaatggagaaa  
atgacccttatgtgacaatgaatactcaggaagaagaagaatggaaactgaaagatgcaaatatatacctacagacaacctttgttgctgc  
acgtacagaggacaacttatctcagctcaggtatataattatgaatcgaagaagaaactgtatgtccaccacgatttcttcttccctctttc  
ctttgttttagaatggctcactacaaggtgggtacttctgatatactcctgaaactacgtggctgctggaacattcgatactgaaattgagat  
ttggaattggatgtggtggatgcagttaccctgctgctgtattaggtgcaaatgctgtaactcgggtccaacaaaaagaagaaaaggctcc  
caaagttaccccaaacacacggatgctatttctgcttttctcgaatcgtaacgctcacaatctcctggcttccggttcggcagatactagt  
atcaagctttggaattgtcatctgtacttgcgtcaagtccttacttatcacacggacaagtttcttcttatcctggcatcccaaatgcctct  
gtttgtcttctgtagctatgataagacagctagaattgctgatttgcgtgctgacgctcctccctaacgcttactattgacagtgatgtgaaat  
gtggcatgggacccccacaacgaaaataacttctctcgttctgacgctggtattttgtactattgcgatgtagagacatgtccaagccgttt  
ggcagctgcaagccatgacggcctatttctgtcagcgtcaacccaacgttccctctttgttctactggttcgacagaccgaatggtaa  
gttgtggaacacatctgatcatacccaagttatagctctcgtgatcttgacgttggctgtgatttactgtccttctgactctgatgaatctatt  
tctttcatttggctgcctcaggaagtaagggtcttctcgtgtttgggatacagcaacaaatctggagttagaagacattgagagctgattg  
gtaaaaaatccgttgcctcaaggaacgggtgttcaattggaagacgctggtgctaatgatgagtcgacgaggaggacgaggaggatgatga  
atatgaagatattgaagcgaacgaggatgatgattctgctgatgagattcaagatcaggaatggcttaattttcgcaacaaatcgataattg  
gaaattttctttcattataaattggatctataggtgtgtatcaaaagttggttagatgtatttaattatggaccctgcaatgaggtttgca  
tggtaaaactgggaattttggtagagtgaataaaagattgtaattattctttctttcatgaaactatgtatgaaatctcactgtacttttatg  
aaatggtcaaaagtcctataaattcagttgagctaaaaggctgttggtaattggttagaataacccaatcctattttaataattattttac  
tctttttctttaaagtagcgtttgcttaagttatgtttcttggccacaatcagaaacgcttctcactgtcaactctacactttcgtcagcaat  
aggatgtcatcaaatcttataatgacaacttattttctgagttatagaaaaattatgaatataccaagtaaagatgctagtgaatcgcta  
gcgaaacgagtttggcgattgcaaaggctcaatcagtgagaaggcttttagtaaggcattaaggactttgggcgctttccgaccaggatag  
cattgccattatgatacatgaaatcttaataacgaatggatgattttataggtcgaccagcggatactttgcttagcaacaatgctgaaacgaag  
gcaggtttggtgggtcccgtaaaacgagcgaatagttcagaacgaggagcaaatcctccctgctaggattagatgttttagcaagtgaaaaaag  
acatgaacaagctcagaaatctcaggtttacgagggggatcaccgcttctcatgtaggaactgttgaaatcatgatcgtgtggagttcaaga  
aaccaaaagttcccttaaagtcagaaaggcccctacgctcgaaggaatgataacaacgaatttgaacgaagaaggggattccagggata  
ggcaatatctcaacggaaagataataatggaggtagaaggaatactggagatgaaggatcagcgtttcgtaaatctcgtaatcttcttagggac  
tccggttattataatcgtgatattctactatactcaagatcaaggcatgatgattcagcaagaatcttatggttcaaggaaacgagggccg  
agcaaaaaatctgtctactgggaacaatgatggaacagctttgtatctcatagtagttgggatccgagatgtggaatctcgaagaagac  
catgaaagcatagaggaccgctcgtcgtgggaagaagagcaagccatttagaccgtgaatggtatataatctgaaatccagaatttattag  
gagatgaaatgcataatccattcgtgattttgagacgcaggaagacaacagagagaagtcgagttatcgagtctcaaaaacggcatctctcc  
gtgcgagctactgaaagaatgaaggagaattcaatagggaaagaaaccgaatgattacttctggcatagctggtactccgggttagagacag  
attttgcacctctgaagaagacggtgcatcttttagtacatgaactcgtcctcttcttgacgggttaattttacattaaaacaacagaa

atcacttccgtacgtgatcctcaaagtgacctcgtataaatgctcgtcaggatctggcgttctcgtgaacgacgggagttcagagaacgtcaa  
aaagctgctaccgcagctacgactcttgctggacttctctaggaacgttatgggtgtcaaagaagcttcggatgaagatgttcataaagaaca  
gagtcgcacatcatctacagttgctggcaaaataggccaaaacaagagaaattgacaattccgctaggacaaaaacataaaggaacaaag  
ggagctacttctcgtgcttctcgtgaacagttatctgttattagagataatcaagtacttattgtggttggtaaacaggttctggtgaaga  
caactcagctttccaattcctgtacgaagatggatacagatacaaatgggatgattggttgactcaacctcgacgtggtgctgcaatgtcagtggc  
caaacgctgagtgaggaaatggcgcttgatcttggctccgtagtaggatattccattcgtttgaaagcgttaccagccctgatactgtgataaa  
atacatgacagatgggtgattgttacgagaatccctagttcaaaataattggagcgtatagttataattatggacgaagctcatgaaagatc  
acttaatacggatatttaaggattactgaagaaataatcagtgagaagagattgaaattaattgtaacatctgcgactatgaattcaca  
aagattctctgatttctcggagggtcacctcagttaccattcctggctcgtacgtaccggctcgtatgcatgttttctaaagttccctgttcggattac  
gtagaagcagcagttcgacaggcacttcaaattcatctatctcagcctcgaggtgacatattaatttcatgaccggtaagaagatattgaggct  
acttgcgaaataatggcagatcactgaaatcaattagcagatgctcctcagcttcttattctcaatttattctcagatgccgctgattacaggc  
aaagattttgaaatctgccgaatcaggagtcaggaaggtcgttgtgcaacaaatattgctgaaacatctctacgggtcgtatgatacagtt  
gtcagatcggttactgtaaaactgaaatgtacaatgcaaaaatggggattgatactttacaggtcacacctatttccaagcaaatgtaacca  
gagatccggctgctgccggtcgtactggcctgggtgtagcatatcgtttgtcacagaattagcttatattcgcgaaatgttcaaaacaactttgcca  
gagattcaaaggcgaatctttctaatacagtttggctattaaaatctcttgaattaaaaatatttagatttgaattatggatcctccaccgatg  
gaaactctaatggcgtcttatagaactctggacttgggtgcttggataattacggtaacttacagagataggaaagaaaatgtcacttttcc  
caatggatccatcttctcgaacttatcatcatggcagaagattatcattgtacggaagaggtcattaccattgtctcaatgttatcggtaccgtct  
gtattctaccgaccaaaggaaagggtgaagaaagtgtgagcgtcgagagaaattcaatgttcccgaagcgtatcttacctcttgaatgt  
tttctgcaatggagaagaaatggatgctctgattcatggtgtaataaacatttttgcaggaagatattgaggagagcccgtgatttggcag  
caattgtagaaattatggtaatacagaaaatctatcaaatctactgggtcgtgaatgggacataatccgaaaagtttatgttcatctacttcc  
accaagctgtacagcgaaggatggtaatacacaatttgcgtagtgaatgcttctgcatctgcatgttacatctagctttatggattgggt  
tacttaccagattatgttattatcacgaattgggtcttacttcaaaagaatataatgaatgttgttacaagcgttgacccttactggtagcagaatt  
ggaggagtataattctttaaagaacgggttcgcaacgaggctgaaaattatgaacgtgtgattctagtaaaatgaagttggaagaacagat  
tgcaacagaccgtgagttggatgctcagcgggaagcaatctaccattgatgtacaaaaaacctgctagaaaagcagtaatacgtgcaaggc  
gccacgtcggtacggggatttaagcataaactgctagtccttcttcatgtatattagatagtttctttaggattaggtatcaacaaattgaa  
aaattgagcacttcttctacatcaaacaggaagataatggagatcgtaaattgagagacttaataaatttttttccgaacgttggcctaaa  
aagatattagtgaaatgggcagcttaaaacaatcgtcgtttttagtgacggcgacgtttatcgtctgccaccgttccataggggcatcgatgtt  
ccatccatcttccaatttgcataaactgactgacgacctacgatctgtgtcgtcggacacgttccacaaatacaccttgacattccagctct  
ctttagcaggatgaggtgcatcacaacgtattgaaccaggaacctttgacatgggtgaaagagctgatggggttctgaccattatagtcacg  
gaattgcaagcttgacctgtagtaaaacacacactacacgattccaataatctggcttaaaatttctgtgttctacaacgatgaaccgcata  
gtacaaaagttagattggaactctatgattcactgttaccagttcagatccgctccgccctgaggcttgagcagcttcgattggtgtgacga  
agataccttctcaggaactctttacattgtgcatagtcaaaagagaagaagcagaaggagaaagtaaaataatagggtcacgatctaaaga  
cttgttaattgacagaagaacatggcaaaacaaaatttaacatacttcttcttttagcagactgtcagcatctacggcagctgggcccattggagc  
cttgttcatatggatgtattctaaacgtctttagcgaacgagagaaaattctaataaaacaattagtaaaagtgaattgagacgcaagactaag  
gatgaaacataaccgtaggttgcaccgtgaaggatagttatgattggagacaacagagaattatcttgaaccattttactgtctcgttttt  
ctccagcttctgttctcagcgggaatctcctctgtcttcttggcttctctgtttctataggaatcattagttggtttcattataagatatgactcgc  
atacttaatccaacgatatgttcaacttcagcagaaccttcaaccaagagatcaagtcggttcttctaagaatgtcaggttgcgaatacactact  
ctgagcattgttgatataatcagcaatactggaatctctcaaaagccaagcaaaaataatgcttctgagcgtaaatggttcattcgtttccaactt  
tacaattttgatgttcatctaaattgaagggttgggggactctgaaaaggcaacaaacttggcttccgatattttcctacttgggagctgtcat  
tttctgtcgtagaagtttgggtctcgtttttattaatacttggtttaaaaccaacagtgcatctaatgctccatttccagtgcttaaaaaaaaa  
gggcaaaaggtcaggtagttcaaggcagcactgagtttggtaataataaataatctcgaataactgatccttcaaaaacttctgaaataa  
attaaatttaagcacaatggataatcattgaaaccttttgggtttacatgcttaacaatgtctaaaaatgaacagtcctgtaaaactaacact  
aaacgttctcacaatgcaatggaatgaaaagattactaaggttcattctacacaaaaagtaatacattacgaccaacgttctgacgct  
tcgctgttcttctaacacagaagcaatagatattcaattattataggatgcttggctaccaatcaaacagatgtatatacagtaaggctgta  
atttctaaacaacaaagcctctggttaggaaagaatgtaatctataggatattaacaatcgagatgattgtctatgatttaagtaacgaccagat  
aaccacaaaaaaagttaccacaaagaaagcttttactggcaatagtaggttctcagctttaaactcaggcttcatatgagggaagagtaacac  
ttcacgaatgggtgtctatcagttagaacatgaccaaacgatcaataccaatacccaaccaccagtaggaggcaaacgtactcaagcgt  
gtacagaagtttcatcaataattgagcctcatcatcacctggctttttgacgagctgtcttccgaaacgttcacgttgatcaagatgtcattc

aattcagtgtaggcttgcaaatctcctttgtggcaacgaaagcctcaaacgttcacacaaaccagcctcagagcgtggtacttagccaaagg  
agacatcatttgaggatgtccaataatgaaagtagggtgtagcattcgtttcaatgaattaccaaccaactgtcaagaagcagagagctggt  
ttgaggaggagaacattcaacgttgtttggcgcaagatctcagaaagcattagctcctctgaatggagaagatcaccaggagggaact  
taacgttaagcgtgttccaagtgtcaatcatgttgatcagggcgcaaggacgagaaaagtcaagctcccagcagggaccttcaggacctca  
ggatgataaggaatcttgaagaaccgcaacttcttaaccatcagatcaattcttcagctgtgccataagatcgaataatcagcgtag  
gcttgataaaattcaagaagtaaacggttatgagtcagctggcaccctcgttacggaattgacgtccaatttcgtagacacgatccaat  
ccaccaacgacaagcatctcaagtacaattcaggagcaatacagatgaacaagcctatgttcaaactcgtgtgatgagtgacgaagggttagc  
ttagcgccaccagcaatcatgttcatcatgggtgttcaacctcaataaacctcagcattcctaaaggaacgcaagctggtgatgactgact  
acgtgtgacaaagcgtcagagtggtgagcgttattcaagtccaaataacgttgacgataacgagttccaaactcctcacaacatagtgct  
ccttgggaagcagcgaagcaagggtgagcaaaacacattcagcagcaaaacggagagctccatcagcgcggcccttgggtatggaac  
ggccaggataaccagcaaccaataatgtcaccacgtggatgtctcgtgtgagcagcataatcaacacgatcagcatcttggacttgccac  
ataaattgaagcttgatccatcagcgtgaatctcgtagaagcgaactggcaccagcgtacgaagaccgtgaacacgaccagcagcagttac  
ctcaacatcagttgtctaccgcgtgaagactctcatattccttaataatcgggaagcttagaccaacctggaatttggagggtaggga  
ttgggattccctagtgttcgcaactcttgatagcagagaacggttctcaaaatattgggaaggatccaattcttctcgttttttagcgtttta  
cctcaggaggagcagtagcagcctctcagcgtgcttttggcttttagtaattcacgggcagaaacttttccctcttctcatctcagtttgaaa  
catgttcccagtaacagggtcaaggacaagagccttgacacctctgtaacgtcgttaacctgtcagcactcattgacctgaattgagggtg  
ttgggtctgagtgaaaatttgggtgaaggtaaattatcttctcgtcaccaggacaaaagctccatcgtattaattagtagatgatacatggtgat  
aagtgacgggaataataacacgggataattagttgattgagaataaggaatgggtatttttagtagtgattgaaagttcattgaagctcta  
atagctacattagtattatgacgaagcataggaatgcttcatgacgcactgagatgtattaataaacatgttaataagctcgatcaacaaaaa  
ttcacactggaaaattatctggaaaagttatctgcatatagctttcttttagcaactaaatacgtttaactcaagaaccagtcatttcca  
ttggttctgaattgtatttccagctattcgtttgcttctcagtaacgtcgttaaaccgatatacttttagttttataaaataaggtaatatt  
tgtaatatttagcttattaataacgataattttataggcaaaaatgggaggatcaattgtaaagaacattgtacgggtaaagaacacagcac  
agaaaaagtagtaataataaaatgctcttaagaagacgtcaatacagaaggacgtattgtataaacctagcttgactaccttctcaatt  
tattcaggaaagctgtgaagaggcttttagctttatttacagtattcagaagttccatgaaacaatagaagcaactggactcgatattctc  
tgacgagttagaatcgatataatgttttatgatcttcaaacacgcaatgacgtctgactgcccagagaaaatagctgataatttttaaa  
tttctgtaaaataaaagcaattcttcaaaagcttcttgataaagttgggagaattgatcattttaataaccctataagcaattcacctgctga  
cgaggattatcagtttcttcaaatgaagtactggtggatggcagcggcaggagaaaaggatggaagccaaggtggcgaacatatgagaggga  
gtgctcagcagatcaaataagatttcatcttgaagcatcaatcggttttgggtttggagacagagggtgaaaatttccaagttaacttattcat  
tgacgtataatcaccagccttatcaaaaataaagtgctcaccataagcacctcccgattaaagttcgttgcagtgagacataaacacagtg  
tgcttctcgtgatccaattctggcagatattaaagcttcatcttttcaaatgttatgcataggaccctgtgaattaaggatthaattcgc  
tgggtccgtaccggcaacaagttccaatgatcaaaagcacttgccagatgcctttgtttcaaaatggtttcaccataatcaagcaaaagat  
gttgcgaagtgtaacgggagttctcgttaaaatattctttaaataatccgggtttatgtagaaaatcagccaagtgaacagcggaggccgat  
ccaacataaagaatgctgaatgacccaatgggtgatttgcaaatgaacgaaagtgttcaaatccaagtagggctctatgaaaaat  
ttgaaacttctgcagttgacatttgatacaatatagagactgagctgggttctacaatccaaggatcgtataagaatgtaaaagctgaaaagt  
actcttgcaatgaccacagttgatttcttctttgactaccacttagaatgtcaacaaaagaaaccaagcagtttcgaaactcagttgtgata  
tcattgaattcatcataactgacgaagatgcctatccgtgaacgccacatctccatcgctttcacaagcaaaagcagagcgaattgactttt  
gatgcaagcatgggcaataactcaaaatatcaaatcattcactgaatttccaagggtgggtatttctttggtaacccgaagactctaaca  
agaaaatagtttgcgaataaccacgaatcgagttttattcacataagaccaaaaggaggtgtagaaggaattcggtaggtcatgatttca  
cagttcatctcagccagggctgagatcgaagagttaccagctcattattgctgttgccaaagtgaaggagaggaagaaggaaaat  
attgctccgacagcggcatgcagattcaactcccagagagatcaagagtggtcctgttgcattgttaatttgggcttgaaagt  
attcaaaaacatggttcatcttgaacgaacaaagaactattttccataaaaactgaactaacaccagctggttactcatctgctgaggtg  
cgttagagaacgcttgaagttctccataattcgatcattgaaaccaatagttctgtggcccaattaaaggagaaggttggaaattcatat  
aggtttctcctctgctccttcaaaaggaactgaagatttgatcgtacaaactcaactgcttacttgaataaaaagtagatccttgagggtatag  
atgcaaaagtaaatctgctgaccccattagatgaccaagcagagacgctacctgtttctataggagatccctcaatggtgaattgattgga  
agtgtcccagatgactcattttctatactcggaaaattttagctgtttatagagagaaaaataagtaataatgttaataataataagaaa  
acaatcaattcatgaaagccgatgaatcgtgaagttatggaacgaagaagaagaagcgtctaaaggctcaggatgaagggtttcaaaaaa  
caagtagtgtttgtattatattgggagaactgcaaaaataaaaaatgaattaaccacaaaataaggctagaacgagcgttaattgacgag  
agggaaagagttgttagcgtggagtagagaagcaagtaacaaaacgctgacatgaaggatgaaagttgacggctgagaagagtgacata

gcaatcagaatttaaggaataaatattggaggactttcttttctttatctttccaactaatgtgttctgttctgttctttcaatgtttacaaa  
cattcgcaaatcttaattctttctttcatcctaaagacatgataattataattgattgaacatgaattgactcgaagacaaacgaacaactgg  
tatattaatcatatagttaaaaattttttttttgttgacagatctaaccatgctaaagtttcttcaatcagatccagcccaaaaaatgctata  
gatattactagaagaataaaaaataaaaaatagatttcagaaagtgcacgaaaaggcactgttttaagcctgacatgacatacaccctcttt  
gtagaaaaatgcaaagcttgttcatacaagtcctacaaccaccccttaaacggatgtgtgaaaagtttctcatttgaattcatttcaattgtcttt  
ccatttttcaaaaaccataaacaacagaaatgtatgctttctattgtttatttactatattctttaccatactagctatccctcattctacaac  
ttaaacctgtctcgttatattatcagatgaagaggaccgattcattatgcgacatttttttacgtaagctcaacacgaaaataactatgtt  
atgatttcaataaactgtgaaataatactaatgccccctcgtgtatgctatagtgctgcccagcaaatgtactgtaaataatgaagtc  
aaaaataatccaatggaagacatgttcaaagtaacctcttcaaatgatccaatattgaagaagggtttttcatatcacagcagcattataaat  
ttgtaaagatttctgataaaataaccacaatgaaaagacagctatattgcccaggaacctgactgataataatcagcagcagcattat  
aggtaattagccattatcgcagactcttcatgcgaaaaacgaaatatttgggctcactcattactctttcattggtaaataagaacaaactaat  
tacagaagagggttctcatttgcgtgcttcatgagaaagcaccattaactgaagattttcttgagcacgaacaaactcctcgcaagagtac  
ggagtatctttttctttgtattttttctttctttttgtttcttttttgggggtttttttctttctgcggttatgtcgaattgaagaatgcac  
ttaggatcgggggttttacaattttgttgcgagattacaaaacataggatggatccataatgggtactgccatttctgctaattttgtataat  
tttcttacagcgaatggctgcgatttcttctacattatgttggatgcgcttataagcctttttctgaatacagatcatcttttttcaata  
catcatttacagggcgttttccaaaggggaaaacgttcaataatgtggcgcgacactttgcttaggtgttatactatgggattcaaagatc  
attaatatgttgtctacttgagtagtctcgttcttaccgcagaattgggtcaatttcatctatctctttggatcttttagcgttgctatgtcgttcta  
tagtcatgggtgatattctcattcgtatttaccaaaagattgagtttctcagctcttgggaaatacgcgcttccctttgtcccgttaact  
gttgcgtcgcgactggttccgtagttgttcaaaccttctcgtctcgtatgagccgcaagtttatttgaataccatcgtcaaacctataattgttgg  
caaatgccattactgtaggattttgtgtcattgctgtttttatggaggctgatttttacaataatcccagatgctcgtggtctttaccagtttgc  
cccattgggttcttggtaagggtgcttttgaatcattatgcaggcactcaatgtgaggatatagcagattcgtatctacaaaatatttctttatt  
ggaattataccaacttttaattatcatgtcaggatttgcgtatttctaattcctttggttattttctcattttgtagctgtctttgcagtttca  
ctcatggagtgcgacagcaattcacagtggtctggtgggctactctttcgttgggactatggccatctccaattcgaactcggcgaaatag  
ctcaattgaccttctcgtgttataggcgcgatttacgggttgcgtgcatcttaactacatgatctgtatttttggaaagcatctatttgggaatcca  
aaaatatcgcagatagtttcttaaaaataattgaatactcattacctacagcagtaaaacatgagacagaaaacttaccacctgacatttctc  
ctaaaccccgatatactctctcgtctctttatcgaaaaaagacctccaatgaacatgaatgctctacattgggttacaataatattttg  
tgtctatcttttgcgaaccaagacaaggatcggaatgcgtgaatatggacatgctcaaaaacaatccaacaaaattagaaaaagtggtt  
ttctgttcaaaaattttgtaaaacagacgttttcaaggacacggagaaaaaaatcactgcgttctttatgtatacatttgcatttctttt  
attatttttttttgaattgtttaaataaacaagagtataatgtattattacatttcttttgtttacaatagtaacacaaacatgttct  
gctctttttgttgattactgtaataacagccaacatcttaaacgaaattcaggtcgtgttcaatgatacattttcgtatttctgtt  
gcctccaatttaccagctactactcattttacgatttcaacttgcactacccattgttctaagagtgaattgttttttgcctttattctt  
aactactttactaaaatccctttgttttaactccttgccttccgtaactttggatttgggtgttttgcgaagcaaaagcagcaattgaggt  
gtttatagcttataaactgtttatcatggctgggtataatgagttagttccaatacaacgatgtatgtatagcttaaattgatggattata  
ctcgtttactaacatattgttcttagcaatattcagctttgaaattcctttcacagaatggcaatgaaataactaaatattcaatcctcagaatca  
tctttttgactcaaaagcgggtttcgcgtaggaatcatgaaccggtgagttcattcaagttcgcgaagaagaaggccatggtgaaagtta  
tcgaagaagcgggttagagctgcttttaattgatcgtacgtgcttctgagacgaagcgaacttacaacttaactttattatggttctct  
ccacaagaaatagacagactcataacgcgcgagttttctacagatgcaacttcaaaaccaccaccaagtggttgggtggtgatttcttt  
gcgcaaacgaaagcagcagctgctgaatggaatggcaatacagccactatagttccttataactacagcagtggtgacctaaactata  
ttgttttctgaaatgataagcgggtgaaccggtcgtacctttacaactttcaattttggttagtggaaatctgagcaagactctacaccggcta  
cgccgagctttactttgccttgcgaagacggtgcaatcagccagaggtaccagaaccgattcgttgcactgcaactgcaaccgagcaatttcaa  
tccaatctctccacctccaatgtcaatccaaccttagagaactgatcaaacagaaccggaagacggcccttttccgagctactatccttaa  
ttttgaaagaaccacacatgaaatgcgaatggctatgaaaaataatcaaactgagcagatcaagttgctcattccatggtatgctgtacatgtc  
tcaataggaaatcgtcagcttgcgaagagcagcaaaagatcaaccaccagcctttaaaccgtttttagactattatagaaattgtgctaa  
atctttggataatctaatattgatcagctcatttgtgaggaaactttaaataagaaccttgaaggattatgataatgataaaaaacgcgt  
actcaaaaaaaaagatttgcaggaacaaagtcgtgattactatactctttaaactcgttatctatcgaagaagcgaaaaagctcttctgccgata  
aagctaaagagtcaaagtttgcagaaaaagaaggacttgaacttcaagatttgcactactcttatatgcaggacatcaatggaggaaga  
aaaggtcaggaagtttgccttgcacttaccttttgcgtcaatgactacagcttgcattctactatggcagaaatagattcaattcgaccaag  
catcataatgcttcaggatgttgaatgaagctaaacaagattttgctttgcgagctgaacgtgaagagagaagaagacttttagaaactag

tagtcgtgagttagatgatcaagatgcagaaattgctgctcaagcttaccgagccaaaatcgggcaagatacttcggctaagcagggttactgtt  
agcttttgcaaaatctaatagtgatttacagatggatcaaaagctgggtggcataaatactgggtggtattagatcatggtaaaatctgcaata  
ttcaattggaagcaatcttagaactcatgaggagcctattgatctattaatggcaacagttcggattcctcaatccttctagaaaaatctgctt  
tgagttaatcactcctcagttacgtcgaattatcaggcagcttccaagacggaaatgattcctgggtgaagccatacagatgctattagcga  
agtattcactcaaggaagaagacattctgcttccgaggattctaccattaataaatatggatcaacgtcttcgattggtaaagctttacagcgtg  
ttgcttcggtagctcccctggacgatacagcgggagtgaggagacttaaaagataaaaaggcgcagaaaccaatttcctctcgaagcggg  
aaaagaatcacaattagtgaccaatattgtgctgattgtcgtttacatcacgagtggaatgggtgctattaatttcggctgtctgtgatag  
attgttcaggaattcacagatcttaggaacctatgtgcaaggtgagatcactagattggacaaacttcgacagagacagtagaattgctgc  
gagccactgggaatcaattaattaatgaagttacgaagctaaacttagtgaaccgaacgcgaaatcaattgaaaaccaagaggaaagggttc  
tttataaagaaaaatgtacaaaagctttatgttcaagctatagccgattcagatgaaatgctgcattatgatgctgttgacgaggggat  
ttgaagcaagtaattctgcatcgacaggggtcagatgttaactatcaatcagtgattcttgatccctcgaagagcaattattaattgctga  
attgttgagttgaaatgggtcaggtttaaattcgaatgaagctatcatggatacgttccagcgcgggcaagcgttcttatgactaggtcgacc  
aataaccatagtaagataaattttattctggtgtttatggatacagtttaattccactgttatgaataatgatgttgacaagtaaggctgt  
ttactttcggaaaactattttataggcttaataaacaggaaaaatagctacataggaacagctacatttcgcatgcaactttacaagataat  
agaatatcagtgatagctgactgttttttggttaccttgggtgagaattgagtgattgaatattttagtagcggctatgaacgacaaactcta  
gtcttggctcttggctcttcttggcaagcgttggcagtaacaaagaccttctgctctgttcttacgttgcttgcgttggtaagcggcaacttt  
tcgatgggtgggcttgaccaacacggacaagacggtaatgaggtcaaaacttctcaagcctcattggagtcgtagatcaaggcaaacagct  
agacctgccaccacaaatgagtagcaagacaaaggcagtaaatctcggcatcggctgtgtacatttgagcaacttttcgcaagttcatt  
cttagaaagattggccttaccaggtgaagaatcgcagacgttctagttagatttactattctcaaaacggttctacgttaacttgacattc  
agctattcaagccaaaaccaaggttttctaccatctgcttcttgaagcaagcggtagtcataaacttgcgagttctgattgtcacggcctc  
actcatttagcaactgtggtgactgatggtgtaaaagaaaggattctcagtcgagtagcaggttttgcctgggtgaggaaactgtgactccttt  
ttggttatgaaagtcttaacgcacctgacatggcgtgtaaatgctgccaactgttctgtaaaagctcggtaaaagtcaattcacttatctga  
tcaatctacaattgtaaaggccatcgggtccgtagctgtaaaacaaacagagccatcccgtttgattgtaacacatcgtgatttaacgtttgtt  
cggcttgatttttagtccataaaaacggtttgttaattttgttgggttcttttttagcgcgttcttgaatttaggtcccaatagacgtgaa  
ctagtaaaagccactgatattaagcaagctgcttcttctgcccattatgctgcaaaactatttggtaaaactcattgcctttttcattaacgaac  
cttcaggggttgaaacgagtgctccagcacgatcaacgacgtctcattgactgctggaagattcaaaatttggggaagtgatctgaaaaac  
tttaggatattgaaatagatgaaatcgttcaattggcttttcaggcgattttacctcacttctaccactaagggtgaagtcaactgaaatggga  
gtctttggctcccataaaggaaactctgacgattcctgtcttcaatgaagaacagggattcctcagcactgaccgtatgtcattttggcaattg  
ctactccctggatccaacaagcaactgaatggccttcttaccctcaaaacaaagaatacgtcgcctaatactcctaagcctggaacca  
ttctgtatgaacgtttattcctagctgaaatgagacattatcgtttgttgccttagacattgatcagcatctacattactttcatgaatggcaaaata  
atcctcgcgttagctattactggactgagtcggaacctgggaccagcatcgcaaatatctactcaaatcaaaatgaccacacgcatacgtg  
ttattggctgctcaacgagcaaccattcggctactttgaggttattgggtcccagaggaccgaatcgtcccttctcagccttggcataccat  
gatcggcgtttatgccctttaggcaatgatcgtttccgtggcctcatcgcgttctgtttggctatctagattaccatagctgtttttggatg  
attctcgaactcagcgtgtccttttagagcctagaaatgatacaaaaagtttattgattaccttattgctgaaaataactgcaagcggctcgaatt  
gactttctcataaacgggctgtttcatggaatattctgcacatgttcttctgtcttgagaccctgatttaattaccgtgctcctcattgtg  
gaaaatgatcctgctgcagatgcttttaaccacttagaaatccgaaatattataggaatataagaatccgaaactttacattttatgttcca  
atgattatggaagcaaaactgacctttccgtacttataacagaattcatgtatgtaattattgatacttaagaaactttcaaaaaagttgtcaatt  
gtgatgattcatcataaccgtaatttatttattcatttagcattaaaggctgaacgctcactatttttaatgatagtgcttctaggaggatcac  
gttctctgtaactcgggtcctatacgaatcatctcgagaacggtaggaagatcgtctgtcatcgcataacgacttctcggcgatagtaacgatc  
atcgtcgtatttagagcgtgctgtgaggtacatgatacgaatcttcatctttgttcttctgtactctcgaccctcctcgggaaggcctgaaga  
gacgacgtggttatattcggatcgtcacgagaatgacgaggatagatggaatcttcttctgtatctataagctggagagcttgagcgaagacg  
ggattgagaccgttgagttgctgtctatctgagagacactttgagaaaagtaacatgaatgagcagcatcatgattaaaacgtttgtcatctg  
aaataagccttttcgacacttctttgtatcgaactctataaaagcatattgaaaggctatttcgggttcttatcgcgaataattggcaagaattg  
atcttgccaaaccgggagaaaataagttccaagtcctgctttagtaacggggtcaatttcaaaacaacaatacattttcaggaggagcaac  
atgagcaaatggcaaatcgcctaccatttctaaagtaactgcttctgctctgcttctgttctgttctgttcaaaactgttttctcatcatca  
gaaataaggcgttcttcttcaatttaacggtagcagttgttcaggcgttggagaaggcagcactaggcgggtcaatgaatcagaggaggatc  
aggaaaaggatcgtccaatataatggatgcttgatcgaatattctcgaagggttgaccctcatcatcgaatagcgtcattttttgtaaa  
gatcaaaacttctgccactcgacaaaaataggatcggcgtccaagcttccagatggctgtgaatgtgatgagaatggcttccacag

acaagtgattcttcatggtgaacgggaatagaagctgtgctcatgctaacagttccagccttgttggctgagattactgtgaaattcagcaggg  
aaaaatcgatcacctatattgagtaaattcaaaccgagcgtcctccatctccagtcgggcctataggatcacccgttggcatgttaatttgg  
gaatgttgtaaaaggagcaaaattatagattttagtttcaaaagcttgagaaaattctcacaagcttggggtgcctcttctgtaagcaggtcaa  
tgacaagatcccaacgttggtttctatcaggacggacatcttaataatttctgataattcttagaagaagaaaaataaaaaacaagaatt  
aggccgagtggttataaaaggaacaactgactcaagaacaaaatcctaatttcaaaaaatttagcggaaaccaataaaaaaagtaa  
atgattaattcaaatTTTTCCGTCACAGGTATCGCAATAATGGAAGGAAATCGTCTGTTTTCCAAAACGCTAAAAAGACGTTGTTTACGGTT  
GTTTTGTCGATACCGAATAGCGATGTGTAGGGAGCACGGTTGCAATAAAGCGCTTCTGGTGATTGCCTTGGTAAATAACAAACCAATTCAATT  
CAACTGTTTTATTAGGATTATTAACATGTGGCTTTCTTCTCACAAGATGCAATGAATCCAATAAATAAAAAAGTTTTATGAAAAAGA  
AAAGTCGGGTACAGCTATTTCTAAAAATGAAGCATCCAAGTGTCTAGTTGCCATGTGAAACCTGCAGATATACAAAAGTCATAAGCAC  
CGACGGAGGTATCTACCATATTGGATCTGCAATTGTTCAAACAATGAAATCTGCAAAGTCAATGGATGCTGCATATCGACTGCAAAAGACAA  
ACCATAACAAAAGTATGTTTCTGTTACAGATTTTTCTGTAAATGCGTTTCAATCGAACAGAGCTTCAATGAGAGCATTATTAGACGACATC  
ATTTAGGAAAGAAACCAATTCATTCACTAGGAAAACTACTTTTTCTCGTCTCTTATTACTGTTTATAAGTAAATCTGCTTAGTTATTCCATC  
CTTTTCTCATGACAAACAAAAGCTTCTGTAGCTCAGTTGGTGGTAGCGTCCCTCATACTAAATGACAGGGGAAGGTCGTGAGTTCGAGCCTCAC  
CAGAAGCACCTATAGGTCGGATAGCACAGTTGGTAGTGCATGACTGTTAATCATGAGGTCGAGGGTTCGAGTCCCTCTGACCGGTTTTTTG  
ATTTACGAATTTAATCGACTATATTTCTTCAATCGAAGAAGGAATGGATTGATGGCAGGGTACCAAAATGGATCCTACCGACTCTGAACAG  
CAAAGTGAATGGTCAACGTTGTACAAAAGCAGCCGATATACGGGATTTCCGCATGATCACCTTCAGAAATGGCTCAACGTTGATACATCA  
GCCGTTCTTTGGACGAAGTACTTTTTCTGGCTTTGAGAGGAACGAACATGCAGGTCATGAAGTGAAGGTTACCAATATTCAAAAAA  
ATCATAAGCCAAAGCAATCGTTACTTAGGTTAGTAACCTCTGTTTATCTGGATGAAAAGATCAAGACATTGGATAATCATGTAATTGCTTACCACAT  
CCTCATCAAAAATTTCTGCAAGTCAAGAAGGATTTAATGATTAAGAGAGATTTTAAAGCTTGATTGAACCTTGCCTCCCGGTGAAGAA  
AATACGAATCTGTGACGATGAAAACCTAGGACTGAACGTTCAAGTCGGTCAATGGCCTTTTCTTTTCTATATAGCAACCTTTAATTG  
GAAAGACAAGTTTATAAAAATTCAGAGGATGAATCCTCTGTTTATCCAGACAACGATGCTAAATGATTTCAAGAAGATCCACCGAAG  
GCATAGCATCAAAAAAACACTCATAATTATAAGGAAAAAAGAGAATAAACGAAAACCTGTTGGTTGGTCAACCATGCACTTTGTTATG  
GAAGCTGGAAGCCACTGTCTGAAATCACTTTTCTATAAAAACAAGATCTTCAAACAAGAAAGCAGGAAAAGAAAAAAGAAAACAAGGAA  
AAAGGAAGAAAATCCGAAAAATGCTCACAGAGTACTCTACGAAGAGATTGAAACGAAAAGGAGAAAGCAGCCTTCTATGAAAAAGGA  
ATGTATAAATCAAAGAATGAATAAAAATATTGAAAAAGAAATTTATGGAAAATTCAGTACCAATGCTCAAACGGGAGAGAACGACTTC  
TCTTTGAAAAATCCTTCTACTAGGGGAAGGACCCTACTACCAATGCAATACTCACAACGGCATCAAAAAGCATTAAATTAGGCATTTT  
TCGTGTCATTTTGTAGATAAGAAAGTAAGAAGACTTTCTTTGTGTACAAAAATAGGGAATCGCTTTGGCAAAGAAGTGGTCAACAAAGA  
CGAAAGAATTTCTCGATCCAGTATTGCCAGTTCTTGTAGAGAAAAGAAATAGGAGTTGGTAAAACCAATTATAAAGAGAGGAATAATCTATT  
TAGTGAAGAGCAAGATGGTGAACCTTGATATTTAGAGTTGTGCGCAATTCACCCGGCATATTCGAGACAGGCTACAATTAACATTGGTA  
CTATTGGTCACGTAGCCATGGTAAAAGTACAGTAGTAAAGGCTATCTCAGGCGTTCATACTGTCCGTTTCAAAAATGAGTTAGAGCGTAACATTAC  
CATCAAGCTAGGTTATGCCAACGCTAAAATCTACAAGTGTCCAACACTGAGTGTCTGCTCCCGGATGTTCCGCTCTACCTTCTGGCAAGGAG  
GACAACCTCCTGTGAAATTTGGCACTCCATGAACCTGGTACGCCATGTCTCTTGTGATTGCCCTGGTACGATATCTTATGGCAACTATG  
CTTAACGGTGCAGTGTGATGGATGAGCTCTGTTGATTGCTGGTAATGAGTCTGTCTCAACCCAGACCAAGTGAACATTTGGTCCATCGA  
AATCATGAGTTGAAACAATTATTATCTTCAAACAAGGTTGATTGATCCGTGAAGTGTGCTGCTGAAGAACATTATCAATCGATTTAAAGTTC  
ATCAAGGTCACGTTGCTGAGAATCCCAATCGTCCCTATTTCTGCACAGTAAATAAATGACGCTATCCTTGAATATATTGAAAAAGA  
TTCCATCCGATTCGTGACTACCACTGCTCCTGTTAATTGTTATCCGTTCTTTGACGTGAACAAACCCGGTGTGAGGTCGAAGATTGAAG  
GGTGGTGTGCTGGTGGTCTATTCTTCTGGTGTACTTCTGTTAGGTTAGATGAGATTGAGATTGCGCCTGGTATTGTCAAAAAGATGAAGAGGTC  
CATCAAGTGTCAACCATTTTCTCAGCATTGTCTCTTTCTGCTGAACAACATGATTGAAGATTGCCGTCCTCCCGGTTGCTTATTGGTGGTACT  
ACTGTTGATCTACTCTTTCGCTGTGACCGTTGGTGGTCAAGTCTTGGTTCAAAGGCAACCTTCTGAAGTGTACACAGAAGTCAAAATCAA  
CTACTTCTGCTCGTCTTTGGTGTCAAGAGCGGCGACAAAAACCACTAAGGTTCAAAGCTTGTAAAAACGAGGTTTGTAGGTA  
CATTGGTTCTACTTCTACCGTGGTGTGTCATGATGGTCAAGGCTGATAGGCAAGATTCTTCTACCGTCTGCTGTACAGAAATGGTGA  
AGGTTGCCCTAGTAGACGATTGAAAGCACTGGCGGCTATCGTTGGGCAAGGTTGTTGAAGGAAAAACCTTCAAGTATAGTTGGGTT  
ACTATGAGCATTGATAAGATGACTTTTACTTCCAGTGAAGTGGTGTCTTTTGTATGATAGATAAGCTGTGATTCCATGTTTCTTGA  
CTATTGAAGAGATTCTGATTCAAAGTAAAGTGTGTAATAATTTCTTGTATGATGAGGTCATCCAGTTGAGAGTGTGATTACA  
CTACTATAAAA  
TCTGATTTGACTACCTAATAAAGCAATCGTACTTTATCTGTAGTATTTCACTAGACATGACATTATATCATGAATGTTTCCGCTGTG  
GATTCTTTTCTTCAATTTATGCTCATGAGGATTCGGCTTCAAATAATTTGTTTGAACAACCTACTGTTACATTTGATAATA  
GATAATCAAT  
AAATGCTTTTTTTTTTACCAGCTTCTTTAGACGTTTGTCTTACTTTTTTACTTAACACTTAAACGTTTCTGTTGACTTACAGAGT  
ACAA  
CGTCACTAGCTTAACACAACCTACCTATGTTATGTGACTGCTTATGGAAGGGGAAACAACATCGAGAAGAAAGATAGCTCAACATCCA



acaccatggcagagaaggctcagaaccccatgaaggagcttctgtatctccaagctcgtcttaaacatttctttgggagaatctgggtatcgtctta  
cccgtgctgcaaaagtcttgagcaactttctggtaaaactcccgttttccaaggctcgttacaccatccgtcgtttcggtatccgctgaacgaa  
aagatttctgtcatgttaccgtccgtggcccaaggctgaggaatatttgagcgtggctcaaggcaaggagatgaattgaagagacgcaa  
cttttctgccaccggaacttcggcttcgggtatccaagaacacattgatttgggtattaagtacgatccttccattgggtatctatgggtatggactttat  
gtcgttatggaccgtcccgggtatgctgtcactcgcgtaaggctcaacgtagccgtattggttccctcacaagatcactcctggggacactatca  
attggttcaagcaaaagtatgatgctgttttggagaagtaataagaagatagccatccaatcctttgcatactgaaaatttaattttgttgg  
tgaactagttttgctagcatattttgactttgttgaatcttaagtagccgtaagcagaatagggaacacgattagaaatgattgttaaacgg  
acatatgtttgctatgctgttacgatatttctatttcttagtaattagtccttattttgtttgttcaatttttaatatatgctttgcaaatcattt  
tactccctaatgccacatatcttatgcatgaaatagccgcgaagaatacaaaaaaaaaatttataaaaaaactctataaatctcatcaaaatagt  
tctgtcgtctgatgaaattatagataacactcagctttttatccgtaagaacataatccaaaaggagcaagagattgaagtatcatgcaaaatt  
aatacaaaaatcaaagttctttcatatctgtatgcaaatatgcacagtatcttttaataacggaaatatacacatgtcaaacctgtgatttta  
aaggactttggttacgcagaaagaaccgatgattactctgtttatggcttttctaaacccgcacaaaggtcaccaccattcacagaatcacctgt  
tgcataacagctgttttacgacaccactgtgaggagcactaatacaatttccatcttcattgctcaagacagcaataatcaccttcttca  
cctcggagccttcttaacacgaatctcgacaatggcaccactcataggagcagcaacgtgtccggggtactaggatcagcgcgagcagagt  
gactgtctctgtggcagccttcttctcaatgataacgtgacgattttaccattcaactcaaagtaaactcgcgttgcagtagagagttga  
ggggtccaagggtataaattgatgatcaatgtctacccttctcaattccacatgcatttctcgttactctgtggcttagataagaagaaccga  
gtaggaatattagtcaagtcaccgtaacggtcaacaaattggcggtaatcctcatacacaccgggaaattgggtgaaagcgaacgtctgcat  
ccgtaacatcgcaaaatttctcagacagaaagttacgaatagcatcaaagtcagcaggaggcaagaatttacctggacgatcagacaaaggtg  
acgacgtccctcaggacattgttacgcaaaaggctcggaaatccaccgtagggtgaccatcaagccttggaaagaatcaagaacagatgcg  
gggaagtcgagagaagcagcttttctcaacatcttctcagaaagttgtttggaccataaattgagccaagtcaccaacgaccttggaaagtt  
ggagtaaccttaatgatgtcacccaaaagattgttggctcaatgtaagccttcttagttcaaacattgggctccaatccaatgagcttctg  
gaattgaggttagtaagttgaccaccaggaattcatgattgtatacatcagaatcagcactcttagttcggctcgaaggagagtagcaataa  
gcgtatttactccagtaattgcaatctcacgtaattgattgtgtcgaattcaagctgtctatcagtaccatccactgaggctaaaacggcacc  
agactaggttgggaggtgaagccagacatactatcagtagcaacatcgacgacatcagcaccagcttccaagcagaagtcattgaagcaacg  
gcagtaccggcagaatcgtgactgtgaatgaattgtaagtcaggatacttctcacgaataccaccaatcaaatgtagcagctttaggctt  
aaaacaccagccatcttaataccaaggatgaatgcctaagttaacatcttcaacaaatcctatgtaataatctaaattatatttcttct  
tttagcatgtcaccagagtaacacatagtagcttcaacaacaccaccagcttcttagcggcatcaacaccgagagaaaggttattgatgtcatt  
caaagaatcaaagacacggaagatatcaatacattcttcttggcttgcacagaagaaataataacattatcaggcaagctagaataacat  
aagccgtttgacactcgaagcagcatctggaaaggaatgttcggtaactacgaagtctacgaagtctatccaaggacattcgtaaaggaa  
gcgcatggaacatcaaaagtagcaccacccacatttctaaagaataagcattagcaagtcagtggttagtcaaaggagcagatattaacgag  
atcaatggtacggacagcagtagccaaaagagattgatgagcatcagccaggtagtatccatgatcaagccaggcttatgattgcaacagcc  
ttagcaaaagcttcaggaccttctcaacaataaattacgccagccttctcacatggttggtaaacgtcaataggctcgcattagagccaagt  
aagttgggcatgataacatcagatttcaaggcaggttaccattctggccttgattgagctgcattaacggcacaatcccagatagtaagc  
agcttttgaccacggttacgggagcagatataactgaagagttcaggggtatcgtcaataaaagttgtccagcagttaccggaataaaagttc  
tgggagagaaggcgtaaaacgaagttatattagcttccaccacgaacacggaattcaattaaagagcgaatcttttacgtctcgtaaactc  
ataagaagaatcacgacaagtaactttaccaatggaatcataatggggagtaatgacggaaccagcaaacattagcaccgtcaagacg  
aacaccattacctcagcggtagcgtatacctcaattttaccaatcggggacaaaacccttgcggatcttcagtggttacacggcattgaat  
ggcaaaagccagagactaactggtcttgagtaaggcaattcaggaaggggagaaaccggcggcaatgtgaagttgagcagagacaatg  
aacaccagtaatttctcagtgattgtgtgctcgaactgaatacgtggattgatttcaataaaataatgacgtccttctgatcaataaaaattcag  
ctgtgcctgattcaataacttcttagcaatcttaatagcgtcatcgtaaagagattgacgaatttaggatctaagctttggcaggagca  
atccaacaacctttggtgacggcgtgtgacggagcaatcacgtcgtgaagatgaaccacattgcatgctggtcggtaagagctgaacttca  
atgtgttagggcgttaagaagcgttcaataaacacagttaccatcaccaaggaagataaagcctcagaacgagcaggttcaaaagactcct  
ttaaggcatcttgggaacgaacgacagcataccaccggccaccaccatggcagccttgatgatgaccggtaacatgattctttgacaaaag  
gtttcggcatcctcaaagcgttcaaccggaccaggggtaccaggaacgacaggaacgccgaacgaattgcaatggctcgggcttggcttctatc  
acccaaactatctataatattggctggaggaccgacaaaagccataaccggcatcagtaacttttgagcaaatcagcgtttctgaaaggaaac  
cataaccagggtgaataaggttagcaccgtgccttgaatctataatctcaatggtaagtaagcacaaccggagtagtactgacca  
atttaccaattgggtatgattcatggcctttgacggtgcatcgacagccgatcctcatgagagtagatggcaactgtgtgattgacaattcat  
gagcggctcggaacactcggatcgcaattcagatcgggttgaacaaaacttgttatatttctaccttagcagagaagtagcgcctgtagttt

gctataaggattcgtatttggcttggcactgcaataaagttccagattggaaagccatctctctcaatgcctcaatttct  
ttctgcagaacgcggtttattcaaggcaagaagaacaatgatgggttgggttaaaggcagagttgctggctcccttgaatctgatgacaccatc  
ccgcttaagatgtgagtgatgatacactaagcgattatctactaaacaaagcctatttacaattccaccaatcatactgttaagaggccctatta  
taaccgcaatagccgcttacgtccaatacattatgaaatgataaactaaagaagataagttcaattttcgtacttcagctgttttattgtcca  
aagccttacttacgttatcttaccacttaattccgatcgatctggaaaataaataccgagattaaaagttattttcgaagccaaaacagcacgc  
aattttgtctatgcactcactatctgtaatctgatgcaaaaaaacgaaacaagttaaaggagcaggcaggtaatagttactgaagatcgaa  
cttagcaatattggtaggacagagaagtttcaaagcttattacataattatataatattagataaaagatagacgagaaatgaatagtgtaaat  
ttaaaccattaatacctttcgttcattttctagttactttttggaaatgtaaattcgtggattcgcattcagcgtcgaaacactgccgttatg  
atgtgccattgatcaaatgtatattttgtctcgaaagactttgggcttttaatgactgagattggtaaagaggagaaggattgaactgcggcc  
ttcttttattgattggacaaatcataagaagcatctaatccaaaagtctcacatcagaaaacgattccagagtgaacagaatttttcgggtgcaag  
gaacaaaatacttatcgacgatgtgagaagcaaccaaagtcggtgcttgagctccgatgtaaaccggtgacattataaggagaagaacgaac  
aagtgctggaactcacgggctttgcatcagcagttaaagattaagactctgcatgaaatggtacaattttcctgtttagttgattgtcggat  
ccatctccaagtcattgaaatgaatgaataagccccgatcaatactgggattcgacgtaaagtcgcttcaatcacagactcgaccaattga  
tagagagtatatgaaattcatctgttccatctcgaaacgtggcattaataattgcaaaaactgtcaaacctctgtaaagtgatggacgaag  
caacccttcaattgttcggggttaaccctcaaaaaattatgctttgaaatcctctgtataactggctgcttctgcaatccaccttacgtagta  
aatcaagatacaggagagtggtgagcctttggcaaacggatcgcaagacaaatactcatcccagtcagcttttagccaaaaactccataa  
atctggcttattagctgcttctgctatgcaagaatggtatcatgagcggtaatggtctcatgaaatcgaccacaacaacatccttcaaacct  
agaaagtgtccaattcatttaacaaatgataaagaaaaatattactcacaacaaaggattagttccttagatattaatgccttttaagggtaa  
ttgactctctgtagcaagttggtccaatctgagctatgtttagtaaggccattatataccgggtttagctatgcagatccaactagctgttga  
aacgccatccatatactcaagctcgtagatataagatattgattcaatcttataataatagccatagcctctggtctttatgaacataatgat  
aaacgatgattcagctcgtgaaatcaaaatttgacgaatatttatgctgtaaatctataatttgatataactcatacttaataagtaaaa  
ttaaattttcaaacattcgttctacaagctcatccttcaagtgaaggatccttctcgagaaggtggatcgcggtccttgggcaacaatttc  
ccaactaaactcagctttacatcgttttagactttccagcaaacactggatcagaagttcggcttgggtagtagggaagatagcaaacggaa  
gcaaaaaagtgagaatacactctgtactctcggtaaacgctccttcttctcactgtgaaaactagctacataatagctagaaaaacagaa  
ggattcgggtccaagcatcaataataactggtgcaaatggcgctgctgtagggaggagcggcaaggcgatacagggtaaaacttgcttga  
atgatctctgacaagcattcagcatttcgcggtgatgggaaagctcttgatagagttggaaaatagtagcaggggtttgctttagatc  
ttgctctgatttttgaacacgatctgcagcaatggggaaatataaggtagttgtgaggagtctatttagaggatagatcttctcatgaggag  
caggaggaccagaattttgtagatattgaattcgacgttgctgaagcggaccagattgggaataagcccgtgctaatttcaaaaatgatcgt  
gatcacctttattgatctctcgaccaactttatccattcccttaattccttgaatttctgctgctgtttgatgctgatgataggatgtttctctgat  
atttcagcgtaatctcgaaaataagtggaagaatattcgaggccaacgggtcccaaacgatcttaatagacaaagcaacgtctatatac  
ggaaaaactcgaaacgccgtaaagtggaaggcagaggtgaacgcaaggcagaccataatcaaaaaatcgtaaaaaccattgacaaaag  
gatgtctgtctagttacgagattggcaagcgaattttctctataatcaaatgctgggaaattttactttcttacgagcaaacgaaactgta  
gcctgtggttacgattaggtctctggcaaatctgtatctttacgagcattgggattgtccccttccgagaatggaaagccaaaccgtgttt  
ttatcaagtcgctgcttcaatacaggacgacgaaaggccatacagaactatggatgatggtttcaaacggccaataacgaaacactgcaa  
aataaattttcttggatttttaattcaataaatatgccacttttaattgactgtgacaacaataaaccaaacgaagtaagtgaaagtaaca  
gaagcgtttatgaacaggcaaaaataaaaaaaaggattagcaaaagttaattgtaaagaaagataacaatatctaaagcatgagtgagatt  
tcaattggattcgtccaaagtgaactttttagtagaagggttagagagcagcaacaaaatagcttatgtaattgtaattgtcagttca  
agagtcttcaaatagataaaaaagatctttcaagaaatttttagtaattgatacatttagagagcttgaacaatatcatgagaaatttcg  
gataatgtttattacgggaccggagcgtgtaaaaagaggtgcaaacactgagtttgaatggattaaaagctattaaaaggatattcgggtggc  
aaaattagacatgaaatgagctcctaagctcagatgaattttgggacccgcaaaaacaataaacccacgatgaatatagtattagcgacatc  
acaatcgttaagcatacctttgaaatgtatataagaatataataagcttaaaaggtagtaatatgattccattctgtagggaaacgttataaac  
ttggagtacaagcagaaaaatcaattataaaagttgtttcattgataattttacaaaagagtaggatttcttcaatatcagattcata  
tttgcgtctggagaacgtcagaatgattgtatattttacgctctcgagatctgatcatattacaagtttaatttctgaaccattccttata  
aaacaattaaaggcaagaaagtgatctagcaattttcgtcttactcagaaaacccctcctaccttgacttggctgcaaacactcatacaac  
aatttactttctgtacaagagaagcaagtttagactttataaaaaagaagaacaaatttacaacttaagatactttttacaaaaagaaaacc  
cgtaagaacttaattcttaattgtttttacatcctcgtttgtttatgcgacgattcgcataatagcgcgataattgcaactggaaggaacatc  
ggtttgaattgatatagatagccaataacatttaataacgatctctatatttctcgcacatatagcgaatgctattttctcggtaaaaag  
ccatggaatgtgtctcaataaacgcgctcattggttattgaaaacagtttttagttcgtatcaggggtttcatagcgcagaccttgcacca

caagagccggattcgtttgacctatggtttgcgtgactttttgtctctttggtgcttccgtaattgaccaattaatccgtgttatggaattatatt  
gatccccaataaacggccgttgcaactaacgccaatcatactttacaatctcacaacctccatagaagaggacgtcaagttttccacca  
accgcaggtaccgttgacgtcggaaaaacattcagcgtgatcttgctttccctggttcatgtcccctgcgttcttaaggggaaggtaaggt  
ttgttctgcgaaaaaatgaaaaacattgatgtaagttatggaattaagctgatttgaagagattgaaggattcttgtttcagtagctatttct  
tattaaatgtgatttttagcttatttctgcagccgttattgaatatgtaggtgagtcgcaacagatgcttccttggtccaatgtacgatagtcgggt  
gattgttacttaggagaaatcaagcgaagcgggcttagcgacgtaattgtccaccggcttccgttgaggctagtcaggtcatatggaaaatcg  
gacggttgacgaaccagggtatataaaaggccccggcacctacatatttcttaaggatcttttagtatcttacatagacatctttaatcatcat  
gggaattgaaaagctttcgtcgcgcaaatctacgactctcgttgtaacctaccgtcgaagtcgatctactaccgagactggcattaccgtgct  
attgtcccctccggtgctccactgggtttgggaagccctgaaatgctgacggtgataagtccaagtggggtggaagggtgtttgacgct  
gttgcaacgtcaacaacgttattgtcccgccttgtaaggccaaccttgatgctactgacaaaaggctgctgacgatttctcctcaagctcg  
acggtaccgagaacaagtccaagttgggtgctaaccctatctgggtgtttccatggctgtctgctgctgggtccgctcaaaagaagctcccc  
tctggaagtacattgctgaagtttggcaacaacggcccttaccctccccgttccctcttcaacgtcttgaacggtggtggtcacgctggtggt  
gaattggctttcaagaattcatgattctcccgttggtgctccctcttccgaggcatgctgtgggttccgagacctaccaagccctcaagtc  
catcgcaagaagcgttatggtccttccgcggtacgtcgggtgatgagggtggtattgctcctgacttgtactcctcaagaagctctgacct  
attgtcgaagccatcaagaacgtggctacgaaggtaagatcaagattgctcttgatgtcctcctccgaattctatgttgacggcaagtcagc  
gtcgacatcaaggctaagaacccccagccgagaacaagctcttccgagcaactaccagcatgtactctgacctttcaagaagtacccat  
catctcattgaggacccttcgaccaagatgactgggtgctggactcacatgaaggctgacctgacttcaaatggtcgggtgatgactgac  
tgtaccaacaccaagcgtctcgtaccgctattgagaagaaggtgtaacgcccctcttgaaggttaacaaaatcgggtaccgtctccgaatct  
ttgggtgccgcaagatgtctatgatgctggttgggtgctcatggtttctaccgttctggtgaaaccgctgatacttcatctcactgactgct  
ggtatctcctctggtcaaatcaagctggtgctccttgccgctctgagcgtttggccaagtacaacgaactcctccgtattgaggaagagctcgggtg  
gtgaaaaggccctctacgctggtgagaaggctaccaactacattaaggagtttctaaatgaaaatgtctaattgtattttccatattttgtttt  
taatagaatgcaatgaatcaatttttgcctttcggaaataatgttttttagtgattgaaatagttgttattaatagaacacggaagtaagtag  
tttacggcaaatgagtagttgaatggtaatgcacaagaactaaataataattattcaaatattattgagcaagctgttattgataataaatag  
aaaagataaaaagaagaacaataaacagcaaatctagattatactttacagacttctgtatagataaaaacacaacaaaaacgaagag  
atgtagaaaggaaatgatccatcaaaagggaatcaaaagcgttctacaggagatccgcttcaaatgaacagctctattttaaagaagag  
tttgacgaactggaggcgtcgcgctgtagaggagagacactgaccgagatcgagaagacgagaatcgagggtctagactcaataat  
ggacggggaagagatttccgaggagtagatgaagaaagagaagatggcttctgaattcgagaaatggagggttgcgatttggggatggaaga  
agcaaggagctgttaggcatgtcatttctgagatgtggaggaaggtttgggttctttcagaaagggtagcccagatcaagatcaataat  
ggaagctcaattctactcttctggttatttctgtatgtctatcgccgactttgggcagatctaacttgcaattgtttgtaactgagggtgctt  
cttcaaacaccgaaaggtaggcgcgagggaagaataatgtaacgtgaaggacttacagaacgttctgggcgaattttgtttggccagattga  
gaggttctgtggtccaacacttgccaagctgatcaagtcgatggatacatcttcaaccctagattactaagtggtatctggaagccgttgg  
ggcatgtattccaggtcatctgcctcgtcgttctggtgagaaggtatatgagaaaagtgatgatgggtggtatcctgccgtatctcattgagga  
acgttaagtttctcctcagcgtatgatttaaggaaggaggattagaggttcatgaacctggaatcgtctccagttggagaaggagctgca  
gagcgttaggagaatccatagaaacatccattggagaaggtttaaagagaggaggagcagaaggagcaaaagaaggtgtaagcttccact  
ccctcagaataaatgtcgaaatgtttgcttttccccctagaacggtccttggcgcgttctgcccgtggtgtgccattcgagtggtttgag  
gtcaaaaggagcatttttagactcttccaatccacgttcatgtttctgactaccggagtaccggaacagcgttttctttccatagagaacatggt  
tttgggtgtgtaatagaggctggcgcggtgatacttttagaaaacaggtgacgctgtttgtttatgttactcatgagagaaaaagaataaaaa  
ggaataaaaacagtttaggaagactattgaattaaatggacgttggaaatatactttggttttttagaagcaaaagcactctgtttgacaaaag  
tttgatgattgacatggccatagtcagagaactgggaagccatgttcgatttgaaggattcttctattaaaggattttaaactcactcatcttt  
aaacatgattctccttacaataggcaagcacaatttcttttagcagggtttgttgaaccgaaaaccgacttcagagtgacaacttggcctcagc  
aatcaagcgtcaaaagaatcacagaagcagcttaatttaataagccttagatattataggggaaaccttagcttccgataaagtctacgtatag  
atattgccccaatgtcaattgcagagtcgtgaagacgaacgttctatttcttttctttcatctttactgaaaaagctaggaaaggaggaa  
attcgacaccacaatttgcctcaggtggccatcatgtctattgactcgtccaccgtatgacacacttctcttcacgtccaccttaccctacc  
cgaaaaaactaatgtcgaaaaggcttttctggagtacctttcgtttattcttctggttaataaaaaaccagaataaagatttagatgat  
tgtctcacgaaggatgcttcgaggccgttatggtccaaagttgctggaacgttcttggcaacgtctgctggaaccgaaatggaggaccacagtc  
tctattaaagttttatggatacatttcatcagaattgaagaagaccaaggttccaggacagtatgaaggcactccaggatagttcaggga  
atttgggcgaaagcgtatcattcaagcgcgccgtgacgcttatgataagctcgtcaaggaacatctgccgctcacaacatgggaaaggc  
aggttccgctcttggatctggtgccataaagcttgggaaagtgctcctatcgctttctcgcgtaaagtcattgcccgttaccactaacacagtaaca

agcgggtggacaaagctactcagcctgttcgtaagaccgacctctacaaaaccgtcaaacagaccatgtcggacggcagtacctcatctcgata  
tgggttttacgccgataaggaacaacgtaaaaagcttcgtaagaggttgaaaaggagcgcataatgttggctgttctgtaagattcaacca  
acgatgacgttcaaagtgtagttgtgcatacaaatccttcatggaagaacaaagtggaccaaattacaagcgaatcgaatttatccgtaagctt  
caagaatataagaagaatctacgaggaaatccgagcatcccattatcttccattcgtgattggctgacagcatcagcggaaacctggctcgcgatg  
tttccgaaaccgaggcttctcaagtcagaccggttcaaggagatagatccttctttaaactcgcagcatttcttgagatttgcgtgagatgtc  
gttctgaagtcaccgaagcctatgtgaagggtgataaggatgtttgcgaacctgggtctcgaagctcattttccgtctatgaaaccactaca  
aggaatacgcgaacacgggattgtaagcgttggagaatcttgatcctggcgctgcacatcatgtctcaaagactacttcaaccagcaac  
atccccgtccttgcgttaccttccgacccaagaagccacatgttcaagaatgctctgagcggcgaattgggtgccgagcagaagatcgtatc  
cagcaatgcactacgtcgcgtgcttactcgtatcgaagaagataggaataaagaacacagaggctgggtatagttgacttggccgtgct  
cgtgctgcgactatttcaatttgaacgatttgcgaaaatgtttactttacagatcactttttcgaatactttgcatatgcttgatcctttata  
cataatctctgtttattcattttacccaaaaaccggttcaacgttgttccggataatacgttctactaatcaagctacagattatagga  
atgaatggcttgaacggtagctattccaaaattttgggtttttgtgtactctaccttaaattcgccattgggttatttttctgattgttta  
attccatgatgatgaatctggggaagcttttgcacttgcattcaaccagttgaggaaataaacgtacaaatagctatgaaagcaatagta  
gcctatagtcacactgcacccgaaatgaaaactctgaatgccgttgtttattcatctcaaaaaacagtataattacagagtcctttactaaa  
caaagcttggcattctgtgcagaagcctgtatatcaaacatcttgaagttgtagttcgtatgattccgttttgaaccttttgaacttccctt  
cattttgttaaaagttttccttttgtttacagtttctgacttgtttactgaataggatggatcccttgtgttacgggtgctataaacactcggtatgtt  
ccaggtagggtggcccaattttgtaactgactcaacaaacactatcaaaaacacggcgacttaagcatttaagcaagaatagtagtg  
gtaatgaagtagcaagtagctgtccaaggagcttgaagagaagcctcttgaaggaacgaagctcgtgaagaagaagaagaagcggg  
gaagaaggtgaagagggagccggcaagggtggagaagacaacgcttagtgcgtgataagaagaaaagaagaagaagctaaaaag  
aagaaaactcctcaagaacaaaccgatcccccaagagttggccttccaagatttctgtaacaagaagaccctgttggagaagttgtggacta  
tgcaagaagataaccttggcgtactaccaacgaagagaagcgtgcattagatcgtcaagaacacaatcactggaatgatttacccgtgctgctg  
aaactcatcgtcaagtcgcaacatgcacaatcggcgattcaaccaggcatgtctttaaaccaaattgcgaacttaattgaagatggcactcgt  
ctttggttgaagaagcggctaaactctggatcgggttccctaccggttgaactgaacatattgccgctatttccacctaatgccggtgac  
actacaatcctaaaggataaggatgttatgaaggtgacattggcgttcatgtcaatgggcacatcgtggactcgttctactatgcttggaaatc  
ctgaatgtatccccttggctgctgtaaggctgactaacactggatccgtgaagcaggtattgatgctcgtatgagcagattgggtgaagc  
tattcaagaacatggaaagttatgaagttgaataaatggcaagactttaccagtcagctcattcgaatttgcggtcacgacataaaac  
aatatagatccacggttcaagactgttccattgttaagggcgcggaagatgttaaatggaagaaggtgaagcttcccatcgaacttttg  
gctctactggctgctgttcttccagctgatttgaatgctctcattatgcgaagagtagatgctggccatattcctttacgtcttccctgcca  
aagcttgttaaacaccattaatcaaaacttggcactctccttctgccgcagatactggaccgttgggtgagctaaagtagcttggcattg  
aacaatttggttccgctgggtgttcaagattatcctccttctgctgcaagggtagtatactgctcaatagagcacacatcatccttcc  
cctaccaaaaagaagttgtctctagaggtgatgactatataaacgttccaacctaatgcttgcataaagcgttgaataatagaaaaaac  
tccgtattaccataataattcctaccttacccttagctgtttaaatttggtaatggtttataatattgttctaacctatgtagtgccatgca  
ggctgaaaagcactagaaggcatttgaaggttaggaaggaatgaaatcagcgttccatcgaatgatgatttccctctatcctaagacttga  
acgttcagctcacatgaagtagcttgttcaagattccattcaacagactgacgttggcaatattgtactgatgaggatagtaagacatgagta  
attgaatgtactcagttgtttctcgattgcattgcataataggtgtagagtagaacaatggagatgttctgctctttgcttagaggatac  
aactctttaaagcatgcacatacatatagatataattttagatagagaatctaccatgggcttggattgttgttttccaagagctgaaga  
atccttccattattcggcaattgtttttatggttactatgaaggttctactctacaacatattccattcgttcattcaggatttctgctcataaaa  
caattatcctgttattcatalcttctataacatctcattgattgggattcatcctgaacagagcacttgcctacagaataatggatttgaattat  
taagaatgggtctcattatacttatttctcatgaaagctcagtagcttccctggagctacaagattgtcagatttcaacctacatgtagc  
aggagtaaatgaatcaacaaaaaataattgcaatgtataaatttcaaaattttactattctttaccacaatttctgattgagtgagataaatt  
gttgcacaaataaatgcacctaattgttattatcttcaactcgcacaaaccatgttagccagaagattggccgcacggtaagtatag  
gaaattcaattcaaaatttttttaaacattactgacaaattataggtcaaccgttttccgatggaaaacgacttatgtgaattctcca  
taacatacaaggcttgcacgcaatgcacctttacctgatccgtatcattgagcctcctcgtgctacggttctgaggccgttctaatgatga  
tgcttgaattttgggatttgccttttattgggaattgattcaatgggtgtagccgggtgaaaatttgcgttattgatggatggctgatggaaa  
ggatgtagagcagttggagatgtcaaaggcttctttagtcttctgttggctcgttagtagtttaagttgttttctatacggcaaaaactaa  
agacaaaaagaatttctcctctataaccatttcattaatggctcatttccaattcctgtctcttattttgcttgaacagatctcagattat  
gtctccacccttcaatcgcattccaaacccagcgtcatgtcttactgcctgtacaaaatgaacctgggttcttctcgtcttctggattt  
tggctgccgtggcttcaactgactccttggctgttgtgctactgaagtcgaaaaatcttccgcgatgaccattgtaattcaggggtaagttctt

tcctctgttgggttttctgtttcccttaattctaacttcatggcagaaatgatgaagttgttgagcaagcaagacgccaattgaagatattgt  
ttcggtttgggctgtttggactatactggactgatattgtcgagcgtgaattacttttggccaaagtatccctcttgggccccgaccacttccaaca  
gcactttgaaagagatgcttctctgttgaagaggttgaagccgacttctccgttagtgataccatgagtgcaactgctgcttgaacttaga  
gcaaacagcttctgccatcaatcaagttactcagcttcaacggctgtgttccagacatctactgaaagtctataattgaattgactgatgg  
ccctgatcgtattgataacttctgtcttacttctgtccttccgggtgtgttgaagccagtcgtacaggtaccactgccatggcagcctcctctttcc  
aacgccataccagagaaagtagaagaagataaggtaagtaaccttttagtatgcaaatttccctaactttacattaggataacgatgatg  
tttctgacttgcctccaggctaacaatgaatatgctctgtaggggtaaccatttcttttgacttcttcttttaattcttttactgttccata  
ttatgaagcagattagtttgaattgtgtcctataactctatggtggtgtacatatattttggctcaciaaattttacgacaatatcaagttt  
gttttgaacctgaaaatgtttccatagaataggaaataattgtgataagcggcttagaactgtatgtttgtatttaataatgataaaatgtaa  
ctgattatataatgaaagccaaccacttagaggaaggggtcatgctttagttgtctttatgctatcttctgtgattgaattatgcttagct  
aaagattatattagaattaaactgtatgtttgatagcctccttctgtatggcgttcagtaagagctatagctcaagttagatccagggcg  
ccactgttggcctcaaacgagagattgtcagacatggaaccattgggatgttgaactctgcagcgtcttgaataatctcggcgtactt  
tatcaagttttgcgaatgagaggccagttgtaaggatcaccgaattcagcaaaagtaacaaaaaattgtacgttgggctagtgtgattctggaa  
gcccataagagctgtagtactgaatagccttatagacttctgctgactgtgagtagacagagaaaccaaggattgccaatggaggaactaacg  
ccgtcatatacatcctctaggttagcggccgatgagctgcttgtcttattgataagcctgtgctatcagcttctggagcttctcaacgtt  
gggagcgtatgtgtcgaactttagagtaaaagagaagccagcaaacagagcaatcaagtcggaaacgggttaggaatattttataacctct  
gatgattccctttctgtgtcccaaaactaccaagcttaagatcgataggatggattgtttcagcataaagagtgattgatccaagctccaac  
acgtttcgaagggctgctcctcttgcgaagctgtttttggagcgtcaatgtgaaatagtgaaacttcttcccaaggtcaaacccag  
gttgcgccaaataccacagataataccaatctgccaagagtgctcaatataaggaacgacttcatgtgctttagtaccatgatcaaacgat  
agtttaggtacttataaaggccatagctctcaaggcaggagagctattttgaggagctcccagcttctcgtcgaagcttgaccatcggtatgaa  
acttgggctctcctaaacctcactgtaaaagtaccgctaggggtgtgtaccttctgtaatcggaccatctcatcatgtactttacgatgatcga  
tcaaggccatggtcgcctcagggaaacgatcgataacggctcatcatggaagagcactatcccgaaccattggaataatagtttgaacggtt  
attcgtatggagaagcaataatacaaccagcatttaccatttttagcatatctaccactgtctccaactgtcaagtaaatgactcatcgcaattcctt  
tttggagttcagcccaatgatccacatcatgtttttagttcgtctttcagcaattgatattccgtgtaatgaaacagagctaacgacaaaggcgag  
gagcaaacgaatgcatactttagtttcttttttagatatacggatcgataaacaatacagaagatggataactatgatactttataaatat  
atactgttaaaaggtatttttggacagctgtcttcttatgcatgttgaattgcccataaacaataacttcaaaacaacagacaccgcatg  
ccctatgcaaacgcagatgaaaaaccattaagattaagatatgtaacaaaccaagtaagtaataataaaacttttagcttagctccatta  
ctaaagccacaattgaaacttcttccaaagacgatagcgtaatagacattgtttacagcgtactcggtaggaaggattcttgacatgtagac  
accgatgctattatgaaaaatagtaaaaggtgcttctgatgtaacagaacctgagcaccttcttccgagggggaggatattgggtagacga  
attgaactattctgaagccaatggatagttttcttctctctctattccttttccaacttctccctcaacctttttacgcttcttctggcct  
atgtataacctcaatgtttggttacatgttcaacaatacaaaaatgagagtttcaggaagtaagcttccaatgtaagtaactaataa  
tagggcttcaaacgagtagtgaaattcttcaatcgaatttgaagcactcaaatcattgtttactttcattagagaaatcaaacctgatag  
cgtttgatatttactgttttcgctcaaaccaataacttaccatgcaacaataactttgcgctgagctgttttctcctcgtcctttctttgttaca  
ttgttcatgggttaccgcagctttaaagccttcaatcatatttactgtattcctttgggaatcgtattccaactattgacttcatatcccgaaggaa  
tagaactgtactaactcatcagtagactgtagtctgtgtgaattacggaaatgtcgagctttagcttcttagccttccaaaccttctat  
gaccatgtctttaatagagaacgcaatggtaaatgacaagaaactccttagaggaaagaaaactaacgtgtaattatagaatttgaactac  
aacagccacgaaccaagtagaagtataaacaacaaggcaacgaatgggttctcaacaaaacttcagcgatcacgagaaaatcgtcacatg  
cgttactggtctcctgttaccacccaatcgaatgctctcaggatcgaatcgtatgtgatgaaaagcaacgtgatggaagttggaagca  
aactctgtccttctcggtaaacctgctcgtacgtttgtcggctcctcgaagggagacaagtttccgtaggaagtgggtcctcgggtcattt  
cagtgctattttgaagaagaaacgactgggtgggtcagtaaacatcaaacgctccttgagaagcaccattctgtctttggattggcatcca  
acaacgttttcttctgctgctggtgtgccgatcgcaaggtgatgtgttgcagatacattcgtgatgttgatgaaaagcctgaagctactgtctgg  
ggatcccgtcttccctcaataaccgtttgtcggagatccttctggcgggttgatccattcagttcaattctctcctcaggaaatgctttggcttta  
caagccacgatttcccttactatcgcatatccaagcggcctgaacaacccctcgtgcttttctactctaaattacctcagctgccctttcatt  
ctctctgtgggtgaacgaaaccacatcgttctgctgaggtataactatgcaccttctttccaaggaacgaatcgggttgattttattggg  
gatttagactcctgggtcttcaaaaaccaggctactcagaccggaaggtatccgtaaaagatgaagaggagtgtgtccgtctccttttctgct  
ttcgttctactttccgaaataggtatggaagggtcagccaatctgttcttcttactactgtacacaaaatagattgcttctctcgtcct  
acgctggtgcaccaggaacatgacttctcactcagcgtactgatggttgcacgttttatggaatcttaattgtccagttatgacttatga  
tcttttctcgggtcctttcttttctcgggtattgtataaatattcatggcttatcaatatctaaagtttagtaagaacaatactttatgaataag

cgcttactctatctatgtcaccgtgatctcgacatatacgttatatcttcaagctaattgtttgatttaagaatgcttcaattgatactttggatcc  
attatcttgaaaataaactaaagatgaacaaatcattaacgtacgaaagatatctataaataaacttaacatcaacaaaaccttttg  
cattcagggttgcaatgaaaccgtattcatcttctctgtatattccgattttatgcgagctgtaccgtttgtcaaaaaaccgtttta  
ggtgccaatactaccacagcagtaatgatgtccattcaggaactaatagattgacaaatcgggtcattcgaccttgaattctttgttagatctca  
aacgaacgattgaaagagcatctagtgaattcataacatcgaaaattccgagctgtcaacggatgaatcaactgtctcttagacagagagaa  
ctatattctcatagacatcagtgatacttaagacgacttactacacgaccagcgtgcataaaatagcctttgtgtaagacttagatcttta  
aacgagagctggcagactgacttagggcagaagtagcacgaactacatgagcaatgggtggctttcggcaagacatctgttgacataaacctc  
taatccacgagatctttgttcgcttccactaattcaatggcatgtctgcaaatatccaacgcttttcgcaagtcaccgcttgaggctgcaactttcg  
agcgcgaaagttaatagcagatggatgaataaatggaactctgctggaaacctgtcatgaaaagaaggtgagctatctttctctcaagt  
gtgttcgagatgatctccagttttctgttgactaaggcgcaaccaacctgctttataactggaatctcttgagctgaataggagtgaa  
cgaagcaatgtgggattatgtttgtttgtaaacgaggaaggaaccgatctgcatatctagtgcattcgcaatccgactaggatgagccg  
ggacatgggaagagaaggcattcgaatagcgtgtacagaacctgctgttcacgagcaataagatggtcattcatcaaaacgagaataatt  
ggaggagcagaggaaggtgatctttggtgaagtaactctttaaattgagattgataagtagaatgggaatcctctcatcgagagtgattgttat  
caaaaagttgattgtaaacctttcgaaaatcatcctgggttctgtgatggtcacaatttacagtgacagtcgagcattttgaaactttttgta  
ataccttgcaacacttattcaccaaaacagtttaccagtaccgggctcaccactaatgtaaagagcagcgcggatggctcatccgtcaaatg  
ttgataaaaaacgattccaaaaactgcatttctttcacgactacaacagggcagaacgataggatttacgagacatgactttactggatt  
gtatgctgaaggagtagacgggtgtgagggagtgagggaactattgtctatgaggagtagcttgcaaaagacgactagtaaatgggttcgact  
tattcacacgattcaaagacctaggagtcacgagctgaattgtctgtcttgggttacgaggtgtccgaggtgtctcgggtggaaggaagttta  
agaagtctggagggtatcttcttagagctgatacttcttcttcttactccttttggtgttaggtgcacatcttacttttcgatggtgtaaac  
ttccaagaacggtaaatggactctcttctacggggtgtagaggaacttctacagcaaggaagtattatgagtttcattttgcaatcatataa  
agcttctttgattgaattcgattgcttccgactaggcgcaaacatcttctgtgagttcattaaaattggttctggattcatgcttgaataa  
ttctcaacaatcttaggaatccgtagagacaatctttgtttcaagaagaggtttgttatctgaaggacgtgtatcttaataagagaaca  
cgacgctgcgctttttcattttcatggttctgtcgcgtgctgcgtgtaaatgtaatatgtgagacgcgatgtgacgtgacgtgacgcgacga  
ggtaagcgcgcccgaactactttctatagttgtttacagacaaactaaaacttaaaactaaaataaacaataacatcatt  
ataaaaaaggttttaattcgtatattctataatgtcaggtactacttgaactgtattttgaaccgaaaacctcaaaaaactaaagatatactg  
cgtaggaaaggctatcaaacataattagaacaattacgctgcataaacatggatcaatcatatcgaccttacctcaagttaaattcatatat  
ccatctgaaacaaggcatgaaacatctttcatatgtatgaagcgcctgctccagaacactcgaagatattacattccaaaacctttctat  
ttccctttgatgaattccagatatgtattgctgctcaactgacgctcacgctcgtgttcgaattgaccttattgtcctttgagaagagcttctcc  
atctccgcaattccaagcatttttaaaaacttgacttctctgattacctcagataactttgatgcaagcaatagtccttgtttccatcatcgga  
ctttctttgagcattggctgctgctaccttttgggagaacttcttctcagcagcttctaaaagtatatcagcataagaaccaagatgttgagc  
ttacgtgtgaatttcttattgttcttcttattgttatctctgcttcttttctgctctatttctgctagcattgtcgaacgtataaagcgaagggt  
ttcatacatgagcttttactttatgtttgagctttttatattgcttcaattcatctttgcctaacgatatcgattagtaaaatttctcaaaagtagg  
aacgtactcaaagtctttttctcagactttaatttccggaaatcagaaacgctgttgcctcaaatggagctttctttcttttggagacttttg  
aagatcccatggttaaggaaagtaatgggttaggtatctgatatagaaaaaaaattccttaagacaagaaatgtggagcacgaatagacgta  
atgtgaaaggaataatacaaaaaagacacttcgatcagccgtcggcttttttggcatgattgaactatgtgggaatagtgaaactcctcata  
ttttcaactagcaccagatccaaagatatactcatttaagactcaccattttgtttttatggaaagatccttactgtcgaacactcagacggta  
gtgtaccatccactggttgtctgtggaatgactctcattgccgaattcctctttagtttagtatcctcctgttcttttagatattcagatttcttctc  
tttgcttctttgttttctgtaattcgatcgcaatgactgatcactgtttcgaataacatgtccaaagtgtcaacgattttgaaatga  
taatcaactctgtgaaaggaggaatccaagtgtcttcgcaaaagattaacagtacgatcttagctattacctgacgaacctctgatccaaa  
ggattgacagatcagggtgacgctgttctgctgaattatggtggcatggacctatgctcttcttcttatttctctatatttcttatttttg  
tatagcacttttctgtgtccactatgtgttgaatcgaataggtcttagttagtaccgctaccatcgaacacagactacgatcccatagacg  
gattctttaccaatgtatttaaaagtcttgcctgaatattcttccgctgctgttgtagcttctacttccactggaactcctcaagcctgcattt  
atgattacagtgttcaactcagtcattctgaaacataaacggtaggaaggagaagttcgggtcatcagaaggaataaaaactcaaaa  
aacgtagagtctgtctgtaatacaattcgacatgaatgagcattctgcaatgactgattgggaaccgttaaagcagctcttgacctcaaat  
tcagctgtgattgacgttgggtcatttcttctatagcaagaaaaacaatgcaaggcaatgaaatgccgattctggtacttcttctcagca  
tgaggaaagctaggaacaatcgcgatcaattcttttctgaaactacctgaaactctcctcacaactcatttctaaaactttgagttactt  
gttactgagaaagagctatattcaaggaaaccttgaatcctctctagatgttgcacgaatgataccctttcatgctcttctgacatgggaatt  
cgaatgattttcttttaaaatagtaacaaatagcttattggagaattctattgtttcttctctgcatcaagcgcgtcagagtaagaatcggcgat

tcattaccataagcccaaacggtgtatgaaacaccttttattaatacgaactttttatacatatcttttctatttaccttaaaaacttacatctta  
acgatgctccttctcctttgttcgtagtctataccaacaaacctgatctctacagaaaacgaccaatgtcggaatggctctcagagctctaa  
agaaaactggcataccccatgctcccagtgaaaggaaatgttttaaactcctcttggaatcagcagaatgttacggctcgaaggtgaag  
ttggacataacaagatcccaaatgttgacacaagacgaagcaatggacgccaatgctcattataaatggctttactctgaaactcttcaa  
gaaaattccattgtctagtacctctaaagtattgacgacaattgacaagaaggaggctcgacaaatacttgattaagtcaacaccgggaag  
attgaagacactaggaatgagaggtactgaattgagggctctgttaattcataagttagggtttctaatccgtaattgaacagtttctaaaaa  
catggaagctcagcaacgctactggggaaagtgcgagcgtctgtttgaaattgaaccgaagcaagaagtttatcagcaaattaagagttctg  
tgggtcaggaaaaagccaaatccgctttataagcttgctgactgctgatggttccggctgtgttttagttttccttaaaaaaacctttacgtt  
ctatttctcaaagactaactgcaactcccagatgatccataaaataccctgcaactaggttttgagcctcaactttcttttcataatcttctg  
cccttttttaaacgacagcgtttcataggaattccttaaaactataactttctctttatttctttttttttttttttttttttttttttttt  
cttctcctgtcctcgtttgtcaatatgagatcgccataaaaaaaacttcgacagcagctgagggcgtggtacgggtgctctgctgttt  
aattcagccaacgaatattgaattttctacatgatagtgatcgagaatccgcaattctggtaggtatcgtctctattgctcgaactctttatgtt  
aaactatgctcaactacaagcaactggacatactggataaagtctgatccaatgtaatcctctatagctgatacttttaaaactgcaggttga  
atttctaccctttcattttgtttattgctttcaagatacactatttagcgaatatttagatagctcgatattggactaaaagttaggtagagtg  
cactaagtaaattgacgacaagtattctatttaagaatatttcttatagtgcttttaacaatcgttatgattgataagaatggtagctact  
tttgatactataataccgtgtttactgcagctcataaattggcaaaactgaaagtttctggttgaccctcttgaattcttacctgcttcca  
agagaagcgtaggtcatcacattggcgttttagagccactttcaagcttgattcccttttactttgttttgcggtagcaaaattacctagcttttt  
ttccggctaaaaacgacaacggctcctcatatagcaaaaatgtcagaatcaattcttttagatgagatttctactgtaactctgttgacaagc  
aaaaatcaaaagaggaattcttagcttctgaaacgcttcaataggcttatagtttctgaactactggcagctcgcgcaaaatgatagg  
ccttactctgatcaactctcagctttaccattggaacaagatgctacatttagtttgcagttagctagtaatctgaatagcaagagtgaaag  
acgccgctgactatcatgtacggcaaggtataccgggtgaagaagcaaggacgataaaatgaagtgaaggtttgtctatctttaaattg  
atattaacaaattagctctgtattatcagctttggcggccttctcatgtctattgaaggctctcatcgtaaactgtatcgtttatctttagagcatgtt  
tatttacttttgagaaggtagaattgagtggtgtataatctgtcaaaaataaataattttggatgggttaatttatgccttaacttacgtacga  
atttggatttctatgaatgtctttatgctcaataattatcaaacgtttccataaaaaggcttataaatatttaggaagcttaggaataattggc  
agtctcttttttagcaaacaggtagtaggcaggtgatactgaaacaatcgtgtgtgttcttcccgttagcaggataactcagtttaa  
gttgatacatcaattacttctacgatcaacattttacatcaatagcaataaaagccattcaatgaactcgtgtgctgtttcgattcttagcgttaa  
ccttctggcgaatattgtttgtatgtgaaatctcataaattcattaaataatcgtgaagatctatcattaagaaggaatgactttccgcgtt  
tcaaagcatcaaacgtctctttaaactcttgaaagatcatagatccatgataacccaattgacgagccttggtcatggacgcaaccacattgt  
aagttcttctacaaaagtcacagaagcccatgtccagcatcaaaagattaggatccaagttctcgcgttcggcaattgtttccatgcctt  
ctttactttgtctgtgacccattgggaagggaatattggttagtagctcactattggagacgtttgttaggcccaattcctctgtgtgacttg  
ataggaggaggttaggcaagtcattttgtgctcaagaagaccagttataaattgatttttaggaacctctacaccaaagtattgagcaatc  
ttggccaagtcttgaccagctatggatgtctccgttaacaatattgaaacgttattgctggctcgggtttctgagcagccaaactggaatc  
agcgaatcaaacgagagtaggaaatgtcatcaaacctttataaaaagttcgtttccagggaaatagaatggcttttcagttctttgcagatgag  
tgacatacagagaatcgtgaacgcatggttcatgtagcttcttggagaagcaccacagatgctattaggcatggcaattacatagctccatgactt  
tttagcattatttctgaagaatgtcttctggagctagtaaaattgggagcacctgaaaagctttcaggcacacggccatccgattcttccatg  
ggaagtctgacagcaccgaattgaaggccataatactcaggccagctgttaaaaacttcttcaacgacttactgtgctcagatcaagacca  
agcacaagttttcagcatggctcattggtcttgacatttactttcatccgactcctcttataggctgcatggaaggcatatgtaattttgta  
actccctcttcaagaaggtttccgaacctgttcaggagtcgaatgaattaaatcaattgaatagtgcttaactttactaggaattgttctttcag  
cctacgagagacgcaatgaatctttgtcatttgggttcttcaagagtcgattaatgatggcaacaccattaatgccagttgctcctgtgacaatt  
gcttcaaatgttctgtcatttctgtcttagcttgaatagagtggaacattgggattttataacttttcaactcctctgagagtaatgatata  
actatgtttgttgtaagagaaaactcgaacgacaacattgctcgtctagaacctgattttcagtcagtggttctatagccacttactcgac  
gttctaccgaaattcaaatgacacaggttttacgcaacctttacatcaaaaggacggtttaccataaaaaaaatagcttagttgtgaaaagta  
atcgaaattccatagaaaagtaacgaatagattagctttgacttggaaagaacatactgactttctcagatgagtgaaaacctagtgcaaat  
gaataggctatgatggagccagctttgttagaagaatgagaaaaaaggcgcaaaacaaaataaagtaatgaaaaaaaactcagagag  
gaaccttattttgcaattgacgaaagccttcaatcgaactcaggtaacagtaaacaaatcaaggaacattctggtaacgattaggcaacaa  
atatcattccaaaacatttgggtgaaaatagtagaataaaccaataaaatgatacggattgattcgttttaagccagcaagattgggtatgca  
ttttaaataagcctctcaatagcttaacaagcttgctcaaaaacctggatattccgctagaaacggaggtgtactaagaatagcaagctcgc  
ttgataggcattgatttctttcaagaacaaaggatttcttggatttggcaactctttctttcttgatcgtctatacaaaagtttagtatta

tttactgaataaaaaatattcacgtaatcatgaacgtagaatgcactaagcttttagcgtgcacgcttcattatgagaaacggttaacaaagca  
ggcttggatgcttaaatagtaaacactgaaaaattcattttaccccaaacgtaacaaacgcgaaactttggtttttaagtttggcttctg  
ttttcgattccaagcatctttatctatgaaaatactttaaagacgaaatttagaaaagaagagctacaaaattaggatctgtccgtttccctat  
ataagctgtcaaaagatcgagttgtgtgtatactagcttgtatggattttgttctcgttacaaaaccccgtaggaggaaaaaaggaacggtgg  
gaagggtaaaaatgtctcaaaaagaatgcggacattgacaaagagttatggctcaggaagctcttgaaaaaaatggcaaaaaacgaag  
atcgatttcacgtggaaagatatttaaaaaaatacagatctttacttgaccacaagctctccagtttaaccattgtctgagcttggtttaggtcga  
cttcatacggttacggcttcttgcaattacaactattctttgagcttcaaagatttttaaaattccttctcgaactgtctttttatgatcctgcttct  
ttagaagacgacatccagtttctacaaaacaaaggctttaccatattaagagattcccaagctagaatgtctgaaaatactctgctgtacatg  
cctcattgcccacttctttatacgaacaatgggttagatgtttactcgaggctgaaaaacaattttccatgtgtgtaataatctacaactgtatgtg  
gacaatctgccatctaaagacatcaaatcaaaatacccaaacatctatagagatgcccagaaaaactatatacccaattttatttctgtaattc  
tccgaggcattgcctttaaagattatctttccattttccttaccctcagtcggatgagcatcgaagaagactttgctgagaagacaccgctc  
aactgttgctgatcttcaaactgtgagcaccacaatacaaaaatcatgaaaaatattcgcactgaaatggcttctgcttgggtttgaaatcc  
agtttgtaaaagttgacatgtatacgttgaaagcctcgtcaattcaactttgtcagcaagtaatcgtaggaatgttgagatatactggatccagt  
cgctcctaaattagctttttactacacaattgggtggaccttttcagtgcttcaatcacatccttggctcagggagctctttgtccaacgtaactg  
ttaaggcggttacgaaaaacagcaattcccttttctcaacactttgtgtgtgtctttgtaaccatttctagcataggaagaaggaattcgaatcc  
caaccactgtgaggtgtgcttgaatagttgtcaatcaagtcaatcaccttgacttgaactgaacaatctgcaattttgttcttctcctctccttt  
tcttttctgttagatgccttcttctgttcacggaaaactctgctagttgtcatcaaagcaagcatttgttcatcgttcattagttcttctcaga  
actttcatcatccttagctttagcatctgcatcttaataccttatccaatttacgttcaagttcttcatcatcagaacctgggttagagaccattcc  
cagtcgctcccctcagcttcatcgtttctatcttgaatccatcctcgtccatcattccttccacttcttcttcttcttcttcttcttcttctc  
gccttccccggcgaacattccatcttttcttttgattttctttgtagtaacacatcacaataagacgtatgctgccaggttcatgctctgtgag  
aatgaggtaaaaagcatatccacaagtctccaagtagatgagaaggacgagacaaaagagacagcatgacttctgtaaaatttccatagaa  
gtaggttcccagcagacgtttctgttttagacttttactgaaaacctgtagtagcagttgtctagatccttaaaacctcaattgagctgtgtca  
cctgcgtaaacctgtagaagtactaatgagtaaaagtaattgaaaagcctgtaattgttgaagtgtcgtctgcttgttgaatttttggtaacttt  
gtggagcagataaaagacttatctaaaactcattcacagattcatccattgaaacaatcaaagccatcttttatccttagcgtggtaagcaaaa  
ctgttcaatgctgtaaacggccagttcttttattgagatcaccgtcttctgagacacttgcgaaagcactatagctcaagtagcttaagctgacat  
taatcgcaagcgaacaatgttttagtagtttctgagattttgggactagcttattttccggaatttcaaaaataaccataagtgataaaaatattg  
agaagctcactaaccaactgctatgctttacagatcgattgctgcgagaatattcagcatggtatcagttaccactgacgttcttctccacag  
ccttggatcagatgccatgtcttttaggacaacgcttgataaatcccaaaagcaagtcgaatagagaaaggatccccttctgtggcaagagga  
aggatattgctctaccagtttagtattggaaggcagatcaaaggttagagagccacgttctccaaaaggtaacagcaattgggtatactagggt  
agcgtcattttgcaaacttctcaattttgaaacaacgcgttgcgccccgtaaaagatagcgccttcatcactaaatgggtgatgaaacag  
tgataaaaattttagaaaacaaagtaccactgtagacttagcatagctaaagctaattcaataattgaaagccccagaatttgcgctcc  
aatgaagaagtgaagcaaaagacgccttcatcaccacaacgttcaaaaatttcaaatggagcaagctgttctgctgaattagtttgtactcg  
ttgaataagaagcgcagacatagggagctttgtttccaagcgtatgttgaccaccatttctgcaacttccacttgccttaagactttcgaag  
agtcaaaagattggattatgcaaggataaaacaggggtcccagccagacattgacgttaggatgactcttgatgtctccggtatagagataagc  
aaaggtataagcccacacttgcgaagattttgagacggcgttgtttgtaaaagcttgaataacgtcgaagcctcagaagcatagggtaat  
gctggaatctgctttaccaagtcatataaaaaggaagcaaggttccgaagccagcttttcttctcagacaactgtaaaagtaaatccaccatt  
ctctgaaagtcatccttggaaaggactgacgttggagaacgcaggaaaaagagatagttgcaaaccaaacagcaagccaaaataataatcg  
cgttcttctgtcccttcaaatccagtgacagtattgtccttacaagcagctcacaactgttgagcagtaatttcttcttcttctgctgtaatgatc  
aaatattgattagtgctatttttttcaaaaattgaattcattacctcagtaagagcaaccgaaaacctaaacgagcgttctcgcgaccacta  
gaaacaccttggtaaatcgattcaatgcatattttaattctcctcgtagctatagaatcgatcaattccttgcagcttttagtctagattttttc  
atttgaactaatgttgaataaactctaattgtgtttgtcgccattttgacgattttactcacaatagaggtagtggtaaaaaagtgctagtcg  
aaagtttccaaaaaagggttcatgacatcgcaaatttttcttaaccgattttataagactcttacgttctgttcttttattctctgcttctc  
ggctgaagagtgcttctgctgttttttttttttttgaaaaccatttaaagcatagcagtcgcaaaaaggtaaaccttggtagcagctttttat  
ttacttttacctatctatcctatacgaaaaatgaaatataaggctcagaataggattcgattcttattcacaatgcaatcctcgtatgtttactt  
attgactgaactactgtattcatattgttcatactttcaagagatggattcctttcttttttttttttttttttttttttttttttttttttttt  
gttacgaatcatccaatagagaatcaagtcttcatagttcgttagtgcccttctcggttttaagaggaagcgataacgaattcttttaccgaaa  
cgtgtacagtgaatatacgaggtgtacaagattgagcactgccaagagctgcatcaaaaactgatttctataaggccttttcatctcatatc  
aaacgaaaacgacggctgtttacaaaatgtcaatcctcgaaaaagaatatttggaaactatgaagcttttatgttcgtaacaccgacgaatg



tagcaagccccaaagtactttgatccctcttcttatgtttgctagacaagaaggattctcattgttttcaaaacaatttacttcatattataaatt  
aaaagaaaagagttacccttaactgccttcatgccttgaattgttaactttctaacgatctgtatagcgatatcatctaaacttgatgata  
aaacaaaaaatgaaaggatccgctgacaagagtaagccttgagaaattcgagttatcttattcctaataatattgtttaaaaaatgaaatgaaact  
gtaaataccagttgcaaatttccgtcttcttctgcaactataggacgaaaagcaaaaggaatacccaacttacaactgacaaaccttcaagtaga  
gataatagcattgaaatagacttcacaaggaagccttgactattccaattgcatactcttgcctcatttgagtctctagttttccctattcattccc  
aaacaaacgcagaatattatagaaagaaaatacgcagaaaaaacgtttctagaaaagttactatttttttatctgatttacttattcgc  
aaactttgtggtcagaacataaaaaaccacctttagacagagaagcaaaagcaccattgttcatgaaatatgaagattcaagatctgaaatttc  
ttattcaaactcttatttaaaatcactctttaagcaacatttgagaatttaaatgaccgctttacctaacttactgcacgtaacgtacggtcctct  
tgcctttaaccaagatccattgaaaaactcatattggtattctgtaccgcttttaggagagatgggaaattgtgatgacaaaaaaagcaaa  
gatggtattacttcaacaagtagcgtcaatgaatgggattgctaattgtatgtataggggaggtcagatcctatttagtttctgtaattgcaactg  
gaaagtttaattcgtatttgcacattaattctgccttctccttacgaatttggtctatgaaacatccagaaagtatacaattgaatcattttctat  
gacaaggagatttaactgacttttgcttagaattacctgcggttcttcccagtttatggaaaacaatgaagtgagtcaaatgactacagcaag  
agataccgtcatttatgccaactccatggatgatttggagaacattttgtgcaacccagatggctacctgcttgcgcacagcgtatctac  
aaggccaagatcaggaaagtatacaagttagcgtataagccactgtacttttatccatgggctgcttatgaattccgagatttgggttgca  
acatcaagaaagaggactctattcccttgcgctcgttgagcaaggctacgacgtatggctaggaaacctccgagggaaacaaatagcaagaa  
aaatgtcaaatatggttctgaaaaccgggagtttgggatttactctggacagcatagcgtatctcgatatactgcaactgtcaggtatatactt  
tctgtgaacaaatccgattcagtcgggattgtgggtttctcagggctcatcatggcgttctgctgattgtccatcgacacagaactctgtaaatc  
tgtccggactttcatcgcaacttccctgctatttttcaaagaaatacagcagtaaaacggtaattcaattattcactctaatagccagctattat  
atgtgatgttggtagcaaaactcgatgcttcatctactattttctggcaggcagtcctgtatcctccggtgttttctaaaattgtggataccttttacgt  
tattttatgaattggagtggaacaaatctctgaagaacaaaaaatcgtaggctattcacatttatattcttatactcagtaaatgcttggtaga  
ttgggcccacaaatgaaaaataaagtctacaatgtatgatgacagtcctggattataaaccaagctattatacaaaattgaaatcggattgctc  
gtatcctattgaaaacatccggttccattatcttgatttatggtagcgtatgataatttggatgaatattgatgctttaaactagcttctccatt  
gtctcagtgcttcaggtaagtttcatgttctgggtgcttttttaaccaattcttagatccctcactatgaacacttggatgtaatacggcgata  
aaagaaaggacatagtcataatcaggtagctgagcaattaaatcatatagcagcaggaattatgttgagactataaagaggaatttgggctc  
gcatctgatataattgacggttggatgacttcttcatgagcaaggagtttgaacttattgatgtgatgtattcattattatgtttattgctcgtg  
atactgttttctcacgtaatgtcttttattttgatcattgtatttttaaaagtaatacactgttttctcgatattttactcgttacgaaatta  
ctgagctatatcggggtaaattagagttcgaattgaaatcatacaaaaaagatatgctaaattaagagaggaggttttaaggcaaggcatat  
tcaatttgatgtagctgccgttggtaacgttagatgttccagccgtatcacgcttcaaagatcaccgttagaaagatctactaatctaaaaatg  
cgcttccctgtttagtctcatccaccgcaaccaagcgtcattttgtaaagagccgtcgcagctcccttgattttatgtgaccgaagaattgtt  
cttggcagcaatttctcaaagaggccaacgaagtgtcttggcagcttctcagcagtaaaaatgatcctcaggtatactttccataaagga  
gttgcctcgtattggattggaagatcttcatggctattgaattggagtcggcttggcttattgcaagcattcaccattttccattacattggcgtaa  
ctggatagcacaggagcgtttgactttgacgctcctcaacagatttctaactttaagatagcctcaactcttggggacacgttttgattttcga  
gcaagcacatcaatactgacacctttgagatactcatcactaatttgcattcgtgccaatgagaagtaggacgcgaggtcgaaaagttggatt  
taatgggaaggggtgatcccgttgggtccaatccaaaccagatccgttaaaagacttggcttcttacctcaggagattgaagcattgctga  
aacgtgacccttcttattcatctcagaggtttttggtaatgaattcaggtttgcttttggatcatcacgatttgacaggaataatacttatcagttt  
gtctttctgagtttccggattccgtcttccaggagatgcctaaacaagctacttttgtgctaaaaaacaataattagcttcaaatgagttcctt  
tatagttcgaatcttaagagcattttactgacttgcgaacccatccaaaagaagttgtgcacaagcgaactaagttgggtggaaggttg  
gacatccaaaatgactgatgaagacaatatcgactatgaatgatacaaaacttaattaatttttttggtaataaagttatcaagctgtaa  
aaaagcagtaaaacttctgattttggatcttacaagaacgaaaagaagtttaacaaccgatacaaaaacgttgcattctcattataaaagtgtt  
atataaagaagtttaaaagaaaaatggtatcttaagaagaagcggaacccaaacgatcgtcattcataaaattttttagccatacatagagtg  
ccgtcttcttgaataaataagtcattgcaatcataaagtaattcatggaagaacattgatttgatataccatcaataactccgtcgtagttcctt  
gccaaccttatttctgaagccgtaaacatgaatctacatgatggatcaacatgcaaaccactcaagccctccgtgatcccaggaacaatc  
aaaaatcaattccagatttgccttgaagatcatacaagcgaacattgtcaaaagaagcaattaccaaatgtcgaccattaatcatgggacaaac  
attcgagacaggtcctgaatcaagtggcattttaaagatcttaccgggctcgttccggaatggatgttgaattcctccacaattcattctacgg  
ccaacatatatgctgctccgtctacacccagcatgcagacatagaccatggaggaactcctttggtagggatacttgatgaccgaatctggc  
atacagatgacccaaacattcattactccatctatcgaactgtcaagaaaacattaggatcttccatagttgttcgattaaggtttgaaagagaag  
tgtcagaagaggcgttattttcttgggatgagtttcttctccttctcttatttaacgttgtttgttttcagttttgtggagtttccagcattttct  
tcagtttcttctggtgcttcatggattttgttctctgctatagccttttcttcttcaaaaatcgtcataggatccattgcttggaggtgttcca

aataagcttctcatatcatcagaatcagttcccaagaagtgggcacttcagtcgggcatatatttattccagaaattgaccgcattcccagcat  
atgaagagatcacgcctcctgtatttaaatcccaattatggaccactttgtcccagcttccgcttaagacttttttccagacggatgaagcgtcaaa  
caagatacaggagcattatgcttttttagagatgttactggatccttctgatgtcagttgaatacaagacaatgtctcattatcaattccaga  
aaggccagagacctctgaatgcacagctaagctgtaaacgggagaaggagctgttcatcgtaaacattttcccagtaattcaataaaatac  
cagcctatgtaaatgtaagatagaccattaagtatacttactttgtgacagatcaacgaatggatgcctttgagcgaccgtcagagacaggt  
caccttaataacttgaaaaaagtcatattttgaatataaccttctcccaccgggtaacagccatttcatatcagacgtaaaggcaaagggtg  
tcacatttggccataggaatagctaagggtggaataatcataaaaaatcagctttgatcgtctttccttcaattttctataggatcctcgtcaa  
actttgaatcttttcttaacttttaggtcttctgttctgttttcttctcgttttcatcttctaactcgtccgcatccaattcttctcgcgattttt  
cggcttccccttctctccttctcgtcatcatcctgcttttcttccatttcaacatttctgctttttcttgatctaaattcatgtcatcttcttcc  
ggcgaataatgctattgaacgagttaataattccttctcaatctcagttgagtttacgaacctctgaattcaataacctcgaataagccgattct  
cataaggtgcaggatttgtactggatttgaggatcagcggcgagatagccgactatgtaatttttattgtcaccaggcctttatttac  
agaacgatttctccgtaacgcgtccttctgaagttatcctcttaaccattaacaaaactttggatcacagaaaaacttctctatgaaaattagca  
attgataaatcctgccttcattggaagctgacagaataaacctgtgtataaatgaacttgtagaaaagaggaagtatatcatataaacagaa  
gatcatagtaaatccggtttgtgtatgaaagtatgctttgctcatctattgttttttttctacttttttttggaaagttaaaaattattgact  
taaaaatgcttacctgctgtaggaacagctttcaagaaaggtcttaaggaacaataatctataacttgcacttttgataaccagagctct  
ctttatgatatacatgatgcctgattcattgtttctcattactcaagatccaaaggaaatgtgagtggtgctgattgagacgctgaatggaattcaa  
ttgagcatctagtataatgtccaaaattaaatattgtcagtagcctcaagaaacaattaagcagataatagcttttgaattctggcttggctag  
taaactttgaaaccatttttccgaaagctgtaatagctcctcaactttgctatcatctgctaaaatttaagtgtttctcagatacccgagattgaa  
tacgctttaaactcatttttagacatcttattattgcttcaaacactagcaccaggttagtttagctttcaccttggatctaaatcatacctgtctgatg  
ccgtaccaggcatggaagtatgcttcaaaaattccacagcacgacaataatgcttgagggaatccataggtgtatgggattgctcctactcatc  
acataatgcaagtcgcaagcttgcaaaaatccgaggctcaaaagggtgcaaaagaagcatttctcatacaaaaaagcagattttcatacgc  
ttctacagaaaaatagatcggccaattcggccatgcctcaatgtcgttgtagaaggatctacataattctattaatccgtttatgattcctttaa  
tttcccaccgaacgtaatagcagatgctttcgtttatggatgatctattttttagtaggtcagcaagaattgggtgattgtaaagttaccacatacc  
gtattcgttgaatcttcaaaaagcttttgattataataatccaatgcatcctcaaaagtagaagtagcttcaaaatacattccgtagagtcctcca  
ctctaggagatttataaatcggtcgttttagcggttccagcatttcttagtcagggtagaagattagctttaaagccaattcattttttaagag  
ctatttaccttgcagggtgtcttcttcaaaatgagagcagcaacaaatacttttggtaacatccatacaagatctccatatttatccagctt  
ggcagtagatttggcccctcaaagacttgcaaaaccttttgcgggtccttatttccagagattccaggatatttctgacatattcatgaaccaac  
tagtactaactttcgtattgattaattagattcctcaagaaaatgaataaaaattaaataaagaatataaatatggatgatattggccttggctga  
ggaaaatgggtaaattggttaagggcacgctattcacagaggtggtctcaaaaagccaaagatagaaccagtttccacatctataaattatag  
catttgattctttagtaattggtaccgaagaagcttcaagagcttatacccaattcaaaccaaagtataagatgatgtgtattttttag  
aacacttattgtttacattcagaatgcacttgagttcagctatctaaaaagcacaagcaaaaggactaaagtaatatcattactatgaggag  
ctaaccaatccttcaatccgtagtcttctcagctattgtcgtttttcaagtctcttctgtatgtacaattccgagcgtaacctcaaaaaatt  
aggaaacagaagccactattgcaaggatgaattgaaattgttaagaatatcactataaatgtggtaaacccacttccgaggttatgctataaa  
caggatgccacagtaaaataaagaagcagatgctttcatcagcttcatcgttcccaatgccaagaccttctattcattaaattcaatgctttga  
atagtttgaagctgttcatgactgagacagtagggtatttttctcgcgaggaatcttttccgtaagatacctcaaggtctgaactgggacat  
gcagagacataataaatgggcatacgggatcctataactctaaatgttgttttcatgttgagagatggcttccagagaacggctataaaaa  
acaaactgcacaaagaggacacagaagaatacagttcattaaaaaaaattctttagcatagaataacctttagaagcgatatacagata  
gagcgccttcatataatcactttaaacgaagggcgtagaaactgaaacttgccttctcctttttagatatttttacttattgatataaaaa  
ttggcttctgatccctcgtttctcctgaattagatataccaaacttctcagctcgcatacatacaatcccaacacaaaattgatctaaagtatat  
gtttctaggttattttggccaagagcttcaattacttccggaattctcaagaaaggaatacctaaacttttagcgtgcctcgcgcaaaaaca  
atgaaaaattcagaagccagcttcttgggtgcaggatcacattgatggcctctgtgccttggtagattttgatcctcaaaaaatgctagtgt  
cttcaaaaagagcttatagagtagtattagctggttcttcttctcagattacaaaagggtctgtccagttcatacgtctacggaagaaaa  
cgacaaatagcgtcagcaatgtcatcagcgggtgcagaacgatctttaaaggattttgaagaaaatggagggattttatcaaggtcggaca  
acacttctgctatgaactacattattccgaaggtataataaagaacgcgatttgtttcatcaaccatattggtgctttgtctataagctaaagggt  
gtaactacttattttaggaatggactagtagtattggtcaagctcaggatcagatgcttccacatccattgaagatgttgatcgtctgtttaaa  
aaagatacaggaagtagcctaaatgaactctttgatgagtttttctgagcctctggcgtggcaagcttggcacaggttcaaaaggaaact  
ccgtaattcagaacatgggttgcggtcaaaattcaacatccctcagtaacccaaaactcaccacttgatttagtaatgactcgggtgggtgttcg  
agcaatcaaaacttcttcccagactttaaactgacgtggcttccgatgaaatggaggttctcctcaagagctggactttaccagagaagct

ataaacgcaatcgagacagcagagcatttcgatcaaatctacttctctttacgttccaaaattatctggtcaaagcctagaatgttggtgatgg  
aatatgttactggagcccgtatagacaataccgaatTTTTGaccgaaatcacatctcaaaagacctgttctaccgatttatgtcatatTTTaatg  
aatgattttggaaaaggtggtcatttacattgtgacctcacggtgggaacgtgttattcggaaataagcctaaggagtcaaagtcgccgagga  
atctcgaaattgtattgcttgatcatgggttataatcgagatattccaaacaaagttcaagttgattacgccaatctttggctaaacattattgattca  
atgaagaaaaacttaagatttatgcgcaaaaagtagcaaacgtatctgaaaaaactttccctgtttgagccgcttaccagagcagccttac  
aaaagctgaaggatttaccatgagcgggagagaaaagagaagaagagcaaaaaaattatgaaagttatccaaagaggcggtatgcttca  
aagtattattaattattaagcaatatgcctcgattaacgtatgtatctgttctccaatgtttccctgttttgctaacctgaaactgcttctctaat  
gaaaaccaatgacttagtccgctcattagatgaaagttacatactcaaactggtctgaaaaaattcttaattatggctaggtattgcttaagt  
gcaattcacagggatcggtatggaatcgtgtggaattctcaatccctttgggttaccaaattgctaaaatgttcgcttaccaaaataaatattcttg  
gagcatgctaaggtttacctagctgaagactatTTTtattacaagcataaatactTTTgtgaatgtctgtcaattaaggcgtattgttaatacat  
ataccacctagctcaggataatactttcgttatgtctcatctgaactctcactttctctttttatagtaatatcatcaattaatgt  
ttcattctcgagctttcaactgttttagtttaccaaaactgtctttacccttccatattaactagatgcaagattcaaattcgtttgacgttatt  
cttttaggaacaaattagcaattccatattatcttctgactgaaatatacttctttcttttataaccataatgttcatatagaccgttcatgg  
gcaaacctaaaagtccttcatatagatgagaatccgtttaccggagaagttgatgggtcattttcttaagagatataattaatctcagaaaatg  
gaaatttagaagtgggaaacctcgtataaagcgtccggagatgatctctcgtttacaagatgcaatataagaagtttagagaagggtttgc  
taccgagtttaaggctttaccattgagcttataatcgaaagaaatgtacgtggtggaagtttagtagaattgctctcaaaaactaaaatata  
aataatctactattgaagcctcaaagaagctttgactttatacctcagaccaggtatggacgaaagtaacctgagtaagagctgatTTTTaatg  
ataaaactctaccgcttacgcacaaacgaatgatcatgagcttcatgaaatTTTgtctccgttgatgacaatcagaatcaagaaaaattgaaa  
gaatggctttcgaagcccttcaggacttctgaaaaaattttgagctcccagaactatacaagagggtattgtatatggattatgtcaatcct  
tggattcaaataTTTccaccaacatgctctgaaaaaatacaaaaagtactatcaatcgttcggaacttacggtgaatattcttacttctgcttccat  
gtatggtagtgggtctgaattatgccaaggattctgtcgtcatcggtgtcatgggcagtaacctcatgctcgtcaaaaaatacaagggtgga  
agctacttctgtgaaactaggagaagggaagaggtggtggccaacaatgttattacgtcgagaccaatgaaaagcgcataagtcaggcata  
aacattcgtcagcgtatataatgtagctgggaaatgctcggactgtttaccaaactctgttttactttctgaaagccagtcagatccactttgt  
acctattcttaggagacagattttcaatagcgttcaagtcagagcttaggagctggaactggttaattgtccagagggttatactttatggatt  
tgcaaacactggactgtgaagaatacttcaagatttactttggcaactaacaagctcctgaactttcacattcagaagatacaaaaccttga  
tgtacgttgatgtattgattgacaaaatgattggcagattacgatgttctgttgaatagctaaagcaattgatgaaacaattacaggttctac  
ggatacctTTTTcaaagagatactagttttgatgacgacgacgaatgatgataacatgagtaacctgatgaagtttaagaaaaacgggttgata  
taagtaataatctctgatcagtcattaaaacaatacatataagacgctataccttcgctaaagattatcttaaatgctaaaatcgaagaga  
agagtgtaagttgaaatactTTTaaataactcgtaaaaaattggagggttagggaacaaatgaaatagaatTTTTgaaaatccttattcattt  
aaatggatcatcggagtcataatcaactttactcgaggaccaataataattcttcttagcaccagaccaggtatacaaggctaaatagtaaaa  
cacctgcaagaacaataatgcatagttcatgttctcaggagttactggacggatattaggcatacaaaaaataacagacacaaatgaagcca  
tgctaccgcaaaagcattaacaggcatcagatagccatccaaattccaaggacatgtttatagttcattctttaccaaaataatctgcaagc  
aattgggattacataactccaatccaatgcaatggaagttacgtgaaagatagcctcaatggcctcaatactgccaagaccaatcaagttaaac  
caatacaataaaaacttcaaccatactgcaatcacaggagtagtctgtttgttgaatctgtaccaataacagaaaaaggaagagcttga  
tctctgaaagcggcaaatgtgagcgtttgctcagatagaagttacaccagtgaaattgagaatacaaaaagcaagataataaaggcta  
agcttccgttttaccgagaacatcgtaaaatatttgagcaacgggttcccaatagaagactgactgagactgcaaggttcttccatacaaa  
aaacgagaacaatataatccatccccaaaaatacgtcaacttaagcaagtgcaatggcctgaggtgcacgaacagcagcattttcgat  
ttctcggcgatattgtgagtagcatcataatcagtcagaccatgctacactaagaaaacaaaacagaaaagagaatccagttggcttccaac  
cactagacggctctacgtagtaaacgtactttcaggttgaatgcttgcacattgctaaagcaaatgatacagataaggagaactagt  
aagtgaaggcagcatagaaccgggtaatacagatcaagcaacgagtagacaaagagttgatgaatccatgaaacataataatcgagccatc  
acacctacgacatgacgatttgggtgataagtcataatcttagaaaacggacacagcagaaaagcagtagctgtgcgaagaccaatcgggtc  
tacttacaccagcaacctgaccaataagttaagccagcctactaccaagaacaaactggcatgtattgggtgtaaccaatcttcatatgtaa  
agtagagtcacctgatgtaggataagcagatacaagttctgcaaccgaaagagcgatacacataaccaacaccgccaatgaaccagctcc  
aaacgatagcggcagcaccaccggcaacaaaggataagagaaggtagtgataattgtggcatataaccagaaattgaaatgcaatgaa  
aaggtagccaggttgaaaaactccgtttaaaaacgggtttatatccagttcaactagcttatcgttctgtttaaagcgaatcccaattcct  
ccacaattggctttaaaggcttcaagttgaagggtcttttcttgacagcgtcaatgaaaatagaccgattgtgctccataacgatgagctc  
ccttgagtcgatcttgtttttttgttcttccaattatatttccagaagtgaaacccgaagattatgaaataaaaataatatacagagattaact  
atgcaagagatccaaccaacttgacaaaaagattgatgatggatgaatagatgtgtaatgaaaattcagatatcaagtagatctcttagaag

taaagatttggaaacataaattagcttttcaacaagtctttctcagttgtatctaaaaacgaaccaatttcgaaaaagcagaggctgttaaatta  
gaattcgtactagcggagtttagtatgaatttttataactgattcatgcttcgcttcgagctgtcatttaaacgagactgattccacattttcattt  
cattttctcacaatatcattatatgctcagagcaattgaatcagtcagtcacatcaacaatatcttctaactcttctgtaatatgataca  
gaaaaattgatcttagtcaaaatcaaaacgccttattgaatgaatattcattcttcttcataggagtaagttatttcttcttgtagtgcgga  
gctcagttaaattgatacaaaagacatcgtaacagagaacgcggcgtctcagcttaaaacttattcgtcaatgttttagtgcctttctagacaaa  
cagttatataattaataaattgagaatctcatctcctgataccgaagttacagattgactgggttcatattctactactgcaatttcaaca  
tccacatatagtttaagcaataaagggtacgaagcaataacagtttccgttttgtgaacttacttttagtaaaactatttttgaggttttatactt  
caactcccagggtctaaacgttttcaaaggctaaggctttgagctaccttgacatatacaggtagtaaaagatcctttactattacttcggaat  
caagcgagaaataagttatttataaaggatcgactatcattttgtaacggctttatagacttgctcgtcaatattggcaagaaaaagtcaaaa  
gagccagttcagctcgtggatacgaacgacctcagtccttctcgtgctactcctgtccaaaaaaagcagaaaaataatgataccaagaacc  
gtccaagtggtgctgtcaaaagaaacttatttctgcccctatgaatgacctgtcaacaatgcgcttcatgaaacaaatttttgtagactc  
cttacagaagaaacttaccgttgatggatactgagttagaaaagttgaaatctacagctttatcaacttcaagtcttcttgatacatggcaaa  
ctgaacttcgcttcgaaagaatacaaacattatgagttttctgacgacgaaagtaagcttattttgattcctcgtaatagctggattgactct  
ctaaaaagctctgtaaatcagtcaaaacttaaggcttaccctcaaaaaagcgtttgtatggtctacataatttcttctgtagatattggggtcaa  
cggagatcagattctggatgccttttctccttcaattgtttcagtagaagattatattgctggattgctactgagcctcatccttgagaatcc  
ttcttctttaaactcagaggtgcaacctacgaagtatacgggtgtttgtagacaattggacgagcctttgctgagctcctgtttcacttctggtaa  
caaacggctagctccttgatgactaaaaaagaagagccaatagagccttaccgatagtcctcaagccagagcctcgtgagcaggatgaaaa  
ggattccaaagatggcgtatgcatattccatgacttagcttactcaacaataaccgaggaagaggatagccaggggaatgacccatgagctta  
ccactcaatatgttaaagttaaagatgaagttgctgcgactttagcttattgggcaaaaaggactcagatgctacggatatactccggtctgaattag  
agggcataacgagtcaatatctattctcctcaaaagaagctgaatcagttctcaagagaaagcgtggagagttatgtcaaaaactaaaggctctg  
caagcaaaaaatcgtaatgaaagagctgttaaagcacttcaaaatcaaaagctgctgaagaggaacaggctactgaagagaataaacctgat  
tctaacgatgaatcggatccagatcaggtgcataatgagtcgctcatgaggaccagcaagcaggatagatgaagatacagacctgtggcg  
gcttattcaatgagcctgaggaaagtagtgtagttgataacaatcagagtaattacttacttccattgctcattgcatcgtggtaccg  
gccttctactacattacaatatgaactgcacaagttagtaataatcttcatgctgattataaaacatatcctattggtcatcttgggtggcaatcaa  
tatgcttctgtaaatgccttaccggacaaaagacctttatggatgctgaaaccgttttgccagtcctgttttagcttcagattatattgctactctg  
tgctctttaaagctgttttcttcaaaaagctgagtgtaaatgtttcctaagagcttcaaaagattgtttgagaagctttagatgagcaattga  
gtgcagtaaaagcaagaagatatgaaaatcagaaaattggagggtattctaaaatctaaaggacatcagaatacgggtgtccaaaacaagat  
aggcttcaaacctattgatactacgaaactaagagcactatacatcgtccaccagaaaaaattatagaagaatggaaccgcaattgacagc  
agcaatgcagaaaaattcctgattttcgttaaccagttactgcttctcagataaaaaacgaaattttggaagctgttaaaaataatcaattgctca  
ttgtttctggtgacacgggttggttaaaagtaaccagattcctgctgtttgttagaagatgctttatcacagggtgaacacgctagaattatggt  
actgagccaaggcgtattagcgtgtttccctgcacaacggtttcctaagagcttaggagcgattcgccttcgaaatcgtctcatgaaatggtgg  
gttactcggctcacttgattcaaaaagcttctgttccaccattagttatgtgacaacgggtgtttcctcgttacttgaagttggcgacgaaa  
ttgagctgttactcatttaattatgtagaagatcatgaacgagcattgactcagaccttctttgattcatgcttgcattattgaaagaatacc  
caaagttaaaagtcattgttatgagtgctaccttgaatgctgaaaaattcaggcttactcaacggcagcagtttgattagtagtccgggtaaaac  
attcccgtacagagatacttttggaagatattatgcaacaattccatggtgatatactcttgagaaaaatagcgcagaaacaattgacgaaaa  
tgatgaatatgatgttgaagaaggagaaggagaggataaggattctcggattctgaagctgtttgttcaaaacccaattccgaagcttataacg  
agaaagtcattaactatgattgatatttttattgaagtagcttttactgaaggtatcccaatacagtaaatgttttgggtttttccctgg  
tatatcagaaattttcgcaatgaggtcgttattgacgagcttccatgttcaaaaacataaggatttccgtatttacttctacactcttctggtac  
ctctgcacaacaacaatcgttcttgagattccacctcgtggatgccgtaaaatagttttgtctacaacatcgtgaaacaggtgtaactattcct  
gacgttacttggttattgacacaggcgttcatcgagaaatgcgttataacagtaagaggcatcgtctctgtttaaactgacaccttgtttctcgtgc  
aaatgccaaagcaacgtagtgagcgtgctggccgttccaggaaggtatctgttatcatttatttcaaaaataaaacgatacgcagttcttctg  
atatcaaacctcgtgatgctacgactcaacttgaagaggtgttttgagagtgaaagtgccagatgggagaagttcaagatgcttaggaa  
atgcattagatgctccttcttactaacgttggctgagcattggaaaaactacaacactggagccattggagaatttgaaggcctaactaagt  
taggtaaaactctgctcaattaccattgatgcttccctcggcaaaactactggtgttaggctgtttttataaatctgttgatgcaattgttcaattgt  
cgctatgatcaccattggctccttctcgaacgggttgactgagtttgcgccaacaaagctgtttatcgtttgcaaggaaataactaga  
agtgatctactattaatgtattacgcatactatgcttggagagaagtgctcctaataaactaggccaagtgaagaatgagttttgtagaaaaa  
tatttgaacgttgaatctttgagcaggtgagtcattgaaaatacaattattgaatgagctgaaagatgaacctgatctgcaccatttattg  
atacctgtaaaactgcaaacgatcaatttctcgtcgtttgagttgtcccaaaagctttgatttattctcggataacgctgaaatggtttccgca

attattggtgcttcgttatatccaacacctcaaatacgttttgaagaaatattggacatcgttcatacaataagcgtatccgaatcttag  
atgtttctgtaacaacaatctgagatgcaccaaagcctccaagattgttgcatacaaatatgatgtctccacgagagcaagtgaatac  
tagccgaaactacgatggttacaattcgcagctactttctttgcttcacgattgacttgcgagaatccataggtcaagtaagcttgacc  
cttactgtgtatctggatagtgctatactgcttcacatgttacgaagctttatagaatcatcttttactgcatctttctcatctgaag  
tatactttcagatgaagattggctgttattgttagtctgtttccctctaaactttaatagggtaaaaaaataacagcataaagaaa  
catccataagtttcatgctacgtgtacagttctatcgtttggctttcaaaaggaaagcagatggggtttttcgcaaaagtatatattagattat  
tatagcaaatattaacgttattactttaaaatgcaactgaggctgtttttgttattattagtaggcatttgcattagaaccataaagaaaa  
ctgagggtatcaaaaaaagaaaaaaattagacctctatagtagcaataaataagagtagatgatggcatcttaataaataagacttga  
atatataacaacgcaaagtccaagtataaaatagtagaacgaagcagaaaattagacaagaatcaatcatagctttatacctaagccacaac  
aaaaaatgttagaaaatcatctgaattctcgaattaagttagtctcaataaataaccaatataatggagcagatgaagttgaattttggaa  
ataaatgtataaaatagagtgcgggtcatttatacattttctgcagagaggaggaaagaacggattgttgcagagaggacattatcagaaat  
gttcagcaaatatggatcgatacaattgggggtataaatgtgaagacagggaaagtcccggtaaaaactgtatcttcggaatagttgaaaga  
catacagaacactcagctgatcataatgataacagccctacagcattaaatccagcatcctctttctttcttgagccagacgtcttgaggc  
agagccgctagtgtttgaaggtagcggaggcggagtagtccggaaactgtgtataaacgaacagggaaagtgtcaacaactctttatta  
caggagattgattttttcttaggtccgtaagccgctcaggaattgggatcctgcgctgtaaaagctctgtagaaacctgtaaaagctct  
gtaaagtgaagtataatagacagagattataaggaaaagaccagcaatgacagctataagtagataaaaaccaagccagactttataagac  
ccttgccctataaacaggggtactattctagctttagcattaatgtcgcatatctacgaacaagagcatcactatcattaagtactgtatatt  
ggaggctgaataaaatctgagtgatcttcaattttaaccgtatgggtgggaaataagtagcattggaatgcttaacgagcattttcgaac  
cgtatggctgaaggaattcaaatggagaagattcagatgtgtactggcattataaaataatggcattagcgtcatcggaaatggctgttg  
aacataactgtatgcacattgtcgaaggggctaaagccacaaggccaaaggagtagaatcagacacatcgttccgatgggtgtgtgttgat  
aggaaactgcaatgaatcaggatcatggcaattatgagctggagtaagcgataaaaatcccttgactcactatctagagtgctttttggt  
aaaatcgtttaaaccactgtactagaagacttaaaacaacgacatattgcttggaaatcagcagatgctttttgagatagtaaggagacat  
ccgtattgtgattattgtgtgtttacgtcagtaggtgaaactgtttattatcgatagcatgattgatgatactagcagttcaaagtagacaag  
ccagaactgaggttagtaccatagcacggttcccggttaccggaatttcatagtagtcatgagaagaagaaccacctgcattttgggggaa  
gatcctctagcagaaccggaaccgcccccttgggtcgggtggaagacccaaagccaccggcttctgggggaaagatctccaccaaacgagc  
tcgaactgaacgaccgatgcagcatggcaccgccagaaaaaccctcccgtttggtatcgaagataccggaatcaggagaagagccct  
cgaaatcttctgacggcgggtgaaatgaaggttgagttggactaaggttttagggaaaaaggtgagaagaggaaaaggatcctgatgggtc  
acggtagtcatgctcagaaggattagcggaaagcaactctatttataatcatgatcaagcacaacccgagtagctggggataagagaaaga  
aggcaactcataagaagaatgaagaagaggagaatgacaaaactcaaatatggagagcgttttaacgcttggagttggaataagaa  
aaaattgaaaagtagaaaaaccggtgaaatgaataagaacacaaatcagcaaaaagaaaaaaaatttctgagtcctaaatccttaa  
aagatggacacctataagcgaatacaaaaaagaacaagaaccaaggaatgtactagcaaaatagttttttttctttatggaaaa  
gactatgcaagaagtttagtattcaagtcagtcaattcaaacgattacaaagtacaaaaggttaaggcaaggaacatatcaagggggga  
tccaaacaaaacaagcccttttaattctcaaacgtacctgaacagccattaatgttaataacaactttaaacgaatcttttgcagttgtattcc  
gttctgttttagaaaggctaagtagggtagattgagaaatgaggtagatcgataatagatgcgtagtagtataaagaagagaaaagccaca  
cgcaacaaccaagaacgacaatgggaacctcagcaattctgagacaacatttaaatgaaaaacaatttacttttgaataggtggaagt  
caaaacggatgaaagagcaatgggtgaatgaaagtgtgtgaaagtgtgtggattttatgaatcacacccttttagcgaaggtgaattgat  
ttacgttaaagaacgaaatcttcttagcgtaaagttgcgtaggtgattcgataaaaaatagcatcggttaaggatcgcaaggtcatttgaat  
tcgttctcgttttaccatcggtctgtctggtcgtaatgtgagtcagggtcacgtacggtgcgtttaaacaacgtaatggatgtgttcagaa  
gtcgaagaggttgaaggcagagggagcaaggatggaagaacacgaaagaattctaccgtaaaaaagtcgataagattacaagaaaaaa  
aaaaaaaaaagaaagacaaggaatagaatagtggttttaagtgtgtggttaggttaaaaaaaacatccatcttttgcctttcgttctt  
gggggagcattttgatgttagacaaaatggatgcgggaaaatgaagaagccttgcgaatcttttacatagttttgctttaaagcctttaca  
ataccccgaagccgcttaggagtttctttgtacaatcaattgggggggtgatttcatagttatattttcatcgtctatatttgaaaaacag  
acatggaaccatttactggaattgtgtgtcttttgcagaaaagcatcttagaagcatcgtgcacgataatcgttactatgcctattagtttta  
cctattagacctattgtttcataagcgaactatacacttccctgctctttattctagtgccgcaagttcacaccatacaagacctcgattgtc  
cttcgcaaggaaatataatgtatctttttctctttgcaaaaatataattctttcgggggttctgctttttccagcaagttagttgaacttactcatt  
ccattctatacaatcttttctacaacgctgcaaaaggtttcttttgcgctgtttcccttggcttttaatacagactagcgaatcttttacgttcg  
gtaaaactttgtcaaagcttatttttggatccattccgtaagcatcaatgaactgacaattgggaattattactatttcggtgatctcgacatcca  
gccttctgttctctgtttgttttcttctgtttttattaacgatcgtgaaaagctgctaccttgagtttagtgattccatcgcattgtttcctt

ttgttgcttcaaatatcattatattttattattatgatattgctatctgaacattgatcggtgacctctaccatacgataaacaagagccgacata  
aagggtccatcaaaagagaattgagcttgaaaaagcattctcagtttctctcgcaacaattccaaggttcctactgtttgtctggtttgttt  
gtttgtttgcccgaagcatctgcaactttataatgtcgcaaattttcatttgattatcaagcagactcagttagcgaactttttctgacg  
aagtcggatggtttttgttactccgagggtggaactttcttactccgccactcgccgatggaagctcacaagagatataattttagcttctgtac  
ttcgaatgagtaattgtttgttactttatagttgtctatttttgcatcacgaggatacaaaaggagcgcctactccacgtttttcttctaggatta  
accagaatctgtgatatttaaatccccgcaaagcgcaactaattcacgggactagtttaggaaataaactttgaggatagagtggaattctctct  
aattgctttcgaaagaggggaattttaaactgtttgtttattggttctggtttattttgtttgtttacttttcttatttacttaaacctcctccac  
tcgtttcacttgatctctgttttacttaattccaagttagttatctatttaataacttctactgtttcccagctccttctgtaattcgtatcatcattg  
atcgcatttaccttctgtctatattttactgcaatgtcttcaacgatcctgttgaacattctgctgggttcaatcgccactgagcatcccgaatt  
atccaactaagtaatacatcgaaaatgcagcggctcctgcatctccatcaatttagatagccagttatcacctgagtcgagcaacagcaa  
cagtatgctgcatgacccaaagtctggcggcactcaagctggaacatacaatttcgaatgttctaataaggaagcccgtattctgaggat  
aaggaagatttgaaaaacaacgaccttggaaaagattatcctagaattgagaattctgaacctttatttatacgttgacccgagttcttcag  
aattcgccgtcaattggccttttctgtaactaaaattaccgctatttattcttggccgctttgttccactttgcttctccgtctttccggt  
cccactgaagtcttctcaaatctatcatattccatgactgtctcttttaactattagtttgttctttgtggttacgttagtggtctgtctgctg  
ggtcctctgcagaattgttaggaagaaagcttctttgatggtcggtatgcttggtttggatcttcaacattgagtggtggtgctaaagatc  
caacaatcatgattgtcgattttcagtggttcttctgtagtctcttcaacaattgtcgccgctgttttggatagttattctaactggtatcg  
tggtactgctattactatcttctgctccctctgtttgatggtccttactatctccattattggtggattattacaaatcttattgggttgagat  
ggacagagtaacttctgttactgggcttctctgctgtttctattacttttcttggtaggagactattcaagaaaattgtagaagtaagg  
ctttagaatatcgattgaaagtaacaaccactttgtgatgccaagtcgaggaggagagattaactgcaaagatgcatcgataactattgt  
tgattcccttaagctttatttaccgaaacctatcttcttggctcactctactgttctctgtatattggtattttgtacttacttttggaaagctatc  
ctattatcttctgctgaaaaacgccatttctcaatgggtgttctcaacttcttatacggtttggtaggtgttttattggcagtggtcatcaat  
tgcttctgagccttggtactttcgacaggtgtgaagcttggggaaagccttaccagaggagcgtctccaccttaattattggtgctttcacct  
ccctatgggtattttctggatggatggtcaggtcactatgcacatgctcattggattgttcttagttgtctggtttggttaccggtatcggtattttg  
ttgattttctgaattgatgaactacctaattgacgcttatttctcgtgagcctctgcatgctgtaataactattatgctgtagtgcggttctg  
caggattccctctattgtctcaaatgttccataacttgggtgttgggtgggctggctccttttggatttatcgtgttgccttgattctgtgccc  
atcatattttacatctatggtaaacaatccgttcttggagtaaaatggcgggtgtgctttgagcataaggataatattataataaattgttgaa  
acctcatgcaaaataattggtttggtatgtttcacagaaatcgatgactttttagaagcctatggattaccctaggctaaaaagaagaaagg  
ggaaaggaaacaataaacaataatagcacgaaaaacagagctttaaagagattgtttggttcttaactctagcatgattttatgataaa  
cgaactatggtgacacgttctactggcttgtcaattaatttttagacttatccgattgatagcttaataactatttttcttgccttattaaccaatta  
cgataaaaccagtggtttggcgtttgtatgttagcgattccaactgaggatgaattcaagagaaatgagctatattcttattcttagtta  
atattttactttgctacagtgagttcagtgctcaagcctagtttctctgaaagacttgagactgcaaaataaagtgaaaaaaatgct  
ccagcagtgactgcaactggccttcttactaggcaagcgtctaccactgagctacaagagcttgttaaatgagggcacaaaacaaaa  
ttataagcttaatttgaagttaaaaaaattgaaaaaaaggaagattgaaaagattctgacagatactccacttagggtcgccgaaa  
aagatctttgttctcaaggtgacaaggttatcatattaaagatagaggatggacttctgctcgccgtcgccgtacaattgagtaacatggtgc  
cgagaacacgttcttactgcaactatctaaactgacagagcgtagaaatattttattgcatgagcttctgacgtataatgcaaaag  
aggcaagtttagaccttaggggacgatagagaatgtcctaaggctgtcgtagggtatcataataaagaggatataacttaaggcgtta  
gtaataaacaataaaacaaaatttctgaaaggaacagtttaagaaaaataaagaattcgattgaaatcgatgagatctttttcaatgg  
attcaaatgattcaagcttcaattgtcttatgccgtaatctgtaataatgatattggaatattggtgattttctgacttccaacaacaaaacatt  
accatacagccagacctgtattcaggttagcaattcgttctggagcggaggatagagaaaggaagcattgaagaaattgctcaaaataagcatc  
tcaaaggtgtcttttttagttgcttctgtaaaacgaaagccacacaacattgggaaactcatgaaatataatgtaataaagctataatttagggaa  
ttggtaaggatattttcatctttatttttcttcttggcgtatactttaaattttgtttatgtttgcaattgtagagtattgtgtgtagaaa  
acgaaattcaggtttgtttttatttgatcttctgttgatacctcaattcgttgttccgtttataaactatttctatttccattgtgttagtcccta  
ttacgattgtgattgtgcaagattgtttaaagctatcttaattttcaacaacattgttttataatagggaaggaaaaaacgacacataatctggtt  
tcgttcttggattttgattcaacttttttttcaatcaccgctttgttattgattgcgtacctaagtaactcttcttcttgtattattggtaaat  
catctttgaaatcttttactgctccgttgagtttacgggctggtttcattgttttggaaaagaaaggaagaaaggtaaaacataatattgcttct  
ctattaactcctccctctcccttctgctttattttgcattagattttctttatcgtattctatttagttttatttctttttttttttgtttgct  
tatccttattgaacgatgctgagcacaatactcaatcttagatcattctagattgacctgaaaaacaaagtaaccagcactcttataagatg  
caggaactggcttggaaaaacaaaataccgccatacttacgacctcgacaagttggttctgaagccgattttaaagatgtaaaaacaat

cccgctgcaataatccaggagatTTTTtattgtcactttgaacgggtccaaacgatcccgattggctgtcaattggcgtttggcgacaaagctccaaa  
atatcgtgtcatgggatgtgctgtctctgggtcagtttccggttctctccttttctgggtctattcccgcagtaatgggtaactatcacgttgtaa  
aacgctgccattcttggtattagtctctatgtgtgggcttgcctcaggacctctgtatgggcaccaatgagtgaagcttttgctgtcgtaaacc  
tatgatcgtcgtgttttaattcttagcattttcaaatgtctgcctactgccaaggatattcagactgttatgatttgcgtctcttagcggtttctt  
tggcagtttctctgtcacgacagtcgctggctcattttccgacatgtttagcgtcgaacaagaggcttggctattgagcgtatgctgccattatct  
ttaacggctctctggtagtctatcgttgggtggttcatcgcaaatcttattaggctggcgatggatctctatcttacagcaattttgggattttt  
ttcgttgatatgcatgcttatctttcatcgtgagcgtatacgaacaattactgaggaacgagcaaaaactggttcgaaaagtaaccggcaatta  
ctgcctacatgcaaatctgaagaagagccttagtactgtcgtactttaccacaagtactgacctccctctcgttctgtctgtttgagcccat  
tctgttgatcgtgtctacataactgctttcgtctatggatattgtacggttattagaagcttatcctgtaattttcgtggaagccagaggatggag  
tgaaggttattgtctttaccctaccttgccatttttagtaggcgtatgattggttctattagcgttcttctcaacatattacttaggcaaatg  
gaaaagaacaaaggcagaccagcgcctgaagcacgacttctgctatgatgcttggatgtatcgttcttctattggcatttttggtagcatgga  
cgggtaattatacaagatccattggatagttcctactttatccggtagttttgtggggttggatcattacgatcttcaacaagcataaattaca  
tcgttgattgttattcgggggttctgcttgcctattgagcctaatacacttttcggagctcttccggcgccttccctttattactactcaaatgt  
ttaataatttaggaattggatgggctggctccttagtgggtttgttctgtcgtctcattccctcccttctactctttttacggttctaaaatcc  
gctcgtatgagtaaactatgttgaagattctgattaaagtaatcgctgttttctatagttttttttttcgatgtcatgaccagaatcatcaaat  
tagataaaatggttttatggcgaatcatgttcaaaaagcgtataaaaagtaagcatgtttttttttcatagggaaaagttgggtgtctggaat  
tatttactatatacccccaataaatgtttgtttgttctgtatgccaagagaagtttagctgttatggtaagttggaaaggtataaacaagatga  
agagagatataattcaaacgtagaataggaagcttaatgaaagcaacgaatgagtcagaacaaaatggtaaatagcatgaaagtcacaca  
ttcaaacacctggtttttgggaaaatccaattctatctacggcggagattttctgaagcaatctttattattgagaagaaatgattcttttatt  
aaaacctattttcttaggtttacaaaaactgcatattatggagaatcttactgtaaggtaacagatattctattagaggattaaggcgataag  
ttgtaaggagcaacgagttgtatctaagaacattgaagggaaatgagaatagcttaacattgtttttatattttaaatgttgagtgaaaaaat  
agcgggttcttctgtcttattacatttctattataagcaaggtgatgcgactctaaggtatgtttacatagtactggatgaatgtcttttatt  
ttataattcaagggaaactggttattcctgtaaaattatcagctcttgtgtaaacattgataaaaaaatgtggaattcactcaggatagcatgct  
ttacaacatctgatacaatggttttcaacgtcctaaaagcacagttgtatagggcagattggaaaacctttacagagctattgattgccacatgtt  
ctaactatcaagtctatcatttgccttggagagaaactacttggcattagaacatttatgaaattagtagttcattcagtagcagggaaggaga  
ggataattcaaatctagagatcaaacatgatgcttaagagttatcaaatatcttaccctccgctgatgaactgttcaattacagtagactg  
cagacaagctttttaatttcatttcacaatgccaatagaaacaaaaagatccaaggtcccagggtgaaaataacgcttagatactttcaagtat  
ttctctctttctactacaaaaataaaaaattccatatcaaaaactgcttctgtatctctttatggattcggacattccgatggctcccat  
gtttattacattgtacgtttttcaatcatcttaaaaatacaatgctctaactgctacgttatcatcactacagtggttttgatacacttataaaacg  
aataaggatgtcactaagtctcagtaatccattgatgcaaggcgacatgatcgaagaactgtactaaagcaatattcaggaaacgtgcggt  
atcgcatagagattgttagaggatattgtaaaagaatagaggcaataagcctgtaggaagaataggaaacaagaacagactgggcttctaa  
tggacctgtaaagcagacaatgaatagacttggacagcaagaggagctgataactacaaataatgtcaaatcttggatggcaaaggaaagga  
aacaggaagtgatcagccagctatcggaaaaggtaaatcacagcaagaaaagaagaagattatcggtatgggtgataccatccagtatttatt  
ggggaagaattcaataagaacgttatgtgggtggaacggaagttgggatggggtcacttttctactgtttggctcgcatacagccgggtagcgaa  
acggcgggttgattgaaggtctgacttccgacagaacattatcgagaacatctattgatgagattcgcatccttcaaaaaatctgcgaaggcg  
acgataagcatctagaaaagaccatgtaattgccttattggactttttctgcaccgtggcccaatgggtctcatgtgtatgggtttgaagtt  
ttgggagaaaattgtctgagccttattcaatcgtatggacatcgtgggttccgagaggaattgttcaacaatctcatatcaattgctcattgact  
cgatttttgatcgcaaatgcggtattatacactgatttaaagcccgaanaatgtttgatttgattgaggattcagtagtacttaatgatctgata  
gtcaagcgtcgtcttctgtctcaaacctgcagaataactacatcgaccgttcaaccgatgggcatgcttctggtagctcatggaactcctcaaaa  
gaagtcaaatcaatcatctgcaggtcaggtgattgctagtatccttttacttctacccttactcaatttcttagttagaaggagctgttcagaaa  
tcagtctcgtgatagttctcaacagatctaattcaaaaaacaagccttgcattcgagtcaaaaatagcagacctcggaacgcctgttgacc  
ggaagcattttacaaatgatatacaaacacgacaatatcgctctccagaggttatacttggatgccaatggggggcttctgtctgattgctggagtt  
tgcttgataatatttgagctattgactggagattattgttgcaccgcgaagtggaagttcgtattccaagaagatgaccacatagctcaaatc  
attgagctacttatgacctcctaagcaaatggctttatccggaaaacattcccgcgaactgttaaatcgtctgtggcagcttctgtaataacaca  
gattaaagtactggccattaaaagatgtcttagagcaaaaatatttttctcgtctttctcaagaaaatttctgactttttattgcccttctttc  
atttgacctgtgaagcgtgtcaatgccgatataatgagtaactcgcttggttacataacgttctgaccccaattttaaaattgaggatcctggg  
caatatggatgataatcctggctgggctaataaaatccgaaaataaagagtaactatcttgaagttggattctttgaataagcatgcatat  
ataaacattacgttcttaattttgggtactaatggtagcatatcgcaaaaaagatttagcctggggaatgacatgctatttagcttttactaga

ttttattggagaaacattttgttcttctgatatgttggcttatgctttgatgaaatgataagtcagctgacagaaaaaatgatttaattttt  
gttattactttgttaattttattcttttcattctcttgcattcgaatgaatggatacatcatgtttatgaactaataaacgattagtgattaggattta  
ctagactaaaataatataaccagcccaatattacttctaataaaaaatagaactgtaaggtaatgaccataaataaaacaaaagattgtt  
gtacacttgccagcagttgacgtgttattgctttcaagttgtcccttgcgttacacgaattttgtattctcgctcaaagtaatttctatcacagctg  
agcaaaaatcgtgtacacccctgtttagaagaagaaagttgagcatttgattgctgatacaagtcgctatagacggaattttggatctattttg  
tagctttcggggccttgaggaatttttctgggctcttgaagcaacgcataaacctaagagcagatctgttgatacatctggccaagcagcgt  
atatgattgaaaaatgcatatagatcaagtaggtcagcaatcgctccttcagtaagtaaggtaggagcacagaaatttctcggaatgatgggct  
gcaagctttgagcttacatgtaatggaaagagcagcaactgcgacaacagaaacagggattttgagtagtgcgaaagtctgataagcgtc  
tgtacaaaatattccaagcgacaagagcgtggaaggagaaactaaaaatgaatcattagtaaaaaataaaaaatagttcatacagttcagtg  
tttagcaacttgatcataaaagtaggagtggaacacgaaaatcaaagcacagaagctccaaaatcattctttctaaaactaacacctttc  
gttttcatcatcaatgatctaccaagttgttagctaaagaaggcgacaaaaaattacctggacatgagcatcagcatccaaaccagggtgttta  
agttggaagtgaacaagcagtatctcacgaagttcttagctgtatcctctattttacaggcaacaacaagcatgctgtagcacattcaatgaga  
ggaagttctgcagaggataaaatagctgaattcgagtgaataatcatagcaagaccagtggttcttacaggactatagaaatgcagcaaat  
agctcgataaaatattacttacaactttagacttttactcatttctgaaatccaattgaaggcttgcattctgaaaggcattttctttgggtcgcgag  
actgcattatccgagtaatttctttcagagtaaaaaggtcgagacagctgataagacatggttttctctgacattctcataggaagcac  
caatgtaaggaaagcaggtgttttataaccgttgtgccaagtaagccagaatcagatagccgctcgaaaatagaaatattaatattaat  
atgttgataaaatccctcgttgagcttaacgtcccttaaatgagaaaactcgctctttataccctagatgcagactgtggttgggaaggcagcgt  
tactggtttgcagaactcattcattgagaaaaagtaagtttaaatcgattcatattggtagctttataaagaaaattgacatttgaattgataagta  
tcaatttctgctacttttcatcgctgaaaaaagcagcttctggatgtccttttagctatgtttgtaattgaaattagagaaagcatgctctattca  
agttgaaacaaaacgcaaaaaaaggcgatttatttgcgtcctagcaatagttgagcgacaattaatccctcatgaatacaaaaactcctcag  
taagaggaataaaggctgcacagcagctttttgaacttttttttcttaagaagtagaaatgaaagacagaataagcttcggctaccttt  
cacatccaaaggtaaaaaagattgggtctcaatcgcaaacgatgatgaaacaacatgggcttcaattcagttgtttttaacagttttagtt  
aaagaatactgaggtaatgtttgtgaaatattcagattgggtcttttcttctatttaggtgtcttggaaatgcgctttgttacttctgcttagata  
tagctttataaaagcttatatttttagttgatgtgtaccaacacctaacttttccattttctgcaaaatgtggaagacaaaaggaatttatt  
tatttattctgtattcttttctggttttctcattctagcaatcgctcctcagtaactaacggtgaaaagctgaaattgagcgataaacagcagatg  
gagaacaaaactcccgtagtcatttggcatggcttgggtgattcataatagcatttgccttaatagattgttaaacgtgtggaggaatcacag  
gtgcagccgtctttgtcgtccacataggtgattcaggattcagtgatctgaaggctggatataattgaaatgttcaagagcaacttgacgggtttg  
cgcaaacgtctaccatagaagaactgaagtaacgggttctatggcattggtgtcagtaaggagggcttttctcgtggttacttgagacctgc  
gattttgttaaaatccgcacttacttactgttggttctctcataatggagttttaatttccaggatgctctgcaacgaatttcttctgcaagcag  
ccagtaagtctgttctggcactgggtgcttggaaattctgggttcaggcccacattgtgcaggctcaatactcctgacagaaaaggactttgaaa  
atatttagcgaacagtcgatttctagcaaggattaataatgagattgatcatgaggacatgagttgtacaaaaaaaatggagcaactagac  
aaactcgtgtaataactttgctacagacacaatcattaccctccggaatcttgccttttgatgggaagatgaggatacaggtgcacctgttc  
ctatgaaagagcatttggctacttgaatgacgttttaggattgagaacgctcgatgaacaagacaaaatcactagcctcatctaccaggattcc  
atctggagctgtcggataaagagatggatgacttaattcggatatacttaaaagatgcaaaaacagcgttggaaaagcaagaaataatgagtac  
acattccaaagaaaaacttcttttctcgttatatttgatgactgtaacgtgtaacgtgttcttagtaaaaatctagctccaagatgga  
aaacaatgttcagaaacgaagtttttggaaagtgaaaatgatagcatcaatattttaggacttatcgacggaaaaggactctccttccaaatc  
gctagcaacggaactgttatgaccgtgttttctacttttctatcatgtggatgattttgaaaagcattatggaattgtttcactcattcctcaa  
ataataggtataatgtaccttacagtgatggtagcaaatcgagaactagatacgttcatgacgttccgggggtcaagttacgaacgaggcactcaa  
ctacgttattaagaatatagtaaaagatcctcgccctcagatatacataggtgtagggatggtatgcttagcattctcagtttatgggtt  
atttgtctcttatatgattcgtgggctgacaaataccgaaaggaagaatggagtcacatcagttctttggcaaatggggatttactgtgtgtt  
atcctttgtgtatgcttagcgttacttttgcattatcattcgctttcacaggtgatagttggattttgacaggtcttgatttggctacatgtgtt  
gctggttacgggtcagttgcgtgttttaggcatgaccaagtgattttggagttcccataattgagtggtttacatcaaagacactattattcata  
ccaaagacaatcacagacgggaatggttaacaagctgcaacagatgaacaaaagcgaatcactggaatcacgaatattgtatgctgattga  
aacgtttgggtatttattaaggcaagaatagcaattgatgcttatagatccgtaaaactgttggcgtgtatagtagcataagcgaagcttttc  
ttatatctttttccaaaaaacccgaaacctcaaaaaaaacaaaaaataatagatcataactactataaataactgtttattatcatcttc  
gtaagaaggttgcaaaaatcagattccgtctgggggaatcgaaaccccgccatcggtgagagcagatgaatcctagccactggaccaagacg  
gattgttaggatattagaaagtattactactaataaagaaaaataaaggaagctgtaaaataaaatttttttttaatacaacaggaatgaa  
cgagtattataagtaggtttccaatctcaaacgaatagcacttaacttttagtctctgttctgaaaccagcgtccaccgcttttccaggactc



gtgcatctgtctgactgattccatagcatcaaatttaaagtagcgaataacgtagctgagttaactggactttgtacttttagacgaagaagttaac  
gaacctagatgttacctggcattgagccaaatggcggctcttagccaccgtagctcgagctagctcggctttgttagatttaaactgcgaaacatc  
atagaagagcaactttcggaatgcgaaaagatataacgcacagtaacatcgcgttaaaaagcaataaacggaagaatcaatcatcatgg  
ttcacgggtcagtaagcccttagatcgaagattagaatgtcaattgtttgagatgttgagtctgtttatttccctgggtcctaatattttata  
gataactttgcgctactcttattgtcttgcattcgttgatgttctttttcttctgatcctcattcctaatggattatctgtttctgtacgattt  
agcctttcttgatctcttgccttactgttttaacttctattgcaattttcttcttactgtttactaaggaactaaagcgcgctcggtaattacaaata  
tgggttactccacgaaatccattaacattgccggaaaagttaaccggaataacaatgtttcttgcattatgtaaaaaagtgtagaagatgcacc  
ccaaaaatcgctatggaagccgattcaaaacctgcttttccatattgtttttgctaattagcgcgctgattcgcacgaggtgctggattcgg  
aggtttatagttgaattcttcaaaatttcatctaaactcccattatccctcaattcaacagaaagcactaactcccggtaattgggttcgctg  
ctttgtcgaacttttgcggttttcttccattatcttttactgatacaggtgacaaatcttaggtgattcagctttttgtttatctgtatttct  
gttgcctttctattaaacggactcctcatcttctttagcctgaatgatcgaagagctcattgactagccatcattcattctttttttttcttt  
ggtagtccccttttatttctctgttctcgttctctagtcgcacaccatcatcgtgaaagccgtcaaaaaacgctcgtcctgtcattccagcataa  
aaattgtatagatcgtttgtgacctatacattatctgtttcaggtttctaaattgatttaattcgtttctgttagttttttgtttcgtgg  
ctcttttcttttctgtttcttttctttaaattcttaattaaaagtatcagggttcttatttagataacttctaccactaatattcctactcgtt  
gtatcaatatggtttatgactcttctgctcttatcaaaaatcattgtctcatgcacctcaaaagattccgttcttgggaagcgtccacatgaa  
ggttcccctgtatcagacaaaaaagacttaaacctctgatcaccctccccttcttcttcttgggctttaaaggactctcgtcttctccat  
cttctgcttataaaaagaaaagttagtcatacccctcctagtagatctaattcgcctcccacaccgcttccgtaattcctcttcttcttctc  
tcttcaacctgtacccgaacaaaaatattctcacgtaaaaaataatcaatctttgtcgatactcttctcaaacagcttctcccgtgacactg  
aaaatgatacatttaactctcgtgcttccgattcgcgtccaaagctgatgcacagtttacaccttctccacaaactcgatactcctgcttctg  
accactcttaaatcctgcttactatgctccttaccgtcaaccggcggaccgctttgggtagaaggtctcgagttctaccgagcttgacatccag  
ctacgacttgcggatgtatttttattatgcccattggtcaaccttatgtttgtttcatcgagattctttcttgcgtctcgtcgagctcagcgccttct  
cccatcctagtagtactatctatgtgtgctgtagctgtacgcttctggcaaacgacaagtagatagaaattcccttccaacaggttttagtaaagc  
ttctcaattgcccattgccaattttgatagattagatctcgtctacgtggcttgccttattatgctttcgatcatcagttgtgctgatgacaagattgg  
atgtatgcaggatggccattcgcagctgttgccttacaccctagtaaaagtttgatcttcttattatgatctccagacagccctatgccttgc  
gaaattcgaggccagctggttgcctctcttttgggactgctttatgctcgaccgttaaacctttatattgtaatacacaattttgaaattggaa  
gatattcatgtactttgcctatgctgaaagctgtttatgtacaataactcgtgctgtgacagagaccataatggaagacctggtaacactgatt  
tgctaatccacaacgcttgccaattcacagctccttgacttaatacagcatgccccaaataacatgggagtagcttataatgattcgtatg  
gtatctatctggggaagagctcgtgctgttctgaaggcttatggctcaacaagcagaccagctcgcgtcctgttggcatacatcgtgttctttca  
acctttagaccaggaattatacgaatgggagaaaagtcttctcaaggctacgttatacacgccaatcttactttcttcatatgatgggacag  
ggaggccatttgcagatgcatctgattatctcaagtaattgtatattaccgatacgcgcttccgtgtcacctttgtttcatcgactgta  
ccatcgctcctcagctcattgaaaaacagctcagtgcttctggcaacttttgtgcaaatgccattgcaagaatcctcaagattcgtcgaactatc  
cattccttagcagcaccatttacggcatattctgcctatatggcaggaaccgttatgctttccatgtctcgaaccccgacaattcttcaagcaa  
caactgcaacatccaatttgcacaaaagtgaagcgcatttgcattataaagcattattggcaacgattgctaagatgccaatgccctggaaa  
gtctatccaagcttgatgccgaagctccgtcacttctactgccaatactccgggttggtatgttctccaagacaggggagcttctggcgtcctt  
tcaagcaatgttctgttaaaccgttcccttgcctgcaaatattccatacaatggcgcatctggttcagcaaagagtagtacattgacagaccttg  
cttacgatacaaaaattcagggccgctccctgtttctgggtagctgagtggtacacaaagcgtttgaccttggaaaatcgagtgctccttgt  
gtccaacaggggtgattggtcgtccaccagtctcgccttctacatctaattgctaccgcttaattgattaggagtagtcgagaaaagccga  
tatagatcctgattgggtcgtggtatcgttgcgattggtcaaaaatccggttgatgagcttcttaataagcctttacagcttgattcatc  
ggatgaacaggaaaaaatgcatagacattagtcgccaataatggcgtgtaaacctttggaattacggtatgtaatgggaatctgctgtgtttat  
tctcatgtacacttgctgtttccaggaaggcatatggttctgtgtattatcctaatacttctttgtattatccctctttttggacggactttgctt  
ggaaaggtccgtatgtatgctagttatgttgatagaactaaggctcatgaagtactgtataatgtttatacgtaaatgtagaataatata  
tcaataatgaatcccttactcagtaacatggtcgaagaacaggatagaaacaaccttctactatacacaagaattccagcttatcggaa  
gaagttgatcaaaaggcttattcaaaacttctaaaaatacataaaaaagtagatattctgtttctttgataatcagtaaacgtaaaacaatc  
aatctgtttgtttgtgaaacgatctcgcgaaaagtaacataaaagttcatacaaacggccgtagtactcagtaatttataaatcttattgaat  
tttaacaaaaaacatacgaatggattacaacatccaatgaaagtaacaaggaattgggtcagtgacatcagtagcttaatagaaccaatg  
agaacaaataactgaaaatgctgtttaacttcttatacaaaaagtaacaacggagactcaatgaaatattcattgggtaatagaattaga  
gttgaacctgaaagaaacgggtcgtgaccaatcacttttaactggtggggttccgttaacgacacaatcgtggagtagtgactgttcttctac  
acggaattgaattcatatataaagggaatgggtcacgaaatccgtcaactccccctctcttcttactttaaacttccaacaggacataa

acaagaataaacggtttgttgacgatttttctggaaactttagctttaataaacataaaccttttaaaactggttctctttttagtagattttgaa  
gaaacggtgattaaagacatagaagatattgcatttgaagaagtaacgttaataatattggacccccctgtttaataatcaaaatggct  
tctactcaaacctactgctcccgtcagccccaatcttttgcgagcaaaagaactcccatttcttggctgacttcttatgggtgggtgtgctgct  
gcatctccaagactgctgctgccccatcgagcgtgtcaagcttttaatacaaaaccaagatgaaatgattcgtgctgctgcttttctaccgct  
acgccgtattggtagtgctcaacgctaccgtgacgagggtattgtctctctgagaggtaaacactgctaatgttttgcgttacttcct  
accaagctttgaactttgcttcaaggataagtcaaggccatgttcggctacaagaaggacagagatggttatgctaagtgattttcggtaac  
ttggcttctgggtgctgctgggtgctacttcctttttgttctattctttggactatgctgctactcgtttggctaagtcgccaagtctgccaaga  
aagggtggtagcgccaattcaacgggtttgggtgatgtaccgcaagactgttccagtgatgggtgtccgtggcttgaccgtggttcggtcctcc  
gttctgtgatcattgtttaccgtgggttgactttggatgtatgatacctgaaagccatcgtttgggtggacccttggaaagtaacatcttgacct  
ctttctgctcgggttgctgtaactattggatctggatgttcttctacctttggataaccgtcctgctgctatgatgatgacctctggtgaaagcctt  
aagtacagctcttctcgatgctcgtcaaatcttctgtaggaaggtcctcgttctttctcagagggtgctgtgaacattctcgtggtgtt  
gctgctgctggtgtccttccatctacgatcaagctcagctcttgatgttcggcaagaagctttaatagcttgaaaagcctagctctatatatacgg  
aacttctacttttgcctttacgaattccctttcacttttcaaaagcttctgctgacgttggctgtatcctgtttataggaagaattggagtgccata  
aacctagtgttcaaaaaatgcttactgagctgtactttgtaaagcaaaaaagcttaatactgtacaagctcactcacacatctttgtttca  
ttgatccttacttctttttcattatagtccttagacagaagatgattcaaggatcatctattggaaaacctatctcttcaaaagattctttg  
tgttacagctcatgaatgaatgttctcagctataaaaaatctgattgggtgaaataaagaagaatctgtagctagcagctcaatgatgaacgc  
ttgtagtagttgagcaatgtagtttctgatttaatagaagaagaaactaatgttagcatgtatgatttttagctgtcatagtggtgagatttct  
acttctcttattgtttattgagctctcatctgattttgatgatgaagagaaggagcatatgaagagatcttaatgagtggtgtctgtcattttagt  
taaataagtagcaaggtctgtcttaccatcaactcgggtgtccgtaataaactttgaattttggatcaacgctcattaatcgtcgtgctgttac  
atgaagaattccttcatagattaagtagtctggtggtgttcttctcatattcaattttggagtaagatattgatcttcagcagagttgctgtt  
ttcccttaagatcttcttctcttctgtttatactatattctactgttttaactccttcaacgggtttttataacttcatatacacaaaatgagttct  
taciaaagacttcctatgtaacttattttcactgattttctgactaaatttgcgagatgctcccatttagctctacaaaacaagaagtcaagtgc  
atgagcgtgctgaaagccaagaagagccattttgttctttatcacctgggactggagagttttatgacctgagccctctatccgggtcgaa  
ttatccaaaaaggagattacagtttccaggctacgacttgaagcaaaacttacgctcaatctatgcaaaccgggtgacaagcaaccttcgaa  
ttacaccttgcaggagacattccttctgctgaatctattgggtgttttttagtagatgaacgaaagcgtatgtttccataggtgagggatctagcga  
gccctattttcgcggtgaaactgattatggaattggaaaatgggtctcgttgcctactctgatgaccttcgaatgagatctattattagctttag  
ttgcaaccgtgacccttattgttctcatctattttctacgttgcgaatgtattagactgtgtcttttctttgagtggaacgattcatgcatgtcca  
acagtgaaagaagaggctactttgagcccttaccgtcttttaactcttctgtaccgttgcctttctgcttactttgtaggtggatgcatgtacaac  
cgggctattttcaatgctcgtggtttacgacaaatacgaatattagattatggcattcattgtttagccttatcgttgatgtcctcaaccctcttt  
tttctcatcaagtaacatacttttaggatttctccattatagctttgtcttctcgttctgtttcaattttagaaaaccaagcgggaattcgcttag  
gtgaagggacagcgaacaattggacgacgcttaatagacgacattgacacgaacacttagttcattctttacctatccaactctctactttcta  
atctccactgtcttctaccttacgagtagtacttttactctcatgggtggactccattacaataaggatctttgcaaaatacatctgtttgtatata  
attgtgagctcggccaacttaagttagcttattatattgacccattacccaatttttattgttttctaaaacaagtgacatttagattcatg  
aattctgagataaactgattcagaattatcgctgggtcgagcattgttgatgactggaaggactgattaggatcaaccttgccgtctgttctcagg  
agttgttcggcatctcactagaaagttatccagaacggaaaggttattgttagacatgctgttattagcgtatagcagtagatccgatctc  
ccgtatcttctctaaatgagcatcactgagagtaagtaaaacgaaggatgatacactttccagcgtgtgatgataatttagcactagaaaag  
ggcattaaaatcaacgaattcctcattgggaactccatattctttgtaaggtatgtcattcaatttgagttataaacggttgaacggtgccgttatt  
cactgaaggggttatgctcctcgaagggtataaaagctggttggggttttctgaggaattttatgataatcaggatattttggagatcggaaa  
gtttctgaacaacatgtttctttttgttctcgttcagaaagctccaaggccattgtcagcttcttgcactcatcaaaaccggaattagtt  
gtcaggttagccaatcgttcgaaatgtctttaaggaattccgccaactgtcaactgaacaagcaaacctttattctttgtaacaatgtagcgt  
cataagggtgacctggtgtaaatccacaaaaaacgtatgtagtagtaacgattgtggctttgcgtcaaggcattcgttaacaattcagatt  
ttgatgcaacaatagccgaatcaaacattacaagccaagatgaatgacactttgtcgttcggatgcttttagagcttgattgacagctgcca  
gctccaagtaatgaagtagaggacgatacaagagcattcgaaagtaataaagtcatcataagactatacatgtgacgattctcgggtgctg  
accgggctgctcagcttgaagcttcttgaagggtgtagaatccatcattgctgttccagttcaataattataaaaataggaacggtagct  
ttgctggcaatcctatgccaaccaagtataatttagtaaggatgaggtagtaattttgtaaagtcgaataccatgaaataaaaagtcttagct  
cgggtttgataaccttgaaggaattgaattgagagatctttgggcaaatattgatcgtatgtcttcatcagaaccccaagagggaaaccaaaagag  
gtagcgtaatcgggtcatgacaatacaagccaaaataactcgtcggagcttccattgtcagagtgaaaccagcagtgatattctatg  
caaaccaagtttaagagaatgaagccaatttgagataataaacctgcgttatttcagacgacaatagcgataattacttataagtag

aagacattgtacgtgtccaaggagtaatcgtcaatagaatcaactacacgttccgcataaaagctgtatTTTTtagcatttcttgcgtctccaaa  
ttagtgcgatcactttgtagagaatggtaataaccattgcataataaagcacaataatgccccaaaattggattgataatcgccactgtaaag  
caagtttattctattgaatataacactaggggaatcgtagaatagaacacctgttatgttaagagagcagcttgataactgaacagctatttcc  
atcggagggaagcggcaccttctctggggtcaatactgttaccagaatctaaactaaaacgcggacagaaaagtatagaatcgagattccggac  
ttgagtaatctgcctgtatatctttacaacgaaaggataagcggatagggatttttctcgaattaccgggtaggcatttaagatgatg  
taggaagacaaaaacagaggtactgcctcgaataacgtctcccgggtattaatcagtatacaaaccttggttctatcgtagttgaaacat  
gagacgtttatgattttctccgtgcttagttcgttgcctgaaacttctgttctcgaagaataaaaaagttcggagagctttagataaat  
ctacggaagaatgctttctcaggagattctcaaggtatctgatacgtgattcaagtttcaagatattcgggagaatgcgaggattacgagtag  
aaggcattttaaaagtacattcaactctccaagcctacaattttgacggacgcgatgccgtcgcactttaccttttctcctgcatttatcgcatg  
cacgagtaacgcctccgtctaggatcacattagcaccttcaagagaatggaatcctggctatgtcggcagcttctcctttgcatatttaa  
cgaatagcaaatgatagaagaaggtattatgtgaagaataataaataagaataataataattatagaggacgttaatccaaaagaa  
ggtagccgaaagggaagatgcaatcaacggtttatgtaaaggaacaaaaagatagaataaaagggaataataatctaaaaactgctccaa  
caatacgttacaatcgcaagttatgagtaaattagttgtttggtaagcttgcgacgacctgtcgaacgatcacaagaacaaacgattaa  
gaagtatgaaaaagagactattatctatataaaagggtgagagatacatacagctatttgatatacaaaaaccggtagaatgtgcaatgct  
caagaaacgatattcagttcaataattcccgttaataacttaaggatccaaaaataaattctatcaatattgtaatgctttatagctttaaat  
tgcaaatctgcccagatatagcagtaattcgggtgttggtagttctagatccctgtcccagtaactaaaggtagcctttttataaagtg  
agacaagcgaacattaaggctcgttatatttagcaataaacaagcgaacggattgacctactagcagggtgaagaagagggtttttaataa  
cttatagtttgagagaaaaacaaaaaaataaaaaaaacagatacattattcagggtatcatcaaatctcctgtgattaaagaggact  
agtaccggtcgaccttgaaagatgtcggtagacgagaacgcgggaatccaacaaacagggtatgtcgcaattctattctatatttacaac  
tctgtaaagaggaatccaagtcaattcagaggtgtctgtcaaatctttctatctcttggattattgtctgaaacaggaatgatatacaaaa  
gcataaaaccaacgaatactccaaactagaattgtaattacctttgataattcgtaaaaataaacttttttaaaagcgtcattgaaaaata  
gtccaattctggttgatgaagccttacacatgaaggccgcagagacattctattgactacccaagcagaacagtaaacaaaccttttctg  
aagtttgaccatttagaggcttccaggattacagcttccaattgattctcaagtaaaaggataaaggataatcctttcacctgttcatgtaccg  
gttaccactatcctggcatcaagttccgattgaaaagaataaaagaacgttccctaccgctttagaggagttgaaacgtattcgaaaag  
aagacccaaattttgttttctacttaattgactcaagattagcgcctcttggaaactatggatacatacagttgatttttaagaaagctg  
gattggaggacagtggtgaagttgcatcgacatggagcccattcatccaaatctcgaaccggtagcggcaatgaagattcgttcgaaaatgg  
ctttatgaggatcgtttatcgttcaggctacctctctatttttagcgaaggaattcggccttcaaaaaggaaaattctccttctgttccgacgca  
ttgaccttgtgttaggagcttatcaggttctgaccagaaattagtcattttatgaaaaatgcaagaaaaaggaaattcagcttcccaattgc  
ctgtattccgacttctgggaacaaaatctactagaaaacgacccccaacagatgcttctcattcctcccctgcttgttacgaatacatttgtttg  
tcaaaagactatgttgaatacggaaatgcttctgctagtttttattggcattttacatgaacgaactcatctatcatcgagcttgaaattg  
ttatgaaatcttcatcttctgaaaaagcttcaagacatggaattgtttcttggggcaaacgatgaattgcagaattgttgaaaacct  
gctcgtgcagcacagaaaattaatattactgagacaactatcttatttaagaaaattgtcattttgagcagcagatttttgatactgctttcc  
taaatcttttaagtgcttccaattccagcatttaagcttcaaatctcggagaagctagattttcaacgctgacggtaattaccataactaat  
acccttattattaccctgaggatactcaaggaatacttcaattgttattctcttcaacctctcttgataaagtggaatcttatgtttacgtttt  
taattatcttttctgctccactttatgtcgaagtttcaatttaataagacttctgaataaacaagaaaattcctgcttttaacattcattcat  
ataattgacagtaaacgtcctgtcaacttgccttttaaaagaataaagtaagcaatgttcttctgatacattatcagatcaattcgttagat  
aaaatcagaatcccctaccataactacggaatgaagtttctgaacgtgtcttttcaaaccggttggtctaattttggcaactttattttcttg  
atcaaagcttttacaagcaaatcatggaagaaaaaggtaagattgtttagaagtggtatccagggaatgtcgcaattttccataggttagc  
ctggttccgtcgtttcccagcagattcattagctatctactcaattaacaaaactaacagaattagacaagatgcaagaataaagaaagt  
gtcccttaaaagcagacagaatctactattgatccggatgctgaagtaaccatagatatcagatttctgaccgtacaccaacctgtcttttctt  
gccacttctgagtagatacatgatgttcggcaagtaacttggagctgttctggtcctcactgaacacttgcttccacctgtcatgaaaacgaa  
aattacaacctttgctgaactcatgagattcaacttttagagtcactgcaaaaatccgaacactgtttttgacgtggtattggaccataca  
cagaaaggatgcaaggttcatatcttcaactcttagattttggacagaagcaatagaataaaaaagcacaattttggaattcgtactgg  
ttttgcatgtttctgaaatgaacaacctactgaatcctatcagatggatgctgccaatcatcaattcaagttttccatcctaaacaaagatt  
tttggcctgataatacacaccttttcttctttagaaaaattactatctccatgctacccttagaccattctttagcatacctgcttctggtct  
ttttcttctgcttggaaatccagttccaccgaatcgcctatgcaaggacatctttgtacttaagtgtcacgacttttagagggacaactttacat  
atcatttctcatgttgaggatattttgcaacaaatccacaacacgcgatttgatccgacctccaaggtgatctacgtagtcattctctatctc  
actactttgcaactatctcctcttcaagaaaacctgaagctttacttgatataatagggcagaagatcaacttgctttgtagaattagcg

gttcaattcctcaagctccttgattacaatgccgctcaaaatataaccaactgaaaaaacccaagaagcacaacttaatccatatattgaaa  
atcaaggaaatctgctgattggaatgaagagatccaatccgctcgagaaatggctcatgaaagtatccaagatcgtgtcttactgagcgatta  
ttaatgaaaacattacaagatttactgaagttccgttcaaggagccattgaaattgtaaaggaaacattccttcttaaccccttgagccag  
aaggttctgcatgtatgtcataacaatatatcttttcttttgagctgatagcgttggcattcaaaaaacatggaggggatgctgctcctatt  
acgctgtcgggaaagatgctaccagattcgttataaatacaattggatgtagtaaacctttctccttggaaacatgcatcgtggactatgctgg  
tcacagaatagttgctcaacaattatcctggaatctttaaacagctggaattaggaagttctcagcttatctatggaagcgtcgagggtgagga  
aaagttcgttttgattcatcattggagcctgagttattgaaactgctaataccttacaataaaaaacataactataaagatcaggatggtagt  
atcattcccttatacactagtttagataccaaaggcttggtaggtcagatggaagaaaatacgtgatggatctttatagcctatttctcctgatctt  
ggattttgaatcgattgaacgaaacagttctggcttatattctgactatccccatcggtagtgcaatttctcctgagctaatacagctttttgg  
gaaaactccttaaatgaagagacagaagaaaaagtaggatccttgaagataaagataactgaacaataaaaaagacagtttgaatcaa  
aatggtaccggagttccagaagcttccaaatcccataaagacaaagaaaaagttgcacaggaagattgcctttcaatcctaattgttttcat  
cctgcataaaatatcccgaaaacgaagaaggtgctcacaagatgatattttctcgaagagttccagctatcttagtgaactgtgata  
cctcagtttattgattccatgcaatgattttctttatgccgattgacggcattgccctcccgtgattacatcgtaacggaatcaataaagg  
tatcttggggatattgtatgtgattttagataagatccagaaaacaccgctatgatacgtctttaccagtgaaattttgctgcatctgcaa  
acatctaattcgagcttatataccaagactccaagttgctgataagccatgctgatacctcttttaattgtttacttgcgaaagcgaagatga  
tcagtcatttctttttgagagggatcagtttcaaatcttctgaaacctgcaaatgcttgcataatgctgcaaaaattggatcagaag  
ctttaatgaaggagtcacaatcaagatttggtataaaatccccgagagttgtcaaagaagtaaccaaatccttaattcgcctaattgtct  
gaaactggggattcagtttagcatgcaaaagactatgttagtaagggagaaaatacagaagctcatgatcaaatatctgatccaaaaagtaaaag  
aaacaagaaaaagaaaaagagaagaaggccaagcaaatggttattcagaacgggtaactcatttataaattattgcccaagacattcta  
aatctagcgcagttgtaagagcactatcccttatagtgcttagcacaggaatcactagatgcttgaagtgcttgccttaagaaaacaaa  
gacctatgtatgacttttaaatgaatcccttctcttcacgaacaaatatatggggctttcatcctgagattgctcgtgcttattgtcagttagcca  
tgatatgcatcagtttagtataaaagaagagcttcttattagggaggaaagctttagtggtgctgcaacgaatcctcggttttgattcctcgg  
aaaccattttagcgtatctcaacttagcgtttagaattttctataatcggatctcaagctttagtatatagtcagatgattacaactgtggc  
acatgggtttggaactgatcaccgaatgataaacctcatataccaatattggcttaattgctcgcctcaatgaaattattccgaaagtaaaac  
ttgcatcaagtgggccttgattatgccagaaatccagggcaagacgagtagcaccgctgactcactttgagtagtctcaagccttgccatta  
acaaaggacctctgtaggcatcccaggaagctcgtgagcttacaatctttagggaaaactgggtccgaacataatgccacgaaagaag  
ctgaacattggctatccaacttatagctttagctgtaagcaagaaaaagttctcgacaataggataagatgtgctgttgcgtgtaaaatactaa  
ttaattcaaaatgctccttccatttacttctgtagtatacgcctttcaataaacaatatgagagcaaatcaatgaaagttccgtttta  
ttacagctaattgatgatatactcaattcaacctatgaaaacacaaaaaaatacataaaaaggaaatataagaatatacaaaataacatga  
gtaagaaaaaaaattttaaatagtaaccttcaatagtagaaacctcaattattgaacattgaaaaatccaaaccatacttcaaacatatt  
cggattgtatacattagcagcgagaaatccaaatgtagctcatcgttaaacggatacatggacagagtttggtccaagatgggggttactccag  
caactaatcattgcttgaatccattcaggtcattaggagctttccctcgcgtgattcagcctgtttgttgcattccagaaagctgttattca  
aagaatctagatattcgtgattgaaatggaggttgcctccagaaaaacgtcttccgtaccagctttagattgactaggatttggtgtaaaagaag  
gtggcgttgggactgattcattgtaaggaacgggtgactcattagttgagcaacatctgtgtaacatcaaaaaggggtgataaagaccttgcca  
tttgttagccttctggacagcaagttccgctgttgaattatactatccaatgattaaagtaacactaaattgaaagtaaccagccaatctgcc  
cacacagcaaaaaagcatctttgacggtaatcaagcagttatctcctctgaggaagaagcaagtgagctttcagaattccgataaata  
aaatcagggttgagtgatgatgatacatagcaaccttaagggaaaactctgtccatgaagtgatactgaaaataagtaggtaatcgcacg  
agcaccctgaatgcaagagcttgggaatccatagattgcttaactcctctgtgagtagcattttgaaagttttgttaatgcgtgctgatgaa  
gaagaataagagctgataataacctccagctaacaaatgactcagtgagggcactaaatgtgaaaaggagactgggaggatgctttccggaa  
ccttaaacaccattcatgattccaagtccaagccttaattttctttaaagtcattttagtgcatttcatgccagctactgagtagtaactggc  
gcaagatacgtccataaactgcattaatctaacgacacattcaagaaaattatacttttaagttcatcgttcttgggttcttacagggtgaa  
atcataaatcagtaaaacggtattatctgatcaatatcttcatcttgaatgctagtgcttctgacgtgaaagaaaaagtcgatccataga  
ataaatcagccaaaagacacgagcctttcctcagcatcttcttataatacaccacatggcactgttacgatgaagaccaagggtttagcaac  
tctaataacaacaccaagcttagccatgcagaattaggttgacaaatagcagaaaaaatatagaggaaagaaagataccaataatgtatc  
aaaactcatgaatctgtaacctccaatttaacatctaaaacattcatataaagagctttagctcgttaaggttacattcattttaccagttccta  
tacatcctagacagagtacactacatacaaaagcgtagttgtaacatctagacaaccttggcgtttgtaccaatcaggagaaccaaaccctt  
tatcaaaaacttttctgtgaaaattggaaattcactataaacgtattaaaataagcatcgatagggcttgagcaactcaggaggtgtagctc  
ttctcggttcgcgtgatattatcttctgttctggctagacaaccgattttgcaagcgataagtttcaagagcttttcagaagcaatacctga

agcgaattggtcgcatgttgaagaatggaaagggtgaagaggcaccgatgacttttgattaccaataggagtagttattagcattcccatttt  
tcatttagaaaagctaaatcatcagatgcgactcatcagaggaagaatctgctttataactttctcagcctcttctgcatcagcattgggattgg  
gacagactcgtttcgggagtgaatttgaatgactgatcgtaaagttgattccatttctccagtctagagaccaaagacttaacataaattgc  
ttttgacctgttcttctttggcctagcagtgtagatacaagaacattgtgattaagacagtttctgaggtaggttttccatcgagcgaatt  
ttcgtttgcgacacaaatcgatgcacgattaattctcttttttagctgttttcttctgctgaggatttctgccttctggatagccatttcttttct  
ggtatacggaaacagtgagaatgacaaaaatactcccgatttgaagatttagtaatttaggaatagaatcaagtagtcttaactctggcct  
gcaattcagacacgcaacgcttgaattcaaaaaacattttaaattttgatgtcccaatataaagaaatagagcaattattcaatttcta  
ttttcaattaacataaaaagaccataaaactcaataaaagaggaaattagcctcttctacatatcaagttggttattataaaagcgttgg  
tagaaatttagatcttttagtagccacaggaaggattgaaactggagaggtgcaaggtgatattaagagagattcgggtgtaaaactacttttag  
attagatcgtaactcaaataataagtttgcctgattatcgatcaatcagaaatctgatctaaagttgaccacatatcaaaggcaaaaatg  
cttataaaggaagtaagaaattgtaaaaaagatcatataaggttagttttatctttataagctttttttatagtctatttaattaaaggga  
cccttgagtattcatcttgacttgaagcaaaacacttcaaattggttctttttatgccatgttgcataataaatgttcattcccacgaggg  
cttaatcccatttatacacggttcaattcatgcctagtgaagccaaaattgagagtgcgagttgtctataactacaataaaacgacttctgttc  
taagtttccaattcatcaattcattcatgactaaactttttttttcacagcatctgcatcagattaccctgttggtgatgataaactaatg  
cttgagagaacacaagacgatttaaattaaactcttcttactgatattgaacaaaaccgacagacatgactttattacgcttaatga  
attatgaattcgtacaattgtcaatcacgcataattcaatcccgtcatcatgctataatacagcagagctttctagctttgatttttcttttt  
tgggagcttggcagacgcttttggagttgctgcttgcgatgcccgtcgaggggctgctgactcagtcgctgcgaaactcgaagctcaggatt  
tgaagtaattatctttctcgtgtttgaggatggatagattatgggtaagcgaattatgtaatcggaacaatagaaacatcttctgaggg  
gaaggattagcatttgatttgcaggttccacggaatggagaactcttaagagctgagaattttcacgcacgtaaggagcagcgagtcggtaaa  
ttcgttacgtgaggaagggtataagaattagatacagaacatctgttgatggctactgtctatatcattatcaacgctgcttaagtaagttg  
aaaaataatcactactgttgaagaggttgaaggaatgaaccgaacgggaaatggcgtctgaagatgcagtactagcatcgtcagcaggg  
tggaaattgggctcatggacgttggagaatgcatacccgaatttattacctgcttcttctgtttctctgagacggagaagtaggattgaaggta  
acggcggcataggtgattctgggggattctgtttattgagggctcagcaggtgagtagcagcagatttcatggcttctgactctcagattg  
ggagggagagggcgcggaacagaataaggtctcgattttgatgaatcagctggcaacgcagctgactgttcaatggccaagcagcatgcttg  
ctgttaatttgggtataggatcagcagggaggttttcaaattgggaaacagcagcattgtatttttgaagctcgcgatagatcgtcca  
acctttccatagtaaaattcagcctcgagtcagagtagatgtatcaaaaagctggagacgcactcttgatccggttggcatatcgtgacgat  
tttgaatctgaaaagctccagatagtccttctgtttcggtaaccaatcaaaaagctcggtagttgatttgagattttagtaggaatggcaaa  
catactattgggtaaagattctcgattaattgatcgttcggaaaaaacgaaaagcttcttctgtgtgaatgaaggagagttcagatcgataatt  
tctttgttggagaagtgaagagtgcatagggactgaggtggagctagggccgacgaagtaaaaggcctccttatgaaattatgggttaag  
aggtgactctcgtccttcttctgtgtaggggtccatcagaacgtctgaaagaactctgttttaccggagaacatcatgctgactagcattc  
ggaactctcgtcagatccgacagatcatcaggtgggagagcgggtgtgttcttggcttctgattctcagatacttctatacaaaattgatcatatccat  
ggacccttatgcaaaggaccatgaggcatccatgttagtcataaaaaaaaatgaaaagaagaagcgatagaagcagagttcatgctt  
catcgattcaagtcgtgtttcacttacatcttgaagtttcttccaaaaggaaggattgaagaattcggggctaaaacagacatacaagaa  
aggatataaaaagacagagtttttagaaagcaaaactagcaaaagaacgtgagatttggagattttcaattctatatggttactgaaagaat  
gcgctctcaccttaggcgaaggccttagacaaaaaaacaaattggagcaagggaactagtaaaataaaaaaggattaaatatttgaataa  
taaatggcccaattttgtcaattaatgaagagtggtattcttcaaaaacgacttgttgaaggttttgaagaaatgtgtttcaaggagt  
gatcccacttggaaagaaaaataatgaacaaaagtatatatatcttctgggaactcttaacgtacggaagagcgtaaaacagacatt  
atgaccggcgaagcaactcttcttcttcaaaaattactaaagtcacttgatgggcttcaagaaagaatacacatagtgatccctcct  
tgctggcatgaaaaggtagatcggttactattctcgaagtcgctttcaggaaaaacacgcaaacggctaatgaaatgaacgagaatt  
gtacagatttctagtttggattattaataaaaaagaagatattggctgtttctttatagctatagaggagcagttagcaaatgagagggtat  
gcttttccctttgtatcttctcggacgaattttctaaataattatcctcaagattgtcttcttcaaaaaagagaagctgataatttctgat  
ttcgttattgtctgttttctcgtcaaaagactgaccatagaatttaccaaactttactagcagacgaatttgaaggataacacttaaggcatc  
cgaaaaccaaataaacaagaaagaatttaaaggactcagctatcctttgagtcgtaaaagtgctgaaacgaagatctatcctttgtccaa  
tacctcaaaactgaagcgtttgcgcatgatgaattcttactttaggtttccacgcttggaaaagcgttactgggttctttctcgtagttctg  
tcacagtttggtaggtatagtaattcgaagaagacacaaaagaccgaagaagtcattatcgttaagtacaaggatgaacaactgaagttgtt  
ttccgacaaccgagacttccaaagatcttattcaagcttctccagcgggttgcagagcttttctgttctcctgaaaaggcttattggagct  
gagggaaaacagctcaagatgcctcttctcagcaaaaagtgaggagcggatctgtattgattgaagccagttcctttagtctcgtta  
cagcagattgaagtgacagaacagacctggagaaggacatagttcctctcgttcaacagattgtcttcccctccttctgatgcgcttctattg

aagacgctcatgttcgtctcacagagactttgcttggtaggatgattcgtctcgatgctatagatgttcaggacgacctgatgcacgtatgaaacg  
aaaagaagcagttcgtatggaccctaaagttttctgcaaaaattagatgtagcaaaatctgactcttaaaggagttgaaataacattcctcagata  
tcatcgcatcaaaattgacaagaatttatgttcccaacaactgcgcattggtttggtttcaagacatccattctattccttttaagataaattgtt  
attccaacttctcaagcatctattacctttcaaaactttcaattgatctgttcttaaactcatttgtttactaaagcattcttttactacacactaa  
acggaaattacaactgcttcgacctctctatatgggaatcaagggtcattcatttactctttaccaccattgaatcctttcgtttcccttcaaaac  
actggaattttctcaatggtaagaactgaaagaagaagaataactaagagattatagaccgcatattcaattttcagagcttgttatcagctc  
tcttgtgacggtttgacttgtacctacattcacagacaattccctgctttattggataaaagaagaagggtatgcttttttatgtattcgtgga  
atttcttggttcgtactgcaaaagtgtactaccgtattttggaaatgcgcgagaattgggtgaacgtgctagctcccgtatgtttattacttagaaga  
actgtttcttaactatagatctctctttctgcaattttgatggctctacgattaatgtttggatccagttgaacaactttggatattatttaccctc  
attttaaagaagcacaacaaacaaacaaacaaacacacgtaatccttatgatagacaaatattgacctcctcctttcttaactgacctggaat  
ttcaactaaatactgtgcaaaattggatattctctacgccgtgcagcctgtaaattggtttatgattgctgtatggaaaattaaggatctgaacctg  
gcaactcttaattcttcttgaatcttcttcttctgattgtataaatggcttcttatttctgattgacctcaacaaactatgatcg  
cgattcgtttcaaaaactattacttggttctcaaatctgaaatccttttgactttctagaagtgaagaagaatgcgagaacccaatgta  
aaagaaaagatgttcattattcaaaaagcaaatgaaaactttgcagatacaaaagcttatattttcattgcttttaagccatgtaaaggcga  
gcgttatgaattcaattcaccgaatcagatgaattatgctattgtctacgaaatatctagcataaaaggaatcgttcatgtttgctgcggcagctct  
ataagaatacaagcacaataaagggtatgaagtggaggtgaaaaaaaaaaaaaggcgaactctaataatctgttttagagctgcaagttga  
ggcggaaaaattacgatgcttaaaaaattgaccttgaaggggacaagtctttctgctacgaccaagtctttgacaattgctaaatgcataat  
acacataatctcactattctcattcaacgcattagaaaacagttatttcaaaatgataatagacgagaggaagattattttcataaatgaagct  
ctaacaaaattcatcgacgatattttctcggttgggtgaacgcttgccaagtacaatttctctgattacttattccatcgtaatataaagcttt  
tgattttgagaatacagctcaataagctcattaagctcctaattgttatccacaagtgtctcaacagaaaaggaagttgcaagttataatatacat  
aattcaatataatggagatcaaaactctactaccgatttggttcaaaaaaagtttctcaatataatgcaattcaaatctcaaaaatggctttc  
atactagaaaacatgtagtaaatattgacagttttgtagatatctgtcagattcagttgctactggatgccgttcattactttctttataaaaac  
cgtcttactttcatagaccagttttctgcttgattcagctttttcattacttctctattgtctaaacgagaacaactccttctcacttctactgttt  
gttcgcttaacttgatcaagtaacctttattctccagtggtattcagacgtgcaaatatgtatgaattcctttttgttaacaaaaaagttact  
aaacggtcctaaagccatgaacacaatcagtggtttgggtgggataatccttggctataaatccttataaatcagattaaaaatgaaaaatca  
tgcttgatttctatgtatacaaaaggtaggtgtagactaaatcaaaaggaaatagtagcaatgcaaaaggaagacgaaaaagttactcagct  
gaaggttaaaatagttattttagtgaaaggtgaactgaatatctaggaggtgtaattgtaaaacaaaaaaaaaaaaaagaattaaaaatgcat  
ctattatttttttggcttatgcaatcttgcaaaaagcccaacacattgtcataatcgaagcggcattaagggtccttgatcatgtaattcttca  
tcagtaactaaacaataaccgtcagcttttaagtcatatacttagaagaaagcttaaaggtaccggacttgaataacgatagagaccaacatcat  
caaatattcaaggagctattaatatagtgaaggcaaaaaggaaaggagaacaaaaggaagtttgactcatatctttgaaaaaaa  
acgtgataaataatagtaactctatagccgacgcatgaagcttctatagcaaacataacttatggaattatacctgatgatagggttaa  
acaatcacagaaatagcctgagaataatacataaggaattcaagattgaagaaaaagccaacttctcatcatagatatacgtcagacaaca  
aaaggatacaaacattatacgtccttttagaaacattttgaaaggttagattatcgtctcaaatgagccctgctcactataatgatttcaa  
agaaaggctcagagagtaaaattcgatatcactgacagctccagctgtagtggggatagattgtaaaaacatcaatatacttgaaattccatt  
tgttgagccctgtggaccatttgactaaaaggcagcacaacatacagatggaattcagaaaatccttgttccctcagccagatagtatcc  
cacatacgaataatgtttattatgcttagttcgcgcataaaagacaattcatccaccgaaaactaaattgcataaagtctacacctccgctgg  
agatgcgcaacaagaggctcatctattcgtagcgtgagttcacgaagattataatttgcgatgaattcccgggtgagcatgaataatgtctt  
gaattccatcaacaatttgaaagacaccagtaagagtcggcttctatattttaggatagattcatgaagaagagaaacgtcataagtcata  
ggttcttatcatcagatattcagaaagaaagacttgaaaaatggagtcaaatcactataccttgacgtaaccgcttgcgggtgtcgt  
gaggcccaaacataaagatgcgttcaagaattctttgggtcacaggattttgataaagaggtataaaaggattgtacgaggaacatcaagga  
caatttggcgcaaatggctggtcgagaacagacggatcagagctactatgaaaattggcatcttttagcacttaaatattcatctttttctgt  
aaagttgaatctcgtcagaagcattacacggcaaatcctaacaatacttccagacgataggtcttaactgtgagggtataaccattccatgct  
aaagtccttaagcattaagatcaaccacgggagcatctagaattcgataaaatttttattcgagaaatagggcggttgcctccgcaactcca  
cttcaactgaacgtggagcagattgacgggaggaaactctgctaagtgaggatcgttctcagaaacgtagctcctgcttcttttaggaaaa  
acgattcagcttgaagatgtgggagtagacgatctagaggattacagacggacttcggagaaatcacgttagagagacccatgcatcatctgt  
ttgagaaaggtatttagcaatttgatgaaactcgttttcaataaccctccacagaagaactagatcagcaattggcgcatgaagaggag  
ggcttgacttaacctctgatttgatcgcgacgggggtgagacattcgggtagtcaaatcactctattagggtctgcatnaatgaatcgatttt  
gtaggtgagctcttcatgcttatgatgcgtactatgtttcggctcaacacctgcaatcgaatcagtagatgaaccaatgggtccattccagatac

cagaaagcgtgcgcaaagtggatgattttttgattgcgattccatagcgatatataattcgtacagaataaataatatacgatgtgctgaaagg  
gaaccgaaattaagtgacaatagtgggataaatcaatttaaaatgttgcgattaagaaatacttgaaggaatatacaatggcgcagtgca  
ggatagggaaaagattaatgattcaagggtagagactaaagatactccataaagatgaaaaagaagtcctgtgaagaaatgaagaaatgaca  
aaaagaatgagcgcgctgtcaaataggactgaagaattcgtgaaattcttcttaattattgcaaattagatactgcgtaccttttttgatg  
ttaagggagggttggcttggcatgtaacaacacatgcaatcgaccagacgacaattaggagccgaaatattgcctattaattttagaaagtacc  
ttttcttattagaaatcacgaaacctcaacgggttcaacagcttcttaaaaaacaagagatttgggtgattaggtagtagcgcacgtaggaatggt  
gtgtttgggtgtaaagtagatatataaaacaaagcaacttcttggcaaaaaaaaaaaaaaaaaaaaaaaaaaatagtatgcagacgtttaatta  
tatttatgggttttcttacttttttttttttttttttttttttttttttttttttttttttttttttttttttttttttttttttttttttt  
agcaaaaggaaatagaagtaagaaaaatacaaaagaagcaccgtatgtttgaaggatgaatgtcctgtcataatgcagcgtcgcggttttc  
aggtagcgcgattgtacttggcttttaataagaaactgttgaattcatagatagacataggttagcatccttgaacaaaataaaattcttttcaa  
cttattgttgcatctttagtctttccattcttctgttggagacagctccatcgactagtcattataagtagtatgatagtagtagaaaattgaat  
aaagcaaaaggacatagaataaaaaaaagttttttattcgtacatcaaaaggaaagcacatagcttagattcgcctcgttcaatactcacatta  
tctgtgaacagatctatacgttttctggagctagtcagcagagaaaaacaagaagtactataagaatagtaatttaaatatctgcttcacac  
cgcatgtcatgtcttcacaacgacttctaagtgcgcaagctcctaccagtggatccaagtgtcggtagccagatcaaatctcatctattga  
aaagtaagagtggtataggaagcatcgagatccagaacgaatgcacctgcttattctgcaggaagaggatgtgtatttcaagcatcttga  
atgagtgaaacaggctactaaatttttaaaagacgaatacaaaacaaacgaagggaacttttagaatttatgatcctaagagcttcttttcagg  
gaagcatccattcataagccttctgaggttatctccacaatacccatacagattataaaaccgcttcttggaaaatttacgattttgttcaa  
aagatttagttattgtagctaggaattgagctctgatattgttgagctattgcaactggtgagtttcaattctaaaacattacctgtcatcttgc  
tacgcgctcttagctaaaagttagtcttcaatatgtctcggagaacgagaaagtagtagaattacaggatcaacaatctcaaacatgtcttct  
aagtctgacgctcaagggccatgaatccatagaaaaattcatcactcaaggaaacatggcatacgcgcaaaaagactatgagtcagctgttg  
aaaagtagcagcaggtttaggaatctgaaaaatctatggtctgatagcttgaaaatcgaatattttatggctgtatggaaaatcacttt  
ccaagtagcgttgcgaatagccaagtttaggaaatgctgtagatccagacgaaggcgcagaaggcgaagaagatgaaaacaaacaaccgg  
aaactattggctcatttctcactggccaaaagatggaaaatcgctatcagctcctgagacaagtgaacaagcagatactcagctcgtcgc  
aagatagaaaagaagaggaggctcccagaggaacaagaacaagagcaagacgaggatgacttttagtgttgccttgggaagtattagattha  
actcgggttatgcaaaccaaagctatagaggaacccccgaatcgtcggatgaaaagctcgtctgagatattttgatttacttggtaggtat  
cgttagaaatagaaaacttctcagcagctgaagatttggaaatcgtcgttattggaagggtcaggtttcaaaagagggaataactttactta  
gcaagctcattataaactagcgttggctttagtctgctgatccaagcgcattccacaaggatcgcgctcgtgagcatgtggaatggcag  
ctgagatcctcaggtatttttgaacagcgaatacagaagaaaagataacaagggaaggaaagggaaggatgaaacaaccatggga  
tcaagcatcaatgattgcaagaaatgtgagtgattggagcagaaagctgatgatttaaacatggtgcaccttcttagaggaggccgtagc  
tacaagatgcatgaatcttctcttcttgggaacgatgaaacttagcctcgtcgtggcagacgattaaagaatgccaatgacttgggagg  
acttgtgaaacgcaaacgaccaagcaagaatctcaagcagccaacaagaggataaaaaataaaaagccaaaaacagaatcagaataaaaa  
actaaattgtgaacaaaaagaacccttctcacaacacttcttgttaattttgtgtgatagtcattcagatgatagagcagtgctgat  
gctgatgtcgataatgataactctcaatgtcttcttcttcttcttctccttgaaccttaaaaactctgtatctcagctagaattgttgttaa  
taatattatattacggttacgatttttcttagtaaaatattacgagtttctcgtacattctgtccttgttgcgggatagatcttttctactgcttttct  
atgacaaatactagtttagtcttcttctcgcaccttaactgtttacggaagttgtacgtgtctacgttaatttactactggcaagttcatg  
gatttaaccacagccaacgacttgaaggaattaatttcaattcttcttcttcttcttctgataaattatacggcaatcttcttaggaatatagaa  
aatggcgtttagaatcccatgtaccaattgtcaatgtggatgatagacagcgaagcttgaattcgagatttctgcagaagcgaagatga  
cggattagctcggcgcaacaattagctgtgtgtgctacgaagaaagatcttacttgtacggcactacccagcgggtggggcagaatggt  
gttctgaggtgcttgaacgctcaagacctcggatagctcaacgctcagaggcgtcgtcatgttccgcttggattagtgacagtttcaaacgt  
gtttcccagccatccggcaaatggaaggaacagacggcaatgaaggggagggtcgtgtcagaaattcatggcttgcggcttgtgatgagcg  
aattggcatcgtgaaccaacgaataactggcatggaatcgtctacagaagacgatagctcaaaacgctgtatctgataccggaaacctggg  
aggatgttcaactaaaagaagggttaaggttaggaaagaaagagaagaaaagggggttatgaatagtgactaacaacgtttagattgttgc  
attattgattggcagctgaaagattacagtgcaaaaactaattcttattgtggataaaaaacttgcctacattacgtatgttatccattcatttctt  
ttcagtttcatagtaagctaattattcagcttattctgcaaaagtctacattgggtaggcttcaaccattctcatttgggctcgttgcattcat  
gcacttttggaaatggaactttagtattttatgacatgaatattttggctacatgaggacatcaacattgctataaatgatctcatgtatgtgaa  
acgatagattgccttcttttccctctcatataatttcttcatgtatttcaagcaccatattgtttgttttttttttttttttctcaatgaagcc  
tatgcttcaaggagatttttaggagatctaggtactgtaccttgccttggcaatgtttttatttgcagaaagtaatttcttattatgtttatgta  
taccgttctactacgttaccgcttcttataattttgttttttttctcagttgttttcaaatgggttaattttatttgaattacttagtctatatt

atagttcttaattttgaagtaacttccacttggttagtctgtcatttgtcttgcttgttctattcaactaaactattataagctattatcttaac  
aaaaatttaacataaataataaacataaagatcgggattaagacatcatgaatgttactcgaataatagcgttcttagcttcttaatgat  
ttcagcttctttgtctttatcggttctactattgtgtagtataaatgttgatataacaggacgatgatcagaacaacgaacattaatcgacgtgtacg  
ctgttctaagttagatcgcatttagtctgtttcttttcagagggcggtcacttacatttttgggtgacagaattctatcgggtccacgatggaaccc  
gctgttttcccttaagaagagtagtgttttttttctgtctctttatgtatctcgggtgaggaacttacgatgtgcataatcatcagtgccattg  
tcaactgttaggatggatagaagtaagctgacttccagtgagggttagaaaaacacgttttgcatccatttcttccgtagctgatcaaacgaat  
atagcttactcaaatcaccaactcaattagtttgcacatcgctggtatctgcgcaatgcgataattaaagtcacccagccaaataatattgcta  
aattcttggttagaacgggtattatttaataataaagaaagtaacctgtgatcgtagattttcatgcccagacgaaataactagccatccactatt  
gatgcataattccatattacgctccataacattgttagtctttgggtgcaaaatgggaagatataaaacacatgtccgatcaaaaaagttaattcta  
tagccaccgctctttatgtgtaaatctccaaaactgttttccgggtagctttcgatacttttgagatggcatttagcttgtctcccgaacaaa  
tatagtaagaaaaacaccagtcatttgagcagagctaatacaggacatatttaagtgtttgaatattggagttcactgtttgcaagatttttctccc  
aaagttcatcctttgagagctgtattcacaagatgaccaatattaagtaaccaattctgaatacctaaacatacaaatcatatactggagt  
atgttcaccgtatgaaaaagccacttctgaaatctccatagaaggaactttccggttgattataaaagtcgtggtgtacagcgaacattcattgt  
gagtaacataattcatcgtgacgctgatgtaaaacccttgaacataagtagacattgaatcagcaattaaaccgatctctgtcctaagaaggca  
ccgaggaggtataacatagattctgagtttctcatcgggaaatctaccgaggtacattcgaccaaagactttgcaaatcacttaaggaaccg  
gcgagagaagaataaccttctagaatactgaaccgatggatccaactccagtcaccaatttggcaatagcatccccattgtggaccaaaag  
ctgacatgtatttcacgaatttttccgaaagatctgcctttatggagttgaacatacttttaacgttatttctgaaattttcattgagccaggtt  
gttccgccaaggaatctatattgtgcaattacacattttgaactgaggagggaagatctgattcatagttatgaaggtaaatgacatg  
tctttgagtgatcacgcatattttcttaaaaccagtcctcaaaattgatttttgcaccaaagcaatgaaattgcttctgaacagctgggaa  
aggaaagtagcattaatgatgcttgaagctgttttaagaccttccacttaccctcatcaagagatccaaaacgaaaatttcttgaattc  
ttttagtttacggaagtacggttaaaagcaccttggcttgcctgctcggagctgtgaaatgacacgtagcctccataccaagaagaatattctg  
ctccaaaaacaaggaacggttccgcaacctgcaaaaagctagctaattttttcctggagcacaactcagttcccaaatagagaac  
aaaaagcatcatcatccagaccagcggagatacgtttgtgagagccataactactgagtttgatataatggccattgagtaaaagctgttat  
cataggactcgcataagccagaaagcaacgtaataataatgagggcagtttgtccccaatctgagcctcctcaaatgctgtagcaacttctcga  
atcatgaatcgtatccagcaataatctccaggatgaacttggtgtgctgagctactctcgtaaaacaggaaatgacggcgatgcataaaa  
agtacatctgtaagcagttcacttagactagctagtgatgatattcaatgacctttagagcttagaatcgttcgatccccaaagtggatta  
ggatggtctggatagacgaagagtataattcacaacttctgtctgagtcaccgttgacaatgctatcgtcccaaacgctgtagcacaagaaca  
aatcaacagactgtatctggaaagttggctctttcattcccattggagactagctttgtgtagcgaacaacatagaaaacgctaccattac  
cgtttccaaacagtagtaataaaacgcttccataatgccatggattggcttttccatacaaaaggtcaaagtcgctcaatttctgaaacttctcatgt  
gaaataacactcaaagtgatcaaagcttgaagtagcgttgagcgggttttggaaatagctaccagccacttacaacagtaaggacctt  
tcttttcttataaaaacaaacatagcaggaatcgaaaaagtagtttctgattcctgcttagtaaggtgtagatgtaacaattgtaagtc  
ttcaagagtgaattcctaactaggcaatcatagatttcaatagtttcaatattttacataagaataaaatacagaacgtttcttttacttggtt  
tgcttcatttacgttttctgtaatttctttataagaaagaggaaataggatcgtatgtagaaattttatatttaactcaggaacaaaaag  
aatagaactgagagaaaactaccgagataacaaaaaaagattccattagtcgaaactagaatattatacattgttcatgaaaacgaattcatt  
aaaagcggattgtcacaaccctaagcattacgattctcagcatgacgactcctaaacgctatttgtaatagcttagaagatgacggagaatt  
taaaacgagagagtataaacaggataatggtaattaacgaacgaggactctaattgtaaagctttctatcagcaacgtagtccaagca  
gcatcagatccgatcaaagtttctgtaaatgatagcattcaggggagcaggctcatctccgatccattgacgacaggaacttgccattcaaca  
gaagcatttcgaggaattcttccactagagcaattgaaagaggacattcaatgtattcagttctgtaaagtcggaccaaatattttatcaaaag  
aagcatctcttgagctttgatgtaagcaacaagcaacatactggctcgtttcattacccttgagacacgcttgatgtgtgaaaggataaaac  
tgctccaaaactgtatctggggctgtaaatccataacggaaggtatcaatccaatctgtcctgaaatgaatgacccccgtaacagaattgga  
ctgtgagtaaggacctatattgcaggagccaatagctttgaccttgaatgtaagggcttctgttgcagcagtgctgtgtagcaatacacgagag  
gtaatccggtgatcattgcttaaggagaagcaatacaagaacgacttggtgattgatgaaattaaaatattttgatagacaccgttcaattc  
ggaaaataggtcatggatgatactataatgacaacaaagcaaacattcttagtagagtaggaatgttcagcaagaagacctggtgtcgcacg  
ttagattataatcaatttttcaaagcacacataccttcaagcttgaagagagaatccgctcttctcaaaagaattataactccgactttc  
tggtataacatttctaaacagaaaaggacccttctttcttaagacacgctctcggactggaataggaacaggctgtacaggttctcttca  
tgattgtcgtatgcttcatattcatttagaatcgttctgtagatagattgaaaattgcttctaaaagatttcttaggaaccaatgggtgtcccaact  
ggaacaggctccaatcgggctttctctacatgggcaagtgcttttaaatagcagactccccagaagaatgctctacaacttgagatccgtta  
aaacgattttcttgaataaggagcagctaaaacgagcgtctcgtactccccaccctcaccgcatgggtgtaggtcaaatcttttttaaga



catgagctttggctgcattcccctaactgtttgtttaaatctctttagttaatccaattgcagcaacctttatcaaaactgcttgagaccagattg  
gatcatgtcatctaaacattttgtctgctccattggccatagataggaaaggctaacaaggcccaaacgcttacatacattctctacacgagttctc  
tggaagtagacaatatggctcctgtagaaacagctccaagtcaggatgacattcaagcacatgctttaatagacgatataaatctccgtttcat  
cgtaatgggtgaactatattctaagttttgatcgatgctgctacctcgaatttcttctatacaaaaggcagatttaaacactcagcatacaagggg  
ataatctcgtgacccacacattgatacataaaggagtcaatttcatctaaagaataattaatattcagttctttatgaggctcaaaaagggtatt  
acctttctcctcgcagggtaaaaatttctaagctataatctcgtgcttagggacacacaatgcatcaaattatagcagctatctttaccaccac  
taattaagcctactcttctattattcatgaactggattttccagtaaactcctgtttttttgtactgagcaacctcttattttccacttatacaa  
ggatgaaatagcgtgtgtttaaatgtcactaaatgatgtgtatacaaacaggtatttgtaaataaaaagagatggaaagcaaaaaacacag  
tgtagaaatacaggaataattaattttttagaatcataacgaacctctcattaaccataactgaatgactgttcaaaaaatgaatatag  
gctgcaaaaaataaaccaacaatagatttcaatcgatcaaaaaagaaacaacaaggaataaaaaattcagagattttgtaatgtctaaa  
acctctgctaattacaagagaacacactgtttgaactttgtaatagcaaaaaacagagataactttcatatccaacagacaacaaaaagtc  
tacatcatatgctatagcaagttaggttttgagtcattcaagctaaagtttctgagttttccaaagcaacggatttttaacctttctcgata  
ggttctgttagccagtcattaacagtttcaactgtcagtaagcagttttgtaatgacgggcctaagaaccaactcgataataactttccgtaa  
tcgttccgtacagcacagatccataaaacacatcatctttaccgtcatctcgatacttctggaaacaaaatccaccgattcataatagcccgcga  
ctccttgcggattaggagtgaataataggattgtgtttatgtactgtactggtctttgtaatacaataaaagaatcgggatctaacatgacagaat  
aacaagttgctgtaaattcgattctacagaaccaaggtgtttgaaactatacatccagactaaaaacagttagtgagataagatatttatct  
taacaataagaattgcacgtagtataattggaagaagtagaaagctaaaaacgaaatcctttcattgcttcatctttctatctatgtcaagaaca  
taccttcaatctcatctcgcgatagtttctaactgactggcagaaaatagagtgatcatagcattctctttttatgtgctcatataaaagac  
ctttctaagcatctggttagtctatgtttccaacaatggcctgtcaaaagtaaaccttgagggcaaaaatgacagaaatatacgtataatgggtt  
ggaatccattgtataatactttatattcatgaatcttgagtaaacgcaagtggtttcacgctcatggattgatctataaaatacacaact  
tgaaagtttgagtgatctttatgctcgcacacgtccataccaagatgatctccgctagcaggtgccttttcgtataaagcgacaccgtcgtgg  
ttccaaggggctccacctaggaatctcctcgcactagtttaagcgtcctggatgtgttttctcgcaacgttcaaaattgggtcggttagcttt  
aaaacgtagttggaagtcagtggtctgatcacttgcacccaaaaaatcctttgattcaattgtggtgcttggtagtcgggtgactttcaggggtg  
ccaatcaagtttaagaggttctgaaaacattttagtcaaaaagttttatgcaaaattttatataatttatatttataatattcgcgatagat  
gcttagacggttaataatgctgtaacgaggatcactaatatggtgtcaatacagcattcaatattgcaagaaaatcctgcctaatttatataat  
ttgacattttctacaagcaattgagatgaaacaaagcaagattttgaccgatttgattgaaattacccaataataatgccttactgtattgac  
tcatatgcgaaaaaaaacactactgttatacaaaatttgatctctttttgtcttactgaaaaggattgactattcttagcaatccatcg  
tccatagaaagcgttctgtttctctcgttactagattatgaaacagtgaaatcagaagagaaattgaagcttattactgtctatggtagtct  
atgaaacctaagggttctaaagtgtgctccaattgtaactcttttaaaaggctgtttccggtgataagattgtttgaatcttctgtattact  
caactgctgtttatattggtatagtaagattatagctttaaattgcctttagagtaaaaatgcaataacaggtgcttattataaaatagac  
tcagcagtaattttatgaaactgcaatttgaggagtctatgtctcctcggcctttatattctagtcaaaaatttcatatcgttgactattttcaaaaa  
tctaataatcgtttatggattattatcaactcatcaattaactgtaatggcttttctccttttagttagttggaagggaatgaatcatccattccc  
ttaacttcaattctgttttccaataactcttccattctctaagctcactcaagcataactaaaatggtttactctcactgtctgttatgttacctata  
caatttgggctttatctgatcagtttttccacagtaagagtttctactattccaagaggaattgagcgaagaaacaaaccaagagtactc  
agttaccttcaacgactattttgatactcaaaaactccggattttcgtcccttctcctcagaggagataaaaatcttctaatttctcttttac  
agagaaagaaaaaccataatactacgaaaggacaagtcagcaatcgtttttttatgcttttctcggcctcgttaaatgagtcacacaaagta  
atcttaacttaattattaagtaattttagcgacatttaaagtgagggtgtcggacaggcttttatacttctaataaggctcatatctcctgcaatct  
aattttttattaagaacaagattaattatgactattgatcgaaaacacagtagttacgactccaagcttttctcctcaatgatcgggaata  
tgagcttcaacatcgatcgtgcatgctcgggctaccgattgcggtgtcatgaagatggaatggtaatgacagatttggttaaggaatattata  
ctcagagaagtgctgactcgggacattgcttataacagagtcattttctcgggcttaagtcaggaggattctctaattccttctgtgtacaat  
gaacagatgtcgaagcatggaagccgattgtgaaaggaattcacgataagaaatgctttgtattcatgcaatttggaatcttctggagaattg  
aagccagattatctgaagaccaagaaaggttgaaaatgttactcagggagaatgtcctatggatccaacaggattgccggcagccttgggaa  
gcgcttactcaatatgtggggaatctctgtatattgataaatatgtcaaaattggataaaatgaacatatcgtgagtatcgcgaggccgcta  
aacgtgctgtattcggatgcgatgctgatggcatagaagttcatcaggtcaacggatttttacttgacaaatcgtttgaaacggatttgagaaaa  
gtgcatccgaactatagaggctcattagaaaaccgggttcgattttgcttggagcttattcagtcagttgtggaagcaattggacaagaacagag  
aggctaccgtatattcctactcagatctggagatccaaggatcatgtcgaagccatacatatctagtcaaaaggcttcgagaaaaactccc  
aaagcttgccttactgcatgttatagagcctcggaaatactggacaggtcatgaacaaattctcaagaaaaaactcgtcagatcaaaagt  
tatggaacacagccgtgtgagtgctggaggacatgatcgggattccgctttgcaattgacaaccaagacaatgttttgggtgtcttggacgata

cttttggctaatcccgattacctttctgtaaaacacaatttgcactgaataatggaatcgctccaatttacgcgaaaaagaggccagag  
ggctatattgattatccattttgacgaattcatccgtgaaacagcaaaagcggaaaaatcaagcaagaaaatgaatcctgaaactattcctt  
tgaaaaatgaactggatacattcttttctcatatataaggaatagaccttgcctcggacatcctctttgctgcaacaaacaaatccagaa  
aatgataccatataataaggataacctatcaaaaatacattgtacttacttgataacttcaatcatttttaattctattctcagcaatcatttttt  
tggctttttatccacatatacaattatcgtttatcttctgatatcgctacttattgtccccgaaagcaaaatgaaaaacatcaagtccactga  
aattgaagcttttaagcatatgcaataagctagaactaatcaaaaaataaaaagaataaaaaataaaaagctggatagaaaaacaatga  
gttgagactactcaatctgatgaaagacaaaccattcactcagaaaatcaacgcatataaacaagaggggagaagaacttttatattgaat  
ttaaagcttctttatgtttatgcaagtatttaatagtcattttataaaatccaaatgacaggtttacatgctttggactttgtccaagtaaact  
taactatgtaggggattccttatagctaaacaaagcctctggaccttgcctcaaaactaggaccaataatacaatataagagttatcttttaag  
tagaatattaaagacagatttaaggacaaaaggaagagcttgagcccttggtaagagtgaggacaaatcaaaaggataaaacgtgaattaa  
agcagagctacaaaactgtaatgacagactcgacgaaaaacgtgtactagccattggaatcccacaattcgctacagcttcattgaaaaatt  
aagggaaaaatatactttgacttcatctctgatccaactagtcgaatggaaaccattcgtaaaatccataaggctgcagaaaaataagt  
acgatgcttgttttggctatttgcacgctcctatactccattaccaaggagatgcttggctcctagtcctggctgctgctgttattacag  
ggcctctggatagacgatttagatgtagaatggatgacggcaaatgggtcctatgtcttaatgtacccaatgcttctacggaaggtagccgt  
tatgaatcttttctattttatctgtttacgtggatccccggaagcagacaaactatcgcttctggaaaatggcacggaaacctgctttaatgg  
aagatccttggtaaaacggtaggtataataggaatgggtgcatcgggaaatcgtttgcacaaaaatattctcttgggtgtaaggtaatat  
ataacaacagaaatcgctcctacagaagaagagactcttggatattaagtatgcaactcttgatgaattactctctacgagcgatgtgatta  
gtattaattgtcctcactccatctacgaaaaactgtctcgaagaaagattcaaaaaatgaaagatgacgtttacattcttaacactgctc  
aggaagtattatgtagaagaagcctcatcgaagcgatccaactctggaaaagtatgtagcgggctggacgtgtttgtaatgagccgaatc  
ccaatccattttggcttacatcgacaaaagttactgttcagcctcattggggaggattcactacctcactgttgcatggtcgaagaagccatttg  
agaaacattgatacattcttgaacgggatccccctgagctatgttaataaccctgtgatccgaggatgaaaatgcttcttcttcttgaatgat  
tttgcacaaatgcaaatcatgaataacttactatgagcatatataattttctacgatcgttacgatatgcatatgactatttcttctgtaataactaag  
agtttactttcaaaactagtgtaactatggaaaactgttgcggactttcacagtgtaattcttttcataagagaatctaggatttatgaggga  
acttttgttctgcaaatattcttaattttaagctataatagatttggattcaagataactattcttttcttattactcaatttggatctttcacat  
atacaattaaatctataacactaaagacattataagagtccttcagcaaggcgtgttacaagaataatgtaaggaatagtgaagaaagta  
ataactctggaatgattgattctgttttatggctacattatcctgggaagaatctatcatatacaattcaataaataatgaatttctgcttt  
caacaactctatagatggtagcctcattatagttgatttcaacagaaagctagaatacacaagagttgaggggttttttattactgtgctttat  
cactctcattcgctcacatagcatgaagcttcaaaagcttataaaaacgttctgatatttaattttctttcaagttttatgacatctttctttg  
gaaattcaactctatacttgatattttcatatgctatccaacgttctatcgtaattcactttcataagtctcgacattacaaactcatatcaaaat  
tatacttctgctgccataaccatactgctttcggcaaatgccattcagaggaaacagactggttggttggaaatcgatgccatctgctgtaat  
ggtagcaacgctaaattgttcaaaacttctcatcagatagtaaggacacgaatacagtcacatggttagcgagcagcgtcctttgataa  
agttttcagcggctgctgctccttacgcatcaacggaagagcaagatggatagcaaatccggtagcaatcgagggtcagtagtaggtgt  
taccacgcaaatcagcaaaagccacaaatggttcttttactgcatcgacccggcaacaatggcttggttccaataaggatccattttattac  
gacgagcataaaatactctagacaagtattcatggatagagaggggttcagggcataaccatctccatagttgctttcttaactcaagatcctc  
aagaattcgtttagatgttggtaactgaaacgtcctccaataccgacgattgtattgttccgaccttgtgagacgctctacatcaaaaaag  
cgagcacaagatccataagatgctaaattatcagcagcaatcataaccatctcgcaatttcaatgcaattacggaggcacctgttacaatagg  
ttgtgttctgtaaatcactggagcagcattttgtgaacatcactggatgtaggaaagaaaacatttttagctggcttccccatggctctgtta  
gttcaaaaaactcattttgtatgaatgaggtaggttggcttctggcaggtctcctcaaccacaaaccttactacatacgagaaatggaat  
cgaatccgctgattaaactgaattatgagctcaaaattcattgtttatgttaacttttaataattataaattttgtaattggtatcagtagctttatt  
atgtgaacggcattttaaatagacatgtcaatgttttaactcttttaggcgttcttggaaacattcgaacgatagcaacagccctgtaagttac  
tatcaaatattgagatagattcaacggagagaaggaaaataatgtccttctgagtttaaacagggtttttcttatttgcacgacaaactg  
ctcctcatgtcttaacattgagaactaaagcttacgatcttctcctgatgttgaattgacatctcattcgcttctttaaactgtaacgctttacag  
gtttgaaaggtgaatcgaccgaaatagctcaaaaatagcttgatgcaagaaggttcaatcaagaagcttgaattaagcatttgaagaac  
cattgtaaaactagctactgactctttgtccaagaatgtattttggcattctcctgattttcaaaagcaaaagtcggatcatcccttacaattgttt  
atttactgcttaattttatatttctgctattgtttttccaaaacgacgatattgggcaaatatagtcggatctgtttgtttgtttacgattcaaac  
ttgtacatataatagctgtctcaggtttttttctattatttccgattacaattatatttgggttcataaatctcactatgaagatcactgaag  
ctacttcggttatactctcctcaaggagctagttaaatcttgcgaaacactatttactaaatcgccatcaacctttcaaatctttcttctca  
atacatctaaaccagaagaatgccgaatgcatggatacaccacagctattgatgaacccgcttctattgaggacgctgaaagcagtag

tcaagtatacaaggaagtagagaccacccatgctgccttgtaaaatcagaagctgtaaatgaaatcaaataacttgcaaaggtcttttaaaa  
ataataatcaaattcacgatgataattccaatgatgttgattcaattatcccttcaatcgaaagtgaacggtgtttatttaagcaacaatccgc  
cgacagaccgttctgtctgtgcaactgatgctatacctaataatgaaattatcaacatcttttcaagccttccctaaacgaaattgatcccgtgga  
tcccagttctattgaacaatcccttatgaagatcttataaaggacgttagtcccttaataaccgaggaacaaattgctgttgagattccaacaat  
actacactagaagttgatcatttgcttaagatacaagtacaaatttccaagaaaaatgttttaactgagaacacgaaatgaatggagaatt  
taaaatgaagggaaatccaataggacggtagccaaacatgtcaagataagcattcagcactgaaattgccttttgatgatgaatttgaat  
tgatactcaatgatgacttaacaaaaacgtcttctcgtgtgagcgaacctctataatctcatcaacaaaaattacgaagaacgacg  
aaatgaaaagcaagatctatgagaacgacattggcatgtttgagattattccttttctccagtgcacatggagggtgattgacgagtaaaag  
cgatcaacttggacggtcaaggccgagtcattgttttgaagacgaaaaatcttaattctgatgaattgattgaatctcattctactaaacttaca  
caagagttgccttactcagaaaaatctctgaattactatacgtacgacgttagcagtggaagcaggaatcggtgttaataacttactttaggc  
gatactgtacaaatcttaccagaactgccttgcgtagaacactgtctgaattattgtataatcccattgagcatgaaaacacaaagttggat  
gtttcatacaaggcaaatgatgctgaaccggagcttacaatcttgaatcaatttaacaaagaatctctcaactcctagctggtgattcat  
atatgtaccaacaaaaacagctcttcatatctgattctgggtcatgttatattatatactatccattcaatggatgttaagttcaacagca  
agaccattaatcttccgcttactctttatgtttgtcttcacaagaatctgaaagctgaaacttcaaaaactactctactagcaaacggttaa  
ttctattaaatctgtgactttagggaccattctgaaaattaatgagtattattatacaaaagcttcaaaaggaagcaaatctgaaactcttt  
gtctatgagaaggattggaccggacggatgaatcgaatataggagatattctttcatcaaatagtttcttataaactcattataaatttttaa  
tgctattttaaagaacaagtgaataaataataataaacaataaaaagttcatataaataatcttttttagtaagatagatacgggtgaacacc  
agatgtcaaacgttcttactgataagttacctcaacattagcgaagattcgtaaactcttgaagtacgtttcgacgatttgcagggcagtgggc  
tccaaggggacattaagtggttggacaccacattagatattgctgctcatalccctgtgaagcattgctcttggctgggcatgggctacac  
aattgatacgttcaaacatgcgttgataagcgggaacaaaggagccttcaagagattaatcaaaagcaaaagatccatcgtcatttgggaac  
agaacgtacgtattagcgttctttagggagtaatgatagagggtgaacagcaaaagaggtgtctggtgtgtataacaggtccaaagtcacg  
caaggtatttagtctgttccatgtccaaactcttatacgtcgtcagttccacagctaaacaggaagaacatcatcagccaagccaatcc  
atctacggtaccataatgagatctccagcctgttctgttggcttctgtttgtatgcacatctaaacagcaaaagctagcagaagctttcggatgt  
cccatagccgaacagtcacatcagccgatccagaagccaagacataatcattttcggacaccaagaacagataatacattccctgtatgacct  
atataactgtgagataactaccgctctgcataaacggatagaactggatgcataagcggctataagttattagaaaagcaaaagaaa  
gaaagaaaagagatgtttacaacataaccgaatataacagtcgacgcataggtgaccaggcgtcgaataaacaataacacatatta  
aaagaatacgttctgttatttagcaaaagttggcaacagaatacaatacctgtaaggtggcgcgtccaaacttttagagatgatcga  
aagaggaactagtgaaataaccattatgaacggaaaccaatgaagatcagtaattccaacttatgactggagcgtctacaaatattagtaact  
gattctggcgaacgaagtacaagacgtacgtggaatggcgttatatgtatccataacggtattcttgttctgttagatcaagagattcaaaagt  
ccaacgttaattgaagaattggcgcctccagaatcacttaatacatttgaagtaaaaaatacatcatctagtaccaacttacaatt  
gatgtgtgtattgtctatagacagtgattacagagccaaggaggccagccatgtctcctttgattgtttattttgcgcaaaagtcattgttt  
gtaaacgatgctgaagcaattggcgtcgaaggacgattgattctgtccgtcaatattcaattcagaactcaaaaaaactttagaataacc  
ctgtcccattctctggctaaaagaaactgattcattcagaatgttgaatgtttgcaacagtaactatagacggtaaaaactcactcaatctccat  
ggaaaacttagctttatagaattgacaaataaaaagtatttagaatttacagcaagagcttcccttaggtatcttaaaatctccaagatttctt  
tgcttggcaaatcagttctctttatattagtttctattttaaagctaaatttattgccttttttttttttccaaaaaagaactgtttatagaa  
cagtttaaagtagaaactctgaaccattataggtacagtgaaagcaccaccaactccagaatttcaaccaatgtctgttatcgagattaggt  
cacatcaactggattcaactattccaagtcgggatttctgtgtgactgttatgcagactgggtgtgctgtaaaagcattcacctgttt  
ttcacaactggcaagcaagtactcaggtcctcaattgtattgcaaaagttaatgtagatgatcaaacacaaattgcctcgagccttggagttcg  
tgctatgtatgttctcgtctttttacggttattactaacattataggccacctttattttcttggagaatggcaacaaattgacatgctaccggg  
agctaatgcgcaagcactaaagaaaaagtagcgaacattgcaggaaagctgaacggaggtagtgctgttggtctacatctactaacggctat  
ggtaatctcagaagttgtattgagaatcctcaactagaatgtttaaatacaagcagcagcatcaccttcgtaacgctcttgatttagattctcca  
gttacttggagctgacgtgatgagcaactgatgatatacattccttcttggagctgaaagatacattcgtgtctattactcctgttaaagaa  
aacttaagtaaagcaccgaaaactataaagcttcttaatacttctactgttctcgttggagcagctgattccttccctgctactcagatcat  
agaagacattgagataaactgatgatgaacctattaatacctttaaagattgttaaattccaacgtgtgaactcattagttatcttctcctc  
taatgttggggatgaagaaactaccaaatgtgctgttgaattattgtgtaacgttggcattcaagcaagtaagctatagaaaactgatg  
ctaaagtactgcaatgaagaaggaggtcattcaacactatattataatccaagcaacttgttctaactgatactgatatactttaaataatg  
actgaaatagttgatgctgaacactaagaggcttattaccattgagttacagtagaagaagaacggatcggttgaagtaaatgaatca  
acaaaaatccattacgtagaataaccagaaaaagatcgcttactgagttatatttttttctattatcttgtaaccgaaaaagaactttat

acacataaaaaacttaaagtcaaaaaagcaagctaaggcggccgttcccataattggatgaggctttctcctaattaatcatgtcactgctgatt  
tcttcaacataataatcctgtatttggtagcatttggtagctgtagctgtagccgaaagacatgctgttctccatcagctgacaaaaac  
cgattcataaacgatgttgaataagattgtaccttggtagaaatggatgtgactttaagaacgaatcgcaataatggactcatatctagg  
ttatcgagaggaaatgtgacaatggtaggatttctttagtaaaagtagtatttttcatgaaacgttcatatggaataatagataggcggcgtg  
tcatcaggtagaacggccgacgcatgccaacttaactcctgagttgtgacgccgttatacttttctaataactttaccagttcaactgaggaaat  
gtttccttcaaattcatcttgaataaaggcctcggaggcagattcaatgtaaggtagacatgtaggacaacatccgtttgatgactcggctcct  
tcaatactacgtgatctccatttggtagtggcgaatggtagattcaacacgcaagtgacctggaaattgtagtgaatgattgaagtgg  
cttctcaatcgttgacttttccacctaatagaacatgcaaagtagcaggagccatgataaaaactctagcggatcttttggctgattgagta  
ctttttatgggataaaagagttacctcgtgaattaactctttagggagaaacatgctttaaattgcttggggtccatattttacggactgtaattgc  
taatcgctgaataactgagaacagccatcaaagttgtaatacaaatgatttctgtaaaggctttacatgagaaagtaaatgaggatgacgt  
tgaataatcattgctttttagtggtagcggacaaagcctacgagttcaggttagcatggagtcaaagggaataatagaagttataatggt  
cttctggttggtaaaactacgtgtagatagggttatgcatcagatcataactgacctgaggaaacacggtccagtttagcaacttcttcgagt  
atagtggtgcttataacataagcaatcgtgcaaagcactagatttctactgatagactccggtaaaatagaaactcaaagtagagcagtt  
cacgaacacatgatgattgtcattcaaagcgtgaaagtagcatgagaagaggacctcgtccctgaaaataccttccgaaaactaaacaagca  
tagacactgagatttgaaggctgacggaacatacttttgaatcgaagtagtaattttagatgataagcaacctagttagtagtattcatcg  
gccattagttactcagcttctacagatctaaataaaggctgcttgaattggctgtatttcttactgaagcagtagtagcagttcattgtcct  
agaagtagcctcagaaactcgtcaacttctcttttctcatggaatccgcatcttcatcctcaaaggcgctttaaagattgtttattcttatta  
atctccgacgcttgattctagcaacctctgttaatacagacgaatcgagagatgggtacttcagctcctcaactgactctcaagcctaa  
accaaattcgaataactacaataaacgttcttttaggttgttttaataccttttttctttttataatttataacagtttaggcagtggaatc  
gtttatagatcctgtgagagcaaagagcttctccatcttttggaaattgctgtaggcaattgcctttatattcctggcttattgaacataaact  
tttaataatacaaaatgaagtaaggaagttgaaatcagttagaagccactttcctgctttccgttctatggaatggtatgtcaagcctcc  
gttgtgtcttaactcagaaatagcattgatagaacattcgaagggaatctctcgtaaactaggctcttccaacctgaggtgtcttctt  
gagaaaatgtcatcaaaactgagctcttaaaaagaaacgatttctttccaccttgaagaatcgaagatacagtttatcagatagtgcg  
gtaagccttgaatctaggacactagaggaggctaggattcttatggtagcaactcagtttacttaaaaaagtagtatttctcgaagggaatgaaa  
atggaaaccacgttctcgttggatgattcctcttttgaatcttccctgtgcttcaaaagtggttccgcaattcctaaacggaatgcttct  
ctagccaagcaacacgaggaaatagcggctgtgtcatttcttttagattctattataaaacttttagtccctaatcattgaaggaacaacag  
attctacgtctacatattgcaagaatctttatgcttctcatctttcttcaatttaaatgaaattgctaaaaattgagaggaaatgcaaatgaaa  
gtatatgtctatggattcttgaagctgtacgaataacttccctctgatgttctccacaaacaaaactatcagccaattcttttctcagccatc  
tcttactaccatgggttccggttaaaatacttttatacttctcctgctgcttggtaaacgctgcaacgtgtttatggtaggaaattgtgca  
ttgtttgggatattggttctcgtcctcctcctgaagaaaaactctactagcaatttcaatcgttctacaattatctgagaaattgctt  
cgaatagctacttcaagttacaaggacaagttctgtaccttgggttgttcttcttgccttgaactagcaattttaggttccgctatgt  
tggattgttcttactgatattgtgagtgattgaccttactccaaaatatactgacggaccgagacttctcctcattgatcgtatgtaggc  
ttcttagcatgcttctccgcacaattacaatttaattatgcttgcggttattgcaattatgctccgctgtagtgaagattcaattgta  
tacgcaaaactggcatctcaaaaattggcactttgtcaattactcatcaaaagatgcccactcaatctaccaattagtaacttactgt  
ctccttgatacagcagatgtttttcccttccagggaacacatgaacatggagggtttgcatcctcgcataaactccaacaaact  
ctgccaatttatgaataatagactccggacgtgagattgctctgtaataagcagtagaaagattcatggactagctatttcttgaattca  
aaagtttgcgaaatttgaccaaggattagtgctaaaataatgctttagccgatatacaattaaagcaaatgagcgcacttctcatt  
ctgattcagttttattcaacacaaaatgctgacaaaacaaatggacgaaaattagcttggcaatcttcaatcacccgttaattgcca  
atgggacagagccgactctataaacgactagacttgctaaaagcttattggaagaaataacaagtggtattgtcgcgatacccctcgg  
atcaattaagcggatactactgcctcctcagccattaaggcgttaagttattgattgaccaaactcgtgggagaatttaccaaaagatg  
aaaattatccagcgtttcagggatattggttctactatcgttttaaataggttccggtttcaattgacttaagttagactttagccggaactg  
aacaattgcccgaactctcctcttgttttgaagatttggaaataatttgaagcaatttggactaaacactgtttgagaagtcatattg  
agcattctgaagtatttatcgttgcagtcattaacatcataggtttatctcgaatcaagtcagaattgacttctattgcaaacgtggattaaag  
tcttaaatgttccgaaatttcttctatccgtgtccttactcgaaggactacgctgtaaaactagtcgaatatccgcccgttgcgaatattg  
agtgatctacgttaggatcaagccacttgcctcaattcattagagccattgcaactcattgaaattttaaataatttctagcggactaacatgatag  
aattatcaatttttggactctcttctcgttgaagcacttcaaaagtaattgaaagaaattcaaaagcttcttgtttatgctgtcatagaa  
ttgattcgttcgacggttggcttggaaatgtacttcttctgataacctactcctcctgcttggcactgctgatattgtacagattttaga  
attacttactcttcttggaaaggcagaaacgaggaatgcataatcagtatattcctaagctttagtatttctccgaagttaaagcttacaattg

tttgtctgatatttacgatgttcgtgagagggtactctctgaattaaaagcaatgctacagattggataacagtcagttccaaatctattccaagg  
ccactaaaaatctgttacagctcttctcgtgattttgaagacgctgatgatcagaactgtcagcttggaggctcactgtctcgaagtgg  
gattaaaactccaagcttgcgtgaaaactgcgttctcgtctttgggaattggattccagattcagttctgagttatggctgattacacaat  
acgccaacgatatgcgcatggatgtctcaatatctagggttcctttcgataatcttgctaattgaacttagaaaaataaccttaaacatggaa  
ggtagcatgagtgccgacaagggtgaccttcttcaaaaatctaaacttttgagcaaaacatcactttgaacgatttggaaaatgaca  
ctcaacgaaatataatcgccccagaagcttctgaacgatccgcaaggctccgctcatgaggatgaatcgacatgtatgtttgaattt  
cgaaaatgttttattaacacttagctgttttcaacttgcaggaaaatcatacggattcctttatcgagttcagccaaaaatctatgaaact  
tgggattactttatggaattggatgatgaacgaagtccatttttagcccttataattgtgcttaacatcattcgttaactggaaaaacgaaacttga  
aggaaaagagagggttttctcaacagcaagagctaaatcgccattagctttgccaatgacatattctccgactgagagatcatcttcatactta  
taagagtaaagtgaagcacagatgatccctcacctactgttggtagactcatgtccggcattttgaaggcttgggtatagtgatcgtaaaagt  
gcttttattcattcagttctgggtttgtattgaaaaagattcgtgcctggagtttagtcgcaatgcattagcacgggaactcactttaaat  
ttcttttgggttaaaaattgctgaaaattactaaacacatcattaggttctaggtattataacctctgctggatgctgccttatgctggttacaga  
aacaccagcatggacataggggagataaacttagtgtgcccgggaaatctcgattatgaggatctatgtgcaagttggaaaaacttcttaa  
gtcgtttaccctctcaaaggtaatgaattttttagtagacatttttaacaattgtctagactctacgatcaagaagcaaaatctcctaataattttat  
gaaaaatgaaatgtatagattgtatacttggattacacctgttcatatggaaggaattgataatgattgacgataccggaaagctttgttca  
agttccggcattactcagaaatgctacgatttagcttggagaatctcccctgctatgctttgtatattccaaaacgcttcattgatgattcattgata  
gatatgggtggctagctttatttagctgatcctgcttctgcttattgaaatctctatggactatttattgaaaaatccctgacggtaacttct  
ctctggataggaagtacctttgtattgggacctgtttatctgttaattggctccggtttgtttaagccgaaaatcagatggaatccgcaattactac  
aatacacggtagctctatggaagttatccagttccgctatgctttttatgtacctcagattgtgagctctctccggtatgacaaaaatagggtatg  
ctgagagttttatacttgaagcttccgggtgatcacaattttgcccatacaatttatggaatgaaagcaaatatataaaagatgaaagtgg  
tactgttctgattctataaaaccaatttggatcgtgtcatgacaaaaatgatagcttccctttctgggtgatgacaaaagctttatgaacgagaat  
tcttttcttaacgaagttacttctatctccggtaaaacttaaccattatccgaaaatcaaaaccagagaagaaggtatgtctacagcagtgcat  
tgaaatgcttattcaaccacaataggctaaaattgatgaagagatgaggcaaatcaaaactcagatgtaggtgttacttacctagcaatcctgatgg  
ttagtgattggaatagatagaaaatctggaaagcctttgcaaaagccttccaaagcaccgctttatggctacttttaagattcaaaaagaaaagg  
tcattaatccagaccagaagaagaagccgtgaatggagatgaagtgaaaaacaatcaaaaagcaaaacttatgaagttggcaatcagctat  
tttcaaaagcggtagcattgtcggcaagatgtactaacgttaacaatattgctatcttaagaatataatcaactctgtgggttggatgtgtattt  
attccctatagagttactgctaccaatcctgggtgactgaaaactttaagcgaaggcttttattaacctattactagtggtgttatcgatgtgct  
accaaattgcatactcgagatagcttggagctgaggctgttaattggcttatatgactatttactactaaattgggtggtaggactctatagcat  
ttcaaaaagctcgcagcaatttattcagagatgagcggcttattccgttattacatacttttgaattcaaaagatagacataacggaaatcat  
gatagacgatcaggacataattacatataagtaaggactcatgcatgagtaatgataactaacatggtagattttggattttttgatattg  
cacctgggtggaattacattgaaagtgtccatttaagctgactcaagaatgattgctgtgatgggaggaataacaaaaacacacaccattccaat  
ggttcaagagctatcggttaaggccttcttagcatcccgtccttatgctaagtcgatttccaagcctcagattatgttgactccagcttcttct  
gctttaaggacagcttgagattacgcatactttagaacggtttgccttggatgatgaatgaaaggcaggctgcaaatcatgctacatttgattg  
atcagagttacaatacaaacgaactcttatgtatgatcaattcaaaaagcgaccaacggttaagtaaacgaaaaacaaacatttcaacatcagc  
aattactaatcacatcttaggaatccttattgatttttagcttttatgttcttcaatgttaagaaagtaacctaatgctcctgatggattggtaaa  
tatcaaaactgagcgaatgattaaatacacacaaaaatcgagttttagcttaaatattgttttatactgcttggaaaaattattaattattatcgt  
atagaattgtgacaacacagtagcagggtatcactgtaaaactaagttaaaagcaaatcagatttagcaaaagaggtaaataaaaattaaaga  
aattatctgatttcttggataaaaggcctgtcattgaggtcctattttttagttatataagttccgaacgcgctacgcgtaactggatttactaat  
acttgacagatgaaacaagaactgaaaccaccacttcaatgaatctaagatgtagaacgtaaatatgaattaaactaattcaaaaa  
agttctgacatgattgagcgcgttttggagaattgagcattaacacatggaacgatgcatcagaaaacgcgaccaaattgaacaagagttta  
caaagcagatagaatataaaaaatcgcaactaacgacggaaatgaaacttttcaaaaaaaaaagtataggaaagcaggcaacagccagtg  
ttattattgcaataataaattgacagataaacagtgaggaaaatgttcaagaaaaatgagtcgttaagttagttaagatctcgtcggc  
agcttttggaaactcaaaagggaagcttaggaaagcagattcgcaagaactgggacaataccttgagaagctgcaaacacttgttgagcaaa  
ctaatgaaacatgatcagtaaaagcacagtaaggactgtgaacagatgttaaatataagtcgttttgcataattatcatcattgcatgaat  
cgtcggcaaaaaaatcctgttctgtgacagtaaaatcgagctcatagagaagtagtctcggtaatattctgtacaggaatgacagatcggaaa  
aaggcttctagcttgcagcttctcaactgatccgtttggccttcttccgaaataagagttgcttttctgttgagtaaatctgtttgagac  
cagatagccgctggcgttcttttagctcgttgaagtcttgcctatcatgacttcatgatcagttgcattttgtaattcagaatgatcttttagaaatc  
ttccttagacattagtggaagctgggtatacaggtgtctaaatgatgaatgtcagcgaatagcattcaagaacatacactctttgcatgata

atctttaatgattgcatthaaatgtaatttctgatattgtaacgcttgcaaatttactaaagctgttcaagagcagcacgatgttcagaagttgctcc  
ctttgctctttgaagttgctcatatgattcacgattaactgctctcaaaagtaaaagctagcagaaagctgttttttatttctgtgagctctttgttg  
ccgtttactggatcttcattctgttactgtgaatctgcaaacacaaacgctttgcagattccaacgtttctaaactcagctactgcattttctgac  
atctcaggaagctaataaggcgtcacagagtgccaaatttgacgaagttgagaactttacttttctgttggtggaattgagaattgtcgacgctct  
ctactcctcagttttctctataatctttcaacgggtaatcgcccttagtgagaaggaataaatagcttttttttctttgtttgtagttaatcgat  
ccagtttctaaatcgaatcgatttttgaaaaaagaaaaaaataatcaagagttatcgaaacgggaattgggaaaagggaaaagattgggga  
aaaaggttcattagacatgagaatcaatcaaaatacgagcattgactgtggaattgggtttggttccctatctggagcggcatgtgtgaaata  
tcacaactggatgaaaaatccaaaattacaagaattgacatgttctgagcccttgacattggaagaagaattcaaatgcaaaaatcttggttg  
aagatgaagacagtaagtaattgttgcttgataaacactgaaaagttttcattgtgtttcattctatcaaggatcatattgtctttgctttcttt  
atttattaactgaaaacattgggttagaactcacattatgtgatttacaggcaaggagtagaaaaataagaagcctcaaattctcatgaaatcct  
atctcatcgcaatgaggatgattgggagacgtaaacatgttttaacagaaggatagaggaagtcgaggacgatccagcagcggcagaggac  
gagaatcaaaatagtagtacttataccagggtgaattggagctcatgattcgaaacctgaatatcgaggaaaaggctggggacaactattg  
ctgaagcctttttgactacatggaagtgagtgactgttgcaagcaagggaattgcaaaatacatcatcaagttgtagcaaaaacgtgcca  
agcctacgctattcaagaagataggatttcagcaaaaagatgtgactgttttgatcaagtgagatggaaaagccttacattgagccttt  
aattgctcttctcgagaaaatctggatgaacttagacatcgactatacttactactatagaaatcaacagaaattaattgacactgatccaa  
aagattacaagctgataaaagatggttatgcaacgttaaaatacatacaattacgatactatagccatacaaaaaacctgtcagaacacac  
aaaatgatagtcagcataaaaaccaatgatcgatgacgatcacttttattaagtgttctattcagcttgagccttttatgcttctttccaacctc  
agaaaacagtcagctacacaatattgttagtacgtttgcttatattggcttcttttctcctcaacaacaagtcgtcataaatcatcctacacctca  
aaagacgttgcgaaggactgtgaaaaataaaaaagcttgccttaccataccaggaggagagattggcggagcttctcagcttcttgatc  
agcaacaaccaaagtgataagtagtagcagcgaagctgaacttaacatcctgttttggttcttctgtatcgggcagaagtagcgtccttt  
ctgagcagcattccaagaattgcttaattgctgtgatttgacgaggctatttcaagtagctttatattccttctccgaaagagatatagcaca  
gcagcttcattcgatcattgacgaaattatcttctatttacgctacgcataatcttcttttgacgcttcttaccattttgtaagcttggtgaaaga  
ctggatttgacagaaattccgttttacaaaattatgtgactgttcaaattggaaagaaagcttcaaggacgtaaaccaaatctgaatgcta  
acatagctaacgagaatattgttagtatagaaatgattgaagtaagagtaaaataaaagaaaagaaagagactttgaagaaagaagcg  
tattggagttataactaggatgtcacagagttgatttctctttatcaacaacagttcgttttctttggaaatgtaaacactcagattgaaataaa  
atagattgtagctttttacacttgagagaagcaactacatacaaaagcactggaactgtatactgaaacttatcaatgaatgcatttgaag  
atgcagcttgacatgaaaagaatcaaaaacatcatgatttcatatttagatctttttatatacgtttcttttctgtcgacaaaacaatgactca  
tgcaaaccttagcaacagtcagaaacattccatagataaaaaacataaaactttattaacaaaaaggctttaaattgcccgaacttttatcatt  
agttacatacaatattccggttttctgtaaccatgtcttaaatgagtgctctcattttctcaaaaaggatttaagagctgagcaggttaattcccaa  
ccggctggctgaacggacatctgggtcccaaatagtagtgaagagactttccattaccaaatattctttggaacacagagagacgtcctct  
gctgtcacagctaaaaggcgttctctgctgtattgtaacatgtcatcgaacacacatctgaaactgagataaccctttggcttctgctctgag  
gggcatcaaaccttgaaaaacgcttaactcgcctcatcaaggctgattcagagaacagatgttagctgccattctgaggcctctgtgaaaa  
ttgtaaatgatcgagatggatcagcatctcgataagtaagaaggaaagaattccatcaactccaccgtatgagagaccggccacataggcacc  
gcccttctcagaaatttctcgttaggtactgtgagtaagcaatgatgataaaatttgaaggctgctccatcctcatgctgtatggaacacca  
atatatgacgtggaggcgaattcgtctggaaggaagctcatgataaactgagtggaagaaggaccaaagcttctgagccttctgtctttgt  
gttctgtggtccatggatggagaaggcaacaatttctcaaggattccttcaaacactattgttgcaaggtgacgattcactgcaacctttacac  
atgagacttttcagaaattcgtgaatttcttaaggtgagataactaataatccaaatcttccgctgttcagttgactaagtagcttacttgact  
gagaccattgagttgctcagacatatgtgctttctgtaaggctagaagctgatgacaagcgcgcaaatgcatgctcctttcagctatgccatcg  
gtgataccacttatagatgtctcagcatagttgctaattttctgattgtcaaagttgtctcatagaacacttttttatcaagttggtcattttcc  
cacgttttcatctaaacaataaccagaaacataaagttgagtcagccttagacaacttttaggatcggttaaccagagatggtgaaacattaa  
taccaccagatataccggcgatttgtttcaatctcagctatgctttctcggaaagtctcaaaactaagacaagcatcgagatatacactaaggta  
agggagaagatgctcaggaaatccttcaaaggaaataatagtcgaagataagtgagaccagggtcaattgtaccattggataggaacatta  
cccagttccatgaattcaagctcagctttttctgtagctttattaatcagaaacactgagcgttaggtaaacagctggtatcctcaagttgtgattg  
cttttcaaaaactcagcactgactgttcaatttctgattttgcttttggaagagacgagacatggctctgtagctttcggcttctttttctgat  
agttttcagaaaatccgagaaggatacatgctgaaaacaaatcgtgactgttcttaagacgacttttgaatcaatttctggaataatttacc  
atctttgtttctgttcttaagccattcaatctgtttattccaggaagatagctgctgggtccacgccattaaaccagtaaaatggaactgactgag  
ctagctccataccaaagtgagcagattgtgcttcaaagaaattccattgatggagaatggcatcctaactttctgtttaaaccgttctcagcc  
aagtctttgaaaacagaatagatttttctcctaataagggaagtgatcgttgccagcgccttctattcctacagaaaaatacccctctgtgatt

agagtcataaccactgtttgggaaaattctgaaccaatccagattcgatgagagcttggtacataggagaagaaaaccgtctaaacatagt  
ctagagagatatttcaatgcaaatgttctgtaaatgtctgctgtatcattgccccaaacgaaatagaaaacttagcctgggtggtcaggaggcatc  
acggggtctgcgggaccatactcagtgacacgtctttcaccttcaaaatcagcgagatacatctctggcttatgaatttcttaggactgaaatgtg  
aaaaggatcacttaagcagccagattctccttcaggggaaatgagccgtaagaaaaatcttgcattcgagggatgataatgagtttgtga  
aagttgactaattctcatagctaaatctggaatggcaagtggatcgctcactattggagccatacgcagttccctgaaagagatgttgctga  
aagagcatgtaaaagacataggaagagtcggaaactgtcctttcatttctgtaaaagacaacaccattgtaaataataggagtagacttgcctt  
aacgtttgagtgctcaaatctccatccttctgcaaaaagtcaagctttcttaactttggaaaaagagtggtcatccaagtaaacatctcgtaaat  
tataatctgtagggtcacgggtgcaaaaggataaaaagtgaagtctgaggcagtaaaagcgttcataaagttgccaactgcgattcagcatt  
ttaaagaatggatctctgactggatctgttgcctccgcaaatgtagtgttctaaagatacgggaaatcccttgcattatctgcaggcgtatg  
aaagcaatgctgaacacattataggatcgtttcgagaagatggatcatatcagccttagtagcatcatgctgcaaacgaatgtattcctaactc  
taactcaggtattttctttaaagttttagattaaatctgtaggacgatattctctgtagagagcttgaagcttacatcataacggaaaagt  
cgtgtatctttcacggacatgaatccagcgacgaaaaggttgccaactcatttttacaatgttttacgacagaatgaagatattctggcgtg  
attcatagttttcgaaaaactatggaatattggtttggacacgaacttaggtatgggtagcctatacaaccaactcatgtagactattcattac  
ggaaatcgttgaatcggtcctcttccattcctattatcttctgtacctttactgaattatattataaaaagatttattcctcaagcttgcctt  
gttctgtactatttaagggtatgtctgtcagtcgattgttcacgctacgtttgaagctagagaaggctatacaattcaaaaatatttcccagg  
atttctatcttgaaggaatgaatgctcttttctagcggaaatcaagaattggatcagtgtagtagcatttattcgaatcagctatgtt  
taagtatacagaaagaaataggcaagctttatgaaaggaatgcgtacttcttctcagttggatactcttacaagcggagataaaatg  
aggaagctgctgcgaaatactgaaactctggattctgtatcggtagcattgtctctctagttcattgaaggaaataacatggtgaacaattc  
tgtttatgagcttttctggattccttcaagcttctatggtcctaattattctgttgaagagatcagcaagggtgagaacagctgtcttgaagca  
aaactcagtgccattcttccatctcaatgccaggaagaaacttatatgatccatttccactgacctaaccgacactattttctgataca  
gagttggttaggtcctgtttcctcatgttataataatctgatgcaaggaaagcggattctttggttcatcacataaccaagagcttactc  
tatggatcattactcgttaagtctgctttgatgaagataatcggtatttccgaattcctacacaaatatttctgtaggactaacagatat  
tgacattctgaaaattcgaaccaagaaaaagggtggatagctttgacaactgattccatattgttatccaagtcattctttacgatattgcctca  
tttggccaacaggtccattgtccaatcgtgtcctcaaaaattcaacttcaaatggcttctcttacgaacgtcttagaggatttactgaat  
atttattgtgaaagtttaatcccagatcgaagtaccttaaaattacaaccattcatttggagcaatttacatcatccttcaattcaa  
cacgcttaatttagtccgatccttagctactaccaacgaaactaatttattgagctttatgaggtacaatcagctactataaatcgttgaatc  
agtatcatgacagcatcagcattccggacatgagaacctagggtggaaccttttagacaactcgcagatcagagatttattctcaatgttgacagc  
gttgggctaagaaatattcattaccgctatccttctgtatgcttattgatgcaaccgactgcttggggcgtccattccctttactcttgcagat  
atggagaaagtctattcccacaatgattcttatttatttttaaaagtggtggtacagtttagtatagtaattgtgatcatgttataaattct  
tgcttgcctataaccacaaatgaaaacaattcttacttaataaaacgaaatggccaaaattctagtttacttttgcattcttccgctcagaagt  
ccgagtaattttcatcagaaacgtcatctggaattccaaagatattctatattgccttagaatatcctgagcggcttctcggagggttcttctca  
tctggctctatcaattccatcactatccttccgcatcagaaatggctcggcgggagcgtccttcttggatacatgcatatccttcatgag  
ctttgcaattgaacctctttgttttcttttctgttctgtatttctcaaccttctactcaggaagatagcttttcaactcttgcagcctg  
gaatccactgccttcaaaaagtcatcattccttccaggtcactgaggaacgaaacaaaatctaagtgctgtagaattcttccagcatcaa  
agacatgctattaacaagcgcacatataccggagggtgctcctcggcactgttcttctcctgtacaattgctgctgaaattctcaaat  
cagacatccatcttggcaaacctggcgtcttgaacatcacactgttatagacaataatcagaggaagtttctgtttgtaacatagagcaag  
catagagcatcgatgacatgaaagtagatgtcgacgtggaacggggagtgctgataacgtaggcaatgcaggtaggccatgaactggcaagcg  
tatcgtgataaatactcagggctgacctggaatattcaattgtccaggagatcaactaagatagatcaactgtcgggtgacggttttct  
aagatttcaaaactgatcaaaactggtaacaaataaattcaaaactcgcataataaccaccattgggacccaaatattatctaaataaatcatta  
gaagtggttttcaaggcttattgtaaaagttacatactgtttcataactctttataattgattgtgctcgaatataatattgcttcaagg  
aaggttctcagcagagatcaaatataatataatggaggcttctttagaatgcaaatgagcattcagttgttcaggaaggttgttttctca  
tatttaggtaagtaactgatcagcaatattggaagaacttctattaaatcaattgtatcattatatactgatcctgcaattcaacaacgat  
aattgaggaaggttcttacttttactcatttctggcacttcaactcaaaagggatttggtaagtggtatgtgtaaaattgagaacagagaa  
agattatctgaaggaagtgcactaggaagcttaccgattttgaaatattcattttgatagtcattcattgaagaaatatttatttctctgca  
acagacatgcaataatcaggatattggaactataaaaaggtgaagacacgtaactggttcagaaaagctaaataaattcatttagtttaa  
aggaaatcattttcattggtgttccctttagaaggttttagtagatagcttaccagtaggcatggatcactatggtcaattccgcttgtttt  
ggaatagagttagttgcttgcgactgaaagctaggattttgtttaaattatcattctctaatgctgctcagcattcatgaactgaacaggggt  
atttgatcgggttctggaagcattacttagttagtctacaggttctgaggctgcaattggtcatccatttcaattcatctatcatgctt

tgatgctgtagttagaggcttttgtattccaaaaaatcatagctactcctcgaatcgctactcgaggctgactcaggattagtgacggctcat  
tatgcataagaaagggtcaagttcttctgcttggtaaaaaagggttagttgaagctacagtaactttcacgtacctgctacaaatctgtttcg  
gaatgtgctatttcaggagacaatctagggttcggtaaagccgaatattcattgccttctgtttgaaaatcctcttctgttccatgtttcatgtttta  
aactacgctttgagtttcttccgagagctgttcagttttagtgaagcttctgtttcattttcagcttttgagcatctgatggaggcttaaagatgg  
tgccctcctacgctgtctatttctctgtaaaagatttgaatagttgaagctcgtcttaggtttaaagttagtgactgaaagctcgcagcagatga  
aagttcatctcaatacatatccttgggtggagccatcttagaaattctctgaatgtaagttttatcataaagacagttccccataactactaccaaag  
tttctcaacgcgcgttttaaaccgtcagtagtaccctccttttgcacttttcaaagcaagagctttagcacgacaattgtcaatcgatccgtatcc  
aatgtcctgagtgaccgttagtaatttagaaaaagagattggttcgccattccattctctgtgataggttccatctttagtgtaatgcgaacaa  
ttacgcttaggccaatactgtatcttgtgtttctttagactcatcaatctatttttgttagattgcaagcttatttttgaattcatgaacagtttctg  
tgctgcaacgaaagcacttctgacataatcgacatgaatgctctgaacagaagaagaccaccattgaacccaaatattcattggcaagctcaa  
ttgctttccatgcttctaagtaggttaccgaagcaccgccaggtccacttcgacgagatataattctggccaattgcatcgaagcaatttcga  
catttctcctgctccaatggattaaatgcagtttcatattttcattagaactataatttttccataatgctgctccataattttcttcttctgaaag  
gattccacagaacgggtcacgtttgtactggtgtaatagattcgacgcgaggtatgattttccattcaaccacgtcactttcatgttcgcgtttt  
attcgttttctgttagtaataaattctaattttgaaatgaattctatgttaaattgacgcgttcttagatagaaatggacatacttttcttctt  
ctaaatatcatataacattatgatatttgaatgtgctaattgttggtaatattttgcattataatgctatgtgagtatatagttttatagtt  
acttaaaacaacaagtaaaacaacaatcaatgaatttagtaaaaaagaatatcaagaaaaatcaagtttaagatactacggattta  
cgagtaaatatttaatagctagatagctttacatactctgtatgttgcagacttaattccaattagaaagatctacttaactaagcaagtg  
cttttctttaaactcctaaacgaaaacacacctattggattctaacttttcttacttttttccattcgtttattataaatccagtcacagtt  
agttccatgacacatatatgatatagtgatttagactcttgtttatttacttcaagggattaaaatccaataagttactactcaataagaaatta  
gagatataatggaagcgttataagagaactagacaggaattgagacatggattggagtatatgagttcgacatggcaagcaaggaagac  
gaaaaagaaaagattaatcaataaaaagactcaaatggtagctgatcaaaaatggatcacaatagcaaatgttcttgcgactaaaaaagaa  
acaatactcccagcacaaggaatcccagcttattttgatagaacagtcactgaacctcaattataactagaaatggtcgaatcagctggagat  
ttacgaataaattggaaccaattgtttgtcatctttcctttcttcttccatgtactcctctgaatataagaaggtcacaattgtttcgacc  
ttgcaatggaataacttaactagtaaatcaacaacttttttctacattgcaatctcgatccaaaaaggattttcacaattttcataaacctt  
caaatcaacatgagcgtatttcagaccttcatcgttaaccaataagaataataaaactgaaacagtaaagcttgacactatgctgagtg  
ttaaagggatagactagaaatctattcggtctccgcgcgaggtcaaatcctgctggtgctgttttttcttcttcaacaaaaaatgtttcata  
gactcgtattgtaattatagattgataaaatcacagttgaaatttcatgtttaaaccatcacaaggcgttttgaatctaccaactgtgca  
atattatcaaaaatagaagtgccacataattacagctggaattcaaaacaacgggtcattacgaatggaatgtgcataaattttcatataccagat  
ggtcgtaaacaaatcttctgatgatcattcatagaacagactaaatatcatgtgtagaatgtgattcgagatattttaaagcagaaacaaaa  
aataaaggatcaaggatgaaagaagaatggtaaaaagcgtcacctctaatggctacgtatgattttgaaatgcaaaatttttaggagtttctt  
ttgattccaaaaagccttacgaaggctgattatcaatccttccgatgattctcattgacaacatgcacgcaagaggaaactggagaactttt  
atcatagaaccttcaatgaatcaacaacgatttattcctcttacgtgcagctccaacaagggtcgtatcttttctgttttatagccttcataag  
acattgcttattcaagaataaatcatcacaatctctattgcaatatctccttcaaaaactgttaacataccaatcgttaaagcaagtatcat  
attttctatgtaagggtgttagaaatatttttcaataacaagccattcagcttcttacccttggcaggtgtgactcttccgaaaaatgaaga  
agacattgtgtaagttgggagtttggcaatataaaggagatacgaacaggtgtcaaaaagcctttatgactagaaaaggaagatccaa  
aaaaataatatttcttcttgcataataagacctacaatgaaagataaacagcaactttaaactcttttctgaattatgagtttccactc  
ggaatgagtttggggaagatgatttcgcttgcctgtttcttccaccttttctcatattactacaacccagtaggaatgaaataagatt  
cgtcattttcgttctgattttggctaataattcctattttatttttctcgtttaaattgaacattggaacgttcagaaagctgcaaccgtgaaat  
caccaaagtgtcaaaggcgaagagaattgattttgcttttgaactatttctattatattctacaagcttaattgttagaattgtccttttatt  
tgtaccgtcatgtcaaattagcagacgagttgttagctgatttgggcgacgatttcgagaatcaacctcagaactgttgaggaggaggagg  
aggagaaaaacgatgttctcaacaaaataagaaaaagaggattcgaacaattatcagaactgggaacgatcttccctcgagttgaata  
atgatttaggtcaacagaagatactgaagatcgaatgaccaacagcagcctactaccgctgaagcagatcatttaattaccattccttact  
cagatcgtttaaacaatgtagttagaaatgaaaaatcaagggaccgagaaacaggctattactggaaatattgaagcagaccagaat  
atcaactatcgtcactcaactcaatagctatggaatgtgatgagattctacgtctacatcgtttagtgaagaatggatcatggctgttt  
ccagagttgagtggttcttcaaacgcgtttgattattgtaagactgtcttggctctttaaaccgatctgaaatagcaaaagcaaaacttctt  
tcttccatccgccagctcatggtatcgctactacatcaaccaccacaacaggtcgcctttaccggagggtatgattgagaatgtaaaacaagg  
gtgtagtctatcgaacaattaaggtcgcgaaggttaaaattataaattatgtcagtcagaatagtgtagttgctcaaatattctaccatt  
gtgggctcgaacaacagctgcaaatctaattggaattgccggaggactactagattagggaaatttcagcttgaatttcccgcattagga



aaaaggctgacgacaatcggaattaacaatccggctgttagtggtgattacggatttctgtacatgtctgatattgtccaaaaactccaccgat  
gcacgaaaacaggcaatactgatacttctgctgcaagggttcattggctgctcgattgattccattcatgaatttctgatggctccttcggtataca  
gactcgaacagaggtagaaaggaaaattgaaaaattattagacctccgtctcaacggccacagttgcattgccgttctgacgacaaaaccg  
aacgtcgtcgtgggttagaagaattcgcaagatgaaagaacaatatgccgttaccgagcttagaaaaatgcaaaaccgtgttactttcggca  
aagaagaagccgaggttcttaattatgatgaatcagagggcttggatgctcggcaagaaggagaaggcaagattcgtgctgcttcattgat  
actcgtaccaactgaaacttccaaagcaagaaaagcccagcttcaatcaatggcagccaagaatcctctcaagcaagtggtctacaaagtt  
cattatcgttactccagtagcaggaatagaacttgtgaaccctttgttcaaaaggcaaaagcaagtggaagacgcaataaaatggttccgagat  
ggggttttactcaaattaaaaaggaatctagcgcatacgcacaaaaaaatttcatgaagaccacaaaatagcttacgactagatatttgaatga  
gaataaaatacaaaaaggaaaaacggttattacaaaggaatgcaattgattagaacgagggtaaaaaaaactagctttaaataaaaaataa  
aaacaccggaagattgacattactgaccaactcttccagtagttccataaacagcccgcgtgatttttattcaagaggatataatcaggc  
agatgaaaatacatgtaaaaagacagctcgaaaaaaaacgatattactaatacacgtatatagaaacagcagcctctcgataaaatata  
atcaagaataaagaaagatgcagattggatcattacaaaagcagaagaagaggaaataaaaataaaagaaagcctccatctcatttggat  
ggatcttgaaagaccgcgtttgacaatgcgatatcagaaaagatagaagtgaagaattattttcgacaagctccagtagaagaagcgg  
atcctggacgtgaagaccggcctgctctctgttgcattccatcctaagactgaggaaatgagttgtaggatttcaaacgcttggctcggc  
ccgtggtaaagtaaggaacgatacgaacaagttgaaatgagttgttatcgatttttccgagctatcgccatccttaacatacaaaagcgtttg  
gtaagatgctcattaaaaataacggcctcgtgctgtagtttccgattaaaagcgatttctccgagcctctcgtccaaatccgaaacttgcgaat  
acgaaggttgcttcatgtagctgttcttctatcgaagcaaaagcagattccttggctacaaatttctgacaactcatccaagctgcttggatagg  
tagcctgtaactcactcttctccaagtggtgcgtttgagagcatccatctctatttcaagctatggtgcttgaaggctcttgaatttcttct  
tggtattgttctgacgttcggtttctcccacaactgttctcgtaatcggcaagacgagctgctaaagactctgcaatttcatgttcatctttgctct  
tcttccattgctcactgtatgcttaaatttggctctccttggctcagtatatcgttctgtgctgcaaatgctccacttttggtaaggcttttgg  
tgctcgtcaagtttccgactcttattgttcagctttagtcacctcagcgttctctagcaatttccaaactttgaaatctcgcgccgcttgcg  
caaggcctgcgaatcttttcaagcgttcgccagggttatcttaattcctgaaactttgacagaagattcgtatggttggctttaaagatccat  
aagaagcctgcaattgctgtaaattcctctccttttcaagttcgatcttcaaatcctctgcgttcatcttctgagcaatttccagggacttccagg  
gtttcactaacggactctctatgttatgctcctctattcgtagattgcccaattcctcagaagacgcacattctctgcaatcggctgtttcct  
gcatcttctgccattcctctgtttggttgaataacgaactctaatgtgcttttctgcttctaccactatccttttgggtgagttgagcttgaaca  
accaagttacaaccgaatatcgatgtaggtacaacaatcgcaaatctccaataacaaaacacattgaagaattgttgcgggttaaagcttgg  
ggaaattggatttttggattgaacaagtggttttgggttactataggggttttgcgcccgaacgctggattttagagagaatt  
gtttgaaacatcgattcagctcctcgtcgtctagaataaagaggattcggttattaatattatcgctaggcattcagttgctttagatacgaattac  
gaagattggagtgaaatgaaaagcaatatacttctacctaacgcctgcatttctgacggataagtgttctgtagaattcattctctgactttgat  
cgcaaaatttctgtttagaattcgatgagtgcttgaacgttctctactgctcatattgtatccatacattgctcagttgccaatacttgacaaa  
taaaaagagggaaccagttgcatcgtagcatcattgttgcatttcttctatattcacactagactccatggcaaaaagacatagagctgc  
agatagtggttcggacgtgaatgattcctcgtcttattatcatcgaaaagaaagcactaccatcatttctgagaacacgatggaccataaaga  
atgtttgacttctgagcgaaaaactcaaaagctaactgcattgattaaacattgttggaaagaaacaaacggctaccaaagacgatattactg  
ccgtccttctggctatgtttatggcaggttagaaggaattatgaaacgttagcaaacgtaataagaattcaatcacaagttccaaactccc  
taactcacctactattaatgtggatcaggcccttctgttttctgaaaataataaccgcaaccaagaaaagaagacggagaataacctccacagt  
tgcccatttactgatcgcacaaactcgaagacaagcttccaccatatttccgagcttacgaactttaccaaaccagtcgaatccgagtgaaac  
ttcttgatattcataacgaaaggttagaattccttggcgacagcttttcaacatgttaccacaagactatttttaaatcgttctcctcaaatggatg  
aaggaatttctcaaaactcagactaagtttgggaaacgaatgcccgatcagtttctcggctgatggctttagataaaaggctttagtaag  
ctattctgctgaaaaggatcaacttagaaaaatcctaaaaggtatttgcgatacttcaagcttacgtcggcgctttagatttggacgatcaagaa  
gaagctgattcaattgggtcggaaatctgctaaaacaaagataaagaatactatcgttcaaggtcctattgataagcttccaagtcaagct  
attccataatacagcaccgaagccatataagaataccgatgggtcgtatggagcaggtggttctcagaaggatacataatagcgtgatattta  
acggtaaagaagttgccgagcttgggtgcaaaccaaaaggacgccgttctcagccgcaatggaagcttgaagttcttgcgaaagaaa  
aaccataatcttctccttctcggcttctagttgatccctcttttactgtaaatagcaatgcgaactcgtattgtcataagttttatttactt  
ttggaatactaggtttttgaatacataatacttttgtattttacatttttaactttattacaaaagcaactatatagtcattggtattttaccatct  
aatttctcgtagcctatttgaattcacaatgctaaataattcattatgaagaaccaagacaaattttaaagaacagattttagcttaatat  
tcttctgcttttataagagtatctataaggataatcatagaaaacgaaaatccacaagtaataaaaaagagatgttcaaaaccggttattcattg  
agtgttggaaattacgcctgattaattaattatcacaagataaagactcagaagatgctatatagtataaagatcttaatacaagatgagcaa  
tgtgagaagcctgtagcaccagaggatcagcagggcaacccattcggccttgggaatccagcgcataactgtgtcagcgcattgcaaggg

gaagatttcatcaacaatttacggtaccagtaagcttccttagtatctgggatcatcgccattccttctgggaacagcaaatcttcatctg  
aaacagccaattcagcagtatcctcagagcatcaatccaggagtaaccaacacatccgagaattgctcctttgtctccaaagaatgcatcag  
ggaggtatggttgacatcaggcttatcagaggtatcaaaagccttacggatgatgacttctttacggccgtaatgtacatctttcttaggat  
caacgttaagagtaacttcaaaaagtccttatccaagaagggaaacagagcttcgagaccccaagccatagtggtttgttggcagcgaagca  
atcagacaagtgaagttcttaacacgtcgaacgcattcggatggaaatcagcaggactaggggcatgccaaagtaaagataaccacaaa  
aatctcatcagaacctcgcggataagaccatcttgacacctgagccttgattttcgagaaagcaagtaacataggtgtactgacgagatgt  
agtaacatcataagttcaagatggaaaataacatcacgaagagcgtcaaggccttctcaatagtgaggatgctcatggtggatggtgccca  
aaaactcggcgaccttacgagcggcaagcaagtcaggagagcctggcaaacgattgcaaggagtaaccttgggccaagcattgatggtac  
gggcttctactcctggtttcttctgactagtaacttttggttcgcgaacagcaatagaggcaatcaaactggagtccaaaccaccggaaag  
aagaacacatagggaaactcggccataagacgcttgcggacagcagcttccaaagattcacgaaggatcttatagtaactggattgtggca  
atgcatcttcatcccaccaggaaggttcgaataacgaacagtttctggtttcagagtcatagtagtgaccaggagggaaagcaatgatctt  
gtcacagactggatgcaaagcctcaactcagacgcaaagtcacagtgctggggcttgagagttaaacccttggataaaagtggtgataccga  
tgggatcagagcagcaaccctttgcttcttctggtcacaagacaaaagaaaacataccatcaggaatcttagcgaagcggggccgat  
tcttggataagtaagaatgacttcacaatcagaatgagcttgaagttgtaagaccctcaagactggcgcaactgaaggtggtgtaaatt  
tcaccattgacggaaagaaccagcttgcctcctcagaagtaagaggtgagcaccactgtcgacaccgacaatggctaagcgtcgtgacaaa  
gaatggtttgttgcgaatagccttacagaccaatcgggaccacgatggcgagttgctttgacaagtaaagagcttaggtttaaagcttca  
tgtcctcagcagacgatgaacggcgagaataccacacatatctgtatataattatataacgatgatcaattgaagtaattgaataattcaaac  
tcgtttttgttttatcagtaaaaccaagcctgcttaaattcgcagactttatacaggttaaattatcctcaaaaaattatagattcaattaa  
ccttaattctaacaaaagaacggttactggcctaattgcgaatgctgaattgcaatgtagtgggaaaagacaacttccgtttccctcgt  
actgttgataataagaatcaggaaggacagattagatctaaagataaagttagatagcttaagcattggtaaattgccgtgccgtaaatatgt  
atacagcgggtcaaggaaattgctatataaggattaccaagtgcggttaaattgtatatacctaaactggatattataatgaacaactcagaaa  
ataaataaggaagtatagcgaccataccaattgtaaagttgtaacagaaagtcactaatcacatgattgcgccacagagagtaaacct  
gttaaataacctattctatacgaatccatggtaccatgatttaacttttagctactactcccgaattgcatgtgcacaaatagaacgaaaaatag  
tgccattgacgaaggaatgtgaaatgttagattattattctatagcattgagttatcgttagattcgttttttgcgaacgaatcgctggtta  
ttcacagatttggctgcaaggtttgtaaacattcatcatctcaaacggccgaaagatctattgtttctcgttccacaactggcttac  
agttactatcggttggaaatcctctctcattgtagaatttgggttgaacccttttagttgggtaaaatcattcactttctcttgcgattggctagctg  
gtagcctcttttctgagccccgttatatactattgcttactcgtttccagctttgtgccaactaccattacaaaagctacctattttgcttc  
tgttctcgtttcgttaccattgatttaccatgggcagcagtagtcgcagaagatccttcttgggtcaccaggatcctaatcaaccattgatg  
atcgattggaccaaggtctgccaccaattataactcgaattgggtgaactataaaggtatgcttaccatgactgactgggcttgttcttcttctt  
tttttattagataaacaacgattgcattcgttttcttccataaaatgaagctaacataattctaggtgcttggatcattcacatcgttctta  
ttgctcgtttacgttctgtatttcatgagttccgtcagctctcgtgaacttgcctggacgttgaccaactgacatataaggccgatcttctactat  
gttccactgggtaactggaaccctttgaatataatggcggtgcttacgatcactcacaatgtgggaacaactgatgagggtaaccagtatac  
tctgcaaggaaatgttctgttaccattatctgttctttttagcactcactacactcattataatggttggatgttttagtaaatattggg  
ccctcttcatggtttgattccaaagcttctgctgttcacagaaaaagaatgttgaatacaaaagttgcttctatgacgacgaaagcgaaac  
tgtatctcgttaagcccgaaaccttctcgtgtttacttttattccatgctcgtgattgtcgtattgaggtatccgctgtttgattcattgttt  
tcttcttttccggttttcttccgtaaaggcttccaatcgtctttatgacatctttaaacaacctaataaataagattttctttagactta  
ctgtttatgttgattgtaaacctgtcttattcttttttcttatttactataactttagaaaatcgttttattatccgctggtattgtaaagggc  
cgtctcctaactcggtaagccttgttctgttgggttttctcattactccttggattttgtaagtctaaagtattcattcaagcaacatcttgtaa  
cgaagattgaggttaaagaatgaagttgaaatataaattgctttgttttggaaagtgcaaagcgttaacttcttctgactcgttcaagtgata  
tattccgtagttgaaaggattaacgcttccaggccacatgtatactgagtcagaaagataacaatgtgttttctgtaccttcatcatttctgttttct  
gtttgcttttctcagttgacatcaaaaattgaacatgcttctgacaaaactatgtgctgtatatacctactagctgatactattatataaaaaat  
acaaatgttactttatgaacataaattattctgtaactgaatgtattaaatccttctgctgctacaaggaaaatgtagaataagcatcgcaa  
agagatgtaatatagaagtcatagatgataatgcaacttagggaaatgaaaatgctatgcaatgagcgtaaatagactaaaatgccatactc  
atggactagacgagacagatcaagggctttaaaatgcaaaaagaaggtgcaagaagtaagccgaaaataaccaatgcaaaccc  
gacatatactagataaacaagaacacatttatttcttgggggataatggcctgttggacagccatcatctcattcaataagcttggctt  
ccattttgccaacatgaggttgtgataggtgccatttatgattggtaaaagggttccatatacaatgtttgagcgggtgaggaattgaaac  
tgttggatgaggtgcaaaggagcacgacgacgaactttatgacggaattcaaaactcgtccaagattcgcgtttcaaatcctttatgcttca  
agagattcaaagctaaaatcgaataatagaatcgacatacaggttcatctgttggatcatgcaaacagccaaataaggatgttccaaggcctcctc

gacggaaatacgctttgaggatcaaactctaataatctcgaagcaaatcgagagcaagagggttgcctttggaaaattaacgtgaaaagga  
attggctttttagggagactctaacataatcacgagcagggagctgctgatatgtgaaagcgtttcattatcaggagttccgagttggtgca  
aaattaaatttagttgatgaacataatctttccttaataacgggtgaccgccccaaagttcagctaaatacaaccgacactccaaacgtcta  
cacccttatgataactgctgaaggatagcataatctctggagctctgtaccatctgtagccacatattcagtcataaagccaatattttcatcggc  
attttcggtgcatccacgagctaaaccaaagtcgcagattttgagttcgcaatctgcgttaaccaacagattaccgggctcaaatcgcggtgaat  
cacattagccgagtgatatttcaaaccacaaagaatttgtagataaaagattgaaagtgagcgtccgttaaagggtggccgatttgatga  
tagcatttaagtcagctccatctacccaatgtagcaaacagagcttaaaagcaataatgggacgagttaccccatcatgatatgaacata  
ccaattcctcgtagatgtaaactcattaaaattataggtttatgatgtccagatcatatatgcaagtaactatacgggtaattcatgcatata  
gcattgacggtaatacgtccattttttggatactcaccgaaggaggaatftaaatgcatacgtttcgatgattccgcatatgaattaaca  
gtttaatttctgaagagcagctttgttaaataaggttagagaagacattcgtaacttcttaattgcaactgcctcttggtcttacttgctatatt  
tcgagctgcacagacaattccatgaccttgaccaactcttaacaacctcaaatatgctgtaacttcaactttctatcactcatattcaaga  
agaaactttccaactccgtaaatgagttcattagggttaattctctgcagttcaaccgttttcataccttaaaatggggtcaacatacatcttga  
ttaaactcgtatatactcgggtgcggcgatccatattgacaaaaatagaaaaaacgacaagttagttgggaaagggttcctcctcagca  
ccggtcatagaaaagtttaaggctcagttaaactcagtaaccgatttaacagagatgcagcatcaaacatttgaaagaaaaaaaaataagaaagag  
gacatgttgagaaggtaattctttgattttctataaaaataaattccgttaagtccataattctacatttccgctgcgtcgacaagcagtgtaa  
gagcataaggccggttaaaggaaagcaatgtcaataatgggatatacgggttctcatttggagatatttagctgttgaaagaaatagagtggt  
cgagaaacaccggaggatttcggtcgaacctgggatgattccaccgtctgtagatgtaccggagggtcattctgtagagttgaaatcttggtggt  
tcagtaattgttgtaattgacgagctttggatgggtgctcgtgtcccagctgatgcatgagggtcccaggagagacgcgacaaaacaggag  
cttctggtccgttggtgctatcgttgaatcttttggtagtaaacgggactgacaagcatggccaccagaatgatagattgggattcttctggg  
atgagtcattcaaggtggaaaaagggtcacgaggccaggactctgacgcaatgaagtcatttgcacatctacttctgctgattggaattgg  
gggcccgatgccaagttcccagttttctaaaaacatttctcacatttccctcgtcaacgtcgaaaataaaactccgatgataaatgattcaag  
cctcaagcgaattgtctcaaacctatatgcccccttttcttctgttacctatcatccgactgaagcttatcgatacagttgtacaaccaagg  
acggtagaaaatagctttgcatcttgattgactgctccattatcgggtgctgtggctttatgcttttagaactatcattgagcttccccgagctcc  
atcgaggattgagattctaagtttgattgttattcccttccaaaatagagaaaatgctgggtccttttgaatctaccagtcaaaaaaacaatft  
gtctacttctgctgatatcctcatgctgttgaaagaacattgaagcgcaaatcccacaacaagagccagcccttagaggtccctataagcacca  
taagcaccatcagaaacagcaactgaagttgcagatcctcggtcaactggcaattgtacagaagctagtattgcaaatttccggttccaaata  
gtaaagtttgaccaagcggttactattactatacgaacgttccatcgtaaaagttgctgactccactgatgaattgaatcgtaatatccat  
taggaagcctactactgtgaacaaattatgcttctgattgttaacatctagtcgatgcacttgcagatccatcttgtaacagatgcaaatgaa  
tacgtgtttccataaagcaccgttaactacagaaaccggcttcttctcatttgcagagatggccgtataactaacgacattcacatttga  
aacggaatctggtgatcttcaactagttgcatgctgcaatgacccatctagccccaaagtaacaaaaataaagaatcagggttcaa  
taatccgtttatacctccttcttgacatttccaaattcacctgagtaacacgaactcctctggttgccattcattcccttgatgcctttattggt  
gtttgctcaaattagtgatcttctcttttgcgagggaaatagacgatcccagctaggtgcaacagcaggtccgaaatctaccgagttactgc  
agcctcggcataaattttgtaaggaattagttacatatggattatttctgtataagacgatttcttgacacttcttcaaactgagttcgttggtg  
acaaggccgcgaacgtatttgaggctgctgacattgtaggacttggtgctctagattggaacctttgagtaattataaactataatcaccca  
atttttgttttccaatcaatcccttgcagagaatgatccctactccttctgctatgtaactatgctcctttgattttctaataactgagttgaag  
attcattatcagacgaaagcagagaactggcattagaatcaattcttctgctgatctattggttactgcgctgaagattgcttcagacaaagt  
attagcttcggaagattaggttttgtaattgttttatcattcactcttcttcaaagattttgagttgacccgaaggcattggtcatgctggttc  
caacataagctgcagattccggtgaaaccaagcttccggttgcaatgcttagtataaatagagctgcatatttattgcatttgattccatattt  
ctgtaataaatatggtgaataaggagctcaggattccaaaatatcatttctggcaagatatgtaaaggcgattttggggtatcctttgctgatta  
aaagcaagttcgtttcccgtttctatcaagattccagaattagttattgttctgaatacatattcaggaagatttccaaagataaacaatgctc  
ttcttttatgccccaaatttttataatcaatccacttgcgatcgtcatcgttcaattcaagtaacttctgacgaagttaaaacagtatgtcctaaaat  
gaagagcttctcctaggtcgtaaatcgaaaatgaatacattccatcattcgtttctgtaactcaactgtaagtcacctatatcatcattgtt  
agactgattaggtgagcgaacaacttccaaaattcagagctgtaattctgattcagtaaccaatgtgttagcgttgaccagacggagcgtggaa  
ccatcgggacaataaagagatcaagttcctccagactattaatattgtggacgggagaaagtaatacggtaaaagtacaggcattaaaataca  
ctgtgatcaaccttctaaacacaggttaagtgagtaaacgacagaaagatgaccttctagataaatattgggtatgatggaaaaaggtgta  
aaataagatgaaggactttaaaggataactagtttgcgaataattgaagctcgataagtgacgaaacgattctagtagcgtttccagcaccg  
ggttcaggatcgaccaaagcttgaacatcaaggtagaatgtactcatcaacactacgagaaccgatgaatggcaaggccagtgatactttc  
aaaaaaggcaccatcgaagcatccaatcagatcatttaataatgattagatgacttaagatcagatcattcagcttggctttgccgaagaaga

cgcaaagagggtggaagagcacttagtagggatcttctgacaatagatgagccgtcgccaacaacatcgaaacgtgtcttctaccgtgacgact  
aaatcatgacgtcctgtttcaaatagcaattctgcttgccatgattaacattttcatattcagattctgggaaagataaaattctgcgtttctaag  
agactgagcaaggttcacaaactttgaagcctgtctcgctaattctggaagacaggatgcataagtagcacgacaacgacaattaggatcagat  
aaatatcttgaatctggaacaagatattctgaaatagaaatgcattaatagggggcgatggccgtaatttcttaacaagacgagtaatggtt  
atcagagcccgaatccgcacatctgtaaatcatcggaacaagagtcacaaagggtatacagatctaatcttgcctcatcaggaatact  
agttgataatatttctatagcttcaaggcattcagctttgattctctggtgctgacatggcgcaaggcagataaaacaattggcaaaaggatactg  
gcagcatatatggaagcttccgaaaattcgttatcataactttcattatttctgtatgttccctaataatttcagaatgcatacttccatcaaggag  
aatttcttctcaaattctcaaaaatagctgataccatttgcagaagcgaatgtcatttcaactcatcaggcaaggcgtataaaggagcata  
aaagaactttcaaatcattattcattttcttagataatagcgtgtcattagaaacggtagaaaaaaatcatcaaacggagataaatcattaat  
atagaatccactcttgaagaataaatattcggctgatttgcgaacgggctgtatatgtgaaaggggttgagggtctaataatttacaacagtaattat  
acaaggggacataaaagcattcaggaaatacagttctcagataacgcttcagataatagtcggctgtatcacgttgtgtagggtcacattgaagc  
atgttaatatcatattttagtatcttggctttaaattgacgaagcactgcagcagatgtcgtgaagaccattggcctttagttgaaagctgcga  
aagagtaaagaggggagacccttcaaaaggagttcgcaaaagacacagccaagctaaaaatcatctctggtgtcagaggagctacgtg  
tattttagatttggacaacagcgttcaggagcaatattacagacacgacgagaagaagatcgaaaaagtagctatagtcggccgggttatctt  
ccggaaggtacgtcggctaaacgagctgaagtcgatattgataccagttccatgtagtaccaacacgtttcagtttaattgtccatgaca  
aatccctcgttttagcaatcagagatgccttttagtaattggaacatgatccactttttcagcagaatctaaaaatggcgagtagatattctgt  
cgtataagttatgggcaacataaggacgcattaaataagcagcacgcaaggtaccagagtcctcgtgtatggaagaacgttgggtgattttca  
agaattcttctgttcttataatctcgggttaatatctgtacttttgcgaactgcaataatggcatgaatggaggggacgactaaccttgcagg  
gaattcaaatccggctcagtgatatttccggcaatttattcacgaaaaccttgattaatttctcattccctttacgttttagctatcgaaaagttcgc  
aaaaactgcgaatctcctagactgtattattttagaaggaacgtcaaaacaatcaattggtgtcaaaccttcttattatagtagtactcaggaagt  
tcttcagaaaaaactcatgaaattgggggtctgtatggttgataattgaaatcccatatggaaaaattatagcactatattttacatacttatacc  
atgcaagagccatgcgtagctattctatccttctgaggtgacgaagtaacagtaaatattgggatgggaagaaactgagaggaacagaattcttg  
aagtattcattgaaagattatggtaaagatattgtatgaaagcatttataatcattttgtcaaaactaaattgagcttttctttagtgcgtt  
actatccggtaaagtagaaagtagtaagtgccctggcaaatagagatagttgaaagacatcaagaccattttccagggtatttggcaagta  
agatttgttctgactcagtcgaagaaagccgtagtaagtcgtgataaatgcttcgatgatggaagtaatcacaggagcttttaagtttag  
catttgatttccaggatagtcataagatccgatagcacgagccatgtcctcgtcgggtggaattacgaccgaacacttccacgaattgtccattcg  
ggtccatcaagtagaaaaagacagaatggtccacaagatagtcatttctgtgggtcaacgtcttccggtgtgagaatagaccggaaatttt  
tgcagatatctttgatttgcctatgggtcccgttaagccaacaatttgggggtggaagtcttcaagtattgagcaatttctgatggaggatccta  
gcaggatcacaagtataaaacagggttcaaaaagctccaacaacgttgtgacgattcaatggcagcgttagtttgcattcatcagg  
acaaatgtcgggacatcagtgaaagcaaaaatagattatagagaacttcttgaagtcttcatcagttacttctcggccaggtgatttagaat  
gaaaaggggccaccgagtttggcctaccaacggtagacaatgcttttcttctactcctcagagcttctgttttctactttggaggtaaaaata  
caagcctacgctggtgacagctgctactgcagcggccgtacagaaagcatgcttctcaggcatgttgggttgcgtacgcttccagcaatcat  
cctacgaccgtcaaaacaggttcgaaaaggagaagctgttgagcgaacattggcttcaaaagactagcaattgacttgcggccaattgctc  
ttctacgaaacattatacaaaaagattacaagagtttccagccttgaaaaaatgtaagcctgggaaccgtaggaatcgaatttcttctcta  
attaatattaatggattactgcaaaaattgacttggagaatccgttctgtcctcaaaatggctgagtgacttgaatgactggaagagaagaagt  
catttggtaagtaaaggatttcaaacatacctgatcaaatatccctttgtatttagtactcaaaaattggaatttgaatgaaactgcattgat  
tatgtgattcaactgctgagttgcctttaggatccatcaagactttgacgttgtcgtcctgcacaaagcgttttggaccaggaacttttca  
acagaattcaaaaaagttagatttgaagattgagcttgttctacaagctcaatgattcaatgagctctggaaggagaggatttgttttgc  
tttcttctccgcttgcaccacgcatggtattggcaaaaagataagtaatttttctgtttttattcatattttagcttactttaaaccgaaagctc  
gactagatagcttctttagtagaaatttctgttctgactggaatgtttatagatataaacaacaagttcgttgttggagttcaaaagtg  
caagaatttctgtttagtcaaaattgcaaaagaaagcgaagaattgggtccatttaattgttataaaggatgtctacaaaattctggc  
agatccaattaatatcttgcattgttgccttctcgtatgcaataaatagacatgcagaaatggatgatgatttgaatattgggtcccgtat  
agttggacatcgtacaaatattggaggttcttctgctatttctgtaaacgaaaaagttgcaagtctacttaggaattgtccttagaaggtgt  
ctgaacgaagtcctacaactaacattcatgtagtcacgatgcatatttgcaggacgtaggatcttttagtatgtctgtaattgttttaactg  
tttctctcaagggatcagcagagaataggtttgttaaaattcaattgtatcgaaggttacttataaacgatactttattgctgcttctgcaag  
aaaaacgcttctgttttctacaccttactgatccatgagcttctgctcctttagtttactgtttgtttacgattaatatctacaagtgact  
ctctagcactattgtacatagatgtatttaataaaaagatgatataagttgaaaagatagacgcgggaagggaatgaatacaaaaagaaa  
gaatgacctatacaaaaaagaaatgaacaggggaaagattcgtgaggaaaacaattgttcccttggtaaggtaggaagaagagaaaaacggaac

ttgttttaaaacgaaaagaaagtgagcgagtcagtgaaatgagaaacggaaaaaggatcttctgctgaaacctgaaataaattccatttcaac  
ttgaaagcattataataacaacattatagaaaccaatgataagattaatataaaagacgacaaaaaataaaaaacaaagacaag  
atcctatacagaaattgaattttctgctttgtttgttacaagtcaacgtaattcattttacgacgacgctgatatcctgggccgatccagggtag  
gaatatgaaacagatctagtagggtttcattcatgatttccgatactgctagagctcttttacagaattaacagaggacgcttggatactgt  
tgaatgttctctttttcacttgcggaggagtaggatagcgtgttagagtagcagcggtaagcgcgttttagagtgcttattggatagctacgt  
acaagtagcaaccatttgtaccacgagtaacattcaagacatgctttggagggtcgtcgatgggaaagcaagtcgtgcttgagattggga  
agtcgagttattggaagggtcattttgtaacaagaatagagtgagttatagcggaaaaaagtaagcaaggaattgattagaataggtaggaa  
ttggcccctacttatagaaaaccagcttggctttcattcaccaaagcaaaacaactccataatgtaacaataataacataaagtt  
agcttttaataatgtaaaaagaaagtaagtgtaaacatggtaaatattctaaatggttcacagtttctgatttgcctaaaaatagttttac  
atgttcaaaatcattctattttcttatattatgttttaaaacctttacatcctttggaattcaaatggtttgcttgggctgcctatggacgctca  
cgagcgcgcaactgtgttgacaaacacgacgctctcagagttgacctgacagtttctcagacttgaaaacaaggtaatctattatttt  
catttaagtagattgaatatccacatagcatatgctgtcaactcaagtttaatacaaccttcagagggtcacattacatgagtaacaata  
tcatattaaggacgatgtaaacgaataaaacaacattgaaaagaaaagaaatccacatgcaaatgtacacgcttttgatcgaatacagagct  
cttaacttaatttctcagcttatagttactttactcggcctgctgtgggaaggactgttttctgattttacaaacgaataaaacaaggggtccaagt  
gaagcttactttgtagcattctcaactgaaaggaattgctgttcagagccattgttaccgtgaacagcaagttcatacactggagctttct  
ttatgtcaataccctggataatcacaataaaaagacaccaataaatgctgctgtaagttttcttagcttctttaaaggatattcttgacat  
ttataaactcacttctacgtagtttctttgtggtttttttcaciaaagcctacaaggagcaaaaataaatgaccactaagtgactgaacact  
tgactcaagatttggaaatctcactctaccaactgagttaaagcggccttgaaagctttgacatttaataaataataaagcctaaactccat  
tgcagaaaaaaactcagaattcaacatacacgactgcttatataatagttttgttttctgctacatttctattttcatttttatttaccaaatagta  
caaagattcacatcgcaagaggctgtttattcttaaatctcaactaatcttagattgcatattttctagctcattcagggcactgagttcat  
aacgtgtctgctggtttgtagacatgggcaatttcaggaaacaagagggtcatcaggattaggatcagtaagcaagagcagattgacaaaag  
gaccttcgagattgtcagtgctggtgaccattgatcacgaagaatgtcaaacagatgcttccgttggagttgatgtgggatggtagattctggta  
gtaaagttcacctgaagcaggttagtcagccattcatactaaagatttctgctgaatcaaaaagaaccgaattgaaaaccattaaaaagaacac  
tattcaatcaatattcggccatttaaaccatctttattaggtctgaaacatgactccataatttgccttcattaagtgtgtcaaatccaatt  
cgctccggactggcaatttttttcttctgaagtcggcagctagttcattttttgttccaaggcgatatttttcttttcttctttagcttt  
aattacttaccttgggaggcttgaagggttagtcagtgaggaaagtgaattgagagaaagaaaacacctccggcataaggactatcagcctaaa  
acatagttagcaaacggatccaattttataaataactaaggaaacccaactagaaagcttccggacattcggccaagattgatcacttacagg  
tcccatgatagttgcttccagtggaacaaatcaccacacagggccagctgagcaagaggagggtggatcctttcaagatcagcaagctca  
cggtaattcttcaatgccatcctaactgtctaattgtggtattctgttacagttgtggtggtttgttcttggaaagattatggagagtaatagaatg  
aaacataagaacaaaatttattctgctcctgggttcgaatctcgtgagcgtttttttagcgtgctttacatactatacgttaaggtaacat  
gttaacgaaagtgactcagcactagtaaacaaatcgttcggggaagaaaaaacattgatacgatcactctatttcatgtacgtttacgttaatt  
cttgtatttacaataaacttacaataatgaattgtcattgctttcattcaactgtaataaatcttctataaagacgaacaacgatttccaactt  
ttcgaatttttttaaaatcgcccaatcaggtctatcgtcatcaaatcagcctcagcatttctttatccattcgtcagcagcttcttctacatc  
ctccaactcattttgtgagcatccatcggatagcgcatactctcagcgtgctattgaagtgccaaacaaaattgaatgcttcatgaaatgct  
tgctgaggtgctcggtagaataatgtcgaatgcttctgactggccataaacgattgtgtgatcaatgcttgcataattacaccgtctcgaat  
gcccttagcaacaataactcggcgttttctcactgtccaagcccaattttatacacacgtctcgaaaagaaactcgggaatatgacaaagaaat  
cattctcaggcctgtcttaatcaccgtatggcgtaatctacatatcagtgatgcaatccgtcataacgaaattcagtttcatatttgcacaatgcat  
ctgtgaaggcattcaagtcaccaattcgacagctgactaatgcgaagtaaggaatcaatgtttttccaagattttgacggaagattcttct  
ctcgggaatctctccatgagcaactgaacaacaacatgcaactgttaaagcgttgaataaattgaacggcataaatggattcggagcctttc  
gaatggcactaccaagtggtcatgagcagttgtataatcactgaatcgcgcgaattcgtccaaggtaaatattgataacgaattgccaattgt  
tgcttgcgttgaaggaaatactgttttgagaccaatcgatctgcttgatcataaagattgaaatgaatgtagttgcgcaaaagcaaaagcaaaa  
ccatcgctgaattctgtatcatgacgaaggtgcccgtccggtgactgcaaaaagagattttctgattccacagaacgattgcaatttctcaag  
gaatagggtatagtaaaagtaaagtttctgcaatctgatccaatgtacgacgatcaaatgactgtaagcagatgacaacctttaccatgtaac  
aagcaccatcatcatattttcattataaaataacgttacgccaaccaaatgcaatacatgctaacttctggaagaacagcccccttgccttc  
actttcgtccttggtttcatccatctgaataccatccagccaatcacgctgagaagttctttttcgttccaggttcagaagcatagatttcttgata  
agatggcccaacttctgacagaaaggcagcggctgatgtggaagttgttcttagagcccgatatacaagcttggatctctttgtttgtagctt  
gattaaagcaacaatattggcttcgacatctgtcaagcattagcattcatctttatgcaatctatttctattttcataccctgtaaagctgttctgg  
gtacttcagcttttcttctttttgatctgctggctcgtctttccggttgcttcacggaatctacctcatttctactctgatttagcatatgcaagtag

actaacaatataattcatacctttatattgatctgccataactatgtatttgtagtggtcaagtcaaggattgtgggtgatgtaagagtatcct  
aggcttaagttcgattgttaccttatatgtcagtgagatacttgaagttcacagtcataaaaattaccgtcaaataaaaaactgtttatttatta  
aagaaaatctatgaatttagtaaaagagagaatttatctaggtatgcttcaaaagagcggcaatataataactggaggcttcttagagaataa  
accaaacacgctgtatagattgagttattaatacaaaagtcattttctgttccatttctttataaattcacatttggaaactttatgataaaac  
atctcatatcatacttgaataacaaggcttggcattatcacttggagaataggcttgcaggaaaaacaattaataaataaagtcaatctgtatc  
aatctgtttatagctcatccatctctccatattctgtggtgatcttgaacagaaggtaagaggtgaagactcttctcggcagtc  
ctcaacaacgtagcaatctcattatcatatgtatgcttctcacttggcgacgagcagatcaagcttctttcttctgcaatggatttggcac  
aaatcaatcgtcttggctttttcagacttctgactgcaccaagttcacaccaagccattcttgaggaaagttagtagatggggattagatgtt  
gaagattgtcggtaagtcttggctaaatttgacaaaagagttagggtcagccgataacaattgatattgtctacgaagtaaatctctcgctcat  
tttcgaaaacgatcaagatcaacaacgtaaaagagcattatgatatttaaggccacgaaaaacttctccaataaccctgcttcaaaaaac  
gaaaaccttccatctctcagagaatcacacataggagtataaccatacggagcccatgcaaatccaagtccattaattctgtagatccgtac  
ggacaatctgatcggcatccacaaaaataacctatgaaggtgagtggaacaaaaacatccaaaaacagaatttggatccccatatttctttt  
gtttctcatcctgctttctcagccattcaggccaattataagttacgtactcatattcaaacccataatgcttagacaagactgggattgatgtt  
aaagaaggggagaggaaatttcaataaaccaaaatttcaactttttgttggatgttgcataaacactcttggtcataatgtacataaaacgctcat  
ataggtgtccactggcaaccgaaaaatgttgatggctggttcttttccaatttataaaatattaacttttggctcatcttgcagaatctct  
gcggactcatgttctccaatattgtctgaggattcgaacctggatttcttgcacacggggtataaagtcacgcttcaagctatcaactac  
cactgtttcttctcactaggtatctcaaggctttaatattataaaatgagagggagcgaccagacaacggttccagttccaataaccg  
ggattagcttcaactgaaagtaacctagattcgcagaacaatcgtgtcagcaaaatgctcctgttttgggttttctaatgccaattgcattccccg  
tggtggagttttaaacccttcttgagaataacctgtataagaatgttcttgatttataaacagccgaaacaggttctacatttctcaggcga  
tgtatggccaacttaattgtaaagatctatgtcacttcttctgcactaccacgtatcacgagactcaatgtccatagtaagaagagta  
tctccggaagtgtataaatcgtataagtgatccttaaatgtccaccattatcgaaaacgggtcgtactcaattgagtagctataaaatctag  
aaagggggaatcagaaggttttagaaggatttaaatagatacgaacaccgacaccatccaaatgagaaattgactcaagtatagatgacc  
atctctgtgaaatcttagagagaggatctaaagatagcaacgaattgatacatacaagagctaaaatttccggttctatggttaaagactcactg  
gcaactggttatagaaattgtctctaggaacatagcctttcacgtccaggaacggaaccacgtacgtaatacaattccaacttttaaggtagg  
aactaagcaaaggtaaaatcccttggtttgaagttggctagcgttatcaagcatattatcaagttatctataaattgcttttcttgagagag  
agcatttcaagatcttcaatccaagttttcaatagaaaacgaattaatcaatcttccgttagtatcagcatcactgactaggttcatcaatgtt  
gccaacaatagcttggatacttccgtatatttagcaagttcgaacttttacttgtcaacttagcaggcttttctttcattattcttaataatt  
ccgtaaatcttctcgtgggattagtaggaacttaagtcagagatcaaggtcggtaattcattatcaaaagtcggattgaaactaaataagatt  
gctgcttccgaacttgaagtagctcagctagcatagaggtaagtcgaagtccttcttgaagcaaaaatctgtaaccaacaaaagtgaactt  
tgcattttattccaacgggcaagagatcagaataagtgaaagcaatgttatctagaagacttaacaaatctattgcttacttttattttgaag  
atggatgaattaaaggttacggatattgtccgcatcctttaaagatagtcgaataaatttcttcaagtagcatttggtagccacagctag  
ttgaattctggaatattctgataaataaccatacatgttactgtcgaatgcttatcgtgggctataatcgtccgttaacgataacatctggct  
ttctggatcaatcctaagcgcgaactccattgaagactcttcaatagatcgtatcataaataattggaatttagagatttcttctcagggaaacg  
tttcttcatcataatcttcaacaggcatatgctcttgcagaagagccaagcaccggcagatggatcgttgcagacacttaacaaaaattga  
gggcatgttggttttagctagtttgcacaatagtggaatgcacgacatctccttaccaaattcatcttccgttctacacaaacaagtcca  
gtttgaacaggagaaggtcagcagagaaaactgaataagctcagagagtagtgaaaaggaagaatcactggaaggggaaaataggatatataac  
tgtgtgcaactgttctttagatgaagctgaccgggataaatcgggttaacaattgcatattgcttctaggccatttactatacctagtatcag  
ttcaactcgttcatcaaaaaattgcttattgtcttcaaatcatcttgacaatgaaatcgagcaacttaaatcagcttctgagatcgaatt  
gctcgttggatagaactttaggcttttgaaggtctattccaatttctgaaatctgataatattgacgcttcttccgcaaccaagacagaatg  
gtaaaagcatcagcttctgaaggtcaatagggtccgttccagcacaacggcattttgaccttccaggtatcgaataacttgaagatttgacat  
cttcgataagatcctcagaaagtcggacttttgacactagatgctgagcacaattggaaaatcttgaacaaggagcttgaaggttcaagggg  
tttctcgtcacaatagcttccgtcgaagcacaatccaaagtcgcaatctggtcttgagtgacggttcaagttgatcggaggctagatcgaagag  
aacctcgttttctcatcagatgagccaactttttaaatttcttgtttaaagatattggaatttctcagatcatccattaccagataatcgtacgct  
ttaaagaggcatgagctcgaactactgacatagagcttccatagtagcattggagcaggagcatatcgtataacgtaattacattctttatt  
tttgcxaaagatgagtaaggtcatggaatctgtcaaatctgttccaaaatcggtaacgatgacggcgaccggaagcgttctgagaagtaag  
caacactatagcaagaggtgtaggtgatgttctgtataaaaggaaggaacctgaggtagatcggaaaaacaaagattcgtttgatcgtta  
aaaattgaaaaggttacaacctcaggatgagaagaacaacactgctaaaagcagccagcttgggtactccacttaataacgcaacagaat  
aagtaaatgttgaagcttcttgggataaaacattatcggcctttaaataactgaaacggtcagattgtacaaatgctcatccgtcacaagcgtc

cgttcgaatcaacggtaaattgtctaaaaaccaaagaaagctgtttctattttctcatatagagattcagctaataagagctacgaatgacggcttg  
ttgaatgttagagaccctaacgtctataggttgccagcaaaaacaaagtgaaataaagggaataatcccagccatagctccatttcattttg  
ataaaagatcattaacagattcaaatctgataaatgaacttgaggaatggctaagatcagtaacatttgatcaatgtgtactgaatggggt  
acctcagaatacaggactgtttgagatcatcatgagtaagtggaatgtaaacacaacattaagaaatagatataaaattaggtttgtttct  
tttattctggtaagaagggtcacttccaattggtttctatgctataaaatgctgatgtttggcaaacctgtattcctagtctacagaatgaa  
ataagtggatccagacatagattttataaataaaaattcattcgaatgaatctgtaattgttaattgggtaagattctaaactataagggtg  
gaactcatacatcttgcttcagactctttaccataaacaggctttgttctaagaatgttgattgtagaaaatgtactttgacaaaaataaaa  
atacctaattcataggagacttctgatcattgaattattgccagttacgtttcctgtagttaggtatgattccatccatcaatgagtagtatagtt  
ccatctaagattgtatctaaatctttactaaaagtaacatcagcttatgcatatcaagcctaacagccatgcgatcagtcgtaaaagtcacttcg  
aagattttcaagcagcctatattgagtttcttcatccagtaaacagacagactaagcatttttaagcattatctgctttctggagaaggaagt  
gcgtagggatgtactgcttcaagacaatataagataacaaagaaagaacgcaggcagttccatagggacacccctttcaatgggtcgaatgat  
agctagaataggatgcatataaaactgttaacctcatagcatttctcaaccaccacatagctgaaagccactgtaaggatcatcacaatag  
acagctgaacgacaattggaagggagtagaaaaacagaataatcaattaagcagtaaatagtaggcatcaaatgaacacttaaatcaaaagt  
tcaggggcaattggacagccctagtttgggaatgagcagactacggtcgacataacaatagaccagtatagaactgtaacgattgactctaga  
ggcaaacacatataagaatgcaggcttaattttgtaaaatccttcaagttgtgatgtctgtagtaggcttaccacatagtaagtaattgttc  
cagccagggacaacatcgttctgcacttctgtagattctgaaatattggatttaggaataataaaaactatattcttagcttacaatgctgaaag  
taggatccataggaattcggatcaagatcaccgtttttcgaccaattgaatgaccataaaatactagcagtagctatactgtgcagcagg  
aatgatttaaacgagacttgaatcctttgatgcttttacctaattgtagtattaattttcctctgaatgatagaaaactaaaacttaggaggatg  
aatcgaatgattgggttatcgaggtgtgttcaaaaacggaagtaataattcattatacaagccctgattataaatcataattattacttctgtt  
agttgaaaatacaaatgttatacttactttactatactttcattaaagttacatggatcataaatcttaataagcatctatgattgaattcgaa  
gttagcaaaaaatattaatattttcgtaaaataagaaatgtaaatgaaagtaaggattcatcctgcgcatccgtaactgctgatactatg  
tacaggcttaggcacacagcgttttagatacatgtatataatgtatgatacgtcgtaaacaacggccacatcaataaacaggagaccattcaa  
aggaaatgaaagattttgcatatattttcaacgtaagtgtaacttaacaaaaagcgtcgtccggtgccagttgtccaatagctccaagat  
cacaaccaaagcaaacctcatttgcagatgccttatgatatttagcggcacagacagggcacaataatccttccagatagacgggtgct  
aatgtctttgcgcaaaactgaattcgacatgtggatcatattcaacttcaaagcatcatgaggatttctatcccctaaaggtgatagcaggtcgc  
cctaataatattagatatacaataatttctaggtaaaatacacttacagcttcagcagcaggtccagattctgccaactcgagtaattttgaccaa  
gaaagaggccgattgttaattctttgcttatgagaagcattaattgctaacgatggcgatgatagaatgaacaggttgcaacttggtatgac  
aaagtaataggacaattcgagtgacgcttaacttaccctcaggttaactgctgcttccaattcaagacaacacaataatattctcgaca  
ttcgtccactaggttagacatctgtttcatgttagtgatcatctcccaatataaattgtatgcatacctcttcagcttctgttattaccagctac  
agaagtaatcagcagataaataatgttaagcaagcctttggcctccgaaatctgttcgctttactaatcgataagcttctgtaagctcattat  
tcttgattgattccatattcagagaaataaaaggtagggcttgattacgctcagcagcttctccattacgtcgaatgtaaacgttagaggatcaag  
accatcaacagcgggtaagtaagcttctgatgcccataaatttcaaaaagcagatttaagaggagcaagtttacagctccaactgtctac  
caaaaagttcatggcactttcaaaaacactgcagcagatgatcagcagctaaaggtgattcttcaaccacaagtggtctcgtctgtaccat  
caaaaacgcaaacctcgtttcaacattcgaattacttcttcagcagccagatcttcaactccaaccatcatcttctcagcactctcagcagat  
agttcgtaacatcttcatcaactgtaagagatcttctcagcttctgaaattcattaacagaagctgtttcatcttcagggttttcaagccatt  
tgctctatccggtcttcaataacttttgaatgaggaatcggaagatcctttagagccagttttcggtatgggtaggcgaagaggggaagggc  
aaagtaaaagaaggacaatgctgggtaaccttattgatcttattaacaccactaacgatcatcacttcagcagccttcttctaaaccgtag  
acttcgagcacaatgctagcggatcatcttggcttcaaccaatgtcaatacagacttctatcattcatgtataaagaattctgaaaaag  
acttaaggcatcattacgtttctgagcaatcatagccatcttctgtaagtttctcggttttccggaatcaaatataaaaatgatagctttcgaaat  
aacgaagcttctggtagtaactcagcaatcttattggtttccagaattaagggtcagaagataagcagaccaaaccctcaggtctatcaatcg  
tacgagcaatttcaaaagcgttttaagttattacattgtaagctaactcgaaccgggtagataaatcttccacaaaattgcaagcaatctcgg  
gtaacctttcttctgtagataagcaataatagcttgccaaccaggtcactgtttgaaataatgtaaaacctgctcatagctttcttctgatcaat  
gtaacttaaaaagataatcagtaggatcaatcttgattgttaggggtgtcggcagattcaaggcaaatcaaaatctccttagcagcaca  
aggtaaatagtagaatccagagttttgacaataccacaatctccagacatcaaaagatattcaaatgatcaagagttgataaagcaagacatt  
gtttcaaccaaaactgcgcttttaattcggatagttcatggatggaagtaataatccatggatttttaacaatgtaacaaaggttttctat  
taatgctgcatgagaaggtcattagaccaataacatatttaactttgttgccattcacagaagcaataaccttctttgtgcaaatcaaacatg  
tgacttgggttaggtagaagaagatgtccattccagcataaaaaatctcgtttacctttcgggcaattcgattgtcttctgttacctgttt  
gtcaggctttaatgtcaattagttgttctacgattgaagcagcgaagcattcgtgcaacgaaaagtgcggtatcgccggagcccttgatg

ccttcattgacttagaagaacgtgacgacaaattaacgagctcgttaagtccattatctatagaggagttactagtcaaccttctcggcagga  
ttgtaagataaagaacgaggatgacccatgggcttccatgatgcttaactgaagccaaaacattgctttgacttctgactagatcatgagaac  
gatagacttatctttgtgacataaaggagagtggtgatgttcagagcatgagcaggacgttcgctctaatttgaacacatgacaccactgtc  
gtgagcagcagcaataaataagtttggatgaacggtgacaaacaaaaacgatcattatcacgacggaaagttgaaactgacgtccttctat  
tgagatccaaacacgaattgtttgtcttactagcggataaaattaactcttgggtgggatgaaagagacagcaagaacgttgtaaaatga  
ccacggcaagtgtcaactccaagccttagaagcagtcatttccaaagtttatcaatcgatcatcaccagcggaaagaatgagaggaagcgt  
aggatggaaagcacaccagtttagcggcaggtcatgacctttaaacaatttcacaactgcgtcggtagtccaaacaaatcattcgttatgg  
cattctgagcttgcaagctgcttcaattgacatactgaccggggcagcattttcatgcaagaccgctgatcccagacacgcactgtttg  
atccaaactgcaactaaatcattccttggatgaaaagcggcgacataacataatgagaatggccagtcataatagctatacaatttc  
ttgattgccagttccaaatcggatcgtttgatcatcggaacaagaagaatccaagggtattcatggtgaaaagcgaacacgaacataatc  
catgtgtccacaagagaaaataaacttcttcttataattccatacattaacttgaatcatcaccaccagaaacgaaaagcggctgctg  
gggtggaatgcaattccacgcacaggaccatcatgtccatcaatcgatctataagagttccattcgatagtcaccacaattgaattcaccatt  
atgcaacgaagtaaggatccaaggcagagtcggatgaaacgcgacccttggccctagaagatttagattcgaatttaattagcatctccattt  
ttataatttcttggagagttcgaagaagatgctaactcaccagttgtttgtgtcaagttactccagccgtcagatgtggtgtgtctttacc  
gcggtgatagcgtggttaaccctcggctagtcgattttctaagatctatgagtagcggctatttgcataataaaatacaatacaaaataatta  
aataatattcaatttattgataacagttacggacgtttattcattgttatttgcgatttctagttggtaagaaatattgactgatactca  
gtgctggaatagaataatgaattacaaggatgattatctttataggatttagcaaaggagaaagcggtttcataattccttcttgatttaga  
agtactgcattgatagcaaacgtttccataaatcatatggagctactactggctgtaattacgcttttaattaagaagattatttcaaaacaa  
cactcttacttttccaaatataatagcctcagtaaagcaataacttattcttcaaattaaactggagtaataagtaattatcagcgaaaaaa  
aattagtaggaatacgtttagagcttcttgcgatgtaatagctgacgaacaaaaaaagggtttatgccagtttggcataaaattgagc  
gaaagataaatcattaggagttcaaatatggagcttaagtaatgacactaaaaaaagtttagcatgcagtagcttgtaaaagcctcattttgga  
tgcgaaaatgcaagttcataccacattgcaggaggtttgggtgataccaataagctccactgtagtaacagtaggcttagaaggaggattatt  
catcaaagaggaagagctataaatgctggtattgttcatagcgtccatattgcagttgaaatgaaaaagttcgtcctggccaaaaaaacaaagta  
agttgttgcgaaaaccagatcaagtttggatgaaagattccgcttagaaggatcctatttatacctgtatggaaggattgtttttatttagcccc  
gactctctttgtttttattccattcttctaaacaaagcgtccattgtcgaaggaaatcaattatgtttgtagcctatatcaaagcaggttaca  
caaaagtcaagcttgaagaatataagaatttcttcaaaaggataatggctttagatagagttgcatacaattttaaagaagataaatatgg  
gatccaaatcgggaagaacaaattcaaaatggagaaaaagaaatctaatttaaagcttcttttagtactatcatcacaagatttttatcc  
acgaatcgatgttttcttcatggagcattttcatgtctagctcattaggcatcgtcgaaggcaagcttagatgaattgtcaagcttttttgcgca  
aatttcacaaattcaagtataacaagatgaatagaacaagcgtatagatacgataggcttctgctgatttttaaaaaacagaattatattcaa  
atctcttctgattataatgagttcttataaaaaattcataacagcgcgcaaggccaaagctgagataaagatcggctgccgtttttatttctt  
tttttttttttttttaatttcaacttgcaggataaagaagatcgtaaacaacaacattaatagtttcgagcaacgacttttctgccacagcat  
gtaaagcctgtcgggcaggtgaatccggtatacactgaattactcgtgggctttttttagtaatctttgccatttaacagttgattgtatccgt  
ctgactttcaacaagctcacgtcctttttcacgtcagaaggacaattaagcgattaatcaccattgctccagttccggatattgcttccaggca  
aataatacaggagcagttgcgagcctaggttaaatctgcattagcagctttccaaagtttctccttggaaagtataatctaaaacatcgtcca  
ttaattggaacgcagtaaccaatatacgaccaaagtcagaagcagctgtataacagtaggagagcattgacctaagatagcagcagattgaca  
gcttttcgagataaggcttctgttttcagatacgtttttcgatgtaataatcaaaatgaaaagcctgtcctccaaggtattgtattgactgtatt  
ttcagctgaagaaactcaccacgaactaagtcagcaacgactgttcgaataactcagttactcttgggttcgtaactagccatgccgttgac  
gctcttccaagaatgaaatttctgtcaaacagatcttccggtttccaaagctacgttactggaaggatgtcctcagcggacactggcatggca  
attacatcgtcgtgcaacagactggcagatgtatcattccgtgatctgagctagtcgaagctgagaaggtagaactgtccagttgaaatatt  
ccggagcgtcatcttcaaaaagcttgaccaacaagagattggtcaattccactacataaactcgttgccttagacatcagcaggactaatgaa  
ggctcatctgcttcttctgtcaggtatagatctagagcattttgaaagttctcaaatctgaggaaagtaatttccgattcctgggatact  
tgctggagttcatttcaatgagtcggtaaaattggcagcttactcatcgactggagaatactacaaaactggatttctcaagtcactgactga  
atgataattcaatatacattgtgaagcatttcatcttttaagagtgagtggtttcaaggaggaaaaactcacagtttctcaaaactgggtg  
gagctccgatacttcttagataatctaaatgcacttgatatttttagcagctgctacacctgcttctgctcgtataggtatgtagcag  
tgacatttaggtagcaatgctaccactggttagaacgaaaactggaggacctaactcacttagcaactactcggagtcacgaagaag  
ctgggagatggaagcaggttctgatctggatagaatattacctatagcttctagagcatttctgtgaaggaaacaaagattggaccttggcgt  
atgtaattactgaaagtgatagaggagatgagaaaatcatcagaaatgcgtagtcgcaaggcctggcggcttgaaggagcagaagaat  
gttctggaatggtctttagataattgtgttagtaaggccggaaggcttccaaactaatttggaaactgaaatggaaggcaaaatttccaac



tagcacaaaattagcacagaagaatcatcgattgactatcaattcctggcccaagtcgccgcatactcccttgacagcataatgatgctgctc  
gaatgatataaagcagccaagaggagtacaatcagagacaaatgttcagcaactcctcgctctatatacaccacattctccgctcctcat  
ctgctgcttaaccgagttctgctgtggggattcttctactccagcttaaaaaagtattcgctgctggggctgtaaaatggaaga  
tccttttgcttttcaatgcatcagctatgaagttatctgattctgctcagcaggtgctacaagcacttcttccctctcaggctccccgaatt  
acgagcggatcaaaccattttcaggaaaatctcatcgttgctaggcctcctcccacgcaacataccgtttctctatctctataccactaac  
taaaggtaattcgtctgctcagaccttccaccaccagccttcagcttcgccaccagctctccaaagcttacacctatacccacatcatat  
cctctgtctcctttgatcgacaggcattttgaaaggctcaaagtcactttcgtccgatactaaccgtatctcgtcagcgggtcttctaagtgct  
catgactttactccacttctcaagtgatagaggcttctacaacatcaccaattgatccaaatgatactccctttgtaaagcaaacgacccaaa  
agtcggcttcgctccaagttcacttctcgatttaataatcctcaaacgataatcccttgagtgattttgaatctgctataatgagcgaattatt  
caaatcacgagcctgtttatggctcagatattgctggattagaagaagctaaaaatctttaaaggaggctgtaactatccattttgctggcccga  
gtgtttcagggactgctgaaccggttcaaggatgttctactcggaccctggaaactgtaagactatgcttgacgctgttctacggaa  
gcaaagcgaacttctttcaatctctgcttctttgacgtcaaaatgtatgtatgttagtttagcgttcatttttctttttttttttttttttaa  
cctatatttagcttggtgaatctgaaaagctgtccgtgctcttttgaaagtgcaagcgcagacttgatgtcatttttggtatgaattgatt  
cgattcttccgcagaaacgatagtggaatgagcacgagagttcacgaaggtgaagactgaattcttaattcagtggtcttctctccaacg  
ctgctcctgataaagctacaggaagctcctcctgctgttttggtactcgcagcaactaaccttccatggtgattgatgaggcagcacgtcgtcttt  
gtgaaacgaacctatctctctacctgaaccagaaaacgctcagatctttctcatttgctacataatcaagtcactgtcttgggctgatg  
attdaatgaactgttaacttacagaaggtaaatagtaaaatgtaaaatgttctattgttaacggaaaattaggctattcaggatccgacat  
aacgctttggctaaagatgtgcaatgggtcctctacgaaattgggtgaggctttattaacgactagtctgaacagattccgctatagatctg  
aatcatttaagctagcttgaagacaatacgcactagtgttctcagaaggtattatcgttatgaagaatggaatcagcaattgggttctcaac  
gttaaagctattttaccaccattccaggcagaacttcaactaaagataaaaaatcaagcattccctattcctttctctttgatattttgggttgt  
ccttttgatacaagctattttatcttccatcattgaaactaagttccttctttcttgcgatctaaagacataaagaactctatttatccat  
acctcgttctctgctgagttcttctgacttctatcatgtaatatcacaatttaaggcatttgatgtttcagtcagcaccttacttatttaacttt  
tttctttgaaatcctaattctgatatgaagaagattttttcgaaaataagagcgcctcctgttgcaaggtgctttataaaataactttcatt  
atcatctttatcctgacttctttcatgctcagactttgcctataaaaataacttaattcactatgattttgaaattgaattaactgtgcatacgcatt  
ttaattatatacttattttgatcttctagtttcataatatacactattttagataaaacatgctggtcagcagatagaagctgaaacacacttgc  
atcgtaaacaaagttgatggtgttcaaagctcaatcaagatgtacacttttaaggctttaaaggatgtattcattataatggaacctacttcat  
ctaattgaataattttggctctttgttctttatgtactcgaaggaagttcagtaaatgttgttaccggtgttacctaccgaggtccacaggctca  
ttgaatgattccttctacatggcaggtaaaaatcagcttagtagcagaattcaaggagagaggtgtttttgttttttttttttttttttttttt  
tttttttttaaacgctggattgtgatggttccaagatcttcaatctagccgcagaaggcatttaagaagagtgaaacgagtgaaatcacagaa  
aggattggttctcaatagcgaatgagcgaattgacgccgtcaagaggacaatagctgctatgacggtcggtaaagcgtctccagctgtttcc  
tgacgtattgaagaatttagcaaccgagacgtaacattaaagaaatagtgatttatacttgattaattacgcaaagactcacctgatttatgt  
attcttgcggtgaatacattgtgaaagattcagaagagtataatcctactgtccggccttggcgattcgaactatgggctgtatacgtgttacca  
aatcattgattatttagcataccactacggaaggctttaaagatgatccatattgttcgaaaacagctgccgatcggttgtaaaatggt  
gaaatgacacctcagattgttctccaatggtttcatatccagcttcaggcgtggttacggaccccaatccagttgctgtgtaaatgagttcg  
ctcactgtgaaatccatgatttgagcggaaaagggttactttaatctggtatatactatgaccgatcgttgatggtgagcgttaagtgatgc  
aatgaatggggaagaatagcaatcctttccgctctttctgattccgtaactagcgtatggaaggaggcagagttatctgtaacgtgtcatccctc  
aattccaacatgccaacagcgggtgctgactggctgctgtgaaagtaattatgactcatattcatttttccgaagattttaaacttcttatat  
aaaaagatggctcctcctctccttacactttgtctgcgatccagaaatcaatacgttgacttgccaatattaattgattcttcaaaagcaac  
gaacttttgagaaaggcactcgcgtattttctgcaaatataatgatcctctttatataaagcttgagaaattgaaaattacaaatgctcgcac  
gtgaggaaaataaaacgagacactttcgaactctgacttatgttcagaagtagacttgagtttgtaaagcagacaattaagctttgggtg  
atgttcacttaaggttcttagcataatgaactgactgctgtgttttagaaattttaggttaataatcagctataggtgcaagaagtactg  
ttgtatgaaacgcttttacgacaataccctaaaaagattcgcttttctccttatcttgaaggtgctagaggaactggagacccgagc  
tcgtgctagatggcttgatattgggtgaattttgtgattctgctcgtgacttactaagcttcttctgaaatgggtgctactatcggtcaggaaga  
ttacaagtagcgtgctgttaactgccaactgcaagttgaatcttactgctgaatggcgaacctgaagcacttctgagaaaagtattttctt  
attccacaatgtatccagcaatcaagatttgcgggatcagcttctatgtaccagcattaatgacttctgaaaatagataaagctgcttccat  
gtttgttcacaaaagccaactgtcagcagataataccaatttccaagttactattggatggtttgctttcagaaatgactaccttagcatctgtct  
atcacagactccagagtcatttatcgccaaggaaaattggagcagatgctattcaacaacgtgctgttgaagattgaatgttgaagaggaa  
aacgctcagactcagatcgaaaaagggtgcaaatgtcgagaatttactagaccttgattttggaggccaaggtactcctactcctctgaagctgca

ccgtcaccttctcttccaataatgtattagattatattatgtccgttgattctctgcaccgagtaatcagcttccagcggcaggtcatacacggctc  
gcaacggaagatcttctggattgtaagagagcgtatttattgaaagattgattgaaacaaaattttattccgcatatcgctgtatcttatca  
tgaggtaatatctcccaccataaaatgaatttcgtctggttctaggatcatagtagaaagtaggtaattaatgaataccttaactcatg  
aaaggacgcattatgcatgattatcggtgataatctttcctaagttcttttagattcttttggctatttctactgttttccaaaatacaagaggt  
ttacacatcttttaacaaacgtgaacatttcgtgatttatttaccgtagtgtagtgagtgctcttccactaccgcataaataatttcagtga  
ctggataacctaattcgtcttttattttgctactttgggaccaagaaaaatacaacaaactctttctttcaagggaggtgaagatttgc  
agtaaacgaacaaataactattttcattgtgaaagtagcttaagatcgcataagtttttggtagtagtctttaaagctgcctaaaacgaaggcc  
tgtttagttacgagaaaactgaaatcttgataaacgacaaaaggattttaaatacatttcgtacatattttgtgaaaatctatcatattgaaagt  
ctctgggtgctctgtgaaaaagaggagtaaacacttactattatattggatcttttagttgtaataagttttcaaaatgagcactaaatcgtcga  
aagaagtattgcaaaagaagctccatgagaagattgagaactttaggctcaaaaggaagattccaaagacactgaccgaaaagcattgattca  
agcacgtaaggaaaaagccgaagcaagggcacaagcaaaaaagaaggcaaggaagctgtaggcaatcagaacaaaggaaaaaaagt  
aactgcaggcagcctcagaagataaaaacctgaaagctccgaacacgcatctaattcagcgaagaaacaccggacatcactttggaactct  
tcttctggtagaagaagttaccaatgggtcaattgaagaaatctagcaaacgaaagggccaactgatgttacggggccatgaagcatttag  
aagcgaagggggcacggatagaaaagtagatgaagagaaaaagaacaaattgaagaaagtatacctggcatcggttttctccaagca  
gagggcaaaaaattgcaggataacgagaagctttgaagaaaacatgaaacggaagaaagaaagaaagaaagcttctgattgctggaa  
agaaagacataagagtgtaacagggattggccttcgacagaagaagcgcaagaaatctcagaacgtcgagatagtaaaaaatcta  
ctaagaaatctggtaaaaagtctgataagaagcaagaagccttcaaaaaaaataaagtcaatagataatatagggtatctgg  
gtgattataggattggattatggtttttaatgagatgcatctcaaaagctattgaatagtatacgcaaaaccatttcatgagcgggattataca  
gtattcattaaattgctctgtagactaattgctgaaaaaagtgaacaccgattcgtaatacagcgaaaaaataataaatcgaatgtac  
aatcgatacacaaaattgaacgtcaacttattcaatacttctgctgatggatgtgacgacctattagatagtgagcggagttctgacgacg  
ttgttctgtgctgggggtttcaacagaattatcgtttggtagtatctgaaattgctcgggtcagtcagtgtaactgtgggtgcttgatg  
atgggaattcggggagatagctgggtattgtagaaggggacccttcgcttctcttttctgatttctctgctgatttccgaaccgtagacgttct  
tctagacaccttcttctgatttctggttctttgtagaggtttctcttcaatgacttttgggtctcttttgggtctcttctgctgacgct  
tttcttctgtagaagcgtcttcttagatcctgagatgaagattgtctagaagctcgctcatgcatggataggtctgagaggctgttcatcatt  
agaatcttctctgtttctgtagcttttccatttgaactggctgatcattcatagaaggctgaggagtagcaggagttgattagcggcattgg  
aaggagtgctggataacttcttttcttttcttagatcgctcaacttccactgtcgcctcggccaccaatggtccactgaaaacaaaa  
aacgtcttactggcagcggcatttctcaatgtataactctgtgtcatcaatgaatgggtcatgtcgatcatagtagtactcatctgctatcttctt  
tcttctgcttttgggtggagctgctgcacctctgcatgacacctgttcttctcatttctccctccgactccgctgaatccgaaagttcatttttt  
ttacattactattaatggaaggccatagattttcacttctcagcgaataatgtggcgttttcttctttaaaggaatttctaacaca  
acacgctggatcatgaaacggaagcatgttcttctgttgaaaaaataaaaaatagtaataatattacatctgactattagaaggaaactg  
aatagagaaaactctgagaaagaaaagttctagttgagttaaaggtattgcaaaaaagcagtagatagccaataaattttgttcagtgga  
cacaatgaaatctcaagaaacccttgttgagcaatgttgtttcacgtatgaaatcacagctctaccttgaggtgcacaactttaagta  
ccgaaaaactatccaatattatagcttttctggactgaacgcatcaagcttattacaggtttgtgaattcaaaactcatagagggtgtagctgtg  
caacttgaatatttctgatccgtttggaggtgacaattgtagcttatagaacgatagcagtcctcgaataattcgtatttccaaatcgcaatcc  
tataaacattactaaaagtaaaataaggtgatttagcacgctacaataaaacagaatggttgtttcctaaagtagagatagcttaag  
gatgaatagaaaataaagctgtgacagtctagaaaattatgctttgctaaagataaacgatggacatagaattatagattttactggaag  
cttagaatagcagagtggtattaaggcacacatgaattaaaaacagcaagtgctttttttacatagaaggtagcagttatggaaaatta  
gctgattgacatgttcatgaaacttattcaaatgaagctgaataaaaaacaaaaaggttcttctggtaggctcgaactcacgacctcccctt  
tcaacatagagaggcagctaccaccaactgagctacagaagcttgttggtttcttctgattcaggaatagagatagttttgatcttctta  
gcataaaatatttttcttacaagatcatagaaaaagaaactttactacgatcgacgaaaaactctggaagattgctttgccttattgtatc  
ttataagcatttgataggtttgaatattctgtagaaagtagatgagatcacgagaataaacggaactgtatgaatacaagcttaaaacaa  
ggaattgaaatggaatggctgccaggtgtgattttcattgaattttggttactacacaccgcttgacgcaaatggttagctcaccagcaag  
atcttacaagttggaggttctgttggagacagtcagctatctatagttttgttaaccaagttcctttatgaaatgaactacataaattcgctg  
atattgaggtgaactacaaaataatattctatagcattatagtttcttaattctgatgataaaaaccttctcggacaacagtaaaaca  
atatcgtatacagactatacagatgatagaacaatatgaaaaaaagactgatttttccggtgactctgtattactttttaggattgaact  
acatgtggattgaaatagattgcaagccagccaactggttgatcagcaacctgaaactgatttcttctcctatacacaattagtaa  
ggtgaaacagaaatgattaagaagaaatagagctccgtgtttaaaggaacggttagcaatgaatttcatccttctctgcaagtgcattatagc  
aaaagaggagggtcaacgattttttcatgggtttcaaaatggaaaggaccgcttgagtgattttgttccaaatgctgtctactcatcccagcag

atthcatcgttgatgtaccgcaaaagtatccaaccctcaaaacgaattggtacttcaaacaatcgatattacaacgtttactagacacaagat  
acttgatgaccaatataactcaatthtagtataatgataaataatgcttttaaatagtaacaatagtaataacaagcataataatataatthta  
catattctgcatggtatthtatgtaagcatatatacaagcatatgctgttataagcctaagctgcttaccgagaataagctcatgtgaatttaccta  
gtgcaaacacgggttggtgaattgaaggtcatagacataaagattgtcaataagaagaattaaataagttattcacacattcaatgatacatg  
gatagacgaaggtggaggccttcggcgccggtagttatcttactattgcttttcattttttgctccggtagctgcttacccttctcgaatggggatt  
caacagagaaaagtcttcaagccgaaaggaattggtattcgaagattcagaactcaacgtttcttgacgtcctgaaatagtcgacaatctaca  
acatttccaaagaggtgctgctgaaaagaacgcaatatacaagcttccgctggctcctggatagccattcaaaccatacatctgctgata  
ggaaattggaaaaagtctctttgattctttggcaaggttctccaatgtaacatggcatcgaacattacaaaatcgtaaactccgaaaa  
ggagggttctcagctaatgtatacgaatcccgcacagaactcaatgacttccggtttgatgaatggagaattccaatggcacttactat  
atcagttagttatthtaggcatctgattgataaggctcatgattgtgggagctaccgaggttccgccaatccaggtgtagatggattcca  
tggctttccatgagccagccgataagctgatttccggttgatggccaagagtatttgaagtttaaaaaaagcttccggaagaattgacg  
ataggattgatacaatctcacggggaggttggctcctttgtatacggggaggaaagtgttctgctgggcttactttacggattcaataagaa  
cactggactgagcagaaaaactctgccgctatagaagatgaattaccatccacaaggagtatctataaaaaagatgcccgacgtctattgt  
ctggcttaacttcccagactgcaacgtcgcctttacttttcaattacaagggccccgcaattttgctttgatgctggtttagttcgatttgc  
tctttctatatcatcataatctttatcagatcttttgggttgcgacagatgctttaaattcaccttcttattgttcaacgcttcttaccatt  
gctattcaggcttctcgcgcttctatgcaatthtttctaaagataaatgttattcgaaggggctatttactttgttccgctgcttttct  
tcaactaattccatcggtaatgtttaccatgctggtatthggctttgattttgctgttcaaaattcaattctctccaccgcccgttccccactc  
cgaacaacaatgaatccacgattgaaggtgaaggtgaacatggtaatgccaacacaaccaacgtggagaatgtcaaccagaagcaggtatg  
actcagcatgaacgtgatcagcagagattggtcagctgtttgcttctgattttttgtaatactgttctgtattgtcttctgattccgcttttgg  
cctgtcacttatcgattctatttctattctttgttacctgttattcttttgggttccccaaattattcagaatgtcaagcaaggtacatcgca  
agttttctggatataatattcgggtaagcatatccgctatgatatgctacgtttataattcttattctgaaaccactttgaaattctctcca  
aatatacgttggctttaggtttggtatgtctccaggtttttttttttgctgcaggatacttgggaccaggttttttctaccaaagag  
ggtgaagatttctttttatacttttcaacttattgcttttagtttcttctagttcagcttacgattatcccgattattcaagcaggagatt  
tagaagctttaatgcatgatgccaacgtatgccctattgtatgcaacaatagaactgtttctagtggtccttaaacccagcttcaaggatt  
gttagaaggaactacatgcttacacatgtcatctatctgatcatagggcagctgttacaatggatggaaaccagaagtatatgcccgtttgtc  
gatgcatcttctcctgtataaattattctgtcatgaacttctactaaaaaaatttatcaccaaatactcccgttaatttcatgagagaaaaa  
aataaagaaaagaaaagaaaagaaaagacctgacttctgactatggttaattataatgaatgatattcatgatgcaattcaatcgatgttctt  
atatcatgtaaatataacttattgtatgtcaaacggaagatgacaactaactgcttccagaagaaagccatgttgatagaatcgtctccatc  
aactcctaataattgaagctttcattggtgaaaccaagattttcaaaagtcgcatattcaaccctccgataaatgggaagcagaccgtccctta  
gaagacagaagcaggttaaagcattcaagcgtaaacgatcaaaccttccatcgcagatataaggggcaactctgtaataagtatgtcatt  
cgtacgatctatactattaggagaaagaaaatggatgagtgagattcggaaagggaaaagaaagagcattgtagacctcatcaggatc  
cgttcaaaaagttagtaaatthttcatcttaatgtaaccatacttataagatactttgaggctaagacagctaaataaaggggaactctthta  
atggagtcggtaatattgtaataataggatgaatcttttttcatacagaccaagcacaataaaacagtggttattcaattgaacctcatgagg  
ttctggtgatgcttggattaaaaggatcgggtgataatagggatcccattaggtggtcagagcaactcaattcacttctcgggcatcttgg  
tcaatgctataatgaaacactgtcatacaataaatcatatgtttcatagatagagctttgattagaaaagcaagcatctatatcgataaagaa  
tcggtgtattcatatgactggtcagttggtccaggaaagactcgtggttattgaaagcgtggaggcttctccaattgacggtgttaggaagaa  
ataggattcctaactcctatttctcatcactgtaagttgaagaaggcttctcagattgtatcctgtcgttaagatgtttatccatcattaa  
atgcagacacggaggctccacggttggtatacttggggttgacatcattacccttctaaaggattcattgttctgtaaggcaccaaaaatt  
aagttgcattaacatagtcgtaaatccggtcccattttctgaattagtgattcaacaacgcttcttgagacaatggcttctcggaaaataatg  
gaagaagataatccgtcagtgagccaaaggcaactgttgaactcaactatgatcttctgtaaaaatgacgacggaaggaatcagttt  
gattgcaagtcatagcaactggtcttttggattttcaatgagtcagtaacagcttgccaaaaaccagatccttctgaaatattatatcaactt  
tctaataaggataagtgattggttattcttcttagatctcctactacatgactttgagtgagcttccaatccgttctaaaagtcccgacca  
gagcgtcgcacccggatgaatttctactattctgaagtttaattcatgacaaaatggcatatataagaagcagtttcccaattcattaggacca  
caactaccatccaataggacattgtgaaacagttcttttacttttgcgagaattcgcgataaattatcttcatcatcggttaattatcaggct  
catattcactttcgataaggaatcattgaaagattttctgacgtacgagattgactggtagaagaacgagaataacagaagacttttggggg  
tatgggaaggggagctggtttggagagtttcatgagcgcaaccaatcctcaattttgaaatacaatctgaggatgcacaagaatccagtgac  
tttttaggtgagttatcatagtcataacgtgttactcaaattatagtcattattaactaattcttggagttgatgtgaaagcacgtttccaaa  
aaggaagaggagtgaaacccaaagattccgaagcaaacagtgtagtttccatagtggtctggattattcaggctttggtggttaataatgg

tagagtctatgtctttcaagcactggaaaagatatctgagtaagaaggcaatgtcagcaaagcagaaccgtttgaatctgatctctcgaaaa  
ggtaatttgtatcactgacgtgcacaggggataaaaattcggttgattatcaggaccaggccaaagagggtcttttaatttagttactttccag  
attcaaggtagcttttcagaaacttagcttcatcttcatcatccgtatgctttcgtttcgagaagacgtaaaaaagggatgataagtacatt  
tgtgaagaatttgatgctgaactgtttgcgaaaatgaaaaggggtgcacgggttcagtttggttgaagatggtctgcccaatgccagtcacca  
ttcttagtactattcattaaagaatcttcatcgtatgatagatccttcgctatcagcaagcaccgaggtctccacattgagttagactgtatgttct  
tggattttatgccctagtagctgaaacttttagttttacaagaaaacaaggatcattgtgtgtggagaaaatagattccttctcatcagccaaag  
gagaatctttatccaagaagcgtctcatgtatgtttgtttgtgcaacgacttcgctccggcgaggctacgagcaccaagagaatgagagcgag  
ttagttcttttcattggggatgtagatgtctgtggcattgtttatggcgcaaacacgctgcgcttctcagacgaggacacatgctgagaatct  
gaattggtagcttttgcgaattgcagacaaatagcctacaatttcgataaggataaaaatattaccgataagtagtactactaaaactgtttgaaa  
atatcctaagagatggaaacaactgagttgagaggaatcctcaagattggaagaaggatattgttccaagacattcagcatagggaaatc  
gacgatagaaaatgtgcgtagtaactaaagcttattgaaatattcttttaaatatttcaaaagaaatatttcgagaagtgagagtatctcatgct  
aaacaatgtttccatccaatacgataaaaatcagtttgattagaatagtttccagattactttattttgaaaatataaaagctaccaagtcgtg  
aatgattccgtagggtgcatgtttaccatccttgattcagaaagaatcattagctaaaaagtcctttagaagcctccgtagggtgatcatgtat  
aacaattctttttctcatctttactatgtacttttattaccactatgctcaattatgctaccaaacgctgtttacatgagttgattgtttaca  
gaattggtgtcaagggtccctgggagtttaagcattacaacttctctaaatatacgcaaaaaagtaattgatatgcttttatggccatagtta  
gcaattttaaacacaaaatctgattattctaggatcatattatagagtaaatagcagagtcgtaaatcagccagaaaaccatcatgtattta  
gagcttgattccttgctttaaaaagctgaaaaaatcaaggaatgattgcgtcgaagaagcagctagtcgacgaataaaggcatgtttacgga  
cacatacctttgagggatagagtcacatcaaatatcatatagttatagttctataaaaaggtgaaattgagcctccacctctgataaagctcat  
actgtgaactttacaaaaacataaaacgccatccgcccagctgtccattcgaatgaacgggtgcacacaaaactcggtagagagtatgaag  
aaaggattcagcttctgaaatattatggattcaaaagcttgctacccttcgctctacgtttctatgaatgaacgaaactcctggaaccataaa  
caataaaaactgtcatggatgattcaataaagacccttctgtcaatttcttcgatattactctcctcttttattttatcttcttacgaaacg  
ctcaaatgatcgattcatcggtttttgctttgttactaaatagtgactctgctaaagctcactataagtatggggtagaagtgcgaaatgtaa  
ctaaccatgagcagaaccgtaaaagtgaataaataggaatggaagaatttattccgtttgacgaaattgtgcaacagtatgatccaaataat  
gcaggaagaagtaagatcagcctgactcaaatctaggttctcatgtgtaggtttgattcgtagtttcttagaaatcgtcgatgatattgaggccc  
tacgcaaaccttctcctatctttattagatgctgagcaaaaggcagctcgcagaggattcattaaggacaatgaaggaattgtggttcgacaat  
cgagatataaaactgtttatgaattaacaggccaagagccagatcgaattcctataagcaaaacgattcttagaaatagggcaaggagccgg  
tctcatgtgggtccaatccgtataccaagtactcagagagaaagcattcaaggagaatgattttagcttcagacaccgcaaaaggcagcccc  
attgggtcagtcgactccttttacagaaatcacaacgcaaaaggatgttaaaaataatcttcggggcgagacgaaacgggaaatcaagag  
gagacactagctcaactatgaacgagtcgaattccaatcagatcaattcgggctaaggaaattgaaaatcaggattaaaagaacaaaacg  
aaaagtttctgaagattgacagctcagaggaagcctgtaaatcgtgctacacgcaagcgaactgggaaaaaaagtttctgagaccct  
ccgagagtcaaaagatttttcaacaattagagagcatacatcaggaatagaggtgcaaacagcccacatcgtaggtcagcaaatcatt  
gaggcagtcgagaatgaacgaatgacagtatgtttataattaaccacaactatttcatttcaacctactaggaatccgatcatctgcaaaaga  
cgttgactcaaaagcgaacctgtttattagaaggaatcaacaactgaaatcaaaataaagatattaagagaagaataagtaaatcgaattcg  
gtctcgaagacttctctaatctttctgtcgcgctttctatgagccggctgttttcttctcgtttaccatctttaccctgtctcaaaaaacac  
aagcggatcctcaactcagcgcgagctttccctttggcttccgaactgagagcaaaaaattatgctacaaaagtttaataagaattaaggaaa  
agcctttacaggtttctgaagtgtggagtaatgtcgaaaacgattgcaaaacaaaattatccgtcatcgctttttacggcttaccctcatttctgt  
tgatgatagttcttcatgctgtatattttcttcttcgagttggtactattcaacaatggcctttgtctattggcttctcgtttgctcctgacaa  
tcgttggctcccacataaaaaccgtttcttctgtatatttatgattttctttcccttgattccgctaaactttttgtaagcagttgaagctc  
ttcggaatcaagttcatatattgattttgctttgtataatagtacattttatattcttaaatatggttttaagaaaattttggtactcttatgtc  
tttctatgaatctgaactgctaaatgcaaggtgtaactagacttatttagactactcgaattctagaattgatccttgatgaaaaggcattccctc  
ctcatgatgaacatctttttattatgtcgaagtgtctaaaagtaactgacatatcaaaagttaaacatgaaacagaaggtcatgaaattgttt  
acttatgagttagtaggtcacaattgggcgtataccgcaatgcaccaatattctaaatattcaacctattcaacatgcacgtaaacaga  
accaaaattatgtagttttcagcgcgtaaaacaaaaacgctttgttgttgaattttattttaataagtcgctataacataattttaggtcgttt  
agcttaaaatattttggacaaggtgaaacagattatcgaagttaaaatcatgactgagagaggcggattgtttcgaacgttataggagatgt  
cgtagaacgacaaaaaactcagggcctaatgaatgaaagtcgaaacagcgtcatcctgggtgttttctagattcctaaaagttgctctaaacg  
ccatacgaattctatgagcacttttaagagagacagacgcaaaataaaaaagcaagtccaaaagaagaagaagagggtactctgacgctc  
aagggtgatgatgaaaaccgtgttcgattggatcgaatggacgaaatggaaatttagaagcacagagtgaagtagatctacgatccgaga  
agatttattagacatgttataaataggtataaaaagaaggtggagaaggaagcttttcaatctagctccttaacctaaccgggtcaaaagta





aaggatattccccaagtaccatgcaaagaaagtactttattgagatatggaacgttgagatcagcaatggccttatcatgcccacataagccaa  
ggcaccctgggtgtttgattggaaaggcttcaattgagtgtagcaagctctgtctcataacggagaattcttttccgcttctctcgcaagctg  
ctttccatgacctcaagtctatgcttcaaagcagtagcctttccggacctgtaagattagcagctaaccagtcaccctgctgatgagcacttga  
gcagtagcaggcaatcctgagaaagcacagctccaatggcatacacatcaggcatgcccctaacacggaagaattcatcaatgatcaatcctc  
acgagcaccactttgttcgggaatggaagacattaattgacgagtagcagtcacgggagcttataaccagcagcccagacccaaagtccataagga  
atgttctcaatggcttagaacctctgcgttgggttttgaatgatcaattcctttcgttcacatccttaacaagagcttctgtcataatattgatgc  
gaatgtcttggaaaagggttgcgtgtactgaaactaattgcttggaaaacataggcaagaccttgggagcagcttcaataagtgatgatacgaactt  
ccttgtaaagttcaggaaacattctacggacatcacctgcaatgtaatcgcgcatcttcagcagcaaattccataaccagtgaggaccaccagcact  
acagtaaagtgcaaaagacgtgaacgctcctcagggtgtagggttttgttaaaacgcaactgctccaaggtatctgaaaccttgtgaaaatctttt  
tggcatcttcagcctcctttaaagaacagccatgttcttcacacctttgagtccaaagtattgattagtgccaccgatagcaattaccatctgca  
taaggaagttcagttccacgctcttattggcagtagtagtaccacgaataacaagtttttagccttagaatcaatagatgagcattcggttgat  
gtatcgagtgaggagaaagttgtcctgtaaagagataactaacggttcggttaatactggcaagcgttaaggtaccgaccgtacaagaggggaag  
catgggagtgaaaaggaaatggctcgaggactaacgacaactacattgtacagagaggtatctatgttcttataatggaattgcacccac  
cggatcctaaaacgacaagagctcttttggagcgcctgaagcaacaatagcattggaagaagggactacaccacgaagggttgcacaaaag  
caacaccgctcaataaagaagacttgaggccacctcattacttcaacaagcgggatcccatactggatcttgcagggaggcttctcgttgg  
cgcggatcgagctgaagattggaatgagcggcggagcaagacagcattgactgccatcctgaccttttcgtaatttaagcgcggttggagtc  
gtaattcaaagaataagccatttttttctctacaaaatacagcgtctcagggaaaagaagtgaggatataagagcaaaaaaatgacagtat  
caaataacttctgaacgataatattaatccagtttcaaccaagcttctgtggttaaacaaggctcgttgggttttttagaaaacttgaagaaa  
cttgagcatacaacggtttaggctgctattttttcaatttctgtaacagcaagttgtaaagtctggttttctgtatccaaggtgagaggggtg  
tttggaaagactgcaagttccaagccttctcagcagataaacaattaaggtacggtaataatggtacacaacgtcactgctggttctcggt  
tgctattggaaaagcaaggtaccactaaactttggcattcataaagaaaatagcagaccgatttcatgatctggtaaagacacttaacgatag  
ggatgaggcttagtgattaatgaatcaaaggaaaagtgaaaaggcaagagaagatagttgaaggattgagtagcttcttaggaattgaagg  
aatagcgaatctgcagcaataaagaaaaatgggtcgtttgaaagcgtatggtgaaatgattatgattcctcaaaagacaagtcattatgaa  
gcgagcaaaagctcagactcctaataagaaatcttcttatgctttatctggttttctatagagtgatcaactttcgaaaacaataaccctt  
gttgtgtgcttgggttctgtgcttaccattgttgaacggaaaaggttcagtaaagttgggttcgttcaaatataaactgatcttctgttttg  
atctgtgaaagcagcttattatgtgtgtagaagctcaattacgataggttagtgagggtttatttatcatgcagcagcagcagcttccagccc  
taagaatccctatacatttcaaacagaatccatctaatcatcgtataaaagtaaaagtaaaagcagaatatcaaaaaagtaaaaaagat  
cgacgattcactgatgtttcaaacaggagaaacagcgataaaatgtaataagcattttctgttttagcttcttattttacatcttctctcttct  
tcttcttttgcgaataggttaggtcttattgtaagcattcatgaacagggtcttcttctgagtgatcttcaacatgctggtgggactgctta  
gcacaaaaagaattctcatcaggaattgtcccagaagttcaacgagaatcaattttttctgcatagatacgtgtaagccaagtaattat  
ggaactcatctctgttgggttctcggtcagcattctaaactcgtgaagccaagggtcctccagtgacaagttatcgcaacttgaagg  
tactttaaggaaataccggcgtcaaaaagtgccagtgtagctcattgattgcagccgcaagcgtatcctgaggttcttcaacaacctgtatcg  
acacctgaatcaatgtcctaggataagtggtcaaatagatggcatcttcaaaagactggatattctgttggaaagcattctctcagagtttcaga  
ggctccattcatgggtgaaacaaaacctccacagaagccttattagtttctgctgcggaatttaattcaattggaccattaacattacaataa  
cgcgagttgaccttgaacgattagctaaaacaggaactttgttcaattcagttgcaaccgcaagcgtatcggttgttctggttttaccgacat  
acctgtttcattcactgatccatctgactgttataaaacccaattttattcatgatttgattgaattgttctcaacaaatgttggaaatctgcaa  
atttgttcaagtagcaaaaacaaagccttcagacaaatagtgctacacgattacctgctataaagtaacaaaagcactgggttccaaagaat  
cggaaatgaagattttataacagtttcttttattgtgtgaaataatataaaaaattgctctataattgcatgaaggaaccattgcttatttctaca  
tagaaaatagatcgatttctatcttctgtcggcattgattttcaggtacaggaaagtaagtcaatcggatgctaacggatgaaatagaaaag  
aaaatagaaagatcactgctcaatgttgaacaaatcgctttacgcaattcagcaagtcgactgagacaacgtgaaaaagcaaaagacctctt  
ctaccctgcaaaattgcatggttaattcgattcagatgcaattttagagtggtcaccactctcagtgattttcttctgatattttagaggattgtaaag  
gtttgatccctccggcgtaggataaattagatctactggaacgtcagcagataaatgacttagcagcagaaatcgtaggctgcatcaataaagt  
tgataaaccttgaactaggtctttgcttcaatggaaagttgggggatcggaaataataaattgctgaaagcagatttccaacgatataat  
cagctgcaacttttggctccacaaagtcttgaagtgaaacaggctgcatctcactgactttgggaacgagaatggtccttcaaaaacttc  
caactgtacctgtaggttgatctccacgaatatttccgatacttcaaacattgttgcaattgcttttactaagggatcttgagctgggtgaag  
atatatacttctgttccgatttaagacgtcgaataatcgttgggactatctagacagattacgttcaacttctgtaagcagatgaatacaagga  
agaaagctctcccttgaattccattttgtaaaggtcatttggagcaggttgaagtgatgaaataacaactccgacttttgaagcattcaaa  
caatcttgaagtataagagcaccgctacatctgctacttgaagttcatcaaaagcacaacactgtacatttcttgaagctgagcactaagata

atcaatcacgtcgaagccgtaacccttcacttgtttcaaatgggtgtcagattgatggatgtgtagcataaaggcatgaaagtgaatgcgctttga  
gcgagtaatattcgaaggtaagtattataaaataagccatcaatgcagttttccacatccgacgtcgccatacagataaatgcctttaggatt  
tggggagcgaagggtcctgaagatgccataaacgggaagcatatttgcaagttagagcgaactggataagacagaagcttttctcacc  
tcgggaatgcaaatggaagcttcttgggtacaggaggttgcgtgtacgcttgaattcttggtaaatccattgacggcaagatggcctttct  
tggatggatcaggcttccatttcttctttactttaagctcataggcttctaaagggttttgaagattttgacgaacgaaagtatgttgcgc  
ggcagcgacctggacatgccacgtgaattcaataaagatgaaggctggataatgaacattttaagaaaaaaatcaaatagtttaaaaact  
gagagaccaagtcgttcaatcggctaagacagcctgtttccattacgttttaactttccgataaaaaatgagagcttgcgtttttcataatcag  
gaggacttcaattaaagtaaagaaggacatgaagataccactgcaaatagttccgtttttgagaattcctatagaaaggaaaaactcg  
tatatggcaggttgacgtacttgggtcataacattatacaaaaagttaaactttaaaaatcagcttaattgttgttttggaaaagataattcaattg  
aattccctataacaatgcatcgatttctagaaccgaaagtggaaaaatgttgcacctttcacagagcttgaaggggaaaaagaaaggaaggt  
cgtatcagagcaaacgaagctgtctcaatgttgttagagcaaaaagaacagatcattagtttatttattactgaggcaaatgagacc  
ctcattaaatgctgtaataaacaacaatacatgagaaccagttattagaattgtagaatttactgtatatttctcaatcattgcattcgtc  
tcttatggttcttccgaccttgccttctttaaactgggaaaatgtaggacctgaagagtagaatctgaacgttgcaaaaaaaaaat  
aataattaactaaactaaagcctaaagaatagctagccaatttacctggcagcttcaatttaacctaagagttccagatgcaaggaaacaca  
ggaaacgccagaatcaagaaagaaggtatggtacttctctgataacaaaaacatgaatgaaaacaagaaacataagtgaagaaca  
acctcaatttactcgagatttctcaaatagcattgattgctcctccatcttttgttactctatagggatgactccaggtcatttttggcta  
ttaggtcgttagcgttctgtaattaatgttataaaggatacttcagaagactttgacctttaccaactggttacaagcgattagaactagaat  
atgggtgtgaaaagcaagttatttagtaagctgagacagcatcattgagagcgtttgagtcctcctgaggtatcgtatgga  
ctacgaaaaagggccatgaccatttttggaaacataatgatagattgggtttgaatacctgctaacatacaattttattagcctgggtatggc  
aaaacttctaaagcctggatcgtaagtagatataattatcgtaaaacaagtgaaacaggtagagatgctgctgattgaacgaaacac  
gagaacttggtaatgtttcgttattccattgcttattgtacttattacactccattggcttctattttagatgtaactcgtacatttagatca  
ccatgactacaccgtaagtgataaccttataagcatataaaagcctgctaattttgggaattggcgtgcggttaagttctaattggagg  
gtttttattggcatgtttacgagactattgctcactataatttccataggtactctgcaaacggtaaaaagttgactctccgttgacctgggt  
accttttcaacttgaatattggcgttggtaattgatccgtaagttgttacgataatgtctataaaattgcacagaccaagttcttttttcaact  
ttactaattaggtggatgggacgaaggttctcaaatgatttggcgaaaaagccaaactcaccattactcctgactttgggtatgggttcgta  
actgtcacctcttactttaagagcttcttctgttactaactatctatagccctcgtggattccctgggttattcccgcaatagcactctcgtctg  
taagtaaacatcggtttattttgtctatagtttcttacttctaatgattttctagcgatgttgagctttggccatcaataactgaaggcttgatc  
atctagcaaatagacgctagatcaagttttttatctatgatcttttagtatacgaactctattttatataagattggttgaatcttgcatcaga  
tctttccatattactacaaagaaacaaaggtaatacttttagcttctgtagcacattgagatagagaaatcatgatatcgacattcaaaaatttct  
aaatttataaaaaagaaagaagatgcatattaatgaatcctaaagtcaagatcttggagagttctcaaaactattatgcttcaagacaa  
ccaacctctgatatacagctcgtcagtaggctcagcaaatatggtggagcgaatccggcattatattaaggtattattaaattcaaaaacta  
aaaaattaattggttgaacaattaagagtgaacaaaagtttaacagcaatctgagtttaatgaaaaactccttacccttcaagaagtgcattt  
tggactcaattctagtcgggacctgcaatcctctttatgacaaaccaagtatattaccatcctcatcaaatcaatgtttagtaagcaggcttgg  
taggcaaacagggaatagttgatatagcagctgctaaaggatagatgaaaccagcacctgcacttaagcgcatatcacggatgggtacggtaaa  
attattgggaacgcccttaagttcgggatcggctgacaaactgtattgttttggcgtatgagataggttaagctttatcttctcagtgaaac  
gttcaattttcacgtgacagaggactcaattctattccatcagccccatacttcttagcaattttcaattttcttcaattggcaagtttaa  
gtcgtacaaaaatcgaatcagcctttcattctcacaggcatgaattaaggcacgagcaacgttcagagcaccatttctcctcagcccagtg  
atgatataacggcgtcagtagctccagcacaagagcctttcagcaatggcaaaaatctcactgtcagaatcggatgcaaaactgttgatcg  
cgaccacaacaggaaggccatattacgagaattgctaataatgttagcaggttagaacaacctttcgtacaagttcaacgtcttcattctgta  
cacttcaggaataggcttccaggaccaacaggaggtccaccaccgtgaagctttagggctgtacagttgcaacaataacaacagcatcgggtt  
tatgaccagaagtacggcacttaattgttataaattttccatgccaatatcagaggcaaatcctgcctcagtgaccacatagccagcatccttagt  
ttcatctcatctggctctgactgtaacttttagagcaatcttatccgcaatgatagaggaagcgaataactaatgttgcaaaaggaccggcg  
tgaacaagagctggtgtaacctcaaggggttgcattaaggttggcttaatggcatcctttagcaataaccacaagggcaccaccaacacctaatac  
atcagctgaacaggatcacctgtttattactagcaacaacattttacctaaccgttcgcgcatatccttaagtcagtagcaaaagccaatacc  
gacatacactcactagcaacggataagtaagccagtttggcgagtaaatcccttctcagtggaattttaccaatagtaattttcgaaggaat  
ctatcattagatccaaggtacgggtccaagaaatagttgaaggatcaatgtctaactagcaaatcgggactttctcctgctcaattctcag  
ggtttcttactgatccaagttttcaagacgacggaacataacaggtgcaaatcggttttgttgcctttacagtggttaacgtttgaacaaa  
cgagcatcgcttgtgattttcgtgaaagattcgagatcaatagcagcagcaagcaaatagtgccgcagtaatggcatgtatcaccggctc



agatgaagattaaagtctccataggaagaactgagaataaccaccgccagcagcaccacccttgatgccaaaagtggggccttgagaaggt  
tgacgaacgaagcaatagcaagcttatccaaattggaaagagcctggacgaggccagcagtgagggtactttaccctcacaaaagggtga  
ggagtataccggtgacaacaacataatgaccgtcacgacgatggctcaaacgtttcaataagtccaaactacttttagctttataagcaccata  
gcattctaattcattttggaaataccaatttcggaagccaagtccaatgaatttaggagtttgagatcgagcaatatcgatcactgggaac  
aggagttgaatttcaaaggcaaaagagagggcatacgtttcgagccaattctttacaacggatggccgaatccacaacattctgcatcaaca  
tggcaacggtcatgggaccacagatccaggaccgggtaatggcgtaacgacttctttagcattttcaaaatcaatatcaccagtcagcga  
taaccagacttctggaggaatcagggatagtttaattccaacatcaattgcaacagcgccttcttgaaccaatcagctctcaaaaatgagca  
gaaccaacagccgaaacgacaatatcagcagttttcaaatctctggaatagcctttgtcttgaatgacacatagtaacggtagcattggccttt  
tccaaaagcaagctcatgggcaaccaacaatgttactacgaccaatgacaacggcatgctttccagcgcaggagatggtgtagtgtttagaat  
cttcatgacaccttgggtgtacaagctcaaaagagaggttcgctaccgcttggccagtttaccagattcccttcacagaaacatcaacgtct  
ttctgacactgacagactctgtgatgcgactcgtccaaatgagaaggtagggttaattggacgatgattccatggacagaagggtcgctggt  
aatcgttttaaagccaataacaattcgtattcagagatatgctgaggataattgatattgtcacagttatgccagttatagaaaacgttagac  
gaattagtcaatttctcattaacatagcacagctctgaattgcaaaagaaagcattagcaataatcagcaaaaatgtccaaggcgcgtc  
aatcaccagttttaaagctcgctttctaccacaactcaaaatcccactgaaggaaactactcacctctgagcagcagctgttttctcgaac  
atatacgtggaatcctcacgtgcgctacttgaacgatcttaagacaggttgaacgtagggcatgtttttggatggaagaaacgcttcgctg  
taaaatttccctggttggactcaattgttaaagcaaggtcaatcaatagaagcatttcttaccgctaatgcaacgccccttagaagttga  
gcatgaaagtaaagttagggaaaaggcaactggctgcaagaacaagaccatcctaacaatctaccccaaatctgagatcatgattttat  
attgtatacaggaattgtataatgtaattgaacaaaataaaactacatttgtataattgtcccttagactcttcttcaactttcagcaggtaga  
atcccttgctcatgcagatccttagatcggttggagacgcttaatttgggcaaacctggtaatagacaactaaaaaatttctcggtgaaaaa  
aatagaaaaatgattggacgtcatgttcagctgatagaacaaaagcgcctcttgattggctgcacaaaaattaaatagaaaaggacccta  
ctttcagagtcattgtgactgcttctaggaatgtaaagctatataatggaggactcctggcgttacaacttcaactgctactttgtaattca  
taaagtatacaaatgggcaaggaaaaggacatattaacattgttattcggtcacgtcagttctggttaagtctaccactaccggtcacttgatt  
acaagtggtggtatcgacaagcgtaccattgaaaagttcgagaaggaagccaccgaattgggtaagggttccctcaagtacgctgggtttg  
gacaagctcaaggctgaacgtggaatcaccatcgacattgcctctggaagtgcgaactcctaagtaactatgttaccgttattgatgctc  
ccggtcacgtgactcatcaagaacatgattactggacttctcaagctgactgcgccattctcattattggtggtgactggtgaattcgaagct  
ggtatctcaaggacggtcaaacctgtagcacgcttctgctgctacacttgggtgcaagcaactcattgttgcctcaacaagatggactccg  
tcaactactcaagctcgtttgaggaaattatcaaggagactccaactcgtcaagaaggttggttcaacccaagaccgttcccttctgctccc  
gtctctggttccaagtgataacatgattgagcctaccaccaacatgacctggtaccaaggctggcaaaaggagactaaggctggtgctgca  
gggtaagactctttggaagccattgacccatcgagccccctgcagctcccgtcgagaagccccctccttctccttcaagatgtctacaagatc  
ggtggtattggcacagctcccgtcgctgctgcaaacccgctactatcaagcccgtatgattgtcacctcgtccttctggtgctcaccactgagg  
ttaagctcgtgaaatgcaccacgaatccttgaagctggtctccccggtgacaacgttgggttcaacgtcaagaacgttccgtcaaggacatcc  
gtcgtggaacgttctggtgactctaagaatgacccccctatgggctgtgtaactcaccgctcaagtcattcttaaccacccgggtcaaat  
nnnnnnnnnnnnnnnnnnnnnnnnnnnnnnnnnnnnnnnnnnnnnnnnnnnnnnnnnnnnnnnnnnnnnnnnnnnnnnnnnnnnnnnnnn  
nnnnnnnnnnnnnnnnnnnnntcgtcccctctggttccaaggtgataacatgattgagcctaccaccaacatgacctggtaccaag  
gctggcaaaaggagactaaggctggtgctgcaaggtaagactctttggaagccattgacccatcgagccccctgcagctcccgtcgagaa  
gccccctcgttcttcaagatgtctacaagatcggtggtattggcacagctcccgtcggtgctgcaaacgggtaactcaagcccggatg  
attgtcacctcgtccttctggtgctcaccactgaggttaagtcgctgaaatgcaccacgaatccttgaagctggtctccccggtgacaacgttgg  
ttcaacgtcaagaacgttccgtcaaggacatccgtcgtgtaacgttctggtgactctaagaatgacccccctatgggctggtgtaactcacc  
gctcaagtcattcttaaccacccgggtcaaatctctgctggttactctctggtttggactgccacacttctcattgcttccgcttcaatgagc  
tcattgagaagattgacctgtagcggtaagaagctgaagaatctccaagttcgtcaagtcgggtgatgctgcatgctcaaatggttctac  
taagcctatgtcgttgaagcttctactgactacgctccttggccgttccgctccgtgacatgctgcaaacctcgtcgtgctggtgctcaagg  
ccgtcgaagactgcccctggtcaagtaagttaccaaggctgccaaaaggctggtgtaagaagtaaatgtaactgattgtagattta  
ctttcctaaactggcatctgaaagcatgatattaaaaggactgggtagaagggttttctaggattacgtactcaaacctttagatttaga  
atataattcattgaatatctatgattcaggttaattgtactggtaattgaattcggttttaacagctcaagagattagtaattgtgtagaagaat  
gtagtctttgggtagtggaatagtgaaactgacctattgttctggttagttaagcttggagattgaaatgagtaagtaggatgtaagctt  
gtttggatcagctgataaggttgacgggatgggaagtttctcggaggaaatgagaaagttttagagagaactccaaggtcagaggatg  
aaaacgaaggtggagtgagttacgagcaagtcggatcaagttgtaagcgcacattggtgtacagagaagagaaaaagatttcggtgaa  
taaataagtaataaactagatggttagttatacgataagaaaaacaaattttataggtatggagggtgtgattattgcgagtagacatatctatg

tttctactaagggctgtgttcttccagtagagaataagagtaaccacgactcatgtcgaaggtcttttagaaaaagtactgaaatataggatttcc  
agtgtaaggtgaaaggaaaatctataaaagtaggtgattgtgaaattaaacgatttttagcttttgcgtcgcgtggaagaaactgggaaaat  
acgattcttggatagaacgataatttataaaaatgagtgattaccagagctagattaggaacaaaggctcagatgtttgaaaagtcttta  
actgaaaacttctcttgtaacaatgttggtttagttgggactctatgatgagttagaagatcgaattcaaagagttcaagatgaaggagaa  
atatggtttggcgaagagctgaagaacgaatgttcaatggatagaagattatgtttcgaacgaacaaaggacttcagcaggtggtgcttttcg  
ggttttagatttgggaacaggaaatggtcatttgattcttctgatcgtgaagaggctgacagcttacttctcagccttgcgttctgcttggcgtc  
actatagtgagaaggggtagaacttgcgaaaaaattagcagaagcacacggtttcaagaacgggttggatttgagcagatgacattatcaa  
agatttgcgattctgtgatggaacatgggatcttattttagataaaggaacctttgacgccatttctttagtacagagaccttgaatggaagtcctc  
tcaaccaggtgatgtggatcgtatcatgatgagatgctgtcacccaaagggtgttttaattaccagctgaattggacgctagaggaattgtcgg  
acgttctgtaaaaaaggattccgattcattctaccgtaccagtcctgttttgaattccaaggaaggaaaggtagctgactactgttgcgctt  
ttgagattgcaaatataaaggatgatagcaggtttgattattatacaaatagctatttattatggctctttgtttgtctctatcttagtttacta  
aaatagtcgctggcgttctgtataatagctattagggtaggggtccatccagcctcacaacggacacccaaaattcttggaaatggaagcattc  
aacagagaccgcaatatgtctgaattcaaaaagttgtcgttatagacgcaagggtgaaagaacataaaaaaaaggcatttattaacc  
tcattagacatcttcttggctgttggcctccgttgcgtaagcagcttttggcggaacaaaaggttagttgttgcgttgcgaggaattgaacatt  
tctgtagcttcttccgtaacaagctcaagtacctcgcctacttgcgcaagcttgcgcttacaacctactcgttggcttccacttccgtgctccc  
tctcgcattcttcaaaaaggctgttctgtgatgcttccccacaagagccccggtgcaagctgccttggaaacttgcagctgttggggtgtt  
ctcctcccttgataagcaaaaagcgtgttgcgtccctgctgccttctgtcttgccttaagcctggcgttaagtagtactgactgttggctgtct  
cctctgaggttgggtggaagtactctgacgttctccaagtggagaacgcagaaaggtgaaaagcgtgcttctatcaagcaagctcgcga  
agcaaaagaaggtagtctgccaagctgcttccaccattaatcaaaagcttccgaatacggctattaaagtgggttttgaagtttagatga  
aaagcttcttactaatttttcttttcttactttttatgtgtcaatcgtaaggtcgtagtgaaatgaatattgagacattctaagatga  
atggaatcaaattttttattatacatttttaaccaactgtccagttgggtttccattacctagtgtattgaaacaaccattaccgaactcga  
atgcagatatccaaacttccatgaatcaacaaaatcaaaagcaaaaataaaactataatggaaggaagcgttattaagaagagaatcgac  
gacaatgacctaatcaaaagcggccttctctctcataatcctcaaagctatccttaccggtatcaagtaatttccacatagctgttttc  
atcatcatgcaaaagcttcatcttcatcttactcttaccgcttccagcacttctcgttggtagcatcggcggttccagagcgtcgtccttcaaatctc  
ggatataatgggaaatcgatgaacgtcttcatatccaacttccgtctagctctcttctaattccacttccggctcctaactcgttgcggagttctca  
ggaaaacttgggtccagatctaaatcgctgagtcgaggtttctgttcttctggttaggtttattccgatcactgtatcgtacaagtcacatcatg  
ttcactggggttgaattgcttctcacgttaataaaaatgcacttcttggacaaacgagttcgaattcgttaagaacccaatcttagtaac  
tcttggagcgaattgatcgttgaatagggagatctcgatcaggatacagctttagtagcagcattaaactccagcacttctgcca  
gtcatacctccaggttccatttccacgagcaccgagcagcatgttcttggaaacgataatgctatacagtaaaaaagcctatccaactggctaaa  
accaggttcccttgaataaaaactagcaaaaagcttttatagacttttctttaaattgtgctcgtcacccacgaacaaactctcaccagct  
cttgtttccactagaaaatcgcaacaaactatcaacgtaagcgttccaacttttcttcaaaacttggtagcgcgcaatccacgatgggtgctggatt  
tcagtagacagctaacaatagaaaaggagaaacaaagatattggatgggatctcaactcctattttgacctcaaggagtttcaatggaattgtt  
tccgtcttatttttaaaggataaaatgggtttatagctataagattttgtgaccctcaacgaacgggtgtttgacttggagacaatgggtg  
gtacgaaaagcataacctcagaagcattctttaggtgaaaaaccgtttaaacaatattccgtgaacaaatcttgattttatcaaaag  
cagcttttttaagtgtgtttacttatttggaaaagtttgcgttggtaaaataggcacacatgggtctatgaaaatcgttgaatcttttaa  
aggtagtattgtttgtcatttcttaggtttttccctcactcagctcgttcaatagtagcagcatgtctggctcttccacaattgctcttag  
catgattggtattatggatccttcttcatgggctgtcatgcaagagaagattatcactcgaacctatgatggagaacgatttgcgtgctcagttt  
tgcttacctggctcagcttggacaacgggttgcggttgcgtggaattggttgcaggtgtacgaacaaaaggcttgaaccaagttc  
cttggctatttttagcattgcttcttctcaggtttgagctcctattttgggtatgccagtagtttcttattatcataccaacggctccttggaaa  
gtcgtgcaaaacttggcctttagctctccacgtgttattatacaaacgaagattccccctcataagtagcctaactcgtctttagtacctcgg  
gtcactgtatttagtacttcaaaagcgtggttcgaaaagtaagcatgcagaaaatgacagctattcggcttcttcttcttcaatttatt  
catggacgggattacaacaccactcaagcaaaagtttccgtaatacaaggttgcagcaccactatgatgatcgtgtcaatctgggatta  
cttgccaaatgattatactttatgccttttcaaatcagcaagaagcttggcattttacaagctccttccctgatacgtgacattgtatt  
gtttgcttactggatctgttggcaattgtttatattttacaccctagagaaatggtagtatcacattgggtgacaattacgttgacacggaagat  
ctttacaatgcttcttagtattgcttatttccaccattcgtttcttcttcaatgggtggcattgactgttttcttaggaatctctacagaagcctt  
ttgaaatcagcgtaaaacaactctaaagagagaaaagcaaaatagctatcttcttataattttataacatccttctttaaactataa  
ataaacttggattcatttctgctagatcagaacattaactgtgaagctccagtcgtaaaatataaagtagcatgcaagtagcagtagacttta  
ctagcaaatccgagcagcatcctcgtccaatgccatttcaatcttctgcaagagaccttgcacatcttttggctgtatgttctactgtaaaggta

attaaagagtcttctgaattccgatataactcaataatTTTTGGTAACAACTTTGcatctcatccataaggagatcctataatagccgtaataa  
ccaactccctttctgttccattactacatacctctgttactttactccaatcaactggataagaccaaagagctccctttctgcaggaatctttc  
aatcaatgtacgaagtctatgtgctttcagcttcatTTTCCAGCATAGGCCGTTcagcaccatgctgctcaactgctcatcgatcctctct  
tccaataacatcctttcaggaagaccaatTTCAGTTAGTGGTgatctgtgactTTTTAGGTTGaatctcatcttgaatccaccatgctctggca  
tttactggtaacagcagtagcaccatacgtggttgtccctttcatcgactggttcatgacgagcatgagcttctctctgtcgatcagctgcat  
cagcatcttctcgagctttggcaacagctctatgacgaatccatgctgcaggtctcgaagtattcatcatgagaaaccttgcctctctca  
tcgtcgaagacgcaagTTTTcagacataaagatttaaggaggtaaaggcgactcggTTTTcgcgttcccttgcggcttccggtccaatgctg  
cggctctagctttctacggTTAACCAACgctgctctagaatagtaagcatctattttaaactctcttttgccttcttggcataaactgt  
tcatcggatactgtgtaggaatgctggcttcatatttaaatgggattcaacgaccgatcgaggaaggcgagaaacacgatgcttataataa  
ctctgaagctcctcattctttacggaattctcttctctgttcttaattcgcgatagagccttgcgtactcatcttctgctgctgtttctcgcg  
ctttcgtaaagccgagcggctcgggaaggagcgaatttctctctatgacaggaaggagatcaggattaattcttctaaatcggcagagttgat  
gggaattcaagcttgcgcttctcaagagattgtcggattttctcggcctgccgagcagcatttcaatccgggttctacttcttattacc  
aatcttgactgattcttgcagattagcatggattgtgaaggctaaagttcttttgcgttcttatagcgatttgcctcattcctgataca  
attgctcattctctttccgtgaaatggtaaattcgttagaggcttctcttccagagaaggaagagcaaagtctgcaaagcttcaaagc  
tctgtaaattgctcattcgattcaaattcggcaatccataagaggtttgcctcctcagcattcgtgacacgacgccagcaagccagcttgcg  
gacaatcgtaaaatttatcaatccaaaatcattattcgttggaaatgtcccccacacagcgttctcgaagctgctgagtggttgggggga  
cgaaggacgtgattcctttcagtagtactctcattacggaggtagatggattctttctctcatgccagtaaccttggattcttttgatt  
ccctgttgatcttcttaaagcatgagtacccttttcttgagctttcttggtaaatagaccaaattcagtagctggtgagaaaagtcgaaagg  
agtagcagcatctggttagctgctcaaaaatagaattcgcagatccataaattactataatgctccttgaaccggctggcaagggtcgaa  
ggcaggttgacaggaatcgcgtatggaatgccattactcatagcagggacctgttgcctggaggaacccaacagaagctaaaatagttaat  
attcataaaaaaaaaaatacgaatcctacgttattctgcctctgatgatattggagaagagtaggttctacgcgttctgcaacaata  
agaagagctcactaagtgcgttgggtgctcctaatcaaaactcacacatttatacaatatcctcaatatttaacgtattacacattttgctta  
attcgataactgcatcatagcacgtctgattttgaacacaaggactcctcttgcgttgcactaccaagagttctactataaaatagaaat  
ggtcgggctattaatggattctgtgagcggcggacgcgttttctgataatgaaagggaaatgaagacaacaaggtatgtggttgttttgc  
ggaattgtctgtttatgagaaatctgctgttatgattgggtaggaagaacggcactgacaatttgtgtagaacgctgaaagaatcaagt  
agtctgaatcgaatggttctgctgcagaaacgaaagatttagcgcgtgtgtcacggtaggaatagtcttccaagccttctcaggtggat  
cgtatttgatgagaaacaatgttctcagacaatttaaaaccaacgattttacgaaaaaccagtgaaaaacgttctcgtctcgcctcggaaagct  
caccgagcaagttctgcccgttatacgaactgtaaattggcaaaaatagagacgctgggatattaagaataagcatttcaaagag  
gcccgatgatagctgatctgataattcagtgatctggtctgttcttacaacgataccccctttttgggaaacagaaaaagctaaactttt  
tttaattgggatgctaattttcattaccctttgatgcctccccttatacacaatacataatcttattccgatttagagttcaaaggaaactgccc  
tgagtgatttgggtgagctaatcttgtgaaaaaaaacgattcgaaggagaaccccttctcagaagacgaaggaaaaagaagtgtgaa  
agctgcttttacacaagagtccaagtcctttaacagcttcaaagcctcttttgaatatttgaattccaattcatttcatgaatttaattgac  
gtgttaactcagatattccttaaaataaagaacaacagccgacttcaaaacggtaaagacgatttctgtttgcttactactctaatTTG  
taagcgtatgatgtatttaacgaggttactatcttgttcttcttcttaccacaaggcattcggcaccaaaacaaacttctctgaaaca  
caacactgtagccgctgctgagcggtaattatcgaatcagaaatgaagagtaaaatctggtggaattgtcacgctagaccttaacatgtt  
tggccgacttttaacttgggattctgttccattctgtttacgtgaagccatattgatattcttctgtgacaccttggctcatggaatggccag  
tatgcagctgggcagcccccgaatcgtcttttctgattgtcggtagcgaagcgttacagaatggttatgtgtagtgaattggtgtgtaa  
ttttacctcattccgtgctgaagcagcgtatcttttctaaattctatttttttacttaccattttatgtttaggtgatggattgcccaga  
taaactctcaacccattctgaaagtatcgtcggaaaggccagacgtacgctgcaccgttcttaccatcattgtttgaaatggcacgtt  
ggaattctcacacacggttccgactgaatctcgtcctggccatgtgattgattgctggattttatgaggatgtctcagctgtcactaagggtg  
gaagcgaatcctgaaacttctgactctgtatttaatacaagctcgtacatactttctgttgggtccgaggacatttctctatgtttcgaaggagc  
ttcggatcctgctgtagacacgtttatgtatggtcctgaacttggagctttccagtagcgggattgtgacagatgaatgggtatttgataaa  
gtcgatcagctttcagaggattcatataaagatcgtaaactatgggatctacttcatcaggataaattagtttcttttgcatttttgggaatcgat  
accattggacataataaacatccgattcaattgattacatgcaaaacatccagatattgatcaaggaataaaggatctcgtagaaaaagcaa  
tcgttattcagaggatgacaatgcatctgcttgggtatttacagccgatcatgggatgagcattatggaagtcatggagacgggtgctccagaaa  
atactcggacccaattattgcttgggtgctggctttctgggtcccacttatgagaaaggcgtaggtcacgatgaatattctgctccttgggattg  
tcaagtgtgaagcgtgtgatattagacaagctgacgttgacccctcatgtcacttagttggcgtaatttcccgtaactctgtgggtcagat  
tcccttagatttttaattgtactacgaagagaaaggctgaaattcattaatgaatgctctagcaatcgggtaacagtacaatcgtaaggcttc

ctgaaggctaaaagcagtttccatcttcgaccctaccctcctctgaaagattatgcaaattcgaacaacatattctagatctagtggaaaatcata  
tacaagaacaactcaaggaaggatccttgcaagcctagagtttccagaaaccgcttacagggtctcagatattcagcggtatgattgg  
ttcttttgcgatcgatagtagtactcatcggtacctttctggatcagctatgtgatacctttgttttagtaacaacacgcatcctgatatgaaacaga  
aaaatcctataccatcttcagagggtatctcaactcccgttttaattttatcttcattctttaccatcaatcaagccggtattttattacgcat  
atcggtgttcccaccatctcgtgcaactatataatccgacttccctaatgtcaagatgggttacagaaaattcatagaggacgaaaggataag  
cagtggattttctgtgtataacttaataatccattgctgtatctcggactactcaattcgtgtgatacagttatttccatcgtgaaggattctca  
gtattcttaattatcttgcgcttggccttggcttctcactactgactttgtttacttcataaaatcttagccagcaagtggtcatttctaaacattca  
ttatgtttttactttattaccgcaactaaaaagagtccttgcggtgattttctgggaggttagtaatgattactgtaggaggttcataactg  
tctatcgaaaaagacaaatcttcaattgaaatcgacagtgagaattctcactctcgtttcaataactaatttaattatgtcatttatcgtgacat  
taaaattgacagattcttacaagaatgtgtcgtatcgccatggctacggatgttctttttcttattgattgcttctatgtgtaccctgtca  
aaagtaaaggcgtgcaatcattactatttagatcgattagcagcttgttttaatgttctccgacaatgtgtatgtgtcaatcattgaaagcc  
ttgtttacgtagctttttcttaactattgggttatggatacaggtggaagcgaaactcaagaacatataagctgactatggacaacaatggta  
aaaaggtaaagcaagcttggcctaacaatctcactcagggttccctattttttacattttataaatattgcctttttggaactggcaacat  
agcatctctatcttcttgcgcttgcgctcaggtcaagcagtgattctcttaccagtaagtgcgagtgtagaaactatattgtgtaaactat  
actaactttttttcttaggtgatgcaaggtgctctattaattatataattatccccttctcgcgcttctgctgctcctcggaataatgaacaa  
gagattaggaggcattcaacggattactttttcatggcgattgctatggcagacttgttcaattaactttttatctgtgaaagatgaaggatc  
atggcaagacgtatgtgtatacctcatgttgagacaattaactaattcttttagattggaataagtattagtcacttctgattagtaattgttaat  
tctgtttataagatttttagagcatgaggtgctatactttcagcagcagctcatatcattgttacggaaaaatcaaagctaaactgatgaaggaat  
gaggttattttttattattcacgaacgtaataatcatattttatcggaataagaaaagaatgaataatagtaataggttgattagtgatgac  
ggcgaatatagaatacaagaacgaatgtgtgaaatcgaacgataagtaagaagagaagaacattaaagctgcttaagcaagaa  
aaaaagaatttatgtgagttactcaatcatgttgggatttccatagcgagacttccatgcaagaatccgcatggagaatagatagaa  
ggcaaccttaggaaaaactgttctttcatctacaggtaaattcttagcagagcaagattctgagctctataacgcaaagttcataaagaatc  
tagcagctttgggtccacggattgggagtaagtcaatgtaaaacgatcctttgtgtaaaagttgctcgacatactctccactaaagtgag  
aaattgcttgatggaatattaatggatccaggaatattgcccactcataatcatcatcacgaacatcaattacggaaattttcccggctcctg  
ctaacagatcttttaactttcaggagaaatgtaattaaagaactcatcttctaatgaaattaacgcaaagtaaaaaattgagacgtagtggg  
agaggagaagtgatttctgggaaagatgaaaacaggtaacgatgttctctatcgaatattatataatgattaatgatgagttatgtaagtag  
aaaaagaagacacttcttagagatgcaatgtgctttattgtttcacgttgatgggttttaacataaaagaaaactgtgttcaatcgctatt  
atatcctttgtcagcttctgtgtgtaaaagagggtccataaataaaagcgaataaataccaatagggttaatccaaatgaaaaagaatatt  
gagaagaaaaaaaattcaataagaatcaataaataaggaactggaatgagtgaaacggtaactgagaaagagtgctccaatggggaggatg  
atttgtaaatttctgatagattcactactcattatttagtccgggattgtaaaaagagctcttttctaaatcggtctgataatttgattctgaagt  
aattgttgcacttaggtccttcttaactgcctttagcaagtgggttctaaagtgcgtgcaatgaattccataactctgataaataaagaaa  
aggattactgcaacagcaacaacacccattccatccaataggtctatgtttgaatacatcgctgttaatgacaggaatagattgttgaaaa  
actgatgcaaaggctaagacaatagagcttgcgagaaatcgttttcggctcagcttttaaaaaatagcgaagttcattcactccaagggtac  
ccatctaaatataaaagtgaaatgtcaaaagtttttacttcaaaaccataatcaaaacggaaaatgttactacagagaaaacagcagaacggg  
cacgaaatacttctcagccatcatggttaataggaattgcaatcatagccaaactcgggtccaaagcataaacaataacaacccaggtc  
atcaatgacacgacaccaagaaaaaacccataagatatcatatcgcaaatcagaccttctgtaaaaaactcctactttgttatcatgaggaagagc  
ttcattacatctggttgagcttctcataccaaggccatagaaggaaaggaagacgtaatcatattgcaccacagaatttctacaggagacat  
tgggaaaaccgacaaatggtggatcacgaaatgcaagaccaacgacaaaaggatcgttcccgacgtttgaaatataaagggtgcaaaac  
aaactcataatattgtcaagattctacgaccttctcaatagcattcaaatgacgaaaaattatcatcagcaagacaatcactaacgtct  
ttagcaacatcgcttccattcaatccatcgcaatcccacgtcggcttctttaaagaagggaatcattgacaccatcaccagtcatagcaacg  
aaagctcctctacgatgcaagaatgaatctttcacttttagtttgcggtgcacatctcgaatgaccaagcaaaccttctatgtgtactt  
cttggcggatagagcatcaaatgaggacctgtcatgaccatccatgacatgttcgggtctcgatctgaaatgaatggtggaataataccactt  
ctttggcaatggcctttgcggttccaggtgatcactgtaagcatgtgtacgcaataccggcacgatgacagagctaacggcgcctttgatct  
aatgagaggaggatcatagattcaacaagtgtatgaaatcaagttggactcaacatcttcttaggaacctttccaatcaccctaaatctt  
gattgatttttcccaagcacaactgaagccttgggacgcaagcgtttccattgtgcaatgcaaggttgcctttcattatccaagggtg  
gaccccaatggttcaaacgatcaaaacacgctcagcggcaccttggcatacactcaggcttgccttcttctgtatagacaacggcca  
tacgttaagctcagaatcaaaaggatattcacgtaagggcctgtgctttttaaagcttcttttcccaattgaagcgagaagaaaaacgt  
gaagagcaattcagtggttaccctttgcgaccaatctccttcttgggtcttttgaacagaagatagattgcaaaagagaggaaatttgagagc

tggaattaactcttcaaaagcatgtaaggggtgcatctcttgaggcttctgattctcgacgttctgacttgctccatcggtgatgaatgatagaaa  
cggtagctattgttgatcaaagggactggaagttcaattacaagaaatccaaggatgggatccatacacgacgagtaatcattttcttgag  
tgatggtaccggtttgtcagagcaaagtgcggtgactccacctaagcttcaagggcttctagttacgaacaattacgcgacgattagacatatt  
tctttggccttagcattgtgatcgaagaacggctatcaaggattctggaatgatgcaaaatacctagtgaaatagcataatagagacttcatt  
agaaacatgaaaagtatgagctgccattactacaatggcaagaacaatggcgataataaacaacacataggcaaggacagtaagcttttgctg  
aagaggagtaccaacattgagaccgagaatgcgtttaagataataaagaaaaacctggaacgataaattcggagatttttctgtaattttctt  
atctgggtcaggcttttgaaaagaattggatttgacgcagactagctgcaatccaccaatctcagtaactacacggttagcatacaaat  
gccagttgcgacgttttggtgacaacagatgaggagtaagcaagattgatgcggtctccaatgggaacgtcccgttcatgtcaaaaacgactt  
gagcgttttgatgacaggaagggtaccggtaagaagcgttcatccgtttcaaagtgtggtttcaacaagcggagatcagcaggaacg  
acgtctccagcttaagggtagcgatataccgggtaccagcaaacgagattcaatggtttcgcttttgccatcacgtacgacatgtgcataggg  
gaggcgagagaacgaagtgagtcacatagttttccgattgtattctgaaaaaacctatgacaatgttgaggacgatgatggcgatagac  
accacctcaatccaatcagttgtaccaaggaaagggctgcagcaaggataaggactacacattgcattgatacttgccgaagaaatatt  
tccatgcggagactctgcatcgctttcgagacggtttcgcgattcagatagcgtcctggtgacagaaagaccagattgaatatt  
tgtttctaattgtacctcagcatctgaatactggaaaagtgatgggggttttaagcgtcggcatttgcaaaaatgtaatatagagaaaatca  
acagtagcctagaattcgaagcacagatgagaaagtattgtggtcagttttcaagagaaataaaattcgaatgaaaataactatgaagaa  
aacagctgttcaatgaaagaaatcaacaagcagaaaagaatactttgaaatcaactttagctcaaaaatgggttacgtttggcgaggcacgt  
gcaaattctgagaagaagtgtgaaatctaaaagcaaacggtgtttttttattgaaaataggtattttgccccaaaaaaaagaggg  
aacaattgcgttccaggttaagaaaagtataagcatgacaaggaaagaatacaactgttagctattcttgacgcatacaaccattcggctattat  
gtgctgtcaaaaagtgtgggaaatgaggtatcaagtttcttagcgaacgaaggtatacaataatgatgacgtaaacgaagctgcgaattggct  
ataaggtcacggctagaggaaggaggcaacataaacaagatgtcaagagcataggagatggaagaagaaaagagtaatcgtaaaaaatt  
aagttaacgatgaaataatagaaacctgaaagttggagatggatgagcaagattattaactcaacaatcgaagctgtggagaactgtttt  
tgccagacattttcggatttatttctttgtaatgcaattgaagcttactaagttactctgtttcgatgtgccaatttcttaagaaaatttctct  
caccttattataaactaagcggcggagtgctgattctttgtttatattttgataacattaaattattctaagctttatgttttaagtatgatt  
tataaacagactttgtatgatctcactgaaaatcgcaaaaggttaataaacagtagcgcaaaagaagatcgatagaatggaagtctcaaggt  
gtagtaatttctataaataacagaaacatactattgtagatggatggaagttgagacaagtaagttttatgggaaatgttctgtaagaa  
atgtcctctcaaggaagggttaattgggattgattgactctgattgatttctttgatggacgctactgtttctccaactgtcgttgatgacg  
catgcatgctcaaaaatgacggattaccgaatgactgaatattgattgctcctgtttacaagctcctgaaatattacctggttcataaaagg  
tgacgctgattttactctttttctgtttaccagcaaaaggatgtttctttatattgatccgttactttttttttgatcctacatatagtatgg  
attaactttcacgccattcatttagcaaaacattttttattacgaaactaaaagtaaacaaaatgatcgcattgtaaacatgattcatgaacc  
ttcacaattggtatttctagttaccaacatagcgaaccataagaaaacttggtcttctcctgaaatgaaatgaacctctcattgatcttcaa  
aaatttaaaagagaaaaatattcttggaaacattgacttctgatcctattgtcataacatcctattcgggtttaccattatacaacaagttc  
atatggaccaattaaaagataaatccagtcaattccttaataaacagaaaaagaaatcatatacagtgaaatcctttttttcacgcataca  
aggaatatcctctacaaggaaaacaattttctacattcttacgattgtatttttccgcataaaagttttattcttattccgttaggattttaa  
attctttctttctttcttttttaataaatttaattttgtgtgtttcgttctctgcttactttcatcataccttgaccatctattccactctgac  
aatattttgttacgattcattgtctttttctacattagcagctgtttcctaagctctcagatcgtttttactttattgtgaaccagaaaaagt  
ttttttgtctttcattgacgtttcccaatgaccgactccttctcccaacaaggctactcgtactttgtccgtgaggacaactttccttactct  
tgcgattccttacaacgcttctcaacgtcaactgaccaaaggtttgtgttgacgaatccttcatcacattgccattttgttacaggaacag  
atattatattacaaggtaataacatagatattgtatactgtcttagattacagctttacgaattggtcatcaacggctaaactgaacaggaa  
tgatggtggatacgaacaagaattgctttattatgtcgtcgtgttcttagaatgcgcctacgcttagagaccgctgctggatcctttacatga  
accctaccctattcgaagaaaagacagtcacagttcgggttgaaagtgaagctgtgtgtgtgtaacgctaccacttccatctcaataattctc  
taaaatggtaagaagctgcattcgataggaacgagataacgaaaaataatgcaagaaacagatccaaggacgtgtgaaagttcgaccaatt  
tgccggcaactttactcaattactctttgacattctcgttcttttgattgctttgatgattatgctgaaaatcctgttactaacaatgcttaggt  
cgctgctgacaaaaccaccaagagacgtcccgtgtgtgattgagaagtactacctcgtctcactcttgacttccaaaccaacaagagaat  
gtttgatgaggtcgccatcattgctccaagcgtctcgtacaagattgctggttacaccactcattgatgagacgtatccaacgtggtcccgcc  
gtggtatctctcaagctccaagaagaagcgtgaacgcaaggaccaatcgttctgacgtctctgagcttgacattgatcgtgtcaacgttg  
accaagacaccaaggacatgcttaaggtcttggttacgaacaattcccgtacgctcctgtctcctgctcctcaagagcgtttcaaccgtcgca  
gataggtaatgaaattcggctgtaatgggtcctaaaatgtcagtttcaatgtataattttacccttatgaatgtgatgagatgtattgtatttt  
gggcaatttgaagtatgtagaccgaaagttcagaaaattatgtgtatattcttatgtttattttctatgaaagttgtagctcataatgcttaa

agttttactgttcaagcaagtcccgttttagctcaatcggcttagagcgtccggctttaaccggaaggttgcgagttcgagtctcgagtgaggat  
ctttttgggttattttttactttcaacctgttagtaaggaaaagagatattgtactgcattgaaatgaattttaagaaatcaactacagtctct  
atgacagtctacgtttaaggataaaagaagaatgatagtgacagaagatctgacagtttctcattcataaatcagatactcaggttctacggttg  
aagtcaaaatcaccgtatggctgctccagcattatcttttctactacattatctcatalctcataacctggataagtgtttacaattgcaattacg  
actaagagaagtaagtatgtcaacataaaaagagatggtgaaaggaatagatattgctacggacttgggttggagaaagactatggaactaga  
aaagaccctaggaataaaataaagtacaaaagaggtgaagaacttagttctcgacagcagcagcaccacgcaagagaccagttctgcgggca  
gcaataagaccagcctttgaccaggaacggatccacggggaacagtggttagagtgaccaacgtgttgatggttaccaccacatgagggtgat  
cgacggggtcatagcaaccacagagcttgggcccagcagttgcgcttgacctgtacttgtgataagcacgaccggccttaagcaagggctgt  
cgacacgaccaccggcaatgataccgacgacaccacgagcggcagaagggacaaccttcttagaacagagggcaacttgacacgggtct  
tgccagtgtcaacgtcgtggccaacaatgatgacatagttaccagaggaacgacccaaagcaccaggtcaccagacttttctcgacgttggag  
gcaatggtaccttcaggcatctaccgacgggcaaacgttaccacggtnnnnnnnnnnnnnnnnnnnnnnnnnnnnnnnnnnnnnnnnn  
nnnnnnnnnnnnnnnnnnnnnnnnnnnnnnnnnnnnnnnnnnnnnnnnnnnnnnnnnnnnnnnnnnnnnnnnnnnnnnnnnnnnnggttcatagcaaccac  
gagtcttgggcccagcagttgcgcttgacctgtacttgtgataagcacgaccggccttaagcaagggcttgcgacacgaccaccggcaatg  
ataccgacgacaccacgagcggcagaagggacaaccttcttagaacagagggcaacttgacacgggtcttgccagtgtcaacgtcgtggcca  
acaatgatgacatagttaccagaggaacgacccaaagcaccaggtcaccagacttttctcgacgttggaggcaatggtaccttcaggcatctc  
accgacgggcaaacgttaccacgggttaagcagcgttcttaccacagtagatgaattgaccagtgacataccttcagtagcaacgaaggtct  
cgacatcagtagcgttagtgtaagggttgcggaagcaactctagccaaaggagcaccacgaccagggctgtaaatgatttttggacaacacc  
acgaatgtagcgtgacgctcagcaaaagcacaagctgagcagcaccctacgaagacgagtgtagcttggagataacctccgctc  
tttcttctgctctaataacacgtcccattttgttgttttttgggtttaaagaaaacccgacttctgctactagcaaaaagttgttggctg  
tttcaaaccgtgactgtttagcttctcattagggtagggtctaagagatattagagaggtgcaaggataattagcagatgaaaaaggtaaacaaa  
ctaacttttaccagaagagatacgaacgggtcagattgcgcttttattcttaattatttcttattctcatcaaaagagctgtgccttctgttctg  
attcttctgcctggagtggacatcggacaaggtcggtttcatcacttacgttcaaaagatcaactttggttaacctgacaattcattcgcagctt  
gttaacaaaagattgctctctttttgtttagtgtaaaatcgaattttgtctcttctcattctaccttacaggggttgcgtttcggtttaactc  
aaatgaagccagatacccggttcttagagaattctgcaaatcaaaatacctcatcaaaaactgcactcagttggttaaaacagatgac  
ttgacatagatcttgccttcagtggtgtaaaaggaatcaaaagctgagggcgagaaaagcatccagggctatttgaccagtttaaatct  
tccgaggatgccatttaattgatgtttagatctgccaagttgtttagacttttaggttctggttgaagaccagagacgttgttattcttatt  
tgctcagctccaatattgggtgaattatacgggaaaaattgttcaaggatgttctaccctctctattccaacctgtccgacctaaaaaatgct  
gtcgacaaaagaaatctctctggaaatcggatcgtgcgctcaaaaagccgtctacattactcatatcctcttgcctgcgataaaggaaaaa  
gaacctcagtagtgaattgctattgagctttgcaagctccttgaagacttttcccttcttctgatcattgggtcagtttcttgcaaaattcccc  
atcatggatcagcttgcctcaagacacttgaacgaattatgggatttctcatttatacaaaagtgctccgattgctcagattatgatttga  
aggtgcttggccaactctatagacgaattgttgttactatcgaaaacaggttctgaatcttccgagtagtaacatgaatgattttttctt  
ggtgaaatagttataagtcctttagtgatgataaataattcctggactctattccaactaaaataaattgcaatgcatcatcctctctgttta  
ctcctttccatagccttttttctagataacataaataattattatgattaatcaaaaagtaggtataaattataaataattgata  
tatgatctcaactaaggaaatataactaagagtaaactaataaaagcagattatatacacaaggataggtccgcaaaagaaaggttagaa  
aaaaagtaacgaaatctccattaacctttttatatacagcatcgaacacatatgtgctcagctatttccgttaaacctcctcaata  
tatcatcacttgggcccgggacacctgaaaagaaacagacggccattcatccagagatggagaagatgatcgacaattccgggcccgttgc  
aactaagaaagaggcaggattataaattggcgtgccttcatatgcacatagtaacctactagatggcacacgagcacaataggcaggtatgatc  
gtagagtcttgtagcaacgacaagatgcaattgaacgggggaatcaatacaaaatttccaaaatttgcattcaccattaattccggagaatc  
attgcaagaaaaacggagcaggtcgttaaagatgtgtgactcgaatattcggtaagtgtatcaaatgcacaatattagcagacatcat  
gacaaccgggaatccgcaattgatccagcatctcataggtattccctccaacgacttccattgagaaaagcaagcactcatcagaggagccgat  
cgttctgatacaacgcaactgtctagtttcttcttacgacgaatagctgttgcgcaataatagatcttcttccgtcaaaaacagacgaat  
atgaatccgtatggcactaagaggagtaaatataattggataggtatcaactgtcccataatgagacatttctcctcaattgaattcatattg  
aggcagcttcccaattttgcgaacgagaataggtcaacagcagcagatactagaactacagggactccgaataagtctaaactcaccggcc  
agtctttttccagaaaaagtaactacagcagatcgaagggactctaagtaataatttactccccatcatcattgtatagattcaggaaagga  
gcaagaaatgggtaactcaaatggtatactattcgcctggatagaacactcaggtgtccgggataatgatgctcatctgtataaggaggg  
ataatcttagaccacggccccatgactctgattatttctgggtgtcagtggtgaaaaataaccaagagtgatagtaggagactatgttctcat  
acgtctcaataaactaggaggaattcctcaggccattcagctctagcttccctcgaagagtaagctgcaccttacgaagcttaactggcttcaa  
tacgtgcaaacagagagatccgctgaaactgctgattttcactttcaatttattgaagtgttccaggcaatacaaaaacgggttctgcaag

cgcta atgca acccg caggct agaacat gaagaa gcaaaat ccattct cgagc agggta agtca agttt gtgcat cgagaa gcttctt cttc  
gataa atgtgtt tactt gggctcc ggtgaac gggcggt catttagt cgaat gataggat cgaccc cagcagt tttgta acatat ggggaaa cgt  
tgtcgt gatgat gactc ctaata gaggg caagta cataa atata taaact aaaaataaaa agtaca acgtta acaact ctgtaa atgaaa gc  
gaagcca caagc actgcc agaat taatg caaaact caaaag aaaaaa cgtatgt gagaact ttcact gtaa accgtt taat acaatgtg  
ataaaa gtaatt gaataaa ataagcc acggac gaaaaa gacctt ctggat gttttata atctac agttgtttt cctgta taaaaa cgtgt  
tatatg acactt ccagtac agaat gaaat caagt actat tttctatt ccaat ttttat caatag tccggaaa atgggtat ttcctcaaaa atcg  
gtatgt agttag tttgc agtat ccagg tttata ctggct atggta agtagt ctaaaa ataggt agctttat gaaact tactaa caggaacct a  
ctttact ttaga acttat atag caaact ttagt cattcgttt cattcgg tttcgg tcttt caact gaattgc ctcttt catacgtt caaagcaaaa  
acagttt gtcaag gaagga atgatt gcctgt atattact caacataa agaact tgaata atataaaa caaaaaa atcaattact tctcgat  
aagtaata agctat cttatgg agctcgtgttt gagattt ggggtt gattagtt cgtattaga agtattag cataat aaagctt ggtagat agtgca  
gttata atattc gcatat gttttctt atcattag tttcattc tcaaacctt caattgg acagtt aaggtctt tttgg acttgctg taagcgtt gtt  
catctc tgagaaa atttat gggc ttttgg catat ttttag ctcat tttcag tctgca atg tttc tttt gctcat cccatcg atgtgaa acatt  
tgcaag atcatt caatg gaacatt caaaact tttc gacttt cggta cctat ccaataa actcgt attatgt gagaatt cgtttt cttaa agaact t  
tgat tttt cccgat at tttca aaggtaac gccg aggaat atcg taaatc cataacc cagaac ggcaatt ccagt caacc ttagg actggaatta  
acaaat tttg caaggtt ctggttt aaaaaa atcga agaat gaaagac caaact tttt cta caaactt gtaaga acagt gaacgat ggagtcgtt  
tgccca actactaa agtatcgt actcac agatg cactcca agttcca agtctgt gtaagg tccagat ctataa agtcca agatcccta actca  
agcggaa atgctt cgtact gaattgatgt cgact caaacattt ggtg agagcgg aaaaac agggat caaggcat ctgaaa agttctcctt c  
at ttttctt gaatatgtt gaacggtt cactggtt cgtctag caaact tttccg attc caaaag catttct caaggtattgtt gcatagcgtt c  
tgacagaaa ccgata attatag gcaaca agaatcc agaatat ttcac actagaga atgaatt gaggttt caattg ccgtt caagctga atat  
gtgcat gctgc attacgg actgc acagtag actcc actag actcgg tttctgata aacttgc gattcttgat gctttgatgtt cgaactt cgg  
gatagat cgaat tttgct atgtagg aaaaatct ctatcc atacattt atattg taatcg caaatccc gttaaatcc gaaagcaatcc ga  
ctagg tactt cgaac gggagcca at tttg actt ggaacg atttctaaa ataaaggtc gtaagg cattctcc attt gaaaga atgatg agtaaat  
tggattat ctttgg cttgcat ccgacg attcggc agctt caaaa atgaactaa atctttag catcag catatgttt ccggtg agagactt gaa  
ttgat ccaaaa atagac gttgcat ttttctt gctcta atattgt caaattgtt gataata atgaatatatgt gactttc agtaga agcattttt  
aaaaactcgtt gctgaa agagt aaagt gattcctg catttac gaaaa caacaac atc gatttctt tggcaag caaatacc gatgtagtt  
tcatc gaatcag tattcaaacct ggagcat caataagg gcaatgtc cgtatccc attatgt agcaaac tttcata agctgg ccgtccatcatctat  
gtaaacctt cagcatcg accagttt cagtct cataa caagtcttt caaatctt caatag gaaacaccac ataagtaga agggctcc gtaaatga  
atacgtttt accatgtgg cacagcgt gaacga atccttctt atcatt gaattcgtat ctaaaactt cgaaaa acttctgt gcatggctgctgg  
cttctgg gagaat atcgc gatgaaca agtg cattaca aagagtag attacc agcattt aggtctccc gttataaa acttctc gacgatgtatctt  
cactctgaaa acaggg aaaaaggtc ttataact tttcaaaa atacctt caataagg attcatgc gcttctgaa ccaagcctg ccgatgat  
tatttcatc agcctcag atttag catg caaagcca agtca agggtaaa atactcatctt cggagctc gacctg aatattt cattagaaa atgtt  
gattttgctgctc agaggacct caaacgctgt ggaat atgcaattcgtatgctcacgtatt cattcaactc gcttaggagatcctgtaacacgt  
aaattg aacgca aaaaact ttttgtt cgtattg tactgca atgtc gacgattcgtttc atctttgtac tttggatgctt atcccgtt caaatctt  
ctgtttgctta atttgac atcttctgata ccgacg aggcaga atgtttat ggtgttctgg gaagcttttccgac attaaata caaataaa acgtc  
atatactcag tttttttt acca attagac atataat aaaggc actcgtg acttgtt tttact agtgg aattctttt acttttct ataggcttatata  
atattagcctt cggatttcta attatctt ggttaga agtattgttctat gaagatg aaaaaa gaaatcattgtattag agagattaa caacga  
taaacaca acgaaataa ataaattgt actacta actattata acagatggt caacaaaaa actaag tacagctctgaac agtaatgggc  
agaggttatgttctatg catagaa attagctgctgggttcatcgc gaagcca attcacgg caaaactc ttaaaacattag catacgtttctt  
tagttg caaacg agcagtatctt cattaaatgggtatgac gatcttgg agatgctt tacacc agcagacttaac ggtcca ataca agtcgcta ac  
agaatccggatcagctataaa agattta agtctccg attcaaatcctt atgacgctg agaaaatg agcgttgggc agcatcgggtactttaga ag  
ggaaggattctt gtttccgaa agatgtcttctgaaa atgatgtgg gaggagaa acataggttagacgggctatccgaa gacgctacattaaagga  
tttactt ggtacgtat caaaaatc atgggatcctggcgtactggcctc cacttccacttatta agtctgg agtgaa atctcgtcgttctttcagat  
tcggatac gagggatgactgata caagctaa acatag agtctcgc agatg cattgttttctttt gattcatcatgatcatcatctt cattattaat  
gataatctggc caaaaacttcttctg gtaaggcttgcgctta atcctga agggcga agtaattgtctctgatgattctt caatactactatcgtttac  
agaaaataggggggag acttgaaa attagaaa caaaagttgattt ggtcattgaaa atactttttggat caaattggaatcatcattagcatc  
ctgaattgtcggagac gccggc gagaag aggaataa agaggtgc acttccacttctttttgtagctaa ccaagaa actgaatgtcggat  
ggcttg aggaataa actgatcattgtgggaa atcaatgacg aggggtattcgttttctcag agtgatttttattg aattggcgtgagatttctc atc  
ggccagtttagatcc agagctagcaga gaattaggacttttagatagggttctgtaaatcaatcatttccc gctgagtg aatgactttctca

cttaaggttgagcagggcacgaaagaggccgatcagaatcgggatctaaagacaccggtgaaattatTTTTtagagcgcagtgacaatgctc  
gttttaaaggagatgacgcttatccggaaatTTTggagtaggacaatcatgcatgattgtgaaacaattgctcgtcatcttctgatcttctgtt  
tactcccgtcattattatcatgttctttagtcggaagaaactgcatcctgaaagtctcttctgaatcggaaataacaacatcagtagggcga  
gggaggaatgagtggaagtttgtgaacttcagtaagagcagtatttttcatcatcatcaatagcatctccaccatttattgactcatcatcc  
gaagaagtatcattactcgtggaaaaactcaattccaaccattttctgccattgacgattaccatggcttcatagtcattctctgacgaaatgc  
atccatgtcaggatccgtagtaggctttatggggcaatTaaagcaccgcttccacacggactctagctacatcatcgcttttctttagatgag  
gcaaagacggagcaggaagagcatttccggaactagaagtatcggaaatTTTgtattgtttggcgtgctaaacgctcactagggtttctatat  
attctgcggtTaaatagccaatatcagagtttctgataTTTTcaagccaccagtaactgttTgaatcatcaaaaagcatcatcatatcgctttt  
tcagcagtaactgtccttccacagtagcttcaaacgcgaatagcataaaacaaatTTtatatcgattatttcttactaatagagggagacgag  
cttaattcagcttcatacagagtaacgcttcttctcatcgattaactcatcatcctcatccgagtttaggttcttaactcgaataattcgtcgtagt  
cctcgtccagatcatagttcattgaggaataaataagaggctcttgattcgttgacgacggataagaagcggcccaatTTcgttttcatcgtcatat  
tgtattccagcgagatcttggTcaacggaggacctgaaacattaggcagattcgaaggcatttcttcatggtttcaacctgttctcaattatg  
aaggctatcggacgaaggagctgttggaaacttccatgatgataggagagttatatcacaacaaatgccaatcggcagcaagaagaagactgg  
gtttTaaatgcttttaaggagtttctagccgaacaaataaaggaaatgagatcaaggcagctttatcaacttatgttttaacacacagag  
accgaatTTtatgatttttaattgaaacaaatTTTcttaagaatTTccctcctgctattttcatccaaaagtattaagacggcgaaatcgta  
ttctattaccagtaagtcgctgctaagacacgtaggtctgaacatagaaatgattaggccgagatcagcactgatttgcgtattacgctag  
aaatattgtcttagTaaatagattgtatgatacttctgagaggtagtggaaattggataaaacaaaacggaatgaattaacaagagTaaa  
aaaatttactgaagaatcgaggttctattgggaccttctgagataaagtgttTgatggacatattgaacgagcaaaagTaaacaaacaca  
gatttTccatccttttctaaactagccggtgctccagtcgaagtttaattgttattatttttaattattattattgatgggTcctctattgtt  
ctaccatgttTccatggagccttaggaagaggtattattcagatcgatgacctcctcattggtTgcataccagtggaacaaacgaacgatcctt  
atattataactTccataatTTTTtatcttcatatgaattTccatagaagatcgatcgatcagatcatcttagTaaagaaacgcttTcaacaat  
tccaagTtagcataggtgcatttcatgaaataaaatagcaattcgtttTgttaattaagaatatcgaacgaagtTgaactTgcaaaaaaaa  
aaaacactTaaagTgatacattgcattTaaagTgtTccagtaattctcatagaataaaataaagcaagatcgaacctTtTaaactcttagact  
TgcattcatatgagTataccaacattttagcttactgaaattgatgctTcaacaactTgctgtTtaagcaatgcaatacattcaggatcata  
ttcatagccaaaggtcccaccgacttccgttagcTaaattctTaaagctTggtttTccaaagccatttattcaaatatttctcattTaatct  
cgtaacatacagccaactgtattTccaaaacaggTaaaatTgaagccatgctcTgaaccccgtagacacacaaacaggtTtttatattg  
gagTgaaagTcgaacaaaatcggcactgctgtatccgtgTaatagcatattctTgctcTgaaaaaggtctTgacttattgcttTccgTatac  
agagcatacgaattTcgaagTtcatctTcagcctTttTgggagagTgacagacgacaggaacgaaagggggaacggattcttctTgtctt  
ctTaaatctactgttctgTaaacccgaaacatgcctagcgaactTtaaagccatctcgagTtggcggaaagctgTaaacacctgttTcga  
atctaatagaacaggTaatTTTgtTactgactgTtctcctcagTgactTgaacataaccgacgggtTgactactgccaacagTcgtTgtTgct  
gctTcggaaagggagccgTccatgctccagTtTgaagaacaatcaagTcagcaaccttctcTgTcgccaaatgtTttgacgccaacaacc  
gtTcacctTgggtcaatagTtctTgacggTcccTgggaccgacagcaaaaggtgacgctTgtTgaacgagTaatTgtgacagactTtacg  
gtTgtTccgacagccaaacggataattgattTacataccctTttTgatgTttTcaattattTgtccagTtaggatacaaaactgcggaatcc  
tcagTtagTatggattTctgTacaaggcTgcccattTcggaacaggtTattgaaactgacTcTgatacattgagTcattcggaccaaggagaaga  
attccagagggataaaaaatgattTtaaagagaggtgattTgcggacctTtcatcgcctcataccataaccgagTtagTcatatcTgcatag  
tcaggacggataattctgtTgTaccagaggacatTcaactgTggaacagcgcgatccaaaatgTaatgtTgtagcTccacgTttg  
gtcaactTaaagctgTcgaagaccaaagacaccagcgcgataataagaacatcattgaggtctatgTgTaaaactatattcaaacgTaatT  
actTgaaagTtttctTgTgTaaacaaatggaaaaataaaaagTacgaacctTtctgTatacaaaaaagacaagggcgaagaaaa  
acgagTaatgccaaggatataattcaagataagatagataacaatcTatggacTgacttattcctTtaagcactTgtttacataaagTtac  
gtTgcaaaaaacagagTctagTtagaaaagaaactaccgTatatatgaaaaaacgTaaacaaacattaatgTctTcaattgTtatcaata  
agTatgaaacaaagTaaaaatgtTctacagTctattgTtTcaattgaaTgcgTgactcgcTattgattgTtTcaatgagTgTgTactact  
atacctgaaagatgactTcTgTcagTtTgtTcatgTgtTttTgtTataacagcTgtTggTtacactgaaTtTctTaaaacgataatagagggaaac  
aagTtagcggaaactTaatTtacgaaacTaaacaaactTgggctTatgctTaccatccaaacaccagTactTaaactTctccaaacacaaac  
acaaaataaaacaaagTcagatgggcaattgctTatctTgtTgcaacgataataggggcaatataatataatgatgTcaacaagggacaagaat  
ctaaagatgaaacgTacgacTtTactggcagatcgagaagagaagctgtagcagattTgtTaaatTctTggaagacgTaaaggagagatt  
ggatgaaagagattgattaacgaattgTgTtagaagaatgaagTgaattTctatagcgaagaaccattaaggcgTcaacaattctTcgtactct  
gacaacattgactTcagcTatcagcagcTgctTgtTgcaaaattaccgagaaaggtatttagcagTgattTaaatcgtTttgTattgctTg  
aataaacgactcagatgTatagattcgtgaaagTggatcgtgaaaccattgaaaccgTttTgtTttattcaaaagTcctgacgccgagatccaa



gagctgcaagtgtgcttttaggcaatthggctgtaaagccgagaataaggcccttggtgtaactaaacggcttgatctctaattcgccaat  
gatgtctccccatgtcgaggtcagtgtaatgcagtgggatgcatccaactggctacgttagacgaaaacaaatcaaaaattgctcattctgg  
cgcccttgacctctaactcgacttgcaagagcaaggatatacgtgtgcagagaaatgccactggtgattgcttaacatgaccactcttgtaa  
gtcttcctcatacaccctttgcttctgattcttatcatctttgtaaactgcttgtagtaacttaataccttagatgaaaatcgtaacaactcgt  
caacgctggaaccatactgttctcgtttccttacttcccagcctagacgccgatgttcaatattattgtacaacttccatcagcaaatatcgctgtag  
atgccattaccgtaaaaaactgctcaaagcgaaccaagttggctcgctcttattccaactcatggatactgtagtccaaaagttcaatgcc  
aggctgcttagcttgctgaatcttctctgatgagcgtaccaaattgaaattgtccaaagcaatgccttgccctcttactacgtttactccgtt  
cttcttatcttcttaactcttgcatctgtggcatgcgttcgaaatatactatccatcccctcaacgaatcccctatcatagatgttggtttctcgc  
ccttagtggactgtctctgtaccgaaaatgaagaaatccaatgtcatgccgtgccaccctacgcaatttagcagctagctcagaacgaaac  
aacgtgctattattgaagcaatgctattcaaaagcttctgtacttaatttagatgctccagtgcagcgtccaaagcgaatgactgctgtcttg  
ccgtgtggctcttagcgtgaatttaaatcgtattgttaaattacggtatataatgtccttatcccttgacagattctatgtcaattgaagttca  
aggaaattctgctgctcttagtaaccttctcaaatgttgactatggccagtttattgagtgtgggattctccagcgggtggaattcacg  
gttacctgttcgattttgagtaggaagactctaccttctcatatcgccgttgacgattgtgcaattactggaggctggaggtatgtttattt  
tcccttttttttctaaactcaattagttcctcgattaactgcattcaatcaagcgacgatcatagaaactctgaaatgatagtttcccga  
gacgtgaataatggagaatgaagacggtgaaggagatgcttttactgtcgggtcgagcactgcatctaataagacagcgtgatgctta  
atcgtcttacaggcaacatacactctatatagttttcatcaacattcttctcgtcattcatctgtaatttttaataaccgtctttttcaa  
atattaatattagataactagaacctaattgattgattctatttactaatgaaattattgttaactcttcaattattcaagatcaagtaa  
tggtgtatataatataatgttttttttcttttacgtgcatataagctacattaatttaaaagacaggaatgtctataaaagaattagtaattaacata  
atgccccaaaatgaaattgtacataaaacaactcaaaaatctaaaacaggtatagccatactctattctctaatgcttcttttttactgatt  
aaattttcaaaaaacctgtcaaaaaatcccttttgaggatttctctagaactcttctcaggttcgaagattgtctgtttattgtgggttctggc  
tgatgcctaactgctgagtttaagttcccgtggtcgtatatactttgaaatctggaatgacgattccgcagcttgagaagataaatttagcggttctga  
acgactgtatactggtcaattgaacattagagacgccactttgtgaaggtatttttctgctcaggaagattttcttgaatagagcagcatg  
cggcgtgaaagcagacgcaagaggaacagtcgttgaaaattgcgaaccggaatcattggggttacttttgaatcagctgcaacagacggtaat  
gaggaacttcggaaggaattgagattcagcgttgcagttatcgttttccgctgtgttcttgattagcagcagtagaatcgacaggtt  
cttcaataagaggaatagccggtgaaaatttggtactaaatgaagtagacacaatcgggaaagctttgatgaatattgaatgaagtcaattttg  
acataattccggccagtgatttattaatccttcgacaattctagcttcaatctcgttttccgtctcaaaatgcatgaggttattgaaatctgagg  
atcggttggatttcgaaagatccgtaatggaattccctaataatagtgggccgaaaataattccaatgctcagatttcattaaactggaatcttt  
gacgttttccattgttctcaagttctgttctgtagtgaacctgcccgaagagccatgagactgcaaacgagagaaaagcggactatag  
agtctatttgagcaatagcaaaagcgtcaactcagcccacacatctgatggttaaagatgacgattcgtctaaaaacaaggaactaacatggtt  
aacacatccttcttccaaaagctcctggtaaaagcattataaaacgcttaagtagacaccgagatcgtactcgtagggaaaccgattctc  
tgaaatgctggaggtctcatcaagccaataatggggaggagatgaataatgcctcattatggctttaaataatcgggctgaaccactattcga  
aaaatcccggtagatgaagagcatttattgacaaggtatatactgactgtgcaaaaacatggggaagtaataaaggaaatggagccagctcat  
tcgtttgaaaaaaaacttgacaggtcttcagcatagttactcaaatcttccacggacttgccgaaaacggatcagaggggaggaggtgtt  
ggacggtaccacgatgagaaaattgaagtagttggtcaaagagcgcagatgaatccctggagactgctttttggagaataggaggaggaagg  
acggcgtagaagggaaagataagctagctctgccaaggaggtttggaagggctgcgtttaggggaatcttgagtggactgaaaaaaggttc  
atagaagctctgagtaggagaaaaatctcggaaattgtttgcattttttagatggagattgttggggtagaaaaaagaggtcttgggaaggt  
aagatagaggaaacgggtccttagaaggtgatgaaaagattcatcaaatgttttcaagaacagctggttcttgacgtatacgcctgttgt  
tccttatccagagacatctccggtacaaaaggaaggttttaggagtagcttaagctttgtgggggatcctgaaggagttacataacctatcgt  
ggctttggtgaaggttcatcaaatgaattcaattatcaaaaggtatcatcctggatagtagtaactgaaccgattcccttctgattgattagccacc  
tcctctaggttcttcttggagattgtaggtattgaatagattttgataccttcaagtgctcttttcggagctcattgtatttcttcttcttctt  
ttgaaagtaactcgttgaagcccaagcaggttcttctctgaccgaggtttgggtacattcaggtactggagttggttccagtaattgtt  
caagaggttttcttcttccgttccgctgaagattcgagatgggcccaccatgtttaccgtcaggatcgaaatagcatgttccgagtt  
tcgacataggacagagtttagacaaaagaaagctaacgctctttaaagagctttaaattattgaatagactttgatagggagtttcaacgt  
cttatgttcaaaataaataagagagagaagtaggcagcaacagaaaatattcgttactttgagtcgaaatattgctgaagtaacaataaaca  
aacacatagtttagagcaagctgtaagagcgtttggcaagttttttagtataaaaagattgaaacgatgaaaaagacaagagtacagggagc  
ttttggtttatgcacatactaggagttgtgaccttctcatataattgctatgcatgattaagggtacgatattacagatctggccagtgga  
caagtatgttctatgcaattattaggagattcatttatgctcatcacactgttttactggttcgggaactgttgcatttgggtgattcactc  
gatagaatgggaacaagtcgaaggcgtccgcttggctgctgtgcagggcaaaaaggagttcaagcttctcgtcgcgaaaccttgaggattga

ggatgctcaggaaacgtggagaactcgtatgaagagcacatctcatctgttatccagtgagaagcggctgtaaggcctgaaggttaattgt  
agatgcagagaaaaataaattgcaaaaaaaagcctcccttcattcgcagtagaatgattttagatcatcaacataccagcaaggattgttctc  
atgataacatttctagtaaaagctgaaaagctgtttatggccagtagagatagccacaaagctatagcaataacggaaaatgtaagtagaa  
aacagcatgactgacctctcaattcaccattttagaattgcgaatcaacatgtaccaagactctgtagttactacgatactaggcagaactact  
ttatgaaacaatctatacaattctgagaaatatttatttcttctcgtactctatTTTTtagatcaaaggttaccaaaatgaaagtgaaggtctata  
agagtcaaaacacttagtcgcgggcagcagtgtaggcaaccaagcaacaacacggcgagagtaaccgtattcgttgcgtaccaagagacga  
gcttgacaattggggagagagttggataccagcgggtggcatcgaagatagaggagtggtgtcaccgatgaagtcagcagagacaacagcgt  
cttcggtgtagcaaagaacacccttgagggggccctcagcagcagccttgacagccttcttgatgtctcataagtagtgggcttggcagcttgc  
aggtaagcaacaacggaaacatcagaggtagggacacggaaggccataccggttaagcttaccgttgagggcagggatgacctggcgaca  
gccttagcagcaccggtggaggaggggatgatgttatcaccggcggtacggccaccacgccagtcctacgggaaggacctgcagactctttg  
ggtggcagtggttagcgtggcagtggtcatcaaaccttctcaataccgaaggtgctgtgataaccttagccaaggagccaagcagttgggtg  
tgaagaggcgttgagacaaccttctctcgggcttgaagtctcgggttgacaccaacaacgtacatgggagcatccttagaaggagcagag  
atgatgacagccttagcaccacctcaagtgagcggaaagcagctcattgggtgtaaaacaccagtgattcagatagatgcagcggcagc  
ggaggccacttgatgttggcgggttcttctcgttgaagacgggtatggcttggcgtcaatgaccaactgttgccttgatggcaactcacct  
catagcagcctgggtggagtcgactgaacatgtaagccatgtactcaggtcaatgaaggggtcattgacagcaacgactggatagtctta  
gcttgaagagcgttacggaggacaatacgtccaatacagcgaacggtaataccaacttgaggaattgccatgattctaaacagaaatgta  
tgatgagttctacaaggcaagaacaaagcgaataaaaaaagttagaatgaaacaaaaatcaaccaaatagactggcgatttctg  
tccaacaccttttatttcttaattgttttcttttcttttaacttacacaatgagatttctttgttggatgaataatagtggcagcacatgcct  
ctattataatatttgcctcataagaattgccgacgagaccggctgtcagcgcaaaagatccggttccactaagcttccgttcatcacatggaag  
ttctcaaatttctcatctgatcaaatcgtatgctcggctggtaccatccggacctgccagtaagcaaaggaaaggtgatctttctcgaacg  
gggaaaacgagacagaaaaaggcaaaacaaatgagaaaaagtagtgattcaaccgctcggttccgatttccatgaaaaagaacaatttct  
cacttattttgtttcttgaatctttctgctctttgctgtccaaacaaaaaagaaggtaaacaaaagattcttctgttccatcttgaacct  
cgtcgttacttatcgagatctacggaaaaacctgcttgcataatgcaagcgtaatggaaggaaaaacaaagtttccgagttttctaaa  
cggggcggggcgatactagatttccatggttttccgtaaacatcattgttagtttgcgtaactcaaaacttgagaagggggttatgtgattggg  
tcccttttggaaagagaaccacagcagcagaccctgtctcgtggtgatgaggatccggtagagaaaggatggaaaaagggggccaaa  
agcggaaaatctcccaataaaaaatccgaaccgattggtttatgattcgtagtgccacgttcgtttaaactgattcttctgtttaaactgctcttgtt  
gtttatttattacaacagtgaaacgatggcgcttgggtacacgaaatgtaaaaaataaagagatggagttcaagcgaacaaaaaatta  
aacagttaaataaaaaatcaatttcaagacaaccggtctcctaaacagcatttccatgagagcacaacgctggatcttgaacatgtaa  
acagaagttcaatttaatacaagaaaactcatctcaacagctggattttagatgctcaattcataagaagtttagattgcttcaagagtttgc  
agagttgttcttaattttttatttcatgtaaatatttctggtgtagacgtaaaacttgttcatgttttcttttagttgaattgaatt  
atttgatttcttcttcttactgaattcctttcgttctcattatctacatttcttcttattacctgtacaccgattcccaaaaagcttgc  
ttcttctacaattgatgaatttctactgtcccaatgatgggtatcttttcagatcatatgctgcaacgattcctcaatagacactgattcccact  
tcgcttttgggctttaccctgtaaggtccatgaaattccttcttctcgttcttatactcctactacgtataccgcaatgctcaataaaaaatcggtt  
ttagacgaataaacaaggccttccacaaacctgcttctccaccctcgttctttaaatttaacaagaatacaagcatcggtacttcagatcattg  
tatcacttttcaacaaaacaaacaaacaaaggaaaaaggaaattccttcttctcctgtttccaagtagttgtgtacgtttg  
gttccatatacaacacttataaagaacacataccatccctccatgtactcctggaatttaccaacatcaagcattttactttataa  
actcgcaattacagtctaaaagagctaactccggttcatctcaaaaagtcagatattacatattcgacaaaatcatcttgcctatgtgtcatta  
tccaaattcatgtttaaattcttccctgcaatcatcacgatattcctatacaaaaaacacgctataaaatagcaaacgaaatcatatcat  
aaccaccatgtaaaacataattaacaataacgaaagactcaacctccccgcaaaacaaatcacttttcatcatgcttttacttacagat  
tttctcagagacatctgtcttatcgttgccataccaattccaggacgattcataaatgttgggtgtaagcaccgtagcttcaattccattaccg  
ctacctgcggtcgtggggttaaataaaaatcctgatgttgattgcaacatttccagccttattagcattcactgataagatccttgatgtccacc  
aggtgaggcatcaaagaagcttgggtaacataccataaggagaaggccctcctcgttccccctcattggcaaacgttaaaggagcgttctg  
aggctccagcctggaagaaaatccaccaagagagcttccattgcatgttactagacatatcacgagccttacaacaggagcatttgcagtc  
gcgttacttgttcccaatgcttctcagctgccacttggtagcattgtatgttactgtcctcaaggataggaggggaagtcatttagt  
ccattctgataacgtaacctgttgggttggccatatttatttgcgtaaggaagagatccgtagggatcagacatatggaactggatac  
ataggggggaatgcataaggttaggttctgtgaaatcacagggttgggtgcggttgttgggcaatgaaggaatagctgccgatgtcc  
aacttattctgacatactatgcatctcaggggttccactaatggccggatcatattgagaatattgtgaacgttattgaagtaattggggatg  
ctttgacctagttaaagtggtgacattccactataagcagcatgagcagattgttgggttctgggcagcattgggtccaaagccaggagctgcg

ccatactcaacatgctggaattatcaaaaggctgacattagcctcagctctattctcaatggtttccaaacctggatgaataaggcagattg  
gatttatcatgaacacctgccatggaaggctggttatatgactagccgccacatgggcaaagaagtaccggctccatattgctggggagc  
aatacctgcatagctggagaatacatagccataaaccaccattacctgcttattaccgaaggagcattaccagcgggtaaactgacttgagg  
ggctccggaaccaactgccgaagtagcagaaggattgctttgacatcaaagtagtagttatcagcagccggagcatgaggcaattcagaagca  
gagacttgagcctcaaattgtggttagtttgaggtaaagaatctgtatcgtagcaagagcaggcttgctatcagcaaattggggagggtgc  
ggtttaggagatacataagcttctgtgaaggcttctaactggttggaagtaaatgcagtcggggcagcagcaggtttgtagacaatgaatcat  
caccaccaagagttaagctaccaaacgggacttgacctttcagggattgagcagtggtggccacaggcataacgacggggaactgtcggga  
aagcaaacgagcagtagtgattccattagtagaacatgaaatccagtcacaagaagccttggtatctgaagtttagttgagaaggagcagaa  
gtagtagtagaagctggaatggagccaacctgggtttattaacggagaacacagcaggaggtgtggggaaactgctgtttttgtgaggtag  
ttcctgcttctgctgtagggggaacagcaggttcagcaggtcagaagctaaaggaacaggtggattcaggggtgctcgacggcagcagttg  
ggggagcgggaaggcaattgagcgggttagaggggttcgaaggcttgatagcagcagcctgtgaagcctgctttctttgctttgcaatagcag  
ccatgggggtttggatgactgagaaggagcagcaacagtagcaggcttatcggttggggagggatagtcatactagtagctgaagttgaaggaag  
ttctgtttgagtgagcagtagattggcattactgtgtctatattgttgaggctgcgtcaagtttgagggatgagcggtagacgtcgtaa  
catcggtaccaggaacaggttagattttgaggattcagaggcaggagcagtagtcgattgtctttgctgagtgtagctttctccttacgagaag  
gctgaggttgcttcttaaaagtaggagccttctggatttctgtgttagtttaggagcggcagcatcagaatcaactggttcgactttggct  
ttaactgcttagtaggtgcttcttcttactgtccccattgagggcatggccttcggaatgtgagcagcagcactccaagtcatgacctgctt  
ctccaatgcaaaaacaagatcatccgtagtccactcagagaaaagtcttcagggcagaaactgactttaggatctgaattaagtttatag  
ctgggtctctcactttcaggtgagttttgtagcattcgaagaacctgcttcccttaggtcctctttacctctgactctacgaggcggtact  
gaatccactgtacggctcttcgctcgtcgggcttatttgcgttgaaggccttcttcggccttttcgaccgaatctttgtttcactcataatt  
gagctgtgatgctccgatgaatctatagctcttgagaatcgcaagaacacgcttacagggtcttttcgacgatattcaagactctttgttctttta  
gggtatcggtttggcagagaatgaaaatggcagcggcagggtgttgcggagcgtcgcgaacaatactgtatttgataacgatgaacaagg  
cagtagctaaagctggtatttattggcggcagggtcgattgttgggggtttatggaaaaacaacagtagacggattactctttgtaagtatt  
ttgaaaattcaaatgaaaggatcaaaaacacttttctgctgagtttgcgaaaatgacgtggattttatactatcagatgaaatattagcagaa  
gtttacgaatagaaggatcagaaaagcacattttatgatcaaacgaacactttgaactttaaaaaggtatcagattcaaaagacacagcaa  
gtcagatgcatcagctgttggttttgttactagcgtattgcttctattgtctatacttctcttagtgagaaaaggctgtgcatgatttctt  
gctgggctgtgaaagcgaatttcataaatcataacaatagaactcaaaacctggcaaaaaggactgcttcggccgggaatcgaaccgg  
gtcgttctgatggcaacgaagcattatacactaaaccaccaaagcttagttgttttagacaaaatgtagatactgataagtaaggcaaat  
gatgcttcgcaaaagcaaatgaatccttgtagtctcagagttgcaagctttatgaacgactcgaacagtgatgagcaaaaaagagc  
agcaaaaagaagcttacagcaccgggaatccatgttctcaacatagtagtaacgagaccctcagacgtttcacttaactcagtgatcg  
gacgggaactggttttacctaggtatggcctgagactcgaactgaaaagatgatgtgttttaaatatttttttaactgaatgtagttc  
accaccgattgtttggaagatattttctagaatgcaattttgagtaacggtctcttcagaaaagtaactgctactcaaatgttgaagtaacatat  
gtataccgataccttaggaataagtagtaaacgaaatagcgaaggcagcaaaagaagcctattggtttgatgacaactcacctcaataaa  
ctctagccctgtgccattgccattgccgttattttctgctctcagagctgtaatgaaaggatattttgatatttagaggattaaaattaagg  
tgcttttactttggacttttgtccctccttggttttactatcaaattcgatagttttcatagctcgttctgagttttgtagagggcaattgatggtt  
gttttgattcctaatgtttaaacaataaacaatgaacgaaaaagagaatgaaaagctgtaagacttgcaaacgagccgaatctcctgtcag  
tttctcctgcaagttctgacagtgattaccgagtagcagccagctcccttattcacatctggatgatttgaaaaagggtgtttatgtttgcatcaa  
acctcgtccctcgtattctgaaaacaaggggacgaattgtcaaacgacgcttctgagcaatgggttcagactactggagtgcttttggta  
gtgtaagagcggattctgtatattctagtccagcggcatttgcgagaattccactgctgcaaaaagaacgacaatgaaggactccgagttt  
tttggtgtattattctcactgatacttgattttcattttatattacgttctcttcttttctaaagaataatgctgaaagatacttcataaagg  
ttcagtagtagtagcagctattctatcatctggccttttggttctctaaactggtttcaggtatgtcagtagacggatgatactgttgaagc  
tgtgctaattaatattgaatgattttattgattcgttatttttaataatggaatttctgttgggttgggttgcctatgttataggctacgaaatgacat  
ttgaaggaaccgagtcgacgggagaaaatcaactcccacttcatgcaatacctctgaaatctctagacgagccaaagaactctaatagcttaga  
gatgaggaaccatcttgaacatttgaacagtagtaagacgacaacaaccaatctagggatagtgaaagcggtaaaaatctgcagacca  
gcaactaactctttccccttaacttttaatacattttgtaagttacacttgctctatttattttgaaacggattttctgcttaaggaactgt  
ttctgttcttcttcttcttcttactgcatattaggtgttctgtttttcaaaagggtgttcttatgtttttcttcttcttctgcatattgggcat  
gaagtcatgacgttagctttgtacatactgtattattcgttctcttccgcttgaattgcaatttctttgattcgcatttgagttgagttgca  
tttgatccgtgtagcatttttaatttcatgttgatagccttgggttattgttttagtttcttttattctagttgttaataagtttgataaacatt  
cgtcaagtttagctgtgttacgggaataagcataggagaagaataccttaccttaccctggaagagaatcaacctccggaacgaatgaa

acagaaaataaaacacacaaaaatgaaaaatgaataaatatgaacacgagttactcactttccaagtaaaaaattgttcaacaattcata  
aaaaagtggagacctgctttatttacagagatgtaaacaaacgcgaaattagcgaattgttactttgttgactcaaacgtatcttcaacgat  
tattaacaataatcgctataagagatagcgtagctgaacatatcactatcctgagcaaaaatgttgcgtaagtgcgaaatttctgctggagc  
caaattctttttctcaattcctccaactgggctcctttgactttcatgtgaatgttggaaatgaccaggtagagctactttagtttggctgctact  
tctgatgagtttgcgtttgcgaaattgttccatcgaatcggatcaacagctttatgtgatgctctttgctaattattcattgatatttctttattt  
attttaggatgtcggaaaaggagctgaaattcattcaagcgacctcctgctgacaaccatgctaattttacaatgttgatttagagaagggt  
atgtttggatacaccaaaagacataaagaacccctccaattcaacttctgcaagccaaacaaagaaaaaacacacaggaatggatcgc  
aaaacttagcagcttgataacgaaaagctatgaggaattgttaaaacaactttctctcgtttcctgataatcttggttaaaagatcaaaacta  
ccgtcattttcaacattattctttcgttgatgttacatttagcattcacaagtttaacttctttcgttggctggaacaagtatattcggacgat  
aaattaagttggcccttctgcaccttaggcctttgcttgatattgacaatctgttttctattttattgtaagtgaagcattttgacaaac  
gaaaaaagaagatgccgttatgttgcataaagtagacttttctcactcgtgcaaaataacaagaactgtttcacaggttataatata  
catatttttgcgaggtgctttaattatgtgttgagttttgtcattggtcccctatgctttgctgttatagcattctgttttggccttggat  
ggaattgagggctcagccgaaaacccagttctcctatgctttctagatatcagcaaaaggatgatgctgtagctcctccgccaacacga  
atgaagaaatagagctgcagagcaatcctaccactcaaagtaatgctaattgtttacctttctttgcatgagccttaactctccgattgaaat  
tcaactaagtgaaaaaggaacattacaagtgtttattccgacgaagacttattctgtcccttgaaaagcgttcttgcgttctaatgttact  
acgaaagcatccttctatcaatatgaattgaaatgacgaagaaaaggacagtagaaaggcatgattcgtttccgccaactgagagggc  
gatgaatgggtcgtttattgtaataacactactggaactaacgtaaaattgagaatcgttggtatcacttagattcatatacaagctatata  
ctttagtaattgcgtttggatgataccaaaagggtgactaatgaattcaaaaaaaagaccttttgggtattgtcacctagcaagtaacc  
gatctgcagcaagatacaacagttcgtatcttccaagacaattgcaaaaagtaactaaaagataaatccaataactttcaaaaagtagaaattg  
taggaggtaaagcctacagcaccggattcccattttgtcctcaacatagtagtaaacgagggccctcagacgtttcacttaactgcagtgatcg  
gacgggaactggtttttacactaggtatggcgtatgttccataatgaaactttgtgaataactaacgctagcgttttaagattcaagttt  
ccaccactgctttttattacctgcaaatggatagcatgttaccctagcaaaagaagtaacaatgattaatctgatacagcgaggggttcga  
gacgacggtaaatagaataatgaaaggcaccaaaagaaaccgaaattgattgatgaccgtttcactcagcaaaactctagccattgccattgc  
agtttcatttctcatttctgacgattttaaactgctttcattttcttttagcgtgagttgtttcagatgcctttctgtgggctttgatgatttttagt  
cttctactactctgggtagtagtcttcgcatatattgtgaccgtttcatagatagttaaaaattcagtttcttaataaaaatgatagaaca  
gagaaaaaatgcagccggaagtgtcaaaccaaccgaatctcctttcgggtttctcctacgggttctgacagtgattaccgcatagacagcag  
atttcttattcgtatattggatgatttgaaaaaggtgtttatgtttacgtccaattcgcgaccaccatattctgaaaagaagagcaagcagcgtc  
catgaatgcttctgaaaattccaacagctctgtattatggttaattatctgtccagcaaaagggtgctaggattccacaagctactgtcaaaaggta  
aatgaaactgctcgaactgtctggtgctacattttgcatttgtgctggattttgtattttcggactttctttttctttataaaaaagtaaatgga  
aaatgcacggattcagttgattctagcggttcttctgccaattttggctttctggatttcttattgttttcatgtgagttgattcatagatattgtt  
ttgagacttttactaatggatcaattatagactgttggatctttcattctgttactaaatcaactaatctctggattgcttcaattttcgtttcgc  
ttgacgttggaaagaaacgacttggcgggtgataatccatcccactgaatacaatccaaccgagctcaaaacctatcaaatgacctaatac  
tcttacagatgaacaacctcttgaatgcgttgaacaatttcggaaagacagcgaaaaccaagtaacttagggacgttggaaagcactggg  
aatttgaaagcagctgattccttggttcgtactctatcttctcgatattttaaactcggcgagctgagaaattgagaggggtcttttcttctgt  
ttcatattcagtttttaattgttacgttatcttatttaacacacttttacgttctgtttttgcataaattatttttactttgactttgattgctgatgctg  
ttaaactcgtggtcattcttgatgctacgatgaaatcgtattgactttgagataagtgaacgtttacataacatggtacgtgaatagattgacattgt  
ttcactggcaatcctttcgtgtgtgatctgtacttttagaccgggatgacaactatgaattgactttgtccctaacgagatcacttttcttttgatt  
acatcttgcatctgtgacgctccattctcctctgtgctaataagaaattacattgttcaattttcttctattttgttactgtaattttgatgtgt  
gccttttctctgtattgtattaacatagcatttaaagatatttctgactgatgttataaataactgcttctgtcgtgtttgtcgtgtagtggtcct  
tccattgtagcatttcatcattggatggcagtaaaagagctctaccatgaaaagaaccttttgaaaaaggacaaaaaggaggagcctacag  
caccgggattcccatgttgcaccaaccatagtagtaaacgagggcctcagacgttaactgcagtgatcggacgggaactggtttttacactag  
gatggccgtagacaaattcaatggtcgaatgtgtgtacatagagcttctgtatgggtactttgctaattgttccaaccgttaaacttatac  
cttaatatctgtttttcattttgaaaggggaataagagtattttaaagtaaatagtagttaaataattatgacgggtctttggaagacactagga  
tattgaggatattttgatcaaatctattcattaagtgaacggcttcatgtatctgttgcgtaaggcaaggacgtttgcaaaattatctcctgt  
tgagatttctgactctcaaatagattacaacaaaaatgacagaatgatatagaaaattcagtgctaaatatgcaaccttctgtacagtaa  
ctaactcgaactcgaacacatttcaaacactagcacaactgatctataaaagtcacactttacgaagatagttgtctgatgattgtttattaac  
gaattctacaatatcattagttaatatagtttacttaaagacggacggaagcagtgctgtcagtataccgctttcatttgagcaaaaacaatc  
aatctattcctatgaacatgcaataaaaaagtttgcctcggcgggaatcgaacccgggtcgttctgatggcaacgaagcattataccactaaac

accaaagcagtgtaataataatagatttcattttgtataagtagacttcatacggacattgctgctaaatgaattagcaaagtaaaatgcgtgt  
atgtctaggatgatgaccttgaagagaacctcgttcaatagagtgctgaaggatcgtgcataagtgggcctaaaaataaacaggataa  
gcgatataatcaggggtcgttagatataagattgaatataaagtgttattgggaatcaattattcacatatacagcaatcaccagttc  
gcaatttagtgaatcgattttcatttaataacaaattatcattaagaatcgattttttaaccgccgtaaatcgattgaaaatcgcaaacat  
tcagagcatcgcattgaagcaggtgggacattacgttttcgtttcactaagatgatgaagtccttctaatttagagtgatttccgtccattat  
gaaacaggatatctaatcagattaattagaaaaatgctttgctttatgatctctgttggcagaggtgaaacgagtgattataaac  
cgtacagcaactggattccattatataatataatatacgcatagtatcaaaataggctcacttctacagaaatgtataggagataatagt  
tcccttctgattactgctggaagctagatgtctgagaactgacctcttttcgtactatgattggagacaacatgggaatccgggatgctgcgaa  
ttgttattagatcaaaaaacagttctgtcagttttctaaagaagtgaggatgaattgttaaaaaggtaagatctgagaattgctgttcaaacat  
atgttttacagaaaggaaagttcaaatccatcccgtttcctaagaaagagaaaattaaagtgaattaccaagttgatgaatgctttaaat  
aggttctagtgtctagcgaacataaccaactctcatgcatcccgaaaatgatattcaaatattagaggtgtaattgtttaaattg  
gagagaaattaacaatccgaccaaagttctccaggaataatacatgaatgagagaagatcatgaaagaacacggaggagattattccagga  
cgataaaaagtatagaatgcttgcctcgttaagatattgcttcaattaaacatgtttctatttcaggtgggtataagccagctttgcatca  
ggaaaatcaagacaaacatcctcgtccttatcgtgtgtattatgacattttctatacaactgctgtatggtccctgtatctacaacaacagtg  
gatcaaaaagatctcgtttccctttctctgatgttctattatagcatgaatgcttccctccccctcaaacggaacattacatctcgt  
tcatcagcaagccaaagtaagccgaactaaacaagaaacttgaagcgaagataggagcattatgtgcttattgacactctgacagcacgaca  
tcagttttctgacattaagattcaccaaatatcgagccaagatgctgttgggttaaaatcacacattttataagcaagcatcaacacgaaga  
tatcaccgggacctatagcagacaattataagtcataatcgtccaaccttagagtggttaaactgagctttcctgctgggtgcaaacctggatcct  
gttgcaagttataagagaatcccaatacatttaaattaggagattaaagattgtctcataaaaaatccaggctcattagatgcaaacgta  
gatgcttctatttctttaaatctcagttgctaaagaattaagaccaactcgtattattataaaaaatcaaaaactatgcatccttagt  
attagatctgctaaatacattatgcttgaatcagtaacttgaaggaccaccacttcccttcatccaagaagttcaagctgtaggagtgga  
gtatataatattacctactggagcgttttgattgataaataatcttctatgaaaatttaaagtgcggtttttttactgcttaagaacg  
ctaagccgcaattgactttctgtttgatcttaccctattccggtagatcttcttctgctaaaagcttaaggaaaaagcaaaagcgtt  
gtctttttattgcatactttcgtatataagtgcttctcactccttcttctgtcaaatcagtaatcagaacagttgagttattgaaaat  
ttttgtgaagttattctattgttgactaccctaaactgttctgcttaataaagtttggctccgtttttctttttttctgcttctcgtgat  
gctttgtctttatgaaggagttctggcgaatcttatccttctgtaattgattgatacaaaaaatctcctgacttttaataactgtgtctc  
ttgttcttccgtttacgactatttttctgtttaccattatgactccttaataattcttacagattttcaaatgtctcatgaaaacatc  
tatatgttccctccactaggaacccccgagttacgaagatgttctgcaaatccgagattattcaaatcaaatgaaccggtaccgaggaac  
agcggccttagagccatggaagtttagagcctcctggaagttacgatttctggttacgatctaaactagaagccattcatgaaggtggg  
agctcctgctcatttaccataaaatgctcagattttatcgaattcctttactcatttactggtttaatcgtaccataatttttg  
gcaagttactatggatattgcagagtagtctcctcctggaatcagttcctcacctgatgaaactttcttaattaattataaaaaacagcgtg  
ttcaaatattcagctgaggaaccacgttcttctcctcacgatcaggaacgatgggggattctcgtctcacagtagtctgtagatgttt  
aagctatgaatcttagacgctgtgatacaaaaaatttatgctatttaaactaccctaaatcttctataagattaagcaatgatgattcat  
tccagcccacactttgaaatcttaaaaatcctaattatagagatactggatcacctcgtttcttctatgctacagcgcaccggaaaactg  
gaagcacctctatataatgtaaccagggcacaacagatgactttcaagcactggaggaaaaaatattcagttcaattcgtcagctcctatta  
cgaagtagcgtatgaatgcctctatagctattgaaaatccgaaagataggtgctcagcgttattagttcagcagactcgtatactggtata  
gagcaaaaccacaaggatgaaatctcctgaggacctaccctctgatgattgttataccgtggaagcgtgtaagtcttactattattag  
gtgatccgctgacaccaggagtagcctcccattgggattctaacaggatacaacctgaaaaatgcgcaagtagtctcctgaaactgagcattcaa  
taacttatcgtgatgattgacctaagagcagattaaagggcatggtgagcaaatcttacagatacatggagactgggacttccatctccc  
tggaaactttggtcgggttcaacctcagaatcttctaatgctcagattgaatcagaggtgattcaaaaaagaagcaaccaattgtgaatattt  
aggacagattactggccgagagccggatcaagtccttattataggtcacctcgtgactcatggtgctggtgctccgaatcagcagtgagca  
ccgctcgttattggatatcatcaacgtttctgacatggttaaaaatcttcatggcgaccccgctggactattgttttgctagctgggacgcta  
aacgtacaataccataggttagtaccgaatgggtcgaacattgaaagaatggctcaagtaaaggcagtagcatattaaatattgatgctgct  
gttttgagatgttctcagcaaatcagttccggcctgaaggacgtggttttaaaagcgtttcatttgatgaacgaagacaacaacctagga  
acaccagataaaagttagatacttttaattatgtatctgacgctactccattcctaacgtacgcaggcgttccattgtggaattggggttga  
gaggagcagatagttcgtcctgttctttctagggcactgtaaggacacggaaagttggataagatgtttggatcattctactgggaaaaag  
cagaccgttgcataaatatggctctcctggcattgttcttctaatgatcagtggttccgtatgattgaaaaatctgttcgatcttggaa  
caatgctagaagaactcaagagattcttaaggaaaaatcctgtcgttcgatcatgtaaaacaagaatgaagagcttggcagctgcaag

cattttatgtctgtgatttcagagtggcattctcttatgctccacaacagctatcttaccacgaaaagcatcccaggttagaaggcttaatgc  
aaaaattgaggtttgagaattcattcttgatgagactggcctcctgacatgaatggtcaagcatctaataatggacctaacgattagga  
aaaggggtgtgttttccattatggatgcctttggaatgacaaccttgatcaagtaacattagagattgatcggcttctaaagcgtgga  
tcgagctcataaagcattaaaaactgcttaacatggctatgacctagcaaaccaataagggactacatcctgtacatattgataccatacaggt  
gacttcaaggcagtgtagtaataatattattcattttacgtattaccggtgtttactatacaatgaattcttttacaaggatctgttact  
aaaggtgtgtttatattatggatcaatcttagtcctgatagtaatacaaaaaaaggcaatactgtacaatattttttacatatcct  
ttgtctacgtatcagttatgtatcatttctttgttctttaaagtcgataccctttatattaaccatttactgatatagcaattaccaaaaccac  
attctaaactaataagaatcagccgaggttgaaagaataggtgaagtgaatctgtgtaacaatttcatctctgacccatgcaaatc  
aaagccacgcttaccattgacagtcgttgattataggatacagatacagatttttcttctagttcattcaaaaaataattatagacgaagaata  
ccttagaaacataatctaaaggtgaaagaagagaagtcactggcctcaacgtattgtggtactgtcaacctgaaactggaaatcaagcagcttc  
tttacaaggaattgaccggcttctgttctatcgtccactgtatctgtgtgagaaagttattgtaccgttattctttacgtatgagaccattgc  
ttgtttcactttgatctggtctttcattgaagctttctgcaatcattcccctttgtgcaaatcaagcttggtataaatattatctagggactga  
aacatattgaaattcgttttttaattgcccaatatccctttgttacagggcttacctaaaagttcttttctatacaatgttgatttttgcg  
aaaggaccagttttggacccttaacaaactataaatgataatacttctcaagagagattcgacaagtaactcattctggttcttttagcatt  
tacaattttattgctactgtactattaactctttatatttcaagaacaactttaagtagtttattcccctaggttgaagtagcgaagcgtgat  
accagcattccgctatgaaaaaacactcttgggtggattgagcctcttggaaactgaagtagcgaagattgtctttatgatattggcgggatg  
ccaccattttctattgtttccgattttgtagggtttgtttgtatcttgactttctttgtgtgtcattctgataccaataaatgttattgctacgaa  
taaagcaggtagcaagtcgagcgcgacaaatgcgtacgcgaagttatccttcagaatgtctcaggacaatggacaattgcacacattgtagttt  
gtactttgtgaacagcgtgtgtttttatttttagtactatcgatcataaccgtattcagcaacgctattacaggagtgctgactatcaga  
ataatattagtagcgtatcttgggtggctgacatcccttctacgcttctttaaaggttagcagcattgtctcattgaaaaagagtg  
acagaccaatttattatcacatagtcatgcatcaataatcttctagtcctgtaaaaaatacaacaatgctttatgcaattgaagcaggttt  
gcaaagtaactcaagaatcctaaacagttgccgaagtagcctcaatcacaagtaaacatggtttattcaattacgaaaagattgatgccatc  
gattattacagcgaagattgaaaactatgcaactacgagtagcaatcgcctcgagaatcacttgaggaaaataaatatgagcaaatggatttt  
aacctacaactcttctttacctctatcaaatggcaaacgcaattcaaggtcttggggcagcaatacatatgtcctcaaccagaggat  
gtgtgggataattatccctcctaggagcagcgtttcttcaatcgagttattgaaattgctttcattgctttactcgtagcctggattcccga  
aacgcctttttgctatctttattgcaaacctctggaatcttgtaatatgagccatggttctcacgtcagctcaatgtgattcaggattttgctg  
attgttcaaggtattatcagtcctgcttaactgcttttacttttgaggttctctgctgtaggatttcatcctccagggtagttgactaa  
aagttcgagagagaggggagtgctgaataagatgcagcttattttacgtttgataactttatcattatactgtactttctgtatttggaaaggtgt  
tgctcttatcatagctaaaacggaacaagaaggcaatttgcgagggattgacggtttaaagcgtccgaaccagttccttggttagtaagtc  
cttctgtgggtttctctgtttggattatgtatattgccactcaattacgtcttctgtttcaaatggcccaaccaatagcttaactattctgattat  
aaagaaaaagttctttcgcctactcctcgtgatatttcaaatggacttctctcaaaaattcattacagcagttctctcaaaaattactctttt  
ctttacgattgcaatctgttatgcatgtgttagctttgtgtctgttattgtctttgcatcattctgctcgaattacatggcccaaaaataactg  
atgtacatttctgaaactactgcagagagtgaggctgttttggcggccagtagtaaacagaattctcttggctctgagttggctaatgttattttg  
ttttgtgtgtgggctcgtggtggttactcagcattttgtttattccaaattttgcatttgtgatagtttcaaagttattgcaaatatgctta  
gacctaaagctcatttctgattgaggatccttattctctattgaggaatctctgatcacgtggaaagtgaatgtgctttggtcatcatcaac  
ctataccctattgttggtcctttgggtcagagaagacgctcgttcttactttatttagttactccggaagacagaagcagtcggcaaacacaat  
acgaagttctctgatgatgcttcaatgaaggattagcggcaatgaggacgcttggcagtggtgactatgttgatctgagcaacgttgaga  
ccgcaaggaacaattgagcagctcaatccaagatgtgaataagagtcctcttagatcttataagcatcacggccacaagcctcaatac  
atgaaccctatgatgacagaggaagattgacattagggcagctttaaacacatgcttctgactcaacagcattagaacctgtcatgacaacaag  
tacaatgacctccatgaacggcaatgattttgagaaaaatcaaaagttctaaattggagccgtctatctagcacttagttctgtatattgtt  
cttcttttcaagcaggtcggccttatcaactcatatattatattgtttctgtatctgcatacagattctcatttcatgtttatctatattttacatt  
ttttatctttatggtcatcaaacctttactatcgatttttgttactctttatatacctatggtgacctatgtcttttttttaaatgtttgtttct  
tatttatgattcctttgttcttcttattcttctgtgtttttacgtttctgtttacaaggttcttctgtatattgaatttatggtcagcgttgc  
ttctttatttagacaaagcgggagtgctgattgagaaccgacttctgtatattttttctcaattatagatttttagatagactcacgggtgatga  
aaaccgtctgtagcagctgaccttttagcatctttgtgcatttttctatagaatgacgaatgagaaaaattctgtcaggaaaaataaattttatt  
ataattgatatactgtaaaaatccggaagggacaaaattcaattactttttcttcaggcatccttcatcatgaaggcttttttacagagggt  
attctatcttactgttcttagaaacgacagagttgaactttcaaacagggcaatttaattgaacgtagaaagagcattcctgcattatgttta  
gtttatttagcaatcaaatagttgtgttagtgatcacaccagatgaattactacacataaaaagttcgtacttggtcatcatgtacgacctt

taaggaatggtttcaattttaaataaaaagaaaaagaaattctcaaatttgatgtttccaacttgaaaaaacttaactgtatattaacttaggagc  
atctatatcgtcttaaaaaacacttacgttaaaatttcgtaattatttgttaaaggcgtaacgagagtttcgctagctatgctgctatttgagagat  
catgacgtagagtattctcttaggatgcttattttcttatccagtgaacaacgaaacagaaaaaggctctgcctctcaccgttaccaaacacga  
agttgccagatcagatcaatccaagaatgtcagaagcctctggacagggagcagagctcttagctcctggttttgaactattccaagtatgtaa  
tagaaagggtttgtcatgctttgcaagtactaacaataattcatttagaagctctggatggatgaattgggtttctttgctcagcaaac  
gtgcttctgatgtgcaactaggattttgaaagactttcgtttactaactggcatttgaaaagggttcataaaaaatctggctactttgatgtga  
tccgactcttttagcattagtgttacttcatgggaagtacgattgatgagaagaaaaggcttttgagaactgaagtggcagaaaattgatattgc  
attgtcacaagataaattgtttttgcttcatctatgtgggtgcttattgtacctttttatactcttcgctcgttattcctgacgtagtagaacatt  
tgcttttgcttcttgagaacacatctgtattaacctgttagtactggagactgtccgctctttctgcgcttcttttttatcaggaactctttgc  
ttgaatacatgtcactactggtttgagtttcagaattatttgttcgatagtcgatcatgaaagtcctcaaacgacgctgcttgcctgctgaaatgg  
tatatggcaggactcagccgcaatacgcactctgaaacaagagtgtatgtctaaagggaagcaataaccagaggaagaaaaactcacagttgtt  
ttagtagggactgagaaaaagcccctcaatcccattttgggtgaattatattatggcacctgggactctagtaaaggcaagattgaattggttgc  
gacaagttcccacatgagccctgtttccgcccacatgctttgtaaagaagcaggtatttctgtgaccccacaatatgtataaaagtggtt  
ttctggtcgtaccgtgacgtgaaccagattggtcaaatcgcattcatttagaaaaattcaacgaaacgtattacttaacctcccattattct  
ttagaaggcctttggtatagctccttaccattgaattgtacggcagcacctatatcgtcagcactccaactacgtcacaagattgactctgg  
tcgtggatattttagtggaacgaaaaattcttcaaagcatctattatgaaaagaatgctaacccgactatgtgtggatggcattggacaggg  
actccaaggttaagcgacacaaaatctaagaccgcttcttcttagattatggtactatggatgctaccccgattactcctgaaccttttagta  
agtaggtgaatgggaaacacgtcatgtttgggtagcgtatcatctgctcgttaactgctatgacattgtcagattgaaaagctgccatt  
gagcaatctcagcgtgaaatcgtaaacgagagaaagaagggtgagaatggaaacgcagatactttgaatggcaacctgatgaaagctcg  
gccgtaattgttagctcattctgtgcaagaggtattgagcctgggtttgggtgtacgttggcgatacgaacctgagtgaaaccaggtgatc  
accctgtgagaaggactaatcttattttggttcatttactttttccatttttaagagtagcaagtttggtttaattttatttacagttctttc  
tcgtgactctaattagtgatgtaagatataaggaatgactgttttaagaaggactttaaggaatttctaatcacactactgctgaagcgtaatga  
tgccgattctttgagcagcacaataattctgaggtgaagtgaagaaaaataaagtagttccttctgctttttacgtcaacgtgttattatggtt  
tatttttaaacgattgttcgctataaattctttatgagatgaatcattcacttctacatagtaaaacagctatacagactcaggttaa  
ttatcatgtctgctatgctgtgaaactagcaatagaagcctcatagtcattttgttcgaaacatcgaatgaaagcatgcttcccacaacg  
tgaaaaactttacagatgcaatctttgaaagaatgtaacttttagaatgggtgtagcaaaaaataaaaaacgcacatgtaattgtatagca  
gagaagagaaaaattcaaatcaagtaagaggaacagatgcaattatagtagattttccatgactacagaaaaccgggattatttagaggagg  
gaattaagggttaggtcttttggagtaattgaaactacatgtaaaactctgcaagtaaggaaacgaaagagaaaaatcaaatagtaaaaa  
tacctttcagccaacgagcggacagtgctggagggttagcacctacactgatccaatacttgaagcgtgaacattaagttctatatcctttatt  
ctaggaattgtcttccgatcttctttttgggataggatcaaaggctcctatagttcaaggggttagccctggcgcttctcgttgcaag  
ttagtaaaagttaccaattgaaagcgtcaaaaagaaaaaaaagattaaatgttcagaaaaccacattgggtcagaaaacatcgcaaatatct  
tagctcaacataccaagcattacagacgacaatgtgataaaatgggcgattacgtacaccgtgacgagccaagcgtacagctacaacctat  
agctagttatattatcgaatacaagagctttcaaagaactaatttgggtgtagtgatggcagagagcaaatcttaatatgatagcgttaa  
gcaatattatcctaaaacgtaaaataaggacatggaacaaagtcaattataaactcaaatgagaaaaggaatataagtttagcgtgtaataa  
gtcgtaaataccagaaacaggttgggaagtaataataactggatacaaacctctcgattttattattaacgaggcttttctactgttc  
tcttctcgtaaagtaacaatacgtacagctcaaaaacagcattttggaagattcatcctgacttttctacacttgccttgattgaaacataaa  
gtcaagataatactctttaaagaaaatagataggaacgcaggaatattcacatccatcgtttcctaagacagcttctgaacgctgttctat  
aagtaaccttttgattccctaaaagggtcgtattttcttctccgttgcaatcgattgcttctacgcgtctgttcttctgcttctttggaag  
gaaaaggactcgattcaggattgccaatcatcttaggttccaagaggttattggggacattagaacggccatcttattaccatccgatctc  
aactgtgtaagattgttgaattactttcagcaaatcagtgaggatacacatcaagagaaagagcacttctaaagcttcttttgatgtt  
cacgcgtaattcagagggctgaacaaggactggctagtagtctcttttctgttattattgtatcatatttatgttttttagagaaaaacagctt  
ttacgagattcttaatttctgctcgtatccttatttccggtacaccagattcagagtcactggtatatctctttcattgttatataattgtccttctt  
tacgtttcctaaagtcaattttcttttcttttgggttttaatttttaaaagcattggttctctcatcttccatcatcttccaccaacttactctt  
tatacaattgctgatcttattatcttttctgctattcttcttctttagtttcttatacttctctataaagctctttattgttgtttctctg  
atgactccaacggctcctcccgtttgcccaccagaacacagacaacttcaacctctcaatcaaaagttcaaaaattatggcatcttccgta  
tcatgagagctcttccacctcactgatgaatcctaatcaaatcttctcaatctctatggaaccttacttccgggcatcattacaaccg  
cagaatggtcagccttcaaatcaaatatagcgggtttccttctcaaaagacagtagccttccacgggttctattagctctctcctc  
ttggacataaacgcgtgatgctcctccttaatggaacaaggccaacttctttagaaaaaggcaagttacagaaccataaataaacactcta

ccgtagtatccacttctactaaccctccaatctctgaacctaaatgtactactacgtatacttctccatttactcctcgtagaagtcttctacaaat  
catgcactcccttcaactggaccgccagaacaatattctgtcgtctaaaacgctgtgccgggttgaatacatttacaattcacctctattatctga  
aagctaccacaactcgcgtcctgggccatttcatgcttactgccccacataacagtgctccgcaccttctgcatctgcaaacttagcctggaa  
gaatcagatgttacttttccccaaacttccatgaatatggatctaggggatttttctcagcttctcgaatggatcaataccccggaaacgggtgg  
aaagcgagattatgtggatattactcttccacatctgttttctcagtgatcagcattttgctggatgacccccagatcgaacttatatgtcgtc  
ttgtcttagtacttctacttcaaaagtgaacagccatcagctctaaatgtgtctccttcgacatgtatgaggtgatgaatacaaggcttcttccac  
tatcggatgcatttgactcaaaatatacaatgatagagacaattttccctcgacctccactttgggaaaagtaaaagaagaagattacatta  
atgatttgataccgcgaacttcaaaaaggatcttcttctggttccgatggacctaatccagagaaaaaccaggaacttgggaatactcgcc  
cttccacttcaagtttagtgggaacgaatcaaaaatgaacatgtatcacctgttcaatctcgttatagagttgtcggtaaaccaataaaaaga  
attctcataatatagtagagaaaaaatacaggtctaatcttaatgacaaaattacagaattacgaatgcaatcccgtctctgcaaagcttatgct  
ctaaaattgggtcaaaatctgacgacggtaagaacgggtgcttaatgctccatcagaaagcttaacaaagctaccgtctctccaaagctact  
gagtatattcggaaactcgttctgaaaatgaaagattaattgaggaaaacaaaaccttcaagccggttctgtaataatggtagctgttcag  
caatcgtttctgctccttcaaccacttcttatacaatcaaccaattattcttcaacctggtcagtgatgctatttagtaccgatggacaa  
ccgattcagttcaaaataatcaatccttaccctcagtatcgtatgtgccagtaggtcatcagtccaaagtcccagtaacgttaccctggctgtaa  
ctctccacatcgagatacttgaatcgtatgataacaatgtatggtttcagcgtgataatccgaatactggaaccgagaattgcatttcaccg  
cgtaaccttaggaggaatacaatggcgcatacacaagactaataatgagctcaataataatggtactttctgctgggtgtagaaatggtgggc  
agcttagctggcttagaaacaatgcatttaataataatccggaaaacacaggcaatccaaactcttcttatttaccgataccatttctccctc  
aatgtttatgactttaaggatttctcaatcacgtcggcatgtatggttctgatttgcattacgcatatacttccaaagtaattctcgtaaacggta  
actgctgcctacaggcatgtaagaatggaaatctatttttagcttctgttcttcatctgttctgactggtgaggtattataaactacga  
aaagagatgttgaagctggtatctggagctgggttctcaaaaatcacacatcagtgactcaaggttgaatacttaactatttaaaagctc  
gaactttactttgctttagttatttattgctcagcttcaaaaatggtttaaaccatgattactctagaatgaaccgagcatcgttgaataagg  
ctttgatggtcattgcgtttagtataactattcttctcgaatgttcttattatgcttaagtgcatttgcaggttctcagctatcttagtgt  
tagcttctagcatcagtttgaacggctattatttctcagtgatataattcattgttctcattgcgatgattagaagcttagatgttctacgctt  
gtcaagtttaagtttttttttttttttttttttttttttttttttttttttttttttttttttttttttttttttttttttttttttttt  
ggatattcaatttctagaggagaggtttcatataaccaagcagcataatgagctatcgtttattatctaaagcatttattcagaagaatgaata  
gaaatatacggtaaaagattatcgtctagtggtgcgacatagagcaatcactaccattttcaaacgcaactaggattgttcttcatgcttt  
ggtataactaataatgctactaaaaattcatgaaaccagacaaaattttattgtaagccgaacaaaaaaagtacttataatgtaaatgatcaca  
gttagtatgttcccaaggaggaaaaaccacactgagtgatggatattgttccaataagaactctatgcctcaacgtcttgaattcacgaacc  
acatgatctgctcgttgcagcttctcgttaataaaaaatccaacgcttcaaggttttcaatgaggccatcagcccgtgtagcaaatcttgccaa  
ccactttggagcaaacaggttaaggaattaacataggggtgaggtaggctgtcaatcaccaagtacaaaaatttaagattggaattgtagggg  
tatggtgaaactggagacaaaaggatctggtgcacatgataaagtcaaaactggtttcaactcaattctgttcttaccagatccgtattctatc  
caaatgacactgaattttggcagtttaaggaactgctttggcgcgatacttctaggcgttttagttcttctcaacttttcttgaatccaagtt  
ctgcttgttaccactgtacagaattagaattgttgcgtagagttagctgacattgcaatgcttcaaatgatatttttaaaagtatttcgaccg  
gttttttccacttcaaatttccagtttagagaagtagagaaagagacagatactgctaatcacctagcatgaacaaacggaaaatacgaaaaa  
ataaagaaaaagaaaagagaaggcattttttgtaaaaataataaacaacgaagaactcctgtttcgtgtggtgcaattttgcaaga  
aggtaggcgcatatcgtctcaattaaatttagagaaaagcttatttttaaaccttagttagcattgtttccaagaatgccttgataacga  
tgaaatgccattatgtgtaataaaatgaaatttaaacatcagttttccagttttatagcatttcataggatccttgaatctgacatgcttccggtat  
tagaagacgtacctaactcttcttttgggtcgaatctgaatctgcaaagcttgcgtgggctctgttgggtccatttccatagatacaagcgttagga  
ctctgttgcggtatgggtaaggttcttgaacttttctgatttttttcttcttctcattgtttccgaaaaagacgctctggagcccagactct  
gacataggatctgttccggcagatataatgaacggacctaacgaagcagctgcaacagggaaacatttggcgcacatctgaatgctgaatcgaa  
tcatctactacagctttgtactgggatccgtaatgtaaacacggccgttctcacttgggtaagaagataaacgcttccataagctgatatacgg  
tctccacagaacgctttagataattttggttccaaggaaagtacctggataggtaatagcccaggacatagaaaaatgagtttttaggc  
agtcatataaatgaacaacacgattgttgcgataatcccaaaggcgcatttgtgagttcagattactgacaattaggtattgtcgttccgactaa  
atttatatttataagggcacgtaattggttccacaagtgtttgaggcattggcgcctacatacgtcccagattcagccatgccatcatagcta  
gctgacgcacaaagatttccatccaagaatcgacacagatgtaatgggctcagaatgtgcaggtaacatacggatacatcttccatctgtac  
gctccaaatcgttacagtttcatccaagagccggaaccaaataatgtaccatcggattgaagtgcagacagaagatacgaactggtgtgcctt  
gtaagcagcagcgttagagcgttttcaatatcccagatcgcactgtttatcatctgatgactagcaaggaacctgctccacttggccacct  
tattcagatagcctctgctatgaccaaaacaatgtacattctaactcgaaaagtcaaagtactccaaagcttattgttgcacagcagatgcagtt



gcatccatcgtctatctggagatactgctatgcttgaactcttctgtatggccagctagagtacgtattcggtaaaaccgttattcgattggca  
ttcttttttcttgaatgtaaatgcatccgaatctacccatcctcgtaatgtcaacgtctcatccttgggatataatccaactccatattgt  
ttgtagagagacctataatgttctttagcttcttctgattcgactgtttcaactaaattaagttaagaaagaaataataggaagagagtcc  
cggcgctgtgacaagtaaaataaataaacttttagcgggaagctattcaaaacaaatgaatcataagctcaaaacaaccaatctaccgaagga  
ttaagaatattcatgaaatcaaaaacacagagtattgagtttcaagttgaatgagagaaggctaaatagttggctccactaacgat  
acgagcaaatccaaaaggccaatcctgctttataacaacttttagtaaagattgaggagcgttcttttacatgaatgtaagaaagttgaa  
atgtgacattcctgtcctacaggtcatttaactagagattttttacctgattgatcaataatggtgaactattagactttcatgcaagtctat  
ttctacctgattagaatatggacggctaaaaatgaaaggaatatttccctactgctattttgatgagatccgagcaacaatacacaacatcgg  
aatacaagcctgtgatcactaagtatttttccctaaagttatgaagcagattcagatgtatacataggcctaacagagtttgcttgcckaaaat  
ccgtttcacgatgaagaatatatgacagaaaaacaacccaaggaagtgagagcttccagatccgattcacacaacctcattagtaactg  
aacgaaatcttgaaacttgaattgagaatggcgttaagtcttaaatttacctctgttctctgtggatttattatggagattgtaaggtggtt  
caacaactgacagaaatcttttctagtgtatgaactactctttacctctcattggattccatcaaactcgcttttataatggcagtaag  
atgacttgacaaaacttttgtaataaagagacttccctaatgtctgaaacgaaaacagctgagtaatttccggctcagaggatgccctc  
tacaatgatgaaagagaacaaggctgaaatgtgacgctttagcagcatgatccctaaacaagattgatataatgctaatattggactgga  
aattaaagaatcatgcatacaatataaagtagaagaagagacgcgccaactgtatggattatacagccttttgagaatacagaccagc  
catacttctggacagctgtcttttctgtttatgctttttagcatattcgctgaaaaatgaagaatcttgcgacaactgacctagaaaac  
ggaagatattcctcgttattcctgttctattaagcatatgaagtaaagatcagttttgatggtgctcgggctgacttttataacttctgtgggca  
aaactgtgagacagatgtcaatgcataagtcggttggctatagtagttatctgttgagccactattatgagttcactacttttatgggaatta  
ggaatctttattctctctgtttgttttcaacactgtggaacagaggtctattgcattatgtagaagcctgtctcagatttctcagattcca  
cacttggcaccttctttcaatcagctatttctgattctgctataaagatcatttcttctataagatttggctcttctcatctgctacatg  
aatagttattactatggcaacttttttacctggtttgtcctacttttataaaggatcgtgcaacagaatcataaacgaattagcaatc  
attatctactgtatcaggtttaccataatgctctacctactatttctctcccatactcgtcaaggtaaggacactgtcaacaagaacca  
acaaagaaaagtgtgtgacaaacacaaaacacacaaaatgagtgattgtagacagctgaaattcttgaatattgtaacagcttctag  
tacgattcctggattgtaaaagccattcgtccttttaccggagattgctgctctgaacgaaagtagtactgctgaggattcatgctcctg  
ctatattcttgaatcgataattaacaggattaggctccttttaagcagaaaatgcttggacaggtttacgctgctgatcttttggatgctc  
aagttcctttaggcacgttctctgataacctagatccattatgtaggtgcatgggaaagtagatagcagaggtacccttttagatg  
gctgcatgattttggctgcaaatcgagggtagtgataatcagtttcaaaaaagactctacaaaaagaaaaacaaaacaaaagaag  
atggctagatgagaaaagtaacgcttttattgaattcggtttttaacacatgtttagtactcttaggaaatgggtagctctctcatgcttact  
tctagcatgtaatccagcttctcgtcgggttctcagtttaattgaagtaaatggaattgaaatccgatcgagaaatgtacaaatctcaaaaat  
gtaagacaaaatgaagtagatcggcaaacgtctttagcagatttttttccgaaaatgaaaaacgaaatgctgtaggaattctga  
ctttctcaatcttgggttctttatcaaagcaaacgagagctttggcaattatcatcgcttggctcaagctaccgcttatttgaactggaat  
gtatggctgacacatcaatgttggcgtggtatgtcttctttgattctcactcgcgccgctagttagttgtctactttggacagactctt  
caaaagggtttaggactgctgctgctctctttagctaccatcaactgcgagagcatctttggaagccttctcgcaactacgatca  
tattgcaacggaggtcaattgaaggtgctgtaatcaatgtttgattatgcatgctcaaggggataacaagctgtctgctttagtcaatcctttt  
cgactgcttagtagcagcatattcaattacccaatcttggcaacttttctactctttagctctttaggattgttattacttgaagattttc  
cgtgaaatcctattcgtcctcaaaaatccgtgggttctcagactttccaatacaagctttgtacactccaacactcccattatgctgagct  
gcattaactcgaatctattttggcagccgctttgtcaaccgctttctgataactttgatccgctcctgggtggttggaacaaaatgctgt  
ctctggcttcttctactatctctcccacctctctttccaagatgctctattgatcccattcatacttggttacgttatttacatgtcggctgt  
gctgtctttcaagcttggatagaagttctggctcctgctgtgattgctaagcaattaaagagccaacaattggtaatggcggataccg  
tgaaggaagtagtacaagaattgaagcgtctcattcccactgctgttcttccggctgctggttggctcctggcctcacttctgactcgt  
tggtgctttgggctcagccactgctgtctctctgactactaccattatggctattatgaacagttacaaaaggaattaaaggcagacttat  
ggttacctgctccttaggtcaataactatttctactgcatgataactataattgttacgatggagttgacataaaagtacgtttcag  
aatctggttactggaatccaaaattatgattcctaatttaggtcattatagaacatgctgctgaaatctagaactcctttccatcatattaa  
aaagtaatcaaaaatattatgatatctagtttatgtagtaaaagcaatacacaagcttcaaaaatctttgaaacttttctatggtagaca  
gatataatcattctattacttttaacaatcgtcaccacgtctcctcatgactaaatgattgagaccaaccaattgaggactatgtttgca  
gagctcccaacaaaagcatatttaggttctcggcgaagcttctgtgaattcgggtgcaaacctcgtttatattgagccttaccgaacaatca  
atgcttactgaagtcaggagcttcccttccgtttgtgataaactctgtaaagattgagttctccaaaatcttgcctcagaaaactaaattca  
gattcaagttacagctaatcaacagacttgggcaaacgggctagctatcaaccttccaaaagagacagcatcaatctgtctatagcaatag

agacaattacgtacctccggtccccatcactacatcaataaagtcatcgacagttatatcttcacgaatcaggatcccggttgaagctgt  
attcatgaagaatgttgaagccattttatagtcctatgggtcaaaggaacgggtatgattaatttgacgccaccgtcttttaaaattaatggta  
acgtcgggtctcttttggtagtcgaacaccaacctgctcaagttcgtactcgattttttcacgttggctgcagctttcgtggcatccaaaaccaca  
agaatcaagtcagctgttctgcccagagactgctggcgaccacctctcttgagaagctcctcaatgataccaggaagatctagcatttga  
atttcagcgcctcatattctaaaacaccggggatggccttaacgtcgtaaactcataattggcagtagcagatctggcttttgaattgcagaa  
agaagagtggatttaccacccaaggaatccaataaaagcaactctagcatcgccgtttttgcaacgtcaaatcttcaccttttggctcgtgtt  
ttgaggtaggctcaagtaactgagtagcaagcttgcagttttcccttttagctaaaaataaaaatttggtaagttccatatacattaaaatcgat  
cctttacttacaagtccaagtgatattcagtcgactgtttttttagtccggcgatttccgctcaatttctgaatctaaacggatttttgaat  
aactaaaataatctttcttaccttttctgcaacacccttttctatataatggttgtctttgcttaaaagcagctttttcaaaaatttggtagggg  
ttatgttgggaaaaacaacagaagaggtaccagaatccatacaciaaactgtatgtgtaaaagaaaaataatgaatgtgattttattgatttaa  
aagaaaatttaatttctaactctaccgtatacactcttagttatgtagtaagaaatgcttctatgccaataatgttgggcaaaatagataaa  
aaactaagtaataattctacagattttgaataggtttgtatctaagttacctgttatgctgttttgaaccgcattctcattgaaagtacaagtc  
aaaaataggattgttgcatacaagaaaggcaagatgataaattgttaaaaaattatattagctttcaaaaacagaatagttatatacgtaa  
gtcggagggtcacaattattgttcataaccggtaatcatcaaaaacaatatcataaaagtaacaagtcacgtcatcaaatgggacaatatttaca  
caagccctctctttgcttctttcttaaacgactcctggctttttctgagcgtctttcagagattttgttctgctgtaaacctctagcttaggta  
aacctttgggttgcattcctgatcataaggatgaatttccgttaagtaaaatttggttatctcgtgaagagggaactcgtacaagagttttgca  
ctgttctctcttttgcggcgatctgtcgtttggctgcctcacggtttttggataagaagccatggatggaatcgaagactctctatctcgtttg  
actgtactgaggctcctcctgaggatgacactggcattggggctgggggtttagttgcatgcaatagcctttgtcgaactttggaggctgcggat  
acaggagtagatgaaattggaccagcaccttctcaaaaataaagaaactatcgttagattgcttctcttctgctgaatgggacagcatttccgctg  
ccaatgagacatgtccaatggattagagaagctcattgggaaatttagaggtccttggaaatgttctgggaggctgaacgaaaaagacta  
tttctcaggggaaatttgaacccttggcaattggatgattgtcttctcacttctggagataactcattctgagggttcgcagacactactccttga  
gttttggcatacagaaaagtcgaacattctcagcttcaataattgcaacctcttttcaaaaatgaaatttctcctgccttccgtcataatagcgt  
ctaccgctccctaatttttcaattcttcttcaaatcagatgtgctgtttcaagcaaatcaacttttcttcaataacttctctgatgaagacaa  
aggattatcaaaattatgggtgtagtcggctcatcaggtacttctgctgagttactaggtgcgatgatcaacaaggacatcatgatgatattt  
tcattttcgattgttattactacatcccgaacaacctttatcagcttgaccattccatgttttctgcttggatctgacggttctggtaatggc  
cgttcttctctataggaagtggtagagcttctcagttctgactcaaacctttggatgtcttgcaccaagcaaacggtcaatgcgatttctct  
cctgtacgatgcttaaatggaagattcttatttcttctgttgcatttttatttcttcttcttctcagctgagctacttgacttaattatagc  
caagttgcttggatgacggctgggagaaatactgtcatcaaatcgaactcaagatcattgccaatcattccttcttactattttctcat  
tcttctgctgaacccttgcgctgactctcagattcagttggctctccaagatgatctgtgaaattcaccgtcttcttatttgaactcccagg  
tgtcttcaaaatgccatttgcgtattcttggcttagttgggtgagcgcacatagccttaaaccttctcaggaatctgtgttctcactctca  
ggattcacgtcttcaacgtaaacattgttttgggattcaatgtcgggtttgatactgtccagcaagcttctagaaaatgccttccataccacgc  
atacgtgggtgggtgattttaaagatctaagcaattctggttaatatctgccatttgtttacatggatgttttagctccttacctgacatagcgtctca  
cattcagccagaacgaacctataaaagaatgacttatgaaaataaataaataagcaaaaaaccttcttttcaaaaattctcagattctga  
ctcttttctgctgttgttattggattgttaccgactactgtgcatttctgaaactttagaataataatacttgattgttattatgtcttatcctaa  
tgtaatgctgtggatttttttctgcaacaggaaggaataactatcctttttaaagaacttttcatcagcatcagcatgagcatagttgatata  
acgttttactactgggttaaaaactctagactcacttttcttctcctcatatggaatcaacaaaaccaacttcttaaaagtattaaacatcta  
cataatttcaacatttactcaatttctatgcataaaatattatcataaagtacaactcaatttagacataaaagatcaacaacaagtgagtc  
tattaagtccattagtagtaacttgcataattcgtattatataggaaacgaaagcttaagaattagtccttaaaatctttgatgataaaaaaaaa  
gagaaacagatagtgaaataaatttcaatggcaatgaccatttctatagtcagaaaaactcaagatacctgacaggttatgaaattcag  
gattatcatgtttgcaagcaagagaatcaaggattcacttttctcctatcgatattatcttaggagaaacgaataactaatgctgttcttgggt  
caatcctaaaaaaagaaaaataatcagataccggtaaacatgaatcaagactggtagtccattctcctatagcatagggaaaaacaagggggc  
taaaaggatcccaaaagaggaataaaaacgacttctagcctcctcaaaacctttgtcctcaggaagaaatgaaattgttctgaagaaaa  
agggagaattactcaagcaaaaagggtgtgaaaggcgtggcaaaaacggcaaaatttcaacgaaaaaaaaaaaaatattctttaaata  
aatctatactgactatacgcattctgcacgtcaccctcttaaaataatgcatcaaacagcagcagcatgcaagaccggccaatctatcaaa  
gttaattcataattctcaattaattgcaaacagctattagtaaccaagctcaggctcactcttattacgatgcttctaatcgcagcaaggag  
ctcaagaaatgagcataaggttggctgacaatcagccgattttgcaaaattcattgctttttataatattacttacaaccacagcactgtca  
ccaccacctgttttgggggttggtaacatacatgggttctgttggagataaccctgaccacctgaggatagcctgggtagttttgtgag  
ggggataaccgcataggcttgttggggaggagcaggaccctaaagaacacatgggttagctttgctacatgaacatacaggtacgcattttt

ttaccacggaggtgcctcaagtacttacaaaacccttatcgccgtagaattgctgagcagacatgttttaaccaataaataaaaaattgaaaag  
ttaagtgatggtaggaagtttaggttacggaccggcgagttaagaaagcttctaagctgcgggaaacgcatagacttgacaacatacacaatt  
aagaatTTTTtagaagaagaaaaattgtataaTTTTtagtgatTTTTgtagaagacggctttataaaaaaggctattggctcgcttac  
aagcattgctgtaataccttcggtggcttctattcgaaaaagaagtaaaatgatatacgtaatgttcttattcataagatgatactgaaagga  
aatgcattgtgtgtTTTTgaaggtataaaggttatggaatgcaagaacaaaagaatataataactgggttacttgctctttattgtgggtTTTT  
tttaccattcttattctaaacaaaatagataggctgctacaaagatctttacaaagaacctatccattacacacctaaggattttcaacaagaa  
atgcgtaaaagtatagtttgcttcaacatggattgagtcggtctgtaaattgattgactttttattgcttcataaaacgcagacttaacgattgcacg  
aaatattgaaattatcgggcacagcgtgtaaagatagaacaaaaggttaggacgcgcaaatgtgtcgaatgaacgtttcactattTTTTa  
cattctTTTTgtttgttcaactctttcggtcaatgtcgcgaacgtaacgccgggacgcgacgcgtcataaaacacgcgacgaggttttg  
tgacacggacgcgacgcatataaaagaagccaagtttaattatgctgtctattgtttaaattataaTTTTgtctaggtaatgcgctggtg  
ttcgaacaaacattaccgttttctgtagaaaaactcgctcttcttcaaaacgaaagctttcgaagcaactgactcagacgaatgcaaggt  
gaaatgctcccaagtgccttctgccttaaaaaagaacaaattctcaggatactccgaattctcgcattctgcccattataccttcaacgg  
atcctgtgtcagcaaaagcatcattagaatTTTTctgctcttagacattgttggaaTTTcatatttccattaatacaagccaacattccacct  
tttacaacaaaaggtttctgctacaaaatctcattcactgtctacttgcgcaaatccttacaattggctcgatgcatatcgattacggcc  
atgatttgcacaccagggtcgtcgaattgctacttatgagctccagctctcatcctcaaaaacctccgatgcaacctctctcggttacaggaa  
tttcatgaccgtctgtaaagtaacctcagactcacctcaaatcaagagattcccggtctatcttctcctttgctaatttaaattcgctgat  
cctaaacaccgtcttaactgacttgccttataaaaaagctgcatctcccacgaagaaaactgcgggttgcaatccgaagagaaaggtga  
atacaacctgatgattcagagcaaaaccctcttctttgagaagcaattagaatcatctgttactcccgttgcttcaaatcctcgataaaatta  
aaaagtcatagatcatctggtgccgctccgaagaaagaaaactcggcgagttTTTTcgcgagcttctacttttgatcgtgttcgaagaagc  
aacaggttcagaagtaagaaagttgagtaagtaaaaaaggacctgtctcaciaaagctggtatctgagaagtttcattggctccgagctgtt  
gacctattttgttcagcttgcactggccttcaaaacgttctttctatgacggaattggctccagtttcaaaagcttcttctataatgt  
cttctaaggaatgattgacatggttcaattgcttcttctactctccctcatggtgttctatccacaatttaggaatgttcaggtggtcactttgt  
aaaacggttaaggaagccttaccctcgtctcaagttcttctgaattaaaccagcaaatcatgaataactcactatccccatccatatta  
atgtctgaataatgacctggtgaatacataattcggattcttgggtcgttaagctgctggcagcttggcagcttccggtttgtatttcttctttt  
atTTTTgtctttacaatcacgatttttaagatttctactttaaattgttttgacttctgatatgtttaaaggagcttttggttgaattatagtt  
taataaatattcactaaatttattgtatcacaacccaaattctattattgaagaacctattacttattaaacattgaaaatcatatcaggga  
gcggtttacacatgctattaccaaaaggaatgaaatccggttaccaaaaaaattgcctatgtccaaaccatacaaaaatatacaacctttt  
cgtatattaatggctaatgaacaaacagcgtagcaacttctttatgctgaaagcatatgtaacatgccaaccagttcattggcttttgagaaa  
tgacgacttctgctcaaccttctacgaaacttgaatagcatttcaacatgacactaccgcccgaagcaattccatataatgtccaaaacggt  
attggcaactattgtaagacatctgtaaagcgggatcttggatataTTTTcgaaaaattcaaaagaggacttagagaaagatcatcgcggt  
agaaaagcgtatacgaaccaccacatgcaataattctattaacatgggtgatcactaaaattggagatccgtttttagagacgaatctaaag  
catcccatagttgaaagtctcaaagctttatcgaaggacgaagcttttacggcgaacttctcaacgtaaaattcgtcatttccactttgtaa  
acgtctttttacgtgaaacaccaaaggcactaccgacacctaaaaggaaaggcgtctttgtgtaggttgccttaccacggcgagctcct  
gggacaaagcaccattggctacacacgacgaggttccgatcatcaggagaaagacctaaggacaagataggagcagagtattgataccat  
gcacaacctcaatcagcaactcgtaaactttaaactggccatccaaaccaccacttaagagacgagtggtgtcgaatttgcgccaagcatg  
taacactctttgatggttggcaactcttagcagcgttattaccagctaccagatcccaaaccttaacataaggtccaccagcagaaactat  
agtactccagactgcagaggtaaaatagcatctaccgagctcctatgataaattgacattactcaggttgcgcaaacgtgtatcccacaatcg  
gacagtgcctacataaccagaacttaccagtcgagtagcacttagccactcggcagcagctacgtaatcctcatgtcctgaaaggtcgtgatggg  
cttctcctgtagccaaatcccaaaccttgacggtcttctgctcggatcctgaaaggaaactagtttgaataaggacagaatttagtaacctgcac  
aggaaattgatgcaaatgaagcttctaaatactgcgagtcgataaaatacaaaatcaaaagattaagtttagctggtcttcttcttaagaac  
atctaaagaacaattaaagaacattataggctttaaattctctctcttttcatagaaaaaaagctttcatcaacttgataataacggtc  
tatattttattctgtcaagcaggtataaagcttctgcagtatacagattcagaacacgcctttaaagccttttaattggatgtgaaaacatacc  
tgaacaagggcgtgcatcacctgctatgagtagtttccatccttctgaatattaccagaatgcaatatcctgaaatcgggcaattgtttctt  
cacggaacgagagctagctcgtatattgaaacagctgaccgctagtgacagcaaaatcatgtggcgattcagcagaaaaatgaatgttgctaa  
cggcactatattcctttgctacgacaggaactttaaaggatcgcaaaaattttttagctgtgattgggttggcagcgcagaaaccgctcgg  
ttgaagcctccagaaggtgcagacatcgaattgtcgaatgtatcgtttcaggaagttgttcgaggtggttggctaaaggcgagcac  
gaaaggtgaacctcagaagacattgaggttacgttcccttccatttttaataaaagatttgaatttatTTTTaaaaattttaaaccttctttgct  
ggaatgcatagaattcgttaaaattcaaacgtacagacaagaacctatttctgaatcttttgagttgctaaaccatacaaaaaatgtttaaagt

gcaactgaaactcctctgaacagtgttgaagtttcttgaatgggcacgtactgttcttcaacgactctgtggatataggagcgttgatcttcaat  
cgactgtaaagtgatatcgaaaaattatacagagcttcgatagagttatgaaaagatagaattatctttaggagttcatgaagctggggaaggaa  
ggaatcttcagtcgcatctggcactaccagcaaacctttatgggtgatactggtcacataatgggatgagcttcaatatacgtatccagtggt  
gcatttggtttaacattgcctcttttagttttccagctgattcaataaacctgtatgaaaattagtaacctgagcttggagttccaagcttacctca  
aaagtatatagattgaagctgacagataaaatggatcatttcggccaagtgaatactgacaaaatgccattctggttgacaaaattctagttcac  
gaataatgttgcggactcctagagtcgaccgacccaagaatgagaaagaacaaactcaattcttttaacctcatagaaaattaaacatcttc  
aaactgacctgagcagtaaggtgtgataataacgtaaatcgggagaatccacctgtactccaacgtaagacatcccaacctacttcacatgg  
gataattctagtagccttgcatctaagcgttttagaataatattctgggtcataagaagcattacttgagcgaattgcgctcttaagcacggttaa  
attgtgtctgaaaagagtggtggcaggttctaaagaatcacctaaactttcattaaatgcaacaaaatcaccttgaccaatagaatata  
ctttttatggcattcaaatgctcactcaaatggaattttcttccatgagtttaacgagatgtcgagtgactgtgtataagccatgtcaatagtc  
attttagacttgggaatctgtatagaaagctttttgcaaatcttatagtggtctgagtcattccgaatcatcaaacatagcgggcaaaa  
ttgaggcacttccgataagaatatttttctactaaaggactcgacaggaagcttggattaattcttttccaagtgatatttcccttccaaca  
attcgtcctgttccctgtctatcatgagatgagaaatcatcagttcattgacgaaaaatcccgaaaaggatctaccagctctctttataaac  
ccaatttgcaatcatctcatgaaggggtgagtgatttccatcaacactcgttgaagatcgtgaataataggggtccatggaaactatattga  
gcaacaatagaataagcttcttctgttctttcttcaaaaacgaattcacaatggacgatagatcctaaactttagctggaattattgtccag  
actatacagcggcgaatgtaactgttgaactcgttgaattatccgttcgaagttgagattctaaagaagcgataaggcttaggtattgtgtca  
attctttagaataaatgctcggaaacttgaatgtaagttgttcatatagaagaatcggacatctcaagttgagtgtaactatgaaa  
accatcatagtcagcgaatttttcaattcttggtaaagaagaccaatctcacaataagaacggattgtaggatagatgggagggtattgtgtg  
gataagtcggcattaccatcatgaaactcacaaggtcagttgaaatgccttgaagaataaacagtcagcacttttcaataatcttctgtatcgt  
tactttctcaaaaatgaagcttttctttagtaggttggctgcttttgcgagagggatgtccactcgtatataagaattcgtcagagatagatc  
tgtttttatctgttcttccatctgtacttccagacaaggtatgtcagcccaagggggtaaagcttgcaaatctgaaagagcatttgttggat  
gagaagaagacagctcatccacgcttgccttaattctgataagctatataacactttaggatactagcttgtttttagtagcctttagtccgt  
aaacgagatactagattagagagtcgactgaataaaatccatcagcattatcattgaaactaaactcacgtaataatgtctctgttgacagt  
gtctttagccttgaaaaatgcatgataatatttctcaattccatatactggatgaatcagatgggattctaaattaagtcagctttcgtatatact  
acgatgatgaacttacgaattaatgattccttcaagaatccgataattgttcaactgtatagcctcgtacgggctcagaaattctgtaaatatt  
tatcggcgagacgcgacaacgcagctcgaatgtgaagttcagacataatgaagcaaaaagaacagagaaagtaaatatctataagtaattggc  
atgaaaaagcgaagcctcaaaaactaaattggaagcaattaagccattaagctagctatagctcctcgtggaatagtagagttacaatgatgg  
taaacacaaaactttacgatagattactagtgaaacttaataaaaaatgcacaaacgcaagaaagaattatattaatacaaaactactcaa  
aatgaaggatgtcatgaaggagatgggcttctaatagcattggaatccatcatgaaactcaagttaacagcaatgactttctctgaagca  
attggagacttctgtgtcgggactctgtcattttgtgaggaactttgatttccctacaaaaaagtcgacgataacttcttcaagctcgtct  
cttttctttctttttgttattcggagaagaacacttggatagagttcttctgaactgttcaagacgtttcgaaaaagttcctgggaaagca  
attgtctagttgaatacgtactagaggaggattccaaaccagttctctagaggactaaaaggttagaacgttatcggtaattattctatactta  
cggttcaagtcgataggtatattgccctcaccgattggaatagatttagccttaggtttagtggtctatgatccgtacggcatgctcaattttaa  
ttatcgtcggcattggagtttctggaagactaaaacttggtagttataaccaagtccaaagtgatcttactttttatggaaggattgatgacg  
cctaacaagatctataaactagaagcacggtttgttttataaaatcaaaatcattgggactaaaggaagacataaaggatccaaaatt  
tcgagccggtcgcgacgaagcttcatcatttcaaatcataacgaggataccgagcaagcttaactttgttggcagaagcatataagtaatgaaa  
gtgaattatggaataaggcatatacttcataattcatgatgtcctccgatgttaattattaagtcgatcaaaaaagtagaccagctctgtgtta  
ttacaggttcgagaacaaattatccgtaaaaggcatctgtaagtaaatgtggaagcaatcattaatgtagcatctacatcattaccactttcaat  
catgttaagtaacgtgtctatgtgtgaataagatatttgtgatgcttatacttcaaggaacgcgcatcaggtcgtatgtagaaggacgataa  
aagaccagaattcggcagcaattagatttggctgtaaaacttaatacttctggttgatagatgatgactttaaaggacaagagctgcaagct  
gtttagacagcttccgatgtcgaattgaaatctgtcaataaagttaaaggagcagctgtctatggatagattttgagacctcaaatggaacgt  
aaacgacctacaaaagttgcttgggtggagcattaaaatagactacttgggcatagggctcgaaggccgtaatgcaggagatataagatcat  
tgcatatgcatataataggacgacaaagcttctttgttgcactttcttagatttagaggtagcttgtgcaaggctagcttttcatcgcttccag  
aagcgtcacaagagcagcaatgaaggcaggatcccaccgtcactcgtccgctactatacaagtaggctgggaagacaaggcagagtggtta  
cgagaccgacgcccgatctttcatgaaccgtatttgcgtacgatcgtcgtagcattaatttcgagaacctataaccagcttgacgggctatg  
acatgcccgaagttgtcttctgaaccagcctgacctgtcaaatcataatacgcctatcgggacgacccgattcttggctgaagccttggaa  
aaagcagctgacgtggtgatgctgaggcatgaggagagatgaccaatacaaacggatccaagcttcatccaacgcatagcatctcgat  
gaactcttcatccccgattaaatcacgaaatagttgaggacgatactgtctaccacatttctcagtagcaccaggttttgaagcaggaga

agcggatgtgctgttgcacggccctgaagaaagcaaatcggccttactttgggctgtagctgaaaatcttagcccaagactggacatttcg  
aagtaaagatctttaaagaaaggggttttagatagctcagcattatagtcagtagctgtggttaaagttccatatgacggttataacgtcg  
ggaaaatgaagtatagcaccagaagagctgcgagcagtaacagatccaaaagtctagaagaactggccgatggatgtcataagaattaggc  
agcggttgtccagattatgtaaagacttagcatcatgcaaatcctgggaaatggaaggaaagagaaaaggatgagaattagatcgactcgg  
actcttcttaaagaaaacgagggccttgcgtgtgaaaggtagggattgaatttttagagaatcaatgcttctgggaagcattgacat  
gagtgaatttctcatttggaaaatccaagttcattttggtaattcaggcctatctgttgcctaaagagagattgttttgggataaattgccttgg  
gatcgaccaggggagtgatccatcgctgacgggattcaactactcaagtcctttttctggatcttgcgactccaacctttaaagca  
tctggcacactcggtaatttgcgtatcttcatccatgctagaatccatgctggatgcccattgaagagctatacaaatccaaagtggaaggcaga  
tcaattccattcctgctggagatccaattggtgagagctatggaataattcatttggaaatattgcgatgcttaaatctcagagagttcgcgtt  
ctcatttccaaaggtactcttgccttctgaaattcatcctcaccgtcatttgaattttttctgttctacttctagtaattgttgc aaatcctcgtcg  
ttgggaataaagccatggacgcgtatacaccgtctggcttattacacttctataccttgaatatacaggaattctgtttagtaagtttgcg  
aaaataaataacatagttttgtgacgttaagtagccttacagcagcacgcaataactggatcttgaatgcgctgttttctatgcttcttcgca  
tattccatttgttgagtttttattgtgaagctaaatttgttgtatttgaattgcattgcgtaattttttacttactcgttgtgcggtatgaa  
aatcgtctaattggcttgcgtgtgaagactgaggttttctggacgtaagaaaagtttgggctcttttagcagcaaaaggattgcaaaaagttatct  
gtgtaaaaaaagtttggaaataattcgtgttcgacccgtgtgattgaaacggttggagagagtgaaatttactcgttgcactatagacag  
attggtgattgttcttccaatttgggattattcttctgttcttactttaaagcatacagatgccatgcttctcttcttcttcttagtactcgc  
gtgaccataatctttaaattttagaagcttcttgaagaacctattttagctacgtctcgtcgcgaaagatttagcgtttacatatctatg  
ttgacatggaatatttatttctaccgtgtatttttgggttctccttattcattgattgatctcatataaaattatgcctactgctgggttggta  
acaatgttgttgtttatgcttggactttatcggtcaagcattgcataccctcgcgctatgtccaacagacaaaagcattgcttattttaa  
attcactcgtgattacgctgtcccattttcaatttgaagcctttggaccaggggttctatctcgtgttgc aaacaagcgtttgacattcttg  
tcaatgaggctgggaggctttcggacggcttacctaaactccgaacaaagacgtcaaaaagagaaaaagaaatttgc aaatcatctcgtctc  
ccttagcatctgcatctaccgccccttcttccagtgacgcaaaaatcaaagatatttcaactcaatctcataataagagagagacactagca  
aacagcccacagtgaattcatcttctgaatactcatcaccaaaaagcctacctttcccaaacctattcttcagatggttcgaattctgattggc  
tcatctatctagctccctgcttttagagcagcagaggttctgttaagaaaacgggtatcttctgtttcgcattgctgacctaaaaatcttcatgc  
ttactatttgaatcttctcatctttagtttagtactggactgcatttttactggctctcctcgaatattcatalcattcgtttgtaattctcaatga  
gcatgattctattcttcttcttcttctcaggttaactcggacttctccttgcctttaaactccttaataacttaatagacctttcgaaggcattag  
catgcactggaattagaatgcttctccttggggtctcctcatccttttctcgttatatactttaaatacaagcttctgttgttgcgtttaaagt  
tctatttcatctacgctaccctactcgtagatattgcatggatgtagtagaataattcgtcggaaaagcaagtagacattgaaagcaacggatt  
gaaaaaatgcaaacactgcttctgttcttcaaaagcaacaggttatactttaaagcttcttcttcttcttcttcttcttcttcttcttctg  
ttcgtatacattgaattcgttcaagaagcaatgcgctgtgagttttatggaattagaataagaataatagtaactaaagctcgcagcg  
ttcttaagcccagggttatataccatttctgcatagcttcaaatgatgaaagcgttacgggtgttggtaaaagacagactgaaaattggat  
tatgtaaactaattgttctcaacgtttcttcttaacctgacgatcagttttgaaagcttgcagccgttagcaagtcacaaacctatac  
ctagagcctgcgactagaatttctctattcaagatgcttcttctttagaggacatgcacaggtatattggatgctttgaaaaattctaaactagt  
ttagtacctaaaaagatctagaaaaggcattagaacctatgaagtacagttgcaatctacacaaaagagatggttcctatttagggactat  
ggcctatttatacgaataaaatgctaattgatctatagttctgatgctgatccggcgtttatcagactatgctatggctctttacggcatg  
aatcttcagaggaggaattcgtcagttatgttactcgcagcttgaagacttctgaggcaagaacagttccttttgtgataaaatattgatgtt  
ttacgtgaacgatcctatctcgaagaagcccggaggtggcagctaatgtactagcaaatgaacaaccaagtagtcccctagctattctttcca  
ccgaaacaggttgcctctatttgaattatctgctcaactccgcagaatccgaatgattttcccaaccattcctctatgatccaatgcctct  
gtatcatccagctgcaatgtcgtgttccagattatgcccggagaatcctgggcttacaactcttctagtccagctggtatcccccttctcttct  
ttccccgcgacccatccatcttcatatctaaaaatgaaaaacaagaacggctcgtcctcaaggaatgatccttatggagcgggtcaagctgggtt  
tgggcccgaataaagggtgtcctgcttttcaatgggtcaacgaccagtagtaatactccaaacgatccaacgaatacgttttatatgtt  
cgtaatattcccgaagatattgatgaagagaaagtcagctcattctttccaaattcggcgtcctcgaagattgaactcaatcttgaacaa  
catgcagctattttgaccttcatccatgaggcagctcataatgcatggtcttcaccagaaccaatttttaacaatagatttataaaattttgg  
tataatcctaataaagcttccaaagccggccgcttccgtaaagatttttcaagcttcatcgcgatccagatcttga aaatcatgaggatg  
aagaggaccctctctgttattgcaaacgaagatttccataaggacattgcccgaagcaaaaactgcatgaagagcggatgaagcgtttaga  
agaaaataaaaaggcgttagaagagctgaatgaaagaaaacaacaattggccttgaacagcttgaacaacaaaggttacttatgagcaagat  
aaaggaggctgatccgaaaacaaaaaagtcacagctgttagaaactcagctagctgttttaaagccgaagctgaaagttgggcattcct  
gtagggagtgagggaagtgcagtcaggtcagtcactaatcatcatccttctcgtctgcaccttctcagcaggggtcttctcgttataggaaga

ggcagaggtggattctcattggcatctatgtccatagacaatcggcctacaagggtcaaagtaaaaaatctgacccccgagaagaatgaatcttt  
attacaattcgttttagtgcggcgaatatgaaagtattgatgggcttaactctgatgaacgattggtaatttccaaaacagaaaagcagcggga  
acgtgtaagtccgtttacaagatgaatcagcgaggcaacatctgctaacataaattctagttttatcatggagtcttacgattccttcttataaa  
gatgttcagtagaatgggtggcaagatgctactaaaactttgcagactcaggaagatgatggaagacggtaatcaatagggcaattaa  
gaaaatacaacagctacttgattgttattagaaaagtaaaaaatctcatttaatttgattttattgtgaaatctgtgaaattgaagaaggggggta  
ggtaattgtatttaaggtattattcagtgtagaaaagtcacggcataattgcttcaggtaggcattaatgcaaaaaaagattgagaataaga  
gtcattactgagacgggaaatgatggcttctgttattcgacgttcgaagatttaccaccaagtccttggtacgagattcagggtgttggcaag  
ggtatcaaaaatagctaaaggagtgttagattaaaccgcaatttatctatcgtaaacatacctgtttcaattctagcagcatgctcatacaagtt  
catatgtctcaacatcatgatggaggatagaagcaatgcagttggattggcaagaccctttccggcaatatcaggagcagttccatgaacagctt  
caaagatggaagcatccttaccatgttaccggagggtgtaatccaagaccacgatgagaccagcgcacaagtcaaaaacgatatacaccata  
caagttgggcataacatgacagtattattgtaaggaaacgggactgtaacaatgttcaagcaagcattatcaaggatttctcattcaattgata  
tcagggaattcgggagcaagttgcttgcgggtgccaanaataaccgctcagccatttctatgatggtagccttatggaccactgtaattgttcttt  
gccggttgacgagcatattgaaagcatagcgaacgacgcgctcagatgcagcgcgagtaataattgatagattgaacaacccccgggaca  
acctatgttcaataaccggaatactcaccttcgggtgtttcacgaatcaagactgtttgacattgtcataggggttttttagccgtcagtgagac  
acaaggacggacatttgcaaaaagtcgaaggttctacgaagagtaaggctcatagaacatgtcccttccgactggagtcgtaaaggtccc  
tttaaagcaaccttcttctgactgaatcagcagcatcatcggaatagcagtggttctataggacagaaagcattaataataaaagaaca  
aagatagagaaatatacagacgtctcgtaaatctagtggttctctactgaaggattacgtaccattctttaaagagggtaaaccttgacagg  
ttccattcaataggaacctaaatcattattgttagcttctcctcatttagtcttcttcgacacaaagcatacctttgcagcagaaaaacttgc  
tctacagatttcgagattccgggtccaatgccgtcaccagctatcatagtaacgacataatctcattggcgttcttgacacctcaaaggatccttt  
gcttgagtactgttcatacgtttctaaaattcgcgggttagctagaaggaacctttgacctattttgttggtgtaaggatccgttcttggtgggtggag  
gacgtaacaaccaaggtacttacaanaactaaattgtgagcatctagggtgtcctttaaagaggcagagttacggagtaacgagatcatttctgc  
gagttctgtattcccgttcaagagttgcagaggggtggaggtgagttcagacttccgttcatataaacaatgaactgcgtagcgaaacgca  
attcggaaaatgacatagtgcaaacgaacgcaaaaatggacggaaaggggtgaatgggcaaaaaataaaaaaagaaattcata  
tttagtaaaaaaactcgtgaggttgcgaagtgattttctcgaatttggattttgtaactgggttatagggtatggacaacaatacgcctcaga  
gttttggtgagtgatctacgtagagagtgaggaaagtaagcagtgctataaaatgtagttgaaagtcattgtttacataagagaaaag  
gaagatgatgaaacgtctctgctgctgctcattctactactggcttggtagaacaggaataggtatacataagtgtagtaagctggagcata  
aatgctcaaaaacattggctgtgaaattgtaaaaataataataaaaaataaacagaaaaccgtatttccatattgtatcgttccgggatt  
cctttaccgaagatagaaagccatcagggaattttaggtgtgcttgtttcaggatgagcttcttttgagaatgaaaaccaagtaactcgggtg  
ttggaaccaactgaaacgtattgaaaggtttctatctattctattttgaaagcgaatgcttcattccattcgggtggaagaccatctgtatgc  
aaattcatatgacattcacaggggtcttttagacttataccttcccaattctatattcgatagcagccccaaaaaggaagttcattcacgtgt  
tcttaagttggaacatgcaaaaaaggagatggaacgtactcaaggtatccgaacgaatgtttcacgcttataataaactctcttgggtcatg  
tttctatgtcccgatccaacggattcattgaaagcccaagacagcctagcattccgtgagggaaactccctcaatcgtatcagattagcaaggag  
gacaaaggaagacagcatttaaggtccattcgatgcatctggagcagaagtctgtgatatactgtagaagcatctatcattgaacgaagttggg  
gattcgaatctgttctgagaaattgatccatattttgggattgtaattgtggtgggattcgggaaacgtcggctcaggttctttgttgtctg  
attctgactagcatttagtagaaattggccaacactgaaagaggtttctggccgatcgcgagcaagcattttcattccctcaaggagcacggg  
tgtaacgttttcaatataattctctagatggagcaaacctgacatattgaaaaagctggaagaatacgattaaaactattctctagaatccaag  
aaaaagactgtacgaaagaacccaaagtttgcgaacgtaaaaatgaaatggtgaaagtccttcaagggaattttatgatacaaaaa  
aggtcagtttctgttctgtaatatcaagaaagcaaacggcaaacgaggaacccaggcaactagtcacaaaaagaattgtctgaaagat  
gcaaaagtataaaacaggctatgtcacagctggttcttagctaactaacgcgagaaaggactgctgttgctcaatcatggtgcaggatattgtg  
ttctgggacgaagtaacaggcaattgtgtcacctatctgaccatttctggcagacaaagtcaatatgtgaaaggataaaagaaaaaagatg  
gattgttccagtgaggaaatgtgctagactctctatgataagatgatctattttgatggatttcatgttgaaaggatataattttttacgaaat  
gattcattgaattgaaagcggctttttctggatcagtgcaaaaggaataactagatgcaatggacgaatgagattgatataagaataaagaa  
acaataaacttaagcaagatcaagctgaaacgcgagaactcatttttagttcaaaaattatgattttttattctactcccaaa  
accaacgtaaggtaacgcaatgtggtatcaacataacgcagacgctgattcacaattcatggtcgtggagatcgtccatgaattgtgatttct  
gccgatagtcattgaaacctccagcatctttgctgggtgttgtatgtcgagaaacgatttatcttttgacaaaggagttgcagaggatccttt  
ttatctacgaagcctctgtaagtcgcttccaacgtttcaccacaaacacgtgaatcctatgcccaaatgcaaacaccaacatgctttacct  
tccatgaaagctggaacggacttgattctagggacaattacccaacatgcaggacggttaattggagtggttttctcattggataccaatagc  
aggtctctggatccgtttggactcagaccggaattgaaatcaccgtccatgcgcaatgcaattggaactttggcggaaacgtctcttgaacga

gcttctccgtctgacaactcgacggtcttacgcgagttggacgaactcaagttcagattgagcaacattgaacttcatttgagtcatacttcaccaa  
ctctttctactactcacaaccttacagtccttatggacattgggtagtactcatcgtatgcaataatacatcgtattccccctgctcccttaatac  
catgcaaaccgattgtcccgcctacaacatatcatcctccccggtgttctagagcctgtacaacaggctgtccagcatgccatcacacttact  
caaacatcctcgtcggcagttgtggacggtctgtcgtagcttggctgaattgtgtcttggtttggccagcaagccattgatgcctctttatcgaat  
caacaagcgggcaaacctccatggacttgatacctcattccactccttctgatttagcaacttctacaaattctccccatctcggctcgtgattcc  
tttgctacaattcaccagatcgttctttattccgtccacctccttctacgcaaagtttcagttcttattcaaaaattcaccacctcctctctcgtct  
ttctcccggcattcagtgtttctgatggttctcgttccaatccaagttgcaaaaattccgcactcctccttgcaccagacctccctctcgtcc  
atgtctactagctctactgtgcaccaaacatcccccaagcatttagagaactctcaaggtcttcttggctctcgttcttgataactctttcatc  
aatctactcaaaaaaggctcctcttgaattttctccagaaccgaatcgctctgtaagctctatttccatgatcattcgttacttcaactcctg  
ccatgagcgaatcgataaatgataaggtaccttttccattcccacggttttcagttaatttacttgcatgatttccaaggtgctatctgtcctcc  
ttacgacttttctggactgtactgtccacagttgtcttcttttttttttctccttcttgaagccgatttcatctactgtttataaatgaaacat  
ataataataatctttttggctgtaaggaatccttttgctagatgtctaccttttattccttcatcggaacttttctgaaaaataaaataaat  
agagagcattcaaagtaacttcttctgtttcttcttgcacgaattctcaatgtagccttcttctatattctgtaaaaaagccatcatcgt  
gttacctctgtgacttaccgtaaaaggaccttttagaacgcacacctcgcaatttctcctccaatctttaaagggtgaaaaacaaaaaaa  
caaatatttgaagaaaaagattaaaaaagctggttttgcgttcatattggatgtaacattgtgtagattgaaaggaaacaaagcattgtg  
gcatggtctgaagttttaccaagtacagagtattttatcaaaaatggagagtcgagttgcaaggaaaccagaagaaaaaactcgtagttg  
ccatgatatgaagaataagccatggctcgtttcgggaaaccctgaacaagcagctcctacaacgcagtttccagaagattccctcaaatcgac  
tttcacagaagttaccactttaaaaatctacgtcgtccttctcaatacagtaaaaaataccgaatccaatgccactgatcaatccttctcct  
tatcgttctactttggctcgttcttaatgttacctcaatcaaccctatcaaacggtccagtatgcatatatactccaaacataatctatatgca  
aagcctctatgccgattttgagctccttcgagctcgtcgaacgtcgcaaaagaagtagtacaaccatttacgaccgagggtcgttactacagg  
gactccaaacacaacttggatgtccatgtatttattgcttgaatataatcacataccttgggagcacgactcgcagttttagttgaaactggatc  
agttggatcgttcttactatcaagcaattgtttaacaagcgtgtttgattaactgtcaaatgggaattcagatctgcgtgtcttgcattg  
catttatcatgaaaactctaaatttaaatgtgtccgatgcgtatgaatatgtcaagaaacgatctccttggattggcctaataatgtcgttaactttc  
agcttccagagatcaacaaatgattcgtaaagatccgattcgacatctcgacctacaaccggttcttttctgaaaaaccgtatacagcaca  
acttctcttctcctcgtatctcaaccgattccttacatatccggctttacgaaaaaccaggagcagtggtgagttacaatgaatcctcttgag  
actgcctcgtttcgtcccgctccattttatgttttaattttttgttttgataaacgttctcacactccttctacatttcaatagcgttcgactgac  
tgtcgtctacttttaaacgcgccctaatttctcctcaagtgttttgaatttttaataatctacactcgttctaaaaagtggctctcagtgcaa  
atgacaatatgactagaccatgatatgtgtgccttctcatttaagctgttcttctaaagaagttgttactgtatttcaactagatcccataat  
atgatttaactcttatctacgttctttgttagttacggataaaaacatcattccgtcctagaaacttttgcgtgtagtaaatgaaactaagctt  
taaggtagtaatacagataaactagcttgaatgagtaaacgtagaaatagaaaagaacggagcaggaggctgagtttcttggaaat  
tttgatagaatgaaaagaccttcttctatagaatcaatttccagattaacattcctcacgaggactacctttagtggtcctaataatgaacatcg  
cttttattcatatagcagcttaagttgaaagttcgttctgaccccaagttccaattctactgtagtactacgattacaattttgatgctgaag  
aatgtgatgtattgctatcgagaaattcagcctagctttaaagcggcaaaactgaaagcaaaagttgcaagcaacagagcttaccgtagtc  
ggtgacagcaatgcaagagcaaccaacgaccttacgagcattgccatcacggtcaaggacgcaaggccagccattcacccaaaacctggg  
atcagcaaccttaaccagaggagttgggattcagcgcagagagcttcaacaagcttaacgtaagcttctggtcacagcttctgcaagaaacgc  
aaagtgagcttgacgacgatcaagagccttggaagcttcacgaataccagagcaagaccatcgtgaacaaggcagcctcaaaacctcctt  
caagcatcttcgacagacaattgggtggaaggagcagtttctgctcaacagcctcaacatttctgacgacttctcagcctggggcaaaaatc  
tcttctgttgacattgtagtaagagtgtagcgttaaatcaagacgtcctcgattatgtcctcgggtcaaacagtaatttactccaatactttta  
ttgttggacgaaaaaacagcttagcctacctaaggcatgcaatttagtagcttgaccgtgaattcaattgtgagttctcagtgcatcat  
aatgtaaaaataggaacgagtagcagataagctttagatgctcgtatagtaaaaaaacggaatgctgcaaaagtcgattcttcccttca  
ggatatacatatataattttaaaataattgaagtcatcatatataatcttgcgaagaacaagttcctcgtgagaatacatgagaaaggctg  
cttgttaaccgtttgtccttaccatagacgacgtagcttgaatatgaagacaaaatgaatttccgaggttaagagcaagcgttggagtagaa  
ttgatgtctatttaactcttattcattctattgttctcgcgagttttagaaccttagacttggaaatatgacgagatttaataagaacggta  
tgatggactaactcattgatagatccttccaggttctaaacctatttctgtgcttcaagtgcttatatgggctataaagcgttgcctttatgac  
agactgcgaaaccctgttgttgggtattatctgaatcgatggagccatcatttctgtagaggcatttactgttttggataatgaaaaaccg  
ttggagagccaatgggaagattcgaactcctcgtgtggaagaaagttcggtatggctcttattgggaattggagacattgtcgttactcttggc  
gcaccgtccaattctattgttcatcagttgtcaaatgtacgactcagggttaagtttgagaaattcactatctagtctgagcttggtttaa  
cgaaggatgaataggaatgaaacgaagttataacgaaaggtgatacaaccgaatcgatgatgttgggtgttccacgatctatgacttattg

gatcgagaaaagcatgtaatcgggtgtgacagaggatatttcttacttgggaatgattacaatttggtgacagactatcccactttaaataatgt  
tatgttagggcacttggccttttaacgctctttcagaaagaagaatccttttaagcttgagctaaatcttgagcctgctttccatcttctgtctc  
tctttgcatacttttaccagaaccgtctatagatagctatcattggcctgcgtacacaacattccaattttataaccacattcttctatgaaa  
aaacaaatctatgaaaaacaaaaagaatttccatagggaaaataaggctcaaatcgcaaacagtaacctgggatcaacgatctattattctgtt  
caatcttttgcgacgttcattcacgaataatcacaactgaattatcttgccaacgcttttcaatgtggaattgtactataattttaaattttctatta  
gaatttactgtaaacactatacacgcccgtctctatagattgaattccaatccatatacctaactgattattctacattcgataaagtaacgact  
gtaactgacgtggagcgtacgacagcgaagagttgaatgcaactgaaacagtaggaaagctgtttatatttttacaattattgatttattc  
atgggcggttattctgttcttttagttggttctcactgcttctgtatgtgtgatttctatttttgcgcaaaaggaagtaatacaaaagtaagt  
ggaaatggaaggaagaggatacgtatgaggattttttggctctcgtggctgtttatagcttttccattgctcctggttgaacgcttttaacattgac  
acatgccttttggtaaatttcaaatgtggaatcaacctcagctcttcaatgtgcttcttttcaagcattcgttactaactatttcttactta  
gtacatggcaaatgacttggattttaaacttttctgctgctatataattatggaagaacagattgtatctgcttgacgaaatagctaacgaaccg  
aaaactaaggccattacttacttggcacagttgcatcctctggaatcgctactcgcgtcttggaaatagtttagatccttggaaaagggtagagg  
atcaccattgctcattataaatgtataaccttgggcaatagggattgaaaacattctgtccttctttccatgaattctttatcattttaaattc  
caaggcttctagatgtgcagttctacgttttctatagatgccccgttcatcaaggttctgtatgcaatttttctactgacagcttttcgaaaaa  
acttagtttactctataacgttgaacaaataatgaaaagacgttacgaattgtcatgtagatttctgtatgctgatattgaccaattctca  
aagtgcggatccatgtttgtaactattcattacaataatggtatctaaaacaaaaagaaatagagatatttccatataaatctcgaaggt  
cttgtgttcgatgaagatgtacatattgagtttgaaggcctggaatagatcatcgatgacaggataaaaagctcgtaaattcaaatcgttttt  
ctaactttttagtatgttttgaactttaaatagtacatttactgaagaataggcacctgttttctgttgaattattttatttaaagtaatgc  
agccactctactatataagaacgaacacgatggaatgtctaaacaataaacaagcatgtttgtttatagaaccagaaatattgtatttcg  
tggacaataggtgaaagatacgaataaagaaaatcaatgtttctgtcaattttgtatcactagaaacggtacaggccacatcatgattct  
caaaatcgtggactaaatgaaaagatcctgtcgaagtagaagcaaaaagaaactctttgttttaaaaaagaatttctattacttttttac  
tcaattgattttgaaatgaaaaaggaattctcaatttaggcgacaactacaagaaaatgcaggcacgcgttaagtcttctaatctttaa  
ggctgacatattcttactcaattatttagaagtattcttactaattgaataaactttctgcttatagaggctttctttattgaaatctactgcca  
gatcactggctttattctgttcataatagagcgcacatcaattatgaactacaagaaaatcaattgaatgctttcttaagaacctcaa  
aggatgagcatgcaagagaagcctacttctgctcttcacaagagcactggggccatttcgaaagcagaaagaaagattcaggcaatatt  
ggacgagcatgctgagattctttactacaaaggaggggacatgttcacaggatccgcaaacgcttggggagcagcttctgctatctgtgctg  
aagaatgcgaggaacgtgctaatgcatacaaaagcaagtcaaaaaacttcaggaagaataggattcaaaaagagatattagaacaagtt  
gaagcaaaaagtcgcaatcaaggagaagagcatgcacaggagattgcgtatttaaaaacttctatagcagaagtcgacaagaaatctca  
gatttggaaagaaaactcctaatattatgatcatcgtctcatctgttaaccgtctacagacgtgcgactcgtcgaacaacagagatccag  
acttggaaagaccgacttttgcgacttcaagaagagtagcactcggcctcatgtaacaagcttcaaaaacgattcacgctttacgcgagaaa  
gaatcttcttgagattcatggtgattcaggcgtattcaggattcggttttccagcattttatagaagaagtcataacctccaggttaaaactaca  
gtccctttcccctatgcaggaacaaataaagctgatcccaatctctgaaaccagacatgcggaagtcttgagtctacttctcctcatcttac  
tctttaagtctgctctgaagtagcaatttcaacaactggaaacctcattgtacttttggacaagatattgtttatagaagaaaaatga  
acaatcttctctgtgacccatccaacacatctttgcaacggcttctccaagtgaacacggcttctgttttattcttcttctcaaaagac  
aaactacagatgatctgattgctaatgttactcatccacatatcttatttttggttacaaccttctttagctaccaaggttacctgttcaat  
gctctattcacgttcttctacggttgatgaacaactcgtatcaattctattacatttctaccagtctactagataattagaacccgaaact  
acactataccgtttgaaatgaccgtaggacaactaccgtcatttgccttcttgacatcattatgaagaacatctcctggtgaaggatttcaa  
ttgctttccacgacgatgttgcataagaaatgcatcgtatagatcacacggtagctttttagcataattcgttgctgtggttcgacgaatttct  
gcaggtagtcatatcacatcactcgtatgctatctattcctcatgttgaaccgataatttctattattggaggcttttctaaattgtgaagcat  
cttttattcttatttcttctcagttcagcaagaatctcactcctggttatttgattgaattgaaagtagatctgtgttcgctttaaagctt  
cgtatatacctatttccatataatataaactgtctttactcccgaacttttctcggcttttgcgcttgattgatttcttctctgatctattttac  
aaggcaaaaagaacattcatataacacttactgatacatcagcattttctgcttttggttgtgtttttatagtagtagtctttcaattg  
aacaaccatactgagaaccagcaagaattgtgtgtttcatttccatcgcgtcagataccttgttttaacattgtctcttgacagtgacttta  
tttgcacatttttgaacaccacacgatagaaaaagcattttatcaacaacatgcctccaccgatttcggcagattatcgaccgaatcatatt  
cccctccaagtttaattctgacaaattacctcactacaacactccgacgagcctgagctgatgggaaggatatttgcacataaatgaa  
ccttttctattcgtacgagatgcagaaggactattgatgaaaagagaatcatcacttgggacgaaacaaccaagcgggtcgtacaga  
gtattgtatccattaagggtctgcttgcggtcctttgatacggaaagcaggtggcttctgtgctaccgggttgcgtaacaaaaaaagg  
attgattcttcaaatcgtcacgttctcccctggaccattactgcccgtcttctttattaactatgaagaattgacataatctctttacagg



gaccagttcatgattttgggtctttcgctacgaccttcttccatccgcttccatgtggtgatgaaattcccttagctcctgaactgcaaaggtc  
ggtttggacattcgcatcattggaacgatgcgggagaaaaagctatccattctgagttcgacattagcacgcttggatcgctcctcctaactatg  
gaattgataattacaatgattttaactttttattaccaagccgcaagtggaactagtggtggaagctcaggaagccctgtcctcgatatactgg  
cgctgcggttgccttgaattcggcgatccaatagtagtgcgtctcttttacctcccgtcaatcgtattgttcgagccttacctgctgga  
tgatcgtcctatcactcgtggtactttgctgactgagttccttcatggtcctacgatgaattatctcgtattggcctcctagtgattcgaagtaa  
ttgtcgtagtcgtattcctgaaagtaatgggtgctagtagttcaaaagtttacggggaagtgaagctgctgggtctttagaacccggagacgtc  
ctgattgcctatgaagccgataatcaggatcccctatatttagatttctctctttttgaaattattgatgaaaaggtggggagcctaccg  
ctggcgtctttccgccccaggttggttacatggttagtgaattgcagttcaagacttgcattggttactcctcacgtttctggaaataggag  
gcgccatttccatgatctctcatatcaactgcacgctcctaccagtttctctcaattctggaacatattagctgctcaggaatgttaaattggt  
catcaggaagtgcagatttttagtaacacgcttgcataaaaccgactccaattggacgcattatacaagttgtaactcacttccagaca  
atgctcgttccaatgcaatttcgagtccttggaaaatacgaagaaggttcaaatattacgattgacagacatttttcatggctagcattttc  
gaagaaatgcaaaagaaggaacctgggatcgtgaggactaccctccttaattgtaagtcccggagaccaagatcattccaagaccagc  
tgaaggctctaaaagcttggaggcaattcaaaactcctggtttgatccattgccgatgcctctgagatattaatggtttcaactccgaaaatcct  
accgtggtactggtgtttgtatctgttgccctccttatcgtagttgaccgtactgttattccagttgatgtttgcgatattcgattgactttcaa  
tcaactaagtctatgggacgtatcatatctagatgatcgaattgcaatctgtcctcgtattatctgccgagtaacacagtaactgactttgc  
ggctgattttatgctaccggtgatgaatgtactttagcagcacttgatgaggacttgaattacttcaaaagaacagaccgtgcgaagtgttct  
gtttagaaaccgaaaggtcttctcctcaaatccgttatgtcaattgcgaggtcatttctttagtggactcttcagcctcgacaggcggttaatc  
ttccgagacagagaggacaaacgcgaagttgtggctttatggatttctgtggtccatcaagaagtgagtggaagaatacactaacaagtacg  
ggtgtcactggcttacttctgtgcttgcgtctacgactacctcatctctcgacctcagcagacaaaataaaactattggagtagagttg  
tcccacattagcttggctggtgcaactacattgggaatgtctcaaaatcgtcgtctgaattctatgtaaaatcaaaagagaacggtacaataccc  
cgtcccctgtatgctgttctcatctgaggcctcgtcctgcagattcgtctttacgagtcggagatgtgtaataagcgtaaatggaaaaatgataa  
ctagagttcagatctttatgaattgaaggatgctcagaactagacgagtaatacttctgtaggagacgaagtagattaaaggtccctttgta  
tccagacttttctacgtatagttctcgtgttctcttggatgggagccgtctacattcaacacacagaagtgtttacgaacaagtggagcctggtg  
ttgatccctggtccagatggtgtttatgctggaagtattttataggatctccagcattgaatattgcttcgagccgcacattggattgtggctattg  
atggcaagccaattaacaatttctccgattttgagaagattatcagcgagatacctcctgagccttaccaggtaaaacaatgaatcgtcag  
gtgcaacactgttagttagcattcgcctgatactgcttttggcctacatattgattgagcgaatcctgatggcgattggaacacgagatctg  
taagatgaaattatcatcacagcataattatcattatgctacggttaaatgaggatacttattgcaacattataatattatgattcactgcttatg  
aaaacaataaaattagtaacgaaatcaacagacgttgagaatataattacttcttactgattctaaattcgtttagatcaaaagtcattatta  
gccagtaaatcacactttcagctttgttatattttttgttgcataagtaactaaataataaaaaaacgaattcaatgaattgtcgtgagctgtt  
tcctgctgaggattgtttgttatatattgacttaattcacaggattttattgtttacatcgagaaaaacatattatagccaaacaaaacaatgc  
agctttcacatacacatgaatgactttcttaacggcacttttcaaagattgacattactaggtaatatacgattttggaaaatggaattgttagg  
atttgattattgtccattcgagagctttgtatcacaaaacgaaagcgttttcaactaagtccattacaagcaatgtcaatcttgagaata  
tagccaaaataagaggatctgaagaactaaagaatgctggaaactgttcaaggattgaagcctcccctgaagaaaactttcgtcgtgaa  
caattcatcatcaaaataaaacaatttgaaaaactctatacaagataaaaattagatcttttgttccgctccaccgaaagccgtttagcca  
ttcatcagctgatatacagctgtgtattgtaacaagagggaacggaaaactgcgactacctgctcagctggttatacttactcctgtatgca  
agaactgagaagttaaaatattgaccaatgtctagatggaatgaagagaatcacatgtgtaccaagagcgagagttccattgtgaaaatgtgg  
gatccacagctaaatattagcgggtgatcaacataaataatgatgttgcaaaactaaacacggagatgctgcatctttcgtaaagattgacca  
cgtgtacgagcactcggactaattataaatactgggcaaaacgaagccttaatgatccgctcgggtgtgggacaatcacttcttatacgctt  
tcttgatgattgtaatttttgcactcggaaaccttgccttcttccatgatggaactaaatgacagacgaacaaacaatattcattttta  
acagatctcggaaattttcagaaaaacttttcaaaacaatcctccttgggagaactctgtagatttttccgatattatggattcgtttatgat  
tataaagagagcgtcgtctcgttccggagtgaacccttttagataaacgctccaaaggatggaatattggacatgaacaattctttatgctcga  
gaaccattcaacacatcgcgcaacctgctaacacggcggacgacacaagcgtaaaaggattaaaagtgaattcaacgagcctttcgtttgct  
cagtgaataaccagccctcaggctctcaatactaaatgaggcatttcaatttctctgaaatccatgtttccgatagtttgatccccagctccag  
atagcctttattcattgatagcgtatgaaacccttggcaggcagaagctgaaagctttccaggtccttactaccacctcagacaatgccaatta  
atgaccgtaattcactttgttactatattccggatgaagtaactcaaaagctcaagaagcaggcaaccaagctaccgactcgcgaaaca  
ggagacttatattacggaaaaaacaccgtggcattatgcatgcaaatcgtggttagtttggatcctgttcaggatgacttccggcctgtaa  
acatgtttcaataaggtccaagttgaaaggataagaagaataattatgtggttaactctgtaaaaaggaaaccggctaagttgttagtc  
attaataaaatggttaaaggaacgtaaacagaatccataaaattactaaatgaaatcattatgtaagcttccaggttgatattcaaca

caagaccatcacgaagactccgtaaatagcgagacatacagcaataattctagtaattctcagttcttctctgaagtactatcgggagaagcaa  
cactgtgtgaaaaagaagtaatatagcagaccaggaaggatgaaagaaatgaaagtactaccagtactaccaaaaaagcgagtaccaactca  
agggacgataatgaaagggcaattagtaaagaggtacaagaatacatatcgtaaatccaatatggtaggcattggacatatcgtgagcagaa  
taagaacgacgaatagcttgatacaacgagtttcggcatggatggcattgtagaggatagctaaacagtagcaacatcacgatagccaattccc  
aaaagcaatcaaaaaacttccgcatcatacattgcaataatattcccgaagttaaagaaccaaaggaaaggtagccagcaattgaaacaatg  
agataaagaacgctgaagaacagattgcaataaacaagtgaaagtaataatctatgagaagggatttcacttcattgattacactgaaagc  
atthgatggcaggtaaatccaaagacaaactggaagaacagaaagatacccagaaagagattcaggacgaaagtagcgaacttctccg  
ttccatatctcctaaagaagtataatgacaataatgaccaagtaactgagagagattaaacttataagagacgtatgacgaagagaatct  
aaacggcgcaaaaaagtcaatggaggtcaaatcaaaatagaaaaagaagatccacgtttcacgagattcaaaaattggagcggtgaaaccaag  
caaaggtgcaatttggcgcacgaatgacccacaatacagagatagctgatagaacaccaaactttatagcaatgacgatcaaaaac  
gattgccaaggaagggatgtatgcttgcacggcagcaaaagggcctttccagaggaagacgagcggcgcataatgacacaaaataaa  
acccaaaaacgaagcaaatgctgctaaaaagatggtagacagcaaaaaacaagctagttttgtgaatgcatgaggcatagacaagatgc  
cagcgcctaagatgggtgtggcagattaattacggaggaaaagaagccagcactgccataatgtacagagtcgggtggagactgcaagcgt  
cataatctgacatagttgagatgaactaatggaaatggggaaggaatgaatggcttggtatagtgtagcaaaaacgcttcttagacttaagc  
aagagccaaggagaataaaccttaggtgatataataaaaagaatattgcaaaaacaatgacaatgtccagctagcaatcttcacacaaaa  
acaaaagctatacgaacactgcaaaaacgtaatgaaatcaatgtctactttataaaagaacaaaccaataactaaataaagaagatggaat  
taaatttcatactactcagaagtaaatgtacaaggaaactgtgtacgggtgaagtgaagatgctaccattgatgatcattctcaagacaac  
aacatagagtgtagcggagaatagcagaatgtagaacatgacaaaactgtactaaataagtctataaagtttgattgatctgaagatgta  
tccaaaagagtaaaggaggatgggctcaaacggtgtctgttataagactggtaattcacttgaaaacaggatcaattaagaaggaatca  
gtcatcaaacattgaaaaatattgttacaaccttggagagtaattacgagaatgtaagtttaggactgctaaagattgctgtagctatgaga  
aattggacctttattgctttcaacatattacatagaagacgaacggcttccagattttttgtgatggatggtccattaaagcatagtattga  
ggtagaaactcgatagcccgaatttgtttcaagatcacacgagaaagcaggaaccaaggcaaaaaattttgttttaagaaggaa  
gggctacaagttccagcgggggaacgaagaatatccccattgactagaatcaagcaatcaatcgaacgatgcaaatcattgtaggct  
ggctaggcttagacatgaaaaacattgaaatctacctctttttttgaaaattctgcatagctatgttacacagacttgagggtacacatac  
ggagtttttcagaatgtcctgacttggatccgttcaagacaagatttaatttttataaaagaagatgattctgtgaaagcgaatgtttaaa  
accagtcctcagcagcgaagccgacaattgtcgtttgtttacatagatcgttcagcgaatatggtcctcttttgacataagtaggggaaaatc  
aactaaaagatccagtcgtgacgaaagaagaatctaaatcgttcgacaaccgctgaatgctttataggatactgagtaaacatgagggacat  
ggttcagtcctgcgaaaatgcaacttttacataaaaagcttaaaaacttccatccattttctatggattgattcattgagttttattctgttct  
gacacagggtattgttattcgcctatgcatcataaactggctactgttatacagacaccggtgaatcaacaattttttgcttaagaatgcctc  
aacatcctcaaaaaagcagaggaaaataaagaaaaagaactaattcaaaaaatgaggaaagaaatctgtcaacgcgaccaatggtcga  
tttcagaagaggaaaatgaatcttcaagggtcagaaattactcgttgtgtcgcggtatcagagataatgacgatattcaagtacggagg  
ttatataatcaatgtgatcagttctgtcgtggcagcatggtcactgcgttggttttcaaaaagaatctgatgttctgacgtctattatgcgaaata  
ttagaccagaactcataaaatatacaacgaggaagagggtatggagtagaaccaattcattacctgggagacattttgatttctacagg  
actttgattgcatacacatattatgtgaaggatattatgtaaccaaggtagaccacaaacaatctaaatacttaggtcttattgtgtagcagaaa  
cctccgagtcagaatctccactgcttctcctcatcaccagttgtgaaaaagcaagtgccaaaacagcgttaccatgaactctcgagatgcc  
gccttggattcgaagaatatcttctattgcaaaaagaacaatctcctcagagaagatctagagggtatgataatcttgaataatattattatg  
atcgtaatatgtaataggccactcttccaatcggcttccaccgtccaggctcagatctggagaagcattaccaacgacaatgtctcca  
gaagagcaagaggaagaacaaaaacaagaacaagaacaagaacgaagaacgagaacgacaacaggaaacgggaacgggaaacgag  
agcaagagcaagaacgaggacgagaacgagaacaagaacaagagcaagaagaacgaaaaagaaggagaaaagcacacgaagcaag  
acaagagctggagcctgagaaaaattccaaagaagaatcaattcctattgataccgtttcaaacgaagaagagttgacgaagaagagaatcc  
ggaagcccaccaagtcaaggaagaagcggagtcagcttctcctcactagcagttcaatctacccgggtatcctcctccacaggaagggcg  
gtggtcggagatccaaacgagaagcaccagttgataatgaaaaaggaagctttcccatccacagcaggtcaacggggtcaaaaagtagaa  
aaactagttccgaaggggaaaatcttctgcgttctgcaaataccatcgctccggttcaaacatgtggaaggagaacacacaacagagac  
aaatacaaaaataaaggattgcatccaaggattactatcactgaaatgaggaggcgttgcgacaatgttagaatatcggctcatatccag  
gtgaaatggcatctcaatcggcgaattcggttctggatcgcaagtgacgaaagaatcccagaggacgagaaggaactcttctgtaggtg  
ataactgacaaggaattgttgcattgggaacaaagtttgtaaaacctaatcaaccggagcctcttggctgacttttatgtcttgattt  
gttttaacattctgattttacgagcaggtttcggggttttgtaattgttttaattaatccatcggaatttaattgcaacagcaatggttttag  
attgattgatttttaataatttctagagttatttcagaacgaaaattcttatattggcaatgttttcagactttttctataaaaacgctaca



gctgctgactcgtgatcaaaaaataacggcggtccccggtaaattaacttttctgtttcgttggtgcttttctatttgactttctccttac  
agcccttgggtccttttggccaacattgtcggcaacgtttatttagtgcggcctacgacttaataaacttaattttgatataactgctggtgctgt  
attgctgttctattcgtgtcattcttgcgaaccgaaactcttagagagtaacaattcactcaaggcagtggaagcgttgcgagaattgc  
gcgctctttgtttctccttggcttcttggctctacctgtttcctcatcatgcaattcttctgaggcacgatggtggtctcatacctacacctc  
ccgcggtgggtgcgaagaagggaagcggcctgcggttgcctctgctctgtatgtcggctgtcaaaaagcacctagggtcttttctagg  
tcctgttagtcccataatgtttatggggtctgctctgtaacaggggctatcttttaaaaaaaccttttctggagttcttttgtattttgtt  
tccaagaaaattaatcacataaattatataaagttccgagtcggaacatggatgatgtttggtattatataattatgattacctttttataat  
gaagctgatcgtgagttatgtgtgtaaaactccccgaaaattctgaaataatcctaattactcgtttggaacgagatagcttctaattgat  
gatcttagataggtaatgaaaccaagtcggtgatgtgctaataatgatgaagtaaggaagttggaatctttgtattctattcgcgacgtttctt  
attgcccattcccagcttctttttgattcaatctgccaactgagaaagtgtcgcctagttagttatctttgatccgactctgttacaatcggtt  
gatgggctgatgtttctttatttctgtttttcttctctaactgctgttctgcttctgtaactggttgcgagtgaaagacaccgaagttg  
gttctgtttttttgattttatataagaatattatgtttgatgagttgtttgtgatgacacaactgcggaagttcccagtagaagcaacagc  
agtggtcgtcctttgcatttttaataatcataatgaaatgatgttcttactaacttttctcctcctcaacaaatcccaggaaggtctttct  
ttggagtttgcgatcattttgtcgggttcttctgtattgtcgtattatataatataataaaaaacggattggttgtggttttacttctgaat  
atttttacagtttaagagtttcccaactgaagtgaaatgaatcaataatgttccaaataatattcatgaaaaagctttgataaacttagt  
aggagtagttgtaaatggttggagtcgattgcttttaacataataaaggaagtaacataataggaacataataataggtactacttaaaa  
atagtttcttctctataaactttgattgagtttagatataaacaacagttaaaatattgattaggtctcaaatcctttgatgatgtgtgtcgt  
atgtattagaatcaaacgatataataaaaaaacaagaaactgactattaagttacattgaacagaaatgaataggaagtagtatagcgt  
actaatataataatacataattattgtctatctaaaatctcacaatgctttaaataaacaagatattcttaattagtcgtggtcttctctgt  
gtgcaaaattttcatctaagaaatcaaaaacaagcaattcatcaggaaacaacaataatcaaacagttttgtctcgtttcttctgattttctt  
tagtaaggctcgttcacaatgttctcgggagggttaattggatgctggtgacatatagatgctcgcgtaggcctgcgcaagaagactgtca  
atcatggaacatcgttgggtaagcaacaatcatattttatccgtaccgaagcgaatcttctgcttgaatgttggcttggtagcgaatctt  
gtatttctgtcttgccttgcgcaaaatcaagttccagctgattaaataaggaccaacgctcgcgatataatggatgttcttctgagcatcaattc  
ctgtattaaatttctgttgaatgatacacctccttctaactcacctgtcatcattgcgacatgttggactatactcatgtagtcatgactatt  
gattctttcataaagcttgcattgcatcatcttgaacttaccttagttgagacgcttccggtttggcttcttcttgaagctacgttcaaac  
ctagtttgcctgcatcgtcttcttggattcgagcatcaatcaaacagataggtttgcaagtcgcgagaaccaatctcctcagctgtgaca  
tcaatacaatgataggtcacccaaggcaggcaagctgtttggcattaatacctagcctatcgaacaatcggatatacaccctgtcgtggca  
acggcaatgtagccttttgcgtagtagccgtgactaaagtattgctgggtgacatactgcttaaacctcctgccaactaactatttcttctact  
cgaggatcaatacggaaaatggagttattggacaacccaatgtctttctcagtcattctgggcaaaccttgttgcaggagcctaggccact  
aagggtacatcttctggttttccattcgtctaccatttaccatattccagctcatatggtataaaatggtaggggaatcttccgtctgaatac  
gatggaggaatcttattgtgcaacaaatcttctaggttgcagaggttaccgctcgttagacagattattatagacgtatcgaatttaag  
ccatcatccacgtcttaatacccacatctattattacgtgcacataagaacgatcttttctatccgaccgacgtataactattttctcgttc  
tcggtctcttttccacctgattcatcaatttcaatttctcactttcactaaatcggtaaaagaatcgcgagtttcatattcgtttctctctga  
gtctccaattgcaactgacccgatagcttcttcatcttctcagattctgcatcgggcatttcatcgtctcctataaaatgatcccgaacatactc  
ccgctcatcatctttattttgagccattttgttattcaattttccataaagctcgcataagaatcttctggaatttatcctctctctgattg  
aaaacgtaataaccatgaaaatgctgttccaatttcatcataataattccagataaaagaagatgttcaaggaaaatactggattcattttg  
attctaccgattgcttccagcatttccgctcttggatgtgagcgtaaaccagtaattccagctccaagatcgtaaatacaggcttctgcatctttac  
ttttagaacgaatatttctcacaagagtcataaaataaagctggcgtgtcaaaaaccattaattctccttcaaaagaatcttctgtttcttct  
tctcatcaatctcttctgttccagctcgttttcccttctttgaaatttctttccaagtctcagacttttggggtgtgttctgttttcaagctgtt  
cactggcttgcgggaatgttgcacttccgaagcttgtgcttgaagtataaactcctgggctgtaattcatctaattcgtcctgagtaagctgt  
cgagacttacgacgagctaagtctcggattcagatctagcttgaattatgttctccaaactatcattggatgaatgcggacgtttgataggaa  
cactgaattgtccaagtctgcaagtgtagcttctgtgtgaggttggcgttatttctgtcacaatgcatgcaacgcaaccattcaaatgtatat  
gccactccttctgcaagccttctgcacgtaaatcacaagaatcctggaattatcccacatcatcgaataaccatcctttttg  
acttcaaatcgtaaattcaatcgttcatataaaaaaggcttgcctcatcctcaactcatcagatccatctccttcaataacttctcaccttctcat  
atgctctctgaattaccagctgatattggtattctgctgttcatctcgaatggaagcactagcatctttaaactgttttgcggtggttagtaccac  
gttctgttattccttgtttcatgaaaacgtacatgcaactcttaaatcattatgaacagaatacaattggccatattggaattgcacaattca  
cttgaagttgaattcccataatgatttctaaattcgttagcgaatcatatttctcgttctttagcgtaccctagggttttagcataaacattt  
tcaaaatttagagtaaaatagctcataaaaagccaatttcttcttttacagattcaggcactttggatgcgtctacgtgtgttctttagtcatt



catatttctaaatttgctatacagcagctatactctttaattataatttacaggaacaaaagcgaacgtacctttctagattagtctttacgg  
ccccttcattccctttatattaataatacactatttcaattatgattggaatatccgtgaaaaagtaacgggtgcggttacctttctaccgagaaaga  
cagtagcgctaaatgaagctttaaagacttctaaccatttaacctgatctttcatggctttctgttacatttttctgtttttttgttcagagta  
agagtcttttagtctcgtataaaaaagcaagacttataagcaagaataatgatagcaagctcttgataattcgtttattgcctaataagaagcc  
gagaacgccaaagtccataatcgagaaaactaatgacgatttggtttaaaaaacttccagatggagttgtaagctctgttctcgtgcagagaaga  
atatctagtggatgacttgaagatgcaattagtcaaaaattccctgtgaggatcgcgacattttgatgcccagaaactgaacattgccttgtt  
gtcctgagcaattgttctcagagcctcaatctagagatctggaaccaaataaaaaattactattgacctgaattactcttctcatggacaaa  
caatagacgaagcgttttggtagtgcttccgttcttatgacagagtcaatcagacaactcgttgccatcttcgaggtcaaataagctatga  
aatggttgcgaacaataactcctgaattttcatccacatctcaaatcccaatcatcgctgactcgggtcctcgttccaagcagccctcgtt  
ccgaaatccccgactctcttctaattcctccatcgagcaccagtaactcttattatacaaggtaccagatcgcgaaccccttctaactgt  
tctttaggaagaggccctcaacacactcgttaataaaccggggattgttttaccctgctattctcggcaacaaagcttcttagtctgttctgg  
tgtctcggatcatgcttctgtgaaagaacctaccctgtgtcacggccaattccaacaagcgttcagttcttctactagttctggtaataaccgtaa  
aaccggaacagaagaagctccagagatacccagagtagtctgattctttataactagcccaactcgtcctcaattcagagttccttgattg  
atgagcctgcttctccagcactcaacaaatactgcccagctaccgtaaaggctggttcagaatcaaaaaataagcctgctatatcactcaag  
ctagtattcagaaaaaccggagacagtagtagaacaattctcgtgaaatgttattggaacagccggtatttctgcaaaacgccttttgcta  
gtttactgaaaggtgcttctcccattgaggttcaattgtgaaagacaacataatcaagaaaattctcgtggccttcatgaagaaacgtaat  
atttctcggaaagttgctaaagatgggttggaggcttagaaaagtggaaaaagaaatcttatcatttaattctaatggatccaactgccaaca  
ctaactggcatagaagttacaaaagaaattcgacgtctagagcgttctaatgcatcggctcgtcgtcaaaagcctacagaacctattctgaa  
caagaattgctgccacctgataagttcagtcgctgttattattgttgccttaacagcttccagcttaagtactgatcgaacgaagcttagcagc  
aggttgaatgatttttaacgaagccggtatcgctggatggctcgaagaaagaaattacggaatgggggtgcatgcaagcacttattgactggaa  
cagatggcggcgtttctgtggtcattaattgttttttttaatatcttaatttttttcatcttactgctcgtgaaagtaggatccattgagcttgt  
gatatattatacatttctattactgtttattatatttgtaactctggtttaaagaccttaccctgactgattttgcttataggtttttgtgta  
ctagaaattatttaacggttcacgttttgcattttaaataaactgtgcttacgcgtaccacaagaactgtgtggtctgtcttgggagt  
actacctggagattctgataatcgagcgaataacttaagtaatacttatcgcaaaattattatattgtaactatttactagtgataactac  
taataatgttctgtatgaactaactaaactagttgattagttcgaccgcaaaatcttattaactgaagatttagctgtaatttagccatgat  
aactattatgattgtcttcttcaatcgtaacataccatttctctatcgatgggtctgtatttttttttttacttttctgtcacggcagaac  
ctcacagcgaataactgtatttcagtaaaaaatattaagtagcattgtattgtgtatgtaactggatgctgttgactacgttttaagcgtta  
gtaatgtccaaggattgaaactaaatggatgctgaaagacaatcgaaatttccagtgtaagattcagactgtgactgatcagtgataa  
tatttgattagtgatcattcattaatgttcgatcgcttattctgattttgtatctcgttttttattgttttacttggattatgcaagatcct  
ttaggattatacttattagctgatattcactaatacttgattataacgcgttaacgcgctatccatctgtgacaataagactaaaggatgaa  
acattacaatagtaacaaagcatggaaaaagccttcagaatactgtacacaaattcagagccaagaattagaaaaacagaattatca  
gtcgaaaaagctatattacggcgtaaaggtcctgtcgtggagcgcgacaataatcgacaattcttaagcttaaggccatcagtaatttctg  
taatttttttcaaaaatccccgactgtgacattggcaggtttctgactgaaaggcgtgaatttgaattacattcaagagaaaccactttct  
tatatagttatacttctgttgatgaatttttagtggtaaattgtatctatttaatacggctcagcaacattcaagtataaacggtaactatctacct  
aatttattcatctgtgtattacagttctagctgaagactgtttctctaatttgaattcaaagttttctgtccatacttaactacgaagactca  
ctttctcaaggttttaccacatttttgacaaaaaaaagaaaaagataaaacacttaagtgtagtattggtgaaaaagaaaaatg  
aagatgaatctatttccaacaagtgaacatgtaagaagcttgctactaatgaaagtgaagtgaggacgtcgttagagaagaatcgtaat  
attactgggttattcaggattcggctaccatggaattcaaatatgagccctaaagacgattgaaggggacattgtgcatgccttgaaggattg  
ggatctaaagaagcgacattagatgaaagcaccttgatcgctagagctcggaggacagacaaggagttcatactcttgaaaccttg  
tttcttaaatgtctatgtacaaaattcgctaaatccatcagagttgcgcaaaagctaaatgctaaattgagcaggcaaatcgcgtatgggatg  
tattcaagtaaaaaagtttcaatccgagaatcttctgtaatcgctacttacgaatattgataccatcgttttcttctgatacctcaaaaagatt  
cgacaccattgtcaaaaaatcacagaaaaatttgagaggggagcaaaaaatcaactggatagctgctactttctcaacagttgatactagg  
aagtttgggaacaagtgaaattagatgcaaaaaactcaagacgaatttaaagagaatccggaacggttaccacccatttactggtttctt  
cctgagaaacctatccctgctatataaaggtaaccatgaagccaagctgaaaaagctttgaaaaacgcggaccatttctattacatgaacta  
tcgagttcctgaagaacgtctagaattacttcaaaaagtattcaattgtatataggaagacacaattttcataactttacgatcactcaagacca  
agagcaccagcaactatcgaaccattgaatccattgaatgtggtatgccgttctttatgagaattgggaatggattccagtaacaattcgcggt  
aattcctttatgctgaacaaattcgtaaatgattgctcatgctctaatggtgatacgaagttgcgcaagtttgagtgctatacaaaaagctcttc  
accggaagtgctatgaatattagcaaaaagtcgggacatgattgggttgaaggatattggttttccacttataacaagtcattgcaggatgaa

aatcatgtcaaaaatagatcttgtcaatacaagaacaaatggagaatcttaagaaggaagtcatttatcctgacattatccaattggagcagaa  
agaaaagatgtaagtgtttttctttattcgttactaacatttgcaggttcttttagctttttgacttatgctgatcagcacacgaaggatcaattgact  
atltattcaaccataaattctctagactttgtttatctttctaagttaggccttctatggagaggatttagtattagaataaaaaaaataccagt  
tctgatgtattgaagatacaaaattaataataaaacggaaacccatgtatttttggcattctgtttttatatcatataatcatcctaagatgt  
accctaccctaacgccgatgttcttccattatattgggagattcgttcatcctttaccaactaccaacatagatatcgaacaagcaaat  
tgatatgcaataagtgatttttttgaccttttgaggaaaatcgtaagcataaaagtctgaacaagaagaagaatgaaaatagactaaaaa  
agatatgtatgatgaacaatttctgctgctggaattgatcaaatgaaccaacgctagctattcaacctttacgaggactattttaccctgtta  
aggttgctaatacctagcaagaaaaaattgatgatatacggattgcttggcgctattcaagtaaatccctacgagcatcaatacatgatatta  
aatactgaattgctataataaaagcgttttacattgtcctatctatgaagagttgtaaaataaaaaatgtgagcttttagtagctttcatgaattaa  
gacattttggtaaatcgcaagtagtggtagaatacagaatgcaaattataacggtttctcattttatttattctttttttaagagtaat  
gtgtaaacagctaagaataattaaataactgaaaatagaactagctacacttttggttacgcttcttagcactgaaggacttacactgac  
actcatagctcgtcctttcccaccatcgcaattaacgccaagaaaagggtgattgctgtttttcaaactttttaccgtattcaattcaagtgg  
ctaagttagatttttttctgaaggactacggcgattcagcaattattgaaattgttcaacaacaggtgctttgtgaggatcccaccaagcttt  
ggatttcttaacttcttcttaaatcaatgtccagaaatgtagaaatgaagcaaatgctccaaggactctcaagactcattatcctcagacat  
tacatttcacagaacggatggcccacaagagaatccggttttaggaagagacgaattgaggatattctcggcgagaaagtcagtttgttctct  
tctggacaggattcaagaaatccgtttctgagctatgatgggtcaggacgcatgggtcgaatcaatgatcctaacaatccttatgtcagagccaca  
gggtcagatgtacggaatcgagattccttgcgtaatttgcagatcccattcaaatgaagacttcatacctgatggaggacaaggatttttg  
aacgattaagcttgggaagcgtgtattcaaaaggaaagaaaacatattgatccaaaagaactgggtcctagaatgattaccttaaatgactat  
gctgccaaccatttttagataacgctcgtctcacttgcaagtacaatgcagtcagtttctccgaagttttaaaagagcaattttccaagtattc  
aaatttcttcttgtttacagctgtattcaacagattccaggaattactccatgaatcgttatacaacaatcggccccatgctcgttctgtct  
gtgtctgggttaaaagaaatcatggaagacataaaacgaaagaagcaggatgaggaaaagaaataatcggtttgctatgtttgcaaggtactg  
ggttgtcgaagcagtggaagatgtccaagttgggtatattgaaagtcgtgtcgaactttcttctgctgatctggcttgttcttctt  
ctgagccagagggtcttgttacattgagaccgtaatcttgatggcgaaacaaacctcaagtgaaacaggcgctccgggagacgtcagttg  
ttgaagcctatagaattaagccagctggaaggcacagtaaaagtctgaacaacaaacaatagctgtatcatatgatgaacattgaaactct  
tctaatactgctgagttaccctgagtcagaaacaattgttctcgggtgtcacttcgtaacacacctgggttaacggactgtcgttttcac  
tgggcacgagacgaaactcatgaggaacacaaatggaaactccgtaaacgtacagctgttgaaaagcaagtaatacagacttcttacct  
ctcttattttgtcttcttgtttttcttcttacttggctcttattcaacgatctgtttatggctctgcttttctgacttgtctattaccgcttctcggg  
gtgttgaatttttaaacagcttctgacattttggattctgactccaatcttcttctcttcttcttattgaattggccgttatatacaag  
ctcaacttattagtagtaccctgatattgatccatgaagaacagatgtaccggctgctgtcgtacatcttcttttagtgaagagttgggtcaggtc  
ggttatatttttagtataaacaggtacgttgacacgtaaccaaatggagtttctgcaatcctatcctgctgattagcttatccgatgtatccc  
tgaagaccgagattcagaagaattggattccgacatgttggtatagcacttctacttataaaaaaatcttaattccagcaatggtagaata  
atcatcactttctgttggctctcaatttgcatactgttattcggagttgatgaaacatccaattaatgaaatatcaggcttctcccctgatg  
aagggtcattagtaaaggagccgtaagcattggttacgaattttggctagaaaaccagatacgttacgggtaaatatttgataaggaagag  
acctacgaattgctcaacatagtgagttcaattccacgagaagagaatgctattgtttccgttgcagatggaagagtcagattgatataa  
aagggtcgtgatactgcatccttgacaggctttagcgggtgtccgtatctcaactacaattcatcattggaggattatgcaactgttgcttg  
cgaacgttgtgtatcgtatgagagaatatccgattccgattacaaaatggcagttatttacgaagcagcatcaacaagtttgtagataga  
gccccaaaataatggatgctgcagaaatgattgaaaagacttgacacttctggagctacagctattgaggataggttacaagatggagtcc  
tgatacaatctcaactacagactgcaggcataaaaaatgggtcttaacaggtgacagacaagagaccgcaatcaatattggaatgagctgt  
aaacttattgatgaggatattggccctagtcattgtaaatgagcaacaaaagaagccactgcccgaagcattatgtcaaaattatctccattat  
agaaatgaacataactggaagtatagagtcgatggcttaaatcattgatgggtttcttcttacttcttagagcgttgcgttgaaacggcgctt  
ctttgagcttgccttatgccgtgttatatgctgtcagatcaccattacaaaaagccttggtagttaagatggtaaagcgaacacggatt  
ccattttattagcgattggtagcggcgcaacgatgttccatgattcaagaggctaacatcgggtgcggaataagtggaatggaaggcttacagg  
ccgtcagaagttcggatttcttatttctcagttctgtatttaagaaagctgttgggttcatggatcatgggtcaccagcgccttagcaaatga  
tattgtactcattttataaaaatgtcgtcctctatagactcaatttggttgcttctgtaatgcttttctgggcaagttactacgaatcctggctca  
atcttttatacaacgttctgtttacagttctgcctctattgtattggaattttgaccaattcgtaaagtgaagccaactatataatctcaac  
tctatcagctaggacagcgtggagagtttttaataataaaacgattttgggcatggatagcaaatgggttctatcattcattctttgttctatgtt  
cgattgcagttgtgactctgatggccctaattctaacggcccacttctggccattgggtttggggaaccacctctatgcaactatttagctact  
gttttaggttaaagccgctctatcagtaatactggagcattacatgattattgctacttagggcttttcttgggttgggtttcatgcccgatcta

ttctatagttgcccagccattgggtttcaaggaatttaaggaattatacctacctgcatggaaatctaaaatttgggcttcaatactgtatt  
tctacatttgcttaatgctgatttctgttggaaatactcatcaagaatgtactaccccgaagagtatcattacgtccaagagatacaaaagat  
aatgttacagactatagaccggaatgattgggttccataaggctattcgaaaattcggcagatgcaaagaatgcgcaaacagagaggatg  
cattttcacaaggagaggaagatcaatcagaatcctcgatgctacgatacaaccacgttctgaggcttatggagaaatgcgctaggatctt  
cagacagaattcgaagaatgcatgctgaccttcttcttttttctaaataatgttttaagttttctaaatgttttctgtataacta  
aaaaatcactcgttaataactgcgggtattaacttttagattactgtttttaacgataggaacctatacaaagagagcatttggctcctcgaa  
accgaaactgttgacagtgcataattaacggttttactttggttccattaggaacgtaatcgaccgatcttcttctgggatcgggtttttaa  
atthagataggaggaataatcttacggtggttagtaaaagagataaagatatgtgcatactcatgaatagccaaaatagtaaagattgat  
tctactgcccagcagctcctaaaagggtgccaatggagccttttagagctgcacacaggaagcgattgagggtcttggcagtagcttcaaaag  
agtagcaatggcctactctcagatacatcaccaagcttagtgaggtagcatgagcgtttatataatccaagtctggggagaaacgttggcatt  
tctcaaagctttttcatagccaagtacgcagatgaccatttggatttggggccgttatattatagttatcggcagattgacaaagccaagaatt  
tcagatatataggtgatttctatgcttggcatgctcgaagtctcagaggaccaagctccggccttctcggatacaaaccatcttctcga  
atcaaatgggagagaagctttgatggatcttcatgaatttgggataaacttctggcttggaaaaccagctaaaacaaaaggatttatgca  
tgctcagaaccactgctaatacatcagcttggccaagttgatcaagttgtaggcatcaccaatggcatgacagccagcagcgaggcgg  
tggttacagtaggtgcatgagataaaaccatactgttgagatatgtagcctgctggcatattcattaagactttgtaatgattctgggagaaat  
tttctgattcgtttctcacaatatacgttttggtaagtgcttctaaattaccagaccagttgcataacataaccctgaaaaagcactgt  
tagcaaacatcttaagccttatgactaaattacaagcctgcttaccagaagcggcctttgattacacaacatacagtagcttccctt  
tcttctcagttacattaaccatttggcatcagctaaagcttcagcagaagcagctaaagcaaattgagtaaactgttcttccagtagttac  
ttgatcaatacaagttagaggattcattcgcctttagtgcttgggaaccaagcctgctacttgactcggcagggactcaaatccgggtt  
atttttaaagaacaataaccagatcttccctggagcaatcttccacgtcctttaaactccacaacctagaggagtacagctccagctccagtg  
attacgattctcctcatctttatgttaaaaaactaaaaactgttcaatttagttcagaatgcaatgtattttaaaaaaatatggcatgata  
agctaatgcgccgaattgcaagaactgggatctcaatatggatgtaagtatctcacctacaataataatgatcaaatgaaatgcattttcg  
aaaaattacatcttatatgactagaataaatacaagttaaatgaattagaatcaaatgggttctgcttgcgaaacggattactgttgaacgtgct  
ttagcaaaagatgaaacgaaaatcgctgcttttaaaaaagtaaggcttcttcttattataaatgcaaatcttactagggtcagataaacatt  
atctcttattgcttttagattacatgacaacttagataataaatgatttgcattattaggatcaattgcaaaacgacaattagaaaaagataaa  
attaacaacagagatgtgaaataagtgaccaagaacttcttagtcccacacaaaacatgtacttgaacaagatacgaagtctaaatataaa  
tagccagcttacaagaacgtatctgtattaaccactcaacagagtaattcatcattaaaaggaccagtttgactttgtttcattccgaatag  
gaataccattgacggaatcgagttgcttgaataatgaacaacttccgatgagccataactttagaaggagaaaaagtaagtattgacagcctt  
ttgagaagtagcttgaagagcaacgtatgcttcttcaatacacgaccaagctaccttaactcgatcaagggttgaccctgtgc  
tttgtatagatatggcatatgctaatacaaggaattgactcctagatgctgaattcaccgttgggtaactctatgttccaagttctcttgt  
accactatggttctctcgcgcatgccaagttgaaagcgtacaagagccatttctgcatatagatgactttttcatggccagcaacttatg  
ttttttgctttacatcgggcagatcatacgggaagtacatctaaggatcgtattcaaaaggatttctccttgcatttcagcatccttcttccatt  
gatacgttcttcatgataaacccaataactttccaaagatccattaaccaatttggcatcaatttttataagcattactgtgcatttatctt  
taatacaagggttgacagtgccatacaatctgaagcaactgtctcgaatctttatcacgaacgggtccgctgtcaatagcagtgaaaggtta  
gggtcttgatggatttgtgcatacgcataaccattggaccgctgacttcatgacgagttgggaatagctctgctggcagaagtccatctgcatagt  
tgatttctacttaatacctaaacttctaactgagtttctgataatcttccagacgtagctcattaagcatgccgacaaactcttcatcttttg  
tcgaaaaacatgggttaaccaatggtataatcaaagcagtttccatgtattagattcaaaagaaaatttgccttcttctgaaatcgggaaca  
ggtggaagctggaaaaaatctccggttaaaactaactgtatgcttcaaaaggcttagcatcttgcgaattacagagctacttcttaacttat  
ccataagatctgcatcaaccatagaaactatcagagttagtaataataggatgctttagtataccttcatcaataatgagaactttgttgcga  
agccaacgagtagcttttttgttttcttaatttctgatacaagaaaatctacagattcttctgtaaccagcactgcaaatgaatgcatgta  
acaccaccaatgttcatgctgctaaccgtagacgcagtaacagcgacacggctgttcttctggtgtttgttttaatgcttcaatgattttc  
cttaaaagaacagattaccagtagcagaccagtgaaaaaatgctgtgctgttgcacacgaccatccaaaatctgttttctgctca  
gaaaggaaaaactggggacagaccgttccgattaggatctgaagcagctcctaaacaaagaagagtagcaacaggaatttggaaagcggtagta  
gaaacagacgctttttgtgatacgtcatttgggctaccgtgctagatttgggcatgctatcaagtgaataacttctgactccggtgaagatt  
ttgaaactcacttctgataaccttttgggttccattttgatacttcttcttgggaggagttggatctccatcgaagaggatctaaagcca  
tggaagagtgagatgctttagttgatttcttgcgaacgagccaaaggcctttagatttgggacttccagaggccttcaaccagacgagg  
aagtgtagaagtagatcggttagcatttgaatcatggatccagttaacctagtagctcagggcgatgatgaccaaggaattgcttcttgggt  
aatttcagattcaaccgcaaaatcgtcatgatctgttttcatctatgtaaactccatgtagatcaggagatttcttctcgtcagctgtag



gactgaaaattggcaacgctggatctgaagactcaaaggcatcgtttcatctaggttctgaagaatgggtttgaaaattctcttcaaaggag  
cagttgtttgggggaaggaggttaactgcttctgaagcctgaacagcaggttggaaagtatctgaagagtagttatgtatatccctattgacat  
ttgcgttccctttgcttgggaataagctaaagtgttttctgttagctctctgaacatcctagaaagtagcaccgaaaagaacgactatattc  
aataaagagagacaagagaacattcattaaagtttaagataaatcgacttccgttatctactgccttgcctaaagaagcagcaagaggatc  
agtcaataaaagagcgcgaaattatagaaaaccaatttgtaaagagtccaaaactttccaactatagtttgcgaaaggataaaaagaatctt  
gtataatatttttaaatgaaacgtaaaggtaaagacgtatttctcgttaaagacaagaagctatttctccattcgcgaagacgactcctca  
atgaagcttcaacacgacttctgagaagattttttgtataaattcaaaaatcaataaattcttccagcttttcacacgaattcgacaaaacaagc  
attggctcttttgcagtgatgggtaaagcaagtacgacacacgcttgcgctgcgcttcaaaaattgaacaggaaaaataaacaacaaa  
aaaagtaaagaataaaggatcaacagaaggaaaaggagattgcttggatgattgctgctacaattacaacattatacgaataactgaa  
agtaatactcacgtagaaaatgaacgcgagcaacaaatgtatttaaatgtatgagaaaaagaattaaaaatgatgagaagcaaaaata  
ctatcgatataataaagaccaatacagcgaacagcccttttactaattcaaggaaaaggccaataatgggaaggaccgttttagaaaa  
aaccttttttattgtctaccagccggaattaaaacaaaacatcaagataagtaatgcatcctttagaatagggttgtatattaacgaata  
gtttacactcgatagaacacgcacagacacttgcacaaaaggtaactggcagcattaaattaaatgttaaagtgaaaaaatgagtgagaga  
agagaacggaaacaggagagaggttagcaagagatttctgttagtaacaaaaagaggaaaaatgtaatacaataaagtatagttaaaa  
catgcaaaagtacagaattatagtaacaattattgtagagtttaagttaggaaaagaaaaagcaaatgtgacataacaagtttagttaa  
ctttctaaactcattggtattagtcctttagcttctcgtcaatcatgctctcagccttaggacccataggtgccagtagctgacccagaag  
taaagaagggttgagaaaagtcttttggaaaccgtaagggttgatgaagatcgtgatagcagcattgtagcgaagaagattgaagagg  
atcgtaaagggaagataaccacagtgatcatcaacagtttcaaagtgagataaggtaaagaaacaattgcttggtagcgttaaacagc  
atgagataggcaaccagcacccaagtgctcaaatcaacctcaaaaggatgggtgtatagagcaccatggcataaggacgtgtaaac  
gatgatggtagcatggatcatggttagagtttctgttagtgcaagatctgtgccaagatttgcaggtatcgataatgaaaaaggcaa  
ggatgtattggaatagggttacgaaataattgtaagcagagaggggagaaaggggagagcatcgataatggccggaagttctttcaaaaa  
aggcacgataacgcaaaagttgcaattgatgattacaggttcgggtagccttcgaaaagagccaaggcactccgacgacaatttcacagac  
ctgctgaaagacgacggcgcaaaaaacagccaagtggggaacgcgattacgcttagtaaaactcctcgggagaatggatacgatactttcaaaa  
aaagtgacttcaaccaatgaagaaaagcaaaagaatccagaggccaaccaatacaccaggataggcgagattaaggaagccgtaactggatt  
ccaggtagtaagcatttccatttctgacatgatggcaaacagacgatatgtgtgaacctaatagggacccaaaaagaaaagaataataga  
ggaatgaaagaacggaaacaggtgttttaaaaaatacctgagttcacaataatgaaatcttaccggaatcttgaagagcaacaataacaga  
accagctgaagctcagaaattcctagcagattcgacaaaagtcaagcacacgcggaagcaaaaagatgagcagagaaaattccacagcaca  
cgctcagttaccaatcaacgaaactagagacttttctgcctgttctaaggctgttacctgaaaaaaagaaactggaagcaatttttccctgctt  
gccttaataaagagtgttttattcacaagacgttcttctgagaagagctgtattgttaaaggcaggagacaaaatccaacaaaacagctatat  
aacgagaattaagggttttgcacactctatagtggttttgcgtaactcgtaaatgattcggaaacaacagacaatgcaggtcggagcgttaca  
tatatatatattatcagatgggacaggtcgtacgtatatcaaggaccgtcggagaacagcttccggtatcgaatgactttataataataaaaa  
agtctggaagcttctggaagcgaataatgaatcttgcgtagattgatgactagcacgttatgtagagttattgactttaaaagaaaaagat  
acgcgaaatcaaaatcacaggagacaaaacaaaaaaagcgaagtagcaataaaaaataaaaaagaagaacgtaagcttttgc  
aaaaggaacccttgaataagataataatcaacaagactgtattgtttgcaacggaagtaaggcatttatgtatacagcaaatcgacaacct  
gataattcacaatctcgtgtattttgtgtagtaaagtcgtaacgttttaagctcgttccctgattaatcgacgctttgttgattgttg  
ttgattcgatgaccgctatgactctattttctgttattgttgggaaacaatgatctagcaaggaaagaatatacaacaagaattctaa  
tataaaacaaaaatcacagaaaagctcgagaaatctcgttaaaaaataaagcagatcaaggaaatgattttctgcttcttcttaatt  
ctattggaattcatttcttctgtttcggcatttttctaactgattaccaagttattataagagccatgctttctactttctactaaatgctgacccta  
cacgaaacccacttgagaaagcagtcgtaatgccgagtaagctctcataggcgataaaagcttctgtattttcgtatattcggctgattaactc  
ctatacttctgattatgcctatagatataacatggaggataaaatccttttttttctgtagcctcgtcgttctcctctaatcaatccta  
cttatcaagctttggattgggttttctacttaagtcggtacatatcccttctgtctcctcaactcaatccaactacacaacgactcgggaaaaa  
ttcattccaactcgttctgcattttttgggttcttcttcttctatttatttattctattttgtacaagttgactgtccttcttcttctt  
taaattattgtttactgagatcagcttcttcttctcctccttctactattcttcttggttgtttacagtgactatttcc  
acagaaattgcctctgttacttaccgaatccttatctgcttctcttgaatcctattcatcaactcgggcaatttttccattgattatctagcc  
cctcattattatctgctcgggatctgttggcttctccttctgacttcaactttatcacatttctatcgcaaccaattttgttacttttaggta  
gcaacggcgtgtatctcaataaccatttaaaatctttaaaccgtagttttgttaacttttaataatccataattatccctgttctgttat  
aacgcttctcctcctccacgttctcggcaattcattgctaacttttggaaaagccacagaaaaacatcgacttcttatacaattgatttt  
cttcttggctctgcaattgctgtttgttcttcaatcataaataatttgcattgtagcgcgtaagggttttctggttagattcgctaaat

ctttctgttcttcttcttttccattggcgtaatagcttctattcatttttaattgaaacttttttgggtacagaattagtttctttcctctctttcaat  
tcttgatttttagtcttttggattgtattggctgttcatctcagctcttttaggtttattaattatccagttttttaaaatatgaaggttatgcaa  
cgcatcggcgaatgggttgaagaaatggacctcagaattgcccagctccgctcggtcgtggtccgtctcgaaggatgtgggcatcctcgca  
acgtaaaggtagccgttttagtgtgaaattcgtgctgggttaaccacctctgtgctatggccttatatccttgcggttaacgcttcattatgataga  
tactgggtgcttgcgaatgtaccgctccgaccccaatgactgcatagcgataaaaccttgcgaagctgtaacaaaaactttaccgcgacgt  
cgtcacagctactgcggtatctcttgttcttctatgtatgggtttatttgcataatgctgctggaatggctccgggtatgggtttaaagct  
tattttgcctatcaggctggttggttcaatggactggctgctgcttatcgtgaagctcttttggcgtttttgtgaaggcttcatctcaccggct  
tactatcatcggcttctgcaatggtagctcgtgccattcctacttcttaaatgcaacgggtgctggatcggcctatattaaccattattggc  
ttgactcctagtgctggctgggtgctggtggccatttacttccgatcgttggcttgggtgcttccagagatctttcgtctgactatacttg  
taatggccatgaattgcaatcgtcgcgatgtgggtaggtatatttgcgggtgcttaccgctgttctcatgatgtaccgtttcaaggagcag  
tcttgcgtgattgcttctgaccattgccagttggcctcgtagatccaaaattaccatgttcccacactgaaagcggcgattccgacttact  
tttcaaaaaggctgtagcttctgtaaaattaacagcattttggttgcctcaaaactgaaagttactgggtgcaatttgaattgctttaattactt  
ttctctatgctgatattatggatatgactggcttcttactccttaaatgcaacgggtgctggatcggcctatattaaccattattggc  
ccgttgcctatctcgtcgtatgctttagatctcgtacgggtccttttccggagctcaccgctcaccgctttatcagagctggttccggatttctgcc  
ggcggtaaaacaggaattgctggtataatcattggatctgcttctcatatcttttcttctcctatctttccagatctccgatgggccaccg  
gctctacctgggttctggttagtattgatgataaaagttcagcgttataactggagttatctcgggtattccattcctgctttattacgattgct  
ttgatgcctttacttattcaattgcttatggttaattgctggatcatttcatacatcgttttgaatactatcattacatcatcgaaaaagcatccag  
aggcagaattactcctggcgattacgaccagaaggaaccttggactggcgtgctgaagggtggttggctccttgggtcaaactgttctcat  
ggtgaaaagagatttgggaagaccctaatgatcgtaaactgaatgagaataggaatgagaatacaccatctttcacagaaaaga  
atagtgagaaaggactattactatgaaggaagcaactcgtgatgcttctctagatgaaggaatcggtgaaagcgaactatccgggaagct  
cgtcatgatacctacgctggtattgacactgtaaccgatatgctatctaatctactggtgctgcatcctttcaactatgttttctccccg  
gaaaatacaatccttcaaaactgttaattccttttgggtactctaatttttaatatctaataaattttatagtggtatttgaataaaa  
ataggaagttcttattcatctcaaaaaggtaattcattattgcatacaagcgaataaaaaagattaaacgaaaaatgaacatacaaaaaacag  
attaaggcttcagaatatcctcaactgaaagtattgattttactctgaaggagcacatcgtctagcaaaagcagctaccgcttcgcgctctc  
aaaagatcgtccattggcttcatgtaatcaggcacgggagcagagaaatccctgttgttactcaattcatcctcattggcggcgtcgtgaag  
taaaaaaggaatttagcatcatgaggatacttcaacaagcatagtggttcaatagacaaaagtttaagtttaagcttctgataatgaaga  
ctcatggtgccgtctttatccagtagtctatccataattgaaaagcactttgaaaaatatttttatatggtttccaatcctgctaatattactca  
ggcacggatttttctatccgcccaataaccattttcaagcaatagcagttatacgttctttaagtgaatcggcatcggggacttcaaaagttc  
tgaggcaaggggagcaacataaccagctttaatatcattaacaaaaactaaaaggttagagaatatacaaatgagtaagtaccagaatt  
tagtttatcagggaaactggaattttggtaattttgcaatcctcgttcaagtaatagaccaggaagttgaggtggagtgctggattttcctaa  
acatatataaattagctttcaaaaagcaaatagagattcagaatcaaggattccaaggatcagttcgttacttaccttcaaaaccgtttaatcc  
ttccgatctttggagcttagagataggatgattttttcaacttttggctgtgcattatgagaagtaacttttgtgaacaaacaatgctccatc  
agatcgtttcgttaccacggcaatttattcacgacagactccctgatctctgtaagctttgactatgcttagaataaattggttgtgtaattt  
gactaaccttagtagtgaattatccataattcttcttaccaaaatttggatcattagagtaactggacagtaggttatttaattccttgcggctcaa  
ctggccaacgatgaagtctgtaatacacatcgtatacgtctcatattcctcagtaagcttgaagctcagagacgagttttataaaacattg  
gattcaccttgggaattcggatcttttgggacagctgttgcacttttcaacagatgtctctaccatcctggcggtagaaatgcaaaaacaaataa  
aaacaaaaggaacaaaaactaattgctgattctaatactagctatacactcgttttccactcaciaaaggctgaaccaaattagggtgcgatt  
catacaccacaaacagaatgaaaaaccagcctgtagttttccgtttagtattgcttctttgattcaaaaaactatacttctcaagaatcg  
tgaatacaggaccaacaaaccagacaactttcaatcaaacccaggctaaatccttctatagttttcgtttaaacaacgtagaaattctttcta  
agcctaaaatacaataattactttatgtttatcggtaaacagcacctttccacaggacaacgatttctttatttgagaacattttaaatttacg  
agatgcaagacatggaatgctcgcacgaaaaatggctcctataaataaattgaatttcaatagcttttaaaagcttctttcttctgattatttc  
ttttgatccatattcctatgaatacactttattttcattcacatatatacaagcatatataataagaagggtattagtagcatatctatgttga  
ttatgtataatgatgacttatacaatgaacatgtaaagtaagcatataatagcctatagtagaaaagcattttttatataatcatatattgga  
ttcatggttgaatgctgtgaagaaatgaaagcagcagtatacctgaaaggtagcttaagccattgaatcgtacaattaatagttggattttgt  
tacagatgcttcttagtggcttataacattcaatagcttctcgcctcttctgttttggccttgtacttgaattgaaatggatgaaaaggttga  
agggtgatcctccagcttttaagatgtctcgtcagattcattattacgttcttcttcaagggtcttggatcttgcattttttcaaaagtatttctc  
gaggttaactttcgttgaatcagtaacgattcgttcacgagctcctcaagcatatgcatattcatcattttgaaattctgaggagcacg  
atcctgttcataagtagggaatcgggtccgtcttgcctatgcaacgatgccttcaagagaactgtcttgaagatacgtttaaagcaccagctcccag

actccaagtaccgttctgggagacttcagctggtaagaacgcttctgtgattacggtttatgctggcatcatcgtttccattctgtcgtttttttat  
atgtacgctatgccaatatttcttacaacacattgtatattattatcttttctggcttctttaccctctttcagagccttattatcaaatttg  
cattggagaagacaattctcccactgcctccgagggtctaggaattttccaatacagtaacctcattcttaattcttttttctcaaagt  
gaaaatctttccgttctcccgttctgttaggaacgcttaggaatcattgtaattttatcactttatactcagttgctaatagaaagtcactattca  
ttatacctcgaagagttttacatgaagggaaattggtttattgggaggattcttttctccgtgcatcttctcatatgtttcatcttctgcttaagcat  
ctaatacagaaagggcacaataatgattgcatggatgctacacctcggtagaacggccttatgcgttagcctcgaattatggatcttaata  
gccagaattgttttctccattggaggagcattctcgaattgtgtttgcacagttgacgcattcacctgagaacaagatcgcaagaaagcgact  
gttcttcttctggattctaaagttatatttctatctaactatgttcatcatattcggatataattattcaaatattgtttattattcggcgtggaag  
aaatgggcttcagacgaaagcgctagtgttttatcttggtatgattttacattccctttatggctgcgaacgggttttggaggcttttttctatcta  
cagccagttcttctcagttattaagttaggttagatgctttttcttaccatctgtattttgctagtgaggaaagtcttttggattggtatcttta  
ggagctcgtggactgttttggccaacatctcaaatctttaaactcgtatcttattcgttattcattttgttcataaaaatttcttccctcaaatctct  
gagtcgttccagggtgtttatcagctttagctggttttttccagccatcagcagaaccttcttcatcaattgaaatacataaacttagattg  
cttttgttatagcatccgcacctacattggcgattttatgccgtcactatactacgctagacaaagatattctatgcttattatgcaagacta  
aaaaaacctcataaagactaattaatttctattgtcgataactaaaagaatatttcaataaacaattcctattgtacatacttctatggggccttaa  
atcaaaaaaagaaagggaaaagaaaagaaaggtctcaaatgttaccagtagccatcattaaaatcgcaagaacggttgaatttgaaga  
tgttctttacatgttcaatactgcaagtttgcggtggaatataccagcagcaagagcccatcacaatcggtttcctaaatactgtctgaaatg  
ttcagaacgcctgcaccgctagaagcaataacgggaatgttgacggatccctaacgagacggactagtctatgtcatatccagcatttgaac  
catcttgatccatgcagttcaaaaggacttcaccagctcccatagcttgcgatgccttagctaattcaacaacatccatcacgatattccctcc  
accctttacggtagattgataccaagcatattcttctccgtttggaccaagatggggagttttgatggcatgatgcttggctcatcagggcttttga  
catactggcgcttaggatcaatgaaataacaacagcctgacaacctgatgcagcagaatggctcgtatagcggtggttcgagtcagttttgg  
tcattagcataatattgtcagcagcatatacagcatcactgccgatggacacctgtcggcacccgaacgaaataagtgctgctacttcaaca  
gcggaatgactgtaccatcaggatcaatgatttcagggataccaccaccaacagtcacaaggaacgaaaacggtttagcagccttagcgagca  
cttgaagcataggagcatctactaacggacaattgcgaaatgaggtgatatttaagaaaacaacttcatcggcaccttctcaaaaatagcgttga  
catagttcaacaggttttccgaggtttcgaacttcgccaccagcattagcttctcgcgaacgtcgtattgatcaccttggtaacaacagagatgcc  
agcatcgttcgaacggacatcaagacaagcaatgacacgcttctcaaacctccggcagcgttttctagcaattgagtgccactaatggg  
ctttcataaattccagataagaaagcttgatacagcgtaaaccagcagcaccactttttccgggtgaaattgtgtagcaaggaaattttctca  
taatagcaccacaaacatttcatcaccgtagcgagttgtagccatgaaaatcactaggaagctgcaaattcgtagcgggaaatcatgtagga  
atggacaaagtagaattgtcatggggttttaagccgtatattcttttgggtattggaacgaacagcagcaggaattccatccaatgtgagggac  
agtcttctcttctattaaacttctgcaccataccagggaaaataccaagaccctgtattcaggtgcttctaccgaacctcgaataaagcttga  
ataccgacacatacagccataaacaacttccagagagcgcataatttgcgaacggttcaagatatccttctttgctagagattcgaacaaag  
ccaaaattaccacgccaaggaaaatacagcactgacacaatgtagtaacacgtccgtgatactgaagtcgagcttttcatcatttctgatggt  
tcattcccgtttaacggcatcaatcttacttctcttccaacattcatggacgaactagcaattctcattagcctttccatacctcagctttctca  
atctcgtcgggatttgaatcaatctacttctgtatccaagtgttgaatagcattgactaaagagcgtacgtttccgctccataatcgagaatag  
agacaacatgggttaggataatgcagacgcgtcctttagcttgttatgcatctgagatagtggtgtatcttaagcttattatataactataacg  
tattactttgggtattgttattcgggttctgttctgtaggacatgttcaagtgcatacaggtcttctgtagccataaattttggataatgaagtttgt  
gtatcgttgtttaaattagtggttatactcagttacgcaattgaaacagagggttgaatgaaaaaagaacgtaagactcctataacagcaaaa  
ggtatataaccttctgtgataaacaacagtggtgaaacaatggaaggaaatgctgattaatcgagaaatcaacattggaatggggcttctt  
gtataggatggaatttcttaagaacaaataaaaaatgtagaaaatgattcttctgtagcaattttcgggtacttctatgacttgaatccata  
cattttgaaagttgcagacagaaactatgtatattgattgcaatgaaacaattgataggtttgaaatggaagaaacttaagcgatgctatt  
ccagtcfaatggaatgtttcattcaatagacgaagaatgtagatctgtttgaaggatatcattgctggtacatgtaagcaaaaacaaaca  
aaataaaaaagctgctgttctattgttactaaaggagctgagctatcttattctaaaagttcgatttcttatttctcaagtttttctgacttta  
ctgggtccaggtaaacacaaatccacggaatgaaatgaggcaaacgcttcccttttggctagggctgctaaacgttcaagagatgctttctgta  
aacaatccaaaattgataactatcgatctagagcttcaaaattgctcgaagatgagaattatgaataattctgttgaacaagaacttaactaatt  
cttgaagctaaacaaaagcacagattcttaaaaaatggatttcgtgtcattgatttggtaggaacggtttgaaggatacttctgggttggttact  
gactatgtataggggttccgctccaggctcctggtctcaagtagcctcaggggctgtaggttctgaagggttgggttggcagtagacattcaaatg  
tagcaccgcccaaggagctcctccgggtgacggtgacatgctggaacctcaaacacgtgccaaaatacaagatgcttccatcaacatcgacag  
caatcaaggctgatgattgactgtagatacagttttgagtgatattgattgccaatgattagtcgcttctacctaactcttctgtaggctt  
cattcagctacaggcatacgcattcgagatcatgccgatccatggtacgaaaatatcaagtaaaagcagctccagatctacaattaacaaatt

aggatttatgtaactccgcatttcaattagccaaaacctttctctgctctgggggtttttgtttgcaaatattatagggatctgaagagcaagagt  
ttcagaagtctctaataagattttaaacgcgtccacgtagaaaagccaaaagcatctataaaagaatctagagaagcatattttgatgtttgg  
gacggaaatagtagcagccgcttcttgagtacatcttttattcttaatacgcagctatagcttctggtactccaacaaaacatatcaatgat  
gcatttacaaattatacaacataaaaacatgatattattacctacacctcctttgtttaaatacactggaaacgtccaatcaccagagctcatcg  
cccgcgatgaggctcttagctttgatttcttttctgctgtgcttttaaacgctcttgcatcttgcctcgaagccttgcaagtgccttttgatg  
ctcgatgctgttacgtgtactttctctccccttgagattgattctggctattccttgaaggtcttctacagaatgttcaatcgaaggattgaa  
ctttctgcttatcgtgtagtgactccatgttgttttagggatgggagtagttgttcaaacatggttgtgctaatgtccggcctaccgctagatgta  
cctgtaaccggcactcttgatcattagtagatagattggtcagaagaagcactttactattgtgtagcccgaaccgacatctttctccttatgatt  
tcatgataaaccttcttattaccgtttgctaagatgttcttattattcagagaagtcggagctcttatttttattccttaggtctgtagcaga  
cagtgcagtcgattggaaattggagtagaagattgaatacattttgattgacaggttcagtgcgattccaagggttaaagaggaagaagatt  
atatgatgcttattgccattcccttcttagcatcattgtttgtaaatacttcttgagtggtctcgggtaattgaaagcagagattcagagaa  
ttcttccaaaattagtgaaatctcagattcagttgagcttcaactaagctcgttaaagctccttaccattctcctttattgatgggttcttcaactgaa  
ccagatattcccgctctgttgacaataggttctggtgatcaactgtgcattcgaattctctctgtgagaggatttgattgaaaggagtcgaatg  
gacagggaaattcggtaacgaaggagaagaagcgcattcggaggtccaacaaaaagggtcgtgctagcatttcgttcatagtgactcaat  
ttatcttgaagtgtgtagcatagattcaatactttcaagccgttgaacagaaccaatgagtcggaattcgtatctgcagcagtttccggagagg  
aggtagggaaaggaggatccgtttgttggaggatcatggaaatgaaaaggagatggagaagaacgggaaggaaatcctggatcgaatggaa  
gattcggaggcacggaaagaagaagatggcaagggttgcggtgtaatgaaatcgagaacgtgaaggtagatcatttatagggttaa  
aaggagcatcgaagaagcgtcattattgagatcaagatgaacaggctgtttggtgagacaactctgactggacttaccgttccgagtg  
tttctgtttagggttcgaccattcgcaccgttttctgggagactttcaccgcatattgcctctttcttctagaaggatgattaggaggagg  
gataaattgtatatcagacttctctgctgtgagttctatcttctgttcttagcagctagccgatggctcgttcagctgttgttttccactcaaat  
attcatttttagcattctccagaattgctaaattgggtccacaatccagcagaagtcggattacctggattcatctcattgtatgtcttcaacctca  
atccttacaatttgctgttcttgatattctgcacgttcaataaacaacccatataataaaattctttcaaaaactacaaatgatgagaa  
cttttcaacagtttgccttcttaagttcgtttgttggaaaaggcatgtagcttagtgccggaataggcctcagcatgggtctgaagagtcgag  
agaaaagtattttacacttcaattcttgaatcaatagaggttacttaaacattgtgtaggcatttttcttttcttagcagggttcaaaa  
tgcttattcaacgagcatttcaagcctttgcaaaaaccaagaagatggaaaataaaaaacttttctagcaagaagaatcttccatgaa  
cggatacattctcatttgattgacagtcgatttttaattataactatccataaaccttgaacactctttgtgtcaaaaaggatccctct  
ttgtcaaaaagctttccatattatttcaagaaaacataattcaagaagaagaacataaattgtctctcagtaatctccctgcaaaaaaa  
aaatgccactgtagggttactggtctgtatgtagtggtgaaggacactttagtagaatttttagttacagaacttggttcaaacctattgagcg  
agtatacaaggcggatgaacgaaccgacattgtttacaaaatcgacaataaataactagtaggagtcattgtcctaatagactatgtaaccag  
cattggcgaagccgtttgcatataatggaattccttactcaacttctaatgggactttaaacgacccttttcttctgtttacgttgatgctc  
ctgttcttactcgttctgctggtacacaaggtaagtggtgtcttttccctaaagtaactgttactgtattattaacaggtcttattgtgagttatt  
cccgcgaacaaacaggttcttgagactgacaacgacttccatctgcaggtagaagcgaagcgaactccacaagcttgaagagtagctt  
ccattctgctccatacctgattgttcttgaaaataacttctatagcttagttaccctcatttaaaaaataactctcagcaatttgtgcat  
tcaagatgaagcagcctcaagagcgataatagcgtcaatcgtcagcggctctcggctcatgtccatatacaaacgacgctttgacaacccat  
cttatgggataaattaagatgcgcagatgtaatacaaatgacagattccgacctctgggatagttactttatgcagatggcgggttagctgct  
atgagaagcaactgcatgaagcggcgttggctgttcttctgtgataatcgattattgtaccggttataatggaaccctagagggatta  
aaaactgtaatgacggcggctgcccctgttgaactctgctcagcttctgtgactgactacatacgtcctgtgtcttcacgcagaggaatgc  
tctattagaagctggacgtgaacgtattggatccaatggtattctgtattgtgacacgtacgtatattgaaatctactaccatttttaactctagtt  
aaagatgtccctgctaaactgctcgggtgaaaattgctcaagttggcattagcgaaggtttgtgactgcaagatataaataactaattcgaataca  
catagttgtttacagcatgtcttacagatggataccacagcgcacgatacttgaaaagggtggtgtccgtttacgacagttgtgccgccgag  
aacaatgtctttgatgctttgcttgaagagctagtcgagtcatttcttaagtcatttaacagattcatcttctgtatcaaacgatctatcaat  
ctttaagcttttcaatcgttacaatttttaataaaatagatatccccaaaaataactgtttccattttaaatctatatgtaaccaatggtagtt  
atgtatttcattaattgatgaggcaaggagatcttgaagaaccttaaccatcagcacgggataccaattgacctcatcactctttcttcaaaa  
ccatccttttatactacagcattttgtcaattcgtcctgtcctaggataatggcgaaggtagaccctacctgtcagctgcatcaaatgctg  
tctgggttaggcttagctttatacaaaaattcagctttaaattccattcttcaaaagatcattgcaaatctgcatacgtccttttaagaatccagcca  
ttccttaccaccaccgaaagcattgcaaaaacatcgaactcgttggcacaatctcctcgtcagggattctggatctcaaaaatagaaaaattctt  
tccaaacctaagctaataccgacacaaggaactggctgttcttcttagcagcaaacataccaacaaggtgtcgttagcaccaccagcagcaat  
agaaccgacaccgatgctatcatcattggaacgatcagcttctggatctcagaggactcttttcagttgagctcttcacctttggagctgatgctt

ccgtaacagcctcgtaaataatgccgtataagtagtcaagaccacgagccagagacatgtcgaaggaaaacttatccaaaataccaaagcttc  
aagatagtcaaaaagtaaatccatattcttaaatgacgacttgcggaggagctgtagacaagagagaatcgcttcttaattttccagcaaag  
agcgatcaccttaagcaaacgtattcactaattttatcagcgaccttccgaaagtcctttcaacgacctttcacgcttaacttctccaa  
ggaagcttgtcaagcttgtcaacagcactggaaatagtaggaccttgcagaaggaacaccacaacggcgaagatgccgtccagaattggc  
gatgattaattttgatagatatttaccacttcaaagcatctaaacttctactaagactttgagagcctcagagtcgggaatcatgggatcgaa  
agagccagcaatatcgaaatcacattgatagaattcacgcatcgcccttggatagccgggtgatctctccgataaactttgcaatgtgata  
gcgcttaatgttggttaccttaggattcatagccaaccaagcagcaaaaggacagctcaaatcatagcgcaaagagcaaaagttaccaccttgc  
ctttaaagatcataaatcaattgtctgtcttccgactttccggcaaggatttcttaattcaaagactgggtgtctaaagttacaccgcatggc  
gcttaaagatagcgtaacgggtttgaagatagctcacgcaaaacaacgcttctgtctaccaatccttctttaggcgtctttaaagtga  
agaattgtcttcttcttctgaaccagattcgcaaccttgagggttttaagtctaaaagttttctaccttctgcaatcttttaggggctc  
cttggcttttagagttctaactacatttcttgagccgaaaccttctgtaatgcttgaccgacagttgtcatcttctgctcaagttttaatgac  
cggcagaatgttgtagtttggtggaacaagtgtctgtgaaggtagcatagatgagaagttattctgctaataagaatttttaactactacc  
ataaaaaagctgataacattataagtttttaagtagttgacgtggttttaagaattgccgtaaaaggacttggttaagaaaagtaggagaa  
atcacagaccttgagcagacctgaaactattactatgaaaaagcttgaagtggaatgtagagatctatagtttaccattgtagtgt  
cttattgaataataatcgccctctatggctttatgggtttcatgcatatgtaactggattcaaaattcggatcaatcaatgagtaaagtatctt  
ataatcaatgtcagaagattatatacctaagtctaaatgtaaatcatgacaaaaccataaccgcttggctttagcttctgcatattttctcagag  
tcaattccaccaggtaccttgggacagcagatagttgtagatataataatttaggtaaccatcaccttaccgaaatcgaaggtcttcaaaaacag  
ttattatccaaaacggtcacggcttgaacacatcaaacgaagctagatacttgttaataaaaactcaaatagcttagtctgactgactaga  
gaaaaacgtaaacatacgcgattagcaaggattagggaaatcttgatcaaaagcttgcattttcaaaaacttgcgaaagaagccttggaa  
gtctttaggataagaatcagaagcatagtaataagtaagctgcttaatatcactatacttggatttcaagcagctagaaggaagcgaata  
aaaggaaaaaagtcgtaaatccttttgggttttaggacttccacaacataactcaaatgacaggacctttagaaacttctcattgcccaggaa  
ccagtgttacttgcggttctaaagtagtgagccaattcaaaccttctaaatagcgagacaataaagattgaaactgggtaacatcacgctt  
tccataggacgcaatccaggagtagctttcagagggtaaatgatatttagcatttctttagtaggagcttcaaatggaagaggagcga  
gcaaatctcacaacttctccagttcaagctcggtgcatgtaacggcacacactaactggactgggaattaagataccggcagataaacag  
cttgcacaacatcagtgagatggcatctacgggtaacttcttaataatagaggcgaagacgttactacgagcttttgaatacacaaaa  
agttgacttgcgcaacttcaaaagattgtcagcagcggatcactaaaggcactgcagagatgaatgcaactaactgtttgaagctttaa  
ctgaacaccaacgtgcaaatcttgcacatagcctggtgacattaaagcccactcaagaacttgcagaataagcaaatcgaacatcgccgaa  
gagcttccacgtagtttccgttaaaagttcataaacctcgcaactatatacgtgtcatctgtagtaataactctctactaggcaagtattatgt  
atgatgtaaaccttcaactctggtgcatcttcaaatcatagttgtccattcaaaccttcaataagcagatagggctccttggaaacatattaat  
gtccgtatttgggtcaataggccttgcagcttgcattcatctgtttattcgagctgcattagcttctgatttcttcttactatctgtagaat  
catacacaatttgggaacaggtgagcttccaaaacttaaatcatatacgtcttagctggagttcagttcttcttactaaagaacgaagt  
gctaaacggctcaaaagttcgcaatccgacctcgagtaactgcttctggtttttctcccctgactatttctattatcatttttgcattctga  
ccgaaattgtctaaagttgcgatattctggcttttagttgtaggggtgcatgaacacactgtagacaaaccagcagcatgtagaaagtacgtgg  
ataagacgttttcagataaaattttctttttatactcttcttaattctatttttagagaaatctttaaagaaatcgaaggaaaagcatg  
gtaaacaaagcctgagtcggttctggtctacatccattgctcagctcatctacgaaaaaagcattaaagggttaccgttctactcgaag  
ctatagccttgattacttaggatgaggactgtgctcactatgtttgtgaaacaatgttcgatgagatttccattttctagtgactcgaagagat  
ggattgaatagaattgcaaatgtgtttatatttcttaattgataatggttctgctaaaagaaatggcttagctggaagtattcgcagaaatctgg  
gtttgtttacattgaaaatactcaaaaatgtctcccttcttcttcaagagcattttattttggagaggttggaagaaagcgaag  
caagaggaaagagctatctactttgtatctattttcaactagtagttttcagcgaagtaaaaacgggttggaattagtcgaaatggagag  
ccaagcagacaattttctggagaagctgatttgaacaagaagatctgcatgttattagattgtaagtaagggttctcattttgtactaactt  
gagacttgggtatagatgattggactctcaatttcagtagccatgcttattttgctttgattatcggttagaagatatattgattgaaacataaaaa  
atatcgaactttccgggcagattgtgttgcattctacgatgaagaagataatgaagccgacttctataatccctgctactgaatctacg  
attacttctctgctacttctacttcaagagaacgaagagctactgggaacttctggagagcgcgagggattgtatgctgttttaactcctc  
acggcttctgacacagagcctaaccatattcccttctgtacaatacaagtagcaggcttgcctcatcaaagaatggaaatagagaagttgc  
agtcacccgaattttctatcacaaccttggagttggacgttgaacggcgtcgatatttaccatctatctgaacctgccgattcacgtctc  
caaacgatccaacgattttctgatagaagatcttcttctcaaaaataaccacttctcagagcttccatacgtctgcatctacgctacacctt  
attctattctctctcttactgttacggcactatcaatacacctccgcttgagtagtagtattttcgaatgctagtagttagctgtagtagca  
tttctgttttgcggtttcttctacagggctcatggttcccttttttgggttacgattactatgccacagatttactaataatattcttct

ttcattatTTTTcTTTcatccacctgCGaattgaattacctattccatcgcttTcTtaaactttactcaccaagtccattgtttatataagtcgct  
actcgctccttctcatctggataaaaccaacatctacctgtacttaaattgatcattatcttatttaaaccattttactTTaaacaaatataataa  
tatctaacaattgtgaattaaaccaagaatgctggcatctaaatgaacatgtctactattcaatgctcaaaaaagaagtgaaaatcct  
ttgaagacgttcgttttacagatagcttaaacaagatcaccaagtgatgtgaactctgactcttaacctctcattttaagtctcttcgacgcg  
atgctaccatgaatcggattatcgaacaggaatgaatagcattaggaaggtgtactcgaatctctttagaagaatttatcatattctcaaagc  
gtagacagctattcagcgttttatatgaggatTTgtcgtgcttgaataatcggttactgttacaggaggctatcgactatgtttcaatggacact  
tatgcattgcgatagctcttttagatcgctgctattctatcaaacctctattccttctaaagcttcaagatataatgcaattgggactttttatcgc  
ctgtaaactcacaagtgactttacggttggaagtgtatccaaaattatccttttctcctttctataaactaattgagttcgtgaacagcaaagaa  
aagtttctgtaaacaactcgaccaagtttatctatacgtgagctagaggtagctctatgctttcgggcaatcccgactaattagttaaaagaata  
cgaaaaaatagtactgtcgttctgacttatgacattatgtcctatctctccgctcgatcctaccttactcctctgattttccagcattcgtttt  
tcaaaactcttcagaagaggattctgagcagcttatgtgagtggtgagcagctacatgctggttgaataatgaagggtatgtgtatatacagataac  
aacttcatttaaccaatgtacagattgtcgattcactgcttttagccgagtgaaattttgtgcctctctgtggatactccttaatgccatgtggcc  
ttctcgattgttattacacctTTTTtattatgacttctatggacattgaaggtgacaaggaaatgaattaaacttaaacgTTTTaatgac  
tgattgaactcatatttaaaaagttacctctctctctgaggttaaataatcacacctataaacttaatctacacctgcttattgtttgggatt  
gtcagtcagtaaaatcctctgcatcgtttaatcagcgttataatctaataataaataatataattccaacaagaccagctttgtttcagccat  
atgtgacctaactttgtactttttacagccaattgtttatctaagaaagccccaaaatttcaccgctcatcagttaaagtctataattaaataagca  
ggagccgtaggtaaacaggaatgggtttgattttagcagttaaaggatagatgaatccagctcctgattcaaacgcatatcacgaatgggtac  
agtaaactctttggaacgttcagcaatttaggatcatgtgacagtgagtactgagcttagccatacagatgggcaaatgctcgtatccttggcgt  
ttataatccttcatagctttttccgcaacagactaaactcaattccttttagcaccgtacatctccttgcgaattgttgaatTTtatcttcatgataag  
cattggaatcataaaggaatttaaaatcactTTTTgggacgtcgagcaagcttctacggttcagccaagctaattggctcctggccgctt  
gctaaattggaagaaggaatgatcaatggctccagcattaacagcatgttcgcaatgatctgatattccttagcagtatcagtttaagct  
attgattgccaccactggaacgttaatttctgagagtctgtatattgtaaccatattcgacagcctttgctaaagatccagattctcta  
aaaggtattcatcaggcaaggggtaccaggcttaagttttgtccaccgcatgaagcttaagagctttgactgtagtactaaaaccacagcac  
tgggctttaatcctgagcttctacactgtatgaaaaatttctccataccatgtcagaagcgaaccagcctcagtgacaacataaccagcctt  
atcagcattttcaaaagactctgtccagctagttaagcgcaattttgtcagcagatagtagaagaagcgccaatactgatgtttgcaaaaggtcc  
tgcatgcacaaagcaggtgtacctcaagtttgcataaggtaggttaatagcatcctttaaacaacagccatagcaccggctacaccaa  
gatctccagcagttatcggattgccgtttttgtcattagcaattaccatattgtcaagcagatgtctcatatccttcaaatcattgaaagagccaaa  
attgacatgactcactggcaacggaaatgtcgaaggacgtctttcactgctccctttcggtaggggtagtctccttcaatggttctcaaga  
aacgatcattaacatctagaacagattgcaggcaatgatttctaggtcagatttaagcgaacaaatttctcaaaacatcttggctggcattatc  
gatttcggttaggatcatgctttaaataatcacaattctttccatcttggaaagcaaaccttttaggaataacacgatgaccattttaaaaggtaac  
attctcttaattagagctcgtcactttgagtactttcatgaaacattctggtttcaagagcagcgaactaaaagattattggcagctgtaacggcat  
gaatatcaccagtcatatgcaagttaaaatcatccataggaacaaattgagcatatccaccgacagctgctccacccttaacgcaaacggttagga  
ccttgggaggggtgacgaacacaagcgatacccaatttacctaattgaccaagagcttgaaccaatctgctactaccgactctttccctacca  
aaaggtgtaggagtgataccactaacaacaatatagtttaccatctttcgggtctcaaccgctcgtataattcaagtaacattttgctttagtg  
accataggtttcaatttccgttcatggatccccatttctcgccacagctcgtgattttcttagtcttgagacttggtatttcaatctgaagga  
acgggctcttcaagtgacttattgatggaaacctttagcaaaatgctttgttccgaaagctcagctgcctgacgggtttcgcattaacat  
tgcaacagtcatagggcaaacctccgggaacaggagtgatgtgaccagcaactgagacacagaaggataatgaacatcacctaccaattc  
gcgcttgcactacgttgatagcattttccaacatccagcaactgcgctggttaaccattctccaagcaaacactctggtttgcttaag  
cagcaaccaagatgtccgctttgcaattgctctggttaagttttctgatgagaatgacagacggtaacggtagcgtttcttgcaagtaagta  
gctgacaggggtcccagcagatgtcgttctccaaggataacagcattttaccagcaatgggaatgttgatgatggagcaattccataactcc  
catgggagtgcaaggaacatgaatgggtgtagatgtttttcgaagcatacctatgtttactgcacaaaaccatcgacgtctttttagctaaa  
atggattcagtgatggattttcattaagatgacgaggaagtgtaattgaacgagaattccatggacactcaggtcatcatttaactttcgtactt  
ctcgaacagagtagattggcttatagtgtaggaaatgcaaatgctttagtaataaccgactttcttagctccttttcttcatgcaacatat  
acgttggaaatcttctcttctcacttgaacaataacgaggggaaggatgataattttcatccttccgtttaattgttcaacctctcagcaacagag  
ttctgtatctttctacgagaaaggattaactacatcgaacaaatataagtaataacaaaaggaggtacagaatatcgggcgcaatcatagga  
caataaaggaatcgtaactgcaatgatccaatatcattgataagtcgattcatccaattcaaaagttccatttcaagtcaactcaatttctt  
tctctcatgaagttgaaacacttacctggacagaaactttccatcaaggattgttgctgatgtcaaaatcgctgaattgttaacaaccgtacatt  
gctgttctttgattgaaactgcatcttcagagcagcactactccgaaaaaaccttgaaaaaatcattttgcttaaaaaggccaaccaaccaa

aaataagtgtccggttgaaatagatccaaatacatctatgacggttgacaagcattatataattaacatcataactaattatgctatttcattga  
gttaaggagataataaaagaccttaaagaataaattagcaaaacaaaaagagatttgaaagtgatgacctgactttttggttcttctaact  
tatagtaatcaactctttgagtggtgttcaattgaacttaacaatcattcattgtttcatagatattttcccgcaatttatagctacaggttaggc  
ataaaagcgtacatgtcctaatttaagtagctgtaccaattattatggctatcctcctaaattcctcccaaaagaatgtcccgttcatttaaattttc  
aaaaaaagccttagtaaagccgagagtgcagatccacgcgtaaaacatactaaaagagagaaaaataatcaattctacactcgttcatcca  
atcaattaacttctataaccactctataacagctaacaaccattctacgcgaaattacgcgtttatataatgcgattgtttatataaaagggtattgta  
aaggaagaagttgcctcatgcatcgtttatttgggttgaaattaagtaacaatgtcctttcattgaagagcataatctcgtctctcctttaccatc  
tatcatcagaaatcgcttttaaaggtagtgtttctagaaagaatcacttgaacattactatttcagggtgattgattgttaaattagtttagatg  
tagcgtggttcgaaacgcgacttgagtagtcatcacaatattttagtctttgattgtttgcacatccttaagatattaacataattattgtc  
cactacttctattttgtaaccttctttttactttcctaaagaagacgaaaaagaacttttttacctttattgtctaccctattaatgctcaa  
attgaaaaataatgtcagaatgaagttattgacctttcgaactctcgggctgtaactctggctcgcattttaccagaagagttatctgtaa  
accgagaatgcctgtttccatctttgcaggcgttaaccgctaaaaatcccagcgaatcgaggtgattggggcgtgaagcggaaattcccaa  
ttttaataccgttatataccgttgatcaattgatactcctgaacatcaatgctctttccgcgtgcgaccgtttgtgcggacgttgaaacgcat  
acatgatttaaacctcccagttacgaaaaggaaggtgaagattatgataattgtcctaaattttcgttctcaaaagtttccatacagcaacgctt  
atcttgcctcaaaaaccaatcttcagcgtggtgctctatagctaatattcaattattggactctcgtccaaacaagaagccacgcttcaaggaa  
gaatacatttatctactaagaactaccattaccgtttctttaggaaggtccaccgctcctcaaaaggaacttatgtttggagtagctggatca  
tcaacttctggtaccacgaaagatcttcatcccagtgatagtcctttatgttcaatctctaagtcagataaaaaatggtcggataatacacaat  
ttaattaggaaaaataagttacttcgagcggattgtttgaattccatataatttctttgtcaaaaaagctgacttaagcgtcattgatgaatcgc  
cttcttcttgaatgcttcttctcatagctccttctgaggttgaactcctgattgctccttcaataccggttgttacaatgcccttcaaaagt  
tcgctgacctggagtttgagcttcatattggacgctgattcagatgctgcaaccttcttttaatttcatgctttacaatcccatctttacatcg  
aatactaaagggatcaattttgtttgattcaataatgtaactgctgactggttcttccactattcatgtttgattaatagttcaaaattct  
gtaaatgtatgtgcttgaatatgcgaatgccttctgtaattaacctaatttcatcttgatgaaaataaacttaaccaaatcctaaagctat  
ttacgagatatgtatgaactttactcgtataatattagcaacattctgttcttcatctataaataaatcagggcactgaagttgaagcgtact  
gtaatcgtacaatcctactgagtagctatagtgacctggtcaatagtgctcctcgtcgggaattctcccattctgattctgtaaggaaaa  
aattttacgattgttttaatacaaaatttttaaagtctgagcttctgagctagaggcattctacgagctgattccaagacaagtctgccact  
aaacggttggatgcaatgaaaaaataatagcaaatatgcaatgggatatgatagacttctctttgtgctgttatcttctgtatggagacca  
gcaatgtcgattgaagaaattgtgtatctttattgaaaagtttgcaaggttgtactcattcaatttcttttactataataacaggttggatcct  
tcagaagcaaaaaaggcaattccagtttgcttaaggaagctattttgtcattgtatcataaaacggaaaactaacctcaatcgtaggggtct  
actctcaaatccagttactgtagcttctttaaagacttaactcaattcatataaaaaacttctgggtgcttcttctgatccaattatcgatt  
actcgtatgatcgtatcttatgtgcgcaaaacagccgttatgggagtcgagaggttattcttatgaccgaaagatagttgagcttcaggctta  
atgaaaaataaaaagagatgctaaatgatgagctgctatcgtaaagtggggcgttctgcctttgctaacatgaataggtgttgccaatgctt  
agctgtccttattccatcgttcaatcctcagatgcttcaacttacactactaaagatgttcatcgaaaataattgattgtttgagtaattgctc  
agagtaaggtctgcttataatccttatataaacagttaaacatagatggctgcaactatttttgcattcttataatgctatgttccacaaaag  
cctggagaagccgaaaacttgcgaacggatcaccttggctcagcatggaacacggcagtgatggtgggctatcaagctgacttta  
ctttattaattatagcgtatgattactcgttaaagatcatcttacaaggtgttccaccttggtaactatgctagctagaaaatctcaccga  
ctcagtatgttctttacgtaacgtggaattaactggacgcataaccagagatcttcagactgattacatttttcttctgctattttgatgacc  
tgcgtacgttaagctgaaaaattcagtatattggcgaactagcaaatgaggaaaatcttgacataattttccagaattatggaatcgcctc  
ggaggtcgacgtggagttatcaagaaagctgttagatataaggtcatttggctgtacagattgaaagccgtgcagatgactgttgattgtctt  
gttgaattaattgacactaagataacctacgtggtacaagaggctgcaatcatcattaggatataatgagaaagatcctaatacgtataagca  
cctactttctattttactgaaaaatagagttccttgatgagccagaagcaaaagcagcttttatatggctacttggctactatgctgagtcagttg  
aaaactcatgctctttgatggaggtagctcgtatggattctatacgaaccttgaattacagctgacgatcttaacggcgttaccaaaactatt  
ttgaaagctgcctgctcaggttcagaaatggttactaaaatgttcagctgtgattgaagagattcaagatccggttgcgaccgaggtcatt  
atatactctcgtatgttatcaactaatccggagcttgaaggaaggtgatttaacgaatgcaccttctgttgatgtgaaagccggcacttatgatc  
cagacacgacggagcagctttgttaaactgttactcttcatctgtttaccataaacgcctaatcggttgcaggggttcttccctcagat  
ctggaacagagtcctgttctcggcagcaagcaatttagctgcaattctacaggagatctggagatggaatacaacttacgtcatcgagcac  
tatagatggaactacgcaacgaaaagtgaaatcgtatgtaattctgttgactatggagtcacaccccttaagtgaaaatggaccacacca  
caaaactgaaatgtatccaatatacagttcttggccgaattgaaaatcaagatgagcctatgatttctaaagattaatgaactaataatgcgcat  
taaaactgtgccaaatattacaaaatagaaaacaataatgtttcatagtcacagctcacaaggtgacataatttgtaagttcagcagatggaa

gctacattattcataacttactgaatggtaaagaagaattacaagcttaatcaagctacatcagaaaatcaatgacatctttttatatttaa  
aaaaagtaatcaagaaaattagatccgtaggaagccagtttttggttaatagaagaagcagacttggcagcagcaaccttttgctggctaa  
cttagcttgatagaaagcagcactcttgacctttctcgcttctccaatttgagacaacgtcagagtactccagccaacctcagaggagagacg  
accaacagtgcagacttacggccaggcttaaggcgtaaagacacgaagggcagcagggcagacaacagccttttgcttatcgaagggaggagg  
aacacctcaacagcttgaagtgccaaggcagcttgaccacggggactcttgggggaagcataccgcaacagccttttgaaaatgcga  
gagggagcacggaagtggaaagcaccacgagtaggggttaacggcaagacttgcgcaagtaggcgaggacttgagcttgttacggaagaa  
gctgccagagatgttaactctcacaacggacaacgacgacttttgaccgacaaaagtgttagcaacaacagaagctaaacggcccatga  
gatggctataaagaacaattagtgactttcattcaactaaaaaaaaaagaaattataaacaacataccccttggcatcaatgacaactactt  
ttgaaactcgacatgtttctgctgtctacagacaacattgcagacgcgttggtttgtttgattcccgtgactgtttctgagacccaaagttg  
tcttcgctgaatataagcttcaaaataacgagaagggggcagcgttaagatttacgaaagaaaaggaagcagggaaaacagatggtttct  
tagcgtttgtggagaatagattcaatataagtaaatgtagaagacttttttaaaaaaaagggcattacttctgattttgaaataacgaa  
tgcaactgagattccgtaataaacaacttgcgtattccggttcttaaatcctatctttttattggaacttcaggatgaagaaacagaag  
atctatcaaaatcaaacacccaaaaggtgcgcataggctaatgcgttctgctggttttctcaagtactgtgtcaatacaaaaacctgaagaa  
cagtttagataccaaatgtgcgttgcgattccgtatcttaattttgtagtatatggaatcccagcaagaaccaagatttggctcagcaacatg  
ctaagaaaccttgctaaaagtactcttctacttggctcctcttctactagatcctttattgtcccactcgtgccacatatgcacctagtttgcac  
caacatgagtaccaagacagtcattaatagcccaacttctagcgtggccttacaatcaagctattaaggccaacggacaactctattgctc  
aggccaaatccccgtaaaggatggaaaggtcgttgagggtgtgtcggcactcaaacctcgtcaatgccttcaaaccttgaagaagtttgaagg  
aagctggttccggcttggaaaagattgtcaagattaatcttctagctgacatgggtgactttgctaccgtgaacaaggcttacgctgaagact  
tctgatcctaagcctgctcgttctgctgtagctcaagactcttctctgaagctcaaggtgtcaagattgaaattgagtgactgctccgag  
aaattgctactcacatggctactcactttgactttctccttgcgcatcgccttcttttgtgtatgtcttggcggaattctcaacgcatagctttt  
tgattttctgctctgttataataaaggaataaataacgtatttcaattctctgattttatccttcttatcatcaaaaagtattttttagt  
agcttcataagttcgttccagccaaaccatacaacagtagaaagagcgaattcagaatcaaacccctaggtcccttctcgcgacagacaca  
tactcatcacctccttggctactcttaagcttatgcttttaatacagccgttctctatccaactcttctcatttctaatgattatacctcgtata  
ccacgttagaggattataaccaaagtaacgtaaaataaaacactcattaatcttatacaagacacgttctgatacactattttcatctgtttcc  
ttctgttaagatcattaaagtcgaatccatagcataccactttgacatgtcttctcctcaagatgtttgacataaaaagatcttttccggtatcta  
accttaggcatctggtagtgaaaaaacgctggttctcagctcccggtggcccaaacctcaaataggtaggttcgaggaaattcgatcctcga  
gttcgtgtctgttcaacaatgatttccattagacgtcgtgctgcccgtgaaaaaccgctaaagatgccaacaccggactgctggcctcgcgc  
tgctggtgcagaaggttactctactcttgtgaagttgactctgacgaggctaccggctttaaagtgtaagtttcttcaatgaaacactttca  
ttccttgttatgattccttggagcgaaaaacctcgaatgaaagtgagaaaacaagcaacgtctttactcacacaaacaactatagtgatccagt  
ggcgtcatggccttagtggattcattgcttctgctttgccctcctatcgtcgtagaattctgaaaaacttgcctctgagtaattgtttttg  
ataattatccacttataatcttcttggcagtggaagcatggcttattaaacgaattacaaaacgttttctcctatttactcttacacatag  
atagttgagcgtatcgtccgttcaatgaagaatattcatgaattgatattctaccttgttttagttccagttagagttgaactgtttatgata  
gattgtggtgagtagataaatttagctgtaagatggatctacgatacttcttcttttttttaaaaaaaagaaaaaaaagaaaaaga  
aaaaagagaatgcacttcttcaacttgaaccttcaactatcaacatctcacaagtttgacaggcttattcatagatcaaaaagaataagaa  
aaaataataataaatacaaaaactgtagtaattcaatataatggatattcgtcgaatgctgcatgatcattttaaacgagcggttccagg  
tcagttactatctcgggtgaagaggctaaagatctggctgaggtgtactagtagatttctcgggggtggagtgggcggaatattgctgggtg  
aagagcgaagaggtagaattgacgaagaagggttgtcctgggaggtagtgtgctgctcattcgagggtgctgctaaatggcagccttgag  
ggcttgcgttggttggacaagactgctgaggaatcaacgagggatgactgctattcagagattgtaaaggattcgttacttgcgaactcattgct  
ggatgctgttcttcttcttccgagttcaggatttttccaggttgaccagctcgggtccttgcctagagtgaaaggattaacaggtgatctggg  
tttagttgatagcaattccgggtggtgccgaatggaacgtgcaggtaatccatcctcaaacaccattttctgctatcaacacttggttttttatc  
ttatccataccattggccggcacataaggaattaagttgggtttccagtaacagaaccagaaatgtctattaaggtataggaggtattactagca  
tctcgtacgtcaacttttcttgaagtacagctctcaaagagtctttcttctcgtttgtcaactttgacgatacttgcctcgtacgaagcaagta  
caggacgggtgatcagaaaaataaaggagcagaattataagcaatcggttttaattctcctatacaaatccggctgctcaagctggaacg  
cgatgtttatccgaagatcatacgtatccgtgcctatatcaactataagtccggaggaaacgtgataggaagctcagaaaagaaaggaata  
cgtcctgtcagcatttgattattagttgatcattcctcaaacaggtttctagtttcttctgctgagcagtaattgtgtcttatacgtcaagaa  
aatgcgatagttgaaatctcaaacatacaacgtagtcatggttaaatattgagcggcctcgttaaatctcaaacattagcaatggctggtg  
gtcatgatttttcatcataattgtataacctgctgcaagatgtgaagtaataaagcaaatctctgatcttcaaaatcaaatcgaatagcaaca  
gcaccttgttggcgaacacctccaatccagtttttcaacagttccctcaacattctttatactcggcaagcaggacttttcaaaagactat



catggcgggtaccaactaactggccagaccgcaattggacatactttgagccatccttagttctattattagtagacgctttacgcaggttccatt  
cacgccttttgaggatcagcgtaattacttgctgaggggtaactggacaatctctgaaaaccgacgacataaataatccgcatgggattatc  
atcagggaaaagccaactttccaactcagaagtaggattgcaaccatttaagtataacttgaacaaaaatagatgattcttctgtccgagaa  
ttcattttctcgcttcttagttcatgattgacataattcatggataggatcatataagattacaggatgtgatcaataaacgaccaagtaataaat  
caatggtttctgtctacctttatcctgaaaattattaatatacattcgtcccacgcttttgaaagatcatttaaggcacctgttaaacacttcc  
cctttctagtgaaactagattttagagcaccgggtccagtgtaaatagagacaatgctgcaccggtatttggccaaagcgtagaatgcaattgcc  
aaaaatcataaccgcattctgtcgagtgtgaacattcgttttctaaaatcatcctagatataagatttgaattcgttctgtcgagacaa  
tcaagacagtttggcggaaaatgccgtcctgcgatgtaattgcctcaccgtctcgttttctgaataaaagctaaaagattctacattaccgtata  
acataggacgtattttattgcatcctcaaaagaacgaattaaggagtgataatcaaattcggtaagggtgaattgttcttttcaggggagtagt  
gatatgctgtcgcagctgtcagaaaagagatcgttctccagaaccgtagccagcaaatcaaatatgtacaggaccatactctttataatc  
gctaaaatgcttctcgaacgcggctcgagttgcttcaaaagagcgggtaagtcaatcttttggccaaacatttggacaccttctgttccaaaag  
ataggaatactacctcgcactgtaataaagctaacagagtaatttggagatcagaggatttccgttcaacatagttggcaacggtgcatcat  
catcgacaccacgggcaagaacctcgtaccgcacgaagagaggatagcttgatagagaaaagccgtacatttgcattcctagtttaaaa  
ggttccgtaccagaaaagccacgaattacatataaaaagccgcatgaatccagcacctcttctcgtcggaaattcaggtgagagcgaactt  
aaacaattgacggagcatgaattcattccataaactgttcatgcatcgtgtctgattggggatccgtataagcatgataagtgccgagctgtaa  
acgagaagtaatacaaaagcaagggaaaaataaaaagtccatttgcataaaagtttgcagggctgctgaaaggcttgaagcatacttctgtg  
catcataccctggaatgtccgaatcgtaccatcagctgtgttcttaaaaaatccccttctgacgaatgtgatccaattagggcgatttacgct  
gtaaaaaaaaacctctgtgatacggaaaatgcttcccgtcagctatacagcaacttgcctagctcctgtgatgacgcataaaaagttgaatt  
ctcaagttctataagacctagcgtaccatataataggacgactggaaattctccggaagccatctagcggcttttactaagagatacaaaactctgc  
tatacagacggataatgaattttgtttgagggacagaatgaaagaccaaagcatagctctatttgcgagtgccagcgtatgagggctgctctc  
caatagacattgcatcgttacttctgaagtattataaagtatttgaatgcaaaaacaatgatacccaattttagtgtgaatcgaattccagtct  
aagtaaagagaaaaagacaatgcttgggttgaccaagaatagcttaggtagcacttttaatactgtaaacgttgatgaaattgacaaa  
gttctattcaatcctagtcataaagtaagatgattatataattttaaattcacctattttaaaccagtagagatgaaaaagagggaacgctgtg  
aattcgtgaagagccagcttgaatgaatgtaactaagggtctcaataagaatcaatgctcagtagtatgctcaagatcagaagatttctctcc  
cattttagctgtttatttgaagacatagtagtcttctagcaaaagactcagcaaatgtgtatggagagcaaaaaaaattcagccagctgga  
aagaaggtaataacgtacataagttccattatgtaatgattctagataaggaaacattaagacttaagttgcatatgctataaatccttagaa  
aagtctcgtgaagtattataatagaaaaattccgtagcagttcctgtaccattattgatataaatgacgacttagaatagtaacaatttactat  
agtatcgatacagctattgtctatcgtcagtcgtaaggattatgcaagaaatgctttaaagcgtatgcatcagcattcaaacgcccag  
ggttctcgtaaacagagactttttataatttccgcttaagagttatgagaccattctacgtttcttcttggaggtagcgaacgaaaggaacatc  
ttttctgagtttctatttctacttctggccctccgttaagcatgggatacaaaaatgattccatagcattattcttagaaatattgagatgaa  
acagaagtcgaaaacagaagactcttttctgttaaagggtccaaccgagaaacctccatcataaaaatcatgcatacccatatgcatgttt  
tagaaggagaaaaagaagaaaaacaaaaacaaataagaggtaaaggatttgggcaatctttacaaaactggcgttgcatctaaaa  
agcctattgaaatcgtgaatagtagcatcaagtagctttatctgtataaaaattttagctttcggactcgtatgaatagacattccacgatg  
attttaggagaatttcaagagccgtaatggtaatgaccgatcaaggaaagaacgggcttgggtttcaaaattgactgggttatattgtcatatt  
gctgtgttctgtttttatcaactatcttgaccgttctcaattaacaatgcttatttgagcggaaatgaaagaagatttaaagatgacggaatgaa  
ttacaagacatcaatgctctttacgtggttatatttaggacaaatacctggatcttatgcattacagaaagtaccagcaagattatggtttc  
agtgatgaactgatttggggaattatgaccatactatcctcaccggtcattccgttccctcaatgatggcattacgcttctcatggccatcgag  
aggcttccacttttgcgggtactcattacatcttgggcgcttggtacaaaggaagtgagatttcaaacgagccgctatatttccatctggtttg  
attggaactatggttcaggatatttgcagaccgctgttcatcattggatggaatgacggatggcaggatggcgtttcataattga  
tggattgtaacgataccgttggcttttatggatacttttgggttccagacgtccccagacaacgaaagcaccctactcagaggaagaaaag  
cagcttgaataaagcggcttctgatattcctaaagaaaaagcaataaccataaattcactaaaaatcttacgatcttggcgcacatctatggt  
ttatcgattcttggcttttagtgagaaaaccaagcaattgccgtcaatgtacttatggccaatggatgaaagcctcaaacgagtttactgttc  
tcaaaataacaactatcctacagtcactgctgtgggtgtgtttctaccttgggggacagttatgtcagataagctcagtggaactcagat  
ggccattcggcttattttgttcatgtaactttgatctgcttctatattgttagcatggaacgtacctatggacttaagctcttcttatttctct  
cgggatgtagctacgtggaacaagctgtttggtttctgtgggcaacagatgctgcccgtgataatgatcaagaaagaggagctgtgttttactat  
gaatatggtgcaaaaatgctggcatatattggtgggaccagctatgataccaatacggatgcccaggtttataaaaggttatattgcttgc  
gtcgttgggtgatttacattgcttctcgtgtatagtaagcttcatgcaaatgagagacaagcgtataaagcgtgttcaacaagatgctaaagaa  
gagcagagctcaacatccgtcgacatgacagaggcaatgcaatcaaaaatagacagtttggaaagccagcaaaaggcagcaaaacctttacaga

agacgattccgttctaaaagcccctaacattgtacttacacgcaaaaaatTTTaaagcctgatgaaatataagagatcattcaaatcgttttcggt  
gtataaataaataattctcttctatctaaaacacacatatTTTTcaatTaaatattgctttcatattttctgattgtagtagcactatgaagctca  
ttcacggtcctgtactattctatcatggtaaggaagaactctctctaccttagtaaagTaatctgagtagaactgtttgtttgtaaacaagttg  
aacggtgtagtaaaatccggcaaagcattatacaaacattatagaaagaataaaagaatcagTcaaaaacggTTTTTaccatttctTTTTTg  
ttcagTattctactaagttatggacaatcaacagcttcatatagaacttgacaatgctgtacgcaatTtcgagatggctgcaggagctttcca  
aacaagaaaccattTaaaggtggttacgcacgaacagatacaagcaactTtgcatgggtgaatggagaatgggaatgggaatgggaagaa  
aaacaaggagatggatgtacgaaaaaaaattTcctagttgcaatcagcattgctgacgatctcacctTcattccagcgatggttcatggcca  
actgaaagtcggctTcaagctattctaaaacgagaattctTgtcaagcaatattTTTTccacctaagaaaaacgTcggtaaatagacaagT  
gtTTTTaatcattaagagcgtctctctctctctctctctctctctctctctctctctctctctctctctctctctctctctctctctctct  
aatgtactTtcgtgtacgcacatccagTccatctctctcatgtctctTgtgtttTggTgaatagTctTcccaggtTgtattTTTTcgtcaacctTtTgc  
tcagTgtTgcTcaattctTgaaaaattTctaacatccgtTatactTtaaaatagTgttagtcagatccacagaagTgaatgaaagctTct  
caatggcataccatctctTgtcgaaggaatggaagatgctTgtcTggaagcaactTtaaccagTtaaaactgtTtgataattTcaaaaaggaacg  
TctacattcattgctTctTtaccgattatgagTtcagacaactaggaagagctatagcaaaagcaagcgaatctatacaaaaggacagTttgga  
cgagcggTttctTtaagTcctTtaagatgattcTtaaaaaaacaacTctTgtaaattTgtatagaaactTtggtatctTgtTgtgTccag  
atggaattTgggaagTatgagTttactcatgtTcactctactaatacaaaagcaagcaatTtgaacgactagggaaTgctTcataagtaggt  
TgtTatataaaagaaaaagaataatgtTgtataaggaataaaaaagaattTgaatgatccacgctTtcagctTcaactTcaagacTctact  
ctctctTcagcagcctTgaatggTcttagcatcctTctcaattgattTgggatcaaaactactaaactattTcacctTaaagctTctctattTctcat  
cgTTTTctTcacctTgcgcaacccaaaagTgccattgctTcaaatctgTtctTataaataattTggataaaaatgaacctacgacaaaattca  
attcctgaaactaatTggaaaggaaacTtagTgtcgagTtacacaaaaggagaatcctTtaagctattTtagTatgctcgctcaagacataaga  
cagacctTctTtaattctTtattctaaactcaaatagTcaaatctTctcggaactTtactTtgccaaaattTcgaagattTgaaacagctctT  
cgcaactactgTctTtagaagaatgtTggttaagTtcaggcaaacgTctataaaatggTaaattTccactTcattattagctTatataTctcaa  
attTgattTcaacaaatgctTctcaggcactggcctgtaggcTgtctTtacgactactTtcgcatgaagaccagatactactacatctgctcctg  
tattTggcatctTgagTttcagTtgggtcctTccaagctcctTgattTgccaatggatagcatggatacattTcgctctTgtTTTTaatgCgctg  
aaagagTatgcaaatcccaattTaaagcaaacgTtaacatatcaagTctgattatgtTcgaatggaaTgctatccctcgtaattgctctT  
tcaaaacaagagacagactcactggaattcactgctaaatcatgactTttacgactatgaccaattgctacaaagTattTgtaagTaaatctc  
ggattatccctTgaaattctacTtggTgaagatgctcctatctgTcaaacatctgcatctctTggctacacgctgggtcaagTttTgcaaaagcat  
atccccgaattTtccctTctgatgtaacatgtTcattatTaaacctgtTttacagggtatcgtTctctcTaaacatcagcagcggattTaatgaatc  
gtgattTttgTtaccctgatggTttctTcatatagTtcaatacctgTttcaattaagggtgattactTctacaagggtgatacaattTtagattgT  
tttataactTtatataacaatacaaacatctcacactacgattatcaataattTctatagaggagctTtataaaatgaataagatagattTga  
aatcccgTactTTTTagTtgggatattatctatatacaaatcattcccaaaaaggagacgtTtgattatgTaaaaaccaaagcattTctTt  
ttcactgTgatccataagacctTatgcatgtaaggatagTcgtcgaagccatggtTccattTgggcaaaagTtTccgggacagTctcagcaa  
cacctTgcatacagatagTactTtcatatggagattctcTgctTtaactTtcgcatcattgacatcaataaccagatgtccattcatgcttagaagct  
TggcactTactTgtTgtatctTctcctTcaacaagctTtctcaatgagTttcacgTacgaaaaaggtccaaaagTtTctcggtcTaaagaaaga  
tactctTgtcagcatctgggtctgtagagcGataacataaatattccatgTaaatcttagTcatatccatcacagcagcaggagcTaatctcTgat  
gagattTaatgattccatgacagcagaaactcactgTgatgtTctTtccattTcaattgctaaactgTtaaatggcggTcgctTaaaggctTac  
attTtactTactTaaaggtTgtTcaagTtcaaacgaagaaTgaaatccaaaaatcTcggtatccaaatggccggagcattTgtaaaaacat  
attTtagcTaatcgtcgtTtctTcaattTtcaaaatTtaatatcctcgtTaaatattTgcagcagTaccagggtcacaaccacctcgtTta  
attatactcTtaaaacggcatgTgattcgtTtaggcattTtccctggaggctTctcgtTcaaggTtagccatcccaaggctcTtcgacgtTtccc  
ggaactaaaaacatgCagTtagTaaacaacagTgtcttagTcacccaataactacatcagTgagTtaaaatggattgataaattgCcttagaag  
aagcaatattTcTaaagattctTcaaatagagcatattgtatccgaattcctggacgggagatagacgcaatatacaagaggctcGctcgtTaa  
ataatgcaacatcctctgtatgtTcaggctgagaaagcatccaacgagcaaatcggaaacaaaattcgtcgtTaaaaagcGcatgtaactaaac  
actTtctgtagaggtagTaaattctagaaaaatcgctTctactTctcaaaatcaaggtattTctcaattcaccagTtTggtTcatctaatctTt  
tacatgaaaaaaggagctTtaattTcagctTcaaacgTccaacgctTtagcaactTtcgagctgggtTTTTgaaatctgcaaatgaatgtTatag  
attTtagcagcattTcccgtcaatctcaactcGctctTtgcacagTgatctgctTgaccctgactgacgactTctgggggctcagcGaaaac  
atctgcccgcacagaagccaggacgtcaggcggcagcaggagTgtaatggctgTgtTgtgagactTgaacaaactgtcattTgTtaactacag  
attccaatattTtcaaatatccgactcacctTcaagTaaactgcatactgatgcaaggaatatgaataagTcgtccaaaattTgTaaacg  
tgatcaggctTtctTgtctctTcgaattctataattTtccaaaatggatgtgaaagaaaaatccagccaatcatctctgatccctggataaat  
actctTgtTacaattTtTtagcaaaaatcctTcaacctTtccgtTaaagcaaaaataacaggaatagacacatactctcactTcattcggatca

tgattggttccattttaaagcacagtaattgcccataagtctacagaataagggatcccagcaatgcctctttcatacacctattgaacagtca  
acaaacattcaaacagctccataaaactataatcctctgcataccttttcagaagcttctggcccagcaacaaaaaactcaaagtctgcataTTTT  
ttccagtaaccaaatagcaaaggaattttgttaaaaacctatcgtaaaccgttcgaagggtatttaaagtctgcttcgacgaattcctatcaattc  
ctccttctattgtctgttgacgaatcaatgcttccctaaagcttggttaacaatgatgtcctttggtaaatcggcaaaagcataccagacgtcaa  
aatcatcaggattttctgtacttgacgatttaattatcccattctgtcttctgcaatgtaaatatctccgtaatccatcttctgtaaaatggaaa  
gacgcgagggttggtacttataaagcggcctcctttctaccaaactgcattatattaacgaggtattttgggtaaaaagaaagcaaaccttt  
ccctcctttccttttaggacaacacggcatcagcattaagatttcagtaaggcgtttctcacttcacactcccaaagtccaaaaattactact  
acacacagccagccagccttacatgattacacgaatgctaaatctatatacaaaaactttatctggcaaactgattaaaaaactggata  
aaattatTTTTTtaattcaacattaaaccaatgcattagacctatcttaacagaataaaaaccagccaataaacgcaacaaataactgaat  
cgtttgtctataaattgaagaacgatcctaaacatgataacctttctacaacagatctatccttcaaaatacaggctttgaatcatatcag  
ttcaaaaaccgatgatagataattcagcgggaataagtaacactTTTTTcaaatgatagcttatgcatagcttcttcatgagaagagtatt  
gaggagaggatccggtatttgaggcacgtcaacatactcaacggactcaccacgagttccacggctcttttcgctgattctcgcggtcggccttctt  
ttgtctttataattaagctgaaattagtggttccagggcctaatacagacatacaactcgttgatttctccaagtaagaccttggctc  
cttggcgaataggaaaataacaatagctccagtcgaattgagggcagcaaaagcagtaaccgtacttgaaaccaatggcgttctggataaatgga  
gtaaagaagaattaaaaagtccaagccagttagaagaggtagctaaagcagcacacttgagcgataacggacagggttaagattcacc  
gacaatgacgtaggcagcagggcccaagttgagcgaaccgaaaatgaaaagacaagcagcaacaagcataactgcaccagcagcgggtg  
tggaagttccgtcttttggtaaagagcacggctaccaacggcacatagatccagaaccacatggactgccaaaaccaccaataaccagggg  
gttacgacgaccaaagtaactcaagaacgaccataaccaccaatgtacaaccaaagttacaggcatcaagaatcaaagcagaagataaggag  
agttgataccagctcctttagcaactggaaacatagtagaagaagtagttgttaccactaagttgttgagagacatgacaaaaataccaaa  
aatgtacgatagcgaatgttctaccgaaaatactggcccaagaacaaggaccaccagcaaaactcctcgtcaatggacttttaagacgtccata  
ctctcttggatttcttattgtcggcaggacttctgactttcgaaaggacacgaatagcttcatcatctttaccaactgaaataggtaacgag  
gagattcaggcaagaaaataataccaataatgtaatgatacccaaaagtaagttgataccaatggagactctcactgagcagcttttgaagc  
ttgtgggtaccatgtaatacaagcagcaatgaaaataaccaccagtgacgaatagttgatatgtgacgacaacagttaccgcaatagacggag  
gagcaactcggattgtaaccgggagccaatactgaaagggaccaataccaagaccagtcagatttttagctactatcatgtaatccaaga  
aggagtagtagtaactgaaataataccaatgatgtagacgaagtcagccgataatagaagccgcttaccacaacgatcagcaataggg  
gaagacatgatacaaccagcaaacctgtattgacaataccaatcaaaagaccttgacccaagatgaataagcatatgaaatccgtaatgg  
ggtataacgatccgcaaacgggttgaaagtctctactagtgcaccaccaatggaaccggtatcagcaccacaacatccatccggccatg  
gagacgaagatcaacatgatcatggtaaaaatcttaccagtttaaagtttagtagcagactctgaaacagaatttaaaatctttataccaataga  
tagaacgagataactgaaaagagaaaaaaataacgcaaaacccgtaagaatagaacgcaaaataacagaaagattacctacagagaacta  
cacgaccttaataaaagaagtgtgtaataaagataaaaaccgattcacaatctcaacggaagaaaaagaatgtgatctctatcgaaaagag  
agtatagatattttgggtacttttcgtaaccactttaggaaactgcaaaagtagcagctagtagaagtgagttctatcagcctttccaaccacgc  
aaggctgtcgtcagtgaaataaggaaccgctaaaaaacagtgggaaaaatgacccaaaagaattataaaatattatctattctttgtgtgt  
ccgctactgtttcaagacctcaaaagaatttgaaaaagcgggtcaaggttgaagcttgaagattggtgaaagaaaagaccgcacgggagtagt  
gacacttatatagatattcgtaattctacccccgaaaaggaacagcgtcttgaattctcttaggaaaattttgacatctcaacgttaaggatt  
tcaactaattcgtcacataaaaggatacgaagaagatcatgtgtcatagtgcagatgtattggctgtccgattgtacaaacagtcacaata  
atgcgagagccaatcatggccaagtacgagactactgtctccagagatcgataaggtaactgatttgcgtattcagacaaaattccgtacgtatt  
cattgtccttaactctataacgaaggaggaggtattttagcgaacgatacagggacatcgaaatatgagactgagttaaatcttgaagaa  
aacttaaaaccaaggaataaagtaatagaagagagaatcgtgaaaatacttcaacaattgattctacttctgtctcctgttctgttagcaat  
ctaaatgaaatgatctttgaaattccgattttatccccattttccatcccagttactgacgtccaggtttcgtaactgttcttcatctcaaatgt  
ccatcggataaatttggggttacgattcaatttttagcaaccagccaagggatacaccttcgacacagcatataactaataagaacgcgttaa  
caaagcaactgactcggaaattacatacagaagaaaacaatagcacaagaggatcccgaagggttcatctcccttaaaactgaagca  
catgcttataatcgtaaggttcaatgttctaccctctgttagaggagaagcagccaatggtgatgctatcctttgtggagattaggtaacattgc  
tctagttcccatttattgttaccagataaaagtaagttacggccaatggtgaatccatgaatggcttctctacggaaatctgaccattt  
gaatcatttgcaaaagcatgctttgttctggattgatagattgagcaactttattcaaaaactatctgaaactaaataaaaaataaactggctc  
attcatcatggtaaagcaaaatcaataacttctcatccctgaccttctttgtttttttttttcagagaagaaaaagaaaggtggcaatgtag  
ccttgattcctttgtctcgaatccgttaccggatgtaaaaaattcatgatagcgaataaccaaactgattggccataactcctccattta  
ccccacataataaagaacgaaaccgctttttcccggacactttgattggttaagtttagtgtgattttacattccgatttttctattttattcaaa  
gcaatgaaaggatcaacgaaagagctcggacgactagcaacgagtagtggtagaatgcgttattgagagaacgacagttttcatacttccggtt

tgtgcattggtacgtcttcacaatttttttaacaacacggcttacgatgcctgataaataaatatgccttgcatgtgtgtaaagaagtttcgaaa  
ttaaagattttgaacaggtaaaatgagataatctccacaggaatggaaagaagtgaaaaaggatctctttgtaactttatattcgaatttag  
gccttcattcttgacctaataatccggctcgtttgcaacactttccagaattcagcctaaccaaacgagggagaagacagtgaaaaacaaaca  
aacgaaaatgaaaagaaaagaacaaaacatgacttgaaattgtcttcaagtacacaacatgcaaattaatctctcaaataccttacctg  
tgactcactatcttctgctccagtggtttttccaacacgcgctccaagggaacattgtacagtagattgtaagaaaagtttctttttctttc  
tttctttcatggattcttctcaatagttgcaaaccgagagccagagggtcgttccgaagaggtttgggaaaccgtctgaaactctgtacattc  
gaaatattgaagaaaaattcggcttaccgtaagatgaaagcttctgctgtctgaaagaaggtttggctctgatgtaacgtattggtaaa  
agtgtgaaacagattctggagcacttgttggagcgtacggcaaagtactcagtgttcaagctagaaagacgttacgcatgcgcggtcaagcat  
ttgtgttttgaaaatattcaagatgcaagtcgtctgcaagacctccaaggctatccctgtatggaaagcctatgatgatccagtttagtca  
acaaaagcgatgccatagtcagcttcaaatccacaagaattagaagcaaagaagttcaacggcgtgaacgaagaggtatgaactgtctc  
ctgctgctttatgtcgcaacttaactacagaaagaaagattatacagattggaaaaggaggaatgattaatggctttagtgatgcttccaaa  
gcggggttatttttttttcttattgactgcttattaacaaatgatagagttaaaacgcacaggtgactacaaccgctgcgctaaac  
ctgctcataagaacaaccgtaaacgtactgctccaggagaacggaaattgaatatcaacgaagattgcttctcccaacaaagttcttcta  
cttcaaaccttcccaagaagttactgtgaaatccttacacagattttgaagcatatcagggcttccaggaggttctgatggttccaggagcga  
ggggaattgcctttgtgaaatgatacagaagagaggtggcattgcaaaaaacggcagcagcaggtatggcgctcagtggaatcaggtcaa  
agtccacttggcagaaaagcatcttagtaggctgggtctaaatggaactgacttatggtttattctaaaaaatgaaaacagagatctttct  
ttcgtttcgttaaattatgatagttgaaaggttctggctgaacttaaatgtctcgaatcatctaagacgtggacaacactttaaagcgggtgta  
ttccagaagaaccttcatcaactctacgttcccttttcttaaacgactcaaaaactttctgtagcagaccttctccaagcaatccacttcttg  
cattgttctgtaattcataaaaggtgcatacagcaccgtcttccggtttcaacaactttaatggttagtaaaattgtggtatgaaaatggaa  
ttctgtttaaactcgtatgatcatcgtacataccatttatgataatattcccattcagcaactgaccgcaatatacccaaacgtatctctt  
ggttctttctttagtccattctgcataactgcttaccatgtcttctacgattcccgaaacactggtaaaggcaactacctaataaacatc  
agtcatatgcacattgtaggtagaaactacgggtgaatggcctcattatgaatcaatgggcttctagtaactcggcatgtatactcagctgagta  
attctatgctcccggcacaataaaggatccattttgccaagcgggttctgagattgccaggcgtttcattcattggcagtagtaaaaaatggag  
gaaaattatatactgtaggatttcatattcttaaacgctgaacttctttgggtgcagaaaggttctttatggattgtttgcttctccatgtaa  
actacaaaggtatacgaagagctgaggaactaattatgaaagcaggtttctaaagtaggcaatgttagaaacaaatgaaaatagaaag  
aaatgatccaattgaaaaagtcaggatggcaagaaatgaaatggaagtgaattttgttctgaaagaacaaacgttcatgacagtagtac  
taaagatgatctgtaagagagaggaatgaaactcaagcgcactactcctgcgtttttcagtttctaaaattaagctacatcacaccgatagttgt  
gttgccttttaagaagtccagcagatatttcgaaagcatgcaagcgaacatctgtttcattcttctacagacactatgtgattaaatattgtgag  
agagatgcagatcagagtagaaacgttccatctgggtcacaggctcctcaatgcaaacgcttacttggtttatgtttgagctgtgttcaa  
tggtttccatcaatgatataaaggatttttttgcattgtattccttcaatgacatttctgaaactttatgctgaacatatttcttctctg  
tctggatctaagaaactgcaacatgtacggatggcaacatacttctcaaaaaatatacaatatcactgagactaaaagattgaaactaaa  
gtacttgccttctgctgacttggcgaatctcagctgtctatatatgaatgacgagttgagtatttaaatgaaacctgataaattttcgtt  
cttaaatcttagcagggagacttctatgcatcatgcagaaaaccattcaatacgaacgatggcattctatctatttttaggatattttcgag  
tgctaaaataaattcagtagtcagaatcaagagcacataataagactatttcttaaggaagaaagcttacctatcataataacagaattt  
ccgcaatcgtaacagaccaattttgacttttccatctgcttttctcgtgcttcaagcacaatgttcagaaagatcttcttattagtt  
atctttgcatgttgaactaattacttcatcgtaacacgtaaaacacatatactttgctgcaaccgttcaattgaaacaaaacctgtttgctcag  
atactacaatagctgttagcaacaactcaaagtccttgctatacgttaccttttcaatcgggaacacttgccttgacattttctgctaatctag  
gtgaaatctttcgattttgtaaaggctacttgttcttagacgaaatgaaatattgaccttgcacttgcggttgttacttgattgttcaaacggaa  
gtcaaagtttctactgtaatatggtttgacttaaaatagacagaaatgaattataaaagtttactacaactgaagtttaaatgatgata  
aaggaggtatctttgcttattctattttgttatggctaactcgttattagtttagttctgctcagtggttccagttcagcggcctcaagctaaaggac  
agttgcatttaaaacaggaacggagacaagaacgaaaacaataaaaaaacatcatggaaagagaagtttcaagcttctctgaaaaaag  
tgaaagccagctccaattttcttttagtaaacgctaaaatatacaacatttgagcgtaaatcaggtgaaacaaaaaagatttaagagagca  
agtaataaaaaatcattagaaaaaaactaacgaggtgatcagttatagcgtaggttgacttgggtaaacatacattataacagggtcgtgc  
aaggaatccaacctatccgtccgaatagacctcaataccaagtggtcgtcgtctatatcttttttactttgacttttaacaacgaaaag  
aaagacaagaaaagctaattctttagaaggtaaaaacttaagatctacattgcttaaaacaaaaggttttcaaccctttaaagcattagaatt  
ccaaccaagtcctcagttctccaagaccttcttcaagactctatttcttaacctgagtagcctccagcttttcttcttccaggcgtgcttta  
agatcatcgatagcagcaacttttgcagagagaacggattttctttctcgtcactttagtaggaggttccgggagcaacttttgaccattagt  
ttgttctttgttattttatcaacgactggagcggcaccaggtacgacacgctgacgaggaggtgcttgagattggaagtactgttctgctca

aaacgtcgagctcctcacgtcgataagagaatgtagaagcttgacctctagcacctggagggcgataagcaccggtaggcttaacggtaggttg  
gcagccaactgctagcagactcgtgagccttcggagcagaaggttagctagagaaactctgggaatcctcctccatcaaagcaactcaaaa  
gactaggccgcaaaatgcctgataaagtctacagactcctcatagaacatgggtgctcctgtaatgtgccaatttaattgctattgtcaactcg  
aagtctaggagaagtgcagccgtcaacaggaattgactgtcggggctaaattcgagaaagtacaattagggtctgcaggtcgcaattttct  
tcatatgggtgaggcggctgaaaacatcaatgcttccctggagatttcaaaaacggccaacatgatataccttgaatttggcgaataaaagg  
gtatttcgaggagcaaggggaaagtgtggataacgttagcacggctgtcaaaaatcgaaagtttcgaggtatgtaccataaacaataccga  
actcctggagtttgagtccaagcaacatcgtgaataggacctcgcgatccaaatcaacacggcagcaaatgaccagtaattccaacagg  
tacaggtttgttcaccgtagtagttttgttgattatcaacatccgtctgtgtcaaaaccaatagggagtagccaaagcattccattgtaattg  
acctgtccgcttgaagaatgtcttttgggaaagaggtctagtaaagttaggaaatgctgtacgtacgcaggaagctggagccccctttctctg  
gaacaaatacagcaacgactgattccggccaggagataaggcaaaagctcaatcctcaactcgtagttgaaaacaggaggctttccaa  
attggcgtctcatagaaatgaattcattgggtactaaacgagctgcgagctttcatgcagctgtattgcaagttccaaccagctgattacgtt  
gaacaaagctgaagatcaagtcaccagtgtagttccaaccttcatattctgcttgggatttccatcagcttcttaccgggacgctccatgta  
cctaagaagtttctagaggagaaaatccaagttcatatatttctgctggtaaaactcctcaatgtctttccgattcagcgtcaacaatacaa  
caacacttccactagcgtgaagcgaaaaaatttccattaggactgtagcaagaaacacgagccggtcattagcttctcgaattctgctggcttag  
tatagtttctgttgattcagagtcctaatggtcttagaagaccgatctacacagttagtttctgcttcaattaatgtagcaacaagcaaat  
tggttttttgggacatcttgaagatgttttgaaggaatatctcctaataaaataaaagaagttgtattactacggtagttttaaactgtca  
gtcaggaccgttaacgatggataacgcgggactgtgattcaaaaagaaaaataaaataaatacaagatgaatgataactctaattaggaa  
gaatatacaagaacttcagtccttattcataaattagaaattataaataatatttttatttggcattgaatattccgtttccgatgtctta  
accataaactgttatactgatgaaaagaaatcaatgtacaggatattgtcatccaaattcagctaatctattgcttcatattaagcaattcatt  
tttaaaattgcaatgtgctgcatctgtaaactttgcaacttttcaaaagctgaaccgattgatttattatgcttgaacttcttctgatatcactggaag  
tttgatttctttaaaggatcctgactctttttttaaattccaatatttcaacgaatgactaaaatagaattataaatttgtataggcacggg  
atcttgagggggaacagagtaccataaaatattaccggagctgccttattgagaacttgagctgtatcgacattaatgggtgtttttcatcaactc  
cttgaccaggggcaacttccatcttcttttgatgagttcctggaattatgaacgcagccgtatacgaaggaagaggtggcatcgaatgaagattgt  
acgcagtagccaaaggtgtttagccccgataggttccaacagaccagaaggtcgtgcagcctgaggtactacgttcatttttgtatattggag  
aattcatcttggtaccgtacagattagataaatgttaggctgtgcagcggcagtaacgtctgtgcctccataaaaaggacgagctggtaaa  
gggcccattgttggttatcatgggaaatgtacctgcagaaccatacaccggggcctgatagacctattctgaaagatgggattgtgacc  
gatcagagtgggaactagcttctggcataagttggcattgcggaaggagtggttttaataagaaggttaggtgttagaaaatgattcgg  
agggtaggtgaaataacagcgttggattgatattctctcagggttttagaagccggcaatatagcacctgagcaggagcctcattcatgc  
tattattaccaataaggccatctgtgttggctgcagaaacctgggcttaccggaaaataagtgaaagcaagggttaggaactttattggag  
ggattgatgatacaacaatatttataatcaaatccccggagttctcaggcatgcatccctccaagattttatttgcataaattgcttctgat  
catcattgtagcagactcacacaaaataccggcgttgagcggatacccttaggtctccacgcacatagcagtaattgtacatgacaaagcat  
ctccaacaatcagaaacaggatggtccctataaagagatgtttgaatacctcgtttcatagaaaatgcgatcagcacggtgcacggttgc  
tcagggcggaataccaacatacagtaaccagggagtttgatcagatgaattccaaatttaaatatctgtgcaacaaccggttaccaggatc  
cgattggtttttaaaaatccagtcacctatgtgagtgagtagcttccataattatggatgttgatattgtttatcgtgtcttgaatgtgtga  
gaatctatgtcgtatgcagcacttcaacatccattctcctaactccatttggatcagctgcgcaaaatacttttgcagaaaatcagcatcgcggt  
atacctgactagaagggtcgttgaagacttgcattactaaacatcaaaataaaatccgagacgaactcatcaagagatgtgattggttttgtt  
tagtttctttggataacgtcaagagccataggatagcggattgcttgtaataattcagggaaacttctcggatctggtagacgttcaacgggtgca  
aataactgccttccattaacgtctctataccttgaacctgacgcataattacttttgccttccagcgggttagcatattttgctgggtgtgtt  
gtaactttctatgtttgatgtcatcttctagctacagattcatcacgggcaattttctttaaattccgtatctgcttctccttctcataaaac  
tctgagccaagtcagatggctgttctcatgtttacttgttcgatcattgggtgcgtttggagcattcgcagaaagcaagcttggctgtgaata  
gaagaaggtcgataggtgttggaggtagcgtttttggctcatcatagcaggtgatgcttgaacttgggcaaaagagtcagactgtgaacct  
tgccggtgcagcatttgaactggagaatacaaaacttccaaaaggcaactagcgcataacttggagaacctgatacaaaaacttgacatt  
agcgtcaattgggcaatatcaaaaacgaattccgacaagtctcgatacgcgaaacttcaatttaagttgaactgcttcaagcaagttggccg  
attgctggcaaaaactcattggattgtccgaaagtgattcgtttcaacaattttagaaagagaatttccactaatacaaaagtagcgttagat  
cattcaagaatactctcctgggtaccaaaacaaactacgcgttgccttggaaacttcaaatcgggtccaagaagtagaagaacttttgggtgttt  
acatcctctcaatataatgttagttcatacagatgatgggtggaattgctacatacgtagaggaaaccaacttccagacatagtggaatacggcca  
cgttcagtggtgattggaatgggagcatttacaagaataccttataatgcattgagtagttttaccgaaacgtaatttcatacatttttactta  
ccgaggtgttcttattgttatttccgttactgacgtttaaataatggtagtttacttaccgaaactcagctgtactcattgataaataaataaac

aaagaaaagaaaaaggaacattgtacagatttcagtagacccttctttccctgctaataagtttaataatgtatacacgttccgttaagtta  
ttgataacttattccagctaaaaggaatttggcttctgtttacaactttataaagggtgcatccaatctgtacatggagaattcctccaagt  
aagaagtctttttatttctttctttctgtattgcatgttgatataaaaaagagagagcgttctatgcgactgtatttctcatgaataatcg  
aagaaaagttgagcagcaatatccacgattccacatttcaaaaggaataaggaactgtttatgcttctgttcttttctgtcttggctgaaaa  
aaaggaatctgaatttatgatgccatgttctgtgaatcactcctataacctcaaaccttttagcaatcaaaaacgcaaaaatagccagaaag  
aagtctgttttttatttctctcttcaattatttattatagacttattaataatttatgaagcttaaatagcattctgtggacgaactatggaa  
atztatcgtaaacggttgaaaaatgtttacagtaaccttgacgaaagatatatacaaaaatctagctctcctccgagctcattagcattacaggttt  
ccagcaattgaatgaatcctcaatatccaagtatcaattacggctcgtcatccaggaaactcgaacttgaaaaaacaagcagcattcctgt  
actggtctatttttaggtcgatgctctgtgttgacgtgatcttttcaaaaggttactgaaagaagcaactgaattgactgacaatttgactat  
tgggagactgtggacagaaattggatttcacgcttaatttattgattcaatccttccctattcgcttatggaaagccttagcaaatccatccattca  
acatttgcctcctaacttttccaagtgttaggaagagcaaccttttccaaaaattagtgcacagatatccatttctacgctcgtgaagtattc  
atttcccatcgaatgttcttctgctcatacgcctatgaatacacaagcaatgctaaacatttgcgtattttacgagacgaacatgcatcaaaaattg  
gttgcttaagtagggctattatggacgcaagattccattagacatttccgggtctaccgtcgaactcaaaaacatacaaaactagatgactcgtaac  
ggaatggatccagcgttgcataaaccttttaactcaagccaaaaataaatcatgcagaagatctcatggcaattttgaaagatttctggaacc  
tagtgagcagttttagaagcaaaaagaatatttagtccatcagcttggaaagaggttgggtgaaagcgtaatgactctgttggcgagttggat  
gacgattcgattcatcaaaaaatcaacataatctattagcatggatggagtacttatattcaacaatggcagattttgtcaataattgggtctac  
aagcctatcttgggtattttagataccatacgcagcaatcgtgcagactctcaaattgcagttattcagaccaagagttggagagtgatatgcaa  
agtcttcaactgatggtactagattttgtgctgatacttctacatctgcatagatctggatctcgtaaagggctcaagtcacatgatggagacctga  
ctccgggtgctacaggcatatgaacatgacttgaaaaacaccattgaaaacagccattacgggaaatttgattcgtactctattaatccaattgcaaa  
aaacaaaggtggatgttaggtaactttaagcggcattgatcactataaagagtcagcagctcgttttgcaacagtaggaattacacctagc  
attgtttttgttatgcttaacatgcaattcaagaaaaacttcttaacaagagtgttttatctttatcgagcgtcgccaaagatttctgcaagcc  
atgagagatgtgaaagaattttgtacgttcagggagaaaaaaactctggaagaccaggaatatggattactgtatttcaagtcaattccat  
ggccgagctgccaagacttgcaatttcaaaccagtcaggggaagatcttattcaagacttggaagacattcagacgaacgcctatggtattt  
cttccaactccgtgctattgatcgtatctatagatttttccaaccttaattttatgttttctcatggaattcattcatatacacttctatgaag  
aagccttgggttcataaactttatgtttcttctctcttctctcttctctcttctctcttctctcttctctctcttctctcttctctctcttctctct  
tataacattatgccattgaacacaagtgcacatctttgtaaagtgaaagtcgaaaagtaactgcaaatgatttatgagtcattcaaaatgcac  
aaggaacgcatgaaatacaatgaaccgctaataatttttctctctctctctctctctctctctctctctctctctctctctctctctctctctctctct  
ttgtttccactgtaaagatgatacaacaatcttactatgcttaacatgacaatacgtatttcttaagacaacatgattttgttaactagttcaaa  
gcatgaattgaattgacttgttcatagtttaacgaaagatgaagttgatatagaatacatccaacgcaactcccacgctaaacttgagac  
acactcagattccttttctgtaaaagcatagagaagtaattctgtttgatgattgtgaaagaacattcaaccaagttgatttaaaaaactg  
atttcattagaagcaagaatcggaacgctaataagaactattgaatttgtgtgataccaatagatacctaacaactatggatgcaaaaaacc  
aggattaaggcataatcagattagtgaaagatcatagaacaggtagagcgtcaactagcaaacctccatctctatggttgaatctgacgggt  
atgatatgatgaacgatcgtttggaaaagggcgtatgaaactgacgaaagttaggggctaaaatcctgaaaatgaaggtcaagataactaaag  
atattgtcctaccaataatcgtctcaagtacgcataattgctgttgatgtattgttactttaccagagaagttcgcgaggaagacgaggagatt  
aaacaatggaacaatttagaataaactaataagactatgatttagattggcggatctctggcaaaacttcttactatgttcgagacacatcatc  
accgagttcgtcaagttcagagatcagtgacgaagatcagatcgaggaggaagattgtcgtttgtaaagttgagacttcaaaaattgacgaat  
gcctccagtttatgaagcaattaacaggaccacgctcgagaatcgagacgaaagcctataacggtaatggctacgggaggaggcgcgtaca  
agttttacgataggatgcaaaagagctggatgtagaagtaagtcgagaagatgagatggaggtttgatttaggattaaactactttgtttctg  
cattctcaagaggtattcgtgctgaacactgagacgtatgagatggcattccaggagacaagacacgacagcaagatccgcacatgcttga  
atattggctcgtgtcagttttgaaagtgacaggaccatcaaatgagcgtatcgggtgttcttactgggagggcgaacactttgggggtt  
gctgtcattgctgaccaggcatcatctttgatgaaatgctagaactatcaagaaggagataatgcggcggtagatatgttgtagcgaca  
tttatggaaaaacgtcggttatgagagattggcatgaaagatagcatgatcgcgagttcatttgaaaagtatttcgagaaaataaaaagtgcg  
gacgagtttctaccggaagacattgcgcggtcttgttattagcggtcagtaacaacattggtcaaatgcatatctgcatgcgcaaaagcataat  
gtcaaaaacatttctggggaagctttatccgtaaccacgtacaaactatgcatacgtcactcagtcacatcaagttttggagcaaccagacg  
atgaacgcttacttttaagcagcaggggctacttgggaggttttggagcttttttaaaatgctatttctgaaagtaatttcccgttctccatt  
tctaattttcttatttttcttcttctttagatcactttacctttccattttttctgatttttctgtcacatccagatcatgcagcaggtgatag  
aatggtcgtacaagaaaacaagagaaaggctctcataggattgcttctgcataataatgatattgatgataatgatattggacgggttccatgat  
gaataacataagatttccatccacagcaattctaggatcccgatactaataagtttgggtgtaggacatttcatatttctaacccttctgtaaggca

aagaaggtcttgaaggacaatttggaaacatcatgaaaccaatgctcatccatctctgttttgaatccatccaaaactgattagacattctaatttcgaggaatctcctctaaaagtcgataccaggtctgccaaacatctcggttaaacgatataataacgttgagttccatgacttgacggaaagctctcgttggcatagagccaatcaaagaatgctttttattttttacgttctgtttatgtttgtttacattttgtttgttgatgagctccagtttctctctttctactccctctcaacgatagtgttatctccgttccatgtttgcaaaatgattaaaaccaaacttcgccgacctttcaactcacctatgtctttgggacttgcttgccttgccttaaacctaggaaatgaatggatggcttgcatagatgaaagcaattccttggactcgtaaactcgtgaaacaaatctataacaacgagaaacaattcgcaatagaaccttttctttttctttatactttctttctactttctattcttctctctgttccactaccaatccatgcttattcatgtctctcggtcctacaactctactttctatattgtgtggatattgtattatcgacctagattctttgttacttacttttaattcgttatgtgaatcatcatcattttttgtagagatatgcctctctattatagatttcattcttttagctatagtcaagggttttcttctattgtggccttctactaccggctgaaacttatcgacgatcaaaccatttcaatttcacgctaataccgccatttcaattccattgcttatgggtgaataccgaagaatactatggaataagggtgaccacgttggcaacctaatttactctactacctaaaagtagtaattcttccgtcactcaggaagcttatcgactatcttggttcaataaaaagtagttcatctcatgtgaatctaatacagaagctaaataaaagggttctccggaatctccaatgattgggtcaaacgaaactttattggatcgtttagctcgcttagcttctcactgctacttttggatttccgattcgttctttaccaggtaatccgcggtactacttttttgcgaacccttatctggacaaatcggtaccactgataaaggcgttttatcagtgcataatacgtaatttaactcagtaactcctctgattatataaggccacttcccgcacgttttccactcctattcggaacgcgtaccagacaaaaatattagtaatacttttctctccgttgcattctttctttttattctttttgatacaataataataataatccactggctggaaaagattgggtgaaaagaaacttttctgttagctgctataattttttttctgggtatagtatctcttaggagaaagcagtgctgaaaaagaccaacaactcctcttaattgttgggttagttaaattgtgtttcttttgttttagacttgcggtacattttactgatctcatatccgtagcaactaatctgtttttgaaaactcttgataatttgatttcttttaatttaccgctattcctggcttttttggtaacctttttgattttttttgcctgctcatcatttgactagttcgtcgatatgagctcaattcctactgctccgttgacgggtgcatgatattgtcttaactaatgactcccagaaaaagatgatgaaaaaacaacaggagaagctactgttttaccgatgagcaatcagtgtagccatgattctcccgagaagaccatcactaatggatttctcgtcgatggcgaaacgtatttccctctactgaagaggaggtgaatacgttgtcgtatcccactcgtattcctactctcgtgggtcattgtcatcgtcgaacttgcgagcgattcgcttactatggctactgtccctttcaaaactacatgcaatattggctctcacgataatcccagggtgcttgggccttgggtcaatcgggtgctaccggccttcaacttttcaattttgggttatgtaactcctgtctttgacgttttattgccgatcaattttgggtcgatacaacacatttgatcagtgcccaatttacttctttgggtattctcatttcttactcactgctccattccctctgtcgtggatgctggaaaaagatgggtggttctgtttctctcattatcattgtttgggtactggcggtataaatcgaacgtttcccctttagtgccgagcaactcccaaaggtccaccttatgcaaaacagaaaaagagtggaaggcgtgcatcattgatcctgctgctactcctcgtgctacatgctttttactgggctattaacctggatctcttctgttctgctacaactaattagagcataaaactgggttctactgctactgcttccgcttgtattttcgttattcccttaggcatcctttggcaccaagcgtatttacaacacactcctcctacgggctctgtctttgtaaagtcagtaaatcatttactggctgtacagaacaagttcaatttccagctactaaacttctgtcccaataccaagggtgaagacgcaactcaaaaataattgggatgatttgcattgatgaattcttgcgtcttgcgtgctgtaaaaacttctcttctcccactactgggtctgctataatcaaatgacaacaactgatttctcaagctgcaaatatggatactgggtgtttccaacgatatttccaagtctcactccattgctctcatttttcatcccagtttgcgattacggattgatgtcttttgcgtcgcctgcgatacctttccgtcctattaccgctactgtaggttcatgttgcctcagcttccatgatttatgcgtccgtcttgaatcaagatatacagaccggtctgcttcagcaacttaccgataattgctcttataactacatcaatgtttggatccaaatccctgcttatgtcttaattgctttccgaaattttgctagtactgggtatgagattcttataactaaggccctgcttccatgaaatccatcattaccttattcttataccaatgcttttgggtctattctgtccatttgatttctcactgctgtaatccaagattactggatgatgctgtattgctattaccgctttatcgccggtattgcctttatttgcgttccatcattatgacaacatggaagaggagaaaaaaacttactacatccgtgcaagcgatgagcaaaaagaatgctgttgctactgaggttgaagactatttctcgataaagcgggcacgaacgcaactctcaaatgccgagaattacagctgctgaagaagccttcaaggcttgagatctggttaggaaacctgaataaaaagtaaggaccgtttgttctgttatgctgttttagccattatgccttaccggttgaatttaccggtttagcgggttaattagactgtgattttttttgatctccttatgtttttgttttagtttatatttttgcatttttggattataatctgttcattagtcttgtaactgcaattaataccaattcttctacattatagttgggtgctgattaatattacgagaggctatgattacctagatagcctaacaacatgaatggagtttattagaagaaagaatcaaaaagaaaaaaaaaaaaacgaagctgtaagaaattactacacatgtaacaagtaaggttgattttattcctatgaaattgataaaaagaagaacgacggtagacagtgagaattggcatgtactaagattaattactgagcaaggcttaattgtaagcattaaactcgtatataatagtcaaatcaaatgcgataaaaattatagatcttaccacgaggagtacataagtgacaagtgaggacacatgataaaaaggcaagaatgccgagagtggtgaaagaaactaaaagaacggacaagaacatggataagattattcttaaagtaaaaataactatthaaggcttccctcaataagtagacagaagaggattgctaataccataatagatgacagtttagagacaagcgaagaaaaaattgacaatgaaacgaaagacagtgagacaacgcgcgaagggaagataaagtcttccgatacattatgttatccatccacagttactcagtaaaggtagcgtatattgtcgaaggttatatacacaaaatgaatacggcatagaggagagagcgtaaaacgaaaatagtaattgcaaggtaatttaacgactaccttaacgactctgttgcaaatggcgtctgcagttatttttccctggccaaccaataatttgaaaa

tcttctaaaagctgcaattgctgaggtgctgtaaggtggatatagcagcatccaaaatatctgaggtagaagtattctttctgctataaaagact  
gaaagtacatgtaaaacaaaacaccattcaaaaattgacagctgcagcgcgatccgtcaaacaccatgaccaggaatggaatcgccaaagcttt  
gattttaaagctctttcaaaccactagcaaaaaatccacaaaaggagcaacaaggcttgagaaagtagcaaacatggctaaatggaatat  
atcggggcaaaagttacaacatcggaagatgcaagtattgcaccaagatgaaggtagattgtacgtatgtggaagaacaacagagtagga  
gtgcaagtaagccagtaaaaatggacgttgagagatctctgctagggcaataaaaatattcgtatcgcacagaataaaggtaattaaagaac  
caacaacgactgtgcacaaccaaccacgagaaaaccttcaattgttttcttaggtgagacttcgatcaaggatgtttaccaaacatcttccac  
atagataagcaaaaacatcattacatacgcatacaaaaacaggcacaagaaccagaaaaggccttcgaaaatattattaatgatgaaatggg  
cctgtccgacaacaaaagcagtgatcatatgtgtccaacaaaactgggaaaattgaaactgtatttccctttggagagaagcgcagcaataga  
acaaacctatttacaccgttagtctccaactttttaaattacaaaacaaaacctaccataatatacagcataaatgaaataaacggatgatg  
tgacacaaatggtagcataaaggaatcatgcacaaataaattggtgaaaataggtaaataactttcccatatgcatagtataaagtcgtcatta  
aaaagtacctgaaaacaattagccagagttcctcctataatacaaaaattagaaggctggaattatcccatcatcgttcacctctaaagtg  
cattcaaatctccgtcacaatcttaccagctacaaaactctgccaaggcaaatcctttcacgactcgggacacttgcgattgcaatcactcttta  
taaaccaatttgaataagagtgaccagtataaacccaaaagtgaccattgccaacactgcaagaacagtgcaatcataatcagagtc  
aaaccgtacgcgttatgaagtttgactaggcttttagaattcaatgatttttgcgttttgcgttttcttcttgagcatgactcttgttaaaggt  
acaaatgtgaagatccatctgatttcttctctgcaagcacttttactaacttttctgctgattttcttcttattggtctaatctatatcagtg  
aaaattcgaccagccaaacgcgtctcaagcctttcttttaaggcgatattggcagagtattgaactttacagacccagaaacaattcagaa  
agcgaaggtgcgtgtaccacacaagaatatttattgtgtagtggtgtagatgcttaactagataaagaagtattacgacatagcagaacaa  
aagaatagcggatctaaaagaattttctgtgttttgggttgcaaaagttatttcttcaattatgcttcttttacttctggcttctgctttg  
cgatactttgtaaacgatcaattacttcaattcgaagcaccatggattcatactttattatttctttttgaaaaatacacaatctacaaaatt  
aaaacacccttcagaccaaacacacttttcttcttcttcttcttataatcattgcaacgattaattccatttctgcatgacgtccagcca  
gtgcaatgatgaatgacaagagaagacaaggtaatagtaataggatcatggccaactgtaatttcatagcacctcacaatcaactgaaatca  
gatttagatttctttgacgcaaaacactttgccttcataatggaattgactgttttctgtagtaacaattgctcaattgatcgagagcaat  
tggttagcatccaaggaaggtgagcgcgaactgatttagaaaacattgttttgaaggtatgttccacgttgaagaagcgttcaaatgtc  
agcttctttcaataaccctttcacctaatacacgctcacgataacgctctatttcttataaacgcttcttctgacacttaagtctggtgaaatgaa  
tattcatataaccgttgaatactacgtccacacgtccttcgattccatagcattctttcaagctcagcaatcgttcagcaagcaatcttctcta  
gcgcaagtgttctgcttttcaagctcgcataatgatcgtgctgacgtataaattcttcttttgaacgttagacgatgcaatgccaagttac  
cttgtaaatataatctaaatgttcacgcatacggcttacaacagtaccaagaaaacgaagagaatacggtgaaaccgaaagcttccaccgag  
ttcaggtggtacaataagccgctctggtgaagttggataatgggatttgcacggatgagcagaaggagcactgatacaccgctccgag  
atgttcattacccttcagctaatgtggaggcatcaaacgagcttccaagcttcttcttcaaaaacttgcttatagttggcacatccaggaac  
tcgattcgtctattacagttacttggcagatgtttggtcaagcaaaaagcgttccaaggaaggtgcttacttgaacaaccgacaact  
ggatctggcagaggtttaaagggtcgttttaccgttcaaacctcggtagaatcaggaatggatgaaaggatccagcaattcttttct  
cttagcattctcaattcaattgttttcatatagtaagcgtaaatttcaaccaagttccacgttctgcatgagcgcattcgcagatata  
ctgtgatataaaaggcgaataattatcgcggtgaaggatagataactgttttggggaaagctggagcgtatgaacaggagagaggacaag  
aggtttatagggtcgttattatgagagggcaaaagtcatttcaaaaatatttgaaggagacaggaaaagatcaactgacataggaattga  
aacctatcacatctataattggcgtccaagcgaacaatatcaaacagtcacagaaaaatcttactgacaagtggtgaattaaaaaa  
ggtccttgaatgctggcaagaaggtaaagtcatctggacgctgaagagcataaacattagaaaaattagaaaactcatagctatcttcaatga  
acatccacttgaaattgaagctcagaagagagagctcgtctccaataagcttctgaatccaacgtacatgttgcagcatttctgattcaac  
atgattccgatgatattcagtgattcagatgacaactgctgaagcattgcgcgagatgattgtttgctggcatgacaggcaaaagggcgta  
aatatctcactattcgtcaaatgtacacaagaaaagcaccacaacacgtgacgaatgataaatgtaaaagaacaggaatattgttctccg  
aatcaacatcaaaaagaattaatggtttctactgaaagaaagaggaattatgtagtcgggtttaaataaccattctcaagttcatacaagtc  
aatgttttcaatacaaccaaaagatcgaccgatcttctaaagggtggaatctgacgcaaatattggggaatccaagttgatgatccag  
cataataaatagggtttctgacgagttatcattgtccttgcagacctcaaaagctaaaagtctagcaccacaaaatccagaagcattac  
taggtggcagactaaaagaagaagccttgcattcggcctttgagcgaatccaataactacgatttggactttcaataacagctaaaaac  
cgtccattagggtgatgaccagctgatattgtaaagtttaattcaggatgtgtaatttggtaaaagaagtcgcttcagatcctccttctgt  
tttaccagatcacagctattagctacttcatgacctgcgacgtacaactttgttcaaaaggcacacactgcttcggcaacggttccaat  
catctgcagctacatgaatgcttttaaaagctggatgttttccaaaagatctgtccatgaaagatgctgagacatgttcggtgtccagttctgctt  
tgacctgtttgacaaatctcaaatatcatagcatactgcgttctgttacgtgattacggaaccataacacagtaaccgaaaacagtaaacataga  
aacaanaattgaaagaaaacgcaatgttctgacatatttaatgaataaaggtaagagggaacggcttaactcgaatattgttgggatttt



tgatgggtcaccctactatgggaacaatgtctaccactttaccagatttcacaacatgctgtattattatcttttagttaaacttacatttcatt  
taaaagatcgaaatcaaacagcatagtccttcgttgggtgggttcccaaaaagcatatagctgcctcagaaagcacctacatcaaggcattcg  
gtgagatggcatctatcgcgcathtagacgctctttcccatatcttttacgccgttaagaataatactcctgcattagagacagtcaaaaagag  
ctgctgtgtttagcttggaaatfatcattttatactacagaagaacaaatctacacacttttctaaaatgtggtgaagttcgacgaattgtcatgg  
gtgtagatcgttttcaaaggtaagtacactatacgaataaagatacatgactgtaagggggcactggaaagctatctactgttcttactggaa  
atcacattaactaataatgatctactatagacccttgggttgggtttgtttgttgaatattataaaaatgaggatgcccttgattgttgaatatatt  
ctggatcatccttggatgagcgtattattcgggcagacttggatcctggttacgaagaaggacgacaatacgggctggtgcttctggggacaa  
gtgctgatgaaatgagagaagaatcagccccggctggtggtggtatgttattctcttttctcaaggcagctattaactcatatgttttttagg  
gtacggaaagctacccagacttctggaatcggacactagctaattactcatcatttcttctgctccaatgggatccttcttggaaactcaaaagc  
aatcccagatatcaccgtaacgagggatggttccatggaatattactaaggcttattctttccaattcatggaaaaatgaatttttgctgtt  
atccataaacctagaaaatftataatgataaagtcaacgttatgaatggcacaacgtcaagagaagtaaatgggaagaggagaggaaaga  
ggaaaagtaaatatgcttcatcttaccctaatacattataagaccaagattagctatagaagagttcgttattgtgtaaaacacgtaga  
atatctccatgttctaaacttctacctacagactcgtgctgcaaacatttcaattcatgctttttataacttccaatcttccatgaacaa  
caggtgtatttaggtgtgctgaacacatcccacggcttctgtgctattaagaaggctcttgagcaaggcagcttctgtacagttatcagc  
agtagcaaatgaatccatcatcgtcgaagaataacaccaaccggaccattttcaccaaccactggcatacatccaggccgatgtgtcct  
cattgttagtataacacctcgagtcatacaaaaggaactccaagttctgcttccgggaaggggaacactctgtatccaatacttcaataa  
cagcttgagcaggaatcgcacaaaatcacttggagaagtggattcgttgcggacggttctggtctttggaatctaactttatcaactggccatt  
ccgaccaaggatttcgataggagtaagcacaattcaagctcccaaaatftagaaggctttgctgagtagacgttagttgagtttcttctgtagcg  
gcttggatgttggattgtataagctttatcagacgtttacgagcacgggtcaaaagtccaaggccctgttctgaaagaaaggagatgatgaggt  
atattctggtgctaaaacatagcagaagaagagagaacagctctgaagctcctttatagtgaaagagacagaagtcagatctctccgacca  
acgatgtcaaccgctgaagggcacttggaaaagctgctgtaaaaagaggggattaatgtcagtaggagaaagctgctcggcctgtaagca  
taattctggcgatatcgagagaaacgttacctgaccgattatgacaaggctttgagatgaggaagagaaatccaatatcttgatgctgaggat  
cgcaattgtaccaaccaactacttggcgagcactgtagacgccgtaagtgtaccgggaatgttgaggatcttctggatgatgcccataa  
gcgtacacaagagcatcgaatccgagagagagtggaagagggaagatcttgcacaacgaatattcctagaaaccgaaattgactggaa  
tttgaatctcactaaacttgggtcacttctagatgaaaagagttagatgaagaagaaggaaagaggaaatgatgtaatttcaaaattga  
aggaaaaagaatcatttaaaaaagaaaagcgaacatcataccttgacttccagatggctgagcaacgcataaccggaccaaaccacg  
ggacaggatttgcctctacatgtcaacctgtatggaagggtcatttgcgaagagccgatgagctgtgtaaaaagctccggaccagagcctata  
atgcccacgacagggcctgaagaccgagtgaggtaccgacgaaccaagggtaaccaatcttggaaatgggggagcggaaagaacaaaca  
aagggaaaagagggtagcaatgctgtatcagtaacaacggcaaaaggagtagtaaggaattaacacacgaaaatcggatcagatgaaaca  
caggtcaatacttgaacaacaattgataaaaagtaattaccaatgaaccaagaagctaaagataagaaagacaaaaatcgacaagacaaatcc  
aatcgtgaatatttctactccaattcaaggaatftatcgtcgaaaaagaaaagaaacgaagtattaaagcaggatggaagccaacgtaa  
tagtagaggaagctttgttaaaaaataggctacaaatcaagaatgttactactagtctgttcttcttctatccaagtcatagagtcagttccta  
ggaaccttctgtaacgttaagactgtgcttggatgagtaaaactgaaaagtgcttctacatactggattcatatagcgaggtagaaagccat  
gatagaatgtgaaactacaaatftcgtttttatggcagggaaagcgaaccaatccatattctttcaaaagctatagataaaatccttgaag  
aaaaatcctgtttgcaagcttgcagggactactccttctgcagggattccttctctatttcttactaaagaaccacgcaacaaaagtaaca  
gaaagccgcaacttggttcctatggaagtctaataccaggtgaaaaagtaacttcttcttagtctatacttttaacatgttgcgatgaaag  
caccattggcgatagaacctctgtataaaagtaggattcttaattaccaaggaaggaaactagctcccttgtatttagcagtttctaccacac  
atacaatggaagagaaaagcaaaatgaaaatgaaaacgaagatcattgtgattcaaaagtcaaaaggcttatttatttttcttctgcttct  
ttgccctacaatttctgtttatgaaatftgttttgatctctctctctctcaacctctgtatagtaacttatctgatccttcttctcccat  
aatacattaatcactatactatcaacgttgctaaaatcacacaggcttctccacactactacgttgcactaccaaggcagccaaccacctt  
ctcttagcctaataataagcatcttaacgaaaatcgttaaatagagtcagacggaaaaaatcaagtatttggaaagtcttaagaacataaatt  
cgattgatttgaatftcaaggttgttgcaggtgaaaggtacgtattctaggaacggttggattcgtgaatgtttgattcttgagcgaacgactc  
ctcaaaacagcgtttttcaataccttctgtgaaacctcgttttacttcttctgaatcgtatccacttctgctggaaaaaaagcgagcc  
aacggctccccgttgaaccgttctcaagtcgagaagctctggccttactactctgtgtgtctggacgcttcttcttgaataacactg  
cttttttctatctatcttaaaagatcagaattacttattcaaaacaggttgtttgttctactccatccatcttctgattgagtcagcgtctt  
ttatatacgattatcgtcagtaaggacgttctgagccttcatatcctagggaaactattattgagttgtacgcttactgtctatttagatttga  
aatfttcaaaaaagttgattataagcgtcctgtatattgtttcttgtttatttttctttttccgtttggtgatctcaaaatcaatcctt  
ttcgcgttctgacacaggttcttctgtgattgtctctacgattgtttcttggttttattgtattttttttttttttttttctgattgctggtttc

ctgaaaaacccctcatatctgtagaattgatttcggcaattagttgaatcattactattccccctccccttatttttcgtttggtggttcttggtt  
ttacatcctttgtgctttgactgatagttctatctgtcatgaattcgattccagactcttactcattaaaacaagattttcccgacaatttgggtgatt  
gtcgacccttcttctcatcctcaactgcgaatgaattataatcacccctcagcagcacttctgtgccttcggtccctgctgcccttctgctcctact  
ggttctgctccagatggtgatccatccactgtaaaccatataattcaaagtagcttctggatattcaagccattcgacaacgtcaccagggggt  
aacgggtggtgatgcagaagcttctgccgagattggcaaaaaacattgataccttgaaaaacaacgaccaggccatcaaaacattgcatcttc  
cgtagctcgtatcaagaaggaatgaaaacggatgaagaggtagtaacaaatgatttccgccgaagctccttctctttgccaaggggaagc  
gaaatttctgtagaactcacaatgctgcttgggtgcatgcaagaagaatcagcgacgaactctcagcgtctgatattgctaaccatct  
ctaaatccgagatgatgacttttaatagacattatttctaaagataactatccccgctccttctatgtctcaacctcatgttatcaatcagtctgc  
cgcaatgctcctgctgctcctgctcctgtacctggaatcccccttctatccgggacaaccaggaatgctgccattccatgggttacccatgg  
gatctggaggcgttcagcatgcatatccttctcaaatagctgctgctaaccagcgagccatgcagtaggatctcatcctgctctggatattacc  
tatcaagaaatggaacaatctctcatgttcaaacgaccaggtatgggtctgattatcagcaaatgcaaatgccgatgctctatgaataggc  
ctctgtaatgctcctgctcctgtcatggttgctccttacatggccgaacactgtatcgataccctccgactcattagaatccggcacatctgctt  
ccggttccctcgggatgaggtatcagcaaatgggacctcccttacaagatgcaaaagagagaataggacctctcatctacatgaacatc  
ctgtctatgcacaccttctcatcagcttctcggcacaacaatataatcacaaccaccaacaaccaccagcaacaccagcagcccaaa  
caaaggtctatcctcaaccgaatctatgtttatcaaccatcaacctcaaggccttcataacttaatgctgtgccgttatacaacacagcc  
gcatccatgtcagctattcacaacaaaaccagtaattcttttacaacaaatgcttataaattttttatttaatgattgggattcttttagtt  
gttttcttctccttaacaaacatattaattgctatctgaaaaccttcaaaagttgttttcgactcttttttttttctcatatctataataa  
tcttagtccggagtctgttctgtacataaagtagatgattctttataggagatagtgaaaattctacgacactttaattattatcttttctatt  
ttggcgcgatctatcattcttgaaccatttccgtatagactgaaacctcaaatgaactgatcaatcattaattatcctgtttctttatgttaccg  
ttctgttactgttttacgttataaccgtaatccgctgcatgcttctatttgcgtgcttgaagacctctcatagcaccagtttcgca  
tacagaaaatacactagctattacagggttcaaacactaatataccgcaaacctcaaaattgttattagtttcttaacgttaattacat  
ataggccccaagcaagaattcaaaaagaatctctgtacctgctgaaaggccaccaacctggcactgacctcagaggttaagagaga  
ccagcgggtgatggcagattgttatactcctgcaccagaactacacagttgattaagtagcaacaggtaggcagaaagaggagattggtttgct  
gaaatctgcaactgtctcagttattcaagtaacagcaaatgcacctagaagattataaacagattgtaacaggcacaatatcttcgggtt  
cttctatcattcaacaatgacaaaaaagggttctgttaagaaccgcaagctgcaacattactgctgtttgaaaactctttgcatctaa  
caacaatctgttaccatccgaaaactacatatagaagaatacaaaagtactacagctgttctattctatatactttttttacgagccgtgactg  
ttttctttattatggatctttacaatacaatcagaagatcttgattgtggataatcgaagaatagactaaatatctaaaattggctttctttta  
ctatccagaacaatttcttctgataatccatatagaaaaaattgaattctcgtaattcatcaatttgcatttgcattgcaattgaataaataca  
acgttaatttacttttttagtcttaaacagcgagaatcaaaatgccatctatattgctccttgggttctggttctggtcattgccaacattggaat  
actggctcgtcgaaggaaaatactataactgttgcagacccaatcaaggctgaatcattgattaagggtgctcctaactcaaaagcta  
tttcttagacgttggtaacgagactgcaactgaaaaggctgttctgagcagatctactattagcttgatcccctacactaccatgctgctgtt  
atgaaagctgctgcaagcatggcaaacatgttgcacaaccagctatgtcaatccctacatggctgaattagaagaatcagctaagaaggctgg  
ctcatttgcagtaacgaaattggtgtgatcctggcgttgatcatttgcattgataacaaatgaagaagtcataacgaggtggcaagat  
caaatcttctgtcttactcgggtggccttctgcccctgaagactcaataatccattaggctacaagttctcctggttcttctcggtgtcttgtg  
gctcttgcactcgaagttctatgaaggcggcaagattgtagaaattgagggtgaaggattgatggaaactgccaagcctacttcatctac  
cccggctatgctttgttctatcctaactgattctacagtttttaagagcgtaccagattccggaagccgaaaccattatccgtggtacctg  
cgtaccaaggcttccctgaattcattcattgcttgggtgactgggcttttagatgacactgcccgtgattacctggatcctaagggtaccgctta  
ccttggaagaagtcaccgctcgtgtttgaaacgttcttcttccaagccgattggtaaaagctatttctctattaccaattcaaggattg  
gatgacaagaagcgtatcattaatggcttaaatggctcggtatgtttccgaaagcgtgactcctcgtggaatcctttggataccttctgctg  
ctactttggaggaaactatgcagtacgaagagggtgaacgtgacatgcttatttgcacataagttgaaagtgaaccaaggaaggtaagcaa  
caaacctgacttcttcttctgattatggcgttctggggctacacttctatggcgaagcttgcgttattccttctggtgcttctcaacaa  
atccttgacggtgtcattattaccctggtgtcttggctcctaatagatgaaactttagtctttgattgatgaactgccaaggaaggcattgtt  
gttacgaggaagtcacgatcaagactaaatgagcttttgggttgttaatgtgccattaccttcttcttattctttatagtttgcacttgttaaat  
aatattgccatatacttttaattgaatagctaatataacgtactgacgacgttaataatataaacgactactaaaagctgtgacaaagatgcacac  
acgcatcagtcagacttttattttgtacctgtaaaaagagactatgtcattttcaggctggctgtaaatgctccagctcagctaaatattg  
ttaattataaatatgtttgtatatacgtaccttttttctgcttcttctcattagaattagttccaccaggcaagatcaagtcgtaaatatgtagc  
cagggcgtataacataactttccaatggccttgcatagttctataaaacataacctaataacattgttaattcagcacctactcaaatgcattcc  
ctgaattcactctacgaaatgaaccatagaataacatacatgtggagaaggctgttgatttgcactgtacagctgctctgaggcagaaaaggcc

tctgatatcctccttaaagaacccattcctgttaattaattgctttgtccaaggtttctatgtgttcacttggagaaacgttggtacctaagagg  
ttaaatactgttagtaatcagtcacaactgggtaattgaatctcgactcttaaagttataatttattaatattttggactactaaattcgcgttgaag  
aaaacaatagaatacgaataatgagcgatttcaaaagatgcaaatattctattaacttcataatatctgctcaaatatgtatttctaactcaa  
aaagtaattagaataaaaactataaaactaaaggctgatcaaaaatcccaagatacgcataataggagttccaactataagcaaaagcaaaaacg  
ataaagagtagctggattccggcctttaaanaaatcggaacctttagatagcgttttccatttcatttccatcatgatagcagtcatttggg  
aaccactagtcggtaaagccattgcaatactgcacattagggccgcaagccatcacaagatacgaggatcggggtcagttaaccgactgccga  
cttcatggatgaccggtagaacaatcatagcagctaccatattgtgagacgaaggtagctacaaccagagtcataaatgaaaagactaacaatac  
tctgaacgtgtctaaggacgacacagcatttccaatattaatagcaatcaactcaaaaagtcggacgatgaaacagcttggccaaagcaaac  
ctcccattgctaataatgataacgggtccataaaaagtatttaaaatcctttctgcaagagaccggtaccaaaagaagataataatgggtataaga  
gcaatcacacccatattcccgaagtttcatctgaccttctgctcaagacaccaaagatgatcgtcgatatagttacaaggagatgaaccactgt  
gttttggtaaactgtctctgcttggcgcaatctggccaggacaacacgctctgatgaggaagacagaacaataaaaaacaaacgcccga  
agataactactgtgcaactggattgaaatcgcaaaccttaccatccaggtgaaggatccatgtttttaaagcaatgatgttctgaggag  
aggcaataggagaagccataccaccaatattggaggcgagggaatgcccataagtaataatcttgcgcaaatcagactcagctggtaaatcct  
tagaagaggctgtataatggaaaaacagagaatgggggctgcaacattgctaaccatgctagcaaacatagcaacaacatattcatcagc  
aacacatttcttggtttctggccagatgggcaagaatagaagtggccagtcgttttgcgatttggacttacttagcgtccagcaattgtaaac  
ctcctaagagtaatacaatcgttggattccacatagaaccgaaaatgaccttggatttcttccctggtaaagaggatccatcatcagcacgta  
aatccttaaaaaagaagtaaggaaagggacaaggaaagaggaacgaaaagaggaatagcctctgtggcccacagaagggaaccagca  
caagaagtccatacaattattttgttcttattatcaattatcggaaaatcaaaatagcaataaataacataattataacagcgagagtgagaa  
atgtagtgtcaaaaaaaccttctaattatattctccgaatctagatggatgactatgtatttgaagcataagcatccttctgctgacgac  
agcgactaccgattgaagaccagaaatgctgagcctcggttctacgctctattgcaatcattcccgcaaatagtttcttccaagcaac  
atattcacgaagatgacctggaaggctgcaatagcgacaatgtatcacctgacagcataactggcgtaccattcagccacttatttaaacg  
ctttgtcaacgagtcacgaattcagagcggaaagggtatgcttcttataacgcataaaggctcacgcatgctgcttcttagagtcttctca  
tacttttgagaatcttggagaatcccgtccagttgagctgtacataggacatgagatcgtgaatggagatgtataactgtgtgattttccgtttcaa  
agaaacaaagttctcataagccataatcagatggatatttccacaagtaaatgggtatggttctgtatcttctccttctcatcatcatcat  
cgtcgtcatcgtccttcttatttggggagcccaatagagacatccttctgagaagctgaatctgaatgttcagacttaaatatagcagtagattc  
agctcgcgatatagtcggattactgaggttcttctgctgctggccatcgttcatatatacgtggtgatcagagggcggtagaagttggtaaatct  
tgaccgttggtagagtgtgatgttcaattgattcttattaccttcttgaactgcgactatcacgaagaccatctcattgccgcttcttcca  
aggtcatactccagtcacatagtttatactcagaaccagcttcttaaatgttcttcaatttctgcttcttgggctatagaagcttactattccat  
caagatcttggtagactcaaacgaaatcgttctccagataaattgatgttgatggccaagagtcggtttctcattccacccttgggatgg  
aagactcactgtcagttcaagagcataaatccttccaaaagttagcttactacatacacacacttctgctgctggcagcagtcagaatt  
gaactgtcattggagtgctcaacacaaaactccagcttcaaatcaaatccatcttctgatacagtttctttagattagagtaactatttcc  
tcatagctgattagcaaatgtcgcaattcagcttcttactccaatattcaaacatagctatatacttccgaccattccggaacggcgt  
tgaattgaagactacacacacacacattagcaattgtcaactaatttctgcttcttatactgtgactaaacttcatgaaagacagtg  
cttgcattcaaacacgggaaaaagaaagtaattgaaatgcttagagaagatgtaacataaattccaatttcaatggtaatttaaggattttcc  
tgaatgcgcttgttattggtaaaatgtaacattggcttctctatggatgacaggattgtcatatagtcactcgtatgcaatacgtaatctgc  
aagagtagcaaccatggcttattatgaactggcaaaaacagcattgttggattgaattgtattgtattgaggagagttagaacaaagg  
aaaaagatactgcttataagaaactgattagttaaaaggaattctcctttagggaggaaatattgaagaacgaccggaataggaaacg  
caatgaccgaagtgaanaagcccaagaaagcggcttctgaaagaattcagaagagcggcttctgacttcttaaggatgtagagga  
cacagctgtggtcaatgacgcgttaagtcttcaggacggatggcaacgcggattccagaggaaatcctgaacgataaaggcatcaatgaagca  
gtgaaattggtatgttggatttcttccataatttaagcaattgacaattcgttgggtgatcagaaactatagaaaaaggactagcaatttga  
aaaaaactgacattgacataaactaacgaattttagcttctcagaattacaactttaggttcataaaacctatggcatatccgtatgcgaaa  
agcgaacgcggttcttgaactccagaaggactgattgttggctgcatcttctgataatttgaacagtttccaagtagaaacgattg  
tcatgggagacgtgacttattggcctgctgtattgacgacttaccgctagagcctgggatgtgatttttggttcattatggccacttctgtctgt  
tctgttgacaaacacccatcaagggtctgtacgttctgacattaaatgacctaggtcacatcattgcgttcttgaagcaaatctcctg  
ctaatcaagattagcttcttgggtacaattcaatttgggttcttaaacgattcagagaacagctagagaaagtagaggaagatggtaagg  
gaggctttattcagtcattcccaagccaagccttctctcctggtaagcttggatgtacttctcacaactttagatagaagtttagttgatcgg  
ttgtttacattggatggtcattccactggagctgtcatgattgccaaccctggactcccggcgtatcgtacgatccatactgcatacctta  
acaattgagcttaccccacgaagagatgaaagaatccgacattcggcgtatgggaaagccagaaatgcaagaaggttgggttattcagg

gcacccttggcaggcaaggatcaccaaaagtattagaaaacttgaaaaaaccttgcgcaagagtaacaaggattttgtactgtattaatgtca  
gagattttccaaatcgtttagccagtttacggatgtggatgcttgattcaagtcgcttccccgattgtccatcgattgggggtatgctttcca  
gcacccttttgactccctacgaagcttccgttgcctttcaagctgcaccatggcttgaagttatcctatggactttacgacgaattcattaggc  
aactggactcctaacaaccctgaaaaccggcgttgcctacaagaagaaaaccagagcgaacttctgcataaaaaaaatttaaatttaaaaa  
aaacatcaactcgacatggatgaatttcgatcctcaagagtagttcagattttaaaaaacgggatgaagttgttgaatgaaaattacag  
gatataaggttatggtaattattaataaattttgggatgttttttactaattggataaattcttactggctactcagctaaagagtcgctcaga  
aatgaatggtagaactcagagtagctaaattgaaagtcttatttgaacttattactactcaattagtgcccagtaatggaatatttcatttc  
cacaattctcaaagttctggccttgcagggcatatcattatattaccaagttcacttcttattgaatagctgcaacaacccaaacttgc  
tgaattcttgtttgtttatattttcataaagtaggtatttgaagaaaacaagagctgaactgctcaagcattgctttattcagcgtttga  
actttcaattctggcaacgaaattgaaaaattataacttgctatcggtcaataagatccaatataaacgactttattagcatttataagagga  
gaaacgttatttgcgaaggcttccattctcaaaaattattgtttacctcattctgctgataaacggctatcagtcattctattgaaaatatt  
acgaacaacgatcattattctaaattctcaggaactcttctattataaaacaagtaaaaaatcatggaagggatgcatatgaattccaccggg  
gacatccctatcgaatagactttgaaaactatgctaatacatatgacaataatcttgggcacataatactgtatgataatagcttatgctttatt  
ctgccaaccggaatcgttttggccatggcaaaaagtaaggccatattccggttcaagtacatgtcttattaacccctggttgatacattttgc  
tcatctttcaccatcatgctctcactgattattacaagggaaatattcatgctctgtaggaagggtattatgtggatgacatttctaactgc  
ggtcttggaaattgtacggcttttctcaaacgtaagcttgaagggttatgtccaaagaaccagttatcaccagttgatggggggaga  
acattgcatcaatgaaaaacagtatgagttatgatgctcttctagaaaatgaagatactcaagaagatctggagacgcttgcgaaggtag  
cagccgttaggaataaaaaccagactttcttttaccatatagaaaatttaattggtaggaaggaaagggtgttttctaacagtattaagttat  
accacaagactttaggtcatttatggtgtacatggccttttcaagtttactggaattgttttacttgcgggaatctcaagggaagtcattgtt  
ttcaacggccttgcactggattaagggtggccttttcttggtaggggattcttcttccgggaataatcttgggtcttttctgagtagtggctggg  
cgtggaaccttgcataaaaataagccaaagtggacttgaagattcatacgaagtaaggaaatggttgaatcttccattctgttacttatggga  
tcagcaacgtatggttggagcatcttggtaacactgacggaatataggaatcatcacgatatgcagcatgtctctattgctttatgcttggggg  
aggattatggtatgctagtgaatcgaagggtgttcgagattttgaaactagcttgcctacgattacaccaatctcctcatgaaagga  
agccctgctctgatgagagttcctctgtctcgttgaatcttttctcgcgataacgggtgttttctactggcgtcatgatgtcctctcacgaacagaaa  
agtcaaatcaacagttattcacgttcttggggccgattgcttgcagccgagctgttctcgtcgtgcacataatctactatagtaaacga  
ccaagttaccatggccaactcgtctcaacagagattgttaacagttttgcttaatctcgggaggaatcatgtttatggcatcttctacgatgtt  
gtaaaaaatccgggtgaacgacttgcctgctatgctgctcatgaatatgtgtgttcttaacttgatcataatgggtcttgaattattctactta  
ggataaaaggatagctcatgcaaaaataaatttaataataaataaataaataaataaataaataaataaataaataaataaataaataaataa  
gactttattcatttgcgaaacatgttctcagtgatcttacaagtacaagaagataattaatgaattgagaaccaaccaactaattttagat  
aataatgaaaaaaactctagaagaacaaaccatttctatttttcttcttcttcttcttcttcttcttcttcttcttcttcttcttcttctt  
gatagttttcattttccataaaaaaacaaaaaacaaaaaacaaaaaacaaaaaacaaaaaacaaaaaacaaaaaacaaaaaacaaaaaac  
aattagataatcggattttgcttacgcttactcggcaccacataccgacattcgaatcagtgataaactggtaaataaccactccaactttg  
cattccggtatattataaaactctggagccaattcacgactttggctatacgggtccaaggaaagcgaaggaaagtcaggtgctcagatgga  
tagccagcattataaacaaggatattaagtggaccatagtagctgaatgtttcaaaggagatccttacctggccttctgaataagacgagta  
tggtttacattgtagttcactaaggaaatggcctcagtgaggatgcaagctaccagcatgaacgagcttaaaaaaagtaggcatggtatct  
ccatcctagatattttatgaccaagaatcaaaagaagctggagcagaatgttcaaaaatgcaaaagttgtgagagggagttggcggacaaa  
cattggacgaaatgcataaaaaagagttgaaagtcaaaaaaatgctttccaagaacattgtcgaataagatgagttccagagtagtcggc  
aaatctgttccatgccctgcagccttgatacctgtgatgctcaatattggaaggacgaaactagcagagaatggagcactacaggaagatt  
tgcaacaagaaaaacatgcggttatgcatagcgccttaaatgcaagattgtgagtaagttcatggacggctaaaaaatgttctgattgcaaa  
atgcaccaataaagtacgagtgaaaaagaactccaattccaagggttgtatttccaacaagtagcgaagtaactgaataaaaaacgac  
agagagaactaccatttctgttttggctcatatccgtttaaagcagcaacctatattgggttagtaactttcaaaaaaaagcattgacaagag  
caaaaaacaagtgagaagaacaacgtcaagaatgacagaacgtccataactaagggtcttttctgtagctcctaaagcaagtgcg  
tgattattcaaatcatacctctggatgagccttgagaatggcagctcgcgactttgtgtggttctcctgtatgtccagtaattttatgatctt  
tagatgcattcttgaacaccttcttggcgattcggagggaccattcattcatgctgagagtttctcagtcattcccggttttaaaaaag  
acagacgaaaaaggatagaatacaaaaattcaccaaatatttttaaaagagaagaacgattctacttctttacattcaattggcttcttag  
ggaaaatggttaactcaagtagctacagtgccctttagtggttaagatggaatatacggaggatagcatgatgaaatccaaagtaga  
agagaatagagcggcagttccagctttctcagctttcttttttttttttttttttttttttttttttttttttttttttttttttttttttt  
tagcaggaatggaattggttgaacgatccatagctacacaagcggggtgtaggaacttccaagaaggataaaataaaataaaatagaaaa

aattcagtaaaatagattcggaaggactcctgttactgcgaaatctgaagtcagtgaactcggttcgaaaatcctcaaaaagcaagaaggct  
cgataggatatctaagagttgaaatggaagagttgaattcttatgctgtgatttcgttctcatatcgctctgcatggaccatcatgacttgagca  
agcaagcaaaaacgcacacgttcattgtgagtcagtttcaggaaaagagtaaattatgtaatgtttcgctgatgcatgatgcttatgattcatc  
ctacctttttgttccaacatgaactgcgatggtcaatgcaaaagccgtcgaacacattctatgacggctccttcttccaactgaaatcgatttc  
ttttcttttcttaacaatttataagaaaataaaacatcgtgttcagttcctttcgattgagctatctatacattcactaagatctttctgtaggct  
gctttgctttggaattgtctttaacaataccgatttttccaaagaaggctcttaattgatcctgttttatttcttcttataaagatcttatag  
cattctatttcttttttttggacttgctcaaggaaagcattgaaaaaataaaactcctttgtttgtgtgctgctgctttaccgttttctt  
gtcaaaaatttgaatatagaataaactctttaaattagaaaatgagcgtgattaacgatgatgtttcgaaaaattaggaacttacatgttc  
aaggatacacgcttctcgatgctgtctcctcaatgtgaaaaggtttgtgactttcctaaggaaaaattactttttttgttaattaagacttgat  
ttcctttgctaactgcaataggttccatgatgaggttgcgagaccaacctatgtttgtgtagcttgattgaaaaacaaaattagaacaatca  
aagaaagagctacaaaagctgaaggtcgcaccagttatcctctccccctctctccagaagccttagtcagaaaggcgacgctgtacgaca  
acaacctccttctcagacaaagtctgaaccgcacaaaaccagcaggaatagatcatctcagcaggagcaggaatctgtctatgtgaagctta  
tcgatgagttagaagcccagttggaagatttctcccattcctcacagtgaatgccgaggctgctttcaacgaatcgaacggattctacggc  
tcatcgaactcgaaaaggattgaaaggaaaaataaacaaaaatgtgataatggctcagtaattgtcaaatcttcttatcttttccacaa  
aactatttcttagtgagattgagacacttagtttagagttcagtaataattcctaataaaaaaacatttaaccaagaatgcaaccata  
ggcactactgtttctacctttgtactcgttttctttttgtaattctacctatcctttgtttattaacgattgttcgtaaatatattcgctactccacc  
gtaccattgctatgtgggatattagtagtaattcaatccatcctttgcttacaacaatggctagaaaaaatccagaagcaattctgtgaaaa  
atcaagcgaaaaatgaacaaccgtaaatgagcgagagacagttgatgccattcgcacttatgacgatgttgcgattctgaagatgagtttac  
aaggcacaggacaaaattcttttgatggcgactcaaaagaagaacgcagatgaagacaaaatgagtcttagtgacgaggaagtgctggcttg  
aaggatctagtgaagatggcgaggaagctgtggaaggggcaactctgatgaagatgaattaacaggccaaaacaaaggaccagttgatg  
aagaagaggttttgatgagaagggctggggacgttcccaaatctactatggaggcgacgattatgacaatgagaactatgatgaagatga  
tgaagagttgatgctcgatggaagagcaggaagcacttcgcttcagaggaagcgtcttgaagatgactgaggaagatgctgttgacgat  
atcagccagtgggcgacaaaagcaaggttgattcttcaatacgaagacagttggctactgtcgaacaactagacaaaaaatctgccaac  
aatgcctcggtcagaacttctgaagattctacgtaccaagaatccagagtttagcttttctagaagaatacaaggatttaaaacttcttacga  
agaattgaaagaaaactagacgctgcctacttcttctcaagctcaagtgaacgctttgggagcatatagcttttctagcattttatttg  
ctcttttacgtgggggtgaagaagatataaaaaatcatccaattatgactgatctcgtgctgtaagcaaacctgggaatcctccgcgacctg  
atgatattcaatacccacctgagctcccaggaacaagctgcaaatgataagttagtagatggaatctccgaacacatgagggagatca  
gaatttattcgatgaggatgagctgctgaggagctgatcgtgaagaacctgatataatgaagaagcttcatctggcgctgaagaaaacgag  
gataggaagatgatcatcaatcctcaatctcgagaggctaaagccaagggcgttctaaatctgttcacaatgttggtgattatggtgaaggtctt  
atgttgactcaatggatgctgaagagaagctacaaaacgacgctcacttagttttacgcaaatcagattgaccagaaggcagccaagcgat  
ctagagctcaaacagaccttctggtgatgctgacattccttataaggaacgtctttatgaacgtcgccaacgtttgtgagagaagctgctgctg  
tggacaagacaaggctcaaggtgctgacttgacgaagaagaacccgagaatgaaggttgccttcaataaggatcgagaaaatgatactac  
tgatcaagatgcttagactattataactcgatattctcagcttaagggtgaaaaacgcaagagaaaagaagatcacgactacgaacgagatt  
tggtacgagccttagaaatcctgaattatttgaacttggtgagggagataaacgtggaattaccagagacattgctacgaatagaggtctcacc  
ccccgtaggccgaagagaatagaatcctcgtcttaagaacgtatgcgttacgagaaggcgaagaagaacttggtagcaaaaaggccatt  
tacaaggtcctcccaagcataactatggtggtgaagaaactggtatcaaggcaggcctgtttaaagtattaaattccaataggtttgattgat  
ttttgaaataattcaaaatttggttaggttggtttttgggacattctgagttatactacttaattaataaaatattctttaaattggaaggtgaac  
ttttggtacatgttgatgctgggtaattaataataatcttttgacccaacaaataagatgaaatcattaagctgttataaaagtctaaaaaa  
gtgaatagttacttcttagcttactaccatgtaaagtcttcaatgagatagaattcatgaactcctatttcaatgattatctacttttcttag  
aacaatacgaattgaataataaagagatataaagtagttacaagaaaaatataatttttcttgaatttattcaattatataaataaatgct  
gatagtaaaaactatcaagaagtagtaaacgatcatatgtcaaaacatggaagtaggcacggttaattaagcattcttaaaagaagtttagagct  
taaattataatttaacaagaaaaagaaagtgaaattagaataacaaaacggaagaacaccaaggaattatacagatattataaacca  
gaagccattatttgcaagtcgaagcctaagaagagcacaacgtcctgaacatactgtaagcatacaagaagataacaaatttaaaagat  
ctacatcagaagggtcgtaatccaacctccaccggaatagcattctttatgaatgttataactggcaggggagttgtcaattatcatgatagc  
tgataagtaattacatagcttatgtcttcaaaaagaagatccacaagctacagtctgtcgataataacgcttcacaaaagcttttta  
tctcgttcaaatagtcgataatgggatcggcataaggctgtacggaagccgtaaacaaaactagatggaacctcactgacattagtaagga  
agtaatacaggtgagggcgtttgtatagtagagaattggatgttcaccaggaacatgaactcaattggctggccagaggtgattctactac  
ctcgagaaacagaatggattaggttctcgtctaaatcaagcactaaggctcttctggggagtttatttgagagcaaggccttgggattctgctgg

cgcaaagagtgatattgcggatgcgcatatgagatgcagaaggtgacttgaatggatcattaattatggtaaagaagcggaaacattggggcc  
atgagatgggtggaagaggaagacgaagaaaagcaagacagagagtttggcttttagtaggactctgagtggttacgaattgtggaaggtatt  
tcttctggaggcgggattatgggatcagaaaacggaatgatgtcttctcggtatggaatccggaagagcatgaggggtgagggaaagcgtatg  
ggaaagaacgctggagtcggcatgaaagtgtgataagggtctcggtgaaaaagaggagttgaataagaagagaacatctgggacgcttagg  
acgagtactgaggactctttgacgacttaatagaatgaaaggcaggaaagaagatgatacgacatagaccccaaaaaaacttaaaaagta  
actttttattttcgttgacaaactgcctggagattatctttatgtctggataaacaactgatagatccgttttaataatactgaaccagatgca  
atcactcgcataatattggcagccgaacatgtgtagaagtctcctcgccattggaatcttttctaaaagagtttggaaatcggtggatgcttag  
cagcgtttcaatgggaacttctcctcttctgtccaggtgtcaccttctgacctggcatctgcaatgcatcttttctgcttttaggcggacct  
tctacaggcgtagcaaggatggctttgtaatttcatctgatattctgcaatcgaattcattccaatggactccaacatgcaaatgcagaattag  
atctcagatcaattccaaagaacttttctagtcagaactaatttactactaaaataatctgctccaagattgggtttggcttagagaaggagtaa  
catgaaactggctgctcattcaccagtggtacgactaatggatgagggcagaagaccatgtaactagggctgagcgaagtaacagttggcga  
gaaatggagagacaacgatcctattcgctcagcttctgttctggatgagaacacaaatgaataaaaataaaaccagaaagaagatgtaa  
aagggtcgcagaaccggtgcttctgatatacaaatatcgaatcgaatcgaatattgaaagtgaaacgagagatggaatatacggca  
gatgacaagcgttgagaaggagaaactccagttgacggaaatgacttctttgagcagaaaaataagtacaaaagtgagaaggagcacg  
accatctttgttcatatattgtttatgttacttgtttgttacttattcttctgctttctggattcaaacctatttgcactgagcagtgctca  
tacagaaagaactgacctcattgtcaacatggcctattgacgcatccataaaccttctgttcatatggactatggtttagctgctgca  
caattactggatccttacggaactcgtcttctgagactatcgatcagaatagatggacgcttacgcgttttccctcctacaggaattggattgt  
tccaacaaaatataatggaaaaatattacctgggtgattcacttaccgcttccaacaaatcgaagctttcaagtgaagctacgtcgtagcgtta  
agtgcgaacgatcgaatccgtgcggacggtattttccactttatccccatgaaattctttatcctttgagccgtgaatctcatctcataacagaagc  
gagcaaagtgttgacgcatgggtcatcaatacctcggcattggagtccttctctacgcctcagagtcgcttctctacacgatgctttgcttt  
tattcaaatcaacaggatgaaggaaccttttctctacttgcacaccttacttggatgtccaggcgacctgaaattacagctgcatg  
ggtatggagtcacaaccctttcttgaagtccgacattttatctacatccttcatggaatctcgggagccaattttgaggttatgtttg  
gtcctgaagcatctgcgtctttatgttgaacagctactgaactgttctttcaaatcagttatcacattcttttctgacaagttgattctccc  
acttttatttccgcaattcctctcgggtttttatgcaaaggatgtttatgactccgatgcattgcccataatgtctcgcacccctgatccttccct  
tttggatccatatctacatctggagattggaaaatttggcagatactagaggatgggtaccgtgagatattatcaggtactttccatgacacttatg  
aagttgccttatcaagtactgaggaagctagcaaaaacgatgagaacatcaacaagaacctcattcctcaggatataatgtagaataat  
tgggaatgcttctcctttggagtcctacttgcacaaatgaggaggtgtgtccattgtctcctcggagccttctactccacgtctctgtacaatgc  
caagaaagatcgctattttgcaagtttcatcggagttgctcccgtgagatctgaatttttctgttaacaacggattctgtcatatggatggatctt  
cagcagcccttcagccttattggtttgaaacatcatcgaacacctgatcctacttctgaatgacagtttgtctactttatagaaaatattac  
gttctgtatttccaataaatggaattattcagcaattcactttccaaggatagaacgcttctgttcttctggaccacctttttacttttaa  
taattgtgaaatcctgtcattcattacatctacagccatgctattcattgatgtcgaatgatcagtccccgaagagctgactttgactcgc  
cgttttggctgcaattgtacaccgatccgatggtcttctgactatgaattgttcttggaaaaagctcctcggaaatctatgaattacaagaggag  
aatgactcgcactgattttggcatctctgaagtattgaaactaatgatgaggaaaaatagactttgagaacggcgaagaagaatgatttt  
tataaagcttattgtgcatccttccgtcaaaaaattacaaagtggctaacttctgaagcatacggctgaaagtcaattcctttaaagcttattc  
ctcacgattacaaggagatgcaagtaaccaccattttccaagcaagatgatattaacttttagccgacttaatgcgggacaataattctctct  
cgctttggaagtctgaatgatgttgtgagttatatcaagggtactgtcattcctaagcttaccacaaacttgcgaagctcgaactgccgctacgtct  
tggatgatttgcatgttaaagcacttctgaatgatttatccgagattggattagccattatcgtcaatacaaatttaagtcgacgatggatt  
tacggctaatgctgtatatcacatcattaattgtgttctaattgtcttcagtcggattactgaatttcttcttctcgttgagatacagacctga  
gtcttctgaaagtacagagctatcattcattcacttttcaaacgaaacagcctgtaaaacttcatgaggatgcgagtcgaatgcttaaaggatg  
gaatttagggaaaactaccacatacaacattgggtgactcagctgtcgatatactgagccattaaccagtcgaactctgacttcaatgaacc  
ttcattgtcatcattcgttctcgtctagtcagattgccaggtgcattccgaagatgtgattccaccgtcacaatcgtcatccttctgaaatctca  
agtccaggctacccgattatgtctcaagtcgtgacgggtaagtttgggtcaagacaaaaagaagaagaagaagtggttttaatttttgg  
gtcacctcaaacattcaagactgtatattagttctggcataaaacttaattatgaaaaataatgatggttctcacttgaacgcatactaaat  
tttgctatggatcttaacaattattagacgttgatttaattttattattttgatgaagttacttttcttttctgcttttggatgaattata  
tcattcaacaagctagtcaccactaaataagcttctacattcacattttctgtaaaaatacaatcacattatcacttttagatgggttgtgagcc  
cctaatttatcaacctgagagtggtattgaagtattcttgaattgaacgacttccatgtaaaaataaactgctgctttgttaacaggtactgc  
ccaattagaccatattccataagactttattcgtatttatattggtaggaataaagtgcttacgggaaaactatgtttttatacaacagagcct  
agtacgacgatctttcagctgttccaacctacagagcatatacaatccgttactttggaagagtccttcgcccgtatcaacaagaatgcattgac

tcatgtatgagggcatttcaagcaggaagaaaagggttggcatactctggctacaggatccggcaaaactgtaagtcatattcaaaagcacc  
atcgtaacagatgcaaaggctcttttctcatcttattcaaaatacaccggaattgagagctaatacgaatcaatgtctaactctgtacatcga  
cgagaacttgctcagcaagcctatgccatctgttagaaaatttaggaaggaagtaagtcagactctatgttaacattaatactataata  
gagcgtcgagattgacatgggcacacagcatgctactggcaatgctccattactgtggcatccccatgtcactaaagggagatcggtagaga  
aatataatcctgaaaattcaagctaattattgttgatgaagttcatcatttggcagctcccactacctcgagcttgaaacatttcggggcggac  
gaaacaaattcaaaagtctatttaattggctcactgcaacattttatcgtcggatggaaaatcacttagcccagggcttgacgagattgtatc  
ataggattgatattactgtgaagcttgctgacgcttatagacatttgggtgatgataggtgaaaactgtaagtatatacttttttagtcatt  
gacgtttattaactatggataaggctagttcaacaaaagtattggtgtagaatggcaccaaatttaaatctggcagaatcaacagatcgtga  
agatcgagaaaagttgaacgtgaagttcaatcaaaaactgccattttcaaatccctcaggcatggatagaacatgctagtaagtcaataacc  
ttagcaacacctggcctctactaactttaatagaaaatcgttctcgacacttcttttactacaatagaactcactcaagctgtaatgc  
tttctgaaaattagggattgatgctagggttttatccggctgaccaatcctgatgaaaggaaattattggtaacaagagtccgagagaaaaggtt  
tccagcttgtaaatgcatggtattgaccgaaggctgacattcctaataattgattgcttattattgctcgaccaactaattctcctaattattg  
acacagatgattggaagaggttacgctatcgctgtaagaagattgcttgatcatagattttgacattctttccatcgagctccctctcatat  
gcaacccacgctttctggtataattgaatttgagacatctccttactccaggagacaaaggagaccaactcagaagatatcaactatgatcctgg  
gacagttggtcttcatagcacgcttcattatagaaaggttcgacaactttccgagcttttaaggatatggaaaaaacgataacaatataatgc  
tatttaccgaatgcatgggtacctttgaaattgaaccgctatgattgtccaaaaatcaggaacacttatcgttgataccgacattgaatcagg  
aaagtttaataaattgcttacgagaagcaataataggtaacatacctacaacagaaaaaagtagtaggaaccaatcagtaacattatg  
atggcaatccgaggagctgacagctatgttgaaaaatacaagttgccgtccgcttttattctaagaaatgcctctggaggaaaaagcctgcttat  
gattccagaaaagaaatattaaggaataagaaggttctttcgacgaagaaacttgaagctggactgctgctgatgattactagactaatt  
catggaagaagactatgaaacggaaggatcagttgcaaacatctgtcaaatccaggccagattggacgcttgaaagagtttaaggcatatg  
ttcggaaatcataaacaagttatttttgattcattagaagactttcgattataattattttacaatgactaggatgaccgattatacag  
acattatttctatttagtttaacctctttgtttctagatcgagtttaataaagatgccaattttgctccaaccagcagaatgaaattcctcaa  
actcgaagcatgcatcactgccaaaacgaaatccccctgttgggtacgaatcaaatccacatagagcttccctccgatgatgggcaagg  
tcgtgtattacagatctgacataaacctgaagatacgtcctatcaaaaaccgagaaggaccaattgcaggacgagaaccccggttcaa  
cagttacctctaatctttctatttttggttcatttttctgtctcctttctctctgtatgcaactttcgacagaagtagattttaca  
gccgaagcttctcattagaggattttgctgggaattttcattgttcttgacagagtcattattacagaccgctgtaattttcagccttt  
tcttctcgaatcagggactgggcgcaagagttcttctgattcaatctctcttctctcgaatgtatcagggctgttatagttatgttgacccttct  
gtgaaagtctataagttcaagatggtcacatcgatgggacgaggtttacattctcgggtaggggagtccttccgggcatattcgtaaagacg  
tttcttgaatatgtaaagcagaataaagtgaggatgaagaatgtcaccacgaaatgctgctaaacatctgcaatttcttctgtaggg  
attttagtagcgacgcggataatttccggatgaatcgaagtatttggagcatcaaataagcaggtggtttatactgttttacacaagaca  
atagtgctggtaactgtttgtccaatgccaaagcactaaaacgctgatccagaggatcaagagtacccatgtcctatcttgatc  
atgctgcttccatttctgcttggctattttatcattggggtaggagggtctggctggaagaatttccaatcacttctggaataatcgctta  
atctataagatagatgttagtagattctagtttataaatgctacagaatccagtatagacaggaatttgcactctctgtcaacgggtca  
acatccaaggaggttcttaccatttaagcattgagctgaggattcccagatggtttattgatagcaaccaatcctcccttcaactgtaagc  
aaagcaatgtctgacttacactgggagaaatgattttgttttctataaacgcaaaaacgcagcagcgttgatttaacgagctgactcaggc  
tcgtattaccgttttctgctcactgtagggtaggggtttttggttgactgctgttttatgctgcaaaaaagtgtaagagacagaaggtgtc  
aaattctcgtctacagaaatggctttcgttaagcaggtcaagagcagcccttacttctcagcttccaacgaagtaccgctgctgtaggggt  
aagactgattattatgctcgaagcagatctcctcaagcaagaacaagtacaatgcccccaagatcgtttgggtggcttctcctaaccgtt  
tcgtaacctccaagttatcttctagagtaacaggctgactatgttctgtctgctcactcttctgagcttctcgctacggcatcaagtgaggct  
tggtaactggtccgctgcttctacaccggtctttgtcgtcgtctctcatcaagattggtctgctgacaagtatgagggtatcactgag  
cccgaaggtaattgaactcaccgaagctatggaagcagcccccgtccctcaaggtttcttgatgctgggttgaagcgtacctctaccggtt  
cccgtgcttccgtgctatgaagggttccgatggtggtttatcgttctcactcccctaaccgttcccgggttcgacgttgagactaaggaat  
tggatgacgagactgttcgaagatatactatggtggtcaggtgctgaatacatggaaatgcttattgatgatgaagagcgtttcaaaagc  
aattcttagcttgattgctgacggtattgagagcgaactgaagacatctatgctgaggcttccgaagatccgtgaggatccctctgccca  
aaagacaaaggacgttctgctatgaaggccgaatctcctcaagtaacaagcaaaagcttctgggtccgaacgcaaggagcgtttcaat  
gccaaggtgctgctgctgctgtttagaaaagttaatttctgttttacaatactataatggtttttgaggcattaaccagattctgtttta  
cgttataatcaaaagtaagtaagtgtagtactttgtaaagtagcattattacagaaagtaaatgtcgaactagggaaaagccttctgacttg  
aaaatgcttatacattgattagcaagtgtaagcgggtgtaagaatgtatccttctgactgtgtccattatggctattacttgcacttaaatagt

cttttctgtctcatatcaatagactaaaaattcttttcgtagtactagtagtctactgcgtccaggtttgccaacagtaacatcattcccgcatt  
gtgtccatcccatcttgcaaaaacagcgagaaggatctatataatcggaatcaatctcaagcatttacttaaaaaacaaaacgaagagggtatt  
cctgtcgtcagccactttcaagtttaattgtatctcattgtaggagcaaaaaagattttcttatatggaccgcaatcaatctctcgtaaagtatt  
aattcatctttttgataactcaccatttactatagctcttgatcaatgcaaatcctttctctcagataaaaagaagtaaatgaagagttgcataat  
ttggacggcagacatgaccttcaagagctttcaaatgagaataactacattgaaatggtaagttgatttcgtaaagggtttcattaacatgcatag  
gatttggctctaggagtcttggaagagcagctgcaaaagcatcagaatatcgaagaagggtctcaagtgctgaagaacaagatggcgaagtag  
aagcaaacccgtagagcatctcttgatatttatcatcaacagatacaaggttcgtcagaacggacactaccttgacggacttcttggcgaaa  
aacttagcaaaagctgctcatgctgatttagagcaaaatccagaagaatcgagtgaaagtataatcgtaagttgagacaaagactacaaaga  
aactctaaataaaggagaaaagaacaagagatttatgttatgtgtaagaatgtacaaaaattcattaccggttaatatgtataagatatagttat  
gaccattttctcatatattttgaaatcagttttggttccacattaatgttctgtaataactctcaaaccaatcagcatcttctctgaggaatgcacagt  
tgggaaaggatatcgggaaatcgaacggctcaagtaatctctgtagtaattcagttcagatttctcccgtcgaagaatctgtttgtaataa  
gtagcctttcaaaagtatttctttttgtaaacttaccagctactttgagaagcatcttgaggaacaacgacatggagagccattgaatcagg  
aacatggatgggtcgtaaacttaacgaatgtgcgcaaatcgggctaactatcataacggaaatatcaggatgacaaagcgaaccgccagccgc  
cagcttgttgattgtagcaagagcaattctcataaataagcacttaccgaataagcagtcgatcctgttggtgtagatacacagagtcacatcagctt  
ttacagtctcaagtagcttggaaatcgacgtataacattaatcactcattgtctgattggggcctctatcaataacgacttcttcaaaactacaa  
ggaaatctgaaactcatgtgtatctgtatcggattcacatagggattgtgacagatgattatctaaataataaatttggctctatcttttcttcat  
aacgcggcattcaaaagcaggtcgtaaatggatgtacatttcttgcaaatcttgaatagtgcttttgaattattaatgtcaaaatgtctagcac  
gcttattagcacgtattcgtttgtatagaaagccagacaatcttactgtagttaaagaatcccagagtgccatggcaaaaggcatgattggag  
ggacagttcttggaaaagacggctcgtgtagagcacagttccatcaccgcaagctaaatgtttgtaacataacactaatcttatacaagtcac  
acttactgtcaaaacaaatcaaaagagctgtgaatgtttggtacataataaagtggccaatactgaattcttctgcttgggaacacagattcc  
atactttctgaataaataactataattttcaaaagacaatagccagctctatgacttctgtagtctttctcaacttcttcatctcaggtttcgaaa  
cgatcagcacagacgtaatgtttggatgaatgggctgaatatctgagacgagtaacaaaagccagatcatattactacggagtttttgttaat  
agttcgtgctccaaaccacatcacgcaaaagcctctgttcggttgcaggtgcttttttcgattatcatacagctctgatacataactaaatattg  
cgatgaacagaacaatacggaaagctcccatgatagtcgtttcagtagtgggattttaggcagacatgagtcacgtcaggttccatcaaga  
aaaatattaatccaattatttgaataaacgaatgaaacgtttatttactgaaaaataataaagagcaaaaactacaggaatcagataaatt  
gaggaaatttctaagggttggattgagtgaggagtcacgatagaagaactgacacgtaaacactagcgccttaattgcgagttaaatt  
cattaatcttgagagtattgtggaacgaagttaaatcagggaaagtttcaaaatgctgatattcaatcaataacttgttggtatattcattgat  
aatggatgaatcgacaaacttttgacttttcatcgagtttaagtcttcgaaaagatgtaaggaaaccgctactgacagaaacaactttgttaa  
gttgttttacaacattttgtatagataaaatagacgtttgagacgtttgagacgtttatacggactgagaattaagaacacaaatttggaagc  
aaactgccttcaggttcagatttaacatatacgggatttcataaaaacagcattgacaaattccttcaacaactgcttcatataagtagctgc  
ccatgatcaccttaccgagctagcatatagaaaatccaataccaagtactttttcattcactgcactaggtcgaatcttactctgagagc  
gaacctggcaccagcattagtgaccttaacaccaagagcacgggcttttcgacaattcaacgcgcttgcgagcagagacattagaagcgcac  
tcggcagcgtatgtctgtgtgcatcaataaaagttcgacgtcagcgcaggttgcgaacaaggaaagccttcaatccattgggcatacagatctg  
gtcttctgttaccgtaaccaatcttgggcatgcaataaacaccttgaacggcgacggacacagttgtcaataccttgggcttctccatg  
actaccaacacgggtggaagcagatcagactgggtggcgtctgaaaggcttgggtgcttcttgacaatcttaaggcagccatttcttgggtgtgg  
taaagaaacttttggactgtgttgatgttggtttgggagagtgtgactttttccaccacaacaccagctctctcttaccactacatattca  
gtaatcaagcatttgatggatcatttaaaaaataaaaaatatttctattattattacctaattctttctaaagaattattctactttaactagt  
ataaagagattaattactgggtataaagattgagcggctcgaaagtacgtaagtattttcaaaatttgatggccttaacgctgaaaaacac  
cttctaaccagaacattttctgttttcttttctacttccataccggtccgagataactcctcaacgattaagttgttcgtagaagaattgttt  
agactaaaatattttgttctgttacatgcttcttcttttcttttcttttacttttatgaaaacactgttgattatttctattctatgattcat  
gagtttctaacagacgctaagtcttacgaatgttttccattatcaagttcttgcattttgttgctatttataatagatttttttggccatcttt  
cttctgggtcctgggatattatctaaaatggcccttcacaaggttggattctttcaatatacggcctaaggcactttctctaatggtaaagat  
atattttctatttcggcattcagtttcatcgtccgtctacttcaatccccacttattaagttttataaataaaggcgaacttatacttagatcctt  
ggatattggctgtagccaagctcgcgaatcaggtctacgttgccttcgggcagtgattctaatcctccaagtaacctctctgttcttggagagc  
tagaacaataatggcttcaattctgacactaattggataaagtggattcacatttcttacaggagtcacaaatagctatacctactgttggtac  
tctcaggttaggaaatctttctagtagaatttaactagcatgaatacagatggaaatcgaagaataatgtgaagcaagatgtgaagggttctcgtg  
ttgcttttctcgtagaattttgaaattgtctctacattgatatccagaaaaaagtcacaaattacggatttttaaacatcaatatacaagtcac  
ttcgggtgacgaagtttactctccgtaaaccttagcgaattccggtgctctgtaaaagtttgagttttgttctcagatttggatagtccttaacag



tctcatgaatcaacgacgagttaaaacaagtgcacctaataatagctactctataataaaggacaacattgaagcattcatactgaaactttcag  
aagctcaaatccaaatcggtagcataaaatattggaacgtaatgtaacaggtcttgagctacctatgtttcaatggcaatgacctggttttac  
gcttgatttctgaacatgaagagccctctcatcgaatgtttttcggctgacactattgtgcatcagatattagcgtcgatattgctcttaatgtt  
gaaaactatactccaggtcatctccccatattctgctgaatatccccctagttaccatcacttgcttaacatcttctgtaggacagttcgccattgat  
ccgaacaagccggaaaagttacagaaaagttgtttacgtattaacagtagccttacttctcttctggaatttcgcttagagttactagatgatg  
ttatgtctatgtttccaaaaaccagcataattcatttacaaggcgttcagaaattccttcttataatcttctgaaacgaaaatccatgctgtgt  
atgagccggtggtgctgattcctgatacttctgaatcagaatctcactttccaggaatgattgttgcaaatattcttcaatgtttctagaatthaaat  
acctgctttcgtcggagcagctttttgtaataaactcttctcggcttcttcaaatcatgttctttatcatagtcggaaaacaggaatggttaa  
tcaatagttctgagacgattacattaacttttaagtaacaattacaatgacaatgttggtgctggtgatttctttgaaatgagtttaaaatacgaatc  
gaagaagaggaggttagttaagctttgaaaaatcttgatctatggaattcgcgatcttaagccttcaacggtaaaaatgtgtcaaaaga  
tggggctgatatctcagttcctttactttcaagttccttctggctgaaaagctttagaatacagggaaactcaatttttataattacagcaatt  
cgtcgtgaactatcagatgatcctcgtggcataagctgcatattgatcagtttgatggatcatgtgaaccaagcaatggttcaattctctcgaca  
ctcgcaaatcaactgtgatgagaatgactcaagttaggtctataattataaggacaagaaaacacatttgagcatttgctacttcaattcc  
aaactcagttttacatactctcgtgttttaataatcaagagaactcatctcgggtgactatggaatggattcctcctggtgattttgtcattgtt  
acacaactgttgcctttatatacgataccaaacttcacattctatatagtgatgatacaagcgaatagtgaaagaagaagagctgtcgatc  
atactaagcaagctatagcggcttactttgacttaagaataaccaatactcgtctaaagtttgattggatgacgatattaatctttgcttgatc  
ttggaagattgactttctaagacgtgacgatatgcctttccagaattacatgctaaattcattcaatccatgctcgaatcccgatgttctgaat  
tatgggataaagtattgctctcgggtgattttcgttatcacattacaaatgaaacccctaggaagctacactcagtaacatgtgattatattctctc  
gtattccgcacaaatgtcccttattctgtaatcgaaaaagcctcaatacagtaaaaggcagcaatacgcgtttcaatgatccttcaattga  
ccgcaacacgaattagctcagcaacgaaaaagcctcgtgtagttcccatattaatgttaagtaactaatttaagttgaaactgatgatgat  
cccttgaaacacgattagcaatgattatcgcatggttgactgagcaaaagatcgcaatagaccgttggatgacctttgaaagaaaggttgcgg  
ttgcttctgaccgtaagtctctgatgatcaagcgaatcttctgatgatacctcaagttgtttggttcaacggtagttctgatggtcctaacga  
aggagccacgaaaagggcctccatgatttagggaaaacttccaggatattctaggtaatgaagatggtgacagtacttattcttgaaaaag  
cgaagataagcgaagatgaagcttgaactgttgaagaatattgattccttctggtgattcaaatataagacggattagagaatttagatata  
accgtttacatatcgctagattgattgattggccagaagaaatctcgaaaaaagcatatactttaatgagaaattgatacctataccgattcgac  
cgccgcttctgataagcgtcaaatggttttgactttaccttgacaagccctgcttctgctgatgatctccgaagttttgaaatgtttggaag  
tggcagccgctggattatggatactcgatttattttcaatgtatattgattgaaaaatgagtaaaagccaaatctcgggttagggactatccttac  
cgttgatataattccgaaatgggtcaaatcaagatgaaatattgcctcgtggcattttaagagtaacttattatcaccgagcagcaggcct  
cgcttgaggcaatccgtgatgttacagtgctgtgatttctgaaaagagtctctatctggcataccgtacgcagtgaaatgttactctgacggttca  
cccataaaaacgtttctgatactcaaatgatttaacaccgcctccacgtctggttatggtaacatcctatcagcctgctattacagacat  
aatacgtatctggatacgttcaaaaaatacctattgatccatcggtataggtttttgggacaaaatgaggttagttgctcattcgcatgtt  
gatttctgtgaaagaaaacggagatataatttcttccattaaggggtccaggatccttatatgatacttgggtgctggtgctggttccagttctgct  
ggagtgggaatgtcaagttggatcgcttgataacaaccagcaactttatggttggacagtgatgagttttatctcaatacctgattt  
tctcgtcaataaatggaattcttgaagggcagccattaccaccaaggcagctcagcataagaataaaaccaaattaccttaaaagacatgc  
gatccgtaaaagtgattgcaaatgggtgtaagtgagatggcgagcagggtttatacctgaaaggcactgtaacggattgtaaggtatgt  
aatggtcaattcaagtgctgatatgggactttaaccaattgggaaataaagacaatgataccaagatattgtcatgacagcaagtttgggtt  
tatgatgcttaccgcaattccgaagtcattatattcattgtccctgctgtggagtctccacggatttggattctcaagacacattgaaatggt  
aaagcgtataatcagatacactgacccattgggttttcgcattttcttattggtggaatctgttctgaacaatgtcatattctttgaggaga  
aagcctcttcccagttatgatagttcttctgcaaaaaggttggcagacacttggtacctttaaattctttagaattatcgccgttcaatt  
agccatattgataattacaaaacaaataaaaattggcagaataagacagcagtgcaacagggctaaaagcaaaagtggagcatttctcgatt  
gatttatacagcgttcggagaaacatgagatgaaaaataaagccgttggaaaaactcaagagaccacttccatgctgttcttggccgaat  
tgacttcaagactatcgacttgagagctattactgctctttgatgaaggtgccttagagacatccgaatctatactgtcaatgctcttgatagta  
aagataaagagtcattttcttttaggacagttgaggtccatcttctgggtcgatctgatgattttcatgaagctgactggtattgctcagcga  
aatgaaaaatgctgatttaccctctcgtttttcccaaggttacttattatctcatacaaaaaccgcagtcgaacgaaaaaaatgaaaag  
aaaataattgctgatacttgcgtttttggagatgaaaaaacgaccgttcacgatgcctagtaggaaaaatcctaaaactgttcaatagagctt  
ctcaaaaaacgaaggaggaaactaatgagttcatgaactcagagaaagaaagagctcagactttagaggacctaatcgttctgagctctcgc  
cgaatctgaaagaggagttcagtcctcagaaagagaatacttaccctgaaatgatcactatcgattgttaggattttgttagaaaatcaagaa  
actcttcaagacctcagaatacaccggtaagttgattgtcatatgcatccttctgaaagtgtccatgcttcaataaccggttgttggcc

ataatgtacaaattaagtgaataatTTTTGTTAGGAATCCGTTTTGTcatatgtccatgagatggaaagggtgagaggattcgcatattacatgtc  
ccaaaaggcaatacgtttctgcaagatcttcaaaaaacgccgaattgtctggtgatgagaatgtgggaaattgctctgacaataacgaagaa  
agggaaaaatgccaggtacctcctaagtTTTTACTCGACGATGCGAAGAGAAAAGTTCGTAGTGAAGACCGATGATATTGCTGGAAAAATAATC  
TGATGATAACAAAAGAGACGGAGGTATAACAAGGTCATTATGATATTTCAAAGCTATGCTTTAGATTATTGCTCCTCAGATACAATTACAG  
TGCAATATGAACCCTAAAAGGCTGAATTTTCTATCAAAGTCTTCAAATAAGATATTGAGTATCATTGATCCCGTTTTCTGTCAATGATATT  
AATCATCTCATTGAACGAAGATTTTATGCAAAGTTAACGAATCCCAATTTTTATCGCAGATGCGAACGATTTTAAAGTTTCTGACTCAACGACGCT  
GGCTTAAATAGATACGGTTGTGAAGATAATCGGTCTGGCCTCCTTGGGTCCTTTAGAGACTACATTCGATTTTGTGCTAACCCGGCCGCTTTTC  
AAGTTTTACATCGAGTTTCTTTCTGCTATTTATACGAAGCACAATGATTAAGACTTAAAGAACTGTTCAACAGGACATTTTTGAGGA  
CTGGATGTTACACAGATACTTGACCTTGATTTCCACGCTGGTATTTCAACAGATTCACAGTATTACGACTATTTACAATAGTAACTAA  
CCTACTGTTTACAAGAACCCTCAAAAACAACGCAATCAACGATTGGAAGAAATATGCTAGCTGCCGATTTAGCGATTAACGGCGCACCC  
CGAGATGGTGTATATAAGACAGAGTACACTTGAAGAGACAAAGTTGCGCATCAATTACGACGTAACCTTTGGTGTCCATGCTCA  
TATCGCTCAACAGCTATTCTGCGAATGAGTTACATCGCTGTGGGGAGGAGTATTTATTTGATTGAATCTATCGCAGCCGTCAAAGCCGAGGA  
ATAAATCAGAATAAGCTAGGTC AACCTTAGCTGGTTTTAATGGCTAAGAAGTTGTTGGCATTGCTGGAAGATAAAAAGGCCGTTTTGG  
ATGTTAGTTACAGAAATGCCAATCAGACGCTGAAAATACAGATCTTCAAATTAATAACTGGAAATGAATCCATGAAAGGTTCTAATTT  
AGCTCCTGGTTGTGCTTTGAAAACATCATATGCTCTTACTTAATACTGAATTTCAAACGAGCAGTATTACAACAAAATTTATCGAATTCAGT  
GGAATATCGGAGGCCGTTGCGAGTATTGAGTGGTTCAGATTTGAAATTAATTTGTTTCTTTAAGCTGCAAATAGAGCATGAATTGCAAGC  
AAATGTTGACTTTGCAATTCCTGGAATGAGAATAAGGTAATCTCTTAGCATGTATTCTAACGGGCTGAATCTCAGAAGCAGCTAATAAAA  
AGGTAGCTGAAGAAACCCGGTCTAGCTGAAAATGATACCTTAAAGAATACCTCTCGGAAGAGCTGGGATTAGAGAAACTTGGATTG  
ACCAGGGAAGGTAAGTAGTACATGAAATGCTGAATCGTGTGGAAGTAATGTTAATAGCTTACTTCAAATTCCTAGTGTATGTTACGA  
TTGAGTTATCGTGTATGAGTCTTTAGGTTAGAAAACATTACCGGTTGTTTTACAGTCTCTACAATAGAGTACCAGAAATGAGGTTGTTTCAT  
TTGGATTTGGCTATGTGGATAAATGACCTAATCCGTGCGGTCTTTACATTTGCGCAAATGCTCGTGGATAAAGTAAAGGTTGGTCAATA  
TTAAAGCGCATGAGCGAGAAATGTCTACGGAGTTATAAATCTCCAGCAATCTCTGTGAGCATCACCATCCGTTGAATCTGGAAGCATGGCA  
ATGAACGCAGAGGAATCAGCACGCTTCAAGAACCTATGATTTGGATCAGTTAGAGGAAAACAGATCGATTGCTTCGGCAACTAGTAGGAACAT  
TGGCAGTACGAGGTACCATGGATCGAAAAGCCGTTTCTGGGATATCATGGTTCGGAAGCAAGAAATTAGCAGGTATCATAAAAGACATA  
TTCCGCAAGTGAATCTAAAAAGGTA AAAACTCTG TAGAAAAGACTTCTGACGAAAATGACAAAATCTCTATCTGATGCTGGTATTACATTA  
ATGAAGAACGATATGAACCGTGAACGAGAATTAATCTTGGTGGTCAATGTTAGCAATAGACATAACCTGCGATCAAGAAACAAGGTTCT  
TGTACTTAAAGGATGAACTATTGCTTCGATAGTAAATGAAATAACATTTATTATAAACCAATTTGTCCAAATATGATTTTAAAGCCAA  
AGCTAAAATGAACGTTTATATGTTCAATTCAGCGTAGATTTATATGTTAATTTTTGGGGTCAACATAGAAATCAAGCAATAACAAGGAA  
AGCACTATAGAAATGAAAACATATAACAAACCAATAATAGAAAATGGAATAGATAATGAAGTATTCTTGTCTTTTTACAATTTATCAA  
CAAAATGACTTTTAGATCTGATATGTTCTATATAGGTTGCTTACAATGGAATATAACAACGACAAGTTTTAAAAAAGCTACCATTGAAT  
TTTAGTAATTTTATTCTACTATAAAAATAGAAGTCTCAAGTACTTAAAGGATCAAAGTCTTTAAGCATACTTCTATATAGAAAAT  
CTGGTATAATTGAATAACGAGCAATCCATAAGCTTTTATTGATATAAATAAATTGAATTAATATGCTCTTAAATTGATCCTGAAAGTTATT  
ATTGTA AAAATCGAGTAGCATTTCCATAACAAGTCTCTTACCTATGGTTGCTTACAAAACACTGACATTC AATAGGACGCTACTGCGAA  
AATTAACATACTTTTTGTAGAATAAGTCAAGTCTTCTATGAGAGAAATTAACAAGTAATCACCATTTCTTTTTCTGGTTTGTGTTTA  
CATTGAAGTTTATATGCTACTCTGAGTCCAGATATACTAAAAAGAACTGTTATATTGCGGTCTGGAATCTATTCTACCCTTTTAAA  
GAAAGAAATCAAGACAGACTCAATGCTAAGTTCGACATTAACAGGGGAGTTTTCTCAAATTTATTTTTCTTTTAAATAAACCTTAATGAA  
TGATAATCTCCACATATAAGATACATTCACGATAACTCATTGAGAAATAGCGATACAAGTAGACAGGATGGTCAGCTGTTGATACGAATG  
GAAACGCCAATAGTACAAAAGACAAATAGAAGGTCGAGTTGAGGTGCTACCTGGATTGAGTTTCTAAATATGAATTAACACATATG  
TAGTAGAAGAACGTAGTCAAGTCAACGGACCTTTACTAGTAGCACTCAGATGGTGTAAACAATAGCTCAAAGATGATTGACGCTTTG  
GATCCGCTGTGCGAGCATATCTGAATGACTGCTCAAGCAACAGTCCATCTAAAGGAAGCTTAAATAACCACTCACCTGTATCCGGGCAGAC  
ATCTATAAGTAATAAAGAAGAAGGAATAAAAACGATATTTCTCTGCGATGAAAATGAAGCCGTAATGTTAATTTACCAAGCATTGAGCCA  
AATCAACCAGACCTGTCAATAGCATAGATCTTCAATTTTTCTCGGGTCTTGGAAACAAGTCAAATTTTTACTCATAAACTATTGAAGATA  
TGCTGAAGATGACGATAGAGATGCTCTGATGGAATTTCAAGGTTAGAAGGAAATGCCGAGATCCTTTCTTGGATTCTAAAGGAAAGAAC  
GTTGGGAAGTACTTCAAGTATATTCTGTTCTGTTCCATAAAAACAAAACAAGTCTTTGCCATTTATCTAGCTCAAGAACTTACTGCAA  
ACCAGCATGCGAATACTTATAACATTATTAATGCGACCCCTGATCAATGCCGCTCTTCTGAAATTCCTGTATGCTTCTCTCCGATTT  
ATCCTCGTACTGTTGCTGATGATTTCTATAATAATGTACATATTTCTGATGACAACTCATATACTGATGAAATGCAACTGATTACCCTCTTAA  
TAATCATGCTGCAACAAGTCCCATCTGTATTTGACTCGTAACCAAAGTAAAGGTTGATGAAAACCCAGTAAATTTGCAATATGGGC  
TATGAGATTCAGCCGTGATGGTGCCTATTAGCTGTTGGTGGACAAGATAATGCTCTCGAGTTGGCAGGTCCTTGACAGAGATCAGGCTCGTAAA

aatacgtctctaccagagacaagagattctactcataaacttgatttatgctgctcccgttttcttctaccctgttcaagaatatgccgggcacac  
tgcagatatttttagatatacttggagcaaaaacaatttctactaagctcgccatggaccgaacagtgctgtttatggcaccctcttcgtaaagat  
tgcttatgctgttttgaacattctgactttgtcacctcaatagctttccacctaaagatgatcgatttttcttccggatctttagactgcaaactaa  
ggttatggcacaataaaagacaagaatgtagcttattggaatgagcttccggaattgatcactgacagttgctttagcccagatggtagtttggcgt  
tgctggcacatttgttggcctgtgcttattttatgacactcaggacttgcatttctgacccaaatacatattcgaagtccagaggtaaaaattcaa  
aaggaagcaaaattacaggtattgaaactgtactcgaataatcgaaaatacgtggcgatacggaaatgcttggactacaaatgactctcga  
attcgaatatataaccttctgataagagtttagaaatcaaattaaaggtcacttaaatgaacaaagccaaaataaatcatcctttgatgatgaa  
ctgaaacataataattgctggcagtgaggatcatcaagtttatctgggatattccaccaccgatttgcagaaaagcaagaaaaatgctatga  
acattttaaagcttccatgagaccaactactaccgctattttgtccaaagccgcacaaagcaaaatactgttaattggctggcgtaccctttacact  
acagcaatcacagctcgacggctcagtgaggctcgaacacgtcgttcgatccttcacgattgatgaatcatttgcatagtacacgtattagtcaa  
ctgccacctgaagtgagtagtggtcatatcattgtatgtggtgacatggatggctgcattcgagttttctgacaggattcttctttgaagctagaaa  
ttcacaanaaagaacaagcaatgagaattttagcttaccctcactcgtaaaaataactactaataagtagtccctccgaagtctcaggaataagtc  
attctctttaaaccggtcaaggcatccttcagctcattgaaacaaaatcccgtaaaaagagaacaacgtgaaaaggtggatgttccgaaagaa  
ataactgcagatcccaaggaaaccatttggatattggaatgaaaatgaaactttaaactggttgatgatgatgcttcaagaaggggcttctca  
atggcttactattcaatgaatgacttggatgtcaacaatacgaacgtttctagagccttaaatattgcaatgaaaaaggggactaatactgaagat  
atcgaccatgctggatcctgtaacggttcttcatctttagcacctcgtccaaaggtgagagcactcgattcatcctgaaaacgatcgttggaaat  
gctctaaatgcggaaattttttattttatgctttaggaaattacagattttaaacacattcacatattcgttatatgctctcactgtggtcggaaat  
tgctcacctaatgaggacgataatagtggggacaattgaaaaggtttctgagaaaatcggtgtataattgaagtattgggtgcttctgttagtgt  
ctaatttttatagcagaaagttgtcagcgttaacacgggtacatgggaaatcggatacgcacaatgattgtcattagggttttttctactttctgcc  
taaaaattatgatcaaggggctagcctacttactcgcgattattaagtacaaaggggttataattcatgtttaaaggggttacaataaaaaact  
ggcttaaaacaaaaataaagggttaattgatgcaaatgatcaaaacgacatgttgggtatcgggataaacaagatgactgcaagattat  
ttataattgtgtcaaatgataatcatttaataattcagcactcaataaattcccttgcatagtttactgcttattacgtttactgtaagaaacc  
atggatattataaaattctaggggtctttagttgtagaactctgtcgaaccaaaggatgagatttgcctatggacgcagcttataaggtcattat  
tggtaatttttcgacattttgacttattgactattcgttattggatgcttgggctgataaagatttatatgtccaatttgggttttatgatacaag  
aattttgagtaacaagacacaactcgcattggctttagttacatctgtttctgttctgcttgcattatatactgaatacatccttcatgtacatattata  
cagcattcagcacaactaattgtaaagtattcttaggtatacttgaattgttcatagtaaagcaggacgttgtgaattgttcaagcagtagtagat  
gcatcatttgaacattctgtaagaagttcatgtaataattgcaaaatttgcctattccatgataaaaccagatttttaataagctgcctt  
gtttacatccttaatatgatcgttataatgaaagctctcatccctcaggatcaatatcctttattatctatatttctgtaatttccatg  
gttggaggacttctggtatattcaaaagaatattaattgaaaaagaaaaattttctgttagaaagctgattaaggcctaaaagtttgaacgctc  
actgttaaatttttactgtgaatcaagaaagaacagtagcctcgttgggaaactcctgaagcattagaatgcggactttatcgaagtattttt  
agtttttcaaaacagtgacttacagtttgcagatgtcagcttgcggcgtagaaaggtatttcaacaaagtcttataggataatgcggtggg  
tattaaccaaataattagattaaatgcgacagaaaatcacctgtcaaaactgcattcacttaggtgagcagtgatccataaagatttgataat  
aggaaaaaacggcaccctcatagctatgttcaggccctgaaagttagctagctacatttagagctatttctttagaagcttaagatttccctacg  
aatgaaagacttaagatgttggatcagtcacgtttcggatcatctcagttcaatgggtgcggtagtaattgcttcaatatgcaaaaggatgatt  
ctatagattttccattttaggacattcaggcccaataactataaccttttaggaccaacgaatgtgtatggctccttaccgccatctctg  
ttgatacacctttccaggcaacaacatcctatgtttcaccgctatcacctattgcttaaagctatttctcaaatggcagatatacacagttcatgt  
atattaatagagaagcttttcttagattattatcatcattatcatgatggttagactgttcagaacatttattatgcaatgtgtgattgggaa  
gtcgaatggcggccgaaccagaagctgtaactcgtctgataaatactacaagttatcctgggatgctttaggaaatattggttaggaaggctc  
atattactcagccaatgtctgctatgtctaggattctatgatattggatgggaaacaatttctgggtggttgtgtcaggcttagctttcgaat  
gggacaggatttaggattcaattagaccaaggaaatggttatgaatgaaattcctgttatctgctgaggacgcagctgtaagaagcagaa  
tctattggggcagctatgtcagatgtttttattagttttatctgggaaagcaactacattgaagaagtcagatacagatttctgggtctgtt  
aatttaccgactttgatggtattgatgagtttaagtgtgacttgggaccagctgcaaacaccagcaactctttctgtatgcttctttgttgggtgatt  
taagccatcctgctgatgctatcttattgatgttttctcagcaatttaccctatggcgtcaatgacagacttcaaaatttaggaaagataatt  
tggaaacttatgaaatggtatctaaaactccagatgatgtcgtgaaagagatgatctgaaagtcagggcaaaatccggatgcttgc  
atatgtcttactattatcttattcggatttgcctaaactgtcatttttagcaaggaaagaagttaccttaacgatgacttgcgaaagtattgt  
atggattctattgaagatattagtcagctcctaaagcttaccgagatgcttccgggtttagctggcttctttgttattggtgatgctcgtatgta  
agctgtagcgtacttattattgagacatacttctgtaatatctgaacgttagacattgaagaaaaattgaaattttctgtgatggttttaacaa  
atcatcaagcttggaaattagctgcaaaatcccttaccattgattgaaaccagtttaaaggacgaggaatctctacgcctaatcagattttgc

acttaccaattgaaactcaagaattgttccggaagaattcccatattcaactaccttgatgagacaattaagaatgagttttgatagccagtta  
agttcggctaacaatttgaagaataccgatctttttggaggacctccagttttatgacatctgcatctcataatgatctatggaaggatacaaa  
cgttcccttctaaattgaataactacataatgatggcgtccaccaggaagccactgtgcctacttttataacttcaaagtcacgatctttaa  
attaacttggcaaggggttaatttaattacatttgcagattaataaaacttttggataaagtttggtttctagcatacagcaataacttatttgg  
tctggaagtgttcatcttggttgaccgagcttccctcgtccctttaaagtagcttttatttcttttctagttttaaataactcaactttgtgat  
gcaagcaatatggattgcatcgaatcaataaaaaaagctgattataaaaattgaaatgatacttgcacatcaataaccagatacggttccata  
ggaatacataaagaatttagattatcttgggtgatgaaggcaaaattgtacagtaattaagagccatgaactgtacaagtttggattggctgt  
ataaacacgttcaactatataatataatataatcactgcaagcaatcaattctgtttctgtgcaaaaagttattcattataaataaaaa  
ctttaattttatgaaacaaaagaactccaataaatcaaacggataagtaaaccttagaattacagtttataagcatgttctccaagcgcg  
aatacgtttccatattataaaaggcgaacggaataggcaccatggctaccgaaataaatccaatacactagtagcccaatgatctccaaat  
tcagatacattggacgagcagcaggttacacctcactagcacaatagcgaaccacgggtgctgcggaagcgcactaggagcaatatgtg  
atcagagtcaataatataatttaggaaacaaaaagacaataagtaagcaaacccgaagaagcactagctatcataggtacaatccaatg  
gatatggccagcatagcaagtccatgccaacaaaacatggacataggaaggcaaatgaccaatgaaaaggggataaaccgatcttcagg  
gcacataacagatcctcttctgtttaggcccagagatactgttataagttaatggcgtcaaaaagaccagcaataacgatccaacaccgactc  
caataatgacaaacctaactcaccgtaattaaaccgtatttgcacataataattgggtatccctcaaaattatataagtttaattatgtaaacgac  
agtggagtaagtgaaagcaaacgacaatgggttcagtcaaaaagagagggctgactgagtagctgctgaaagattgctttttaggtca  
cgctcacgctcatggattgataataagcgaatcaccagtaatttgcgaatataattcgccttataatcaaggatcgttccacatgagttcagg  
aaacaaaagaaaatgagtagcaaggtacctgctcccaatcatattgatccaaaagagccagcgaaccaggtagctctgaacaatgaa  
gtcaccatgataggaccgataatgggacctagatagaaaagtgcaaaaaccaggaaggacataggtacgctggataggagtaaacatc  
actgattgtgccaccggcattggcaaggggacttccaaaacaccttgaaaaatctaagaattataatagtcacatattttgagcacagc  
ctccgcaacttgaagattgtaacaagagcaaaagtaaggaagtaaacatgaatctaccataaataactacttaaggagcaaaagggagag  
agcaaaaacaaatccaacaaaatgtgcaagaccaagtagacacaggtatagaagcatggagctcgttagcagctgttcaacaccac  
tcgaatagatactagagcaaacgtcacgacaattgttataattgaagttgaataataatccaccattttgagccattgaccaattgacggatt  
caatggatcctcggaaacctccaagtaccaggttaaggatccttcaagcttttccactgttttgggtattcattccccctcctcaaatcatc  
ctgtctaagtggaatgatgctcctaataaaccaggtcttactagagtgaaattgtagccttattagcagcatcagaccgtagaaaggtc  
tttctgtgggaatgcttcttcaagaaatgggcatcttctagcttttgaatgccatcaaaactattaccagttgtaataaaatcaatccata  
cgtactcaccacttgttcttcttctatattcaccgacttcaattcactgtctcaggcgacagaaatttgcgaacaaacaatatgtagtgagat  
ggttgcgaaagtgaagtgcacataaaaagggtcattatcgtagctttatataatatttacttgttacaataacttatgattgtattta  
tattgctgttatattagtaacaaatcaatgaaagatgttaataagattcaagaaaggaacaaggtccaatgaaattcaaggagcttg  
tttcaagtaactgatgtagtaaaacaaaacagaacaagatacttactatttgaatgagctcaattgaaatgtagctatgtctatgttct  
agaaaagcaagaatgaaactgaaatcataatgaaacttttaagccaaaatgcaatctataatattcaaatattcgctacatattttaaagtctt  
ctcagtttctagtaaacattttatgtaagatgtaagcaaccatgccaggaaacgaatccgtaataactggctatgcttttattcttttttt  
ttttactttcttcttttttacggatacagtgtttgcactcagtgtaggttgtttaccatcacgaagttctatctctacacctaanaagaga  
ttgtttgatgaaatgcaaattttgcactgattgaatctataatctattgtcaataagacattaccatataaaaagtagcctcgtcctcaagt  
tataaacgcataatttttctcgtcctcggcacacataagcttattctaccgaaaactcaaaaatcaaatagcttggtttagctttcacia  
cagatgatgctttcagactcgtataaataattttgtcattaccatcttctactgttcttttcttttttataaccaacgacctttaccgtt  
aaattctctcagcagaacgaagacaagaaggactaactgttcattgaaatgacttggtaggtgtcattatccctgagattatattcttag  
gtaaacatgaatagctctattcgttttgggtgctggaagcattggaagtttcttctgtgactggcaagcttctcgttgcaaaaataag  
ttgtttgttgaagaatcaagcaagagctgaacagttcagagcgcagcaatcgttcttacaatcgaacggagctttgaggaaaatgacca  
caaatagtgtaaaactaaaagcgacatatcctgccgagttgaatgttgatacagttgacaacttaattgcacaactaaaactgtacattcaga  
aagggaatattagattatgttccctataaaaaaagactcaaatattctgtttgtgcaaaaatggctaggtgtgattgaacatctgaaaagagt  
ggtatggacagatgaaagcaagagctcctaatttaccaggaattactacacatggatgtttcagaagaagactttcattatgtgatgctgg  
tttaggaaatttaaaatgccaagttgggtcctcgaatggacagtagctgtgacattagtagaattactgatgaagttcaaacggtgaaatc  
aagctactgtctatgatgattgtctctcaatgtgagaaactcgtaataatgatgatgaaccgaaactgccaatcctcgtttagatga  
atcgagaattatccaacattgaaagtgaaagtcttttaagtgattattaccgaaatgtgttgatgtctttttaaagtagtccaaattggctg  
aaaacccaaaagctagacagactggatattcatagactttagactttgtgatgtatgtgggttctgtgttttggaaacaatgattctccat  
gagacaagacacttttcaagagagatacggaaatagattctattaacggttgattgtcaaacgcaaacgaaactaggataaccagcgaat  
gtcaataagaccattaccctcttggcaaaattagagcacaggtcaacaaagacgatctagaattttttctatgattaataaacggctcttt

gtccttcaataatataatgctgtgatgattttcatgtatttttacatttatacgttttcactttgtcctttttatttgtaaagttgcatacattgagaca  
ttatccctagagttagaagaatcttggtctgtgctttacaaagcataaacgtggtcctagtataataccaatgataagttgtctatttatga  
gtcccttagtgaaagaatgtcgtaaccaatataatccacattttcgccgtaacgataatcctgctcgctttccctcagctgtgtttctgcaatg  
agctgctgccaattcaagcagttcggaagattcataaaaaacaggaataataatacaaaaggtaggatattgtctccggttccatattta  
tagctactgagtttgctgccatcagcagtttttccagagagctcaaaagcaatgaattctataaaaggaatgaacaaagccatttcaagc  
ttcaggtctcacactgtaaataatttggccagaggcaatctcaaaaagccagtaaggctgaaccatacgaatcaaccgtacaaggagcttagct  
cctcaaccaatcttagctgaacagcaataactggaataatcgtaaggagaaccagcactcaacctttgattgatgaaaggagcggtta  
aaagttccatgcttagcgtcgaattttaaaaaattggttaaatgattcattacatgaaattgtctataatgtcgcaaaactaacatccctcatc  
ttttttttccccgggtcaacaaagcgaattgaaactgtcacttaaattttctgaccaccacgagcttcaaaaaccacatggcatggaacaaac  
ttgagattgacaaagttcatttagctctaattgttacaggaggtattactatattctgctatacatctagaattattcgcgagcggttagctgtag  
gcaagcaagtagcgaagaatggtttttcggacaataatcggaatagcttttcttttttttttttttttaataatcttaataatgtaataataaa  
aaaaatttagctgaaagaagtcacaaaggaatagccttggttagtgtgctggtctcatattggaccacatgctgccaatctaattaacccaa  
aatcatgggggaacgtggaatgtaacgattgaaattatgtagaagtggaatgaattgctcagttttgtcttggttggaattaccagctgctga  
ctttcaacaacattttagcagcattttatgatgctgagtagattgattttggatgggtgattttagctggtatttccacgtattttcccaac  
atcacattcttaggatctcgttagttgacaggatgataactcaacagatcctgttctatctcgtgtagtaggagaaggtgccattgcaaaaa  
gaaatcctcagagaattcgtgacttagtctgaatccggatgtaatgtagggatggctgctttttgtactttgcaaaactcttgacag  
tgaaccatccaatcatgcggtcgagactgggtgctttgattgtccttaccgaatgtgctttgggattttttgggtggttattggggatttttta  
gcaaaattactgaaatggtttgaaaagctaaaatttattgatgcgaatagtattactcgttatcatttgcattcctttgatggttcaggaatcgg  
aacaatcattggaattgacgattttatttattcttttcttaacgggtgtaatgctcgcagggataatggtttgcaaatatgctcagtagctatgt  
accatgctcatcgacaaacttttaatttgcgttcttacttatttccggaagcatcatccctgggagaatctaactggcctcagatggagctcc  
agtttggtgcttattgattcacaatttaactcttcttctgctgcatccagctgctttttatgcaaacagttatccaagatattcaaaactgg  
aaagaagccctgttgcgtggccattttggacctataggtgatgagcctgtatgctgctttcgtggcagatcaatgcttactccagatgaaatag  
aaagttggtctataaatctacagacgagttttcattctcagtagttactatggccaatcgtttggtttgtttttatcttcaatcatgcttcatggg  
ttcaggttccggttcttatttaccggtgaaaaactgaaaagctgttttcgcgacaaaagttctatgaccgcccaacagaggtggagcaaaaagtca  
ataaaacctcagaaacaaagagagtaattcatgatgattttgtcacaattgtacatgcaccgttatggaagcataactttaaagcttaaac  
tgtataatacaaaaaacaaaaagtaagcaagaaggataaaagaaatattacatggtcattggttattggttaaatgactaggataatcaatga  
aattcctaaaggttacggcagtcgggataattgaaaagtgaacgaataaaaagtagtaaaacacagcaatgctttcagctttatatttcat  
tgtaaaatgtaatgctcgttaaatctcgtttgttttattgttggttcaagtgatccttgtagtgtttcaatgtttaccccgtagcaaaagcga  
aatgatcatgatgatgtgagcctagacgaatggcacttaagttcgttattgtcattttgtcatagtaaatcgggagaacaacatacaacatag  
attcctaaatgatatcgccatgattgttacaacatgaaggcaaatgccacatcgttttgcaaaagagcaagaaaaacatgctagttaa  
agaaagatatatactgttttctactagtggaagaggaatttgaataaggtttagtgattctttgatgatgatgtgggtgggacatcggttacc  
ggaaaaattcagcagaagaacggatgtatctgactaaagcagctatcaagcttgaaaaacaaaacagaatccagcataaacaacaat  
aagacgtacggaaattacgcttagtattggcttagcaaaagatgtaacaaaagcaaaactgaaataattgccaagttattattagccgct  
ggaggtaggagaatcctaaagggcgagtcattctcattgataaagttcagcctttaccactgagttttgatttgacaaattatcggtatcag  
ctcccctggttccgcttaagttgagtactacgtaaatggagaaactatataagtagcctggattccatccataatttcaaaccaaaaaact  
gtttttctgtagagctgctcaaaaaagtaattcctttcttatttcttcttagaagcattatattcaatcggtgttctttcttcttcttcttct  
attatttattccccttttttaaaaagaaatagaaaaatcagaaaagaaagaaaagccaagatcttttgatataacttgtgtcgttaaaaa  
aaagctggttttattcaacgctggtttgatctttttagtctttgttttggttggttttttacatttgcctataataacctcgattgctttacgtt  
gtttctattgattgttcttctttaaagccatccatcccttttccaccgataactctcttaccagttcttttaaaaaaataagcttttcatctc  
ctctcgttaatttatcatgtttgggtctttcgaagagatcaaccagttggtaataggggctacggcactgcccgttggtgcttacacggtgcc  
gtattttcaaatcgcgagtaataatgctgaatacaataaagcatttacaagcctttccagaggcaattagatctctccatctcgtgaagcac  
ttttgatgaaataaacgactcaaaagtagatgttttagttattggaggtggtgccacgggaacaggtgtgtgtgtgactgtctacacgtgg  
tcttaacgttctgacttgaacaaacagacttctgctgaaacttcatgaaatctactaaaatggcagcaggtggtgttgcctacttagaaaa  
gctatctttaaactctgaaagctcaattggatttagtcatcgaagccctaacgaacggcgcaatgcttcgtagctcctcactttgttctgtt  
ttaccgattatgacccctgtatgaatggtggagaatcccttattactatgctggatgtaaattgatgactggttctggttcccaaaaattgga  
gcttctacggtttttccagagaaatgacaactgccctgtctctatgctaaatgattctgaactgaaggctccttgcgtttaccacgatggtacttcc  
aacgattcaagaatgaacacgactctgcatctgactgagtagatggtgctacagcttgaattacatgcaagtaagcaattgatcaagct  
tctgataataaagcttgggtccggttgcgttgatcgagaaactggaatagaatacagggtaaaaagctacagccactgtgaacgcaacaggac

catacgagataagatcttagaaatggatgaagatccaaatggaaagccccctaaaactgctcaattccctcgcagtggtggttccatcttctggg  
ttcatgttcttaccgcagtagtactgtccttagagattggggttctcgcagccgcaacgaaggacggccgtgtatgttttcttcttggcaag  
gtaaggtttggctggcaccactgacaaccacttaagaagccgttccaatccaagtcctcagaagaggatattcaagatatctgaatgaat  
tgcaaaactacattactttccagtagcaaaagaagcgacgtgctatccgcttggagtggtattcgacccttggctcgtgacccaagcaatgttccaa  
aggcttgaccaagcacttcaagtacacaggggttggctcctcacttaattacgttacgggcactggacttgttactattagcggaggtaa  
tggactacgtatcgagaaatggcgaagagacgggtggacagattggtcaaggacttgcatttggtaagaccgttaaaccatgccagacgaagc  
aactaatttgggtggtggtgaagactacaccaagaactattctgcaaattgatgcacacctaccatattccacttaacctagctaaacatcttc  
acataactatggtactcgtctccttggatttggaaattgacatccaatccgacatcaacaattgccgctgttcttctgctgtaacagaagtcc  
tcttccaaatcagacgttacaagaataatgagttatcgtatcgtcttccgacgagccttactgtcgtgaattgaagtatagtttcttaccg  
agtttaccgagaacccactcgtatttctggctaggagatcaaggcttgcgttttgaacgctagagaagctttagagactgttgacgggtgctactac  
aattatgaaagaagaatttgggtgggataatccacagctcagagggtgagagaggaagccagagaatatacattaagatgggttacctccc  
aactctgatgaatctcggcagacaacactcttggaggtgtatacttggtaaaccttttaagttttattcggatgatgaccagaaactgtgtc  
caaggtattatataatcttctactcttagtcttttctatttttactctgcttttttacttttacttttacttttacttttacttttactttt  
aatttagtaatggagttatatttgaagtttatttatattatccaggtatgaagatttttaaatagcagtaagtaaggagggaagggaacattaaa  
agaagggttaggaaggaggtgaggtatctttaaataatctctgtgtccattgatgccttctttaaataaggggaataattacttcataaacgagga  
agaaagatgtcaatgttaggtcatgctgtattgtcaactttacgtaaccttcttcaagaatgaaattatcggagaacaaaatgaacgtttt  
aacaattgcaaacatgttatctttagtatactgatattagcaattgctccagtaaatgggccttggataatggcctagggaacacacctctat  
gggatggaactcatggaatcgttatacctgtgatattaacgaaactgttatcctaaacaatgcccgggctatgaaggagcttgggttgaatt  
gggttataactatgttatcatggatgattgctggtcgaacgacagcgagatccaaagacaggaagaatcgtccctgatcccagaaaattccta  
acgggattgagaatgatgaaaaaattcacaacatgggggtcaactcggatgtacttagtctggttaagtaacacatgtgctggatccctg  
gatcgttgggcatgaagagattgatccaagatgttgcgaatggaaaatcgattactgaaatacgaataatgttcaatcaaggacgtagtg  
gctctccttgataagttatcagcgttacgaagcaatgtctgatgctcttaaaaaacgggtcaccctctctatgctcttctgcaatggggaga  
agatcaagatggaatgggcccagtagaattgcaaatcttggagagtgacaggagacatttatgataattcaatagatacagacattcgtgccc  
atgcgaaacatagactgcccgactacagggataccactgctctattatgaacattgtcaacaagcaacgcctctggtagaaaaagctggac  
ccaacagcggatggggtgatggatggtggaagttggaatgggggcatgctttgatgaatacataactcacttccatgtggccatttt  
aaaatctccgatattcttggtaatgatgtagcagtagtgcgtgagcatttggcaatgtgagcaatccagatgtgatcgtgtcaaccagga  
cgttgggtctgctcctgccaacagaatgtggaaaaagcacttctcgcagcgttttctgcatcttctctggatccctctcgaatggggactgggtg  
tggctgttcaatgaagctactgaaccactgtagaaatgaacattgcctttctgacatttttactgataacctgacaacgaaaagtatacatg  
ggttgctaaagacatggagcaagagacgacaactcggctcgtatattgacagctaacgttgactcctcatggcactcaagatggcgtctcc  
agaaatctatgcatctcacatacaaaaaactattgggtaagcctcgataacgcagaatagagtatttagcagttataattacttatgatgt  
ttgattgtaaaaattgaaacataattgaaattatctcatttagtagtcttgaaagtggtaatagtcatacaaaagcacaattaaccactgtaa  
atctacgttttgaacatggtttcggctgattattgcttaagaagttcctctcgttcccgaaggcagtagaaacagcaggacgtcaataaga  
cgcttgccactcatgctcttgggaaactcctttcgaatccagctgaggaagcttctttaaattcgttcttctgggcaaaaattgctggt  
agtaaactgctccaggttacaagacaatcagcaatcgtacacttattagcaacaagatagctctgtctaaaagaattgtttctaaaacaccg  
agaacacgcttgggttcttctgtatctagtaatcgccgacgtaacaggctcgtgatgataaaagttaaaccagatgcttgcctccaaatgaca  
ccttgacctgaagactggaaaaacagatacgaagcaaatgatggtattctggatgatcatgaggcaaggaaatcttcttcttctgctatctgt  
ctgtcaagtaggcaaaaatgcatcggactcccaatcgcaatgctgatttttctgactgactaatgtaggaactctcattaggtatgtaagc  
aagggttcttctgacttttctccttttccaaaatcgtaatacactggtcataagagagatttaacttttcaaagtaagagctactttccaagg  
gttggactgccttctgagaaaaagagtaaatgtgcaatttctgagaatattgctagaatacattctatagtagatttagatcagaattc  
gagtttggttatataatgacatgatgtaacgctcgtcaagactgcttagagcgaatgtacattttagatagtaaggatcctgagtttaattc  
ctcagcattctaatagcttttctttatattgtcatctgtacaatcatcttagcagaatcgggtgctatagagagcttttattcaaaagctgaatttc  
gcttctgtctgtgtgtagaggtcgttacatcgctaagtttaaggtataaataagctaaaaagcataagcctaaaggactctcatactatata  
aagttacaagcatcggaagtgaatacataactggagaagagaaaagcaaaagattggttatgaagtaaagatacttttattacaagaat  
ttaaacaactagaatggctcttttaagcgattataaatacccaagttcaagtagaaatctttataccgaaagattgttcggtacggctaatt  
aagattgcttttctgctatccatttctgtgaccaaattcctggtcattgctacaacagcgtccaattgatgcatacaatcctacaattgagttatt  
atctactctcaattttcactttaaaacattattgtacgggtgaacactcggctgtgacattattaccacataaaaaagatattgagtagaa  
tccgtcgtacagaggaacatttatacaaaaacagaaaaataagaaaaagaataacggagttgaaataatttaccagctcctttacgaaag  
atatagaacacaagacaggaactgaagattaataagatctgattactgggaattgggggggggggggtatattatcagcgaactgaatg

gatattattaaagttatccttttgctaaggggggtggggtgggtccttgggggttagtggggctgtaaatgacggtaggaaacaccaagatccgtgt  
tggcaatacatgaggattcaaaaacagacaagaagaaaaatcttttttggtagtcaaataatgggactcgtttcatttaacgttttgcaaagcc  
gaaaaaggcgtaataatgatttccatttctgcccgcctgcaataataatgatcagagcatgaatcgccaaattgaagaattaagcatgatc  
gttggacctgtgaactgacaaaaatataaaaaagcagatgtaagttatgaaaatcttgaaggaccttcatgaaatgtgctttctcatag  
atttataacacggattgagccgattagaaataaagtaagagtcaacgaagccttttgcaaagaaaatctaaaactactaccattcaaaggc  
gctctgaatactacgttaaatataaataaataatattcctagaaagaaaaacaaaaaggacactcagataaatcagccaagttcatcatat  
ttctttgttcttcttaactagaactgaattttacccttctttgtttacctactatatttcccccttttgctaaactacgttaaagtataatgacgagca  
cgtaagctgtgttaacctttttacaacgctctacagtgaattgtgaaaataaccagggttacagctcattatctatgacacctttgccacaac  
cagcctcggtattcatcttctatcgggcaaaaattccgtgtccagtccttatacttctatccatctacagtacatgtttgacatctgaacgagc  
accttccctctccataactctttgtctttgtttactttttcttaatattttgttactttttgggacggaattgtcattaacagagtcgtaaagaaag  
ctctagttcatcttggaaagaacgacatttttaatttctcaatcgtctacggggagtggttctgctcgatattataactctatctatcttttag  
gggtggttatttccaactccatattcaattatgtctgagattgatcgaagactagtgaagaaagaagggtttgactctgaggatcgaat  
accactaccttcagactacagaggctaaaataaccctcggaagccgcaacacattctatgataagctcctgaagcggaggagggttttt  
gaaaagatagttaatgacttcaaacctctgctactggtcgccctgatgggggtgggcttgaaacgcaagctaaagaatcggcacatgcaaatgat  
ttctattggagggtccattggttagtggcttctatgtcagctcaggaaattcacttggcagtgccggtgctgctccgtcatataaattatcgtaa  
cgggtattatgatgtttttaccattttagctttgggtgaaatggccgtggcatatcccgtagctgggtttcaacacatatgacatcgggtttatcgat  
cctgctgggggttttcccttagttggaactacttctaactactttgtgacatttcttttagacttacgacatgcgccattacatttagatttggac  
ggacataaacagcgcgcttggatttctatcttttagtaacagtcattataatatttcttgggttctgctgctatggtgaagtgaattgtctta  
agttttataaaggttatcgctacacttggctttgtattttggctattatcattgattgctggagggtaccgactgatcatcgtggttatattggtgga  
gtattatcaagcataatagcttccgaatggattcaagggtttttgttgcagttttctcctttctggttacggaagttattggtttg  
gctgcagctgaaactgataatccaagaaaaccttaccaaaagtgtccgacagatctttggagaattgattgttttctggttttctttta  
gattggcctttgattgatcccaggatcctaacttattggggaatcaatccggtaccgacttctccatttctggttatacaggaagcaaa  
attaaaggccttccctctgttttaacgccgtaattgttatttccgttatttctgtaacaaatactagcacatatacggctggacgtaccctccatggt  
atggccactctaaagcatgccccaaaactttttgtttacaccgatcgtctaggccctcctaattgctatggtgtagcttagctttcgggtttttg  
cctttataaacgaagcaacaagaatggaatgatattagtgataaccgtttaaactggctacttgccttactggtttatctaacttttctggtggg  
gtagcatttgcctttcacatattttttcgattgcctttaaagaacaaggctcgtcattgaatgaattagcatttgttccccaatgggcatttggg  
gttcttgcattggactattttcaacattttgtgcttattggccaattttatgtatcactgttctcctcggggtaagcctaagccaatgattttcc  
aaggatacttggctgctgttggctatagttttctggttgataaaaatattatgatcgccgttatttcaaatctttctcaattagatctggatac  
tggttttactctgctgagttttacaacagtttctgatggatcagaaaatgagccaaagaaagaaaagggttcttaaaaaaacgttggagttctt  
ttgctaattatgaacgttaagcaaaaagcctttgtaaggagaaagtgtgagatcggggttctctttttatgtaatgattgtcaaatccgctta  
attaggtgtcgttattgactgaacgaaagagtcataatgggcacgttaaagagtttaactattagctttttgttctgtaaaaagggttacgaatt  
aatataagagaaaataaaaagggtgaaagttgaaaatgaatacaatgggctggctttttttgttcttataatttctaaatttttaggtg  
tttagaacagtaaaaaaaataagaattttagcataatgaaatccttttctgactaacacgaatagcgtagctgtagttactaaattcagtc  
gtgtgaataattacatgatcctaattgggcattccagggttacagtaacaaactaaacgagttcatcttgggtttttatttcatggtatattt  
gatcactcggacttcccaagttctaattgtgtaagtctcacttttcaatgaattgcataaaagtggttgaagaacaagaagtgactgc  
gactattgtagtagctgtaacaacggctaaaagttcaaaagtaaaaaattcaaaaaattgaatcagtaactttacagtaattcatcgtcattac  
cgtcgttattatagcggactgctcttctgagagacacaattgaatgaataaaatcgtataaatgtgttttaagataatgaacgtcaatagtaga  
aatacgttttcatgaactgttgaaaaagaatggcttactatacaaaccttttaggacaatccagaaaaaagaagataccacatttgggt  
ttaataaaagtagagcaaaagcgaagttgatatttactcaggaatacatgaccatattgcttaaggatacagacagacttcaatcagagcc  
aaaagctagacagttatgaattataaaaaataggagaaaaacgaagtagaagcattcctgtaagtacacctccaaggattcaga  
atgtcctcatatagaatcattcatcatagtcagaatgttttattataatttccgaacgtgttgaaagatcagtcctaagcgtgaaatagtaa  
aagtaagagagccaatgctcattgttataccacacagcaaatctataaaatgggtgggtcaattttagatccagaaattcaacattgccataaa  
aaaccagtgttcacacattttatggatcaaaactagcttcttattgtaaaagtgtccttctcctaattgatgtaaaaacgcaagtaagtagag  
atgattatgacagatgcttctgatatggaatgattcttctgataaccgttgggttaacctaaggaaatgaacgggagacattccaattgtcagtagg  
aaagcatttaattgaaggtaacgctttttatgtcattctgtgaagtttcaaaaatctcaaaaatctgcgagatcttgggttttagcaaaagaa  
taatacagtggaagaagtttagtataattttgattcatttaatttttagaggacagtaagattacgacttaacaaccaatacctaatttctta  
tgttaacagaaaaaaaatcgatgatgattcataacaaaagctttactaaacatcaattcgcgatcaaaagtacaaatactatataaatagag  
atttattatcatatgggattgtccagcagtcctttcaattaatttagatttgattaccagcgggaagcgttaactgagaaggatgaaatacaggag

gtgccattcaagtaaattagactcaatccttctcgtttctttgattttatccttctgtactgttctcgtacaccttcagttatacagactataaattgg  
cctttatagatatttagcatatcaaggcctgaagtgtatgcaaacatcattttagtcatagcagcttgtttgcaagttcgtcaatgggtggttca  
gtccgatactgcaacaagagttataattgttctgccaataagctcgataactaataagacccaaatcggaagaggctttcaggagagcc  
atgtttgttctttttggacaattcatatgaaaattggattaatagttaccataaccatgtcgttgatattggggcaaaagttaaaatacaagcga  
gattgtaatttcagctgactcttctcctcgaaaagtagccaaccaaattggcaacatattcatcttggcattgcataaaataaaaatgg  
gtcaacatcataatagagcattttatgatctaaaaacaatttcgacagaagacagacatttctgaccaagttttgtttacgacctcaatttcg  
aaaaagatatataatcatctctgtatatttcattaccagggggatgctgtaggctgcattttgacgatggcgttcaaatgacgttgagatccat  
aatagcaaaaacaaaagagcatatgtaaacacatcaacgtcagaaaactcctttggataaggagagaaaataccaaggttcgatttcatggtc  
gccaagttgaatcttgtttatattcgaatacgggcaatctcgtgagggtttgaacatggaccactaaagcgaagcttttctacttctcttctt  
cgataccggtaccttatgcttctccttcatccaacaaaggaggctttcattccagcattgagccgtgatcactctcggcagaaggggtagag  
ggtccaccttccaaaggtgtacctgggtcagtttagccggcttggttacagatcttctctgtcattttgggaaattagagtctgcagacttc  
ctttccttgagctttttcggcttctcaggtggcggatactcgttctttaaaggtcaatatttcaattgtaatccattcatccagtcgtttattat  
aatcatcgtaatgaacataatagaaagtccacttgccttttgaatcattaaatttctgccttcgatattccccatctttgaaagcataaacct  
tcgatttatagactatattctgttggtcatgcttttctccttaccattaccattattctccttttaccattttgctgcctcaaatagcataccaaa  
cctcaatagaatacaaatccattcaagtcagcaccattaaattacaaggtgggagtttttacgtagttcattaaagcaataatgacgtt  
aattttataccctaaactcctttatctttattgtgagttcaacgaaggaaagcaacatattacaggtgaattgtttatgccgaatctcatgca  
gttcagctgaatctacggctagtttgaagccttagaagaataataactatagaatcgttcatagtgatctaaaaagagagcattgac  
tttaggagatcaataaacgcaaacccaagtgacgagctacttaaaaggattaccatacaaaaataaaaagtataaattataaacgacgat  
aaagccacgattcaacagataatcattcatatcccttaaacacttagacaagagaagaactcacattacaacgtatttacatcgaattattc  
cagtaattatacattccatgattatgtccgctcaaatcagaatgaaaacaaagtcattagccggaggacctgctgactatcgttgatgaag  
gaacttctccgaagaacgagttgtctcgagctccttggaggactgacttgggttcagcagctggcctactacggggcggtgttttgcgctc  
aactgcgggttgaattcgtcatcatcatcatcatcgtcatcatcatcgttccaggacagcctcagcaggttggcggatatttctgtctaacgg  
cgggttgatggtatccggatataaggtatttaaggctcccaccacttcattcaacttgattactagcgcagaagagtagtctgaacgcga  
tccaaacactttgttttagcatcctttccagtgattttaaattttgccttttctgctgagggacgaccaattaaagaatgggtatatacaaggcaa  
actcgggttcaggatccactgaggatctgaggacttaaattcgtaaaggtaacctgaacgagtgaaagcatagaatcctctctgtttttctcat  
aattgtagttttcggatcaggtaaacggcaataattggaactgtgggtggtttgttttaccagggtacggcaattcagaatagattcgaggtgcc  
acagaacctttaataaaactcggctcgtttggcatatgaagaccactcaccggttaagctctgagcttcggagacttgcaaaatttcgctatgt  
gattaattgatttggtaaagggttgggtcataagtaattcgaactgacgcagatccttgattttcgagatggtattttgctcaaacgaaacga  
aagctcctggatttgagctacagaatgaacgtgatttttctcggctacttgacgtgctaaagagttgagaacaaggcgtcaacgataaaag  
gatcttttaacatttacagaaggagggtttcaccacccaaggtagcaaaacaggtccaatgactaaaacttctgggattccgaacgc  
tgctttcaacaccctttacgccccttggtaccgtcagcattgattttttacagtgtctttcaaatcatcccgaagcaattctagaattttataatag  
ctccaggaagctgaatagataattgttcattatcagtggaatagcagccgtctggtctcgagagctgcaaaaacatctgactccgtgttcat  
caaaaatgttcatctttcgaagggtgagtgattgtttgcttaattaaaggtattcttttagacgtttttcgacagagactcaagttgcttaaaga  
atgaaatcaggtttccactagatgcctccaccctcaaacgggtatgtgagggagttgcagagtcctatgtaggcatccgtctgagggactgcat  
ctttacttgggtgaacggtttttgatccatggatttggctctgtacaagagaaaacgtcctactgcaaatcttacgactgtagtggtatgttacttt  
caggtgttacttgcgaagagtgaaatttctcaacgtcatggcatgtaaacaaactgataatttgaatagagaatcaaaaacagggaatcaacc  
cattatagacgggtaaacaggcccaaaaagctgtataacttctcattttcataataatattccatagaaaggcgaagagcactcttctttgat  
gtggtcatcgtgcatattctgaaattatggaagccacgggaatgattttcaaaataggaacaaatgctattcattatggctgttttctcctaaagc  
ccgtatataattatgaccaagatacttataaagcagagaaaatccatagattgctgaatgcttcaatatcaattagatttactgaagtgct  
gttaaagtgcttttaggatgctttttccaaaaagttctgccaaccttctctgctttctttcatacataaaacagtttctttggcgttctatt  
ttgataaattctttgtttacatcatatcattatagtgaaagctctgtacattatgtaaacgtactttccgactgtacgcatccttatttcatggaag  
acataggatttcggaaggctatgactctcaccagttcagttcaggattcttgattcatcagtgactttcccttaacgcatcaattttgtgtttatt  
aaggaaaatagccttaagattcgattaccattaaactttgggattctttttgaattatacggattccttgcaattttgacttcttggattgttta  
caagtctttgttattcttgacagcattgtttggtatagggtttgatagacattgttttgtactttctgttttccaacaaacatagattgatatt  
cgtactggatcattctcggctgttttctgatttgcgttataagcgttcgtttatcaactagcaaatcattctcttctgttctgggtcttgattaa  
gcattgttctttgcatatataatgttttaattattgcatcttcttggctcgcctctggagcttctatacatgtggcgaagactctttaatttcatag  
taggaaaaattccgcttcttagtcttacctgttactagagtaggggtttgttgatcgtttctacttgcctgttgcataaatttgcattgatctttg  
tgccattcgcataaaaaaattattacgtccgataaaaagagatccttcttttagcttgcgtgaactgcaaatccaaatcttttctacacattga





ccctgactcctgaaatgagtcaccttctctaaaagataaaaatcgacgttcattttcacctcgatgaactactcgattatataaataattgtctagc  
actcgaatagtagctaaccgtttattgatacaatcaatgagcgaaggaggtctgtatattagatcctggcagagcgattaatcgaactttgaat  
tgcttggacgagatattctaaagagttatctgaaagagaaggtaaaatcgtaattgaaaattcctcaattctcgataaaagcttgcagacag  
aatatgaaggacacaaggagctttctcataattctaaaacctcattttccttgccttattcattgacaacaaaaagcttaattgcttactatta  
gggttctgcatagacgatagcaaatatgtattaatcccgaatgaacaactcaagctagtaattgtggacgttttctggaagactactgcaagtt  
ctttacaggagctttcaacatgaacataactagctagctgtttgaaaggccaatcaaactcatgaagtagctgggtttctaaagtttgcacctata  
atcccaggaaacttttctaaagccttaattgaaagaagcttcttagctctcatgacggtaggtgacttagattgagagaatgagatactg  
agctttaacttctcaattccgaatttatagaacggctaatagaacctgattctgtacgacaccttcttataaataaggagtgataaacatcagg  
taaagctcaagaaggtaaaatcgccatttccagagcattttgcttgaataattgtctgcctttctagcacttaatatggatgcaatgaaggatgac  
aaaggtagattgcaactaagctcctaagatcttaccatcaattgacctaatacataagcgcagtagatacagccaacaactcacttctgga  
gtagggacggtagaataagatgtcaagtacaattggtagtagtatacaatccattcgatgaagctgtgacttagatcttctggccagaaacggc  
gttttagtataaaagatattatcgttgcataaaagcagttataaggtttagggcagtgatagaggctctgcatagctaccatactagaatga  
tgagaggtctctggaggcgggaagcccacacaatagttcatacattttctggaagcccgaatttaagaccggtaatataaaggaggtagaaga  
tttcatatagtgacgatattatgtaaagagctgaattgaaagatcagtagccttctttgctagtgctttagtcaaagctttatgacagtgataa  
tcaagcttctgcttataagtgacttaatgatattcggagaaagtttcaatgaatcgatgatacttctaaactcaaaccttcttacaacaac  
tgaatcagaagattgtaactgattgataataaagggtattttctcagcaaaactcggcattatactcgtcaatataattacagcagttggcagca  
agtgaatggctgttctctggacgttggataaaagaaatcaaaactgacagcagcctaataaccgcatgttccaggatacaattacaaa  
gtcagcagataattttcaaaaattccaagagcttggcagctatatctatattgcatgtcaaacatttttccatagaatgcaacgatggga  
ctgtgggcaactttggcattgaaataggaaggcctcatcatgttagatgcaagtgccacaggataacattagttgtatggcagtttctcca  
actaaaattcagaggaaagaatatctgaaaaagcagaataaaagcatcaggggagaagactcctattagcatatcctcctgctcattgcaa  
gcgtttcagacaattctgagagaaagtaactgaatagtaggatcgtaaaactttaaattcccctcagcaaacgtgaaaattgaccagaagga  
gcaaagacggaagaacgaaggggactgaaggaaaatgcaactggcaccagctcatcttctgggttatccaaattaccagacgaaagtacactt  
gaggccaagcgcgaaagcggcacttcttgaagccgactaagttcactaaatagagattgctcatcaaaattgtcatttccagagccttcaag  
aaagtttcttggagtgacgacgaaatataattgtttggactccgagatgacgacttctgtagctgtattcatcctcatcctcatcttttcttca  
tcttcatcttcttctcatcttcttcttctcatctttctgctgttcttcatcattctcctcatcttctcctcgtatcgttgtcttctcatcgtcattagcat  
catcactttctgggtcatcataattatcatcattattatttttctgttagtctggcactcttttcatcataatcataatcgtttctactgccattt  
catatgtaccctcttctcataatcacgattttctctggtcatggtcgcgagctgtcctggacagatttcaattctccagaatctatttacta  
gatttcccttgcattagaagatttgagctatccgtcgaatacggtaagatggcgaagaaggcttgttttactgaaagttgcaaaaggtgggc  
atttgaaagacattctaaagatttatcttgaatgatctttagaggatcttgggtgttttgcacacctgggatctgacattctaggttttctc  
gcatagcgttcccaaagattcattctgtttagttgattatgtggataagaatagtttacaacactgctgagtaacttaacttgaattcgatcc  
agaggaagtgtagctgaatcttctgtttagtactgattgtgaaggcaatataagataactcatttttgcacattcctaaattcctaagcttttctt  
ctcaaattatcctcaattcacttaataatgcttttggtaaagcactcaagttggatgaaagggtagaatgacaggttgtaagagga  
agagagtcggcttgcgtagggcaattaagctgtgtaacatgtaccgacttcttaataaaacgacgttgcttacctaataaaaggaattaaa  
aaaatcgagtaaaccctttttatattgttgcgaggtgttttagcgggagtaatgagaattacttcagaaatggatgcaaatcacactatgatg  
acaaaaggattagtcgaatatcgaagtaaatagatgtttagctgtaagtttttaagatagctcaattagcaatgttttaataaataaagctta  
cataagaagatggcaactcattatgccatccattggtatgagtagtagattgaaatagaactaaactaaatatttttctcacttctttg  
cagcttagcagttcagaaaatgaaaatgaaatgtcataatacctcaactaaaagcaagcagttatagtttgcacaaagctggactatcaatacg  
aacaattgtctatgtaagctaaactaagtagaagtagtctcgtatgatgcaaatgaatatccgtttataactgtccatagaaattccaacatc  
aggctaaacgcagtaaaagtgactaagaacagcttctaaagctatactgctaaaaaatatttcatataatttcttatttacttttacttcttcaa  
atttataattagaggtatgtcgtcataaacacaagaggaaacaaacggaaaaaaccaagcaccctctttttcagtttctcgtatgtttgattcc  
ttttaagacgatcttttaagagtttgaatgatgatgtcgaacaaaaaacgataaatagcaaatgctctatcgacaacgggttcaaaac  
catcggacttgagactttagaatacattatcgggtgtaaaacttttctgaaaccttatttgattcaatttttgcacgtttaaagccacgctc  
taacaagctgtaagcaaatgtgaaacttgggaatcacattccaatgaacaatggtcggagtaggttaagaccaactgcatctggaggaa  
gaagcaaatgattccaatcaatcgatcttgttggaggtatgctaaatgaaatgcttaggttttcatcgcgcaaataccggtatctcgaccatt  
tcatcagcaagtgaaagaaatagtttgcgacaaggaaatttccatgacggttaaaaaagaagcactcacaatactcctaataagattgtccttag  
aaaagtttcttctgtcatattggccaggcagtagtacgcataaaaaaacgaatccgcacggccaagtagataggatgcaaaaagacctgtt  
gagaaagattcttgcattgtccggaataaccattgaccgcaatggctttagacagcttccagcttcttctcagtagtccggacgaattcgactact  
tcttgcagcgttccgacataatctgctttaaattgtataaaaaataataatttaattaactctttagtaataacaaggcaagcactttaacgcc

agaaatataggaagcagtattacgagaaggagagaaggggtgggcagcacagaaacgaaaagagcaagagctctcattcctcaatcagattcc  
atgaaacaatactattaagagaataaccaaatgataaatatagaaaaggtccaataatgactgaattggctctcttacagctggctgttttc  
ctcagaaaattaaagtcgaaaaaaacgagggacaatttaatacagagcttattttgaatcagtaatccaattgttagaagacacgagaaaagt  
ttccagccttagatataatgtatgttcattttaagctacaaaagacggcaaaaattccttcgggttacgagcatatactccatatttaaaaccgg  
acaggataaagaagataaaatatacctaaataccacataaaagataaaaaaggagaaacgagcctaccatttgcctttgactctttgtttat  
tactgtattatgttcttcatctttatcatgaattatacaaaatcattagaatacgtattccttgaccatcatcattgctgcatttacaggttaacacgt  
acaatacccttttactaaggaacattacaaagagagagaattgagtaacttttccatttaaacgtcaagctagggttaacaattccatcttgag  
gttgcgtctatgaaggattgctgactttatcttctgttttagacgactaggctgttcattaatcttctgatttataagctgttgctctgatattttttt  
ctagactttaaatattcttctgtgtgtttttgttcttcttttcttctgctccaattggcttttcatatataaatttctagctccctccatcgg  
ctgaatataaagctggtaataatttttaaccctcgatctatagtgcttgaatagacaaaaagtcctaaatcttctatcgccttttttagttc  
accatgtcatctagcgtcactcgcgggtcttattatagctgttcgcaaggagaatgtgcttaagaagagcttcagttaatatcaccttctca  
gaagtattatattactggctcaccgcttgaccgaatactcctataaaaattcctatcccagttcattttcaaatcgtatcctttcttctcagagca  
tgattaggcaagattttggaagagcttcgaaaaatcccggagtacattatactgaagaaggtcgtgaagcccctagtattttggaaaacta  
caaaagctcgaaacgaaaatcttacttactccttagtagctttaagctatacagaccatcctcacgtccaggaagcttactttcaatccaaa  
atgttttatttctctatcacgttcatgaaaacataattcgttcttctaccattcttctctttacataaaacatagcttttgccaatcatgaagagt  
cttttactggctagatttaagcacttctgtactcttactctgcttctgtaggactttaccgatctcgtcccgttagtccacataaatgaata  
tacgaaaactccaaatcttagaaattgtcatcggttttgatacagggcagcttattgtgtacgatccattaattacaaatatttacggtataat  
aagaacggccattttaataacagcccagttaccactgttcaatggcttcctaatcaagagtcctgtgttttagtgcctttcaaaatggatggattat  
tttctacgacaaaaatcaacaagaacaacctctgtattcctccattccggaaaaagaacttgaagtcactgtatgaagtacagcggtactttaat  
gtgcttaagacttcccttctccgacgatagaaaacctcaaaatccaattgcttattgcttttcaaatcccctatcaatgccttttccatttctc  
cggatcatcagcattggcagctgtagtgaacgagggactttaaagttttgatgcatacggaaataaagatgcttgacattttcatagctatttt  
ggcggctgtcatgtgtaacttggcactgtatggaagttttagtactggcgggaaggatgatagctttcggatatacttttctcaagaaa  
acttgttctcgttgaagggcacaagcttgggtaatgggtattacctttagatcaatggcgtttagcgcagatagttatcgtatcgcaggttg  
gccttgatcgcgaactactttatgggattttctgtaactgcacttcaccgccccaaatctgcacttattatgtaaatcatcacgcagaacctca  
aagccaactatgagtgatcttgatgatgtaggagatttagacattcaatccggctatacagattttagatgcaacgagataacgattcatccaaca  
gtttctgatcgttaattcaatcatatccccgatcacttcttatactgttagcagatgctcccgaactctgtttttcaacctgattgatgatta  
cctgttcttaaatggaaggattcgtgtttggcaaagacctaatgctgattaaaagctatacttattgtagaagcttaattccttaacgatctttg  
ttttatgatactttctcagatggatagagatgttggagctttgttttattcatataggttagtaattgattacgtatgatttttagtttcttaatttga  
aaagttgattgctttattgttattgttcttcaaaaatttcccaatcctcaaaataagtttggaaatataactaacaacctgaaattattataaattc  
taaattacttggcagaccagaggttgaataataattcaaccttttttagacacttcagaatgtctcataactaattggttgcgttcaataaa  
agtatttagttttattttatttttttgggaatcgacgtaaatgagaaataaagtgagttagatttctttggcttaccattcttcttactcctcc  
aaattgaaatcgcaagtcaccgttacaggtaccactcgatgcttagtttaagacaccattccagtatatgtaaactatggagatccttatgtaga  
gccgaaaattaagaatgctttgttagaaagcggctttcattgaaattgtggactcgcgagctgacgctaattttttggcgcaatagaggat  
atagattttgacaagcttaccacgatcctgagacattagcatgcttattgttattcggaaagcacttattcgaaaagaatacttatggaacacgg  
tggtatactatttagcaaaagaatccaggatcgatataaaaaaggctgttctgaagcattttcttagaactgattatgctgagtttttagatgac  
tcaattatggagtcttatgagcttagacaagagctcgaaaaaaatgaagacttagaacctcagcaaaagaaatggtatataactaaaaccaagca  
tgtcgcaggtgtcaaggaatccggatttttctacgatagaggaactccaatctatattgattcctcagatgaagcattaagtgcgaagatga  
gtccaatgattcatctagcgaaaatgttgggaaaatgctgattcctccagagtaaatgaccggaatccagaaaacaaaatcgttatacatcaga  
ttcgtcatttcttgcacaacgctacatagctaaccctttattacttaacaatagaaagtttcatatccgtgcatatgttttagcgttggaggtctatc  
tgtgtatttttaaggatgctatgtttgcttgcagagatgaatagaatcctcctcatgccgacactaaaatcaacctatagctcatctgagca  
acacatgatccaggcgggaagtccaagagaatcatctgtgcaagcattttggaatagttctatataaaataaggacaaagttttgactcaatc  
gtacaaactttgggagatgtattgggctgttcaactactcaacgaattcattttcaggtattcatttctacaagctatgattttatataaacia  
ctgactaacagatttttagcctctaaataactctttgaaattttggagttgatttcatgatcgcgaaactgatcaagtacacttactagaagt  
gaatgctgtaagtaaccggtattcgtttatcgaaccaatgagataactaattataacagtttccagattttagacagacgggtgatgagctgtctg  
gtttgggtgaaaagttattcaagctgtgatttcaactgcaattgtcccttttttaactcctaaaggtgaagcacgagccttctcctgatttagtttagc  
tcgagcttaaaaatttaggttttagtagtctttcgcggagctactttgatgtcacagtttagtcagctatagggtttttagtcttgagttttgtc  
actaaaaataaggtataaagaagtaaaaaataaactaaagttcacataagtagtcgggtactgtactacttttatacttactatcgtca  
acagttccaactgttgaatcttttaagcctatagaaaaatgttttattacgctttaaagtcaggttttaaaaaattttagaataaagaatta

ttacattcattgcaaccaatgtacgcacaaaagtagcaaaaccttggcagccaacttcatttacggccacatatattacggccgggagag  
cgtatgttttgagtttattaggattacaagaatctaactccattagttacaccgaaaataaacgcagatgaatatagagctaggaggaacaat  
gtagcagagctcatgcaagaaggtgatttattgattaccacttctgctgtggaagtaagtaatacaaacgttattatgaacaattcaagct  
aacaactttagatataatgtgtggcagcctttagtgcttcaatcatggttctgattgtatgagctaatgaacatcatctagttatgagtacat  
caagaccaaattgtaagtcatactataaatacaaaatthtaacatttaacagttactttaaccggtaacggctgctcaattcttctgctgttcg  
ctaacttgacaaaggatgcttgaacctgaatcagtcctacttctacgtatgcaattaggaagaagttttagtactaatctttattagtaaa  
ggagaagacacgcttgaagattataagatcgctcttttctccaccccaaaaattcgtatgaagaaaaatgggaaggctccgcacaggcgtag  
aaaatggaaaaatthtattccatattgagaacgtaagtaattgcacctgaaacttattgacttaaaatgaagattcaagaaaactgggaagcacc  
atthtgattgaagaattggtaatagatgcaaacgggtattctataatacagagaggttaccctttcaatgatcccgtagcttctccctgatg  
ttgtgcgagataaaatcagggagctgaaggaagaagccatttagatccgctaagagcttctcatccttgcgaacaataaaaagtgaaagt  
gaaattcatgtctacagcgtgcagcgtccgtaagtggaatgcatacaaggaagtaagagaaggaatttctggagaagtcagcttctgctc  
tgagcttgagtatagattaaaataggtggctgccaagatcagcttatgtactgttggcggaggaagagtaagtttctatgtgaaaaagt  
attcacatttagaaacataaatcatagtttctttactataacatcttagtctaaccaagtttagaatggacttacaatccattacactgcgaa  
tgatgatacattccaacagaacgataggtgttagtagcgcaggaggtgatgtttttatacacgaaataggatgctaataattataggaatag  
gaggatattgtacagatatacccggacttggcggactggaaggggatttactccagctcagcagagattgtaccaagctgtttgaaatgtaaaa  
agaaatgcattgagttatgcaccactagcacaggattaagttggcgcgaattcattatgaaagtgtattctgttaaaaggagcttaagcaa  
attggcatataggctcgaatcggataagcttgaagaataaataatcaacaaaactaatgtgtttcaggaaatcgaggatgtttatattccac  
actctattggctcatgagattggcctagaaatccacgactgttttaccacaatagctttcaccgttaagaaaaaccaaactcgtatgtgatctc  
attgagctttcccatcaactgttttaggtgactatagagcccgaatctactgtccatgaataaccgttggccaaaatgggacaggggattgc  
tattcgtatagaagatagttgttggggaagaagaatcttgttttaacaaaagatacgcgcaaaaggaagtaaggaatccagagctac  
gcgaagaaatctttagaagttccgtttcatttgcgtttccgtttatatttacttttttttgggtattaaggaacaagttggattttgtgtac  
tattgaaactgaagaacagaaagatcaaaaaatggatattggattaaattgtttccctagaagtattcttattgaacgaataaaaagtat  
ttcaaaaacctaatataaaaaagattaggcatccgtaaagatgggttctccgacttcgacagtaggcgcttaattccttagcactttgctattht  
ccatcgtcaggtatttcacttccagatgaccaataatctataaaaaaaagggttaggaacaagaaaaaataatcaacttgatacta  
cttataatccaatcaggctcatcaaggagacggtcatattctggagatcagatacagaatacttatccagcttcttttagcaaagttgacaa  
gagtagatccgtctcaaaaatctcttttctcgattgatacttagtcttcccgttgtgattcctctgtttcaccttcacgatcaactcattaaat  
caccttctggttaatgaagcgaagccaacaaatcttttaaatgaaagaatccttacaactgaactattgatctgattaaaagacgttctca  
acatttctgctgatattggttatgaacatagctaatctcgagcgaatacgtcgaactaaagaaaagacaactataaacgatacccaaatata  
actcaataatcttctatctttcatttcttcttcttctgtaatcttgttttaaaaaatattcaacttgatgttatatcatcttaggagttg  
aatgtcatcttctaccaagtcctgctaccacccaaaaagtgacagcgaactaaatggacggagaatctatatataggtttatcagagagtcac  
caccaggtgaagtaaatcaagtggtacaaggaataagttgttactatcaaaaacgacttctcacactgaaattatagatcttcgagaactggatt  
aactgatgaggaacgtatccaaaaagaacttcaattgcatcatgaagattcgaattcccctgtaactttatccaagatgaaagggctgctcttcc  
tgccaaaagtaaatggacaacggctgctattatgatcaacgactcaaaaagtcatttgcagtgaaattatgaaacaatggtataataagaaggat  
ttttaaagagagttatcgctaactgtactttaggaagcaattgacgttgaagactataaagagaagccgactatctcagaggacattgttaa  
acaaatccaaaaagttaccttggatcattattgtctgatgttcaattgcaatcatacagaatgacgtgaatgttcaggagtagcattatactg  
gtgtctttgaagtataacctcaaaatctacaatggctgttggaggtgtgtctgcaagatgacacagagataaagaagttagttggaacttcg  
tttattagggttcattattatgaagacggaaatgtctggttagatgctgagcgtcctatcgatgtgagcgtcaatgatgttgggaagctttcagatgc  
tctaacagaagtagagaatgcaaaccaacttctttaaattgtggaacttctcattgaatgataaaaagttcaagaacttcgccggcaactcc  
tattacagcgcaaaaatcaactgggagaatgtttgggaatcgcagatgagaatgcataagcagatcatgcactgcttctcgaactttatgaa  
acgtattactattcttagtctgttcttttaaaccttaccctttggactttagtagagatgacaacttttctccttctttataatccatggt  
ctgtctttaaaaaagcattgcttggattcggaaattatcaatgctattcaatgtcttctgatttttccataggtgtgagtttctggttgaatg  
ttcttttccgacctgttaacagacaatagaaaccagacattcatttcttttttttcaatgaaaatctctcattctcatgaactctgataata  
aataacttctttgtgcaaatctcaaatcgaacacacagtaacatgaatgcacaccgttccgatcaagattaattataatcttgatttctta  
tatcactcaatgtgaaatgtgatcacatttcttgaatacaaaagggatttactgtgacattcacggatacaggaataatctgctttcaagaa  
attgtactctcattatgtcttggttacatataataatcgctgttaaaaaaccgttccataggacactatacagataaataggaacgattgaca  
agaacttttgatataaggcatatataataacataataatctgttttctttgatttacttattatcgaccttgaagaaagacaaccagtcgga  
attgtatcgcgtcaagaagaatcaagggtattcttctgcttgaagatagaaatcagcatattgttggcatttactagatagatttcttaaaa  
aataaaaaaattcattaaccaaggtcattcttcaatgagcatataaccatgttgaagaatccagaatacaatcaaaaaactgccatttcta

tatcttataaatgtaaagttttaaattcaaataccaagtgaaaattcattttccattcaactgaattcctcagctctgaactgtctagatgaacaa  
gtcgattacatgtcatccttggtttttcatctataactttctacctacaaccaaagcatttatattttaaagtagagggaaaaaactaccatgtc  
atTTTTgaagcattaggtgtaagtaatggctaataaaggctcttaggattgtggctctgttattacaactaatagtctggaatatgtgcagg  
attggctgtggattgtctctgtttccagttgatacaaaaaactcgattgcaagcaaaaggaggatttctgcaaatgggtggtttcaaggcgtat  
atcggggccttgtagcatcctagttgtagtgctccgggaggttaattgaaaatacagaagctcaataagctttcattattaaattatcaaca  
gctaaaaagagagtttctatgaaggaaccttaactaacggcgattgttagcttctgtttttacgacttatgagaccatgaaatccaagttaagc  
cgttctggcttaccattgtctgaaccagtaattcatatgactctggatccatgggtgaaattgccgctgttttagtacgagttcctacggaagtaatt  
aagcaaagagctcaagctctggtggaactcttcatcaagaaatgttcttcaacaatttggattctgagcaatctggcgtagcttatattccg  
ggtatggattactattgcaagagaaatcccgttcactaatacagttccattatgggaaatcttaagaagacatggaggacttcaacaacc  
gagagaaaaattggctcacgaggccgatgtcaggatctatgcaaggaggaattgctgctgcgcttactactccccttgatgttatcaaacga  
gaattatgctctcaaaaaggaatgatatactgaaaagcttcatagcaaatatcatcccttcaacatgagcagagagatcttatgtgtcta  
cagtgaaaaatattattcatttagagggaacacgtgccctttctcaggtatcgcttctcgtgttctctggcttagcggagggtgcatcttctag  
gatttatgacactgtcttcaattttacgatcaataaaggatataatgaaaagaattcatacaatcttttgatcattccaacgctcttcat  
ttctcattacatcccctagatactttactctagcttttgcttctgtatcagcatgcctaaagtgctcaatcatattactatagatgttagatt  
tcttgattatatttttggtgattccactgattttcgtataacttagatttaatagaagctttaccctaaagacaaaaatttaccctaaagata  
ttagaagctgtcgaatgaaaagcatattttaaagtgtttgtataataatgtaagtgtgaaactcatttctgtattcttcaattcccttgaca  
actccaccagttgacctaaattgaaatcaatgtattggtatttaaattagtcgaaaatagacctgagattactattataattttaggaacttaa  
ataccttttaagttcataagcattgcatcgaaggtgatacaagattgcatcagcgtcttaacaccaaactttcaaaaaagtggtcaattaac  
catttaattgagcattttgtaaaaacatattttatggagaagcctttaccctaaaccccccttagttcaccctaaagttgctagcattcgtgatggtg  
aagatgttattctgacgacctatatttggtgaagcgttatgaagcagcatttatatcaagtctggagtagaaagcgtcctgcatagctttacg  
aaagctgaagagctagagatgattaagctgagcttctgatcgcagacagccataaccgaccgatctttagaagtgctcctcaagatact  
atgtggtccttctattttatgtaaaagataaaatataatgaaaaggctggtcacaatattggaccggccattttgttctcgtcttcaagcttctc  
tgataactcaatcacaacatgaattttcttcaacaggttaaaagcaattttcttcttcccaagattaaaaataaagatgcttctgtcttttt  
ctatctgacaaattgtttgtccaaactcgtggaggatctcacgaacgttccaatttttgctctatcgtgagctgacctaccaaagagcag  
atcaatgatatgatcagttggtgagatataatcattaaatgctcagaaaaatcctcaattcgaacctcttctcctcagagcttcaacccctccc  
caaccaaataagtaatacaaacgactccccgaaagatgaaaactttgagacgataggtgtaattcaaccaaatacaggaaagtgcttctac  
tgtcctaccgatcatataaatccagttcacaaataaataagcaagcaggatctgaattttctggagcactgaaaactcaaacccatagga  
atggaaatgtgaatacaaaaagatcttaataaagaaagaacatactccccgtagtcttctcagacatgggtccgtttgactatgaccaa  
caagccaaggatttaataatgaaatagtggaaaaaatgatccgtcagctttacggtgccaattaatattatgaaaaactatacgaaaatt  
gttgagcttcaagtaactaaaaaagttcaaatagctatcaggaagtagctgaggaatcgaacactgtatgaaactttcgtgatgaagt  
aaactcttcaaaaactcaagaagagaagattttacaagaaaaagtaacgttgaacgaaaaattaaggcatalcggaaacga  
acatttagcagctaccgaacagctactacatgattgctattgcacagttcgatacagaagtaaggctataagccttgcataatcctcctgatttt  
cgttatatgaaaagaattgtaaagttctgtaacgtcactctgatggtttacagctcgtgaaattccggactgcttatgactaaaatattgctggat  
gctaaaggctgtaataaataagtaactaacatggtattgttaattttttgctttaccaagcattaatacaatcgtttgtaacggctttct  
ttgtcagattctcactttttttgttactatgggagatgtaatacggactcagctgaataaaaaaggatttagatgacttcagcgt  
acccaatcaattaaatcatattctaggaaagcagatcatttaatagcgataatcgtttgctttttatccgtcactgtttgctagcagctttttgct  
gtaattttctcgttatcattcctaccgcaagaagccaaggtgaacattggctacaagggaactttcattaccctttctaggactagcaatg  
aaagcaacattacaattaatcaaatccggaatcgcgaagcagcattgttagatcctggcagatggttgatacaacggattcaatactacgt  
ttaccagtgaacgggtgaaaccttagtatcatgggacttaataatgatacttatgatgattcgggtcaagcaatccaacagttcctcctttaaacca  
acctttccgatggcaataaccaattcgtggcgttaacctgggtggttgcttcaattgagccatttattactccttctttaaagtcaaaaat  
ggaacgactatatactacgcatgagtttaagtttacccaatattctcagaaaaagcaacaagagttatagaagagcattacagtagctttgt  
aacaanaaggacacttgaggaaagttcgcgaagctggactagatcatgtacgtatcatttcttttgattctggaagagatgaaatgtaac  
aagtgttctgggattggttggttatttattgagagccatagaatgggctcgttctcaaggttacgtgtaactggaccttcatgagctccag  
gaaaccagaattctggaatcatggtggtacctgggtcagtttaattggcttctggaccgaaggaaacaaaatgtaactgactttaaga  
tacatgagcaactatcagccttcttctcaggatagatacaggaatgctgctactattacggattactgaacgagccaaattctttgtgacggat  
cctaagtaataactgattggcataaaaaagcgtacaaaattgttagatctactcatccagcacttgatattataagtgacggcttctggggac  
caggttaattgggaaaaagagttgatgccttccattttccgaatgtgctcattgatgcacataggtacacaatttcaatgattaccttattgccttat  
cgtataaggataagcttgacattatttgaactcatggagagagggtgaaacagaaagcaagcttcaacaatagtcggcgaatggagttt

ggctgatactgattgtgctgagtttctgaacaacgtgggagagggcgcgagatgggatggaacatttcgccaatggatatgctcaatgctgtcc  
tcttcaaagaaattgcacttgttctttgctaacgatgatcctgctaattataaaaaagagatcgtaagttactttataacttcgctactgccaaa  
ttgaaactttcgacagaacgtggggttgggttctattggaattgggatacgcagaatgctacacaatggagttataaaaagtctcgagcggaagga  
ttattgctaagttggcgactcaactgaaagaacattcaattgagatgtagtacttttaaaaactatgggatggctggaccgattaaatg  
ctttcttttcgttatatttcttgatctctttggataagcgtatttcgaaaaaacacaacttttgacagatacttttaaatcatgatgatagttag  
aattaattattagtaataatgctattaccttttaaggctctttataatgtctgaaaaattctagggataaaagagcacataaatacaactgaccga  
attaacatattcttccatgatacgtgacctgatttgaaccagataatatacgtttccacaactgaactcccattttaacgttctgcttatagtttc  
ttcttctggatccattctataccttcgcaacctgcagtaaggcttcttgaacttttcgaagtaacgataaccagtatagtgaggtcgagacatac  
gtttatgaaaaacaaagcttggacagcagcagcgtagcaatttcaataacttagcagcttttcagcaaacatcatgagtaaatgataagcgcc  
atagggtagcatattcgaagatataatcaatgtttccataagcattctttgggacaatatcgccacaactgggttaggtgataaatatcagtt  
tgatcttcagacatacaatgggatattacctttcgtttatctgtagcgtgctcaagggtgggctccaggtttacaatacagaccttgcgatac  
cgatcagcagaaaaacaagcctaactgattttcgtgggtatacaaacctcctcttttagtggaattctccgatgatttcttaggtcaa  
tgacttcgtttttcgaatgtcttcaattgcaaacaccggatgatctttaaagcttgaatatttttggaaatcccttctgcttgcctcaatctcaac  
aattcggcgtcctctatagcgtactatctatacatctcctgtggttttttaattggataaaaatgaatttagccaatcacttccaaaagggaa  
aattcaaggcgtattctcatgatacgaataatggtgtaagtgatcgcttgaacgtcttttaatatctatgagaatcgacggcaaaaacgtaa  
gccatttggtttaaggatctgaagaagatggctcaaacggctaggcttaccacagaggaggcatcgcgaaaggatcgatgcaaacccatt  
tttgattgatgtattgaaagcttcagcccagaaaacaggcttggagaatcaataagttgctgttcataaacagcaggtgatgctcgaataggag  
aagatgatgaaaaagttggcttaacgtccttctacgttttggcgccgctggactgacatcagaaggattcggtgaaaaagatattcaagctat  
cttgagaaaaatagcacttctgtgactttgtcctcagcagacgcaccaacaaagcggaaactcaaatgctgcaagaaaaaacaggcg  
cgcaggaatccaaagatcgaagtagagaaacaataactgacatcccagctcgggtcacctcaagagactttgctgccttaagaaagtctt  
ctttgaaacagggtcacatcctaaagtgtcattttgtaaggccccataccaaggccttctgaaccgcttctgataattttgaaatgacgcttccat  
atctcagttatgcaactaaagcttgatgaaagctttatctggatcatttctgacttctcggcgcaacagtgacagatgctttatacctgggtg  
aacaacctggcaagattttgagaactttatctgacatgaattcctgatacaaatgataggttaaggcagagtaggtgacttggatgaaat  
ttgagctcggattttccggtcagctgagtaattttaaactcgtttttcgtggtttttctctcgaatcacatttctgctatttatacctttcc  
gtgtccaggttgagtggttcttcaataaggtctttcttctgatggcagctggttgaccaagtcaaatcaagccagctatttctatcttgccta  
ccagattctcattgacattttaataaaaataaacaggctaatccctcgtcctataagtttctaactcggatttatcaacccaaaaat  
aagtctaacagattcctttcctaaattcaattttcaactaaaaataactttacgcttcaaaatccttaggtactttcgcaattctgctcatatta  
gatgtttcgttgtttatgggtgtttatggaacctcaaatctcacaagttccttcaattgacatttccgctcctcgcaattcaacattag  
agtaaaatataatttctacgttaagttacaattcatgaatagtggtattttcaagtttaagtataattaccttgcctttttactaatattcttgggt  
taacgaaatacaaatccttctcgaagcgtatgacatcgtcaaatcgtgctgctcctataggataataagatgaagaaagcactaaagaacg  
aattgcttgattattcataataattgttgatatttcaattgaaagagaaaaactaagaataataattatctaggttgagcggcgatactccaagt  
gactgatctggaattcacgaatatttgacattaaattatgctgggtgactgaacgctgtttatttctgatcaagagaagaaattgagaatatt  
caagaattctcaactatgggagggctcgggtcatctcggctgatatttcatgagtgataggtcttcaccgaattctgagacatgggaagccggt  
tgtcataaaatcaggttaaacacagcgttaagtgaaattgagctagaagtataataactttttgtattcagtgacatcaactgttgggtattagatt  
acttgatcattcagggaaatgaacaaggagctgacttttgcgtctgaggctggaattgaagactactttatccggaagatccgagagcgga  
tggaagtttgaaattaattcgtgaagggtctatcaattcggcaattatcagcttaatgaactagatcctgaggtatgccacaaactcacttact  
taacgataactttacttcaactttcattataaagattcttgacaaaaattctgagcttctattgaacttttgcgcttaagcttatagagctaat  
cgtgaagccatgaatcgagacgatcctcagacgctacgatcgagaaatgctgacatttgcactgaaaactggctcaattgcacctttaa  
ccttcttttctacttcaacttgagttgacaatgtctttgctttccaccgcttcttatacaccggcactaaagaatcgttggatcctcccagcg  
cgaacgtgttgcgaatctggcaacttggcgatgctcaaatctcaagggttgcgaatgaatctcgggtacttgccttagtcaattttgaaaattgg  
tgtaggaaacaagcagaaaagcagctgttccacgttctccttttgcataaatcccttatgattaccctttttatgatcgtatctgcataatcacta  
taataataaaattacaagctattatgaatgttaaatggattacaatctagtatatgagcgttaataatgaattatagttacaaaaatggcta  
tctagaaaagggtataaaaagaaaataatgattgatgctgcacattgcaaaattaggtgtaaaatcttttgttgcctgaataggtcatt  
aaaccattaacaaaaccgcaaaaataatgaagattaagaagattcgttggtaaaaaaaatggctgtttgtaaaaaccattatgtacatt  
ccgatggttctcagagctcattcaaggtcgacacacctcaccatgacaataaaaaatagcaatctgaaaaagggatggctccaactagt  
acaaaagacaagttcgaatgtgaattaaaaaccagggtcttgaagaagaagtattgacattttttagaatcaagaattcgatttttagttat  
tcagtttttaattggacaataagatcacaattgaaatccacgtcgatagcaacacatccaaaaacttatagccttatcaacattttgctgactt  
catcagtaatcacactttaaactcattcccgatcatgaatgcgcgatcagccgttcatgctcctccttgaagtaattatacagtttccaatgaa

gtataattacgcctcaacttcttattaatctcgaatgaaatagcaacaattatcgactcgggaacgcacaacgaggttaccaggtatccaaaa  
aaggcaaaaagacaattctaatagaagaagactcttaaaatagaattaaacgtttgtcttctatgTTTTtagatatacatctcgttcttaaaa  
gcttgcttacttttaaatTTTgatgataggaaaccTTTTctgtagtataaaacatcgtcaatgataccaaatagTTTTccatgggttagctcgt  
cacaagaaactcgcgcgatggaataccaggctagcattaggccccgaaaccgataactatcaaacagggagaactgtcactaatagTTTTctc  
ggtaaacacttacctgccaattcTTTTattacaatcgataagcgggtattggattatatgaacaaatcattataaaacagctcaaggatgaat  
gaagatcagttccattgtacttatccatttccaatcaagcagccaggctgtctttaggcagagctTTTaatcagtagattttcctgaatattagtaa  
ggggagttgtatcccatttccaaagttcaaggacgatgggggattaggcacgcttctcgtatttaaatagatacatagccctctgtcttctcgtatt  
gccgttgattcaagattcaataggagcaagcttcaacgactcgttatcaccggatactctcggaatgaggagtaagtagaactgaagaagt  
acgagcagggaaaagcgttctggattacttctgctgtgctgctttgtacagatgaagcgggaaagagatagaagtagattcaggtcgcgaat  
tcaaggaaacgagaacggccaagataagaggactTTTTcattagagtacacttatacagttctcctggggctgagagctTTTTatttggtag  
tttgacttcatagttccaatccatttcttggcgatggtaaatgtctgtctgacaggaagccgatgatgatgatggttatggaagaaagat  
tataagatgggttcaagttccagaaggggaagaagcTTTTtgaaaaaggcTTTTtatactgctgaatcgacgcgcataattgagtaaatt  
tacctttagagggtcaggagcagctctgtagggtgaattcgctaggaaaatcagatattgagtagctttgcacatgcttgatctcctcggTTTT  
cgtacgccgagcttctgactcagcctttccagaaagcgtTTTTctatgattgaagacgcaccatcctcatgggaatttccaggaacatccaaaa  
aaacaaaattTTTTctgtgagaagaagaattgatgaaatacctaatacaacaacgaaccgtTTTaaagctcaaaaaacaaaagaaaa  
acgaatgaaaaataaaataagaaaaagaatgtcaaaatgtgtaaatcaaaagaaaggtttagagaaaaagaacgacacaaaagaaag  
gatgaaatgTTTTcaaacagctaatcaaaattaagaggatattaatacaacatcaagcgagaataaccagttacgtgaatttcttgtgtct  
atagaagtactgaaaactTTTgggtgaacgaattgacattgactgtcacctgcttagagtaacagccttgggtacaacgaaaggaataata  
agcataaagatataatcaagtattaagcatatgctattagcgaaaaagaaagtgagaataatgaaagttcatctggagacaaaattcggcaaac  
cgtttggatgaagattTaaagttaaaatagaaaaaataaaatgcaaaaaaataagtagagccaaaagaaagtgaaatcccaagatttctc  
aagaacgaaaccTTTTgcccgttttattcgggtgctgaatctaagaaggattattagctatataaaagtgaagacaacttactctggatgca  
aactgagtcactcgcgatgacaccttgtaccatttgttctctatagatgtggatacgtctcgcacccagattTaaattgtgaaaaggtgatgat  
gccggacagtttcatcagaaacatttctcctcgttctgattatttccagtgaaaggaatgatcctcactctttagtaatgggaattcaac  
acattcacctacatagTTTTcaggcagctgtagtatactccattcaatttcttctcgaaaaatgcaaaaagttattagaatcatcttatttga  
gatttTgtatgaaaaattcagaaactggagctggatcctcaaaaccaataaaacaaggcattaaggacacatttctctggtttcctcgtttt  
cgttttcaaataggataataggcttctccttgatctcgtctctgatcctatttattctgggtctgagggggcactcaattcgcaggtgaaatc  
gaacaaaaggtcacttatagcagaggaagattacaattTTTTtatactgattagttctacacagaaatccttagttggaatgtaataaaaa  
acaataacaattagtgatggctgTTTTcaaaaaatcaaggtagctgtagcctcagtaacctgtacatacagatataatacaagattacataga  
aacattcccactgTTTTccttTgtcaaaagtaaaaaagaaggaattcaattgctgttctttagattaaactactacaggtaaagctcctaa  
aagcaatgatacaatggaaattaagtcagtcagtcattattgTTTTctgaaaaaaagatagaatataatccttctgtcctaagcaaat  
catctgtggattaagcttgcgtaaaaaacgcgtagatagattacggtaatcaagtagactggcttcttcaataatgaggttttctccagta  
aatctataattagctcagcataaagtgaaatcgccaagaaaaccaggatcttgtgtaactgcaagaagtgacatcgacagactcgtgcatt  
aaaccaagaccagcagtagaaccttgattgtgttataaaagagcgaatttcatcatcatcaggaagtgatagcctgaataataaggctcat  
gggcaaacgttgcgtaaaccaataggggaccccaataccggaaatgacacttccctttaaagaatatggatttccatcgggactcaaaaacca  
TTTTcttTgattcaagtacagggatcatcgcgttcgacaaaaccgagatagggcaacgaaaggagagaaggaatgTTTgcatccatgaaa  
atggcacttccatccatctacttataagcgtaaactTTTcaaaatttaggtgcttacaatccattttcacgaatacattctgatatttTgta  
gcccaggtcatggcaagtttTgtaaatcagcatggccagcagcttccagcatctcataaaggtgggaaagctcaactaccatcatggcattggc  
aggaatgagatactggagaatagatgcgtcatcggaaagcgaagcgttgcgaacgagcgaactatttctattgagaggaagccacgacc  
agaaaggccaagagttcagttccagcatccgtctgacgaaggaaaggtataaacgggatgcttaggaaggccagttctctcgtcaaaagtggga  
gtagattgttctcaagactcggaaaataacctgcacagtagagatccatttaggggtaagatagattcgtcttTgctataaagccaataacta  
tgggaaagcttaagaaggctgcaagagagtcagactcgtacttaccattcgaacacaacctggggatcgtatgctggagttacgcggtcacttTg  
gccattgctgttccaccaataggttTgttgggtggttgaagcattgtagtaggaaattgaatcagcattcagcttgggttggatggcac  
ctaaaattaggctggacaggggacgatctgattTaaagaggaggtaaggggcaagctgattggcagagtcacggatccattcagcaggaa  
tgtctcctgtgataacaaagttTgtggatgctcagaatactcagaatgccagcgaatgggtgtccagagtggtgggcatacagtttTgaaaa  
gacgagcagatctcgtcagcaagttggctTTTTacatcgtcaatcgtttTctacagcctgagaatgaaaagtcagacaggttTgtacaggac  
gctggaacggaagcttccaggaacatcaaggggaaagtgcttcttagtgaaaagcttTaaattgggacatgcctaaacaagaataaag  
gttagcaataaacgaaaaataataaagattTtagagaaataatagggcacaagttaaacgatcttTggacaaggtgaaagagaaact  
TgagttacgaagaaaaacaataccttccaagcaaatTcaaaggaattggccaaggagaccgaaaataaaataaaaggctcaaaaaagc

atcatttgcaatgaattgacaaatagatctgccaactgcaaagagcaatttcgtgtatgaaattattacgtttgtatttatataactcgtccacgca  
agtaccatgtgggggacgaaatcaacaaagcaatgctgcatgcatagctggcaatgtaataaaaggaatgataaataaaataaaaggt  
tactgtggttttgatggtgaatccccagcgtataataagaattgaattgatttagggaaaaatggctaacaaataatcaataaagag  
cttctctgatagcaataatccactggtctcacaattcaattccttctcttgaattccgaataaattttagagttatattctgcctttt  
ccctaatttcttggatattcctttagtcttttaataatactgaccttctcataaataaactgagcaagcaaatgtataggagtgtatta  
cgaatgcctgactatattacatgaccatcgaccattcccttagtaataatacaatattttaggcatattgtattgagccgttccaagataatt  
taatcgttagtaatatcatccccttttattaccgaagtggcatgattcgttaatcgttcatcatacgttcggtaaaaaagctcattgccctg  
gtgtggactcgggttttaatttatcaacaaccaattgcaacgctcctccgccacaccgtcagctttgagttcagcgttagtttgattcgag  
aagcagttctgtaaatgtgaccttttctcatcgattatcgtcttattctacaccacaacaaacagaatcaaaagaggaaaacaagttagaaa  
cctggttcttatactttgtttcgaagattgtcattgtgtagaaggaataagaaattttttcgggattgttaatctcgtcgtctatcatcatt  
gtttttcattgttttttttaccattctttttataaggacaagggatcgaaccattttctcagctcggctcattaccctaaagaattgcctttatt  
gctcttctcgttggcgttggcaacttagcaagttgttctgtaggtttgttcgattctgtctttactgtgatacattgctttgtttgatttctgtttat  
tctcgtttcgtcctctttttcttttagttcgcattctcatatctccttctcctgaaacaacattattaagtttttttgccttcttctctgtg  
aaaaaattactgcgcagcttctgattgctttttgtttataaagctataaaagcgttgggtgcgtaaatcatagctcaagaaagcccttctatc  
tatctacctgattaggagtctgactgaaaacaattgtgcaattggatcaactcgtgattgttttagtggctaagtgtcgttttcatcagaata  
cattttttgtagtctgctaaaatgtttgtttgttctttacgtcctcttggtaaaaaactccctggaattcttagattacagctta  
ttattttgtttcttcattttttctgttggctgatctctgacgttaacctgttttgttcgcggaattactttctttcatctgtttttaaccgtta  
gatttctctttttgtgtttattttgtttggattgtacacaatagataaccaccgtcttcaggtttcataatggatatacaaaaagctcgttttg  
caaaatattgctagacaaaccttagtaaaaacgtcgtctccatcgccctcctctaaaactcaaaatagacaaactggattcagcagcagca  
agctcaatcaaatgtcgcaccttcttctaagcaaaccttctgaacactattatatttccgaggaagactatctaccttgaacgtggattt  
ctataagtgtcgtgacctctctatctgatccaaagcagactctatctactcagaaccattctaaatatttagatatcaatggcattccacacct  
tctcttctcctcttgccttcaactgtatgcaacctatgacctgaggaattagccaacaatcctcaagaacttcttctgccacctctctctct  
ctttagagactccatctgctctgaccagctctctatagatcagcttatcctccttcttggaaatcttcttggcttcttaccctccagctcctttctt  
ctccagcgaatatttcttttctcagcgtcttctcatagtaactgtccattcacactttgagttatacaagattgcttgcgatttccaggagtc  
ttgaactggagcgttttaactcttctgaatgcatgcaacaatgattattatatacaatcttctaagaacatgcagaagcttatcaagttta  
ttagacatgttaaatcactttattgttctgatgcaaaaacctcgaaacctcattaccgcttctgctcagctcgaaggtcattgatgatcga  
gtaatttctgtaagtcgtaccggttctcagcctcatatcgttaaggattgcaactgaattatctgattacgctctgaaatgccttgcaa  
acagctgttttatgtacattccagcttgataaaccacaatattccctattccaattcttctatgcttcttcatcagctctatcgtcgttatggaac  
ttctagtcaattgaagtctttattgaaagcattccttccagcttatccaagcagacagccatcctaattacttctgccttatccgagcttatgg  
aaaagccaaaagactggaagttgcttccagctttacaaaattatgttatcggatcccaccagtaactggatagcacaatgtagagcttg  
ggaagccctcatggaatcctatttgaacgaatcatctcgtcgggaagctataaactcatggaatcattttcaaaaatacaaaagatgaacaaa  
ctattcctgttctgctgtaactgtttcttgcagactttctcttttaggaagctacaagaggctgctatctggttagatttagcttggacaagat  
taacagctataaagaagattctgcaattatcttccatcttggagcggcttgcaagtaaggacgtaaaccttctgctgaaggtcgttggaa  
gtttacactgctgctttatggaagaacataaggtactttacagatctcagttattggtggaaccaataacattgatattttaagattacacg  
tctaccggtaataactctgtttctattacacaattgcaactttctactgtttataaagcattgttgataatggttatgtcggctcgttctgccc  
ttactcaaaaagcagctggagccagagtttgacctcagcaatattccttctataaacacagcagcttacaattgctgatattgaatggttct  
gggatatttaccaaagtcaactcataacgattccaacgtttgtttcattactatctatcctggaagccaagtaatttctcaagttgatttgt  
tgctcattgctcacacactgtgcaagcatagtgaaatcaataaaatgtgaactcattttaccaagagtatttggatttctgcttgaatatg  
cagctttaaattgctgcaactgagggatcagttccagtaagcagacctaaggagttgttacaagtttctctagtaaggaataacctgcatc  
ctttaagaatgtcacattttactcgttcttcttactgagggaaagatgaatattggttgaactagtcgagataatattgttctgaagccgtc  
attgggttttccactgacaataaaggtcaaaaaatgttggcagatatttgcgaagtctgctatttcttctgatcattttcagttaatcgtatgaagt  
aattctagtgtataaaaaatggtgctgagctcagctgagcaaatgatgctaactgttatttttcaattgggaagtttaattgaaaacaataa  
gttttcatccagaagttatccctggttgggtcagccttgagtaagcataaacaatttgacgctgctcgtcgtatttgaacatgcgaaattgtt  
ttatcgtaaaatacgtgctcgtctgttgagaaggcaaacctggtttatggccttggatttagactcgtatggttattcttctcttttcccgtgattt  
agaggctcagactatgttctgtgagcaaatgaaatctataggctacattcctcagcttccactttgacatctgatcaacaactcaacgaaacgtg  
gagacaccgacgatctaccactcgttgaagatattcagggaaactaaactcataacgttaagccttctgttttcttataatgagttcttct  
aaactaggtcagctcgtcgtaccaccgaatgtcggaaactttccaggaatgaaagaattggttgcctcctactagtgacctatggaaca  
gtcataaatgctgcttccgaattggtgatgaggcttgggtgaaaaatattttgtgaaatggaaaatcaatccaattatcagcctcgggtggcac



cttataataccatgatccagtttgaagtccaaactatgtataatcgggagaaggcattatactattataatcgattgttgcacagacatacaacc  
ttccccatacatataaattgctaattgcatgcttatggtatgcttgaacctgacagttacatcagttgaggcgatacttgaactaatggaacga  
accaatgtaaaggttcttccgatgcattatgctgcctatattcatattcttgattgtgatgctgatgttcaagctgtaaccagtgctatctgtg  
cacttgccaagcacgaagccggggagatccgactagacgcaaatcttttcagtccaaatagaatctttaattgccaacgatcgatcatggag  
agagttcagatcgtttgtgatgaaaaagtaggtgtgtctttaaagccttacattgtaaatgctttaattaagggttttacaaaattggaatgat  
tagtaaagccagatacttttgatcttttggaaatagacggtagtctggcaaagaaccgagtacctacgaaaataggttcgtgcatatttgagc  
gtcaacaacacggaagaagctgccaattgtggaacagctaaagcgaacgcttatccagctccggttgaacagaatttcttcaactgtgaa  
caattatgatgcaaaagcctaagaaaagaacgaatcattacaagtcatttcttgccttgaagtgacaggaattgacaactgtagtc  
gatggcatagagttaacacattttgatacgcaggaatactatttcatgaagttttgttgaatgcttctctgataactagagttataaaagc  
atcattaatattgtgtaaatattttaaacttagacctctcatagacttatagacttatagacaatatagacataattttatgaataacttttagtc  
gtatttcattatattggaaagatcagagtataggaattatattgctgaaagtaaaggtagtttctgtattaccagaataatgtaacagcaaag  
aattaaaggaaagattaaaaataaaattatcattaaaaaaagcgtttaaataaattccacttggaggacttttctattttacattgagggtttt  
gtaaatatttagtgccttgattaaattaagatcaccaaaattctgctgctcatattttagaattatttcaaagctttgaaagcgtttgagtg  
gacgtatggttcaatgatttcatcctcgtcggtttcaaaatcacgatcaggaaggaagtgggccgcaacttgattgaccaacaaccgcttggc  
ttgatttaattcctcaggtggatcgatgaaatttcaaatcggcggtttctgactatcaaaccttgaactgtctgttgaattgagatactaccg  
tgaagtttcagaaggttctggttctgctctagtaacgggccaatacaccagagcgacgaaaataaccagcaatggttagcaggttcaattgat  
attcccaaatgtccaccatccagcgaacagcttgcaaaatgtttacagtgcgtaaaggatttatactttttagttttagtaaaatattataa  
cacgatcgacggaatgaccttgaaggtttgctgatccctgctcgcagttggatgcttgcattttgaggcaataagacaaccaat  
acatttttaaaggatatttgaatttcaatgatttctgctgctgatggtgcttgaactccaacaacaagagaacatttctacctttcatt  
tgggaatcaaaccatcgaagcatttccataatagaactactcatttagctacaccattatgcttccagattatgtttaaattagaggaggaa  
ttttggcagcctgaaaagcttggcttctttagatccaataatccaaaaggcaaccgctcagttcgttggcgttcagcaaatggtaacggt  
tacaatgctttgttgcgttcaacgcctccgatatttttctgataatgcgtttgggagtgagttccagaaaaagagattcatccatgtaa  
aatgtcgttgatggcataactgttttttagctcgtgaatgcgactacatcgcgtgatcgggtgagctccatcatccccgagaatagggggagatt  
aggcagagaaatggaattttgattaagggaaagtagatgtggcagactcaatgaattctgtgatacttgttgaagattgacagaaggcaactct  
gcggcgataatgcgtagatgtggtggtgaagttcttttgggatagcaaggatgtcgttttgaactttctagccagccattactaaaagca  
ggaggtggttattctgataaaaccgtaatttttccataatccatcgcagcatgccgaatagactcactgctcacggataaattttgttttccatt  
cgttgcgccattcagccaacgcatttccaagactggaaactcgcaggtcgcacttactgcaccttattcacaaggtcagatgatccaagt  
aatcataatttgaagataactgtcgatatagttgcttgagatattttttgaaacgtgtcttcaaaccaatcttttattgcttttggccaggctta  
cttcaaattcattgtaaaaattccttattgccttttttctgaaatggtaatcgcttgccttctcactggcggcattttctattgtcttatttaaggctt  
ttataataagaaggcgacccccctgggtgatctttttagagagtcaggttgaacaactcgcattgttacggcgagggtcttttacgcttcgta  
gcgttgaagaaccttgttattattattgttaagtgaactaacgtggaccctactttgactatgccattcatgaaggatagttctcagttttctt  
tattccaatatggttaattgattcattatttcttttaattgcgattgctatctcgaaattcaagcattgaatgcaaccgaccattgttctatc  
gagggggaacagccaatattgtgatctccagcggcagatttaggatagagtgcttaaccatggattagggggaagctgaaaatgaatt  
gagcaagtcagtagtactcaattccttaggcaatgctcagacgggtgatattcttgaacggcgctagaccttccaccgctggttcgtagacc  
cactgactgggatgattgggaaatgggaattcccgtcgcaggaagggtggattttacatatatacactatgaacctcaatcttagg  
gatgcttatgattatgattgcagacagccaagaactggatgcaagttcaggttaatcccaagttgcttaaggatgatccaaaaagtgatag  
gaaggaagaactactcgtaaagatcaagcgtttgataagagaaaagtcggcagagaaaatccgatgcagaacgtcaaaggaagaaatccaa  
catttcaaatgttatagataaccataatactaaagagtgcaatgttattacgttacttaattaagacaaacagaaatatagaatacaaat  
ccaattaacaatgaattggcagatgattaataggtagaagaaagcttttattaaccagagtagattagcatatataatccaactgtttcgagaat  
ggtcagtttaattgacttaattggtgatccatcgccgtttgtcaaccaggcgtattgagacattgtattgaactacaatagtggaataatttcca  
attgactcccgacttgaatgtaaagactattcctatttctttgattacaatcatactttagttatttctcatgacaaaagctagagcgaagg  
aaggatactattaatggccatatacaagcattctgatgcatagtcataatgaagggttcttagacaacttaattgatggaaataacgctt  
tttttaaaaaaagaaaaagagttggttgcgtcttacccttgggttcttactattcatagtcagttttgaaacaactttagtcagccattt  
tgttgttttttttttggaaaattagacaaagaaaatgaaattatataaagaaaataaataaataatgagaaggaaatcacia  
atcactgtgaaactataaagaaactgttaacaagctctttatgatgtcaattccatttcttttcttaattgaaacacaggaaacgagatttcat  
acccttcataaagaaaagaagataatttcttttattcaatggattttcactaaattgtatttcttgaacaaggtgtctgcataccatctcgct  
ggactactaaggaattcaggttacatacgcattgcaactgggttttctactaggcgttcgtaacaaccaataaaaagaatgcaaatcaac  
agattctacgaaagataaacttattttgacctaactcgctatcaataactcaagtaagcttccataaggaggaattggagggttaaggacctt

actcgtgttaatgactggtccatgaagctaccgaagaccggctattcaatccagaaagtagtactttgtcttcggctcgtcttctctggaa  
gagctctcccgttggctctgctgaaggaactggaccgtagaggtttattatattaccaactgggaacatcgaaaaagcagaagactgga  
aacaatccttatgcctctctatcgttttggggagtccttacaacgccaagtaagagttgaggggatgatcgacgtctcagccgcgaggaa  
actgaagagtacttcaaactcgccctgcctatctcgtataggtgcatgggcttccctcaaagtagtgcattcagaaccgtaaagaattgga  
gaacgcgttcaatcatacaaagaaaagtttgggaagatgagcctggttcatactgctcctgagtttggggggtggtcattcgatcgatcttag  
aaattgaatttggcaaggtggcagtagccttcacgaccgcttctccttctcgcagatgatttggaaagcaactaccagttggttcgttagcc  
ccttgatttttatcctttacatttgcctttgcctttgttgttttataaaaagctaattacagcagaaacaatatttcttttcttctgaggaaat  
gtgatgaatccttcaaaaatcagataaccgcttggcctttactaattaagtcctacaaaaactaggtattatgacaagtcatattaatattc  
aaaaagctttttcttattctgtatacttctcaagagaatttggccaacaaatttcaaacatttttttttttttttaaaaccacttggtttctaaa  
gctacaagaaaagcgccaaaaagtcttcaagcatttcaattaactgaaatttttcatatcttttaacataactttgttgaacttacaataaaa  
tatactcagttgcatctacaattgcagctttagaaaaaggcagcttgggtttataaaagtggaacgaaggaacgtgctacttgcagttgtagcta  
agggttgttctgctactccaaaaccgttaccttgaagagaagtatcatttgtttgtttacggtggaagatgggataaaaaatcataaattatgaa  
gaatacactcgttatagattatctatagagaattgaaaggtaaaggaagtagcttccagttatttgaagctgtataatcaaaaaattgacat  
atcatgatataaggttagcacataaagggtcattgaggatctatttccgtaaggaagaaaaccgtgacagggaaaaatgggcattggaa  
acctcttacttactaaaagtattcatggagtcttcagacaatcgtttcagagactgcatataaaattatggattgagttgcatgcccctgttc  
atccgtaagtaaacctgaatttccgagaaatattaagtcaaggaagaaataaaaagtttttaccactgatggcgtaccaagaagttaagaaag  
acgccggaagacgtatacagtaatcaattctaggtatcgtgacctatggaacaataaataactcaaaaccaaagtctagtaatcggaaac  
atccaattaggaatggctcttccacatttggtttcaaattgtttcaagtcatttttctcgaaaagatagtagaaagcttactgtatcaagttta  
agtaaacacttataaaccaacaataaaaagttgctaaaatgaatcatgctcatttcttgaaggaatcattccaatgttaaatga  
atgttataaagtactcagaacagttgggtcaaactattcatatagcctttaaatacaaccaagtgacctatttctcctcgataagacttttg  
aatgagacaaaataaaccaaaattgagctagagaataaaagaaaataactctgaattcgaactgcataatcttaccattaccaacaatgcttac  
aagaaacataacgggttaccttgaaccatttgaatgtgaatacttccatgaaacatgctggaatgcaaaattgcaaacatgaattgagatat  
gtacatatgggattcagctcctcaaacccccatagtttccctgtttaaactcttccatatagaataaataagagaattcctttcatatttttaaaacg  
gttccctcatctagggaaactgcaatggtagtcagtttccatctataaaacgatcagatgtttcactttaaataactgtatcattatattagta  
gaagcctgagcaacaattgacaaatcgtacatcagtaggttttcaataaaaaagaaattatacaagaaggtataacctctttttatgat  
attataaataactaataagaaaaatcccataatactcaaaaagcattcattatgcttgttttaaccctaaccttaagagcgaggaaatga  
attagaagttaccctttaccaaccatactaggctgaaaaaaagtcaaaaaggagaattggggccagacaagcggataaatcaagagtttctg  
aatacgcattcacaaaagatttcttctatccgtctgcttactgataaaaaatcaagggatttagggccaaacgaagtttgaacctaaaaaa  
tttgattttagctgtgcttattgattcacagattttcgaactcaatacttcaaaagtttgcatttctgagaataaaaggtttttctattggaatt  
aagagcaattgctattgtacaaaacaagaaggatcagtttcttactttaaagataaacaatagtgatcagtagcctgctattactgaaaga  
acctttcgtagtgagtcgttgcgtacgacggaattacttggcctgtaatgcaatcaattctgtgacgagtggttctgctgaccattctcgtc  
aggcgggttggtgaggcgttcaacgtatgattactgaactgagcatacttctcatgttcaaggagagccttctgctgctgcttcttcttagcc  
gacttgcagctgtgtagcccaattggttgcctgacatacaaaagctccctagagttcagccttctacgcctcaagtgtaactctgatccccatgt  
cttagcttggtaagaagtttggtagcttgcactgctcctcaaaaggcgaaattgagcaagtaataaactgggcttctccggaaaaaggt  
tgtctatgtaaaccttgaagcttacttataatcgttactcggcttcaaaaggaattgatttaactttgacaatgcagatgaactttaca  
aagtaagcaacaccatccaacgctctgtttattgcttgcatactactgacgattctggcagcttctgctgctgagcctgaaatttgggtcgtca  
ctagaagatactggctcttactcgatttagccaagtcgttgaattgaaatgtagtaggtgtcagcttccagttgggtccggtagctatgactcatc  
ggcgttcttagatgctattcgtgatctcgttctgtttagcaaggtctcagatcagggttctcatttgccttgcatttggcgggtttttcta  
gtgattcctttagctcgggtccgatctagtcgtcctgctttagatacctactttgacctccgttccgctcatctccagaccggctgttcttgtt  
gcaggtgctttacgttggctgtgaatgtgatagctaaagcgtacgtcaggaagaaaggtgatgtattatgtgaatgatggtgtttatgga  
agcttaaattgcatcttattgatcaccagcatcctgttccccgcttctaaagaaaggaagtcaattccttataacactcatttgagtactggtaa  
tcaccgttgcctatggggacctacttgcgactcattggatgctattgcctctgatgctgcttaccctatgagttaaatgttgggtgattgattta  
ttttgatgatgctggtcctacaccgtagctgctgacagttttaaagcttagccttatagatatctgaaaccgataccttgattg  
aagtattcttagttgcatcgggtttatgagcgtcagtgctataattattattgttattacctcctcttcttcttttagcgaactattcatgtt  
taatgtgggggattttgtttatgaagaggagttactttttctaaattgaaatattattgctattgtgattaaacattttagttgtaaaaaattg  
aattttgatagtttggagaagatcatctgggtttcaagtttgaagtagtataaacacagtataattattggaattacaacaagtaaatagta  
ctaaaaatctttcttaaagctgtataaagctatcaggaatattgctttgctatatatatcagggaccgacttttccattgaaatggaaaaccat  
agcaaggattcagaactcccacatgaattgcaatagatctctcatggctcaagaaatgaagcataattacattataatttgaatatgagagtt



atatctgtttcttttcttctttttatTTTTgtttgtttgttagagcttcacagtgtttctaagagcccttgcgcgactaactagaaaaga  
gtatgtgtaaataaacacttgacatggtaacataacttataaggctcagagaaagctcttttatgagctaaattgtagtaaaaagcctcattat  
ttctcaaacgatagaacgaactgaattgataatggtttcgctttcaggtttgttacatttggaaccaagtaaacaatacagaaaaaatgaaaa  
aaaacacagttataagaaggaattaatacataagttaacttttctattcaaaaatgaattaataaactaatTTTTaatgtagctcgtttctatat  
gactctgctttggttgtttatatcagatatcaaatgtaaacataaccattcatctccatttcaaactcttggggaattcaacaaaagcatcact  
ttcttaataatattgtaattatcatgcatagttttgtacctcagacgtatatgaaactcgttttcaactccatcctgatttagacgaaagagattg  
cttagcagttcaagccatggcaaatagtttctgtctggagacaaaagaaaattcaactgaaatttattacaatcaacattccatgaagaaaa  
ccctgctcgttgtagatatactgaaacgtcgtttcgaatcaaaaagcccatgttcaacacatcaaaaacaaaaatgaaaccagctcgc  
gcacataaagtctgttattctcaaacagtcataatctcttaggagcaatgcctaagtctccctcagatggtaacaaaatcctacattcccgtcctc  
tctcttgatcatcatcttttctccataatctccataatcatgactgtacctcattcttttggagaagactctattttcataattccttctgctcactg  
tatataccatatcgtgtagttcatttctcttttctctaatttattctcattgtttgtctcttattcttttttaggcataattctctatattttcttctt  
tttttcttcaataatactcttttcttcttccgattgccaatttctactacatttctgttctgacttctgaaagcttatacctttcctacatattca  
actgtagactaccagctcctaaattcttttctaccggcctcaatatgtcaaaaagagagctaaatctgattagaaaagctaatcagttcca  
aaaagatcccaatcgcgaagaacagggctatttcaaacagaaacgacttgcaaaaaaggaacgtgcttttgaactgaaaaaatcgttctggaa  
gagaaatggaaacaagaacaaaaaatcagaaattcttaaatatctaaagagaactatgagagttgaggatgccgaaaaagccgttcatgat  
atggtaagtccgttttccaactgaaaagaaaagagaccagaaggactaacaacattttccgttagatatcaaaaagaatgagtcgaataa  
aaagagaaaaagaaaacaaaagaagaagaatgacgacgattatgggttttgaagaggacggccttctatagtcaccttttctgctgctt  
gatattgatattgattttcttttcttttctatatacaaatcttttttattataatcaggtaaatgggttatttaggaatatcatttctacataaa  
tgtttctacgtctttctgtaaatccgtaaaaaagcagttctgtaagtagccaggaacatgtaaaacaaaaaattaaaacaaagaaaagctgtaa  
aagacatatagtcagctgtttctgtagctcattgttaacatctactgtccttatcgttggtttactcaacactactggttatttcatgttctgga  
agatttggaaattcatacaaagtaacctactagttattagagaaggagtagagatagaagagaattcaatcgttcagtgaaaccatttctcaaa  
ttcgttgcaacaaattatttttagtgtgataaaggaacgttaaggttcagatgacgactagcatagcagagaaattgtcatgaacgttgaact  
taagcattgaaagcaagagaaagaccagcctgtgagcaggtgtcctaaacgttgggtatcgagttgagaccaagaccaacagtaacgcca  
ggacgaatggctggaagtaagacatggtagcaataccagcgttgtaattctgtcttgcaaaaggtatccttatccaattggtagcttgaagcg  
agctctaaggtgatggcgttggcagtggaagaagcatccaggtaacattaccaccagcctcggcttgagagctaacgcggtgatagtagtag  
cgcggaagcactaaggttgttgaagcttcaagactaaagagaaggggtagcctggtaaccaatagtagcggcacttagagacacttcc  
ctttggacatcatagccgaattcagcaccagcaaggaaaccctcgtggccaacggtagaagtaccaaggaacttacgttccaagcattaaca  
gaggcatggctgtggatcaaaggatgttcatgctcaaatgagaatggcagcttatcagcagtagcagggctgaaagtggtttaaactggc  
atgaagaccttgagcaaatgattgtaaggcaatctggactcaaaacgttggcagttgtccaacttgagacatggtaaacatttagcctt  
gtcggagaagttggttccaatttccggcgatgataccctggcatcttgattaccggagcgttgaacacaccattaggagcgggtgtagc  
aacctcaaaagagtagctccaatgggaaaatcacgattcaataatcgttgcaaacctgtcagatagaggcgaagcaggaggagccatggt  
aattaacagttactaaatcagcgttaatacttttgttactaaccaacaaccaactaaattcaatattatccatctcgtctacttcaactaca  
tacttacttttaagacaaaaggaaccttgggtggttctggtgtgatgtaaagggcaagtttagaaacccccagtaggacctttcatattcgt  
atcctcacctcgttgacattcataaacagttacggaaccgcattcgcgttgaactgctttataacggatagctatctatccgtaattcttgat  
ttcatttcatgccaatcggagtgcttctgtctcagccaggaataataaaaaaaatataaatatacaaaaggatgctataagttgggtttatt  
aaaattgtattaagtaaatatgccatacatatataaataagtacaaatattccatccacattgtttggttgaactcatggtggaata  
agccaagtttttggctgagctatataggttctgtgttacgagttagtgaaactatcatcgttacttagttcgtttactattatctctatcatatt  
tgatttctgttactgccacggtaggaacctcactatgaggatgtttagcagtggaataataattacaattataggattgatgtttcaattgg  
acaaaatggaataacgtagaagcatagtaaacgttcagaaatttgactaactaaatgaactgtctaaaagtcgactttattatcctgaacagt  
tgaactttcaatctgaaaattcagactgtaaacacagatatgtatatttctaaagattagccatcatgacttgcttttttaattaataagaata  
atcattgcaaagtaaatTTAATaggagttttgtattagaaccagaatttataatctcaattttctgttactattacaagaagacaatcctttaa  
cttatgaatataaagatattcgctaatttccattcttataacaggttgttatataatgaatgctaacgaggtatccaattgtgacctccttgggt  
caggtaacgactgaaacattctacgcttacaattatgtatgtatacaaaagccaaatcgctaattgtagtaagttgaaagatgcaattggtaa  
tacgttgtatttgaagccagtttaagtaaaagtgttaggaaaaaacgcatgacactatgcgtgtgacattttcgtactgttcgagccgtgg  
ctcaatctcattgttaaccttctcgtctattgataaaggaatgggctctgagggctgtaagtagcaaatcaaccagattaggcaaaagagagtc  
tgcaaatcctggccctctacacatatttctgtaacgtttgtttatcgtgtcaatatgaataggcgaagtccatcgtcgtttacgacaccagc  
aagttcattgttactactaaatcaaaccttatctgcaactcctcaggtatagtttgggtacctaacatctcaagaagcttaccttagtaagagtac  
tttccgctggctgttttctaccaccagattgtccatatagagcttctatgtttcatccattgctacagcagaagaactaggactaatataact

attcctatagaacaaatagcaaccataacatcagtagctttggttatatctggtgactgataatcgtaaacattgaaaagcaaagcttcataaa  
accaacatatataggaagaatgaatgaaagtaatacaaaaggttaagtttagatttaacataataatgacacatgtacgatgctcatatttctac  
tagcacagataattcatagacaatccaaggcatagtaatagacttttatagctaaagtaatattgagcctctaaataacgataaatactaaaag  
cttctataaaaacgtcactcaccaaaaataaaagtgtaaagtactgttaaaataatgtatgggatattaatttaaacctttataactttttgt  
aaccagatcatgtatgcagaaaatgatctttaaaggaaacatctcagggtcatgctcatcataatatacaccttaaccgctttcactgcttita  
gtaattgcttcatcttcaatgtcatgctggtgtcttcatcggaagtcttcaataagttgatgacattgagtgagtaagaattgaccaattcc  
tggcctcaggaaccgaattatctgatgccaaaaagatccattgaccgtagttttcaagcgaagccaattcatctgataagggtacaaatct  
ctttccgagtaaatctccactctttgtacctccagtaagcaacgttttacagtagcagctggttggacagccataagctcctcagaaacgg  
gttactggcagataacagttggtaatatatgcataacaacgtcttaaaaataaagcaaaatctaagttttgtagaaactcaciaaactggg  
aaaaagtttaacatactcttgaccagcaggtgcattaccatttcatccaagaattgaccatcgattcgcatagagatcaattcagccaatgagg  
ctctgtaaacatacaactgtatatacggtaaacacttctttagatgatagtaacttacttactcggttctttagcgtccagcgtatgtcag  
tgtgaggtgttttagttacttaaaagctcatcaagcagactgtagattgtgaaattcgggctgctttcatctcatccgtcagcccttgccttgat  
tttgatcttcaaaaagctaaagcattcttcaaaaacggtgcataattctgtccctgtaaaggccggtctggtcgtcaacgaactggccatc  
gggatctgcatttctcaatctcctcagctgtttcatcaaatggtaaaactctcatccgacgttggcgaacagcaaagccgtcaattggc  
gacgaattgacaccaaccgacttgaattgaagtaagctctgggcaatcttgagatattgcttgcgcttgcctatagttttgtcacactgttcca  
gtttgttcttatataatcaacgacagagagaagcgtcttcttctgagcacccttaatacagcagccgatttctccaatcgctcttcagag  
gttttaaatcattttgagtataacaagctccttcaaaactgtattccaataatcgctcactgtgccgagttgcacaaagaatgcaggaaggtcatt  
attccgaccaattgcagataaaagagtgacagcaaatgtagacaatccttaattgagatccacaatattacgaatattatcagatgaccttct  
tttgcaattaattcactaaagcgttaatgagctgttaagtgacattgggagcaattctgtttattcctttaaagctcctgtaaaacttaccattgt  
tccactaattgattatagatataaaaacatcgttctgtcaatgtattgtgtacgatctcgtttaacactgctaaccgctgacgaattccaatgag  
cttctcaaaaattgggtgcttccactggacaggaactgctggtttataagacatgttataactaatttttctattaacagttaaaaattccttaa  
agttgtgtattctggaaatcagggaggcaaatcgtagctgttgtaaggacatgttcgaagctgtaagcttgccttactgaacccttatc  
gaaatcgagttaggaatctagacaattacgaactcgtataaattaagtagctaataattacatttaataacggctcttcaaggaaaattgtct  
cattaaaagatcagagcatccaagccttaacaaaatataatgtattcattgattatgtaaaaagaaaagtgaaactataaaacagagaggtc  
ttatgatctttgatatactgatagaaaattaaacataagcaaaaagtaatgagtaaaatcagtcgcataaaaagaatgaatgatccaaa  
atctaagtagcttgcactggagtaacagtttagcataaacattcattaacattgaacgtcggcttattaatatagtcctaatagtctttcaggt  
cgccagtcaatgctacattaacaaattcatcatccacataagtagatcgtataaaagataagaacgtttgagggaaataaaaacatccatgatca  
acgttgaacgaagtcattattgattcacggaacactttgaagttgattcgtaaaacaaatcttaccctcctagaaacattcatccataacag  
gaaattcacagagttcataacactgtatattacattcgtcgtatgttgcaactgcaatccgcaatataagtagtagtatcttcttttaggtgta  
aattagctcaacatgtttgtcaatgtacttgcaaaaaactctctgtttggaataatgtagctatccaacgggtccgctgtaaatacaaaaca  
ggatgtaaggcaccacaaaaaccgctgagacactgaaggaccaattaggaacagcagcttctggtgaatcacgatgaaagtaacata  
ggtaggtcaacctgaagcattccgttaggtacaagcctggtcttaggtaaaccttcaaggcttcttatttgcataaaaatttcaaatattccag  
gcctgcataactatcagatccaaaagtgaaagcgggtggaattggcgaaaaactccgaaaggattttgatttctaggaatagagcttggactag  
caccgcaactatccggacaagttggcgagctttgataactcctcataaattaaagcctcaagaactcctagatagttgctgaacgatggctt  
gctgattgacccgtgatttgatgacctagatagatcggatatacaattgcttgtgatgaattcgaacatttgatgaggaataaacgtcttcaaagttt  
tttaggaatgatttgagtagttggtgaactttgagatgaaagcatccggatgaagggaagtagattcggttcaacatatacagacga  
actagctaataagagcgtaggaggggagtaagatgtacaaaagcgtctggcaataggagcacgggaagactggatcataatcttaaatgg  
tgtttctcattttttgtcggctcatcttcatagcaagggtgagtagtgaagaaatgaacctaggaaaaagttagtaaatgaagtaaatgaa  
ccgtgaaacttactttttgcttctatttctgcatgaatccttaagatcttgatattctcatccacgtattgctggaataactgaaggtgtatt  
aacggagctaataaccagcttttaaaattcttagacattgttgattttcataatgatattttcatcattttgaagtaataagcccaaagccgac  
ttttgaagaagtgattgtataagaggaattgctttcattggaattcgaagaattggacagggaaacgcataaaaagctcccggatagattatc  
tatttcagtttttagagtttctgtagcattagagaataaggaccaataaaatgtaagaggatgaactgagtttcaaacgtaattgggatagttatg  
attagggtcaaaagcataggttgaaggcctggtcgggtttcagaaaacagaaatgggtgataacttgcattttgctcattaaagctagaagtaga  
aaggttagatagagggaggtctattttccggcgacggcgacatactcctcattagattaccgtttctttattaatgggaaaagaagtaccatttaatt  
tcttgtgctgaaaaagaatttaatactgtgtctgtacagaagcacttgaatgggaaacccttataggtgagctagatctagggtataaggaa  
tcaaacgcgaggatcggtgtctctatgtgaaggtcgaatgcttaaaagcttttccatttgcctatgcaacaaggaagatgatggagcatcag  
ttagattagatttcttttaagaattttgtttccttcaaaactcttctgctttgttctggtgatacggaaaccctttcaccatacgggtgaccta  
aactaggttctgcagctgtgaccgccttagccgaatcttgatctttgaggtgatacgtcagaatcagtttcttctgcttattcactttttgctc

gctgaaactgtgtctccatagccatttcgttcctgagtttcaaccgggtccacacatgttaatctgaaaaagctgagttagcatabattcccag  
tagcagggggaaggagactgcaaggtatgcagctttgtaactgtgtttttgagacattggaattgaccaaacatcaaatcagtcaaaaggcga  
tgagatgaatctgaaagctgcgtttcttggccttcattattagaatgtttaaatcaataaaactgtttcttgcgatcgcaaatatctgtacaagc  
acaaaacgaaacgataatcttggattcttggctgggttttttaaccatggagaagctcataaagactcctttgaggaggaatagtagcagag  
gatgagcctgaatgaaatagaaaatgaagcattaaatgcacattacgactaagattatatgtcaatgtagaagtggtatactccagaaatct  
taagagttttcaacaaataatgtaataatcttaaactttatccaaaaaacttaatttttcagataccagatttataattatcattcctc  
actagtagtttctttgtgtggtgaacccatattcagttcacagtagaagaaatgtgtatgtgacttttaagagaaccaagctttggtatggtttata  
aaacacaataattaatgctttgagcgattgatagcaattagttgtttctgaattgtataacagaagctgacgaactttgacataagacatgca  
cgagatattgagcttagtttggaggaagcaatcttactacacattttggaacacacaagaagcatattttgttacgatgaacgagat  
gtctcaaaagtatcggtgaatacaaaatctcgcagttaacgaaacataatgatgacatttggcaactgtcccaagggatgcgtttacgactct  
cctaagtagtttggcttctgtaaaaggccttgggttgactgactgactagaagtagttagttctcaatcgctggttacttgagaaaatcc  
acaaagcacctcttgacattcatccttatcagagtgccttgggaacaggatgaatggtacattctcaaagtctgatgtattgaaggatcttga  
acagtttcttcttacacatattgaaactggaactgtaaagcattggtcagatttaaatagattgctattcgatctaaatacttatttctataaa  
tttccctgattgaattctgaaagctcatcattgaaactggagcggaagcttctgattgatacaacgagcataatgtttgggatgaaacattac  
gcccttatttggagagtgtagcgaatgcaaggattcaatgtcagttgatgaaatactggtggtctgggttatgaccaattattacaatat  
atgaagatgaaactacaggatgacggtttaccagtgtgggttttggtgtaaaaaatagagtggtctatcagtaagttcattaccaaatcaaaaa  
caaaaacagatgatgcgaatgaatcgttagtactagggagccttaaagatgtagtttcttatacacctttaccttttaagccagaacatgatt  
actggtttgcagttctatcaaaatagcgtttgaaacttggcgtcacaacgcggtttgatgtaactttacatatttgcacatgagtgatttagaat  
actattaaaataagcagcggtcgtttctattttgactcgaccaaaggcaaaatctcacgagaagagcgattggaatataaatcgaaggttt  
cattcctactgaatcacctttctttcagatctttccagagcacccacagtaatacagggcccaataaccaagatgctattttgagcaatctt  
cctcctcacagcctaaaccaagatataatcaatataaaaagatgggattcccaatgctagacactacactgacgatttatcaaatattgatata  
gttatggtaactgcttctcaacagagaaggcaacctcactgtacaatcgattggaagatataatgaatactcgacaatttgcagaattgaccag  
gatgatgtattagagttacaggaaaactacaatcttactattcataaatggttcaaaacaagtctctgcaaaaaatcagatataaaaggtattatt  
gtactaagaagcggtttttcaagtctcgaatgaagaatgtagtcaagaattgtcgagtaatccaatagatataaataagcacaacctgcttaccgta  
ctacttttattctgtaaagctttattgttcttgacaagagacataacctgctataatattgtcagcgcaatactaggaattatagatgaatcag  
tcaatggtagtttccaaaaactgtatccagacttacaataaaagcaaggtaaaaaatgaccaaggcaaaagagagccttcataaaaagtg  
accggttatggcgactactgacgaatattccgtggcatccaaaacatgagttttctgaataattgattcacatgaaaaacgacaagtgtt  
aaatattgagcaccaagatccatttccctgcaagcaaaaaagaagatgacgcttagtgcaagatcttgaactatataaaattcagt  
ttgttatagagtgattgattatgtatgaccatttccaaatccttatacacacattagtaactgcctaaacaatgcttgaagattcaaatca  
tacctgaacataattataaaaatagattgcatcaaatggttgcacctagcctagccatgttagaaaaatgatttttagatttagtagtgac  
acacaataaaactgcaatatacgagaagaacaaacgaaatcatttcttttgatattgctcttttttttggaaatgaacgaacaaggccttatag  
cttttggttacagttgtggtgaaaaatgaagtgccttacgaacctttatagaaagtcacatagcataaacagactaaaagctacaaaaaagatc  
taacagaagctattttactcaaaatgtaataaatttaaactcattaggactttgaaaaatacaagtcgattgactatgaaatagcttacaatg  
aaaagaccttatgcaaacgctacagttcggttgacgactatattttcttttatataaacaagaaggtgaaagccaaaattataaccaaaataat  
ctagttccttcaatataatctaaaagaaaaatgtttcttaactcagactaccattgacctggtttagccttgacagaaccaaagctccttctta  
ccttgaaaaataactgtgaagtcttggctatccttgaacccgcaaaagtaaatcttaccactagagaaggcaggttgaatgatttccagatt  
tacgcttgggattcaattgggattcaggtcagattgtcaaagcctcaaaaggcaagacgatcaccggcctcagcccctcaggtggaagcaca  
aactcaaacagatttgtcaggagaagaagcacaagaacatggccttgactgacactacgcaatggcagggctttaaattggcaacta  
caaaccttaccgctgattgtccaaaggaatatacttgacaaaaccactgcaaacagtacgaggaccttcggcatcacacagtgaaata  
gtagaaacatacaagctatcagcattagggtgcttgacggtttctgatgaaaccaacacgaagatcaatcatagaaggagtaggaaactcaa  
ccttaggagcttcttagaggcttatcttcttttctttttatcgctcttcttttcttctttttagcagctcgtatcggcagtagaa  
ggcttctgtagccttctcctttccattttgtttttttcaccctgctccttcttcttcttctcttcttcttcttagcgatagtagggcgttgaatctt  
aggagcgttcaaatcaaaagcaaccaactcaaacgagaccttggcagtttcataacagcctcctgatgttgataaaatcaaaccaacga  
gcaacattattcaatttagcccttggcggatagttcagaaacgacaggtatgaagatgaacatacatggcaaggtcagcgagcgtatacc  
agcatcttgacgataaaagtgttattcattaaggattcattgagtgactcaaaatcttgagagttgagatgaaaaagccttggttgctcat  
tcgaagactgtgcttttcaaaatcgttagatcctaacaactctggcttttctcagatgcagctttaaataaagcatttacaggagcttcttctc  
tcttgacagaagcatttaatacttggaaacaaatctcagcctcgtatgacattttgctagaaaaagtgatgctggtggtgaaagaaaagactgtatc  
ctagtaggtctaaacctaaggagggtctgtaaatgatctgaagcaattcatgagcggaattcctaagaaatatacaagttttcttttgagttt

caaatTTTTGTTTTGCGTTTTCTTTCTGAAGCATTGCATATCCGGTAACAAGTATATGCGCTGAATTGATATGCTTCCCCCTAATTATAAGAAAAAG  
TTCTATTGTATAATAGGTTTTTACGAAAAAGAAAAGTATAGTGGTTGAATTAATATTAGGATTGCGTGAAACGGATTTAATTTACTGTGCAATTGT  
CTCAAGGAATCGCATGCTATGTACATAATCTTTTTATATACTGTACTATAATCATTTCATAGAGTATTATATTGTCGGAACCGAATGTAACCAC  
ATTCGTATGATTATGATAGAGAGCTGGATATTAGGAGGCTTCTGTCGATGGTAGGTATGGAGACAAGTTAGCCAAGAGCGCTGATGTACAAAA  
AAGAGTTTCATATGAGATATTTGGTACCACCATTTGATGTATCGACAATCACGTCACAGGTTTCATCTGGAAGACAACGATGCCACTTTGATGT  
AAAGCTTCAAAACATCAATAAATGCTTGTCTACTCGCCGAGCTATGAGAGCGAATAACAGAGCTTATGGACTCTTTTTCCGACTCTTAT  
AGATAAACGGACAGGGTTACCAGTGAATGCAAGGTTGGGTATCGAAACGGTTTTGTGTTAGGCTTTCTATAAAGGAAAATAACCAATCCTTGG  
AATAACAATACATATTATATAATTTGATCTTGTCTAGCTTTCGTGTCGACCGAATTTTGCATTCTCAGGACTGATCTTTAGTTAGCCAAGTTTCT  
ATAGGCAAAGGGTTTACTTTTTACTTCTTAGATTGAAGGCACATATTAACCAAAGGTTTGAATACCCGATTGAAAACCTGCTTCGACATGAAAG  
AAAGAAATGAAGGACTCGTTATGCGTGAACAGCCATTCAAAAATGTTTTGCCTATAATTACCCTATACCTGTTTTTGAACAATTTGAATC  
TTAGAAAAATTTTCAACTACAAAGTAGAGAAATGGCTTGTCTAGCTTCTATTGTATGAATCCTTGACGAAAAGAAAATTTCAAGTTTCAGC  
ACGTAAGCTGAATGCATCAAGAAGGAGCTATTTCAATATTCGTAATGCTGCTTGAACCAAGATAATTTTGTAGCATTGCTTGTGCAATTTT  
TCTATTCTTTTATGCCAGGATGAGAAACCTACTTTATGTTAAGATCAACTACTGAGATTTACAATAATTAACACAAATAGGGAAGACTATC  
AATAAAAAACAAGACTCTTGTTCATTGCTAAAGAAAAAATAAACAATTTGATGATGCTTGTGCAATTTTGAAGACTACTTTGGTAAATG  
AAAAAAAATAAAAAACGCATTACCCGTTCCGGGGTTCTTTCAAGTACATACTTTGTAACCTGGTAAACAATAACAGCTTATGAAGAGACTTT  
AGGAATATAAGCGTATTCATTTACCAGATTTTCACTTCCACATATCAAGAGCAACAGCGCAAGATTCGGCAACAACAGCAACATTATCCTT  
TGAAAACTTTCAAAACAGGAAGACATTCAGTAGCAATCCACCAATGCCTCTGCAGCCTCGTGTGCAACCATATCCACTTCTCAGTGT  
CCAACACTTGATGAGAGCAGGAACAGAATAGGGATCAACCTTTGACCGAAGACGAAAGCAATTTGATGACGGAACAAATCAGAAGGATCAT  
TAAATCCTTCGACTAAAGCAGTAATAGCTTCTTGTACCAATATTGCGCAATCGAAACATGGCACGGTAAACAGAGAAAGATTTGGT  
CAACTAGTTCAGATTCAGTGTCTTCTTTTATAATATCGTTTGAAGAAATCAGGCATAGGAGGAGCAGGATCGACGATGTTGTCGATCATGCTT  
GGGGTAATCTTCTGTTATTCTGTGAGACCATTCTCCACTGAATACGGGCAATGGACAATCACAAGTTTCACGAATAGGCGCTAAAGGATCAT  
TTTTGTAGTACTTTCAATACAGGCAAACTCTGGTAAAGCAAGACACCAATGCTTCAGCAGCTTCTGACGAACCATGACTTGTGTTGTC  
ATCTTCGACAATTTAGTCAAGGGTCTATCGCATATTCTGACCGGATTTGCTTAAAACATAAGCCATCTCGTCTTCAATAATCAGACTCATCTCC  
AAAAGCGTTATAAACCGCATCAATAGCGCGCTTGTCTCTTTTGTAGCCAAAGCATTCAAACGAAACAGGACGATAGCGGAAAGGTAATCGC  
TTTTCCATCCTGTTGACGAGAACACGTTCAAGTTCATCAATCATTGATCTGCTGTTCCGACGACATGGTAAAAAATCCTCCTAAAAT  
AAAAAATCTCGTAATATACAAATCTAGTCTATAACCAACCTAAAACCTGAATAAATAAGATTGAAGAAGCGCTTCTCAAAAATTTTCAA  
GTTCTTCTTGTTCATAAATTACAAGAGTTTTCTTTAAGAAATCTATTATCAAATTTATTTAATCTTTTTTTGAAATTTTGAAGCAAT  
TTCAAACAAGCACTCTTTTAGTGCCTGGTGAAGAGACAAGTGTCTTCAAACAGTGATTTTGAATTTATACCATACCTAACCTCATTCTTCCA  
ATGAACAAAAGTATTATTAACCAACCGCCTTTTTCTGAAAAATGAAAAGAAATTTATTTTTTGTAGGAACGGGAATATCCTAATGAATCC  
AAACTTGTGATTTGTTGTTCTTCTGTATAATAGGACTGTGAGGGTGTCTTCAATCTTGGATATATGAAAGTTATGTTTTCTTTTCTTCT  
TTATTTAAAGAAATGAGAAAGGTATACGCAAAACGAAACCGGAGGGATTTAACTGTTATTTAATGAACAAAAGGCTTCACTCAGACTGT  
TAAAGAAAACCTGTTGATTGATGATTAAATTAATAGATGTACCATTGGATTTGAACTTCTTTTAAAGAGCTTATAAACCGAGTCTTGA  
ACCTGATTTCTTCCATTATGATGCGTATTGAGAAATGAAGATCAGTAAGAAACATAATTTGTGTTGAAATCGAATCGCTTCTTCTCAGATTGG  
TTCTCGCTTCTTGTCTCCAGTTCTTGTCTTCTTCTGTTGATGAGGCCATTGCTTCCATATAAGAGTTTACGTTCTATTCTCGCATATTACATT  
CATTTTTGTTGTTCTTTTTGTTTTTCAATTTTCTTGTATGACAGTTCCTTAGAGCGAACGCTATAGTCAGCTCAAACCTAGACATATCAAC  
TACAAAGGCTGGTCTCTAATATTCTGGATTATTGAAACAAGTTATTAGTATTCTGTTCTTTAGATCAGGAATTAACGCTTGTGAAATTTGAA  
ATGTGAGGAGTTACAGATGCTTTCGCTGCTTTTGAAGATTGACAGCAGCTATATCTATACTATTGGCGTTATTGTTCCAGACTTCAACATC  
GATCCAAAAGACTTATATTAGACAAGTGGATGTTCTGATTGAGTACAATTATACAGTAACATCAGATTGTGATTTGTGCTGCTGTTTTGAAACA  
AACAAAATTTGATAGCTGACGGCTATTACAAAAGCAATGGTTTTGCTCACCTGCCTTGTCTGCTGCAAAATGACAATCCTTTCGATTCCTC  
TATTAACACTGTGCATAGCTACGTGAAATATGCTTAGAGCCTTTTCTGAATTTGCAAGAGACTCCCGAAAAGACATCTGGTACTTTACCA  
AACTATAATTTACAGCTAAGTAAACAAAAGAGGTTTTTCTGAGCTGAGCTATCCTTCCAATCTCAATCTGATCGTTCACTTCTAATGTGAC  
ACTATACATACCTGTTATAAGGATGCTATACATTGGTCAAAGATTGAAAATACAGAGATCTCTGTCCAATGCATTCCTCATAATACCTTTCA  
AACCCGAAATTTCTAAATCGTAAATATAACTGTTCACTTGGATGAAAAGCATAAACCGACTGTAGAACTTCTCAAACGAAAAACAGGGG  
TCAACTCACAGGAAATAGGTTTTGGCATACTTGTGCTATCGTATAATGAAGTTTCAAACAATTAACAAGCTTACCAGTGAAGTCACTTTGG  
AGGTGTTGAATTTGTAAGCTTTTACATAACTGCTTTTTTAAATAACAAAACCTTACGCAAGCAATCGGATACAGCGAACAGAATTGCCGG  
GTTTTAATGATATTCTTACTTCTATTACGGTGCATCATCTGATTCTTACATGAATCCATCGTCCATACATGTGACTTCTGAAGAGA  
TGGAAAAGTCTGTTATCCTTGTGCGTACTATCACTTCTGAACTGCTTGGGATGATTTGATCGAAACTTATAGAAATTAAGCTCTAAA  
CAAATAATGGCAATGCTTTGACAGACTTCAAGATAACTTCAATGCTTTAAATACCTAACGACTGGGACTCAAGTATCAAGGAATCTTACT

tttagtaaagcataccctctctaaaagaaaagaagtctacgaagttgccggcttaaatgaaagacaaaaactgttatcgaaaagactacagtcta  
tactattaataagagagactcacgaaaatthaaccgtgacaatthcatccctttcatcttctgatcaggatggcgagggtcttttgaagcagttcc  
ggctctgagttttctcgtctctcgtatcttccaaaacgttgatgtttggattgactgaagatggtagaaggaaaggatttgcagatgcaaa  
atthggatgatactttgtcaatcgacaatgaattgtttctttataaaggaaaaatthcggcttgcgaaaatactaccagatgatctcaattht  
ttaaattataacactttgcttgcgtccgaaagttcgaaatgctgttcgcaataccaagtacagcttataaacggagtaagccaagatgtgatg  
agcttaaagtctgthttaccgatgttacatccgatttagagcttttctatgcaccagcttcgacattctctctgtttccgggtctataatgtggt  
ctagtcaagtaactctgcgattacaaaagtatttctactcagctagacgtgattttaggtaatgattgggcaacctataatgaaggatcgaagctga  
aatcagacgtcagtcacttcagaaaaatctagatccccttactattataagacttggtaataactttgtctttggatgtattgattttactactcc  
tatcttcaaaaatgtcccgttaaggaactgaattgtttggaactttcagttactctcagctcagtaatgatgttaataaggagtttaggactct  
ttcgtctatggggatgaagtgccagagcgggtttcaaaagtaatttcaattcaaaaaattacagtcgggtccgctaatctttccagctccgcca  
aactataatcaatcacttaagattgttgaacttcgaggttcagaagatctacttatggaattggagtacaaaatccaatgacacatatctga  
aaattattataacgtgggaagatttttaacgatgataagactgcaaaagcgaagagatttaggaaacaattgtaatgatatctctagctcc  
gtacttatttattcaattgaattctctaatcaacatatactgctctaaatgaatcagttgtcgtacttgcctgaaatagatagcaatttgatg  
cgactcgaaaacgatgaatatattatgaaaatthccttggaaatataaaggaaatcaataatgttgatcgtctatacgttgatggatattcta  
accttcataaagtggtggttattatcaacgatcgaattcagaatattctataaaaaactaaaaagaatcttgatgattttccttctattaga  
aaggactgatgataactacattaccgatttatttctcaaatcttttctaaaagattgttagataaaagcgttattttacagccaatatctatgct  
actaaaaaacgggtctatactgcttgaaccttactttaggttataacgtcagttttggcttaataaattaccttttcttctcagttgaaatctc  
cctgctatctattacgaagttatccgataagtgagggggtcttgaatcaaaatcttctactttgtaggcgttttaggagctttggatgttgaagt  
ggtgctgtatttaatatatgctcaaatgcttagctgaagttaaatgttacattgctactttcaaaagatatcaagttttgatacagactcctag  
ataaagcttcgagtacatctttgagccaagtgatttttcatctcgttcaacatcttgatactcaaaagagctgtcaacgaaatgtgatgga  
atthaggatgggacttttaagtggtctgtgaccattagaagccgggcaacttacaatctttcaaaatggatagattttactttgagctattctc  
acaagagttaacgattctgctcggaaatctcaactgagcttttctattttcagagcgcgctgaataatcagacttgattggcaatcacttaa  
gaagcaaatgagctgtcttaaaacttgcggaattcttgaactataaggagacaagttcagccttactagaactactgaagtcggcagaagcgt  
tttaagaacgtaaatatcgcttctgaatgattggatcttatgaccagatggtacgtgaactaactcttttttattgctttggatgaaataaa  
tgattattatgtgaaaatagaagtaagttgattaaattgcaataatcaagcggagatttaaggatcaagttagctttgtcttttcaaatggg  
atctggaaaaacttctttcatgatattggtcttgagaatthtctgaccctaatcgaaaaatattcagaaaaatctaaattgttaattgagttgtag  
gtgaacaatctcattagaaatcttaggaatctccgtccgaattcagtgacactttaggtgtctagcaggtctttcatataaagatttg  
ataacttttgtgcagaaaatthaaaggtttacagaattacagaaaaactccttggttattttttagctgtcaagcattcagaaacgaatthactga  
tcacattaaagaactgaataatgtccacctaataataatctttggaaccttatgttaactgaatgcaagattaccgatcttttagacattatgc  
ctttgctacgtgattthaaacgtaataatgtccaaaagaacattggcaaaagttatgtcagctatcggaatagtcattatgatccgtacgaga  
atthgaccttaggtatgtattaggctaaagttgtcttcaatattgcttataaaggaagttgttcaggaagctgctgaagaagcgtccattcgg  
gaatctttgcaatcaatatgccgaagctgtgcagagatgaatttcaattccttctttacgataacagaacttacaatthaaagattgtgatagac  
tagtatccgattgcaagaatggattgatcagttaaatgctataaaaatctgaaagctataatcaggtthaaagcttaactgatthtactg  
aaaaataagtcagttactgttttctaatatattgattgaagttcagcaatattggaacttttagatggcgtttttcaaaaaacgaagttt  
caatctttattactcaaaactactgttcttattatcattcgaccaagcttatactcaaggaattaactacttcttctcaaaaggaattgtagga  
tttcaaaagctgcaattaccaaaagacttgcgtgttactttgcttctcagctggttttgatatacaagaagctattggttattcttcaaaagtaacg  
attgaaatttctcgtctattttccttggatgaggacttactagagctggtttgcatatagacagtaatgctgctttggataagcatatcggaac  
ttgtttcctggaataaaaggactgttctcaatcaagaggagggtacaattgagaaagttgttacagatgagcaactaaaccttgcactttcatcg  
ccggtaaaaatcaacaaaagctggtgctttgattgggtcaattttattgaaaaagatatcaggaatgtgcttttgggaagttttctgtggcat  
atttcaattaaatcaaaactatggtatcaatggtttgaatgtttggttctgactggttgaagtcattccaagtcfaatattgctactttgtttc  
ttgttttctagatcaatccataaagcaaggaatcaatgcgaaggaactaccgctttgatagatgttagaaggcgggaattgactggttaagtaa  
ctacgcaattgatgacgataatgtgattttacgaaagaagttttattattcatcaacgaaaaactgcattataggtctttgctaaaaaccttgttg  
aacacaactataatgactattattggtctcgcgaaatthaaagttcttatgggatagatgaatctggtaagcattctataaatgttgaatgtttacg  
gttacctttccctatgctttcattatgtggagattgagaatctttcgtttatactgaactgaccagagagcttttcaacattgatacatgctatcc  
atthaggctttggagggtccatctgggctgcaggaacaggaaaaaaccgaaacagtaaaagcactcgggtcttatctggccgatattttc  
tatttaactgtgacgattcttcaattataaagtaatacggcaatthaaactggactatgccaactaggtgtatgcttcttggatgaattcaatc  
gactgaatcccggaaactttgagttcagtgctcaagatthcaactaatacagactaaaagtaagagaggttcaaaaatttagtgcgaattgac  
ggtaaaatgattgaaactgaccaagcttttctattttcgttaactthaaatcctaactatcacggcgttcggagttacttgcaatttgaagcgtct



atctcgtactgtttggatggaaaccctaattcatttcaaattgtcaggtacttctttatagtaatggcttcagaattcgtcttgccctgcaaagtgtt  
tgacttcttcttggaaattgtgccaaacaattttccaagtgtcatattatgattttggacttcgaactatactgcatcattaaaaatctttaa  
atctcgcgcaataatttactaaatgtgccgaattgatgatcttgaattaattatcaagcaattcagagtgtgactttaccagactgaatgtg  
aagacgcaaaggatttgaagatctgagaagaaagtatttgaagtatcagtataccaaacagtgagttaacgaccattaaaggctcaattgaa  
gccgtgctaaaggattataaatcaatatataactttacatatctcactcaaaaaatacttcaacttcatcagctttccgaagttacagtgaggatt  
catttatggtgtactggctcaggtaaaacaatacttgaagactcttttagatgctttcagtaaacttcagattaaaaatgagcactacgtgatt  
ctccaaaatctattgataaagattcccttttcggaacttttagacttgacaactcatgaatggacagatggtatatttaccaaaatactacgttcagc  
tataggtctgaaactcaatattggattttttgatgatgattacgcctgattgggtgaagctatgaacagttactggacgataaccgctttt  
gacattacctgatggcgaagaattcctctttctgataatgttaggattcttttgaagttgacaatattcagctgcaacaatggctactatcagta  
gatgtggtattgtatactgtgaccagcctatggcaataacactttatccagccattattgacgggattccccataaaaaagaaaactcaa  
aaacaagtacgctaagtatgaaactgtgatcagcattctttccgaactaccaatagtcgaatcctatgaatttccagtaattatcccatattat  
ggaattgaaaagcaaggatataagatacgttttgtatatttgaagaaattataatgcttatagattgcttgaggtaattactcctac  
gatgaagcaagcttgacgcttatatgaggaagaaattctacttccagtcgctgggcaagcattggtgattctgattagaatctcagcttagat  
ttacagactggataaaaaagaattatgatttagggaccgtataccagatactagcaaatatttggatttagatggtgatgctcaaaccctaaa  
agtggatagtccaaggaaagctccgagaatgactttaatgatggttcatcaaatttaagcgaatagtaaaaacacctgaagtaattcgtat  
ggtaaattgattaacgacttttattcatggataatttttggttttgtggacctctggctcaggaaagatgacaatgcttcatttttgaacg  
ataatgaagcaactgatgttctgtaatacttctcggcatctactccgcttatgctataattcgtcttggaaagaaataccatgtatagttta  
cgtccaattcatctacattgctccgaaaaacaaaagttattagctatattctttgatgaaatcaatttaccaaagcaaatcaagatggagga  
aacgacgctttatgtttctgagatgtgactgcattacaagggttttggcatcctaagttgaagaaatggataaattgaaaaggattgtatttt  
tggatgcatgaaacctcctacggattatggaaggtctcctgtcatcagctattctcagaaaatcaataattatacaaatatggatattcctagcttcg  
attcactcattagattataagcctatattgacagaattttgagctttgaggattataaccattcctggctataaatgagagggttcttgaatgt  
agtgtcaaggtttatgaagaaattaaacttcttttctcaaaagcagatattatccatacatatactccaagagaattaacaaaatggtttattg  
tttgcataaattggttgaatcactcagccggttacttctcagcagttacttcaattatggtatcatgaagcgtgtcaggtttctggataggctaa  
ataaaacggactttgaaactcggatgaaatcaaaagctcattatattcaaatatgaaggatttgacttcaagaaattaaaaattattatat  
atgtgattttttgaaaattacagtatagttactctgaataaccgtgaagttttatctcaaaaatataattgaggatttcagcattgcataatcaa  
attcactctttgctcctacagataaaaaactgtctggatgctattcggatlaaccgtgtttttgtacataatggttagcatctatctttatggtgaat  
atggatcgaaccagaaaaggttttagaattcgttaagctggaagcttggctataaattattcttttttaactcttgcttacagccacagtttttact  
taaggacgagttaaagacaatagttaaacttgggttctgatgatattaagctttgctttgtaattgatcatttcatgctgtaattcggacgcat  
ttgaggtatgaacaatttcttaccagatctgatataagctgtctgtttacagatgaagaatgggaaaatctcaggaagagtgtaattgctccgct  
atttgtgaaaattgaaagtgaaattcaaaaaatacaggacttaattctgaaaaccttcatgttttttatattctacacatcaagttataaa  
ggcctgaatgtgtatctcctgccctaataaacagatgcaccaccatttttccagcctcctgataaatcagactattcaagaagatttagtaataa  
gcttctaggtttttagagctatccaacgagttaaatgaaaaattctggcggagaacacagcgtctaaagttagtgagcctaattgtctggattaca  
tgtgtatatgaaagcttacttgcagaaaaaacagagtaactgaaatgaatccgaatgttttaactgatttcatcatctatttgaaaaacttttaa  
aaatctgcgcatctctatttgatgagaaggaccagttgatagtggtataaaaaactcaaggaactcagataatattcagcttttaaagac  
tgtttatacagcaagaaactgcgcttaatacgaaaacggatcatgcaaacactagttacataacttaagaaagcgaacaggaagtcgaa  
gtaagacaaaaggaagcgttagacttgagcacaatttgagaagcgaatgaagaaatgagtcataaaactcattggttttgaagaactctc  
aatggtaaaactgctatttggaaagccaagcctctgtcagcaatattaagaagatcatctcagagctgaggagcttttctatcctcctacc  
gttgcataactaacaatggaggcagatgcaagttactgggcataaagtgacatcttgaaatctgtacagctcttattgaaacgagaggatttt  
attactaacgttttgaatttatacagagaagcaactaagtcctcctcagaagcgtattgaaagcgaatacttttgcacgcatcctcctaaa  
tatgaagtcgcaatagggttagtaagcttggacctttgtttcttggattagatcgactgtaactattctaaagttctgcaagagtaagtc  
gttaaatgacaatgtctcgcacttaaaagcgaaggtgaagaaatgcagcacaactccttaacgttaaatcggtttcagaggggctcgataaa  
gaactagtggaaatgcaagaagattatgctactttgattactgaagtcacgcgttgaagcttgaacttacaagattcaagataaagtcaaaag  
gagtcataaaatgatgatgctacggaaaaagttactgggagaattttgtaacgatttggagagattatccgaattgaatggcc  
atagtttttgggttccttttggtaaattatacaggtttattggatcctatcgaacgagaaccgttattgagcatgtttctcagttttatccaaga  
gaattatcagctcaaaaaagaatataatgtacttctacaggaactttttataatgtgttgggtgaggcaaaacttcttttaaagacgatcact  
ttattacgaatattggcgaataaagtaagtgtgtgagaccagcttttagtaattgatccctctttttatgctttcgaatcattgaaagcatgttttgag  
attcctgatttgcctaaagcttatcaagtaaaactttaaagagtcattgaaagcagccttaaaacttaggaaccaataataatcaaggtatgg  
agtattggtctcctattagatttacttataactccagaacttactcgggatctggaaatgtatctataaagtttcaaggaagatattgaaat

ctgtgcctcttaaagtgatcatctactctaacacatttaagtattcttttattacttataagataagcagttttactaccatcgcaatttacaccatc  
gtcatctgggttgagtaaagaattgttaaacctcgctgattgatatggaaaacagtgatttactaaaaagcaacattatactagagaacgactagt  
acaataaagtcagagttattgactctgcaaaagaatcttctgactattctttcgactcttaacattgacatcctagcaaatgatgatgttttaatta  
tttaaacactatacgttctcgattgatgaaaagggaaaatctggatttggaaatggattatgctcgaaagaaaaatttccgagatgagttgtcattt  
taccaggagtattgaattgtttacctttttgattcttgtttcaaagtgatgagtgtaagaaattctcgatacgatacatcaatgaagtcttctgctt  
attatataatcagctgctcctaaagattaatcattaagtgagactgcagcgaaacctgaagattatthaattatcatgaagataatggttgaa  
aattgtgtttatcaattctgcaaaaagatagatcattgtttgtgttttgattcggcttgcctttttatagggaaatccgaaatactctggaagtcaa  
ttggtgtggaccttagttctatcatgggtagatttaactttagaagtcattgtttgcaaccacaagatcgagaaacgtgcaagaattctataa  
aaaattggagaagtcggacatttcagaagtgattatttctttataaagtgtttctcagaaactgtactaggcattaatgtttgaaataacca  
actaagctagataccatcatatccgaaggcataagtaacgatatgccgttgatcgttattccgttgaatggaatagataaaagcaatatatgga  
acagtgtttagctgaaagagaagtcattgtattacaataccaatgggctcattagactcagaagaacttccgatgtgactttaagtaaagcag  
aacaggagccttgtgggtttcttagaaaacattcacctttctcagagatggttggaaagtctgtcatccaagctgaaagcaggcttgcacctaa  
atthagatggatgcacttcagatatctcatttaaatctcactggttatcatctaatttccgtacctatatttctgatttaaaccttagcttcaa  
gaagtattgatgagaaatttgaagttgtctttagactgaattgggcatacctcaacaatcgggtatcctatcttcttatagcctggatccatac  
aattctctttgagaaattgtgtattattgaaagcaatgagcaagtcgtactgacataaacgacgttgattattcacggcgatgaatgcactctg  
gcatgtgtaagctatcatctagccaaaggactagcgaagacctccaaatttccctgggacatgttcaggaaactgtaattaatcgcatac  
gctcctaaagtgtcaaggcagaacgatctatcttaagcagatgtcctcaatattttgttaacaattaagagaaggtaaattacagaatcttt  
ctctagctcaaatcaaaggctgaaccacctctgacatatactctgtcggctgtgaaaacttcactaaaggcttacctgacaatattccttccgt  
atggcttggatggaaagtacgttgcaatcaataccgacagataaaatccaaaggggttggaaagattatcaaaacttactacagagatca  
aaactgttaacattaatcgttgaataatgatgataaaacggacaatttaaccaactaatctccaagttattataatatttagac  
ataaaaatattgattaaatgaattatctaaaacccctcaaacgggtatgtccaaaattaagtaaaccataggaaaaatattgattcgtttt  
catgattactgttttttaagttaggcgcctagaataacaaaaataattacagaatatttaaaatgaagtccttttttagccaattagttt  
aagcagatcccataagtcgaagagcaaggcttctgtatcttcgagagaagtaggtgttcaacctcgatgacattagttggctcttcatcatgatc  
gctgtctcaaaccatttcttggacgcttttactgacggcttcatcactctactagcatcttctgcagcagtttccaccacggcctcatttctgca  
gctgaagagaagtcagtttctcagcagcagctcaagttctgacgtcttcttttctttcacggcgttttctttagctctttgtctgtgcatc  
cgctttcttagcgcacatctttagcggcctaagtgcttgaatcaaaagtgaaggatcaccagatttacgaaagtttcttctgtattgacagcat  
aaaaggtacagcatttcttctcatcaagaaaacttctgtggtcccttttatgtttaagcatagccttttagacgcagccaatttcttttag  
tttagattataatcaactatttcttccgcttcagcatggcttccggtaattcatgatttagcccgcttacttgaaaaagcttcatcctcatcg  
tcgcttcatcacgttcaacaagctttgtctatgaggagccaatacgttctgatttttcttctgcaacacgcgatcatatttagccgaacatcctg  
agctgattagcgttctcgattcatttccgacgaagactcagagggagagccaggaccaatttgcttttgatcttctgcaggctcagcagcac  
ctttccgagaagcaccaaatttaatttgggagtagcgggaagaccaagagattctgcgtaagcctcaaaaggaagcttataaactgaaagact  
tcttctcttctgcaatatacagaacgcaataagaaatgaaactctttgtccaaggtatttaatatcatttcttgaacacagatttgaag  
ttgattacggatgctgttcttttcttctttgatgttgatacgttctaccggaatcttttagactccaaactgtaaaagcttctcctcggagg  
gagtaatagaagtaagcattacctccctattaaaacgggctgtacgacctcggatgaatgtaggtatcaacatcttctggggcgtccaattg  
tacgaccaatctacagctggaatcaagcccttctgcacaatatcagtaaaaacaagacagcattttgagacgacgtaaaccttgcagtaa  
cgtcgatacgagaagcttcttctgttccatgcaagtgcataaagaataaccaggacgtaaacggcggaggcttcaaaaacaaaccgtac  
ttgcttacaagatgaaagaagacgatagattgttctttaaagtagtgcaatgaaaccaataaaatgtcaagctttcagtaaaaggagaga  
tcaggtaaaactgatttaagttttaggagtagaagaacctcgttttctgtggacagcaatattcaggattctgcaaaagacaaacagactaat  
cacgaactgactttgtctgagtagctgaaaacaaaagcgtttgacgctccttgggtaagctggcaacgatggcatcaaaagtgacttaaatccc  
atatccagaattctgtctcctcgtccaggatgagcatttgcaagtttaggtatcgaagtaattgcttggctcatgtgctggagaagccttctgg  
ggtacaacaagatattcatacgcgaaagacgctcctgttctttataattattaccgcaataattaaccagcggagaaggaatgaagac  
ggcctactttgacaaaagttcaaaaagttgaatggccaactcacgcgtaggggagataaataacgcacctaggccgtcaaatgggtccacttac  
gacggtacaggtttcaataaaggaacaatgaacgccagcgtttaccactaccagctcctggctgcgctaaaacatctcggccttttaagactt  
caggaaattgcctgtcttggatctgttaaagtagtaaaatgagcattttcagagcgttttgggtgtgtaatgggtaaatcaagaaatg  
cgtggcatccccgaaaagtcacttactgagcattcagcttgaatttctgttcttcttttctgttttaactgacgagcctctactcctccac  
tatgattttaggcattgatccctaaagtaagatgatggtaaaaggacactttttctgggtttgtaaagcttttgcgtattcgttaaccctcactt  
aacgttttgaacgtacagtagaacgatgctatgtgggagagattgatgtaggaacatttgggggttttaggtggggtccagtcatttaggac  
aaacagggatggaaggattcagtgggggtaaaagcaatcatgagcgaactcaaaagattttcaaaaagtaaaataaactcgtaaaaca

ttaaacaatcagtataagaaaggaacttgggtacaaatgtggatgaaaagaattaacaacgtacgcgaaatgattggttctcttctgttt  
gaaaatgcagttatacatttcgggttttaccttttagttgatggaagagaattgccattagacaataagttgaacattgaaggttctttcttc  
tcaattcgttctttattatgaccacaggtatctgttctgcgtgattcaatctcgtatttccaaattaagaagaatgcataattggttatctgtgaa  
aagtgaagaacgaggaaacgaaagaacaacttatgtttatttatcttctttctagtaaaatctattcttattgttatgattataaccaaga  
aacatcaaaatgaatcatcactgtttatgtttacaaaacaacatccagggtattaacgattccaacatttctctttaaattcaaattctctgt  
cgcttgctacatgggtttctactcattgtaaagtgaataatctaaatctgaattttttttttttttttttttttttttttttttttttttttt  
aactcattcgtcttagtctttttgccttagtctatgagtctttattcttctgtctaaagcagcagttgtagagtagaatgatcttaagattgcgac  
acgtcgaacaacaattgcttttcaatcaaatccaactttttctacaaacaattttgggaagcagaagaatattcagcatggctgccaagatg  
aatacgttatcactgaataaaagtgaaacagcttacaataatcttttagaagtgtcaaaacttataggtcaagagaccgaacaagaaccag  
aacttcgattcgcaggagggtgggtacgcgataaactcttggaaatcgaaagccatgacattgatgtagcagttgattgatgccaggatagatt  
ttgctaaacgctgcaaacgtattcagggagaacatccagaatgcagaactgcattgtcaaaattgacgctaaccctgaaaaatccaagca  
cctggagactgctacagccaaaattctggcaaggacattgactttgtcaactacgacctcactttttcgaattctatctgacttgaatacat  
cgatattcggaaacccttggaggatgctttacgctgacgctacggtgaatgactttttataatttactgacaaaacaagtagaagacttta  
cagaaaagggtttgtcggacttggaaaaaaaatttctgtacaccgctacctgcatgaaacattttctgacgatctttacgagccgttcgtg  
tatccgatttgcctcgaatttaactttgaaatccatccagatacttcttctttaaaccatagcttacatgagcacttcgctcaaatatta  
gtcgtgaaactatcgggttggaaatcgataaattctatcccgttaagtttatggccaagttcgttttactgacgatattcttttagattgtgacact  
agtcgagcattccgtatcattcacgattccggtttgttctctattttgggctcttcttgggcactataaaaaacatcgtttcaaaaaactggac  
tcccttagtcttataccaaaagcaggtgatctgtttgatcaattgcgagaggaagccttctttaaaccatctgcatgctcagtagatgctt  
ctgggtcgccgtagccgtgctcccttggcataactggacgtatgtcgagaaatccaaggaaacgatcactggctctatttctgtagcgcgacagctt  
aaatagcaaacccatcatattgcaagtagagagcttataactcattaccctgctgttatgaaaagaattagtagcttctctcatgctcaggt  
tatcaagggtggagtatgtaaaactgtagcgaacttggacaatattgaaagatgttatcaactgggcttctttatgaatctactcacgaaag  
gctctttactgaagaagtagacgaagcggtaacaaagtctccctactttgattctcttataaaaaatagaggatcatgattgactgaagc  
ttacagcattcagcccgtcctaaactgtagtactaatgaagtgaatactgagttactaactatcatacttttaggggaaagagctaaagttcgtt  
ttaaatacgaagccaggaccacatttaaacaatgttggaaagagtccttagaatggaagttgcaatttctgacagaaaaaagaagattata  
ttaagttcgaacagagaagtataaaacggattcattcggacagaaataaaaattaataaaattataggaagtaaatattataaataaag  
tatatccaggcatctattcatatttaagcagttttatagtcgaaatccaagcactataaagcgcgatctttctgtgtaatgccttttgaagcgt  
gctttcattatcttcaaacagccgtatttagtgaatcatgataaactgtaagctttttcccttacttcttaacattatctgaaacattagcata  
agtcataaagcagttcagctttagctgttcatagctgatattttcaaaaggctgtgttactataatttccgaattgaaaaatttctgtgaagcattc  
atgtcagcactaggtattttgaaatccaactgcttccatcttattcaggactttagaatcctgttgacgggaggaagttctgctgttcttatgc  
ttctgctctgattttatcttactataaacagccatttataaagaactctttaaactttcaccatcgtatcctcattcgaatcagaagacg  
gcttttcatatttaaaatctagttttgatctgtccgtggaataaaaggattaaatgacgggtttcaattccaataaccagtatacgaaacaggtaat  
aaagatttttaataatggaataaaacttaaaggggcaaaattcaaagtagaaatcatattcggaaagtaacacactagagaggaggaaatc  
gattacaggtatacagcttcaaaaataatcaggtaactctggacgtttgcgctggatgttgcactgtaaaaacttttaagcttaacgaaga  
attcagatacaatggtgtccacaaaatcgataatccgctctaccagtaaccatttttaacttttcagtaaagttacttatcctgttctccccac  
aataacgctttgtctataacggtaaagttccaggaatagatcaatggcatctgtctgaaatccacgaaagaattgctataaaaacgcttg  
acactttcaataagatctctgtgtagtagaccactgattgcttctcggtagggtgctaaaggtttactaataacgatcctccatattgtaagca  
atcgtatccccatgtccatggtacatttctgcaagtaaacgcacagcatcagattcgtaaacaagttctggggagtcaaaaactccaaggtattgc  
aactgataagctaatgcattttccgaaaaaaactgcgctgcatttagtagcacaacagcttacacaattagttcctcaatgctcctgttgaa  
atgttcttggaaaaatctactagaagtgagaataatcctgttttttaataatataagccatagtttcaaaagtttctgtagcggagttttc  
taaaagggttagcattaaattgactaaaaacgctgtacttacttttagaagctgcagacatcccacaaatgtagtattttcttcaagg  
atcaagaaattggttaagataattaatagccaactcaaatcattaagtaaaagagattcgcgtctcacctttctgttgattttataaggtgaga  
acaatacaaggggccccataatgacaaaaagacgatcaaagtgaagagcagctgctgaataaaaaggatcatttacggttaataccgattggt  
ggtttgggagtgatattgtgaaactctgcgaccatcgaagcggaaatgctacctctatgctgaacatagctgtgtagcaaggtataaccaggagca  
ttagatgatactgggaaggaagatactgatccatcaatactatctgttcagtttcaactcatttgcgacgtaaccatcgtctcttatccctgctt  
aaaaaacgagcactgcataatgacgggatctacgggtattaaagtaacgattattggtttccgtaaactgagagcttaacaatgattagac  
taaaaaacgtaacctcaaaacttagcttgcgacgaaaccgtgaatcaggggaatgaccacggagagtaaacctacagtttcaaaaat  
aggctgaagcatcgaccaattccacacgaacatgtcccgaacttgggtcttgggatagggtagtaaaactatactgactgtttgaaagat  
catagctgtagctatagtaaaacgtcctcgaagatccactttctcaatacttgagagacacctatagaatttcgttagaaatagtcgggccactt

gatgtcatcatactttttctgcatagctttgtttctgctatttggatatagctcgataaatcgagtattatccacgtgatatatgctgtgctctcaa  
ctacggcaactgttctcctagctgtacacaaataaataatagctcgacgtaaaacgagtgaaagcctagaattgcataagcattgaggatgaag  
gtaattttcccctctgagctattgccttcttattcgaaagaattctgaaagtcattttatcaaatgttccattatgtttcaataaagatattgg  
ttcatttctcgaaggaataatctttagtactcgaaacgacgatgctgtgacattttccaacaataatataatgtctttcagttagaaaaaaaaga  
aagtttttataattatccttactttttaaattatataaagcatattttaccaatggctcatcttgagtagtagccggcatccatgtatgttgatgct  
gtagccagtggttagcctaaagactttcttaaatatcttaatgcccgaaaaagcctctaatcttttatgataatagagatttttaggtaacttta  
aaaaggaatctttaaaaagattacctaacaacatatggttaaaaatgcttcaattacactaactgatgttgatgacaaagatggctctgag  
ctgtaaactgtaacaaaaaggagaaaacactactaatttagtcagaaaggatgtaaaagaaagtgctttgaaacatatgggtagaaatagg  
tcaataaacttttttagcaatctggctactcctgtaaaacctttcatactattgttctaatggtttcaatttagcattgtctttggttggattgtgtt  
cgtaaaatctgtctgattgatattgtaagtaaacgtcacaataatcacagacagaatagtgttttgattggtattgaaatctaggtttacattt  
attaataagttgatgttgattcgcaatatacagtgcttccacacctggctgatacaatgattcgaccaaggatctaaagtagaaagattttcct  
ggggatttaccacgtaaccgtacgaatattgtaataattttcagaattgacctcctttacctttcaattatctgtagataatctagaacgagtgat  
tcttcataattatgattttttccatcttccaccgtaacaaacaaaatgatacttttctcaaggtaacgaacggtttggagtagcagaacaca  
acccttagtaacaagttgaagtagcacgttcttctgctttcacttttgaacataaaagttgatagcgaacatatcagggaaagattgtatgaaac  
aatcataaataatgtctataaataaagaatttctactttactttacataggtttgaaataatgaatgaaaactttatgactttttttagaaga  
tttatttggagcataaacaacagaaacaacaacattaaccttataacataaaaaaggataaacaacaaaggaacttcaaaaat  
agtatatgaaaattatgctgtggcagaataatggcacactctggtggacgaagattggactttttgatcgaaaaggagaataagaatcatggt  
tgtgaaagcgtgacggaagttcgggagactctgaaaggaagcctttaaataacaatacttttgttcccttaaggcaaaattggttttcatc  
agcaacgttttgagatcgtaacgatcatcataagaataatgaagatagctttttaaaggtggatgagattgaaagattccattgccttcatt  
gcagcgtaaatgctgttatagataatagatccagcacttttggtttgagaatggaagcttctacagcaccgaatattttaaatacagaggca  
agctcacttcgagtgatagaggggtggatcattcgaaggaaatgcttcgagataccttagcaattgcataataatggttggcagtataagga  
ttgttagatttagccattctagtttactggcgaccatgtaagtaaggcgggtgttttgacgagcttgaagaaaatctttgatcataagactc  
aagaaaagtgacaaagcaaatttttcttgaaatatagtgaatttcttctaaaggaaatcctttaaacaactgctgatttcaaatgctttgtg  
ccttatgaatgttctcaagaaaagattcgattttggagcaagggtcaagatcagagacaagacaataatcattagaaggtttgaaataata  
tccatctcaataagttcagagaggtcagtaaaagcttttctgtaaatctagagggcagccaacaagcgtaggagaaagtgagcgggaggagc  
ttctcgaagaagacagctcgggtgttaactttgggagattcatgaaatcgtttataggttttcatcggtatgctgtggggggagagaaccaatgg  
aactggtattggagaaggattccatgtactaggggtttttcggttaactccgtttcggacatgtcttctgtttgtatctgtgtcaattgaggtag  
aagaaacagagggtaaagctttcttgaactggggtagaatcattatcagaatagtcattcgcattaaaaaggtttctttagaagaagagaag  
taatttgatgttacattagatccttgcggtagatctttgtctttatcgcttatagctttgtctttagcctcatggtcaataacggcatctaatttgaatt  
cggggataagctgtcatatgcttcatgaatagtagaatttataacattcaaatcatttgagctaggataaatgatggctgtatcgtcctcggga  
tattcacttctgaaggtaggcgaagggagaagatgcatctacatcagaataggagaaatcgtcggactagcgcattcattagaagattcagt  
cagtcttgggttgggggatgacaagcagaggaggaggtattggtgacgttttgaaggcaggaatattggaatgacattcaagaacggaattg  
gatacattgtttttgtacaggaagtattaggggtcttttggaaagaattatagaaataagagaagattgttcgctttttatttggactggtatgg  
tcttcaaggaattacttcaggctcagatatacgaacagacttttcttctgtagtatcgacaaaactcctgtttttcccttataaattatttctgtag  
caggtactttgtctaggacaccgttttcagacaaacaaggagggttagctggaatttcttttctcaagtttgtaataagacttcttactgagggga  
cttttttaggaaaagtattgcatgctttcagtagaagatcattgagttatgaataatggattcaactttaggtttcgtgaaattagaaccagca  
acagttttctgacttggaaatcagtggtgtagtagcgtacacatcttcataaaaaaacagcaattcaaattttataataaggggtgggaagca  
agaaaatcgatacaataaagagcatctgcaataacttaagtagtgatgaaatagagccggtttctgtgcaaaactgaaataagctcggctttacc  
gagagaacataaaagttgaatcaaagctgcttctgcaaaaataaaaggagaccggaaattgaacatttctactaacaacatcctcgatgacag  
gcttcaataatggatggttcaaaggcataggatcgtatggttgagacaatgagtcgctgtttctttaaagtaaaatcgggtgtaacggacaggtta  
tagaagtcaagagcatcagcagcggaaagaaagctaggaagagttgatttcttcatgaatggggacaacacgttctagggttccaaagcgtg  
caagatgtagaaattcggaaacattgtagagagatggcatattgtgaataaggacagcagcagataatcccagtaaccataaggaagaactgaa  
agttggtaaagtcatttccattattcagatcattttcagtagcgggttggagtagaggaggtcgttgagtgatccatgcaaaagttggctagagt  
actagcttgttcaagaaccgttttggcagagcattaaaaggtatgggataaggcatttgtgcaaaacttacattcattggtttcatatgcat  
tgcataattccataggaatcctttaggtacagaggcatgtaagaattgcaataagtcagggagagaagataggccatccgtgggacggt  
taatgcgaatgttagcgggaacgaaatgggctgagaagattgttgcattgtaagagaacaggtaaaatagcgttgagaagataataaaaa  
aataataaggatagaagcttgatgaagagatcagaaaagagaattgttattcttgcgttatatgtatataacaggagtcaaatgtaaacaga  
caaaagtgagaggaagagtaaacgagtagcaaaaataaagaagcttggtaaacacagatcgattgcttgaagattggggaaaaggatgg

agaaaggggggtatttatgcttttcaatcagagattgaatcaatatcttgaatccaaaacgacataaaaacattccattgtttgtttacttg  
atattaagttccattattagaggataatgCGGTATTTTCTAAAAATACGACGTAAGCGAACGCATTCCGGCTCGTCTAGCCAACATTTCCACGTT  
tctaaattaaggggagaataaacagaaactcaaataaaaaagaccaataaatgttaggaaggtttgattaccacacctttcactaaatata  
tttgtttgttttaccaaaaggcgatattttattagagaatgagttcgtaacggaaaaagaagccaattagctgagaactttatttatttct  
tttaaaaacagaactatactctgttttaaggtttcccactaattcccacgattttgagtgcaattattgaaataaccttttaagaattgggga  
tagttgttacgttactacgcccacatttctccttagaggcgaaggcacaactcgcttggcttgtgtacctcaggagctcaatagctacta  
acctttatgcttacgaaagttaacgaaatgacaaaagtgtctgagtatgtaaacagacaatgtttacaataaacaagttcatggatgtttat  
gtatgaatgtgtgactgttatgtgagggttaagcaagttattatagatgctgagtaaaacaagaatggataggcttactacatactattaa  
actcttgattacagcatgtggttcagattcataatacatatagctccaaagggaaacttgctgctctatacagtaagtactctacatgaatcgctg  
tttattttaataacgcccagaactatataatgagaatagttcctaacgaattgctagagagaaccaagttccttctgtttgttattgcctttc  
agttacaagaagctagcgtcaacaacacggatgaatataatgatcaataaacaagctgattttttgatggagtaattttattgtaacatgggat  
tcaactgatgactgaaatctaataatgatattagatccttgcaagcatcgtttgtatataatgtcagaattataagtcctttattaagattgat  
atttcagtagtctttgtaaactcaagtaggaagctagctagggagctaaatttgcaatattagtgatcaaaatgaaatggtaaaaagctt  
aaaggttctcttaattcatatttcatatatttcatggaataactgctttaaagaggcattttctccacatacagtaacaagcagattgtttattcat  
ctgtattgaaatcctagaccagaagaatgattggaagctgtctaatgagaaatggatctttcactacataagtagaatagattgaatccataac  
ttacggaagaatgtttaaagactgttacttggaaactcagttgaaagcaagctttactttttgcaatggcaccacaagaggacgattt  
catgaaaagcaatattgattggtaaacataaaatggaaaaagaattcaatgaagaataataaacgatcaaaattgacatcttagatgattac  
caataatgaaaaatccattggttttttcataaacaagctggattttcaacattcaatctccttactaattcctcctcttaaacatctaca  
atgtgcaaatcgtatttaagcattaaatttacgattttcgcatagctaggtaaccaataccaacaacgaccttaagatttctgaaaaatagaa  
aatcacatcttttgaaaagcaactgaaagtcaaagtaagccataattgttagagttgtaaaatctttatactgttgcatgaattgagataaac  
tcgtaaattttgacataaagctgagcagaatgactacggaatgtgaaatgaaatcccgtacagcagttgtttctgtcttcgagcgtactct  
tcaaaatttcttcttcccctgtctttaaagtcaatttttcatgcaatggtaatctccatcggttcttattctggacgaaactctcctctatgat  
ggggattttgaagctcaacgacattggatggagttgactctgactctcctatctcaaattggctattgaaatctggaatgggtggggattggatt  
atcccccttgacggcatatgtttcattattgttcggatataatggctactatttcttgatcctagctggttgctcattttcttctcaggattcgaga  
atctcagttgaagctgtatatagagaactacgttattcttctcaccttctatttttagtaccctttgatattttactctaagtggtgggctagacg  
gttctctgattctgcaacgtaatgactgcttctgtatggttctttcaaccgcttactactgtcgacatggctattccaataaactgtgta  
tgcttggcttgtaatgtactctatcgcaaatctttgaaaaatcaatattgtgctgagcattcctgttctgcttagctcttctttaaagcagatggc  
ttatactttgacattcattctttgcttatttacttgggtggtgcttcaaaccctaatccagttttccagactgtttgccttggcaatcactgttataat  
tacttttggtttaattgttttccctggatctatattgactataaaactcaattaccacaggtattcaccgatctttcttttgctagaggggtatttg  
aagacaaagctgcaaatctgtgtgctatcaatacagttttaaagtaagagatttttagtactcaacattacaatgctatctttattgttta  
cactgatctctatactccgtctgctgcttctttctgtatccgagaaaaagattgtagcccttggcttgcgaatgctgctggggattctttttg  
ttttcattcaagttcacgagaagtcctgctaatcctcttttataactactgttatactttgtcacggacattcaactacaagcttggatagctt  
tagcgaataaccttggcatgtttaggatgaagaaagttatttttttataaataaactaattgttttttagtttatggcctctttgaaaaaggac  
aacctcggattacagttttaccgttctacttatgtggaactggattggtaaaatggctgcttttccaaaacattctttccgttatttgcaaatg  
gtatgaaaaacttctccttataatatttccattaataactaacatggctcaggcattttatctcgcatgattataatttctgcttctgactgttta  
taacacctcttctgataccggatctatggatgttctaaacttactctcttttctgctgatttctgcttatataattatggacactgtctaggta  
ctttacattctagcaggttatcaacagattacgaacgaaaaagcatgcttagttttgatttctccttcaattcactatttgactaccgttagtt  
taacattcatagttaaattgaaaaaagaatgttattcattacgaaaaactaaacgaaagttacttttaacctaaacaataaatttaagct  
aagattcccttcattagaaaaagaacgattatagaacaaataaccgtcatccattataatattcagccaacaccattaatcaataccagattga  
ttataatgactgtaagctgatataatgagatcgaagaaatttaataataaataaacaagaacgagaatgaaatttatcatgagaaaccggaa  
acattcaggtttcttaattatggcctgctgaggttcaaacctggattctgaacaactacgctcaagtaaatcttctatcagttggcagaaga  
cgaagcagtcgattcagctactcagatcctggaggaaactcagatgttaaagtagtagtaactttacgtataggttctcctgcttctgtagat  
gagacttgccttgaagatattgtgctcagctcattgtgtaagtatacttccacagcgtttggctaaactcttggaaagttcatgacagattgta  
tagaatagggctggatcatcaacaacataactatctgttagaacctcagaaattttcaaaattcattcagtgatgaacagcttcaata  
gcaagaaaacttctcactggatcattgcttttggaaatagatatactcggagtaatgactgtgcaagattgtgtatgtccatcttactcccac  
ttcgtcatcaatattgggaaaaagatcgaccccaaaaacaagaatccaaagatattttcattgtatcacgatgacttttggtaacaacatctcgt  
caggtgcaaaactcggagacgctcttctcggattccagcttgaagacgtgatgaataacccaaataactgaaagtaagcaacggatcagga  
agttctttaaataattcttaataatgctgcaagttgaataggtgattcctcctcgtacttgatactttccggtgatgtatccaacaaatctgaaagc

tctttaatcgccgaatattaccattcttctaaaaacactacaacagacatatcttcttctcatagccgaatcgattatcaatgaatgttga  
atgttttattaacaagatctccagaataagcattcttcttcaaccaacacttcaacggaacaccgaatgttcttctttttatgctctttt  
atcttcttctttaaagctttacaaacttttccaaaaaccgcttctgtaaatcactcatttccattaattcctagtctcggacgagtgat  
agaatcaatacagcaacatgacgaacaaatagttgtccagggtgtgagttccgacaaataaccgagcggcggttctgtagacggcg  
gtttgtagcactgctaccagattgttagcgttttcttaccggaagaatcagtgtaactggcatatgcctaaacgatttggcgtgctc  
gcgatttcttctccgaatgaccttaggatcatccagagtgatgcccattctcatcaaacgcatccatccgtctctctaaattagtgtaa  
ttccatcgcaactctccattcgtagctttatcagattcatcaaccgcttggatgtgattatgataaacaaggggatcttcattgtagcctga  
aagtcagattcatctggattatatacttagctttagctcagatgtgcttctcagactacgagaagacttaagccgacgagatcattaaagt  
tagcataatttttaaaactatctgcttccgtattgtgagttttctcgggtggctagacgatgaagacgggtgctatcattatgataggagg  
tattggctacttgagtagcatgaactttagtattgctataagcgaatcagagcaattgaagcaagtaagtatactgggacaggcgactgaca  
tattgaaatagggctgctgtcagaagtattggagcgtggagtcggtatagcaaagatagcattcaatctgatttaagcataattccatcgtg  
ccaatcataatttccagattgtatctcgcatttgcacatgataaacagccgataggttaagtcttctccaacaagatgcaatcttctcaa  
gagcagtagacaaacgaaacaagatcagaattcgcagtagcaaggtgaagaaaaatcaaggggtgattcgtcgaatttcttggtaac  
gaacttgactcttccataataagcaaaaattgtgtagtgcagcttacaagaatgttctgttctagacgtaatccaccagtcaaagatctt  
attagtaattcaaatagtgagcaagaccagtaagagagaaaggaagtctgcaccacggaacatcccgatcagaattatgacattag  
ctaataagcgaatagagactaatttttacaagtagcttggcttctcgaatagggcacttttagcacgaaaactagcaagggcagttt  
ctaataatcaatcccttgaagagatttctatgtaacgaatgaattttgagcgcataaaacacttcttgaagctcatttgatacattaag  
caacatgtcactaatgcatgaagctgtatcttccaagcaggagagcagatgcaaatgtggaatattttgttctaaattcttccagcttcc  
gtagctgtgaatgagataatggatcaggaattttgttcataggacttggagaaagttgacgttccaaaattataatcatgtggcaggg  
aacatgcaatttgaagcgccttctatagattcaacaactgttttaaataggccatcgcaaccataacagtggtccgcaaacagagt  
agaataatgataatgacagtatacttcccttctgctcatagtagttagtccaaatagtggtacacaaagtaacagtgaaatgtc  
aatatgatacttttgtgagtgctgtaataataaacgcgaagagccatgtcacaattgacataaaaggttaaccggcgaagtaatccgt  
ttcgcaaaagggacttgaccagaaggacttggggcattgattgggaaaaacttactagcaaccaagtagcagctataacacttaaaacac  
tccaaatgatagacattccaagagcgcgaacatactgactagcaatcgttgggtgacgctccacatgttcttctgtaaggttcttgcgaaac  
gaggaggactcagcgttccgaacgcttaagattcaattgttactgtatcctgatggaattttgtctgtaactgtggttctgtaacgcttcc  
gagattcggcagagggtgtcgtctagacaaaccaggagtaaatggatttctcaggtattatactatttgaactctagaagagcttctgaa  
acaccgactacgatcatgacttgtttgttaggaactcttctggtttgtgataccgttccactcttggaaattagatctcaaattatcggcatc  
ccttgggacatagtgcttccagcttctaaacaaatctttaccctaattaataaacgcaaatattatagccttctttaggactatcgatcga  
tttaggaacgatttcttcaacttctcgatctcactacaatagtagcttcttcaacaagaatataaaaaagaagaagttgcca  
ataataaaagttcttttcaatgtgaacaacttcaactcgtcgatacttctcagagatgttctgtagctgtaggatgctgaaagtcaggat  
gtttaggggtacacaaaagctactgaccgacctcataaacaccatcaacataaatgttcaaaagtagttattgttctttaaagatacta  
gtttagaatctttacaattacaagatcgtcacaacaaactgtttatataagtggttaaaaaataatttaatgtcgtatcagaggataagaac  
aaagggtatttaaactgatcttgtttattgttctaaagaaaaagaagaagattcaagaggctcgtacctctgtaattgggcatcttttagta  
actttattgaaaccagtgttcatcatacaagtaacacatgagagagcctttctctatattcctaataatagtaaaaggaattacctatgagaa  
ctcaatatcgtgtttatggtatctattctgtaaaggattacgattcaaacagcagcagaaagcacaggagtagctgtaagtagcttcttagt  
aacagtccaaactgtagaaaaagactgtagaatgttttataatctgttccaaatcaacgtatttggcgggtctgaaacacgtaaaatag  
ccttgaattctttatgagaaccagaggagaaaactctgcaagattcgagtaattcagaactgtaaggagcttcttagacagcctaagtt  
gcttggcaatggtacaatgaaggaataagataacgcattcaagtcctagtagcaccattcgttttctttaaagttggccattattagc  
gcaaaagaaaaataaaaagcttagcacgaatctcaagagtcgcaaaaaccatgtttattgttgaagtcgatacattgcagacggctgtac  
aaaaacaaattcttcaattattcaagaggattaaatcatttccattgttttagcttactttccaataattgttacaagccattgaagtaagta  
ccatgggtagttatggaatacctaagcaaaactcaatccctccaccaatattaatattcatcaattttcggttaatggggaaaaatggatcaca  
attaaagaatttaaaaactctatccgacagcggattgttagctcgaacctggtcgtaaaaagggaaaaaagaaaggagtagattctcga  
gaagaccgacagacaaaagtagataaaatccagtcagatgtatgtttttgaagaactagtaaatgaattcgtgtaacatagtagcag  
tttaattgtttgatcgcaattcaccagaagcaaatcgatgtagggcgtagacgcgtaaaaggcactgaaggaattcctggtgtagccgag  
gtcgggtgaagaaatcgaaaaagacgataggtgaaaaactaagaaaaagaatcatgtgggtggagtcattgatcgcggtttgtgaaata  
atcctcattgtccctgaagagaaaatgtagagcgttttagccgtgaacaacaacgcgtagcaaaaaagacatctacaatttagactcagaa  
aacgatgctttagctcatgaaagaggccatttccgattggatgattttgatgaaccgatctagcttgggagacgaggatgatgaaggctta  
aacaacgaagttgtcgtcagatgacttggcggccttggagaagatgagcctcaagaggatgaaggcgaaccgaagcaaaagaagccaag

caagaagtattgtcagagattattgcaaagtctaagacgcacaaagctgaacgtcaagccgacaaagatgagtacgaaggagaacgggagag  
attggatgaagaatggaagattgcaaagcgagctttcgaacttttagaaagaagcaaaacgtaaaacaagctcgaaaaatcaagcttacg  
gccttcagatgcggattctcggtatgatgagttcgtccgagaaatggtattcgaccgacgagcacgcccttcagaaagaacaagacagaggaa  
gaacttgctcaaatgaagctgaccgctacgtgagcttgaagaccaacgtcttacgcgcatgcaggatgatgagattgattatcctgaagcgga  
agctgtggaacaagctctagggctactgataatgttttggtttggtaagggctaatgttggagggtgaagatgaagatgaagaagaatcaa  
tggatcatctgatagtaagaagaatggacaggtattgaggaagggccaaagaggccgataacgcaaaaaacgacgagaaaaagggtcaa  
agaaccttacaaagaagatttcagatggtaagcctcgaagagagcatcacttgcttatacctatcctgtcctacttcacataaagaatttctg  
ggtatgatacaaggcttaagatggaggatcaagtgaccgttggtagcgtattcgtacgctttatcatgttaagctacatcccgaacaagct  
cgtctggaaaaactttagctcgtacttctgcaacatattctttatcaaaagcagctccgaagcacctatggagatttagagatattggctgacca  
tatggtgtccttgggacgtcaattccctgaaacagtttagcgtttctttatatctgcttggaaaggaatcgtaaatcgtttacttcaagcttcacaga  
ttctgatctcaaatccctgatacacaggatctcgtgtcttaatttagctggttcggtttccctacgtccgatagaaaacataattgtattgagcca  
atgattcttacgatgtgtaatcattgagtcacgccttgagtaacacttctgatctttaggaaactatacttggcgaatattctattgaagat  
cagcgtcttagtcacgtatatacccgaagtcacgtcttggccaagtttctctccttggcctgataaaaaaaacattcctggaac  
tttactgttctgatagcttcccggagaagcgtaaagccttgggttcaagatatactttagacgaacctcacaagttgcttaccgatttag  
catccgttctcttcaaatcttcaatcatcgatgattatgattacgctaaatattgtaacttagcacagaatttatgttaaggaaagcgcattt  
tggaaatattgaaccgatcttcttactccagcattaccaatctaagaacaattacttcataaaactttatcagaaaaggttaacacaggggtg  
agaaaaattggctacgctgctgagctgccaagaggggtcgtaaacctttagactcacaagcgcacagaccgggtgggtattgctagtcaattacc  
taagttgaagaaggttactctgacgagaacttctatgacattgacctgaaagagcagaacgtaataagcttctgctcaacaccgggatgc  
taagaaaggtgctattcgtacacttgcgaaggatgcgagatattgacgtgaaagacaaaaagaacaacgttcgaaagacaaaacatacaa  
cgagaaaaatgggcaactcacaatcgttgcagcactttagcagctgtataaaaatcgaaaaaggcaattttggaaagccgctatttcata  
gataaagtttgggatttggtaaacataggggtgtaaacataactatggattagatattaataatgtgtaaacattttcttctcagtagcgtcaa  
tggaaaggttaaaacttggtaacgtaaatgaattgagatctaggactactaagctaaccaatattaacaaaaaaagcatttca  
aacgtacgagcaactttgttctatataagatcccgttacttcatatattagacatcgactaaatcaagaactgtttagatgaaagaaca  
aaagcaaaaaggtattgggtattggtttgaatgatagacaattgcaattagaaaaatcatgagcttagcatttagtggattttcttcttccaaa  
tcttcaacgtaattcatagcaagaagggcagcttggcatcacttccagcggagttatagcttggcgataaaccttcttgaacatcgcagca  
gcaagaaacctggaatagaggtacgaggggtccgttaatagttggacataacccctcagcatccaattcgacttggccttcaacagatcgg  
agcgggaatatgaccgatagcatagaagagaccgctgacattgaggtcagaggtatcacggtaatggtgttcttcaacgaaggtattcaag  
agtttccatcaccttagcttccctggcaacaggttcaaaagaacctcaacctgggattagagagcaaacgcttggcatgatgggagaagc  
acggagcttatcacggcggacaaaacgtagaccttactgcccgtattgttaagaattgggcttctcagcggcagagtcaccaccaccgacaa  
ctgcaagaggcttgttgcggaagatggggacggcaccatcacagacagcacaagcggagataccggcttgcagatttcttaccggaaat  
atgaaggcagcgggagagggcaccagtagccaaaatgacacagtcggcggtgttgggagcaccatctcagcaccttcaaccagaactgaa  
ggggcgagaagaagatccaacttggaaatagtttcaactatgatgtagtaccgaagcgttggattgggcacggaattttcagtcaattcag  
taccattaacacctcggggaatccgggaaagtttgcacatcggtagtggtggtcagttggccaccggcggcattccgttggcaagcatacct  
cgtacatgacagggttaattcaccacgggacaagtaaatggcggcggtatgaccggcagggccagatccaataatgacaaccttggaaatgag  
aactggggactgggttagtaactagccatcacacaggggtgcaaaaagaaaaagaaaaaaagaaaggaagttcaaaagtaaaagaacagc  
aagatattcatatattaataaaaaatgaaaagtcattccttagctggtgaaaaaccttttcttctgcttaaaaaagcctccacaagaataaaatt  
ttcttttttttatttcttcaatcaagaattacttcttctgtgtttagaaaatcagtagaaatgaaccgagtggtttagtaagtggtg  
gtggtgagaaaagtttgaagagttattgaaagcagcaccacagatgagttgctacaaaaagggtattctttagttagtctctgtttatt  
aatgaaatattgagaatttggcagcaatataaagttgccaagataagggacgcttagtctttagaataagacgtagggttcgagacaccaa  
aggttttaccaagacgaagtcgataaagtcagattaggcagacaatgttctgacaaaaggagttgaatcgaaacgagccataca  
aaagagaagagaggcgaataaataaaagaagacaaaaacgaagaaaaaaaggaagagctgctgagaaaaacaaa  
aatgggaaggagtagtagagaaggtccaagagcaacttgactaaagaggaagaaatgaaattcaaaatggaagcttatgtattgatgt  
aacaataatagaaaaagaataaaaaaacaagaaaaagaaaacgaaagagtggttgaagcaacactttctattcttttcttcaaa  
aaaaagtaatagttgcgattcgaacttggctcattcatagaatacggaaattacaacgatgagacttttaacttttaacagtttacgtcgtg  
ttgcaaaaaacataatcagcgttaaaagtcgagttgctatcagaattcgtcttccctaatattcatctaggaaaaaaggaggagatccagcg  
tagaaaaagaagatagcgtatagaagtaagaatggctacgagaaaaagaatcttggaaatagccttggaaaaaacgtatggtatgataaaaa  
gaatacatataagagattgaacgaaaaacaagatcgttgaacaaggaatattctcagactagactcccgtcgcactctctatctactataa  
cacactcgaagaggaccagcgtgaggtataaccagctatgttctgttaggggtcctcctcctacaccaggattggcttgttttctatcctttg

tttttcatctcgaccaaggtttatgcattctgttttagtcattggaagcgggtccttgaagccacatcattcggaattgtgcaagcgtgaaca  
aactcggattgctgctttgatctattgaaaatgaaaagctcctcaagaagtgaacatcagttcacatgtacacaggggacttgacgaaaa  
atgaagattggatcgtgtcttttctgtttccatcccaactgtcatcactgctccccggcgcacaacttggcacgtgatattacttccaaa  
tcaacgtaagcggtagacaaaaacattatctgtcctgcaagaacatagcgtggatgctctgtgtacactagttctcgggggctgcttcaatg  
gcgctgacttgatcaatgtcaacgaagaatgccttatccgaaagtgcacatggacggttacaatgaatcaaaagcacttgcgtgagacgattgt  
ctcgagaataactcgtcctctcgaacactgccttgcgtgttgcgggttgggtcctggcaccgtcaggtcgttctggcatgctctccgtt  
tgagaaatgggtcaacaaagtttcagcttgggagaatttgaatcttttgccttacctacattgaaaacgctgctcatgctcacttgttgctatg  
gataatcttcttcaacgatcctaccgctgcggccaagtgtctttattaccaatggacaagttatctacttttgggatttcgctcgtctatctgg  
gcatgctggatgctccctcgtttattatcaagttccccgtactctaggtatggccatggccaccgctgctgaatggatttgcactttcttaga  
aaagagccaggattcactcgtttcgtgtcagtttagttgcgcaaatcgttatttggatattacaaaagctcatcaaattttaaactaccgcctatt  
tacgatttagaggaaggaatcaagcgcactctcaatggatggattctgaaaaaatcttaatatcttttgcattgtctttccgctgtaaaa  
cacttttctctgcaattctaaaccgagggttcaaccttgcacaacgcaacttctcgtctcatgactgtttttcatgccaccgtgtgctgctata  
ataaaaagcatatgattcttaacattgacattgtgtgtctgctgattgctttagaatttctcaataatcatatgatgcaccctacattcgggttagt  
tatataagaaccataaaaaggaacggttagatagcttgcattctttccatcatggctacagcgtagtagtacgataattttgctgtattatattcg  
aaaaagaactcctagaagtcgtaataaaaatggaaagctatcagcagatgaacttcatgcaacattataaaaaataaaaaactattagg  
aataaaaaaactgaagtaaggattgaattgagttagcgttcatggaatccatcctcctcatagttgactactgcataattttctcctctc  
ccatcagctcaatttaacaactcagtgaaagcgataataacagagttccgttttagaaagaaaaatgactaaagatgcattatcattgaaa  
aatgaagcaatagcgtcttaagaaggacatattgctaaagctgtagaactctattctgaggcactgaaactgatccccaaaatgccatcctt  
tattcaaatcgttcgttagctaatttaaaatggaggatttggcttctgctatcaatgatgctcaaaaagccattgagattgatccaaatttgcctaa  
agcatattatcgaagagctgctgctcatatagccctttccaacctaagaagcagtcaggactataaaaaggccgttagtaatgcccgacg  
atgctattgctcgtccaaactcgggaatgtgaaacgttattgaaaaaatccgattccaagaggccattgaagtaagtgatccccatctgctt  
agcaaatataaatctctgatattgatgttctctcactacgatggcgtcaaacctcagtgaccaaagcagagagttgtcttgaacatgtt  
ggaccgtttccaaaacggtgaaaaagctgcccctcaagatgctataccatcttaagggacattgaggaacattataaacaagtccttccggtgt  
tgatgttcaattgaaggatgatgaaaccttggatcctgtgtgacacgcatggcaatttttagatttttaaatatttcaaattatacggttatcc  
cagtcctaccaataagtaaccttttaaggtattcgtagatagaggtcctggctactgaagtcgacttactttgatgcttcaaacgttggat  
cctgattcgttttcatgaacagaggaaacatgaaactgatgatgaacaaggctcaggtttgaaaggagaatgcaaggctaaatataatga  
gagaacctcaacattttcagaaacattcaccgcgtacctctaggtactttaaattgagaatacttatttggattgcatggcgggtttgtttctaa  
tgataatgttactttggatcagcttctgtaaaatcagctcctcagcaaaagcaaccaggcaaaacaggacttatgatgaaatgctatggactg  
atccccagcctgaactaggccgtggaatttcaagcgtgtgttggcttgaatggctcctgatgtctccaagaagtttgtgaagcgaatgggtt  
gcgtgctattatccgttctcatgaagttcgggatcaaggctacgaaattgaacacgatggttactgcatcacagttttagtgcctcaactattgtg  
atactaccggaataagggagctgtcattaaagttaaaaggataggaactgatttccatcaatttcaagctgttctcatcctaataatcgccc  
gatggcctatgcgaatggactactaagtgggatgtgaaccgtgacccttaataccttgcctttcaactgttgggttcttctatcctgtat  
ggtaatttggtaacatatttaagatcattatcattttatacggagcctgtaaagatagaggatagtttttagaagactggattttattctaa  
tgggacggcttgtgtattctaatagaaataatacgttatagactattcagttcattgtggaatagacggcatttgcactctgctactctgctatga  
aacaagatcatcttttgaattgaaccttgggttaataagaatacttttttttctcgttactctgcaactgattagcttcattttgtttattg  
cttctactttccaaagtaaccaagtaaaaaaatgcgttggcggagtaataaagactcaaaataaataattcatttctcaatgtttatga  
ataataagggaaactgtacagctgttttgggttgccttgccttctgatattttatgcctttatcatagttataataagatgacgttcaaag  
tgacctcgggtgaaaaaaagaatccttcttaacatacttcccttaggaacttgaaaaaaaccatacgcagcttaaaaaaacttgccttct  
tttgcctactttgaaagctttgatacattttctcaatggcgaacgagcagattatttgcctgagcagcaagatgtaggcgatcatccg  
aatcgcgtctcatgaaactgaaaaaggtgattatattcttcttctgttcttaatggctcttgggttttttcttaatgccgttttgacaaagaa  
agtaggacccaaacaaaatcggtgatgatggctctgatggtaagttatagaaaagaaacaaaagtaggctcaatttttatgcttgcg  
aagttaaaccttctgacacttgaatgggttagaatgggaccgcttcttaccatgagtcgttcatttgcgtgactatttgggtgaaaagaa  
ttacattcttcccttgacaagcatttaattggaagttctagaacaaagtctagttcaagctcattacggacagcgtgctgggtgctaccgctttt  
cttgcgtgcaaaaagctataacggagcagtcggagtttagatgggtggcagagcgttggaaactatattagaggcagcaaaagaagctggcta  
tttaactggatggttgttaccagtagaattacggacgcaacaccagcttattctctcagcgtcgaatcgtttatgcaaagcttaattgccg  
agtatcaggtaggtatgggtccattgggacgacgacggattgatgttggaggaggcttatgctcttctcccaattcaagctatcaatcctgt  
cgttcggatgacttggacctttggagatgcgaaagacaatcaagaatttaacatactttgaaccgtactgattttgatgattcagaaaaacatc  
aactcccttggtaggattatttgcagaccatcacatggactacaatgtcgcagggatccaagagccaaccgtcttaccgaaatgggttgaat



cagctcttgatactctctatgaatcttctaagctactggaaaaggcttttcttgctcattgaaggaagtcgatcgacatggcttcacaacaat  
gatcctgttgctcatgttcacgacgtgtagagtataatagcgcttttcaaaaggcttctgattttatagaaaagactggaggcttgatctac  
ttctgaccacgaaacaggtggattaaccggttgctgacaaattactccggagatccttgatctctgtggaggccagaagtccttgacgggcca  
cccattctttgaataccttgcgagatctatcatgacccatgaagaatcagaactcgttctttatagaaaagtcgctttccagcttttaggaata  
aaaaaccagtcataagtgggtgaacagcctttatactgagatcgaatgttttgaattgatcaatcgatgagctcatcattaggaacaa  
gcgcaaattggttataccactcatggtcatacagcggtagacgtgaacgtctatggaagcggagacgcttcataacataaaaggaaatttaga  
aaacattgagattggagcatatttggaaaaatatttagggctttcttagacacgggtcacctcaaaattgactgatgctcctatctatggctacca  
gatcgtggatttaaggcagatgctttgtacatgaagtttggaaaaacatccggagatgaatattagtaactttgaagattacctaacaatcatca  
gtcaaaaacgacctaattgctgagctttagtaataattctttcaagatccggtttgctcgcatctcatgacagcgttgataattgacttttacta  
caatctgctattatattcatggctataattattctatctgaccacaacttaattacatgaaatgaactctaactattcgctctattattacttgctt  
taattattacgctgatcagcgtcctttattggcaagatacctctcctgagatacaagctataaaaataaatatttattccattcatagtggtcaatca  
agaaaaattcgattaatcagaaattgagcttcaactaatgctggtcatacttagccataactcgcaattagttgattgcccattttagattttgtt  
aatcattcaagttagacaaagattttattttatgtgaaatttcgtacatgatccccttaccttttctattttagaaatttagtgctgactcttaa  
cgtaagtcgtaaaacataacctttaccataaccccccccccccccaactgcctttatagaacacttaaaagttctgaattcattgagttttcat  
agaacttaattcgaatggatttttgcaggataacaatccgttcggggaccaaagcccaagtcgtttgctggaatctaataacatccagaaggg  
caattagcatttgcaacagaaaggaatcaaaaagaaatgatggaaatagggattggaatctaaactgagtttagaagagaaggaagga  
aatctcgttcttgaagatttcaaaatgaagaggatgatcttcccaatgctattttcataacaggcgcgtaaaagcagaacgaggggctcatgt  
tgtctacaatataaagtaaatgtaagtttcttcttttctgtacaggaatggagtagctggctgaaaagtagaaactagactaacgaactagaat  
tctgaagtacagagacgatacttgaattgcttcttaccgggtgaattcgaagattatctctacatgtctagttcctgtttgcggacaagca  
taaagtaattgattatgtgttaattatacaaaatctcagcggacaattcgttactcgaagagcgaacgattgctccaatccttttaagaaga  
gttgagtagatccaaaactggaaaatcagagatattttacaagttttgagccgactgtgtcgtggaatgatgtgtgcaatcagctccataa  
gcttgcttccaaggatttataaaagtaaccagaaaatccagcttcaaatgagaatgttgatgcctattgaaagcttccagctccttcaaac  
atctcttctgtagaattttatgacgaagaaagtcaaaactattgttactcgaagactcttgaacgggtattccataaaccttcaggagaccttt  
ctcggttcaaccggtgtttttcaatttctcaaatgctctagcctatttcaatctaggggacgacttcaatgcctttcgttatcagaatctggtgg  
actaatgaccgttttggaaaggttggacaagcaatgatcacttgcctgtcaggaatgatttcatacacggaatggtagtgatgcataga  
accactttctgagatttcaaatccgcaagagtagtcgacatattattatattctgcaagaaatttctagaacgtgctcgtgaatgattat  
tacgacggaaaaaggactacttaactattagaacgacgagaacaacaagcaagtcggttacaacaagcattcatgaaaatagcgaagttt  
tagatgctgagactcgcgatttctggaaacctcgaatgctgacccgcattagcatatagttcgggacagcaacaagatttcataaacaatcgag  
atcagccattactgtcagaaaaacaggaagcttctcgaacggttagaaaacgaacatgaagttgacgagcaagtagattccgaaacgatcca  
agaatgatcagagagttgcaaacacgcatcatcaacaagatgatgcaacctcgtagaaactctgtccttccagcttactccctcgtacagt  
tcgtgatgtgttgatcagattcggtatgcctttaaagggttaaccgacaataatgtggaacgaagcgcacaatccatggggaggacattgga  
aagtgatcatttagagaagatggcagagcttaccagtaaggtctcgtattcgtactacttctgttgatcagagtagcagcgtataaaat  
cattaccaagaggatgtcaaggggttgcaacaagattgcggatcgtatattgaatgggaggaaagaaatatactgcatggaaaaatata  
cggcaggatctgtttccaatctcctcaaatctcaaaagttgagattcctcctgatatctgaaagcttcggtgagtgattttcaataaagttat  
cacatttcaactgtacatgttatgttaagttttacacttttagttgactggttataatgtttatgttttagtgatgcttcttactcatttggtca  
ttttctgcatcaatcttcatgattcttattaagttttctcaattttaagaaatattataatttcaattgagaatgtacataatagcgtcacttg  
gaattcattgctgaaatgtaactataccaaatgtatctatacataaagctgacggtatagaagcatcatgacacagcaattaagagtatatg  
catgtataggagttattccatgagacacgagatacaaatagtagttcaatctcatcttattgattactgcatgtgcaaatggtttgagggtacgat  
gtcgtttttttttgaaactaagttattataaagaagaaagaaaaatcattgaaagctgttgagctgaagactcttacttcaatcatgaaaa  
tattcacttctgtgatagatatatgtcatcaacgattttagtgactccatgaaactggcctatttgggaaatagaattttttgttttacagttgt  
attttactagaatatataactttattgacaatttagtacctctatggatcgaatgactttttgggatttataatacattggcagtgaaattacaatc  
attacctaaaaagcaatgaggaagaggattccaaggcagttataaataaaatctctctgtactttactgtccaggttgcaattccttgcgaa  
ttggcctattactcttctgtggaggaacagttgtcgggattgtttcgagattcctatacatatagttggtgcgaacgatcatattacactgtacc  
ttcaagacatgtctataaacatctacgacctattattctgttgagacggagacaaaagatgtcacggttagccaaagtgatcgattggattca  
atccactcaagagaagcttgagcagatgcagacatgccattgaatgattcaataactcggaaaatagcaaagaggtagtagattttatacat  
ccaagaatacctcctcaaaaacgctatggtctggagtaaatatgaagaagaagcgtccaagactctcaacgaatcggctcagatctaagtct  
accagatattcgaagttgatccaaaacttaacatacaagaggcctgtcaatagagttggagtgatcagattgttttggtatgctgtacgatcca  
gtcgtgacacatgtggacatacttttgggtcctgtatcatgcaagcactgactcaatcgccccaatgcctacttgcgatcgtacttccctct

cccgtagtttggagcatgcgaaaagtcgttgataagtccttcctcaagactactaccggttcattgggtggagcggcaaaagagctgggaa  
gaggagaaggagcaagagagctggcttcttattcatatgtatggggcatatccacgtatgcctacatttctccatattttgagcttcgatatca  
catcatgataaagaaatgtttagaatcatcaaacgttttgtatggcaatgccgttgcggcctcacaatgatggtcgcaacgagcatcgtgaatt  
aaggaacgctcgaggctcagcactctttgttccagatggaacaattctcgagattatgcaagtagaaccttaattgacggccgtaacttagt  
ggaggctcgaggctcgtattctgtccgtattatcgatttctgagctgatggattttcttagagtgaattgagaagcattttgacacaccctcc  
gagctaccctttacaatttccggaaccagagtattatgatgtatgggcatttaagcaatgaagagctcgtcaatagggtcgatgattttat  
gaatgagagcgtacctaattggttgggtattcccttgattgatattaagcagaagcgcgtaactcaatttccgatcttcttacaataaca  
aatctcttctatttccgagctagagaagacaaggatccttcagggtgacaatccaaccgatcggctgggtcttctgtgtgatttggcttacaact  
tcaaaatagctgggtgacgaatcgggaagtcctgtacaattgcatagcaatcaaatcaatttggatttcaatatttggggattcgccttag  
ctttagaactggcttccaacaccttacctcgtcctacaagtttaattagaacgaatgttcatggatcagcttttcttttctttatgat  
atgacgacgtgggtccgctgttggatgaacacttattctgtatttgaataatggattatctcctatgctatttatttctcagacttcaatta  
aattttccacttgcgactacatcgctatttctgttttcttgattgttagaagatttcttaaggaatcgacatggtttacaataatccttactatta  
taccgtccatgtggcgtacatcttactgctatgtcgatgagcatgaaataatgctgtcttaattgaatgagttatgaaccacactcattatgatg  
ttgtgtctacagaatgatagatggtaaattctcggatagcacttaggccaactttggcaaaagcattctgtatattcctaaataagaggggaaa  
ggttcatagttttataatatttcttagctacctttaaataatgatgtttagcagcacaagcttttctgactaaatcaagtagctatttacttagaat  
tttagttctttaaactgtaagacgtttagttaaactttaaactgacgttcatgaaagaatcagcaactaacaataatcttcttata  
aggcagctttcactctcgttcagccattactaaacttttggagccttcaagaaaagccatggagggatacagcttacaactccttta  
actgctagatagcttctcgtgagatgctcacttgtttctcgggagaagcgtatcaatacagggagcaacttgggtgaatcttctcagcgtga  
gcaacgacttgggttgcgcaataactgatgaagcttacaacatgaaggatcatgttaaatcacagctccagagttcgaaactgcagctc  
aagaagaaaagcgtcaagacacgatgttatggcccacattacacttatggttggctgcaccagccgagccggtatcattcatttgggtgcta  
cgagttgcttgttacagacaacgccgatttatttctgtcgtgatggatggacatttggattcccaaatgggttaatgtcatccaccgcttaagcc  
aatggagcatgctatagagatattctacacttggcttaccattaccaactgctcaactacaacagtcggttaagcgtgctactcttggatt  
caggagttattgtgggatttgcgcaactcgttcgcaagaaacgacattggcttccgaggagttaaaggtacaactggtactcaggcttcttct  
tggctcttttgcggtgacctgacaaggtgaagaactcgatgatcttgttgaagctcagtggttgaacgtttatcctgtaactggtaa  
acttatgatgcaagatgacattgatgttctcaacttggcttcttctgactactgctcataaattgctactgacattcgttctcgcgaatt  
tgaaggaagtcgaggagccttcaagctggtaaatggtagcttgcctagcctacaagagaaacctatgcttgtgagcgtatttctccc  
aggctcgttacattatgaacttgattcctaactgcttcaacttttctgttcaatggctcagcgtacttggatgatagctccaaccgtcgttgcct  
tatcctgaagcttcttcttactgacagtgtaataagattcttcaaatgttatttccggtatgggtatttaccgaaggtattgaaaagcatgctc  
agagccgagcttccctcatggctactgagaatcattatggctatgacaaagcatggcgttagccgtatgaatgcatgacaaatcgtgtt  
ttatctcatcaagcagccgtgttgaaggaagaaggtggtagaataactgattgatgaacgaatcaagaataccgcttactttcacctattcat  
aatgaattggattcttgttggatcttccagtttggacgtgctcctgaacaaactgagcttttgttaataagcatgctgctgcagccatcga  
accttcaagcatatgataactgaagaaaaggtgaccttctgtataagtgatatttctcaatttctcctttttgactacatagtt  
ataattcacatcttaataatattgaattacataaaagcctaaagtaatgcaatcgttctcacaatgaaagcggcttctgtaaattt  
aaatttgagattcaagactcaagaatgcttctaaatcacgtagagacgcttctatttttgcgtttttgtagtgttacctcagcagcttctgtgga  
agtgttacacataggtatttgttggtagaatcatgattgttatgacaggtcgaagataccacagactcaataaactcttttctgcttctc  
aagatccaacgattggagcttcttaaagcctgctcaattgatcgttatgttcttcaacgatcgcgttggagaatcttcatgtgccagttgtttct  
aacagcataagcaagattctcgtgctgatgaggtcgatactcattgatcagatgatgcatgttgagtaagataactcgtatatttcaacttttg  
agggaattgctctggagcttggccatttcccaatagttctaagaaatgaagcagaaggtgataaaagctgaagttcgttaggctctcga  
ggaattatgctattaccgtcagacctggcgttggatagatttggatagactcatccttatttcaacagcagaaggttccgaaccatcagcag  
ttttattacagttccttgatcctcatttcttctgtccttcaagaatttccacttctgttggctgacttgtatcgacatccttgaattgagaggt  
ccatcatgaattgatgaaggcggcatgtccataaccatagacaatcccacttctggatcatattcactgtttctattttatcttctcgttctgta  
acccttatacaattgagtgattcaaagcttgcgaagaaggtattacatttctgagctaatccatccacaattagaatcgtccacaagcaaat  
agggaacaaatacactaccctccaagatctccaacatcatataagtcaggaagtaggacaagcaggcaccttaaaaactcgtccaggttt  
ttgtcttcttaatttccatcctcactcagcagcttatttccatcttcttataaaccttgttttaccgctcaggtttcttctgtgaaaagct  
tataatacagcggcgggtgggaaacgctgaaaacaattgtgtaccttctggcttctgcatcttctcagaaaactgcttctttaaatactattcctt  
cgtaaaaatattgaattgttaaaggcattaatagcaatgtcattactcgcacgttaactgaaagtcaacaatgctaggtgtggaacaaa  
aattaggcacaggtaatgttaacgttcaagccttctcataagacgtatacaaggttcatattcttgaaaaactcaatagagaaaacaatat  
atatatatatatattagaagaggaaatatcttccagagtaggctttcagcttctgtaaaaaattatagaatcagaggagtatcgagggtt

aatcatattacgattggctgtgaaaagtataccgatattgctacgtttcgtttgttactgttactttcaaaaaaaaaaaaaaaaaaagcaa  
gcaagtgagtgaggaaagactcaataaaaggcctaaaactggatcttaagagctcttttctatcttcaattgctcaactctgattcacattta  
tcttgttaccttttctcgatgggataaaaagaagcgaagagcgttctgggccttcttctgtttaccgttaaaactaattattatattgttt  
aatgattaatttttggatattgcaaaaggtaataactgaaaataagatttagcgaacgtccatatacaataagcaaggaaatggattgtct  
ttgaggatgttcaatccattctgtgtaaaaaataaggcaataagtatacaaatgtttaaactataatcaaaggatcgaagaaatacatcc  
gtacgaaactcccagttccagaggatagatccaattatcaacatagaaaagtgaaaaaaaaaaatacaattaatctagatacaagga  
aaaaaattatcacactttctataaattatcaaaggagttttatagagctatcataactaaatattaatgtacattttcaaacatctgattcctg  
ttccttattctactccactcttaatttagagagcaagaactaaaaatcgccatttttttttttattgattttcattcctctgaaacaact  
tctctgaaggatcatgttcatcataattatgcagccttgatctacatataaagatcatcacggatgcctcgggaccatttactgctcagttctgc  
caaacggcggcagattactgctaaacagcaaatcctaaaaactggatgcatcatacagataaaagtccttctgaaaacataggaaggact  
gaagacaagaaggatacgtcaagtaagtaagcaaaactgggaaagtaaccgcaacattaatccaccagtaaaggtaatatgtacgcagtc  
atcagttcatgaatatggggaccaccgtttacatcacgtcggacttctcttagagctctagttaaagcccggcttcttagaggatgctatgcaat  
acaggatacgaaccagcaataatctataatccagctttgcaatgcatccagttaaagagcctttataaacagcgatctaaatggtataaag  
acatacaattccaaaactgcaccagtcagataggaagaacgataatagcgaaaaaatacagtgttccaatttaacatagctgatcaaacac  
gctttacgttttctattctcgcttttgactgaatcgttaataactgtcctgtgactagtaaggaaatagattgaatagatagggaaaaccagaga  
gcaaaaaccaatgatgtatgatacaagtcagttcgaaagcagcgggaaaaattgtcttataagacacgtccgagcgataaggggaaaaat  
accaaggatacagtcgttataattgataactaaccaacagaaaaaagcaaaagcaattaatcgtttataaaagtatggtggtgcatacgcagtcgt  
atattctgagctttctcaaccttttcttttctcaggaagttgataaacctcctcgttatagggattaacatagcacctggacgaacgggaacga  
catctttgatgggcatcttagaaaacatccatcaaatattaattggctttcatatccttctttgctctctgatcatcagaatcggactcacatc  
aactacgtgtggttactgaacaatctcctaattatgatagtttctccgggataatccctctcatcctgtatcgtttaccattacataggac  
gataatcgtaaacctctacacagaatacttatcagtgagcgcgaagaaaacgcgttaagtccattggcttgaagccttaactgacatgtatt  
aaaacctgtaaagccaacaatcaatgggtgcctcaaaaacaacgggtttggttgaatttaacggaaacaccatacccgtcatcttcagaat  
gtggataacgctaccgacacatcccagatgaaactgaagtaaggattgactaaatccaattttcttaactgaagaagcatgggtttctcaa  
tatttctgaattgggtgaaattgtggatcattgggtctctcaagaagaagagaactccagggcgaacaattttcgaatcattgatataaacac  
ggcgaactcaacataaaggtataccaataaacatgcaagaaggtccagggatggatggcgcacataacataaagagagtttctaa  
agtcagttttgaaaggtccaatcaagcaaaagattcaaaaaataaccacaaaatagggaaaagtaactaatcgatagaaaatgatgcta  
aatttactatagaaccgattgacgtagaccttcgcgaaatgcaagctcagctttcgaatttgaggatccttaataagaattgttctgttca  
agtacgatattccaagggagaaaaaaactgtatccgaccatcaatgtgaagatgcatcaacaggtcgtgtagagtagtttgaacgaagtc  
cttcaataattggcaacatagagaaacagaaagacagggataaaggaaaatgtttctataaattggtttgcaacatacttatccgctgtgc  
aagaataccattgccatcactaaagaaggtagactttatcttgaagaaggtgtgcaaatgggaatactgatcgtgaagacatactgaata  
aacttgatacacaacagaattccaacgtagataccccgggagttgaaaagcaactttgacaggttaaaggcctccaagcgtccaatc  
cgaaccgtccgtaataataaccagcaaaacgctaaaacaactgtaggacgttgaacgaagaaaattgtccattccagaaaattctccagtc  
acataaggcagccaacaacaacggctaaaaacatggatacaacgaaagcagatcaaaagcaattttgcaaaaatcctaaaattggaccg  
gagaccaaggaactcaaatcccataaaagtcacggcatcatcagcatgtgcaattgagcagcagcgtgcagcagcattaacgtcctcatctg  
ctacaacttatttgtcttcataacagcattcctcagcagcagattttcaatgtcacggatattgccaataactgtggttcttctcgagcttgc  
cgactctcagagattcaggtgcatggttatctcgttttcagaatctgaagaagttggggagttcgttgaggaaatcagcagcaggttgattag  
attattgatgttatctgactcatttaaattttagaggatcgtgagaatgagggccagatccgggaatgggctgaatacattatagccatatta  
tcgattccatcaagaggcctttgaggtgcaaacgggttactcttggaaactgatcgttatccattagatcgtcatcggatttcttagcaggaacat  
taaccatggaattagcagcatcgcgaatattttcaagcaaaagcaagcagcagcagcagcaatcctcaattctaccattcggttga  
gctcttaccattgaaagttgacgctcacgcaaatgatccattacaacagcaagcctttggcgagcttctgaaactcacgcatgtttgcgagc  
agcttgggtttctcatcaaggttataaactgttgccttgaagctcatcaaccacatgaactgcattctgcaaaaaccattcacgaacaagaac  
gcagtaataagcaaatgtcacagcgaatgtagaacctgtccctgagctgtacttgaattaacatattcaatcgaggtatagatgtaacgaa  
gaaatggattcaagtaaccaggagttctttgacatggattgagtcacttgcggatgcaaaaggatataagcatctcctagcttcaatttaa  
ctcaaacatattgtaattataaaggaagtaaaatggtccaacaaaacatgcaataaaaccctagaaaataaaaagcaactcctttcatagt  
cacaacaaccttctcaaaagcaaaaaagggaatggattggggcattgtatccagtaaaactgatcgcattagtaactgtacagaggttttct  
ctaccaattatagatacacttttggtaaatctaaattgggattcaaaagctcgaatgtttcttttactgtgagtaaccattccaccagactat  
aattgacatgtttaaactgaaatccactcactatctaaatcccaaacataaccattcttgatgaacataacgaataactcctgtgcatttagccg  
tattagcctaaaggcttgaacggtttccctacataccaaggatgaaataatggtgaatcctcgggtcctcacaccgacaaaccgacaacac

tcttcatccaagttcattttgtatttgggtccaatggacaacaatacgccttaaaatgacccttataagcaagaatcgctacagatagcgggacg  
aattatggcgactgtgttgggtgaaggcaacttctgagtagatatacttttcagctcacgataacgaatccttacaagctccttattctcaa  
atggtagaataaacaataatcatattgcttaattactcagtttagtgatggtaaagctttcaagcatagaagagattgtaagaataaaaca  
aaacgtaagtagtaaatcatttctcaatctacaatgtctagctactattgaaagttgcgatttgaatgaaatgctatagtcacaggatattga  
atactccatggaaagtagaaactatgatttggatttgcataaattatcttaggatgcctatgctagaagagaattaaagctggaaactgttcag  
agaaaacatgtacaatagccatcaagatattccaaaataacaggtcactgttcaataagttaccttatatgaaatcaatcaattcaaaacttcc  
ttttattaaaaaactttaacgactaacaataactcttccctatttttccaaaaccattaattttccaggaagaagtagttaccaccagcctttt  
gttccttaccatttgacttcaagcttattgatacaggacgaagagtgtaggacacgacggaaggtacgtccaagttcctcaagaaggagt  
tcataccagtaagaagagattgaggagagttgagtgagcaatcttagaaggttcaccttcgaaaagaacaacacgatcagccaagtaagtag  
ccatgataaagtcgtgttcgacaacgaaggcagcttaccgggagttacaatgaatctcttgataaccttagaagcaatgatacgttgttcagaat  
ccaaataggcagagggttcgtaataatacatccgaggcataccaaaagccaagcagatagccacacgttgcattcaccaccagaca  
gattaaggactcttgatcgataatgctgtcaatgttcataggcttaccagactttagttggaatttggcactcaagaaagctgaacggatctcttg  
aagaataatgtcgaactgtaccctggaatttgggtgcaatagtttgggcttcatactgacctaaggtcagaagcttggccatcatttaataa  
atgtggcttaccagtaccgttttccaagcaagacaacgattttagctcagcaggaagccaccagcaccatgttaagttgaaatcacctgtt  
gaattacatgatcaggatagttgactcagcagttcttccaacaacctcatcagaagcatcagccaagcggaaactaaagcttcttacgga  
aacgcaaatttctgtaggaatattgcatccaagaaaatgtttataccttcacgaactgaataaggcaaggtacaacaccataaacggaggg  
aacaccgtagagtacacaaacaatcagaaaggtagtcacaaaatggataaatcgtgttcaacaacaataacatagtttagtagtgccaataa  
actcggatgacatgaccagccttaagacgtgtttgatatacaataagacgagggttcgtaaacatgtatacgtccgattttgagtggtc  
tgacgcaatagcaaacgctgaagctcaccaccagaagaaattggacttcagatctgcaagatgctcaaatccatgtgctcaataacttctt  
catagttgccattgggtgacgggcttcagaagtcaccgaccgtttatcgccagccttgatgacgaggaatgtggtcaacatattgaggtt  
aatcaaagccttaattgttcttcaataacttggtaaaaaagtttggagttcactaccaggaagatttgacaatttcagccaatcaggggga  
ttgtcgtatctgccaagtgggttaagcttaccagacataacctcaaacggtagattaccgataccattagtaaccaacccaacccaact  
gaccgggtcagaggtaggtaaacgatggagttgaaagtttgcggcataacgatgagtgacttctgtccaagttggtaggcaagttaatg  
atgttaatagcgcgaatggacatttctgacgcaataaccacaaccgatacataaagttcactaataaaggcgatacggctgttgggtgccac  
ttcaatacacagtttccggtacgactcagggcaagatctacggcactctgacgacatttcaacaacaacagagtttagtaggattcttcca  
aaagcaaaaagatgagggtgcaataaagaggcaatttcttcttccctgattataaactcgaagacaatttagcctcaagcctctatttca  
ttaaagatgcaggaaggcttgtttgcaaaaatgaattcaatataagatggaacaagcaattcaattcttgattccaagcgtcaaaatgattc  
aggctacaatttgaaggctttggttggagcaacaacgaacgtgaatcaaagcaaaagcttttgagatttccctcatttcttattaa  
aaacataccttggctacatttcttctgctgacaatggcgattctgtcaggcttactgctcatcgtgttgagtagtagtgctggttggtaaaa  
gaaaaataggtattggctaataagagcacagagcagcaactcgtacaagagagcgaaggaacaaaaaacgaaagaaaatttattaa  
atataatataaataagacttgaattttcagaatgaatgattccaatttctgatttgaattacttctatagcaatgctgatcagtagtattca  
caagtaagaatgcaatcattttataggtatacaaatgaacaaaagagttcttataggattcaatattaatttggtcacatgaccaatgataatt  
ttcaccaccgtagaagtagatgaaaagtataggttctaaacgatcagattcaatttctctgctggttcttctttaaaggaataactaaa  
acatgtactctttaaactttgtattgttttcttttcttcatgggtatttttagtcaaaagcaaaagtgaaacaagtttctacctgtgtaaaacagttga  
acagtttgaataactaaaagatacataataaactctgagtagtccatgctatgatcgagtagttagaagtgatctaggaacatgctcattagct  
ccaacggagaataattcctaacttctcaaggttccatgataactattatgagtagtttttagcattacaattaccaagaataatccgtctagg  
caattgtattttatccctcttgaattttcatcaaaactgtttaccctcatcattctaggtgacatattaatataatattccttagtatcatgg  
atcataagtgactattgagaaaacaaaagtaaaaatacaattttgtacgtatccattacttggtagacacattcagcaagatgacaag  
aagtgaccattagtttatacagacaatctgaccaattgattggcttgacacaagtaaaagattcttgccttcaagggagcaatatttt  
ttctcgttgaacatggatattcatttttaaaaaagaatctatccatgaattaattagtagtgggtccaatcgagatgctgtaataacagat  
agctttgggttaataaattccaattcggcatctcaggtacaaatttttctagatactataaataaataaattttataaaataaaaaactacc  
aaaaaaaaaacaagacaatttcttaccctaaaggtactgtttattttctatcattgttgaacgtgtactacacaatcatttttaagagagct  
atcatttcttctatcagtagtaacgacaacttctattcgttaattgaattgctaaaacaaggctaaaatggcgaatatttggtagcagtcacaa  
gggcatcgttagattaaatataactgaagttgcctctatcaaaaaataagaaactcgtttgggtggtattccctctttttattctttttttat  
tttttaatagaatctatattacaggatttttaatttaaaagcctttatccttaattttctccgttaagattacaccttcttctgtgaaaactct  
atcttttcttaataatagcctcaaaacttttgtttacctctgaatccgttgggtgaaggtcacctgacaagatctgcatcaaaatttctgatccat  
cttgatgctgtgaaagacgatccactttcaaaagttgatgtgaaactgctgtaagactggtatgattatggttttggtaaaatccacc  
gctccaagtcgactatcaaaaaatcattctgacactatcaagactattgggtatgacagctctgagaaggggttcgatcaaaaaactgcaatg

ttcttggccattgagcaacaatcccctgatattgctcaaggtctccactacgaaaaggcattagaagaacttggctgctggtagccaaggtattat  
gtttggttatgctccgacgagacttctgaattgctccccttgaccatttcttctgctcaccgcctaacgcccgtatgtccaaggctcgtcgtgacgg  
tacccttcttggttgcccctgacaccaagacacaagtccatcgaatacgaagaacagaatggtgctgtgttcttaagcgtgttgaccat  
tggttttctgctcaacatgctgaggagatttctaccgaagattgcttccgagatttgaacaagattgtaagactactgtccctagtcatttgtt  
ggatgctcaaactgtttatcatattcagccctctggccgttctgttgcggcggctcaaggtgatgctggcttaccggaagaaagattatcgttg  
atacctacggtggctgggggtcccacgggtgggtgcttttccggtaaggactactcaaggttgatcgtcagctgcttatgctgctcgtggat  
cgtaaatcttgggtgcccgtggttggcccgccttgcttggccaattgctctatgctatcggtgttctgagccccttccatttttgaataact  
acggtacctcctcaagtcctctgcagaactcgtagaaattatccgcaaaaacttgacctccgcccgtgttggtaggagcttccgttgcaa  
accccttctatctttccacagcttctatggtcattttaccgaccaatctaagccttgggaacaacccctaaacttaactaaacgaattgttg  
aacatattttaagctagacatctgctgtttgttatgtttgcctaatttacccttaattccttaaactagaacaaatattgtcggctcagga  
agtcgcatctatgaacaacgagttacaataatacccttttggattggcatgtattctatacaaatcctgatcgtgttgacattgaagaatct  
aattcacagcatgacattcaggtaggcacaattcaaccttgtgtctatggctccatctcgaggtgacgaggcactttaccctttagtcttgggt  
gaattctctttatcttctgtatctcttgggttagttgtttggtaatgtgctttgagactttctatgatagttgtattcgttgacctgttcaacta  
gtaggccacctgcttcaaatcaattcaataattatcatactattatagtttcaagaaagggttcttggaggttgtagagaatgaacaa  
gcaatcaagtaagtgatgttcttggctagttggaaaaagcagcacttggcaaacgggtggagagttgttttagttctattttcaaaaacaagtt  
aaacaatggtgtagtatcttttccaatgattcgaatttcacagcgaagtagcgttttcaaaaaaattgggcttcgagggggtcgaaccct  
gaccactcgacccaaacgaagtagtaccactacaccacgaagccgtcttaaattgtagaataagaaagatattatgtagctaaaacgagg  
tgtacaccaaactgaaacgagatggctagtaagtagtctcctaggggtaaatgcatgaagtagttggtatgaagaatcgaggataataaaa  
agtactgatagcttatggcctctactactgaacttggattatcgtgagattatacaataatttctcctgttatctaagcaattctatttctgta  
atgtgactacagagaacaaagagcgttcttcttcttaccatgatacagagtcgcaacgatccagtaaaaaacgtcattcaatacagtccca  
tataaataataaatttctatattttccaatttaacatttctcttcttcttcttcttcttcttcttcttcttcttcttcttcttcttcttctt  
aacgagataatcgtaaatgaataattgttttcttcttcttcttcttcttcttcttcttcttcttcttcttcttcttcttcttcttcttcttctt  
gcctgcaaacacaaaatcgagcttaaaccaacaaaagggtgatgtgataaaaagatgagttcataaacgctgttatcaaaaagggtgtgca  
gtttatgaaaagcaatccaagccagagggaggccttctttaggaatctcaggacctcagggatcggaaagagtagtctggcttcaactt  
aaaagaagcaatggaacggaaaaaaggaaaagttgttgaacatttactcgacgatttttattgacccatgaagaacaggtggcttaggc  
aatcgcatcccgacaaccattgatccaacatcgaggacttgcaggtacgcatgatgtggaactaatgaattccgtcattgatcttcaagaat  
cccaccgacactcctatagaattcattttacgacaaatccaatacaacggatagtagatcgtgaggacaagcaagtaggcaagtggttcc  
tccgaaagaggtggatcttctgtcttttgaaggatggatgggtgttttgaacccatggatccatgtatgctgtctgctgaggctcgtatcaaaaa  
tggcagcttggaaagacagctgctgtggtgaaacgaacgtagcgcgttaccacccggttttgaaaaaattgattcttcttccaattggaag  
ctcaagaaatcaaatatgtatgatggtcgtcacaagaacatacactcaagacactcattcgtacaggtatgctggatgaagaagtcgaa  
atgctcgtcaataactatgccacaatacctgtatctggaacatttccaacaaggctcatttaagccatcgttgggttggaaattgctcctag  
atgaaaatcgatggccgtcgaattcactaaacgacaagctgtgcacctaataaaaatctcgttcttttcttcttcttcttcttcttcttcttctt  
tttaataaataatgatctactcaacggtaagggaacataagaaaaaaggatgaatatcgctcacacaccagggttcttcaaccttcc  
gcctagccttacaattaaacatgaatgaaaggaggggggtttagctacctaataacgtgaaaacgacgcttttcttcttcttcttcttcttctt  
ttgttttttttggttattttttttaaaaaataaatagcttcaattacagaattacatatttgcatttcttcttcttcttcttcttcttcttctt  
acaacgaagcttcttagagttcgtaagttgtttgttctttatctttagaatgcctcgaaaagttagatgatgagtcgaacataa  
ttgcttaagatacgtaaagaagcctattttaggataggaatatttaagggtgagttttaaataagatttaacgatatttatgcaactaagatct  
tacgcttaaaatttctgacactatcaagttcagctattatggagacatagatgctcgaactcaaccaaagaaagaaatggatcagctttacagg  
tggcatatacataatccagcgcaaaaaatacacaacatgatatttttttcttaataactataaattaagatttctattgtatgttctaaatg  
gcgtgaggtctcagaccattttacgttggctgtttactaccttatatacatagagagctacccttgcgaaggcttggctcgtattcctac  
cgttaacaacattaacagaagggttgggtcgttagaatcgtttagtagataaaaaaagggtgtaaaaaagtaataaagttgacagaaa  
tacgagagtgcttgaacttgcgtcctggtgattgttttggctggttaattatctgaaaatgaacgctactacggatgctattataggcgg  
cggcttcaagctgtctcaacaatcaacaactgcaccccgaattaaacttttgcacaattatggatgagttactacaaatggttcgacaa  
cgatgtgggtgcaactggttgatgtctttatcctcatgaagtagtcttcttggctgctgtatccctggatgatcatcgtctcctttttcc  
gtcgtggaaaattcaacctaataaaggctcccctcttctgctgaacaatgggagtgtagctgattggttcttcttctcactttaccgttgagcttctc  
aaatttggctttcgtatctatgtgtgctatgtttggcctatccactgcagtccttcccttccatcactaaaattgcttggcagctcgcatcttttc  
tttctagaagacacttggcattactgggtcaccgcttttccattatggcttctatctgcattattcaaggttaccaccgctacagtgccccg  
tttggctctctgctgaatgatgcacccccctggaaattgtgggtccttgggtccgggtaccgtcgttcttcttaattgtggtgttattatactcatgact

tacacttggctcactatgtatatttggatcatgttactgtctttccaagctgtagactctcactctgggtatgacttcccctggcttgaacaaagttt  
gccatattgggctggtgctgaacatcacgactaccatcatatggcttcaaggacaattattctagtcttccgctgggtgggattctgtcttcacac  
tgacaagaatttccacctaacaaggctcgcaaggtgagagtgagcgcacaaagaaatccacttaaaatcgatcaagcaatgtatcctcag  
cttctgtgttgggactgtgtttctataatgaatctggttatcataatgaacactcttatttcttttggcattgttcttccggttggctta  
catcctcaatttcttcttttccgccatttgattgaattgtttagctactcttactgtcttctggttcagtcaccatttggcatgtctatatttctt  
ccttgggtgtttcatttgggttttcttaatttccaagcacttttccatacttattatcgttagaaagtacaatgccatgatagctttctat  
gaattcttgcataatttcaagttcacaatcggtttaggtgttacttttgcctgatgtaggattttagtttctttagtttaatacatt  
cgttcgattcctacttctataatctggctgtaagaagattgtagtaagaggtgcgattgtatattgactatgcagctacagaaaggtgtagac  
gttccataaagctgttggtaaccggtgtaaattgttttgggttccatcataagtttccattgatcttaataatagaaaagctaaaggagatt  
aactaaatcagctgtgtgtaataaacataactattttacaatttttactgttcaacagaaatattaacataacatactgtcgttctgactg  
ctgaagaagctagatggaaaacccgtaaggaatgaagagaatcaaaaaaagcgaaaacaggttcaatagaagaacaaaggtgtcta  
cggcttccatttcatcgttcatgtagctatttccggagatagaaaaatcagccgtatataaagccgtgttccatcagtcatttaagaca  
gttgaaacggtcacttgggaaaagcttgcgagtgaggaacccacattttaaagcgcgctgcgaggtttagcttcaactgcttggcc  
atacttctgggataaaacaacaagcaggatcaaatctcaataaagttcattgtataggtgggttggattgaacgctatcacagttgatg  
agatccatttactccggtatttccaggggtccagatacctattataagcgtctttaggcttaaaaaggtcgttaggagacctccacaacagtt  
ccgcaaaagagatgtgtgaatgcgaacacagctgtcattgacgtgaatgaggtgataaacagctctgtctaatgaagaagaagcttctgcta  
tatccaaacttgaactgtatcgtacaagagtgattggtgtacacaacatgccttgcctagacaaagcagctcatatcttactgttctggctg  
ctcagcaagaggacgctcattgtaaatttcatgcaggagtttggaggaatcttaacactaaaaatagctacttccgagctagttaccggttag  
ccattcccttccagcgttgcgattgaaaagctagcaatcagctgtgcgagacatttcaaatctgggatactgcctgagctgtcttca  
ttaaaaaagaaatattattacagatgcaaacccagaagagatcattatgacagttggaagaccattttatgacaatttgtaccactatgg  
ttcataaaaggattatgggaagtccagctcggccaagcttatcattgcaagatttccgagtgagcttctctatggaacggatgactactttg  
tgaaagccggcggctcacctgagctcagattatcactatcttttcaattctataaggtccatgttcagccaagaatgattgaataccttaaga  
gtcagctaccttcaacatcgttccgcttccactactcagatataccaggaagcagtagctatcacagaaatttgcctatatttcaaatcgtc  
tgcttctgatttggacttcccaaagtaatcctgaggacgaatcctattgattttactattgcctaagtcgctttagcatgatgcggtgattttct  
gaattaggcagtttctctgcttctttaaaggttcttaccttagcactctacttttttacttcatgataagaatattaatggtaatttaag  
atcttggcaagctaaacagtgagaactatgaagtttcaatcggtaatcgaattagaagagatgctatgaacagcaccttgcgagcact  
cgtaccttgacattctattgagacatcacacttgatagttcataatacctacctattgtatagaaaatcttttcatgtactagaggataaagaa  
atgaaagggcttaataaaatgtaatacaattttcttaatttctgtcctatttttcatcacactatattttctagtcagaatttggagtagcttctg  
ttaataaagcttatttagcactatggaataaagctaccaccaacttttcttcttcttcaaatcatgaaaaacgaaattcgttcttctacatt  
gttgttggcttgaatctacttctcttatttggtagaaagatccttttccggtttagcttcttggtaaatgtctgcagctaatctgcaact  
tgaatttctgattgtgataattctataatggagcaagtaagatgaagcctgaccttggtaaatgagcgtctaacctcgattagaattt  
cacggaaagacttacaacagcaaaaagaagagccagaagtagaggaatcatcagaggctgtagcaaatctatcgaaggcttcaagtg  
ttttgatttgcggtcagcctcagctgtagaagagagcttctgccaatactctggaaaatgtagaaagcaatttctgaagcaagctcag  
aaaacgaggacgagaacgttctttaaactgttttccgatataatacctatcctgaacgataaggaagtattgtcaaccagggttagaccgg  
ttgaatattatattgagctagctgttcttataactttttagtaataatgaccgattagagactcatctgagcgaacagctcctcatcgc  
tagtgttttcaattgagcaactatgaaggctaaagcagctatgggtaagtaaatagttcgtatagcattataaaggaaggagttataaaa  
aaaatattatgctacttcaattgataactatcagcactatgatagcctggatgcaaaaagcctcataaggttgaataattaagatcgatgatga  
aaaaagaaccgtcggtaggagaccgagtaagaaaaggagaatcgaatgaaaattttaaagagaaagaaagcaggacaaattgaggaa  
aacggcatttcaaaagaaagggtttgcagcaaaaatcaattctcgacaaatcctaattggcaacggaacgcaagtttaaatattacca  
ttttagctggacttggtagttaaataatagggcactgctaatgctcatataaaaaggacataattcaaaaataaagaatcactcattaa  
ttgcttgttccataattaagggccttttctcagaaggttctgaataaaggcgttcaaaagggagggttctgaaggcttctgattgtttct  
ctctctctgcttcttgcggtctatcaatgaaaccgttgggtgaaccgatagaaacactgttcagcgaaccaaattgttggctcaaggcaattt  
tctgagagttcattaaagtactcaatacctcgtcgaatgatgctgtctgatttagcaagacttccaggtgtctttagcaatagcataagcaaaa  
aaaatagataatcataagaaaggttaatttgaagaaagcagctccaaagctcaaaagtatttccagctcaaatcgcgttgaataataggt  
aacatacggaaaaagcaaaaacaaattgatgaatcagtttttcaagtgtagatttcttccatcaactggattgttgcgtaacgtt  
ccagctggcgttcataccagattgatctgcgagaaaattgaatgaagcgttccattaatcctaccattcccagaaggccagagcattgtcac  
caaaagtaacgtaaatgggtccaaaagatccgacatccctgtacatagcccaattctgtgtcatattcattataaggttaggagcagcttctcat  
catttccatattgaaatagtagctgtaaaaggtgactgaggatcaggatgaggttaagcttcttcttggaaatactcatgctgtctatcagttcgg

gaacatcttttcaatcctgttctctgttctatgaatgatcgatcattaatgtcgggttatcttctgaccatcttctgcttcaatctaataattca  
tcttgaagactaagataaataagccttgcgttctttcagtggaatcccaagggtaaatagaaagtaagaaaggccatacttcttctaagtgaa  
ggaacaacgcctcctgtaaaaatcattccaagtaaagtctcgacattcactattagtttccctcactattaaatgaagacttcattgttctacagt  
gagtggtcacctcgtttcacgctcatcgaaataaaccaactcaaaaggcccaaggatgaatccttctctgctgttgctcagaccacaaacc  
ggcggcctcagacgaagcatttgtgctgttattcagaattttctacaacaccagctgccatttagcaaggaagatgagcaggggatcatattct  
tcagtaagctttgagccgcttgcattcaataaaaactgaacttctcgtgggaaatgcggaagcaacgatttcttactttgtgatccattagttt  
gtccacttcagattttccataatttgaactcgaactaaactcgtctagaacggtaaacgataaatcttcaaagcacggcgggaagggttagaaa  
ggattgagatttttggagaaggagaagattcattagatcgttgccttagacgacgtgccagaatgcgcaaagtcattggattgaaaagcaagcg  
tgtcttcagggcttgattgactagatacaattgtggtcatgtgtcgaattttccaggttaacgtacttttcaagtgcataataagatgtgtgcctc  
ccaaaagatgtcggcagcttcatcaaaaggatcaaatgatctttgttatgcgtcgactacattcaatagtgctggaacattcatcatgaaa  
gaataaagggtgtaaaactttcgcgctgttctgtagattaatgacaatgctgccataattccagccgtatttagggggacgaaatattatagagta  
tatactattaaacggactgagaacgagtaacttagatgttcaggaatttccactagttgtttgatattgcttccaatgacgtttcagccgttcgga  
atataatataatcttggacgtgatcttaaaaatgaatccgggaccacgacagaagtatgctgttgcagtcattggagtccttaggttggttct  
tgttttgagagagacaagatcccgatatttcttcaatttttggaggtaggatgaatgcaaaacttgcctttggaaaatagcaatgcgactttg  
atztatcaattcgaatgtccaccgtgctgttcaacttctgccatttctggaatgctgaattgcttaattcagacattcagttccaaggaacaatc  
tgttttatattcaatataaaacttctataataaactgttaattcgtttacaatcatagagatatgagtttctcaggttcagaaatggtgtctgagag  
gtgcagtagatgtagcagtggtcacattaagctaaatgaattataaaaggattacaaggaaaactttatacatgactaaatggataaagtttttc  
tttaaaactactcaaatatgaatcgtgtaagaaacaaaggataagcttcttagcatctttgatcattttagactaacataagcttagattactttc  
gatttattagtaaggcttaattcaatttcttttgggtataaagcgtcgttaacttttccgtgattcttattcacaactatcatttggatgcataattg  
gcaaaataaatcatgaagaaagctgaatcatcgatatatagttcgaaaatagggcatatatacacaattttattgttttctactctgca  
caatgattttttctccatgtctgagaaatttggaagaaagcagatagcagctgaacagagattcaaaagtccttgcctccacacatctctgcat  
gaatgcatagagagcatcggattaccaagatcaagcgtaggaataaccagtcattgcagccagttgggaccaattgtactaccacatggcgaat  
catttcgagccacaaaaacttgacaggagcttggataactgagcagctcgtttagaattgttataacatgagagttagtcataacctttgatt  
agcattgaccttgagcacggttcttttaagactcgggagaattatggactcgtacttggagcataattgggggtgacggcgtgtgccaatca  
gcagaacaagaaagctggttctatacatcggtagaaatttcagtgcttccgcaaaactttagtactgaaagaagaaggttcttcagc  
accttgagcggaaacagaaccaatttctcgtgatcaaaagaagcaacaacagatgcagtcacgttttctaaagattgtctgacagagagc  
taatcaatgaacgagaagcactaaatgtcataacctggttgcaggcgtggagagaaaaaaacttctcatgaatacctccaaggcagctttc  
tcaatcgcctcaaaatcagctcaaaagcaacaatactttcgggtgatacttccgtgccgatttcacgagatatgagtgagacaaagctggatg  
atgagctttctcctgtttcgaatgtttccttcttcgacaactcattttcaagaccaatgaagggcgtaaattctgtctccaagttaaaagaaagg  
atgcattagcagtagcttcaaatgaatagccaatgtcgggatacggagaaggggtcgatcgatatgcacattgttgttacaatacggccgtct  
ttttcttaccattacagcagcagccaaagaaagatctcgatcgaaccagctatgccagattccaccaccatactgttccactcccacttgcatat  
atccattgcagattttcagacttgggttcaagcgaagtaggtgaatccgtgtgagtagcaacaatggaaaaaccattacctaacagatatt  
gttaataaccattcatcacatattgtcatatgaaattgtacctggtttccattttcccaaacactgaaagcaacaataactagattgattacgaaca  
acataataagactttcgttccaacaaagagccaaagtctgttctcactgaggtattggaagccatgcgacttatagtagtctgccaagttttt  
tacaacatgataaggagtagggcttgcatcaaaattttaaaactccagtgctcgatttttagctgttgcggctattttcgtataattgcatta  
gcttcagtgatgctcagcttgaagagggttaagtaattagatcgaaaataactagcttaattcaagtttcagatagccatataatagcgaattcat  
tatggctttatctttatgaaaatgtatataagaattcaatgcctttgtatatcttagtcttagcaagaggaaagttcagaagctatagatt  
agtaacatagtggtcagagaaataaataatagatataaaaaatgatcaatccaaaaggatatttctcaattttctcgcagagataaactata  
acaacataaatactgaaacagatcatcatttaccaaatcttcaaatcacatagcttgaagacatacaaaaagttaaacaataaattcaaag  
aaaacgtagaagatagtcacatggtaatacaaacctaggcaattgtagtcttcaacatcttcaaaactactactattcagcaacttttt  
ggtcactttcaacaaatcagtaattaataagatattatgaatttaaacctctagcttcccttttaacagaagggtgatctccgaaatttttcca  
tcaagagcagcaaaaacaataccaaggcgtctttgaaagacaggtgagaataactagactgttaatacaagactccttgcaagtgaagaa  
caggatgaataacagcttcaatcttgggatcaagcacattaatgctcaaaacaaatttggcgtatgactccaaacgcttggaaagaagctcgtc  
tcaacgatgtcacaataagcagatgataagcaaatgtaagtagaagaagactactgcattgttctagattgacgcagttggcaaggtacaat  
caccttgaaccttcaatagaggagatgtacaccactaaatctatgttagaaggattaaattattcaatttctggaatcatacctctgataacg  
cttcacgaattgaacctgttcaattaattgtgaaatttttcatcttcagtttctgtttgtgtcatcggcttctcggcaacttcagcgtttgatggt  
ccggttgagttgattctcagctacatcagctgggagagggtttcttattatcaggttttagttcttattgaattcttcttcttcttcttca  
agtctttcatttccaaagactcaaccttagctattaatgagttatgcaaccttcaaaatttttacatggctgttagctgttaaattgcttatcaga

ttcagtttgactcaatcacgctattcgtgagactttgaatatccaaaagagcattttgtgttccgaaatcagaacgcatactctcatcataac  
ttttcattcttattccagtgcatctcgaaagtacccaaaatgatctttcatggcctttcaacaaattcatgaattcccctgtaactgcattcttgat  
tgcttggtcaacaacggattctaggatctttccagatctttcagtaagagtactagaaacagcagataatacagcattgaaatgattttctgggtt  
gctttgtaatttacaatcaactgttttaactcttcgctacacaaaagtagtaaaagaataataataaaaactttcggaaacttacagttcttttg  
aacattttgtctaaagagccaagagcgcctgaaatgatatttcaacatggaatatcaataggtccaggtgcaatgatgaaggctctgattg  
agagggatggtttatgtttcgctcatgctatcaccttctttcttttagagaaaacagaagttgagatctgggagtagtacttacgcccga  
tgctgactgagagggggacgttgggacgttcaccagaaaccacaccgacgtcagctcccagttcttttactttcgagtggggcaattc  
atcagtttttttcaacctggaatattggtatacaataatctgctatcccttggtggtactaacaacaatgcaatactttcaggatcactgagtaa  
cttacaagaagtaagctaacacaagcagcatcatcaacttctggcagctacgtacgaaaattttgcatcggattgactggctggctgcccgt  
aacagatgatgaaatcaagtcgtaagttgaaggaaagtctttgacttcagaatcggctctctcttttagagaaaaggaagaagaagattgtgttg  
aaggggattaccaaccagtaattgtttacgatcatgatcaactgacaattgtgaaaaggaagtagtggctcaggtttgaaggactgctaaat  
cggaaattttggataacttcttcgcatagatatcaaaaactgtaataagttggttcaaacatagaccagattaataacgactattattagtc  
cgggagtagaaatgaatctaaattaattggcttcttaacaccttcaggttaccagttccgttcggttgtaaaggtagcaacaggcgtaacatc  
tgatggcttcggctgatcttccatagaggtaggaacgaataaggaactggatacacctttataagtcgctctttatcaacggtagcgaatacagt  
accatcagcagaaaagtcatattcttggcctaattccggtatcgatgagaaagcaaggcaactgctgaataacactgatggatctgaaattg  
ggaaaggaacgtttgacaaagatctaagtaaaagaaataatgtttgcttaaagcgacggcaaaaaaccgagaagaattgggataccagt  
ggaatcgagacttaataggtccgataatgactgagcaccagaaagttgaaagataatattggaagaagcagtgccatgtcaatagagtaga  
tgatgacttgccagtggtatcaatgacctcaagcaggttgtaattgtttggatcatgccccaaacgactgacacaaatttataggagacgtat  
tgttaataagaagattttccagtagaaatttcgatgacacgaacataggttcgtagttaaggagtaagcaatatagtccttgttagatgaat  
taactgattatcttgggcatcacaatcacgctcgacctggcgtatgcaaacaccgattagaaagggaaaggagtggtccgaaaagaatcagga  
gtaatggttagttcccaacaaagtcaccagaatcagggttatcgatgcaaaagagaccgctacttctgctcattcgacacttgggaggacggct  
agaagtgctagaatcttttctaatttgaagaggatgggacatcagaagaaaaggaggatgatgagttactgagatgcttgggatccgaggatt  
cggaaagggaccgtcatgctggtactggcggctgatgctagactgggattcataggtgtctctgggtggaagaaaggggagagaggaagcacc  
cttattagagttgtcacgatcgccagaagacaggagcatgcttctaggtcagaagcagacatggcgtttccggattgtgagaagggcttgagg  
gcttgcaaaaaacgagcgttgaatatcaaaagttgtgctgctaggtatttagacgatggagcagattgggcttctgactaccatcaggcttat  
tgtttgtccttcacgtagagcctgaagaagggcgtcagcattgtgtgaggtagaggcattttgaaacgaagttgaaggtggaggtgaaggtga  
tgttgaagctatcagcgcaaaagttaaaaagattcagtaatttagccgctggtcttctgctcctgttctgttgcggctcagcgggttgaata  
gtcggcagaggtagaagttactccatagggaggaggagaacgagcattggttagcggcaggagattcatttctggaggatgacgatgaaatggtt  
gagttcccaatttaagttttctgtagaatttaaaatcgtcctgatgcttcatgatgaaagagcacagagtcagcttctgcttcttaaggaa  
aaagagctacttattttgtaaataagtaagaaagataaaaaataaaaagtgtaaggtaaatatcgaatctgtacaaaagcaactgactctc  
tgcccaatgcttcaacaaaaaggatcgtagaaggtagaagtgctctgcacaatccctcgcaaatgggtagatcgtcacttcacaacacca  
cttctttagtaacaagaaaaaggaacataaacaatgaaaaaattccgtacagaagtagaaaatgtcacacttccctttagattgatgctct  
cgctaccaaaattgtatattcaagatcaagaatggattaaaaattttgatgaaacaaatcagtaaccttctgtagtttaagagagatctac  
gaaggtatgatggaaaacccgtagcctgaattgaaaagtaaaaattacagacaaatcacaacatctccattcgatgggaattgaagattag  
acattgattatcttcaattggtttataatgctgcttccatccataccaacaagcaattttgagagaaggcaaaaggaagacagcaaaagttatt  
tctttatggatttctatgaaactataaaacatagattgattcgtggaaagagtcctgttcgagaaagcaatctgtgacctgtcattgctgtg  
aattgtgcatgtcattcgttttcatctgatatggaagttgatattctataccaatttcatctgtgagctgttggttatcaaggagtcacaatatt  
actgcttctgaatccttcttccaggaaacagctttgaaagcttagcaatccaaatccaaaccattttccacaattatccccactgtctgtttac  
aatggacaaatttctaagtaacatgcatattaggacttgattcaatagactttagagaattcttatctgtgcttctgatggaaaaataaac  
gaatggttgaattgctccagcttctgcaaatcattttgcaaatcgaagttattgggattacaaaaaaataaaaaggaaaaactctattcctaag  
aaaaaagaaaaaacgaacagtaacatcaatggcaataaaaaaatcataaagatgaaatgtttcatggaggattcttcaagaaacgattttt  
cttatgatgctggataatagacatttgttttcttattgtttgtctctcgttcatcatcactctaatgtttatcaacaccattccattctactgtac  
ctcactgtctataccaaaagatgttgaattcatttgtttgtctgtttgtttggttagttaaagatagtggtgctttaaagttgttttgataactat  
gcaaatgtttaacggcttcttaacaaactaaaaatctctgtgcacctccctattttagaatgcatacacctgatgatgagctaacaagaatct  
aattcaagctcgcaacctctatagccatactggtctagttctgtgaaagaatcgttgcgacttccgttgtttgtttccattttgacgtagctgtag  
tctcatttgttacaattgatctgctgtcttgaattccatcatctttgagatgaaacggaacgctgcttctgctgacgtctctcgcgagttgg  
aggcggcaaaaggtgcttggctatgatggctggcttccctctattatgtattttatgggcaagtgcaagtaacaatggcaatttcttcaac  
ccttctctatacacttagcggattatgtgagttcttcaacatcgaaactatattgctattggcgttatcttagcagatacggcatcactattt



tttgacattgtcattaccaaggcatctttacgtgactctccctggagtagcaccctggctctccttgaacatcgaataatgcctctctcc  
cttatctgtgtaatgctgtttggctctttatactaccattgtcatcctcgctgctcttactactaatgttttcgcatcaccacatcttgaccaat  
ttggaccctcatgagtggtgctattattagttcctcatcattaccttgaccttgatttgggctctctcttttggtagaggctctcgacaaacca  
catgactgtctggtaatcccattatgattactttatgggtgctagtcttaaccccgtatcggaagctcttggaactgaaagatgtctttgaggtc  
cgattccttgggtcatcctttctccttccgtcgcgtcggcgttcgcaattgagaactatggctatgtagtccccaaatcctctcgtttgttt  
gcccattattgtatgccaatgcttgcgcaagggtgaggaactcattgttctactcgggatggcctatgagaaatcggtttatgcttattttc  
tggaaatggctggtaagttttctgtttatcccattttaccagttcttttcttttgttttcttactaatgctcattttcgtaggtgtccttta  
cttatagccattgactctcttttggctgcacgtaatcccaacaatacgaatggcttagctcttacaatattgctatctatgattattgattgtg  
ctattatgctttgatactgttaacagtcaaaagaaccggttcgtaatacaattcatggttgactactaccgtaaatcatttccccaaactcccttg  
gcaaacattaagaatcccactttattcgtgtgccaatgggtgacctgttgacccgggtggtagcctgtaaaaatcattacaccg  
tcgacttttccagtctcttttgggctatgattaccggctctcctcactcttcttacttttaccctgtttcttctaatcgttttgggtgcaccgtgtt  
agccgcgataccaaaagtcaaaagcgaagtatggactgactttgatgaatactgccgtatttgccttatctttcattcctgtatgtagctttgat  
acccttgggtgatcaatccttactaaccttgtctagtactgtctttaaagaaaaaaaactgttgacatgtttttgtttacatgcttttagtattctg  
ctgtttataaaggccaattgatttctgttttgtctttaaattgctaagctattctatcatacgaagactaacgctgctgttttctgttaaaaaatc  
atgaatctttataagattttacgacagtgggtatgaacgggttacattgaaaaatcactgtatcttttaagtagcaaaagacagctagttgtatc  
tttactgttttctgtgactgactagtttgcggaagattgctaggtcgttgagtataaaacctgcctaaccgggctgtaaaacagctatcgcaatc  
catcaaatctcttttaccacaattcattttcatctttcattcttttgacataactacatactctttaaactaatatatacagcacaattaata  
atccaaccatttgaggggtggcttactcgtatgtttaccaaaatgtaccacccttaccggaataagatctaaagattgaaggggtcagctatctc  
aaaccagtccaaccacattaacaacgaaataaaaaatatttataaaacaataatggatgaccgatgaaaaatgagcgtatttgtatattaac  
ctacgaatagtctttcgggtgttaaagttgctcctgaatgcttgaagcctccaagaactcaagtaggcaagaacctcgttacattgtcttca  
aaatgaatgatgcaagagtaagttatcataagtaaacgatgattgaacgtatagctcctcgggaggcaaacggtattgtttgtcttctgtt  
tgaggtcattccatagcaggttagcaggcatcgagcagttgatataagatgaatattgcagaagctaacctaattaagctgagattgtttgtg  
ataaaaagagcaccgaaaaggactatgacacttcccttgggtgaattcccagcaagactgccgttatgccgtctatgactttgagtataacttgg  
gcgaaggtcctcgaacaagattgtttcatcagttggctcctgatgtctcctccatcaaatccaagatggttactcttctccaaggatactctcc  
gccgtgcctcactggtattactactgacattcaaggcactgattttccgaggtttccatgaaactgttggaaaaggttactcgtaagtaagct  
aatcatatgactttcttctacttttggctgtcttttttctcctcagtcctcagttgcatgagagtctgtccgtttgtttatatacctccta  
aattttgacgctccttgaatgacttttacgctgtagaaatcgttatcatgtcacgaattgacgttgcaagcttcttctcgttcttcttctgtcgt  
ttcctccttttgtgaaaaagctatactcgggcttcttcttcaatgatatacgtaaatacagacttactgatcccatgggtaagatcttcttctt  
attttctttaaagattatgctattgatgtcgaagacataaagctatttaactccaagtttgggttttgaagaaagtagccgatacttatgcaacta  
gttactcgtatgaatgaatgaaagaaagtttagccatttagtgaactctcaaagttgttcttagtctcctatgatttctgtggaagttatttc  
tttctcctcacagtttatgattttatgtattttactcactaaagtaattgttctgaacaccattagctagtagcaagcacataaactgaggaaa  
aggtaaatccttctcaaggctctttatagctgtttaaaaggaatatagtttgtaacgaactacatgaaaccactataatgttgaccaac  
gagagcactgtagatctttaaagatgcataatacttacacatccaggaagaaaaacaagatgtagaaatggcaaaaaatgaatgttacg  
tgtcatttgtttacgaaaatcctttcatttttgtgaataaactgaaagttgttatttcagtttttagaccaaaatccttctgtgctcggttttta  
cgttagattatatacctaagaatcttctgattttgtcattggttcatgatgaagttattctgtagtgtttcgggtcctcattacgtttccatcaac  
taactcccttctaaatcttataacggtttaccgtaagaagttgattccaaaccaattttaatacttgaattgatttattcttataaactgc  
atagcaggaggctactaaatcttctaaaggattgtggaattgtaagcgattaacaagtaactaagcaatccaagaaggaagaaatacaaaa  
catagcactctgattgttgagagattgtattggcatgcaaggttcttaacaaggtccattcaaacgatgtctcgaataatctgaccttcagta  
agctcaactttacggcgaactaacgcctgatccagctgttccaactgttgatgcatgaaagatcgagtgatgacatgttacacataccgcgc  
aaagttagaatgggtcctgttccatatagtatccatctatgagagcgaatacaagattactagcttatagcccttctgtatgcgttcttgg  
gttagatgaaagtgaagcagaacggaagctttcagaagctagttgtgggaacgaatattgatgttgacaaatgttgccttgggtcacaatgcta  
cggaggatatcaattgtatgttttttagcctttagaaaaatcattgttcaaactgttacctttgttttagtggtagctgggcccagttgggtgat  
ggacgagttgtccttatgtgaattaaccaaccggaaccaaagagcgttatgagatacaagtaaaaggagttggcgtacccttactctcg  
atgtctgatgaaaggcggtagtacgctctagattcgcgaatatttgtcgtgtaaggtacgtgggtgaaccgaatctcctttgtctggagcta  
actgataatcaaaacagctttatgctctcaatataccgactacaagagcattggctatataccaccttgatgggtgcaccgcaatgcgtgaaa  
cggttgaacctgtgcgattgtctgtcgcagcttctggatacggattgggacattgatcttccaggagttgaggacgcttgatacaac  
gcgcaaatggctgattattgttggaccatgactcacagaagacttcaagggcagggattggaaatcgctatgagcagcttttgcgtgatgtt  
gctatccgaaacccaagtgtgtgctaaatggcaagtataggattcatgaatgggttttgaatacagacaataccagatatttgggggttatcta

tcgatttggcctttcagtttatggatactataatccctcatttacaccaaccacgatgatcttttgcgttattcatatcagcgacaaccatc  
tatcattatgggaactggcaaaagctagcttcagcttctagagctcataggtgcaagagaccgagtagatgccagtatatggaaaatct  
acattcttctcagaattgctcggaggcccatgaatatacactgcaagcgtttgaaaatcgcctaaagagttttatcaatcgttcgggaagac  
tattttagttaatgacagctcgttagggctacgtgatggctctactagtcgaaaacatgtcattgatgcttgcacattttagaaaaccacgatt  
agattatccaaactcttttattcttgacaagaatgaaagtgagaaactgtagtcaatcatctgcggaacaattgtttgattctgcgccggt  
agcttaataaaaaacaatccccgatttctaacgaagctgttcagaagttcaaggatggctggacgctaccatcaattatctactgaggtccct  
gaggctacaaggtaaataatgaaatctgtaaaccctcattcaccttgagaactgggtcctcgaagaagtaacaaaaaacctacgagg  
gtgattatgacctgttcataaagtcgcaagatgaccgcttctcttttgaggattcatggggatttccaaaagacttggaggattcttattgttag  
gtacaggccctacgaagagcaaatcaatgcttctgctccagtaagccattgagttgtacgtttgagttttacatgaaaataatgaaataat  
aatttcttttagtttgcgctacctaactatttctcttttattagctttacgcttctggtattatacagcttatgagtaacttaacaaaacatt  
gaggttcatcaaaaacattattattaataaaaatttattcataagtataaatttgcctcaatattgaaaagataaaccttttagtactcaaacctc  
tgcttctgcatgctaaatccgaccactagtaatccagaataattgggatagcacagagactattgttaccattgcaaatgctaaactaaacata  
atacaaggctctttctttgagcaatgaggttcaaaaagaattagcaatctataaccctactcgtaaagcaaacgcagtaaatggatctca  
aatgctaaatactcaaatgttaggggtgtacagtcgctggcaaaaattgggaaatttgttggtctacgactgatgccagaacagtaaat  
attattataccggatttctgaatgacacaggtgtggcgtatgtttattgagtagtgcgttctgctaaacaaacagagtttggaaagtgga  
agtttcaattaagtgaaatgggttgccttattgattcaggaaactatattgagattatgtgttcaagtaatgcggaatgtaataatgag  
agatacctgtcgaacactttatagagcactacgttctgcggcaaatgcgagcgttctacaatacgcctttccaagaaaaataatcaaccctgt  
tatcattgtctacaactggagcggagctgcatttgggtctaatgctgtgacacataaacctccgattcagttttatctcattcatatgtctctgta  
ttaaagagcctacggctcctgaaccagattgcatatattctttccaagcctaaatattacgacaagtgccgataaatacaaaaatgctcgg  
atcgagtgattatttgcgcaacatgtctggagaactacagcttctgtctgaccccagcagcgaagtaactactagatggaagaccttgaa  
aaccagagctggatcctcacaagtggaggatgtaagtaggcatccctctcaaacctgaaaccctaaagaatttgcacatgctggcttgatgc  
gaaagatttagtaaatgcttctgatttctagtgtagtagaagattatagcatgtaagtgcgcttctgctgatgagaatttactcattcactaag  
gcgtttataactaataaattaggttctgcgaagggcatgcacttcttattatgtgtacattacggatcctgaagatgagcacaccgctgtgctta  
cttactatattagtagtattgtagtctttatgaaatcatgaagtgtattttttgagatatactaggaataaaaatgttgaatcatttctg  
gggtaaaaataagaccatgttactatcgtgaggtctttaaagaagttgaatggatcttctaagaatcgtctgattcaagaatcatacaaaaagaga  
aatttctacaagaagacgggctcgatctgcttacgatggcatcccaaaccaatttcaagcacgttctttacaattcgatgaaacaacagaa  
acaatcccactaatcagactatggtaaattgattgaatcatagttaaactgaatatttatacgttttcttccaattatcgtttttataggtg  
ttttctgttataatattttaaaccgaattctactagaatatacaaaaacgctactgtcttaagataatataaaggtggtaatagtcgacgtattgtc  
actcaacaccaaattttaaactactcaattatctttcttctgcttcttcttctctcgttcttcttcttcttcttcttcttcttcttcttcttct  
tataagcggagaatttccaagtaatctctacattcactgttacaacattcaaagtttgaagtagtaccgttttctttagaattgaacaactt  
tcaataagaataagggaataatttaggaattgatactactattgtgaataatagaccgggaaagagatgtgcattgctttctgcttcttctg  
ttcattgatgagtcgatccatcttaatttctcatcggaataaactctatcattctgaagtaataaacaatgcttaaccccaagaaatgca  
catgatgaaaattctctacggaaagaataaaaaccggcaagcattatcagcatatggaagaaatggggctttcagttaaagaagcaagagc  
ctccaagaataactgtatgctagggcaattatggcagttttaaanaatgcagaatcatcgacttgtactaacacgtatctataggcaattgtc  
ctcctctctcttctgagaggttgcagtagcttctttctatataaaacaattgctaatttttctattagaattatctcagaaaacccagaga  
gtcaaaaaacatgttctgtatcgcattatcttctgcgaactcgggttaattgagaatgaatttccaggactatgaagcaattcgagtagc  
atattcgggtgctattcatgaactcctcgtcaagcccacaatgtaacattggccatgttccgatgagcatcttttctgtaataaaactactc  
attcatgagcgtctgtcagatgaatctttattccacttgaatgagccatctgaatctcaactcttctgattcgttgatgattcacgaatatt  
gtaatcacgtatctccattctgacatttctgacagtacattttaaagaattctcctctcaatatgtctggcttgaagattattttcaccaaata  
ataccaactttgaaaacttttacaacgtccaaaagctcgcctattctctgatttcgaggaacttgagatgcttgaaaaggtggttacggttatgtg  
tacaaggatgaagcgttaggaattatgatgtaacattgataggcacgtaacaagttgatggtgttgaatgcttgaaaaagattccactc  
acgttacgatcttcttcttcaaacatgttctgtagtcccgaattttagctcgccttaaccccaacattatcgattctattctagttggattg  
agattgagccttatctcataacgacctgctgagttcatttgcaccgaggactattagattcacgcagcattgattcaaatggcgggta  
caatcttttattgatagaaactgattcttttagacctgacttcaagtgcgaattctttcaggttcttgaagaggattcttctgggactcat  
ttcgacctcttattcgacgaagcaatctacttgcagtttggcagctttatttctggttataaagagagtgaaacaagaataactcaaaaatgattc  
ttcgagccagatatacgcagataaagatgactctatattgtgaaaaagagaatcgttctaaagactcaataattgctcttctctcgtcaggtt  
gaagattcaatgacacatgaggtccctgtttgatcaaggcctattgtctttacattcaaatggctttatgtgaggaacactcgagattcatt  
gaatagaagaataaacactttcatggtatgcttcaagaatctctgtaaccgatacatttctgcttttctagaataactagagggttattgtagtc

ttcataacgtcatgaatttggttcatcacgatttaaagccaaggaacatTTTTctatcctcaagtacatcatcggaacaaggttcggttcgtctacct  
tgTTTTctggaaagcctcatcttcaaacgaaccattgaaagcaaattttcgttcceaagatcgggtgattttggttggtactttcgcagtcagat  
gatggtgactcgtctgaagagaatggtggattttatTTTgcaggcaccatacttacgctgctccagagatgctatcaaggcatatgaaagctcaa  
gctataaagaatgacccgcaattgacgtttatgctcctggaattttgcttcttgagcttttgatccttttgggaccgcatggaaagagtttcttg  
attaacaattgaaaaaaggtcttctctgaagactttctgaacaaatgccggggaggcaagtctcactgtccatgttgagtagtccagcg  
aagcgactacagctgccaaatactgaaaactctatTTTtagcaatatggcggtaaatgaacttcacctgtatgaagctctgttagatgatgttc  
aacaacaaaacaattctttaaaggcagagctagaacgcgtaaaatccaagcttgcaattctcaagttgatgttctacgttttatgtccccttctt  
acgttatgatggcttatttacgatccatctgaagtgacgaatttagtttaacttttagtttatgattatatgacctttatcccttttcatttatgctt  
cgagattatatgaacatattttgaaattttctctgcttctgtgattatcctttactgtcatattcctctaagcaagcatgcccacgtctatattagca  
atatacaggatgggaaatctcactgaaacttactattaatTTTTTatcagtgtttagtaggatactacaacctctaggagctcactcgttca  
aacagctagctactggcgatattaaagtattgaattttgatagtgagattgaacttaaactttgatacacatgTTTTgtcatcgttgaaactgc  
agtttgattataaaatctctatagcaacgtccgaaagatttagctgattaaaacgtttattagccactataaaactcattataaaagtttctt  
gttcttcttgggtgacttgacgtagaaaaattacatctatcttgacggatccgagaacaaagaaaaatgaaacaggcagtttgagaacttct  
ttaccaaaactctttactactcattctttgatcaatacatttggttctatgtcaaactcttaaaacatagaaaaagaagtaaaaaattgaagat  
gaaacaatacataatggggaataatgagattcgaatatcaaaccattattaaggagattcaattcattcaattatggatggtccaccaaacg  
atacatttgcacttctcaaaggagagtagtaccaaatcggtagcttcaaaaaatcaaggcaatggaagttgaaaaatgatgatctacattca  
aattggctgcttacttcatcgtttctaagcattgaagacagaaatctgttcttcaatgagtagcttagaaaagactcaaaagaacaacgtcacc  
gactcaagaatccttgatgccgtagatattaccaaaagtgccaaatgatcctaattgggtgatgagctattttagaagtggttactactttaa  
gaaagagaaccaggaatcgactcttcttcttgggacccgaaagataaccctgtctatggaaaaataatgggcatttatcacgaattaccttatt  
aaaaaggataaagtactcgctgtaagcgaacgagctgagactacaacgaagtgctcagtcgcatcttacattgagaagctcttagataaaat  
gccaaagtcaagcatgtagagtccttagtagctctcgcactgaatctgttacttgggtcgtactTTTTTatgatggatggccaagatcttt  
acttaagctttgggtgacttctgggatacaagatacccaaaataacagatgctaattggagttagccgttttaaagtctccgttggttgatga  
atcatgaaagggcgtctttctatagataaagagtacatgatagagccattctactatgtctattgaaacctaagttatccatccgcaaaat  
atccgccaatattgaccttttgttactggaacaatccgacaggtggaacatagctttacgaggtattgaattattgctgtgaaaagtaa  
aattccctaaatattatacccttggctgcatcattgggaggtgcaattgataacagaggaaagcttggaagcttgttgggtgctgaaaagac  
gccctgaaagaggatccggtataaccagatggtccttgagtattgtttctcaaatgttctcattaatgccttggaaaactttactacga  
gggaaatgctgtccgattcaatcaaacgattaaagattctcggttcaacctatccttgaagagatgagtacataaggaatcaggatatagag  
agacaggtacgaaagtattactatgttattgaaaatgcttttctgattgaaacctcattcaaatgagcgtgatttaggctcttctgttctttaa  
atTTTgacaatgaagacctgaatgggtcttcaaacagttccttaacatTTTTTcaaactagtgaaaactaacaagctccttctgaaataattaa  
cttctggactgctatTTTTTaaagcttcaaccaattTTTgaaagcacttcttctgaaagttgataaactacatgaagaaatgacttctgatagctt  
tctcataggaatcatgctaattttctacaactaatcgaactcgaacatcatcgagctagcgaagtgaaattgcaacgccagatgctgtggat  
gctcctggttatggtgcaattctcgtcggccataggaagagttcaaggaaatggaagaagttagataatctgaaaaaggttatgaagcaga  
cttaactcctgatagcggattctttaaagtaacttctcctgacaaatctcatgcttcatggcaatgagaacaacgtcttctgatataaaaaaga  
tgccgaagatgaaaacataggaatctactacttgaatgaaaattccatgaattcatcagaacggatagaaggacaagaaccgtcggcg  
acctgacaggaatagattattcgaagaagaagagcttgaccaaagatgatgacttaaaagcagagaaaagaatctaccaatcattcaggca  
tcttgaacccatttctcgtgcaacttcaaacagacaaggtcactgcaaggcaatcgatctagcaaatgatgggctcaggtaaaggtattgatt  
tatcaaaggcaaattctattgcctttaaagccgagcctgtatccgctgtgtctattcaatcgtttgacgttcacatgaataaaacagggtttagt  
ggcgtcagtgataaagcggaaagcctaagctctatagttttccgccgaagtccagatggtggcaactctgttcaagtgagattgaaagaatta  
tccgaagagcaaaggacatgagtagtcttgaatgcttcatcaaaccagctagagcaaaagcaaaatgaagcaatttctgctccgctatcgctcc  
accagctcctcttaccctcggcgagatccctcaagtaaaggtgatactaaacctctatgactaataacctgaaagattcctgacgatttatt  
ctaaagagattactacgaaagatatattaatgggtcagttgagaataacagtctagcaggaaaagaatgccactggaagttatattattcc  
ccctgaaacgacttaacaattgactggaataatttagaggtaccggtcagcgtactctatggaatagaccttagctgatcttctgTTTTaa  
gtatcaagctgaattgtatggtattttgaaacactgaaactgcttggcatgagagaagccaaaaagtttaagaaaaagattccactagta  
atggatttatgctcctgatttacagcagattttggcattcagttgatagatttggcttcttattgagattgctccaagtttattactgc  
gattctgacatattggaattgatttcttcttggatagaaaattgttctcaagattcattgaagaaaaatctctactttccgtacaactgg  
aacaatggagtgctaattataataggggttcttggagctcaaaaatgggagcaagatacgtgctttgattattgactgagagttattatg  
aaaagaggatgaaatcttgaagctatgtctacttgatcaaaatcatcgcgacttaaaaggcaataaggaaaattcattgaccttacttg  
atattaagacgagtagcaattcaagatctactaaactgattttgcttcttggaaactatatgaatgacactcccaggcagagacaaggattca

aaatcgatagctgcagcggtaagcatgataaagaatgaagaaaacggcttgacattactacataaccgtcgaaggatcattcgcaaatgtttt  
cctgagctagaagaatttctcatgattggcaaatgtccggaagtgtgaaagtcaatttcgatcaactagaacaagactgttaagccttgcc  
aattagttaaagaaacagaggaagattttctgaaaaaggcgaattgtcaggaacgaaagcactgcatcccgatgatcgatacgtgagataat  
tactccatggataccatcagcgaaggatataacggaataaagtcagatctcatgcaatgaaagagacttttgagtgtactttgacaatgtt  
tgggtaaaactctgatagccttgctccggaagctacttcttgaagtcctcatgaattttgaaggaatacaataaagttaaacaagccaatctg  
aagttgaagaagaggaacgaattgctcatgtacgattaaaagccttgggaagcaacaggtaaaaagacttgatgcaagactttacaagaaa  
ctattaagatgagaatgctgtcatggataatctctgaaaaagtgaaacagggaaagtgtgatgtatcacgtctgttactatgaggaagag  
cttttagctttagatttctaaagatggaaatgaagctaactccgattcaaatgaatcaatgaattcgcatataaacgcccgaagcggttgtt  
tgaagctcaaaacatgctgaaacaattaaaataatctgatgacacctaataactgaatacgaataaataattatggatgatatggc  
ccaaaaggatataactgaactagactaataatagacgcttgatgatggatatacttggtaataattatggcttagagagg  
taagattgatctccagtttacgactgtaactgtataatcagagtagacgaaaatttgagtcgtaaaagaaaatagtaattttctcgcacgag  
aaatttaaagtaacagtaaaacatctgtacactcttgaagatcctgtacgtcttgcgaagtgttacgcttttctttcacgagatccgcgg  
accgcttctcctttatccaagtcaaacaggtcttaataaggcgtgttccggtattggtaacagagtggatttctggaactttgaaacagg  
acctgaatcaatgaccttccaaagaaagatgtaccaagtgtgtaggcatcttctgaacacatcaaagatagtagcatagacaattgtcg  
cctttcttttctggttctgaaaggagaaatgctaaaagatcagaacgagcaagtagctccagatcaacagtaacttcatcaaaaaggacg  
tcaaatggctgtaaaagctccatgcaaaagctgaacacgacgtctttcacatcagaaacggcatgattctccatgaaatcaatgtctagaat  
ggaaagtagcatatcacggcgttctggaataaatacactccgacagatgcaattagtcgagcaacgcttcatatctgatgaacgactggattat  
gaccattctacgcaagattagcttttgggttaaggaatacttgagcctatttctgacacattgatcgacacgaaatcatgcatacct  
gtccaagatacaaacgactttgggattcacgaaaaggatctttaccaatactgacacctttccagccttagctagagactttccggccaac  
agacgcaataaagttgatttacctatccagcaaaaacgcaatgtattagtagatgaataagaacatagaataaaaataaaaat  
aaaaaacttaccgacccgttctgccaacgagcaatgtcctggatctcagggaggcttaatgaaacatgatcaaggctcagtggaattctg  
gtgagaatgtatacgacagattgaagctcaatgagatccatattgaatttaacaagttatcagctgttttgggcagacaccgcaaatctattc  
tttgggtatttacaagaaaatgaccttctatgatcgaaataatgaatataactaaaaaaaatagaggtaaaaggatcaaagttcaatgt  
aaagtaaaattatgggagggatagagggctttaagaagtgtaaacagaagtaggaaaacactatcattcaatctacgtccaaaacgaga  
tttctgttttacaagtaaacgaaattgcattttcttagtactgaattttttatgtgacgacccaaaagtaattcatggtgcaagctttgaaatc  
agagtagttatacaataactgaaactacacatgatttagttatggatcctgttgttgaataattgaaatcataacattgatgatg  
aatcggctgtgagttttcataattttgctctgagtatatgtgaaaaggatcagacaagaagagaagtaagaaattcatatgtcaaaatgatg  
cttaacgtagattgtcttcaaatcttttctcgtacaggtattttgatcaatttctttttataagaccagaagtaacattgctgggg  
tacaataatcgtaactgtcacgacgtcacgggtgtcacaggtgtcacgggagaaatctcacacgcttatgagaatgaaatcgagtggaaataata  
agtacaattacagaattttctattggaattggacgtgttagtactacgtagagtaatagtaatatgtccaggatctgataactagaaagtgttc  
gatgacctatttagcctgatcagtcgaatctatctcaatctggagaattcactgtgattctttttatatacttctgctgagaaaactaatgt  
aatctatttcttataagacaaagttcttttctaaagaactccgttccgaaagctgtctaattgttcaaatcgattttctatgctttgttactatt  
tgtaataattatgtcctttagcttattgttattgttaataactcaaaatagctcttatgatagtatattgtaatacttataatcgtagtaattaccttt  
gtaataccgacaccagcataaccgtcggcagacttataggccttaggaatcgctaaatgcttaatgaagtcggggcagccctaaatccactgtc  
tttctgaccgtgtttgacaacagggggacctccaagcaaggtgtcgaacttaaaaaacaaaacaaactaccaacaccttttcttattgga  
ctaatagttctacacacttgccttctgacaccttttcaagaattcaagaatgagcaagatttattacgaaccctttggaattctccgccc  
tctgatgattcttatgcttcttaagccgttacataagtgaaatctcacaggcattcccaggatcagttgactcgtttagaagcaaatggtag  
ccttaatgaagcagttatatacaaacctcagggagagactttacaagaataactgtctgaaattcgtgggatgtttcaagagcttagagaaga  
gctcagagaagatagattcaaggaagaatggcctccaagaaggacagaatagcctcagagaagatagattctaggacaaaatcatcaga  
gaagaatagaagacaactggacttattgaaagatctttcgagtcaatagatgattgtctcaagcatcagccaaacaaatccaaaat  
gaacaagacaaggacctcagcacagagatctgaaaaacattataatagaaaagctggcaaggatacaaaaccgattccgtttataatggag  
aaaatgctactactgacctagttaaaaaccatttccgacattgacagtttgagttaaccaatgaaaacgtacgtggaaggttatggct  
acaagtagatcggaatgagcctaaaccttttttaaaaagaagatttcaaatctgtcggtttaatttctccgaaaatacattatagattttcc  
gacagcacgaaaccctcaagatataaggaatcaacttactacaccagatcgacatgcaggaagactcacacctgtcatcattgatgaatgtt  
tacgacaaaatgttatctttcttccccagatttaaacctataatttaagaaaatgatttgatacttctgcttacttactaccttaataa  
agtctggaattgatttcaaaaacacttcaactgttctaactatgaatcatgtaaccattatttttaataatgaagttgttataatata  
cttaacatgttaaaataatgaattctatttttgacattcgaacgattaacaatcagatccgatagcaaggacaaaatgtcattataggtgt  
tttgttaataatataatgtattacagtacactatgctataaggatattgtacaatttaagaaaaaacataagacgaaaggatgatgtattacagct

tgtaacaacaattaaaaccgtgatacagaaatcaagaattatcgcatcggaaagtaaagacccttatataattgatgatgcaataacaagtc  
ttttgattgattgattagcaaaaactaatatataatctctgtctacaagcgaattcttcagattggaagattgactgatctggcctaagtga  
tggtttcctgcaaaatcattaagctacctaggtccctagacattatagcttttatatacgtatagagcaacgtccaattcagcatacatccatactg  
cttttagctgtttattttatcgaaaaacattattatacggcgtaaggatctctgtgacataaacaacaagaattgagcttttaagagttcta  
tcgattagatgaaagaagagctttgtatagaatttcatcaagattgactttcataaagcataaagaacacaatattttgggtaaacaccgtg  
gcttttcaggaagctgtagagatggcgaatgaagagaagtcaacgaacgaattatgtatagtcaccttgacctaatggaagcactttcttcca  
taatctatagaatgaatgtgattggcaagatggattccgctgtagtgtgaaaaggagcgtttattgaaggttcgtcaagattaatcagagttgat  
atgatattcgttattccaagttgcaatactcattaaatttcaggccttctcaatcatccattgtgtcaaggtaatgattaggagactccatggtat  
tcataactagtagtgtcaagatgtcgtctatatacagaatttgcaccgttttcatatagtttctgtaaacgttcaaatcatttaggaatggttc  
gattccttgaaggaaacagagcaagcattcttaaaatccagattctcaggaaaaacagggcttgactaagaccatagctagatggtggt  
aaatctagtttcttttcatcgccttcttgaaaaatcttcaaagggattaaattaccctcaaccttaacaacaagagaacgaaagtaaatt  
gaaagcaaaatcaagcagaaaagaccgagatcaagcaaggaataaatgtaaaataagatgcaattcttcaatggtttcttttagctatcat  
gttcatcgcaggatgtaaaaatttactcggctgtttcccatatttggcatatgactagacaaatagttacagagataaataaaaaaacaat  
gaagaatatatagaatacaatatacaaaaaatccatgacagaatttcaaagcttttttgccttgaagttgttccaaaggctgctgtaga  
agttagttcaggattaagagggatctcagatgctataggagcagtttctcaaaagtctctcaggtgactcatatttaagattcaatgaactggc  
ggtggtgctttgagatgcttttctccctctgactttcaaccaaagtgaaatcctccatcaaagaaccacttcaattataaagcagcgga  
ctcaacatgttccagccagagttgtgacgattatcggcaacctgaagacaattcatacaggggtgtcaaccaagaataaacacgctggaat  
agactgttctgcatatttctgtcttttccatagctttgttagcggagactgtcaatcttgaaatgcatagcaaacagatctagctgatgg  
tttctattctattgctatatttgtggctcatgtcttttataattgcaaatccaagacgttttcaagtttctaccacgggaaaagcaagaaga  
caagaagaggacgggactgatgagaaaaaacaagattgaaatggcagcagatctgtcaataatagtaaacgttctgctcaatagctcacct  
caggaaagtcaatcttactgaatatcctaggacgataggaaaaagcactcaaaaatgatgctttcgcgtctactcgtgaggttccaaccg  
agtcttctttgttctcaatacagctccagctacatgaaaaccgcccataaagtagcatacataattaataactaaaagcatcaaaaaaaa  
aaagtcgtcgtagagtttctactgcatgcaatctggtttcccatatagtcacatatatacgaatttggggcgttttttcaatcaaggagctt  
tcccatcagtttgcagcaaatcatctaggataatgagctcgcgtatatacaccctccacgacatttgtctcaacgattcaattccatcgccttaag  
gattcttgattgtccccctctatagaccagctcagtttctataattataaacttaattctttataaagtatatacaccctaaagagatattgct  
ttatggactaacgcaaaaagaaggaaggaataaacggagaaataaattctgacgattggtaaaatacacaattcatgaattacagtgagc  
ctaaataaaggctacataccctaactgttctaaaactcagtttaggaagaattgctggcagagctaatagattgctttacttctattggtttg  
agaaacgttttaggtatctctccagacgttttagtaataagttgtaatacaattcaacaccgaagcaattaacctattctatccacttatcaa  
attttttaccgatataatgtcgtactatttttaggctacaatttaggtcgcagaatcgttggtatgatattgacaagcaaatgtcacttaacatt  
gtaccaacctgtttcacattcattcactaattcggattgaaaatgaagatggataagacaattcaaaaagccatggggattagctcac  
agaatgaagacggcagtagcggctactggaacatgaacgacgacgcaatcatatttccacaacttgactgatttctgagacgattgaccata  
aatactttatgactatgagaacttatactttatcggttatttgtgtttatcgtcctttggtatttctgttatttttctcaaaatgtaccttcc  
aggtaacattttcatgtaacataatctttgattgtctattcttaggaaaaattgaaaaatgcaaacatgctttctactttgatttctttataaa  
aaagaatgaaaagaaaagagacgagaagagaaaggattatggtgatggttttcaactttcagcgtgctcgttgcattatgttctcgggtg  
ggatataatattcattgttgacggatataaatcgaataaaccttttggtagctttactcaggtttcagttccctgggtgaatacaaca  
agcatagtcataagttataaaagcaaatcatattcgtccctcaatgtagtattggatatttgaagtagccttagatgagatcttatactgaaa  
tctcttggtttgcaaaagcttgggttcttctaaaatgtgtacaaactataatacaaaagttccttgcgaaaggaaagccatatcggctctt  
cattactttgtcgtttatagcaaggtaaatgactccatgcatattggttttactattttgcaataatctactctggaataataaacagacaac  
aattataagaggaagaaaagtaaggaattccttaacaaaacctgaacaaaatggaatagctaaaagagtcatttgacattgcacagatg  
gataaccaagctttgcttcaagctttgtttataacgttgtgtagcgttctttataaaagaagtaaaaacccttccaccacaatcttatatt  
aattctatttaagttgtgtatgttatcgtttaattgttcaattataaataatgaggtaaaaattcttatataaaggaggatttcagatctt  
aatttatgtccactggtgaaattcaaattccaagaatgagcagacgagacgactaccgttatgaaaaaatgatcattaccatcatcagattag  
taatgaaaaagtggtcaattcacgaaagtggttccggacatcatccaacaaccaaggtcacgccctagttatgaatcacgcttctctt  
ttcaattctcagactcaaccatcattatcattattatccttcaaaatttagttctgaaatcgattcaatgacctgacgttcataccagagcga  
gtgatgaacaacagacgcttataaagcttctgatcgtggttagcgaatcaactaaaatccacgaaaaagcttggcaagatacctctaaa  
aacgtttcaattttgaacacgagatttgcagcagaaatattttgggaaaaagttcgtccagacgttttctgtaacaactaagaagtaatactg  
ccgagaaaagcttagacgactttgtcaatagtgaaacatctagaattcttttctctgtaaaaatagattatctatgagctctatgattttatt  
ccataactttgtttatagtagtacttttagtctaatatttatcttccgttgggtgtccctaggcaatagactttgattataaataatttctggtgaata

ccattaacagattcttgtaaaattcagcttctcaatgcgtacaaacaagttgaaaaagcaaactttcaccttgcgatgctgtaaaagtgaa  
tatgtcgataaccagtttgaagtctatacaatggacatgcaaaaactgcaattactgaatcattaccagagcttctcgatgatgaacaaaaa  
cgaatgacagagtagacatcatctttcgttacgctttcatagcggaaactcttggccatagggacggaatccattgcatgtacaacttgaa  
gtccaccgaaaggggtctctccatagaatgtattgcaactgacaaaaggcaaaagcgtctccgaataaacagctctttggcagcggcgaat  
tgctgacctgataatattcaatgttaacaacattttcctgggtgaattgtctaattgcttactttgctttacttttctccatggctcgctgatactct  
ggtttagtaataaccactaggaggatccgctgaaaagagcatgctttattgaggccaacataagtttgccaattcaaagctaccatc  
tgacaccatacgcagtaaaattgaggattcaaattgggtactgccaagccgtaaaggacctgggtaaacccggcataaatactttgtattatgt  
ttgctcagtcggaacatcgtctttccatgtctttgatagctttcagaaaatgagaatataatgattatacgttttgattcggttaagaaaa  
attgcaaacctgagtgaaacacatattggctctttgctgagttcagatataatcattttctttctttctttggtcatttgataaattccgc  
tctccgcttctaattcagaagattctgtatccgtagacgaatcgacaacgccgcttggaaaacatctatcgtgtggaggctgaaatagttg  
ctggcatttactttaataaatctgtacagtagttgtctggagatggtagcacttttcatgtattcctaattggctcagtaataaataattcc  
aaaagcttctctcatgtaacaggcatttctgctgctgttctggacaacaatgaatttctaaggatataatcacaggataagcagaacgacaa  
atgcatatttttaataacgtctataacatcattaaaccggatgattgatgtaaacgttctacatgacaaaccgggtccatcaggccatccca  
acagcttattcaatacatttacaacctttgtaaagaccgaataaacctcgtattgaaactttcccagcaaaactgtttaccaagtaaatatgat  
tatgcaagaagagataataatcatttaaagggcgattcatatttgattgattgaagtaaacggggcgtagccggagacgataaataagag  
gtaaatcaatcaatccattggagagtagatgattgcaaacgagctatatacaagctcaattgatcattaatagtcgatttttgggaat  
ctcgtaaaaaaaaaataaattgatccagactatttctcgaattatccgtgtattataaaagatctgtttacttctggcctgttttcagaatac  
taacgaagtgttgaaacctcaaaaattagtttccgggtctcagagtgctcagctttacgaaacatctgctccagatattcaaggaggcattgag  
atgtagctttgacacatacattgtacatccaaaaggttaattccgctgtttcatcttttctaattttccaaggatggctaatgttcatctccct  
tgatcgtttgaacattgtgattgttacaacagagacctgtaataaactcattaaacggatgtctttaagccttctaagccattaccactga  
ttaagaccgtccatagtcggagaatgaaatgcaaagcttctattatctcagctgtgtaaacatcgtgaacctcgttttattttcgtaga  
aatttaaatgttctctataattctagattcgttcttgacgaatttctttatgtcatcgacacatagttacggtaaggttgccagtgttttatc  
taagatcatatagcctgtaaacggatccagtgacacttttctgctgtctaccttcttttagtcaactcgaaaaagaaagcagcattttggatggatt  
ctgggacaatagtcgcaagcaagtccttgtgtcgaatatacagaggtagaaggaaatgtctgagtagtctgctccctctgatcttgattttga  
tgatgtagaagatttctgaaagatcgaagcgggctcttgcgatcgaataaaatattcaactttacagatagccagtttaaccaggactctg  
atcagtttactatacggaaacgctgtttggagtgagcgtcaagaaaagaagaaaagaattggatcgtttttaaagtagctgaagaagagg  
cctctttatcacatgtagtattctagctcatttgaagccgaaagtggttctcacagaatgactccggttgagtggttagcagagggcac  
aaattgtcatttaattgaaacgaacttgatgtcctctctaaaggaacagggctttccctaactatctcgatttctgttgatcattatcttttgattg  
aatagcatagattatacaaccgcttaaatgttatagccaaaatctgtccttcttttcaaaaaccgttgttggtctcaaaattcattcacagttga  
cttggccttttcttttagagagacggcttcttttgcctgaaactgaaaaatgaggaaatctgtaaacagccttctcagttgaaattcaaacag  
ctcattgaagttatacaagaactctgaactgacttaagaaaaaacacagctgaatctgttttagttgaatctcaacaaatctatctattgcttta  
ttgtgctgactgtactttagcaaacatcactctgctgtagtaaaaaattgtatatttaaacgcgactatttttcatcaattcacgcgt  
caatcggccaatttagaacaactctgcagaaagatgaatctactaacgtatccgatgaatctttcaattaagagctttttatgaaattgt  
caataagaggtttcagaggaacaaagccttctctctatacgtacgatatttttctggtcaatgtttcacatcctctgttatttactttttat  
tgctctctttgttattctattttgctatagctaagttcgcgtacaggtcaaggccaacctgactcccactgagtaagggtaatgcacaaatgggc  
ctaattgaattttcaagagtacataccctagaaacttgaagacagtaaaaaatcacataaacgacctcaatgggggaaacagcagtggttca  
gccagcaatagaaaaagaaatggagttttaaagaatcagcacaggaaaagcaagaaaagtcgtaataagtaaggcgacagaaaaag  
aaatttcaactgaaacaacaatcacaagcaaggaaggtggtgatgaaatgattgggagagaatttatagaactgaaggaagagg  
agcttcaatgaagcagaaaaagattatgaaacgacgagaaagagtggtgttcaaacgaggcagatctttactcgtagtgactatctaac  
atggacagctcagatccgttgtttctcagtagagacattatcaatcaattcgttctcctgaacctgaggcagacgaggagccgtagacaaa  
ggccaagtaattgactcagatgatgaggtccttagcgaaggcgaaggacgcgctacagaaacgcaagaagaaaaactaagccgtaagaa  
gctacgaaagatgaggcgaatgacggttgacatctaaaaatgatctggaaaagcctgatgtggtgaaatggggatgtttcttctctgatcc  
ttgtccttactatcttaaagcttaccaaaactgtactgttctcctgctattggaacaaaagcgtgattatctcagtggaacacagggcattg  
agcgacaactattgagctaccttctgtatattcgtgctaccggtattgttcaaatgcgaaacgcggtccatgaaaatgaagctgatttccccttgc  
tcaaaaaatgaggagcgcgttcagcaaaaatgggaaaacttgatattgattatcaaaaactcagacgcttcttctgttatcaaacgaaac  
cagtttaaccggctcggtagttattatgaaggaaaagaattggaagccaatgtaaaagaaaagaggcctggtgatataccgaggaact  
gcgggaagcattaggtattccatcgggtgctcctccttggctttatgcatgcaaaaatttggcctcctcaagctatcctgacttgaattc  
ccggtgtaatttccctatcccctcggagcaaatgggggttatcctcctggggatggggcaaacctcctgttgaccagtaacatcgtccattata

tggagatggtttgtagtacaaaaccacgcattcccgcaggtgctggtcctccagaagaggttcagcattggggggaattagaggaattgagg  
aggaagaatctagtaagaagaagaggagggaagaagaagaaggagaagaagctggtgaagaatctgtaaatgcgaatgaagctg  
gatataatcgcgtactacaagcgtcaacaagaagatgaaggtgtgaatctatttctactttgatcaaaggcctattgaagctgagaattcg  
aattgcgaaagcaatttaataaacgggaagatgattcttctagcctttatcaagtcctccggaacaacatacaaacgtggaaggattcatgg  
gacccgaccatcgttatcaaattcctactaatgaaagagtcggttctcacaacgatcagcagaagaggcagaagcacctgataaccgacaaaa  
tgaccagtggcaaaacgatttctgaaatggttcagagcaggcgtctattatcgctgctaagcgtcaaaaaactcaacaaaaaaggaaaag  
ttcgtttgtaatttatttagatggatttttaagtatgtaattaggttagtttactttattttgttgcgctccctttctatctccaggttatgt  
attcactaatttttttccaaatagattaaaccaacgtataatataatagctatgctaccaacccaaaaatagatccgaaatccaaactta  
aaaaaataaataaccagctttttagatggaagctttgtggctgtacttttctcaatttagtaccgtatcgctgacgcttcttgcaggcactga  
tgggtggaataatggctctacgctgaaggctgataaatcgatctttaaacaattaccctcaggcttcagttctttagagagctagttactcatca  
cccaacttcaattccaatggattctcaggtaatgtgtttgccaattttcttcttcaaacgaatttctgtagtccggaatttttagtccacta  
gtgatttctcctcgttttctttattgttcaaagcttcgaaatagaaggagcttatcaaccatcttagcaattgcttcttctcgcagcttct  
aactttgcaagttcttcttctttacgctcttatttctgtagatttctgcttacgcttaggttaaccttgccgtgagctcaatctgctttcagct  
tccgttgtattttctatccccagagcgtcgttttctgctgaaattagacctttgcttcttcttttaactaatcatcttctgaacttcaattca  
tgaagacgttcttttctttttgatctcgctgaacccttctgatcaataaggccatccatgattagatcaggattatacgcacgctggatca  
gcgactccacattaggaacaagttcggcattatcagcaagattttcaggcgccttagaaagtgaagaaggctgtttacgggaatcgtagattct  
gccgtgctttcccaaacatcatattcaattggttcttttctgagattcagactagctgctgctgctgatgccgtaggctccaaggggttctgtgta  
ccaaagactttaaacggttcaactcgttctttgacattactttgccctgttgcctatgcttaagccaaaaaccattagacttaggcttgaagacaac  
tctcaatggcagattgtttgcaaaattcatctacctcaagggtttatcttttctgcttcttggccacacgatcatcacccaaagatcga  
ctacgaataaagcgtcattagacttttagccaaattatcacttaattattgtagcctttgtttataaattcgtttcaataggcttaccctcgtattcc  
tcttccccagcagcctgaaggccacctcgcacatctcaaatcgatagctttctcatgatttctgttcttcttagatctttagattatattgagatg  
gtgcagcgtttccctggattccatttttaactgttttcttgggaattccacctgtacgaaaagtcaatgtagagactgaggtttgctaaggtaa  
gttgtgttagctgctttagacttagggacgcgcaagcttcacacacccaaaaattttatattcaataaatagtttctttatgattagaacgtttga  
aaaaaggttatcacggagtgcttctgcttataaactcgcctacatgcatgtaattatgaaaactagcgattacatgaacaaatttctgttctt  
agcgttcttaggtgctcaattatttctaatacactgaataagtgcttgaatagactgtatatacttctcggttgaagcattttgcatatc  
ctccctcaacgcaaaaaaagaaaaaaagtgaagaaatgaatcattactagctactattatagctttagaatcaatttaataaacattcat  
taaaagatagaccgtcgttttgcaggtactaccaaccgatgcaaatatagggtttagcaattcaacaacaaaataaaaaagtatgtc  
aaaagggtgatcactaaaaatttacctttctgccaagaactcgttagtaacccccaaagtaattctctataaacagaaccagcttcgacc  
atgagtggttcaatgttaattgataattacactaataaaaaaacaatgaaagaatttaaggacgcttaaccaaataccttcatgtcaaaa  
aagttgtgaccagaagattaggtacgtaactagattaaatatcaagggttacatttaacgaacctttcttttaaaagtgtaaaattgt  
aagtagctaggagcagtgcttctatcttccagaaatgagagaagaacctgaacggagttgaggatccacatcgccgcgcaagaatata  
aactaggtgaacaatcgtaccctgtctaaagagcgtagttaccaagaatagcatgcatcctagtgttaagaggattgtccaaaattggtagg  
taaattctccagcctttagttctgcaatagaagatacgcacaaagcgtccatagctaaactggggtacagcatcttaccatgtacaagaattgct  
ggaagtgagatccaacaaataaagttcaaaagggttgcagatggccgaagtaagatttaaaagcaggaggtagaatgacgcatcctcagctac  
agttctgcttctagcggcatgcatgaagactatacagcgtgggatacacatagcgtgttagtaaaagatgtaggcaaaagtctcaggttgataa  
agcaatcgtacgcaaatcagaaggtatagactagatttccgaaaccagatgtttcattaaactcaagcaaaagtaattgtaacaatttaagtt  
cgtacagattgacaggaagagctgcaccagttttgaccggccaaattcttttatacacctcaagatttcaattaattgttagtaattccgt  
cacgagcatcacttaagttagaagaaagtgttttctggttctcattgtaaggacatgcatcattgctaattgatcagcggacgcatacaattc  
agtcaaaactgttggttactggtaacgacaaggtgacaacacgaattcttctcgcgcttgaagtagtatgcaagattgacgcttgaagaag  
caaaaggctttagtaattgtatcttctatgacagcttcaatcacataacattgatcacgagggaaactgggaaatgacgagaggtcgtagaacga  
ttaaagaataccatagaagaagacattcgaatgccactagaaccacggacacgcataacagcttcaaggctacttctgagctgagataat  
cactcaactcggatgcaattttaagcatcttactcgcagaggtcattccaacggtaatagaattgagcttaccagccgtgtaacgaggcaaa  
cagctaagagtagcaacatcctggtattgtgaagaaaaggaacatatcaacagagacctgattcgtagaacattcgcagcaaaaagattat  
agaatgcgtcttgggtgatgtagtaattggactcgcgattggttcccaataattttggatcctcacgtaaaactaagttaccagaaccaacttgg  
aaggctcgaacaaagcaacaaattttaccaccaatattctcgataagatgttgcgacgtttaaaggcaggaccaagagcattactagaatca  
cgagtggaagcaaacatggaattgaaattggttaagcaattttcaattcctgtcgcactcacgtaagttgagaagcaaatcttgattacgaggc  
aagaaggaggatcatcgagatcgaaacaacatctgggatgcttctcagcccaggagcaatagaaaagaatgaagagaactatcaac  
accgataaatgcaacctgtgtacaccttcttattggggattcgatccaaagattcaaggattgtacagagtggtgtagctaccataaccagaaga

tatagagatgaaagaacatcaattaaagacatatatgagaggttgaggagggcgaccatatactcttggggctaagaagtcaacaac  
ggcatagtttagtcaggacgctgccatctgtctcttggacatttctaaagctatcccaatcataagactgggtacctcattcaataaccacac  
gagttacatctatagcagtgccattgtcgacaaaaactaaaaggggtgatatacatcgccatctacgacacctagaataatagtatcactg  
actacaggaacaggatcgtcttctcaagcaatgaggatataaggacgtaacacaatggcaaacggaagcttggatttctgagaagactattcgt  
gttgggaatagcctttaaagttgtacgcatgtatttaggagggcagttggaagttcagcctgctgtagcagaataagtcaacggcaagttatgg  
gaagtggaggagcgtataggtctgaaatttccggtgttggattataaatcaatagacacaagttcgggtggggcatcatggcagcatttggat  
cgggacccaagttaaccattaccatctgagtagccaatgcatttgggtgctgctcaggataaggagataatgtaggagtagcagccatcaaatat  
gagggtcagagacgggtggaggggtcatggggacagttgagaattcgttaagttcaaaaatttctgcaggatattgctgtagagcgggtgag  
aactcccattgtgggtacagttgagctgcaccgccagctgcaggcattcctcccattcctatagcagcgccatcagtaggcatttgggaattcc  
tatagcagcgccatcagcaggcattgctggcattccgttcttccgttggtaattgagtcatacctgcagcatatggaggctgtgggacagca  
ggccttgggacagcaggcccagttgctggatatacactatacgtccgtaggtgtatctctcatataagcatcgccaggattcataatgtctaat  
aatttcttttatttacttctgtaactgtatactttagcagcatcacacttcttagaggaaaccgtgttcttcttattgacagtaatttcttctaa  
aaattccttaatttagtaatatgagctgtatagctgcagtggttaccaccagtggtcaatatgatagtggtgaaatggttaaatgctaaaccgac  
ggagaagcttctgactgaataaggatgcttggcagcttcaaccaagtttcaaacgacatttcttctgcttctgtgtataaggctactt  
agcgcagtttaacgtatatagaaatgtaataaacattggattgaatttgaaaaaaaaaaacgatggttccatttgggttcttttcttctt  
agatttctcagaaccaaataatgtaaatattatcaaatatctataaatcgtttaaactgaccgtttattctgtgagccagtagaataataata  
ccacttaggaagaggaattataagattggaagaaattgattaatagtaaggccttttgaatcggatagacgaatttagtaagttttatag  
aatttacctgaaacccggctgcttggagctagctcgaagattcatagttcttaaaataagctggtcctaattcatttgggtgtagtataccctct  
gacaattagccaaccttacttcttatacaagatttcttcttagagctagagccaaagctactacgagcaaaccaattgcagccaatttattag  
aagcaaaagagacgaacatggaggacgaagaattcaattccctaattgattcttattcttctgaactatttccccagaactcgaagatcttg  
agtctgtgtattaaatttgaagagaaccttcttggaaagcagcaatacgcacatctccagaacaatcgttatcaccaacaataagctttaaact  
caatcaatattatcgaccagctatagctgcggaattctcagtttctccaagatgttggaaattgcttattggattgattcaggaacaatggaa  
aatcaggcttaagtttgaagatgcaaaagtaatccttggaaatcacggcgtgtccaagaatatttgaagaataattgttctgatttctgtagc  
ttttcaatctaccagtttaggtgactaatacattcatcaccaggtgttgaataccaggaataacaaggaggactctacatcgccatcttccggg  
gatacttctgagtagctgggttttcaatttggctatgttggattcaaatagatctggagcttggggtgtcaaagaggcagaattgattgaagctaa  
aataaactatttcaagaggttaaacaccatctctacttttatttggcttttctaatttttaaaggagaaaaatattcagcaagagttt  
gtgaactgatatgggctaccgatttcaatggaaatcgatcagcttataattcgataggttaagttgaatgagggttccctgatactcatttcttag  
ttaatgaaactgaaagagataaaaagagtggtcaaaagcttggctgcaggaaatattaccattttgcatagaaactcaggactatagaagaa  
gaagaccaattgcaaaggtactcaaatattataatgggtcatgatctataactaataaggattagcttgttggatcctatggaaacttctgttc  
taaaattggtcaaatctaaatcgacttctatgcaatgccgagatcactggcagattatattcaatgtggagtcatttctgcttcccttggacgg  
aggatgagtcgaaaaaactcttatttagtattgaaatcaaacaccagtttccctttaccagttcagtgaggaaaccatcgccaagaagctca  
aaaatcgacataggcatcattgcaagtttaagatttattcccttcaacagctactccaataaagagcttgttttaccaggtgataattatgg  
atgatacaaaaggttaacgaaaattgattcaaaagcactcgtgatgactaacgatttaaggatcaaagagatgagcattgaaaaagaagaat  
gatagactggattcaaatatcagatctagcaggccggttggacttctaaagcttggaaaagcaattgaaaaataaaaaaagcttaattgg  
tgaatgatgagagtagtttctggttaagtgatttattttaaattgccttaactcaacgataattcagttttagcagaattgtttagatgt  
ttcattgcttgggtctgagaactacagtagtctatacatgaatcaggatcctcctttactggatcatctaatgcttaagactgggcccattg  
cttggcaattataatctgttctgcttctcagaatgatcagagaacgaaaaagaaatagaagatagatgttttgaacagtttctattattata  
aaatcaataaaaaaagctatcctttatcatgaacaaaatcaaaaataaaacaaaagaaaaatggagacgccgggaatcgaaacc  
gggaccttcaagttgcaaatatgcgaatgaaacgttatacccctaaaccacatcccattgtatgggagtagagattttagaattagatat  
agcaatttaaaagatttggtagatctcgtgtctttaaacaataaagtagcaggacaaatagataattgaaatgcttgggacttgaat  
tctataactttaaataattctagaaaaagaagaaccattaaaaatgtattctataggatatgacatccaaggttgcatagtttacataaa  
ggaactattaacgagaggacagcttatagatactactggttctgaattgaattagaagttgatagagttgtttttatacatttattatgtaa  
cttcttttacttttctatttcttcttcttggcagtagcagaaagagaagcagcttattgggaatagagttgcgaggagttcaccaccaagat  
atatggaaaatgccttaagagaatgttcagtcatttactccaatatcttttattcttagaacttttatttttccatattaaatataattatag  
atatatttttagaattgattgagattcattgtcgtcattgatatggcacctcgttccactggtccctaaaaaacctatcggaaggtatcgcccta  
gacaagattatctagaaaaagtgaaagtgaatccttccagtgaaatgaagaagaaccttcttcttctgcacctcgggtccctcctgctga  
atctgttgcacccaagctgaggatcgaaacgtcgttgcacaaacctgtgagcttcccagaatccaccatattttctagctgtgaaaag  
cttaataatgataacgagtcagcatcgaatacgaacggatgaagagcaattagtaacaaagcctaacggtagtgacgaagaagaagaag



cgaatcggaatcaacctctggctctgatgaatctgaagaagatgaatcgatcgtagaaggcagctttgcttactgcaccaaagttgtcgaa  
aaggcgcaaaaacccaacgaccaccggcgattcctcagaggctgctgaatagatcgcaagcaattatccccaaaaatattagaagaacta  
tacagagagaaatgaaacagagagaaatggaaaacacgaacgattataaaagacgtggatgatacagatggactaatccacagggtgaa  
tacgaagcttggcaagtaagaagtttacgaaggaagaaacgtgataagggaaaactttgtcttgaaaaagaaagaatgtcggtggaggaa  
agacgcttaatggacctgaagaaagagaaaaattggatagacgagaagctgaagaaagccccaagaaagaaaaagaaacctgtacaat  
tcctacaaaaattctaccacaaggtgcctttatcaggaccaagatattgttcggaatcgagattactctgaggctgccgaaggtgaaatccgc  
ataaggaactttaccaaaagccatgcaagttcgtggtaatacttttgattggctggacaacaagatggactcactggccaacgaagatact  
agtaaacccggatctgctggagtaacccaaagaatcctttggtcgacaaaacttacaacgcttaggtggactacatcctgatgaattaccgaa  
aaagaggaaaaaattagcatttataaccagaaacaaacagatttaatactatatacctgtataatgacccttttatggcctttggttacgct  
ttcaagtttctgactaccctcccactgtattgtatgtggtaggcctttagtttaacttcccacttgaggttatatcctcaaatgtaataa  
atcaatatgctgaaacgaagccattttcaacacttataaaaggaataagtagctttccatgagaagcccattccgattggcatgtatctgctt  
ctccggtcattgtcccaaataaattgcctacagttccgacaacttccatgtttctcacaggcgtatgtttcattaacggctcataagaacatac  
taacattcaatgtagagattgctcgtgccaaacttttgcgtgggtacagaccttagctccttgcgacgtttcgaacccgagtcagaccagcacc  
aagtaatttactcaaaaacaagtagactttaactcgaaggatctgatgaatattgtttatccttggaagcggagtgctacgtgcccaagctctc  
tctcatctggtaaagttacagaatcttctctgtccgtatatcctctcaagtagggacaactatgtgatacttaatatccagactccaatcag  
cttaacaagtgttaaaggaagagaaaactgaagatgaacaagcacaataataagaagcgtatgagaaaacaagagccttgcgtaagcgat  
tgggtaataagaagattgcaactttttgacctttttacgttgaataatgaaaagcgcgaattttaggaatccctgattccattatgcatcc  
ttctaataagtaatgcaagagaccagatttgtttcgaggttatagtttggttcaatgttcatataggttttctaaagagcatcttctgtttctaca  
ctttgacctatataatgcatgtgaaacaaaaagaatgatcaacgaacttctttggtggttagtaaaaactgtacatcaattaattttcttatta  
tgacttgaatggtagtcacaaaggccagatacaaaataatgccttaagcaggacagacattaagattgaatgaacgttttagagaaaacc  
acctagcatgaaatgaacaccatacttattacatttctgatatgctttcattgattcttattcaaacctttagatgtcgaaactattgat  
gaaaccttctgtgaatcatgcatgaactgcaacatggtcatcgcctaacgatctttgttttccgaaaagagaaaccccgaagggtcaa  
tagctgagctacaggtatatttagtttttcttacgaaaacacataatggatagggaaaaaagcttattttggagccgaaccaaacctctgt  
attataatatacggtaataatctcaagaatatagcagagccgtgatcctttagcctgtataccaaagggctctagaatgatctgttgaaga  
acaaaactcgtgctttgtccagttcgaagaataactaaataaataatgatttaaaccttttaagaatcagagccctatcgttaattgattcgttta  
ttgtgatctaaatgaaagatccaagacaagcgtttcagctgaggtaaagctgagtccttattgagtagcatttcttctgattctcaaaagag  
agaagaaactcaattgaatcccccggtgaaaacaaggttctcgttccgaaaccagcattcagctcattttacgatcaggtcgaatgtga  
gtgtctacattacacgcagcatttgggtcggaggagaatgcaataggagagcgtggaagtagcttttacgagagtttggtaataggaaaaga  
atagactatggaagtgcatgaacttaactttatgactggcttcttcttacgaagactggacattcttacgaaagaagattatcctgctattgt  
tcttcaatgttgagtagatcaactgtatgaggtgatacagacaactccttctggaacctgcccgttctcatggagctcgggtagtagatg  
atttctcttctcttcttttggcttctcagttatgcatcataaattttgcgtccgaaacatgtgctcgcgatcctgaaatccttgaatgtgt  
gcaatgactatatgtatctgggatgttgcattcattaatgaatgaaaccaaagtttgcctacgatttattcgcctatgattgatgatactca  
agcgtcaagacatgggcaaaaggtcaatgaaggtatgattaagatgaccgtgctgaagttctttcaagcttccattatgcaacattctattt  
gatattgattccggcagtagcagtagtctcgggtcctcaagaaggagaagatgccgaaatagtcattcattcaacttatggggattgttg  
tggaaatagacccctagtgcaatgctgcatcaaaagaccggtggcgtcgccttctttgactaaaatccgttagcatattttctttatagaca  
tgtaaatttttctactaagatattgctattattatataagaagagctatacagatatttttttttcttttttagattacgagttccacgtgctg  
tactttcagtgcaacttcccttactaatgtaccggttagaaaacgaaatgaatgaaattgataagacaaggaacattaccatttcttttgaag  
cagttacagcagataaaagcataaaagacctaataatgataaaacacataaaaatggatcataaagaatagggaacgataaaataccggctagaat  
tagaaaacaacaatgcttttctgaaaagtagcggcaaaaatttaaaacaaaaaacgataactccaagttgcatcatttaagattgtaaatgaaga  
gaaatccgctagatgctgattgtcattacctgatagcagacttccaccaaaggaagataagtaactgagagcctttctcagcaagag  
ccgaagcaatctgttctggttctaaagctacggattgaatcaaaagcatttccagccttatcagagatttcgaacaatgtcggcggtcctcagc  
ttcaccctggcacgaataatgtagcctgtttcttctgctcagctgttcgactaagaatcgagcccgtcagcttctggtgagcaatctgtttccg  
ttcaacggccttggtaactctacaaaagtcatatgagtaatggaaacgcttccaaacggataccaaattcagtgccaggttgaacaagttc  
ttgacggattttggctgataaacctctcgttgagtaatgagttcagcagcatcaaatgagcaactacggattcaaaatttaccgattgaa  
ggaagcacacgttcgtaatccaagccaagactctgatagattggaggaagcatccaatctcaggacgatcatcactcgaagagatcaatg  
ataccatttgaagcttctactgctgtgtgtaaatgttctggagcgtgtcgaacatcgtacacaatcgccttttgaaccaaggaactaa  
gaaatgttcttctgaacaacctgttttgaaccagaaagtcggtcaacaatactgctttttccacctgaaacatcataaattgaagat  
tgaagcaaaagtaaatccaactaattggaatgtcgtattttgctattcttctactactaaagccatttttacaactctccctttttattggtact

tgatgtttggaagaggtaactaccaatccttaggtaggagtaccggcggaactctgtctttactcggaacctgaaataataaaccaaact  
tattaaattataataaattataagaatttagttacattataaatttcgccgtttgaggtgtccttctctggttgaccgttaattaccct  
ttccatatacttgacggatttcgaagcttcacgaattgacttaatttgcaaaatgggtggtgctcctagtggaaaaacttattgtaagttcatata  
aagtatacgcgatgttgaaagcgagcaaaagacttattttgatcgaagctcggggaatgaaataagtcgcttatagcggcctcaaacggcctaga  
aaagacgatattttggaatcgatcttcttctcatattgctttcagctgctgctggttgaattcgggtttgtaagagttgaatactaa  
cttgattgaatagaggctgggggtcacctgtatgtccatgagtgcttaagaagaagcaaaaggcttcatagtactacaacagtttatgtg  
tgattggtttactgactagaccttagcgggtgctcaagcaaaagggtatcattacctacacctgtcccctttcaacagaaacctatggctggtt  
tcttgacaagctcttccgaaacacttccgctgctccctaacgaaggtctctatgtagctattccggttggtgcttattacattactgctgggg  
caaggaacgaaatgaattttgaaactgaaatggggtcgacacgtaagtaacaattctccatccattggcatattcactactatgtgtacatggtag  
tgaactgttactaacaggagtacagttggttcagaggagtaattgttgatgacaatcaactctttagatagaaggattttgcaacgaatt  
taattcttctctctgctttttcttacacttccccctctcgtgcttcatagctgaattcatatacttttctaactgattatctactgccacagt  
agtaccatttgggtatggaatgaatacaattcattctatattaattctactctccattgtaactgtctatgtcctagattaatctttggatcca  
ataaattaccaagtcacagcaatcgcgtcttctcactgtgatcgtgctcagttggatctcttgcctcaatacctctcgttagatatttaa  
agagtatcggaaacggcgacctcgtctatgcttatacaaaatagcagatcaatcactgttcatgaatcagctcattgcatcagtcattttcg  
atccatgcccaataataattgtatttctgtaatgcccaattgctcagctttcatacatttctcgtatgctgattccagactccaattgctttact  
ggttattccactaaaactgtgttcaaacctcagaacgtctcttgggacgaatgaattgattcaacagaattccttcttctgcaactactgtaaat  
gaacaagttcaaatccaaagtgtgtagcaaaagttcacagtcacaacgcacaatacattcttcttccctgggagtcggtcgacaactaacgt  
aaggcgaaacattgtcaaatagggtaatgctgatcagataaacatgaaactctcactgtacatcctgatgactctccttcttctcacttcgca  
acaggtgtatacacggatttttctccaccacttttctcgaagagtttcccaatgatacttacaaggctcgtgaagattcaaaactttgttc  
acatcgtacactcccgaagatcatccggctcagatggattatataccaaaattatcccaataactcaagttgctgctttggatgaact  
aacttggaaatcagatcactcacatcttcttctctaaaattccttaggcggtatctttaaaggcaaaaacttggattgcaagaagagctg  
tataccatttctgatttgggataagcagagattttctcctccttagggatttcttctgcttcaatcgcatcgtatccaagtttaaaaagcat  
cataaaagatatggaccatgcttttctaagttcatgacctgctggagcgttagagtcgtaaactggattggaatggccataggctcattcatagt  
ccgcttcttctcagtttatagcgaacgagtcaggcttctgatctctatccaatgctggttccgggggcttcccttgcggttgagaggcctt  
gtcttccagtaatacagaactcggagattcaattcattatcttctgcttagtagattggtctccagaaaatgattccttaatacctgtttgact  
gagggtccttctaatagcgacagtagccttctttagctgtagtaaaagaagatgggacatacgaatctgagctgtgtacacatggaggaca  
atgaaaggggtgattgtctgaatctttcacgttgattcgagagtttcttctgtacatcgaaacaagagtgcccttattgtagcaaacatct  
gcatgcttgaatatacagatttgcagggcacgtttgatcgtcagcagcaaaaggacagtttatgcttgaatggccaagtgagagaacat  
ggcaaaaactgtgtgaccaaacacgccttagtgaagtagaaatttggctgctgaatcaattactagaagtttctcattttaaattagttct  
gaatagttatataaattgaattgtaaggataaagtattaatgaggtgaaataagcctatgagttgtaacaaaaccagttcgttattaccatc  
aattcgacattgctgacttctatgtgacttaaatgcaattataattacaagaaaagttcaagaaaagaaaatataatggaagatacaacctt  
aatacagaaaagaatggtgaagtgtgaagtagcagtgtagaaggtcacttcttgggaggcaagaggtatccgaatgcaagagaacatat  
aaaattatgttctaaagaaaggttgggaagcataaataaggattataggaattgaaataaaaagataacatttcagtcgaattcgttgccttc  
aaattagaaggttattatggttaagacattcagtaggaaatataagaaaagagccgagatttgggagagcaggcttggtaatcggccattaga  
cgtactgttataagaacatactggcacttctcgggttcttcttctgtatgacctgagaggagaagtagtaccattccaacgtccactggacc  
tccgagaagaactgcctgaaagatgaagaaggagagcgaactgaagattctgggggtggttggctagaagacctcgaagacgtgctacag  
agattgttccgtgggggttctacagattcggatctgtatcttgcctccggtttggatctcagccttctgagtagtcttctcattatgtttcat  
cgttagaagcccgtttagaaactctgtaattttcgtttaatcgagcagaggtggttggtaatcgtgagggggaagccatactatgatgaccgg  
aatcttacgcggctggcctggagtaggctcgtgtaaggagtgctaaactttctcgcgcaaacaccgttggatgatgaagcgggtgccttg  
ggggagtcgccagtggtcagtagtaatggctgttgaatgcttcccatagccttctcatagtaatatgcgcaattgaaactgattaatatgc  
aaccagtctgttggggaccaacaaccattccaggacgcataattctcatataagagattactcgttagcagtaaagctatgcttataaatcagg  
taggctcaattaagcaaccggtacggccaagaccagcttgcagtgtagcagcattcctcctctacctcttcgacgagatcaataaac  
tctttaccaaggaagctcgggactgtaccatcttcaaaatacatttctgatgacgaatgccgacggattcaaacgtctttgtcgataaag  
gaccgtcagtcggacgactcgtttatattttgtttaaagtaatttaacacgataaggaatggttgaggagatttctcggacgagtgctagg  
atggttccagccagctgaattgactagcgaagcagtaattcgggtgatccaataaaaatcgccgtttcaacttttctgtaggtctcact  
cgtgaacatcgtatgtccgtatattaagaataaccgttccctgctcctcaataagccatacacacagtcctgaatggttatataataatctgaaac  
agcatagccagcatctcgaatccaagaaaaggagctctgcttagccaaaggagccaaagccaaatgaggaggccagtttgaacaagaa  
ccatgtagcatgcaaaaagacaagctgatttctcgtaaacgggtatccgtggacgaataaagaacaattgttttattcttctggattgctgatg

cttcgccataattccatgaacaatgactgcaaaccgaattagatgactcacgtttaatggcctcaaatcatgatagaaaggattgtaacaagttc  
atcatctattgagaagaagtgcatgtgagggtataaagcttcattgggtggtcctaaagatgtaaaatagtttgctacatagtcagcgta  
gtatcatgaaattcaagaaattgtagaaaattcaaaagtaccttccaaaaactcaatcattcaccagcccacatctcgatactccatagga  
ttcaatagcttataatttgagaacgaactatggatactttgggtttttcaactttgacttggaaagttgggtgagggtccacaggatataagaca  
gcaacctgtaggaaggaaaccagaaagaagaattgtgaggaatcaactgatataaataaaatattgaaatggaacaaagagggtt  
gtttggctagtaaatggaagttacttttagtcactgtctatattggaaacataagcaaaatctaaaagggtgacattgtcagctcgtcaa  
tattaacagcccattggattgtttgtttggttcaaaagaagatagattgatttggatgattcaaaagttcatattgacgaatacattgaga  
acaatatctcgataggtatcaacagtcagtcaagtctttcactcgaataaataaactattttattcttctcatctgttactgtcattctgcagg  
attcatcacaagaagttctttcaaaacacacaaaaaggggtgtagaaacaagcatccaacaaaactgttctgtaactaaattttattgtt  
aattcctaaactatccgcaaaaaagaaagcagtagatgaatggaaatgcaaggaaacgaaagagagaacgcaaaattggaacttaggga  
aagacgaaaaggagccttattcatgatagaaaaaggttcaatttcagaaaccaagataaagatattttgaaagtaacaaggacagatg  
tctgccttcacaatgaaaaagcaaaataagaaaaataaataccaaccaatttgactcaataagctaatcttccagcaagagcttacaataa  
tggaaatcatttccgttctgttttaagctccaaagcggggaccttttagaatttctcgtgtagtttctgtaatcttctgcttggccttccaaatcttc  
tcttccaccaggaacgaccatgacacagctgggtgggacgtttgggttggaggcatctccaagagttccttagaaacctatagacgtagggg  
acatcgttcttcgataagacaggaatatgggagatgacatccaaggagaaatgacaccagcaagaataaccaagcccctttcacctttacg  
aacagcctgaccacctcctgacaccacggaggatgtgttttgggtgaggcctttcacagtttcatcatttttattgagcttcttaggagcc  
aaaggttgggctgattggcatcaacgcagggaggtacgagtcatactcctcagaagcaccagagctttacgttcttttcttcttccattgt  
gaagtaaaaaacaaaaattgatacaatgaattggctaaagcaggtttgtaaactcagattttcacctttccgtagctcgtatgccgtcgt  
aaaggacctacatgtgacttgcacaccaggggttcgtatattgatgctgtagcagtagcgtagaagcaaaagaacacgggtgcgttctt  
gtactattaccagagagcgtagcacagcattgcaatgtggcattgcttagagcacggaatacacaacctatccaagtagagccggcagga  
gggcagcctaggctaggaaagcaaaacaagacaagcatcagagacgagacgaatgagaacggttggagtagatacgaataagagaa  
gttgaataaacaacaaatcgttcttttttttcaagaagagcagatatagaattcagcctacaatcgttcatcacgaatccttatctgcc  
aatctactatgtatgctatagcttttcatcagactgggtcatagctcagtgtagagtaggggattgagctccccaggtcactgggtca  
aatccggttggcccctgttttatatatttttcaattcctaaattgaaatcaagaaacgagaatataatattataaattgtatcggctga  
gtaaatacgttttctgcttttctgttagtgcgttcaatttatagaggaggcaagcaggtagggcagggcctactaccattgctgctgctgt  
gttttttttcttcttcttctttaccatgaacttatgtcatgaaaccacaaaaaaaataaactcgaaccataaccgagacaa  
attaacgttcgatcggccttgcgcaatcattagctctattgcgacattcatgtgactgtcgagtattgacattgacggaaataagaagga  
taaaccgggtccatcgtattttgctcctcttattgttctttttcccttttagcaggtcctttttctggcatactccttggttgaggtagttg  
ttgcttctgtcaccgtagaactgcctgttttttttttctactccttcttgaattcatcctttgttttctttataatccaacattgtacagta  
ccgtacactacaatagaataatagaatacaatagacagtgaatggctaccaacatcactttcatcctggttctgttaacagagatgaacgt  
ccaagttcttaggtcatcaggcatgacatctggctgactggcttatcagcctctggttaaatccaccattgcttgtctttagaacaatacctttg  
caaatggattacccttaccgcttggcaggtgacaatgtgcgtttggactcaacagcgacctggtttagcgaaggatcgaatgaaaat  
atccgtcgtattggtcatgttgctaaactggtgctgacgcttctgctcctcatccttttcatctcctatcgtaaaagacctgaccaagctc  
gtgaagcccaacaaggaatggttaccttcatcaggtcttggctgattgcctgttaggttagctgagcaacgcgacccaagggtcttaca  
agcgtgcccgtgcccgtgagattaaggaattcactggcatctcgcgcttatgaagctccttctgctcctgaagctggttctcttccataatg  
tccactgaacaatctgtgaaaagattgttcttattgcaagaaaaaaacttgattcattgaacaattaatccttcttatgctttatgtttgt  
tcatgtataatacctaataatcgttattgtgtcattcctctgtatgtgtgtgtgtgtgtgtgtgtgtgtgtgtgtgtgtgtgtgtgtgtgtgt  
tttttttttttcttataaatgctggttgatattaatcagaaattcacttcgactttcagtcacatgtcatatgcttaaaaaatacactgaaaaa  
ctcatcattgtaattcatcctaaaagcagctccctctaaaagccaagccatagccagaacgttgatttctcaaaatcatgaatagacgagc  
attgtagaccaaccaacaagcatcaagagaccaccaaggagtacaggaccaagaatttacggaaggacgatgctttggtagtaacaca  
agagcaaaagatgctcccagaaacagctactgccaccaatcatcagaggagtggtccatcttgacctgccatactgggatggagagagatgg  
ccatgacagctagggaatgaaacatcaagtaggtacaaccgtggaccaagactaatcgttagaaatataaactttataaactcaattcttctc  
ttccttcttttcttactattccagcaaaactcagaatcgttggcttacctcaataagtgagggtctgaaacgcttttgcaagccatgagag  
ccatagctcctaagccaacgctaagcctatattgttaatggaaggatgctttcattgatctgtattcttaccattagagctgctgcatt  
ccagactgccatccttataattcttagtcaatgtacagtaactcaaatgcttttaatttattcaatcaattccaaggcgttttgactttcg  
actttaattgtcgttgtgaaagaccttagatagaggatagtgaaagatcaaggctgtctgcctgccttggcaatgtgagagttggagctt  
acaagagattcctgtagatcattcatcagatttttttataaaatgatattgaatttacttctcactttcaacaaggctcagtgctcatat  
ggaaaagcagcatggaaagttcatttcatatcatcaacgtaaaacggaattataaaaaataaaaacagaagaacaatataaagcctaaaa

acggggttttcttattgaaattgcaaaaacgaggatatttatatacctagtagcttccatgtccctatattcgatattttactgcgtattgaaaa  
ctagataaaactgactatcacaattgatttctgtatacctaaaaatagaattaatgtctctggaaacgtccagctcgattttctgaaattctgatact  
caccggagaaagaccctatcgtcatttcaataagcgaaatgagccgtttcaaaaccatttataatcatcgaaaaggattcttcaacat  
atggattaaatgtactaatcacaagaacaatagttgagggatggaatgctactgtaggtgaagagtttgctcgagttgtaagtaacaaagcg  
atactacgttcgttattcaatctgttgaatttcaaaacaaccttttgcactctactccatctcctagtggtctgataagaatttactcggctgaattt  
ccaggattgtgattaccaatctgttcacctaacaatacctatttctgtatcctaagtagctccaacctgacttcttaaggataggaaggaaacttt  
cattcatataaaaactcttttttggacctttgggaaaaatgaaccttccgttttcaacctgagtcgtcttattcacattcttataaaccaaacatttcta  
gacaaactcaaagtcaggtaccccaagctcccccagcccaaacccgagctacaataactaccaacctcacaagtagccttattccttgcct  
ttgaatctatacaagcctcccgtccctgagaagcctctagtcgcatagcatgtcgagtttctctccgtcgacagaaaaaatcttctgcgaaaa  
ataaggataactattctagcctagctgtccacctagaccgctccctatacgaacctcgtccaaaattctttgcacaaataacacttcaaaaga  
ctcctcttctacaagctctagagaagcaagagcatcactctcaccagtttgcctccgaaacaaaagttcccccgcttcttcaaaaccacac  
ttggatgattcgtttcacaacgaacacaaatgcagtcacctcaacaagtcacagtgaaattattagacgaagaaattaatttcccattcaa  
cctccaaatcatgaggataagaaactagaagttactcaaaaacgtttggatgaaacaaaaagccgatggaaagagaagctcgatgcagaactt  
atgcagcaaatcaagacatttcaagccttcgacagaaaaagaattactagataatgaaaaagcgttctgtgcaagaattggcaaaagaaatc  
gacaggaagcgttttctggtggaatgactaggagaaagctcaaatgaattacgaagaactattacaattgaaaacttaccgatcaggaggt  
tgttcataataccttcggaagcggataggaaaaagtacaaactgagttcgaatgatgctatcctgaataatagcatacaagccttgaattcagcat  
tgactcaagaatcaatttctgttcatgcatggctcaaagcggcgaagttacttgctaggaaacagtttttgttcgacgatttgcttcatctatag  
atggatattgtttataatgaaatgctttatttattcagaatcgtatcacaataactcggattccgataccccctttatcttttcttttcttttctc  
tgaagttagcatccaaaaattcaaagattccatgacttacaatcatcacataaacaatgctttccagtaagagtaataagcttagagttaaattcg  
tataaaataacagaggccttttaaagataaaaggattagagttgcttagaaggacaaaaaagactgagcaaaatcccaagaaaaaatcacgac  
ttttatgaattagattccccaaaaaagcaacaaacgacacatgagaaaatgtggaaggtaaaaggttaattccactaagaaagatgaagaaa  
actcgagataatgaatagcctgaaaaagactgtaacaaaatgaattttgtaggagtcacaataatgactagtaggtccaactatttctcattt  
tgtgtaaggaacggatcattgaaatgaattgtaggaagaatcataaaaaaatagcacagaacctatccttgaatttcttatgcacgta  
aacacatagtagcaaaaaataagtctattgaaacatacataaacagagtcgggctacttcagaaaagcttgaacacataatctattacttagc  
tgaaaaactgctttagaacatcatatattcatttagcattcctgtctgtaacaaacagtcgaaaatataaataacaattctaaggttagtgctc  
aaaattaatcatggattcaaggaagattcaagtttttagttgaggaggttcaaatataccttatagggtccaaagtttggagataatgac  
caggaactaggatagctagttgaaggatttttagtttctatttctattgagcctaggaagagtgccaaaacatccaaaataatacaaatcgta  
atccattcaacgcctttgtccttgccttataaaatcatctttcatgactgtatgtgaatgattgaaagcccttctctagaagttttagtttact  
gaccttgatatctctgcttttgaagtataatgacttgattttgtattcaggaatcaatgactttttatcttataatgattgtaaacctgtacttata  
caagaaaaccgacagataaagtgaaatgcggatcttataaaagtgtataaaagcaaggcatcctattcgagcaggaaaaatcccagatt  
ataattataaaacaaatacaatagaaacaaaaaataattaagcgtattttactctatttattacaaaactggtattcaacaaaagtgattgt  
aaaagtccgctttatctcaacaatcttagtacaagctcataaaacttggaaataataagaaaagctaagagaaggaaaaataaccttga  
ggttccgtctattaggtagactgcaattgcgacgataagtaattgacattctagacaagaaacaattgtagtaataaaaaaaaacttctatg  
aatttctataaataagaaggatgggacgaatgggtataaaggtaaatcttttctgccatcttaaccaggatgtatgaaaagatttagaggtt  
gccttctgataaatcaattttaccagagataaaacaaagatcaaacccatataattacatgaaacaaggaacagtcagttgtcggttgaatcg  
agtatccatctcgaacatgcgagatactgttttaatttctgtgtagttacataatcacgcagcaagtccttcagacgaggaagacaacaggtaa  
ctacttctcaataactttctcgtctcgggtccacaccttgggctgcaacaggctgctgtggctgtggttgttgttggatgatgctggtagggag  
acgcatgtacaggttgaggagatgtggaacaactccatggggaaaaagaaacataaattcgtccctcattcacctcgggtggaataacgaaaatt  
gtttgtccagcattgtataacggcaggcttaagctttccacatgaccgacactatgattgcctttgccaacgatttaacaaactcagtttagtg  
gctttctttccatctttacgatagtaaatcttacacatgtaaatgatcttctcctctctggatacagttatgaattctctgtcgaacagcttgaca  
gcttctgtaatatagagacatgtaaatcaagttcatccggttgacaatgagatattttgtataaatagatcgcgtaggcagctttcatgttagttt  
cttgtattgaaatttgaacaaataaacaagccggggttctcagcaagaaaatatgtcacaggaataactattttcgatttaataactattttcta  
tgaaggcagttttggacctttcagccttcagaatgaaaccttaccagtagctcctcgttaggtcacttcaagatgtgaagtcaagactaagag  
caagaattgtacatacctttacgattatattcttccattttctgtccacatttttccccctttggcttagctcgtgagcttctgccttctgccagaggc  
ataagcctgtggccatctgaaaaaatgacctttttcagcttctccaccagctaaatgtctatattttcatactaaagcaaatagctcctat  
ctcttcaagatcttcttattttcttacctcctcattcctattgtaagaggtattgtattgagaacaatggataaaacaataccttcaaatgg  
agcccaagacaatgaatagattcaagcaaggtataaaagaccatgcacatacatatttttccaggaaagaaagtaatttttctaataaag  
agatccattgcgaatattcttttctgttggaaatcgtttgtctgaagaaatcgttctgtcgaagaaagtcacggaaactgagtcattcgtttatt

ttacgaccttttctatTTTTGGGAAATcattgtgcattctaaggatttGTCCTTtacgcttctcatttggaaccatttgggttggaatTTTgtgc  
aacgacgtgaagtggccgttgtaatTTTggaacactgtttgatcatttacgtatttatcgtTTTTgcttatttgggttcttgggaattccattgatcatc  
atgagagaaccttgggtgaaaaactatcatacctctaattgggacactctcagtatcaaaatgtatctatTTTatcgacgcagggatcaattcaa  
gttccTTTgagcttaatcgacaaaaggcgagcgaaccggattctaactgggatgacagtatccgctcaattagccttaggcgttttgatcatggtaa  
tgagtaccttcttcatctcctgagaaaaggaggacgcctgtattattgtgaattctgctagcattgtctctatgtgattcgcgctatTTTgatgat  
tgtgaatTTTgtgcagcaagagttacagcctcgtggctcatgtatggatttgcgctcaactgttcatgaatatgttcatgtctTTTgatgtattggctatg  
atcgttggtagcattatcatcattacagcggaaattagtagtctTTTgcaaattcgtatcatctccgcacacgataggaagactcaaaggatcatga  
cttgatcagtgctggtagggcttTgtgtagtggctTTTTggtttaccaacatgtgctagcaaatcaactacTTTTatggtaattccataataa  
ccatcaaatTTTctggatatttgggtatactTTTatcgccaagattctTTTgctatcagcgttatattcatagtgctgctTTTTctgacaagttgtcc  
acgcaatacagattcgaaaaaaattgggtcaattcTTTTggctctatgacgtgtatttaattatcagctgcaatgcttattTgtacctgctatctt  
tactattatgatagctTTTattcacactacagtggtcagttctatgaccaatgtctattaattttctctccgcttccagtttagggcgtcca  
gcactgcattaaagctcaaagcctaaaaactacaacttctcctggtagacgactcaggttctatccggtggaccggacatgatattaaac  
gtattcctactgaagagcttccagtggtgatgagctgacctcaagaagtggccctaaattcTTTaatattctTTTTgcttccctctctctTTT  
tattTTTTgtgaaatgaactTTTgcgatcctactattaccatcgttTgtgattaagtttatgagtctattcatgttacgggaaattatgcgggtctat  
gaaccagttatTTTaatTTTaatTTTaatTTTaatTTTaatTTTaatTTTaatTTTaatTTTaatTTTaatTTTaatTTTaatTTTaatTTTaatTTT  
attctgtaattacggatagagctTTTctctctgtgagaagggtctaattctgTTTaaagtaaaattTTTTacagtcacaaactagggattTTTatt  
agattgttctTgtaccttTcactatgattgattctatgctTTTTTTTgttTgagttcatctcgtctcctattcagttcagaaggtatTTTaatTTTgt  
ttagtataatgatttcttaggtttatcacatggagaaggaatcaaaaagttggccggtTcaaacggatgggtcctacaacatttctccagagat  
ttcgtctTggactTTTTcaactaactagatcttagcgaagaaagataaatctTTTaaactTgtaattatctctgtatctTgatttatacatttccatt  
tcattTTTTctgtataaacaataaagatgatattTgtaggtacaagtcgaggtacatgtatttcttaggtTTTaaagtatactatacgaat  
aatagagatgaacgtTtTaaaagattctgtaacctTTTTatcTTTaaataaagacagaaaaaggataattctTTTtagttaatacaactTTTgtag  
TTTTctTcacttTcactcaataactacgatggaataggtTgatggaactTtctTTTTcagatggctTctctgtatttctTTTTTcaaatctTca  
tagaggaagggatgcagttTctTgtatctatagtcgattTgtactTTTattTgtTTTTTTTTctTgttattTacaagtgcattTg  
cattcaactacgttataaaaaactcatcagtacgaaacacctcgaaccctacggtaaagctccctattcaattgaggatcagtgacgatgctga  
aaagtagcaatgaaacacacctTTTaccaaccagaagagaagtgagattTaaagaattTgcggtcatcatggcatctgctccattgtattgat  
aatggtagctggattTgtcaaggtaaagctgatttccaggatTaaaagatgtagtctgctgactgaagaaaacataggtcgggtacgctaaagac  
aattTccgctcacaattTccatcaattgtaggtagaccaattTtactgTcagaagaaaaaacaggcgatTcaaatcaaatgattTggtt  
ggtagtaggcagaggcgggtgagatcactgctgcaagtcaagatcccatggaaaatgggtattatccgtaattTgaagagatgaataattTgtg  
ggactatacattctatgataaaattTaaatTgatagcaatgggcaaaaatctTgctTcagaacctccgatgaatcccgctcgaatcgtgaaa  
aaatgtcgaaccatgtTtagcgatacggTTTTggcggtgtatTgtggccattcaagcagcttatctTTTatgctcagggactaagtgtggt  
gtggtcgttattccgggtgatggtTttacacataTgttctTttacgaaagTgtcgtTgaaTcacctTgttggctgctTggacgtTgcaggaaga  
gatgctactcgtatctcatcaattTgctTTTcgaaaggatagcattTaaaccggaccgctgattTgaacggtagcTgaaTgaaagaaaa  
ctctgttatgtcagttacgatctcagctTgatcaagcttagTgaagaaaccactgTTTTgatgcTaaactatacctTgctgacggacgattat  
TaaagTgggctcggaaactTTTgaaTgccctgaaTgtTgtTccagcctcatctTgtTgtagTgaacaaccggctTaaagTgagttattTTTaat  
aattcaggctgcagacgtcagatTccgtaagtattTgatcgtgctattTgtctTctTggtTgtagcagTatgatgctggctTgcctTctcctgga  
gaaggagatcaagcagttTggtTgtcgtgctTtagcgatccatctcgtTtacctaactTcaagTtTaaatTgaagatgctcctcgtcgtc  
gccatgagTattatcggTggtccgTcctTgccgatattTggcccagaatgatcatatTgggtTcaaaacaagagTgggaagagTatggtg  
ttcgtgctTtgataagctgggacccgTactacTaaactggctTTTTacgatctattTTTTgctTTTTccctcaggaagaaactatgtgTcc  
aaaTgTTTTacTTTTctTTTtacgaaTgatgtatagTtgcattgctTTTTgctTaaagTtgataaaactTtatcattctattTctgTaatTTTTcatc  
gatctgacactaccgTTTccttagTTTcgaatatcaaggcatacatagTTTaatgactagataactattatgattacaactTTTcaaatTgaatgc  
cgtgatattaatgctgTcTgTaaatTTTTctgaatagaaattcaacgcactTtcaaaagattaagctTTTcattcaatcaaaaactgTgatTaaa  
attaattaacaatcacTaaatTtTcgtatagaaaaggaaaaaaatataTgcataaaaaatcataaaatagaattaaaaaagaacag  
aagaaagaaataatagaaaaaacTcaaaaagaacaactaaaagcatcacctcggTtaggtatgaaaataaacTgacaaaggat  
gacaatatattTaaagattcgaagagagagaaagaaaaaaagaataatgcgaagaaacaagTTTcaaggaagagccattccttatag  
ataagatgTaaatTgatacaaaccaataagacaattTgcacaagacaagtcaagaagTgtTTTccttagTctTgtatTTTTggagTctTct  
tagTctactaggtacTctTaaacattatccacaattaacattgctgaatatagattcttagcaactgTcattTcctTggaatggagagctTgt  
aaccaatcaagctcgtattTgcaaattctgattcgtaatcattgataatgtagacatgTTTTaaattTgcataagTggcgaggagatgcaactgga  
atTTatcagttataaaataaggcTctcacttagcagaggctgtgcatattcaagTaccTgacctgctTgtTcaaacgcTcgagttTgcagTgat

aattttacggtcctgttcgggaccccagaaatgaagcgtccaaggatacttgatgtttctcgaaccagctattggaacactgtgatccttagataaa  
ataagactggcactataatgtgacattttcggttgtgaaatgatctatgacttaaatatgaaattgaagaatcaggagcaaatgtaaaggta  
ccagccccagaacgtgctatctagtgtcttcggttatgcgagatgatacaataagcatctggatgatgacgcatagcctctagtgcattgctgc  
atgtgttcatctacaaaaaaggataattgacagggaaaagaacgttagcttgatcgacggatgctatcgaggggaaggctcggaggaaagacaca  
aagtcgtttaagttgaagggatgtccttgataggagcggcatgaaggacagcagagtacagagggtgaagttggttaattgtcgattagcgac  
cgaaaggttaaagtgacgagggcaggattgataacgaacggaaatattcctttccttcaaattgcccattgtccaaaaatagacaaaaagttat  
cagagtacgagtcacggcaagtgaacaaggaatcacgaacaccagcagctggcgatccatgggtgataaaaaacgtgtctaagat  
tttcgaggtgtggcgctacggaagaagctgcatacgaatagttggcaagttgaagaagcggaaaggagatgcttaaag  
aaaagtaaagtacaaagaaaagacaaattagaagtaaggcagaaaagtcagtttccaaaagttcggaggagcagagaaaaatctaaatttt  
tcatcatatataaaacaaatcaatcgtagaaaaaaaatagcatataaaagcaaggacaaagagaccaagcagaagcgaacgagcgga  
aggcaaccaatgaaagatgattctaagaaatgttgaaagcaaaaaacgaatcaagcatgcaaatgaaaaagaaaagtaaagaggctg  
cagactatgtacagatttctaactgaaagtaaaaagagagacaattagcaagtcggaaagaggattccacgacgagaaaaacagtaatgtttat  
actggtataataaacgcttactgatgatcacgaacagaatagagaccgtaattctgttttacggcacaaaaacggcagagaaaagaatc  
aggccaaaggatgactaaaggagaaaaaaaagctgtaataaaacagccttctatttttcctttattttttaaaattttttagatagtaa  
aaaccctcacgcaatgaagaaaaataaagccagttaatcgaatcaactccacaagaagaagacaagaatagaacaaaaagatttt  
caaatgagaggaaaaagtggttcccaaatctcaaaaaagcgatcctccaagaagactgcagaaccagaaaaccaatctactctatttca  
cttttaagaagccgtttacggccaagtacagacacaatgaggagctcttaagctgaattcagaacagaaagaaaaagcaaaaataaaa  
tggcgtgtttatgaaggaatattgtggaggaatggttcggttagagtcgatttctcctgagataaaaatcttaagaaacttaaggaactta  
aagacaaccaagcttatctaataatgataatgtcctacaatctgataggaaaagaaagagaatttctactagaacgagtttatataccaaa  
aaataaataaataataggaatctcgtattctaataatcaagaaaagagagctgtaacgcgagtgcaatgctgtgatattttacgcttctc  
ttcatctggcgtcaagagtaaaaaacaaacatcatgtctagatacgtctagcagttttctgtttttcttttcttttcttttcttttcttt  
tacttgggttaattgggttcttttctcaagaccgacagtggtggaacagagcgttaatacaaaaacatcattcttgatgattgatcgttcgtaa  
agattatacaaaaggtctcgtgtggggcatggggttactcaagtcaggatggtttaaaggattgagaaacagtagatagttgggggttacagtt  
gctttctacaggaaagagtatacttgggttacttgggttacttttctgtaggactctgttttgggatgagcagtaagcttgcatactccatccact  
gccttagggctattttcgaatctcaagttttatcggtctattgattttatctttgattcactccattaacgttctttctatctcgtcaatctac  
attctatcacttctttatatttttcaaattccttataatgaggattttagaacttctaatactctagataaaatgtttatgctttgaatttacatt  
gccttttttctttctttctcaaacatttataatcaatgagtcgacctccctcttactgggcttctatagttctctgagaccaagactatg  
atgacaaaaatcgtattctgtctccagctctcccttgccacctttatcatctactccactatccaatcctctgagccgaaggacaaattgaaagtc  
attgattccgaatcccagctacttctctcctcagcccctcctctcgtttgaagatcttctttgctgttgcatacaaatctgtttgcatcctgt  
aaccattctgaataagcaagcccttaattgtgtgagccctcttaagctttctcctcaaatggccttcacggctactatggtcaaggtctatt  
ggcgttcttctcgaatcctctcaactctacatcttctcgtgaaacagctgaaaaaattcatttctgtaaaattttaggtatcgttagcaaa  
acatactgtctctttgtacctgtctttttaccaaatatcgctggcttactgttgccttcacgattctctccttctattgcttcgtaaaaa  
accatattttcctctcactggctgttttagttatgcttgattgttttgggtccagtttgagcaacagcttccctcatcggggctgcattggg  
catttggagctcgtttacaacagccattgagctgtcgtgttaagcattacgttcatgagtttctacttttgatctctttatataatcgcaacctat  
atgtctgcctttgtcttttccgttttctctcgaactttcaatgctgcaaaaactgtgagtgagcgggaagtaaccaagttctcttattct  
ccttctgctccttctgcttaattctatttaaatattgcaacctttaccaaatacaagtcacctccctgtttcttatatgattctgttgcagctcgtg  
gttcttcaacaattttgctgttaccttttacagagactctttatgtaaatcgatttacgggtgctattctcattctcggcggtaaccactctac  
acgcttgcaaggaaacgcaacgccgatggcaaatcaactcaatgttcaacgatattttctatttttcttttcttttctcctgtttg  
tatgctgcctttgttctttgatcttcatgttttaattcgttttctgttttccgttttattcaatgagtcgagaaaccttctgtttgcaattttctttt  
ctgtttattttctgtttctttctgtatgtttatcatgaattttttaactttttcttttttccatagcttagcttttcttttcttttctgggctgcctaa  
aattacaaatcataatgcaacatgtttaaaagtataagacattcagtagtaattctcaattgttttcttctttttgtttttgttttcttttag  
acttttactttggtttttatttactgagttactagctctatttctagcccaacaatatctactttgtttacataacgctcctcataaaggagatct  
acaagacaaaattggggaaaccactcgttattgtttgtttaccttactcgtttccttctgttacatactttacgctgaaagcaaaaacatcacta  
tcaaggatcgtcataatctcatcagtgccaggaaatagaggataaacaatgattgtttccaatcatcctgtgtgtaaacgaaaatgtagaatcc  
ggcacttatttgaccctttatctttcatttgggtatagaagtaaaagaaagtcggttcgtgtcaagaaatgagacttatgaatttctagtaagcg  
caaggcccttcaaatatataatgttacgtagtaagctaccagtgacccatggagaaccttatatgtcctgtacaaccacaaatcccatctac  
catttcccaacatctattcatcatattttcgaataatattacgggtaaatcttctgttatagaaaaaaaatattgtcatttctttgctttctagt  
cgcgttactcagtttagactcactttcgtatcgcattgttttctcactagttccttgcggttcttttaccattataattgataattgcaagtttat

aaaaaaaaaagttgcctattactgCGGGTcttttattgattcctattaccaaaaaagaaaagaaaaaccctaaagtaacattatTTTTgtc  
atTTTcaattggaattctTTgaaaaagcatttctgaagaggttattTgtctttctatgcagaattgactgttttctgcaagtttttctgttctt  
acatcaacccttttggctaaaaaccctcaccgatagatTTTTgtcatatcaagtacagaaaagtcattatcctTTTTtttcttctagctag  
ctctctttgctgtctgctgagtgcttactatttaccaaaagaaatccacataatatttttcttctcatttttcttctgatttcaattgcaagct  
atTTTTcttTgacttctgttacaatttacgattttacaaaatgggtagaactttagttgctcgatttttctcctacacgataaacttcatTTtagac  
gaacttgaggataaaggctacgaaaatcaccggcttgcagctgtagatTTccagaaatagaagaaactcaattcgcatagacaatgctct  
ctctcatcttgctatttccagaaaagaaagctcacaagccactcctcccctTgactcctgcttttctcccctcagcatgagaatactccgattactt  
taacttgagctccttaaacgtggaggcgttacaagacaccaaaaacgcaaaaacgccgaatataggtagcttccactttacctagttctg  
gtcgttcttctcctgtttataccaaccctgctcacgtgccggctcccctccacattTgctaagcgtgatgaccgattTgtgctcctggctgggca  
ccaaacaaaagcttctcaaaaacgtcgtgattctcctaagaaagacgttgcTttattTgattctgctcgttggacagtagagcgtggaattatcgg  
caacagtggttatttcatgctgtagatgctccgtccgcgacaagaagctggtaacaatgTgtggtaggtctcctgggtatgccactgagac  
tcttccaagaagacaaaagatgctatttctgcagccttattagTcaaacatcaatctTggctgtatacacatccgactctgattTgaaggccact  
ataatcattattgTcgaagatTTTatggccttctTgattaccgacataatgaaatTTTctTTTTccatgaagagagcaattgggatgctacg  
TgagggtcaatcaagcattTgctgacaaaagttgTgaaagtTatcatccggagataaccgtTgggtgaatgattatcatcttcttctgtacTgaa  
atggTgcgaaaaaaatgcctaattgTccattggctTTTcattcacgttctTTTcttctcagaagcttccgctgctTgcaacgagaaacgag  
ctTTTcagTggtagctggggccaattTgattggctTcaaaactgaagaatacaagcgtcattTctcagTctgctcgcgctcatatagctgaa  
gcgactTTTgatcgcatccttctTgaagatcgttatatcgatgtttattctcatcccgttagTgcggaccctgaggcgttcaagcttactTggataat  
gaagaacgattgacacgataaaccttcaaaaaaagatatgagaatctgaacataattgtaggtTgcgataaaatggacccattagaggaa  
tccgtgaaaagctTTTggctTTTgagcagttctTTTatgataaccctcatatcaaaaaaataccatctTgttcaaacggcgaccatgaccgagga  
TgcccgtaaagtatggagTggaagttcagaaattgtaactaggattaactcaacgtTggcgattTTTccatagatcacctcctgTgactTTTctTc  
aagtattTaaacttacctcagTaccTggctTattgtccattgcagatgcctTcattgtTcttTtgcgtgaaggaatgagTcttacctgtcatgaa  
ttattTtTccaaaaagagaaaaagTcactTTTgattgTtagcgaattattTgggtgcgctgattctTccgcaaggtgctTTTatagTaaacc  
atggagctTTTtagaatgagccaagctatgcgagaggccttagagTtagatgattcgagcaaaatcaaacgctatgagTtatgctTaaatgTaat  
taatagTcacacggctTctacatgggctccgaattTgagaacaaattgagaaagTcgTggctgctcaacaaaaacatgatctTtctcatatacc  
cagattactTgaaactTgtcggtagTcgatatgccaatgcaagaagcgtTttattTctgaactTgacggacaagctTtctgggaaggac  
gccatgagTtTgtgattTccattatggatataTgattaatattgacacgaatggTgaatgatccaaaaaattTgtttacatagcagTtTgctca  
gatcgagatgaattagaaactTctTtTgaaatattcctggaatgggtTtTgattgccgaaaacggatgttatTgTgaagccacatacggcaagcag  
gataacctgcaaacTtTgattcgtctTtTaaaaggagcagatggctTggcgtgaatccatgacgcatattattgaaatTtacagTgagagaact  
cccggctgctTtTaatcgatcatggatTgcaatggaattcaattatgTcaaaagTgaaaacagggatagTggTtTgagaaacgccgtTgaaTta  
TgtagTgTgaaatgaaaccggacatgcatgTaaaggcattcctatggaagTcacgtTtTggTggaaccgaaggatattTcaagTccacagc  
TgcggattatacctTaaaaaaatcTcacagcccagTgattTggactTggTtTgTgtagctgTgTaaacaccgTaccgatgaaagTcactTtatt  
TgggcaaacgactgctTtTtTcattacagTctccatgagagTtGaaaataccgaggctcgtTcatatactgagTggattcccagctTtctcaa  
TgtTtTaaactgTtatgTgattgagTcaactattatgatactTatctgattTctgattTtTaaagTtGctatgTtTgctTtTccatgTctTta  
aaaattgTcttatgTtTaaagTtTatatacgataattTatgattgTgctTaaaatagctTtTtactatgTgTactattTcatattcctTtattTcctTtTg  
attaagcgtgagTaaacaactTtTtTgattcgtagacataaagTaaacaaacgTaaactgTtTcagaagagattattatgTattgTattTaaaga  
gtattaatgTgacataccctTcctcctgacactTgggaattTctgcatatgaaTgtagTatgctgctgactaccatacaacctTgaaaca  
agcaaatTtTgaaTcgtgaaGaaaagcTgtagcaagcgtTtTtTcgtaaaaaaacaaagatagaagcattattTaaagagaagTtTcacgg  
gaaacggTaaacaaacgatTccaacgggtTgatccatatgTcaaaaatggTggtTacaaccattgctattTgctggtgaaagattctctattagc  
aggTgatacaGaaaatgTaatggctacaacattaataccgTtTtTatgcctcgtTtTcatgaaagTtggagatgattTtagTtTggtcatctgga  
ttTgaaGcagatgctTtTgctTtTgTcaaacgaattcaacagagaattgagctTtTatcatgataacacgagaggaaaatgaaGctcaatcgtgc  
gcacgaatggTtctgactTtTattatTggcaagcggTtTtTcccTactatgTtTtacccTtTgTggccggaatggataaGaaaatcGcgggagaaa  
tctattcctTtTgatcctgTtTgatctTatgaaGagaatggTgcctgctgaggtTctgGcggaattTcatcagcGctTtTtTggaaccaagTaa  
aattTacataatcaatatacccaggaacaaatggcGctgaaactcagcctcacagactattaaccttagatcaggcaatgaaactagTgcacga  
TgctTtTaccagTgctggcGagcGacatattgaggtcggTgactctgTgctagTtaaggTtattacaaaagatggTgTggagactagaactTtTcct  
ctTaaaagagactaaaatagTattTtTtTcatttagcctcagTtTctcTgcagcGaggattatgacTcctggtcatgTtTtTcactTtTgTtactTac  
tattTactTcatagagattTctcctTatgagcaattTgctacatgTctatgTatgaaTtTcattctatcattTctTtTcctTcatctTatcatgtagagT  
acaatgTtTcaaacTaatcccaatgTcaatcctagagggtagTgaaTtggcGtcaatcacagaattcaaaaaatcatgcccTaccattccagT  
acaatggattatctTgacgattTggaataaaatacgcaagTatgaaTcaacgattTcaacgaaggcaaacTtTactacatgTccagccgatgTatc

atcttaattgtagtacgaagctctgattacctaataatgatatgtctacgaactacaatgaaatttcgctttgcaactcaatgtaacttggtaaa  
agcgtctctttattatcgctcatataaactgtcgcaagttcattaaggttagacgtcattttttgattcccatttactctgttctctgtaaaaaagtttc  
cactatgctgtttcgtttggcagcattaccctgttctacagttctttactggcttacttgggagtgcaatggtatggaaccagcatttgaattgac  
agcggcctttcagcattaattggcgtgcatgaggttggatgctagctgctgctatgactgtgttcccttcaactgtaacaaaacatactata  
gaagcctttggtagcaatgaaaacaaccagccccgcttagcctttatggggattctcttctcgtgttgcattaatgcacactgtagcttacttgc  
agcataatgtctttagtactttagtccatgatcccttccgtgctatcttgcactttatcttcacggcatttgtttacataaaaaaggagcacgtactca  
gcaataatgttaccttcacttttgccttctgcatctcatgtggcagtttggctctatgcctcattgaaatgaagacaaagccaagtttgccaagcag  
atgagaaaaggagctgaagctgaaaaaacaagcaaatgactgaatagatgtaagctgtcattatctagacatgccgctatagtttaaggctc  
ttgtttcacggatgctttacaaaagttcagttaattcacaattcaaaaatgacattcattgggcacaaaagtccccccccagtgggcatagttta  
aattaattttgacgaatgataagaattattattatttagaatttagtgcaaaaaaatgagtaggcaacggtttagatatataggatcagt  
aaaaatctattcaagggattaatttctcaaaaattttaggtaatcattgccaaaatgttttcagcataatctttagcccttggtgacgggtcccttc  
aaagcaacgagccagcacgtaagaaatttggaaatccatagatcctttaaaagacaccgaattttatgtgcctgccgtaaaaacttcaactga  
ccttcaatgaagataatttgcacacgtcttaataaactttgaataagacggttgcacaccttctctacaggagcttgccattaataaaca  
acattcatctgcaattgaactttatcatccatagagagttcggaatcttctcatgaaacatgcatcttcaagaaagaattcacattcgccataca  
aaaatcataaaatgacattttgataagaagagtcagataaaaagtcacccaatccggattccttgcactttaggagatatttctcgtaat  
acttctcgctttaataatcaaaacttcatccagcttagaagtgctataaattctgggcactttattgaaaactggacatagctttcaagtaagta  
ctcttcccgccagcttgccttctttagccaccagtaatgcataaacttcttgaattattgagacgactgcttgaacaaaacttaataa  
agcttcagcagatggtgccttaaatcccattgtgttgcctcaagtttgcgaatgatctttaaactctcatccttgtaaagggttaaggactcc  
acctgacgatgtatcatccaaagcttctcagaactgatgatacttgttgaagacgaatgtttaccaagaaaaataagggaagagggttg  
aaccaaggttctgcatcaagtctggtgcaaaccttgcgctgctgcaacaaagttggcacaacagtttgcgtaaacctgcccctcatagaact  
gactcaaaaatcccgcacacttcatcagcattgtttaaaggtgtcacacgcaagagataacctaacgctgatggaagaactattgacagct  
ccattttgttaatatagatgcctttaatgcttgaacttaggagcataaggtataataaggtcctggcgtctaattaccagcaacatgcaaa  
tctgtgactacctaacttgggtggaacccggtagtagcagatcattcgaagtaatacgggagctaaactttcatcgattcttctgttataata  
gaaatgcacttctcaatattcgacatcatcgaagagccttgtagcgtgacacgagccgaatctaaatcctcagcgttccagttataagtgag  
gagtggaattccataaaagatgctgcttgcattatgttgaatattccagcattttcaataatggacggaacaaacggacttaacgcc  
gggtttgtaaatccaccaacgcagtaattggtgaatatgaaaacgattgaatttcttgccttctcatgacaacacttcaataggaatggaacag  
ctattgacattattgttcgacatctactcaagcccgtatcagtagtatttacggaagttttcaacggttgaatgacagctcttgccaaaagtta  
cataatggaaaagaggatatttcaacgctctctttatgtcatcaaagctctatagccattctcaaatccttcgagttgatcaaggtattccaa  
aacaggcacgttgcttaataggtcgacaagtgaaacacactgattcacgaaacctccaagaataatcaccatacaatccaaacaagaagaa  
acaagatgctgacgttgccttaagtcaagattagaaggtaccagagaattccaaatccgctattgttttagcaacagatatattaggatcat  
gacgatacaataaagcttctgagcaattgagatccagtgcatgagttgaatgtaaagagcttctgctttcatcatcactgatattcatatagcc  
taaacctgttgcaatccttacggcctgccaacggaattggtatttgcgatactgagaaaagagtaaaccaaatccggatttccacttccaga  
agccaaagaacaaatatcttataagtggttacagaaccttgattagtagtaaaacaagcagatcagcatccaatggggcttggatttggatc  
tactctatcagcggtaattgtagtactgatgaggttagtctgtaacccttcttttctcccatccaaaagatcataaacagctttcaagcctttggagg  
ctgtgcttgaatgaagtcatcctgatcaactaaaaagtaagaagtagatgatatgtcgttgaacgctcgtgggtatacgcctggcatgtac  
aaaactgtaacatgtaataataaccacaaagacgaagccttacgaagtagtggcttgaagattttgaccattcgtcaagaattttggagagaact  
tttgatataatggagaaaatgtatttctgtttcgaatctcgaaaggttaatttggcttctgtaatgtgcagcacagaccctgcaatgttagt  
cattgattctgcaacttgcgaataatatacaggcgaatcatcatgatagctcagataacagttatgatcgtgtcaatcaagtcaggatcaaa  
aggctcgtgcagagaaagcgggatgtgggataaagtagtcattgctagaatacgcacaaactgtatcctttcaggttttgcgatagcaactatagt  
ttcaataacagagtttaactgaacattttgtctagctagatcttccatagaaatattcagaaatataccttgataaacagacaatgcagatcttta  
tcagtagacactccagactgaaggtattcgtagaggatgctgaagaattcttcaaaaatagagccgttctgagctttaaatttactgccatttc  
tataactgaaaatgaaacggtatatccaatgataaagagagctgttatattttgaaagactatcatttcgactattgatgtctttattattcgta  
aaagagttttaggtaatggaaaataaccttgaatccttgcacttaggagcagtcctaaactcgtgacattgtgtctttaaattggaaggggc  
gactaacgtttgcttataaggtcttcttctgaaaactctgctaggatatccggtgaagcaagagatgagaattggtcaaatgtgaaagcggcttc  
cttgcctatgtaatgtacgcttcaaagagaaagcggaaataaggtttaggtatgagagacgatattagtttagagaattttgtcttaagg  
aagatctgatcttaacaaagagttgaatacatcattatcatcatatacggcgaatcttggttacttggtaagacatacatctttgataaagcta  
agaattgatgagcaaacctcaactaaacgttttcagagagcttctggattatacggcaactaaatgaaaatagcatcatctggatcagg  
atagaaggcgaatgaggtcggggaatcttatttttagcaaaagtcaagatagacattattatgtagaagccacctagacaaaaaaggccttt



ttgcttctcagataataaagaaggaaagatattagaatcctgagtttccagacatagaaaccgcatggtagaactggaatggaaatgcaact  
aaaagatagcgaagggaagaggatgcagcaggtgagtttggtgtactaatgataattttcaatgataggcaacaactcataaggcgaatgat  
agttatataaaaaaggaaggataattgataatgattcatcaatagctacacgtacatccggcgactcaactgtaaagctgataatagggtggag  
agcaatgaagtagaaatcaatcggaaattgatttggccagcaatccaacagaagatataaaaaatcctcgaagaagttcattctgaatggctga  
atttgagagtatttataaaatcttccaaaataccagcagctcctcggtttaagaaatctggatctgcattagcagatatccatctgtgtgaattga  
atcaatctggattgcaagtaggtggagcttaaggataagttataacaattcaagaatttggatccgtacagacggattgctatgtaaaagg  
tactgcaaagcttattctcaaggaaataggaacagaagctttaaagcgtagaggatccacataaaagctcatctaaacaatgtctaacagtgc  
tttaacgtggttctgatttctgacatccggggctcgtctgcattcgtactaggtcatcagctaactgagcaacttcttctgtgtatcagaagaag  
cgaagaaataggcaagccagttccatgttttggccattcagattttcgaaccagtttaataaccctctcggtagtactgttcttggattgttg  
taactcagtaaagcggtttgagaagattgaattaagaaaaaggaagagagataaaagcaaaactcctcaggacatgaaattgaaggtgttg  
atgaatcatttgaagaggcgaattgtaagctcattagaacaattggatgcttattacatgacttaagcaatttgaataattgagatcagga  
gggggagaagaaggaagctagtttctatagtaataaaggccagcaaaaagcgtttctgtagcggttgatctgcatgaatatactgctttaca  
agagcaagcataggttaactgtaaattgtctcactcgtactcgtcatgacatgattgcaatcgttatagcttatttctaactggctcgtgagg  
tgaatcgagcttaaaaaggattggagccaaatacacggaaataatgactggaaagattccgagttttggccaatgcaaaactgaaactcaactc  
catttaaaagtcttaattctcgtcagccatcgttgtttagtaaaagcaggtttggtttcttaaagctaatagcaggtgattttagactaactc  
gaaaattgcaaaaggagaatcagaagattaaaaaataaacaataaataatcaacgatataaaacaataatggatgataaaacaaa  
cgtgcatttgataaaaacttgctcaagagagaagtggttagatccatggggactctgataccaagttgtctgtattcacagcaggaggtgaaac  
gataactttaggaattttaggaaatgatatttgttagtttagccgatgaaggaataaaacttctcgtcagaatctgatgagttggttctctca  
agctgcattgagctggactctggagatatctaattgtaaaatgcattcgaatagagggggaaggtgagaccaattttgacattcagtttaaaa  
aagtaggaatagctggtttagtagcgttctcggcgccctcggtagaatgattgcaatttgcgacagcaagaatagaggtacctgtatattc  
cttcttagacgctgatgatctcgtctactctatgtttgaaagttcacaagcggtaaaggaatagaacaacccatctacaacttccagagg  
aggtttgggcacagttacaaagacaccagtagcattcggaaatagcatgtgcgcataagcataactcttccatctaaacaagacctgtatggt  
aaatgccaagtccaactgcaagcaattctgcttagaggggaattctgcattaatcgtacacattgatgtagactccattgagatgacctactt  
ggcaaaagacaggaagaactagagtcgcaagcctggcttttaacctaaataaacaatacaaatagtagatgatgattgaaatccctct  
taaaaaagcttctttacctcgtatggaatttgaataacaactgatattccttgaccggaactttgtttatattttggagtgaaacaagca  
aaaacaagtaattcaactacaacaacaaaaagaagtgaggattgttctagaattcttctactatcgaagctattgtacattagctcaacaca  
tataattaacaagacaagctgtaaggaaagagttaaaagccagaacagcgtagcttagtcattaaatcaattacttgcctaagccagaagc  
agttttggtggcttgcataactacgagcaattgtgctacggattttccatcttcaaggctaacaatccactaatagtagcagccagcaggagta  
gaaacatcattacggatcttgcaggatgtgtccttgaacaccatttgcagtagccaacatgggttgagcggcaagttcctgagcttgtgcaa  
aaggtatccccatcatgacaccgcatcagctcatggcttcaatcatagtagcaacaatgcaggtccactaccacacaaggtgtagaagcatca  
ataagcttctcggaagcttcatagtagctcaataaccgtgaacaccattcagcaaatccatctgcttccgtagcattcagagcaggacaa  
agcacactcactttcacgaatacactagcggatttggcatgatacgaataacacagagtgcttcatccaacaagactcaagggcagcaat  
agtcttccggtaagatagataagattaactttcctttaaaggcttcttcatgcctgtagacttaaaacttctcagcaccctgggcttgcaact  
gagcaataaaacgtcgtcgttcttctgaacgttctctcagcacgtacggaaatttctacatcttccaaataaactttgaaattctcgcac  
ttcttgagcaaaacttgacacacgctaaaactgtcaggaacagttacgttctggaagcttctcattcttcttctgattgagcaagatactg  
tcaaaaggctttaccatagtagccatccgagcacacaaaagcctgtcatgatgatagcttataataatcttccagtagttgttccaatt  
agcctaggattgtaagactgactgccaatctgattttgattgtatgatataatcatgaattaacatgcttcattgactctccttatgtcttacc  
aacatgagtgatcatgttaaataggggtgctactgttataaatctaatagaataattactataccaattttctgcttggagattgattgtttgt  
ttttgtaaaagttgattttgttatataaaaatgatttttagcattattatgaatcattgagccgattcgtatgaagaagtcacgaaagttggt  
tgttgacgctaaatagacactctctacgacacacaacgtcaaaattgcaaaaagcttgaatctccggttttatcttttttcttctttgca  
atattaattcaagaatgtcgaacttcaatattgtatcgagtcaacaacatgctgtacgattataaaggtgatgttgcaactattctgacc  
aaaaaattgctagatatcctcgagaagataaaatcgtagaactctacgcttagcctgcagaaattgtgactattcagaggtaagtcattgatta  
ctcctggatcaactttcagacattcaaagagttatactcatttggacaagaattggttctatagggttgggatgattgagagactcataatta  
aaatacagttgctaacttattcaaggttcagctacaagtaaagctatcgacatgagttgataacatcaaatgtgatgtattgattgctatggaa  
agtaagaaggatataactacaatatgaaagcgaaggtttacatttctccaagatgctgcaactgattatacccttccagcaactgagaaag  
aatgtcctcgtgtccatcatgaagccgtttttaccagatgcattcacgcctggtgactcaagaatggtattttatttttcttcttttctt  
aaaatgctaactaatagactttggtatagctttgtcgggtgtggtttgctgtagggatcaataactttataacataagaaagaaaagtag  
gttctttgagaatacggacgattttagcagccgcaataagttggtatcatttgtatcttataagttccttcatattacgatgctggtcctaatt

tgatagtaccagccacctaatcggaatatcggttcaccagccacttggtgacataccccttcgctgcttataatgaccattcctccttacctttcca  
tattgaaagcattctttttgtgcatacaaaaaaaaaaggagtgaggccgtctttttgtcattttttgttggtacttacaacgccgcatatftaat  
agaaagaaagaaaactttatatattatataagacttctcatacggacgtgctatacctaaagcctttggctccttttataaacatgattacagg  
tgctacccaacaaaaccaacatgccaatcgctacttgccgatattcacagagctcttaggataccatctcctataccagctacggactatgagg  
ggtcagactacgcttcgagtttagctttagtgaaggggaaatacgttgagagaactgaattagaacgaagcaacctttctctgctcctc  
ctgtgaagaaactgatgatgctgaagaaaacgatagctttgcttacgatcaaggctgctaaagctcaagctttaaagatctagatcttcaaac  
cttgagtggggatgaaaagtcacccatacttcaataaaaaacccagcttgataaggtcaaaccgtggaaaatgcatacaataatcattcga  
gagccaactctaaatccagtttcttgaatcactcatcaatgactcaaaagtcggtttctttaccatgcagaagcccttttctaacagaagc  
tgcgagaactgacaattccaagaagaaccagcccgatcaatgagtaatacctgacaatacttccaagaattaacaggagaggattcta  
atgctgctccgataatgcctatcatctcctatgagttataatggaaatcccaattcatcacgcacatacccctctgattcaagcttcttaaca  
gtatcgttagtagcgtcagcgatagtaggatctgcaaatccagtgaacagcattgcctcattcggattttctgatgattcttattttcaggaa  
gtccacactcctcatgatctgatgaagaacaacgcccgaagaacaagaactggtattatcggtaaatctattgatgaggaagaaaatcc  
tatacttccatgaagtctcaatgcctctgaagaaccaacatagatgaagacagccatctcacctacttccaaagttatggctttaccagat  
cctagatttcaaatgttttgcggttttgatgactgactagaaagtattactacgagagaactcaaaagttgtttacgcatacaagcaatgaag  
gcttttcggccccatcaagacgtgtggttaactcctgtttcatgcctgctagagatgagcaatctatagccgctactctatttctcctcaaatatgc  
aaggcagaggccgactatacatacgtttggaggaaatccgaaacttaactattcctctgcttgggtgtaactcgaatttacatatcagattaa  
aggagttaaaggtattgctcctggcaacctttgacttaccacaagtatagaaaaggaatataatggatgaatctgaggattcttctattgttt  
gggcttaaggcaacgtatgaacctccaagaccggttctgcttggcttaggaaaggtttttcaaccagtcggcgcaaatcttctgctatgga  
tctgtatcagaggctctgcatggttatgtttgcaagatggaacctttggtgaaatctcgttagatattgattcaattagtcggagcgtcttggctg  
atgccagtcctgatggttccaatcattaacaaatggatagtggtacctacagcgcgtgatgcaaagccttcgctgcgtaaggtaggtgacatgat  
ggtccatgcttcttactactttcccgtttctcctaaggagctccccttcaattgaagcagctatggaagacttgaactgtgcaatggg  
atcgacattactatgtgatggttattatgtcaacagggtggagattgtcctattggcgtcgtcgtattccaattaattggctcgaagctttag  
ccttcaaccatttacaagacacgctgcaactattgaattatctgaagctactcattgtcgtatgataactacagcgtatgaggaagaat  
tggaaagttatctatactttgaggctggatttcaaattttcaaaaattcagactatattgacttctatgctgaaactgttgacgaaaaagaaga  
gtggatgtctacgcttcgacttgggtcagtcgctcgggtccgaaatggacgaaagcatttcttcttgacagtgtagacaatgcac  
tgaggtaagggtgagtgaaagaatgaggatttaattgcaatttttgaaactgtttatgaagcatttattgcataattggaattaccattactgttac  
tgttgttattctattaaggtttttattgcaattggtattactttgagcctgatatttaattgttacgtttgacttgtctataatgctgattcagaagtg  
ttattttgtacaattattgctatactatccatattttatcacttataatggttggccttcgggcccataaaatctataatgggaattttgttgaact  
tgaacagcatgtacataacgttagttatttttttataaattagattgactattatcgaaaaagaccgggttgttttagtgcataaaaataata  
aataagataaattgcatacgtcgtctttattgcaataacctggttccatacagtaataattttatactatactgtattacaattatcgttactcga  
caattcgtaccttaggagatctattttggactttccctttgacaaaatcctagccaaagcctactactttagattttagggcgggtatttgaagc  
atgttaacctcaggaagttaaattttaacataattgtaattctaaagcatcgtgaaaatggaattaactcaagaaaaggagtaagtagggtgg  
acttgactcaaccgtgagtaggctaaaagaattggtagatttaacttttagccttttaattttctccttaaggatgagctatttgaacagcaaac  
agttcgggtggatgagaaggtagttgacagatataccgaaaatcaagaattgaaaagtagcaggattattggggacaagctattcgtttac  
acaactaccttagaaaagcccccaattctgctagtgaaattacagcctcctggaaaaagctcaggaaaagcgaagaacgacctcgaact  
taaagaatgggttcaaaagcaattgcaacttgaagactcggattatgccgttacgatttttcagattttctgataggtgacgatgaaaattct  
tgcatgtttccttccaaaagttccaatgcgaacaaacgcacgttctgggaacgaggttatctcaatcatgctcagaaaaggtacgagaaaagat  
ttggaaagtccttccaatgggaaggcttttaaatcaaatgaataatcattcagggtcaattcccgttcagcagcttatcttctgaaatga  
acgtgttttgaattcgttctcagacgactctcacaattagtgacggagaataggatataatccttcaaaattcaccgaaaatgatgaaga  
agtaggtgaatttagatctttgaaaagtcgaggagcaggtggaagatggtatttcaaaaagggtaccaactgtggtgaaacagccagagctc  
gccttcggaagctgtttgagaatgaaaattctacaagtcaacaaaatcctttggcagatagtttgcgtgggttttcaggacatgctgaacaaaac  
cctttaaactaaaaataactgccccttagcgaatgcttctcagcaatgatggtgaattgcgaatactatattagttccgaagcaatag  
gttatattctttccggtatataagtcaaaacatgatccgggtattgaagacgaagcacagaatccaaattattggaatttgcgtattgtggaaga  
cgatggagagttggatgatgattttcccgtcttgatcgaactggtcccttagcaaaattaccttctgatcgtttgctttggtaaaagctacaatg  
cacaataaaaagaaaatcaagctgctttcccttcttacaagaaaaagaagataaacttctgtgtccgatgacgatctttcatacgcaccata  
caagttacttcaataatcaacaaaagttggtgaaagtataaagatataatcaactcaatgcatattgtcaagatccgattgtatccttatgg  
agaaagttctcgttttgaacgttgaagatcaaaaaatacacgcttctgatggttttaaccaagtttgcgtgagatgaagcagttggaacgtctc  
aaataactttacgaattgcggactcagatgttactctcccttagataaaaaccttcaatctatcagatggcttccaactctcaggttagtga

gaaaatgagagataagaaaggaccagccttccagtgagtactccttctcgggaagattctacctataattctacaaaaaggattattcccgc  
cggcatataatgccgcagacattatgtctagtaacacttatcaaggtttatagttggaaacgtcaacctgtctcgtttatgggaagacatgaac  
gattactcgtattgacggcgaatatatacacataatgccttcggaatctaggaatattttgaaacgccgaagactactagcattcatgtcggatc  
aatagttatttgcaacaatccaaaaagtcacctgtaacttcaactaataatctcgaaaacagagagacgaaaaggtagacatctaaagtttc  
tgctctataaatacacaacttagatgatgatttgaggtttatcatcactggaagctgcagttattgtagtagaatccggacactgatgagtg  
ttagcacaactattaaatgccagtgttttaaataaatacatgaatattttggggaataaggaggaacaatcaaacatctcaaatctg  
catcgtctcatcatcttcaacatttctggtgatcattaataatgacatttctgactttatcatcatcgtttatgtagctttcagagtttctg  
tgttagggaattagcattagcaatggatcttccgtttttgtagcattatcagagtcgttataattggatcttctgtttcttttatgtgac  
taactggagtagtagatggcagacttagaacatctcgaatcttctcgtctcatcttcatcatccacgatattaatgtaggttctgtgtatg  
tctgagctctgtttcttagcacgtaaacctcgcataagatccagcgcagactttcagtaactaaatcttcttcttcttctcgtccactg  
tatccgaagaaatattattgtagcgttctcgtcctactcgggtaattccgccagaaatggtagacattgcatgccattcaggaacagtgttgt  
aaagccgcagcttgttctaaagttaaacgcgagcatcctcggcagactctgcatctgcagaaaagtcgacagtaattgagggtgaagaat  
ggcatgacgaatacagtgcttgcgcaaggttggtaagtaatatttgcattcattgatagggaaacagctcttctaaagcagactgg  
aaattgttctgaggcagacaatctcatcaacctgcttagagcctcaataatcctgctgacctgacccattaaacggcctaactgttttgactag  
acatcatttccgactttctcatcatctttaaattctgtcgcacaatcgtacataagaaggtaccctcgggagtcactaacgacgacagctctaaa  
ctcgaatacttctcggcaaacggacagacataacctttgaaatcaaaatctaaatttagttagtacttttcaaacatagaatattgtgaga  
ctgtatgaagaggacagacttattcccttatgacagatcctcgtccttgttaacacaaagtagcaggaatgataaataaacggaataatg  
aaggaaagtaatacaaatatgactacactacgcatcctgtctcactgtcttaaccaactggtagcattcgcattttatgctatcaatcgtga  
agcaataatcgatataaaagtagtagtctggattgtcttctgtccttctgacctcgtccctactctgactattctcagttagaagacctaacc  
aagttcttaccattgtaataaacgatcttctcaatttctcgaagaaagcagacttcttgataggaattccattaaatagcactttgctc  
atcagtcaggctgtcacagtagtaagaattgtctgaaaacgtaagatgaacatacgtgagtgctcaaaatgcatccataaaaatgatat  
gccgggtctcatagaagctcgcagatcattttattagcttctgacgacttccggtagcattcgcattattgatgtataaaagtgaagaattgg  
gtatgatatgcaacttgcacaaatcgaatttctgtggcagtaggcttactaaactatagggcagtgagtgcatatggaatataatgtttaca  
gaatataaggctgaattataatattaataaagtattaataaaaaattacaagcaaaaggaaatcgacaatctgttcattaaagtaatttag  
cagagaagtagcaaaccaaggatgcaaatctgtttgattctcaatataatctgtaattcgtatcaaaaacgatttttagagggaccatc  
agcttcaagatataatcataacagtaattagcattggacagatagatcatcagaccgtttattcatgaacagtaagcgaattttctgat  
tagcatcactataacagaccatcaaagtcatttcatcaagccagtgagaagaattggactcagttggtacaactgaattctcagtgagcacg  
tttccactgtcaatcaattcaacatagcttttcaatgtgtccggcagtagagattcattgtggatgaggatgttccactgtatcttgggagc  
gggtgtcgaagattttatacttctgttagtattaggactaccttcaacgaaaatacatgtaaggtttcttggcgtagcacacgccaataacaatt  
catctggtgaaaaggacaattgggaaatggatacatgttgataccccgctgaaactcggatacttttctcgtttctgtttcactactaata  
agggttcaaaaggaagtaggaggcgttttagaacctgaattagatattcctaagcaagatagttcgtatcgtgcgaggagataatgctggt  
attataaggtctttatacaaaaacaaaattggacttgcgacttttctgaagaaataccgccgtagttttcttagtagagaccatagcac  
ataagcctaagtgaaattagcaaaataatctgccttcgaaactgaagaacaaactttgggttctgggtgtctatagccgaagtaattcatag  
catgggtaaactgatacagaagagtttgaagcagtagcgtacacaaaactggggtcgttagtatgtcttcttcttagacaaaataatgct  
accaatacgtactgttccatcaaaagataatccttgatttgaagtgtaactcaagctcgcgaacaggttttcttccatcatcccaacaa  
tgagctaaacaaaaagggaaggtaagcttataatgtacaaagcaagaaaaaatcaaacataccttatttgggtggtactttggattattccc  
tctccgaccagcagtagaatgttcttataaagcatctgcatatggaaaaatccttcatctttaaagcgtatattgtcattaatgaattatga  
atcctgtggtacaaactcaaggctacttctctgagctctcaattcaaggattcaattgaaagattttgatccattgtccagcgaacag  
ataaacatgttgcattgattcaataatatactattaactttcagcattccaattttacattgattttgtagaccatagtatattattacaactca  
actgacatgtttctagttgcagagaataatcctgtcaagggcagatattgtattataataacaagagaggcttataatattattaagaaaa  
acaatgttacgtttttaaagggtatatacctaactcagaaagtagcaatctcagattggaagattcgcaggtttggcttaataaatctaaat  
gtcgtttattgactaatctagtcagtgactctgaaaatacttatagaacataactaagtagagcccaattttacaaattttacttctacaagcctt  
aagccaatacattcagttataatataatagcgtaaaaatcctaactgtgacaaatccaacctctacctaataagattatataatgcctaataata  
taataagcaacgtcatatgtttgtagttagttgtgtactgcttttgggtgaaatattgtaaggatattcagatcttataagaagttatcataaa  
cattagcattataaaataaaaaaaaaaaaaaataaaatcagaatcatgcaaatctaggcaaacggggcagcttctatttacgagcgc  
atattgagcaaggtatgcatacggcaataattgagggaataaagcactgacagaatctgtgattagctgctcaaaatacatgatggcatcag  
attcagacatttgaagcaaaaacgctccttctcactttgtaaacgacctgtcctgtcaactttatctggtatattggcatccaccatcaacgag  
aaaaggtaaggataagattggaagatttctgaagggcagtaaatgtagtgtaacaataatgactaaattgttgataaaaaggagaattgtacc

tccatgccttcgaccatttctttgaaagcttcatagccggtgaaaaagcttgggatctcttctctaaaatgtagccaaaatccgcatggaaaa  
atgacatcttccgtaattagtagattatccaaatgacgatcccgacaccaagtagataggaatcacacagatccagcacaactgcgaatat  
aattatccattgcttctggatgaatgccataagtattagaatttagatcattatctggattatgctctcgtaaatgctaaaactgccccggatt  
cagcaagtatagtagccaaggtttatagtaggaacaaactgtacagcccatgagttggctctgtagccaaaattctgtaaggcttaagatggaga  
tccaacttttcttctcaataattatccatgagtgctcagttttgaataacaagttggtcttgcgcaaatcatctccattcttaataatcggt  
atgacatcatcttggcacttaagactaagcgaaggggctgcatggtgattaaagaccgtacaagcctcaggaacaattccaactacattg  
acagaggatccagaggagtggaagagccgtaaaattcataaaatgatgtttggaatccatcaagactgacttcaggtattctattttttatc  
ctgttccccggatgctgaacagattgctcaacctaaagtaattttcgataaattggcttgagtagcaaggtttcacgtattgctctcctca  
gttgattggaaagttctgttggaaaaaggaacatcactgaagaaaatagcttattcgagggtcatctgaattcaaccactaaagaccagata  
agtctgttccgatattgggagacgaaactgcgcgactgactaaaaagcttgccaaaggacttgggttgggattttcccagcaccggttgaatat  
catacgtaaagcctgtacgagttggagaagatataggagagttcctcattggatgagtttccaatctagaacagcatatgacgcactgtt  
gaattttgacgaagggctaagcagttctaaggcatcatctatcgattgagtcagctatccaaaagactaagagcttgggttactctgtac  
tgtcagaccataacgctcttcaaaaattttgcatcgcctttttatcctagttaaatagatcggaaattccatattaaatcttttctccagga  
aagatcatcgctggaggataggacataatattctcaattcttacgaatcttggagtttggctttaaagctctgtccaatggaccattgcgctgag  
aacgaacaagtctcgatgtttgagttcggcgggactgcaaaattgattccaaatcgaaagatgagccaaagacaggagatataatattcgag  
taatttagattttgatataaaataggaaaagaaaactgcaagaattcgacatataggtgaggagtggaacaagaggaatgcaagaagaacga  
aacgactttttctcaatgacagttcgtccagccatgctaccgaaggaatatcacctagttgaagcttaaataagcaattggtcgaagcgtcg  
agttcacgaactttctggcttcaacagaagttagtgagttgcttttctaattcgtcgtttaaagttatagataggtattttctgtagccttgcctaa  
aagtttcttctcaataaggcgtattttgatttcaacgaactcacttggcttcatatgcaagagggtttccatagaaaataaaaaag  
tgcaattcgaggaaactccgccagcctaattcaaaagttgaccagttgttttggcaaacctagacagctcaattggaagcacacttttgttg  
gagctttgaaacaaaaaatctgtactaaggaaagtggtcgtatcgaaaatagctgaaaggtaacaaaatgtgtatctaaggcatcttgc  
attctaaaaagcatacctttatataaaactggcgttcaacttacttgaaggcaatacgagaaaactgattatccattccatagtattacatata  
tctaaagctagttttattacatataaaactggatataactacaaggatattggaagctggttgaattgaggtggacgttagaaaaggttcttag  
agaatggaatgaaacgagctttaggttagagtaaaggtgggtttatagcttcatggtatataagcactaatataatccgtggagaaaga  
tggaaataaataaataaataaagtaaaaaaataagagaacgatatacaacagacagcaccactagggtcttcaataatgaaattttaa  
tgtcgtactacagtcaaagaacatgaaaacaagcatctaattaactgacgtgttttccactcataatcgctcttcttgggtataaaaacc  
aattgcttgaagatgcttgaatacttaggaaatcaaatgtaaaaaagttgctaaagtacagcaaaactccaataaaatctattctattc  
caatggtacagcttatttccaactattgtataaggggaaaagtgcaattgctttttctttttttatcattttttatcctattttgagaccat  
gatcaaacattggaatcctagcttctgttagagattgatttttttatatctataggtatgatttttaggataatgattttgctttaggaattgcct  
acggctcatcctagtataatattacaagcactttcacgtttattgttactgttcatgaaaagacttgatacaacgcaaaaaacaagagaag  
cagaataaagaagaaaaataattacagcgttatgaaagcttatttccctcgaaatataatagttgccaggtattgttcaataaaaaaaca  
cttccattgcaggttcatggttccaaaagaaaaactcattcagttacttgaatcaacatcaaatcatgaaaattcttaaaaaaacaatttaa  
actacatttcttctgactacctcaaatccgtttggctcctaacgctgttcaacttgcaagggcatttcttactgaaacaaaacatggaacctat  
tctggaaaaactattcagtgaaacgttacaactagtggttgaaggaatccagcatttactaataggtatgtttgtccacctcatcagaagg  
aatcattgctaaacgaagtaggaaagtctctggattttcagaccttgggaaaatgtggcatttactccatataagagaaaagtaaaaattgtc  
cgttcatgctctccaatagcaattgctgtgagatcttatgagttttgctctgattcagcaaaaggggtatgcatagtgcaaaaaagg  
accttacttactttgaaaagaaaaaatcatataattcacattggcaatcgtcattattacagatcggctattaaaattttgtgcatcagtc  
attgctttgcatggactgactcattatgggtgatttatgtaaatcaagttttatgaaagtcgcaaaaggctttgcaaggagtttctggaattct  
tacgagttgtcaacgctcaattggcgaatttctcaggaattctctaaaatgcaagataagcgttaagttggatcattaaagactacatgttataa  
cagaagcagaagaaaaataatgtctcattatcaaaccttttcaacaaccgtgtctgatgaatttgatccattttcaacttactttgattttac  
ctcaggtatatttgattcctatagcttttactgactccatagcctgataatgaaaccgaaacgtcctctatgaatgatgagttgaaagattttatac  
agcaatatgctgaaatctttgctccttattcccacaagttcctttatgtacctttcgtctaatccatcttctgggacaattttaaaagctattaa  
catctatcttttaaatgatgaatcactttaaccggggaaaaatcatcatattataactgcaataacagtcgaaaaatgacaaaacttcaattccgct  
tgttgggatacaatgcagaaaatacaaaatgtcaatcttaagtttcaacaataatcgttgacgtggctacaaaaaggcttcatcaagttttgaa  
acagatgaattggtcaattactatgaaagttttccataaccaagagacaatcagcgaatctggccgatgaattagagattcctgcaaatca  
catcagcaatttttaagggaattgttaacaaatacagttgttttaagggttatgaaggtgccacacaacaacttcaaaaatcgagatttactta  
tccgaaacggccaagatgaaattttataatgacatatctgaaaaataaacattggagagcagaatcatgagtcgaataatgctttgtcaatt  
tttttctaacttcaaaagagaacatagattaaagccagctaaaccaaatcttctaatagcagattagaagaatcgtcaggtatttttctaa

tgcaagagtctgtaatctttcattttttctcaaattctaataataccattgccgcaaccgacttcaccttctccccactatcagcagagttaaacaa  
aaattgtgtatagcctcaaatcccaataacgactttccatggtgtgaagccaataaactaccgggtgtgattctaaaaccacaaaaagttaa  
caaaagagcctcatttacctccggggttcaaccttgagacgacaaaactccgtaagacaataatattcatctaccatccggcttaactctca  
attttgagggtacagcttgcgaaaaatagattccatagtttttagatagtagactactaaaataatggatcggtaaaagaggaaacgcttgactgcc  
atcatgaatccattggtcaacaatagaaataaggacttatcgactaccttagatagcttattagctttaggagagcgtttacgcgattcaattccg  
ttgtctagaaatgatccttctgctgcaacgggttaggacctcaatcttctggtactctccataattggcatcgttagcttctctcaaaatcaaa  
actcaatctcaagtgtgatggagaaaaactgatcatgaagtcttgaggtaacttttctgtaggaaattcaaactttctcatcattagccaag  
gaaactgcagccatggctatacttgataatcatagcttctgctgtagagaaaagtctcaataacaaaatggagcatatttcagggccgca  
gatttctggacacgcagaagaagattgcatagggacgaaagttagtctatcgaagtgggttaaatacaaacgatttgaagtctactaaga  
ttccaatagccatttggcatgatctttactccgatccaaacagagactttcttgaatcaattctgggtcggtctcaatcgcgacctttgtgctc  
ataatctcaacgtctaatagcagccgacataaactctggatatactgggtgatccaccttggtttggaaatagtaggatcatctaccgaatctt  
cactctccgagtcagaaatctacacggctgaagatcatcgataattactttctgctcattatgatcgtactgtcctcaaaagtttatcaaggtta  
ctgattctgagatttggagcattgcatcttgaatagcttctttcattttggctgacagaacctgaggacataacgaatccaaaggctggaac  
tgatcgttcaactcagtcaggctttcaaataggtagccttggaaactagccattagaggacatacaatcttagtatttctgatacaagaa  
aatattgagcgataatctcagtaagaccatgccctgtagcgtatgccttcatctaaacttcaagcctgttggatccccgttctaaacaaaa  
tgacttagagcactcatgcaggaattctcgatctagttttagagtaataaaatcaatagacagtcattcttctgggacactaccgaataatt  
ttcagaaaatgagaagccgaccaagttgagaacaatgcgttaacagtctgcttaagctttatctacatctttataagaacagagcagctt  
aaaactatagaacgcatcaaaaagagattcagaggtatctcccagttaaactcgagccactgtaaaaaatcacatggcagaaaaatgaagtcga  
agcaactggccaatgctcctggaatagactccgaatctcgatatttggaaaagtaaatgagagatttctggtcaaggtccaaaaataagat  
gttaaaaaagattttgatccaaagggttagcgaacggaataagtttgaacgaaggtgaatacgtctgtaaagaggaaataaggcagaaa  
ctgaggcttttctgctcctggacgtaataaatagtgatagatgggaaaagtcggtgatgattgaatcttttaggttcaataagcttgcctatc  
ttttacttaagattcaacatatttagccatgtagagcgttgaagttctggttgaatcgaaatattgtacgcagaaagaatgctgcagaaga  
attgatgattccgaaattgccaagaaaaatgtaaagcctgaccatgttgagcgttttctgattcagttatgctggagcacatgatagtttcca  
gatttcttaagttcaatttgttaaatgaagcttcaaaacatccaggtatagcattccgatggaagctgattttatgatgccataaacaagctc  
atctaactgcagcaaaaagtaactttaaaccaggaaggttgaacaaactgacaagttgatcttgaattgacgaggttcttccaatctcca  
aaagctagccaagatgttgacggcaattgtgtgaataaagcagttttctgctcaggtaaacctatgaacctgatggaagaaagatttct  
ctttaagcgttgagttcctatagatttgaataatcgttcttgaagagtcattgaaaaaaccaatgttctagcagtaagtactagctttgagtg  
atcaaatgttcttgaagaaacctgataatacaaatcttattctgtataatcttactgaaccacagatgttgtaattaagtaatttagct  
ttctctgatggttatggaattgtacctgaataccaatccattcgatacctgaacagatataatgaattgattaattacattctttctttaaactcaa  
acattactgtcttctttaaataatctcgagacaatcttctattgaagcttctgcaagtcagttgactcgttctcactggttctaataagtaggt  
ccttaaaaagtaaatagaaatagaaagcaagtaaatatcagaaaagacaacgtatgtgactagctgttagaggattaaatggacggggacagg  
acagaaggtgaagccaagcttaatccgatcaattgctacacaagaaatagataacttctactcattctttctgaggtataaagaattggcaa  
ttcattaggaatcaacggcattctgcttctgtagctaaactcagtttactttggatccttagtataactctttccggcactactattgaaagc  
caattctataaatattagaggtctaaactacaatcaaaaggttacggatgattcaactatgattacctgactagatatacaagccactttctct  
caatcaaaagatatattttattgagacatttaataacgatttaattctacaattgataaaatgaaaacattaaatgatacaatcatcttctcatt  
gcgtccgtgctttctatttgggtgagagcgtttattgaaactggactataccaccatccatcaacgggtgcaagggagagtaaaattctgaataa  
tgtcgtctaataagcctgttctcccgatgaaactgctcataaaaatgattaaatgaattagatgctaaaatgaagtaagaagcaatttgt  
atgttgggtgtatccgctaggtccgtcactcttggaaaatctcgtgtaaatcaatcttttacggttctataaagaatgatactttacaatc  
cataaaaaagtgatacggagtggtgatttgtcttattcgaatctcacgagcgttaactaacctattgtatttttagtctgaacacaaggaaaag  
cttggaaacattcggtggtggtccttgaagagaagaatgcagagctcgtactgaattggataaaatcgcaacgccagtcattcattcgt  
acttcaagcaagccttattaacaaggtgaaagctcaagatgaggccttaagaagaaggttctgttttcaagtgctaaataggcttttttga  
ttttatgcaaaaaagaactgattctttgacgggttctttgctaaactatgtcagattaacgatcttaatgccttgagaaaaactgttccat  
ataagtcggaggctgatctgatcgtcacgttctcaacttcaagccggtgactctggaacttgaagattgtgacgaaaagaagtagtga  
gggaaattactcagtgcaaccgtaccagaagaagcttactgaaactgaacacgctcaatctgccgctgataccatgaagagtgaaacttaatgag  
cttcgcaatcaactaatgatcccgaatcaagaaactcagtgaaaatttggtaaatcgtctcaattggatgaagttcgtcaaaagcaagac  
agttactataaggatcagcgaagatctcagtgaaactgtagccaaaaagctgttttgacgaattatacaatcaacgtagaggacttcaaag  
agaatgataccaattgctcgtttctgacttatgagcgtgaacaacgcgtaagcgaagaacaaatccgttagagcgtgaggctcgtg  
ataaggagaagaagcaagccttagcccaacgaaagttggaagaggctagcattctgcttaccaggaaattctgctgtgaaaatttgc

aagatgtttcatgtttctatcggttcctccaagcctctgaaattgatagcgtaaagcaatctcccgaacaatatgcgccccgcagctttgcc  
ctcgtcatgtcgacctattccagaaggactgtttgaagaaggacaactctgatgatgatcaatcttctccggcctaagaagccaagccca  
agaaatccaataaaaaaatcacaacaaccaagcagactctgatagactcaactttcattgggtactattaaggagttcgacttctgttggtg  
aagctccttgactaagactcaggttgagcctgcatagagcagcttaaggaaagctattgggaattaaaggaaagcaagattctgactaag  
gaactgttggagaaggctaagaaggagcttgaaaaaattgaaattagcttcaactcgaaaagccgagactgaagctactctgtaattgacaag  
aagctgcttagttgactgattcatagagatatctaagaatacctctatattactatcattttgattacctataaattctagaaaaggaataaa  
taattttggcacaatgcattagctacatttctcatatgaataaagcattcttcttctctataataatccgtaactacttttctccatcttaata  
ttttctcaatataaactcaagcagttttctcagtagatacattttggctccttcatatttaggtccttcgatctgcaacttaaaagctctggataaaa  
cagttagttatcagtttacttaataatacaaaaacaaacttttctcagcattcgatcatgacgttgacatgcaagcgttctccacaatggaata  
taaactgttttaataatgctattttctcttttagatcaactggaagaagggtattacctaaaggaagagttcaaaatgcttctgaaaact  
gtcctctgggaataatacaactgtgacagcttcatggctaaagaatacaacaagtcgatagatcagtagataaaacacagctttgttgataca  
atgacttgcaagtcttgatccgtcgcttctgacacggaaaacacagacatcagatctttggcaacttcttgataaactccgaaatcttgctta  
caaagatcttagactccatgcacaacttcaactcggttcgattacattctataatattttgaataaactgttagagacgtataaccgagat  
attgttctttaaatttcaacaaaaaataagctcttttcaaaaagcttctcattcttgaatgacttatagattttatcgagatctcatcattgt  
ctttaaataaacaagaagatccagctcatggtatctgttctcctcaagctcgattttctgagataataatcgttttcaattttgaagatt  
ttgtttctcaaaataggctctcaatttctcttttacctgcttccgaaacttctgttctggaatgtcttctccaacgacacttctgagctg  
cacattttctaactgctacgaaaaagccggtattctgatgatgagggtacactctcatgcatcttcaattcccattttgctgagcttctct  
cgggtaatggccaaagtattggccattttcattgaggtcttaggaagcattcaaatgaaggatgtgttcaaatcgtatcacagacagct  
ccaactttcacaccagggtcttttaattcctgtacttcttctactactatctagtcgaactttactgtattcaagcagcagcaacc  
acagcttcaatttcaatcgggtctatagaacaagtagaatacacaagcagaccaccattagcagtaaatcgatgccagttttagaatctttatt  
gcgtagaatgtagaccgagagcagctttagtccagttagtcctatagagaaatgttttgcgaaatgtaccatgccagagcatggaacatca  
gcaaaatcgatcaaatcagatgacttcttttccattgggaccatccagttcgacatggaatgaggtagaagaagcatcatgattg  
acgattaagatattcggaatcaactcttattgtatgaacaagcagtgtagcagcttctgtatctgaatcgtttgctatcaccataccagaag  
gaagtagatcgaatgtttcttccatccgaggatgaagtgctctagaagttgagcagttttggagccaggggagcagacacatgctg  
agactttatgatggcttctgacatgaagaaaagaggaggaatcatactcacagcttctgtctgctgatcaccggctcgtttctaaacta  
ggaattgctgaagaagctttaggggagggcttttgaatgatagcttggaaatccagcatgaaagccattgttctggataccaaggttaata  
gaacaggaggtgaaacttgtaccatcgacctcgacgcttcaattagaggatagtaatgcttattgaagtgtcccggactgagctccatgcc  
taaggtagctgcgttaataacttcttattattataaagacatagagacatgttttaacatactggttacaagaggtaatcgaaatgctgttg  
cagcgttccagcagttttgcatatattcaatttcatcttgaacagcgttctgaagcttgaatactttcaaatccttcaatttctacaagat  
tatactgctcagctcaattgttatagctcacaacaatttacctctgtggtagttgatcccaatctataaactcgtctttttctgatttcttttagca  
ttttgtcataaactaatcaataaataatgaattaccttttctaccagaatattgctcagctccattttccaattttctgatgaatcagctct  
acaaaaggcagccaaatagaactgtgcaagaatacttagacacagttaaaaagaaaacagaaatcgttcaaaatcccttctgattgttgtt  
tataatataatttctataactcaactactgacattgttatttcttctcaattataactgtctttgtcctctacctaggcagcttcttaggaaagc  
tcttcttctgctcgttagcctaaataagtaactaagttggttcaaaaataattcatgttttattattctattgtatattcattagccttcttttcaa  
ttgatgatttattaagcattgattttgagcaaaaggacaaaccgctgaatcgtcttcatataagggtattatttttttttttttttttttt  
gaggagagactttgcttctggtgaattggcttcaaaactgtattttgcttatagccagtttaattgcaactattgcaatatgatgtttagctcca  
aaaatcacatagagcaggatgcttctacgtttgctaaaaacatgatctcgaaaattatcctcaatcattccttctgctcaagcttttggaa  
ttacctttatttactttatctgtttgtgaacctaaaaatcaaaaagctactatacaggtacctttcatttgggtttggcatattttgtttatta  
gtttgtaactcaatatctgggtgtctattcttattcgtatcaaccgtttaaatacaaaatgtgttcaattcagcagatttctatgaactactaactatt  
ggtcctccaattttgggtgtcttgaatcctttgtatcgcttttacctataagttatataatcaccgatccgaattatctaatccttttagggcctt  
acttcttgaaaaactaccttttaattcgttagtgcatttattcagcctatcttctagttatctgtaagccagatttctgttagcacaacatt  
agctagcatttatatgtaaccttctgtttgtatgctgcttttacctagaatcttgcaaaagcaagagaagcgggtcttaaatattctctt  
ttctttgtattatgctgctcagccaatttgggttcttccattgcaatcttctgacatctatgactcctttgcaactctgcttctgtattctatattt  
gcatgaactataatgatctggatagatgaattacaacttagacttcaagacgttctgtctctgttagcatttgggttctgttgcgctgaccatttg  
tatcaaatgggctttgaaaggaatcataaataatgatcagcttatttttctacttctatcggtcagagttcacaacactttaaagcttccag  
acaacagctcgctgtttatgtatataaacctttgtggttaacggaataactgctgataaggaatccagaagatctttttcttttcttctgaaatct  
ttttacatgggtgtaacaagttttatggctttcacgaattcttaggggtgatttctgatgccatacatatggcatttgactgattgccgtttctg  
tgggcttagtcgaactgttttggcaaaactcctcgaattatgcataccttttgggtttgcaaaagttgaggtctctctggttttcaaatggga

ttttctgatcttgatatcgttctcattgtatgtgaggcgtttatcggtgttccatccccctaaaatgaatactgatcaactttacttgaagttcc  
ttggtttgatcgtgaatctagtaggtatagtcgccttcaatcacggacatgccataatcatggggcgtgctcacatttcagtaaagatttagcactt  
cccaacaactaatgatgtaatatatacagggaattcaataatcatcatcgcgacttgcgaacacactctattatcgatgactatcaggacgaa  
cgcaagcacgagcatttccaatacttcatgatgacttagttcacttcgattcacaanaagagcaaaaatattgtctatgccgatcatcattcac  
atagccaccatcatcatcatcatcattctgaaaacgacaatagcaaggaattttctcatatattagcagacacatgggttctgtggccgt  
gattgtttctacattccttatcaaatggttttctggacaggtttcgacccttggcctctatagtaactgccgtttgatatttttctcagtcatacctt  
tataaaaaattcagcgaaaaacctattaacagtaacggatgcagagtcagaatagccctgaaacaatgtcttccagatcatcagttatgagat  
ctattattagcctgtctaatccaaagtttggaaatgaaaaaggagagctgcatgggaccttacatctcaagttagtagaagggtgattga  
atgttacgagggagagatataagaaaactaaaatcggccttgcnaaacctaaagagatatagtatacaagttgaacgccctaacacttgttgg  
tgcggtaaataaatatataataataataacacataaaccttctataactatagacctaaagaagttaccatgtcattgtaaggtttt  
agagatagacttctgaggaacaggcctaaatcagctttttacattcaatgacactagcctcaaaaacatccattttagcgtcgcagaagtcag  
ctggctacttctgaaagccacacaaaacgattatggccatgtccatcatcttctgctcattgctagtaaaggcggagtagcagctacata  
atataatagctgtttttcttctgatcattacggctaagacaagaggcagatgctttagtttcccaattcttttcttctataattttagttagtc  
tctacaagaatagtgatggacctgaaaatctaccctgatagcctcagcgaccaaaggcttaatttctgcaaaagcaagtgaggatgctgaaa  
atccttatacaggacctcagtaatcaatccaatacgaagagcgtagagctttatggatctcttttcaaaaagcaatccagtgcaact  
atagaacgctgcatgttcagtaatttcaaagcttctctaatgcatccacattatcaaggccatcataagcgtgtaaaagtttttagccatcc  
ttgttttcttcttcaaattttccagatactgttcatcggctcatatcgggctcctttgttaccatttttgcctgcaaaaatgtaccggtcctcaac  
ttcaagcaagcactaatgctgaagcaacatcacttgcacttagtgatcatttgaagccatgtacgagtaaaactgtgaaatattacatcgtc  
gagtcataaagaggggcaaatcttgaagactgcttttagagttttcttagattcatatccatataagtttgccttacttactaagct  
taatcccattttagccaggagctttagcaggcgttccgtcttctcgtcctcaaatgtgcaaccgggagcctacgtacgccgagtgtaacatagca  
ttgtataaactccaatgtctaataacataaactaaatctctcaagccgtatggattgatcataaggagtttaccgtgaggtgcacctatatt  
cgttctatccaatggcaaggattcagtcggtcacctcgtcctcaaaaggtataagatctataaagtttcttgaagagcgacaatggact  
tcaaacatgtgagaccgataatagccagcaaaagcatgctattatcctctgaccaagcatggacgcaagcgaatacagtatattgtaattga  
ttctccataccaggatccagtatcatagattcagctagcacataatgatactccttttttctatgatattttctatgtactcgcgtcgtcgt  
ttctgtcagtagcttctctgctacgttttaggaagttcagaagggtcaataatccatcctcattattttctcaccatcgccgtcggatgcttca  
gatttctgaagaagcgttttctcgtctgataaaggtaaagattcagcgcnaaacatgcatcgtgtatttggccatcatcctcaatatcaccgt  
catcaaatatgtagattctattatccctgtataaattcaaatgttaaggtcagtggaatcaatcacatatacagatatacctcatcagatttt  
aggtaaaaacttaaatcaaccatatttcccaattgagcagaatcagaactcaagcttctgtttttctaatatagtttgattcagattttccag  
atcacgatcctgaaacagggtcaatattatgagaataaagtcggccttcaacaatcgagacagtaattacaagcgcataatgcatcaggat  
ctaaagcaacgaaaatgtgtactacatccaccagaaacttgcctcttaatttagagtaagcaaggccatattcggacctccggacgaac  
atagataccctggcagtagtggtggcaacaataaagatgaattcgtatgaaatttagaaaactaacacaagcaatcttctcaataaatcttcc  
aatagtcaatatgttcttttgttaattaacaatatgtttttgacatgattgcattatttttcttgggtggcttctaggtacttgaactatggag  
actggcatatgaaatgacggtcatcagaatcagtttgcagtgtaaaagtttaagtttttaataaaacgtatattgctgataaagccttagca  
cttttctagcaatagatgtatcgtggctcacttgcgttctgctcactgattttccaagacaagtagtagagattaactgattgaactataaagg  
aatttctactgatagtaaaacaggctactagcttcaaggtcaactacgcaatagacttagctaaagtgagcagcgtccttaggtttctga  
aggaaacttttagtagactacattttctttttatcaaccatttctataatctgtttcaattcttttctttagcagataactgcaattttacctttt  
gtttctgtttacattattttagaataataggatatcactgatactttcgttatacgtattatgataaactcttagtataataacatgaatca  
ataacctatgagtaactcctatggggcagaagttttccatcaataaactcaattgactggctattgtttcttcaatgtaacttttaacatcca  
ggtattttaaattggggattataatgaaagggaaaaacgaatggcaagaagaccgcaaaagacggaaatccataaaggaggaaactg  
agtcaagctgcaacagtccttttgcagctagtttgaagatgcttatcctgcaattatagaaaagcttctgtaaatatggatggatggcttgggt  
ccaaagagctcatggagcaattgaaagttcaacctttagctacggtaatgtcttggaaaccggaaaagcttcaaaaatataaagttaccacaa  
agaaatgaaatcaataacaaaatggaaccaatctattgtctagatgccaatcctctgctcgttagtgctcctcacgctgggttggagtcg  
ttatgggaagaataggggaagtttaagttttgatttactttcaatgtttcctcacctgaaagatggaaagcttgaatttaattgggatcttcat  
cttggattccataaagcgcggaagaagctataatggcttctgacttcttattatacttcttaataagatcaaatatttcttctcctttattg  
aatcaaggaaagatacacagataaacaacaaatctttttacgataatgctagacagctggccaagagtttacctaccgtagatgttctgagac  
aaacgtttattatcgacctgctcctttcagaggcgtccttagaatggatgattcacagagaaaaggatttctcgaagactcatgctcacttc  
ctcctttatggaatgaatatcagcttctcataatgaccgaaagttttgtcaatagaacataggttatataacattatcaaaggaaaatgtcttt  
caacttctcgtcggcactaaaagggtgttcttgcagatgaaatgggtatgggaaaaacattagaagttttgtcccttgttcttttcatcaac

tcctatcgacaagcttcttagtacacagttcgattcagtcctgcaaaagaacgtgatattttcaaaagcaacactcattataacgccgtcaacgatt  
cttgatcagtggttctgaagttgaattgcatgtgccttctttaaagatatctcattacaaggatatacgaagcttctggatcattttcttagac  
cagtttttagacgctgatatcgtcataacgtcttattctgatttgcgttctgagctattatatgctgaatccttctccagaaacctcgccatgagaaa  
agacatgttccccctaaagctcctcttattgacatttgcgtggaggatagcgtggacgaagcacaatggtagaaacctcgaaagtaacgtt  
gctcagatgattatagaatcccaagggtaactgttgggtagtaagcggtagaccggttcgaggtaatgttgatgaccttcttggctacttttct  
tttctgatattctctatctatcagcatcgaagcaaacatggatacaaatatggaattgaatcgggttcatgaatttggatattctctccatt  
ggtttagaaactgcaaaacagatattgctcacgaaactgcggctacctccacagcaccgagatatacgcaaaacagacttaccgttgtgaag  
aaactaattaccaagatcttctaccgaagcagcaaaatcactaaaatatctggatgatcaactccttgaccttccaattagacactatgaaac  
gttggcttattctttaaagacaagcttgcctcctcaagttggttctggaataaatcagcttccggtggtgctctatgaaaagtataatgat  
gtctaatgtttatgttgaacagacaaattcatcactttcttcaaaaaggcaatttttccgatgctgaaccacaggctgggtccttgaccat  
ctacaagattcggtaaggcattagctatatggaacgaaatcctccaactgtagaaacgggtgtttagatttagaggcgcaattagtcgcac  
agaaattgatcctgatgaaagcaaaagtcatctaaattgtcatacgcaggctgaaactccctggtaatacagagcttggcagggttacttca  
aagtttactttttattgcaagcacaacttctttaaanaacgaaggtggagaaaaagtattatagcttctcaagatttaagaagaaag  
atgatgagtgataataaaaaaaaaaagtaaacatattgatgaatttggcaagcagtttagccgaaaaacttctggttttaccaaagctacc  
aaaagcaagctctaaaggaactattttagttatttagttgaggtatgagcaattacgtgaacagctgaattacaagcagagctttagt  
gaagttcgggatcgtctgatttattgatgaagcttcttattagatcaagagtcagatccaacagggtgacgaatagaagagctttagatgcg  
caatcagagattcatattgtattgatgtatcggcaaatgatttctgatagagttgctgctatcgacggaacaattaacttttctatctcatga  
aactgagttgaaaaatacaagctttagaaaaatagaaaatgctcaagaaataggagaaaaagaaactgaagaacgcaaaaaagata  
tgctctttttgaaagaaaggaagaggtcgcccaagactaatgaataggcacttttgaanaacttggcaagactggcggtatgattagc  
agatcaaacacatcttctgagatactatcgcgcaacgattgttgaacaactaaatgaagttacgaaagatcaatctaaacatgccgaaaact  
cgagaaagagctaatgtgatacaactcacttataatgcgaattgattataagcattgacgaaatctagattctttagatcctcaaca  
gcccctaaagtaagtcaatcgcaagcttctatatacaaatggagcagaagatttatttagtcagctttagacatgctgaagaaaaataa  
caaaaaattggaagaggaagagcaagttcaaaatcaaacctgcatccgagagctttagatgagatgatttcgcaattgatctctgctcact  
tactctgttgaagaattgagtcagaaaaacaaacaaattgaggaanaactcgggcattttgaatccagacttctgatctatctaatattatg  
aacatgctgttttaaggctggttcaaacagcaatgcattattgtcgagacattataaaaaaggttcattacaacatcggtatgtattgatt  
tttagtgattgtaaattgtgattcaataactaatttttctataggacattttattgtaaagattgttagttgctggctgaaacaccaccatcg  
tgccccatgtgcaaatccaaattgacaaaaatagtgcttattacattggtgaaggttcgacatacgtctcgacaggagttcgtctgggattcc  
cgaataagaaaaggatttgaagttatggatgaagagactttaaacagattgatccatccattgaaggttcttttggatcaaaaattgatg  
ctatagtcagacattaaactgtaagttcaagttatcagaaagcacaactaactatctctagatttgaagcgaattgagctatccgaaagtagt  
agtattttctcagtggttgacgtactggaagattacataagtcatttgaggcaaacgggtttcatatttaagatttgaggcaaaaacaaat  
agttgcttgaanaactttaaaggtgatcgcgatagaaagattgacgcttcttaggtcacaatcgtaagtaagattactactaagactcaata  
ctaactaaattaactagagctggttaacgcttactaatgctactcatgtaattatgtgaagtttcgagctcaaggaaaaattatcagaaacttt  
aaagaaaacggtttgggaatataactaaacggagtaggtgaaccacttttaaatagcgaatcgaattgcaagctatcaagagtagataga  
ataggacagaccgacctacatgtatattactatagtcgaagatactgtggaagatcacataatgagtagtccatacaaaagcataaaca  
acttgggagattaggtctagacgttctttaaattggtagatatacaaaagagtagcattcttcttgggtgagaagctgtgatgaatcggaatc  
cgcaatgttgaanaactgctctaaagattagatttgaaggtgaagaaggctatgatttttgaatttgggtgacattaattttatttatt  
tatttctaagctatatacaatgtaggtatttgaatgtcacaagtgcttctgtagattctgtttttagagcagcgggtgcaattgatcactttttat  
aaagatactatcgacaatctgatgcttcttgccttctgctgagatagtgaaaaaggatcagacaagaagagaagtaagaaattcatatgct  
aaaattatgtttaaactgagatttcttcaaattccttttctcctgtacaggcattttgatcaatttcatttattattaataagaccagaagtaac  
attgctgggtgacaaatcgccaatgttactaatgtaggtaacaatacaataaaacctgttagtattatagtgagtaaatatttgttctctt  
tatagcaggatgaaaaccacaatgtagactatataaaaagcgagaaagaaaaatcttctggttttagaatagatttagtatttctctgtttg  
accacaatagtagcattcgcataattctgtttgcaaaacagtggtttcaactgagagatcaacgattgcaaacctctaaaaggtacgcg  
atcttactactaataatttaactaatgaagtagatgcaaggagattacgctactacacgaagtttcatcaacagggtgattcgtttgacc  
agcaaatctcctcgtgacgatgaaatggagattgttatgcatgtataatctccattacaataaaaaaacctaaaataaattcatgaatc  
atttatttattttagtactattacatttccaatggttgtttatgttaaatcaagtaacatcagaaaataatatacactttagtagataaataag  
aacagtaataattctgctgacaccgatactgaaaataatctaaacatatgtcagcccattagttatattctgcttggaaactttaggaa  
ggctgtttatttgggaataatgaaatgaatcaactttcgaccactgatatagtaccaactattgtttatagaattctagttgtctagctactccc  
gtacaactctgactattagatcggtaacgagagtagcgttaattattctaagatcgagtactactacttaggtgaaattcactgcatgaact



ggctaacagtttacgtttattacagtaaatagtaggttgcgaagggtgtaaagggtctatgggtttgaaaagtccttaaatgatcttatcaaggg  
aataagatcccatagagacgatgaagatagttatgtcaacagttgcttattggaatgccgaaaagaagtgcaagtcgaagatgcagaatcaaa  
gctgaagctgctttgaagcttgcatatgttcgtaactcatattaagtgccttactgacttatttagttgaaaatgittgaaaatgacgttagctggg  
caagtttcaaatcatcgaagttatggcttcttcacagctttcacaacagagaggatatttggctgcggtgcaatctttaagccaacaactga  
tgtccttatgtcacaaccaatataaaaaaggctgggattcttctccaactaaagcttatgccaactttactaacacatctctaggacata  
atgagctcaaaaagttccagaatattacatagcaatcaacggattatcacatatctctacctatgggctagcacgagattataccaagacgtattg  
attctattaatcattcggtacccatgtacgaaaacgtacaattatggttctctatagactttgcttcaatcctgatccattcctatttgtgttc  
caaagctccgagagcgattagatgatacggacatctcagtcgtaacgcttctgtcagtgtaatatgtgagctggctgcgagaacacaaaaaac  
tatttgagtttgcctcagcttctttcatttatacaaaatcttctaataactggatgcttcaagctttaaagttgtttgcgtctttaacccttat  
gaaccaaggcttgtaaaaagcttggccagcttcaactcaaattatcgagactacgcatgctatgtcttactgtatgagtcataaacaccattg  
tatctgaaatgctagcaggttattctcattccgatcagcttcttgggtgtgtgcaacaaaattcgtgagttttctagactctgatcagaatt  
tgaatatgttgcttactttcattcaataagcttgcgaatacgcatacaagagcttgtgctcagcagctagatataattctcagtggttgtagact  
ccgacacttgccttaggatgagagcattggaccttgtttgcaaatagtaatgacagaaatattgttctatcgtgaagacaataatgcttcagtt  
gggtgcttcatccgaagcgttctaacgaagactctgaaccataaccgcgataagcttgttgaatgacctcaaatgcaactatgacgttat  
ttctgatttgaatggcttcttagtgtttagtcgatctttcacgcataaccaggaattcagtcgggaaaattctgtcattcaaatgttgacattgc  
gttcgctgtaaaagctttagccattgtctattgatttttccaaataaactgacccttctatgattttatggaagggaagtataaggaaag  
ctcctgtgaagtttaccttcttcttgggtttaggcaaatgcggaatataatgaagaatattgacgtcctggatggactagttcgtccaac  
ctctatctcttccaaataacgttcaagcaatactcatccagcttatttctaaaaatttttgcaatgggtgttaacgaggaagcggcctggaata  
cagagaaattgggttagtgaattgtgggttactcgaattcaacaattttaggagagcctggcacattcacttgatggagtccaaattaggg  
ctgtgaatacagttattgttgcctcaaatcaagaagttctcaatactgatgatttccgaaattctcaggtttcagaaggacctccttacatt  
attaaaagcacggttttaattcttactgaaccgttcaaccagctcctcaaaagcagagaaaagggtattgcctcctgaaggttggatt  
agatactccataaacggctactattgaagtcccaaaaagttgatggatatgatagacgaaagcattcacgttgaagcgcaagtgcaagggat  
actattggattatcagcaaatagttcccgaatactcagcaaaaaagaatctattgccgttagagattgaaatagtccttttattgaaattcaag  
tccatttaggaggaggagaatactgcagaagatgacaccaacggaattaacgaagttaccgagaatgattctcttttcaggcagcaggata  
atgaaaggtattagatctgacttttcaaaaatagtaacgaattatagttactaaaaaagtgcagcggagaaaagtactcgttcacattcaa  
ggacctgtgaggtgctcaagatgagataccggaaggagttcattgtcagatgaagatcaattggagcagatcaagattcagcaagaaaagc  
ccttgattcattggaccaacttctcagctgtaataatgataatgattatggctgagagacaaactcgaaccctactatcgtccataaaaagttca  
gaaaaaggagaaagaagaaaaagaaaatgtaagctgaagttgtattgtacagaaaaactaacataaggaaagcagaatcttggaaacaaa  
ggacagaaaaaaaagttcgaacaaaacgtgaagagtaaattgaagactttagtgaagttacgtataatgtttatccataattgaaatgtttg  
atcgttcggtttaaataaacacctcactcatgtagctgaaatatagtcagtttgcagctcttatttcatgtagtaccttacgagaaccatt  
aatctaccggaaacctaaacaatttattatgaaacgagacggctttaaagtggtttaaagtattgagtcgtaattgcatcagcttgacgaaa  
aagaacataaaacatatgttttcttcgctgagggaaacttaattacattaactcttcttcttctctcttctccttttattttctgacatg  
tattttcttcatttcaagttcgtatctatcactcttcttctgcataatccagcgttcttggggcagatacctgtaaaggatcacctcctgtct  
gacagcatttgcagattatcgcgcctattttagtagaccaaaaggcattatcctcagcttggcaatttttgaagcaaatggagcagctt  
gccttatttgcagcggcaaggacttcaaaagatacaagtcgaactcctcaatcaattcacacatggtttttaaagctcactataacggagaagc  
cgaggatcacggtcaagaagaggtgtgaggtgaagaaagatttgacattactatagaagcttaggctataggaatgtccataagttgaaa  
gcaagtcggctttgaaagaacattgatgtgaggtagatctaattgaagcagccttcaagcaactaaaagagcacttatatatgcagcggga  
tcaacacagcaaaaacgagtcacaagctggaccaccacagcaggaatcaatagcttttgataaggtgaaatgatttttgaagggaatcat  
ggtcggtaaatagttcagcttgcaggacagtcagaataacgtaagcatctttatgagattcaatcttccataaccaatctacatggattc  
aatagctccattgcaaaaatgagagcaccgttaggtcctaagtcataagtttgaatggctcctgatgcaatcatttccgaatatcaatcgta  
cacgataacctcataaagctgttctggtatctaaattcacaatgatacattgtctgccaatagcagaaagaattgggtgcataccatagcaataa  
gttattaccagagccaggtggaccacgactacttgaccgaatggcagcgaattgaaggtcagcgacaaggctggttagaagatcaaagaa  
ttagtcgaacgcagaaaagtataaggacagacaaaatggcagctactgatggaaaagtaggatgcaactaaaatagaatgatgtaaagctca  
aaaagtagaattgtcaacgtagttttataataatccctcagaaagacgtttatcaacaggttagagaatagtcaaaagattcgttttctgtaaagc  
aaaaataaccttactatgaaattttatctttcaaaaaaagaagaaattatacaaacaggttggctagatttaaccgtatactactggcattg  
gtgtaggaagaaaaagttgcagaaagctctcactcactataaccataaccgatacagcagctggaattagctactctgaattttttgaacgag  
catctatagctgctgaattttcttttattatataaccaatgttttagattaccagccaaaggttttagaacgcaattcaacaagcttacagaag  
cctgctttagcgaatcttccataaagggtccggttaggaatagatctttgttttccaaacgtgtggttaaaggattgttcagctactccagtaaaga

tgaaaagcaatcgtatTTTgaaatgTTTgattTtgatgctTcaacgTtacagaagaatccctTtgaattagatactagagcgtTtacgagctagttact  
tgaagaaaataaaaattcccatccagatgTtGCCaaagagTtgatcctaactTtcaatcgaagTctgTgaactTacaagggctTataat  
actctattagcgcattgagcagggccgaataatTTTgcaacaaaagggatctctacagattcggagaatgTctctgataaggaccagaattc  
ttaatgcaataatggatgTtcacgaggaaatttcatccagcagggattcacctgaaaggattgaacagTtaatgagagagaacaacattcgtaa  
agacgaagaatctataaattagtactgcaatgtcaaggctgattgggaattagctgattgcatgTcagTcactaagatactggaacactg  
ttgacagaattcttcatgagctgactTTattaagagagaatttctTgtTgcatatgTttacgTttctatttaactatgactagttaccctatctc  
acataaacagctgtaatgctTtacgctTaaatcgctctgaaaaggcaaaaggcaatttacgcaaaaatctgTtTctatTTTcaaaatgacaa  
gctaaaaagctTTTgagTgtaatcaataaaataaaataaatatgaaaacaacattgatactctgTtaactaagagTtgacatagccttaca  
ttgagagTattttcagTcgaagTtatcatgatacgaagTtccgTgctTtgaagatcgtaaagTctTTTaaatcgTactcagaccaggaa  
ctagacaagggaaaaggcattatcttGtaaccgtatcccgtgagTtggTttacaactgTtGacgTtagaagaagTgtGcGataaatccattt  
acaggtgctTcaaagaaagaaaccggggagTtggctgctagTttcattgactggagagatacttgattgaaggcatgactTTTctcgtgTgc  
ctTtgaagcatatgTttgatccaaactTtGtccgagTtggggcaagagaaagTtaatgaccctcgtgTatcacatggttatgctTctcaacgc  
agagctctagTaaaagattggaacaccttataagagcactTaaaagactTctTctcGagcgtTgcatatgaagcgtaaatggTgccg  
aagatgagccgctacgaaatcgtTtccacataaggaaacaagtagTcagTgagctTcgcgaatatgTcctTtagTtGactccatttctcaa  
tccagactatcaatacaagactcatgaggacatttGtagTcaccactTTTctGtaatacGactgatatggtTtGcagTttTgtTgTcGaaa  
atcctTgagTcacctgcatgagTacaagggaaaggagacgcatgagTatgTtcattgctatgTgcaatcgaagctgTtGatgTttacaacc  
gTtGtaacaacctcccatgTcacagacgTatgTttagTtctTgtgataactTcatgccgTaacagatgTtGaacgTatagaatgaagaaga  
gcatcctTcatagTgcaagTaaaggcttaattctGtatgaaaacgTggtgagattTcaatgagaactTcGaaagaagattTtGcatcc  
TggatgTgcaaaacatagGacgTaaaggTtagTgaaaaagctcattaggaaattgTccacagatcatcccatatttGaacactgact  
TggtTcacatcctcattcgaatgTgtacgaagatgTtGtctaaaagTgaaggcctTgagTactTttatcacactcctGtatggacaagcataatt  
tattcactTtctTctgTttaaactGatgTctatccatgTctgagTcaaatataaattacaagTaaaaatccaaatgaaaccaaatac  
tatgTtaaaacccaaaatcatgTtatgTgattaaaataaaaggaagagaaagTcaaaaagaaaattagccaatattTgattTtga  
cgagTggattcaattcaaaagcagTtcaataaacgcaattTtTcaggaccagTataaacaatgaatgatagTtttTtaaaaaaaaaga  
atgggtcctcggccagcgtTtaactaaagacaattTgtaacgaacaatgagctTggaagaatgaaagattgaaatcgtTgtTtTcatcatt  
gaaatgataatcgtTtaaaagaaaatgatacaagaattatcgtTtattTgacattatggatggaaaggTtaataatagatcataaacatgga  
gTttaaaggTtctataatgagcagatcatagagaaagTtctatgtagTcttagTcGctggaaatTgaaaatgaaaagcGtatccgGaaagaaa  
gaaagaagcatatcatgagTgtaagaggattgggaaataagTtgaagggaagTgaatattcGtaagTgaaacaatccatagTgTaaacaaga  
agTctTaaatagTtGacgaagcctcaaaaagaatTaaagaagatgcaatacagGaaagaaaggaaattgcaattcataataagacatgga  
aaaatgaattTtaatactaaagcggattccacgTctcaagTctgTcagTtccataacagataataaacaagTatacagTaaagtataagcaatc  
ctTtaacgTtactatgTaatgTgTcaaaagTaaagattTactaaaccagTaaagaatattTccTaaaaaaagTtagTaaacagaaagagaagT  
aaacaataaaggTgacagggagTggaaccagagaaagagagaaaggacggatagaataggatagactTaccaagagaaagacgagaagTc  
cattattgTtGcactTtcaagattacaggaacacgctccgaaataaggaaaagatggaggGaaaatgTaaagcatcgtacaataaatataggcat  
agaaaaaacaattTgcaaaagcGactacagTgacataaggtgTtTccagcctcGgggagatccattTgTaaagaatcagaaacaagT  
ataagatatcagagaaaccaacggaaaaagagTttTggaatcgtTtccatgattcTgcacgagTatacattcgtGgtcGatcaactaataat  
atactccagcatgattcgtataagaaaattgagTatacccaataaggatgcaattcctTctTtTgTtTgagaaaaatgTctgTacggggag  
ccgataacacctatTtTggaacgTgtacaaccaaaaaaatgatggagTcagTcactgTgtagcaagataaaaagTatgaaagcTtaga  
aagagattcctgagTataaatattgTaatgacataaagcTaaagcTaaagaaaaagTccaatggacGccatattcTgtgacatgTtctgata  
ctcGattcctTctGcaaaaagatccGaaagattcctagcaaaaacaaaataaaagcTtccaggagTactTttaaagTctccgggtTgtTgata  
tcaTTTtccgaccagcaacgTtccagaggagaaacataaaagaacctacccaaatccatgagagagattcccaagTtccacctTtGcatg  
ctTtctggaaagaaaggaaagTctactGcaaggatgcaagTgacagTcgaagcatcatctgTgagcGataaaaatgTtactgaaagcGatacga  
tgatcatagTcagcggTgTcagTgTtTgctGtctTtTgtTtacgattctctTtaaagTaaTccaattgattggactggagTaaTgaagaaacac  
agaaggGacaaaagcTatagTtaaagcaaggatgaaTgTtGacgatatatgTatagcaaacagaggaacaagcccaaaaataaaga  
attcagaaagaaatctGtaatccctTtTcaggaaatattTccgTactTcatcgaagaccacagcacagcaagcaagTccgatgcatatca  
tgacagTcgtcTcaaggacactacaaccgTctattTgatacaaaactctTtTctaaTTTcGagacattTtctatctaaagatccataaaa  
acaggtgaaaatctcctTtTtagagTatagcagcatctatagTtGcactgTgTgaaagTaaagcaaatcGgtagaggatgacacaacgTaaa  
caatcGcttagcagTgtagattgggtctataaagaagTtTcGatcatcaacagTaaaaaaacaaaaaaagTaaataaaacgaatagaaga  
ataatatcaggaagaatgTtctaaatgaagcaatctctaaaattactTttacGcaagaatcagatgTtactTgctgagTgcctaggtga  
catggtTgtTtacgTtGaaaaagattgGaaacaatgCagagcggattgctTtaagTtgaatggcactaccGtaactagctTtaaaatgTttaa

acatggtgataaaattcttttgaagcagcatgatgtatctcgtatgagaaaattctaatagcaaacttatccatggtttagaggaaacacatct  
tgggtctcaacatttgtatttggaaaaattctacgatatttaattacaaaggaaaaaaagtgaattgaaatctccttgatgaaatga  
aattataaacaagctgtagctatgaacgagactttactgaaccacttttgcctcccccaaaaaagacagaaatagtaaagctaaatagataa  
aaaatatttaaaaaaacagaaaaagaaaaaagtaaaaaaatcaaatcagcttactaaccacgactgtttgttactgctgtttcc  
accacacctcgttatgattatacctataagcttatgaacatctcagcaaccaatagggtagggtttataggaaacagtcaaaagggaaacat  
tgcacccgactagtttggaaaagggtgccttgacctctgccaacacagaaaactaacaagaatggctaccgagcttgcgttcaaagtgagc  
gtgcttatcaaagcaaccccatatctcctcaaaatgccaagaagggtgccgctcgccttgggtacaaggatgtcggtttgggttcaagaccctt  
ctgaggctatctatggtcaatacattgacaagaagtgccttgcgttggtaagttccattcgtggccgatcttgaccgggtactgtcgtttctacca  
agatgaccgctaccatcatcatccgtcgtgaatacttgactttatccccagataaccgttatgagaagcgtcaagaacgcttgcgtcccacg  
tctcctcgtttcgttctaacgagggtgatgtcgttactgttgcaatgccccccttgagtaagactgttcgcttcaacgttctcctgttgc  
acacaccgagggtctaaagcaattcggcaagttctaagtagacctagccatgctagttgtgtacaataaaaaacgtgctttttattgctatgg  
atatctctagagagaagagaaaaatcaaattcatttttctgttttttctgtatagtgaagaatcctgggtgggttctcctcaaaactgaac  
ctgaaaggtctttgctatgatttaaccctaaaatgaatcttactgtattttatatactgtaattatacacgcacctatttttgggtatgatg  
ccaattttcaaagaaacccgaatttatatacctaaataatcggagcctagtttgggtgtgtaaacgctggctatgctcactcaactgtatcgtc  
ttacaactctagctccatcttcatccacacacactttcgttctgctttttgtttcacctagtaaattaacgatttcttactgattttaaggagaa  
aatgctgctctcggtaaagtatatcaccgaatctcggactccaactctcggagtcctcaatatcggagtcataatgaaacaccgatccttttcca  
gtccatctaccaaaggagggttacaagaatacacgaaaaatgagcattaatttctgttattactattttatatttttatttttga  
aaaacagcttgcctgtttgttgcactcggatctggcccgtttgttctcactgagttggacgtattcagagcacaaggggttctggactt  
ctcaattaactcagcaaaaaggctaaaaaaaattgtttacggtttccttttcttttaaatctttcacctataaaggaccatacc  
attgtaagaaaaagtaaaaagtcaccttttcttctgtgattccctcggcctcgggtcatcatttttcttctcactgttttacttttatatt  
atacggattttctgtccatccgtctactgtattccatacattcgttgtaaaaatcagccgtgaagagatcccgttctgacgaaaaaaagctta  
ttcgtatcttccgtttacatctttatacctaaacatatctgacagttcaacaatggaagccaagtcaaacggaattgagcttctcctgtgga  
tggcaaagcgtatggcttccatattggctgtcagcaaaaattacccaaaacacccaaagggtattggtattggcagtggtgacacagtggttac  
gttgcgaacgtcttttaaaaagccgggagtcgaaaaatgtgtcttctccaactgggttcaatcaaagaattaattgtctctagtggctacg  
attaggagatccagattgctatcctgatgtcagcttctcagcggctgatgaagtagacgatagcttgacgtcatcaaagtggtgggtgct  
tgcttggccaagaaaaattgattggcttctggcaagccttgcattgtcgtgactctgtaaaaatcgcatactggtggaacattggaa  
gaagggagttcattgaagtcagccatggcttatacctccatcttactcaactggttgccttaggtgcttgaacctaagctgcgtatgggtg  
ctcctggtaaggctggctgtggtaccgacaatggtaactcattatcgtatgcttagctttggttaataaaaaaccccaagagcttttga  
atcaagcttctgggtggcgttgaagaagtggtatcttctgcaacatgatttctgcttacttggtagcgggatggttagcgtcactgtca  
agcagtggtgataatcattatccccctacagttacggctcagctactgaagtcgatccgctgtagccgagcaaaatgccgaaccactat  
aagtagctatcctaaaactgaactaaacgcaatgttgggtttgttattcattcatcattcacctcaatgtattatatacttatatttttctg  
tttcttttctgccaattgatgattgagcagtcattaactaataaattcttccataattagtttttattaagcaaaatacctacaattcataatc  
aattcaataatagtgataatcattttctatatgacaccagtcaagatatgttctgttttatcaaatcttctgctgcaagcgcctatcttt  
atctacatgtaagattgttttcttgcgaaagtcaacccaatccattatcatgcttgacatttatgattacgaattaattgaaaatgctatcat  
taaatcaaaaatttatagtaactaatgtacacgaattcaaaaatcaagtcataaaaaataaggagagaaagacgtacggtgagccaaag  
tagcttgtgctgcaaaaagaaagcatcaaaatcatagaatataaaaaagagaaacataatctatgttcaaaaacataattgaaaagtca  
acctcagaaaaatcaaagtaactgtaaagacaaggataatggaacacggcctaccagaattaacaaaacctttcacaagagggcaa  
tcagataaaaaagattagatagcgtatttaggattaaatttatagatcagcgtcaacgagtgatgaacatggatataaagcatgttaata  
aaaaaattcagaagataacaagtctgctatgagagcagaccttataattgtccgaacgataagttgaaaaacattaatacaggtaaagatgc  
atgcttaacgaattttcatgataggatcaaaagggtgaacctctatacgcatacttctgtttgaaatcgaagtttcaaaaacgaaggtctcgt  
cagcagcaccgtaacaacattttaccatctggagacatagacaagaacaacacagattgtgtgccccttaaggtaccaaccgagaaatt  
ttggatagttccatagcaatttctttcaacgaaacatgggtggacacaatctattggttaactttgaccactggagactacagacttgag  
atcccgtgtaatatcatgtaacattgaacctctgtgtgttccaaatctttatggtttgatcagcagttaccaccaccgaggctaaaattccgct  
tgatgagtactccaacttagaccctaacagcggctacatgattgtgaaacgaatacaatggaacgtcgttaaattgtccatacatataaagc  
attatgctttcacctgaagccagttgattatctgacgagctccaatcaagttcaaatctcctgacgggtgagatcggagagttcgaagtaagt  
tcgattcccaacatcacggtgcaatatagtattatcacgtccaccactactcaagacatgatcattccaagcaagggcaccaacacggagact  
atgctcctgcatagtcgagttttctacaagctcagcatccatattccaccattcattatctgcccagacagcaaggtgttcccgttgaac  
ccattttaaagaagtaactgtatcggacggcctaaaagttgtcatgacttttactcgtggttactggagaccaaaaggtatacgcgtgaaccca

agctatagctaaaacattacattgaccccagtcagaagattaaataatagtcacagcaagattaggagcgtccagcactttgtacggtaaag  
ttgggagttttctgttctctgtctccagcagcaacaaaatctcgagtcacagatcggcagggcgataaagaatactttgtacgattgggatcatc  
ctgaaaaagtagctttcttataatggcgaattgttacgttcccggggacataaattgaacacttttctggcaggagtaataggagtcgttgt  
aaggcagaagaagaaggaaaatgtagaggatggagggtttgtaatgtagccggtccagggcccgtatcgaattcgccatcgcgtaattca  
agtagatgtactggcgttttgcatagcaacggatgacggcgtatgctccgaatctccaaactccgaatgtaacagattgtgaaattag  
tatcagcaagagatgtacgacgcttccgggagctgtggagggtcaaacgggagaagctggtccataactcagaagaggaagacctcgag  
ttggtatgaacctatctccgtcattccacggattcgtttttgtcgggtaattgtatattcgtttgatcggttcctactgagcggccacaacgga  
tcctgaccttactattagctccattactgaaccgagattcgaagaagaactcgcatattcatgatgtatactggttctacggtcgatcggagt  
ctctgaaattctatcttgcagcagcgttgctggagtcgccgtcccgtattcttccatagccgaaactgaagtcgccgatttcaattgaagcaattc  
ttgttttaggaactctatgttcaactctatactttattcttcaggctctttattgcatcgaagtaattatacggttttgtataaaaaatggttttag  
aatagtcttcaactggttgtagttgatgaactcgccagtactaaggggtaagtaagggtaatgataagtaaaaaataaaccacctcgtt  
acgttaggcgactgcttgaattatattagctcaccttgaattcttctgagaaagaataacgaaaaagtatcgcgattgatcattgttcgta  
acttaactgacattttgaagcataatcattaataataaataacgagtaaaaagattgtaccggttataatccctattgcttccacactaa  
aagacatgcaaggtgggggacggagatcaatgggggtatgtacaatgctgtactagcagtagtaggtggaaggaaggccaggtta  
aacctgaaggcagaagtaaaaggatggaaggagtacttactggcatggctggaggcactaagaatacgacaaaataagagcatttctaaga  
gagtttcaaaagtgtcatgaacctacattttgccgagcttattgaaaaacttactgtaacaagtaaacatacaataaaaaagaaaggat  
gggtatagttgtggtccagtcgaattgaattgaaagtaaaaaaaattgcatcactttatctagctgatttttgagtctatcactgttg  
tatcttcaaaaaatagcaagagcttattccaagcttattcagctaaagttggatctgtaaaaaagttcaaaactggagcgaatctgattaggaa  
gagaaaaagtagacatagttttatcgttatagatcactttattgctttagcgtcaattttcattgaggtagttttgctaaacactaaatcataca  
gaaggaaagagattgggattatataaaaaaagaaagctcattcaatgattttcggaaacaagctattatgacacta  
tccttgctacttgacaatgaacaatacaaatccactactggttcaaaactcgagcagctatgtactttgattctattgtagcacagctacaaaag  
acatggcgttatagaactcttttctatgttcttttagaataatctgtaggggtgattttatcatggattcactgtttaagatcaaaatgagttttt  
cgtactaagaatttcgaatccaagatccaattcattctttctcaaaagactctttctttattcctttttggtttacgacgacttgcaataa  
ataccacgcaaaaacaagaacaattgaaattcacataaataatcctcaacagaagaaccattcagttagaaaacatattacaagtga  
ataattctaaacttgattataacataaaaaatcaatgaaatgatctttcattatgactattatgaaccaagtaacgaacatgaaatacaacc  
atgttactgttagtagcatgatagatgatacagtggtttgtgaccactgtacttagaattaaaaaaggttcatttttaagtagaaacaat  
ggtaaaatcctaattctgtccttcttttagttgctcggtttgacagaattgaattcttgggtatttcatcttgctcacattgtcattcttttgg  
tatttctgagattgtaattcattcagttttaaactctctttttactcttttttcttcttttcttcaatctctttcttctgtaacgtttaccaacat  
gtccacagctaattgctgaacaatcgttcgggttcgccaagtctctcgaagaattatcaacaatgccgctgactcttaccgtggatgaagaa  
aaaaagaaatcataatacaacccctcccgaaggattagaaaactctagacacaggcagagtcggaggacctcgagtattcattcctcgatg  
agtttttgccttccgttttgatccaacggccaggcgtctgaagaagaagctatcttcaagaataggccctatthaattcattcagcattg  
gagggtacaacacctgtctattcacctatggcacaagcgggagcggtaaaacatattcaacaattgggtgtcgggacaagctggattgatccc  
gagactttcaactttcttttaagaaatagagaggatcgaagaagaacgaatgctgtcattcgcgttccatttccgtagtagaagctctaaac  
gagacagtatacgaacttgaatccaaggaatccaagaaaatgatatccgaattgatcttctacacataattttccaaggattctccaa  
ttgaaagttgaaaatgctcaagagattgatcatttttgcggttagcggtaacggatcgcattcgtggttacttgggttttttttttttttaaat  
tgagtattaactaacttcatatagacaagaaaaaccacaatagcagatcaatagaaagtcttatggtcataaccgctataatttttaagtcat  
caaaaatcccgaaaactgacaagcaaggttctatgcaaaaagattcttacttaaaaatcttagatttaggaagtttgaccgaagcttaaccg  
aaaatcgggaaaggataaccaagcagtcgcccgtataacaactcttattctgtattgaaccgagtcattgctcccttactagcaaaaaa  
acgatctcatgattcttataatgattcactccttactcgtctgctacgagacgctttaggagggaaatgcaggaccgttatgttggtctgtgtcgc  
catgctgattttgacgatacttcaactctgagatagcgggaagcagccgaaaaattaagaatctctatcttaaacgtaagaaaagttag  
ctgattctaagagaatgaattgatacaattctttcttggagctgtacagagttcaaatgaaacgacatgaagaacacagcaaaaagctgt  
tagcaattattgaggatgtaaagacagagtcgaaggaaggatcgaagcctgaaatcacaataactgctgtaaaaaatcatctttgcttggct  
gttgatgcatactcaaccagtggttgaactttcgaagaaatcgtattctgtgtcaaaaaatcttcaacgagatggttcaacgagagttta  
atagtttgaaaaagatgtaaatggttgcataatgatttgaagcaatcgtagtgctcccatgatttaatactcaaaaactcgaatattgaa  
gaagaaagcctgagacagattctttagattaattagtcttaataaataacataatgaaagaaaggatgtaaaaagatcaca  
aatagcgttaaaatctattagaaataatagtaaagaatgacctgatctcatcacataattttccgctttagtgaattgcacatgtcaatt  
agtgatgatcttctattttcttggttcagttcaatacaacggacgattctcaactgcaacttcccgcacttattataaaatgcttca  
ttagttcataatcaaatattacctttgcttttgaacattacttagagacaagaaagaatgctttaaaaacattaagcattgaaacactcaaggt

cgatactaaccgctttttaagggttcggtggctatatcgattcctatagactccaatctatcaactgtttcatcaaaacagtataagttgccgca  
aaggaagaaacgtatcttcagaactgtctccgtccagctcctcaactcttcattaaagctagttggatattccctctaaagattgttcactatttct  
ctgctaaagcgtttattttttcacgaaaagaatcaaacgaagtgaagtttaggaatagcatcacacagtcctataagtctaacaagtttgattg  
cttttgccaacagaaaatctttttctattgacttgaaaaataatcttccggatattttctcaagtttgcaataatgtctctgacaagcttctg  
actttgtgtataatagattcagattgtgtactaaacggcaatagggtattttctgaagagcaaaactttccaagaatagacaatcctttt  
cacagaactattaaagatgaaagttgtgatgaaaagattgtatgtcatccttcattccgcaagcttgtaaaaaataggattgaaatgatataa  
gttttagctcgcctgctaagttccagacatcggttcaaattgaggtgaactgttagaatcacctctatcaaaacagaaaactttagaattgtgatac  
tcaagatcattgattcttctgtaaagagttcacgaaatgtgggcacaataatgattccataaatctggagatcatcatttgagtaacagggg  
tacttttgaaagtgaatcatacatagatttaagttgtcaaggtctatgtcttctgaaaaagggttttaaatctcggcatgtgagatacac  
gatttctcattgttccaagaccttctgcaaatcaacatcaaatgaagatcccattgtggaacaaaatttagatcttgaggaagcaagtagcgag  
tacacaagtcactgtaaggcaaggtcttgcgaagtgtctggacaaaaacgtatgctcacgaattgagctgatgatctgattatagatt  
aggaaacatgttttaacgaggatactgggtttacaaactccaacaaaattgcaatgtatccgtcatgctcatgacgattgcaaagcgaacatc  
taaaaaggcatttaaagcatcttctagggagaaaattttgagtaaagtaaaggatgcaattatttcttgattcagcgaatcagtttagagagt  
tgacttaacagttccacatagtagtaagcaagcatcatacttatggataagttactcaaatccttatcaccttagggatgcttggattagaa  
catcaaaaaaggaatagacgaacggataatagatacttctgtcatgaagtagctgaaaagtataggtaaaaccgtatgacagaatctctt  
acaaaacgctcaaaaagcttattatcagatatctccagtgaagataattggaaaaacgtcagcagcagctactacttgcgttcattcgtg  
tgagactggagttgatgaacatcattacaacagtcacacaggctagattggattgagataatactgtcagcagctttaaagaagcttgataattca  
agcatacatttctgtaagctctctgttttctctactgtctgtaataaactttccaattgtatggttgcgagatgctatgctccgaaacac  
ctcttccaatctgtattttgtgtgatgaagcgtcaaatccgccattaaaatcagtagccacaagacaatgggacgaaaaggctttccggtttg  
ttcaagggttccaagttctcaatactcgtatgaaacgcgtcgtcaaatgataagtaattccagactgttcttttctattttacttcataaatgg  
tttcattagctttaaataatcattgaacactataatagttcaagggttgtttaccaagagttgctcgtcactttccaagttattggtttaaca  
agctataacattttcgaaaaatacttttgcattctaacgcgtataatgtgtttacataatatttagcactttgttaaattgcttttagtatata  
gacaatgcttctgttaggtattacatacagctaccaaacactatacttttacgaagtcaaacgagatggcaaacctggagagaggaga  
ctatatatatatatatcatgtgcaggtgtacgttaatctgaacagtgcttctgtatcgggtgggttttagctgttattgattgaattaattgatt  
caataagttttcaatgagcgtacattgcaaaaacgaaaatcctgaagtgaaggctttgagccaactcctacaagagcacaagaagaaga  
gaatctgttcttaaaaggtatgaaggatggttatgggatataagtgacgagctgaaaatgttgagaagattcgcgatgagttgatgcgcaag  
aaattttgattgttagcgaataatgatcctgaacacctttaactttggctcaactgtcagttgtgaagttggaagatattgaagttacgat  
aatgtagatgggaattctgcagttattgtacatatcactcctactattccccactgttctatgtgcacattaattggattgtcatccgtgtgcttta  
gaacgctgtctccacctcgtttccacgtggacgtaaaaaggttaaaaagggaaacgcatgcaagtgaattgcaagtcaataagcagttgaatgataa  
ggagcgtgttgcgagcatgtgaaaacgagcaacttttaaatgtttgaaacagcatgatgtctacatgtatctaatttttttctcctcaatgaa  
tgtgtaaaataaataactcctaacttatatagcaatttttggttaattgattagcaaaacaataatcccgtctcagtgcttcttggtaattga  
tcgataatcttatagtcgtagttgtatttttagaaacctataactgcgaacagctggccatattgtacgatattatttttccctatacgggaggag  
gcgtgttatattaccaataaaatcttcattagcagtgctgtaatcatgagcttcttagcatctagctcactcattaactgtcatccggtagctgt  
tgtcaataaactcgaataatgctgttaggtagcaagaaagaaaggtatgtcctatacattcatggtcagcaaaaaataaagaatataat  
ataatgaatataaaatacacaccccagctggaacattcatatagatccataaagtaacacggacaaaacttttccatccaacaataactcgtc  
acgagcttctctagcaatttcaaaaataatggttccaagcggactgcaaggtcataaaacgattcccgttctttcacctacacctatacgggtct  
ctcataaataatcatattcctttccaaaagcagcagcaagtttctcataatcattaccaaaccaatccattactagaggtgacagattgaa  
gtgagaatgctcagaccccaatctcgaagggttcttagagcttccaagctcgcacatcaacaagatttttaaaagaaatcgaagg  
aaacaatgcttaaaactgctgaacaaggtattccatgaactacggttcgctcatcctcagattcttgggataagagtggtctcatagaagc  
tttcgatccaagaatacccgatttctcgaagggttaattcattaacagaataataacgtgactgagccattagtagagtttaagagagaa  
caaatacaaaacaacgtaccaataagatccttgattcgttcggttggttatgagcgtctccgaaaagttaatcttttaacataagaatattctt  
ttcatcaataggttcataatcatttttaaaagatctatacgtctacaatattcagcctcggtgattttaagtcccagttttgaaactaacatcatta  
ataaaaatagaagaaaaacaaaggatttaaactttcataccttctgtgagacacggatagcctcctgaatgttggcacgaaactacgtttcttc  
gtcgcataactttcgataaacaacattaaaacaaaggcttttaaatcgatcatataaatctttcctgttctctcgtaccgttctgtagcatcata  
aatagcagcttggccttttctcgaagaaagtttctaaatctgtaaacactgctgaatggattatctctgtaaagtgccagaagactcttcg  
agaaggatgctaacgaagctggttagttaccatgttcaaaaaagcttaaaaaaatcataatataaaacacataccagaaggagctcgtaa  
gcttccaacgcttttgattgttcatcatatactttgcgagactgtagaattgacaatggaatccaagcatttcagatatcggctcatagatacag  
caatgttggatttctcctggtgaaaccagacatgatgataacaagtttacctcgtggaacagcattccactttccgtgctgtatgcttgcata

ccaccaaacttctgtcctcttttctgtcatttgttgcgagcggaaacctcaacatattgggtttatagcctgctcaatagtaacagaacttcttgc  
gacatcttgcaaaataatggtaggggaaaaggctcaccgaaacgaagtgttcaagttcaattcttttaataacaaataaaagggtattcac  
agcaagcaaacagatattctgtaatgttactttcgcaactgcagcttcaattacgttcaatgcttggtttttaaaaaccaatttgccaattac  
aaactgcaaggctctaaagattaagtaaaactgtgacttcagacagaaaagtgatagaaagcctacacgatgatggagcagggtggtgaa  
gtatacaatcgaatccagttaacagtacatagtaaggtatgggttagcatatctgaaccttctcagtaaaactaaataggggagttccatgc  
tctattgaaaagtaacaaacccaaaaataaataactcaataacaataaagcagactaaaaggaatcaataaaaagggttttgtaacaaaa  
acaaacgaaatattaaaaacaaagcgtattcaacaaaacggctacaagaaataatgcaagtgagtgatgctcaccagtaattcaatgaaca  
tgtttgcgctatcgggtacagctccgctttgaaaaatgaaagattttcagctagaaaagagcagcatacattctttctgaaaatcaaagaatta  
tgttattctattctcgtctcgtcaatcttataaattagtcctgatcgtctgcactgtaatgatcgtcaaatgtcttttaggtaagggtgaggcgcc  
atthaagttgtgagggtttactctgtacagagctcagaactgcaagatctgacttaatcggagccattcaattgcaacactaaatataaaatgga  
tgcaaacattgcaatcgtataagtaaatcaccgactctccggtggcttctattgcatggcatctatttaatgacgatgacaaacaaatagtct  
tgtctagtctgggtataacatgaactttctgctgttgaccgtacaatccctaatctgtgtccttacaattcgggtttgaaaaattcaaaataatca  
cctaccgcatgtttgatcttctgtaggcaaagtttggtccctatctcgttttgctttagctatgatctacattcctccaaagccttacagtatta  
tctgttctgtatatactattttcaaaaacttgaccatcattgttattgctatggtagaagtgtttgggttgccggtcatgtttctgcccactttggtt  
tctttgggttgatggttctgtcctctgttggccgcttgggcagatattcaatcctctgctactctgatacacttcttgaactccggttactcttg  
gatgttttgaactgcataaccaatgcccgtttgttcttaccatgcgtaagcgcattaagctcacaactccgtgactttgacacatgttctataa  
taacttcttagtattccaattctagctgttgcactctctcagcaaaactggagtgctgaaaacattgctaaaactttctcctgactctaaata  
caatgtttgatcgccatggcaattagtggtgttcatcggctggcatttcttatactctgcttgggtgttgcagtcacttctcagactactatagt  
atggttggtgcccataaagttacctttggcaattgctggtttattgttttaatgctcctgtcactttcggctctgtcagcgtatcttttgggatt  
atctctggtattgtctacgcttgcaaggctcagcaacagcgcaaaaaggaaagcgtactgtacttccatgaccaacaacctgtaagtgc  
cagttcccaaagtattcgtgatagatgagcaagtcctaattttgattgacttgtaaatcatattgtgtatcattagttgaagacttgcaactattc  
gctgtctacacatccaggatggtcgttactctaggaacaaaagctgctgtatgattattacattttttcttttgatataatgaaatagctcgttc  
ccttagcaaatgtgtaaacgaacaaactattatagaacaataactgaaaaatcagattctatttgattatcagaagtcataactttagc  
atthaaattacggttaagtaacaaactagtcacttgagtgacttagcattgaatttcatgactgactatgatctaggaatccttgtggtgagctt  
caataacggaagagaaaacggattataggaaatcagagttcaaatccatagcataaagcgtatttaggtgacttggaagcgcctttgatt  
agttgaacatcgtttatactgtctcaataaaatctcgagtaaaaggtaccagcataaagatgaactaatccaaatccgaaaggtaactgaact  
aagacttgatgtttattcttttaattacaattctcataaatttgatgaaactaatggctgaatagtcgatcgtgtctgtttacctgtttgttg  
taagtgaacagtaaacacaattttcagtagattccattaacataaaaaggaaatcgtaaaattttgaactaaaatatttaaaaaaacat  
aagttgcccatacactaaattatttcaagaaaatgatcccacgagcatgcaattttgtaatagataccaataagttggttcacatgcaaaaagctacc  
aacatgaataaaaacaaataatcttaatttttcaattatttacttttgaataccttattcaatggttctaccttggagaatctcagcacaacgct  
tggtaacctgtcgtagtaataatcaaacctggctagctgtagtcattttttcatcaattatctttttttatgtttactgaatgaataaacgc  
taattcgaagactctaagtacaacagtaaaaacctatatgcgcaaaaactctaaaggagtaaaatctgctcgtttaaaccacaaaagttataaa  
ctttgtctttctttcttagattatataatataatacaataaaacataacatatttctcataattcatgaaataaacattacagatcttcc  
ttcttgctacttaccacaaagaatcagtaacataacagaattgggttacacagcagatgcttctggttacttagtattcctaaactcgtgaaaata  
attaacggtattgtgaaaaaatgatataactacttaaataggaaagcgtagaaactttatactactgttatactgataaacagagtttctaaagc  
taaattgctaaagctgatttgaagcggaaacgatggttaaactagaaagcggctcactgaattaatagcaaaagaaacttaccgactacca  
agcatttcagccttgaggcaaaaatatttctggtcttttagttaaataatgggggtctttggttaattttggtgatattaaatagaaaaattc  
agagattgcaaaaaaatcttgatatacagggaaaaatgagcgaacaagcagaaacagcaattcaaatgggaagattcggccttggttaaag  
cagttggtcaattgccatggcaatggtacttcaatgattacattgattattctcctcgtgaacaaatctcgaattagcagcatgcttgcggaaga  
atatggtaccgctcaaacattaagctcgtgtgaacagactttccgtctgtccgcttaccctgactcgtgagcgtctaaagctttacaataag  
gtccccgaaaacgggttgggttattactgtggtgaagttatgatggaaggcaataaaaccgaaagcttaacattgacttcgagccttcaaaccc  
attaatacctcaatattgtgtgatacaaaattcacacagaagccttgcggaattgttgagactgatcaacgctttggcttattgttatggat  
ggtcatcaaacctttacggtatggtttctggtagttctcgcgaggtgttacaagtttagcgttgatttgccaagaagcaggtcgtggtggtca  
atcagctctcgtttcgtcgtctcgtgaggagaagcgacacaattacattcgtaaagttgccgaaatgctgttcaacattttatcacagatgac  
aaggccaatgtcgtgcttctcgtggttctgctgattcaagactgtactgggtcaagtgattgtttgactatagactacaagcaaaaat  
catcaggactgttgatttctcaggtggtgaagccggtttcaaccaagctattgaattgtcagctgataccttagctaactgaaatgttcaag  
agaaaaagattattcaaaagttcttgatgaaattagttggactggcaagattgctttggtgtgtcgatactatgaatgctttacaggaaggt  
gctgtcgaatccttcttattatgccgaccttgacatgacgcgctacgagtttaaaaactctgagggcaatactgtagttaattacatgacaaaag

aacaagaagaaaacgacaagaccaactcatatttgccttgataaagaactggcgccgaatggagttggtaacacaatggcattgtctgagtg  
gcttgcgagcactataaggattatggtgcaatttgaattcgttctgatcgctctcaagagggtatgcagttcgtaagggttcggtggcattg  
gtccattatgcgttaccactgatctctcaatgcttgatccagaatctgatgaatttactccgattctgagtaaatataaatactaatattact  
agatttacttttgtatttctatcctttccatacttattgttctctaaaatacattcttttcacttcgaaagggttcataattgctatctattatggtt  
ctggcaattgcaagggttttcggtctaaaattgcggtagatcgactcattattataacatacttctgcttactttgagtataatcaattacttatt  
ttactgttcataagaaacgctttagagcgtttcattgtatctatggtcatagttctaacgctagaatgcaccaatttttcaagattcaagccgatg  
actgaagattcaactaatttggtagtctggtacttataaatttacttaaatcataattcaccagcttcaatgagtttacagttttattaattttca  
tattcagattgtgaagcgcaacgattttgtaaactggttgctatgagaaagtgagaatgtcgcgtgtaataaccacaaccgctaccaattctt  
agaccgagaaagtgagactcttgcgtaaggcttctacttgcaatatgtcaagtgaattagatatgattacggctcctatcctggcaaggaga  
ccgtaaagggttggtttcggttaaacgaatatgtcgctacagaaattctgaaggaaattcagctcgtcaacgtatattgtaattacggattcaacat  
tgcacctcatcatttgaaccttttagcgtacgttttaggaatactatcaaaaagaatggagccgaatcgagatttttagctacatcattcctcct  
ggggagtcatccaagtgtcgcgcatgaaagctgaaattgaggattggatgcttctcaatcttgcactagagacacattattaattgctatgggt  
ggtggttattggtgatttagttggatagctcgtcgcactttatgctggtattcgtttgttcaaatgcctactactctgcttgaatggtagact  
cttctattggcggtaaaactggtattgatccctctcggaaagaatttaattggcgcttttggcaacctttgagagtctatgggatttactcgtttt  
gcacacattatctcctcgtcaagtaataatggcttagcagaaattataaaactgctgcatgtggaatgagaagattttcagttactagaaaa  
caattcttctatcctcatggaagaaattcacaagcccgcttttctggagagtacaagtattcaaaatcaaaaactgcttcaaaagatcattctt  
cttccatccgcaaaaatgcgaagttgtaactctcgatgaacgtgagggtggtcttctgtaactactaaatttcggccatagatcggacatgcata  
tgaagctattttgtaccctcagattctcattggtgaatgtgttgaattggtatgattaaggaggtagaacttgaagacatttgggtgttttgaac  
ctaattgctgttgaagattggctaaatgccttcttattggttcccgtaaagcgttaatgaccctaaaattaagaaatgacaggttttaaga  
ttgcccgttgaagatctattttgaccatggcgttgataaaaagaatcaaggatccaaaagcaggttgaatttgaaggctattggtgagac  
ttacgaaaagcatgccactgtagttccgatgacgatccgttttctctatcttctgacgtgaaagttggtacttttactgaacattctctcgactg  
gtagttactccactggttctaagtctatttctaatctgctcttctgttggctgctttgcacaaggtacttgcgcttcaaaatgcttctcctg  
atgatactcaattcatgatgtcagctttggaatcccttggagcagcaagtttcatgggaagataatggcgaactcttgtttagaaggtagtgg  
cggtaaaatgagccctcctaagatgcttatttaggtaatgctggtactgctgctgttctgactggtgtctctgacttgttcaactaagaa  
taatgaacatggtgtcttactggtaatcatcgaatgaaagttcgtcaattggtccttagtctgatgccttacggaacaacggttactgtta  
aatacttgaaggaaggctccttctcttctatgtcttcgaaagtggttaaagggtggttattgaaactagctgtacagtttctctca  
tatgtttcttccattctatgtgtgctccatgcatctgaaccagtcaacttaagttagttggtgtaaaccaatttcgcaactgtatattgacatg  
actattgcatgatggcttcttttggatcaatgtccagaaatcttactgaagagaacacttaccatattcctaagcgaattaccagagctctt  
taactcgaatgaaagtgacgccagctctgctacatcctctggccattgctgcttaccggcactaagtactattcccaatattggtagtt  
cttcttgaaggtgattctcgttttctagagatgtgcttaagcctatgggtgcttgggtgaaacaacagcaactagtacaaccgttcaaggtcct  
cctaagggtaaattgaagccactgaaagttgatgaaacctgactgacgccttttaccgcttccgtctgtagccgagtagcttccaat  
gccgagggtgatccattactcgtattaccggtattggcaaccaagagtaagaatgtaatcgtattgccgcaatggtcatgaactgtcgaa  
atgtggtgtcgcgcccgtgagttagaagatggatctacattttggcaagattataagacattaaattcctgaagggtggtttatacttatg  
acgaccatcgagttgcatggccttagcttattagctattcttgcaccttcgctaccgttattgataaagcttgtgtgagaaaactggcctt  
cttgggtggatgctttacgaattcttttagagttcattgcatggttctaccatcggtaatgaacaacaggggtcgtgtgattaataaaaatgcttct  
atcatattgattggtatgctggagccggtaaaactacgattggcaagatcatttgaacagcttcatgaaatttgcgacttggatgaattgt  
tagaggatcatttggctatgcctatcacggaagttgattcaagttgggatgggatgctttctgcatgaagagcaaaattgcttctgaattcatt  
cgagaacgtcctcatggttttggccgaagtggtggtggttattgaaatgagcgagtcacgcaagttacttgaaaattatgaaaagacggg  
ggcattgtttacatgttcatgaaatcttgatcacattgttctctatcttcaaaagatatccccgtccttcaaaagatcaagaaaacattcg  
tgatgtttacggctggcgccatcaatggtaccgtcaatccgctcacactattttatcagttcagtttagacgagagagtttagaggaaaaat  
cgaatcctcgatgtccagatttttgaagttattactggtaaaacacgatccttgcagcagcttacggaaaagaatcgttctacattttgacttga  
actccctaattgtgaacaagctcttcttgttaaatgaggtgagtctgggtgtgatgccattgaaattcgggtgatcactgaaggatcctaag  
gctaagaatggagttcccacccttgaattgtcgcagaacaggttgccttgcctgggtccacactcgtttgccattatcttactgttcgcaaaa  
gaaacagggtggtttgttccctgatgataaggaatcagaagccttgaattagttctatcagctattcgttacgggtatcaattttgtgatgtcgaat  
taggctggagcatcgaatctataaccaagattatgaaagcaagagaaacactaagctacttattgcttggcagcagcttctggtacttggctt  
gggctagacctcatgaatggatgcaaaaaattgaattggcatctcgtttgctgatattattaagcttgttggtagcccaaaccttcaacgataa  
tttagagcttgagaattccgtaattctgtaactgtactatgaagattcccttgattgcgattaatatgggaagcaaggacagcttccagaatt  
ttaacaagttttaaactcctgttaccatcctgacttccatcctaagctgctccaggtcagttgagtgaaagcaattgcatgaggtttggctt

attggcgaattgttctcaaaagtctacgtttcgggaaaccaatttcacattcacgttcacgtctcttcacaactgcatatggtttgtgggt  
cttctcatacttatcaagcttacgaacaaactctgttgaggaaagtgacttcacagccctgattttgtggagcaaatgtcactatcc  
cttataaactgccatcatgcgatatatggacgaattgagccacgaggctagattctttggcgtgtcaacacaatcattcctaccgtgaaggatg  
ggaagctgtgtcttccgggagacaacaccgactggcgtggatctatgatactttactgctgccctggatggaatgtctttggttgatccagtg  
tttagtaattggagcaggtggcacaagtccggctgctgtttacacattgcatcattgggtgttccggatattatcttgtgaaccgcaggtaacca  
actcatacgcggttcagaacgtattccctcctgaatacaatattaaggtactggatccgataaggtaacgcctgaagaaataaagggtgtctcc  
attgcttcggccatttctacagttcctgctgatattgacttcccgaaggatggatcgtttgggtgaagacgttgattgccactggcgataagcaatc  
tatattttggatagccctacaagccattgcacactccttgatggcagttgcttctgagcatggatggcgttgtccagtggtctagaggtattggt  
acgtcaaggacttgctctttccaatgtggaccggcttgaatgctcctttattccagtataaagaagttattgagtaaatagacaaattgccg  
tacatcgaataaaacagttttggaatctacaacaaaattgaaagaatgtaggatactttgtgttggtattttaatatagtgatctattcattaga  
acaattcacacagaaagcagtcgctgaaaaacggattacaactgttacgagctacgactcaagatgaataaaatgcaaaaaatgtaggtata  
tattaattgtttgaataaattattaccggattagaatcggaaatcttcatcattgcatcattgcttcttaccggcctctgcaataaacaataatg  
tacaagtcatgcttcggtaggttcagaaaaacggatatacaaaatgaatacaacaaatcattaaacgagtcagaaaagaaataaaacg  
gcggtatacagaaaaagagtagaacaacaggagaaaaaataatgcaatgccatgcaaggctgcccataagtgaaatgaaaactctgttt  
aaccaccgaaaccgtaaatggtagcccttgacgctcaagagtagacaacgtccaaggaagtgacggtcttacgcttggcgtgttcagtgat  
gtgacggcatcacgaatgacactttcaagaacaactcaagacagcaggggttcttcatagaccaagcagaaatcgttttacaccaccag  
acgggcaagacgacgaatagcaggcttgtaataccttgaatgtgtcacgcagaatcttacggtgacgcttggcaccgctttccaatccttt  
accacctttaccgagaccagacatgattcaacgaaaagaaaaataaaaaagagtataaatcgaaaaaattagatgaatgaataccagttcct  
caatcggcaatgaggaagatacactacaggagaataagcaattgcttcagaaacgctacacaattataaaattgtgttatacaattcaatgctt  
tgttgaagtagcgtgttgacaagttgatgcaagtcgacgcgctcgatatatgtttaattcttcatcaaaaaccctaaccccaaaatagatgaa  
gatgtgtgacctgttatacatataataagaggatccacaactgtccttaaccaacaacaaagacatttgagaatcattgtttacaggaaa  
gctcgatttctttccaagttttattacaaaattacaatggctgactaagcaactgcacgtaaatccaccggtggaaggtccccgtaagca  
actgctccaagcccccgaaggccgctcccgaactgggtgtcaagaagcctcatcgttatcgccctggtagcctctctgtgaaatt  
cgtcgttacaaaagtcactgaattgttgatccgtaagcttcttccaacgtttggtcgtgaaattgctcaagactcaagaccgacttgctgtt  
ccaatcctctgctgtgtgctctcaagaagccgtgaagcttacctgtctctctcgaagataccaattgtgtgctatccacggtgaagcgtgt  
taccattcaaccaaggatagcaattggccgctgcttccggtgaacgcgctaagtagcatatttctgctgatgattgtttccgctgttctca  
tagtgattgtgttaagaatctataatgttggtatgaggtgggtattgggtctacgtgtgagtgatgaaagaaaagcgggaagttatgaaa  
agaagaattgggtcgggactgtgctttctatgcttctttgtctttgtcataaagcctaacgtttctgtatttatgggacaggggtcctcaca  
actgtttatcaattgttcatgtatattaatgagttgaaacaacaacataataataaattttgtattctccaatgattggatgcacaagacgt  
agcgtgaagcatatctggagctttgtagcaagccgagaacggttttctctgtagtaggaaattataaagtagtaactctctggtttctgtgac  
acttgattgagaacatcatcctagaaggatctttttatgctcgtgaggtcattcgtaagtcaactataggtttccaccagcagccaactact  
tccatccttgccagtaggaacgtagtgcggaaccccaatttagcaatttttttcaaattctaattattaataactattttattctacgat  
ataaaaacgcttagaactgtgtcgaacgggtataatacaagtagctgattgcgacgatcgctttctctgtccccctttttgcctatcttacc  
aggtttggctcttctccttaaaagaaatctttttgcaactgtgtacctcctaataatgccatccgctcctcataaaaaaacggttgcggtc  
tcttctctggacattcagcattctgctgtcttcatctacgtcagcatctttctgtgtgattgacgattgtgacgaggtgtataactattgggaac  
cgttgactatctttataggctatggtcttcaaacatgggaataactctccgagtagctcatccgagctggttctatatcttttacatgctatacc  
agctacagttgcaaaaactatgggttgagtcgtctccatattttttttgtccgcggttatggcctgtttttctgcttctgtgaagctacactg  
ttcaagctgttgaaggaacttaactgctgtggtccctcatttgacctatctctttgtcagttctggtatattgggtgccaactagattttctt  
ccatcgtctttgctatgaacatggttactcttccctatctgccagttgagcttctcagccaggcgtaccgttaaagcttttcattgtcgtgat  
tggtgcaattttgggatggccttttccgctgccctatctattcctttgttcttctggaacttatggatctaaacgccagttatccctttgatgtctc  
gctggtgaaagggtgcttctttgtcttttgattgctgggcatgtgttgcggtggactcaatctttatcagaaactcaattgtagcttggaaat  
tgttaagtataatgctcgcgaaaagacggtcgtggtcccacatttacggaactgagccttggtggtatttttgtaacctgactttgcaacac  
aatattgcctttggtttgcgttagctgtggtcctttgtcttattgctgctctaccaactggattaatttagattccttcttgcctttcctgtca  
tttctccttttatctgtggtgctgatcttcttctcagccccacaaagaagagcgggtcatgtacccatttatctgttctctgcttagctggagct  
gttgattggatattcattaaaatcagcatgaactatatacaaacgtgacgcaagggctcaatctacatttctgttctgatacttgccttag  
catttaccctttagggatgcgttagcattgccagaattttggcagtgcaaaaactataatgaccaatgattgtatctctgccctcagatacttag  
aaactccgggaagctcaacaatgaatgtctgctcgtgaaagagtggtacaggtatccatccagttttttctctgataacgctcgccttaagttt  
ataaaaagttagttgatgggatcttgcctgctgaattcaagaagataatgttacgagctggtggaatcgtctggatcatgaaacgcctatg



tatatgaacgacctaaacatgaagaaccaaccggttatgtctctatagaggaatgtgactttctaatagattccgagtttactgactcggaaaccg  
accaaacatgagttggtttattcaaaggagcctgggtggaaggtttgtttacgtttcctttattgatacaaagaatactccatttttggagagc  
ctgtcagttcctttcagagatcctaaatggggaaggatgaagtgctttcaaaaagcctgtaaacattacattacctcaatgattgccttga  
ttcatgtttattttgatatgaaattcaattgtaccacgacggttattttaccgatacttcttcaattatttatgcctttcatagaaaaacatta  
atacttctgtagagaataaggaataatatttgaagcttttaataattcttcatatttttaaagatagtttgaagtaatgcaaattgat  
gagcttgagtaattatcattgggtaacattaaactaaataatctattctaatttacaagaaagacatacagaaaaaaaaaaaaaaaaaag  
aaaaagatatgagagataaaaaagaagcatcaagaacgcaggcaagaaaaagacggcattgaatagagaaaaaaagggtatcataa  
acgttcgattgtttcaaataaatgcacgttcatcattaaactgttcatcattctttctgtcattgtgaaaacagaaaggtaagtaagtagttg  
atgtttctgcgcaaaatctcactactctggagactttcagggttggcaaaaagagttgaagacgtgaaatgcttcaactgaatattctta  
ctttgtctcgaataaaatcatcattagcttcaatcttctgcagaggccaggatcgagtcataacagagtaattgacacgatttagtaggattc  
gccaacaatgaagcattgagccttggaacatagtttggaaatgaataacacagtaaaatgtgagaagaattatcgaaattcttagata  
aattcagcaactcgatgcttatgctcagtaagagacctaaggggttagtaaaacaaaggaaacgattgagccaatgaaaaattacttc  
ttctttcaaagacgaggcctgaaaaatgatattaaagataaaaaacgtaccttgaaacgtagaaaaatgcatcgtggaatacaaaact  
aggggctgtaccaatcgaaaaacagcaaaaactgactggtttcagcaaacctgattcagaatcatgtcgagaacactctcttagaattgt  
tccagcagtgaaaggcagactccgggtattgatagtaacaaatgagtagagggaaaatgttgatgtcccatcatataatcaactgtaggatagc  
gtgaagctacgtcttgaagcatggcactgaaaaatcaatcctgtgtctttacgtgactcaaagtcagtttgcgaagttcgcgctagtagcag  
aagcacttgattgataaattgcaacgataattctgaaacctggtctgcatgaggctctgctctgctggtaccacaaagagcaatcctcaaatt  
ctgaaatactttgcaatttctcaaatgactatttctttacatcagtaattgcgacctcaaggtattctatcacctcagtttctgactctttttac  
ctgatttcccttaagcgtgaagctgtcacacagattgcaataacatctgacttattttggtctttcgaataaaaaacgacatgccaat  
cgttagagtgtgatctttctctctgttcttatcttatgctgatcatataaagtgggtggttggggggtactctagtgaaatgtggggcgtgctcc  
ccaaacctaacactagcgtggaatactatgtacacctaaagtgggggagttactgtgtacctgcataaagaaaacgcacaaactgcacaagga  
gggtgccccgggggactgaaattatgcaaaaggaaaatgtcactttgagatgggactttcagaagtgcattgatttaagaccacttttt  
ttgttttacttaagaagtgcattctgtgacagcattcaatctttattttgtaaaacaaatcatcgtgaagcagatcataagaaaaaattgt  
atgagtatatcgaatacgttgactttagtaataaacaacaaaggggtgtgaactcgcgagattataaaagcgtttcgtttcaaggtattga  
caatcttttactgacttaggataagaaggtatagttttttgtaaaagaaatcttttctggaattggaggactttgataaaagaagaaggtg  
ccttttctttactcattgagattatcatagttgtttattcttttttttttttttttttttacttcttcaatgcttctcacgaatgagagataatcaa  
actcaaagtgtctgtttctatattcaacaactaccaacaagttcaaggatatcatcaagaaacataagagattcaatatctgtattttaatca  
tttcagacaattgaataagattgaaattactagacactttttcagccttgattttggctctatacaatcttgaactgactctcccttttttaa  
aacagtctttgctagtctcagagtaggaaatacgtttcagtagcactgtttttgtctttcactttctatagaattactagtaaactttatccctt  
atggaatgactctgcaaggtgtttcaagaatcgtccttcaatcattcagcaatcttttaggattgaaagattgctctccactgaatgaa  
aatacgggtgcatatcaaggtcccaatcaggttttttttttttttttttttttactgtaattttgctctgcttcttcttcaacagcttca  
gacaaatgattacaccgaaatgtgtttgatagagctttggatcaaaaagcaccagaggattttttctattctatcaagccaacagtg  
gacgtagggaattccataacgtccttgagaattaaaaccaagttctcacggctcgttttcttttcaatgaattttataactaattgttagatt  
gtttcaaggatataatggcaccgttctagcctacggccagacgggctctgaaaaacataccatgatggtataatgagttttgaagtaagaa  
ttctgtaatgtctaaattcatagggagccgaaggagatcaaatagtctggttgaccccgagaatgcttcaaggatattgacaaaattcga  
tcgtcccttcgacaaccgagtagcaagttaaagttcttatatggaatctacatgaaaaaattaggatctactttctcgtatgatttacgaatt  
tatttttgagtcggaattatgaagctaactaatgatagctgactataatcatttaaccgttcacgaaaacaaactcagggcgtttacgtagaagg  
tttaaaaacgttatatgtgtcagcgaagcagaggcttcaagcttgaaccaaggatgagttcccgtgcccagtagcaagtaacatgaatg  
ctactagctctcgtatcattccatctttgttggaggtgtacagactaataatcttctggggaacaaaggcgcggtcgtctatttttagtgacc  
ttgacggctctgaaagtgtggggaagagcgggtccggttgacaacgcttgaagaggcaaaaagattaatcggctactttctaccttaggaatg  
gtcatcaactcttaacagaaaaacaaatggtcacataccttatcgtgactcaaaactgaccagaattctcaagaatcttgggaggttaactct  
cgaacgacgctgattattaatgctctccgagctttacaatgctagcgaacgctctctactttacgttttgcaatcgcgcaagaataaaaa  
acaaagcgtcgttaattcagagcttcaatggaagaaatgaagagaaagttgactttataaagcactactgtcattgtgattgtaattcttt  
tgaaggtgaaactgtctagcaacaagatccatcaagttgtttgtgcaagagaaaataacccttctctcatgattgttgcctccagaagat  
tgtctggcagcaacggatagttcaaataactttgagttgaaaccgacatggtttctaaattgacagattcgaagctcctgattctccaattcaa  
agacggaggctgtgaaacaattgtatgcaagagcacaacagagctcaaaaatcgagatggcttactaagctctaccgccaacagctatcgta  
tcttatggaagcattaggagatgctcatgaaacgatacgtagagttggtaaaaaccaacggagtaagcaggacacagatgacatctcaact  
tcttcaacttttgaaccaagcagcattgcaaaaagcaaaatgaagatgaaataaaccaagaacgtgagttattttcaaaaaacttagcatctt

ggacacatcattgacgtctctggtgtacgtccagcaacgccttattcaaacagtctcatctaataagcgtccacgaagtggcactgtcataaagaa  
aatacaaggaggacactgaccttttttattaagataaaagcttccattgcttactgcttgatctctttctacttataccgtgaccgtaat  
ttattctctatgcttggtatactatcatctagctagtagatcaactctggatacagttataccctgctgaatgatgtcaaattttttacattt  
cttcttcttttgacatttcaataggctctattacttgaatgttaagcagttttgtctcatctatctttattattggacgctggaccttctatgatga  
aggcaattcatattttgtgtggtcagttctacatggcatgtactataccataatctctacacctcagaacattagctttcgttcgacctcgttaagg  
ccaatgtggtccggaaaatctggtctggtgaagttgccctttgaacataccagaattactagacaaattgaatgccagggtataaggcag  
aaattaggccgtaggctttgatactttgtgtacgcgacgagacgagaggaagtttagcgaattaccctgagtagttggtgtgttttttttttt  
gatattgagagggtttacctggcagtgctgtgaacaaaagtattcaaaaaactatttttaacctacaacataatcttctaattgagatata  
taattttcggctctttgttcgggctgtttattattcaactcctgctaattgggaatttaaggtagttctggtcttttttatcgggtatggggctttg  
aaagaggacgagttgccagggtcaactccttctcatcttgacaagctgaaagaagccatggatgaacagtttattaatctccaagatagttaa  
ttctttcagaggatcttataagctccagcagacttcttctggcgaattatcttcgacccctataatacgaactcataaacctttgtctcatc  
aagttatccagctctgctgaaggacctctcctaattgaacttctcgtcttctatgcaacaacgcccatcgtggataaatcagacattttatt  
tcaagtgcctgtggcttcaaatattacaatgagccattcctcggcgatcgtttgaacaaagtaactctctatcaattcatcaaaggattaggt  
ggtcacgtttctccggcatcgtacagtagtaaagagaataccacagctaagctagtagaggaaacttacggcttctctgtgatgagccgttc  
gaagggtattttgtctgaatcacgtctgacacattttccgatgtcattgatgacattataactaatttttgaattgtgtttttgttagtgctaa  
tactaataatgtcaactttggaaaaacgtcatagatattttacacagcaatattcagcgtcgaacttctttaaagaacctgtgatactctg  
atgtttcaataccccctggaagttaaaatgtttatatcaagggtctgtagcggatactaaaaggaatgataccaatgattccgaagtcggcaacg  
atgatatcgtgatcaatccgatccgtttattataacggcctccacaggggctaaaggcattattttttccagcgacctctcatgaaaaagt  
cctcttttagatcattataccgttcaaacagctcctgaacgaaaagctccctagtgatactagacgcctccggtttaccagccgtccctctaattg  
cgattatagctattcaacggaacgcgtaactaatacagacagttgctagcggggatagtgctaccagtacaagaatagtgacatctcaataaa  
gcttccaaccattcttctcgaataactttcatgaagcaccgtcccgtcacaactattgttcagaatgggtgaattccggacaggctaaccgcg  
gtatgtatgatgagtttgaacaaaactattgtcacctggcctcaaatctctataggcagtcagccatccaagctgagctaatcgaacccctt  
ttccaaggttacaggaagcttcttctcaagtcggatgagaacgaaagaaacttaaatgatacacaatacttcaacaaagaagcgtccaacg  
atgatctttggggcagcttattgctgaacaagacataacgtatagtttagttcatattcccattgtacatcctggaactgatagatctagttcca  
tcaatcgatttctattgcaatctttttaaagtcgaatctgttccgtatcctgaaaacctttgtcatatacagctgctagttccgttcatattc  
gctgcttacacaaattgtcaagcaactatggtccgagtaacgttcttattataatagtcataatgcaatcaaaagttacattcgacaacag  
gtcaaaaactggagattttgttttaagctcaggttacgaatgctcatcaatatcaaatgaagaacgaagctcaatttgagtgaaaaaaaa  
ctatttaattcttctctatacaatagacataaaaagcatgttcgaaattcacagctaaggtcgtcgtcgaagaacgaaaatttttgcaa  
ggctgaagagagtagttgataaaaaaggcaacgattttgtaattacaacgctatacatcagaaaaactgccttatgataagaaattctcgtg  
aataaaggcccaaatgagaatgattgaggtcgaataacgattttcaaggacgacaaaactcccagatgacgctctcctcttctcttttg  
agaagcataattgattctattctgttcatgtattcattgcagatccttcaacggaaaagtcacttgggttaacggctcgggctcagttgtacagtg  
gtctaagcataaatgaaatttgacaaggcagtttggttcatacatccagatgattacagaattttatgagggattggaagcaatttctatattc  
gctgaagcttttactaaggagatacgttacaacgctttgacgggtgtatcgttttttatttagggctattccactacttgattgtagtggttca  
gtgttcatatttttgtagctgactgatgtacacgaaacaaagcttgctgaatcgaagtgcaaaaacaatctgctgctgctgctaatgaaagt  
aattatcgatctttggctgaagcttctcctcaattgttttccgctagcacaacaaatggaattatataatgctaagctcaatggcttagttactc  
gggattgtcttttagagaatagcttgggttaggttattcttctcgggttatagagatgatcgaagaaatgcttctctgctcctagtagatc  
ctacgagtctaacacgtacgttctgtagatacggtttcttactgatggctactatcgtggcatctggtaaaatccgtctgtgtaataactct  
gcagacttttagatccaattatggttaggtacttgcactgacattcacgatcataaaatgtagaagagaaactaaaagggcaaatgttgaggc  
tcatcgaattgtacgggataaaaatgcagtacctctctaattgtctcacgaaattcgaactccttctatcggtattactgggatggtagtttttatt  
ggaaaaggattgtcgtccgagcaaatgactatgctcatgtaattcaacagctgctgtaactttgctgactgttattaatgatattctggatctga  
gcaaaagtaagagcagggatggcaagttgtcagtgaaagattttcgttgcgcgcatgatggaggatgctaagaaacattaagcacgctagc  
attctgtaaaggaattgaattgaattttataattgacctcaatattccagacgtgctctttggagatcgtaacgaattcgccaagtgattgaacg  
ttatcagcaatgccataaaatcaccgatagggtgaagtaattactactgttccgtggaaaagtggtgagaaaagagcaatccgtagtattg  
aatgggaatgattgatactggaccaggatttgatgaggtaggacaatcgcgcatatttaaaccttttctcaattgatacttcaaatgctcgg  
aaacaaggttcaggcttaggttgatctctcgtgaggttagcagaacttcatggcggtgaaatgacatgtaaaagtgtcaaaggtgtgggaac  
acattttataggactccagattcaagattgataacgaaatcctaattatgatatacctgatggatgttccctgtgtttccatccgtacgaac  
aatcaaaaagattaatgtccaacaactacaacacgctgataatgctggttaattaacaagcgagaacgtgggacaagtaacaactatt  
ttctgaggatggatcaaggtaaaccaaatgaaaatagcacaagcttaaaaatagttcaaagatcagcggataccataatccctttgctccgg

ctttaatTTTTgtcaatgtcaacatctattgatccaagtaatactTTTTggaaactatatcgTTTTcaatctgacggtattctattgaattatgat  
gctttagtTgttattgtctcacacacaaaaattagcagtcgacactggtaattctgttcagacgctcttggatgagaaaaagctaaagatattat  
atcggtcaaggataccactaaagcctatcatcaattgagggaaacacctattaagtccaacgtgagtcataatacctgaatcttTgtgaaattga  
agattatgctactttctTcgtTTTTcaacactgcgcatcttacaggaaatgcaatctttattgtcattgtaaatgcaaagcaaaaagcggcctcc  
taattattcacaagggtgaaattgatcaatcgagaatataattcgtattgctTtgtaaaccctcgaatattccccattTTTTcaaggattc  
cataaatagagatgataacgtaaacgaagcagccaaatgctggaagagtgctgtcgaacgtaaacgcaaacggaacccctcaaaaagca  
ttgaaaaacagcaaatcagggttctcttagcggaggacaatgtcattaacatcaaggcttttagtctgtaacttggaaaaaatggcgctggaatt  
taatgtTgtatgaatggTtggtttccaagagtggaagcgaatgatccaattattactctgattcttatggacttgcaaatgcccgtca  
tggatggataccaagcctgtatggaaattcggaagcatcaattagaaaatggTtataaggctatcacaatcgtTctgagtcagatgctctat  
cgcatgttgcaacgacttgcaagaatgtggattgatactgatttatcgaagccaataactttaaaacaattaactctgtagtactaatTgttt  
tacagcaaaataataatgcaaggggatatttatggaagcactaaactgcggttactgaaatgttattgctgtgtaggattctaaaactgTtt  
aatctgtctTTTcaaacTtggtctctTtgctTgtgaaatgatggacttctaattattttttttatttttcttaagtgtgatacagtgTggcaagg  
aagtctcctcagTtctTtctTgaatactgtctattaatttttttttacggatgtatggagcttctcTcgagtaaggcaatataatag  
aacgctcattcattctTgatcttcacagtcggcattTtaattaagaagtTtttaaaagagaaaaaaaaaaaaaaaaaaataagagccttact  
tatactgctataaataTTTTTTTTctattTctTgtgataccatgaagcatgctgctTgtatactcgaatataaaaaaacatgTcaaattac  
aagaaatagcgtagTgaataaattgaaactgtagaataaacgccttagTtaattgtctactattctgTtcttagTttattctTgtTgctaagat  
atctTTTTctctgactgTttctctTtggttaatgaccgattggctTtgacgggaaaatTTTTgtaatacaattaatctTggtgacctTtagatc  
ttgtccagTtaacatagatagaattaatctcatgctTTTTcaaccaagagcacatacactTtacagtctaatacgaagctgaattctTta  
aagTTTTgtTcaaaagattacgaaagtTatcctTcaattTtagTtattgaatgctatatactTatacgtTTTTattcagtgattgaagTttc  
aattcagtgaggcagatacatgaatagaagcagcgataaaaaataaattTgtaagggaattattacataaataagcaagtatactatggTc  
atgagtaactagaatggTtatataatctgaatgtccaagTcaaatctcctaactgaagatcggctcgtTaaacaaattattgTcaccca  
aacatattttaattcagccagTgggatatttactgtTtactagTaatgaaagtTcaaggaaattcaacatcagtagaagcatttatttta  
ctattgcatgcgcttatttctactccttagTattatcatatcatactTTTTatTgtattaccagactTtagTatgatattagaatagTggcactT  
gtTcggTttatgatggattTctatcgtgattagaataaaagcattTtttagTaaacgtaattctgctTgctctTggtctTTTTctTTTTctTt  
gtaattTTTTattTTTTattTgttaggcaagcaattTtagTaaacagaaaaatgaacactgcgtTactTctactgaacgacagctaagTaaacac  
gtcTgTaaacaccactTtgacctTctaaagcatagtactactacaaaaaacaggtagagatatctgacattcctTaaaatacattatggattct  
aatggaattgccattatgTcaataaatacaccgacagatcctccaactagaaaacgTtggTggcagTtattcacgacagagTactcattca  
TcaacattTaaacctTtgaaacagaaaccacaaatgccgacaaatgtagatgtacccaacctcaggacctTtcgaaatcgtgaaagctacatcc  
acagaggatgcgTtaacgaattgcatattgtctcTcaatggattTcgtgagcagTatcatcgtTgataataatgagagTttcagTcgaaac  
ctgTtctggattTccacaaggatgcttaggtgctTcgcaacctcatcgagaatgggctctTggtctTtaacagcaggtgaatgtTgagTtatt  
gaccattcggaccaaattggagcgcctTacttaagtgcagcagaattagaagtgaattTcaaatcgtaatcgtacaactaatgaagctTtaga  
cggcgaagaaatggctagtctTcgcaagcagctacaaaatcaggtTtTcccctggacagaagattgtTgtTgattTaaagctTtcaatata  
aaggccactgTgcTgacgattgctTgtTgatctTttgctTtcagattcccagaccaaaggaatcactagcaaaacggatcctaattctcaggaa  
tctaactTctcagacagagattcattTctTaaagTgtaaacgtacactccgTctaaaggctagTatgaagcTcctgcagcgaacgcaattTt  
acagcctggattTaaattcgaagacatgggaattggTgctTgatactgaattcagTgcaattTccgTcgtcattTgctTgctTttctcTca  
gggatgattgaaaaattagTattaatcacgTaaaggTattTgctTtacgTcctcTgTgTacagTaaactTtaattgTcTgTcaaatTggTg  
aaatgTcaatgTcTgTgaaccgaagattgTaaatggTcccgaattTcaaaacaaatgTcggTcaagTgaggaaatgTcTgTaaactTtTcg  
ccgatcccgaacgTgagTaccgTgagcTggagaagagTcaggtcctatattattatctTgacgaaatagTgTattTgaaagaaagagga  
agTctggaggTgacactggagTtggTgatcaggtatcaaccagTtactTgcaaaaatggatggTgTgatcaactaaacaatatcctcTgTaat  
ggTatgactaacgTaaagacatgattgatgaagcactTgtcTcccggcTtTggaagTtcatgtTgaaattTctcTctgacgaacatggTc  
gtTtaacaatattgaagattcactTggacgTatggctTcaacggaattTtagaggatgatTggattTgatcgaattgcaaatctTactaaaaa  
ctTtctggtgTgaaattgcaaggTtaattaagagcctTcaagTtTgcatTtatcgccatattaaagtagTactaccgTgctgTtctggaga  
ttTgaaaaacataaagTcaatcgaatgattTtTgaatgctcTcaatgaagTcTcTgattTggTgTtagcgaagaagagctTgaaagTcgc  
gtacagggTggTgTtattaactatgcaagcatattgaagaattTtcagaaaggcaagcTctcTgTccagcaagTtaagaactcTgaaagaac  
ccgTtaattgagcTtctattatctggacctatagctTgTaaactgctTtagccgTactattgctTtgggTctgattTctTTTTatcaaatg  
gTaaactccgaaggtatggTggcatgagTgaaacgcaagatcctatgTgaatcgctgTtTgaagacagTtataggagTcctcTcagTgtg  
attgtTgtgatgaaattgaacgTctattgattgggtcccattggTcccgtTctcgaacactTactcaaacTtTgatggTcTttcaaaaaac  
agcctcTaaaggTcacccgTgcttattctgTactagTtccgagagaacaaatgctcTctcgaattgacatgcaaaagTctTtTgatgTgaaTta

gctgtaccgaatgctcggaacattgaagaattagatcgtgttctacaatctgtagatttttgcgaccccaacattcgggtagatatattgcagc  
ggcttcagggtcacaggaacagaaaaggtaacgttggaattgcaagatccttttgattgctgaaacagctaaacaagacgttgatactgc  
tcttgcttggagacttggcaagagccattccgatggattaagtagaataactagcatcagcagctaaaacttttctcttataattaagcat  
agataactattatatttggtagtacttctgtatcgttgcagttatgagcgatatccaactaagatgtatagatgtcatgaataaattaatgat  
gattgctgtaacagattgaataaattaattttttcaataaaaacaataggttatgaaataaaagacgttcattgatagcattcttgaagg  
atatagttgcatcactacttagtgaaggcaccggctcacttctgctgttttaagtcagcctcaaatattgatacctactcagcttttcttcaa  
tttactgttttttttacgaagaaagtacatatatcttaataaatgatattcaatcccgggctcgtgaagggtttgtgcgacaattgagtagtctc  
ctgcaaaagcagtttccattatgaagcaccactaaaacggcagtagctaatacaaaaggtttccgtggctccttaggattaacgtacatga  
tgaccccgtaatgctgctttggatgcaaatggcatcggatttggcacacggcttattatgatctacaggtatgattcaatagattatctgaaa  
aaatgactcattgttgaagtaactaaccagattgctcaagcttgcgagcctcaacaatcaacgggattaatccactgggcaggaaaatca  
tatgtaacggaagggactaaaggaaaatttagtacttctactctgaatttactaggaagaagaaggaaatggaagtacaatgttgaag  
aactacagactcctgacgctgctaccagtcgccattcacaatattgaaacaaaaacatccgaaaaagtattttatgttcatcaagagata  
gctaaaaacattttgaagccattgaaaagaaagaacatgataattagaccacaatcatattgtttaaggcacgaccaaagtctattaattgaa  
aatgaaacgaaggataaccaaggaaaattgaaagggatcgtaatgattaataataggaaaagaaaagaaggataaaggctatttggat  
tctaaacctctcgttgtaggagataagcttaccacaagaagtcataaacgctcaatgaaaccagcacaatggcgtcgaagtcgaaat  
ccaacaaaaaaagttcctgttttcttagtggtatagagaggttcttgaacaaagaattcaatgactcataaaaaggtctcttctga  
aaaactgaatgagatcttgcgactactatgcaggatagtaataacactagattcggtaaggatataccatataatcagtagtaccatccaaa  
gttaaaaaaccagcagctgcaagtcctcttgaaggaagggttaattctcctgggtacgagtagatccatgggtttagaact  
cttgaatttttataacgaaagcaattcctgttatcctgtgttgaatagaattggtaaattcgttaattctgatcgaataccaagca  
ggattcgcctgaaaaactatcggcacgatgcaagtataacggcgcacacctctatccgaattcactttcaattcttctgatgcttgaag  
tctgaatggaataatccagcaagttgttgcacaattaccctggacagttcgaatcagcaactcgtatctcagtgagactaacatcttcaa  
acatatattgattaatcctcaatgcaattgcatactgaagaatcattcattataagaattggaggaatctgaaaagaaaaacctcaatggag  
cttgccgactgggacagcagaacgttcattcttttgaacggatccagaaggtcctttcttttgaaaaaagagtgcaattttacctgattac  
cagattccttcgacagcgcgtcattaatgaagccgctggcatgtttctgtgaagcgagatttggtaaaggcaactaactgtaccagtgaggca  
gcaactaaggtcatttaacttttctaagcgatcatataaaagaacgggtgactctcgttaatatgcaagcaagaagaataaactgtattata  
ttttatagaaagaataaaaagtataagtgctgattcaaaaggtaaagggtattgaaattgagtaattgaaatacacaacaaaggaagcaaa  
ttctgaaatattccttaagatcatttgaactttcaataacaagttacttttcaacacattaagagcaaggagaaagtctacaaaagcatt  
ttctttttttttgtctccttaaggaattccacgagtataataaactgatgatcaataatgaccgatgtttacattagttttgattttcagcaat  
ttgtaaatcgtagcagtagcgtatggatgtaacgctgcttgaaaaagataaatgctagtcttgcacaaaaagacttctccaaagtctctca  
aagactatgctttatcataaggttggtatgcatccataatgacaggttagcaacaatgatcgtcaaaaagaataaataaacaaggttaattc  
gtagcagctgctatcaaccaacatagaagaatttaacaagcttgcatttctcctacgatttttagtagcatccttggatgctctcaaga  
catatattaatgcagactgacttgcagctatttctatataaaaacaagccctagctctacagaatctgatctcaaaaaactaacctaacgagag  
aagtttggtcgaactctaaactagtctagtctacaattggcaaaatcctttttgtaaaatcaaggatgtagttattttattttaacgttgtt  
tctgctacgtttgtaacaatattaaggaatttctaaagacagtatatttttggcattgcaaaagagatacagcgcgtcttcttctaaag  
agcaaacgtttaaaccaaatattttaccttctactaccctgcttgttactgacaaagagaggtgattcaccaggaaaataggtttaattt  
tttcaaataggaatttcataatggaatcaagcgtggaagagttagataaaaagtttgaacataggcttaaatgaaactcgtgtcaaggatac  
gctgaaaaataagaagttgagctcgttgaatagagtaattgaggggctaaattgaacgagtcaggatgcatcgttctgttggcaactgtt  
attgacttttagcaaatgaatcctgaaacagaaggacgaagttgcttacacacgaacctatatttgcctcaaaaatagcaaggagatttaa  
agagcaatctcaagtaagcgtgctattgcttattgcaaaagtagagactccatcaatgaagaagaattgacaaagaatcggcggttggcgtc  
acctgtacaccagaacaatcaatgagttggttagccaatacatcaaaagaaatgaagcaaaagattagtagcaagataactccttcaatg  
ctacgacatccgattgcccagcatcctatccttaagtgggcaccctcagtggaagtaaaagcagacactgatcagaataacttagaacttttag  
gacaaaagatgaaagagatgctcctgctggttaaaaaggcaagggaacaaaggaaggcggacacgaaagatcagaagaaggcgcga  
caggctcaagaagagcaactataatatttgaagaaggctttagcaaaattgcacaaacctggcgaaaccacagctcattctgagcgc  
catgaaagaacactagaagcaactggcgggtggtgtgctcactcggttccctcccgaacaaatggatattcctcatcggccattccaagccat  
cgctgtcaattttgggttggcgtatcacaaggtatttgcacttgcgtttgacgacaccaatcccaggccgaagaagcaaaagtattttag  
agtattaaggatattttctggctggattttctcttcaaaaattactattccagcgatttttctgatcaactgtatgctcggcgaagcactga  
ttaagagaacaaaggttatgttgcactgcaccgatactgaaattaaaaggcaagaggtggtgaagagcgtggccccagatgctcgtt  
caccgtgaccgtcccgttaggaatcgtggcagaatctcgaatagagagatggaaagatcgtcaaaaagaagcaattttgcaatgaaac

aggatctgaatgacggcaatcctcaaatgtgggatctcattgcctaccgcttctcgatactcctcatcctcgtacgggtgacaaatggaaaatat  
atcctacctacgattcactcactgcttggtgattctttgaaaacatcaccactccctctgcactaccgagtttatccttctagagtcagctatga  
atggttatgtaacgctcttgaggtatattgtccagccaaaggaatacggctgttaaatgtttagggacacttatgagtaagcgaagatcat  
gaagcttgttaacgaggggtatgttcacgggtgggatgatcctcgtttgtttaccctgttgctcctcgtcggctgattccccgggtgctatactc  
gaattcgttagtgaggttggtgtaaccaccgctgttagtaaatagggtgctcgtttgaaaattgcgtccgttcttctcgaaaacagtggtcca  
cgcttatgtttctcctgatcccgtgaaggttatccttgagaacctgctgatgattaccgagaggagattcagataccttcaaccctaaggacc  
cttctatgggatcccgactcaatatcttaccagaccgtatacattgatcgtcggactccgtgaagaggctcaaatgacttttccgtttaact  
tgaatcaacctgttggtctctccgagcttctgacctgtagtagcgaagaagattattaaagatgataacggaaacgtagtagaaattattgccg  
agtatgatcaaacggcctctaagaaacccaaaactttgttcaatgggtttctgaagacctgcaagtaatagccagttcgttatcgaaactc  
acctacaataattattcaagtgcgacaatctgcgcttgaaggatcatgaattagctgaccagctgaatcctgatagtgaaattgtctgaa  
gaattcgtatagagactggaattcatgattgatcaaaactgctcctggccgaagactgattcatctctggttgataaggctggaaatcca  
gagagcgttcttccaagctatcgtgttggttacttctgttagataagactagtaacgctcctgacaagctgttttgaaccggattgttcttg  
agaggagaagagtctgtaaaaataaggactaagaataaactctgtcgaaaaaaattgtgaataaaaacgacttgaggtgtagcaacctgg  
attccttttaggcacctgttatttttgaattggctgaatagctcaacaatagatttcttattaccaatcaagtttttattgttagaattcggt  
ctatgctctaatttaggtttgggttcgaccattgtttgtttacatctgaccatgttttgaatatataaaggatatgtccatgaaacggcttag  
cattaacgcatacttattcattcacttagctgtattctatatactatcaagacgaaagcagattttaactatggttcttgctcatttattttatgc  
tcttctgcttttaggatctggagcccttgagtctttgctaaaactaatcctattattactaaaggaaatgcgtttttgattcggttaactggtgagag  
attctatctctggtgtcactatcagcctggtggtccttcttattaatagatcccttggttcaagtgttgcacaaggatgttgagatttcaag  
aaaatgggagttaacaccgttctgtttatcaggtagacaatgcagctgatcacgatgattgcatgaaggcttctgaggacgctggaattatgtc  
atcctgatctcaatactttcgtcattctatttcgcatccgatcctgcaatttctataacaaggatatattgcagcatttctctactgttgatgc  
tttcaaggactacgataatgtactaggcttcttccggttaacgaagctgtaaacgatcacgaaacgacagcaattacctgggttaagctaca  
caagagatgtaaggcttataaagaacatgctagtagacaaataccggtgggatactctgcagcagatattgccgaaaatagactgaaatg  
gctcattactttaactgtggagatgaaagtgcgctgctgattttatgcatttaacatgatgaatgggtcggctcactctagcatgagcgttccggg  
atacttgcaccgcttagggaatttagtactattccattcctctattttgtccgagtttggttgaactgttgagattctgaagatcaaaactcc  
agatcgtccatttacggaaatgaggctatctattctctgagatgactgaatcttccggaggactggtgtagcaatattcagccgaaccaa  
aattatggtctggttattatgatggaatggtgaccgtaagatttcaagaattgcgtaacttataagcaattcaaaaagtacccaatccaa  
aaggagatggaggttatagaaaagatggcttacctagcagtgcttagaaactcgactatttcaagcatgggaaactttgctcctatgccta  
aagaagctaaagttacatggaagaggggtgctggagaccattaggtattgatggtctaccaatattggtctccttatcatagcgggtgacgatg  
gacagtatactgccccaaagcatcctaagactaagccatatcaattaacagtacgaacaactctaaggttaaccaaggagacgaagaagg  
aagaggaggaagttatcctcaagaattgcctttacagctgttattgggttgggtgctgacgctctatgcttataaaattttagttatacaa  
atattcaattgtcgggagttaggcattggtatgaaagttcaaaaactgaaaggaaccggaaaggtgctgtgcttgatacaaaagtttatt  
tagcagagatatactgctgttttctaataatgtagttgaacgtctttaaataattctaagtgactgtagaagaaaataaatacaaacattaggt  
cttatacttgactacagaggagagatttaccctgaaatgaatttctatataatagatgagtgcaagctgactgtgcttacttaacatgcttt  
gatgtcttgattactagttaacatagtaacaagtagaaatatacaaaagttaggggtgattgatgatactttagattttaaactgagcattacgc  
taatttcattagatgaaaagcagattgctttggacaattgtcaaaagctactgatttgcatttccatttcatggacgaggatttcgagtgcgagt  
aggatgaaaaatgaaaactacagaactgaaactacgttacctctccagcctgttgctcaaaactgaattctatacagatgaagatgtgtttcc  
aagacaaaaactctcgaagtggtggttattatgaaactgtttttgggttggcaatgtacttctatagaaaacatcaaaaagtaaaattha  
tacattctccaatctgaccatattgaaacaaacaatcctgaagaacaatcttttatgttaccctgaaaagtaacaccagttttgttacctatca  
ggtaataaaaaactcagatcctttgcttattagcgtccaatatagtatctcatcagtaataacagttatctttgcatcagacagcctttcc  
aattttggatctgaagacccttttgattattctcataggcctacagaagatccatcaagtagatacttcaatttcaaagcgaaggccagtg  
aaagcatacatagttcagaaaaaaaagaacgcagctcaaaatactagaagagcgcgacaccgacatcccaattttgagcagtaagaagta  
atgcaaatgtttgctacagaaaaatgactacgacttctaaagaagcaaatthaatcaaggaaagataaatttaacttgattaactaagttat  
atacagagtgaaatcatatttctatttcttaactagataaacaatggcttaaagtagtcagcggagaacattaatacaattaagacatact  
agtgagacgggtccatctgatatactaaaagcttccatagaaagcaaggttctgtctttgcatatttgcagcttgatactgtcagttagcatgct  
attgataacttttaagctggaaagcttctgtagaattccaggaaccaaattcttcgagcggatcctcgaagggttaagaaaagacgaatgga  
agaaaagacatacaactaatgaagggtagatttctctatgactagatgacgatggtttaaaccgattttcaatgggaaagagagatgagat  
ggatgcacctgaagatgtacgtgttttctcgtgtaaaaagagggtggcattaaagaaaaacaagcctaataaggtttaggatagatt  
gtgttcttcagaatgtacctcgaaaaaatgaagagtgcccgaatgacagaggttcatgttgaatatccatcttcaactgtcactat

actggatgcaagacgtagacgcttctaagaccagattacgcatctcggataaattccattattcgagaacaggattatcaagaatcagcacgtt  
cagacgtagctacagttccgacgcatggatgacgacgaacaaaacgaaaacatcactcaatctcaaacaaaccaagaacagcttc  
cttctcagacgctcaagattctcacatgaacgaagcttctgctcagaacagttcgaatttattgaataatctcttctcagcggcccttacta  
cagtgagcttggcagtggttgaagccctctaagtgcagagaactattatctcaagaaggcgtgtgatcaattgaagccatatcttctcctga  
cacaccggccaccgtggaagctgtaatggaagtttaaatagctcctcaatagctcaagcacttaggtcgtgagcaaacctgaattcgctaa  
cggtttgaggtcatttccgcttggttatcgcttgacgaatctgctccccagcgaggttggtgacctgcaattcctaaaggccattgctgcc  
aagtcaaggaaaacgaagatcgcaaacagcagtaaaatagcttaagaaaaggatcattgtgaccactgaattcctaaatacaagcttcttta  
ggatgaaaatgatagaaatcacttacgattgcgaaaagcagcttaaatggaattcattcgtgcatgtgagatgctgaaaagaaacagctca  
tatgagttgaaaaaagagaaaaacgataaaacaggttactaaataagatgaattcttcatgcccgaaccaaataatagtaggtcgtatcaatt  
ccgctcagacgagagaaacatgcaaacactcgtaaagaggaataaacattatattcaattaatgttattccaattaagtaattttgacaatta  
ctaaaaatttaaaacacggtcagagagggactcgaaccctgcacctcatgattaacagctatgcgactaaccaactgtgctatccgacctga  
attgatatgccgtgcatatgacttaattataactaaaaatttagtaatgggaaaaatcaataaggaaaaattggtgtaaacacaccaac  
cttttattatatttcttcttctgatcaaaaaggtgttgcgtatacagcaacaggcttggttcttacttctcagctcagcttttgcc  
aacgattttccttagcaacgtattcgacatgtttgtaaaaaccaagaaatagtgccgggttcaaacgtatttgatgaagagatagctacta  
acatctgacattcgaatttgcgttaagattcgttgaactgttagttatgtttgattttgctcattcaagccagttgatattagacttttctgtga  
gtttggagtaagaaaagtaaaaaaggtactaagaaactgggtttgtctacattctcgttagagtcctcactgtctttcaaggtttctt  
cggagtaaggtggaattgaccttcttctcatttctatagctatcatagttgatcgatgagcaaaattggttatgcaataagtagtaatccgag  
ttcgtgaacacaagtcgtagcagcaagcgtaccctttacattcgttgacctctccagtcgattatcttctgtaataatgattgaaatc  
ttcttttaaatcttgaataggaacgaaactagttccgaggatagatctgagcgaatagaaattcgttcgaaaaatgtagacatacccgcaacga  
aaatgacggtcttggttgacacagctattgaagtcctacacaagttgttgaacaaaagaaatagcgcagaatcttctggatcttctgatgat  
gagattatttcaaaatcctcaagtgatcccaaaaagcctcgacgccgaatcgagccgagcgttttgagcagctatataatcaacaagg  
agctctcagccaacaaaaaaattgtatctcctcagagcttcccaattctccgaattgctctcctcgggatctactttctgcatcgtatga  
cttccactttaaaagataccctgtactctattctcaatgagcaagcaacagggaatgttattgaggatattctgctcctgatactgttcccaa  
gaacgtagatactacgactaccctgttgatcattagacagtgaaagcggatgaggtcagatagagctaccctactcgacgttctatcagagc  
accgcaactagctttgattactggatcgaatcaaacctccgacaaagttaccctaccgaaagtgaccatgatttaacgggaaactaagca  
aagtacaaggcagaaggaatcatctctgatactctatttcaagccgaatattggtagatgttattccctaaatactagaaaaaggaagg  
ctgaatatactgctgaaaatgaatttctagcaatcgctcctaaaggctgattttgatgttccaaggaaacactgaaagaaaattccaacgtttt  
ccctcattcagatgctaaaacaaataataataataattacaagagatggtaattcaccgaattggggatggaatcagagcccataaga  
ggcaaatcgaaatagacaaaccacgctatcttctcctgattgaaaaatttccaattcaattcacaattgaaaatcgctgtctggcttctt  
taagggttatctgactttactatctcgcagacttctatgtcagacaatgtctacagcttctggaatccctcaatttaagatacaattgatgattc  
tactgcaagtagtgaatgtgaaccagctaaaacgattgaaataaagaagggtgacattgttcggtccacagcttgagattaaatcatactgtt  
ttcgggcataccactcaacaggtgaaaacacatctatcccactacagatgcctttggaatgacatggttaagtttaaggataggtaaacaaga  
cgaggttcagtgccatgtctacgataatctaaatcccaaatccgaaaatttaaggaccgtgattttcagcttgccggtaggtcaaacgtg  
gatacagattctaattatctacttcttcttcttattccagaaagcggccatgttcttatactgtcaacgatgacgggtaagaagcaacca  
agtaactatgacggaaagtaaaaaagtttctgattttcatgattgcatattcgttttactgggtgaatactgttgatgataaagagcgttactttt  
gataaattcagtaaaatcatgagggtactgttcttgatgagggttaagcttctgtactgtaattattacaacggaaaaggcaaaattttgtcc  
cgttaaaaccacataaaaggctgaagtcaggaagatgcttttgaatttcagactcgcattctaggaaagtaataacttagaggcttagcttt  
aaacctccatgtttacatcctagattataacgatctgtatcgaaaaacagaaattgttgatcattcgcctttttgtagcggccggatactcaa  
aacggttaaatctgtttatctcagcagtgacgaccataacaggttctagttgtatgaccagctcataaaagcttgggtccattatctggaaaa  
cgtatattttttattacaaacgtgaattttctcggaacggaattgctaatgatgagcactccaacgagattggcctatatattcaagcgtt  
gcttttaggagcagaggtggaatataaaaattctgtaacgaaaattagctccattgggatgttatcgtgtctaacttaactctgggaatacgggt  
acaaacgttccagttgttgaattgattatagaatgtgtcataagctattctgatgattcgtttgtaattgcatgattttctaataaaata  
tagtagaacgttggcttgggtcactttgtttacttttgggtgatagattcagttattacattgtatcgcttcttcttcttattatgacataatg  
aatttaatttgaatcttcttcttaactaaatcaatgtatactacttttttcttctgggttagcagttcaatgcttgaggaggttccggat  
cccgtttttggaagaaacaggtttggcgtttcctcaattgtttggactactttatccatagaaaagccattcactcttctgtatggctgaattgttc  
acctaaaagggttcagtcgattgagaggcaatagaaagggaacgaaaagaacgttttaagagagagtcataaaataacgatagactggg  
aggtaaaacgagtccaaagtcgaagtttttttctgaagaaacggcttctacagatgcttaggtaggcttaagctatagaaacctaccaattt  
cctgagcagcactcttgacgaaacgatagggtatcccaaaactcggcgacactcattcgtctcgtgatctgaaattcgtacaggtatctggctt

ttggatcatccgggatcgtggaatcatttctatggcctttccttcttgcagcagcttccttccagaagctatgggagataggatcgaaga  
gacggaagctccggaacaaacatgtaagccatgtgcttttctcagcggaaacgtcctctgagttttattacggttgcttgcactgctc  
tcagcaggatagtaatctttccgaccatttctagacatttgaccaccagtgtaaaagtcggcatctgacaaacatgtttgtccatttccag  
aagattctgggaacaaactgacttggagaattgcaaacagagtacttgcacttctgcagcaccttctcgactgagcattgatcactgcttc  
tatagcagaggccgcgagagcactagacgagggcagcctgcttctaaccacttgaaatccactttgcaacaaagatggcttcttattgat  
ttataactatgacttccatccaaagacaaacacatgcttcttctaagaagagatgactagcaaactgatatccttgcactactgctttt  
ccatacagattatgacatttctcagcttcactttgcaaatagtagacagctaatgacttacctgctacaatccttttgccaaacattctgcatt  
gcaaagtactagatagagagaagcaacgaggccatagataatctaatgactctttagtattttgtataaccagaattgcgtttactttctc  
ctgttattgactattgatcgatctagcaaaacacaaaactggatgagcgtccttcttaagaacatgagtgctttaaattggatcgtt  
tggcggtactttatgataaaagattggcaaagctgtaaaagagcttgcatttaaagctagaattagctaaagagaatctgcttaccg  
accagcaatagagaaaaagcatcttgcaagtagtattagagaaagcggaaaaagaagtttagctgtagaaattttgactaaacagat  
gacaggaatgtattgaaatgggtgctagtagctgattcagacgtcgatatacagggcattgacgttatgccagtcagtctcctttacc  
acgattcggtcctgctcttccccgagaatgggtatgggtgactgcaacttctgacttctgtcggcaaccgattgacagaatccatac  
gccttagactgtagcagaaagctattttgaaaaagatccacacggtgctggttatgctgtagaaacaaatgattggaaggcgcctttg  
acaaagtgcctgatgatccagctcgtcattccccgaaatcagttattttatgaagatgctcatgactatggtccgaatgaaatgcaactg  
cgcagaaaaagtatataccagctccttctgcaatgagcaagcttataatctcaaaatccaaagaaactgaggctcggctgctgaacg  
tgggtggaccatcaaaagaaggcatacttctttcccagtgaaagcaatgtggtgataatgaagatgccatgatgctggtgagaaaca  
attggaacttctctacagcagacaaacatacaatccaaagtgtcgtcagctggtgtagtcagcagccgagatggaacaaattggttattg  
atgatgactgatctttagacttggcaagaaaaatagttaaaggtaagtagtagcttctacatgtaagaaaaatgaaacagattgaata  
aggatcatagttgtattttagtagtagtaggttagtatataaaagccaaaggcagggatggtgccttttcttcttctcagaaagaa  
ggaaaaaaaaataataataataaacagaaagacaaaattttttagaataatctgaaatgctgataagtaggaatcaggtggctgctc  
ttcctgtaaccgtaattgcgctgctttgagcggcgaatggagggaatcctcaaggctttctagagattgaggttgagaaagccaat  
aaaggtgacctgagcagtagatctattgcttacttcttgcaggaatagggcactctcctgcttttagtttgtaaaggcaccctcgt  
tctaagatgatgaccgctttgcaataaccgtagccaaaagcttatcagacatcagctttagctgctgagctgaggagattctgggca  
tccagtaaacagctgctcgtgttattaggaaccagatagctgacatgttgcaagattcaggagataaagagacggcaggagcaggattc  
aacaaacgtcaacatgatgcttgtgagtaactcaactgctttggaccgataaaagaggattttagttgaggatataaaggcctgctatg  
tggattttctcacaagcctgacgaaagggaacatcgacacagctattgctcctcagacaataaaattctgtttcacctgtagactctacg  
aatcattgcaacaccagaggattttagggatgactttaacagcgtcagctgacgttcttcttaaggcctgtaacatacctgcccaca  
gacatcctcaccgacacagccagccatgtagttttagtatcagacggattgacaatcagctacagcactgcttgggttctcttaccaca  
gcgacgctatgaaatccatctgggacccatgactgtttgacctctgctggacagactttagttgcaatacacaatccattgaaagcctgag  
aacgagatattgctcaccgtcatgatcgaagactcaagtgaccgaaatgaggttgaagcagtaagtttcgaatgtaagctagcagcaact  
gaagataggaagtagttaatttagacttagtaaatgtactcaaccgtaataaacgtaaaattttgcaatatcaaacgatataaaattct  
gctttgtttgcaattcctagatgctattcacttttttaggttaacgagcagctactctgtaacaaataagagcttggtttatgcaacag  
gcaaatcgtaagaaaaagtgaaaaagtaaaagaataaagaattggaagaaatataagatcatgacagaaactaacgataaaaaaac  
acaggtccatattcatggaacaaactgattgtgaagaaagtctgaataacgagaaaactttaaaggagattcagctgtaggaattcatt  
gtcttcagaatcctgtgcttcaagttgcaacttttagtgaactagcaggtctgctatttctgctggaatcattgcaaaaggacagtggaag  
gattcgtgcttgcagaaatggagaagcactcgcttatagttgcttcgaaacaatcaataaaatataatagggtatgctgttgattag  
gtcagctcaatttgggaacaagaactggatcagccagaaaatcctaataaggttctgatgacttacagcactttagtataatatt  
tacattagaaaaagaatatttatccattatcaagtcggtatttgaatcgaacatcaaaagaagcccagaagcctcagatagctat  
ttggtgaaatatttctatgctcatggaataaaaaaacgctgaaagaactagtattatagctgtagaaataaaattcaaatgctcc  
acataagattgataaaccataaaaaacgttataaacctttgtaaacaaagcgaagtgaaattgtaacttcttcttattgtactcaag  
ctgcgtaagcgtgcgaatgcttgcctggagccaactcttatctttaactgtcgaatgggcttctatgctacttcattgattttggaat  
gatcagggtggagctgcttagtttggctgactctgctgaaattgcttgcgaaattgttcaatcgaataccgatcaacagctttattgacag  
ctctttgcaattattcattgaaattctatttatttttaggatttcgtaaaagattgaaattcgattcaagcctcctcgtacacattgct  
aatgttacaatgctgctgaaaggactccttgaataacacaaaagacataaaaaattgtctatcaactccttcaaaaacgaagcag  
agaaaaggaaaagacatgactgaatctgatggcctcaatgcttttaccgaatgtaggaagaagacagatcattttcctgaaaatgtagt  
gttaaaagtaaacggaggttctcagttgatctgctttatcattgctttataaattagcaatccccatcgttcaattttcttcttattataat  
ttatcaattgaaaaggatcaggtcaggcaatcctttatctttagcattttctgctgacatgggcaatattccttcttctggttaaggga

gcgttattgtaatcgcaaaagtattagaatgtgttactaataaagcctagcacttattggcctttcatattgacaatacggattgccgctaaa  
gttataatctttatcgtgggtcttgccaacggcttgcagtggtcgttggtggtttcaaaggcttgggaaggctcgcgatggctggtggtg  
ctatctttgggcagttataacatcctgttttggccttggaaatggaattgagcgcctcagctgaaaacaccggttcgctacgctgccagatat  
caaaaagggatgatgcactagctcctccggcagcactacgaacgaagaaatagagttgacagcaatcctaccactcaaaatctacgcctaat  
ttgtttacctttcttggcatgagccttaactcttccgattgaaagtcactaagtgaaaaaaaagaaacattacaagcggttattccgacgac  
gatttattctgtcccttggaaagcgttcttgcgttcttaattttgactacgaaagcactctttatcaaaatgaaatggaaatgacgaagaaa  
atggacattagaaaggcatgcttgcgtttccgccggctgagaggcagatgaatgggttaatatttattgtaataacataactagaacgaacagtaaa  
actgagaatcgttggatcacttttagattcatatacaaggcactgtagtaataaattgcattggatacagtggttagtcttaaaagcaaaagg  
tgactaatgaatcttcaaaatagacctttttgtgtatgtcacttggcaagtaaccgatctgcagcaagtatacaacagttcagatccttcca  
agacaattgcaaaagtaaaaataaaagataatccaataacttttaaaagtagaaaaagtaaagagagaaaagcctacagcaccgccgattccc  
atgtgtctccaaccatagtaactaacgagccctcagacgcttaactgagtgatcggaacgggaaactgggttttcgctaggtatggcctgagac  
aagtgaagtggttagataagataaataacagaatattcacatctagagtcgcttgcgtaagccgtggtcaggctgacgattactctcctaatt  
actttaaccgatctcgtttgactgactcgttgcataatagcttctgttagagtgatcttcattgtcataaaacataaatactggtgatatag  
ggtattactacctgccaaactatagatatttcaagcttctcagtcagtttaataatactagnnnnnnnnnnnnnnnnnnnnnnnnnnnnn  
nnnnnnnnnnnnnnnnnnnnnnnnnnnnnnnnnnnnnnnnnnnnnnnnnnnnnnnnnnnnnnnnnnnnnnnnnnnnnnnnnnnnnn  
ncaagt  
aaccgatctgcagcaagtatacaacagttcagatcttccaagacaattgcaaaagtaaaaataaaagataatccaataacttttaaaagtag  
aaaaagtaaagagagaaaagcctacagcaccgccgattcccattgtgtccaaccatagtaactaactgcagctgga  
tcggacgggaactgggttttcgcttaggtatggccgtagacaagtgaagtggttagataagataaatgaacagaattatccacatctagagtcg  
cgtttcgttaagccgtgtcaggctgacgattactctcctaattacttataccgatctcgtttgtactgatctcgttgcataatagcttggtagag  
tgtatcttcattgtcataaaacataaataactggtgatagtggttactactctgccaaactatagatatttcaagcttctcagtcagttta  
ataacttagatagacgctgttatcatcatagtttaaccagttgtcattctgttattagcattccaagcggatagcaaacgacccaactgaca  
taactgaagttagttcatggtgaatataatagaaagttatagacacacagtaacataaaagggtttgtgtatgaccttcgtcgaagggtg  
caactccttagatagtaaaatggtaatgaaccatttactaggtactaaagttgtttattgaatgctttttatctccatgaaaaacaaaactct  
tttcaactcagggcctatatgatgctatgcttccaaatgctgtattccacatgtgaccctcacaagcctcctcctaaaactcattcaataa  
aatttttattttctcttgaaagcttctcttgcaataatccctggctaactactttttgatacgaactgtttacataaattgcgaggcgtgtcaag  
cgtgctattgtttagggtgttttacgagcagcggattttatataatagaacacaaactccttttgcaactgcttaaaacgttcttagag  
taaattcgttactgaattctgtttatttaattatcataggtatttcttgagaagttcttgcgcaatgggtattcttagacgccttcatggat  
catcgttgactacaagttggttctagcactagggagaaggaacaaaagagattacttttaggagaaaagcattaaatcggaatattggacta  
ggcgcttcttagactgcaattgtttggaacaggatggccgtcgggctcagttgtctccttgaacatgatcagtttagactatgagtgat  
tcgtcaatggttagagaaatcattgagtgctccgattgcaagcagctggttgactggtttatttagctttactggacctggcgatgaaaaag  
tggtatcctcactcctttgtcacagtcacaaaagaaggaagtagggcttctcatcagctggagattctgtttatggagggtttctgagaaca  
ctatcaatatcgtcggcattcgccgacgaatctatgaaaaagaatggcttagctttcaatggcctcgcgcagaaaacatacaatattatcggg  
gctttactcccagcagtttctcggatccttctcagcaacgagcagctgatttctgcaacggaattgatggtgttgattattggcgaag  
agcaaacgacgcttctacgtgagatattctaggtctttaaagcggcaatcatttttagaggaacagacgcttcatgaaattagcgaattttgg  
gaaagagatggtcgttctgcatacagatgaatcggtacctgtgctcctcatttctccttagcactttatgcatagtagaagccttggat  
ggtccagaaaaactgacaatggctgaattaatgaacgcttctcgcaggtccgaagattgcttctagctttatggtaccatgctgatggttt  
ttcataaatacagatcgtagtagcttggaaagaaaatcttcaataaaaattattgctttctatataatttaaatcaataaatacactatt  
tctatttttcaaccatcaaatatcatcctacaactgtctgctcgtatgcgttgcaactgctactaacaagtttccaagagcaaacgacctt  
gagaatgtgatacgaacatctccataatcttttattttgacttttgaattgggttaaatcatttctttaaataactagcgcctt  
agcagtgaaataacgaattgctatgtctacacttaatggacaggtatgaatagaatctttctgacaatagaacttattaactcagtttagacg  
gcactggcctatgcaaaagttggcatcatgttctgcgaaaggtattccatttagctagctgaatattgcaataacgttaatgggcaagc  
acaaactatttccatcctgctcggattgtggcgacgttctgtagttacagatttgaaaatgttgaatttctggtcgaactcgaaaca  
taatactactctcattcaggacgacctggacatttaaagaatggacgatggaagaaatggcaaaaagagaggatacaaggagcctttgag  
acgtgctgtggggaagtcctcctaagaatcgtctttgggacatgcgcatgaatcgactacatatatgatggtcctgatcacccttacaagc  
aaatatttccggagatacaacgacctgtactttccgaactagaaaaataaaggaataaacaactgtctcccgtttccgggtctctgctc  
cataaatacaccatcctttatgattcctaactcgtcttccgacctattttgattacgaacttattccattagcaaatgttcagttaaaaa  
ttcttttaatagtaataaaataaataagattttgaggtgaaaatataaattcattcaactgtaacatcaacgtagtttagcttctcaagtga  
tatttccgcaataatataagagaacctgggtcattcagctcactatagagtagtatttataatagacaagcaaaaaggtttctatgtaga



agactcaaagaataaggtattaacaatggatgtaccagagtaaagtacactgtttaccgggagaaagagcgatagtaactttaataatagaata  
aacgactttgactgcataaaagtttcgattcaaatcagcaagggaagatcatttcatactactacttgaccacacggcgtccttaaaaaaaga  
gatagccaatgaggaagaaaatgaggcaaaggacaaccacgacttaggtggaataaccaggagtggttgatagcagcattggcaacggta  
gaaggttcagcagagaacgtaggctttgttccctggcaacagcatccttctctgtgagggagcgacagcagcctggctccctgaatagcttca  
cgagtgtcattaccaacagtagaggaagcggcatcaccagagggggtgcttccgttgttggacaaaattgttatttctttaggcacag  
gtggaggaggatgagaaggaggagtagaagaaatagtcgcgacaactggttcaggagcactagatccacagatatttgagccttgtttctgta  
tcatctgctaccatgggagcactagtttctcagttatttactggtactcttctcagaagtttgactaatacctgcatcgtcaacggcagagcgca  
agttatcgtcgacggcagcatcagcttctcgttgtgacatcgttttggctcctccaaggagagagcagcggcggtaggagcaatgccgacg  
gtccaatattggcagcttcggaggaagcggtagcttgggaagcatcagcgggttttctgttctcctggaagatgcaggggcgggggcttgat  
ttacagagtagacacatcgaattttcggctcgtgaacaggatttctgtgctttccatctcagacaaaattcttgatagtttcaacacctccgtac  
tctcattaccaattgccatgctctgaatcaaaaattgtcacggcatttaaaatcaggagcaggttctcttcatggcttgaagcagaactaaaag  
ttggttagtcaatcatgctcaggcaaaaaacgcaaccaggctttattaaatgactttcaaaaaaaggagttaactcctcactataaaccttga  
aaacgtacttgtacgttgacgctggacttagcatcaattcgtccagaattgggacgaacacagtaactttaggagcagtcgtttcactttgaag  
atgaccggtccggatttggattatacacagaaattaactccttcagacatagtcgtaaatggaggataaaagtaacattctccactgcattcgatg  
ctcattatttttagcgaacctgctacgttagtaattaaattttgaaattattcactataagtagctaaaaggagcatgctgaggctgctcatc  
ttctataactaatgcttcaatatccactatccagccctctgatcacagaaaaagacacaaaactcgtcaagccctgtttacatacttaataat  
agaatttaattgttttagtaatttactttttctagccagaacaagcaaaattgttccaaagggtgatttattccagttacgagatacgttg  
atgtaggtacatgactcgtcggtagctcggtagcttccggaacctcggtaattttggatgagtcggggctattagcagcatttccctaagttgacct  
tagcgcatatccgcttcaatgaaggattcatgactgtaactgatttttgggaacaaagaaatagcaggtgtttgggagatgttatg  
gaaaaaatctctcgtagaattttaaattgatccacttcatacgttaactagctttttgtcaatctccatataatgttatttctgtcaag  
aaagcagcataaagaagagtagtggttagaagaagtcaaaagaacagtggtgaattttttgaaattcgattgtaatatgtttcttcttgaa  
atttctattgacctttttccctcagtgatcagaatttctgtgctgttttctatcgttgttttcttctgattgagacctcattctttttacg  
ttatacactcaaaacaaaggttcccttttgaagtttctgtaaccaggtttctttatcccgtcctctgctacacctaatttctgttttctatcct  
ttattcaaacgcatgcttttctattttgcttttctgttttcttattgaaagcttcttcttctgttacagggcctcaccagactctcattatcc  
tctccgatccataaacaacagatgtattacaacactgtcctcgttcttccgtagagcaggttcaacgagctatcaggttctccagtagtat  
aggacaaagttaagttccggcaatcaaaaatcttctctctatcctccggtaaaactctcctctgtttccgatcatcagtaactccgacgctt  
caggaactgttgttctcctcatcacaagaaatgccacaaatggattcgttacagagtagctgaccatccaacctaccacagtcagcacaatct  
ttcaatttacttcttagccttactatactgcgacagcgggttagcctctctggttctcaatcttattccccctacggcagtcgggtgcttatt  
ggaattttggcggcgttaattgtgggaagtgtttgtccttccattgtgatggtgtagcgggatctggggacctcgttttggtaataaaag  
aaacaaccaagaaaatgatgaaaatgtcaagatgatcctgagctcaagcaggaaggaattccacaaattactatgcttcaatttttagattct  
cttttactgtatcttgtttctgtgattatataatattatcatgttgcactcgttaattgattcttaccttttttctcacaanaagctattttagatg  
gcatgccaatctgtggaagggtcatgtacgtgcctttgtaatttagttattctagtttatttcatgttaaatttattaaattttgctttgagaaatg  
aattatttttaagcatgcaaatgtttattcatatagtatgtaggttcatgaagatgacaagaaatcgtaaccaatatttaacgtttctcattcgt  
ttccacaggattcagcttgagagaagaaaaatccttttgaagggatttggtagctggagaattcgacactgtttatagatggacaatgcttga  
gccacatagaagagatgcttagctcggcaggaagaatcatggtattggaagctttgcaaggttccgaagttctaagatattgtcagca  
acgtgcagattaaccgcatcggctcatgatccttttggcaatcatatctgacaaaacatcaattccttttctgttagcaaaaagccctatacaaat  
aagttagttacgcatcataaaggaaagatatgaatatgttacctttcacgaattgcttgcctctgccaaggcggcattaatggttcgaatctt  
ttggccttcagagctcaaaaatttctgcttgtttgtcacctcagcaacattgatggaagactgtcttttcttctcagatgctaagatttctgcagcctt  
tgacgttcagcagatacttgtgatgcatggccataacaacactttcgggtggcgaatatcacggatttcatggcgaacagcgaattcccaa  
ttttcagaagctttgtttatagcttccgatatgttctgttcagcgattgtcgttctcgaaaacatggtaagtgtaagccgtcaatttctactacg  
attgtcgtttgagctaattgcgaaatggcataatctgcatcttaacatagctcgcctgtatggatcatacactgaatgtaaaggacgcat  
ctaggccaatagagacattatccaaagtaatggcagattgggtagggtttccaaagctcgtcctttagggattgaatgtacgcaattttatcga  
caataggaacaaggaaagcaacaccagggcttaaaattctagattgaaaagaagattagcagatgaagtggtatttcaaatcttacc  
tagaaaagcgacctatgcttgcacaacatagccatttctgttggacaaaattgataaccgtattaactgcttggcttccagacagggcgtaa  
acatatgcaagaggatgatgtatcgttttgaacgaaaaccgagagcttcagagcacctgtgggtcgacaattcgatcgccaagctcaaga  
gctcgaatgtgaagttctgcaacataaggtgcgaatccggtaacaaatagaaacgattaaggatggattggaagaggaatgtgaaattccacgg  
tagcaagaagagtgtagaaagcaaaaaaacaagaaaaataatgaaaaataactataaagtaaagagatcttcaataaacgtatttg  
attgaaacaatttctttagccgaaaatacaaggttctcgaagtcgtagtatgttacttactgttttgggtttttcagaaccactcaagaa

accaaagaaaataactaaaaataaattctttaaaaaataaaaagaaaaaataattacatttcaaactgtcctgacgattctctcaaaaaacaaa  
atatctcttaatatatacaattacgaacataagtagcactatcatattacaaagaggtcgtttttagattttcacgaaaaataaaaccaaag  
ttgatttcatgaagtctattttctacactcatttagaagccatagattcagacttgaatggaaacgcgtttttccattttggttcaccattccta  
atagaacatcctagtgttttctcaacggcacaaggaagcattaaaaacccctttttgttggtgattattagtcgaattcactttctttgtttctt  
aaagttcaaccgtaaaaaagagcgtttcgacttggtaaaagcgtttttctctgttgtagtttaaatcgttttctgggcttataacgttctgttc  
tttgaagctaattttcttaataatccgtattattttgtcttcttttaaatcaagacgtggtttgggaacatccgcagttttatctttgttgcctcc  
aacatttaggggtttctattttgtgcttttagtcctttctattttgtttcttaattcgttttcttcaattttctgataactcgttctttctctcgca  
cattccttctgtttcaatatgagttatcaagcgtcgtgttcgagagctatgcaagtcataagtagggtaggcttgatattcctattatgagat  
tgaacatgcacttctgatacctagaagagaagccaatcctgtccagatcgggtcgtttcttaccgcatgccttaacaaggggtgaacagcg  
acctgaagttctaattgacgaggtcaatattatcggtcgtattcgtattccattgaaggtatctctctatgcaaccgaaattgtcgatattgttg  
cacaggcggcgatggtcataataccttaattgtgagcactcctctgctattatgcccgtggtcaggccttacacatttgaagcacggaaacaa  
agcctctacttctccagtggtctgctgacctcctatgtcgtttggtgtgattgtcctcaatgctcactgcgaaaaatctgatacctatcgagatga  
atcgaaattctcattttgttcctcaatgccatccaaggctaaagggttcgcgccagtcgcaaggaaattgggtcccttccattttcaatct  
tgttggtcccttctcaaccccgccaactatgctcgtattattgggttagtcaccaacccctggaccacatttgcctcaagctctttgtctct  
ggtgccgatcgtctctcgtctgtttggtgaggagggttagacgaaattccccgctggccctaccatgcctggctagtaaggatggtcaaa  
taactcaaatgattttgactcctgaatcatttctcttaccatcctttatcaagtgttgctagtggtactccctctgctaatgctgtcctcaa  
aggctactttctaattgttctcaaaaacatcccattttggattatgcttgatgaatactgctatgattgcatgttgctggactagcagattctt  
tgtaccagggcgtgatactcgtcaagaaagcattgcttcaagatctgccttaaccgagcttgagcgttcgctcagctactgaaatttcaata  
aaattatctaattggtttgttggcttaatttctatattcctacattgaatgtttttctgtacatatacccagttaaaactgaactttatcgttgt  
gtcctctttttgttttagacattcatactagattcgttacaataaaaatgattgttattcttcatataaactgctattaatctttatcctgtttttctt  
acttctgcctttctgctttacagagctcacaacgatcatccaggagcatattcgggatgaagccaatgtaagttgttctttccctatatacattcgttc  
ctcaattggaggagcaattgagctgtgtatggtggtttatatacattctttttatgatgctctctcttttcaaatggattgctcttagcagtgatg  
tgctctattggacttctgtggcagatgttggataaacaagcctggctgtggatactctccgggtattcctgaggactataagcagaag  
atgtattctggtcatttaggaccaagcgaacagctaaatggtgatcttttctctggatggttgagtcagcaaatgctagttatacaaacggtcgg  
acgttctcagcaattgttcaatttgaacaattctgggtgaagttggctcagttgattaacatattatgtagattataggtgaatggcgtcctg  
gatgctctcagaagatggttcttaattggaagtggaccttacgaattggagaaaataatacattcaactaaatcctggacgatgggatgacc  
tgggtaatcttatttgcgatcagccaaaggaaccgattttcactcgtagacgataattcagagtgacaatgagaaaaatggcgaag  
agttttctgctttttgaaaagttcctgactgaatttctgaacgagccaacgatacttggatatacggcggaatcttacgaggccagatatt  
ccatattgtagcctcaagattgtgaaaagaaatggctcatttggcggtttggctattgggaatggatggatacaacctgtatcccattacagt  
acttacctgaactatcgttagaaaaaggggagattagactgttctcgaacagggacaatacttaccattcttggcggttgcattgttgcca  
ttgaccaaattggaatcgtgctcaggcgcagttgaaaagtcgaaaatttctatataatgatttggttcagataagcctggaaaaacat  
gatgaacatgtatgataatgacttggatctagttatccttctgtggcatggactggcccgtggacctgaaaatttaacccttacttaagcaag  
ccagaggtaatggaagcgttgatgtaaacactacatataagaaagagtggaagagtgtagcaatgatgcgaaatggctatgctcgtgaag  
gattagattcatctcgaatatcattaaagactgacatctaaggtccggtcatgctttttacggagaaaaatgactttcttgaactacttgcag  
gtgaagatttgcataaatcttgaatggaatggcgaagtaggttccggaaacgcttctgtttcttggtttaaaacctggactataccgaaaa  
cccagctggaacttatattcaggctcgaatttgactgttctgctgatttgcgaaagccagtcataatggtcccttatgatcctgatggagatgaag  
gctttgatttctgcttcttggataatgatattcaacgtttacctaacaatcctcagcaaatctaccggatcctggaacggacaacacagtaaat  
ggttatatttaactttgcttctgttggattaacggtgttgggttgcagggattatgctggtcgaattccagctctttggagtgaagacaaat  
cttacaagccttgcctcagtcataaacttcttaattcataagccttctaattgtaggcacaacttcatgatgatctagcactcttgaactc  
ataatactacaatgaggtagaaggatttgcctgtgagatgctcctgtttttatgctctacaagcattgtaaaaaaattgaaccaattact  
ttttttactttatttactttatttattttatcttaataataactccttcaatgaatcttttcatctcaattctgacttacctgacatagtaaa  
ttcctgatggaacagagttcgtaaatttttaccaaacttaagattgatcctatttaaagactgttcaacttcaagtaaatcaagttgtcg  
tttaccatcctatgcaattgtccttgccagaactatctacacgcgagtcgttgactgcgtttgaaccaccaattcggaatgatggtcgttccat  
tgaccagctacgcgttttgcgggacaagtaaacatttgcctggagccatggatcagctcgtgtaaaatggggttctacaattgaggttttagtt  
ggaattaaggcagaagttggtgacgaactattcacggtggaacatttcaggcatctgttgaagtgaagtatcgaaaaatggggaatgaaac  
atctcaaaggaagcttctgcttctgtagaaacaaaaaagaaattgggatcttctttagtgatcgtggttgaagaaactaactttgtttg  
ctagctcctcgttactattcagaatcgagaaacagatattcctccatcatcttacaagctcattgcaggacttctggatacactccctgta  
gattacttaaaattacacctcagagagcatgggtgattcatgtagacgcaattgtcttctgtcgtcctaacgaaaacattatttctgcatt

aagtttagctacttcactagctttacaacaactagaatccctaaaatctctacccgaatgttactgaaatgggttaggaagtagcaagttcga  
gcctctgaggaatatgatgtgactcagaatgggatagtgctcttcttgaagggttgagaactgtctgttatcataactgcaagtagtattg  
accatgttttggtcatagatccaacggtggatgaggccaacgttctcaagctacctacgcgtaggttttacctgatggcacaattcctacac  
ccgaaccattagtagggagggtggtagcctccactggaagagctataactggtagcggtatattcgcctagcaaaagcagcatctgtagcgg  
gtacaaaactgtagaggctagtaaatctctttaaactttagggggtccggttttttgatattctcgtaaagccttcagctgtgcgaaaa  
agaaaagaaataaaaaatgaatctttggatcgggtcaacttggcgtgaattagagggtcgacaattctaaacatgctttgtatatatatat  
atagattatgattacttataacatgggatcaaatagtgaaatcttcttgactaaaaataaaagcgaagcatttcgtaaagcctgctcgaacgt  
tttatctcctaactgtttaaagaagcgtaaattgcatggcaaaaattgaaaacgggcgtatTTTTTgtaaatctaccgaattgtcataaattcatg  
tcatcattcaaaaaacataagagaaagggtagaagagagaaaaaggaaagaataacataaaggaatatggaggagttcttttagaaaacg  
aaacgaaacgaaaagggtgaatcaacccttgaacaatacacaacatgtgtttatgattaaatggacaatttctgctgtctcatatatcatct  
agcatttttggatctcgctacaagagttttacgcttctcgcgaagttttcacttccataacgtcaacaccatctaccctcaacagttgctgtagc  
aatagctcattagccatcagcttttgccttatacttctctgtttatcatcggaactctcatgaacataagtgtaaaaaatagggtgaaggctttgctg  
acatactggcctgaatttgcctcgagatgctgtaaaaatgctggattctgttctcaactgaaacccctttctttttcatcttcagga  
agttgcttttatgctggttttatacacaagacctaactattctttagaccaaacttggccagtgacgtacttctccctcaatcgtttccctgctg  
aaaagagctaaattttctttctttaaattgtctgttttctatacaaatctcaatgaaacgttccagggttcttcaagtcgactggtagcgaattct  
ctgatttccataatgaacggtgacggattgctgcttgcggcatcattttcaagtataatcgcttatttctgaaggaataaacaatacgcgaat  
tttctccacacgaaaccacaaaaatggagagattggaagaagttcagatgtctacgagtgctatttttcttttagagacacattagccttctg  
taagctcaataaggataaccgacagctctgtgaatatttggtagtaccatgataaaaagaatcagtaataataaaaggattttgttaaaat  
cacttagcttttttaacaatcaaacctttgtttgggtcaaatggaacacgtcgcgaaactgagtcagcgtcatttgtaccagtgcatctcgatccaat  
tgcccttttcaatattcttttagttgcttctcatcttctccgtaaaaaatggcttagtcaaactccattcaagcctatttcatcataaccttttgcaa  
agcaatccaagagagctgggaacaaactctgtggccgaccacgcttttctctgattacatactctgcttctgaacttttcaatgtggtcag  
ccatagttgctcctgccaattccatttgcattcatcaatgaaatcagctctggctcggtaacacgaaggcgaagtggaacgctatcgggtga  
tattgagtagcattaggtataaattcctcattgacttgataaacgggaagctgcttccagtcatttctgtaaggataaacatctagataattc  
cgctcgaggataactaatcccttttagaaaaagaactcatcgccatctgaaggtccacaatcgtttctgccaatagcatttctcagagcaacat  
gctagaaaacttctgtaataagttcgtaaaccttcaatggcttctgactagataaggcagaacgatgaacaagattgattggatggattggagg  
atgtgctcgcattatgttttccctcagaggagttcgataatttccgctaaagagctattttttagcaagatctgggtcgcgggcttcaact  
tttaactgtaacaaaaaaacttacccttgagcataagtccccagcttctactgggcccagtttgccaataattccctgcaaatccatgcctgctg  
tcaaatgatcagtttgcgtacgtggataggaacaaatccattcgtataaagactctcgcgaactatttcatgttaattctctgtatgatattcat  
ttactaaacatgttacctcaaggttttttagaagaaagacgaagatatttaggtccattttgtaagttcgcaggtcgatagcggaaatagggtt  
atatcgttttagcaggcttttatttactttgacaactttgcaatcttgcattcaaaacttttcaaaaaaagatagccccaatctgtcataaac  
acgatttctttccacgagaagttaacggtttgctgttctgctgactgttcaaggacaaaagttttaggaacaaaatccttactctttg  
ccatctatcgacaacaaagcccaacgtaggaaactgacacggctcatagctaataactttgttctgaagaacctgaaagcacgttgagttgta  
atgtttgtaagcgtgtaaaatagcggccagacgaaaaatcaagctcaattctgcccagacagcatctgcagcatcttgcagcgtctctaggtc  
tcttcgacgctgaatgatgtgtctaggagcgtgtaatcgcattctgtacggtaatacaaaaagtatcatacctttttcgaattgttaaagtc  
ggctcgaataacatgaatccttggattgctgatcttgaacggttgaatttccattcctatatgttcccttcccgatcacagctgtccagatata  
aaatatgttcattccttcttcttttatattatcagcaaggacattagcattctattcattgttagtcaatgaaattgaaacgagaggtaaaatg  
gcttactttagaacagggttacgattcgcgcacgaagagaatgtcctgaggtacagaactcgaactgttatactcagaaggaaaagaagcct  
ccgttaaattggcctgaaacggatgtcattgtaacttgtccgtaccaatatactcctcaagtcgaatgaaagtcataattcctaattgacttgcct  
ttcgtgtctctatatttagattgtcagtaatcgtttaaacagaagcacaacccgttcaacttgaccaccgctaaaaatgcttgcacttttag  
ctattgagttttttagcgcacataaaacgcgctttccggtttacaaaacatggatttcaatagaaaattgccttatgcttttatattgatga  
atttccgctataatgaaatataattaggttttggcaagtttacgaaagagtcatttgtttaggtggatgcaaaagacaaaacgcgagagc  
tatttaatgaatcctttcaactcaacaaaaagcagtaattgaaatcttcttaagttatacttttttatttaattggaagaaaatgttgag  
cgtcattttatttaggtttgttacgttagtagaaaagtcctgctaaagaaacagaaagagcagaggattgcttataaatgcgcaaatgatt  
ttataagaaggaaatcttcttctcgttaaagacgttctattttcttcttctttttattgttgactatgttactaaacattaaacattaa  
acattaaacaaatgagttttacctacacacacaaactcaggaactaggagctgaaactaccataaacacttatcctgaaatttttcttttt  
tttaccctttttgtttattctagagattttttccattgttcttttttttaagtagcagtagagaaaagccattttgatttttaacctttgaaagt  
aagtaacgatgcacctgttctgctaccctgaaaagtaggtagaatcaggtaaaactggaaacattaataaagcgtgtaattctattttct  
aataatattgaaaagttataaatatttctgttgaagtttttagtacgggtttgtcctttcgtttaaaggttctttttttagaagacaattttct

ttgcggcgatataactagttctctatttataaaaatcgaaaaaaaaaatttcagaatcgattcaatggattcctcagattcgataccagatacg  
agcgacattgacgcagacgtagccagtgaaattgttgatgaactcttgcttcagaaaacgtgttataagaatgtactttacttaccatctttata  
gttacagatgatattccaattgaaatctatcgttctgcggtacgttaggaaatgaagacaaatcaaaagtatgtctattgagatattgatt  
ccagtgagctgacgttcatactatagagggaaaattcaaatctaaacctcttgctacggaagtagtcaatgttccttacctgattacctgcctt  
aaaaagcaattcgcaaagtccttttacattcagatgagtatatgcaacaaccaatgctgaggccagaaaattatgcaaacgtaagcttttac  
agaaaaataaacctgtcatataataactaaagcctctaggtccatgctgcatatgaacgactaaacgataaaaattcgatatttgaaaaatgaa  
cggcctacatcctcatcctaagtgaagcatattacagacgaatttatgcatatataccaagaaataaattacatttacttatctttgtaaaattc  
cgatactcactattttaagacatatctagacaaatccattcatataccatagactaattttcaaacagatgaaaagacgctcaaccaaattta  
ctatccttgctacattgcgactacaatacaacaccttctgaatccataatcaaaccaatttcttttatatggaattaagtccactaaccca  
tgtacatcttaataggcaacagcagcttcttggtcagcaacaacctctggcggcagcagcagcagcctcagcaggttggtgatgacagtga  
aggcttagtgataggttctctccttgggacccaagacgacaacagcgtcaggaagagacttcttagtgcgggtcttgggttcaggcaacataat  
cttaacctgacacccaaaacacctgacgaagaagaacggaacgagtagcagcgtcaatgaagtcaacggcgggttgaccggagtgaatcat  
gaaacctcagcgaacttcatggacttagcacgagcagcagcaagcttaccagagatgacgacttcaaaccttagcaccagcctccataacg  
taacgaagaacacatagggcagcagcggcgaacagccaaaccagccaaaagcttgaacgaagggttcgacttagcagcagcagcagagacc  
acgattttgaaccttctcagatacaattcaacggttctcagcgaactgaagcgttttgaccaaaagcggtaagttcacggattctgcgtccc  
ttttctcaagaacatctgggtgtgagtgacggacgatgatctccgaacggcaggagtgacacggacttcacagccggagtagccctctc  
ggaaagctcacgagtgaagaactcgttcaactcggcgtagaaaacacatcagcgcgaactaatatggtagtgaactgatcaacctttataa  
aaaaagtgtaatcgaaatcatgaataaccaataaacaagaagcgaacaaactgaatgaaaactactgttctcattatttcttataag  
aacattcagattttgtccgttcggatcacttcaataaagcacaacaaagcattccaatcggagaagaggtgcagaattaggaatcatcatca  
tcacttctttgtttatttatttcttaacttcttaggtattacttcttcttcttggagatagtgatgcggcggcagacatggtaggggttgtg  
caaaatcacagtacaatgttctagttgatatcctttagcagtcacaagtgtaagtagggtagggtagtactgtctatacaaggtccaaactc  
aaatthaagcagcttatgacagtactataaatacgaataactacgtaaagtagatgacttgccttgagggataggataggatcggtattgag  
gtaaatttgaaagccttgaagttacataaagtaggtatgcttatcctgtgtataaacaataaataaaatgacaactcttatttattgattag  
aatagttcattaatttttcttaaaagaatttagctacgatttaagggagaatagcttactaaaaactgcaaacataagaaagtcaggacag  
ttttagaagaatttagattcattgagaccttgaaacgagaacaacatctattttttttcatggaagtacaaaacaaacttaagttgtc  
cagtagtttataatttcaatacaataaacaataatcttttaaagtctaaactagaacaaacactacaggattgtgtagtactttccgtc  
cttatttcttatttcttcatgttacgttgcctgtgtgcaaacgttggtgacttccaacagtagcaggggctcaggcattaaatgtcaagaagaatt  
aagcagttccagaaagcttctgcataaagcaattaaccaattttatatcaacgaaaatttagagcttaccgaagtaaaaccggttatcatcc  
aaagcaaaactagtttaattaagacatttaagaacatcaatgacattaagtggaaaaacattcccaaaaagaacacgagattgaactgaa  
agcaaaaagaattcactttggtacagaccgatcaaagcattaacaatacacatacaagcattactggcaaaactgtctcaaaaataaaga  
cataatccataaaagcaggtagaagagttaccgtagtagttcattaatgttgcttctcacatcagcgtttgatgcttcatatagcgttaggtga  
tggatgttctcaacacttgctgcgtgttcttaagcaggttagctgtttgtcctgtttgggaaattcagtcgtttgtgaacattctttgc  
ttttcatagagactggcgtcaaaaatcgcacgaactgcgtgatcattatcagtagcagcctcaacggaagactcgggctgctgtttatttgc  
cctccgagagtgattagaaattggctcagaaatactcccaaggtcgtgggggattcgcgggagatgtagaagcactaacggagaagcagg  
cgcggaactgcctgaattggcagtagtaattttggaccattgactctcgcctatgagtaattccttcaaacggttctgtagtactcctgca  
agtcattgctcatcaattttcttggatggctggggcatctgagaatagaccatattggttctcaaggtttctgtaaggggatcgtga  
tcataagaaccaactgaggccaatcatgggggtttggaacagccagcacttccagaaggggtcaggcgaagaagtggaaataagccgagtt  
gctgcaggagaagcagacgagcattctcgggtgagaaattgactgggatcaggagaataatcttgactagctattatcgacagtagcagc  
tctagttggagtctataagagccacttccctgtccttgactcagagggagtttctcagtcaggaggagaaccttcttttgggagtagaagga  
gactgattgcgaactgggtaggtataggaggggaagtagctcagggctgagtggttctcttcaaggtgaaaggaggtgtgcaagaaatg  
gaggaggtgtttttgtaaggtgtcttcttagttttgcgataaaactctcccgaattcaggctctattgaccatttctccttgcctgttaccg  
gacttccgaggcaccttcaaaaagcttggtaaaagacaagttgtgtcgaatggaattctgcatccgctttttgtggttcggaataaggataatg  
agttgaaatccagttgaaatattgaaagtgtcatcatgcaatcgggagaggaaagaatggcttagcaatcattacagaataactatagggga  
ggttttctattgcataaacgctattttcaacggtagctgaaaattctcagctttcagcttcttctcagctcgcagcttctcctcaggaatat  
tctgttcagaggcattcggcaaaaacaacatcattgagtcagcaacgtcgagaattgatctaattatgttagcactatatacaattttctcataa  
aactgctttatttctgggataacagcgtcagaggaacactggggaaagcggggtcaaatcccaagcaaatgaagcttatttacagcacta  
gcatattgagtttgaaaacgcttcaagatcacttcaaacactaccttattgattacttttctcccatgaaatcataaacccaacttctct  
tttccgctgttgcaaaataaacaagcttaacaattattacgtaccactagaaagtttcacagctctcctcgttggtaagctttccatccact

taacgccgtttcttccgtgaaccgtacagttccatgcctggcttgcataattgtattcaacaacggcatgcttgcgactgacaaccttgaaggtcca  
aagttcatgtccactacctcgctatcctcttcttcccttccgagattggttccgggtcacgtccaaggataagtcgaatcttcttgacataatac  
gtccacgtgctaccagcgaatttagcatagcctgtatctccagagtgcttccggcgtcttttggttgaataatcctccactatcctcatttctg  
gagatggaacagtcgaatttgcgaattcgatcaagacgtccattcgattgaatgtccgcttccgggctctgttttcccttggttttcaatcccatt  
cttcttggtttctcatttccagagtaactccctgtatcatttctagcttatgagaggacatttctaacgatacagcaattgtgctgttgggtgatgt  
tattacacttggttgttgcacaattcgtttatccgctggcagtcggttcaaagtaaacagagactatcgcttaattctatacataatac  
taattaataatTTTTTgagtatacctgtaatttgcattggcgaatttctcggaaaaattcgctgccattaatattgagcttctcctaaagcaagg  
tccaaatgcgctatatgaaccaaccttccgtgaaccgaacaatgaagaattcagtcggttcttctgatattactggttcgggaatatagtat  
taaaaaataaatttctgcttcaatgttattctatcaaggaaaaatcttcttctgcttactctgtgttttttaattgattcaaatattcg  
ctttaaacagatttaccggccaacataaaatgaaattgatgtcaatggatataatttctatgtaagcatggaactatggcttctcctaaattccct  
tctctttaaacaaccagtcatttattatatacattgtaggctctctgcaatgttatgttacgttaaataactacacaaaacggaggctggatg  
agcgttctaataacgaattaatgcgatatcatcttctcgttagacagtcgttatagtagagaggtgctattgcgcaaggaggtaaatct  
attttaaacgactgtttaaattattccattgcctattactgccagattcgtcaactagcgaacaaagaatctgtcttaattcgaccactgag  
cgtaataaaaaggcgtcttctgttataatccgttaaacgagaagataccttaataaagaagtcctcgcaatctgttagcattattagcctctgat  
tttcaagtggttccaatcacgtgtagaaatatttttccacctgcaataagccttgataccctcgaatttaattcaattgatgtcttctggt  
gatgctcctgaagacagcgtctctagagcttgcgatgaatgccaccgaagaaagataaaatgcgatcaacaaaaggtaaggagtcgatgat  
cctacatagtaagggttgatacattttagttaaagatcgcaacaaactcggttctttatagaagggtgagttactcaattcccatgatttt  
ctagacaaaaattattctgaaacttttaggtcaattatgtaacaatatttttctattagccttctcaaatgttaggacatacaactatggatg  
ctgaattatctttagacatcagtcctattgaccttataaacagaatgtacgtatggccagccttttaacgtctgttgcattctcccgaaaaatac  
attcaatttttagaatttgcactcaaatatctaaaaaaatggctgaagaggtcattccagatgttaaacttcaaaacttcttaacatcccgaatg  
aaaacttgcattatgacgtgaaagtgttctcgagaaagggttctctatgaagagtccttctgacgatgaaattgacagatttttctgatcg  
atatggtcagttaagtctaagggataacggaaacgcagactaccgaggcagttcttctggatagtccttatgcaaaatattcacaagaatctgc  
tcggggttctctgctactaaccagaatcaaaccaagcaagtcctcgtggatccttctgactcccttattctctcaacaccagctggagat  
gacagaaaggactttatcccgcagattcaatttcttctgatgaggaagcccgttctgttacaggaatttcttcaaatgatcatttttgggtcat  
cttcatcatattctacttttatgaaaggctgcagctatactaccacgagaaagaaggatcctactttcatttctgttggcggctactttatgc  
cttggttatacatatcttctcaactactggcttccgtttatccttatcaaaagcatacgggtattattattacatacgtgctgcatttatttga  
agaaagctacgatattgaagtcattcagatccttcttattgcgttctgcttctttagttcaaggcttcaagcctacagcttattgaatatt  
gcatttttgggtcatgaaacttggcttctatcgagactttctgacgttcttacgtctccggaacgaggttgcggaagcgtgttttattctgtg  
atgtaattctctgctatacaattacaattatcggacttcttcaatattgaagatgatgaaattgatcaaggattgccgaattctctacgacttggtt  
tagataacgaagccatccctgcaacgtagtagcatctgaatcggaagcttggaaagtattcaatcagcatatagcttcttagaatttaagcc  
atttgttcgaaaagtattaccataaagtcaagcaatgggtctagctgctgttcccttactgcagttagagaacacgaaaacaggctgacaa  
gttgggtgaaaaactggcaagatattgaaggtgacgaagtctgagtttctcctaagtgattcaagctataagttggagctaaaattcg  
acaaattgagcttattttataggccttctccacaatattacggatccctggaggagcctaattgaaaccaacgaagccttcaactttgctt  
tgaaatgtgtcagtcagctgaacgtatttggaactattgagaaaacttcaagatcgcaaaatgccaagatgtttttatctctatgagg  
ctactatgctttaaacttgggtgattctgcgagtttaactaaggaagatacaacaagatccaacgatttattgaaggccctggaaggatac  
tccatattggctggaattaccaaggatcagctatttttctacaatttagatgcaattaagaatagctgcttgcgatgatgaattccctcga  
acggattatcctaaccatccgtctcaaatccatactccaacactgcaaaaaggcagtagacagatgttctcaggacatgcaggcgcctataccc  
ttgaaactttctcaagatggagcgaatattccatttctggcttattcctttataaatggcgaacatatttctatccttctcaagttatccacag  
atggaggagcaccttctcactcaagtaattatcatatgctgcagcaaacagggtattaccctcctaattggctatcataatgataaaggctatg  
gtccatctctctataatcggagccatattcagcaccttatactgggaatacgttgcgaccgcctatccacaatctctgtgatccgttctca  
tccgcatattattcgcaacctggccatctgatcattaagctcaaatgctatgtctctgataatgcacataaaattatggaataccagtg  
acgaatgtctagtgacctgtcctccgatagatataccctcatttgcattctggaactggaatcgatcaatctgctaaaaggcttctcagattatcc  
aacatgacgggaacaaacgttaaaatatttgcctatttagatgttcttctctgtaactattgacatactacataacttatcttagtttctct  
catatattggcattgaatattgtttgcatcatttcttacagccaggaatagacgcttaccgtattgatcttggagctctcatatttataaaacaca  
attattggaacaatacccatcatctcatgattcctaaaaataaccatttgcatttattacagaaaatcaaagtcagggaaatggtttattacaaa  
attattgagaaaaacgtaataagaaatcggttttcttccctatcacctattgccttaaaaatagtttagcttttttctgttttctgtttt  
ttgttttctgtctgttttttttttttttttttttttttttttttttttttttttttttttttttttttttttttttttttttttttttttt  
aagatcgagtatacgaattatgggctgactttttagaactcaaaccaattgactataaatgcatatttagtaagcatcgggttaaagcaaacgaaa

ttatgaacaagaaagcaggaactcaagaaggaaccaaagaattgaatacagagttttcggaccactggtgccttagccgtatcttactta  
caacagtggactatttggactttatgttggcaatgaaaatgggtgccagcatatcctcagaagatactgtctatgattatgatgctaagtta  
ttgatgtgattcgttcagctgtactgtgtggctagggcacttatcctggcgtggcatgtcttccaggagaatgggtgaaaggtacacctatt  
gatgaaaaaggaagtcgtctcgattacaaaatgaacggatttgcactgctagtctagtttgggagtcactagtggtttatattatgaaagga  
cctgaatgcatggagctgatttggagtcgattttacctctgatgacatcgcctatatacgtttccatttcttctatatactgttacatttctagtttc  
atcggcaaaagcgttggccgaaggtgaaatcgggaaatatagtgtatgactggttattgggagattgctaaatcctcggattggaaat  
gatataaagggttttctgaactgagaccgggttaatttgggttcttttagacattgcatgaggcagtagcttctgctgaatggaag  
aatcaccgatagcatggttctggattagtttccattctgtgtacgttctagattctctttatgaaaatgctgttctgactactatggatgtaacc  
actgatggtttgggttatatgctttaggtaacttggcttgggtgccttttacttatggcctcaagccgttacttatctttatccagtggaacct  
tggaaatcctgtacaattgccatcatcttctcaatgctaggttattacatttccgaggaaccaacagcctcaaaagaatggtccgtaataacc  
ctaccgaccaagcgtcaaaaactaaagtataggaaaccaaactgggaccaagctgcttattgatggatggtatgaaaatcccgcatac  
aattttcggcgattggtgatggcctgggcttgggttaccagtaggattggatccgctattccttactttcgttcttactttcgggtgctatt  
aatacacaggtatggaagagatgataagtgccatcagaaataggagaggattggaataaatgccaatagcaagatcgcattatc  
ccctacgtctataaaccgttcaatctataactaataaatttctgaaaagaatgtgcaagatatataatagcaggaagaaggtatt  
gcagagaatgaagcaaatgaaatctatacagatagaacaattacaaaacagaaaagaataaagtgacaaaaagtagcaaaaagctt  
gttctttggaagaaaaaggaacttttattgggcaagtttctgatattgaaagatttagggaatgcagatcctttgttaccatttccactgctgtg  
gatctgtagatcctcactatataatttccctcttctgtacttaccctttttgtaccttaccataagttgagagctatagaacaccttagaa  
atthaaaagattcaataaacgatcactagtttcttctttttgtttataaatacttctcgttgcattgagattgcaatcaaacctg  
tgaaaaaataattactgaaaacttatttcaatcacagaataagattcttaaggttgttgccttgaactactaagagagcgtctgaaatc  
ggaattgtgtaactgttctgaagaattcatctattgattaaactaaacgggttgccttccacattaattgttgatctcaaacgtgtt  
aagcagatctaaactgaaaacgctaaaatttctacgaattggttccggcctagtgattacctttcatattccatccattactgactggaag  
aaagaaataacagcaggcaaaaacgaacactgagaaaatcagctattgaaaattaaagaagatcgaacgtttttcattcaggaatcaa  
cacttaaaacttacttatttcaatatacaagtaaccccaaaagtgctaaacccttattctctttgttcaacttgaatctcggccccgaacttct  
tcatccattttgtccatataattttactattggcctaaagcttctatactagcggggcagattgatcttaccattacatagtaagacaagggaggt  
ttctgccgaagccgaaccgttactgttgatataatataatgggaattggatttgccttctgcataatcattggaatttcttttttaggggt  
ttaattacctaaggaaccgagcttgggtgagatctgaatattgccttctgtttacgaatataatagaacagcagccttgaacaacaaaa  
cagaaggcaattgttattatccttggttttttgttttttgcgcctattgaatacggatttaagctacaaattattatctactggatcgtggaatt  
ttcggccatttattcactacgtatatacatagattggaagggagttattaccattttccatccgctatcgttcttcttttttattaattcttatt  
atthaaactgtttttcaaaaactgacgcctcaaaaaaatattgcgcttaattctcaattgtgattttacgcttcttcttcaatccccgca  
ttttctcaaatatttattgaaatacattcgttgattttaaactatataaataatataaccgatagaacaaaatcaagctgagatgtcgaaggt  
gaagatctgatttctggcgaagatggtcagaaatcgtcttttcaaaagcaatttggcgttctgctcctgaccactggtggcataa  
gtcgtatgcttggcaagccacagcaatgttgccatagacctcaagaatacagacaaaagagttgcgaaagtagcgaatctacgc  
tctcatcgaattgagacatttcaatgaaggaagagaggaataacccaattccattacggaacgagataatttagcggccgaagggg  
aaggttctttagattcaacgaaggttcttctgaattgtcgaaggaataatcgtctacagttgtgatactttatgtactactatttccaac  
catacttctacgcatggctgttaccattcgacaattaatgttgatgttgagcgaacataaccgatgtttaaagtactaagtcgacacaaca  
cgaagggctttaaacaaggcgtcgaatctcaaaaggggtcatgtttgacaaagttggttggggcgttggattctcgggaagcgcagtttct  
acatccattgagagaccttctcctcggcggcccaatgttagctttttgagaaggatcaagaagagatgtcagcattccacaacatccaccaa  
atcgccttccataacaaaggatagaaaaatcagaatcgaccttgcacaaagaagaagtgcaagaaggaagatgatggaatag  
atacagatatggatgtccggtcaagcaaaactattcagattctagaagcagatggttaccataaaaagtcgaacaaggaggaacagagtc  
ttcgtatcagacaccttttctagttttttgcatcattagaggaaactcctggaagctacacggcgttgggtggtctggtgagtcctcagagac  
aaacgccttcttatttgggacaataccatgataatgggtatattgaagaagaagatgaagatgatgacgaaaacgactttatgaagac  
gacaatgaagatgattcggtaatgccacctttgtcttgatgaagatcaagttctggatggtggtggagaaagtagacagcaagaagattggcg  
tggcattggaacggaagcactttacggaaaggaatcggtaccgttgcgccgtttcaaaagggatgttacgaaaagatcaaatggcagca  
gaagcgtattgatgcttcatgggtctttaaattgatattgaatggaattgacagaattactgtacataaaaagcttgttgatgatgattat  
actaatgatagtaaatgaaattgatgataaaaaaaaagaatgatgaatagcatgaccgaaatgtagttcatgatgaaacagcaaatcagtt  
gattttcgaagaatgggagaaagaacagtagatgttgaagaaggtatctgtcaagagagagttttacattatgtaaagatcacgggagtaag  
aacaactactggattggaagacattccagcatagaatagagcaattaagagggtggttttaacattgtaacaaacatgttcggttgggtgac  
ctagacgatgatgtagtaggttaagcttttttaagcgaagttcgttaaaaaagcttcaaaagggaaaaacgaaaagtagaaaaataa

aagtctagtaatttgctttttttgtattttacaagatttagccatctgctgtttactttgctgtggaagaagacagtctaactctctctctctct  
ctctctctctctctcattagaagaaaaagaattccagcaagaatatagaaccattacaatcttttctaactaaaaagaattatacatgacact  
tgaatgctttgtcaaaatgaattcattttattgtttgttactgtcattcatttggatgtgttttttttattacttctctttttgttacatcctcgtg  
ctatctatcccaatggctcgtacttctatctcggcgtttatctttttccgggagatagcgtcactgacacttctatcaaaagttggctgactgg  
tcgaggcggattctttgagtataaataaacgaagaaccaacacaggtttctcttttttagttgtttttgttcttcttctcctcctcctcct  
ctccatattctctatattcgtggttctgtttattcttttgcagcctttcttttagtgtttcgtgtttgtgctccgtatttctattgccacttacatagc  
ttttgccttggctcatatttaccggttcttataacgagaaaggtaattttgacatcattaacgttttttaacgagatcgttatccgatactttagcttagt  
aggatatagttgaattttgattcttctcacttacctatttctcagtaacgtggtatatacgaaaaattgctgtttagtcagtcagttatttctcgt  
ttatagcaatataaaggctataataaaggttattaacggccattttgatccatattttgttcatttctgtttttcacattttggtttcaacacctga  
aaattccctttttttgccctccagcttggttgttttctcatgtttaaactaattgatcttattgaaattcttttcttctcgttcttcttacttcaact  
gcaggttggattacctgacttcttatttaagatttccattacaaaactaaattaatttacttttctgcaaaaaggcgtctttattttgtcca  
ccagtttacctggattaatagactcggactgattattcttctcgtatccgttttattttgtgtttttgtttattgttaaaaaatggacccaaattcc  
tcttcatgagcatgggatctcttattccccctctgattccattcaactcagcagcagacatcttttccaaaggaagatgacaaaaccaacgact  
ttacaaaaaaaccgctcagattttgattttgattcacgaacctctacgataaaggtagtgcgagcttacagaaaagagttcttttggtagccg  
agtttttagacttttccgctctataaactgctcctgataatgataatacagacgtcaaaaatagtgaaagcttttgaagcctcgtcacctaca  
atgattgccatcggtgtttgtattggtactgttctttatgtcgccgtcggaatctctcaaaaactctggtccaggtagttatgattaattttatc  
tcttacttccatgattcttccgttaattatagccttggcgagcttctgtgtgtttcctaaccaactagttatgcatgtatccgggtcgtttctgt  
agtgaaaaccttggttcgtgcatcctggctgacttcttctttggcttactacattacctagtgaaatttctgctgactgaggtcgtttgtttt  
gaaaagttagccttcttaaggctctatctattattttttcttggttccatcatcattaactgtggtgctgctccaaaggtagctatctcgtt  
gcaaatattggcatgatcctggagccttataaaatgggtttaaaggttttgctctgcttcttctgcttccgttattcccttatgggtaccgaaaac  
gttggtagcctgcccgaacactactaaccctcaaaaggctattcctgcccgtgtcaaaaaggtttttaccgggtacttttcttactctatcac  
catttcttattaccttagttgtccttacaacgatcccgaattagggaatgtgagtcctttcattattgccatccagaacagtggtataaaagtgc  
ttcctgatactttaacgctattatcttagttttagttttagttttagttttagttttagttttagttttagttttagttttagttttagttttag  
ggatgggacactcgtttattggccgagttgatcaaaagggtcgtcctgtcattagttattgttttcttcttgccttgccttgcctgctgagttatgtggcg  
ccgctcctaaggagggggttattttgactggttgcggctgtatctggtgggtggtcattctcgtttggggattgacattctatcgcatattcgct  
taggcatgctatgaaagctcaaatgttctgacactatattgcctatcagtttaaaggcagtcctatagattacgggcttttaattaatt  
tttagcattgtgactttgggtatatttccattttcccccttccataaccctcctaagctttagacttctttgtgcttttctgggtcctgcgttctc  
attgttttctaatcatcagtcctttgtttgttggattcaaatatactctttaaagatatcgatctagttactggcgttatgatatagtgggtatga  
agagcttagagcggattctaataatgctgagattgagcaaaaagataagatagcaatgtcgtttttaggctcagaattcggatcctgagaag  
ttgctggagcgttcagaatagctcctccgaagagaggcatttcaaccgcatcataacattatgtgttgattgattagacatgcaatggctggc  
accattgaaaacttctatgacgactcctcaatgagatatgtgtcctttccgttagaaaatgttggtttctgtatttttccatcatggaagtgt  
tttttttagaaaaaagttttgccgaagaaactctttttttgtccaacatcggtgttttgggtgataaaagaatcctgaattggatggattcc  
cctaaggattgaaagacagagaaagctaagaagctaaaggctttttgtctcaataagctgtgcttgcattgattttgtcgtattattgtttc  
tgtatctcctaataattttgaattgttccaaccttcttattgttttgaagggtcgaataccaaaagaaaatgattcttgatgtgtgatcatcgtt  
ctgctttatctgtttctcggcagtagccatagaagaaaaactaatgaataaaagatgctgttctgattgtacaagttgtcttttctatcgata  
tgttcatctgtccaatcaaaaagttctgtcaaatgaagacgaagctgactgatgaattgtcaaaaataggattccttctacgtttatttcttc  
ccttgattcgtttgttttaaaagcagagcagagtcactgacttcttctccagcaggcctgactttgattattgtattgctctgtttttat  
agtatcttccggcaaatccttgaaggtccacgtttatgggcaaccaactttctgtgctgttattatttcatgttttccactgttttgtgtca  
tccttcttcttttataatagcttctgattgttagtctgataaataatgaattgcttctcattgattgatacagcatatacgtctatttataattttat  
tatctggtgagcatagagcatcgcatcattgataaagccttctataatattatctattttaaatttctaataccagaacctttattgctggaaatcca  
tgcgagctcctcaaaagtacataggatcgttgacgaaataggaagatagcaactgtagacgaacagtccttaataaataaacagataaacagat  
taaatagaaaaagcaaacgtaggggtagcagcatcagtaggcaaaaagaaaaaataacgaaaatcaacgggttaggagttgtttgtt  
gctcttgatcttgaatataaggaagaaatgatgggaaatagtcaacaaaaggaaaccactgaaatataaggcaacaaaataggaatggctt  
tgagcgaatttaaaagaaaaccgaatcgaattgcttgataaaataggtgagattctgggtgggtttcaacaatcttctgctcagtcag  
tccgtcaccaccttgggtgattatcgggtgctgttaaaagttgtgtgcaggcgaaggacagaaaggaagagaaatataaaaacgagctgtttc  
cgaattgtataaagcataaaaaactcaaatgagttggaagagataaaacaagatgacatagttaatcgacacattcgtagcttctgtaagtt  
ctccgactccgggtgcttcttcaaacagctggaggagatgtattgcaagctccgattgctttgagcagcagcttgcgtgtttgatggcctcgaatt

tgattctttgaatgttttcataaacgtatcttctctctctgcttcttcttgaagaacctcatcgtggatattcaaaggggtgtttgttc  
atggaagatgaacgtaattgcttagcagctggttcatccaaggtatcttcatcccttctcttccattgagatccgcagaacttctttttattag  
cagcagcagcagccaagctagatcgagtcattttctcgcctatgccaccagccttaagggcagatttggaggaggcggacgaggaagg  
aagctttgtagtattcagaatgtatgttgggagttcaaaatctattgatgttctcttgaatgttcttttctctatcgcgcttacgcgtttacca  
cagatggtgaaggaaaggcttctaattgagaagatgtttagcgacattgtttagttcttattttcataccaatcgttcaaattcctgtaagt  
tgtaaagtgtttctaattttccaacgtcttgacacgcttggatgttggatccttcatgaatcattcgaacattccaatcatatgaaagt  
gttttcagttcctagagagagctgtagaacaaccttgattcctggaacgacctttctatcattcatcggacgtttgtctttgttggccgata  
caggcaaaaacgtcttctttaaactcatttacaaggcattctgtgcatgacaacaatctcttctacattggctcgcaagccttggcaaat  
tgccttagcagcaaaagttcttcaggattgaccattcatccgaagaaaacgacgtttctttcttcttctctttagatgtggatccgaaga  
agcctgggttccatactgctcatttccaaagcttcttggcaattccaactattcctgttctaactcaacgtcttgagccaagaatcgctcaaaa  
aatgtaatctctctgtagcagatgtatctgattgaaaggaaaaaataaagtaaaaccagaaaagatgaaaatactcgcacaacttttggaa  
ggatgttcagtagtaccatcaacaaggccaagcttccctcagaccaacgcgttccaccctcttactactattccttcttatagaaaaaga  
tcaacttgacagagggtaaaaactgttgggtgaccatttcaaacagtttcttctgtttctttaggcaggaccttgcctatcctggagcaaaa  
agcccaaaaagaggataccaacaaagcaaacacttacaacatgttggaaaagatactggaaaagaattgaaatggatttctggctcgaagt  
tttttaatttttctaattttgttaatgctatgttgtttacagtttaacaatgtttcaaagcagttatagcattttgcgttccgttaaattgtt  
agtgcattgcataactgcgtaaataggatttctaagaagatggaacaaacacagattggaacatcattcggtttccatttattccagtga  
aggcaactgaatgcagcatagtaactgattttgttaccattgtgaacgaacgtccttattctggagacaaagttttgttattcattagaagatt  
gattgaaccttgcatacaggttcaaaaaagttggcaaaaaagcaaaaaataagcatttttgggtgttgggtgtacstagcttcacga  
ctttctacggcttggctcatttgccttctgattgatttcaaaaggagcagcttggaaagctggagattcatttgagaatctgcttctggcaa  
cgttggtaaaagcttctgctgtcacaccttccattctcaggaatattgttgaatggatagatgttccgttgactggttgggctcctg  
ttaggtgtcccgatgacatgataaaaatccattttgtttatgttctctatccgcttccaggcacttcaaacggttgcctcaatctcttctcc  
gaaatacattttgatttctcgtcggcttttacttaatccccgttcatcctaactggtggtacttatactcttatttgatgctttgttacttact  
tactgctacattggctcagcacttctgatatgccatggatggtttttgttgaatcctcagccatacattctacaggtactgtcttcttacttctgtt  
ctgtagaggctaactaacctataaatagtcattgttgcggtacttctcctcaggtggttagcgacattactgcatccaaatggtgctttgat  
gaagtaaccgcttgcaggtctgtgcacgatggtcgtcaacctgaaaatgatggaagcatgaaaaatctatttttatttttttcaattgt  
ggaacaagggatgtaacttttttaggtttgtcggattaccaaaagcaacgtcttaacaaaaatgcctagcttttttcttcttggttatgtg  
ttttcttctctcttcttgggtggcggctttgattatgttgattatgagcattttcaccttgagcatgtttgatcgtcccaagatccattagaa  
caacaaatactccccacagctaaagccgctcgtggctgctgctggctgtctttggctcctggatttcttttggtagcttttatttctc  
ttagtttcttttagacccaatttgcctccttcttctgctgaaaaagtcaggttatgttatactcaaggctttatcgtctgatgaaatattcgg  
gcttgggaattgtctgatggtgcatgctcctcctgggacggttacaatggcgtagacgaattaaagcgtccaggtgggatcgctcaaaaat  
atcgacccattggatttgaattgctagcaatatcaaggggcttggaaagcctggaataagaatacaacaaatggcttgcgaattatgtctac  
ttgcgagttccaagaaaggaaagcgcctggattcaagagtacattaagcacctttacagttagcgcctctggcatggcgtctctctggttatt  
acacgactttgttctgctgcttcaactattgccaagatcatcgaagatacattcgtcccttttcttcaacaagacatgaaaacgccta  
attcattcaaaaaagctacgatttctcgtggttagtcgcaacaaatataccagtttcttattgatcatttcttctttaaactgagcgttct  
cattatgttggagcaaaactacgctttttgatccatataatattgtattgtctatggtgttttccatagccccgcaaggcgaatatacaaga  
aattaagaagcggacagaaaaagcagatttgacaagtagatgcaaaaacgaatttctccgatacggatattgaaatattcattcctgatg  
cagagagtttctcattccacatttactactaagtaatgcttattacattgttacaagaaaaatgaaggcatggcatgactccatgagacgctc  
gcttctgatgaaaaatcctcgaattccagcgtggattcgttcttcttaagaaaaatgaaagtaatgtgtttacgattgacataaaaatgat  
gacttaataactcattcatgaatctatgatgacttggtaaaagtaaaatgagttgtaagtccatcagaagactaagtaaatgaaaaatagt  
ttacatttttaatatgaaaccacttggtttagtcttttcttcaaaattcagatggtattcgggtggcctatcctattcccaccactgttcttcaat  
gaaaattgttctagattcaggaacattatactcgttttctatctgcttctaaagctagtaaaagtaatgaactgaatgaaagtaggaaaagc  
aagtttgttggagagattggagtagtgataaacctgctcgaagttgccattgagggtagtagctcatatcgatcaggatgcatttatg  
ctcaagtggaattgtgagattaggaattagccatctactccttctgcttcaacaatggcaaggccttattgctgcaattatccagctcgtgca  
gcaaatgtctcaagacatgaaaccatcacagaagcaagaaaaagtgctcctgaactcaagttgacacgtgaaaacttggaaaggcggcgat  
acagaagccaagatcacgaaaatccggatccgagtaactttaaaggcttcttagatccatatagacatgaaagtgcaaaattttaacatcat  
aaaaaagcatcacctatcgtgaagaaggctagattgatgaatgtttattgaaactcagcgtgaaagtgaaaagactttttggaggactacc  
tttttaagacatgccgaaaaacttggaaacacccttccagctgctcgggtgctcctgtggactcaggattatgattgttattgatagacga  
gaaggtgataactaatggagaatgaacaggactgggatgatgtcttcttattatgacgcgaatagtgaagaaatccgggacgatatta



caaatcgctacattatacatgttctgctggcgtctcatttaaatccaatgcttgcaaagctcgttagttctgaaacaaacccaataaacaagcagtt  
ttatgtcgcagtggtataaaggattatcttggatcgtgagcataactgatataagaatgttggcggttaaattggcgaagaagtggttcggata  
cttgggacagactctatttctgatgtatggtctatgcagcttgatgatattatgggtaagcttggacaggtgaacggtaggcttgtgtggaacatgt  
gtcatggccttgatgatacagaattacaacccaaatacaataaaatctatgctttctgaaaaaattcagtcacaataaactgaaggatgaa  
aatgcagtactaattggttctgtgtttggctccgatttaccattctaggttttggaaattagaaggtcttgaagacctgaactttgtgtctcatg  
ctctactggctttctgtaaatcacgttcaaccagatcccttggatgccgatattactgtggattatattgcaaatcactgccttaagcttctcg  
gcaactcaagatgagtagatgtatatccaatctcccctcatcagtgagtttccagaacatagtagaaaatgataagagctcgaggggtatag  
aatctttttacgtcctagcaacaaagtcaactcaaacggatccctatgtagatgacagctcgaagattcatctggatgcaaacagtcacacctcc  
ttcgcaatgtctaactgaagaatgccagaagaagatctcctaataaggaaaggagcgttttggaaatgttaaggatatttcggaaaattcaa  
gttctgttgcgcaaaagtcatacgtgtaagaatgtggacataatattcttttctcagaagagagcatgatgactatcactttgctattaat  
ctatcacgcaatgaaagattattcgaacgacagacatcttctgctggtgcagacaagccggcaaatctgcaaaaagcaggacatattggcggaa  
aaactggtaataaacattttattgctgctatggatagtcctatcgcaaaaaagccttcttctgatgcttttttactgcaacccaaaacacgccatc  
tacattgctgtaaaaagaccagtcaccaataactcttcaaattctcgagtgctactcaattgcatttggacctggggtcaactactgtcacatgttca  
gaatgtctcatggagtacaataaagcaactgaagaagatgtggatttgcattcgcgttttcttctgctacactaggtggtattgatctaaatagc  
aagcagagccgattaagagacttagctactctgtaaatggtgactcaatctacatggttactgccgaaagtgcattgttggaccagaagaaagct  
gaggacgcagtaaaccttgttaatgaagaacttccgggtgaacccatggaaactatcggaattgataaataattccattttctattatgtctggga  
aaaaatgtatcgggcttttattagctgagcgtataaagtcggcatatgtgatcagtgaaaaagaagatgaaaaaacttttctcatccgctgtgta  
catcaaagagaacaaatataaacatggatttattctcgagatcaaggatttgggttactccatcacgtcggaaacaaggaattgctcgcgcac  
tgttagattgctgcgacatctattttattatggatataagatttccaacaaggaaattgcctttactcaaccaagtgaagtggaanaacggttcat  
tatatcctggagtcgagctcaacaagaataaaacaggtgtacaatatgctgtttacgaaagctaataatagaagatatttgcgcaagattt  
atggattatagtgattgtttgtaataaataatcataataacttaaatagcaccattgagtagtcaagtggtttaatcagccagtcctt  
gagaaccttggaaataactgttcttcaaatacttgcacaaaggaagccaagtctcataatgctcaatctaaagttgttagttcatgtatgac  
attaatggtcatatagcacaactctatttctgtgctgaggtggttaaggcagattgcatatattccatattaagaagatatttctctcccatag  
taataaaatagggcatttgatattgcttgcgggaataaaggcacttgataatggcgtgaagtaagccagtaatgagtgcaaatcatcatcgt  
ataactgaaatgtcaatttctgataatctgaagccagtgaaacacaactttgacactagagaagaatataaatgagcgttaaccacatagtttt  
ggtttggtagatattcttaagtcacagtgaaagtaattgagaagaagtcacaaattttacaagaataggaggatctgcatagtgtaga  
aatagagatacaaaaaagaagaatccacatacaacaatatttgcacaaaagccacagaaggtaaaagacatcgcatgcaaatagatt  
atacattatttttgatttgccttaactagatagcaaccagatgattcgaataatcccttggagtgaaaggcaggagctagggcgatgaagatttg  
actttgctgttagggaattgtttataactaatgaagcaaatgcttgagcggcttctgagagaatccaatataagtaagttccttctcagctca  
tgaagtataatgctactgtattggaatgtcaaacatggcctatgcatctaggagaaatccagaattcttctgcttctggtttgtacacaacat  
gttctctgctatactgttctctattattgccaagctaaaggatgttagtaaaatcagtcgtttcaaatataagattgcttcttctgatgaaag  
gaggtatattctgactgaaaatccttctcactttgcaaatagcttaccacacatcatagccattgtcgaccatacaaaaaggagatttgc  
ttctggtcgttgactgccaccaaagctcagagttcgtcatgagccatgatgacagtaaacactcctcgttttctggttttggaaaggatg  
tgatttctgtgcagacaaaggacaaaatattctcgggtgctgaagagggtcctcggctttagccaaaagcctcacaatttctgatatattc  
tgcattttgaaactgcatcagtcattcctcagttgtttgtactaataataatggtaaacgaataacccttttctgcccattctgaattg  
atctgggatcaagtaataaacacgaataatcaattcggcgtaaacccgatatacgcagcgaatagaccaaggaatcaatcctaaggaaat  
aaatgagcaactgggtcaaatcgaatatgttctgagcttaccagggatccgttctatacattcctaccattcagaatattaattaatagg  
taattgctcagatcgacaaattggaaagcacaactttatattaaccagcctcaatattttaaatcaagaatcggcttgttcgacacaattt  
gtttcattgctgtggtgctacagtaagtgatattgctgaaatcgccagaagagctggaagcgttccagccttatgaacgtgtattttggaata  
tatattgctgaaaaaggaataaaaccattttcattataatattatatttctgcttctaccgttactgtacgaggaataactacttcaagaga  
aaagacctatgcatggatgaggtttatcaccgcagcttttataatgcatcttataataataccaactggttaagttcctatttaaaacaagg  
acccataaacatcttgaagggttacgtttgatggtcaacaatctatgaattcagcttccgatggcctccgatagcttggactcgtataactc  
gtataaatacttttttaatttctatttactatggttgtttgttacgcattgtgtctgatataccggctcgtgtattgtttacagttgcaaaaat  
aggcatataagggcgtcggtaggaataatcttaccggctcactcactgcaaaagatgaagttgcattaaagaatggattgtcaatcgg  
actcatgctgggtgtgttccccggtctagcactaggtgctgaagactggaaaaagcaatcatttactgttttactgatcattgacca  
agcaactggttctcactgcaacattcatttggaaaagcattgtggaggagactggcgtggaatagcagatcatcttactatattcaggagctg  
ggcttcacagcaatttggatttctctgctgttcaacaggtcgagattcctgagaatcagggcttggtagacttccatggatattggccaaaa  
actactatcgttcaatcctcatttccggtactgagaagaattgagagagctttccatgcactccatgctggtgcatcattgatggttgatga

gtaattaatcacatgggtcctcaatggacgaatgaaacagactactcgaataactatcctttcgacgaagcaaagtattaccacgagccctgcc  
cgttattgatgatgaaaaggtaagttagcagaagtgcacgacccccgcaaaaattccagcttgacctgacattaatcaggacttgattcggtcaa  
ggaaacactaaaagaatacatccattcattcgtaaaagccttaaggtagatggaattcgattgattcagcaaaacatctccaaggaattgt  
gtcagaatggtgcaaggctgctggagctctttgatgactgaattgtggtcttataatccagttgaaattgagattggcaaaaactcaattgaaggat  
taatgaatggtccagccgaggatgagccagaagagcttcttttagcaatcctgatggaatcgtcgattggctgatgtgatgactgacatacg  
tggactttgctgacccttaactttgggaaattttgtgaaagccatgacttatcaaggatggcaccgctaccagtgatccccgctctcaaga  
acgcatcgctttgttcttatgggtgacggaattctattatgtattatggtcaagaactgctttgagaggtagtgtgagccttataatcgcccag  
cttttgggagaaaggctccctaggagaaatcctattattactttacctggtaatacaaaactccgcaatgctatgatcaacagtgaagatgg  
agacgctttcttaagctctcagtcgatataagcattgtagatcacagagtaattgtctccagcgtggagacgtaacaccgtagttaaacctg  
ggatcctttatattcgtttcactatactgtttctagcctgaacacaaaatggattgacattatcattgcaagactgtcccgtggaagacaaccgt  
caagttttattatccgcaatgggtgatcctatgattctgtatccagaataaaggcttatgagcttggtatctgtccttctcctagcattcctacagaa  
gacagattttacaaggatataacagacgctgactccagctcagattcctctttgtctttgcttcgcttcaccagacacagaggatgctca  
agtccaaggcaccagaacataagcaaagtgttaacagtataattgtgacactattatctttgattatgattttgtgacggaaggctgctg  
ttaccttatgatttaacgaagttacttttctactggaattgcttccgacatgaatttatgatgacttttggaatgaaataacttttaataatgt  
aactagtaagttatcccagtaagtgtcagacaatgctatgtgagtagctattgtacgtaaatgcatgaagaaaaagtggtgatagaagc  
gtaacaaaagattatccttttagaataaaaaataagttttattcaagcaaaaaatggaatattcctccttaaatgtcgaactgacgtt  
gctggagagaaccgcttaccggaagcttcattttcagtcaccattgaatgtagaggttggttaaagtaataatcccccatttttagttcct  
atagtagcattttctattcttaataatgctgatgattcttgagaatcccctcagcattcagggcttctgccaagtcacattcgtttttt  
gcaatgtgcaagagcatacctagcagaatagagaggaatcgttcagatgctatcacaggttctgagatccctgagagaaaactaaacca  
ctatttagcagctggtgagtgaaagtcgctgggatgagcatcagggactgtcgtaaagattgaaatgagtgagtgaaaggaaccgagctga  
ggatcattctatttttaacattatcttcaaacgctgacttccagaatcagcactcgttccagttgcaagtcaagcatacaacaatcatttctt  
tttgagtccttaataggagctgaaaaggctaaagaagactcaaagaccaatgaaagtaactctgttatcaacaagtggtacttgaaaatt  
tgagtcaaaagaggactgctgtcaaaaataaagcaactgtctcaatacattcgggtccgcatggattgggtggtttgatgactataacag  
actacaggtgattcgaacattcaagcaggaactcctttctgtggacaagatggcaatccaatgatccacatctcgttccttctgttctgatcaca  
gtactagaccgcaatattcccattgctcccttttaaactgtgtcttgggatcatgcttactttacagactttggtctcttcaacgagcagta  
cattgatacatggttcaagatcaactggtcttggattgagatcagcttaagcaatcattagataaaaaagtcactgtacataaaaatgaaa  
gcaaatcctaaattctaatcgaaaagctacatttcattgctgaattagtagcataaaatactttatttagccaccgataaaaagccttaatacat  
agtaataaaactcaaaagacaataaaaacgaaattcaaaaagcgaagggaataataataaaaggaatcagaattcacaagacatag  
atcagcttctgcatggttctgatcacgaataacggaatagcgaatgagcaagtcgagaggatcatggactgtaattacccgtaagctgaa  
ataaaaaggattttaaaggaataaaaatgattttctcgggattgacggtgtaaccagattggagctaggatttcgaataagaattgctggctt  
gactcttcttctcagctcctcagttgagcgtcttctttcactgtaggtttcaggttcttctgaagcaaaacattaaagattaagaccaaggca  
aagagaccatctctaaaacgaagcagaccataatcgatggcagcaagcacatccatcgatcaaacggtaatgaaatgaaagaaaagag  
agcaccgatagaatcaatggtcaaaaagatatgaaattccctggacagcttcatgaggaaaattggatataatgaggaagaaagccaatgt  
tgacaaggattgtgataaaaacgccattaactgacagggcattcgacatgacgacgaatgccagttggacggaagaatgagcatggcctg  
caaacggcagaaaagagcaccaaataggccaacgacgagaagagatttccggccaccaacctcaccgtatagtagacattggaaaagg  
tgacaaaagatagtagttgaaagagttcaggctgaatgaaagagcagttgaaaggtcctggaccaggtataaacagcaagaggaattgaggc  
gatcaccagctaaaatgaaacaaagtatcaagaccagcgggtgattttccacgataatgattgatgactggggaattaattggacacaccagc  
aacgggtccaatgacggcaagcgtgtgacggctgcttgtgggatgtacctggaggatctgttctgacattataaaaaaactccaa  
aaagactagcgaacagaagtaagagaagaaaacgaaaatcaaaggaaatcgttataagccgaaaggagaaaaacaatagaaattggatga  
aaaatgaaaaattaaattataaacgaaaaaggttaaagctagtaagacaatgaatcaactcttacaactaaaattaagcgtgtacactt  
actgtgtcttttaattggaatatcaactttgtctgaagacaactattggctctagtcagagagagagtccttggttctttctatcgtaaagg  
tgctttatctaaagtacgagccgactatgaataaaggctacttactgtttctgataggaaaatcgacgatattcacaagtaaacaaa  
gaaagcaagaaaagaaagaaagattgaaagcagagaaatgagtcgaaagtatagcttaattcaaaaagaaaagtaaacatgaaagaa  
aactgacgacgaaaacgaaactgactcagaatgaaaggaatggaaaagaaagcaagcttggatataaaaacaagaatggttacattgaaagc  
ttcaaaaagatagtaattgagtaaggttattctgcatgattctttctttctttctttctttctttctttctttctttctttctttctttct  
tcgtctgcttctggtttgctgtttgttcatgaaacaaaagatcagttctcagaggaatcaagatccgcttttagctggtttggaat  
aaaatagagaataaagaaaaagaaaaattgaaaactacaatattgtctacgtaagattgctcaaaaactcctccttggactctat  
aatgcttacctcggagacattcgaacttaacaaaacacatcacatcgttaggactcttcattggtttgaaaataggcattcattcactttgtc

tttctgtttcatcgtaagttgcataaagaaccattctacatctcttcattggaattgaggttcattctttactgtttttgatcggtcttgaattctac  
ttttagacccttaacttttctaccagatcatgaagcttctcttgcgctgggctgtgtttgctgctcagctttagcatctactgcgtta  
atcctttgcgctctttatggatgatgactcgttctcctcaaatgttcatgcccagttccagcggcaatggcattgcacctccctctttaatcatcc  
tgctcaaaaccccatgacgttgacgtggaagggtcatcgttggaaccaacgatcattacattggtatgtaagccctctgtgacaaagccaa  
gattaatagccatcatgagtggttcaacaccagcaccataaacgttctcttgactggcaagatgtgtacttttctcaagcatacctttgaaa  
ttggcgattcctcatgggatatgccgcttctctcttggcttgaacgaactaaagaagcaccggacattgctttagtcgagcctgatcat  
gtcatgcacatcacaacggagcaacgcttctcttggggccttgcctgcatttctcaccgtgatcgttgggtctgactactttactcgtacaa  
ttacaatgaaaccgcccggagagggcgttactgcttattgtaattgacactggatcaacgtatgatcaggactttggcggccgctacttgggg  
agctaccattcctaacggcgagaaggacgtagacaacatggtcagcactcatgctgctggtagattgctggaaagaacttggatctcca  
agaatgctaagctcgtggctgcaaggaatgcgtgctgatggtaccggaagtacttctgatcatcaaggggattgaattgcttcaagcaat  
ccaagaatgacaacgattccgttcttctgttgcataatgtctcttggcgtgacgccagccaagctttagattcgtctgagcgtgcatcaa  
tggtggcctcttttgcgcttctgctggtaatgatgctgaagatgcttgaacacttctctctcgtgtgagtagcgcctgacgggttggctcat  
gacttggacggatggcatttctctttagtaacctggttctgcgttgacattttgcccctggatcccttattcttctgactggattggatcaac  
aaggcttctatgttactttctggtacttctatggcctctccccatgttctggttggctgcttacttcttcttgaaccttcttggctcacaagcc  
cgctgatctcaagaagtatatgctcaaatatgccttgaacgataaaatcgaaggaattcccgaaggaactcctaattgttcttcaacaatttc  
tctgagtaaatcatcgtcgtttatgattctcttttaattgtcaatccttattatgtcatccaatgaagattgtttatagactgcttctgtt  
cggaacatcactttaacgggttcttccaatagggtattaaattcaaacgaaaaacgggaaaaatacgcatttctatgaaatctctcttc  
tgtaaattatgaatgaatagcttagattgaatgaaaaagctgcttctgattgttataccatgtttatgtaacaacagttgagtagtctattgc  
caagtctaaactttcaacgtaaaacctaaagaaaataacagaagccatgtcaatcttaataattgcaactaatttctcccacttgttgg  
cgtacttttgaattccaagttaaaggaataaatgttctttagacagaaaaacaacattaaatgaaaataggtacgtagtagcaa  
tccaagacagcacaagagtaagaagaacggctatcagcatgaaatgaaagacacaagaagaaaatcttgaaggttgaatctgttttc  
ataacattaatctctgtagcttctgtaacaagttgaagattgttctcagattataaagtgtttgttagagtagttcaattctaaaccaacca  
aagcaaccgtaggatttgttagcattagtgctattttgttcaatttactggaacagaaaactggcttataaaagatttactttctcattct  
taatgatagttgaagaaatagctcgcagaaacaacatctatttctggccatctctttgtcgaatggtaattgagaccagcaaaactaaccttc  
tcaacattgttcttctctttttatttcaattcgtaacctgtattaattgcatattccaggggtactatttacttttcttcaagccaaaagag  
gacgtaaggaccaaggatgtagtcttttataacatagcattcttttctcaaggaatgtctggcgtactgcaatttagaaaactgtacgag  
aaaagattgatataattgaaacctctactattccttgttactcggcaagtaacggcccttaagttaaagaatgactgacgggcggtaatgtt  
tagaaaaccagttgaaaaagggatgtaacaacatgaaaaggtttggcagtagttaatgttagaaacacagaaataaacagaacgcta  
aaaggttacttaacgagttcaaaagttcaggatccagaaaaaaaaccttttcatattgtagtaaaaaagtcctaatgttgagagaaacag  
ttattcggataaattatggttccagaatgaatgtttaaaggaatcagaaaggaaacactacttgaagtgttctcaagaattcttaa  
atataaaagtatgatataatgacatcaagtacaattataatcaagtttcaaaaacttctccatcatcaggcgccttttttagtaaacagatt  
cctactgaggcttgattattctggacaacaagaactattcagaaaaatctcagaaaacttgtactttgtaaccttattattgttgcgaag  
gcgtatatacgttcccgtatgatggattcaagctagttggactgttcaactcaataacaagcagcttttccaagaaagggatcaatata  
tttacttaatgaggaaatctactgtactcttggcattcttggcgtcaatgccaacatataagaagatcgaatgttggtagtactgaaatctctcat  
attctctcacagatgacaagctgttatgtcgacataatagtgctagatatttctgttcgtacagagatcaaaagatcataataagtttttaaac  
cctatgaaaattgggattccataactaatgctgatttctaaaggattacagaaaaactattcagtaatccagcttcttcttaaaaaaaaa  
tagctatgtcgtcagttctcaaatttacttgaagcacatttcaaggttgggttcaatgttgagtatttgaatgatagagtttcatgttgttc  
gtatctcaatgtgaaaatgaaaattgcaagcgtcaagaaaaagatagagtaattaccaaccaagttatcttcttagattacaagtcgattc  
aagaacttttcagagaaactgaaagatgtcgagaatcaacctatgaatccgctccaaaaagaacaaaaaatcaacctttgtgatataat  
gtagtaataaacataaatttacttctgagggttcaagctcactaacatcttcacggcaactcttccagcagatgttcttacccttagacc  
caaatcatcaagagtagtcttttctacatatcataaatgaacagttctcactaacagaaagattgatagattgaaaagcgaagaaaa  
agaggaagcttcatggttgcctacgccgtttacgtttacgtggacactcatctagtgttactgccgttgccttcgataagaaaaatcatcttt  
ttcaggcgacgaaaaatgggttgttattgttggcccttttagatagcgcctttgacggcttggtagcgtcattcaaaaaatatttgggaatgg  
aagtcacgataatgacatttgtgtacaaagtcgagattgtcgcttaagcgttggaaaattaactttagcgtattacttctctaccttgt  
ctgaactgagccgaggcaatcacaggagaatgctctctcaaatgaattctataatagcaacgatttaattaccatctactcaagcattcaca  
tcaatgctttagcttttgttcttcttatgataaatgcaaaaggttggcagtttcaaacaccgtcaatgttgatgaaatcgatattatgaag  
caagagacttactatcggagaacacgaatcaagacagttatgggacaaggcttcaaaataaaataagaccaccacgaataatgaaaagaca  
ggtgctttaatgtgcagctctcaatttctctggggagcatctttgctggctgctggttacgaaagtgccatgtagctcagttcaatgcaattta

agcaatgcgcggaacgtctgtctcaattatcaagacgtttgggagatgagctatgttgaanaatctcattctcaaccagattgtcagtgaaagtata  
ataaacttgccaatgcattatattcttctagtcagacgatcgatcgactctacattaataaaccactctctcaaaagtgcgccaagt  
aacacgggtcaaagcattgtggtcaacaatgtttgcaagttgccaggatgacaaattattgctaccgcaggtgggatggcgcagtcgtatata  
cagctgtaaaagcctctctctagctgttttaaaataccattctctacatcaattctttatccttctactcaaaactcaatatcatcgctttggcc  
agcaaggattctgaatctctctttggaaaataactaatgatctcattatacatatggactcttgatctctcccttttacgctgcataaatattcga  
ataccaattattataatctttatataataaaacaactcattatgctctgtatctgcgtatagcacttttttaagctcaaccatgtgaaaagaa  
aaaaaaaaatgaacttaacaagtcattttgacttcagaacaatgttctttcaactaaccaaaaattaccctaagatattaagtaattact  
aaaataattatgatcttcatagatgcaggaggttttaagcgtcgtgtccagtagacttatacaaacgcatagcatacagaaagtgttagtc  
atcgtgcaattgaaatgttaatgatagacaatagaaactcaaatcgaaactttggcaatgggaatcgttagctgttcttccatcgattatg  
cgtatcaacgatcgctggcaaatcgtatataaatcggattccttcttctttagtgacgacatctggacagccttgctaaagcttctcttct  
tcgtcatctgttccctcgttatgtttgccagttcgtcaataatctgttatctacgtcgagttagtaattagccaacataaagtaccataaccgt  
cataataaaatcccgaanaatggaatgcctcacactgctcgtcattgcaaacctcctctgtagtttcatatttgacattatcctcattgggtcagcct  
tattgctatacattatagaccgaaaaccggaaccttttcaaaaattggctgttaaacgaaaagccttaaatctatacaaggagaaatg  
tagtcaaccgggtgacgcaatagctcgcactagtgaggagaactttcttagactccatactagaccattcacgtttaattattctcgtcaatatta  
gtgttattttgcatctgtctttgtcaatagaaacatgccttttagtagactcagaatgcagcaacaggaaagtcaactccaaccttagaaagca  
tttctttttctgaaatacagctttgttaagtttcttcttgaattcacaattgcttggtatttacttaggtcattttcttctcctaataagcttatta  
attttagccagctcatcctctgatccactaacgattgattctctgctggctgtgactgtaactcgttgaattcagtttcatctacacttttaagcc  
aaggagcatattcttcaacgttgtgactttctgagacggtaactgggcccccaacctctgataaagaacttgactctggatcaggggtcagac  
gtttcgtccgctattatctaaagtattggcagttaactggaagataaaccattctgatcagtgcttttctgatatccgaaggtagtgtttcctta  
cattgtagttttgctgtttctgaagattccaactcataatcatctcggctattttcgaatttcatcttcttttacgaacaaagcaagaga  
atctaactgagaagaattgtttggtctgcaaatcgatactcagatgttgaggagctgctgtttcatatgccagctcatcttcagaatcaagct  
caataacgatagagggcttgaattccaatggctttgatgaatttaaccattcgtctacaataggacgaggcgatggttttagacgcttctttg  
aggaagtacgttgggtgtcccgtatcaccaggaagaatcgtgaatcatcgaagacaagccaactttcagaggtgtttacaccagagggctt  
atcggcttttcagaagttgccgagagggagggcacggtgatagaaggaagctcgtatccctaatttagagaaaaggcttcgtacaacagaagga  
tgaatgcctcagcaacaaaatcattgtatttaacccaaaaccaactaactgattgatcgcattttccgctcaattgtttgaggatgtttgaa  
accgtcagataaaccagatcggtttcaacccttaccactttattttcatcatgtctttcagataatatactgctggagctttccggtttggaatcgg  
gcgggattccaatgactttctatgcgaggagtctgttttcaacaagactagacttgcgaccactcgtaaaggatgtctcgttgtttggcttggatg  
accgacgctggtcattttctttagcttctttcgaaggcgcgagcgtgacgggtgatccaaggaagaatgctgaaggaagcataaaaggc  
ggtgcaaatggaaaaggaaatgtattttgggtgtaaacctgaagccattagtaattgtattcgtatcgcgttaaatcaaaagcaaaacaacg  
ccagtcaaggtatcgaatgctttgctcttattttattttattatacaacataaccggtctactggaggctgtggtggggcagaattcggataat  
aaaggaggaactgggactaaactggttaacaactgaatgtctttatagggcttcaatgaagactacggagatcgcggatacctcacgataac  
tcccttataagaaaatatacgtcaagggaaaatgaataacgaaacatagcttggatcctctacattacgtcccatctcagaaatagcacatac  
cattgttattagactcggttgtcttacttatttctccatcctttatctgactccttctggactgttttctgaggattcaaggcttttgacgca  
aaacattaagatctactgcttactatctatataatctatctggagatgtgtaaatgtcaaatgtagatgtttgtttgggttagacttatacagata  
acgacgaagcttggattcattaaatactcaatgagacatagcgaagtgcagtggttaacaaatggttccgtaagaaatctctcaagatgaagg  
ataatcgtcttgaanaataaagaatatactaaatacatgcatgttatgtttatcgaanaaataatgacatatatgtttattctctaaacg  
actggacgaaaactgccaatgtttcataaagtagagatagtgtagtacgttctactccactttcctttacattatagacttcaattcttctgtg  
ttgcctttgaggtgaatgaaagttcattagatttaactttcttctcagttacaacttctccaagctacgaacgttgcgttagcttctaaaagctg  
ttcttgacactttcgaactagaattcactgctgattgtcaccatgtggagagaagttatccaggatgcgttccactttgggaggaattcatcgt  
ctaaaactaggcttaaatctcgatacctttgttacttctgagttggtttttgttccgcaaatcaactaggaggatcgtttactatcggaaa  
gtgttctgaaggctgctccagtgatttataatgtcaaacattcaactccgtagcatttctgtatcagcatatggagtggttccggttaagttatta  
ggcgatcaacaaaactcctcaaaaactgtttccctcaataatgtctgattaattgcgacagaaccctgtaaggtcctttgaggactgtcaat  
ttgagctttgtgattctcacaatgatggaggtgatttaagcatcattcaacgaggactgttgataggggaagtgcaggggtatcaaaagctt  
taactcaactgacttactgactttcatgattgtgatttttttcttcttgaatggagactccatgctttagttgactgttagccaacaaggc  
ctttctcaatgaaagcttttagcgtagatcatatttcttacttcttggattttgaaacatacaactccgtaaggtcactttgtgacaac  
atccgtatgtcttagcaattcttctcgttcaactgcttggtactcattataaaggaagatcacattgtttacataacctttatacatgttaata  
gtaactggaacatctcatgagatttgagatctgaaaaactcattcacatccgattggatccaattcaagcattgagctgaaaaagta  
aaaactggtgaagggtgcttttctgctggttaaaaattctcaatttcttgaacactgactgatccttgattgttcttctcattgcctctgatgaattc

attagtgtattataacttaagagtacttctgatggttgactgcaactttgaaagctcaattcgagttccttagtttgcctctggaaccttctaact  
ttctcgtactctcagcaatttcggaagtcatgtttccttctctgatttaaccaagcaatttcggagaccaaaccgctcttttcttttaattcaat  
ttcagcttgagttttattcagatctctaagacttttccatacttctcttataagttcgttaggtatgtttctggagttgcaatttagatactaaat  
cagtttttctcgacacatgcggttttagtttctcattggtttcatccctcgtgtttcatccctattcaatagctcattcaatttgaatttcaaagtcgc  
gctgttcaattcagtttgaagaagaataattcattatgcaaagactggttctgaagatccaggtcagccttctcctgactttcctttggaaacttt  
catgcaggagatcatatctttgcttatttgcattacttgaaaaaatagtcagcttttcttggctcagttctcctttatacatcaatacgcgattt  
tttgatttcaaagacatattcgcagttgaaagatcgtcgttttaaggctaataatctttgtttagttgggaaatttgaatgaagttgttctaactgc  
atagctaaacacgctttcgaatcctttcatagtttaagtgagttcttagctgttgcatatccttctcttggtaattattgtctctcgaagctcattctc  
ctcttttaattgcttcttctcgtcttctaaactccttaccaggcttcagctctgcaatttcatgctctctatttcttctttaaattgctgattt  
gattcttcttttagagtatcgtagtttctcagaagaacttcggaagactgttgatgttcttgggattcttctcgtcagttggtcaccctagcagttaggc  
cccagtttaagcttctaagctctcaatcttctcgtgaagagcccgcctcaagttgacgatcctttaaacttttcttggcagcaagcgtttttc  
attctgaagaagagattttaaacaacattcatttcttactcctttgagaatttctgacttcagagttagatatttcttctcgtgtaagtgatgcta  
tagttgatagattacgaaattatcaatttctctggcgaagatgacatagattcaaacacatggcctctagaatggttccagttacttaaat  
gaccgtattccaacaaaagctggcctaagtaaataagttgagtagccaatcattgacgtccagcaaggtaaacgaccggcgtttggcgatcct  
gattgaagctgatcaattcagaatccttctgctgctgactgattggaggccataaatgttgatgtattgtttcatataattccttcaaagctcctgc  
ttgtgtgctgaagagtttaagagaccctgttccagatttcaacaaaggcttgaattttaaatacttgggtcattcaataccaatcatttctgaa  
aagccttgaatttctctaggttaatcgacttctgtctgaagccaatcggtaataaccagtttgaagctccgtaagcttcgcatctaactcag  
aaagagattgaattatcatcattttcttaggaacattaatatttccatgaaattttgaaaaagaatgtccgatgggtgctgaccatctagtgtta  
taggaaggactcaaccttacacaaattttgtttgtaataaaaggagagcccgtagaaaagagactagttgttttttttctttgatccattgt  
ctttaaagtttgattcggtttcgaaaattgagaatttggttaacagagcaattgacctgaatagtcagtcagatgaatcctaagtaagattaatt  
ctcgtatttaaatactatctttaaagtttctggtgatattatcagattcctagaaccggtacctttaccttccaaagatgtgtgctttggaca  
ggatgctgctgtgtaacaaagcatttatattgaaagcaattcacgggtaacaatttcaattacttttgaacatctataaaggcagaattt  
accaaggttatataaaaattataaaatgaaactaaatggaaccatactgggaggcattaaaggcgttgtttgctcggcaagaatagtttcca  
tgcaatttccgattataactgaggcaaggaccaccggaagaatgcaacgaataataactctggaaccaattcatttctacatacttttggat  
atggatcgtcaatgcgtacatttactgttactgttacctgggatggaatttctgttcttaggtgtattaacaacattttaggcgtaaacaaac  
aaacaattccaagttctacaggagaataagtaaaaaatggatcttagattgtgacgttgaaaaagttcagttgaagaagaaggaaaaaa  
aaaaggaaccaagaacagctactagctctcatccaacgagactttacagtcatttctttccgacatacagtttaataaagatgtaattaaag  
aactattagtttcaaaaaattatagagaaaaacaaagagagaaaaaagtatcaagagctagtttctttatggatagataagtgagaaacat  
ctttgacaataaacaacaatcatagctaaattgtagatgccctttaaattacctttccaagagccactaaagtaagtttcatagggctgtagg  
atcatttgcggacttgaaccatgatcccaacaccagggtgaaagaagtaatggcagaatcaatacgtcacaacaagctttggagtttcta  
ttctgtcagtttccatgtaaaggacatatacgaatttagataatacaacagaaatccgtccagataaccaggcctgtccaatccatcac  
ggcgtctttgtcttctgaaagctggccttctcatgaagagaccaagtgccatcgttattttatgaaccaactccaaagcagagatgtccgga  
gttctgcaatggctcattggcagaattgaattcagctgcataatgatcgtaccaatctggacgatctggatcagcttcaatgccaacaactaga  
ccgatatttctcttcaaatctctaggaatccattcgcggatattgttgatgggagttgatcaatgtagtataatcctcctcctgagccaacaat  
actaaataacgaaagaatcagctttgagaacaggcaaggcatctttagtaggcagaagaatttggaaaaggaaggatttcaaaattc  
ctggttacaagacgttcactgtgcatcgtccaaaacgtaatgagtgtaactggggtgattgcttcgcaaaaagcgagatactttaaacaatct  
ctttcaaatggggttttctgctgttgcgaatttttgcggaatccacagattcatcttccatttatcgtcatccggtggatcatatactctcatctt  
ctttgcttctcaatttcatcaactcattcatgttctgattgctttgcaggattccaattacgtattcatcattatcgttaataatttctaaggagcct  
caagttccgcttgccttcatgttcttccgatgccttccgttctgacttggaaatcttcttgaagcttcttggcatagagagctcggttaaatc  
cttcatgccttcaatccaacatagttgaagataaaaatcatgccagcactatgatgcaagtaacaagttttcattcgaagctttggcatg  
tttgatactctggtgatctttttgttacaagtaactaaaaaacaagaagaagtaagcaaaaaataaatgtaaaagatcacgacttacaat  
cccaagctcttctgatctcgagtaccaaattacctacagatccaaaagtcacgctatgtactcaggcttattcagcgaagtaagaataaa  
aagttttaaacttattaaatctttatagataatttgggtttttaggttcacctgcttgtttgttgaattcagatcaacacggaaccagtcacga  
ggaaccattacactagcgtaaagtctacgtgtatacaaatgtcctgtcgaacaacaacacatacgaacaatttgggttggaaaacctgcaa  
atttatcttcttcttataaaggagtaaaaggtagaacaggaggttaagctcagaagctgttccagaaaacattgtcgttaactggttcaga  
aattttgttggctcatctatgcttccgaaccatcattattgtatcgtcttctaaccgtaattaatatttttccctctttttgatcttctcctgtg  
ataaacttcttagctcttccagatttgcgtgttcttaatttcttctcctcaactttactattccttacaatatacaaaaaatgctaggtaatg  
gaggacattacaggactagtctaaaatctgaaagtagcactcttctcgtcaacgcctgcaaaatttcaggagatattcctctctacagaagtttc

tacgaatcatacatctagcgttcgagccgtatgtcgagtgctcttctctgcagcatcttgactgatatggccgaaatatcgaacgtcctgaat  
ccagttctggccccaaactcaggaaccacagacatggttttccaacggcgatcttctactaatgagagtctgcttattaccgtagatctaccc  
gtagacgattttgttctcaagtaaacctcgcaatgatagttcaagttgaaatcaaatgtcactgaacactactataagcttaccacaac  
ccatccacctgactcttaagtacagaagttatcctcatatgcatggaagtagcggaaagcctataacgcctgttgcggaatatcctgaggccct  
tctgcttctctgcaagacgcatggtggtccaagtctgcatctagtttgccttctgttctctacatcttgaattcttctgagcttaccgagaac  
aagttccatcctgcttttcccagggtcagtgaggtccgaaagcgtctcatagttggcgatcgagttaaagatggtttactatacaaggatgc  
atthtttagctgtgaagctgttgatgtttactgcagattattcggacgaatgatagaaattagcattacttttaggcagagcattggattttcaa  
aactgttccatgacgttacttctcatcgtttgcgtgattctcgaaagaagttatcaatttcgaagaacactccctcctcctgaagctatggcgt  
cgatctcgccagttatcgcttctatgaaaacatthttgtctaccccagagaagaaacttcgacatctgactctgttgattccattgtgtctgaaaat  
tctatgccccatctactctacctctacccaacttaacatcatgctccttatttaacttcgagcactctttgatgaaagattcagactctgtgaa  
gctgaaacagaaaaggaccgaaaggggtattcacgaccttactgattgttactctcaacttcgagtaaaaaccgtttgtctattctatctt  
gtcctcgctctagacaaagctcgtttgcatatgaaggtacagcctgttctcaagccgggtcttctacttggggataagcaagaagg  
agcatcgtcttggcagacaatgtacctaaagcatatcgttagcaaatagataatcgcaatggaagagacaagaaatcatcttgaaatcatt  
atactgaacgcgacttctgtgatataagatataccgagatthttggattaaaccccttcgaccttaacgtaattcccgaagatttcgaca  
accattcattagaacggtttccataataatgaggtgcacgctgtaattcgagactcttaatgcacttaatagggtagacactttacaacca  
gtagttcatagcgttggatcttcttttagactatgtcccaagttgaaccgttcattagatatggttctaatcagactctgcaaaattgagttt  
gagagggaaaaagggccaatcccgcatttccaagtacgttcatgaagtgaagactctggaatctaggaagttggaacttaatgggtattt  
aacaagccagttaccaggctagcaagatccactcttataaatggggtttaagtagactgaaaaaggttaacctgatttagaaaatcc  
cgaaagtattgaaatgatactgaaatttcaaccaaggttaactcgaacccggttaaaactgagaatcgtcttgcgttactccaatgaaatgagc  
aacttctatgcagcacttggagaacaacgtcttgccttgcctgactctctgttcttcaaggaactgtcagattaaaagctactgga  
tataactaatggtgatacagaaagtgatattcatatgttctttagacaattatcttctattgactaaataaaactcggtttaaaactgaaaca  
taagttgcaattgcgaccattgcctttggagttattgggtatttcttgcattggaggatgtttcaactcgggttccgtctctcgtccatctctacg  
atattgaaaaatccgattctaatgtctaaagggactacctcctcctttaaactctatggcctacaactgcagcttcttggaaactcgtggtttcaa  
atctctttgtatttgacttttaatagcacgggaccaatggaagcagcatattgagcgccaacaacagcattgtttcaaaagcatcttatctc  
aaacaatcggtttatgtaataagcttatttctataatacaaaaataactctgcagttactatggttaagttcaataataactgtagaaaatt  
actaacgaaagcagatgcaggacgaaaattggtttccgctcttataggggttatacgtatcgtcacgaaaagggagcaacgggtttgttttag  
ggccaagacttaagattccattaacaacattacgcaagttgattgattgaacagcataactgttcttattgtagctgataaaactgtatga  
gtgtcccttgatttacttgatactgcagaacaggtcagtttaagagcttccgcccattacgggcatgtgagctttgaaaaagcgggttctgtt  
tacaagagtgcttctgctgctgaaagtctacggtttaagcaccacgctccggatthttgaaagcggatgtagatcaaaaaataagcggctc  
agtctctgaaaaagacatttggaggatctacaacctgaagatatttactgtaagtaaaaaaaataaatccagaagaaactaacacttagca  
ggaactgcagatgcaatggaagcgtgtctattcacttctgaagacaaagcttctgtgggttagtacgaaaggcttgacattgtcagctcga  
aagtgccgtatttctgacttttaaatccggcggatacctcattcggttttgaaaaaaagagaatgtccgtcctattgaaatgttctgattga  
agggcgaattttactttgctattctgagtttgcattctttgtaatacaaacggctggcgtagtagcatcatggttgggtgattcattgggaaggacag  
ccgttaagtttgcactttgctatccttatattctaggatttagccagattttattgaagtgcacatactgaaacaacagagctgttcaaatatc  
aaaggtcacaacattaagcttcaactgatggcggaggcttaattagtgaggggtgagaaatctgtatagtagtaaggaagttcgttgattaat  
ccggaagacagagatattgttattcgttggcttccatctcataatgcagcaggtcctgctttgtaaaatttagcttatcaaaaaatcatgaa  
gatagtagatgttctgcttcccattgcctttcatcgaccgtcctcgtggcttctttgttggatcattcattttatgtttttattgtcttatcg  
ttgtatcttaataatacagaatttgattttatgattcttcttttacacgtttaatgcttcacagcatgcctttttcattgcatthtcaactttcctttg  
ttaacaaggcatcctgctgtgaagtgagaacactttaagattgtttgacttgggttacacagttcaatcggattgttaaaaatcgtttcattg  
ttaataagattatctactatcgagagctggcaaatgctagtttaataataaaaatccatgattctttatthtttaaatagaaaatcctacagctg  
taactcagagattattgtttgtaagaatgattcactgtacctgtatccataaattggaatcctacactaatacgttatttaaaaatcgtggctg  
gaattcttcttaaacagttgagcccgaaataagactcgccacaagtttaagccacttaagatacgttttaaaaaatattgaaaaatctaaa  
catacatgaaaaatactgttattatattaatagatttcaaacatggatcatgtatttgaatccacactgggatgtatattgaggtacaaagtt  
cgctttgtgactgtgtgcaactcattatttaattcgtgcgaaacttttaacaagaacacaccaccaagtgaaagcaaatgctaagatgtag  
atcaactggaggattcggttattgacaccaattacgatgaggttattgataccttcgatgacatgagttgaaagccggagcttccgtggatcta  
tgctatggtttgagcgtccctctgattcaacaaggccatcatgcctattttgggtgagcgcgatgttctgtcaagctcaatccggtactg  
gtaagactgccacttctctctctgtcttgcgaaagattgacacaagcttgaagcaatgccaagcccttatcctgtcctactcgtgagcttgc  
caacaatccaaaaggttgttggcttgggtgattgatgaatgtgaatgccacgcctgattgggtgactcttctgtgacgatatggctgc

tttgaagctggtgtccacgtcgtgtcggtactcctggtcgtgttcacgacatgattcaacgtcgtgccctcccactgacgctgttcaaatgttcgt  
ccttgacgaagctgatgaaatgtgtctcgtggttcaaggatcaaactacgacatctccaactttgcccctagtgtcaagtgtcttgctttc  
tgctactatgcctcaagatgtttggaagtcaccaccaaatcatgctgacccatccgtattctgtgaagaaggatgaactaccttggaaaggt  
atatacaaatctacgtcgcagttgagaaggagagtggaagctgatactcttgcgacctttatgagactgtcacagttactcaagctgcattt  
tctgcaacactcgtagaaggttgactggcttactgagcaactcactgagcgtgacttactgtctctccatgcacggtgatatggaccaagctca  
acgtgatactttgatgcacgagttccgtactggatcttctgatacctcattaccactgacttgcctgctcgtggtattgatgtccaacaagtctcttg  
gtcattaactatgatctccctgctaaccgcaaaaactacattcacctgattggctcgtggtggtcgtttcggacgtaaggggtttctattaactttgtt  
accaacgaagatgttcgatgatgcgtgaaattgagcaattctacaacaccacattgaagagatgccatgaacattgctgatttgatttaaag  
tgtttaaaagttccgtgactagacgccatcgattttctgtctgcttctattcttacgattcgataggttggaaacacatttataatattatctc  
ttttctttgcttactgttctaactcttttatatgtgtgcgttgggagatctcggattgatcccaaggatgagttgtagtgccttgcttagaa  
gaatgtttggtttttagcgcactgtgtcttattgtttgacaataaaaggctggattggttgattataaatTTTTTTTgttttagactcgcgcaga  
ttgactgtaggatggttttagaataatgtttaagaaaactgtatcgtttcaagcagaggggagaaggaggggcttgtaaaattccaagat  
ataaatagtaatttagctggttagttgacggcgtagaagagcgaaaatTTTTTTTaaaaatgagctattcaaatgtattcattctcgtccttg  
gtgatgactgactgtagtaacttaataagcatgcaccagacaagaaaactttgatagagcaacaatgaaggttctgtgtattgggaataggta  
ttcaattgctttctttggtcctttctctcgttcttctcactgtagtttttaaatattgatttaaatttgagagaggcagtgagcattctaa  
aagtggttagtgatgtctcgtatagactcaatccatgtggcatgcacctgaaaacacgagcgcgtttgttacaacaacgaaaaggcagggg  
ttgctgacgatttttagttttgtcttattttggtattttgtattacagaaaggtttggctcaagttttatgagaacgagtcgcgagtttagaag  
cacgcataaaaaagtgattgttttagacgcaatgttgagcaagtcacaaaacgatttctgaaaagaaccgtaaacatgaaggtctgtcagagga  
agcacaacctaaaacgagaaaaagttatggtatagagatgaaccgtagaatgcctccgaaaagacatgcaagaacacgtacggaccttgacgg  
catgcggaaggataggaaggagagtgctgagagaaaaacttagccgacgctggccgtcaacattgagtcgattcgagatgtctctagacag  
gtttctaggagaatagtttctcactaaagtcccatcaagtatattgctactgagaaggatggttcagtcgaaaagacaactgttaatgaagct  
aaagagtgcacaaaactcgtgatagaaacggagaaatccggtgctcgtcatcggaggttcgattctcttcaatgaaggcttaccatggaaatc  
gaaagccaaatcgaagggtccatagcagctacttctgaaacttctacgtacatacaccatcgtctcgaatcattatctgcctcaaagaatac  
tcgctcttctctattataccatgcgaatccgctcaaagatgtctgaagacatgaaggacagcgtcaaggataagggcaagttcgaagatgaat  
tcaacttgcaaaactcaacataccttttagaaaagaggaagattaccaaccgatactgactgggaacagctctcccttcgggggatacattg  
aacgtaacactgaaaataaaagtccagatttactccgatttgagattcttcgacaaaacgactgggatgaggattccaagttgattctagctt  
gccttaataatacctgagagcgtcaataaaacaggtgtggcagtaacaagaacagttatcaagcatcaaaaattcaacaagatatgcaaggta  
taatggatttcaggttacgagcaatattaatattctatttgaagaattttcagctaacgactttctagacctagaactctgtttcagaccgc  
aaagagtcatcctagattttctccatggatccatcgttttcaagatacagaagccatcattaccctagcggatcctttacagtctcatcagact  
cggacatttcgcttctgcgacaagacaactcaaacgttattttcaaaactgaatatcccatagaaaatgcatgtccattgagcttgatcttct  
atttgccgaaactgattcagcatgtgagatattgagctcattttcagctcttttaatgattcttaggtcttgacgcccttctcctttggttaa  
atacgttgtccctacattatctatgctaaaaagtggtacttgcctgtatttcttccaaactctatttcttaatgatttcaaggtcgtgaaattg  
catttctgacttctctttgacgaaacctcaactatccttttattctatgtataaccttacctcttttagggataaaatggatttttctggttt  
cttgatagacttattgtaatatgtcaatcaataaacactcgtttgaacatcgaataaattcattttcttttgttcaagacaaataactattataa  
tagacaatctattcataatgtattgtataattcattgctagacatagctgcattataaaacctgagcaactcattccttagttgccgttagact  
tctttcagcacatattcgttgaatcgaagggtttgttcaggaagccggttaccaccattttttaagacaaatagactttatttctaattattatt  
aattctttgtctaatctgtttaatctcgagacaattctgttataagtataaattcggttcagctgaaaatcttattcactactgattatattga  
atggcgacaattttttgtaagaaacataacacgagtgttatctaagatattaattaatagtcacgaattgattcattgtccttacccttgacata  
cattgactgtccttaacaaggcttatattgatctagcctccgataattttagaaagtaagaatttggaaactttataatcttctttaatcgtct  
tgctagctgtcctcttaataagtgattttacgaccaattatcagaccgcttgaactatttttgcctattttattgacaagcttcaaatatttc  
aacctgaacatgcagaatcacgtaattacagggcaacacattaagttctcgtagaagctccttctcattcccttcaagactacagaccat  
tcagatggatcctttgagaaaagccatcgtcgtatcgtacttattcagagttctcgtcgtctgtatttgggtcacaagcaaggagaaaacctg  
gaagtcgtcgtcttctaccaagcagctaccgatgctcaatccgaagacgcttcaaaagcaccacggcgacctgtacaagtcgacgatctcac  
aacttctgatacttgtaaggcttacctatcacacaaatgaaagcagattgatcatgtaaatagctatttctcaaatcatatctaggcgaatat  
cagcagcatccagaaactcataatcgttcaaaaaaccattctgctgatcatgtaaacatagatgatattgacctacaagtgcatatgctatta  
gtccaggtgacactactacagctgaacctcctcagcttaatacgcctattcacttaagccgtccccgttcaatctaggtatagttcaacaagc  
tttctttcaggcaagaggcctttgtacagacgaaactttggtcactcctcctggatcggcctcatctactgctgaaaacgagatctaaatcca  
ttcgataatctaaagttaatggctatttctcgcactcttttagttaaagaacctcgtattgtcaccgcaaccgaaggatagttcttggctccttt

actccggacattgatacaciaaattgccagcatcatgagcccagaagacgtgaagatagcttccgagtcacgtgacagcattagttttactttt  
caaatagtgaggatcctttgatggagaggattccgatctggaatccgaaacttaacgcataattgggggcaatctgctctcttttccatcctc  
atcgataatgatttgatgactaatcctaagaacaaagaacgctttgaatggcaatatatgctgaattctgttctcacgagtgatattgtgaaaatg  
aaaaactcgtcttcgaaaaatagcctcttcacgaaaggatgatgatagcaattattctgagcagttatgggttagaaataggtgtggttaacac  
accgctctattgatcaccaaaaagaaaacttaaaatacatgctggtgggtgatgatagattactattagcaatactgaattttcgttgggaagagg  
atcaccaagataccgatagaggctgttgatcgattactgaacaaactagagaatatgaaaggctgtatccgtcacggagggtataacttgca  
gatcatagtctttatgcttctgagtcatttcagcgtaaactagatgcttactgcttacttaatagatacatgattgctattacaaccaacatt  
ttacggaatgggttggaatgatgatctggatataaccgaaaaaaactcattatcgaaacattcagcaaaaactcagacggctcctttgtg  
gaacgctgtgccgtgaatgaggattgattcgttcatttgagattaagatcatggttaacttgaacaataaccttacaagggttgtaataccttgat  
aactaccgtgaagagttaaaccaatgcaatctgcctcgttatgggatgagatattgctgttggtatcgtttccatcaaagctaataaaagaat  
ctatgtttacgcatgctgatgctgagagtataactaaactgctccgtttactatagactctcttctttatgaccttcgagcgaatgagcttagct  
gttgacattatgcaacaacatgctgttctgtgatcaaatgcaatgatcaatgacttcagataaaagttaggctttaaagatgattctggtgct  
atcgctcaaagatatttcgaccttttaaacgaaaagtaaacagagggtgctttacattgctttaaagaacagaagtttggaagacgaatg  
ggacttttatcgagcatatgctctttattcaaatggatatacaactatgacgaagaatctgaccagtttgtgagtgataactagttatatta  
atcagttactgaaatgatcaactagaagaacaagtttaacagacccgggaatgattacttctttacatacgaacgcttgattctgtcaggatac  
gcttcagaaagttatgaattatgctcgaaccctaaagtctgtatggaaaattcaagttagatgttatacgtgacgatgattgccaatctgat  
tcaacggctctgtgaatcaaatcacgttctgacttatactgcaagtattgaacatgaagggtcatatgtcatcgttctgggagcgttgagaact  
ccgaacgtgttacgagatgttctgtctatgaccttaacagaatcgctccaatacagagggatgattccatgtgattgactctccccaatac  
ttcatctattggacgggagctgtgatggattggatgtcccgaagttccatctatggctcctaactcgtgaagggtggttactgcggttactgg  
agagcagctggttggctcaggagttatcagtgagttgggtggtgataccatcagtttagaaaacccttcaaagcgaattcttccctgtcaat  
aaagaatgacgaggacaaaaaacgctcttaagttagcattatccttactgtatgctattcaattaatccgcactgcttatcagcgctaac  
tgtcaaaatgtgattcattattcttttcatatgctatcgaattgcaaacgtttaatgagactttctatttagaccctcaagatgggaccaataa  
gaagaaggatgattatgctagctattagttgggtgggtttatattatgatgattgctccccactgaccgaaatacttccgatggactgtaacagc  
gttggagtttgaatgattatgacctacgggtcaaatatattaatgattgacagaaaggcattgaagaattaagagacaaggctcgaaagtga  
tggctcttctgtttacactttgatgaaatgggttccatcaataatgtggagaatccgggagtagagattccttccgtttaaactaggcataatccg  
agacaaataaggtttaaggatgaagagggtagtagctttatgaaagaagggttatgcaacatatcgccgaactgaagctcgtcgcaggggagc  
tttaactcgttcacagtttaattgggcgtgttttagatgataccagtgaggaaaatagattactaaaggaactgcttctgcaaaatcaatataac  
aattcgatggcaacaaggcaggttatcggtactggttcttttggtactgtttatcgagctgtgaacttagaactggcgatttaattggcagtaaag  
acagttgctcttataagccacggattcaagatcattaataaaaggatgaagggtgaatgattgttttgaattacttgatcatcccaacattgt  
atgttactatggtatagaggttcatcgtgagaagattaatataatattatggagctataccaagggtcaacccttctgagttttacgttatggaaga  
atagaggacgaactggttattcaagttatgcttgcattactggaaggatgaacttatatacactcatgtggtgttttccaccgagatgtcaaac  
ccgaaaatattctgtttgaccacaatggtgtcatgaaattactgatttcggatcagcaagatatcagtcctaccgcatcgagaattatgagca  
attgactctacaagaaaaagaagaatatgaaaagagtttctgagaatcctgtgatcaaaatttcaccgagataatgctattactggttagtcc  
tatgtatatggcacctgaactactgcttgggtacggatacggataaagtaggtgctgagtgacatattggtcgttaggtgtgtcattgtggaatggct  
actggttcgctccttggccaaaagttgataatcgcttttcgctcatgtttcatattgcgactttaaactcctccattatacctcaagatgatcagta  
tctctatgggcaaaaatttctcaagcagcttctgttacagatccagaacagcgggctacggctacggactgttgatggatccctgggttatg  
cactcagagtggttacagaattgatctagtaataataaccaccaagtcgaaccaggagacgtactccaatagtgaacgccgatagagctatg  
aaaacagcagagaaagaaaacagtttccgatttcttaattctatgactacaccgaacaacgctccgctaatttaattgtatgtacgctaatt  
ttgaatacctccagttatgttttgggtcaatttattgagcttttttgggttaataatgtttctatacacaatagaatattcatgaactaaatgcta  
acatatgttgaatattattatttctttagttaaaaagtttgaagttaggcttcaacgtagtaacttgagaacagtaagtactttacacgct  
ttaaaccctaacaacggatttttagcatcattgataatgatagttcttaccattgacataataataactactacaattcatttactcattttaa  
gggaaactccaaagggttatgatcgcaaatgttttagagaaatacaatgaagtgaatccaatgtatcttattctagttattttcaacctta  
accagtaactttataataacaattacaacagaaactaattcgttgattttactgagaaaggatcggatcaccagcgtccatgattgcaaga  
acaccaacacggaaaagacgaccagaggcgttacctaaatcaatgctaaagcaagtttagcatgttacaattcgactcccacttaagatcttt  
gtcgaatagaaatattgacaaaaattcactgatattctttaggttagcatgaagctgagattgacttaattttcaaaagggttcatatgtttc  
agtgttctgtttagttggttcaaaacaacccaaaatttctagtttctcatgcacacataaccctccagaaagaatctcactgttaagttaaaa  
acttactttgagcattgtaattggtgaacagagcacttgtaagcatagcataatattccaactcagacttgcaagagcaggtgtgttgcggca  
agaagaatgagtttagcctttccagagcgaagagccttcaaggtagactgtatccaagacatatttaccactttcatagtcaaaagccaacta



gagttgatagtaccagacttcttggctcttgggtgaggctaaccgcttgagcggttgaggagcttgaggagcagacattttgtatTTTTATA  
TTGTTGTATTGAAGACTGAATCCAATTACAAAATCTCAATTTTTCCAGCAGCACGCTGTGGAAAAATCATATTAGAGTGTTTTTGGTGCAAATG  
TAGTCTCAAAATCAGTCAACAACCTACCCTAATGCTTCATTCCAAGGATGATAACGAAGGAATTCACCCTGCAGCAGTTCGTTAAAGTGTA  
ACAAACATAAAGTAAACAATGGACGGTTTTACTGGATTCTGAAAACTGCAGTACAGTGAATGAATGAATGCTATAGTTTTATATA  
ATATTGATTCAATCTCTAACGATACAAAAAGAATCGAATACCTCACAATTTTTACATTGAACATCATATGTATGGTCATACAGTGAAGGACT  
TCATTGCTATTTCAAACGTCGCGAAAACAAGCATAGAAAAGTAATGTTTTTTTTCTTTCTTTCTGTTGTCGTCGCTGTAAGAAAAATTTCT  
GAGCTGAGATAGCTTGGGTTTCAATTATAACAATCCACCTTCCACAATCAATTGAGAAGCTGCGTTTTGCTTTAAATGACTAAGTATTGAGGT  
TCGTACCTGCAAATGTCTATGACTCCCTTTAAATGCAATAGGAAGGATTAGGGCGGTACAAAATTCATTCTATCGACATTATAGTACTTCAA  
AGTTTTCTTTCAATTTAGAAAACCTAAGTATCTCCAGCATTGAGAGGATTTTAAAATTCGTTCTTGGGCTGAAAATATAATCTCCTAAGTATCAGT  
CGGTTTCCCTAAACGCTCAATACAAAGTCTAGGAGGTTTTGATATTCTAGTTTTATATTAGTCTATTTCTCAATCATTGAGCTGTTATTTAAA  
CTGTTTTGCTGACATTGAGGTTCTTTCCAGAAAAGACTATTGGAAGGATTGATTAATGTTTTCATTTTTATGAAGATTTGTTGCTCTAAAATA  
GCTAAAGAATCATTGGTATCTCATACTATAATAACAATCCAGGAAACAAAAGGAAAGATGCGCATGGACGAGTCTATAGTCGCTGTATG  
ACACAGTGTGTGAGATACCTATGGGCGAGTTGTACATATAGTCAAATGCCAAATCATTGAAGCACCAACATATTCTCGACATGAGGACAGG  
CTTTGAAATCCTGCATCTGAATCCACGTCCTCATGGCATCGTGAATCAACAGCCGTTGGATGCAATTCAAAACGCGATCGGCCTAGCGGTGAAC  
GAAACCAGAAGGATCGTCTGAAGAAGAAGGAGTTGAAGTTGGCAAACAGTATGGGTGAATAACAAGGTTAGTTAAAAGATTATTTGGCAA  
CCAGTGGCCCCTACCATCTTCAATGATGCCTAATCATCACTTCCAAAGGACAAGAAATATAGATTCGGCCAAATCTTTTATTGTCCATGTGCC  
CTCGCTACTTTACTTTATTCTATTCCATTTACATGTATACAGTTAGGATCCTTAAAACATGGGTTCACTTCTTTAGCAAATATTAATAACATA  
ATAGTACAAACATCATTGTGAATTTCTGATCGTCAAATCTCACTGCAGCTTCAACATTTCCCATATCTTCTGTCATGATCCACACTAAGTAGTA  
GAGCTTCCAGGTTGTCTAGTCCACTGGGAATACGAACCGATGTGAGAGTTGATTTCTTGGTCAACTTCTATAGCGGCATCCGAATTAACCTCTG  
GGACGCTTTTCTGTTGCTTTTAGGGACAGACGAATTTGTCCAAAAGTACTTCTTGAACAACAAGTAAATCTTTCTAGATAATCAATATC  
ATTTCTACAGGAACGACAATGCTCGTACCAATGAATGAACCAAGTCTCTGAAAAACATGCTCCGATTCGAACAATGGGATGAAGCGTAT  
CAAGACCCATTACAACAAGTATCCATCGGCTGAATCCACTGACGAATCTTGAAGTAAAAATAATGTTTTCAAACCTCTTCTGTCATCTCT  
CCCTTCTTACTACTCATGACTTGGCAAACGTGTTGACATAATCTCGAGCAATCTTCAAAACGTTAGGACGATGTTCTGTATTGCTGCTGATGG  
ATGGGCTAATGGGCTGTCTGGATTGGGTTCAATCAAGAGATGAATCACTTGTCAAGGATACTCCTTAGCTTCACTAGGCTTGAAGGCTGGGG  
TCTTAATAGGCAACAAAATATCCCTTCTGAATCAAAGTAAATTCGTTAGCTTCTACCACAAAATAGACAATCCACATTTGCTGCTCTCT  
TGCAGCTGCAACTCGTTAAGCAGATTCTATCGACCGTAATTTTCAAGCGTAAGCTGAAGAACACTTCAAAGAAACAGAAAATAAGAGTAGGT  
AAATGAAAGGACTCACATTGGGATGATAGATTCTAGTTGTAATGAGCAGTTGGAGGTTGAAACGGGTAATCAGGACGAAACGTTAATGTA  
ATAAACGTTCTCCAACGTAACAGAAATCGTAGGCTTACAACGTACAATCCACTGGAAAAGATTGCTGTTGCCAAAGAACAGCGTAAGT  
TGGGAATAGGATTTCTGTAAGTCTGCAAAATCCTATAGCATAAGTTGCAACTACATATATCCAATTTTTCTTTTATAGTTCTCACTAATCAC  
ACATACTTTGTTGATTTCTGTACTTGTCTGATGAGGGAGATGCTATTGTTAAAGGCAAATTCATTGATGTCAAGGAATACTTAAAATATTT  
TTAAGCAAACACTAGTGAAGAGAATGTTTTACTTCTATACGGAAGCTTGAATTTATCATTCTTCTGCTAGGCTTCAACACCAAATTTCTCGC  
TTGGTAGTGCATTTCACTTACATAGCGATTGTTTACATCGAAAGTGTGTGAGTTGTCAAGAAGGAATTTCAATTTCACAATTAATGACACTT  
GAATCACTTGGTTCATAGTATTCTGAATCAAGTTACCTTAGGCGATTGGTTGCTTAAACAAACGTTGACACTGTATATGGAAGATGAA  
GTAGTCGAGCCGATCGTACCCTGTTCAAATCAATCAACTATCACGCCTCTTTCGTCAGTTTTCCCTGGGTAAGATGACCTTTTATTG  
ACATAACAAAAATAGACCTGATCTTCAATGGACAACAATACTATGATCCCCCTATCGCTATTTTCACTCTGCCGTAGGTAATTCAGG  
ACTCTACTCTTTATTGGACTGTTTTCTCAGAAGTATGTTGCTGTTAACAATCCATACTTGAACAAAACCTTCCGAGAACAACGCTGTAGT  
ACTAATTCATTGACTCATATCCGCTGATGTTCTGTAACATAGGTTAACAACAAAACGCTAAGCTGAAATCATTACAACATGAACAAC  
TGCTGAAGGTAAGTAGCCAGATTTGATTAATCCATAAAGTAGTACTTCTAGGTTCTCTTTGAGGACTGTTCTCTTGCATTCTAGCTGAT  
TGTTCGATCTGTGGAAGCGAGTACTTCCGAGAAACTGGCTTTCGAAGTACCCTTTCGAATTTAGTTTCTGTCAATTACGTTAGTATGGCTTGGTT  
CTTCTCATCTCTTCTCTTTCTTTCTTTTGCATCTCCCATGGTTGTAGAACATTATATTGATGATCGTCATTGGCATATTAAGCCATTCTCA  
GGCGAACGAGAAACGCCCTTGTGTTCTTTCTTAAACATAAAGCAAACCAAATTTCAAGCTTATGAGAAATTTGCTTCTCCACGATC  
GGTTGTTACTAACTGAGCGGATCAACAAACATATGACCATAAACAATAAATCCGTTTTTAGCAACCCAGCAAACAGAAAAGAACA  
TAAATAGTTTACATATAAAAAAATGTTCTTTTCTAAGTGGATTAAGTTCAATAAATCATTATAAATAAATTTATAGTGTACAAAAAT  
GAGCGATTATAAAGAACGCCGAATGATAAATTTATAAACATAAACCTAAAAGAAGGATTGTTTTAAATTCAGAAGCTCAAGCTTAAC  
CAGGAAGAAAATGATGCTTCAACTCATGCTTCAATCTTCTGCTGGGCTATTGCTTGAATCCATTCCGCTAAAGTTGAAG  
CGTGCCATTTCTCAACTCTGAATCTTTTCCATAGCCGTTGCATACGATTAGCATCTTACATACAAAAAGAACCTTCTTATTATGTACG  
AGCATTATTGAACATCGTACAAAAGTCAAGAACCTTGCATCCAACGACTTATAGTAAGTCCATAATATGTTTTCTTACTATCAAGTGAATA  
GGAGTTTTGATAAATGAGTAGTGTGGTGAAGTTTCTTACTAGGAACCTTAAAAACATGCTGTTATGGGTCTACCATGCTGCTTTTAGCTCA

taggcagcgttataaatctcaagacagatacgcgaagaagagatctatgttcggtacttaacgtatcaggtgcaggaccccgttccggttggg  
cttccatccattccaagtggatgggttctcaaccgactggagtccggttgggtctgccacgagttggcttaactctggttccatttccatttc  
ggaagccactgagcatcttaacagtttctcatatactacaggaacacgactctagcaccagctccaattctcaatatgttgctgctcctctt  
cagcttcaaccgggttcttctgtgataaaactcaggaagttcctccacctgaataagtcgatctttctccttgcttttccgtaagggctattctctt  
ttcctcctttgtcatatttctatagatttccagctcttgatcactacgcgccagtaattcatttagttcatctgctccaattctccttttcatcattatg  
ttcctctccatttctgtttccaacaaagatcgcaaaaatgcttcttttcttggagtagatttattatcaaatttaccagcttgaataacttttccgt  
caatatctagttgtattgagcgcgagaaagaatgttttcttctacagatttttctgtaataagcctataaattctaacttcttctgtttgtccaattcg  
gtgagcacgatcttgacttcaagtcttgatgaggattccagctgtaatacaaaaataattactgtgacgactctgaagattcaatcctaaacc  
acctgctcgagactcagcaaaaatatattaatttctgcccgtagggtcattaatacacccaaaagcttagatcgatcatctgcttttgttgagcca  
tcagacgtaagtaacggaaatgtcgataatgtaggtaattctcatgatgttcataatttgtgtcatttgaaaaacatgaggacacgatgcct  
acacggaacaatttgggaagaactctatctaataactcaaatccgggacactctccataacatacataaatttagacctgtgggacgattgac  
cgttcaacatcttcaatacataaggatgattgcaaatcttcttaactgcattacaggttctgaagaccctttatacctgctcttcttatttgc  
cttcaacgaataaaataccatgcttcttcttcttctgatacaattttgtgtaaccagacatctgacagcgaattaccttctcaactttatccgga  
agctcagattcaacgtctttttcaaacgacgaagcaaaaatggacgcaataactttatgtaaacttaattaccaaaaagatttcttctcggtta  
actcgactttatcttgggttccagtagcaaacggagtataaacctcatcaaaacttttgacagaattgaaaattttggaagaacgaagtt  
aagcaatgccagagctcaggaagattgtttgaggtgttctgtcaaaaataagacggtagcagaagaatagtagctgctcaacgtgctag  
tcaattttgactgggtattttcattcgatgtccttctgataatcatataaaacccttaatacactaagtagtaccggtctatcttctgatgacgtattc  
aaaagtggtaacagaacttgaaaattcgaatgacgaacttgggttgcgaagcctacggaccaacggcggtctttgtacacaattttgaga  
tagacggggcccaacgttcaaacctcatagcccagtttagtttagtagataaaggaacgatgatcaggaagggccattttgcccgttcttctcaa  
tcaagtgagtgaccagagaaatagctgtaagtttaccagaccatttcatcagctaggataaccatttaaatggttattatacaaggatatcat  
ccattgaagtcggaagctggtactcttttagcttaccaccaaccagtagatggttgatcagtaataacttctgaaatattatgagcaacattat  
aataatcaacttctgttccggttgcgggtgagagaacgatcaaaatcttctgctgaagtagtatcacctgtttagattgttgaccttgactgca  
ttagccaatgaatcaataatgatcgggttctgaagaagatgagtaattctggtatcctttgctgacatcaatttaagtaagcttctcatc  
atcttctcaaacgctgcaatctctgtttgacgttgcacgcttcttcttcttctctgatatgagaatggatgccaagacagcagcagatt  
gcttctgagccctagcctgagcatttttagttcagcagcaggtcacgctcatgagaacaaatattttgtaataatcgattggcgttcttctgt  
ctgcttctcggtcgtactgttctgttctaaagcctcagtagggcagtagcctgggtgcaggttaggaagcttgaagctatgcatctg  
ctgtattcaaaagaacgcgggtatacgggttgaatgtcgatctgtgcatgtaaaagccttctgtcttgcgaagccgcaacattttagttctagc  
aaagcgttctttctgtagagtgtactgtcgcacttttgatcttgcgaagaaatgcaagctaggatatacttcaatagccgctgacatgcttcc  
caactcatgtatccgttctgtaaacgcaatgaatgacctcgtcctgcacctttctgttatgtgcctgaattatgcccgttaggataacggctgca  
ggtattcagctctccaaaatgagatcactttttgacttgcgatagattcgtcggcaccgaatcttcaaatcactcagcttctgttctgctttt  
cttctctctgctcaataaactttgaataacttattgcccacacagggcaaatcagtgacaaatgacgatatttttccatctcttcaaaaattt  
ctttccagttctcattgatagaacatgcataattgttttaataaagcttagccttttttcttctatgtttcttgcacattccttaattcatcaca  
aacttgcgcaaacgagattattccgttccgtagcactgttcttcaattttctcatttcccaaacattcttctgatacacttctactatactct  
tctcaaaaatgcccgtgtaaaacaaaattacacttcaacatataagaaacgcggattcctagttccttttgggttagtttccagaaaatt  
aaagcaacaattctgtaggcttagaacgctaatttctgactcttgcgaatcgttaaatttctgagtttgggtgtaccataatgtctctggt  
acgcatggtggtggtctagcatattgcaacgatcgcggttaacattgataaagatgtgggtatattgtctgaaatgacgataacgagagatagata  
tttcgacggtgataaaccaacttcttagatggaattgtaagtaaaagttagatatttcaaccggtgcttttattcaaaaatgcttttattctatt  
attattattaccatattttgctatctttttatgaatgctggatataattgcatgtatactcaaaaccagatttgaagttactttcacttctgac  
ttgtctcactgtcttaccattaagcatcatcgagataaaaataaagattgatataattgtgtaatttctcaaaaattatattcgtttaccaaa  
tcaaaccttccaattaaatatacaacacttttaagccatttagacatataaggtccctcaactcgaaccagtttacgataaacttgcgtac  
accgacaccggaattactcaacttttactgcatgttcttcaagcagctatccgttcagcttctccagtaacaacgtaccgaatccttgatgtt  
gaaacttcttggatcacgactatgaagaggaaccgactaccatatacgtgtagctcacgaaccaatgaagttggttgtgaattgagttccggac  
gatattgttctcagagcattttcgaagacgaagtaagccaatcaaaaatcttctgtaggatcttcatatgacaaaaatgttcccaacctcgtt  
agcagtgtaatcacgacgaagcaactcttcttccggatgaatctttagatgaacttctgaatcaaacctcagctgcagcaatcacggca  
tttggtagccaaatcttctacagattcaatgtaactcagaaggtaccagctcaacaccagaactgacaaaggcatagggatattctcgtg  
aatacgataaattctgtccaggaggacaagagccaaaatcagcaattaaatcaacaaagcattaggggtataattcttatagcgaccg  
gtttccataattcataaagctctgtgccacggataacgagagtcggatagagtttcaaacctcagtagcaaaaggctgggtttcgaagattctt  
ggaactggaaaatcacgcttccataccaacgttggaaagatcaggcatcatgtgagttactcttgaaccgcatcttctgctgctgaaatgt

ctcacaacagcctttactgtatggccacgatttgtgtctcgagcaacatcttcatacacactttgaacacccacttcaagacgagtgacgccgta  
acgaagcatttcatcaagggtgttggtccaggcagtagtccggctgtgtttctatagtatacctacacattttgtttctgattgttcagagaaacgaa  
ctgcctcatccacatctccgtagtagcacctgacaacgcattatgaaggttgcaataaaatgatggcgatagattccggcaaagacatgaac  
gtaccacccatgataatgtattgactttgtcaacattatgcccaagagaacgtaattgtctacacgtcctctgttgcataaggatcataacg  
cgcgcggatagcccgcatactagttggctcataaccggtatacattgctgcgagtagtcaaaatcagaatctggctcctctgggcaataaacac  
atacgttaccgtcattgcaatatgggggcatctatggggcttacacattacagctacgactgcaataaccggatgccgttctgactggcttcgccg  
tagctttctcatcaatgaatctttcaggtatgcatcagggggaattgcagcaataatcagttaacctaggggactcaggcaattgatgcttttc  
gaaattctcatctcaaggcattcaagttgataaccttgtttgattctcagaggcaattagctctgcaacaatttctgtcatgctttcgcttgaga  
aaggccagattcgaagtagacatcttctttctatttttaaatgaatcacctccacaatggaggatagggtgaattatcaaattgagaaccgga  
taggctaaggacatgtcaaactaggatgcttgattttatccttggcatcggagcaggatgctaaactataatgatacgttaaagtacttatc  
ttaagttacgcatccttgcgtatcggtatcttctgttgtgtgaatttagcagctatggattcatcaacaatacactactacttcttgcctttttt  
ataattgactttgtttgtataattaacttagaaaaaaattaccaattagtcttgcagctcttggatttggctcgtctgttaaatacaca  
acaattcactgtaacgattgctcgtctacttataatttctgatggattccccttataacagccattatagaccattttcgttggttagttctct  
gtgaagacaatggtgaaatacaattggaagaataggatcagatgaatttcagaatatacgaaaacgtactactgaaccagaggcttgatt  
atcagaagaagaagctgcttatacaccctataaagttaaatgcaagggagcttgattgactatagccgaaatcctctcattggggctttt  
aaattttctgttgtgtttcccaatatagggcgtcttggaaccagtcagccatgtgggattgatgacatagaatatgtggaagtaattgacaaa  
aaggcaatagctccatagagaaggtttataaacgatcattcaaggaaacaatcccaacctcaaatgcacaattaccagtactaaaatccatccc  
atgtttcaattataaaagttgaaagctttattgaaatgtggaacggtagaatgggtcatgctttcatcggaggctcatgctttcagttgatgcatc  
tcaactaaattattcaattggggctcaatacacaacagttccaatcttagacagacttatgggcaaaatttataaaattagagggaaaaaag  
cataatgctcatccttatacatgaggtagtattaacgtttgatttgcgtatattgcagtagtaatacttcttttagttttgcatccttttatattt  
cagctgtttccatcgttctatggctccttgacaattttttctattctgttattttatgatttgcgtatgtagcatatacttcttataaagaat  
caaaagattctgacgctcgtgtacattccataatggcgagtcagatacattacagttattcgcgataaaagaagaacaagtgtgtggagat  
gaattgtaaccggcgatcttatagcttgacaaatgacgaacgcaaaactggccagttgatggcttagtactttccggtagttgtttgtagacg  
aaagcatgttgacaggtgaatcagtagctgtaacaagtagctcttgaagaattatctttagattccttcataaaaaatgcttttaacgtttttcat  
cccagtagtctcatgctggaacaaattctacaagtgaatagcagttggaatgcttctgctatgtaattactattcgaacgggggtttctccagg  
agaggaaagtaattcgagattactgtaccctaaatgagggatcacaaatatacaaaagattcgatgcttttctaaagtaattgattatcttctc  
tctttttctgtctttttctatccctatacctattcaagtataatgctcctttcagtcataataattatcgatcactagatgtcattaccatttaattcct  
ccagcattacctgctactctttctatcggaattgcaaatgctgtttatagactctctcaaggatgcatctttacgtcaaatccagaatggaattca  
ttataaactcgtctgccatttttactaattttacaagcatatccacggctggcaatatagatactttcgttttgacaaaactggcactatcaccga  
agaaaatgtcaattgtctactcttatgttaaagatacacagaataattggaagttgctcaaatgctcacaattttcaatgcaaaagacactt  
atctcaaacattagcacttctgccaatctttacaaattgtggatggaacattataggtgatcctttagaatagcattgtttaattttcaacgg  
aaggtttataaattcgtttgaattaatgtacgtccgcgagatgccttatttactgtcatgaatgggaaagacggccaagaaattgcctatagttt  
acgcggctgtagagtttgcctgttttaagaagaatgtccgtcattgtctgcgcaataataaaaaaaccaatgctcttttcaaaagggtgcgc  
ctgaatcaattttggatatttgttctcagggacaattccaaataacctttatcattatagagatactttcgttcaagggttttagaatactagcat  
gtgcttgaaaacctcctcaaaagtgaacagattgcaacagatctcgtggatcattagaagggttagttttcgaaggattactagctttgga  
aagtaaaataaaaaaagaatcagtaatgtgatgaatgtccttaacaaagcaaacatgcacattgccgtatgctcaggcgacagtttatggacg  
agtgtgtatgtcgctagacagctggcgttttggctccttcttctgtttatgtggaagatagcgaagaaaagtagagcttattcgatctactgac  
gacgaagtaaaagttcaagttatacaatgttaaagaggattgctatttactactgcaaaacatacagcctttgattatataactaagcgatgaaaac  
tcagctatagcgataactggaggattattgcgaaaaatcactgaaagtttggcgaagaaaaactgagaagtataataaagaagacaaaagttt  
tagccggatgtgccgtctgaaaaatccaaatcagctcagcctttgtagagtttcaagtaacgttggattttgtggtgatggagcaaacgatt  
gtttagctctcagacgttctgatgtgagcgttcattgtcggatactgaagcttctgtctgctcatcattcataagccaaaaaaatccgttttggat  
attatagcaataatgctagaaggaaggttccattgtcaccagctatcgttgtttcaatataatggtgatgagcgcgataatcaattttcaggaa  
caattctttgtatttaaggaattataatcaaatgactctcagtttctattatggatttagcaatcgttttccctttgtcggctgcaatgagccattc  
gcaccaagtataatctccaacgcaccttctcactttatttaaaaaccaagcttattcctcttgggattactgtcaggagtggtttatc  
gtcacaatggttactggatgtctcctgttaaagcttgattcaacttcttccaacatggcaagccgggaaatcaatacagaaaaatgcattagt  
gtcttctcttttctattaactgcctacagatgttggagtgaaatcttatcaaaatcggaatctgagttcctttcacctatatggaaaaacagtga  
gtaaatgcatgtgatactttcaattataacaatttttttagagctttacgtttcttctataaattatcgggggtgtttgccttttcatatgctttta  
aacaatcaacattgggtgtcaaaagcttacacattgtttcattacctatcctatcggttcatcatcgtattgttgggtacaattccgtttttagttg

tttatttattctataataaatggaaaaggtcctcattcaagaaagtttaactgttaaataagaaatgcattcaaaactccatatataaccagtaat  
atgtgttttaactgggattactctcataatcgatttttatgccacttttaagcagctagagcttcttctcaagatgttgattccccatattgaa  
cgggagggtgtccagagctggagaatgttcttcagcagcagtagctaaagtccagttgtaattaggacaccaatccatatcaatggtacagga  
ggtgtggccgcatgcatgaacaggagttcgggtggccatctgagcttcttcagcggactgatcctcaccgatacgcgaaagatcccaaatta  
aagttcttctatcgagagatgtagaaaccagcacgggttctcatgaggagaaaattgatattgtaacatggtcctcgtgcttcaagtgtgta  
caagcggttattaagattccggagatcccaaagggaatcgttttatctgctgagcaagtagccataataaagtcattgtgaggattgaaggcga  
gtgcattcacatccgaagaatgcgcatggatgctttcaagggttgtgaaatagctggacgtctgctgcatgaaggtaagatgttgatcgcc  
agagacagaagcaaaaatctgcatgtttaaaatggtatttgacatcattaacaggttttcatgtgtagacacttgagcttttaacgcagaaga  
aggattgccttcatgtaacgctcaatgtcccaatgacagatgctggaatctcgagaggccgaaaccatttgccttgtttcatatagttccagcac  
aaagcgtacagggtgaagctgtgcttttgagtttcatggcaggttgaattgggaattcacctgaaggattgaagagttaaaagatgatccgtta  
aacactaaaatcattgtggctattcccaatagtagcaacgtggctcgtcctgaggcataattgttggccgctgactgattctggatgagagt  
aaagttggcggacttgactcgaagagacgttctgttcatcctttccatagtagtaggattgtatttgatttaggtaaggtagttgaatgcc  
gcaattgcaaggtagattttccagcgtcagcacggacacctaacgcatatgttccgtatatacgaattcaggaaacctttgtaaacgggt  
agctagcttcttagtaaagcttagcctaagcttcaatagactcacatttgttctggataccactgaagagacatacatggccattccaaagct  
ctcgtataatcaaatcacaacaaaaggagagttttttccaaatttatattctagctgtaaacctctgccacgtaacacgcactcgcata  
catggtgcatcccaattcgtcaaaccataccttcaataacatttttctgattaattgcttctcagaagcttgacactgctggcagactgagcag  
tagtacttacagccattaagtttctttattgaattattggctcttggaagtgcgctcctcactgtaaacgaagaacaatctaggtaaac  
ctacatagctagcactgtatgctatttttgagtaattatttattttgcaaagaagaaaaaatctttcagatgggtgacttttgatctgacg  
agaaaacataatggaattctataaataattcaagccaagttcaaagcggctcatctagtaaacatgaaagattaatgattcatgaaaagaaaa  
ggtttatgctagttcttctctgtccacctgtcagatggactaccttttccaggcattaaggttctctctgctacacggacgaatacctccaaca  
tggtattacaaggatctttatgaatattcttcttaggtttacgcaaattgaatctggcaaattgacagtagttaaactcaataactacat  
gtcttcgaaaccgggtatgctacttttcatgacaacaacatattaagcagaatgctatgctatgttatgccatacaatattatactataccatg  
gtgctcattcaagaagagctcgacattgaccactagacagacttattctcgaactaaaaggctgccagctggtctctgcaaaattcgc  
caggcagacaatgaaaattccaatcactttgtgtcgtgctgcgaaatgactagttaaagatgagatctacagaaaccgattgcctatatgattaa  
aactatcatgctgagctactagaggtgcaattaccattccatttctgattcaaaaacgatacttcaaaaatttaattctctcaagcagtaggacct  
cgatgttagttcatgcccttcagttcatttagtacactgaaaacttctagtgctgataacatttctgttgacacctttattatagttcatgtttta  
aatcaattgcttaattttcttttctgccaagctattctgttccggagcctgtattaattgaatgtttatgttcatgacgtttcatccttcaca  
cctactgccacgatttctactaccagctagtagtcaatttttaagcgtcaacgatgaatttttccatcctcaattttttcttctttttcact  
agctcaattttatgtaatctgctcgttctgacgtgtccgagtacgaatcgcttcaactaaattatcgtcaaatcttactggaagttctctt  
ggttagccgctggtttgactgtgaaattcggctcagctcttctgtagctgttcgagcgttcttctactatagctgtaagaaatccttcaact  
taggggaacctataagagttatggatcgattcctttccctaagtaaagtacataatacacgaaactaattatcatttagtacatcaatacaaaa  
ggcctcatccgaattaactggtctcaaatcaaaaaagatttatcgccaacagaaactatggagaccttagtactcaagttcagaccattta  
ccagctcagtcgacgttcagactattcgaactgggcttaacaaatccttgccttaaatcagtttcttccagcttctacgttggtctatcatcag  
cttgatctatttctcatgacctggaatttacgtcctatccttttatggtttatgttgtaaaatgaatcaccttcaataatgaactttttttcatt  
cattattcataccattaatattgacaaagacattctaaaagcagatgaagaataagatggccactcgtttaccaagtaatgaacattttaca  
tggttttgcagacacaaaacaaatcgttatgcaaaacagatcgggccattttacttcaacgaacaatgatatttacttgattgatgattcat  
aatataaatcgaagattattatgattcgtgtcattttctgactacatccatgtgtatagataatgtagatacggttttgagagaaaaacctagt  
acacatctcaattcaagtaaaaaaacctttctcaagaaaaagaaataatgtctataaataaactgagtagcatcaagatcattgtgtattcc  
ccaacaatggacaatacaaaaataatgtctgtgacaaaatcgaattggcaaaaagacatttatgcattaacatataaacaatagaataat  
aataagatagagtgattgcaaggaatcaaaaaaggggacagctatattggcaatactaggattaaaaacattttataagccagcggcaca  
tactcacatagcttaatggaacgaaccattcacttttcatgattgcttgcgtgcaagcgataaccaggattaggatggagaatattataaga  
gtgttcgacaccgacgcttcaacatttcaataggttctgactcactctcattcttctatccatcaaaacttagcataaaattcatcttacttt  
tctttgcaactgcataaatgtctaccagtgccgattgcatataaataacaccacaagccatacgtccacagcagtggttcaaacctctttc  
tgtatattctcgggtcaatataaggagcagaaccgagaggccacaggtcatgtgtgcttctttccatgccattcggagcactcaccatta  
ccaaagtcaatattgatactccgttaattggtaagcaacagattttctggttttagatcccgatgagcaacacccatcatgaagataatcaa  
caccacgcatgagctgtgagaagcaatcagcttcataggttcaagctcagcagccataataaagtgtaacaatcaccgccaagaaca  
gagttccataacttcaataatctcctttgttgcctgaattaagtctaattgatgaatgacattaggatggcgtagagacgaagagatacaaaa  
ttccgaagtaagacgtttgttatatttctttgtgactctgacggctccgacgaaattctttgacagcatatagcaattcagatctagaattctgtgg

atcaactttgtcgatatacgtacaacgccaaatgcgccagcgcaatgacctcttgacagcggcctacttcaacaagctagcagacacttt  
gccgggctcttttatctgcaagcttctctgccatagccgttgatccaagattgaaccaagctaagctggctggtggaatcagctgccgttctt  
tagcagcagccttctcagccttctgtgttccagcaagaaagccttaacatcttgccaactttctggcgttagcggggcgaagacga  
tgggatgactaccatcatcgatatacagtaaaacgagaaggcttcgagtttgatttgcgctggaagagctgttgggaacggcagatgccccagct  
tactaccatttgtgctgtttgttctcggtattagatttccagaaggttgttttattattctgtcgattaacggaagactgagagaaaatgcgtt  
gtaatctagaaaactggattttcgaaggagtcgagttgtagaaataggagttggagctgagcagaggagcaggcgcaggcgcagaagtattatt  
cgcggtgtaccattcgggttgggtggagctgctgccgtagacttggaggagtttgaagaagaattcgtcgggagactgaggcagaagaag  
ctggagtcacgatcggcgaatgagcggcgtagctgaggcttgaatgagatacacctaacataaaaagaagcaggtgcacgggaaggcttagt  
tgggggaggcatggcggcttggcttggatttacttgggatatacggaggcttggaggatgagctgggctgtgtcctaccgctcctgttctgttt  
ctgttcagaagcaatatgatcaatggagccaatccgactaggagttgaggaggaatccggggaatgaaccatttgcgcgtgtactggccttc  
gagccatgttctcacttttaatggttcttctaccatgtttgttccggatcttctgttaccattgacatgattattctcagcagaagctgctcc  
actcgaagaagatgaagccatgtgctcagttggcatcctgacccgagtagtgggttttaggtatattgactacatccttagatgacttcttattg  
aattcaccctaaggaagcaactttcgaagatatacttccacttgatccatttttactattcaacactgaagttcctcaaaaaatattaatagt  
tcaagtgtatccgaacaaccacaatttctgctggattcttggctcgtcttctccagagataaaaaatctttagactttaaagaacaaaat  
taaaggcagaaaaaagccctgaagccctacaaactaatttctgggttccaataactaaggtaagtagtaacggatgactgcaagttgc  
caaccctagctaatgaggctgagttacaatctactggagtagtaccggttcattaggtcgcgttctccttatttctttagacaaa  
agacatgtgtaacaaagaaagccaaaatggtagtttcatcaattcgtgtttactgcagacttttagcaaaaggaaagaattgaaacttgg  
aaatatgaacgaaaaataaaagcagcagcctttagtaaggtaacaaaaacaaactcggctcatagtgactgctttgagatcaaaaca  
agaaaaatcagcaatgagccttgcggttgttatgttcatagagaacaaagaacattcttataactcgtgaaactcgtgaattgtttaagcttaa  
agagagagaaagaaaggagaaagaaatcaaattgggaacattgctttaggaaggctcagttatacaagtcctcaattggcttataagta  
gatggtgtattagaaaattaagagcatagcaattttgggtgaattataaaaaacagaaaaacagaatgtagaattggggaaaacaggaat  
ttgtaatgaatccgtttagctagttcatggaataagaattaccaagaagcaaacgataaccattgtatcctgacactgggacactgcaactatgggt  
aggtaaggaaagataaaagggaatgttctcctacgttttagtcagccgggtggagtcgggtcagctattccatttcagcaaaagcttctacgtctat  
agatatgaatacaaatctactaaacaaacatctataacttagttcttcccttttggaaagtagattcttagggagctccttagtgaaggca  
agaaagttttccgcatatagggtgaagagccttaggaacattaacacatcaggagttgatagtttcaatgatgcagcaaatggcagcgt  
cggtagcaaaagagtagaatttaagcagtgaaacttcttctcgcgatcccatcttctcaccacagcgaattccaagttacagagattg  
gtagctgtacagttggagcaagaacaagctcctgaactcattctgtaagggaaccaagctcaagatcatacttttagaagcggcgttatt  
taaagcaccagagacaatggagactacaggaaggggatttcaaagcctttagaatactttagcatggttcatcatcaaaaagctccc  
aagacttctcaggctcggtaaaaacgaactgctcaatcttcaaaaagcagtgacagcaaaaatacccgagcagcagctcatgagaaccagc  
ctcacgagcgttagcaggtactataaccagcgtacttgagaggaagttgctcagcaggctttcaaacactcattactgtggaagcagagatag  
gctgctcagaggtagcaatcaagtagcgttctcgtcgcatcaactacctgtacaattcttcatgaattgttcaattgagcagcttagccatg  
acttcttctcagcatggttagggcttgaaggcgtgtaaccacgtttagacaaaaagtccaaccgaattggatcaaaagcaaatcaaaaa  
gacaccgtattgacgtaagaagtagcctcgggtggcagcaacttgacaccacgctcaggatcataaccatccaagcagtagcaatacctcgtgg  
gggaaaggcaatcttcttcaacgggtgacaccagcaggagccaagtcgggatcacttctgttctcgtcctatgtaaacagggacagagt  
cgtgaacgatgttacaatggactggacaacagtaagcatctcctgttttggcagctccttctcaatcaagctcttttctcagtaaggagt  
tctttcagctaaaagctcagaagcgttctttagccttcatcttcatgccaactcctttgacgcgattcatagacttgttggtattgtcagctc  
aaaacgaagagagaccattcctgtacattcaataacacggtcacgcaccaacatcagcaccgcgcttctttagattcgcggattagatc  
tgggttctcctttccacctgaaacaaatgatgccaacatcttcttagatagtttccgtagcttcaaaactaaccaaatattacaatgctt  
cacagttcggatttctcagcaatgaatccctcgtatacacttttactttagtttttctttaaattctattccttacaagaaacggaaatgtct  
cgcttaagaaaaagcctacaatgtaggggtgttggtaaggtaactactggaagccaaggtagaagccaagctgagtgacaactgttttgc  
atttgcatggcatatggaaaaatgtttttttgttcttatatctgcaaaaaataaaaaagaaaatctgctattatccttgggtcatttc  
tagcgtttatacactagatggtgactattagtagttagtttgaacaaataatagtttgaatgtagcttgaatagttccagtagctttcgatac  
agctgttttctcagaagtcgcaattaccaagaacatacaaatctcgtagcttctttccaggttttccgtagaataaattccataaggaaaa  
aggttttataagctggtactgaaagcgttcatcgttttaaatatcttcttttggtaaatccttagacataataggattaggccagctcga  
acgatctacgagaaattagattgaaagctcaaaaaatattctttttgacaaagcagatactttttcattgagcttctgctatcctgaactata  
gcagaaactcataacacttgcttctttatgtcacttttaggtacataagaagtgctataatttgcttaggcacatccattccagtagctt  
atttatgcagattcaagtttaagagcagctatctcagggttactgagcaacgcgaattgcaactctgtatgttccatggaagggcattgttta  
ctttactaattttttgttcagatacagtaaaagtttcaaaaagctctgctggatggtcaaagtagctcatgttttcaatgccaatagctaatg

aaattgaggatcagcttccactccatttaattgttcaaaaactcaggaagtctcgctcctctgaccaagatggagaagagaagctttcccttggaa  
atgagctaaagttacagtcctgtgacttttgacgactttatctgtgatggcagaatgcaatgtcctgacgaagacctctgacgatcttggg  
acgcaagaactttgcttaaatgcttctagaaaatgatgcaaccttaataataatacttttagggaagattctgtggaagatcctgccattcta  
tgggaattgtttacattttggtaaaaaagcaacttcccttttgggtgaacaggtttcttctcagtcctatagattattgaaaggtatgcaatttaac  
gaatgcaaaaagctcacatacgtatagatttctctacagacattatgaaaacagacgatgtctatgctttattagaaggggagtcagtgattt  
gtctctatattactcatttcagtttctaaagatcgtgaagagattctgtgaaatcaaaagaaatggtgtcaccgggtggcatcttgcaattgct  
ggatgaacttgaagattttataacagaaaactgatgcaaaaatcattattcccaccagatacaattattattatctatctaaagactttccttccct  
ctggttcggaagagggttcagattagccaaaatgctaagcttcttcaaaaattcaataacacaattaccgaattgcctatcaaggaaagctttt  
ttgaatctgtttctcatgactctatacaaggcatttgcatacaattatctattcaagttttgatgaggagatttccagctgttaaagatttactat  
aacagactgtgtcctccctgcataggtctaattggataccaagattgggctgtatcttcaattgtagacgtaatgcaacgtttaatgactcttgca  
aaagtgtttcgggttgggggtgtactagagtgacacatactggaaagaacttaatacgtctagtcgaacagcagcggagcatatagatttgcatt  
gatttaatagatataaataacatgttcttctaaagaaattccaagtgttctgcatagcatacccaaacactggaaagtggcggagtgctttcc  
atgtcggaccaataatcgaatcctgcaatagctttgcttcttattagaagctacatagggcagaaaacgattttgtccacacccccagtaaagct  
ttaccttgcatggctgataccttctgctccgatagtagcaagctgggtgcttcaaaaaaggtctcttattccggtagtcttccggatttcccatgttt  
ctttaaaccgttggcatatttgtgtacaacagtgcaatttagtacaatggcagaaaatcgaaaaatgcactagtagtcttgggggtgtatgagaca  
agtacgactccagaccaaatgaatgaaaaagaagaggggaaagcagcgtcagatagaataaaagatagatggtttctgaagcttccg  
tagtcataatgtgtttctagcagtcgttctcattcgattctaaacaagttgtacggcagaaaatcaaaattaaattatataattaaattagaaaa  
acttgaatataaaagaacgaattcacttcaaatgttttacaggaaattagcatcttccactaagaaggctatttcaaaaaggacttctgctgtt  
ttcatgatcggtaggcatacattaatcatggagagtagtattttagcaaggaaacgaatttgggttcatcttctgattttcttttttttttagaag  
aaaaaaataagcagaaaagaattcttaataacaccatactagaaaagtggttctataataccaagttatttctattgaagcgtatgtacaggtc  
aaaagtcaattaaataatagctcaaatctaatcttttctcgtatgaacgcacttcaaagttatagaatatttacaggaacgttgttacggcc  
aaagtcttattcaattttgtttggatatacatagtaatcaaaacattatagtttaactgctcaaaaagactatataagccattcatgtcttt  
ctattcaaatctggtttgaaatgagggcccatggaaaagatcgttcaaatgtttctaagtagaaggggaggaaaagagcattggcgatcact  
gagcattcaccttggcaagcaacaagctgacagacaccgatacaactattcccaatcaaaaatcattttcggcttctatactttggtagcgtga  
cttcttttcatcctaggattcgcacatcgaatagattttccaagtaggggttaaacattcttcttcaaaaagcactactataagtaaagatt  
gcagctgcgttggcaaaatgatttcaaatattcgatgaacaaaatcatagctacaaaaaggagcaatggatcatcaagacattagacctaac  
attcaatttggagggaaaagaaaatgtttatattactgtggtgagcttcaaacgtcgcactcttctgtattcccatcgtatgcatccactatgcatc  
atcggtttctgcatgtagctgacctttatgttgaaattaaagcaggatttctactaatgataccgggttgagatcgagaatgatcagtgttccc  
atgaaggaatatagtatcaattcgggtataaatcattatctataccttaagtttcaaggctcaccttaagatcatcttttagtatttactagactaa  
ctttcggcatccctcattgacaagatgtaaaggataaaagtttgggtgcctatgagattcgcgaaaatcgttctcatttctgataaatcgtccttgg  
atgatcatggtttgaaatgtgattcaatcgaaccggctactacaatacattactgttcgaaaagtcgcaaatcagctaatctataagccatg  
acgaagaccgatctgcagtcacaagttgtcataatgtgattccatagtaagaataggcacgtccaacctattcaaatcgcagtgatggaa  
agtgagacaattgtgattcgaatcctacagttatcaatgtttgaaaaaatcaggcaatgaaagaactgttatttctctgataattagcaatgtg  
attgaaacataattattgtaaaggaactgcaccggctatgaaccattagataaaatggtagcaacgttgccctaccgtcttaataagcagaatt  
catcaatgatttattatacaaaaccataaagcattccatgggcatacgttacagtccttcttcaagcaagatctagcacacttagttcaac  
aactagaaaacaaacgtaaagttacctaagcaagtaacctaacgaatcaggagtttagacgaatgaaacctgataacgagagaaccgaaggcg  
cttattttatttattggccattgacatcaccgtgaccgcatcatgatacaagtgacttttaccagagaagactagcaaaattatagccaacataa  
acaaacacggtttagccattatacaaaaattcaagatgaatgggtgacactttgataaatgtttaagtataatttaccgtaaattttttagttc  
gtgaacacgtaatcttgcacaaaaaacaataatgtgctatagatttagccatagtgccaagaactgtaataaatgacgatcgaactgattctg  
gaaatcaaatctatacaaaatcctcatctttaaacaagtgtaagagaatagtagttaccaagttggccacgataggcataaatatagctgct  
atgcatagtagtgatcttcaagcattttttttcccttatacaaatatggatcattcttccactgaggaaatcccagattggcaaaa  
caaggcccttaaaaagcagccggtcttcaaggtccacagtttcaacagatatttgaatgaataccagaagctgggcctctagttgacga  
cgatgaatacgaacttatgatcaaatgaaaatttgattgacgaaattgatgatgaatcgtctcaaacatcgaaaacaacaaaaaggacag  
aataatcaaggtggacgattacgtcttcttctgttgacgattgggaagcatttttgcgaaaagcctcgacaacacaaaatcaacaaggcca  
gtctgcaaaagacaccgagagagaagatcagaaggactcaaggatccatacactgatcgcgatcaagtttggtaggtatattttaaatg  
aaaagcaattttggacgaaactgaccagcgagattatcttagtgcgtcgaatcgtgtaagttttgttattctgaggaacaccaattcatt  
tgctaattatgaattaatgaattaaacttttataacgtataaattatattccgaccttcttcaaatcattaaagaaaagaaagacgcataatt  
aataaacatttcgcagtaacgaaacatgttcaaatgatgtttgttcattagagggtatgtttaggttttagtcagtaaaaatcatttcatagtt

ttccaatacatatttcagaatctcacttcgtttattgacattctcaaattgagttgaatatctgtctctcatgagagttggagcgaacagtagc  
aagatcttcatagtcattaaatcttctgctgattatgagcaacgcgtaaaaggctgaggatgatactggaagacgctaagggttcactagga  
agctcttgcaaacctgttaaccattcttcttcgcaaacctttgcaaatcctcagccttcagtagcttctataatgttcttcggaattaatg  
gggtaggaagttatgtagataagttttaaacaagaggtaacaagcgtaatgtagaagctaggttctgtttgtatattgctttgtcaaacatt  
tcaataaacgaacgaacttgagaagcacttcagagatgcatataatacctcaatatgtaatccatgagcgtcgacacaactcgacacatctg  
gacaacttaggaatagcctgttttcaatcttctgctggatcttaatggctaccaaacataaaaggagaaggctcgggaggtggtactctgatc  
ggcatttctggagcgttatcattagtctctacatcttcatccgaaaataactcaactcttcgctcccggaataaaccttcttaaacagcgagaatg  
gcaagccacagaacattcatgacgagcacttctgaacccatattgttctgaacagataaagcagcgagacggctaaatagcattgacct  
gaaatacatgatgacacactggctttctgctaaataaacaggatcagcagacttagatttgcagaaatgatttaaaaggacttttctgattat  
agccttccgggttttagcaatcttaacacgtaattcaagtttataaaacttgcctgcaaaaggagaagtgaaggctggaagaactttgattat  
cgattgcagaatcagaagaaggagcttcaagatttctgtctataaacagctctatttgcgaggattggcttccatcaactcttcttctgctgg  
atctgacttgcacaattatttcaagtcagctaattccagggttttggcatttaagtgaactgacgcttccaatgactcgttaagtaactttgggca  
ttagaatagctctgaaggagctcattccgtcgttcaataagttgtaatttctgaaatagttatcacgaagcatttcatgtaagcatccgctgc  
acctaccaagctttagtaagagggtcctttagaataggatcatcggaacatcaccaaatgaaaaaatctttcaaacactttagcttttgggt  
acgtatagcatctctattctcagcaaatcaacgagctctcggatccagaacccattgaccttgacgaaatggattccgttaaatgtgtgagttgt  
tgatttgaatcttaaacgcttccatgtcaacctgtagtttgcgaaagactggcaatcggagaagaggaggcattctgtttgttagacgct  
ttggcctcaagggaacatcagaaggggaaacgagagtaggtgtgacgaatctgaacgagaatgatgctgctcactaaactttctacgttcatc  
cttcatcagaaggaattgcctcaggagaggacacaaagtgagagagtcctgtagatttgcaggttgagaagatgatttgcggtgagcttgcgatt  
ttggacttaagttcgaaaaacattaggataatcatgaggagatagaacgattgatgaggagaattgctctgtgattcacgtaaaagaacgaat  
gttattattagaatgtgatctgtaagacgtcagataaaaaaggttcttcttgatgagggaaaaacccaaagtcttcaataatcttcagaagg  
cttctgctagaagaagaattgtttaaaggagaggaggttcttctgaggattatgtgctgtaagagtttcatctgttagttatgagag  
gttttggaaaagagaacggacggagaaggagcatctaatgacatcaactttgacaggtgaactaaagctattaacgaagtgaactttcg  
ttttctggttgaaaataaggagtcaggagagtgaaagtgagaattggtagaatgcttctgactgactgattgagaatcattattaacagtg  
ggcacaccttactgaatccttttgggagtcaggaccttgaacttggaggtgatacccttccagggttaaggattgattagagtcgtcgaa  
gaagctatttcggaatgctcgtggcaaatcacttctattgacgtaaggttccatttctgtgggtggcataaaagaacagtttactgctgca  
gtcactgcaatacacagatcggccatcttcacaaattcgaattattgattgttttgcattcaagcactgaaaacagctctgatgatacagag  
caaaccttcaataaggcgtaattctcaatcggccttgcaaatgtgacaggtgtcgagcattcgtgcaaacaggtcttccatcgatgtttg  
aattagcaattgattctttagctagattattcaaacatttgcacacgtaaacagctattatgcaaacgctcctcccaaacgaaatcggtgtt  
cttccgttggaaactacgccacaacaggtacaacaactcctcttggcaacgataagtttctaaacccatcttcagattcttctttgaa  
cgtatcaagaataacaaacttcatcaaatgataggaacctataacctactataaccaatcgaagacgctaataaaacaatatgtgtttagg  
cttccattgaaatcggtcttattataccaaccgagttatactctcatacactctgatacaatcaaaaaatgatgggtgggtgtagttagaaatcaa  
aagacatcatggtatcttggtaatgcatgttggcttattgacattatactctaccatagcataccctacagtgcttttagctcgtatgctaaaccta  
attttcttggtaaaaaagaaagtaggctgaaaatagaattgaataacggttaataaaaaagccaaaagaaatgaaatggggaggcatttca  
ttgtcttaagaaactatcgaaaaaagccttctgtatctgataagaaggagcatttgtttgatgtatgaaaacaaaaatacaaaaataaaaa  
attaattaacaacaataaagaatgttctacaaggaaggagacagagcataaaggaataccgagacacggttacaaaaaacaagggat  
taggggttcaagaaaaatgcattttaagaatgcatcctcaagagacactataggattagattttattatgattcaggaatggcatttgcct  
cttctgcttttcatcagactcagatggaaaggaatactcccacgaggacactggctgagctaataaacatgaggatccatacgttctgaagg  
gaatccatgtcataggatattaaaccaacgtactgttttgaatcttcaacatcctcgatattgactccgtcgaataggattttatagtaata  
gcaaatgggtgaacatcgtcgtcagaatcggattctcatcgacagatgacgagctatgaggatagctagacgagatcatgaacagatcatc  
gcttgacttaccttctagtaagttcttgaacagctaattcaagcaaacgctctgctcgcattcttactcaaaaggtcggttcttacttact  
acatagtttaaggactttctgtgctctagactgtactctatcatacatattgatgtcgtcttctcttcttctcagcaggactgtcagtgctat  
caggcatactctgatactctcgtattagcagaagcatcatcaacggaatcagaacttgcctcaggagggtaggaggcaccacggattccag  
tcaaccgaggaagagcttactattggatgataactgttcttccatattcaaatcatgcttttctcaagcgtgcttctcctggcgtgagggata  
aactcctcatcttgcaaaaattcagatgaaagtttgcggttcaacctttgttctgcttaagaactcgtagcttttgcgaaaaggaagatattc  
caaacaccaggaatattgaaccgatcaaatgagataatctgctgacagctccacgtctcggtaacgaatagatgatttctgatgaaacacagc  
gcttgactccagtttcaaacgaagctcagcaaaaaagctgaatttaaaccaactcttctgtcttcttactacgtttagaagttctgta  
aaaccaacgaggtataataagttggttttcttctcactgtcaagctcagacatttattataatagaattgagagcatagtttccatcatagga  
acgttaacaagacttctggctttaaagactcgttctgtatcttccatttgcctcaaggtttagggaggactccttattctcattctcagagcttatt

tatttaaagcctaataagtcggtgagagcaatattcctccattcaaccattcagaactcattcagatgaagcaggaatatcttctgacttgatt  
aggcatcggctccgagtagaagaatcaacgtgatttttcagccagcgaattctgtgtccaaagcgtcaatgtaatgctgaacatgcgaaggcct  
ttgctaccaatccataaagaaccccttccgcatttttttccacaccttgcaagtcctcaaaaaaggaaatgttttcatctgtagtccaaaaagt  
attaccacgaaagaaccttctaatttcccattcggcttctccgaatctacaacatcttttctaatttcatgtatattttgtaaacgtcc  
aggtagcctcactgtttcacgtaaaggacctgccttcatctgcccgcgagttttctgaaatcacgtctatgcgatactgcgtggtcagttt  
ttcaaaggtagaacatgctctattgagagtcagatcgaagaaattagaagcctatagaaccagcaaagcctaactctctgatttagaagggt  
atgtggttccaaagtgtcttctgtaggaggaagggtgagactcttagagaggtggaaatgtttatgctatgggtagaagaacagtggtg  
taagaatacaatgaaagtgaatagaaaggaagattgaaagaaacgtttcccaatgagaactctgaggattcaagaaaaaggagattg  
gtaaaagctactcgtcatcttgcattctgaaatgattcgtctgactgaagagaataaacccattggaaatgactctacaacattactttcg  
gttactgagaagtatttataaagcatgatttcatgttctactaacgcaagtagcgaattgttcttaataataaaaaatccaatggc  
tgctcaaaactacaaattaattcgttctgtgagagagaaaggattgtgatcacattaatgacggtgacggacggcatgttcagcttttgattt  
tagatttttctggttcaacctctatcttcttctgattcataacgaaacctattttcccttcttctgttggaggacgaattggcacacttgggtg  
ggatcattttcgggtagtgaatccatctgccaagttcctcttcatctggaccatcattctcatcttctgtaatggtaacggaaacatgcttact  
tcatcttcatattcacgcgtatgaggttcatctcatcttcttattacgaccttttctcagttcagcaccgtctgaaccttcatctcagaaccaggtt  
ttcattgtcccattaattctctgaaagttgaattcgtcttccaattgcttttctctgctctcggacctacaagaaaaccacatgtaaatag  
aattcgacaggaattggttcaaaagcaattcgtttgtcttaccattttcgatctcagtttctctctggttgttttctctgcatagcttgc  
gcttttgacgtctactttcgttgtgaaaccagtcataaattccctaatacgcggttaacacattcaatcctataatcatatggagaagcttac  
tttcttctccttctcaaaaataatttctcctgggtgtgcttacgctccgctttttatcgtagacgttaccaccgctgtcaaaaagccgtattac  
cattcttaatccttacttagttttctcagctccgataaatcttttcttattgtccctagtttataaactctgtgatgtaatggtaaatatcat  
aaaatgataaaaatctaccagatgcattactccttaactgtcttctcgtcttcttaccgacctcaatgggtatataatatttagtgaat  
agcattcttctttagaacgcttttacagattctaccatcgagaataactatattatcgacatcgtctactcgtgaatacaatccttgacact  
aaaaagatacttgcacagaacgaaactgttttgaccggatgtttgtcaatcagtggaagaaacgccaagaaacgggtgtttcaggggta  
gcggtaagagaaacctgccagcgaatttctcaacgcgtttgttaggaaacatatgaacgacgcttaatagaacaagcaataaacgaaact  
ccaaggatcctgtcactcagcaagagtgtagctagaagattggttctgtaaagggtatgacttgaatattatggattgaagtaggaagggtg  
gaaatgctggaggaaacgctgaatggtgaaataacatcagatgcgttctgtttataccttgcagtaaaaaacaggagggtgcttgg  
aaaaatgctgtagcttgaactcaagacttttctgctacttggaaaagatgcctcaagttatatttttctattagtttccctttgat  
tttctttacagcttcaagagatgattactaactctccttagtaccgaattgttaaacctcgtcctcctccgacttattgacagccttact  
ttcctgttccaggaagaatgggatgctttagcgtggaacagtttgattacggaaaaattgagcgaacaaaaaagaactctcgacgtccc  
tttattcgttagatgctgcttttagagtatttctcggcttacgaaggaacgcgatgaggccagagaagcattggcaaaattctcgacaatattct  
tctctctcaatcgaaagctgaaaccctgatgtagaaatgaaggatggttaacgacgatacaaaagcaacctgcaaacacagctcagcagaaa  
cccttaagcaacttccacaaaaagaaacaaacaaatcagcctgctgggcaaccagaggcttgaaaaaactgcaaatagttcggc  
ggttccggtttaccttctgctgaaaaggacgttaattctttattaatcccacgacctggtggtgaggcgttctcttctggttgaatacgggtt  
actctagttgaatgttttcaacaagcccctaaaatccttgattcgtctatctacatggtgctggttagatgtttcaaaattgctctatgaatt  
tgatacgaagatgattgaagttatgatgttcttctcagatattgaaatcgaatcctgaaccttatttcaatccctgtcgaataatgaaaccgtaagt  
tattatctgctcatcaagtggaagtacatcgttgatctacggatacagctgactttatattctatgaaagcaagtgctattcttataatcc  
cgtctaagattactgcgttttcttaccagatggacatattttgctggtttagaaaaagcgtgagattcgttctttagacagtgagtggtg  
ctgaagcagcaaaatttggtcccaagatggtcattcaatccctgcaattggcgaaaatggctattggctggctgtgacagcagcaaatgaa  
aacggaatctccattggcacttaggaaaatccaagttagttcatatggtcccagacagaccagctgattggatgtaactgca  
caactatggccttctcagatgacaagatattgtacattcattcattgttaaaagcctccaagcttggaaacctggtgagcaaggttaggcttcttg  
gtttcaaatagcttggatggaagatccacacaagctagtctattctacaaatcaaggttctgttttggtaataagtaataataggtc  
ctctataataaataccacatagagactgcaagtcataaccggttagtatacaaaaatcaaacctgtagttaagttcaaggaaaaacatttct  
atacaataaagtgaaaaacaataagacattcaggaacaaccttttaactcgtaatgctgacttctcatttagattcggctgtattgtaacca  
gggaattttcacatcgagccaatgtttgaaagtgagttgttcttaatcccactaagctgtttcgttataagacaaaactgggacggta  
gtgggtgaaagatgataaccagaacgacttaattgctttagatatacattagttgctgacagcagcggatcattgaaagatgacactca  
atgtgatatactctgatgatactgtgtttatcttcttcttcttcttctgctatctgcaatcctgaaatcgagacagaagcgtttgtgtagc  
cgtctatggaagcattgagagtattgtatggtcagtgagcttcttggagacttctgtagacatattgaaaccgagaaggatcttttgatgatt  
ggatgaaaaaacgcaattgagaatgaagcttcttcttctatataagacaaaattggctacgaatgtaatagaccttttaattgaaga  
gtattataaaaaaattgaaagatgaggcaaatgaaactgcaaaagctgactcttttggaaactgtaaatatgggttcttcttccgtacaact



cagcatacgaatttctaaagctatcaattaggcagttctatccaatttcttcttgatgtttatTTTTtaataaaaaagatttaattatcacataa  
aacaaggtctacgaacttttattttgattcgttacaatatgtcacagtcaggcttcattatgggctgaatataatgaaaaaccagtcaggaaa  
acaaaaacgctagaataaatttttagatgaggcagaagattcatctgaagaaggctacgcagcccttagcattcaggctgtcaatcaata  
ccagtagaggagcctgtgtggaaagaaactacggagaacgatgcttctggatatacaagtcttcttttctaaatttactaatcttcaatcagttta  
cggttacgatgaatattatgattctatgaagagtgtgagcagagaacaacaggaattgaggcgacaggaagctcaagagcgacgcccaggta  
tatggaaaaactcatagagtctgctaaaaccagaaaaagagatataactaattgctcgtgagcgagcactgcaaaaaacagagagttagaagg  
tgatgatggggctgaaaaattgttaccagcagttataagtgcacatctgaagaagtggaaagagaagttgaggataaaaaaggaggagaaga  
agaactggaggctcaaaattcccgtggtggtgatgaaagacttttctactatgctcgaacgacaagagaaggagcatgaaaaagcagtg  
caaagcaccattgcaaaaccgattagccaacaacgtaatgataatgaagagaaaagccggcgagaaggctttccatgaaagttataaagcaaat  
gaatccctcgaattaaacgataataacgagcttattgatcaaaaacaagtactttcagcgggcttgaatgtcccaaacctccttctacgaaatcg  
tctttgccagcttctcgtcctccttgaatggttcacgccgagaacaagtgaaacgaaaagggcaggtataatcacagagggtctaaggatat  
ctattctctggagcaagtggaagaacaaaaacgaaaatgaagaggaacagaggataaagaaggcaaaagaagaagaaaagaaaagaga  
aattgcaactgaaaactcatacggcaagacaacaacagcaagcttctgctcgtcgggaacgatctgaaaagaaaaacgcaagctgc  
aaattcagaaggcgattcgtaaagaccgggatatttcttttgaataaaaaattgtctatttttagttatgaactactaaactcctgtgtgttaa  
tgatttctatacaggatttacgagttcgctgaaaaataaaaaaaaaaaaaacgaaaaaaaaaatctgatcatctatgggcagtatatattcaa  
ggaaagaaaaaggcttacttaagtataatttattacgaataataaaagcaaaaggacacatagcattaaaaaaaaaaggctataattcatat  
agatatgtagcaattgcacaccgaagagtcaaaagacagcttataaagaaggaataagtgaaaaagaatacaatcaatggtacctatc  
agagacacacaccaggggactttatcttttttacttggccataattcgttgaacgaattcatggtaattgaaagttcctgaattggtaggatc  
agcttctgaacctcatttggacttcatgctccggaatTTTTtcccaaggctcatatactcagcaaatggcgttttgatgtaaccgctattg  
tctttgcaagacggtaaaagcttcacaaactctcctcggattctgttctgtaatttactagtagcaaaattcataactTTTTtccatctatag  
catccaagttcgttggataacttggtaattcggcatctgaaacattaatgccaagcttcttaaacagagccaacatgacttgtgggaataa  
gtccatctctgtctatcatagagttaaaggccttttcttcatccaactgttctttgaaggagccatcttctattagtctactgttccgatta  
tattcagcttctgggtctagaaaacgcgataataaactaaatctaaagagatgcttcaaacggttagatagcttaaactccagctttct  
tgtttagaggggaagcagtatgttggtagtcaagagcagggtaccaaaaggtagcctaaacgcacaaagtagtaagtaacatataatgaca  
ggttgaacaatacacgtagagttactctttgttacaaggataaaagcaaaaagaatgagattcataaaggtaataatactatgaataca  
tagaaactggcgaatctttcacgaggtcctcaagggtcatttctctatgctacatgcatcaaatgagtaggtataagcaatcttcatataa  
taattaggaatgggactgttgaagaatagaagtaacacgaacaagaagaacacttcaagagcgggttcatgctaagggaagtaata  
tgaaactgtcataataaatgtaggaacaatcatgtagcgttatttcaaaagcaactgaatgatattgataaaatcttaatttagaaatga  
atcgtatgagattataaaaagcacttgcagtaacttctgtgaggagcagcattataacgtttccaggcaagtcgtaaagcatcgtattctactctt  
ttttttgttcaataacagaagtaagcaggtgttgaatatttaaactagagacagatatacctgttccattttagatcacattcctcaaacga  
gctgtttatttactaccgaggttagattttgacagttctgtaaaaccacattccacaggaagcgaatttcaaatcttgtatagtgaggta  
taatgagttgcgaaaatcttgtagtcagcacttacaacggcgaatatttctgacgctgccaacatcgtggtcagaggacagttacagta  
aaaaatctcgatttaccatgctttagatgataaatggcagaatcgaatccgatactgaatttaagatccagcctgaagccatctcggttagca  
aaattaacactgaggaatggccttctgttgaaaaaactcgacaagcttctgttctgacgggcttataccccatcccttggtagcaatcc  
tttaaagcggcaattgctgactatgttctcgggtgtgatgaacctggataaacagcaatccatcttctcacgaagttgttgcctgggtgaaa  
aaaattcttctgttagagaagactggccacagtggtacttggatcccaaggctactggctgcttgattttgcaacgatcgtgccactcgtctgt  
aaaatctcaaaaagcgtggtgaaggtagcttgtattttgcgtctcagatgctattgagaacgagcgaagcttcttctattgagact  
ctcaccggtccttgtccagcgtcctccttatttccgctgcaagcgtcagttgcttattcgtagcatttacgaatccaactgattgaattgac  
gaagacagaaatctgcaatttctgggtagttgtgaagctggtacttatatgctacccttgtgttcaactcggctcttctgttgggtgtgctc  
atatgaggagcttctcgttccgctcctggtgttctgtagaacgacgacatcattactatgcatgatataatagatgctcaatggctttatgac  
aacactcgcgatgagttacttctgctgctgctcattcgcccttggagtctcctcctcgtcggctataaacgttgtctgcaaaagacagcgtgaa  
tgctattgctacgggtgcaaatgatgattcctggtcttctcgtatgaatccggcattgaggtgaatgatgaagttgcttctatgactactaagg  
gtgaagctatcggctcggtattgctcaaatgtctactgtttagcttctactgtgatcatggcgttgttccaaggttaagcgttcatcatgaa  
cgtgatctttatctagacgttggggtcttgaccctaaagatgaagaagaagagcatgaagaagagggtaaactgacaagatggcgtg  
ctaacgaaaaatcccctgccactggtcaaagagttacgtttagctacaacgatcctaacgctgctcctgctgcttccgctaccccgggtgctg  
ctcctacaccagtcaccgagctgttctctgagcatgctccttctgtagaggccgatgctgaaaagaaggacgagctaccaagaacgcaagctc  
gaatctgaagacgatgaagcccaagaaggaagaaaaacggcggagaaggaggaaaagaaggagaagaaggagaagaaggaaaaga  
aggaagacaagaagagaagaaggagaaaaaagacaaaaaggaaaagaaaaatccgagtaaaggtgctgaagaaaacgtgaattaaaa

ttagcgtggaacaaatattaattctctattgtttggttagggtacatctttcttttggaaatctcgctttacagtctagtctttctagagggtgaag  
ttttacgggtataaagcttctcttttataacttttctctttgtcaaaatcacgaggatcttctgtgtttctatgctctttgactattgactattta  
aaaaaagaacatttgagttaaacctgttcactgttctataaacaatattgaaagttttggatattataattagtttctactggaatgtgtag  
attatttgatcaaaactatcgacagtcaaaactattcagatttaaaactgtttcaaaccttctctttttcgtttttacagattgaaacaatttgaat  
ttcattttgagacttttctattacatattagtacttgcgtagaattccgtatttgcgaccatacctttcacgacatacacacgacttggcggg  
agcaggatccatcttctgttcaaacttgaacttgaaaaagcttagtctaattgttcaaacattgactcaataaggggtttcccgagacttttaaat  
accgggtgtcttgcattttctacaaaatggggctccgaggaattcatcatgtaccgaaagctcatcgtattttacatcgaatgcacgctttaat  
gagattttgtatttagagaatctactaaagtacgctccgaaagtataactgaagaacatcccaaatgaagtggaatcattacagcaatac  
cagcaagacttttggatccaaaacgtcgaggattggttacagaaggatagttgactccttgatgctttaaataaaatttctcctactatagga  
ccgagtcaattcaacaagtattgacaggttactcatcttccgctgagggacttcaagtctgaaaagaagcttacggttgacgaaaatggcatag  
ctatggcaaaaggaaaacgtaaatctagtaaagcaactgtgaaggttattctgggactggagaagtcttgttaacggcgtcccatggctaca  
tactttcaacgcttagtacatcgaagcatgtcatatcttgggtggctagcaaacactgtcacaataacaacatctgggcaactgttgggtggag  
gtggaccgaccggtcagtcggagctatccacgctgcattaacaaaagctcaaaaagttcacgagccttccctacaagatgttcttgcgaaagcc  
ggttgtgtgagaatgacaagcgaaggttagcgaagaaaactggacagccaaaagcaagaagaagtacacttgggtcaagcgttaaaag  
tgcccttttataatcaatttctgtttacttgtacacatacaacgctatttcttctgcaagtttcccttttctccttataactaaaaagtgaaa  
gaaaaattaccgctttatgaatccattcacctcttttggactgtttcaaaaccagcccttgttttcaattctttcaagattttgtcacgcaca  
gctcaataatgtaccatttcatcaccatgagtttattctgcattttaccttctccatatacagcatttttttttaattttattgaaaatttct  
gtttgttactatttttgcgtgtcataacaactaaaatttagcaactttgaccagattttatttattagaggaaatttgccttcttctttccac  
accactaacacatgtctgtcggtagcgtttacggaaacacactcttttccgctaaactgtgtttatctgtcgtccgcttggcgggtgcaaggt  
gatagcaaggaatttggctttgacgctttccagctgatcttctgccaagttccctgcaagaagttccgcttctggtgcaagatggtttga  
gctttctaatccatggctatcgtctttattgtaagtaaacgtgctttggaaggtctttacatgtagtctgtaagactgaaaagcgaaggttct  
acgccgagcaaattttccgaaagtaaacgaaaatcttgcgttgaatgatgagaataattttttacagttatccctgtctaaaacatagtggtg  
agaatggtaaatcgaatttgcgcagaaacacttctgtttgtaaaagaacctatttttttctttatactctatttagaactttactaattttctt  
agttgccttctcgacaagactggtgttcttggccttctgaagaaaaggccaagatctccaatcgtctcctacttcaagctctgagttg  
ccagtgtggtcttccctggccttaggtcgttattggtccttacaatgccaatgttgagaagcaagccaagctgcttactgaattaac  
tcgtttgaaccaattgcttgcgacaagacctacctcgttggctctcgttacttggctgatgtcttggcgtcaactctttagtccgtcattcgtt  
atgtttggcaagagtgattggccaaatgtctaattgccaacgctactacactaccatgtaccaccaatgcggttggacagcatcgtcgggtg  
ctctcagtttgttgagaagatgctgaaatccctaagcctaaggctaaggaggcccaagaaggagcaaaagcctgctgagcccgctccgc  
ccctgctcctgctgccaagcctccaagcacccttctgctccttccaatgtaacctgaacattgaggagttcaagcgtgtctataccaacca  
gacactcgtactggatcccttcttggcttcttgaccactatgatcccgagaattactcttggaggttactatgctacctgaagatttaa  
acaacctatctttagtggcaacttattggcgttcttccaagacttgaagcttctcgttaagtacatcttgggtgctgcttgggtattggtga  
gaacggtgacaacactatcactggtgcttctgtatcaagggtcaggatcatgttctgccttgaagttgctcctgactgggaatctttagcttca  
ccaagctcagacttcaagcccgaagacaagacttctcgaagacgcttgggcttgggacaagcctatgttcggagctgaaagcggatggc  
aagatgtcaagtaagtgattgatttgcatttgaacatctagttcgtattttaggataaggttgtttgatttggcaagatggaaagatg  
gtcattttgatttccgctgaaatcctaccgatggtattgtgtggtgattgtacatgagggagaagcttctcgtgtgctgactcaaaagttt  
gtttctacaacatttactttgagaaacgaaatgcgcaaggaagatggatgagtagaataatgaaagtcatttccagaaatgaaatt  
aattttgtataaaaaagataaaaaagtcgagcatcatctgtatataagaagctagagccatggtgtatataacaggctttagtagtcttctag  
tctggtctagatggcttactaaaagtgtaagggaagaaaattgaaatggatgaaaatagatgagagtaaaattacagtaaatgagagttcgt  
ttcaataacagtgggataaacgaaactgaatgaggttgaatgtaccttggatggaagctccctacttggatgaatgaatgcgatattcttct  
tgtttcaacgattacataaagttacttaagatcccactagttctatttctatttctatttctatttctaatatattataactaagtagtactgttt  
attaataccccgatcgttcttatttaattgctgactctgttcttccaagtaggtgcttggctgaattcttagttcagttactggccaaaacaat  
aacctatggacgtaacgagttcaatcagtagcattcgaattcactgtatcatagacggaaaccaagaatcaatgagaaaagaaaaccga  
catcaatgtgaagtaagtagcaagtgattacgtttgggttgcaaatgaaacagatctttcaacatttaactgtgtaccttggtaaacgca  
catttgaagtgttcggtaagaaaatgatgattaaaggatgaaaggatacttaaaattaccaagttccaaccacattttagtaccattgtc  
aaagcaagatcgtttatacaacctatacaacctataaataagagtcattttcagcatgagtagttcagttggaatcaaggaaaaaaacat  
acaaagccgaagatagtagctagttttgatcgtctatagtcgctgagaacggaacgaaaacagaagccaaagtgctgggtactgctttaa  
ttctcttaccgtgcaaaaaaccaatactttgtacagctggaatgttcacgtatgtatagaagaatgaatgtcttcttgcacatggaa  
aggaaatgatatactgttctgtgaagagctcgtttcggtaacctgaccgactctcagcggagatgtatttctagatcttcttccagg

ataaactaacacaagtttttagattacgggtgctcccttgggtcaacggagctgtgacttcagacggccatattgtgtgcttggcatgggtgcttgc  
caactcgcgacaggagatgtcgaagactcaccagccattgcaggcttgcgtaccttccgatctcctctacggaggacggccgtctttttattgag  
gtagaagaccagggcgatgggtgctccatgtattgcaacccgaggggtgctggagaaacaaggccaggaagtttaccaaaaggaagccta  
gaaagccatgcccgtgctccacacgtttgcatcattggcgggtggaaaggaggttctgtagctgctgaatatctccgtgaacgtaactataaagg  
aaaaatcactgtcttactcgtgaaacatcactccctatgacagaccaagcttctgaaatcgttacttcatgatcattctaactgtcttgcgtt  
ccaaggaatactacgatgatctagatgtgaatttcgtttcaactccaatgtaacaaaatagatccaaagacaaaaccattttctatggcaag  
gataactcttctcagttgaattacacgaaattgatttttagctactggaggcgaagcaataagcttccattccgggtcttgatgcctccaacgttta  
ctgtcttctgacctggaagatgcctccaagctggcggctgtaacaaccgaatctggtgaagaagaaaaacattgtcatcattggaagtagcttcat  
tggactcgaacttgccattgtctaaaggatcattatgtatctgtgtaggaatggagtccttcccttccgaaaagggtgatgggtaagaatggg  
caatgccattaaagccctacatgagcagaacaatccaatcttacttggagaattccatccaaggccgaaaagtcactgctgatccttcaat  
tgcccacaaggtcattctcaagacgggtgaaacattacctgctgatgttattgtgtggcagtcgggtgcaagcctaatttgactaccttgcagac  
tcagttcagctagaaaaagacggaggagtgaaagtcgacaagaactgccgcttcaaggtcttgacgacgtatatgccgtcggtgatattgtca  
tgccccttatgaggattaccagaggatcaaagcacacgattgagcactgggatgttctgctggaataaccggtcgcgttgcgcaaatcacatcc  
tgcttggcgaaaacgctgaatacaccacgaaatccttactcccttcttttggctgctcaaggaagcaagtcagatactgtggaacaatgctg  
cagaaggctttagcagactgttgggtccaaggatccattactgattacaaattgcaatatttacacaaaggcgaaaaagttgttggagtcagca  
gcatcatgaaggatcctactgtctctcaatcctctgcttttcttacaggaagcatgccaacaaaacccaattgaaggaagtttggatgtttg  
ttcaatccgattgtaaaaaaaggaaacaatcatgggttgatactatagcttcagttaggagtataattctaatgaaattactttactattaat  
aattgcagaaaaaacacattctacaagcacaatccactcaatatttataatcatattcattttcaatctttattctatataaaaagccatcaaaa  
ctatactagactattcgcaatgcattaagcttcttttttctctgtacagggtagtttactttgcatagaataaaaaaagcaacaaaagaaatc  
ttcagaaaaaaggcaatataaggttatcctcaaacaccgaaggcatcagaacaggctgtaaaatgcttttcatcatacagagatgcttttggct  
atacagaaataaacataccattccatttataagactcttttaataaaggataacgatactggtaataacgtaaacataaagctcaaattata  
gtttgcttagttcgtactgactgttttttctgttaacaaagcgttaggactccgtagtataacgtagctacctaacaactcgcaatct  
tctaaagcatctgttactactagttttcacaggggtgctactgttaagaccaaacctgccaataccaacaaatgtttgacaagcaaatcgccgg  
aattagcagcttgcgttgaacaataagaggaacgattgttcaagtttcaatcttgaactttacgttctgtaagtgccaagatggaagcaacc  
aacgccagtgctgaacaactagaaaaacaaaccgacgcttgaagttggaacacacaacgaagcgtgatacgttattggatgggaaaagga  
gatcaaaaaaattgggaagatgaaaagggttcgaagcgaacgctccttagaggacatgtctcctgaagagttgcgcaaaaatacaaaa  
attctttgtaacatgccttacccttatatgaatggaagcttccacttggctatgctttcaccttatccaaggttgaattacatgtcttgcgaact  
ttgaagggaaagcgtgttcttttccatgggcttccactgactggtatgccatctgcgctagtgtgataaactttcccgtaaatggaaatgtt  
cggtcctaattttattgcccagaggaagaggagcaaacgttctctccaaacaagaaatgccaagaatgaggatgttactaagcacagtggta  
aaaagagtaagctgcttcaagacagctgctgtaagtaaccaattcaaatatggagctgtaggaattcctcgtaacgaaatcagcaagttg  
ctgatccaagtattggctcgaatactccctccttctgtctgtagagattgaccggcttgcgtttaggtatagattggcgcgttcttcatgaca  
actgacgccaatccttactatgactctttgttctggtgcaagtaaccatttgcataaggctggcaaaatcaagtttggtagcgttactgtgta  
ttctattagagatggccaacctgtatggatcatgaccgtaaaagtggtgaaggttgggccctcaagagtacaccggataaagatgcaggttt  
gaactccccgatgctgctgtaacttttagcttccattgactgtcaagtaacaaggtttacatgattgctccacccttctcctgaaactatgta  
tggtcagacgaattgctatgttggctccagcttgacctatggtgctatgagggcttctcctggagagttgtacatctgtactcgtagagccgcta  
gcaacatggcttaccagccttttgcgtgaacgagcgttgcaggaactcggcactattaagggacaggagctcattggagctcgtattaat  
gctccttctgttattgaagaggttatgtcctgctatggagagtggttgcctaacaagggtaccgggtagttacatctgtccttagtgactct  
cctgatgattatgctacactaggtgagctccgtaagaaggctgaattttatcatttgaatcctgactggatgaaatttgatcctatccctattatccg  
cacacttcttttggatgatgtgtccgaattcttatgcaagaagttgaagattcagagtcctaaggatgtaagcaactggccgaagcaagga  
attggcatacaaaagaatgtttctacaggtaccatgattaccggcattataacgggtgaaaaggttgaggttgtaagcccaaggttcgcccg  
acttaatacaacaagacttagcttctgctataacgaacctgagggctcaagtcattagccgtagcgggtgatgattgattgtgattgtgatca  
gtggttttggactacggtaggccaactggaaggcaataactgaagttgcttggaaacgttaaacacgttctccctgaagtcgtaattggcttc  
aagaagaattggattggctctcaatgggcttgcctgcttcttatggttgggtacacgcttacctgggatcctcaattttgggtgaaagttg  
accgactcccatctacatgcttctatactattgccacttgcctcaaggaagtcctaaggaagcgttctggggcttgaacattaacctg  
agcagatgactcctgaagtggtggactatgtttccgtgacagctctaagcctgtaatacatcatttctgatgaagctctattcaagcttcgccg  
gaattccaatactttatcctttgacattcgtcctctgtaaaagacttaattcctaaccatttgactttctgcctttacacatactgccatattg  
acgaaaaatattggcctaagggtattcgtgtaattggtcaccttctatgaatggcgaagagatgtctaatctacaggaactttatgactttgca  
tgaagctccaagaagttgggtgctgatgctactcgttggcttggccgatccgggtgatacgggtgatgacgtaactttgaggaagctatggct

aactctgccatthtgcgtctctatacccaagaagcatggcgctgagatgattgaaaaggtggatgatttgcgtactgggtctataactatcatg  
acagtgtcttcgataatgagataaacctattgattgagatattcccatgaagcttacagcgcaactgcttacaagccgctttaaagaattgcttca  
cgactccagaatgctcgtgattggtagctgaagttacagctgatcgcggaatgcatagggaccttgcctgcgtgattgaagcccaagttt  
gatgcttgacctttactcctcactggagtgaaatctctggcttgctgctcaagaagcctactagcattcatgtgctgtagattccctcgtgc  
ttctgggctgtaaattctgctctcaaaactcattgcaatacgttcgaccttgactaaactattctggaagctgaagctggtaataaaacgctc  
aaaagaagggcaagggcatgctattgatcctcaaaaacctaagcgttaagcattttcgttgccgataagttccctgaatggcaagctcaatag  
tttctactccaaaattactacaatgaagcagaaaataagttgatgataaggcaattattcaaatgctgataagaaggctatgaaggttgcta  
tgctttcattcaacaattcaagcaatcggttattaaccgtggtaaacacgttctgcttcatcgatttcagctggaattaggatttaacgaatta  
gatgtttacaagaggtaagccctatctattggtaattgttggtattaaggaactccgattgtcgtgtcaaaagcgtgccgatgattcttccc  
attaccggactgttgaaaatggctcgaagctggcagtgcaattgaaattgctgctaattttgcgaatccgcttccggacaaccaccttttgtt  
tgaaaacgttacggcttaaatattctgaattcataaaaagattgcatacatgttctggtataggtatagatagaacttaataatagctgtttgtt  
tggtgactagatttggtttatgcttgtaaatgaatacagagcaaggcatatggttcataaattactagacagaaagtcaacgtttactatccta  
aaaattataattcaattagtaaagtattataaaagtcagcattactgtttgatttagcacttaatttctcgacacctttctgctggtgctgt  
ccctactcgtaccaggtgcaaaaatttagagatctttgattttcacaattctggcaaaaggttggtagaatttttaaaaatattatataaaaga  
tgtcagaattaaaggagtaggcaaaaataatagaaaattactaacaagtcagtagcaggattttgcatgaccaaaatccacaggtgaga  
atgctggctactcagcattactccttatactgcaagaaataaccctcaattgatatttggttcattaacaattgtgagcctgtaaaaggatttaa  
ggctttattgaaggataaaaccccaattgctagtcaagcgattactgcattggtgaacgtgtctcagaatgcagcaattcgtagggtttatggat  
gatgaattttaaagctgttttaaatattgctactgatcctttgcatggctggccgattgtcatgtatggttctctgcaatttagccaaagaggaa  
gattttgtccgatttttagacatgcaggttctctccgcgagtttctcttagcagaacattattgatcaattgatggatctttgtaaaaggaaca  
aatcacggtatcaaccaatgcaaaacttgactccttgccaatgtcttgctgatatgacacgtttgaaagaggacgacaatattcacgacta  
ttcaagagtacgacaatgtttaccagtgctaaagttgattgtttcacggagcatagctcattattgcgcccacggggtagcagccattataaa  
aaatattgctttgatgtacctttcataaaattctatggatgaagaaagtgtaaactgcttccctatatcttactcctttggctggctcggaga  
cttgatgaagaagatagggagggcatgtttgatgaattgcaattgctccagatgacaagaagcgcgaacctgattgtttgatgaaaacac  
acgtggaatcttaattttgctttgtgcaacccgtgatggaagagaacactgagaactcgaactctatcctattattcgtgaacttcatcttcat  
gtagaggatgaagatctcaagcctttgcatcagtaagtaaaatgatgaagttcatttgctaacaattatagattggttcaaatgcttgcct  
gacgaagctaccgaggaagtggaacaggtactcaaaacccctgatgaggacgatgctattatagaagttgattaggaactattttggaaa  
aggagaaaaatagattggaactaggttattaggtcattaggtctgcaaaaataagaaaagtttagaccattggagcgggaattattagtaga  
cgttacttaagatgaaacagtgtaaagtggttgaaggcgggttagcttattttatatacccttttcttcttctatgtgcatgagctgtaacta  
tgctattcgaatttgagcaatgaataaccggcaaaagccaaaatttataaaaccgcaagccttcaattacacttagactaagtttcaaatgctt  
aataactttttgtaatatattatctgggactcagccttaagaagcaaacatgagaattatcggaataataccaagaagattcatgcaact  
ttgaatggataaagtgatgggtgactgtacttcaagttagaattctagttattatgtatgatgcaattttcaagccaaaagcgcgcttattgaag  
ctaaaaaactcgtatagctgttatgtcgaacgatcacgaagaatccaaaattggagcgatagatctgattagaaaacgctccaacatgaac  
gataatacaaaaaataattggatcatctgctattatgatgctgtaaaattcggctccatttaaaccaataaacgatttctcaaattaacagcg  
gataattattgctttgtcaaaaaagctcataatattatgactattccttcatagccgttcttctttggaattataatggcttgacacaaaagc  
tgaaggaactctcacgattcgccttagcttaataattcgtatattctcttcttcatgcataatgatttctttgagcatagcgtttaaactttgtaca  
taatctggtaatttcttttggtttatcttcaatccctctgagtttcaggcaccggtacatttttaggttcttctacttccgtaacgctgtaaca  
tctgtgagttccacataaccgtttattatcggtatttttaaggttcttctcacataaaaacctaattaccattgcttcttaagagaccattgat  
aatggttttatattgcaagacgggtgatgatatagcttcatagattcacggctcgtgtaaaaataaaattcctgtaaccttaaaaatattctgtg  
attcaactgtgatcaatattcgttgcgaatttgggtataattcttctgagatcttttcaagattgacatagggctcattctgtattaataaa  
tttactttgatatttaacttcgacatggctatgcgtcttgagatgctgtggaattatccacgttgaccttgtgatggaggacggctcctgtacctttt  
cctagtctttgacattaggccttggtttttcttctcataaatatttttcttcttcttctatggcttccgactttaaattttaggaattgccttg  
tcgtcaataacttttctgacttttgaatttagtaaagcagcctaaccctgtcatttcagtgcttcaaaggtttcgtgttcatacatataggag  
ttgtctcctagtgtgaacgggagaagcaaggacgtaactaattctgaaatgcagttgacctattcaatgatgaaacatactctgtattcctgcaa  
gtagaggctcaaacgcgctgctgttccaagcattattgacaattgtaaccagtttgaataagaatattctttaaactctggattctctgagaca  
caggtgctgtaatcgttcatgctctaatgaccacaatattgtgagatcagattcgttaaaggtagccacaacggaggatactatagcggct  
aagaatagattatgcgcaataggttgagtaatcattctccataaattattacttaacaaggatatttcaaatagttcctgtcacagctcgggt  
atatcgtggaattcattaacagtcacagatcatttaagttatctgacgtttgaaatattagcttaaggacatactttaaagaatcgtcgcgcaat  
aaagtaaaaaagattggatacactacagaaactgtgagtgcaaatcgagagtgaaataatttgcgtccactgtatcataaaagtattaaa

tccatgactttacagtccgaacgttcggactggaagattcgactggtctggcgagatgaactgactttcagacatttcatttagtaaaccagatccc  
tggacattgctggcgtctatatacgttcaattgtacagtatacgttgctttccaactcagtacaatgattaacggcgtgagagttcttcggtgacac  
tatagactcattttattataatcgattggaatggtgttaacatgtatgtctttgggaatcaaacgaatgacaaactttagcaactggaac  
ctttaaagcttctcgtcagcaggcaactccatctcagaatcgtctttgtacaatggcaaaggctttgcaattttctggatttttgccttgcattt  
caacactctgctattatgcaatcaaggtaaaggcaagaagacagaagaatataacgccaacacaaattttatgatttcatatttaccataaa  
agttggtgcgctttgtacgtggagtaccacgctcacaagtagcgataataaaatgcggaagggaagtcttatatttgatgtacttatcatcaa  
atcgtttcctaatttgaggcgcattctgcaaatgtgaaaaactctgattactaaaattgaggggaagatagcatccatgccaattgcaaaggcttg  
ctatgagaggctcaactaagtataggatagggaaaatcaaagggtctattaccataaatagcgattgaacacaacctagtaatatgacccaaaa  
aaccagattttctgaactacatcggagataacccaaaccgagtgaaagagccagagcaaatgaattaaataaagagcgttcaattccgtcacca  
aacaagtaagaaaacaccggaactaacagagaataggttgattcgtaatatcctcatcagatgaagattcgtttcataagaagattgatagaa  
atgcaaagaacaaacaaacaaagaaatgagtaaagggtgagatttcaaggttacggagccagcaataagcaatacatacctatactac  
tggaaataactagcaaacggcaaaaaacgacgttttgatccatcttctgaattcactagacttgaacggaaatacactataggttcagact  
catcttcagttggatcatcttcagttggatcaatcttggattcaagaaaactatacatgcccgttctgttattttgtctttagaatgttaagtt  
gcatcggacgtaaaattggaaccaaatacaaaaaatcaggttttgattcaaacctgaaatttcaaaaattcaaaaaaattataatcctca  
ccagcatcaatagcatgcttataagctagaataagctcgggtctgggtactgagcaaacggacataaacgatttattgtgtttggctttgaa  
gattttctgcacaagcaggatcagaatcattgtaagtagaattcaattaactacaagacatgaactcttgaggctcaggagagaaagccaagcct  
cgtatggcatagaagcaagagccgtccctgcaagcagcaggcactcaaaccaaataagcaacatgatagacgattgaatcgagatataac  
agcggaaatctgttccagtgggaaaaaaatcaccagaaaaaaaccccccccccccccccccccccccccccccccccccccccccccccccc  
aaccgagaaatgaagtataaagtagaaaaagaatgaaagaattaaagtgatggaataaataaatcaaacctgaatgaaaggagcaaaaac  
catgcaagctaaagattttatgctttactcgttcttcttaaggcctcacttgaaggtaggtaccagcgtcttataaaatagctccatgggc  
ggggtgggagataaacatgttcggggaagcagcctagcgggtatcagataaaaggagaatgacttaacactcaattgcttatacggtgaa  
ataaaaaataaacaacggaagcaaaaaggatgatacaaaatgttttttattcttctagctcgttctttagacactacgatggtataaa  
cacagatataatgtcattctcgtgtcagatcgggtttgtttatattgtcataaatgtgtactcgttagtatactttatataacaatccgttat  
aagaatggaatagtaactaatatcagttaatattcataagcttaaaagggtgtttaaataatgtaaaacaaaagttggaatgcaatttcttt  
ttgaatgcagataatccgatcaaaatattacgtatggttattgtactaactatagaagtcagtaacatcgaaaaatctacaaaataattatata  
gggtgtgtgacagtcaagattggaagattggaagattgagtgatcaggctaaataagattgattccttagtcatttcttttagttaatcaaatcgcta  
gacgtaatactatccttctacgtagtactgaagcagaccagttctaattggacaattttgtaattgtacttagtactccactcaatttaccattctcatga  
cgtgtgagatttctcccgtgacaaatataatgattgaaagaaaaataatctcatttaacgaatttattgagccccgaatttcggctaccaattggtt  
atctttcttgatccaagcagcagcatataacaatagtgccagcaaatcattctttgacagtgctcgtttcacgcgatccattgttataaattagac  
ctttcaatattttgttaagtctaaactcttataaaggcttagactcatgttccatgggttgatgtattaagcatcgtaaacatcttctcaaat  
aataaaaactgcaagttatctaatagtcttcttagttcaaaatacagttggttggcgaaaacctttttatttcacttttatttccactattttgaa  
aatcaagtcgttagcaaaaagcaaaccaactaaatctcaccattctcgggtgagttttaaaggagatgatttcgactatggaatttatgttgc  
ttcaaatgaatggtctccttcccttagacaaactttgtctgacttttgcctaaattagatttcgtaaattcataagcaaaataacaatgataaaa  
aaagtaaccatcactcaataaaagaaaagactgaccgatattgtttacaaagatagaaaaacaatacagagcatgaggttatagccaaat  
caagtcattgctgaattgattatacatagaattaaacaaacatgctgcaaaaataaccggaaagaaaagctcgatgaaagctaaaacgc  
ttcgggaaagggaaggaaaaaaattttccataacctagagataatgaaaaaatgaactcatttctgggtaataattatgttggtatttt  
cgattcattactcccttgccctgaaatccaaagagctattcggctcttactacaacatcgaccggaataaaatccgcgataaagctaaaatgct  
gatatttgatgcaattacttggtatttagactcaaggtacaatggaagattgtttggtcatcaatatcaagattagttgaggagtttcaaga  
tatccctttccctcgtttttgttttacaaaacgtacataagataccaagcttcaatctttcatggtttctgaaacatccagttgttagcggaaatc  
aatccattaaagaagcaatgacaggtttcgtcaccaattgtaaatcaatctcaataaaaaactccttaaacagtataccaatcgtcactggt  
tcatttgggcaaatccataaagcagcctggaaagtcaaacctgaaagactcgaccacgcattataacagcataagtaattgactccatgca  
aatttgaatgaaatcatgtgctggtcccattctgaggtccaataagatatagatgggctgcatcgtttagaatgcttctgtcaaaacactagta  
gccttcttagtaaatgaaaaaagaaagattgctcatcattcgttccgtaagacttcttcgcaaacatattcttcttcttcttcttcttcttctt  
ttcaacatttctaccgagatgaaggcggatgcaatctggaggtgaaactacgcttgaagaatcatcattctgcgactgagggaattgc  
cagaatttgaacacgttcgtaaagggttttcatagtttcaataacagctcaaaacaacaaacaaacaaacaaacaaacaaacaaacaaacaaac  
acagcatagagtacaagatatttccggtaggatcagccacgaaaaataaaatctttttatttcaataaaattgaaagaaacacttttaaat  
atgtcgtgtgaaaacaagaaacaagatacaaaatcgatattcgggttaggtttcttcttactcactcattcgttgcctatggaacaaaagaa  
acgtagcttgaattcgtctaaaccgataaccctttctcgtgatttctgttacaaagttgtccttatttatgagagcaactatgaatcaaccaac

gttacctattgactttgtaccgaaagatattaatgctatgtttgtctacttgaatagaaaaagcatgctgcatagtcctactgtttcgaattattcg  
ttgtagtgatattataaggattttgaaaggtttatatagtcagtgaaatgaccatattagggagaacaattacaaccgtgaatggtataagtcag  
gtaattatacagtaaatcaagagttcattagacttatagttactttatctactaagtattcttacttgactaaacgaggtggataaatgaaca  
aattaattagctcgcagtgtaaagggtataaataaaactgtttgtctgagtcagaatttgagattggaagaatggacgggttaggctgaaaagt  
ttgctttttctgccctcatttagttttcaaatccttcgatgttattactattctttacatagtagcaagtcgtccacttgaaatataaacactact  
gtctttgtttattcccttcgagatccattgtttacggcgtagcatttctgcatgaaattctttcttaagaattctgttgatattctgtacctttttgt  
tatttgcacacaaagtatagcagcaccgagtgatagaaatagctaaatgcttaatgaagtcgatggcagccctaaatccactttctgcattatt  
tgacatcatggaggacctggtgtcccagctaaaataaacaacaaaactgtaaacacctttcattgtgacttatagttgatacagtcgtct  
attctctcgaatcctcctatatacttctttctgctccccttttcaagaatgattcaagattattacgaaccatttggaaatcctcgtgctgta  
tgattcttagcttcttaagcctttcatagctgacttttagcaggcgattcccaggatcagtttgactcgtttagaagcaaattggtgagccttca  
tgaagccttatacctaaactccaggagagactcgttcacgagatgactgtctgaaattcgtgggatgttaacagcttggaccgaaatata  
ccaaagatctactaatatagaagatgaacaatctgggctcgatgtaataactatggtggagacagtagggaaatccgggggtcgtcagtcctttt  
tatttggaaagttttggttctttataaacctttctcaatttctgaaagagatcgattttctatactaccgcagaatgttacctgtgaggt  
gacgaaatacaaaaatgtctactcgcagtagtaattcaatagtcacattttgttattattaagggtgaaccaatcgcatacagtcctaaagcgatta  
gaacgatctcagatgctgtcccaagcataatgctttctgcttttatacaacaaaaaaacacctattcattgcttttagtggcgat  
aaatgcatgcatgctttttattgtccattttctcgtcatttcaattcaattgatacaggatagtttctgtatcaatatttaaccgcaagaact  
taaaaaggacagaaataaatctcgtcggaaataaacgcttgaatgtctttttccacttagtacttcaatcggaagagttaaagctcatg  
ctgaaagaaaggtaaacaaattagccgtaagttgagtggttaggattcctcgtcaactctatttctcgttcgtaatcgtcggcgaggagctagt  
gcatcatccctttgtgatatttggcagcgtaggcaaacgggtgtttcagttgagcatttgatcacgaattcaaggaaatgaataaggatgtgt  
agaatctcaacagatggcacaatgaggaattcaagatttaaaaaatttctcaaaggcagcccaagacctttgaaattatctggaagcca  
acctcaaaaccagccacaattaaaattacgactttaacgacaatcgtactatcataatgatacacaatgtataactaggctttattagtaacata  
cattctaataacatttgcgattcacaataactccacttacaacaaaacgcaagtagtgaagatacaaaaaggcccgatcgtagcttt  
ttcaattaataacttgagtagccaagaaatgttcaaacggtaggcagctgcaatgtacaagcattgataaaaaatgtcaaaatgtaaaac  
ctgcttaaatgttcaacgactacatttccaggaaagattgatctacagcttctctataattcggtaaagaaagcatcgaagccgccaatcattca  
ttaacgattttatttttcaacgtttttggcttgacagaagttgaattgaaacgggtgtttatgtctctggtgatacaaggaagtccttttctg  
agatcaatgtcgtaaacattagcatggtgttttggggaggcggcttgaatcggattttagcttcttccgaatcctcaaaataaataaaaagaa  
attcaatgtacaattagcaaaagaggtgtcaaaaaaaagctttagctgtagtgatgaaacaatttgcgaatcactacgaaaagcgaa  
attgaaaggaatgtagttcaaatgaactcaacttcaatcttattcaaaagcggctcaataaaagttcaaagcagtcataatggaatgaatgcca  
gcagcaggaaattcgcacgctttttggtcaggatagcaaatgtttgttacgctatctctataatgattcaactcgaattgttgaataacggt  
tgaatcacaataatgcaattaacagctcctcataatagtttactttatgaaggaaagtagctttttggtacattagtcgcttaagtttccataata  
aaaatcttttagtagaaattatagaaactccagaatgaattgcttaattttctaccatttaagctttttcaaggtcggaaacaaaagcagcc  
cttatttaaggcaggaaataccaacgagcattccttgaatctgaaactgtttacagttaaaccaagacagaaataattcttttccatctaact  
attgcagtaaaaaataggttagtacaggactagacagacgggacataaccggcagcgaatttcaaaatcagtggaagaccgcagggaggtgaata  
aactcgttaataactgcccacaaatatttctcgcagagaagcagtagtcggtagtagcaaaacgtaaaactacaaaagtttctgtacataaaaa  
aacaataactactttatcacagatggttacatcgtaaagttgattaacattagtcgtaaaacttatctaatacaagctaaaggacataatctga  
gaatcgtcgcgtaattaaagtaacaaacgattggataaccattatacagaaactgtgagtcgaaatcgagagtgaaataatttgcgtcgcact  
gtatcataagagtcattaaatccatgagtagatcagtagcgaagtaaaactgactttcagacatttatttagttaagcagatccctggatattactagc  
atctatatacgtatttccgggagcagccaattcaaatctacagcaatacaactttagctgtttattccacccaaagaacataactaaaaaatgtaa  
gttttgcagtgacggaactttgctatcgccgttagtataatttgtaaatatctgggacttctctgacagaaaatctgagacaataagacaggt  
ctaaaaaacatgaggaactcgttaagtgaaatgataagttatagttagcaaaaaacctttttttcattcatatacaaaaaaaataaaaa  
aaaggatggatggaacgagcgggttgccggttgactagcaactgtataaacacctgacttgcagtaggataaacggtttatgtagttc  
caagtcacctactaaattggtttcgtttacctctatggttgctttatacagactgttcctatagcttcttagtttcacgagctgtgatcactact  
gcttcttgactccgtcagaatggaatcaaagctgattgatccatttataatagacaaagaagctgttccaatccattttgatgtttaccag  
ggcttctgaaaatttaacattgtcatatgtcactattggattagtgattgaagacgaataaccagatttcaaatcacttaccatacagtagc  
aatggaagaagtatacaataaaagcgaataaacaatggtgtagagaaaagttcatgaatcgagcaagtaggacagaggagactcag  
aagaagaatgcgcaatgcaaacgggtactttatccaaccaaggagtagaataatcatatgcttattcgtttgtcgggtgtcttaaatcaga  
aaatccagatgctctagatataatagaatccatccttaataatttctacaataatggcttctcctgttcaacatagaaatcaattttgatgaga  
caaacctattctttactgaaatattggggaggcggtagtgatcttcaaatgctgtgaaactggaatgaccaatgtttacttctgtggca

tcgtctgcatttaaatcatccaaagaagtttgtaaagatcatatgtttttcatttttacatgtaaggaaagtgatagaggcttcaatttacacgc  
ttgcaaaggtacaagagctaaggaaagacagaggtttacstagttgacgttcaaattttttcagagatagtaagtattatgttcaaaaaagcaa  
aagtataataaaatgactaaaggattgagcaacactgctgaatgggtgttttcgcttcaatatttataactagtgaagtttcgctgttagtaaaat  
ataagagtactgattctccaatgcataatacgaagcgtatataacacaagtaagcgctacttcagagcatggattataggtagatgattttctg  
taaataaacaatgaagaataatagagagaatgaaggaataaaaataaccgggttctaaaggaattcataaatgtatatattttcataaa  
aataaaaaacaatagaagaacacacaatcgatttcagatacactattctatgatagagaatcctaaacctagggagaaggaaacaggat  
cgcttctattttactatttcatctacgttggtaaactgttctttagacgtagaccatctttcagcgaacaattgtaaactcttaggacag  
aagtgacatggcagtcctcgaaggaaatgaacacaatttcattcgcaactattaatgttaaaagtgttacctccgaaaaccgtgaaaacagt  
gttggtccatttcaatcttttgaagaattgtctactttttattttttctttggtttttgtttatgtttatatttttaattacattctcaactc  
ttagacacgtttttctcttatcttcttctccttaaaacgtgcttcttctcgacatggaccccgtttcttcatcatcgattctcgtcgttctccg  
ttttacgtcattatgagatcattttataaacgtcatataatgacatcatgattatcgtagccacatctaagttttttttttctcggggtagt  
atttttttatgtttttatataatggaatagaggaaacttgaatctatcagattgatggttcataaaaacaaaataagaaaaagttttttgttactg  
tattttccctacttcttcttgattttttgctctttgttcttctgtaacctaacggattactgttacctatgacctaaactattcgaattacctc  
gtataccaacgagagctgttgcacgaatgctttaccatctattttagcgtccctttctcgccactagaacgctgctccactatttctagttaaagt  
ttatctcattgttttgctctatttaaccgtactcgttcttctacgattttcgactataccgttagatcgcttcgcttggtaactttgatgaatttcgct  
ctcctttatcagtgagctgctttaaaccgactctttattctttttttgactgttttcttaccaaagccaaaaccgctgtttccaggttcca  
attcacaattcaaattggatactttcatagattccttctttagctcgtgaagagcttttggttgctgctgtttttcgacctttttctgttcaactc  
tgtttgctgcgctgggagattaagttcttctgttgcctcttctatataagaagcgatagaattgttttttttaccattttttattcgcattcactggatt  
tcaattttcggtttttattctgtcattttttcgacctctcttctcattcctaagaatacaatgagcaattgctagaacgcagtgtttttttgctt  
cctaataatcatatttagattcatcgatttagcagccgatttgaatactgaaaattcacttgaattatcgtttctcaatcgatcgttttggtat  
aactgaaacaaagtacttttctatttatttagatctataacctttctttctgtttctttgtgtataccatcagggtttctgaatcttatttctt  
ttgattttgttagatcgttttctttttttttcttctgtccttttagccttctatacctttcttttctaatctcattccttaaccaattctatcctgt  
ttaattgttttccctttttcgcaacacacgtttttatgtgatttacagcttctcagatcctactgaatattcaaatccttgccttgttcaatcaattc  
tgccaaggtatataaatatataatataatccttactcgtgttaaagataccaaaaagatttcccttaaagatttgcattttattttgcataccca  
tagcataatttctattctatcgtcttctcttccgcttctgttttctgttctttctatattgaaattggatctcattcgttcaaaagcagataa  
tacataactaatgtccgatttcaaatttgaagctgctactgttacaatggagcctccctctgggtcttgcacggctgttgcctaagagctatcag  
accaccagcaaatatattgtccgttctcctcaaatctcgtactatagaacacagagaagcacagtgatgtccttatcattgacttgcgtcctg  
tatccgagtttcaaagaccgcacatcaatggctctgcaatctcacttctcgtactcttcaaacgccctgttttctgcttctcgaatcatcag  
cactttaaaccgatgctgacaatgtttgcgaccttctaagggttggaaagacctttctgtatctttgtttgcttcccgttgggttgaagcatatt  
actattgctgagattatcgggtgaaaattcaagaaagaatgcttttcaggtacttttggcattttggaccttgactacaaccgtctgcaaacact  
atcccgatttgattgatagaatgcctatcacaataaaaatggcggttaacactagcattaactcaaaataaactttttgttctcctcaaacgtccct  
atatctttgacaagcaagggtctgattctttccagtgtaccccgcccaaagataaagttgaaatgcttcttgaataagttttctgtccgat  
gcccgataagtcaattaataacgaccccttccgacacccctcttctacagcataccagatgcatttcaaaatccaaacgttacaattttgtatgaa  
aaattttcaagtttggagtttctgaacaacaacgggttggcttgttgcgagataagaattcgaaatgggtgcaggtcgattcttctcgaacttaa  
cctataaaaaaaataggatagcagattgtgcctataattgacgcgcttcaacttaaaaaacaagacacaataaaggacagattatatt  
aatgcctcctatgtcaacacagctacctcgaatatttgcctgccaagcttcttactctctccttagaagattttggcaaatgacttgggacct  
tttgggatataggatccattgttatgcttggctcttttacgaggcaggtcgtgaaatgtccgtcccttattggcctcaagacgggtcttttctgc  
caaacgtatggtttgtatacggtaacccttttggaggaaaaaacatcattgacagcgggtgtattttacgaaaacttgataaagacgaggaga  
ctcaactgtctgaaaaaaataaacctttcaatataaaatggaccgactgtaattctcagaacgtgttactatgatgattaatttcttgaaa  
cttgttaactttagatcgtaccggacctttagttgtcattgttctgctggttggctgtacgggcacatttattgttttagatgctcttttacgct  
tctaatagagaagttcagtggttttaccaggtacagatgtcttctcagatgttatttcaacagattgatcacgtaagaactcaacgaatgaaa  
atgggtgcaagcttactcagtttaattttatgacttaatagatttctacagaaaaacaatacacaattccagttctatcataactgtttgtt  
tttttttttttttttttttttttttttttttttttttttttttttttttttttttttttttttttttttttttttttttttttttttttttt  
tttcttttgggtacctgtttttatggaaggtttaaactgatacaattttgatttttaattgttttattactgtactttttgagcttaataatga  
atgtatttttgaattttctatataatgagtgatctgtggcttacgatcttccctgtggatgttagatgagatagcattaggtctagtaaatat  
aaacggatttttcaaaaagcagagaattgtaagtttagctttttcactactcctttagatctcatataacgtctactattagaaatcat  
ttcaccatgattatcagtgctagcacttacgcttttgatgataaaaattaaaacggttaaaaaagaatgaagttacaagctttttatttctttg  
taataaaatcagtgtaactagtaaaaattgcccagagagaagaatcataatactagcaaaaactcgtttctttaagcaggcttaataaaaaata

aagcaagcgaattcagtaacctttatattgataaggtgaagctatacatcagtaagctgctttgtcgtctaagatctcatgtacaatgcacatagtt  
ttctatcatggaatgcaatcccttaaaccttcagataaatcatgtgcaaaattgtaactttgattaccattcttaatccgattcattaattgactcc  
atTTTTgattgccaacatatattctccgtccatagtagccaggttgactttcgtttcagcaagcagttttcctttctaaaaagttcatcctcaatac  
ttgtccttccgacataatTTTgagattttctgcaattatagcttccatctcacttggaaagacgattcaacttcggatctgattttgaaagctgacc  
atgtaaagaagcgaactttgactccattccagcttgctctctgcttgctttaaaaccaatTTTcctgaactgacatactggacatgcttctgtg  
ctcaatttgaatttggacatagattcactcaacaccgagaagtgatcattcaatgacttgttagtttctctgtagttccaattgcgtgcaacttc  
tctctctgtaataaagatatatacaattcatgtccatacttatctatggaagacttggagatttcgaaagcaaaaggcactgtaatatcttggtc  
atatcatactggtcaggtcgtcgtccagcataaaaggagaaaatattatccttcagatatgttataagttcatcattttaattcaagagga  
TTTTctcgtattatTTTgcaatccttagaccaatgttagtaaaatagtaggaccgtagaaaagcaatatactgtaaattttggaacgatatttag  
aggaaacttatatgcaataaaagtaaggaaccattcagacgcataagaacaagtatcaatctcgtttttcctcaatgaatagccaagcgggc  
ataaaatcttccaatTgagtaaattgatacatgatacgaactcaaacctttcaactcaggagagaagatactttgtagattatactccttaaaaa  
gaaaaacgagcattgaaaaagcctgaggaggaggtaatacattaaaagagatccagcgatccaggacattccttgggtataaccgacttcag  
gaatagcattcgaagagatcttagtactttgtgcaattggcaattgaatcagacacaatgtcgggagacttttggtcacggtttgaaaaaaagc  
gctccaatatttcaggagggaatgttctgtccaaatctttacgtatagctttatcagattcgcagctcttcttaccaaatcagaatattgacgctca  
TTTTcaaaagaggaccaagctgaaatggacttcataagactgtatgcaccccctgaacctcatggctgaaaatcagatcgtggatctctctgac  
ttctccttaaaactttaagtggttctctataaattcgaataaaagattgtaaatttctctgaaggtatcatgtgacgttcagctccaagaaattc  
attatttcttttccggttgcataaattgaaggattctttgcaaggacttcttaataagaacgaggtagttgaagaaacatctggactcaa  
atcactacgttttagagctaaaccaagaattgcagaagacaccggtgaagttgctcagcataaaatgaatcatgtctaccacgagaaatctgt  
gtacttggctccaagctaccaccattatattgagattctctgtaagtactattagaagaccttgatgtattatcaagctccaacctggaaaagcgt  
cgttcaaatTgcatatcggacgcaggatcaagtacaaagtaggcaattcatctcggataatcattagaagatcttctcgtggctgtggact  
gctaatattgacatccgattttgctggaaaactcaaagaattctgattttcaacgtcacgctcagaaggctctattcgtgagttgaatttcaaaa  
agggttagatgtagcttgaagtagcatctccactttcaaagaatttagcgttaggttagttgcttctttggagcaacagacaagctcttcat  
TTTTgtgctcgtttcagcgtctcagatTTTctttccttaccattttattttcagaacaatatcaggttcaattctgcttcttctctatgtgtg  
atTTTTgagatccattagaggctatacttgaatattctctggatgttctgagagttctttcatgcaagcactgtcagcatttgcttcttactctg  
aggagtagcatttgcaatcataagaaaaagcatTTTTcggattttgaagaagaagaagacgccgaagaagatgctgaaatgttgacctt  
tatctagttcatcaggtttccaatgattgactgttcatctttcattgactctcatatattctgatcttcaaacgataaaatcgttccacgcttatcg  
gattctccttattcacttcttctgttcttccgtggctttgtggatcgtttgtgtgctgatacatcattggaaactTTTTcttcttcttctggt  
gaaatgtaatatcttctcatgttctgagtttagggcggcttctattttgagtgatccatgtaactTTTTcttctgtagtagcttcatctgtccggac  
tcggaatTTTTctcatctccaatccattcaagtcttctgattttacttcttctcatcaccttctccaagcctgtcctgcccggctcatcaaagctt  
attcatagcagctttatgtcttcatctgctgaagcttctgaataattataaattcatcgtctacatcatctgaaaattctcataagagcttgagc  
agctatttctagcacattatgctgatcaaagaacgaatgatctccatctttataggtatcgtcgttatggacagaactatcatgggaatcattgca  
gaacgttccattcatcattagtttcaattcatttttactgtatcttcatctgttttctcatcgaccatactttagtaagttctgaggatgg  
atgtctgtttgttctttggtgtcactattattataaaacaaagcgaactTTTTattagaagcatcaaatacaattcttctgcccacatcttttcta  
tattaacttcttaaccataatggtttactaaaaacaaattgatactattttgcaactgtttgaatgcaaatgtcgtttctctgtgtttgtttacatta  
catacagcagatatacaaaaaacataaccactactctcaacattttgtgtgcacagcaactgttactattcagcgttgaaaggtatttttta  
aacttgagactttttattattatggagacgaattagacattcttctgtgctgattgtgaattcttcttccgtgtattcagacataaactgacta  
cgttttaggcataataagcatgttctaaagctgtgttgatacttttcttcatctctgttccgtcgttgttttctatttctacaccttatatatcgcaa  
tagttgtatatattgagaaaggataatTTTcatcagttttctatccatTTTTTgttaatgagctttttgtaaggatccatgggaatattaagttc  
agtaagcttaaacttctcgtgaaatcaattctcagtcgacaagaatggacaccggtcgtcaaatattctaccttactgaagccggtagttgct  
ttgtttgttcaagcttagtgctgatacacccttgagcaggaaaattggcaattaccatttctcatactccatgcagacattgtttatccc  
atccaagccactgttgggtgcaaatagaggttaattacgaagcttactagggacaattattggattaggttgggcagttgcttcaaagTTTTgg  
caatcgttgcgaaccgaaatggctattcgggtgcagcggattggcaatttcttgccataggttcttcatatccggttatattcgtagccggtat  
ggctatcgaaacatgtgcatcatatggattttcatagactgcttccaatgacaatcgatccttatggaaagagttccttcttcttctatacaag  
ccttgtctatcttctctgttagcagcaggtgtggtgttttggcttatttattcctccaacaaggatggcatcagatttggtaggaagttccgc  
gcttcttatttgaagagttgatgaattgtctaaatggctgtttgcaaggattttccttcatgtaatacaagctcacttctgattctctcgtcggaa  
gagatcgccttaccagttatcgtactgttctccgagaccgttcaacaagtttctcgtcagatcttcaaatccagttttagttgaactttcttca  
tacctataggcgtcctcaaagatttagaaaaagcacttcaacgtacttcccttactatgtctcgaatgttgctgcttgtgtatctttgtacagagcg  
ttcaatttcagtcgatccacaactattccgaaagtaaaagtttagcgttactcttggagaataatgcttattgatggaatagactccgactgtt



cacaccacaatttcgcttacaaggtagtcttcattcgaatcctagaccgcagcaagcaagaaatcttacgacatatcttgattttctcacia  
aacgtgaatcatatatacaatagagtcattcttcttacaacagcccataggttttctatggttgattcatctccaccagcggttcagatga  
acaactattagaccatatctcatctttgagtgagaaaaatattaagaagtgaaactataagaaatgctattaaaatggcatttgaatttagtcg  
atgtaatcgaacttttactggtttatacaaatctgctgctgatgaagatgtatttgcattgcatattatcttttaaccttttgaagttgcgaaaga  
gacaagaagcttttagtaatttactgtacttgaaaaatctgcacaaaacgacggaagttctattccatactttcagcatgctcaaggaaag  
aggaagaaatcatgatgagcttcaaatcttcatgctcttctgcttccaaggcactccagatagcgagaattctgttgaggaaatagtagctcg  
ggcgaagaacataattgggatgatgatagcaagataccaagagtttgaattttataggaaaaatgaagcaagattgcaaaaacatcgctgac  
gattatggaaagtaagtcattggcttatacagtccaaagatgtgaaataggattaaaaatggcagccggaattagttgctgagtatagtagctt  
tccaacgatctacaactcatgattatggaaagtggaatggtcaatgggcattgatttctacactgtacgtattagaggttactgttccagctactcg  
cgagttggattcttgcagcttgggcacttctctggtgctgtttatgcatatgtaacatgggaaatagctggtgagttatgttattgctgag  
cttacgttttagtctcctggttctgttattgtatgcatgtatcatacacaatagctggcgttgcaactgttttaataacatttccacctatttata  
ggtgcttattggggaataaaaactctacttttcttggcagattccgttctctgtagtgatagttggcattggcatggctattgtggtaaacact  
gtacttttccatcttctgctgacgtgctcctcaaaagaaataggaatagctgtcaattaaactaaaattatataacacatgtcagaatata  
gttgagttcgactcatcatgagcgcaagctatgtgaggataggaacgaaattatatacatttggtaaaaggcaaatgatctttgatgctt  
acaatatggaattccgactaaaaggacctttccaataagttattcagcaactgattgacaaactgggcaatatggccggggcggttggtggt  
cctgaataaggaagagcaggttgggcttattataccaagaggtagtggaatgtcattcgttatcgaaaaactgattgcttctatataca  
cttactatgtatatttctctatagcattatagctaaatcaccggttccctatttctaccgtcttcacgaaacgccattggaaacctacggcaagca  
attatgaaagacatacaaataaaagcggatatagcaatgaaagcaacaagagggactcgtctccgacgagctagtcggacggcattatcgg  
cggccttatggctcatggcaatgaagggtttgtactactacgctgagtgcaagtaatagaggagattgcaatgacttggaaagatttactatt  
gctggtaaagcgaatcaaccggagaagagaaaaagccagaatttgaacgaaaaatgtaaatagttgtttattctacaaactactgtttttga  
actacatagattttgtgacagatggtaacaaatgggattcaatatacggacagcgaagcacaatttttaactcgtatcttcaatacattaggaa  
aaagaatattactaaatataatttcgcatcgttgtagcccatagcaacaattccaataaaatgactgtagatataatgattcattaaaagc  
acacctaattccaacgaactctctttgctggtcgaaccaagccttctaaacaatgtagaacacactaccatgcaactgcttaagtagctcttct  
ctacttaattctactccatatttattaccctcattattcttccctacaattcacacacaaaactctccggaagcaaaaagatgaagcatc  
taaatcattatggagaactaaatcataaagcattattgttaatgcaaccttatacgtcaccatcttcaaaccgggtaaaacatgagtagca  
gggaaactgtggttaaagcgttacggatagcagatagtaattcttttcatatcatcggaaagaggaaacgtaaaagaaagtagacttgatg  
cgttgagggtgacagacttgggaatgacagaggtaccacgtccgatggccaagagactgacgacattggcaccgtaacacatcaccttag  
aatcagcaacttcttaattgtttggtgctcaataagcttaggaatatacagtcgtagagagcgttttggtaaccgaagggtgaataagcagttac  
gtgaatgagcagcttctgtgcttcaagatagctagtttggagcaagaaggatgagctccatttggtaatagaaggcttgatcttggcgac  
cttcaaatgctcgaaggcttcatcgtgaagttggagataccaatgtgcctaacttgcagactcgacaagcttctccatggccttccatggtt  
cttcaagggtaacattctcaaatataaattgccttctccttaggaaacttctcagcaccagcttgaagcaacaggccagtgataaggt  
aacagtccaagtaatcaagcttcaactcctcaagagtttcaaaccactggagacggcttcagggtatgagcgttgcaccacaacttagaa  
gtaaccagatgtctttacaggaatgccgtttcttataaccatcaccgacttctctgcttaccgtagatgtgagcggcatcaatagacgat  
agcgtattgcaaagcagcttgcaggttcttagtttgggttgggtttagattgccaagtaaccaaaccaagtcgggaaatcttatcaccgttga  
cagagtgaagtagcttctgtagccttcttagttagtcttggacggacatatgcaactattgaatcaagtaaaacaaatctcaaatccacgtt  
ctattgaaatcgttgcggatagtgatgaaaagcagttccgggttaaacagggttatataatgctcgtgaaagggtgctacgtaagcatgac  
atcaattatggagaagacaaccgaaactgaaggaatcgaaggaaacttgcagtcaggagagagaagagggaatcgatcgaaccaag  
aacaacaaaaaaaaagggaagttcaatgcgttccaatcgaaggacaaacatattccgtagttttcgttgatttttattttcgcgttgaatcattc  
gatcggtttctgctgtcttccaccgtcattctcatcctcaccttagtagtctcatgatgctacaattccatacgtttcgttggaaagctaaagttgag  
acttggaaacaaccaagcaatatcaagtaaaatagaagagaaaaaatcaataaaaataacagagtttcaataaccaccttcttccaatc  
gacgagttgctccacataataatgaatgcaacaaaaactcattgggaaattcgaacaacttcttttgcaccagtttctaactcgtttaaatt  
tctctcagtgcttctgcttatttttttatttaagatatttagacgaagggatactgtaattgctgtagaatgataaccagttacttgggggaca  
tacaagtttcgacgtcacttggctacgaaggaaaaatattacaatcatcatttgaacctcacaacaaatattacattcattactatcaacaaa  
caaacgtgatgacatttagttgcaatcaattccttggagacgtacttgcaccttctgccaatggtaacaatgggaacaccagtagcaagct  
cacgttgacaatttctcaccgtaagacctccaagtcctgatcaaacgacggagagagttaccgtggggcggaacgaaaacctttcacc  
ttgaggatgtggggcaaacagtagactttagtagggcaagacgctcagcgtgttcttcaaagattcaccattagggggagcaacgtcgt  
aagaacggcgcagatgagaacttctcatcacccttttgacgagcttctgcttcttcaaacttggaggtcaccatagaaacgctcgttaa  
gcttttctccttgatggtctcaagttgggttgaccaactcgttggagacaatctcacaagctttttagcagcttgaagagaggaggtgaaagc



aaagatcaagttcagtgctaagaaattgtcctaaggacgaaggaatgtagtcagtc caatctactagaagcttaaaaaaagaaataaagaaa  
aaaaataaataaagaacttaataagaaaaataaataagattgagtgaaaatTTTTCTCCTTTTTTTCTGACTGGGATGAATGTTAGCAAAAT  
CCTGTATGGAATGCTTAATGAGGAATATATATAAGAAAAAGAAAAGTAAGAGATTCTATAAGTTCTAAATCTAAGGTATATCATTCCAGAAG  
CCATATTGTTTCTTTGCTGTTCAATGATTAGTTCGAATGCGAAGTAGTTGGTTTTGGATTACATCCATCCAAATCTAGCTTTCATGTAATCCAGGAAC  
ACTTTCAGAATAATGATTCAATAATGAGTACTCTCTCAATGAGGATGGATACTTAAGATTAATGGATGCCAGAACATACCCTCAAAGTACA  
CTGATAACTCAGCTCGTCTCGGAAAAACAATCTTCTCTGTAAGCTTTACTTAAACAACAGAGAAGCTCTTAGTATCATTCTGTAACTTTGA  
AAGCTAATATGATTCTCATCACCAACAGGTTGCACATCTGCTTTTCTTTTACATAACCAGTAATACCACAGATATTGACTGAAATGAACAATA  
ATATAATCATAGCCAAAATATTATTTCTTTATCTTTATGATTCTTTCAGTCTTTTCTCTCGGACTTGATCCAAGTATTCTTTGGCTAGGCAATA  
ATAATAAGGTCTATAACAAGCGTGGCTGTATTCTTTTCAGAAAAGTAGACTCTGCTTTTTCAGCTTTTTCAGTAACTTTTCAAAGTCCGTT  
AGTTTCTGGTACACTCTTAGCTGTAACAAGAAAATCTAGCATACCAAGTCCAATCTAAATCTCCATAGCGACCTCTCTCTGGGCCAAATCT  
TTTCTCGTGTCTGCTGCTGACTCTCTGTATATCCAATCTTTTCTTCTTCTGAGCTGGCTAATTTTTTCCAACCTCAGCACGCTTACTCGC  
GTTCCGACTGTTTTACGTTCTGCTCTTTTGAATTTACTAAAGTCCAAGCAAAGCACCAACATTCGTTACTCTTTTATTTTCAGTAGGTTCT  
CTTTCTTCTGTCAGAAGGCTGTTTATCAGCATGATCATTATGAAGTGTGACCTTCTGTTCTGTCTATATCCATGGAGTCATTGGTTGAAGTTCAT  
TTCTTTTTCAGCGGATGTTCTTTTCACTATTTTCTCTTCCATCCATAATCTTGATTTCTGTTTTGGCAATAACCAAGTACTAAGGAATGCG  
ATCTTACGTCGAAGTGGATTCTGTATACAAAAGCACCCATACTTAACTACTAAAGTCTTGAATGTTAAATTTGAAAATAAATATATTTT  
TATTTATTTATAAGTATAAAATTTCTATTAATAAATCATGAATTTCTTTTCTACTAGGCAACGATGCATCTGCTGTGTGCAAGTGGTTCTAGTAG  
ATATGCTTAGGCTGTCTTAAAGTTCTGACTGACTGCTTTCTGAGTACTTTTCAGGAACGAAGTCATCTGGCACCTCGACAACGCTGAGTCTT  
GGCCTTGAGTGTGACAATCTGTTTTACGGTTGGACGATTGTCATCTTCTGCTTCTGCTTGCATCTCAGTCTTGAAGCTTCTGATTACCAGATTTA  
CCTCGAAAATTTGTAAGTCGGAATTTCTCCAGCTCAACTGATCTCTGTACAGAAGCTTCGATAGCGACCGATTACCCTGTATCTGTAGG  
GTACAGTACAGCGGACGAATTTCTGTGATGACGGAGGAGAAGGAAGACCGAATGAAGATATTGTTGTAATGATTATCCAACCTCAAGTCT  
CCTTCAAATTTAATGCTGACTGAAGCTTCAAAGCTCAATCATTGCAATCGAAAACCTTTTCAAGTGTTCGCGGCACGCACAAGACGGAC  
GCGTGTCCGTGTTGAAATGGAGCCATACGTAACAGATTTCCACATCTCTTCTGACTGAGAATTTGACTCCACTGTGTAACGTTCTCCAA  
CTTACAATTCGATTTGACAATAAAAAATCCGAAGCTTGAGCATTCTAACATTTGGATCCTGTTCTGTGAGATACTTTGGTCATAGCATCTTGT  
TTCTCGATTTCCGGAAGAATACTCACTGAAGCTTTCAGCTGTATCCGATCTATCTACACAGCAGAGCTTTTCTCTGGGAGCTATACCGGACGTGG  
CAAAGGCGTAACAAAATTTACTTTATGATCCAGTCTTCTTCTGTTCCGATTCAAGTGTGAGAACATGTAAGTCTGGAATTTTTGTTAATAAT  
AAAGGAATAACTACCATAAATGTCAGGTTCTTCTCAGTAAAGGCGACCAATCTGAAAGTGGAAATGTAATCTGGGTTAAGAGATGCAAAG  
AAGGAGTAAATAATGAGGAGGAGATTCAAGCAGGACTGAAAATCTGCAAGTGTGACATAAACCTTCTACCAAGAAAATTTTTAAAGAA  
CATCAGTGGGAGCTGTCAAAAATACCAACTCCCTTCCAGATATAATCGATCTCTGCGAGCTTTTATTCTGCAAGCAATCCCAAGCTG  
AACCTTTTATATTCACAACGGCGGGATTGTGCTTCTGTTTTCCGTTTCAGGAGCAAAATGAAAAGAAAAGGCTGGGGTTGTGAACGATGGGAC  
ACTATTTGATGTAAGGGGAGTCATAAACTGTTTATAATGATCACTGGCGTTAGGGCAAAATAGAAGTCCAACAATAGAATAACCTCGAAATG  
ATTATAATCAAGAATTGATTGCAAAATTTATCGAAACCTGTTAAGTCTCTCAATCGTAAGAGGTCGTTTCCGTTAGCTAGTGAACCTTTTCTG  
TAACCGAAACTGAGAATCACCGAATCGTTGAGAAAACTGGTCTGTACTAGAAGGTGAATATCGAATTAGGATCTTCTCAACATGAACAA  
ACGGAGTATAAGTAATATTGTATAAAGCATTCCAAAATTCAGGCAAAATATTGGGCAAAATCTGTTTGAATAAATTCGCTTTTGTCATTTT  
TGACGATTTATTGATTGTAATAATCCGATGAGGAATCATCAATGAAAAGGTTAAATATAACATTCTGCGGACGATTCTGAAAACATTGGATTG  
CAATGATAGTATTGATCAGAAAAGGAGCTCAAGACTCTATCAATTTGCTGTGTTTCTGAGGAAGAATAAAGAGCAAGAAAATTTCTGAGAGC  
CATATCTAGCGCGATGCTTTTLAGAGGTAGATTAGACAAAATTTCCGTAAGGTAATTTTATAAAGAGAGATTGGACTGTGAGAGAAGACTAGG  
AATAAACGTGAAGGAATAGAGGCTGTAATCGGTCCAAAAGGCAGCGGCGTCTCGCATCTCGACCGAAGGTAAGAAAAATCAGAAAG  
GCTAATCTGGGTCTATTTGATTGACGACAATGAAGCTCGGTGTTCTCAAATTAGCAGAACGATTGATGTTGGACTAGGATTGCTTAAGCTA  
GAAGAGAAAAGAAATTTGAAGACTTCTGTGCAACATATGAGAGCCAAGAGATTATTAGAAGAACGAGAAGGTGAGCCACAAGAAAAGTCTG  
TTTGAAGTTTGCAGTGAAGAACAGAGAGGGTGAAGCAGCCAGCTCTCTAAAGTGTAGGCTGTGTTGGAGAATTTGGAACATCGCTGACAG  
ATACAGGAGAGTCAAGGTTATTAATGACTGAGCCGGGAAAGACGAAGAGTGACTTAAGGAGTGAAGTTCTTTTCTGGGAGTTCGTTCTAGCAT  
GGTAAGGCTTTTATGAAAACGGAAGTAAATGAGCAGAAGTAGATTGAGGAGAATTCGTTTTGAGGAGCGCTTCCAGCGTTTAGGATTGTT  
AACTCAATGCACTGGAACGCGATTGACAAAATTTCTAGATGTCTAAATCTGGACGATGTTCTGACTCTGAAGATGAGTCTACGGCATAACCT  
GGTGACAAGACAGGAGAATTTCAAGCATTAGAGATTCCGACGTTACAGTAAGTTTAGGAGGACGTTTTCTTTGACGATGAAATCGAGA  
TTGAAGAGTCTTTTGGTTTATGATTTCCGCTAGTCGAGGGAGAAGGGGACAATTAGCGGATTCAGAAAGGATTTAAAGTTGAGGATGGTGA  
CTTCCAGATAAATATCATGTTAAGCTGTCTATAAATGTAACAAAACGAAAATGAAGCATATGCTTGTCTAATTTCTTTTTTTTGTGTGT  
GTGAAACCCAGGAAACGCAACCAATAGTTAAGAATAACTTAGAATGATACAAATGATACAGTATACAATAACAAGTGTAAAACAGCTTT  
TGGATTACTCAGAGAGAAAAACATATGAGAGAAATCATGAATGGACAAGAGAACAAGAAGTAGAATAGAGAAAAAACGAAACGAGA

aatagtttgcttgtaaaaaatgaaacggaaaacccgaattgaaagcaaatagagttattatataaaaaccaaaggggctaaaagaagaataa  
gtatctttgtccaattcctctaaagaaaagctgcaaaagctctacaccatagcaataggttagctaggagattcaaggattccagaaaagaatg  
caaagtaataagaaaatgcagatgctgtatgccaagcctaaaacaggtacacaaacaaactagttgggtagtaattgacaggcagtgaag  
gcactcgtgaaaaggcatgacattgtaattacgtattacgtaataatattagcgagtagaggcaacaatcgaaatccacgattcaata  
taaacatagatgtaagaaaagatgggtattaagtctgttatcatattatcttttcatgtaaatgatgggtgttgctgtttttctattatgggcaga  
atcaatctcaccaaaatcgaagatgaagaggaaaaatccgaatcttcacgacattccaatgtaaaaataaaaaacagtgtaataaaaacg  
aataaaatgaattgaatcaagaaagcgaacacttctaactcctacctgcctatcctggtttgccctgctactagaggaatcgaaatgatgtaata  
taacaaacaacgaaaaatggctgaatggaagcaaaggaatgaattcctcagtgaaatggttcttctcatttaagcagctatgctattttata  
ctgattatcataggaaagaagtggttatagggaacatggttgaatacatcattgccagaataaaaaccaagtaagaatcaaggataagtgctca  
ttcttttaatatcttattgatgttttatgcatgaattgaggaggaaagtctcataaaagattgaatcatctgttggaaatggatcttaactgct  
atatgatagaatcatagaaaagcaagaaaacgaaattcacgtttctcaatattctccgtgaaaatatgaatcgaagcttttaagcctataaaa  
aacaatacttttaaaaataattacacagaatcggcgaaatctctatgaccattctgcacgatgctctcatgtaaaaatcgctgttttttagta  
gtttttttgtgattctcgatctaaaattaacaaagaaaaacaaatgttctataaacattacagatcattaaataatcttctgcatgctctcg  
tccgacttgaataataatttacttaccgaaacaggatccaagaaatagcgctacgtaaaaacatgatggattatattcggcattctaaac  
cggtagtagttacctttatacaacgccctttattaagccgacgaaaggtattcttagccattgcggaagattcatctttcagtcgagggtttt  
tactaataaaatcttttactgatttttttttagttttatactctcaaatctctataaatctaatccatactcattgtcgaaaaaaaaaat  
tttaattgccattgcctttcagctttgtacctaacaaggaatcgcttactaatcgacacaattgggatcgaatcacgttcaaattgatataatttc  
taggctttctcttcttcttctgaaactgttcgtgctcatattgactctagacaataactccctggccgatattatatactttttacatctcaaat  
atattctttatcttaatagttccacagacctaattctctgaaatggacttggcgattggaaatctggtttgttacttcccaaaagggttccctc  
aattttcttggttcttgaatccagtttgaatttttttgatccctgctttctttctttcttcttccgaataatattcatgggcccagattatc  
ctttacgccttaccagtcaatattatgtttgattcactgcaaaacgcaccttgcatttaaggggcacttaatcagccgtgactataccggtcgttat  
ggcgtgcccgtcttattaagaaaatcgaaaacgtgattgaaatgcaatcgggtgactgaagaaatgctgtcggggaaatataagtcgccgtat  
acattgctcgggtgcatcgaaatgtgggtggaagtatgacttgcgtacaagccatcagagaagataaagaaggacattatattttagaatt  
gaacgcttcttcttattcgcgatgaaatcgacgctaataatgatcacaacctccaattgccttttgcctcttactgtaggatccttgcctt  
ggatcattatgtttgatccagcaccggttctgttaattataaccttagatggaacaacctgattccgtcatctttcatctgcatgcaattgtttt  
tttttttttcaagttgtgattttctttcacctcttttatataatttttttacctctcttttcaaatctctgttttgatttagacaattcgttg  
attattctggatgtaaggattctatcatcttttctggaattgtttcattcctttttttgtgtcttataattccccttccattgattttttct  
atttatctattcaatagtttactcttctataagcttgcatttcttctgtggtttttgttctgtatatttaggcaccatcaataagcatatat  
aggttttcaagcagatgtgtcccttgttgaacagttctgaaagattatgggtaacaacctgccttcaattacaaagaaagaagaatataattata  
acctattcttagagttttattgttcattgcatgccaatcgtagaatacgacaaataaatgtttatgtggatgattagttcaaaaattcaattac  
aggtagcaatctcttatgttaccgtacctaccatggagtagtgaattgcatagatagacttccaccatataaaaccacttctcccttact  
cataatttaggtgattttcattgcttttactcattgttcttgattacataaatattttattattgacacttccaggcgaatcttacttaaccgat  
ttcaaaaatgtcaaaaccgtttccagtgacaaaaccttaattacaaggtatattattgcatttacaagccgttttctcataccaataacgctgct  
tctttcctgcccggatgaattggcaaagcaagacaatcaattactgactttctagtggtggtgctctccaacatgtttgtccaatcaa  
cactaggcttggcattggtattatcagttccgcatattgtttcgtgtaagttagcttagattccactatttctggtttctcataataaccatttcat  
ctttagggtgctgctggcctgtttggggaggcttaggcttggctcggtaaacctatgctgattgcaatgcaaagcttaaaacatttctctattc  
ctcgagagctctcacctaataactcaaggcaaaaactaaagtaactcgaggacttgttcatcttctggtgcaaccctcatcttggtaaatagc  
tactattcctaactgaatgttggctactttgcaatcttaattattgacgacgtctatagctgtatgcaattgtcctgcatgtgatcaaatgcca  
actaatcaaagtaagctatagtagcgaatgaatcttctactgaattaagatcaaagctgaattgattgtactcttcccttgaacatag  
aaagaggaattccgtaatgtttccagattgactgaaacctttattgttaactataaacaaggaaagctaaacccaacatgcttttcatgatgtt  
atacaggttctcgtgatggttactgagttttctatgaaaagctccaatccaaggaatagatgtaggacgtgtttgactgattgttcgattgctc  
tttgctttaccagattatcaaatatctaaaatggtcgttaaatcatacgcggcggcctacaatgtccttctctgtctcgtcactttgacactct  
ttttgtcaaaaacagtcattcagtagtaggtttaccaataatggtcattgtttacagtcaaaaagtggtcaaagttgatcatcacgttctttct  
taatctccccaccatttactggtttatgaagtatgaaacattgattttgaatttaatttgagtcgaagaaacaattcccgtttgtttatacc  
tttaactcaaaaatggatacgaatattttacctcttaccacagttaaaataatgttcaggcgaactaaatcgtaatagctcaaatttaccat  
gatgttactttctgattttcttagtatctataaaagttaggcaatcttcttactattttgttattctgcttcttcttttttttatttactacg  
ttttattactggtttatgtgggaaataaccagagccgtgctggtattataagtttaaccattaccgctcagaagcttaaaaagttctagac  
gaagtgatgtcattctcgggaaacaaaagaatcgttctgttatttttcttattatggtttcaaattacgcagataaataatgttcaaatat

tttttataattatttggctttttatccttttgaagacgaagaaatccttttgtaaaacgaaaacaaagcttacgaaatcttgcttggttacctgct  
ttgcttaacatatatgacatcaattgaacacttgggtggcgctaattttggcgagagttgatctcttgacgtcatggcgatatattaataaac  
acattcggcacaaaatctgctgtttcctactaccagatcaggtctattttatgcaattgaacgcgttaatattcactgaaatattactacgctac  
catataaaaggaatttcttaggaaaagcagctttctagttaagaattggttgctggagtatagatcataaattggagatccagggttccctctgttg  
gtccaagaacgcttttttaacgcgttattgatgatctcaaacacgaagaaaagtactcattgaagcaagcgttaacgaaaggaacattttgtt  
gctgtttctctacaataggttatctttgaaaagtactcaatttctgctattggaattggtgatgtaaaacacgctctccataaaattatgcttcg  
tttactttcaaaccaagaattttatcaagttttgagtcgcttagaagtggttctgcagagtttatgcatatctttgatcttcggttagatcaaattat  
atccgaggtcatatcaaatgcaataaatggttctttgccaactgccttactacgctcgtctctctttgatattggtaaagcattggcgtgcatcag  
taactcaataaaagtcgagacttcaagacttgacgtgtttatcatatgatgctgcaatggccggctgaatcgtatctatgattttgtccgaa  
aatttcgagtgagggtatatacgaacgatataatgtctcggctcaggatttgaagaattgcaaagtcgtcctgagataattgattataatta  
cccatacaattcgtggatcattgtatgatgctgttatcccctcgaagtaataaccgtagagtttctgacccacctctgctcaacaagg  
tttctcgtactatagctttccactccgagtcctattcatattcctcccccttgatctctccttctgttgcatacaagtaacatttagtgaacgtccaagt  
caatcggagatccgggctttgaaaaattggtagccctgttagtctttctcctcaatctcctcacctcaaaagtcctatacatcccactactttct  
tcaataaacacgtgaattctgctcaaaatgaattcccattatgccgatgtctcctccggtgctcgtttatgttctgatcccactctcctattgaaa  
ataaactaaatccttatctcctccatctctcaaaatcacctgcgtctaggcctgtttacgctcgtgttttattcctcaagtcagggaaga  
ggccacctgttacggctcatggagctcttcttcttttagctcttaggctcagaacagcaatctcctgttcataatcagcttccgaaagaatt  
ctactaatgtaacttagaaagaatcataaattccgcaaagatccagcctaaaggtctatctgaaaacaatccaagaacgggcaaaaaactcct  
acagaagaggcccggtggtctaagaagaatgaataagccatctttggaaaagattttgatggaatcttttctaagtcgtataaagcaaacca  
cttcaccgaatccttggggatcttttaacaagtcactcctcctccggctgagatgatggctgatttgcacactgcctcaatattttgcaaatttag  
cgtttggaagaactcgagcaagaagcgtattctagatcaatgatgaggatcggattggtctgttttagcgtccagtagaaacttctcgtagct  
cgcaagaatcgttacacagatattgtaccctacgacaaaaccggttctgtttggttattgacgacgaagatccgattatattaatgcttcgata  
tatcttccggatttgggcattatagcctgtcaagccccgagccgataccctagtagatttttgggaaatgattggcattatacaggttccgac  
ggagttgtttatgtaacagatttatagggcgggaaatgaaaatgcgcttttactggcctgactccaagcaatcacctatgcagattactt  
caacatcaagtgtggagtatttagagaaaacaacattgatgattttatattagatcgcgtttttcttgcgaaatcagctcaagctaaaata  
atccgacatttttaggttccgacttggactgacggagggtgcccctgcgacaaaagcaggtagtagcttataaggcatatcaatgaagttccg  
aatttggaccagcttttgcattgctctgctggcgttggacgaaccgggacttatattgcacttgatcagctagttaggatgcccaagtcctt  
aactagggcggcagtttggaggattcaagatgtactgtttagttggttgatactttacgacgtcagcgtatgaaaatggttcaaaacttttagt  
caatttgcattttatattccatggcggagacttggcaagccttcaactcgaagatgaaaagagtcataagggtatacctgttaatgactatttgc  
attaccgttataactattttattttattatgcaacttcaactctgttaacgagcaatacagattaatttttttaattacgctcgtttatgaaaacta  
atgacggcatgacttctcgttgttaataaaaagttatgaattttattatgattgcttaccggtataaattgtgattattgcatcatcatc  
atgttattacgacgaaaagcatatctgtaaatagaaaattttatcattattgagaataaaaaagtaatatagaaagataatttttgaattaatt  
gaaaatgaaaaactcatgatattttctgttacatcggttgaactttgaataagatcaatttacctgttctactccagaagcttgggatcctccg  
gaggttcaacaaaaagtaagaatgaattggaataagatagagacaaaacgctgaagaaacgcttttctcgggtaattgcttctgtatctc  
cgtgtcatcgttcccctcaggaactgtcttctcgtcctgaatctttgggcaagatggttttcttgaaccggctgtagaagcaggattttgagg  
ctttcgttaggaaagatagaagaggtcaggagattcgggataaatcaaaacgatgctggtttggttcttattgaacccttgcctacgggtt  
tgaactatggactacttgaataatcgtccagcattctagatctgatttttgaagtgtgtaaaaagaacaatccttataagcatgatgta  
ctcaataagctcccagttatagaaactggtcctgcagaccaatggccagagattttattcggtaaccgcatcgcaaacggaagatccttc  
aaagtctgcaaatcaaaactcctgtttgttattcaaatgttagtcaggatagcaatcgtccatggtcaaaaaactttgtacctctgtcattcg  
taatggaacaggaataggaattttctgggaagctaaagcaattgtataaacggttagaaagaaataattctatatataatttcatagaacca  
cactgccaagatgacattttttgtcatgaatcgacgagtaaatcgttatgtagaagaagctcaacttgatggaaaaggtgatagaatagctggt  
tcataaaagtcgtactattagaaagaaagaatgtaaagctttgtataaaaaagaatataaggagagacagaagtaaaagcaaaaaagcga  
agaaaaaacctggcttttattgcgaaaacaaaggacgaatttaaatggaacgacatgcaggtatagaattttgtcttttcttcttctatg  
atgtctctgcatcaattgtcattttcatcttgcaatgtgtttgtgatccttcaagggtatttgccttatactttctacagattttatagaagct  
agcagtgagtgatgactcgttaagatttttagaaacaatagatactaaaagaagaatgcttgtggaatgaccggacgatttttctgcaaaa  
gaaattttctattaaagatgcgaaaatcctcagagctagtagcaatccactaaaagagctttctattccaataaaaactcattcttcaatt  
tttacttactgttcaaaatttctcgttttgaagactgttttattgtttacatcgtttagccacctccttaatatcaaaaattggaagggcga  
gtggatggagaaaacgaaggagcgaaggaaaaaaagaaaagaaaagcaaaagactttaaattttcttttacttgaagaaaagga  
aatacattcatatccttcaagtgttacttctgcatcaaatcttctgatgcatgattagagaaggcagcttccaccagtaaac

acttttttaggggcaacctttgggaagcagttggaagcattgcgacgaaaaggtaaacataaacattgagtaaaacaagaatgagcgtccctct  
atacaattgttctcgagtgacatactgttgaagaaattgaatctcagcttgccaatcttcatgtatccaaaaagacttatgcatcgaagccgcatt  
cttcgtataaggaattgacaaagttttgtgggaggttaccacgagatcaagattacagaggagaaatcatccaaaagcgcgaagctatgag  
agagctaagcgaatatttacgcagaataagcacaggtatgtaattgttcatggagcagacagaaagaattcaagtagataaatgctaacctta  
gtagatgccgtattagcttctgttggagcttagagctggtattgcttaaagaattcagatatggattgtgctgtgcttacagaatctgtggagga  
aagtgagccacttctcctctattttatgaagaactataaaagaaggtaaagaaattccattcttttagagccttgagcaaatgatgcagaggag  
tctctagagaatgaagttggcatgaaagcaatataactaaataaggctgtaaaggattgaaggaaagttttacaaaagctagaattcccatt  
ataaaattgactggtagcagagaaggaacgatttggttctgggttcagtcgatataggtttcaataatcgtttggcaattcataatacaaaaactgc  
tttcttctattcgcggctggatagtagatttctcccttaattgctgttagtgaatattgggccaacaaaaacggatcaactctccgattttgga  
actcttttaggtatgttaggagaatcattgatttaatttttaattttccttctcaataataactatctagcagttatggttatgctttgatgcta  
ctttactatttacttccagttgtaaaccacgggttttcttaatttcagcaaccacatttaaaacgggagaaaattgtggaaggtatggaatatg  
agtattttctgtctgtactgaccgggttaggtttgatgtgggtttgatgaacatatcgagcgatatctccatctagtaatatcagcagtttaggaag  
ctgttgcaggtttttccgatattatgcttaagttgaaccaagagaacgagtgattacgttcagtagacaagacggggttctaactaaaca  
gaaaagggtggacatcggcggtaagaaaaccttctgtgagaagtagtcaacattcgttttcaacatacctagaccgagcatactggatcagc  
agatcaaattatcaaagatcgatatatattagccatagaagatcctttgagactactcataatgtaagcaatgatgcttattgtatttattctttt  
aactaacatttgcagaggtgggaagaacggtcagcagctccgggttataccgtatacagaggtgagttatgtctgaggcaagactgatgaattcgc  
cgtctcaggttctcacaagaattgtttgagcaagctccttaccacctcgacgatcaaaaaagttgtgacgataccgatgagcctggaaaag  
aagatgaaaaataatgagaattaaaaagtaaaagaatttgacaagcttaatgaatgtgttagggaatctgggtactcaacaaaagcatgattgt  
ctgtttcgttttcaattatgacttactgtctgttgaactttacaactacaatgatggtcctaataatgcttctcattgaggagaacggaaact  
tgactggaaaaaaaatgaaaaggatacaaggatataatgttattaaagatatgaacatacagaaattattgtacactactcaaaatacaaaa  
ggtaggataattgtcttaatagaacaaaaatgggggtcaaaaaacttctcttttataatacagcgtttcttataattcaatgtttactagcttg  
aacaacttaagcgttaacaacaaagcaataacagactgaaaacaaataacactaatcgttatattacgttattttacttagtataataa  
gtattttactaaacagattactgaagcttcaacgtaacgctcactactatgtttgttctaggcatagcttcgctataattaatggccttctacta  
ggcagaatcactcaataactaccatacatacagctgggtgatacccttctgtttcgttggtactggtttataacggtttattatatttgaagac  
atattgaagagtttctcgttcacatatattgttatccaagataaaatgaggatcactaaaagtcctccgaaaaacaaatattccaacctccgct  
tgggtcgttgaattataaaagaaattcaaaatgaagagacatgtccaatcgaaaaagttgcttctttatgttccgattttcgaagagaatgg  
gcttacctcgtggcgatttatactcgtggatccctgtcttaaatcgggtcgtatgcaattttggagaaaatagttgaagactatgaattaaaaata  
aagttcaagctcgtccatttgattccttgatattcacagtttcttgaagtattaaagtttgcacttattactcaaacattgagcgaatcgtctat  
atataattcgaagacatatttgaacagttgttgaatagttcagactggagatcttagatgctacattagctttgtatttgcataattgttcagaagg  
caacaattccagaagagaaaacaactttttctcttcacaggatcgtttgttccgctttcttctcctcaagaagctcgaagtcgga  
cttgccaaaattatgaatcggattattttctcaatgataccctcgtcttgggtcgggattggagtttcatattataaaagttctccttctgaggct  
cagatcgtctaaagcagcttcgctccttcccttcagaaggtttcgagttttgaagctttctccgaagaaatgtctgcaaagtcagcaaa  
cgaactgcttctcaattatctaacgaaaatcaaatcctgagcagatgctcccattactcgtatctctttgcttataaaaatttgccggactt  
aataagcggcgggttgatggctcgtattggactattggcgtttccaactgggtttatgctcattcacaagctgtgcaatcacgcttcatgttagcag  
accctgaaatcacaacacatttagctactctgtttccgtggatacaaaactccacaggaattcaaggcctgggttttgagtgctttaaagcttc  
ttttccgtaaaaaacatggtaccctctgttttagcctcttcaatgtttcagttagttacggtttaatgatgaatctgggtccgctttttcgaataatct  
ttctgatgaaaagttgactacagtcgagctatgttgatagtttctatgattttctcagttatgactactcacctttaggtggaatattggcttgt  
ctgctggttcaatccctcttgggtcatcattatccctgaaaagtcctcgtgactatattagtggtccagatcagttgcatgctcagatcatt  
ttgatggctattctatggctttctgattttcagaatccaagggtttagatcttttagatagctgttgcaattgcaattggaggcgggttggatga  
tgtgaaatcgggcagaggaaatacagaatattttgaaatggattacgctataccatgatgcttacttttacttaaaaatttattgaagtta  
ttttacattgatccaaactgggtgggtctgtttagaacttcgcaatcttattgattctctcttattttctgctgttttcttctgatcacatgagg  
gtttgggtcaaattgtttgcatcggctacaaatataatgtctactttattcataacgaacctacatgttatggaattattcagagaaaaacttt  
cacatgcttctggagcgtgtaatcgacagattctgaattcatctgatgcaatcacttcaattcccttagcttttgggtgcaatctgtttgaattcac  
aaggcttcaatctattttagaaaagaatcctgtttcacttcttagtgatttcttatacaaccactgcaaatctcaacatctagtataatgc  
agcaatcttaggaacctacatagatgagttgatgcgtcatcagcctcttgaagatggatcgttacaatgattttgaaattgtggataaggtt  
tcagatcttctgtacttcaatccttagacttcatgttgcaactgattttcctatttgggtctatttcgagacgtttctagcttctagaaaat  
catttcaacgaaggtcatgcaaggaacctcatgtctaaaggtcttattcctcatattctaaactcatgagattcctgttggcttattgggtcgt  
cgattcttctgatttaatacattttgtcctgttgcacatattgattttgatgcagcggagttttccgtcctctattggattgcatttttcaa

ttgcgaaaatagtaacgtgaacaatctttaaattcaataaatgtaatagcaatggcagctcaatggacaactgttgattacagagttctgaa  
agtttctttcaattactataattggtaacttgatttcgatgtttctgagctgtttcatcatatgccgctttaaaaaaagctggcaacctccgttagt  
ccagctttttataagtccttctcgctatgccggcgtctttgatattttgtgtaataaaaaacatttctacgagtgtagatgtttcctctgttccaa  
gcatctagtgactatgccctttgctgtggttcattagcgtcaattactgctgataagaaggaaaaaagaagcctagaaaaaagaagcgggattt  
aaaggaagatccttcctcaacaagtcaaaaaatctgcacaaatctcactcaaacgacgtacagcattccaagttttcacgctttaactcgg  
gctctgggcaattcaagatccaagatcaatgagtttaagggcatacaagcttgtagtaaatgtgctctgtcgttgatgaattagttggat  
ggcttgcaatcaaatcctaaccctgaaggactgcctgatgagctcaccttacatattgctttgatgtctatactcgatgcatcagcaataattcga  
gaggatgactctaaagttacgcttactcttttgattagtcgaattttgtggctctcagacactccaattgctgctcagctttgtgagcgagtaact  
acctactttgcacttgtaaatgaggatataacttctgaaagaatcgcatcttactagcattgtcttcgactctctaaacttggtgcttacattaaca  
agtgccgattttatgtccgaaacgggagaagcctttgaacttctcttgaaaattcagttagataataatgagcttaacgatttggtatcaagctca  
tgcattactccaagctatgccttctatcaatggttaaaataggcaatccgctgccgattacaggttgccgatatattcgaaggcctagtaac  
caactgttccaattgtttcaatttgaggaaggtattaagtcaacttcagaaaatgcacaaagtaactctgccgaatctcatagccagctcaat  
caagaaaaggccttacaggaaggtccaagctcagtgacactgttaatgcagaaacgcttctaactgttgatccgggaagcaccttctaata  
ggtttagaattcaataactcaaatctaatctgtttaaactgtgtctgttcttcttatgaaggatgattaatcaagcttttgcgacttacta  
tactcaggcgatgaagttcagatgaattctaacctcaacttgatactacaatggctttggtaaaagaatcaaatcttctgctctgttgataaag  
ccgactctgtaattcccagttgggctgccgttggtttcttctgttgagccatgattttcccaaaaacaaagcgaagaattacatactc  
gaagaactggatttcttgaatgccttagagtctatgcctcaatattttattaaggatattaatgctacctgggtgtttcaattctgtttttattgg  
aagtttgttaacgaattcgaagaagccggatgagttcgaattcaatccaccgactgctcactgaagcttattgatggttcaattctataaactat  
gtttccaacagaagatattggtttgttgataaagtaataagcaatataagttcaaatctggcgtggtgacatccgctgatgagactaactgat  
taataactgctagctatgacatggcagctattgttgattccaacggttggaaagcttttttagcgtatgaaggcctgtgctgccgtttgcaac  
gaagcattacacattcctttatcagcatattaagaagactattagagtctgaaagggttattgaacttatcatgttcgatgacttacgcaatatt  
taagctcaaggaagagctgtaaacagagcttctaattttataaggcaaatctgagatggttttgcgttcccctgattgttcacgaagatg  
attaagaaactgtcagctggccatttcgctcaaatgctgatcatcattactggatttgaaggaatcttccggagtcatacggtaaggacc  
agataaattctgatgcttcttaatgctacaaaccagctcaaggtggtttctgctcttggatgaaattatggagacagttgacttccgaaggag  
aatgcaaaagaatgcaagtgctgaattaaaccgaatctgatctatgtacatgcacaaatgattcctttacaatgcctaactgagttattgtct  
ggctacgattctgtaaaaatgtttatggagatcagccgaaacgaaatcgtcttttctcactatctcgaaatacaactctacctgttgg  
cttttctagagaagcttctgcctttggcagcatacagattgcagaggataatgaaattcgtaaagcttttctgttttaactgggaccattccatt  
ttggtttctgtgctacactcgaatgatcaaaaactgatgctgttgacgaaatccgagaaagtttatcgtgtgcttgaagtttacagatct  
agttctgttaattctgaaagtctagagcttattactgtaaatattggctggtgctgaaacttgctataggttaggtgacgctcaactgttcacaa  
aaagcgcacaaacccttattacgaaagtctcaggacatcaataaaaagcgtatgctatctggcttattccggctcaacaagtgctacctcc  
gagattgatatgaattatcctgtttccagaaaagtgattcgccatattttgaggcctctacaattactgactaaggaagctatattcttaagtcaa  
caaacccagagagttgtctgcaaatatgcaggaggctgacactgatgagtcagtaagtgatgagctgaagaatctgagggtgatgaaccacc  
agatctttatcggaattcagtgcttggatcttccaaggtgacattgcaaatgaaacaatgataattatgaaggtagtgaggatgacgacgtata  
tgaggaaatggactttgaagatgaacagtcaggaagtcaggaaggtgtttagtgatgagaacgacgatactatgtacagtgataacaac  
gacatgaattatgaattatgctcgcaggggaccaagcggatctgaacaagaggatactagttcatatgatgatgaatctagtcatgggga  
tatctttctattgatgaagaagacattgataatagcgggtgaacctcgaatgggaagacgaaggaaatgacacgtcagagatgaacatgat  
gaggaattaacgaccaggatgaagaaaatggctctactcttcaagccatggaaaacgctttacagaagcttctgaagacgaaaatgacg  
acgaagccattgatcatgtaagcccagtggaatcgacttcttgataatgaggagggttagttcctctgagcaagatgaagattttcattgggagt  
ggaatgctgatgtcccttctggagcagaatattcagtcgcatggtgctgctgagagattattcccttggccggctgtgctgagttatg  
ataattaatcgggcgataatgctcgttcaaggtcattttgaataatagatcgtcagaagatatactcaagcatccactactctgaaaattattt  
atcaaatcatgaaaaagtagctgaattatgtgaaaattatctgatttggatagccatgtatcttccggagcggcatcccaagactcttttctatc  
tctctatgaatacatctcaagtgattcatctcacttggttggactgctttaaagaatcagatccataatgatcctttacgtgcaactctgattttac  
acctcttttactatgcaaagatggagcggcattgtttctatgttctttggtaacgctgctggttctactgctttacgtgacgggatctgtttatttg  
gtcttatccctcagctttggaaaaccacaacctgaaaaggaagaatctgaaaggcaaaagcaacccagaatgatgagagatcagcggaaa  
ccgttctctgtagagcaaaacgtaaatgatcagaatcaggaatcaaacgaaatggagggtgttacgactgaacaggcgggtcctgccgagga  
gacaactaatgttgatgaaggacaaactattaatctcaggaagagatgtaaatgtatcctcgttggggattgatcctacgttcttactcgcttta  
ccagaggatgctgagaggaatcgttttcaacatatacaagagagacatataagaatcaataagtgattcttctcgtcgttggatccttctttt  
tagaagtgtaacctctgatattcgtgatgaacttcttcaagaagccgtccaatcgcttgttcgataatgctcgaacaacgaaggtgctga

taacgaattagaaatggaaggattggatgaagctgacgaagctgatgatgagcagaaagaacgatcgggcaagccaattaaaaaggtcctgt  
cccgcctttattggatcgctctggtattttgtcaatgataaggctctttatccacagcataatggcaagaatccattttatgacttagtggtcaa  
tgtatctgaaaataacaacaacgagcggagggtttgggactgttattatgttcttcaggaagcttctgtagtactcgttctacggagaaatgt  
tacaaggacttgaccgtcagatcttgaacgttctcagcaaaaggaaataaaaagatcacggtttgcttgattcttatgtaaagtacctgtgat  
taacggaattcatctcgctcttaattttgacgcaaaagcatcgtttgcttctcacctctcaactgggctgatctttcctcattttcctgagta  
tgcaagacttactgggttacgtacaagaagtcaggatcaaagaagtcgaaagagactaatgtttataagctagctcccatcaatgttctctgg  
gtttgtaggctggaagaaatattcggcaatacactcgttatgaatacattttcagagtgttatcaacacttaccagacctttgttgcattttata  
aacaccagaagcctgaagcggatgttaaagtatctgctggaacgaggatgattcagaaaactgatgtgagtgctccgaaggctgaaggatc  
atcggcgctggtgagaagaaaggtaaaaaatcgcttaatcctcctcaaatcagatgaaaaactaagattggctgcttcgtaattaccactg  
attctgttcaagtcgacttttcaaatgcttctgtaattgttctttgttctcagctccatgcaagaacattattggtaaagagctattaa  
gacatgctcaagaatattggaatgcaattataggagattttgacgactttgaggagatcaagcgtgtagaatgaaaacgaacttcaaaa  
tgctttggctcctttctgctggcaagcttaaccaggctaagttgttgcgttctgaaagcttttagattacatcttgagcgtcgtcctaagagggga  
agaacagagcccgcagaatattgttcagctactcgaatttatgataattacaattcgtggcgttgggagtgattaaagcattgcttgggttcta  
tgaggagcaatcagatcacgcatgtttccacagtttctcactaattgaatctttaaagttattgtcgccccgtttatcttgacttgcctga  
ggaagttgcaagcaaatccactatgctagaacgtttgaagacattatcatcacgtttactgaagaacatcgcaaaattataaacatgatggt  
tttcagactccatcgcttatgagtggtcattttctactagctcaagaatccgaaggtgcttgaatttgagaataagagaaattactttagccgtc  
aactcatgctgaagctgcaaaaggagcagatcctccttgaatatcaatgttagacgtgatcaagttttggattcctaccgtgcgttgcatttc  
aaggacgccgatgaagttaaatacagcaaaacttaatatccatttcagggaagaagaaggttagatgctggcggcgttaactcgtgaatggttac  
aggattggctagacagatgtttaaaccggattatgcttgttttaccagttgaggagacgccaccacattccatcctaaccaggacttctcgtt  
aatccagatcatttatcgttttcaagttactggcagaattatcggaatccgtctacgatggttagactattggattgtcacttcagctcgtcgtt  
tataaacatatgcttcacgatcagctcggtaaggatattgaatcacttgatcctgactattgcaagccttgggtggtgattgaataatgatatt  
actgatattactgaagaattgtggttgaaaaagacgttttgggtgaaaaacgattgttgatctaattccaatggaagaaacattccagtta  
cggagctcaacaagcatgattacgttaataggatggttactataagttgggtgagagtgaaagatcaattacagagcttttagaaggattct  
ctgatatcattcctcccaactgatccaaatttcaacgagcaagagttagaattataatttcagggtcttccgaaattgatattgatgactggcgt  
aacaactgaatatcacggttatacgtttcatcccctcaaatcaatggttctggcagctgttcgatcctttgacgaagaggagcagcgaag  
cttcttcaatttgaacaggtacctcgaagttccttgaatggattcaagaattggaaggcatgtctggctccagagatttaatatccataaaa  
gttacgggtccttgaatcgtttacctcaatctcacaatgttttaaccagctcgattaccgagatgaaacctatgagcagctgaggactatgtt  
ctcacagcctaataagagcctgaaggtttggattgcttaagatgcttattttattatgttatattgttattgttattgattcgtttctagattc  
tgctctatgataagaaaaagaaaaaggccttaaaagctactacttaacatgatggatgttacaatacattagaaaaattcatgagtcataa  
aaagtgaattatagaaactaaatgttttatactgaatattacaatattttgagtataatacagcattgtgaatctgaaatgaaatgggtgag  
gaatggtgttggcctgtatacatattttattaccaatagacctcaagctacaataataaatgtttatagacggtatgcaattattataaa  
ttttatgatctgtagtactatataccagtataatcccccaataataacactttttctgaacaagcagaatgaatcggcaaggatgccaaaa  
acgaagccaaattagagtaaatcataatcatccagctatttaaggtagtaaatagttcaagaacaaaaataatggtacataccttatcattat  
acttggcaacggttctttaaacttggaggtatcgggtccatgtaacaagcttctaaatttcttgaacaagataggcaggatcagtaataacatg  
aggaccgacacgaacgtgacctgctcagcagactttgtagcagcagagattgttggacattctcagtttgcacataataacaggtgaagcagc  
gacgacatatagcagaacgttggctcattctcgatatcagacatcttggatttgaaggtagaatccccatgtcaaaagccttccagaagta  
gatttctgactttaagcgaagaggatccgtaggacttagcaaggaatacagatgagccaattggcgaattaccacaacaaatgttatatttt  
gatattcctcgtttgggaatgatagcggcgcgatgacctcaaatcacgatgattatcatcttgcttatagttgagaaagcaactttctc  
agcagtttctgctcatcaaaaaggaattagatttaaatatgtaaattttctacatacagatgtttaaagaattctcattttcctcagttgagattg  
aataaaattgtgtgagttggttctcagtaggatgtagggcacttgccatataggcgacaattgtcatcgtgccttgatcctaaatttcacaggt  
aaggacgtgaactaaagcgaatcttctttaaagaaacaatattcagttcttgaatgggcaaacgtcgtttccaacatcgattttttaa  
aacagctaaaggcttctgcaagctcaacaacaccttccatgattgatttctacgtaaatagcagccttttttattgtttcctaaagggtca  
gtaaatagcctgatagagtcagagtaggggtatacctgaataattcaagagttctatatcgaatgttctgagacttttctgactgtagctgc  
aattcaattaaataattgatcgcaattttacagtaattgaacatagacattctgccggtttagtttactttgacaactcgtctaggttaac  
cagtgctgtaagggtgaacacgccttgaagatgtacgaaagagacacaaaaatcgagtgcttgggtagagcaaaaaatgagatgtgaaa  
agaaaaacaaacttaattatgtggatggacacgcaaaaccagtttgcatttcccgactgtaaagtaaaccttgggtgtttggaggatgctttg  
aacacactttttagccagcaagttctgctctaaaactacaaaaggcgtttgacgtccagcttctgtggttttgcgtatggacgaagaagattg  
gaatttggcagtggttagctcttaatttccgtaaggattccatcgtcatttcgaaaccgatgacaattcttcaattcccaaaaggtagctttga



gcccaaaacttgagaagcttctacgcattccaacatgggtcaagcggttgcttttgcgaagctttaattcgcaatagtggggagggggtttcga  
gtgttgagacgggatcagaagaatcatgctctcctccagttccttctggttgatccggaaggattcttctctgggtaagtgttcagactgc  
tccacatgactatctactttccatccaaatcggaatctggcgttacacctggctttgctcccagacgcaatcgactccccgcaagaattaatc  
gagtacgtcctatatggatatttacaatggaacagtagtctcatctgggatcacaggctgggtgtctctgcccctgatgacggatcgagaacacgc  
atcccatatagtggtaatgtagaatgacctgaattatagcccaatagcacattctgtcttattttcataagggttttccgaggattctccttc  
ttccatgaaaattgtaccactatcaggttccatccgcagttcaattcccactggcttttgggtacaacgggtgcacacatgattttggtgatgagac  
ccctccaggtaaacagctctgcttttgattaatattgttttccaaaatctttggctgtggaatgggatgacgctgctttcggcggatggt  
atgttcaggataccactatttagatcgctgtaaggcaatggaggataataacttgagttggcgttctctagatgaaagggtgatcttccga  
aaggctatagctagcaatctcatggggctctgacacagacggcgtgctggaaggacgtacctgtaaaaaagcaaatctgtaatgattgaaacg  
aacgtagagagaaataattgactcaaaagcttagaaaagaaacaaaatgctttcaatggcagatttagcaaacatataattatggaacgag  
aaacaagaaaagccgctttccagaaaagaaaaataaaaaaaacaaaattatctataaagagagaaagatcaaaaaaatctacaaaaga  
tggaatcctaacgaggttcttttctgttttttgggtgtttatgtcaaggtggaagaagagccgaatacggatgtggttagcttcttattgt  
gtttaagcaaaactggaatggttgtaagtactataacgactacacgtttattgctgtgtaattaatagaaacaatgctttgcttcttattc  
ttgcttcaacaccagagctgtttgcataaattacgataatgagtttaaattgcccgttgataaacaatgatagaaaacaaacgaaagaag  
agtgaaggatcatttctgatcagggaggagaagattcacgttatgttactcgaagaagcagtcgatgaaaagaaaatttctacaagagccc  
aattggaaccatactcattcaaggagggaagccgaaaaacaagagaccaactttttcttttcttttctatttcttcttctgtttctgtttg  
ttttctgtccttttcttttcttctgttgtttcacctctactgatggttcgatgctccaagtcatttttatctctggtcgatacttccacgct  
gcaacgctgatagactgaagcaagattggaatcgctcatgatgggattgtaacagctgagtaattccgctgaaaacgatataaataccg  
gtgatgtagcacttagatgctgcttacacactttctgttagaggtaaaaagattgacaataatcaaatctttttctaaaagctctttgg  
aattctttgtctgttcttagattcctttttttgtctgttattcttttcttcttcttcttcttcttcttcttcttcttcttcttcttctt  
tcttttcttcttcttcttcttcttcttcttcttcttcttcttcttcttcttcttcttcttcttcttcttcttcttcttcttcttcttct  
tgagcccaaaggccctctgtgaaaacaagcactgttctgttcccaagggcaaggctacccttgaagaaatcagccaggttcatgatgtgggtg  
ctgtcaagttccctgttactatgagaaatcaattgtaattacgtgggtgacgctgatgaaaatgcttttggatgtttattctcaaatgctacta  
ttcccgttggttaacaatccaactcttctgaagcagccaaatccgacgaggtgctactgctatgatgaatgctcctgctctcggaaattatct  
cctaaaaactgggctctgatggtacaagaaggtgctatcgactttgctcctaagggtcaaaagatgtttactaccaaatgagcggcagcgtatgc  
caatgaagttgcttacaagctagcctatcgcttcaacaattgcccagagctaatggtacctacaccgacgaagaaaatgctagttgat  
gaacaattctgctcctggaagctccgagactgctgtcctttcttccgacttcttccatggtcgtcttttggctcctttcgactactcgtccaac  
ctatccataagctcggatgctcgttcaactggcctcaagctgactttctgacttgaataaccctctcgaaaaacatacagctgaaaacgagg  
ctgaagaaaatcgttgatcagacaagctcgagcaaatctaagctctcatcattgccctatcgccgctgtatcgttgagcctattcaatccaagg  
tggtgacaacatgcttcaatgaattcttccataagcttcaagccactttaaacaagcacaatgttcttctcatcgttgacgaggttcaactggt  
atgggctgctactggtgctatgtgggtctatgagcattggaactgctactcctccgataggttacgttttcaaaaaattccaagcagccggtg  
tttattacatgacgagaaacttccccatgcttatacaacttcaatacctggatgggggatccttctgtgctatccaggccaatacattgtc  
aaagaaatccgtgacaaggatctgcttaataatgtcaagttgtaggtgacttttatacacttctctgaaaagttggctgaaaaacaccaggga  
aaaataaacaacctccgtgtaagggcaaggcacattatcgatgggactgtgaatcacctgctgcccgtgatacatttggctcgtatgaag  
atgaatggtattaacgtaggaggatgtggtgtgacgcatccgtcttctctatgctgttttcaacaacatcatgctgaaattcttcaaaaca  
gattaatgaattaatttaaggctcatctttatcttttcttcttcttcttcttcttcttcttcttcttcttcttcttcttcttcttcttct  
tcccaaaaatacacgcatacgaatggtttctattgttctcttttcttcttcttcttcttcttcttcttcttcttcttcttcttcttcttct  
aatgaattatttaatttctgctgctgaatccatcttaaacatgctgttcagagtcagacaatcaataaaaatgtaaaacggttaacaatca  
ttacgaaaatggcaagtaagtgtatgattgtcttcatattgacagatgaaaagcgttagccattacttggtttattgaagcatacaaggaat  
aaaatccgaattaaggcaggtgaaaaaatcgcttcataaagcaccaaattaaaaaacgattaaaaaacagcatatttctagaagggaa  
aaaaaatccgaatgttctgctagccattgacaaaattaaatccttcttcttcttcttcttcttcttcttcttcttcttcttcttcttctt  
tcccgcgcttataaaaggaaaaagaatgatcacgaacagtaatcaacatacaagaggaattgagccattgctgttcaattgactttaagt  
aagagtttgaagcgaagatccgggatagtaggtacatcatattccaaggcttcttcttcttcttcttcttcttcttcttcttcttcttctt  
tcccttatgagcctcaacagctcgagagcaggttcagttcgagcttcagactcatcagactcccatatactttcttcttcttcttcttcttct  
ctttactttcaattcttcttcttcttcttcttcttcttcttcttcttcttcttcttcttcttcttcttcttcttcttcttcttcttcttct  
ggtgcttgattcgattcaggggtctcaggaatccctctctatctcaaaactcccttgtttgtttatcataattgttgaggagctcagagattcta  
tcctaatggagaagaagtaggttcgagtcacaggagtagattcgaaaatgagctatgcaaggcatcttgactagaatttaactaacaagc  
tcaataatctcgtcccaagttccacctccaaaaggcttatgtgatggcccgggatgcttcaaaacttttctttccaaaggcatgaaatgcaatga

gtggcgataggtgctatataacttaagaaagttggcaaagcacagctaggtgcttcaacaacgaatttctgctcaattcttactttggacttt  
atcctccttcagaatggcagtttggtaaatggtaaaatcgctctggtgctactgaagtctactgtcatattctatataagcatagaactccga  
acttctttgtttatctcgaaaatgtagttatcttcgagttgttttttttttcttaattattatgtgtgttcttacattacaatgaacaaaatgggttc  
aactgaataaaccacgtaagatttcatctatagaaaagtaactctgaaataataatagaccaaaatcaaaaactgaatatgaaaggaac  
gaaataaacttcaaaaataaaaactccaataatgtacagtgactgtgagtagaaaaacgctggtttaattaatgatttcaagaagcaggcaga  
agtagtttgttcttcaaacctccagatatgaagaaagagacattcgaaacgtatctggaagccagctccattgcatacgcacatagcactttcagg  
tttcgatgataagtcaagtctggaagaagtttaggagtaacaaaaagatttgggaagaaggggttccgatgttgagttacaatgtgagaatg  
aacgacgcgctcatttcgaggatccataacctgattaatttcatccacgatacgaatgggtgcaactcgcgacacctgaagagctaatagatacat  
tatggtgaaacagatcgctcctcctgactggcgctccagtaagctttgtaatccttctgcttctctaaactgaaccataaatatcgatgagcc  
atgtgcatagcttcagcttttccaaacgtacttctcctgcataacctatgctggacatgctctgtgagaatctctcagttatgcaactgataactt  
ttctagcttgattaaccaagctttttgatcttctatctttttctgtatcacaagaacggactcgtcagctactcattttcatttctgattcctctatt  
tcattcttcgacgatcatattgttccataacaaagttattaacattcatgaagcccaactcgtttctcaacgctgattttgtttcgaactcagaaa  
ctgtcgaatctcgttacttctgtaatggccgctgtcgttcaggatcttcatgttgcaagcgttcaacaacggaattgataatttccattgct  
ctttcgtgctgactatttttctgaagcttctgagttgtcatgtagttcacgaagatggttatttactgttccgcatctaactcgtgttttgta  
atcgatagttggctcaatcacattcaattgtgaccgaggcttttcaaactcaatagttgctttcgtgttctggctttcattttttgatagaattc  
aaaagagccatacagtttcttacgcatgcttatttttcaactcttttctaaatgacttggaaatttttccgctgctctaaagcaatcgtg  
atgattggctctatcattcaggtcttgcattctcgtaggggagtaatttctcatctcttcttctgctaaatctcaatctttcatttctcagaga  
tcagcgcgctcattcgtacttaccctgtaggttcttctcattgctttgcaactctcaagtttagacgtctgtaaacttagctgctcttctttcc  
tttactaatgatggctcaacatttcagaaaagtagacgctattcgaaggaagcggatccgtcctttgggtaattctctattaccataagcggaa  
gaaacaccaggtgtacagaagaccagcaaggtatgttttaataactgggtcaccattgggcaaacgatgttatttaatgcaattacagaactt  
ggagataattcttttctgcaacaggaattgatggatttccagcatatggcataaggtaccaagacaactccggtcctccaataatcttaata  
aataatccatcaaatccaatgatttaagcttttctcgggaacatagcactgaaatcatcaagttcttacatcgttcaacttgaatctcgtaca  
gtaggagtgactcgtcttagaagtaatcagatccatcaactcaaatagtcagaataatttgacataacgaaagttcgaatgtatcagcccgg  
aaaaatcctcaatgaaggagcaacgttcttttttgcattctagatgcatatataaggccatagctgcttctcaagatttgattcattctct  
ttaatagttgatgtatgataagcatctccaaccaggcgtcgttctatataactcaatttctcctcagtaagatcattatagcattaagctcgc  
gacgaagattatcgatgcaagtagttttgtgctttaaaggtagtatattaccaagcgcagtgcaactcttaatttctgctttcgtaacgaagt  
ttctctgattaagttcctgcatcttctgatggacaagctcaaaatgttctgaaggttccggaccatcattccaacaatccatcaagtcctgc  
tgtgcttctggactgctgactgggtgcttttagaagcacacgattcgaatgttttctgtagattcgttttcttttccatgaagttcagacacaga  
tgattttcttctccacttctgctttaaactccagccaaagaagaagataactgatcaaaagcctctttttatcttgaagtcgattgaagttgctct  
ttcatgctcaaatcggacggaactctcaatagcatgctttaaattttcttaatgtccacctattctccttagctggttatatattgttctctct  
cggtatattataaggcttctgctatagctagtgactgagatatgactgaatatttccagcttcttaaaaaattcaactcttttcaagagcctgtt  
gccgttcttgatcgagctaaagttctgaccctgatctttgtattgcaaagatcttttctctttcgttaattcaatcagttttcgtgttcaagc  
aataagcctcgtggcaatagctctttctgtttcaataagcttagtgaacggatctagttgtgcaaatctgcaactctatcttgcggcagaaaatg  
gcaagattattcaatgaatgttgaacttttccatcaaatgagagattgctgaagatgaacaagcttcttattatagagaatgaacttgattgt  
cttgattgatttgacgggtataaactgttttgcaccttaagtttcagttccaattcgattgtagcgcagtttttccatacttgatgactctctag  
cttcttagcccttcaagtaactaagtaaccgtaataagtcacagcatgccaatagagcataccttggagaccagccaagcccaaaaact  
ggccgatacaacagctacttccagtgccattagggccaataatcatatttaagtaggacctggataaaactcacagctactcatatgtgacaaa  
attgatcaacttaccgcacgatgctccgatgcatatctatgaaaaagtcagcaaaaacgcctatacaataaaaaattatataacgttttctg  
tatgtgaatgaacaacttacgtgaaataattggattatttctcctcgtttttcaggcctatggccctcatcgtacaataaactccagttgacttta  
ataaatgttattagcaagttctgaacctcaagaaaatgtctgaagattcgaactttaaaggagaaacaagttctgcaaaaacaggtttg  
gatgaatatacgaatagctatgaataggatgctgaagtggtattacaaggctgtagcgtgacacgtagcttcaaaaattgttgacg  
aaatggtttataatccaacaacaatattctgattctttaaagagaattggaaaaggagattggttagtacatacattgtttaaagcaggtgtt  
ggcaatactggcggacctggaacacaagacacaaagacataaggatggttaaccgcttggaaaactaaaattttgacttcttatgttggt  
tgattaaagctgcagacgattacattgccaggaaacacctgaaatgggaaacgctggtactcgtgtgaacaccttatggatcccgcacagag  
gaatcgtctaagttagggtttataaaggatgaccttctgctgatttgcactacgggcaggtttcaaaaaggttctgctgcatgcaattccc  
tcttctggctttacataggagcttgaactgcgagttcccttaaaatcatcaaaaagacctattgaaatacaggttaagctgctgatggacgata  
aacttgagaaaagtagtatacaggaaccaaagttccgatttctcaaatcaaaatcaacattggttctatcaacatttcatatgtttcataagt  
gtaatttgcaattgaattcgtaaacttctactgctactgctacttctttatatttttctttttttaaataacaaagcgtatg

ccaattgtacccccgttgtaaataagctgttacttgtgtagattgatgatggacgcgctacattacttaaaaaaccaagcgtgtcaattgt  
tagaaaatggaatTTTTgtcgcgtgctatattaagtcggtcagaatccacgcaaactcctctgtaaatgagtcgaatcgatgaaagcacgcttgac  
atcagcaaaactgaagacggggcttggccgactgtttgttttctcgtcaacatctcccaaacaggtagataatcatttcgtaagtatttttct  
aattcctgtatagctataagataagaaagtacgaagacgtgactgttaggacgtggaaacaccaatacgtatcaactaattcaatcgacggcaa  
gttatagacacttttagagtctattcagtgctttagatgatgatatggatccattgggttactgtgaagacttaagctcaatggtacattttgaaac  
actgtctcattggtaaaggaaatgtagtattattatctgacggtagacatttttagatgttcgtcattgcttcttttatatcagcagaaaaataa  
cagatgatgactatcatcatgagatgatggatgaatttagtattaccatcgtctacttggtagtggagggttttcgctatttaccatggcgatt  
gaaaaaaaacaggaagacaatatgcttgaagatcattgataagaaaaagggtcttctactcgttttatgacgatcatgaagttccattctg  
aaaaactaatcatcccaatatcgttcatgtagctatggactacaactctgaaaaaccaattgtatgacaatattcctattcttaattgctaacttc  
tttagctttatcttgaagaattggttacaggcggcgattgttttagttatctgaccaagatgggaacagttcctgaagtacatgcttattatg  
taccagatgctacaagcattaggtattctacattctcaaaacattgctcagactgaaattagaaacataataattgtttcttcaaacgaca  
gctgttccgaatcattttgactgactcgggttgcagatgtatggaaaaggggaaaagaatgtcgacatttggggcaccttggaaatacacgg  
cccagaaataagagactgaaaggctcgacgaggcgttgcaagaaatgaatatggggatggcaaagaggtagatatggagcctagga  
atcatcatgtattgcttcttcaggaaattctctacgtttctcggatgggactatagatttgaagacgaggtctggaaaactatttctagacaa  
gctaaagatttaattcttcttctgcaaaaactcccaattcaacgtccaacagtcagggaagcagaagaacaccttggtttttagacacaaat  
ctcggttgaaaaattgtataaaactgaattcttaacaatatccattatgaatcatttaaacacatttactcaactagaaacttgaagaa  
aagaagggtattcatgcttaacgtttcaaaacttgggtataattattacgtacttcaaaactcgttaagctatgcttatgaaacgaacttgaataa  
aatggggttatgaacattgaagagtcagtcattgacgtacatcttttagcttgggttttcttgaacattcctcatgcaacaaaataaaaaatc  
cgttaagattgaaaaaaataaactctccctccgggattcgaaccgggctgccagcgtgacaggctggtgtactaccctataactaaggaagatgt  
cttataaagcggattgagtatgctattatctcagagagttgaagtataaatttaacaagtagcaatttaactctagaaatggtaaagg  
ttctgctgctacaaggtacctgaaaaaatgagacaggactcttaccagagaggtatcaaatccgtttggattcagcttcttgaattttgat  
cggctggatattttaagcgttttgggttcttttcttttaattacttattatgtaaactctcatatattatcataccattctaataacgtc  
tacgacactatagacacaagtcacataaaaaatcggcgaaaatgaataaagttcaaaaacaaatggtttctatatctaattacaacacca  
aagacttttttttgcgtttttagataaattatctatcttttactactgtattgctactcgttccgtatagcttaaacctagtttcatagacg  
gatattactgtccacagtcgagtttttctgtcgttgcacaagagctccaatttttagtttctttaaattcaattggcattttgagca  
attggtgaaaatagagctttatagaaaaaaaacggatcccatttctgtcggagaacgactttatagtttaattcgaagtagcattgttttag  
gtttttcaggaattgaaatgtcaatgcaaatagttcgtgaagaccagtcgaattcgcactattctccagcctttgctaaccggttagggctcct  
actcccgtgagaacgtcgaatagaaagcatcgacgctcaaaatgtgtattgttttacctgatactggttacgatgttactcaagctcgcgatt  
cttggcattattttgaaacaaggatacatggtgcaatttgcaacttgacaggaaatgttgcctcaggccgatcagagacttttaggtggtttaag  
tcttggtttttggagccactgctgaaactgtaggctttacgaaagaatgtctaccactactgaattttgaaaccttagctgtcctctgaatctt  
tcaattcaatacctatgacttagttcttattccagggtggccaggatccggcagttttggaattgttcaatgttctcgttcttcttactatccgat  
tacattccttctgtcctcgtgcaagtggtaaccacgtttgggaaccattgcccaaggcgtattgccgtcattgtgccgtcctcaaatctcaaat  
taaatcgaaactactcctttataggaagaacatcttattgttgggctttcaatccatctgcttatgcttctacactatcccagcagacaa  
gtacaaagctggcggactgcttctcattggatttattccgatacaaaagtagcttttagcttccggctgttattcgggtgatgttctcgttggtaa  
gccctcgaacctgtcagtagtcacttattgataggtataatgcttcttcttggatttactttaaagcaccgtttatcaattatattgttct  
gtacgatttggtaattagaatattccttctcatttactacatattttccctcattctggttattctgttttctcgttattttggtcgtatttcat  
tattttatcttagattgcttatgtacactactaattcctctatggcttcttctcacaattgaatttactagtagtcatatagaacagctctg  
attagttaaaattatacgcattgttttcttctatagaaaggttaactaataaaaaacttttattttctaatgcaatcttcttttggtagagct  
tggcaataccaaccaatttttaactatattataaagagaaataccattctgctcatttaaaatatttaataatcattgtctggttaaaccacca  
atcattccaagtcggttgggttattttcatcacaacccgaacactccatctggtcaattacctttacgcttctggttccaaactcttct  
gagtaattgcttctcctcaagtaattaaggtctttatcgttttaagattagaaacaaaacattccgtacggagttctccagatgtaaacga  
ggatttagattcatctgaagagattctttttgtatttctgaaacgagtaacacagtcgttgacgcaaattctacaagctgttctgtgctgtaa  
aaagataaataatgacataaataagtaatgagcggaggtaccaatacgtagcaataatatacccaaaaactcccattaagagattttccatg  
atthaagaacgtctttaaattcggcagatattaagagatattcaccataatcatgccagatggttacatgcttccggtagtagagtaa  
atcaactggagctcttcatgaaagcatatttaacaagtttaagatgacggaagaagatataaattatcgaacgagcaattgacttcttttag  
aatgcaaggtagcggcaatgctgggtttatgatatttgcgagataattcgtcaagctaaaaaagtgagaatagatagaaaaatgccttcatga  
attctagttcaagttagtagtacattgcacaatatatgccgtccttacttcttatttttgggttttagccttccaaagcttgggttagat  
aaactttaaactcatccttgcgatttcaaatcatttcccttgaactttcatagaattcatcaataactgaagaatgaaatgactctcggat

aattcttgctgtacaggaacctgagattctaaccatcttgctataaccattctcaacctgttaacacaagccttaacctgttctctagacgatc  
tgtaacagaactagcgggtgacacaactagataggcttgaatccgaaatttgacaaaaacggatatgctggtcttctactgtcgcaaaaca  
aacgtctattactggcgcatttcgcagaagatgggcatggtatacacttggccttttagtcttttcttcaaataactgtacacagactttaaggtt  
gatcgaacaggctctggttgagagaagaaatgtaactagggttaagcctctctataattgttaaactgtatTTTTTaaatgaagatttgggtg  
gacaacttaccaggaatttcacaaaatccaactcgtttaacttctgctgcccagaatgcaagtacatagcaatgaacaacacaaacaagaaca  
gtccatatactcgaactttccatctgttataatacttacgagaatcgttttttaagattcttctgttccaaaaagcgagttttagtagatg  
aaagactgacgtcgttgagaagatatttgttctgtcagaccgtacgccttctgcaaaaataaactttcggcaaatcttctgttggagaataggt  
ccttgaggctgatctatagcagaaaagaagcttaaagggttcttctgtctagcctttagtaggggctgcttctgataaaactctttaagt  
gactaacaacattgacgaggaatgagactggagaggatgaaatttatcattgtcttggataccaaagtcttctttagatgctggtgaaaatt  
cgggttactatcagaaggatatttagatttttagtaggtgtatgataatgacagattgcaaatgatttccactaaaggagtgctgatgag  
aaggaaacaggttcgcaaaattctaaatttgacggcactttaatggagatgataaataactgtattggaggagcttgaacgtccggcgatg  
acttttagatttttagacaaaacgaatggcgatgtttagggctcaacccatgaaacttcgaggatctcaaggaaaagtggggctcattgaatta  
gtagactctggaatacaggtgatgacttatgttgaacccgaattggctgaaaagcttgcgaggaagatggcgacctggaatgaacgggga  
tttcaacagtcgggatggacgttctacccaagatgctttctttagacctagttttcatcttcaaatctcagcataagaattgttagccggct  
ggacggaatgggcttaatgacttccgggaaatcgctcacagcaggtgtatccataattctcccacttattatggttggagatgtttagtagtt  
tctataagcaaggaaaccaggagattcttctgtgcttttctgtctcaaatctcgattatttctctctcatcagaggactcactcaattgtgta  
aatgggagaaaccgtcttctgaattacatttctctcgcagagctttagtaatgctggttggagatttagctgctgagagggtttagttttag  
gctctattgcagtcattccaataatttccgcccagactacgattcgggaagagcatttcttttgaattcatcaattgaaagagaaccattctg  
gcctgtcgtagtttgcgaacaactcaactaagtgtgcttcttagcagtgagatgaaagtatatctggtgttggtttaaaatttcacgcaaatcaat  
tacacgaagagaatcgcacatcatatagaggatcgaatacgggtgatgctcctcatcactttttggaaaatatcaatggttgattatgtagct  
acgattcagctgaatgtaacatatagtcagaatcaaaaacacttctgttgggggagtggggggatcagaaaaactcaagggttagataaa  
cgaaacgacaaattcattatgtccgctataacccaatattttataagaagataacttaagtattttagattatacaaaacttcaaaacgtagcct  
tctagtaagcgaatacagaatcattgtcaggtttaccatccaagtatacaatcgtcagggaaatcttgaatgagaagaaaaagacagacactc  
gataaatattagtttttctttaaagatacatgcaaatgttcttgaatcttcaacggcaaatctacgttcttataagaagctggtgaaatcg  
actgtgaaagaaggttccatgtcatattcttcttctgaggatgaaggaagcacaactaggattcaaacagggttatatcggcagacaaca  
ggaattgttcttgaagggaagttagtgaggcgaaggtgagatggatgccctcgcacagcttgaattttacaatctctcccgcaggacac  
atcttattgcttaaacattccttctcctgaagatgcagcgggagtagggtagcgaatacaatctgcgcgagcacatttgcggcaaatgg  
caaagaggtatttctcgtcgtgttaagaagcgtttagcagggcgtacgataggtttgttactaaaggaaggtccataggtgaaatcgc  
tgcttggaaacagcagaacttttaattttgaccaacacgttctgtttaggaggattcctttaccacttcttcttctgtcagcagtcgccc  
gcactggttccggcaatcttctgtagaggttctgctaaagtggctgctcattctgaccagaaacctgttcttattgttgttgccttctg  
aggactcaaacctcgttaattcgtcaaacagccactgagaaaaatcgaatcaaatcgggtcctatcaagtcacaagcttctcggtaacctgtg  
atgatctttcattacttatcattacgaaaatgaaatccgtaagagaggctgcttcttggcccagccgtaatcggccagtttggattccacaag  
ctgatgaatcttgcattgttctcaggattttccaatagaggccatataaataccttattctctgacgatgaaaagggaggatagtagattgc  
gttttttctaagttataaccagttcagaacgaagagagaatgtgctcaattaaacagtttatcttctctgacaaacctagagagctatttgg  
tcccacaaaagcagcttttagtcgacaatgactgatagccaaaactgatgctaaatctcggaaaaagaaccaattcgatccaaaatat  
ccaatataaatttaaaaaataaaaaaaagcaatcttccgtacaaaatgccaattttatagttcacttggtttcttcttcaatatactctg  
tttagttcttcttcttccactacctcctaaaagtgttacgaaacccaacaaattctacaaatatgaaccaatatacatagtagtaatat  
aattttatgaagggtataaataatattgttttaataatcctcaactctgataaaacaaaacagttgaacagtaactatccgatctcgtgtg  
ttaacgtaactcaagtaacggcagagaagtgacaactcagagttattcaagtagcgtattccgaaccagtaagcaacaagcagcgcatttgg  
ttcaattacataattgctggaatccatggtttatttgcataagaaagtaagtttctgttagcaatacttcttacttttttggagcgttccggac  
ggttggtagcctataagcctaacttgccttgatataatacataggcgacaaatctatcttgttgaagaaggctttaggatcatctataagaag  
gaatttctgggatagatttattatcagatttggaaaagtatctccgtcttacgcttttggattcccgtgttcatatagaattcacttataacc  
tttctgttgggattcaacctgtttttgacattgttacttagaggagcgttcatcatagtcattttttagatttttagcaataattttagaac  
gaccaagacagaaaatagaagactatgagttcccagatgacgaagatacccttattgatttccgacctctgtaaatagagcctatcgttc  
gcgaactccatctcgaagagaatactgttcttctgtccttctttacaaaatctacggacaatgataacggctccttcaacactaggtat  
atacactagtagcgaagcaaatatagatcaaacctcaagttcttctcgcataagagttataacgctaccgacaacacaaatgaacctatc  
tcgttaatgatcccgaagacaaagtcgagtaattaatgatgaaagctgcggtagaacagactgctgcatggataatagcctagaagacgac  
tgattcgcggtattagtagttaccttgaactttatcaatgcgtttagcgggatgattgaaattccttcttcttctcgtcaagggttgc

gccaacattatgggctaatacatctgaattagctccaggtgatccaatgtgtcgtcttctgaaatcacccgctgggtttcaaaatcgtgccg  
cctttggctctgtggctgatttcttgggctgtgtccacagcctattatggacttttaggtgatatttatggtaggagactgtattaatgatagctgt  
atcatttgttctgcttgggtgattatgtcttctatcaatcatatagtcaagtaaatttctttcatcctaatttctgcatcttgaaaggactaggag  
gatatactctacaactgtctggacaaaattcatttgttctgattgcactcggaatgaacaccgagcttggatctggccttgaatcttctactt  
accacgttggaaactgcccttggcccactgttagtggctacatttgcagattcctctaaaatgtattatgtattattataacagcagatttggga  
cattctataactttacgttggctattttaccagaaagtctgaaccgaatcgataacaaaactcatgactcttcttctttaaactcaacgatag  
gtacttgttggaaaccactgaaggactgtggcctcaagttgtttgtacggaaggaagctgtccattcgtcaatacagatgtaattgagactcat  
gctggaagaaggcattgggatgttatgttagcttcatattaatcttttagcactgtattggagcaggagctatggcttactgctatctatacaga  
cttcagatttgggtggggctcaatgaaggcaagtctaacttctgttacagattcgtttagctagcgtttcacgctgggtactatcttcccttagttcc  
aaagtaatagaaagagtttggaaacgcttactcttcaaagggtatttaattatctaagtagacgtaccgataacccttctacgctacaaggt  
attcggaaatgttctcttatttactcttccagggtataccaatgagaatgtccttcgagctgacacattggacgaaaaatacactatcgtcaaac  
gtgatgttggaaatccagatttagttatattgtcgaatttgcctctgtattacttctgttgcgcaaaacagatgttcttcttgggtatcgtt  
gttcaagcatttcaaataatggttaattccttgtgttcaatctatcgtctaaacggagtttctgaatataatggacgtatattggctgctttgcc  
gttttgaagctgtgctctaataataagaggccccatgtatgcttacaatagcggcttctgctgatacctcattccctaacttatttttacgtga  
gtgccgttctatacattatctgcttgggtgtaacttattttatgagactctacaacctttaaactgaaaaataatttctacctaaactcggtaaat  
aatctaaagtacagtagcttcaagcttacgttacgagttacgatttgttttacttctgctttagtatgatttttcttatttctatctaaaggt  
acgtaataggttctatttctgaacgctcgcagcgtcaactcccatttctgcttttggctttaaacttttaccaaatactcatatcaagatagaga  
taataaaaaatgctaactaagactttattagagaaccttgagaaacgtttaaaccatttggagtttaatttaagctttttgatcctaataaag  
aagtactatgtgaaacggaagtctgactgctagaatcaagtgcatatcatgaacttataatgaacataagagatattttaaactcaactgttctt  
gttcagagaaagaaaatcttattttgaaccagaattatcaaatttggatggcttataatgttttaataatgataccaagagacttgcagctatgaa  
caaaagaacttctcaaagattcataattttttaaacgaacaaaagtcgctgctaaagcagtttctgcttctgacagctttaaagcgaacatc  
atgaaatgcttaaacgaacagtaattttatcctatttattacattgagccaatgttacttcaaactcactactcagagtttaagcttgcgactt  
cggaaatagagaaaagagttgccaagaaaggacaaatccacaacccatagaatgaagaaggaatgagtaggggtttggctaaatccat  
catgaaacaagtctacaccattccaaaatgcttctaggttttcttgcaaaatattgagggtacatggatactagacggttaggacctactaacgat  
gtatatgtctgttaaagaagcaaggcttcttctgttttggtagttcttcttggcctttacattatgtctggtagggtgatttgaagtttatta  
ctactataccagcagggaaatagaattgggtgtgcatatacaacaatagcagcaaatgacatgttctatcaatccactaagcgtcatc  
tacaatagcgttataactaagaatggctattaaccagccacttctgcttctataggtgttctgggcatatgccagccaccgattctaattcag  
agatgtctacaagccctgttcaaggggaaatcctataaaagataaattcaggggctacgaggtttctgtagattaggtttaaattcgtcgtc  
ggcgactgttatcttcttggtaagtagagaacaaagaataggggacaaaggaaagctatagaacccttgggataaagatatctccagcca  
taatacatcttattactttcaacaaaatgaagcttataatttttctggttctagccttaagtttaccagcctggctcaagctagtaagttagtc  
gtcgcacacttcatcgtcggtaatacataccatatacgggtggacaattggaaagaggacattaaagatgctgtcgaactggagttgatggttc  
gcttgaacttgggtgctgatgcttggcaagttgagcgtatcagtgatgcctacgaagcagctgctagtgtatctactgattttaaattgttctatcc  
tttgatgatgacagctatgtctgagatcgggatttattgaaggattaataagaagatttctgcaaaccaatcaattaaggtgggataataaa  
atctttgtatcaacctttctggtgaaaccgataatctcgacgctctgatgttagttctggatggaattcagccgtaaaagagccactagaatccg  
ctggatgtccaatcttttctcctagtggactgcttgggaggaggacttacaacaaagttaactgatggcttggcttctggaacacatgg  
cccacaagttccgctgatagatgtaatgatgactattactataaacaatagcaaaactctcgggtaaaatttactgtgacacttttccacttg  
gtttttaccatttacagataaaaaattgggcttacaacaaagtattggcttattctggatcgttgaacaaatgttagatgtccaactgatatga  
ttgagattttgacctggaatgactttgggtgagttcattatctcgtaaaatccagggtgcttaccttctggatccgatgactatgtaattggttctg  
atcacgcgcttggcgttacatgatagccccatacattgctgctttaaagaatggagcctctaaaccttataatttgaaatcctcttttactggt  
acaggccaacctctaaatacagtttctactgatgatagttggatctcctcgggtggtgattataatgaagatttaattatgccgctgtttatc  
tgttgacgctgctgagatcactatcacttgggtacaaacaaaaaacttactggcagctccaggtttaaactgcttctcaatcagcatggtacc  
aggcaatagtcataatatttagtgttctcgacaaggtaaagagatggcctcgaacactggacctttaaattgagaagagtaactatgtttataacttt  
aatgcatatactggcagcttatttttaactcttgtttagctcactttagtttattatctggttactgttctgtaaaatgggtgtgatttttaa  
ttttcttgttttaagcagattctgctgccatctgtatacaaaagaagatagatattcatcgccgttctctgttaatgtgacaccttgtttat  
aatgtatccgaaaataaagtaatttctcgaataactatcagggttattcctctagttgccttctcgtgctttagtgacaatttctggactgta  
tattaatacactcattatgttactctatagaatgtacaagtaacttttcttggctacttcacgctgcttcttggatagaataaataatctt  
aatcaatagatttatcattggagtacataatcatttggagttgtaagttactactgcatacatgtatatactgtcgcattacacaagtaggcatt  
cataaaaaatacttattatagaacgtggctatgttcatgtttaaataatagaaagcagaaagcaaaacagagtaatacggaaacagaaaccc

aatgattaaagtcagtttaaatattttagtatccattaagtggttatagcccaattgccatgaggatatctactagacattcttcttttgaattc  
catgatataaacttgaataactcgcaagtcgtaattgtgaaagtaggcaaagtcataatgcaggatttcgcagaagaaggggaaaaga  
aaacaataagtcgacgaatagctatgtgtaatacccataaaaaggtcttttggtagtaggaagcagaagagctggtgaatctatctgaggt  
tccaaacgaattgctgaataactagtttccaacaagaattgcaaaaaaggctgcaaaagaaggtatggctggtttgcaatagcccagagg  
gatcaacttttatataggtaaaatatttggcgtaaaggctggtagagggatccattgggcagaaaacactctttctcatcaaggtgaattc  
acaagattgggtaagacgaaaactagatagacaacaagtggttagaattattgtttacgtcgaaaaggttcacgtaccgaaagaagaagca  
atattaaggagtactacccaattggaagaacgattcgttcatctaaagagccggcaaaataagccccttgctcgaagaatcaatgccaact  
tcttcgtttgttcgctatagcagtaggacgtcagattatcatctgcttcacggatgccaccaggcaaagcaactgaccagaccatcggtctt  
ttcacggaaagatctctggattaataggacatgaggaacgacattagaaggaattgtgaatccaataaggggaagaagttttttagggagg  
tctgtagcaaggattacggcgacggaggctcgttcgtgggtccatttgttactgacataggagcttttggctcaaaatctgcaagcctgtaagta  
agtctaagtcgaaatccatcttattcagagccagaaaaagaagaatgataaggtaggaatttcacataaaactgcttatttagagcaaga  
acagatacacaacctgctaataaataactcaattcgtaaaagaggatagagaagttcagaaaagattggaacaatgaatccgtagtagaaag  
gcaaccagttgctaacacggttctgttggtgcaatgtgtgagattcaaggatacacagctcaaaataaaaactaagtttggcatgcaatgtaact  
acgcgaattgaaataaaaagaaaacttattatatttggaaaggctgcatactactatttgaagcaagttaaatataaaatagagtaaatgta  
aataaataataaaaagacaaatcacaagacttactgcaagtactaaactggatttactatgaatcttcacactcaaaactacttacta  
caatcacaacaataaataaacaatagatgtccttttactctacacttactcttctcttctcagtcaacacttatggtggtagtattaccgtt  
tacagagtttactgtaactctttaaattgattcaggtgtgtattgtcataattaaacagaaccattcaccgcccgttctaagtcaatcgaaca  
atgcttttagtgacagtttggagctgggattatcaacctggagggacattataggtatgtaaagttgaaacaattttgaaggctgatg  
aagaatcccctgtttggggtgaaaacgacgaatcccgttcgtatctgctttggatgatcagttagaaaaggtattgtcattaggattgaaatgaa  
aagtgtaagcatgacaatgtttcgaacattgtgcccgttgggtgaaagcttcgttcagggttctggagtgcaagaatattaacatggttaggt  
ttatggtttcatcagaaaatttggaggacttgaatgaatcattgacgagatcgaagcccgttagctctccaacgaatcaccgatgaatct  
ttaacaaatgaagaccgtttaaagcttttagagcaactggactctgtaccgaattagttaaaaattagagaagtaacagagattgaatcttacc  
ggttttataagatcgttaaaaagcacgataaattacacagtgcatattcccttcgacctatttacaagttgactccgtgctgttcgcttggtaa  
tgtacaataatccaatttggcccgaatttctctatacaaccgctgctgcaagcttactggcggtcaacctcttgaatgctccccgac  
atattcactctcagatgacaacgtatctgtaggcgaacttatcgattctgggtccatcatgacaacctcatggaagtgaacaatttattatgag  
acgcttgcctgtttatattactctggcaacatggctttagcagaccgttctgctgtatctgggtacttgatccgatttcaactgtctttatttg  
ataatcctaattttagattgtagccaaaacctgaacgatctgagcagcgttttcattgcccctgcattggtacggaaagttgaattcaaaaac  
cgatattattgtagagcgatggttcgcgaaggcagcagctgtctcatagtgaggatcgttttggtttacgcgagaagaactcaatgaatttcta  
aaagaagcttacgatcctgaaagaagaagagtagagacgattctaccgatgtttccgcagattcttcaaaaaagcagcttacagaagatg  
tcaaaaagcttatcacagagtataactgcaacccgtgctaaggtccgtttataccgtacagcattccagatccccggtgatgattctgtacgtg  
taacttgattcagattgggtaattgattcggaagattcattgatcaagaacaccttgcctgatcctattgactggcatgacatgatattgac  
gatccgaattcctataaacatctcgttaagggtgagcatttctgattccctatagcatactgaaattcgagagtgcttaaaccagatgaag  
aagaaccactatgggtctcgaactcgcagttctcattgattccgaggttgatggatttctaagtagagcatggagtagccgtttgtttgaa  
agatattgccccttttggcagtggtgttttctatggagcaggacattaggaaagatcccgaactacctaacccttcaaaagatactgcca  
gtcaagtaataattatgttaaacgaagagatgaaactgtattactagtgaaatcgccccaaaaacttcaaaaaagcaccggtcgtttcgcgac  
gttctcaggctcccaatgctgaaatggcagacccccacatacaacagtttaagcatcctcatggagatcggtttaattttaaagattcctggtt  
gttaaagcctccacatgatcaattatcgtcccgttaaacatacacgaccccctcctataccagaagcctgaagttcctctcgtgtcagtg  
gtcctgtcaaaagtagaaacaaaagctggttgtaagagcgtacatatcttaactggcttcatgttgtttgtttgtttggttcccttcttagctt  
attcaacagcgaatgcaaaaacgggacgtatttctggtagtattatgtgatgcttgccttttcatgggatttacgcttggagacttcatgaa  
agcgttgaacttgattatgacacgtaccctgctcctatgactgagtagagggcccttattcgttggagttgctttagctatttattgattgta  
atatgacattgctttaaaggagcgggtggaacaaaatcttattgaagatgatcacgttcttgaagatctttgcaagcagttttctgagcatta  
caatgaagataagaatggtcttttagatattttttgctttgatgaaatctctcaagtcattcttgaatgaatgatacaaatagcatggtt  
ccacttgttaataggtgctatttatttattgattgtgaataacttttggatttccatagagtttactttagtgagtgctataaataaactag  
tattgctagccataaaatcttattctattcatgtttatcgtgaaatctataagtttgaattgtacggaataaggttaagaaaaagtaaaaagag  
atatcgtgaagctcacattaaccacaagtggtgactcatgacttccatgaaagaatataaagtttaaaaggaaggttaaacatttcaaggaa  
aagaagggtacttgaaggagcaggttggtatggataaacgaaggcagtttccatgtttgtatatagaaaagaactgtgaaatttcaaga  
tgcaaaatagaccgtaaatcccaaaaacaaaataaaaaataaaaaagaaacagcaaaaggaagaagaagttgcaaaaaca  
gcaagaatgacacagggaaacaaaagacagatagatcaatgaattaattatcgaaaaatccttcatcgtgaaaagcttccacaagcagtagct

ttatttacatcgacgcgacttgccggttgagcatcggtttacgaaaactaagtccttcagagcgacgattgtgccactcggcgaaaatacgacgc  
ttgtgtcaagataaataagacaaggcaagcgaagggctgcagcaagttgaattcagctgggtggagaagctgtcgatgttcatttagacag  
gtcaagagggggacattccattcactgcgcaaagggcgaggttgctttttgtcaagaatggacatgtctggtgagtaacaggaagcattc  
gtaaggggtattagcaacgtcaagcacctgactgtcgaagaaaaactcctggctggattgtttgaatctagtagctgtgactttgagtaataatg  
gcttcgagaggaagaagacactggagtagaagggcgagaatctgaaaagttaggtgaagccctgggttatctgcagcgactttgtttctacag  
tagtggagatggtactagccattcggcgagggcgcttagcaggagaagatataggagcgacatcaggtaaatgtcgtcgaagccaaagtcttc  
ccttaggagccaggctctaggagagtttggtagcccttcacacttcgaagttaaacgagcgccaggcgaagacgtagaccgaagagtagaa  
gtactgaccgtttgtttgaaggtgtagctcactacatcgaatcacatcccgttgcggacaaaaggctaggagaaagcgggtaaggagg  
aggagaaatgagatgttagtaggattcatcgcagaagagcacacatcttgcctcaaaagatctcgtcaacgacgagctggaagagacaacgcta  
gcgctagtcgatggggattgcatagtgaaaattgctcaattgtacttgcaaaagatgtacaaaaaaagaaaataagaaaaacgaaaaa  
aaaataagaaagccaaaataacaagaataataatgaacaaaaaaacagtttaacaatctatgaacaaaacaaattcaaaaaagaa  
cgtatggagacaaaagaatgattttatgcgactgaattgctattgttttagttgcttattgaaggatactttgttcatatacctataagaattgcat  
tcgtaactcagagcccaatgaatgtatacgaattggtgataccagatgctgtcactactcctcaaaaagagtagtctgtttttccaagggtag  
ggtacgtgagattcattctcaaaattcataactaaagggggaatgaagaccagaattatataaaaaataaagaaatatactctttttgtctaa  
acaagttccataaagagtagactacttaaaaggaaccatttgagagtcatttggatacaatatcccaaaaaatgaggtctctagagggt  
tgaatacagaatctttctttttctattgcagaacttttggaaaggttaggtccacttgcctttttacaggttaaaagcaagaaagcactctt  
tgacttgaattattatgttgatgcctccctcgcgatgagaaatataatcaatagttataaataaagaataactatttctgtctgttgcata  
cttgaagaagtggttatctttttattttatattatagccagtgtaaacacacccaatcatgaaaagagcagacgaaagccagggttaggcttt  
gcaactaaaaaaaagaaaataaagaatgcgttaagataaagaaccggttatctgggctttttgtcgtttttcataaacctatgccaatgtta  
catcttctttgtgccaaaaaaaccagggaatagagccccgacatttttctcgtcgaactatatctttgtctattttattatttctatttctt  
tcggctctattgttctgtatacaggagcaacaatcggtttgcttgcacttccaaaatccttataatcatacgttccatcatataaagttcttagt  
ataatacccgtgaaaatcgcatatgtttctagacgacgcttttataaggaaccattatctgtcgttgatttttttataaaaaattgaacgagt  
aaaaacaatttctcgtctgttttctactctgacggatcttccggatagcgggttctacatgaaaagtgtatagccattcagctttatagtgat  
ttgttttctataaactcataattcattgtacttctttgatcttattcctgttccaagtgtgactttaagctactagtcacacgttctctgtg  
catgcaacggcgattgtcgttaagtgaggactcctaaaagtcttagcaagctcaagagaaagggaaaacaagttctatacaaatctctctg  
cgaatgtaagcgtcgtcgagatactcatgtttgcccggacgaagaaatcgaaccatttctgatgaagaatccatactgtaaatctaaactcat  
catgtaagaaaaagggttttgtgatcctactaacgttcttcaatagctttagtttgaagaatgaccagctcaaaagtcgtcgaactagccgtac  
ataaaggcaaggtcaatgctattcgacagtggaatgaatcctgtccttatagtgtaagctgggttttttatttaattcaactaacaataatc  
aagcgtttattggtctgtccggtccctcgggatgcgaaaaagtaactgttctgattttggctcatgaaatgggtgctagcctgttgagtggtc  
aaaccaatggatacaagatctcagaactatcaagactataactgagcaatctcgtcgtcagagaaaagttcaacggttatgtctttggcaga  
aacatatcctgaattggaattacattcatcagcaaaagattgaggaaaaagaataaccagtgaaagcaaaaagttgttcttttagacgagttac  
catattgtcaaaaacaacaggcactttacaatgtttcgggaggttctccttccgattacagtcgagaggccagtagtcaatcatcttaatttg  
actgaaacaaaatccataaattccgagggaaactactttcaagataaagaaatgagtttggaaaccaaactcctgggtccagaattactagatca  
tcatcatgtctgtgatcccgatgaatcctatcgtcacaacattatgaagaagctatagatctattcctaagaaggaaaatcccactcaa  
tccaagagttccacattcattcaagacttagtaactccagcgaaggtgatttgcgaaatgctcgaacgctctccagttttattccaagaaaa  
ataaacagtttccatcgaagaaaaaacggaagatgagagtcagtcgagcaccttagagaagctccgaaatgctgacaaggatattcg  
gtagaaggattcactctactcggcacttacaacattccgatggaattggaggatgatgatgataaacagaaagaatatcaaaaggatattgg  
tttgggaatgttacatgactaggtaaagtcatctggaataaacgagaaggggacgacgaagtagtctcatcaaacgctcaacccctgtccaatg  
ttcaaacggaaaagaagaacaagacaaaaaggaatataactatattctggtttatttacaagaagcaaatgccctagaaaaacgccc  
gcttgggtggacgtcaaaaacagattgagcaggcaggccttccaggttccatgttctgatacggatctttgagaactatattgattcgtgcttaa  
ccaaatggaagcctattctgtgtgatattcaagcttcgagacaccatggcaatcgattaccgatttctgtatcaggcagatgaaatgtctcta  
tggttgcattcaaggactctttggatcttccgtcgcagttcctcgaagtgagacagataaaatccatcgtggcagagaagacgaaatt  
ccaatagacccttagatgattattcggctatctatggtaagtctcagacatcgaatatttcaacaatcatcaataatgaaaaccaagccttag  
aagaccagacgatccgattgaagaagatgatcctgcttaacgaatacaatataatgggtccaaactaactatgaaataaaagccacaatata  
gaaaactcattacaattcatagaatagattcattctttctttttcttaactatttatactccattatctattgtgtatggctacaactcttac  
atttttttcaaaaattatgcttcaataaaaaattcaaaaactcaaaaagtattttatattttttcagcttttcaattttatttctttacattcttaa  
gatactttgcaatttctttggcatttccggtaacatgctgtggttccattccactttgtcacttaagcttcttccagggttccgggttccggctta  
ataatgttacttacacctggaataacaaacgcttctcctcctcctcagtttaagcaaacagtaatacttcttactcagaaaatgcttcgaca

agcaggatctagatttatcagagctcctgtttgctgctaccgccattctttgtaagtttataacaagattttgaggctatgtttgaaacgggacgg  
gaacacgctcaagtagccgccaactgccaacctcatagttttttgtgatctggcttatttacgatcaattatttctctgattttattccgaac  
ggatttctaaccaagaagtgtagtaaacgtggctatgccgaaaagcagctcctactgaagttccttctatcttagaggtatgcaaatcggaaa  
acacttggagccctttaataccctaataatctttataaacatttaattcttttggattattgtttgacagagatggtttgagcgtccacaagcat  
gttacgacccgtaaaatttctccatctttggcttatatgatccgttagcttattttaaagatgattagggagactggaaggataaccaagaagaac  
ctgtacggaaaaaatggacatatgctaaccagtttaggaacgtatccgtggagcttacaaccaatcacaatgatggaatctggacgtgtttgtc  
cattgggtgatggattgtcgtgtctccggtctttccaacgtacaagctgaagagttgattgaattctctccgggtgcaaaaggtatggcttgaact  
ggaagcagacactgtcggatgtgtgtctttcggtaacgaccgtctcgtccgtgaaggtgatgttgttaaactgactcgccatattgttgacattcctg  
tcggtgaagcattgcttggctgtgtcattgatggcttggtaacccattgatggcaagggcccatcaagactactgagcgtcgtcgtgctcagtt  
gaaggctcctggtattttgcttagaacttctgtttgtgaacccatgcaaaactggtatgaaggctattgattccatggttctatcggttagaggtcaac  
gtgagttgattatcgggtatcgtcaaaactggtaaaactgctattgctttggatgctatccttaaccacaagcgtggaacagtggcaacgaagaac  
gcaagaagctatactgtgtttatgtgtgtcggtaaaaagcgtctactgttctcaattgggtcaaaaggtagaacaaaatgatgctctcaata  
ctctgttgtgtcggctactgcttctgaaagtgtcccttgcaatattggctcccttcgctggctgtctatcggtgaatggttccgtgataatgg  
aaaacacgctttggttacatgatgatcttccaagcaagctgttcttaccgtcaaatgtctcttctttgctgctccccctggctgtaagcttt  
ccctgggtgatcttctatcttctcgtcttctcgagcgtgctccaagatgagcgtatgaacacgggtggctctttagctgctttgccgctcat  
tgaactcaaggtggtagctttctgcttaccactaacttattcttactgacggctcaaatcttctggaaactgaaactttctataaggg  
tatccgtcccgcattaacgttggttgtctgtctcgtgtcgggtccgctgctcaagttaaggctatgaagcaagtcgctggtaaaatgaactttt  
ccttgccaataaccgtgaagtgtcttctttgccaaatccggctctgatttagatgctggtactcgtgctactttggaaagaggtcttctgctga  
attgcttaagcaacctcaatactcttctgggtgtgaagaacaagttcctctcatttactgtgggtcaagggctccttgacaagattcccgtc  
atcgctgtgcaaatgaaacaaaagttccttcttctgagaaccagtggtgcttctgctactgaagctatccgtaaggaaaggtgctcttagcct  
gccactgaagagagcttgaagggtcttactgaattttgtcttcttcaagttcgcaggtcaactcgcgataggtgctgctactgcatgagatta  
ctatctttatcctaataatgaaatgaacgattcaatatctttgtatttggattacctgtcggatcaagcattatcaattatattgttctgaat  
tgataattttacgatctgtccccacttattcattacaaaaggtagatagtttcttctgagggctgcttatttagctaaatagcgattagccc  
tataaaatataaaagctcgattattgatcttttaattgtttgttaataagtagctacttgaatgtatattaatcacataagttccaaaattttatc  
ataaattatgaaaacaactgccaaagaaggtagctatcttctttcaataagggtagcttgaatattagagaatcatgatttgcacaggaa  
taattaactgcacgaaatttcaaggtgttttttataatgaagacgttagttggaagattttcgaggtgacattatcatctttagcacatgaa  
caatcaaaacgtttcgtacattttttatgttttcagaaatgtaaggcactctgttcgtatctgtctttagtattcgagagtaagcgaagaagg  
ttttcggcatagtaagaatcataaaaccgcaatccacaacagggtctacgactaatgcagacgatataatctgtgatctctaaaattttaagg  
acaaggtaacctccaaaactccatcccaaaagtcagctgtaactgcaatataatgggtgcttatgagaataccagcgaattatcaatccag  
taataaggtaatgcaaaaaatcatttccaatagagagctgttagctatttctctcacatcgacttttacaacaaaatttccaacgaggatgcca  
tcaattcgtttgcatcatttctgactttccgtgatagatcgtgaacctggagcgcataaaatttcaatacggtagcatatttcttattggattga  
aattgctaggcttatttctgaaaagaagcagtaaacgttgaacattcactgtttcagatgcttagatggaaactcatagtttccaagtaaagct  
cgtaatctttattatcttccaaactcggagtaattccggaattaatgtcttctgtttgagagaaatccccactagaaatttacttagccagtta  
ttcaagcaagctttaaacaatagatttttgcattgggtatccccgggacaaaataattcagcaacatgtaatttgcgtcgggagatctttagat  
acttcgagccatctgaagaggatattttaaactctgctttagctgcaactccgtggataaacagaaaaatctcgaaaaggatcgtttgggtgga  
gagcgggtgaaaaactagattgtaagatgcatataaaataaaaaaagtaacttcaaaaaacttccaaccaaaaaattcaaaaacatataa  
gtcttccggcgttatatacataaaactgttatcgtcaaaataaaaaaggccaatctttccttgcgagtcacccatataacgtacatagccattt  
ttgactgccaacgatatttctgattcctaaggaagaactcaacggtagcagtagttctccagctcttctgtaagagatcgagacgaaaagtag  
ctacattatacttaggttatcctcgtgtactaccttgaagtctcaacaaacataattgactcatcttgaaccacaaacatcttgaatataa  
aattcttcaaaggagaagtttcttgagtgtaagtgatgaggtgcaacagaatcagaagaaaaaacaataactcaataattgaacattggaa  
tgggatcacctggctgagggtaatgaaaagcattatggttctctgttgcgcccctcgactgggacaatcacattttgaaataatgtactttgg  
aataagagaatcgttgaatgacaataagacagacaagaaccgtttgcagaccaccaaagcagtcggtgacatcaagatcttctcctgtag  
agccaatctgcaatcccattcaagatagattcagactcctcggcgtcgttatggaaagaatcggatcttcaaaccttgcacaacgtacaggtt  
gaaccatccacaacgcctatgatgaccacaggtgccactcagcacaataactgagagcttctgcttgggggggcaacgcgaccagttt  
tcgttccaaaatataatatttctgtaaaactgaatatctccactctttgctgactgcagaaatgccaatactccaagtcagacgaagctacct  
ttttagtaaatgagttacataactcatgaattgggactgaaaggccatgctgggtccatataagagacccctgaggaagaaaaaatactgga  
agataattgctttgatcatagtagctcaacacctctttgaaactaccattcgatttctctgatgatggcagcaagctccatcatcaaatcg  
agataaacttaaccgatattttcagaaggtttatggatccacctaattgtacttatgtaacaaaaagtaaacgaatacaggatagcgcaccc



aacgaacagacacaatacaccggccaacgaaaaataataaattgcctcttctacgagtttcttcgatactcactggcccactaggaaggtc  
gacatcgtttccctgtctcctgattgtagtaccgattttacatctcgcgaagaaactatagcacttcgttttccaatgtgctttgttacagaaccg  
ttacggccagctatcgatggctcgaccccatgaccattcattcatacaaaatgagtttaaatgatattatctataacgatgctggttaa  
agtaaataaatgttgaattacaacattagtaaataaataatatttagacgatttgcgaattccagcgagctatttaataaaagccaaaa  
acaaaaattcatttattaatagtaaagtaatatgaaaaacataaaatcataactagtcataactagaattgaatatgaaaatcattgact  
aaatcttcaacataattggaaggaacaaaccgcggtccatggcattcaccttcccaccaattaggatcaatctgatcgacatttgaataa  
aatcattctcataaaagctcaattcattgtcttctgagcttgatagtcataaatggctttcacggaagttgcccgaacatcctcgacattactt  
caggtgctgagctggagcaatcttctctgcaaaagctcaacataattggaaggaacaatccttgccttgcatttgaatttcaccaacca  
ccaaccttctcaacgaagctcaggatttggattttcaccttctgcaattcaagtctgttcttctcctggcgaataatcataaatcacaagag  
ctggcgttttgaagaagactctgggtcaatgcttaatccatcctcgttctccgagtttaatttcaggagtgaggaggaagaggtggttggagg  
aggtgttctactacaggtggaagaggaggtatagtagtgcagtttccgcttctcgtcagattggctggcatggcaggtggagttggtgaaga  
agttgcaagttgcttcagcagatggcgtagcggctgctcagggacaggagggacaggaggggaggaagatcctgtgtcgaacctctt  
gtgtcgttggagggtggaggtgatggagcgaagaggtcctggatgagattgcacttttggtagactcgggtctggaggcatagttggcg  
cagaaggagcttgcacatgggagccgatttagcaggaacaggcatcgattccggagcagatggaggattaccaacagagggaacattcttag  
aagactgaacgtcagtagtagcagttgaattggattcattgtcgaatttgcactggcaaacgagatcgaagaagcaacgcttgggtgattcg  
ttgtcgttctttaggctcatgcttctgttattgcaaatgcatcgactttgggcatgcttgaagtctgggtttgagctttgaagcagcagcaga  
ttcaaaatattgtcttaacttgggtggctgggatttgttggaggaccagtagaaggtttattgtcttctgaaagcgttcaaacatggccttctagc  
agacaaatttaccgttccactagcatgaagtgttctaactcgaagcgggacttttagtagattcagcaaatgtctctgaaattgaggggtcagc  
tctccttggcaggcgcttgcagtagaagagggaagcattaggttgcgaagaaattggctagaaggaaccgtatgtgaagcgtcgggctcggaa  
gtgaaattgggtgaacaggagcagcagcagataaatcagtagtgccttcttccagggtcttggtagcagcagaagtaggtgcagttggccag  
ctagcattcacgggaatacgaagagaagattgtcgagaaggcgttgtgtgaagtagtcttcaacgataatcttctggagtaggtttctcgga  
ggcatagtagcggaaaggagccaggagaggaagcttgagaacgagaagaagcaggagcaggagcagatgatggaacattgacaggttgg  
aagcagcagaaggggtcggagaaagggaagtattcgaggaatatttactaccacttgcgtcagcagacagatgaacaatcgtccagattga  
ggtcagaagattcacggcagtaattgtatattgtaaacattcaataagcagtaactgaggaagaatgaatggggaataagccttttcgaga  
actaggagcagcctcaccacaccaagaacacacaaactatgaagcctgtattgggtcttttacacgaaaaaccaaacaacacagc  
atttcatcaaattcatcaagaaattcataatcgatctatagtaagaaatgcatgttagaagaagaagaaaaagaataaaagaaaatacat  
acttcagtagcaatcatttcaaagtatttcttgcactttggcatatcaaaaacagcccaagagcaatctggagaaccattaaggacttgagc  
atgtgctttttatgtcaaaaccaaaggagctcgtgtctaattgaaatgacatgggtgtaagttaagtaaaggaaaaggaagaatcggttgag  
gattggtaaagagaatgagtgaaagttggctggctgggtagggaaagagagaaagaagcagcgaacacaagcttgtgaagataaaaaaat  
ataaaaaataaacagaaatgtagtctagaagaatacaaatgataggattggaaggtgctttagatggaaagatgagttgattcaacaag  
aaaccagcaagaatcaacagaaaagaacaatagtagtattcaagttctaaaattatatacaaaagaataaaagagtcactatatacaaa  
atgattggatccgaatgacatcaagggtagaagccaaaggaaatgcagaaaaatgcacagatagtagaatctttacatagtaggcatacag  
cattactgaccggcagcaatgtttagaagatatacaatgacgagagcggagaaaagctaattcatcaagagacatcaacgattatcgcaag  
ggaagcagaaccgagctttaaanaaacattttccacaaaatgctacaaggtgtagtacttacgaggaagcttcttggaaatagtggaattta  
agcgaagaaagagacagcagaagaagatccaattgtagaagcaggagttgaagcagggtggaactactgtagggcacggtagagttgataa  
gaggattgtagtagcatatggaggattggtaccgagtaggaacatggacaacagcagaatagatgagaggaccaacagaagaggaagaa  
gtgacggtatcgttgggtccgatagaacgcttaacattagcagtgaggagaggcagtaacggtgacggtatcgggttcaagacattgtaaaggt  
aacagcgggttagagacggggtttttgagcatctacagttcggagcaggtaaacagtggttagtagcaggggagcagggagcaggagagga  
ggaagaggaagcggtagatgtgaaaggcttctcagcaagtaggaagagccaagaaggcaggggagggagaccttgaaggaaagag  
cgaacaaagagcattgtgaaaagaaatgtagcgaacaaaggcttaagtttaagctaaagataaatgaaatagaaaaaaagaaaagagtaac  
gaattcgttttctgaaaaaaaagtaagaaaaccagaggatttataggagaatggagccaagcaaaaaccgaaacgatggctggttaagagcaa  
gaaagagataaaaattttaaatttaataagaaactctcagacaacatcatttcatgtgcatgaagcaaacagccatgaaggatgaaaaag  
tgatcaccagccttcttagcatagattatgcaaggaaataaaaattcatgaaaagagccgaaaaaagggaagaaggcgaaggagatg  
aataaaaaaaagaagaaaaaaaactccaaaagaacctctaaaacaaagacaatccaatcgtccacaccttccacttttcggtac  
ggtcaagagctcgagaattgggagccattgcaagagcgtaaaatcagtttacgaaataactgggttactaaagttcctcaactcgattt  
cagcgacgcaggttaaagcaaggtgaaggaataaagcgtccgtggtgaagatacacataccataccataccatgtcatgtcatctc  
atgtcatagtcgatggctgaacgtcttctgtagcagcaagcagagaggaagggagggaagagatgggggatagagttatttagtcaatgta  
ctgctatgatgaatcggccttagaccgtcaacgaccaccaaccgcaacttgagagtgaaacaaagagggcgcgctatagagagcaaaaaag

accatctggggataagaaaggaggaagaacaaagttgtgtgtaaggaaattggaaaacgaaacgaacaattccatttttcttgcttacag  
atgtgtggttcgtaaatgttttctttttatcttttcttttcaattaacttagctagcttagttctgtcttagctactctatcatttgaataccgcactc  
caatccatagcggtaaaataatattggcgtttttcccttaaagatatcaacccatcaaaccagttttcatttcatcacactacccatacatatcc  
agtcttttaagcggctgatgtcatcttgatgagatcccacctctggcttggttgaaaagagaagagatcaggaacagtttcatctgtctgg  
acaatgatgaacgaaagaaatgagaagagaggtaaaactttttttttttttttttttttctctgctttggctggttcccttaggatgcttgtctgtgt  
ttttctttctttcttgatagaacgaggattccagctctttctgggattttatgtactttttcattgtgtttctctctttttgtttctttgaattttcatt  
tggaaactttatttaagcttctttaccaacctgttctctgtgcctttctccccacaaagtttctcttctcaccctcttatctccacattatgg  
actctgttttcattacgttaaataattgttgacgaaccgaatttcattaccgataagcaactatttcttggaaacggtagcttattgtttcggg  
agattcactttttctattctttttctttgtttcttacttgcaaaaaataaaaaaaaacccaatgtgttacttcttttggcgaatctttctcttt  
gccccatttttggcttctcattctgttctgaattgttctttactctctgttttccccattttctcttatattaccctccgcttcgatatttcatcaacc  
tgatgtcggcaagttcagcttctctcactctaaactcgttcttgactcgtcggccgctctctcgtgacatcatctccatgtctttatggtagt  
gacttttacgttcggcatttgccttctttatcccaggatctcgattgtcggtttctactactcttataaatggccctctctcaactcttgag  
gacttctttctcaagatggtcgccttttattgattctctgttattatatttggtaacctcgttaacattgttctgtagtctgttctgtgtgt  
gtgtgtgtgtgtgtgtgtatatttctgttagttggggttctttcttttcaattttcaattcatttggtttcatctgttccggtttgattgcttgc  
tcaactctttactcttctgttctgtcttggaaataagaaataaggtttctgtgaatttcccaagacgattgtattcagttttctcttctct  
gttctattgtttaatagcaattgtttagtgttccaattgtcgtacgttattcgttgaattgttgaactaccttactcataaggaaattctctg  
acctccctctgtttctgtgtgtgtgaataagaaattgtttgttctcgtatttttaagaccatttagttgaaccatcagtttgtttgaact  
tagatcccttggattggtcccttctcccttcttttgcactgaactgaattccaatccactacctcgggacttaactgtgtcgtatctggtagc  
ttttttccctgtctctcttttctctctgtactttcatccacgagtgaaacgctttgtctctacaaacgggtttcgtttgtttggtatcacccg  
ttttatgctcaataattccttctgtgatcttctttacattataattataaccctttcttttctccctctttcattccaacaataactataatttct  
ttctttctgtttcttttcttttcttttcttttcttttcttaattcaaacctccctttccctactttcttttctttttgttgaatagcctcagaaa  
tctaccggccctcgtcgtcgtactgcccgttctgtgaccgatgtcgtcgtagaaaaattcgtcgtcattgcaagtgaattcacaatcaacctgtct  
agcctgtcaaaaagccatgccgaatgccacttttccgttcttcttggcgttctctcgtaaaacggctgactccctccattgtcctctcactct  
acttctctccctctcctcctaatttactcccgcgctcccacttccacaggctctccttctatttctcactctcataacctcaatactctggagacc  
gacttcccttccgcttaccctcttcttcttccgctccttcaaaccttctcatactcttcttctctcttcttctcttctgtatcgatgagcgtcctctgct  
gcaacgactaatacgtcttctccagccgctcacaatgctgcatatttctcctatttctcccgaattatttaccctatgactccaacaaa  
aatacttctggaactttccctcttacaatgataaccaacctcttcaacttcttttcttctcccttcttctcactcctcactttacatgtctcct  
cttccctcctattgaccatcccgtctcactaccaggttctatgaaaccgatgcatcgtcttcttctcctcctccttcttcttagcgttagatc  
tcttctgtttatccgcttctggattcgttcatcagatctcttcaaccatcttataccaaaagcaaatccctagctactggatttacttct  
ctccctctaccgtcagccttctactccgaattcgaatctcacaaccagccctgtccttctcaactgcttctactacgaaatttcccaagacggat  
atgtgaacaagcctttgaccaactccctatgttatctgacttgcgtcctcctgaagtccagcagctccttctcctaagcaagactcttgcgattccc  
ttcagcctccaagaatcagcttctgaattctattacatctgctcattctcaactgttgggtgattctgactttgactattcctcactcagactc  
atctgacactgcttctcgtcttcaaacgatgaactggcttcccagacgttaccgctcctcagtaactctatcggttctattgacctcttagtct  
agaaattgaccaatttacaatcttcatggaagcgttcttccaataacccttggaaacttcttctcccagttctccgactcgaatccctgcaagt  
cagctgttcttcatggactatgggatctcctcccgtcaatcattggcttgcggattgtgagctcttcttgggtgcttagatttt  
accaatgagaacttgggtgggagaatattgactctgagaaaactacaccattaaaaactgagaagcctaaactctaccggggcggcgctttt  
agacgacatgtcgcactttcaaaaaatctagatgattaatacaaaaatgtgtatgtatgtttttttcacctttttagcttagaaaaattgatac  
agatcacagaagactagggagggtctttgcttttttttttcaataacttctgtacaaatttttagtgcctgggcatatctttttgtaattgtg  
tttgaatagtattttttatgagaatattaatggaccttatttctacataagttatatacatgattgcatgattatataatacaaacggacc  
agttttcatgaatttgaagctgtaactattataacatttagagtctataaaaagtgaaggaagcaagtcgttttccattcataacactgttc  
atgcaacttttagcttgtttcttatgacccgttaactatttttcttctcttcttttttttcttcttttttttagcgtaaatgacagccttagtac  
gccaggaccttccaagataggggctgtagggagagtcgatagattcttggatcatctgctcgtatccacgaatcaatagcactcaaac  
ttttccaagttggcttgaacgagagcgggtaaggaagacaaactgtacatgtttgaattcttataatctcgtctccgacgcaaggccagcttct  
tgagccgggcttccaacagccaccgagctacgacacagaaaggtttaggttccaatataagaagctcgttgaagaccttggcttctttccac  
taacgaaggatgcatcctgtctacgccctgatcctgggaccactcttctcattgtgcttggcaactgagcttgagacatcttttgggtgtt  
gcgcaaaagaacattttccaatgctttttaattcatcttctattttgttgaatcgttctgaagtgaatttttatgcctagtaggtcggattgta  
ggaatgtctatcagacctaggaaagccatcttctgttaccaaaggagatgcatcgtaacatttctaaaagaattagtcataaccttacc  
acgagacaaaagctcatcacaatgggtcctaataccgatttaaacgttctgcaattccttcttcaatttcaagtttttcttttctaa

tcgtttcaactcttcattgtaaataagattctatcgaaaataaagaactgtatgtccgatccttgcttccgatattcgcgcttatgagaaatgcc  
acatcacacacagtcctagtcctagcagcaagcaatacacaatttgagcatgtctcaattgaacaattatagacatatccagacatatattaa  
aagcaaaagaaaaaaaaaagaatcataaaaaaaaaataaaaaaaaaaannnnnnnnnnnnnnnnnnnnnnnnnnnnnnnnnnnnnnnnnn  
nnnnnnnnnnnnnnnnnnnnnnnnnnnnnnnnnnnnnnnnnnnnnnnnnnnnnnnnnnnnnnnnnnnnnnnnnnnnnnnnnnnnnnnntccagtcgcttagcca  
gcaagacaataaccaaatttagagcatgtctcaattagaacaattaatagacatatccagacataataaaagacaaaagaaaaaaag  
aaaataacaaaaaaaaaaaaaaaaatgaaacgcttaactctcgatgtaattccattccaatgtaaacggggaatggatctttgacatact  
gtactcacgagatagaaacattcaatctccttaaacagagtgtaataaatgatgctttaatcttttcagttgttactttctgtcacgat  
actcagaagactgtcaagctctggacgaaccccaaaaggaaccaagatctcgtttccattcgacccgtgaccattttaggctctatgg  
attagcttcatatagaattccataaacaaccaacctctcaaacatactgtcgcgatatatgtctttgtaagataataagattatagatg  
cttgatatattaggacattccataatattaccagctaccataagcctaaggataatgtattacagatgataaacaacaactaaaaacgaaat  
acagaaccaaggtacgaatgatgtgaaaataagacgcgatacaattgatgattgtacagaattcctaactgatttggaaacattcgactgg  
caaggctaataagattgcttcatacctcaathtaataaacagatcccttgatattacaagcatctacatacatagtaactttcgttgtcat  
tccactcgatattgttctaataaccgtgatagttacagttacagtcgtggcacatacatataagattttagtataagattatataagat  
ataataagctcaatattatacgagccgtaaaattatagatatatacatctatatttttaattctgtgtaagcttctgtagcatctttgtct  
attacgatcgttccccgcacattgtaactcactattatgctgctatataagggcataggttagcctctataagcatttttatgcccagaat  
caataaagaaagagaaaaagcgttaaagctcaaaaatagaagttgtaaaaactttttttctgtctttcttttctgtttattttatccttct  
ctcgtttttgttttcttttgaattctgttttctattaaagtcactttcttattataaattcaatttcaactgttcattatgttctcatttt  
ggttgagtccctgtgttccaggaacgactcttgcttctatgccatacaataacacaggcaatagtaattctgatcccgacaacaataacca  
attttcagtactgggaagaggattgatttttctactggtgacccaatgttcaagcgttcgcccattgagattactgttccctttacgac  
aatatctgggatgactgttctaataatgcgagattgcaacaaaaggaatgttcaaacggaaccgccatctccttcttggacatgaagatta  
ttccaagctataagcacgccatagattggaatgaggattatagatatttaagaatctcacttcaaaactgatgaagatttattgattttcatt  
caattttacggagcgcataaattcagcatactacatgaggagtgtaaacaacggggcacatactgcttcttggattacaagaggtgaaccaa  
ctgaaaatggaggaaatgcctgaacctataatgatccccgttaccagctgctttatacaaagatagaaaaccagagcatcgtattttttctttt  
tcagtgtttctagtcttataagtttggtttggttaattagggtgcttctgtaactataaaaagaacactttaccagattcttttttgggttacgc  
tgactttttattgaaccatctataaaacgaaccttcttccaacgggaacattggtggtccaggaaaactatttcttataattcccgcattctt  
tattgtttgggtgacggcgtgacgccctttatttaattcattatattgggtcttccactcggttgggttattatcgacgtagttccaaaagctgg  
gtttttgatcattctactaggtttgtcaatcgcttttattgtaatgacacctatgattttcttcttacttttgaccgagtctcctaagcgaagc  
ctttacaattgacatggatgctatttaattaggctatctccctcaattttagtaatcagagctttcacgtttgagaatgagcctcaaataggac  
acgattttgatgataaatacatcaaatcaagaatcttctccttcttttctgcgcaatccttgtgagtgatactccaagcgcacacaa  
acttttaagtataaaccgaagtcataaaaactgtgttgggtttatgtacttctctttttcttttaacaaatgcataaataagcagaggttga  
aagatgataaagcagaatctcagaaaaatgcaaaaagccttgccattgtacaaagacgattctgagatggagtgcctgctgacgagaagct  
tcaaaaggttccaactgcttagactaagtagtatagcttatactaattccttttttttttaaaaaaaataagttcatgctattataac  
atattttctctcaaaaacttaaaagcattccctaaatttttaaataatgtacacattttcagccctcgtttataagtaaaacaagttgtata  
ttccaaaagactgaacctattgttcccttggaacattcaagtgctgcataaaacttcagattcttctctctcttctatctcgtatgataaaa  
cgattactataacctgcttcttgacctagacgataaacagatcaatagcctgagaattactgaccagctccacccaaggttccatcattag  
cgtatatttggcacaggttaagttcaagccaagctaacagcttggatgagatgttgagactagattttgtggatcattccgatattgttctaacga  
cataggcttggttcatgagacatcctgccatcaagagaatacttgattcttagagttcaaaaacttctatgtaatcgagaaaccagtaaactg  
agaaaagttacgggcaaggattattagaactcctgaatattctgaaaatactaatactttagacacagatatcggtcccaataatccattg  
taagctttattttcattgtaaactgtgacctaacttctcagggctcataaacatcgtccagttcataaggctgacgacaagataacaagtg  
aggataaatttctcttttgataaccttggaccttccagcattcccaagcaaacggtttgcaatttaacacagaatttcagttgggttcg  
aacagcacattctgaacaagagcatctagtgatcttggctgataattctgtaataatagccgggattggttttctgcgacgaaaacctccaaatt  
aagctatgaagttcattagaattatccagttccatttttttctggtttggacagaaagtaaggaacacaagcttgcgaaactgtaaaag  
taagcctaaaattgcagtaaaatatttaataaagctctgcagcgatacttcatgactcacttcttcttaacgataaggaatcacatattc  
gtcgttctgctccgaaattgttcttctaaaccgagtggttcaaaaaaaactgcacaacgtttcaagctttcaaaattacatttgctcatagg  
gtacagtagcgaatgatgccatgtaattgtatggcaaccaattgttcttattgtaaaagtgttcaactgtacaaatcaacgattggcgttctgt  
aattatccatcaattcagttgatattacatcacaggccttaggggttactgctgcgattctttatagagcaacctctgttcagagtcacttgata  
gcagtgaacagaaaataatcaaaaagttcggcactatctaaagcaggtctgggtgtataacgcccgtagctagtataaccaaaccagggaac  
atgttagtatcagtaaggaatcgtaaatcacagcgtctcaacctcgaaccattgtacactaggggttaaaagtgtattgaacctgaagcttc

aatgcttcggattgccattgatccaataaagacacaggtactactaccagaattgtctgtagttagtaagactatcagagtacggaatgttc  
ggcgcactttcaagattataggaatccctagcatttcaacagttgttccaatcccactctatctgctacaattcctcctcaataaaaggcgcatt  
gagaggtaaattaacctttcatcaccagtgtacttacgaaatcaatgagattcatcatctctaaagtgacaccttcgggaaatagtcaggga  
tccgtatgaaacaaacattgactcgtaatggcgcaaatggaagatgcttctgagaaagcatcacctcatcttaacacatccaataaagata  
tgttttcgatactccgtaaattaaagtaaactcttcagggaatcgaacaaaaagggagatttggttcgcttggttaccatgttaggtcacacattgt  
agttaactgttcacttacgagctgctcatcttcagaaaagctcttttaggattcatcgtaaaagattattaattgacattggatcttacctaaaag  
tccttagaataaaggctccaagcaatccagctgaataaacgggagcaactgaactctttgtattaggatctacaaaagcagcgggatcatcttcaat  
aaaagcagtttggcagaaaacgaagattggttaaagatggatgggaaacatccattttattaatgtttacatatcatcatacatagattattt  
accagaaataatctttttttcttttgacttttattccgaaataacgcttaccattcatcactcgtgccttctcgttccaaaaatccaatcatatactc  
atcaatgtgccgagagtatcatcgatagtttctgttccagttcttctcattttccaatcctgttctcgtcaaaattggattgctgttcttctcctc  
tatttctttatcgtaaataaggtgtcacttgaaggagaggaagtactttctcgcagaagaaactgcggttaggaatcgctaaactcattt  
ctttcaagtccgattctttccgagcaacttgagccgcttcacatcttctcatcttcagcagctgccaagcatcctcccaattttctcatccgctt  
tattcgggtccttcagcttcagcctcttccagatacctttcatctaaatcaacaaatctaaaacatccgcttttcggaaccattcagtggtaaactca  
cctccttgaatgacaattttatccagcatccgcttctgattcgtcttctgtagcatgtagattcgtactgtatattcactaataagacgataaataatga  
acatctctgtttgtccgatctgtgagatcggctctgagcctgagcatccaattgaggattccaatctgaatcgtaaaaaatgaccgtatcagcac  
cagtcagatttatacccaatccaccacttctgtagacaaaataaactggaaatcttatcatcattgttgaatcttcagttaatatctgcctttgtt  
caatctttgtagcaccatctaagcgaatctctatgtccatgtatatttagaaattgttccaaaatgtccaacaccttggctcatttgcgtaaagatt  
agtcacgatggcattcgagattaatcctcctcaacaatttgaaggactgtagcttgcacaatcactgcaataaccgacgatcaggaat  
gcaatagctagctcgttgcagcttgatgccaaggccaattgtcttgcatttttaggcgtcacgttgtatattaaggaccagtaaacagctcag  
gtaaatctacgacaaccgcttgaggagtgtgcaagcaaaatctgaaggacctcttcatactatcagcgcgctctctacgcttaaaacagaat  
cacgtaacgctgaagttgttgcaggtgtacatagaatccatttgcgaagtaagagtataatcgatagcacgacaattcctcggaactctctca  
ccattcgtatgaggttactcccgaatgggttacgagcgcatttctgctcattaagatattttgatggcgcattttctcaagttcgcgttcatactt  
ttgttctggaaatataatccaaatccgccttattaatgtgattgggagacagttgctgatctatttccatttccaataatgtacacctttgtcgaat  
ccgtcagacgcgcacagcgccttaactcattcagcgtaacagcatcaaaagattcggaaatctgtacagacaagtcgcaatgtcgaagatcca  
gctttctcattggctcgtcttctaaacagcttttacgaattaataatctttggtttccatatcagcaatcgagaccgacgctgagcaaatgaagta  
acaattggacgttctctgcaaattaggatggttgcatactttacgaagttgcatcaaacagttaataatgctcatgaaattccagatgctagaa  
tctctcgtgtacgtgcaggttaataaagtcatacagaaatctttgtcttttgagagctgacaatagacaacgtgttcatacttctcctggcatct  
gcttttccacctccgtttcagacgacgaagaaggtatggctgcaaaactctatgcaactttgcaacggtagtcatggcttctcatccatttcaactt  
ccctcctcaataagtcggtccatgggtttgagaaccagcttggaaatctttgagattagcaaaaccagagttagcatccgtaaacaccagcaggc  
ataaaaagtaaaaagggaccataatcaacaaatattctgtaagggagtacctgcaagagcaagcgtctctgcattaaagttagtaaa  
tgactccaacgttctgtagcaaaattttaattgttatgggcttcatctaggatcataactgccatttcttctgctgaaaggctgatgactgtag  
aacaagttgtaagaggtaatgcaaacgtccatgtatctggtttgtaccatctgtacgttttctttctcttctgaggattaccataatacgttag  
tattttaaataccaggaagaaatttttaaattccatttccaattcaacataacgctagtaggtacaacaattagatgtggacccaattttctttt  
acaggccaagtgggcaagcagagcaatgtttgaattgtttacctaataccatttctgtagccaatataaccattgtattgtctgtagaagtgca  
gtcaaccattccaatccaattgttggattacgtaggtaacgcgaaaaagaaacggaacatcaactttattcgtgtaatagtagagacttta  
ttctgtcaaaagtcctcgactacttatttcaactgttccgcttcttagaggtttgttctcgtacttcatgagaacgctttttgactgaacggaatc  
atcaataaagaagataaagtgtactcgttctcagattcttctcctcgttttaacaagtgattttcattataggaaatacccgttcttctgtagta  
acgagataaattatcattatgttcaccattaagtcttcttcttctgccaatttgtgaagccaactttctagctgaagaacgagtaattctgtagttt  
agtcggctgcttctcaatgcttcaatagggtctgataaagcttggcttcttcttggcttctcctcatctcagaggcttctcaggaatctgtttcgg  
aatctagctgacctcatcagattctcaatcagcattttaccgagagtattaatgacctcaagattactataacttaagctcagctctccaca  
gacaacgagctcatctggagtatctttaaatagttcaaatcattttcggaggttctccttaactttctgcttggtagggggaggaccggttgt  
cgttcaatcctagcttctagcaagtcgtagaatgctttaaataatagctagatgttctttccagctaaacgatgcgcttctcagcacgctctgtt  
cgtcttccggaacttcttcttattactttccatttttaccgtatctccaaagcagttctcttagccaaaagacgaatcctctgtcttcttcttggct  
tttcttcatccgctccagaaagcgtttaaagtcctaaatcataccggacaccttacgagcccagacgctcgtactttctcattatgcat  
ataacgggctaagcatgaatatgagataaaaaatctcctgtatgatacaggaggttcatggaacctggtcccttttaattctacaggagc  
ctcagcactgaagtatcccttcttccgaattcctcaattcagctcgaagatccacttcaccttttatttttctcagcagattgaaatcataatca  
ccatcttcaatgatacatatgacttcaaaaaatcttcaattttctgatttccggttctccacgacatgccagcatgggtgactataagctcgggt  
tcacgtagatgaacgcgtaattgaaatcgaagaatcttcttttaatacaggaaccaggtccatctacattcttccgactctcgtgaagtc

agaattgatctagtcatttgacttcgtgtagtggtagaaggatgaaatcaaagatgccaccgactgactacaaaatttcttgtagatgtaaaaa  
atagcgaaacctgtccttccagataaaaatccttttattatattactcaaagcaatcttatagttaagattttaaattgttaccattcatacc  
cgtatttctagcccttattaatgttacaagagttgtattacatttaaagccttcagaaaaaggctactagtaaaaaattggagtaaaatttactta  
cttataaaaatacaataaaaaaataatgtgctataatgacaagacgataagaacataaggagcttaatgaccaacccatgtacttcaggattctaa  
actaagtaaagtagtactactatccacattacttcaattaattcagagtaataagatcatattaagatttcattaataatctatcaacatgaat  
ataccaaactaactattatataaaacttcaatgagttattaagcgttttttagatgtccaagtgccatcacatatacctttctcatagcgtctgccatt  
ttagcttgcctttctcgtgaaatgtttataaaaaatcgttttgaattcgaacgatccgtaaaatccgtaggatgatcgttcattcctttctagttc  
accttcagtggtctgttgacctgcgggacatatttcttatcgtccctgatctataaaattccttattgcttaatttgcctaagaagaaattcagga  
ttgtttccggcgattgtttattagtcgagaagaatggtataaatgcgaagtaattctttcgcactctccaatagctcatccgtgggtttgtcataa  
tattctcgtatctttaaagtttaggtaatgttctgtttctagactgaaagcttaacaccttcaccattagcgtgtagatagctttgaggaattgta  
accaactataactataattacctgattttcggaaagcgtttctatcaattggcttcgagagacaggtggcagtaataaatcttcgatcgtacac  
ataactcgtcccatacgtaaacataacagtaatgaaacatctttgataaatgccgagcaataactgaaaaattaacgtcaaaaaaatcaa  
gtaaatcattgattcggattcaatctcaacgtcagttaactcgtggtcttcttttggctcttcttttggaaaagaagcaacgtagctcgatt  
aaataaactagttacggaagtcatagttttatcgaatccatccaagagccgacaacagctcctcaacgttgacattgataaatttgaactaat  
aacaggctccattttgtgacgatgaatcggatcattcactctgagatctttccaaatcatgataagttcgtcctacgtaaaaaccgatatgctctt  
tttcgcttccatttcgatccttagtaataattcaccattggacttaggttagccagcttctctcgtatgtaatcaccataaactttaggagttaa  
aggaaacgagcatcttccaaatattcatggtcaccaaaacttctttggaccataaattggcagtaatgattaaagaatcttttgcctttatttcaa  
aagaatcttccaacgggggtcatggaatgaattggtctcgttttccaattcgtttctctgttgcagttaggacgacataagaggttcgaatc  
tttcagcattatcgggctgtagatcttccgcaataacccttacagtatacaataaattagtggtagaagctttgtactttttagattcagcc  
tggtccagagcttgaactaactctgaagatctatttgccttcaagctctcataagcctgaatagcgtaatgtacattgttcaaaaaatacacat  
gaaagtagaaaaatgaaaggaagcactcgacagcaccagatagcattgttcgagcttttgataaccatgagcttgagcttgagcttccattt  
catttcgcagctccatgctttcatgtttttatcgtctcgtcaaaaaaggtttcaatgcccaactagtataattcgataaaacgatatacacaatcc  
taaagaatttcgtaaaaaatctagcattacaagggtatcttccattcaaaattcaaaagcgtacggaagattgatgaaagcatggaaaag  
gtcaataatagaactactacaggcggcttcttgttcagagatcaaaaattgtcttccgtaacgctccttgaagccaatggttcgactgacttcta  
cgtatttaaccaggaatccacaaaagggtgaaaaaccctcgaaatgccaagttcgtattcgtctttatggtaaaaacggagtagattaatca  
tttttttaagtcactgtaagcgtcaatcatgtcattcgtaaagagcatcaagatcgccctgagcattgcttgaagatgagcttggctcacttccattg  
cagatgctataactaggtaaagctacactggtaaataggcttggtaaggatattatgccgtagatagtgtaggacacgtttctgaataaatt  
caaccctgtcattcagagcagcactgtggagcaaaatctcgtctattccattagaagaggactcccgtgatgatacattaaattctttgaaaaaa  
ttctgtgacacacttctgtaactcaatgcaatcgaataaagtctgcttccgatttaagctcctcgtaacaaatttacattctcaacgcaaat  
ccagtaaagccaaggattatgataaattagatttctgtattcaaaatgttaagagagaagctttaatctttgtagaagtgtattccgattcca  
atcaaagcggctttagcattgatacctaacgacaattagcaacctatataaaaaataaaaaataaaaaaaaggaaagaatcttgaact  
acatctaccttggccagtaaatatttctgattcctcgtcactttagataactctcgaatagattacaacatccatcattgaaatcataccttt  
gaaaaatcaccagcaagttccatactcagtgtaaccgacttgaaggcaaaatcctccaataaatcgaacattcacgaatgaatgtactaacg  
ttttctcctcggaggatcagtaatggtggaacgggtattgaagacaaagtctagcagctgtcgaagtaacggcggtgaatgggagggatgca  
agttagagttggttccagggtttattagagttgattccatgattgctgttataattctgacaacagaggattgagctaaagcatgatttccgatg  
ttgctctaattttgcaactcaggggtttatagtagtaggctttagttggaaaaatctaaaacggaatgagaatattacaagcgtcatttt  
ggagatcgtcaattagatcgtaatatctttaaataagccgattcgtcaatagtaggaaacacatttccggcatccaacaaaacttttgatagc  
taccttaaaaaccgaagcaaagattttaagagcggaaaagaagaaaaatacaactttcagatcctttgtaaacgctttcagttaaaatat  
ctgtacgacttctgattttgattatacatatcaaggtagcaatgaattcagatgaaggagagagcagttgccgagcaataaaaatagatttac  
acaaatctataaatgaaacagaaatctcatagataaattacttccgaaagaacctaacgctttgtgagttcggacgaaactgaaactggtgaaa  
atcaggaataaatctcaattctcagagattcttcatctgcttattatataagggttctaatagattatagaaagcagcaaatgtaccacgaaa  
taattgttctgataatccgggttacgaccatactgatgtttcaagttcgttcaagttatataaaactctttgggtatttgagagctcctcg  
cttctcctcgcgttaatagcattgtatttactaaattgcagcaacttctgtcagcaatcaaatggcttgcgatacagactgtaatgtggaggg  
agctaagcgcgatattgaacaaaaaaagaactaaacattctttaaagaccagcttgaattgttaactgacttagaatccttgacaatagtc  
ttacttgatagttcttcttagggatagcttcagcaagctgaacttcttctgatggagaggaagaggttccgctgcaattcattcatttagcgtt  
gaatatgtatgcagataatagattttatgcaaatctgtagtatggtataaatatcaggcctaagcaataaataagaatgcaagtggtgtagg  
ctaaggataggtataaagccaatggtcatccagcaatctacaaatcgatgtagagagttttcgattctttagttatataataggagggaga  
tcaatcaagttataaaaaaatcagttctgtttattgtttaaattgttcaactttcgtactatgattataagagaattctgaaagttccgagcgtaat

aataaaataagaacgtaagcttgataaatgtaaacttattatcatcgaagaagattctgaatgtttgatgacaagctggatgaagttacgtg  
tggaactacctttgagattctacgaatcaacaagtcaagcagtcgatcctcagtttactagaaatccagaaaatggtaataaaagtttattgcatat  
aaaacttaacatgaattagtccagggttgcaacgatcgttgaagctggcggaaaacgttcaagcaacgagagactctcatgagcaa  
gttgattctctcaagaaataaaagaaaacgctgcatcgaaggcttcaagatctgatggggaaaagaacgataatgagtcaaggatagagc  
cactgagtataccacgtattgatgaagcaatctcctaaggaacggcgatgaatacaatgagttatcgaattattaagcaaaaataatgct  
ttcagggaaaatctttcgtattggctactgaagagattgtcagacttcagaaacacaaactaaaggtatgaccagaagtactacgagcatttc  
ctaaactaacgaaacaagaattacatgataccatagatgaattaaaaaagagctggaaagtgaacgaagaataacgaagatttgcgtca  
agaactgccgaaagcaaacagtataatcagcaagccatgaggagaaattgttagtcaaggaaacttttggcttgaagttcttctccagagc  
tgtagaagaaggaattcgtatcgttagaacaacgggaagacgtggacgtatgtattggcttgttaaaattcgatttttagaactaaccttt  
ttgatttagagttggaataccagttacttttagacaactcaatttcacgtttcacctgtttaaactcctcagcagatggcgaattgatggactat  
ttaccggaataccttacagaggaaatcatatttacaaggagcaaggaaagctattttcggctcgaattatgaaggctcttcaggattaaatgct  
ttcattaatcaatattatgctatgctgcatgaggactagccgattatttgagcgtcaagatctactctcatgtctaaagaaaatgat  
cgagagagattttaagctgtattcaaacggtttttctgttatatcgtaaaagtaaagctgattcaatcaaagttacagagcatactttgg  
gtccattcgcgagcgttgaatggcttgcctcattttcctccagatttagcaacatcattatccaaaggtcatctggattcgggtcccccatt  
aaggcttgaatagacaacaaaactgtacgaattgaagagcaggactccaatcctctgtttaccgttagtaaaaattcctcgtattacgttacgat  
gttttttttaaaaaaaaaaaatcgtatttcaatttcgtactttcaaagttgaaggcagattctaccgagttatcaacgttgggatgatagatt  
tagtcaagaaacgaacgctaggaggcatctaaaagtcagtcaactttctgtttctacaatatccatcctgcaacatataaaacctgcaca  
agaaaatactgttcacctaagtctcagcagaatgggaccgtattctccgcatgattccaacataccatggggattcttctggtaaaaacagct  
ccaagtggaaattttccgcatcatatgcagactgatgggctcctcaattgtaattggaaagtagcgaagattatcctcataggagatgctcaat  
tctgtggagggtctctcgttagagtgctgatttctaatttctgttagtcaacctccttgtaaattgtctaatactttacctaataatgcgtta  
ggaagagccataatagtaataggacacgtactgaatagttgagctgaaagtaataactttgtgacttgcaatggaataacaagcgttctct  
gtatatcttaaaatgcgttagtgatgtctaagaatggctaaaagcttacacatgtaacaaacgcatgggaggagcttcagaaactacctttt  
gcatgattcttcatctcggatttttgcgtgttatgaacattatgaataaagaaggttgaactgttcatgtgaataaggttttgcctggcat  
aaagaataatggagtcctcatctcaacatgagtgacgaacactcaatgtctcagacgcatcttctacattccattccgcttcatcttctcagtc  
gatcagaaaaaggacaggggacagacagacaacggtcgaagcagcccaggtgccaccagcttccagacgaactccggttcaaaaggcgc  
tatgtttttctagtgtaaatgattaaattacgtgaatgatcctcgaatcgtgatgagcttctaaaagatgaagggtgcttctcaagattccac  
agccgattcaagtacgttacctgtaaacgattttcattctatgacagatgatgaaagaatgagtgactctgaaaatcggctgatgaaatcaaa  
aaaaatatcagcagcttccgttgctgattatctggcagcgatcggcagaaacgattctagcaccactctactctaaactctgtttattcgtccc  
ctgttgaacaataactacaatcaaacctgtttcgtttccatcaaggagatcacctagtgatctcataataaaaaatccaattccacgttgggt  
ggtaccacaaacagaagaaaactcgcctttcatgttgatcagctacaagataaggactcaagttaggtctatatggaagcagttacattaatc  
ggcaactttcatccagtgatcaaccgttgggcaatgtctttatctccgttggtagggatgttgccttggcttctcgtaacggcttttagtga  
ttgattggataaccctacaaccacctcgaatgttgcgacattcacgcctgggaagttgctgacgccaatggaatgttcatgctgctagaga  
ccaatggattgatcagcgtcaaatcaaaaaatcgtatggaaccttgcacttctaagtcaaatgctattgaattatgcttcatggacatacc  
cgtgctgttactgatatgaactggcacaggcagaatccggatgttggctactagttccattgactctcagttcattgtgggatttacgaactcc  
caaggctcgtcaattcctttacgactggcataatggagcagactcaagtaaaatggaattatcgaatcctcatgctttagcatctagtcaggtc  
gttctgctgatctgggatgaccgttatggctctggaccattgcatacaattcagacttctggaagatcacgaaaataatggtttagaatttaa  
tagagtcaagtgaactcgtttattaactgtgctatggatcgtactgttaattttgggattattcaaagtctactattgaatccgagcattgattac  
tactgatgccccggttggaaagcagatttacgcccttggggaaggtgcatgttaatgccccacgaggtgataactccgttcatttatgat  
gtccgcaatcacaacgagcgtggaccacgaccgttatacctttccggtcactgatttagtaaaggaatttcttggagatgtcgttgggaag  
atattttcagataaggataaccgtgacttcaattgattacctggtctaaagatcgaatgtacgattatggccaatttcaaaggatgtgttgaatc  
aactggctgatccttcaaacagttgctttcacctcgtagatgttgcaaaaatacgaacgtatttctgtaaccaataaagaatgcgta  
acattgaatgaaaaggaatctaataatttgaagtcataaaggaaagaccgactgaattcagtagactggtaacgggttgttggga  
gtcgtcaaaaggttttccccaaacataagtcgaaaacgtcaaaaaacccaagtgcccatcaaatgctggattcatgacgcgctcagcgaagt  
tacaggataactaacctcctggttgcggaaattcaatggggcgtcaaggaaacgctgattgggaggttctcaaaacctgtgagg  
aactatctggataggtcaaaaatggaacgttaattttgaagaaatgatgtagctcaagaaaatgcagaatttctgtaatgcccccttatt  
gcccgatggagcttttacttttattcgcttacgcatacagtttcttttaggttaccgctttagctagccccatattccacttagaaaaatccagcgc  
attagcagatgaacagtttaacatactgtcaacgctgaatttaattcgagtcattgtatcacgtccaaaagccatgcatggacggatgcatc  
tctttcttccaggggagctacagccgacgatgttggaaattgagagaaagtgaggatgattcggacacttctgtaattctcagatgttttcca

tgaaaactttccaagcatctcggatttccgaggcggatcggtgctctccatattaagcaaaatattcctttacctaaaactgtgctgccattt  
ctgtaatgatactctggtttgttttctactacgcaacgtgaggatgcttctggtcatgcttcaattaatcgtgaaaaccatggtcggcaaaaattt  
cgaatcattcgggttttgaatgcgaataatacattgcagaatccgaatccgccaactttgatgaagattcatgcttgcacgttggtcatctg  
attcagatgaggattttatatgggacgtggatgaagccagtagaagcaacctgttttccaagatcgaagtagcttgggatcaacaatgta  
attctaataattcattgttcggctcacagctggctccccgagacatgtttacgatgaatcgttttcatcaagaggatcccaaaaacgttcgatagg  
cacgaataagacgactgttgaacaaggcatatcgtgaaattatttgattgagtgaggcaattcctacaaagaaacatctggctcgggagata  
tgatctgtggagacaaggcgaatttgtaaaaggaatgccaaagttgcaaaagctttggatcatcatccttacgaattcgtggctttttattgg  
taggatgatgaagtattggaagtgaaaaacaagcgaagggtattggaacaagaactattggtttgaaaatgggttttttaaaaacagttca  
gtcatttttagaccactacactgctcaggaaaacttacaatgtagcaatgcttcatgtgttagatgagccggaactttactcagagaataag  
cgattgatgaataaaaactaagaatcctgtttccgcaagtcggattcgaagttgatgaacaaaactcgggaaaactgtcctaaagcggaaag  
gggtgaaaaaatgtcaagtcagtcattgacgcattcttgtaagcctgaaaagaaatctggtgagagtagttctgtgtattcttaggaaagg  
ataatatcatttgaagaagacattagtggttcatgttaggctggagatagatggaaggaatgaaaaagtgaatacaaaaaggaagaatgc  
tttggcgattgcacgtctgttttctttggagatcagcttatgcaggacttttagaccaatggggatttaacattccgaaactagaattataaat  
tgaatgctatatgcgagaaggatcaaatgatccataatgatcatcagggttctaatgcattgagcacgaatcatcttcaggatctattgctctaac  
gaaaatcagaagaaaagaattaaagacaacgttgatgaacgggtgtcttttgaactttcgattcagggttatcgaaggtgtgcaattctg  
ttttcatgcgattcatgaagaatgttttatgaatggtttctgtgaagatacggtaaccaatattgtccatcaagctgtggatgtcattgtcaata  
cttacaactagaatgattttgtgatgatgacttttttttcttaatttattctgatctatatcgtttaatgctgtactcaagaatttaataat  
gataactaaactttgtcggtttaattggttattacaattccaagttctggtggttaataatattttgttcaaatgtttatggtttcttttattgt  
ttattatcttctggaacttgctatgctgcattggaggagacagtaattagatataagctattattgcttagcattctattatccattgcaacaaaca  
gtcaactaatataaaaacaaaaatacagaactcatagatccatcgactttgtaaatgatctacatgaactaggtaacatcgttggtcgtagtac  
atcttctgttttaaaaagtaaagaagcagataaagccaccagcataaagtcctttcgaatcaacaaaattgtgtgaaaaatggaccaaaat  
aggtcactgcaagaagacgctgaaggcgaagaaagcagcaatacgaacctggagtccaatacattcaggatccttttaagcgaacaaacagt  
tttaagaaaagaaaagcaggtttatttaaaaaggtaacgaggattgtccataggagaaactccagattttctactattgttgggttgagcag  
gaatgtaaacagggtgctgctataaacaggcgaatgaactattatgctcagggatcagaggatcaggttaattgtgtctctgagacaggattag  
tcatacatcttcgacgctaagttagaagatgtgtcaaatctccagaaggcagaaagtgatctccacagctgaaaggaattaatacagat  
gaaaatggtaagaattgctgaaaaaaacaagataaaggaattgaatggcaagttcttcagaaaaatcgcggtttcttttagggatgcttga  
cgcgctcatctttcgggtacaatttaactaaagattagcagattggtgacgtcattgaccatcggcaagttgtgaattgtcaaaatctttaca  
aatgaaaaaacagaaatcagaatgaattgatttttttaattctttatgctaaactttagaatagaggaaaaagagttggtgataaaaatgatca  
agaatctactccagtcattcattcagagacagagtcaccaaaggataagaattccaatttgattatggtctggatagaatgcaggaaattcat  
ctggatatccaacagaaagtactactgatcaattttcatgtcattttcacctcctaatagaacagcaagtcggtaaagaaccactatggtatcccc  
aaaagctctccatataaattcaagacgtataattttctgcagaaacaaaaggccatcaaaaagtcaagaaggatattccatgccagggtgaag  
aaactgatgattcagatgggattttccccggcgatttgaagaattttcaatcaattatccggtttgtccatgaagacgaacaacatggaata  
gtcaatattcttgcaacgttcggatgcttttccggtcccagttgctcctggtcgtcgaacacagaagaagcgtcgtcgaaaatctgaaacaaa  
accgaggtcgagctcaaaaagcatgctatgacaccagagaaggccgatttagagtcacatcacaataaacaagatgaagattacatcgtga  
acgacccccttaattcctcttagtcggttgcttagtcttctcttctactgaaactcaccgtcagatgaaatgaggtttatgaatcagaatta  
tgtcctcccccaatgatgcttatcaagacatccttatgctcaagaaactcctgctccatcatactatcaagtccatgatgattattctttccagt  
agagccttacgacgatgggtatcaacggccagaacccatgacttcagttatagcccatttagcaaaggggaaaatattggagacacagttagt  
aatgatgagttttggttatgtgtacgaatcttttatgttaataatttttaggcagtttttaattctattccaacaatataaaaattgttttgttt  
gatactttctcaatgagttctcaagatgtttgtctttcaaggtccttagctaaaaagtaagttgaacgattctgtaggtatttaaaatcagc  
atcattctttacatactttataaaacataaattgtttttttttatgtttctggaaggaactgatctttcattgaataaagactaagaatataga  
aacataaacctttttctgagtggtttctgctcaatttactaagacactaaatcaaaaataaaagcttctactcaagttacgaggcgtagttacc  
ttatgcataaatcgaattctcaccctggaaaaagtaaaaatgtaacaaataactaaaagtgaacataaacaatggaatctaataagtaac  
actatcagatgaacattagtaaatcttattaaccgactatagcatgctacattatgtcacggaatatcaaatatcaacgctcaaatcttcggta  
aacgagatttctcaagatgttggcataagaacgaacgaacgatctttaaccagcatcaaggagattgctattgtaaacgaattaaaatgtcat  
tgtcagatgagcaggtacaagcagaatgcgcaagatgattagctttatcaagcaagaagcgtcgaaaaagccaaggaatccacacgctca  
gtgaagaagacttcaagtagaaaaggccaagattgtcgtgaagaatgcgaacaattgacagaaactatgaaggaaaattgaagcgagttt  
cgatggctcaaaaagattccaagtcgaacgtaataacagaagccgttttagacctattaacagtagacaagaagtcattgacggaattttctcc  
aaggtagaaaagaactagaaggaattgaacaaaagaaggatgcttacgtcaaatttttgtgtgacttaattgtgcaatcagatggaatgttga

gtgaaccagtcggcatcatctatgctcgtcaacgtgatcttgattggatccctagccatctctaaggctatagaaagtttgaagaacaagaaa  
cctttaagagtggtgaaattgacatcgcgatcatgatgaatacttggatgattcttctcggcggtattaaagtggtcggttaggaggaaaaattaa  
aattgacaatacaatgaaggctcgtcgaattaataaaaaggaagctcttctcaaaccgacatggttggcgctaaccctaacgtaa  
gcacctcaattagctgtttcgataaacttttctcgttacgggtatttaattttatcgcaatcttgaacatttttacttaagatatattgt  
ttctgtaatagccttgggaagttttgcttttttcaagtcattttactgaaagcttttttcaagttatcacgttctcactaatcaacctgga  
aaaaatgctttaccactaataaaaggaatcctttatgtatgatcatttacgggttgataattgtgtcctcggtatcttgaattgaaatcctgcgaa  
atctttatgaaaaaaaagtttgcggaattaacatatatccttaagtttactttaataagacttctgttattgatgtctgctacgtgatacta  
ataaaatcggtttagaaacttaaccctgacttttattccttctcgtttcttttacctcctttctattcgttgaggatttttgggtgtattccttgca  
gtattcctttggcggttctgttttcttactgaaacctgatcttttcaatcgcttcttaattccgaataaacatctgaatttcataatatt  
accatatatagacgatgaatataatcctttacctcacatctcgataacaatagatgctcggtcgtaccgggaatggctagattaagtttgcgaatt  
ttccaagatcaaagacaagtttctccttttaaatcgagtcagctactgtatagctaaaggtcatagttaagaataatagatcagtgtaatc  
ctcattcctgcatcgatccagtaatgtatcaagttgctcacagatagaagaaagatgaatgcgggttcaggtagggtccccagaaccaatgaa  
tagctaaattgtgcgaaaatgaacaactctaggggaattggaaggtaaggatgataaaatgcttaccatacaggaggctgatcagaaagacg  
aaccaagtcgtaaaaaaatgtggctttccgatgtaatagcaactccatgaatttcataaaagacaatcggcagctatgtccgactttgatatt  
aacaagcagcgaaaaacatctgtactataatagattgaagtttctgaggacaatgggatacataagttgacaacattgaacgaaaaattaa  
cgtcagatgaatcattcaggactatagacatacttctttggactaatagtttctgaacggacggattggaacgcttttgggtattaaacctac  
cttttggcaaaacttgcctatagaagaaattacatccaatccagaatcgcgcttggattgaatgttcgaatgtagatatttttaagcattccagcc  
atgtagatcttggagggaatagaacgaattgaaaagcgataaaccaggacacaggatagattgaaggaggattaaattggaacatgcaa  
caacctcaaaaatataaacaggacaattaagtaactgatgtttcaattcctctgatattgaaaagtttggtaaatatataagcttctggttcagc  
caaagacggattatagtaatggtattgtaaggtccggatctgacagaatcgttcgtaacaaatgaagacttccgatccgagattctcattgact  
agattactatgccaatttctcctggtttcaagctgtccttctatagtaaaagacttctcactgcaacttctcgttctcgtttcagttcatatcat  
ccagagtagcagtagcgaagacgatctatgctcatttatgaagagaagtcggaagatcattctttaagtagcaggttccgagaacgactgt  
tagtctcctttgacaatgggatttctggaatgtgtcaaaatcatctgaatcactattaagaatactagatctaaagttcaaaagcattcgtttt  
tcttcgagaagcttttactcgttatttccattgacggagaaatcaaggatccaacatggaatattgagatgagattgaaactccatagtcgattc  
acaagaactcgtctcaagatcatgaaagaactcgaaacattcttttatgttttaacgataaaaaatgtgataattgtatacacatccatg  
accaaggaactgatgatccagcagctataggggaagctaaaaagattctgaaggaaggtacgcatataaaagatttgaattctagtttctatt  
tctactttataaaaaattgcttcatatcgactcaaccatactcaacttctgaatgaagcaatagactcgcatttcttgaatataagctactt  
tttgagcatttaccatggatttccgtttgagaattcacttctcaagagcaagttcctcccttccatgacattctcttgaaaatgaattcgaatt  
cggcggagatttcttatgacacagaacgccaatgtaaaagcagtaatttttctttagacttgaagagatgacatttttaagtagcatttatac  
atacctttgttgcagacgtttgcaatttcatcttaggaataatctaccttagctccaaggattaatggtttcaaatgaacatctaaagaacc  
atcttatacatatccagtaattgaagtggaactcttaagatgtaactcgtcaattattgctacaagctgatgagaaaacggaatcttgaattt  
tctcataagaagatcctacaggatttctcatatccacagttcctgttggctcaaaatgaacatttctgatcattcttgcgccaattcagcttca  
atgagaatggcaaggaatgaacatgacgaagaacgctgttttccctgttttagaagagattcaaataggtaaaagccttaaacattctgaaa  
attggaactctcaagctctatataatccattgtcatttctgcttctgttttctgcttacttcaagcacaacaatataaaagcaaggtaaaatct  
ttcaagttactcatttaagcgtcttttaataattttccacggacatcttctgctaaataaaagaaaaccctaaacaatcttactcatttctttt  
tcgattttcctccactcatttctacacacctttcataaacttgaatttctcaccatcaaatcaagaattaggtaaaaaagtaaaaaaatct  
ccatttttctcgaatattttcaaatatgggcaccatgaaaaacataccaactgctttattaataatcaatgagcgtgctgattcttttggac  
aattgaacaaggaagaagcgtttagattataagcgaatgctgaattcaatagagaatcttactccgaaataggtacagcaatatcttctt  
acaaggataattatgtacacctaagtcctcaaatggggataacttgcgactatagatgcttctaatgttattcttcttgcagacaatcgtttatt  
gcaacacaggaattgaatgacattatctgtgtaactacttttccctttaggtcctacactaaagacaattctcatttttggagatggat  
ggcaatccgtaaatgatcatggaatcatcgtcatgcttaccagttgcaagaggccttctgactaagtgcgatttatattggcctcagaaccg  
agaaatcgctacaagtagcggataaaagtgacttatagtgaaaatataaaagtgagtcctcgtgatgattgtacagtagcgaagttcgtgta  
gaaaaaggctgaagaaaaagacagtgatcattttattactgaatggctgactcaagagcccaaaagcaacctctatttttcttattact  
gtcgttaaatcactagctcatacagtaaaatccacaagctcctattgtgtcattgttcagctgggtgtggcagaacaggacattatggcac  
tcttagagctcgtgaacagaattgagtttgatctcagaaaacttctgctggaatccataactgaaatcgtgactgcctcgtatgaaagaat  
gcaatctgtgagctccgtaacaactcattttctgtacaccatttctatgaactcctcaaatgcctttcccaaggttcaaaattagtcctc  
ggattcgttattctcataaagcaaacattgacattagtttggcttctcatggcaacgcaatcattccattacatgattattggatattttctaa  
atctatctatcctttttgtccttcatgagaatgcgattatgtctgatcaacgttttagtagggggacctgtctaaattttgaatagagctc



aattccatgccttcagaatggcagaagaggataaacgaaacataatcttacaacgaggctaagcccgaacaatcttcaccttgaatccttc  
gaagtacactgctgaaatattttctgtaggacgatccatatttcatgattttcttctgctgtttattataaagtttaatagaaaaataagcataac  
atagatatgagatttggttttcatttaacatctttccaagccatatgtgtgccttccctatacgcaccaagcccagttctttgacattgatcaa  
aatctacttcaacactctagatcttgaatatttaacctgtactttataattttgcttattacctttattccaccccaaatatcattgatcgaaa  
atatgatgctcccatcttatttacagtttgaattcgaagcgctcttggcctctttatagtgtaagaagattcaagttatgaagctattctgttt  
aagtttagcatttctttgcttacgtaataacagacactaacgcgactaggttactaattattgctacgtatctgtaagtcgtgaactaagagagct  
ctaaaaacacggaatataaatggacaatcaccatggctcaattagacttaaacagtggtggacagtacactaaacaatctttctataggggatt  
tgcacctgctttgccattccgggtaagacaaaagcctgccatttctgtgttcttcttctcactttggtttctactgggtttcgattatcccgcg  
tcgctactcaactcacttagttgtttggtggcctgttggtagtgggttcagaatttgcgaagcgtttctactgtaagttctcattaaaagatt  
ataaaagtctccattcccttttgcataaaaaacgaacgggtgttaattgctttattagaactgtttcacaataggttttcacgctataaatag  
ttacgaacctttgatgctttgatatttggtaagtagtcttctctatgccagtattataaaaaagttactttgctgattgatagccaatctgctag  
gttcttctctcttattgattaatcatgtatcataagcgacgcttgaaaaattcatttccaacgttacggctattgaactctgctgaagatg  
atttggattgcaagctcaagaatccgaagacagatatggaggacgatcctaactgtgcaacataagcctaaaagtgatgttctttctttat  
tatctttctcttctgtttggaacttcttatttgccttataattatgttcatctttttgtagcttgattatgtcttaagttttctcatgaaaaattcaaag  
ctttatacttcatgattccttcacgcaatattaggcaatgttattatatacatgtctgtcaatcattgtaagtaaaagccttttattaaagag  
tttgatggaatgagaagcttgattagatcttctgataaattctcagttataaataattagcaaccgagataaattaggatagatgagcggg  
ttgacttctctaatcttaaaattctgatttctcatgaaacgtttttctaatgcaagcaatccggcttattcaataactgtccaattaagtccacatt  
ttagtgcttccacggaatgaaagcttttaagttaaaggcaaatgggggaccaaagatccagagttttgatgaattcctaaaagaatcaac  
cacttaactgtgcaaggctaatcttcagcgagttttctatacttttaagtagacaaatagaccttgacttgaagtggtgattttgatataa  
agagcgagccttccagttctgcactccacgacggaactgtttttttgtgaggacaaaataaccaacatctcaaatgaatagcttcatgcttt  
tttgaggcctcagacaaaacttgcgaaaacctttgaatgaatttagttgtttgataaggataactgactgggtattccactgataggtcaggct  
cccaaacctttaaagataatttaggtattttcttctccatggctggaagattttatgtctttatcattcatttgttgtttccagtgcatagtgacat  
ccataatcaacatttgatacactccgagcaaaaggaattcgagaggtacgagctgccaatagtttagtgccttctcaagcttgggcctctccta  
gcctttagcggaatgttaaacttttctgaatgcgtttccaataaaaaggaaggagcgggagttcttctgaaaccgtgttgcctaaacttac  
caggtgtgctactgaactcataattgacgttttaaaatggggtttccgattttagaacatctaggctttagatcctgaactccccttataact  
gtacagagataaaatcttttgcgagaatgaaagggtaatcatccatacatcttttctcagctcccctgtatcggatcaagtagcttataaaa  
tgccatacttcagtgaggaggaagataaaaggaggtgtatgttctgatttcttagagtaataactatactgggaagatcaggtgaagggcaa  
cttgcctgaaagtaaccatagcggacttgatcgttggcctctggaattgatgacgcatagcttttcaaaccgattatgaaacaataagaca  
ccatcattgttacattcaaatagaaggacgaagaaggcgcgttatagtagtcttcaagcctaccatcagatgcaactttattgctttaaaggaca  
cattatcagacattgaaaaatttttgcagtgcaaaaatgtcgtcagctatctgctgtgagagttagggtttgcttcaataaccgatcgggctgt  
agtatagacgacaccttgatggagtgatatactcttcaataccaaagaccagtggtcaaaaaggcagcttcgatttcttgcacttttgaatttt  
ctttcatggcttttagtaagaccgcttttaattgacaagttattcgataaagagctaatggctgcccagccatcattaggattggacgcagca  
gcataggaacgtagcaaaaattgatatttcttcaagaattaaacgaagcttcaagggcttgaatatacggaaagggtattagatcgaat  
ttgtgagcagtcatttttgagaagaagcaatgttctatagcaaatctgttcaataatagtagttaaaggcaacagaatgaaacaatc  
ctttgtacaaaaacttcttgcgattagtaggcaccatcggttgaaaaaatttcaaaaagatggtccacttttgcgttctctttaaataataa  
attaccacaaagaatgcgtaaagactgtaaatgtcggaattttcaaaatcgtaaagagatagtagtctcaagaacccttctgtgataattatc  
gtcttcattagataggagaggcatcttattagagacaattttcttgaaccattccaatgtccatagcaactagtttggatcacaggtacca  
ttttcaaaagaacttacattaatggaatgaacggaagcagcttcatcttcagatctatagacctgtagattcattcaaagctatgttagtttatc  
atgcaagctccaagaagaggagtagaaaatctacgagcattttcgtcatccactccatataatgggttacctagccgacgttttagtagttttggg  
ttgtttgattatcagacggagcatcgtcaaaaacgaaactcgaatcgggagtttgaagttttcttcaaatgatcataaaagtcgattgattg  
cctctatagaggattcattacataggtgacccggcgtgatttataagagggtatttagcgggtgaagatggttaaactagaaagtattaggt  
cggcactgaatggagggcaaaggatacgtcttcaaaaaaggagagagaagtagtaggacgagcgggtctttttgggatgtaggggtgaaatc  
tcgaacgtctgtgaaagaccgtaaggaggggaccttttaattcagatttttcttgttttgccttcaacgaggaattgaatccaagaacag  
actgagagcggaaatagatcgattcagaatcagcatccgttttcgaccggactaccgaattatcttcatcgatagattctaaactgatgacggaa  
tagaagatttttatgaaaccaatgagcgggaaataaccgcttcaataatgacttctggatgacgtggaagatacagatgaattcgacgagatt  
gaagattggtggcgtgactccaccggttatatatattgcgagaagaatgttatgagtagagagcttaagtcatacctcatctgactttacaa  
gaagcatcaaaaattggtcacaaaaaagaagaacaggaatcaccgtgtgttccagggtaaagaacgataaattataaaagaatgaata  
aaaatacaagaataaaaggaatgacttttggtttttaaacccggaactgtaaaaagttcatacaataaattagtttaagcgaagtgagagat

agttactagaaactactaccgtttataactaagttaattaaggcaatccctaaagtaagttttaatatcttaaacgttttttcttaatatcttagaa  
taagataaagaaggaaaaacaaccgatggctctacatcaattgtattctattgaagtcagagggttcgtactgtaaggcagaaggttttat  
aatagataaatttttttgaatcctaattatacagagttgtatagaatttgcttacctaaaatcaaaaaggtgaattaccgatacacttcaa  
caaacatgaagcctacacgcttttctactcctgagaacctcaaatgtaaaggattatttctgttaccatctgcccaggaagggtcttctt  
ggttcctctgctggacttggctcaaagacaaaatggtaacatggattccccctcagcaatgcaagagatagccaattctaccggtcttctttgaa  
caagttcattctttatgtatgtttctgactcttactgctgtttgtaaatgagtttctctttcccttctgctgtgactaacctattcaaatacac  
ttaggatatcccatcgtttgagtgcccttgcgctccacaattgcaatttgaattctggatgtgctgtcataaagcaagcagcaggatt  
atgataatttgaagcagctcgatccgttctcaaccgtatggagtcgaggtaaaaacgaccgtatgtttaagttcttaataaaatgaaaaata  
ccagtttactgtttaggatgtttgggagctgttatggctgccttggtttaatgataaaatacacacagatgctacgaaagagttatca  
aacaagtaattcaaaagaattatcttaaatgaatggcttatttgaattgtattagctctgctgaaagttatttatatcagtgttcataaatgacac  
ttcatatatgccctttctactatggttatcttgcacaaccgttgagagcaatacagattctgagtgatacaactataagactaaattatagcc  
ctaatgacccgtcaaaagggtgctatttgaagttccacaactcaacaatgaccaagaactactacatgtaaaatacgaagttacttactat  
cggtgacataaagcctaaaagtaagaaaggaaaagatttaaataatgatttatatgaatatgattatgccaatgcttatgaaactatgcaatg  
atgcaaacagaaatgcagttatgtatgttgatgctatacactgtcaaggaagatatcaaaaccaaagttaccttacaatgacgaatgcat  
cgctcaataaggagagcagcgatagaaacaccagccattgacggctaggggcagaagaagactcgtaccagaatgagagccagacttgg  
cggggccagagacggctactagtataaaaccagatgtactaccattagcgtcatagcagcaccagagccagagacagagccagagcttca  
cgttactgccggtggaagaggcagaaccagaagagctcgttgcttgtatagcttgatgagttggggatcgcttaacgtcaacactagtggaa  
gaagaatgaggaccgactaaactagggcagtggttcttcttgggttagaaggagcatttaaaccaaaggttggctgcacatg  
ctgaatgaattgtcagcttgagaaggagatcaggaagagggaagctcagccagtttcatcattaggtgggcaactaagaggcttgggattctt  
gttgtagccaccgtcaccggcaaatttggcagcttctgctatacttttctttaaagcttctgtaattcttctgtagtttgacagagttaccattaagggtg  
accaaaccatagttgcttcttctcagtgattcataaaacaaaccaccagagaagacagaagccatcttgcgaaaagagggtatccacctc  
gttgaaggacgatcaggggtaccgtcagattcaactaaccgtattgcaaccgtattcagaaggaataagggaatagagtaattggcgaaa  
tctttatcggtgatcatatccagagaggctaaagctagagcccgaaccacaccattcgtacatgttcataccataaaagtgcagcagggcctca  
tcgtcatcaccacaagcaagaagtcagcacattgaacgcggtttcagcaacatctgcagcggagtaaccaacaggaattgacgcttcgagt  
tattcttgatatttcttggcgtcacggagagcagccttgaaccaagtagtagtagcagcgttcttgggctcattggcaacctcgttaccagcaa  
gaaacccaaaagctgttataatccttaaaggcatcgatagaagcaaaagataccttgcagtaaatggcattataactgaaagcggtatccaaa  
cgagagatggagttttagaagttgccaagtccaaaaggacataaataccagcatctcaagttccttcatacattcatcatgattggcagtggtg  
ctacttgataaacacgaatagattgacgtttaagtccttcaataagggatcacgcttgcagttctcagtaacggccaatgggtcagttgtcga  
cgaagaacccccggttgtaatacaaccacgaagatagaaacgctcattagattcgctattaagaatgattaccacgaacctcaatatga  
gggtactggcactaacgatcgtccgatcgaagtaagcgaacgaatgtgcaaaaactgcaaaaagtccatactggcaccgaaaataaa  
aaaaaaaaaagtatggaatgaaaagaaagaagatacaaaaatcttaaaaagaacgatgcaaaactaatgaaacgaacctcaacaa  
ctaaagaaagaaatttggagaatttataaaaagaaaaagaacggcctttttatcaagaaataagaaaaagtaattatctatgaatc  
aaacaaaaggctgtaataagaatattcttataaacctttgtcaagatggtaatggccaagttaccttagggctaggaaacccttatataccatt  
ccagctgacgcttactgtttccctcataataactactacaagggttgagatgcccattgcatgacaaccgccgctgtgggcttttagcttaaa  
caaacgaaaacacgaacatttactcagagtaaacgaaagacacgtgaaagtaatttacaatctacaatgaaaactgtatagccttttcagtt  
ggaaaaaaagctgctgaaaatgggggggttcttttgcgaaaatgaaacgtaatgatgaaaccaacgctgaaacaaatagtaaacatgtga  
atgtcatcgaagcaataacccaagataaataacaaagaaacagtaaaaggataaaggataaactaatagtagataaaaacgcagctgg  
atgaaatgataattgacgatctttcacttcgataagtaaggaacacattgactcaagagcacgagttatgtaaaagttgtagtaattgtaattt  
ataagattaattgaaagtaatttttagagaactattgacttcgagaatttatccaactggacttgaatatgatctatgaaactggaaccca  
taggttcgactatggataaatgccttcatgttgaagctcccttggatcttcttctgagttaatggatgttttagcaagttacttatctaggaat  
caacctaatgaaagtaactaagctccggctctataggttcagtaaggaaccagccatctttacgaactgtgaggattctgaacctta  
atcatccaagactgcttttgaattctctcatcattatgatctctatattgtccaacggtggaacattctttattatagtgccctttcattgg  
aaattattctcattttaaaccgataaatagtttgagacgttcataatacacaacagttatgaaagataaaaagaaaaatgaaagatgacgagga  
aaagatccaatgcaaaagttgactatcagtataaacagaaacctgattgaaacacctccaatggcagactcatacactattagccag  
ccagcgtttttcatcctgacaaatatacctttctactcctctgcttttagtaattgtcagactgctgcagcaagcttttagagcaactcaaatgt  
caatcagaatcatccagcatccaactatccgttatagatgaaaaagaactagaatataaccatttacagatttcttgaagatagataatta  
aactgaaaccgttccagattgctttcatatgttgaacatggccatctccagtagcttacccttcttgaattttaaactaagttcctat  
atctatactgctggtataaaaaattttaaagaattcctttttgtcgaaaacaaactaaatgagtaaatagtgattagtaattgggattcatgca

aagatatttttttgcgtatcggcgaattaatgtcaggcacatactttccttgcatactacattggaccaagatggactcaaaaatagcttagc  
tcaaaatttacagcctccttgggaagcgatagattgtgtcgatatacaatacagagcgtcaaaaccttcagtctacgaaaggtttgaatTTTTTcaa  
gcgttgaatggctcgcaagtggtggaagcatagtagtggtagacagagaatcaaaaattgacgcattggccaatttcaacaacaagactgata  
cgaatgagccatcattgacgttgataacagtggaaaaaatgccattacccttcagagtgatttacagtttcatggcatccctctcgaaataa  
tcagaagctggattctgattgattgattctccacgagagattatcctattcaaattatagctttcaaaacagcaaaagagtttctgctgtttacgt  
tgttgaccactgtgaacgattcattggttctcactgcatggactcagccagatggtagtatttaatagctggcggaacaaataacttttattat  
tcaatgttcatctaggccaaaagtctcctgtttctacaaccaacaagtggacatgagatccctatgtgggaaaccacactcgacggagttaat  
ctagcatatgtcttaactcaagatcctcgaacgatggcttgggaacctcaataatacagttgggattatgacattcataggagcaggccatg  
tcagcttaagtttctggtggcgaacgggtaccggggttacgatatgagatggcttcagacgggtacgggctgatgtaggaagctgtagaac  
tcaaatgaagtttgggatattcgatatgctcaggatgctatacagagataaaaggctcataatggcgatacgaatcaagaattgttttgatact  
ttggggcaggaaggactgtaagtgagggaacagatggctgtgtttcaatctggaagggttcaaaactgtgaaaaggaaaaagtaacaatc  
aaagaacataacagtagcagctgtgaaaagcaccctttgattcctcttctgccttgtttatggacgaagatgtgatattatggatgatga  
ggacggattttctcgatagagtagctgggaaactcattcctcctcaacttttgggaatggagaatggtttagcttaaacggggaccattttgt  
ataacatcgatttttttatttaattcaatttaataaataatgaggggttgaataaagttttaaagcacaatgtaatttaagactcatcattgattc  
ccaaggttaataaaggtctgtgaccaagctaaccagttatgtatatacgtataaacttgccttcgcttattattgtccatgcacataggaaccta  
tagttacaactgaacttcaatttatcgataaattacagctgaactcctatcgaagcattcaacctggattgtagtaataactactttgaata  
aagagttagccacggtaatactgttattgatacctcctatatacagtagccatgcatgcattacatgaacgcttgaacacacatcaaatgtattc  
ttttctgatgaccttctttaaacaactttttagtaatactgaattcatttgaaaaaataaagaaatttctatttatttgcattgtgacgttacacg  
tcagctggatctaagctttaaaccacaaatacaacaactcaaaaactagtttcatggagtcattgatgaaataatccaagaatttattcttcaa  
catgaagtgttaatacaatattcatgtatgcatcttggttcgttggattgatattgcatataaaaaagagtataggataaaaaattgacttt  
ttagtcttgaagcgtcataaaaggcttataatgatcagaagcgttttgaatttcaatactactgaaactgtcacttatggagtaacgg  
cgaaagcactacacagtggtgactgagataaagcagagtagtagatgcttacaattggatgaaagtatgaaatcaatgatattat  
ccagaaggtcaaatgaaatatttttcaaaaagttaaaattgaaagaaatagagacatttcatggatcaaggataagtagcttcttaagcc  
taccgacgaagtagaatacaccaaaagttagaagcgtattgaacagcgttttaccctcggttaactcagattaaagtttttatgaaagtctta  
ttctgttacaatacaaaagtaacactggacagaggatctatagaatggacattaatcagatacggatggtaaagaatacgtccaagaagta  
gaattctcggatgatcaactaggttaattgtgtcgaagaagtataactacatgtagtaaatctgtcagaacatgggtttctatctttcagcta  
gctgtattactcggctcctaaaagacaaagaataaagtattacacaaggagctaaggttaatttttttttttttaaaaattccaactctgcttt  
actcaatttccactctcttctcataaaaaactaaacataaaaaaggatttttaaccttcatgtatccatcaagtaataaacaattttccacact  
tcaaaagtaacaacgtaagtagcatactttctgaagtttaacaacttttgaattagcttctatttttaataatgatctgcagcgaatacaaacacg  
aaaaatttgattccactatgtatgtatgtagcagtagaacgaaagttaacgcgaaaccatcaaaaatttttcttcagattttataaagggaag  
ttctctattaagctgtttttatattcattaaaaaatcaatatatgatattgattggtagaattgcccctagaacgttgattaaacgcatttctt  
ttgacagtggtgaaacgaaccagaaccaaataggtgaccacataagaaaagttgaaacttggcgattgaattgccaacgttttctatcgat  
ccgtcttcaaacataaaaaatggttactccaaggcaagaaaaaacagcgttccggacaacctcgattgacgagaaggaatcacaataaga  
aagccaaagcaaaaatttatggtaatgctattgtcgtgaaaattgggatatgcatgctacattgactcaaaagtaagtatctaattgtgaaa  
aggacgaagaaagcaagcaatctagacaaaaaagagcattgagcgtctcgttaccggcagtttgttatgaaatctttttggagtttatg  
aatgcaccttagacgttctcgtttttaaattgaattcatatgctaactactgttttagttatgagcgaatgggtcttgtgtgactccaattatgt  
actggcggtaagaaaaaatcaaccagagccaaactcaaaagaacgagaaaaacgctgaacctactgcagaggaattagaagaagttcg  
aagaagcttgggtcccggcaggctattgttgaagggagcgaagggaacatcatcgagattatccatggaaaagaacgtacttttgatgat  
attttggatgaaaaagtaaatctgtccctgctaagactgaagtcacaaagaaattagaagaagaagcctctcggaaagataaacctcgcaaaa  
aacttcccttaagcgcctttagctttcttatgtgtctaaactacttaacaagtaggtactgaagattttgaaagcatggcaaaagcgtgaaatt  
gaatccgaaaactttaagctctgtaaaactaagcaaatgtacgtcgcagcaaacataagaataaacaatttttatagtatcgtttcaaaaa  
tggatttaatacaaaagtttgggttagttaggattttggatgaaaatattaaataacattctatttctataactcatgtaataatagatccttatt  
tgtgtacccaatatatgtataacggaaagtaaatcttgaaaaagcagtgtagctttgacaatattgcggaattaaaaatgccataaattgt  
caaatcaccataatttatgaaatgaaagaatcaatttctgagcatctttaaataaagtagcagcaaaaagccataatgacaacaataataaagt  
gtgtatgcataataatcataatgctaataaattgaaagtaggtaactgccacttaagcaatgtaaacagtgctccagtaaatatcttaagctaa  
atgccaaattatcctttaaagtctaagctatcacacaattcaaatgtttacgaaatttacccttctgttcttcttgaactggtagcttctgcaccac  
aggcttgcggcgtagtctcagggacagacttctgaatggctgacattgaggtatcgtcctgcgattgagaagtaatataggggttgaaggtgc  
actgctatagtttgcagcaccatgtgagtcatttgacgtactagtaggaggaagactttcaccattttcaacaattccttcaaacctcctcaaacct

cagcagcttcacgtgtccattattagaggcttccgtgtaccagtaaagagcctgttctgaattgttttactttcaaagatgtatccaataaaaac  
tggcggttggcatttctgccattgctgctcgctcagcatgtacaaggctgatcttcatcaactggaacatcagtagcaccattcaggtaccatt  
agcaagcgcaaaatctgcctcagttcacctgtttagaggcagcagagtaatagagcacagaatactttggactataaaaacagccgcactttcc  
gaattcatagactgcaccatacgtaaaagcagaagattgtcccaggaatgcagctcgtgcaaagcatttcaacgcacgctcgtctattatgg  
gaatagctaagccctccgatctaaatcgaccaatccagggtgctcatgtaaatcaaaagggcatagctatacaatccagaaggacatcagc  
atcagcattgttagcactcagttctaaaagttcaatagcgcgagagcgttgttgagcatatgtccaatattatcaagcattccttcaagaatcaat  
aaagtaatctccaacaacaagcactgtcttaagctagcacctgttcaaagattcgtatggactcttgaggcttcttggctcttagaattac  
accaagtctataaagacttcgagataaccgagtttggcagaagcagaatacagttccaagcttgtgaaggtcaactcaacatcaaaggcac  
cggattcataagataaccgtcatgataaagagcacgagcattttcagctcttgaatattcccgaatttatcaaggcagtttcacatacatttct  
aaatagtcaatttctcatagtttccgctatcataatgttgaatacaggaagataaaacaaagtaaaacgaaggcagtttctgaccattctaag  
caatcgtcagggttcatagaatgggctaaatcttcttgcgaatccagctcagttgctctcttccgagatgggcaaagtaaaaggcaaatcg  
attgtgacctgcttctgtaaaggatgaaatgttgggtgtagtctcggtgtaaagaatcagttgattgtgtggataagcagtgctgatacttc  
gtgagacatacagagcgggtgtaggagtaaagggtgagatcagacttcttaggcagaaattctctattataggtccgtctcttgttgcattcgg  
atggataatcttcagacgtagctctttaaactcgtcaataacatgcttgaagaagaacatttgggctgaaatagagaccgatcttttactactagc  
actagacacatttgactccgagaatcgttcattcaggagcaatcatatccaataccataagctgggttattttatccgtctcaaaaggaatg  
ttagactgaacattggaaagatagtaagcaccaatcttagaagctaaatgaggatctgattgattgaagtactcaaagttgagcgttacggga  
gcttatttgggcaaaattaccagtacttgcactagcagaacgtaatgggcttgatatttctgatacgcacatgggatttcttgcgtattcagcactgt  
cagaatacattctataagattaaattaataaataaaggagagctggtagaaagagcgaaaaaacgtaaaaagagagaatttaaaagt  
catatgcaaggagctatagaagctcctgtctaaaatgttgaaggacaacttcttctgagaattatattgcttagcgtccgctcctttcaaaa  
gctttaaacaactctttaaagtaaacgttaacaatgtatcatccgtactgggtgctggttgaactttgcaagtagaaatccaaggataggatg  
accagccaagttaatgagtgacaagagatgtacctaatcttctgattggtatttcaaaagataaatagatcaggcaaatattactgagttcaatt  
aagaataaattcaattaaaggatgattgatgctgtagctgtgatgtaggtaaaataggaggaagaaagtagttcagttgtcagcgacttag  
aaattgaatttaattcatatgttcatctttaaatttactgcttacgtgaagtatttaaaagaaaactatagaggttattgctcatgtaataata  
cttcatgtggaagaagttcaattgacgggcattcatatcactgatcttttctaccattttctagccagcttgcacacctctctaatctgtgtctt  
cttctctgcatctcaaaactctgcttcccacttccggtatcgcgtttccatcatatagatgcttctacgattcgtccatcaaaatctgctc  
ttgcattaaccgatacatttcttctgctcctcgttgttgagaatcgalltgaacaacacctcaggttcttggctacacagcatttggttaa  
cgctccacattttcggcctcagctgtaatgtcttcttgatcaagtaatagctcaggttgagcatccagttcgtccaatgtaaaaatgtgcttc  
aaaacaaaatcttcaaaacgcttctcctttttcatcaatttcttcaacctctcccagagcagattttctaatcatgaattagtaagca  
gctattgaaaagaaaagcttactgtaattgtgtgctgcttcttggaccttcttctgactgaatcactaacatctcgtattattgacttctcttct  
tgaatcgatgcttcttgaactttcattttactcctgtaccaaatcgaattctgtatcatcaaacagctgttctgacagttcagatacttctact  
acggaagaaaacgatcaaggcgtctccctttaaagttccatcatcttgtatataacttaactcctaggcgtacctgtgtcaacgttttccggcag  
atcccacattagaaaacttctgcttctctgatatagtcacgtcttgggaagacctgaaacataaatagccttatttattggtgcaggaatttc  
attcttctgtaagaagtttcttcttcttctgcttcttactgaagcattgggttctgctcttctgaggacgaattttctgaatgttctcttcttca  
gttatcgattcgttcttctacactcctctgagcagaatcctcatctgtgttagattcaacaggaaagctacctaataaattcttattctcaaaa  
tcttgagtctttaggggatctgcttctgtagtcttgaataaaaactctgtttcatacgtattcctccagattttcttcatcaatataact  
aattctgctcctgaggtcctaaacatctccatcttctgtaactgagcgtccaaaactggctgcaagacattcttttcttcttctggtatgcaataaa  
acgatgtgtagttgaaaccgatttctcagagtcggcaaaaatgaactcgtggaagattccatctaagactcagctaaaagtttttcttcta  
aaaaaagaaaaagatcgttttaaaaaactgtttaaactcgttctgagaaactgaagaagctcggattgaactcctagcgtctcttataaaaag  
gaaggaataagattgacaaaacaagaagcgcagattattagtgattatgagttgaaaccaatattccatgactttgcgtttgtgaaatgaa  
tccttcatcaagtcatacatccgtctcagagacaaagtgttcaacaacacgaattatgagaacaaaaaaagaataaaaaggagttt  
aacttctgtgatacacatctgaaggtttaaaaagtgaaaattgtaacctgaaatggaagaaataagaacgcttcatgccctttacttaacgat  
gaaggccatcaaagcgaagactgaccgtgaattggatatcaattgacactttggcgaactaaagtaaggtcagctaaaaataagtcagta  
aagaacggttggactgaacgataatgtcaatgacgagatcgtaatgagcttagcagcttatggagtcgtttcatgatgctcagatacgtggtc  
cttgcctttacctttattgggaaggattgtttgctcagatttttcttattataagttttcttcaagcagcaacgaggaacaaattctaatgagt  
atatgagaaggacgtaatccatatttcttactttattccaagaaaaactcatattgaaggattgtaaacagcattcaaaagaaacctacaat  
gattttgctactcattttccagattatccgaatccgctgagattcgggtcttcttctgaaattaatcgttcatcaagactcgtcctgcgaaatcctgg  
cctgaatgagaattaatgcatcttgttcttgaacaagccattccaataatctatattaaagcatattcaaacagcgaccgaaataatcaagag  
tcaatttcaatgaactcgaagcagcgaagcaacaaagtatatcatgacatacttgtttgtttcgatttcaaacggaatgataactcttagaa

ggagcaattgtaacttactctcattaatttcattgacctttggggtaaaaacacttgaacttttatagcacatacgggtcaaaaatthtaagcgttc  
ttatggattcggccttactgtatcaggatccaatataaccaccagaagaaaaatcggttccatttatgaaatatacaacgtactgattgtgttt  
actgagccttccactttattgttgactcaaaatctttgtatagactaacactggctgctcatgattgaaacggttacacgcacaaaaaagttcacc  
aataaagaaaagtcattctcacgaatttagcgtttcagctaactggttttggaaaagcatcctatatcaaatctacttgataagagacatcttggtg  
aaaaccttcgacttctactgttagaaaactccaagttgaaattaattcgttattctcttaattgtttttattgttgataattatgtaaagcatctggtt  
ttgaaacaaaaagggactacagcctcgatatcattagcgggtatttataaccattcaacctgttcacagtttttttttctaaagtattatagcggca  
tactacaacagtttaatgactgtatacactatctaaacatttcgtaagagtttcacccaaacactcaaagaaaactctggctacgattgcaactc  
accataaacattacagttcagtcatatgaactgaacaacgaattactaccataacaaccatttgcaactggcacctacatagacatactgca  
aagctacattctctagaagaaaaattaagagtaaaaagaccaacatctaaathtaacaacccataatattthtaacgagtaaaaagtagtct  
gaaattaattcttttctgattgaaaaaaaaggggtatttcaaccgtaaccacagctccctgaaaacacgtagacggaaatgaccccgcttt  
caaataataggagaccaagataatgagccaatctacaatcagcatctctcatcaggaagaggcatagcagcagcctcgttctttctgttg  
gtattgagccaacaattgttggctgacttgaacctcaggagggtgcaagagcaggagaagcaacaattccaagttggggttaccaaccaactta  
cgagcgagccataagaaggcttctcgaagttgtagttagactggcggagatgctgtagtattggaggcttctctgcggtggaaggtaatagcc  
ttagcctttacctacgctccttaacatcgacctgttaccgagaggacgtagggaatgtttcacaacacggacaagatcacctattgtagacg  
ttagtaagagtcttctttcttaggatgagataatggaaaagaaggaattaagtgtcctcaatttctgcaatcatacttgaaacacaaccaacc  
gctattgaaatcaagcaaatgtcattttctgtgaactcaatcctttcgttcttctcattcctaaacaaacatacggcaccagtgaggacggtt  
cttgaagtaatacgagaagtaacatcgaacataataataaccgattgacctgaatataataaccgtcacgaagaccaccgagcttctcttgac  
cggcagtgcccaacgtgaaagcaagttcaccaagttgggtggaaggtgaaggggtgaacttcgacaccctattcatgttagcatatcata  
aatcctaataccataaaagcattatagatgctgatttctgaacagttaaaaaggtttaaaccataaactgtccaatthtcggccaaaaagccga  
aacacacaagaaggctacaaagcgtctgattatcttctctagacgcttttaagcacacaattctacaatcctgctatttatgcaaatctacat  
accaaagtagcaatgtacttctttcaaaactcaccagtcacaaatggcgtttgacgaaagtggtcttaccagtagaccaccgctcctcagagaacaagc  
ttgaaggtaggaatgtttgttgacatgtttccttcttttaccgcaccgaaactacctgagttggtaaggggaaaatttagttagcgtaat  
ttttatagaaaagcagtcctgcataaaataaacctaaccttagcgatatggtttctttagaatctgacggaataggaaggataaaacaccttt  
tcggatgattaggtgagagagtgaaagtgcagtaataaaaatacagcagtgcaaggcggttaaaagagtagaactggcttattactataaaaa  
aaaaggataagaaaagtgaaaaggcttacggagaatctgtaaataaccacacaatgttaaaggagcttcatcttcataacatgaaattc  
gacgtcttaaggaacggctaaaacatactgtatttacaaggtgacatacatagtaaaggtaaagtcaatttgaacacatgaaccgtgggttg  
acaaaatcaactgactattaataaaacactataaataatagcaataaaacataataacaagaagtctccagtcacaccacaaatgagaaaag  
aagctctacttttataaaaaagaagaaccgacataaccacacacaatattgtaattgttggtatataatgaaagaaatggctctgtgcca  
attaaactttttgaaaataaactggatccgcagcataatgaggattcaaacggaactgagaagtcaaggagatagtaagaagcgggaatta  
aatatgaggttgctatgatccaagaagaataaaaaatthtaaaacagtaaggaaaaacaaagatttatcaactttataaatagcagcatat  
tgaacccatccatattctcattgtgtttattgaactcgaccaaactcaactgattgcacatttggtacaactagtaaatctatacaaatcattca  
ttactttacttcgcaatctgtcttatggctctttaccctttgcttagcattttcctcaaacctatagaggaggtcaggtccggcactgctgttcat  
ctaccaatagttagggaggtcgggtacgaagttccttagctttattcagagaaatagtttgactctggatgctgtaatacagggactgacatc  
gcgttcgaccgtgacttcaagaatgcagacgaccatcgattatctgccttattatcacaataaaaaaatgtaccttggaggagtgaaat  
cacagcagccttagctgcaccgggtcgggtgctgaathtaagcgggtttaccaccacttaaaacataatctcaacctgcaaacacgatg  
cgaagttatgcaatcaatccttttcagaagatcattcaagagtgataataggaaggtctagtagccttcaaaaacaaataccttgccttccat  
acaccgtaacgatcacttctttagcgcacacacgtggcactctgcagctctgattgcttattgactggaatctgtgagcccttgcctgatacc  
agtaggtaaatthttctgtcttccaaagatatcacgtttcgattttcgtttccaatcggttcttcccaaggcgtagtagtaccacgtgctccga  
aactgaagaaggtaatgatgtgggggtggatthttcaagttaggtgtctttggctgttttcaatgacgacttgccttagtagcagataacatt  
ttttgtacaagcggcttttctgacttgaaggactcttgcgttgctaagagaaggcgaatthtcgggtgtagaggttggtaaaggccttggggaag  
caactgaagtttagagggttattatggtaggtcctcagatttagtagcggtagggagtttgggttggcaccgatgaagaggatgcttctaag  
tatctgtttgtaacctgtcagaccagatggcttctgtcttgcctttggttgataacgttagaagactgggtatacgtggtgaaaggttggggagta  
tacaacgtgggattagttgatggattaaagaagaagattataaccagtagcatgttcagcattgctgggtccatgccttgcactgtgcta  
aacgagaagaaccttgagttgaatgagaggagttgaaggtgaaggtcgcttagtgacaggtgaagcgaattgaaaggggcagaagaagac  
aagcgagatgcgctacgtggttcacaagaggaggattcttttctcctcagtagcggcttgcacaatggagggatgattgcccattgttag  
caactggattatctcaagatcaggagaaaactaatatgagacaaagtaggaagcacactcattcgattgaaactagcgtgattcattgttcg  
aatcaaaattagaagaggatggaacaaaagttgggtcgcaaaagctgctgtgggttgattaacacctggagacataatgtcaggactagggga  
tgcagaatagctatcaggaaaactcgggtaattttcagagagagttgttggtaggtgtcttaagctgtgaaatthtacgtaaaacttctatcgtt

ttcataagaagcgatatttagttcctttaaaacactagaatccgtattaagtaaaatctcaccagtgatttcattctccaaaaattaggagctac  
agaaccaagaccgcatTTTTtagccagctataacctctcgttagaccaattaggaagatttgaatctttcagaaagaccaagagaggagct  
tgatccataattaaaataggaagggggaagtatcactatggcaacttcagcagtcgataagtttgaatgcgctttcaatgcatcaatagtt  
ttgcatagtaggcttattgggagatgcgttggctatgtcaggcgaattagagggagaccgattagttctgcttagaatgtgagctagaatgt  
gaagaaataaatgactgttgaataatcttttgcgaattggatgactctcttctatctaaggggagaggaatggacgatcattatgaaggcta  
gacgaaacgcttctggttttgttctcgttggatcagggcgaggctggtaatatgagattctaacttggtagaggttctccaagtctgtaa  
atgtgagtgaggagctagaagaatcagtaagttccgtagtagagatagacacatctgcctgtcattacgagcattatcgtgatcagtaacctcgtc  
agtcactaattcgacatgtgaggcgggaaaaatacctcggttccttttgatcttctgcctatattcaaaatagtaatacacagctcagaatgtac  
cagatagacatcaaatatcaacagatgactcgtcactcctagaacaaacactcactagcgaaatcaagacgagtaggattgacaatcttctgc  
ttaataagacacttatgaagtgcgaaatataatagaagcgaacaccattcacttacctcccatccatcacaaattcctcgtccattttcag  
agcaggtacttattccttcaatcaatggcagttcgtcactgctttccagggaacgaatgcaaagcaaccacaaaccgttgagacgcatggtt  
gagggtgaacaagaaggatagaagttagttagtttggaggatctgaatggcgtttcgttctcaaccagatggctggtttggctttacaga  
gacgacaacgttatttaggcataagggaggcgactgaagctatgcttataagcattagaggggtgaagcaactcagtaagtaattacc  
atctaaatgttctacatcgttatgtgcaatattctttgttagtaacaatcattctgcaaaaaataattcaaaattcagactcgtataatattttgatt  
agctgtcattgtaaaaggtatcctatacattagtagcgttttgagaatgctaaaaataatcaaaatggttatacgcacaaagaagcgttatatt  
cactctgttttcattgaagttctttaccgtaaacgattcctcttttaaaaggaaattcttagaggtcagtaaaatattgatggttctcctgtcgt  
aaagcagcagaggatgatgacgaatgatagtaattcattcaaatatacttacctttttccaacttttaccttttcttcttcttccaactagc  
caacattatttataaagcagagttgaaaccgttatcgttaaatattacaacatcagcaaacgagacttaacgaggaaggacactagctccttct  
aaattacagtagctctgtgctatgtggggaaatagctatgcgggggttaacaatggtttcttctttagcaagacaagaagcgttgaataaaaa  
aaaaattacagtggaagtgaatatctgtggaacaaccgtgaaggaacaaagtcattctataataacttctggatcctaatgactacatagtagt  
ggcaagcgtcagtagaatttagaatttttgaatcgtataatattggcaaacagtggaatagcaaaagcaaatcaaatcatacagagaaaaact  
ttggaagctattagcttccactttaacttactttaactttaaaaggtaaaaccaagcggaaatcttttctatataagcgaagcatttcgcacc  
aattgctcactaatcagcttagaaaaatcaagtcattcctttaattaacaagtatcttctccttttaaaattcactattccaggaaccagtgctca  
tttgatattattttgttttaaaacactatcctccttaaaaggcaggttagtttccaagtaaagctgcaaaattagaattatcatcacttcaaaata  
aatgagatttccatgacttatttctcgtcaatatattagggaaaagaacgaaatagatgaacggcaaaattattgtagcgaatgttcaattacgt  
tgcaagagattgctaagatggcttcaactactttatcagagttctgttgcattctcttgatagtagtaccaaagtttctcacttctgttttct  
cctctgctgactgtacacaccggaagcctataaaatgtcagaaaggaattcaagctgttatcatgaacaattccaacatacttactctccag  
atctttaaattcttctccttggtaacgacatacttcaatttctccttggcttctggcgcgcatccttaattcttggatacggctcactgcttcatgc  
attagcaaaagatcctgcaaaattagcaattcatacgttgacgagcctttcgacaactactcgggacttctcagcctgtttcataacgttaacat  
ccggctcctcaaaagttgaatttctcattacaacctccaataattgttgattccagaattgtttgtgactcctaataaattagcctatttcttc  
attcatctaaaatcgtcataccatgatacgttggcgttggtttagaattggcaacttgataactttcaccttccaatgccagatgattacactg  
cgcgtctgtccttcttataacgtatcttaacgaaatgcgttataaaataccgaataattaagaacctgagaaacgttcttataatagtagt  
acaggctactgcttccagctattcaagtttctcctatttgactgaaattggcgaattctcaaatattatacttacagtaagtaaacattagata  
aacatgaacataaaaagatggacacattgagtgtttcttctcagtagaatagtaaaatatacaccgctaataagtttcttctttttttttttggc  
agtttctggttggcgttggattatagccaaaacaaccaagctagattacaactcgcgagaataaaaagatatacaaaattcttctttt  
tactctatctaaatgaaagtattacgtttaaaacaagagatatatagatttaaaattcgattattactcacgacatgtccaaacaaatgacttgatt  
agttattatcaagataaataaattcaataaaagaaggaggaattactatttttagtagaacaatttaacagttggagttatgcttgactttataa  
caactttctcacaacatcgaatcaagtacactcagcataattattatccatttaaacgtaggaaaccataatttgagatggaaaacaacgac  
gtaatagatccaaagacaataagacagtagtattatctcacagtttctgatacgtaaaatcttctcctcaaaaagtgagccataaactaaacgtca  
aaaaaattaaagtagatggtattatgtgttacttcttcttcttctgactgatgaacaagaaatccaagcaggcatcctggtttca  
cgatttgggtgaggttcaacagttggacagaattgtaagctctttgatgttaccggaacgccatttctgataagacagcttctgattgactcca  
agcttgagtaattgctcataactactgggtaaatatgaataagtaacagcaagagcgtacgttacatgagttggtccagctcataattcga  
aatcaaatcaagcagtgaaaagccattttcatcgcgcaaacgagaagcaacagtaaaataaaatgtttgaggtaaccaatgcttgggtgataac  
gcttttctcaaaaacgagttcaataagttgtgatgaatctcaaccttccacgctctcttcaaaagttaggttcttggagagcaagactaagg  
atacaattcgttaaccgagagacactgctggagaacatcaagtgataattcaaaatcggcatcaatggggcaacagactgctgttcggaaa  
acatttttgcaaaaaccatactgtagtaatactgaggggagattggattcatccagttcaggtgtagtaataatcagaagcgtcatcagatgc  
aatctctgttggcaagacagacaaaataattcagagtgataagaggttaactcttttaaaattaaccaagcatggtgagctttttctgaattg  
aggatcggggaacactgagtaaatcaggtatacagccaccaactcgtcaatggcttcttctcctcaagatgctcgtgatcattgatcctattgg

ctacattgggtcaaagtgtgctcatttaacagcttctgctgtaaaatagccaaataaagacttgaagaaccttctggttattgtgcaaatacctat  
atggctaagagccatatacggcaatcaaagcggcttggttatgctcattcaagtaagacttaacatattggacaaaagtgagccgtggc  
tacttctgatgctcgatagcatactcaaaatcatcctcaaatctcaaaagtagttttatctacagatccacgaccacggattcctttgagcgat  
ttacaataaaagcaatatactagtaagcgtccatgaatccaaatctcaatggcttaaggccggcgaacgtggcaacgcttctctgactttt  
ggctgtacctgggcaattaatgatctagctagtttctgttagattactttcatacatctcaattccatataataaatcgcataccaagagtga  
attgtttttatgtgtcgtgagatcaggcgaaggtcgtcatgaaggttattatgcaaaggatgggtggttataaaagtacgtctagtctgaatc  
agaggatccgctagacggaactgattgctccttagcagcttgcgaaaaactggctgcaaaatccctgcatggcggatggtagaagcttctaaa  
gacgaacagagatttataaccagctcctgcttctagacgaatctgataatctagagcttattaaccgaatttaattataaaaggagggttttatt  
cggtaatatcaccgagagaataatagaaattcaaaaatgaataaataagtttaagtataaacacagcgaataatgcaaatagtaggaaat  
atctacagttcttaggtctaaacaaagttctttctagctttaggttctgctgtagaaatcaataaattctcttcaacttaccctgtagta  
agactcaaaggtgtgctcctcagattctttgactcatacagaaagatacttttataatgcttaccatttctattcagacaagaacaaac  
attatttctgatttccatttctaaaatggccatataacatgatctaagaatattattattaagttttttgaaccttctctaaaacaaacgcaaac  
ctcttcaagcaattatgaacaactgctacgtggtcatatttccaattccaatgatattagaacacgtgcccaagttatcaataaaacattt  
tttaagcagcttctgagccaaactgtcaaggctagcttaacagccatacattggacttcaacacagcaacacttcaagaataaaacatcag  
gagctcatgattccggtacttctactgaataaagaaaatgatcagcaacacggcccaactgaacctgcccggcaaatctggatgtctcaaacatt  
cacgggaaacgggtacttacgaacgtcagcaacccgagcgttgccttccgtcagggccatttctagttcgataacaccggcaggaagcac  
ttttggaattgacggcatcatcacctacaatgggagataaaatgtgaatagtcggcaacagacgataagaagcagtagccacagagaaaact  
tggcatggtctggccaacacctaatacagcatgagcttcaaatcaatttctgaccgggacgtagcttagcaaccacgatgtttggattacaac  
acgaatgggagagtcagcaaacgcttcttctgctccttagggttccagacaaatcgctcgaagaacctctgaattaatgtaaagcttctt  
agggtcttctcatcagcagctgcttctttaaattcgacttttctgctgagtgagaaaaccaccgtatcgtaacagtgtagtggttctctggcc  
aggaaataggcgtgaaaccattaaacatgtcgggctgcttctatcggtaaaaggccaattctatgagacaatacttcatcttgaataatgct  
ggtgttattataataggtgaattcgaaggctaactgtagggattcagcaataaaattctacgaaatgcaattgcaatagaagcatcaactcc  
actgagttcaaaagtcattgcttctgctttaaagtaacggagacttcaagtttccgcaaatgtccaaattccaggaattgctctcatcaa  
agtaatagccaggaaagtctgtagctgacatctttcacacggctcagactggatagaactcctcctcgaacgatcaatagccattgttctt  
attcgatgggagattggttaaaggacaatataaatacaaaagtttgaagagtaagccagaatgaaggaatgaatataatgaatgaatcaataactat  
ccagtcgagtggttcataattagtggtcattgtttttaggaatgtaaaggtgatctggtaaattctctcgtaaaattatttgcttatatatt  
tatctgcatcctatacggctagctatatttcaacttcttttcaaaaacttactgtatagacttctcaagcacattgaactgtatgagtggc  
atgctgccattcgttctcatggttgacaatcagcgcgcaaaataatcggcgccatgcttatttctgagctttaaacttctgttgtaattcattg  
ttccttctttagattcattcacaaggtgaaactgttctgtttagtattacctactattatacagacaccaaactaataccatagataccaa  
tatgattatcctaaaaggtaataatagctatcgtacttgaaaacaaagcttccactacatgaagaatgacttatataaacaataaccag  
tagtattcatttagaagattcactcggctacttatttataactaaagaataatcaacgaaatctcctgaaagatagaggcatagaaggaactcc  
attaatagatataagtggtatgttggaatgtcattggaaagtaccgtccaactttgaaagagcaaatcaattacatcttataatcagttaga  
gaaataaaaatcatatctctgagaaaattcaagcacttgggggtgaagttagagattgcaactagaagaatataaggagcaaatcaaggatg  
cgattgaacagagcaaaagcgaagcaaacactgaatccatctgatctcctgcttctattatctcaaagattgatgattcatggtacggttggg  
tttagaagaatctcaaaaggccgcttctgctttagtctgctggcgtcaaggcaccaggctgggtcagaagatccaaaaggatgcttga  
cattgggttacctggacatgaaagcttattgctcacaagcttgaattcaaaagactgagcatctgctcagaagcatatcctatgaggaa  
acagtcgactagatgtttatggtatattaggtgtccgatgcaataaagacgcaacacttctcttttaagaaaagcaacttggaaacca  
agtgaacacgtgttcttctgaacagggaaatgcttctgttagacatggaagggcggatcctcctggagtccgaatgtactcttggccaggca  
cccaatggaaatgggtggagttatgaggctctacgagaatcaggcgcgctacgacatgaaagaatctggaatttccatataactgcttacag  
cgtagacaatgttctgcttggcagtagatcctttttatcggtatggtacaagaaaagagtaccaagtggtctgaaagttgtagaaaagaa  
gttagtagaagaaaagttggcttagttgtctcaaacgcacatccatcggttggtaattctgaaatttctgaagaggctccaagcaac  
agaaaacagtgagcggaaaaactgtttacgactcgtgctgcaaatatgcctatcactatttcttgggattttagaacatagctctcataata  
ctagaagcttctgttcaactgtttaaagaatacaaaacttgacattaccataaccagtttacaagccatcttctcaaatggatacaa  
acttgaatgtttattttagcttcttgaacaaatctcattgagaaatcggtgtctacaagtttccgggaaacatcatttagcttggaaaa  
ctcactgaatgcaaccaacgataatcaaaatacatgctgagacatctacgcttggcaaaaaatggatttcaagaatggcggaaatttag  
aacagggcagattgccctttgtgctccatcctcagcctcctaggtgagctctagaatggatccaaggaaagcacatacgtgagcatcctttata  
ttaatatattaattcccacttcttcaagaccttgttctattcattctttttagaaaaccaacctttaccgagaatagtgagtcgggtcattg

tcaattccaaccacacttcgatacaccactgtttccgtttccaagtggttttccatataattcaaaatagatttctcctatgagacgtagta  
ttcggtaactagtagatcccgtcttcttgcacgtttcagccgaaacgggtgtattcgttgcatccgagtccttaaataagaatccgaaaagccc  
aaagaggacgtttggctcgtgtcttcaaagatcctgctgaaaaatcgtggaaagatcttacagctcctcaaaaagcctatcgacttctgcaaac  
tttgaaaattgtcaattatcgtcttccggaggcggtgtgtttggcttaatcgtctatgctttggttactagtctttggcgggagaagcacactacggt  
gatgaggcattcgattactaagaagtaatgcagaatgtcaatattgttttgggaagaaatgaaagctataggcgcagctagtaccattaag  
acgcactcatggtattttaacgagcagagttgggaccataaaggattgaacacttggcatatacaatttacttgattggaaatggacataaggg  
ccatgttttggaaagactcgcgaataactgaaaggattacacctgggaataactgtacgttgacgtacagattatgaaatatttctttttgac  
aaaacaagatctataaagcgcagaacaagaatctgggtctttggggaagtctcaaaaacatcagctggggaataagcgaagctaaaaaa  
cgagacaagtctcgttttttggctaaagggttactgaagcacatttctactcaatagatcctctttatgttggtaacatttgcattcaaggat  
gcgcaagcaaatatggctttttggaaaaatgatggctttaaactcttttattagcgttttgcctagaagtcgacaaataggactctttaa  
aaaagttaatgaaataaaagttatgtttactgatcatgcaatgaaatggcatggaagtaggacttttagcttatcggggatttctactatt  
gaagcgaattttgcagcgtccataagacaattcaatataggattcattaaaagcaaatgcgcatgaacttctattttctgaatatgtaaag  
aattgctttgtaaagattaaactaagctttttcgcagacaatttatcaaatcgaacaaataaacaatcttcagtcggttcattctgactcta  
tattctaagcaagcaagaaaacttcttaaggagaatgctttagaagggttatctgttatattgataaaggcaccttgtttcgtaccaaaaggg  
ccgtgctcaagcaactatactttgcagcagccataaaaccagatcaatttaaattcgcactctagataataattcctctccattcacattaatgtg  
gtatttcccaaatgaaatcgtagagaaaactgatgaatgcggcgttcttgccttcaacatacacatctcatcagtaaagcagatatttca  
tgcaacctttcaatggatgctttggggcagattattctgctagtggaccaacgaagcaagtttttagcatttcttctcgtttacataatcatgagcct  
tactgtagaatgtgtaagtaacataaagcaatcaaatggtaactactactatattggccagttgcatcaatggcagcatgcttgaggatctttt  
ttgcgccgtccgggtgatattggaagataggtggtaacattatagacttttctcttacagcaatccagcaatcttcttagattatgcttttcaatt  
cttcttagtaactgaaaagggtgatccactcccttatctctgttagcttcaatcatcaatgcaacgcgacaacgaaaccacttacagacaga  
ttttcaccatttctaccaattcatccatttttctgagtgcatccaggtcattctttgttttttctgcttttctcttcttttcttaagccagca  
cgctcaggttcttcttagtagactctcgttggaaaatagggacttaagaagaagacatttttataagaaccaatggatttgcaaccaag  
ttataatttctatcaacctctatagttgcaaaaaatgtaaaggacgaaaaatgtgctgaccaaattggcattttacattcattctgtttacgtta  
cctagaatcaagtcgttactttgttacgtaataaagcaatgtttacaggagaaacaaaaatgggcaagtttaaaggaaaactttgagctttctt  
gaagctgatgtacgtttgctgttgcgaggctcgagaaggtacttggtaggtgacggctgatctttttttcgcaaaaaaacgagatctttagcata  
tgtcataaacatctaattgtgcaataaaacaaaacttccgatctacaccgattgtcacattgtgatgatggatgctatactccaataactttt  
ggctgggttttggtaaacaccgttacaatgaataggaatgctcgcctttttatttcaatatctcagagtaaaccttttggactcaatttactgtc  
tcattattagatttcaagaacagatctgaataatgcgtagtgtacattaaaggaaaagaacaaactaaacaatttattgcaaaaaaaaggta  
cattaaagatgggtaggtgcatccttataataacataatgttatggtttccatcgaagagagaataaagaatccatacgcagatgaacataaa  
ataaaaaatcattgactgaacgttcataaccagcatttttggtaacatatataggacatgttgaacaaaataaaccattaaaaacgacgaaaaa  
aaaaaaagtatatatagacgagtagaaaaaataaaacaaaaataggttatatcacaagtgtaactggctggttgatccgattgtccggc  
atattgaataaccgaatcaatgtcatctgtcgtgcttctttaaagaacttatcaaaatcaaatcattcaacaaagctgcatcaaggtcag  
tagatccaggagcatccaatacaggaacatttggagggttttccatattattccagaacctggtatagaagatttttttgcggcttcttctgtg  
ctagaaatatttccctgaaattgttggcattttgcatactcacaccgttatcttgaaaaatattgttttcatcaggggatcaactgaaggaaacagc  
agggaccgactgtaattctgatcgtatccttttgaaccgattacaataggagaatctgtgtaggctgattagactgacgccgtcttttctgtt  
ttattcctgttggcattcctatgtacatgtatattagtttttcttcatgaaagaatttttatcgaatttacttaccgggtacggagttggctacc  
agagcgactcaatgcgctattaatatctggagaatgcattgcggaatctgcaggacttgcgacaagcccgtataattatagacatattttttca  
gaacaatatggggacgctcgttctgacgcaataggacgatttattgctccatcagatccgcatcagagctagtataacgttttcagaagcc  
gtattttcaagttgttttcttattgttttggtaaacattgaaggcagctccggaatttatctggatgggcaggaaagcttctgttttctggtgatg  
tagattgatacatcgggtgctcttcttctgacgaaccataagtaaacgttttttctgttggtaagcaacttcagttcttccatagttttta  
gctggatttaccattattaggtgctgaaggagcattcattccgtagagcattggctgtccataaggaggtggtggttgaatccatactgatttgggt  
gggataccggtactctaggacgttggaaagtaacctgggatttatcaggagcattctgtggcaaggaggatttgaataagcggcataaattgt  
ctttgatggatgttccattgtttgaaaattcacttcatggagcagcgggtgtgcagaatccaggaaccataaagtttctggatttgcataaag  
agaatcaaatgcagctggggggtgaggaatagaataggcgtcagcggctggttaactctctgaccaggtatggaagcaccgactgcagctgcc  
gcattaggattagcgtcatttccatgcgtttgataatttcaaatcaggagcagcgtttttgttagatgggaaagaatcttgaggaaacag  
gtccataactggcggcgttttctgattcgggattagatgctggagtaggaaaaacaggaggaatgggtgtgtttggattctcaggttctgctt  
ttgtgattgaattggcgataatgtagctgtttagctgttgaagctggcagcagtaggagggaagtttctctaccttgattattcattacagcct  
gacgcatcagctgctgacgatttctatccataagcattccgtttccatggggcgtcctggatgaatcaaaatgggtgaacaggatctcattgtacat



ctggggagccgtgggaacctgatacatgttgctcgggggtcccgattgcattaaattctttgtaacaattgcatattcatgtaagacttcttctca  
aattgttaatatgagacatgtaagccatggcaggctctgaaccatttctctgagcactgtaaatgtcccaaaaaacgttccaccattcaatca  
aaaaaccactgctggagtcaattggcaaaactggagggtggaggatcttctctatatctgtatgactaggaactgttttagtagattcagagt  
tttggtgctcgttcaaatttgggctctctcgttaacgtttgcccgggaagaagctgtttgcttaccagaagtgcggaattttactaaaaggctc  
acaagcgtttgaacttgcgcttctgtccaaacgcttgctgcttccaatagttttctttacgagataatcatagatatacagattcagcaggga  
ttgagttgctctatcggataaattcgtatgttcatggttattagaatcattgattgcccctgactcagctgagctagattttcagccggttctgcatg  
aactgggggtggtgttcagagagttgaagcaccacaccagctgctctggaggacacagcaaaagtagttacattgctaagaaagctaaagatga  
aataaacaatattcgaatagaaatacttttattatatttctactgtctaaacgctaccctcatataaaagggcctttacggttcatatac  
atcaagcaacggcctttcaacagagattgctcttgaattcattgtcattgttttgactttttttcacgtaatagaattctgttctataaaggt  
ggtataattccaatgttctgactttcacaacgaatgctaactgtttcgttcacacataaactatatgcaaaactaaagttatacacttttaaatga  
aatgaagttaactactcttttcatatgtttccaacgggtgaatagcaaaataatcaaggaattcaactttgtacacattcgttctatcacattggtg  
atcacgcacatgttagctgcgatagaaaagagctcattctatgtatcatttctattttctctctcacatgcttgcactctgaaactaa  
attcatttctattttacttacgaactctcttagaaggcactaaatgctttccaagctctacataccgtaaaacatacttcaagccactttgc  
aggtagctacagagctcaatcagctatacggaaatcgaagagagtagataatttaatacaatattagtagataaaaacaataaatggtta  
tttcagactgtaggcaagtttttaagatttcaagccaattttcaaaaaaaactttctatattctgaacagctcaatctcagatggttttgacc  
gaacaggttactgtcaatgtttgtgaaggtgtgcatacaactaacagatttgaatagaataaccactttgctgtaaaataaattttaaaagaa  
ttttgtaaaaacatacttaaatgaatgccaatactctagaaaatagctctgggtttctgactagctgtttacggttataccttttagctattactgt  
atagaagggcttattaccgtgaaacaaaatcactggaatctattcaaaaaatctactttgcaatataataaattgataatttctgtcttaaaat  
acttttagcatctttggctgttttctagttttatacgttctgtcatttctaaatagtaatggataaacgaaaagaaccggaagttcctcagaatgga  
catgtcgtactatcaaaagtgaatgaatgttttctgacaaaaatacagggtgaaacgacctcgtgtggaagatgtaattttagcctcagatg  
aagatgttgatctagacctctgacttaatggcccctaatttcaaatgataggacacacttcagaagcttagttccagatttgatctctctggt  
tcgaaatttgcgtctggagggatggatcgtcagatacgtatgtttgatgcctttcgtttacctaactgctgttggttaacatatttttcaaaatt  
agtcttatggaatgtatttggagaggtcagtaattttggtatctgtctggttcaaaaggtgcattactgatttacaatggagcagagatggtgaa  
gtttatacaatgcttctgatgccaatttatattcctggaatactaattctggaaaaaaaataagaaaatacaaaaggccatgctggcgtggtta  
atgctctagatgtattacgggtcgttctgaactgtaacttcagtaagcagatatttacaatgaaggttaagttgctttctttcgggtcaacatgt  
atactaataaccataatthaagatttgggattcccgtctaaagggtgtatacaaacatagaaagaaaataccccttacagctgttgccatttct  
cagcagggtactactgtatacacaggaggaatagaaggtgtcattaaagcttgggatttaaggacaaacgaagtcatctatactttgaaagaac  
ataatgatatacaacagatttctttgtctaaagatggttccactttattatccaattccatggacaatacaggtaaatctttcccgaagtaata  
gccagcttaaaataactaacctctcttagtacaacctttgacgttaaacctttgctccttcaaaaggcatttgaatgttttaatggggccgtac  
atggattagagcataaccttttaggagcggcatggagtggtgattcccgttttagttgctgcaggtagcttaatcgaatacctatgtctggtcatc  
ctctccggtgaactaaaataccaattacctggtcatgaaggtgtgttaatcacgttgattttcatccaactcaaaacatcatctttcatgttctt  
tgacaaaacaatgtttcttgagaacttagttagaactaataaaattgtctttgatgcatctcaatctgcctatagttggacctcatccttaccata  
ctcactagtctaactgcatcttacgctgcagcagagaggacttgaggtttagcagccagcatgagtaatagtttatggtaataatttttatattc  
tcaaaatttaacaaaagcatttaggctgaataatctcgaagattggatggatgaagagcaagtaaagttgcttcaataatcgcgatctccg  
ttacttactaccaagacagtgatctcgtgcttacttagaacatgtaaagttgagtttcttcagcgggaagcagctgtaatgattaatcattta  
tccggacaaaagaccatttctgtagccctattctattagacgtattggcagattgggaaaaaccgaattattatagctttttatacaaacattg  
atcctgatgttactgaaaatgaaataaacagctatttcagtcgtacggttgcgtctctgcgagcttacgctgcatggattcatcatcaacgag  
tttagcattcgtatggcttggcttttagaagaagctgaaagggcacatgttgaaatgcaaggagcgttgtgtatcaagcgtcctattctgtact  
ctattcgtatgatacaaaatcctatttccctggtttttatggctcccacaactgtaaaccagtttacggaccagaataaactgccattt  
ttatttcaggcttttctcctcaataaaatccgaaacccttcgatcttattttgaacatcttgagaagtgctacatactcaagatttagtggtttgc  
taaaatcatatttgcagagacatagcggcaacgtgcaatcaatgaataactttccaatcctcggtcaagaattcaaaatttctggtc  
tcggcctcctctatgagcttcttctcggcgaagtaacatattggcctgattgcatgctccatttatccttcttggggtactatccctactcat  
aacttttctcctttacttctgaaatcgatacgcagcaaaaagtttaaatcaactcaccatccacctttactccaccaggccttaaaaatggaac  
ggattatccttatctccaatcccactactttattgaatgacaaatattctgcagagaaggaagctgtggacagctgacttgaagccgactcctc  
ccgttaattccagtcattttttcaaaaatacagagtaataacgatgtgtgaaacgatagagcagcgcctaataaattagatttatgactgt  
gacattgaaccacaaatgggtgatgactaaaagttttctttcaagtttacgaataagcgttagcctcatcttctaattttcttgttttgaac  
aatctatcttctcattatgttcttgggaatatgatcttccgggttcttgcacattgaagaattgattgggtaattctgaaaatgttgagatgag  
cctagatcagatttttactctgtaactactcgggttagtctaattaagccgactcacctatatgaaaattagttgtgaataaattatcacg

gtttttttattgctaattttgtgttatttagactttcattactgataaaaatcatgcagcctttgcttgcgaagtattcgatttattgatacagattct  
aagactatatcatttagcagctagaccttttgttatagcgtcggcatatatgcatgtatataaaaggaaatctaaaaaatccgcctaataccta  
aaaacatgaataacaaagtagctgttagcactatcttctgaaacaggcaagattgcataaatagacggtagccgcctataaaaaccgttatcatta  
ttttcaaaaattctttgaaaatataaaactcattttaatcattcaatcaccaaagaaagcaagatattctttctccacaaagactgattgaaac  
gtcgattattaacatcgccggaaaaagggccaacaatttttagttatgaatcaaactaccacagccttaacaaactctagatagtaaaggt  
gacatagatgttataaaagtataaggtttttcacactagaggatgtgagacgtattagaagacgttaaagcactttgtcaaggctcctttgggat  
aaactcatcaactgtcttgacttcattaagaatttaccttaattaacagagctattatttgcgaattccataaccactgagctgaaattcacatctat  
actgaataaatcaccagaagccaaataggacagtttaaggaaataaattttcaataagatttttaattattatccatataatgattgtaataa  
aaaaaatagcaccttatacgcagctattgcatcctgtactaggttctttatcggttagcttaccatcgtaacttcagcctgtttctttgaaa  
gtaccgctcaagttatggagatacatatcattgcatagcgttctgtgatagcctgtgggatgtgaataaccattagaatgacgttgattcgct  
ttaggttggcctttgaagccagcgaatcctttagccataaatttatgtggtatcaatgtcaaactcctctaaagctatggcatcatctatcatat  
gtacctcataatccgtctttcacttatccaatttgaagattttctaagcggctataactccagaaatacctttccaattttatcttcgactgacct  
aagggatctccaggcacaatcaactgagatactacagccgactgtgaaaaataaagagtccttctcttaagtaaaataagcccaact  
aaagtgaaggccgttattataatacctttaatgatgggcttcaataatgggataccgcgctgatggataatccggcatttttaaccaggaagat  
gcggaactcaagcaataacacatgctgaaactctgactgggtgacgctatggttaggacggtatataagcataagattttctaggtattccaat  
tctaaatgtcctcacttccatgagaagcatcagcactgctttaaactcgatttccattcatctaatctgatgtagctgttgtgaaatccct  
tttaggagtaacatttgcttgatagttcattaaggatcagaggtaagtcgtcgaatgaataacatgcagccttaattcgagattccagcc  
atgtcatttaattcagcgaagacgtatttctctcaactcggaaatcgaagaaaacatctgtacatctatgcttgagctcactgagaccaacagg  
tcttctgtagtggaagctaataatctatctaaagcgtaaaaggacaaaaacatcgctcattaatccgtaagactacttggaaatcagaatt  
cctatatgtaactcgcgatgaagaccaagagcaatagcaatcgccaaccttctaataatgatccataagattccaatcccggatagactcaa  
gcaatgaatattccatgtaaagcagctcagcactatattcaaaactataaggcctttgtgattttgaaaagaattgaattgccttcaaaaat  
attcgaaggaatccttacctaaaagtgaagatccaatcgctaaacacatatttgcctctgataattggtatgcagagtttgcagatccattctcata  
aactttataaataaatcagcctaattgtttcaggttatgattgggaatgatacgaagtggtgaatcactgctattaataatagaatgattgaaatcac  
ggcagggaaacagataaagtttgcgtgaaggatatactgtcaaaaatagggttaaacagcctttctttgtaaaaaagaagatgttacctg  
aagccgctctttcgttcacgcgagaggcaatcagcaatcacacttctgaactcggccaatgtagtattttgaggcaaacagtttcagga  
aagcttgattctgtaaatcaatgaaagcggcaaggaagctcaaaatcaatgcatgcaagtagctcgtgaggtcttttcagtaagtaaga  
tgatatcagttcagattcgtcgcactcagagttagaagtgacgaaggcagggtaggaatagtaacagaggcacctgttggtaaagcagaagca  
ttaattcccgtcttgataaaatatttttaaccattggactctgcaggctaaattataggaatcttgttcggtcattaaaaatccatcaggcatgat  
gcactcactaccagcttttagacagctactgcatcttggctgcttagcatcacatttctgcttcttcatgacaccgctgcatgctcgaagtgctct  
tctgcttactggctttgacgttgagtggttcaattgaaaagcaaaatcagactttgggctgaagcttacgcgacttgacgcgttattttcaaatt  
cttcagtgctttgggatgttgaaggcaattgtccttgggtgctatgagtttctgcatgggctatgcaggcgttcaacaaacacaaacacaactcca  
aaaagggttgaagcttataaaaaatgattagaagcgaactatttttcaaacgtcaaagttcgattaagaacattcgacgttatttttgatta  
gttatagtaatatgaaatgtgagtgctgaaaagagaatcaggttataaatcacagaaattattctttacttacagttgttaacaaaatgaaataa  
attcattgcgttccaaatgagatatccaagaaaatcgcctgttgtgtttcacataaaatgaatgacaatctttcacctgtcccctttcattatgtg  
tttattgaattgtataaacggatagaaaatattcagctttgttaatacatctgagagcatgtttcatttcagactaaagagaaggacatggaatg  
attgcaaaaggaggtgtcaactcaatttcgataaaaaggttgaagtattgaattttctgactccaatttcaatgttttagtacggaatttctt  
cgcgtacagttgtaataatcgacagcacatagcaagacgatggtaccttagcattgatctgttagagaaagtaaaatgttatcgagattacc  
aattttgaaataataacagatataattgtattatgattacctaagtaagacaaaataaacagtgaaatcccaatttatcaatataattaac  
cattactattcattttcaattctattgatactttctacgatataaccagggtgcttaagtaagttggatctctgtttcaagaacgcgttatttaataa  
catataacgaaagtctaccaccatcggtcaagccgaatgtatgaggcagagcagatattttttgagaggaatgaggagtaactaatttaca  
tttacggagattataggaatgaaatctcaagttctatataactgcgttactcaaatcatcttatgaaaagagtaaaattcacttcaataacacat  
gcgagattattagatttaagattttataaaatgaaatattagaaaatagggtttatgggacaaaatttcacataaaaaatcatttcggatta  
tccggtgaacggattagggggacaaacccaacgtaaaagtatttcgggcacactatttgttcttagtttctgttagtgatatacgaaggcct  
aatcgacaattttgattgtgatcggatcatcgaataaagtcaattccaactttatcaatctatgaaggatgcaaaataaaaatattatgtt  
gtttttgttactttataatattgtatatcaatgattgtttatccattcctgtatcattcactaccgaaagtacaaacatcctcattgcctttttat  
gtttccttaataactcgtacagtcattaggtgggcacatcgaagaaagattgcatgttcagctctttgctttaaagactatgaccaagaagatac  
gttctatcctgagaataaataatgcaacctgaaattcacgacattcaccgttactcatagttactgacaaagaaaaaatgggctgttctggga  
atcgaaccaggaccacatcacctaagatggtatcatacactagaccaaaccggcgcgctctgatcacatcgtaaactttataactaattttat

caaggcatgttgctcctctatccttaaatgaataatacgtgcgattggatgcaatctagcgacatgtgctttgagtgattttcttttggtaacaa  
aaaattatattataggtaatgcattaaacattcaaaaaaggctcgatagcacagttggtagtgcgatgactgtaatcatgaggctgagggtt  
cgagtcctctctgaccgtttcttttcttaattccaaaacatgtaggcggaatacaaaaatgttactgttttagaatgtgtacaaggatcga  
aatgtatatagacggatgaaacacacagcaaaagacagttgaaagtggttaatatatgtatactaagctgcttcaatagacgaaggtctttt  
ccttttttctatcaactcgtgacgtttctgaaaaacttgcaaaagtctcctacgtaaaaacacattgaataaaagaacaattaccttattgaa  
actaggattcagcgtctcctcattggtatcggttggaaacgagagctcacctataggaggcaacaagcattgctatcatcatcggaagccgat  
aatggatagtataaatgtaaaatcaattaaggccgaatattaagcaaatctatgttgggtcaagagagctcatctggataagacagtccg  
aagcgacaacatggatgcttagttattgttggccaaaacatgagagtgtgttccagacgaaaaataagaaatcataagcaaaaagtcaaag  
taacctaaagcgaatagacatctcagatcagtaactgttgattcctatactttcaactcctctgtttctttcagatcgtggacttatttatcct  
tgagttcctaatactctttcttcttccggccacattatctttatggctttctgtgattagtagtaccagataggtaaaaatgattgacagtttctttg  
tctataagcattcgttaaaggataattcctttgaaattatggagaataccaacacatccgataatataacctcggttctgttagggcacagcaa  
aggtaagttcgatacctgaagtaaaacaaagctattttactttcttctgacttttctatctatattcggtcaagcgtttttctataattg  
ttttctttattttttgatgcatcgtatcctgttctgaaagtgaattgggttatcgcttctcctgagatcttgagattacctcaaaaacaac  
cgtaagctctgttggattaagccaactatcttgcgctgaaaaactgataatactatcaagaatgaaagtgaattatgagattacagagacga  
caagaaacatttaaaatgatgaaacccaactagttgaaagcatataattccttattctcatcatttaattgatttaggggtaactttgagat  
ctttgttattctattgttcttgattgaagcatttactgttatgaactcattgtcttccctcaatacactgaaacacaggtgattcctattcaa  
aatctaactgtctcacgaaaatgtagccgttgacgaaaagaaaactgctgttctgtgatgaagattctttaccttctgtcgggtgaaatcgacat  
agtcagcaaaaaggtaggttctcgttttctgacggtttctgctcgtgatgacagataactccgaaatggccttcagcgcaaaactc  
aaatctcgtcatatccaaatgatcgtataggggtgccattggcactggcttctgggttgaagcgggaagtcttttagttacaggaggtgctgctt  
ctgttttaattaactacatctaactcggtcaatgggtttttaccgtctataacctcggcgagttatgctctcctcctactcgggtggttacatt  
acatatgctactcgttcttattgatgaacttgggggttgcattgagttggaattatgcttaggttcttagcatccattccactagaactaccaca  
ggcacaatgttgattcgttactggacaaactcaatgcggttatatggatcactatcttattgcttctcatttttccaacatttttagttcata  
tctatggagaactgaatttctcatgtctagcataaaaatggcgccatgtgtggcttcatcattcttggataatcatcgattcgggtggttctca  
cggattatagaggctaccttggaaactcacgtatttcgagaaaacgcgttccggaatgggttcaagggttctgttctgttactttagctgctttt  
cttttccgggtactgaatatgtaggagttgctgctgctgaaactgataccagccaaggcttccctaaggctgtgctgcaaaactttttccgcatc  
accatttttatactttcttttcttttctttaggctgctaatcagtggtgctgacctcgcttaacttctacagtgaggatggatccagctcttctg  
tttagccattaaagatgcaaacattaaagctttacctctatcttaaactctgttattttaattctgttatttcttctgcaatgcccattctatgca  
ggaagccgtgctattcactctttaggttgaatggtttggccctaaatgtttctcctgggtagacctttctggctgctataattgctcttcttattct  
ctttgttttatgttttctggttttggtagaaaacaggtaaaagtaccactgtttcaattggtttatgtctatttctggcttggcaccttattacctg  
gggaagtacaacctcgctatattcgtaccgttctgctatgaaataccaacagcgaagcttaaggaaatgggttctgctctcttttggattt  
atgccgcttggtatgcttccgcttatttctgtgataactatagccgaattctatgtctcggtaagccagttgggtgaaaatctaccgctagtga  
tttttatgaactattatcagctattattttggttttcttattgctcataaactatttacaggactccaatcattacctcttataatgtgcattg  
aaaccgactttgccgtataatgcatcagagaaagaacagaaaaaccagcgacaactagtcttccgcaatagcaaaagaagatgtaaac  
cttttttaataatattcttcccttgatgattctgtctacgtcttttcttctgtcatgcctcaatgcttctcttttttttggcgctttaaaccg  
aatgatttatgcttttctgttctgcttatttctttaaataatagcgtcacgtttaccgttagttaagttatagtaaagagtttaacgtggaata  
gattatttataagtttacagataattcagctgaattataataagaagtaaaacactcactatgaggactattaatgaaaaacaaaagataataa  
aactaacgaagcacttgctttagcttctcctcaactgaatgtctgtctgtatctccaattgctacttgctgcttgtttacaaaacaaaggata  
gttaactcctgatcatcgtaattcgatttaacaaaacaaatgacaattctcattaatagataacctttcataatattctgtgtgtttcaaatgag  
ttctaacagccgtagttcatctgaagcaccgtctgagcaaacacgattactggaaagtccgagcaaaatctagccaaagtatgcaaattta  
atcattttttgtaactattgccgtaggatattttatgctataatcaatttactttcattttactattctaatacagggctcttctctggttactactgaat  
cacagatagtttctggggaatctatagcatatcactaatatcttactgtacttcaatcgtaagtaataattagaggagctttcaagaaag  
cggctcttctgtgtaactaaactacaatatcaggactgacgaagaatgccgttttattcgtaaaactggatattaggatgctttagacaatt  
atatttttctatattataacctatctcaagaacatagcgtatcttaaacctccaaacgccagtggaaccttcaagatggatgtggattatc  
atcggtttagtttctgtggatcattgaatcacagcgtatgaagaacacaaaatccactaaaataaagactaataaactagattgcataa  
aaaactcaatgatattttgggtgctgtcttgatgacaataacctatgtggttattctatgtcccattccgttctctcgcataatgggattttgtt  
cctttaaaatgggtgatcttctcgaatttcttctcatatcttaatgacctcagtgctatcattgtatcaaacctgtaagaattcgactgttt  
acacttactgatatttagcttcttccgaaatggctctatattggaagaaaagattattgtagcttctttaaagtcatttttacttcttgcgtagg  
ggctctcgtccttctcagcatttacgaaacatatacagggaagcgataaactacaaaaggattctggatgccatcgtcgcactgcagatgc

tttagcaatcttagaaacgagtaagaacgaacattcgttattttatttacttttttgaatctaacattcgtagtgtacccgggagctctataccg  
aatatactgtggcattaaagatcccccttgggaattctaaaccacggatgaggaacagatggaagaagtttagccttcttcacaccttccctgag  
atgtccaaataggatcgaataatgatcacaagagcttttgataactgctgattcatttgatcatgcttatacgaatgatttactatgatagac  
cttgacgaccttcagcgttctgatataatatttaggaaaaataaagaaaaagaaaaaaaggatgaagccattttatctgctgtttg  
atgaaaattctagtcaattaatttggcgttcttaattcacacactcaaattctaaatccgtttcaaagcaatcacagttcttccatatttctcat  
ataaaatattattaggtgcatagaatctgtatttcagagaatatgtcccctacaagataactcaataactaacatcttttcgttgggttttttttgg  
atztatcatcaccgttgttagttttcatcaggtgaatcgttgatgtccctcgtttgggaaggaagcccttcgaaaatgtagtaacaaatacat  
cacttctcatgacgtgaactcatctgatataagataaaataaaacagacctgaaggaaattaaagaatccaaaagcaatgcatg  
tctggagcttcggaaaatattacctaataaaatctacatcaaaaggtagagagatcagaaaaaatcccaggttagctgaatggatgtcacgca  
acggctcgttttaggcacgcatgatgaaacagttgcaactcaaaggcgaaccacgacgttttataactaaaaatccgtataagattgggaaa  
attgagcatctagcgttaacggaccttacggtacgattcctgtaagagtataccatgcttcaagcctggtcctgctcatggagcagctttgat  
atgtcatggaggaggcttcaagtaggatcaattgatcaattcgataatgctatgagaatttttctgaagttagtggttccaagtgtacattgtc  
gattaccgtcttaccagaataccaatggcctactcaataactgaaggtgaatttgtttagatggattttgaaaacgcaaaaaatagga  
gtagacgaaaatcgtattgcattaggtggcattcagccggaggaaacatgacttgcagatcaccagaagcttctgtagaaggtggaccga  
aactggcattacagatacctatttaccagagaccaagatggcgttcgataactaaggcagcagtggaataagtaggcaactatgtcgagac  
agcaggtttattccaatttctaggaacttactccccctcggttgattatagtcaaccgtatgtgacgcttgaacgcaaggactttagtaatt  
tacctcgagccctgtttggaatgatggttttgacatgttgcgtgatgtggccatgagtagctcgcaaattggcggctgctggaacgatctgtt  
tacattacaacgctgatcttactcatgggttcattcaaatggccccattctcaagcagatgtctagaagctacagaggaaattgcttattacatag  
gagagctcctcaagcatcatgagagatttttataatgaataatgatttttttataatctcaatgtattttctgtaaacattgttactatcac  
ggaattatagaaagtaggaatagaattgagaatatactgaggaacgaaatatttgcctgctatgtttgcgttaaattggaatttttagttagtagca  
atgatccaatatacctacgtgatctctcgtactagcagcatatttataaaaacaaagattcatttggaaacaattttgttaacatttttt  
tgccctagtcggtcttcagtctatgagtttatctccactgtttgttctcaattcaataatgtcattatgctatacatccacaaaattatgttt  
tctagtgagttatataattttttataacttctgctgcaaatatgtagacaatgatttctgattgaagctataaaaataaacaacaaaaata  
aacttttcaattaggatactaaaaagaaggtaggccaggagtgagcctttttctcataatcgtcataaatcgtttgtcggaacatgcgaaaag  
caataaaaggaaaatgcacaagtaccacaaggacttttagtggcttcatgaagtctacataattttggatttctctactgcccagcacaat  
agagctttgttcatgaatcgtttgggagtcfaatcaagaattcttccacttgcattgacagccattccattggcttgttcgataacattgccat  
tgggaaacattcatatacaaacgaagcttgcctttctcagaaacagggaagcaaaaataccaccgtaaagcatagtagcagtgacatca  
gcaaccattgatccaatgtacctagcagcatagggttaccaccttctggagctacttttagacatgaatgaagctgcaattttagaggccag  
ttcaaagtgtttcctcattgattgagtagatgttttgtatattggcattgacaagttcgtatgggttaaatgaattcaccgagatttgtgtc  
tagaaaccattaactttatgtcctgtagtcaacattaagtgccgatgagcagcagcagcagcagcagcagcagcagcagcagcagcagcagc  
acacatctcaagcagcggactaccaggacgaattttgtagatgcaaaagattgtaccaactaacaccagcatcgatattcgaagaacca  
tcaataggatcacaagtaatagcataggaaccgctgtgtcaacaagaatagcctcttctccttcaactaacatgactctaatgcagccattg  
gatttcatggcctcgataaatatgtcgttgagatactatctaatgtctttgttgcaccagtagaattaataacaccagaaagaccgattaaatt  
gaccaattcggcttcaaatgatttgaatgaattgaaagcaattgaagactattgagtaagagagacaactcaccgctagcttcttgaat  
gatactagttccctgtcatggtatttctgttattttcttcttgaagaatgaaactagagagtgtagaataatcagtcgctgctgctgcaac  
ttcttctcattttgataattttctgctcagcaagagtataatcgatctcactatggaattgcaacaatgcaaaagctgtttttgttaata  
agagaatgaaaagatattcgtaaagtagaccataaaacgttggggaattggtccaattataagctaaaattctgatttcatgcaataaaca  
tcatgaaagataaacctcacctcccgaacatcaaccttccagctccctcaatgggtgcaaatccttttagctcagcataagtgagctaaggatg  
atgatttttgatgggatacagatgtttttattggtaggccaagcctagattggggcgctataattttatgctcaatgattagactcaacacatta  
acctaaaccttttcaaccctaaaaggacacgttgatcttcatcaactacgtatcgccgattgtaaagaataatcttctttatttacagaaaa  
agtaatgattctgtctcaattatcataaaccttctctgtgtttttcttttctataatgtcaatttctagttattcttccaaattcataattgccat  
tcaactatgaactcatgtaataaactgaagaatttaggttgcattatgtagtgcagattaaagtggcgttatttaattaaggtttccgc  
taaccgtaattgaaattcgaagtattttgtcatggcagatattcactacgtataattatgtattcaagtggaattaataactacagttgaataatt  
gcgtacgttaattggactatgttactaagtatagaagataaccaccgagttcgagagtaggagcagcagcagaacgtattaccatactgccaac  
accggtagaatcaatgaaggcaatcttgaatatccatctggcaagccatggaattaccgcaacgacgacctaccgctaaggatgtaaatga  
cactaggaaggaagccagagagctcgataaattgagtaagaacaaggtgagcaaaaggagttaaaccgacactgtctcaagataaatgtg  
ttaccacagacaatagctgaagcaattcctaagaaaacataaggaaggggaagtccaagggataatttgaccacagaaccaaataagcttcat  
gacgagataagcaaacgagaaaatcaaacatagtttgaccttaattcattatcggccaaccacatagtaacggaagcaatcagaagt

tgtttgaacataacctcgcgcaaaagtaataactcttaccattgtcaagagttcaatagaagcaagatattccaagttctatccaatatagtcagcc  
aaattgctcaaacagcgaccacgttcagcactagagagcttgcgtcagggagtattaggttaaacgtagcacgagggccttaacggcaacat  
cgacatcttcttttcagcaaaaactcgcaacgagcttttcggtagaaggagagaaaacctcacgcgacctccatctgaaggcatcaactgt  
aaattgacaaaccgataggttgtcatacgtcttaccaggaaaattaaaactttggagctttgcaatttcaagaacagaagacataatgacagta  
tgatagattgcaaaaacgaaatagataaaaaaggaaatagaaaggatgtctatgtagctaatcaagaacggaaacgaaaagatag  
aagtgttataaaaataatcaattggaaacgtaagcaagtaaagagaatcaaaaatagttgtctctttatccttctcttaagaagagacaactca  
attgcatatcaagataaagaattaacaagagtaacgaaaacggatacccaaaactcgtgctaaaagtaaagagaaacgaaactctta  
acaagtaatacaataaataaacaggtacgaagattgctaagatttaaaattgtgttacttacgactttcttagtgaactccttagccg  
tcagctgccagagccgtacacatgcacttatactacttaccctttgagatattcttattacaccaagcgaatataaaaagtgccttaactatgtcc  
tcaaatatgatcaataggattcccacgtgctcgcttgaagctgtctgtcgtcacttcttgggtatagcttcgattgcacggctcagggtgtcctc  
cttgagctgattatacatctgtacatccttcaggctggtatcagcttagcagcagcaatagcttcatcaagttccagcccttattcgtccatatt  
gtctacaaactagcagcttattaactcgccttctcagtaccacataatagttccaagccatctatgaagataaaaatgcctcccagtgatata  
atactagctacggaccataggtatgcttggcaagagtttagagctcttagtagtacctcgtgacgtattctgccaactcagggtctac  
ttcagccaaagttaaatttgcgaagctgtggactgggagcggatacaacatattaataaagaaagtaaaagtagagaaattgtcacctta  
ggaatcttcacggcttatgagaataaatatcgagtgaatataactacgattgtacagttgttacttgaattggactttgttactactcgtgat  
agatgctagtaatgtctagcaatctggtagctaaatgaaatgctcaaagaacgtgactagcgaatctccaactgaaagattcagtttaggt  
aagtggttatatactttgctgagacagctaacgtaatctattcttgtaaaacgaagttcttttctataagactccgttccgaatgagtcga  
ttttgttaaatcgatttttatgttttgttttacgatttgaatattcatccttagtcttaggcatcatatgctctgtgatactgtgataaaga  
agacacctatcgtgacaaaaatacataaagttgatttctatttagagattaaaaataacgagctcatagcttaggataaagaggtctgtcgtta  
acttggatgaattgttctgagaacgtatgaaaaatgaagtaataaggtcgccgtatgctgttgctacaaaaacaagaaaacccatctggc  
gctgtacagtggaataaagttgcaaatcggaaaaaaaataaaaaacaataagaataatcatgatggacgaaaagtaactaaagaagttcaa  
gttatgctaaatagttggacaatatactttgtaaaatctccaaataaacgggataatcgacatttctcaagcttgaattattacttttctatt  
ttctatttataaaagcctcgagttgggtagaatactaaaagatcgatgttaccctcgaatccatcgtacactagggctttacatacagatttcg  
tcgactccactagttaacatttccgggtcaggcaccacaaactaatgcatctgagatattacaattcaacaatacagaagccaattgactgattgtg  
actaacaagccatattttctattgatattgctttcatgggctttcttctgcatctcagtatacaacagctgtgaatgatcatgtgggggctgtc  
caaatattgttatataggttacggtaggtagaatctcaatccgttttaacgcgtagccctttgtacctaataaacagtttgaattgagagtt  
tggtcttttgaaaaaatgttgagatgtagaagcaagtagaatccactgctcaactagaaaaacaattggaaggagtattctatattccctcctt  
agactagagtgattgtaaagcatttaataacgtctcagctcatgtctactgatgtgaaatagcaacagcatcctaaacaagaattttgattccaat  
aattataattgttatttaatacataaaacatattatcatattaacattgtttatagcagcttcattaatcatgcaaaccttggctgagatttagga  
attgtactaaatattgacagatccttcgatgcatgttgaagcggatccacctaccttgaccttaataaccattagatattaatgaagtactacat  
tcaaatgtcgtcgcggccaacttgcaccttgagaaatgcttagatttccatcaaaatctcttccaatttattgttagaaagataaacataaatt  
ccacaggcagcggcaccactgcccgaagcaggatctcaacgacattgattgctggagcaaaagctctcattctatgcatatcatcatgcttt  
ccaaagacataaactccggtgaaccatattgctcagaagattagccatcatgccatagtcaggatataaatttaaacctgatgtgcagaatc  
gagttgaatggtaagccatataaggaccaacattgatgaaaatgggggtccatttcttcttggattgaccgttagcattgaaaagacagttta  
atggcagatagctactcgtctgaaactcgaagacgtaaaactctgttaattcgaaagcgtaccaaacatcgccactatctctcagatgaagagta  
atgtaataaaacagcctcacattcctgtataaactttccatttttggcagacaaaaccgcttctatgacagcataacatgaacctatcgtagg  
atgctctgcgaaaggtaactctttttgtgtgaaaatacgaagttgtaatgagcttcaggaatagttggttgagtacaaatgtagtctctgaga  
gatttgcacaaacagcaaacctttgcatctgatctgtgataagctcgtcagcgttgaacacgactgctaccggatttccattgaaccgcctttaga  
aaatacatcgacctgttgaaggatgagctgacatatccaaatcttccaatgttagaggaagtgattgaagttgtctataaattgatgcc  
ttgatattcggatataatagctaataaatattacgatcagatgtatgatagcacaataaatttaataattactcaatcaatcattggaagcttactg  
taccataacgatagaaagcgttttccaattacttaaaaaataagttgaaatccggctcttcttactttatagaaagccatactgatataagctgtcc  
agtgtcacagcagattgtccgtatcggtaatgtatataagtaggatacaattgttaattgctgtgatgtcgaatttgattgacaattaatctgg  
agacacatacttatctgtaataacataatctttggtaatcccaaatgtaagatgtgtgaaacaagtttataaattcagccagcaagatctgtg  
gaacagttggaatatacagagctattcttcttaactatgaatgttcaacgtaaatcattaaccaattgtactttctcagatcaccagaattcaca  
ttatcattaggaggaattctgtgtggttttttttttttttttttttttttttttttttttttttttttttttttttttttttttttttttttttt  
ggatgtaagtaaataggttagttgttagcactagttataaatgattcatcgtcactttttatctggataaccataccatcagcaactagctacg  
tatcttatagataacttatcgtgattgatttagtaaaccaaaagaatcagatgaatcaatattttcatgtagatcttcagcactcctagcaa  
aattttcaataaccattttttaaactcattcgtaattaatctctcacagaaatattccttactgattattacagaggtacaaccatttttttag

tcaggaccttcgtagttagttctctatagtaagcagcaagagcaagtataaaaagagtaatatgttatataataaccattcttttgggtatatat  
agtaataagcaacaatagagttttcttgaactgtaaccagagctctccagccatataatacatttcggtacttttcaaaactgtatgaaagtg  
atgattctcgttaactgggatacatggtaaaacattggcctcaaaacaaatcgcttcaagttcttgatgaaggaaactctcagatcgactaccta  
tgtctgtaatcgagttgggtatagtttttttttgggtcaccaaaactaatggcggaatctaattggtgtaagcgattttcgcaagaataacca  
ttcgtctctctaaatcgtaaacctgaaacgactctgcctttttactaggtgctgactccccctctgctttcattccatacatgaaccaattggaag  
cagcaagctcataatagcgtatgggatgacccaaaaatccttatcttctggaataaaacattttgattcaactgcagattccagtcacaacggg  
ctttcgatgactcatgttcattttgcatctgtctataactgcaagcaataatctcgtaaagctagatccgcttcatcatgacattcgctttcagta  
gatcttgccttagctgcagcatatccctgaaatcccaaagtacaaactacaaaggaatacaaaaattgtataaaggaggaacgcttataacct  
gaagtagtgtttttttctgcttagctttcccttccatttcagaacttcaagaattgagaatttctccattggtagtaaaccttttttcttttctgc  
agacaagacagtgcttaactaaaagattctaccgtcttctacaacgcaatgtactcatcacgatctgcatttttttttccaattcttttgcg  
tgtggagcatgcagcaaccagcaaaaacggattcattccccgaaaccaagagttcttctcttaataatcagaaactgttcgagggcgttttaa  
agtcacggacacaaacataagccattgcatatcaaagctttttaaattttagctggctgagctgaagtagttatcgtttgggttccaatattgata  
gcctttcaggggttcagtcagcaatgagatctttagttccattgcttgccatacacacttttattgtatcgtgctttaaacctctggataaaat  
caagttgattcagctcagccccgagattgaaaagtgtatatactcgcaatggattgtatcattccatagaaaagtgaaccagagaaaatc  
gctcctagtagcattattatacattgaggatttccacagctcctctagagcctctctactaggggttaaagcatataaaagatatttccgagaata  
agaaggcggaaacattgatactagaaagttgagaatgccgtatctgcatagaaccagactccacaatctgcttcaaaaagcggcattacc  
cggttaacagttatcatgccggaatcttttctgtgtacttttctacattttccagcaactcatgaatgaattgtacgttgcgtaacatgatagg  
tcgcttcatagaatctaagagcgtaccaccagaaatcctaaaatggatccatcaaggaaagtgtagaagaaaagacctggagttccatccct  
ggaggataatttccaatgtgtcatttgaatttcaactgtacctcgtaaatctcacaacatgttcagaacgttcaatggatctcgagcttgatga  
attacatggggctggagttccaaaagagcaatgtaaaaatattgtgaggcatctagagcatgcatttctacagagtttctctagttgtccttat  
aagcattgtagctgattaatgacactatccaaacaggccatcaacctctcgagcagggcaggatactctcctttcgtattcatagtttagttg  
ctcttctttgaaaactcgggaatcggggcgaactttttaaattgacctcagagtaacctctgtgtttgttctttttaaattatgtatgcaagt  
aaaagtgtataaaagcaatttgaatttgaatttgaatttgaataactcatttaaacaagctcatttagttacttttctacaacaaaaat  
aaacgaacctacaaatgtatttcgctagttatattccaactattcaaaagattccatgcctcttttacgctagtttcttttcaacgtttctgcaa  
aattagcattgacgtccttttataaaagtgtttttccaaacctacgtatgaaataatcatcagtgataagaatgattgcggttctctacgta  
aacactgaggaaggaacttctgtagttttgacagtttaagtttctctgcatatcgccactatttccaccaagcgggaattaaatttagctgc  
tttgtgtagttatatacaccatattacagtgacgatctcatctcattgaagcacaacgagcggcgaagttggagtaaaataagagattataagt  
gaccatcaactatcttaaaaaattcacaataatttcatagttcttagaaaagcaaacgttctttagaagatataactagaaatatttagtttcc  
atctacttgaataggcttactgtatcattggtaggtattctgttgacagacttttgagaagaccataacaatgatccattaaggctattactatcta  
ccaattcgatttgggctcataagagtaagaagtagctgcaataatgaatcgcgatttgcacagaattgaataaattattgaataaaactag  
aacaanaaggtcaatttttataatagaatagatagaactagaatagttataataatataatagatggaaccaatccaaaaagtcagc  
agcagagctgacttttccaatttggctcaagatcatatggttgaatataataatataatagtaaccataacgtaaaactgtatgttcgatgta  
tataaataagcatcccttgaattagaaacagatgatttagttcaaggaatgcaaaaatttaaccaatttctgtttgaattctccaaagtgtc  
gtacatttatttcaaccaacatccagcaaaatgcaccaacaggtcaccgggtgatattccatttctgggtggagcgtgaggataggcattaaat  
accttgcggtaaaatacaaaacttagcagcaagctgtggatgtcagatgaatcattaatctataagatcttgcctatgacgcacaatttgtgctc  
gactagggtaggttcagttagaaatccatgaacagagccatcgtttcagatttttcaagaanaactccagcatttactccattgtgatcctca  
gagatcaggaattcgacattatcgatcattcatcgttatacagaggaaggagtagctcttctcctctttataatttactccacaacggttgc  
tgtcatcaaagaggattgagattctcagagacaagaataaatttgcagaagattgatctttattcataattaaagcatcctgatccaaccacat  
atccacttgcatttggatatttccatcatctgaatcacgcttggcatcttgcctcaaacagtaggcacattgattcccgtaaaggtgacaaatc  
aaaattgtagttatgtttttgacatactcaagccgattggcacaacatcatccatgatggaaggatcaaacgagccatatttccattgcttccg  
agaagcaaaattatttcatgcgacttggctctgtgtatcatttcaatgaacgcttattgaagttgttagcttgcatacagacttctcatctg  
ctggggcaatccttggctgaggtggagtacgctaaatgggacacaacttgaatcatttgggtgaaaggaagaaaattataaagaaagatt  
aaccttgtgtaaatattgacaacaataaaacgccagtaaacagcggcaatgacaatacaaaagcagctttttgataccaaacaccggaa  
accattgtaataaacaatagatcttttaatacaataaatatctgatcaatgaaatgctgcttatttcccagcacaagaataaaatctcct  
ttttccctgaacgtaaggatagaagagtagtgcttaaacatgtggttggccttactccatggctgccccgttacttgaagtaacccccg  
gggactgcaaaaataacgcaataatgaacaaaacggtaatttattgcataaagtattatctatttcttctgtaggtcttatattattgt  
attgattcatattgctcacataaagtgcgcaaatatttgtttatattctattgatgtcgttactagaaaccgtatttctatcaacgagtcgacct  
tctagctgttcttgaatgagaaattaaagtatttgcggtatttattttagcttttgggtaggggagtaacaatcccactaactcaaaaagtt

atgctatgcgagatagctagctattaacagttctttacattgatttctgtctctatcaagttacattctgaccaagaaaaatacagtaaattaa  
agaaaagaccaattactattgactttcacataattcttattccaagcgtttcacacaccattcagaaccattcgcttagaacccttaattattaa  
gcataaatgctcactcactaccgtgactagtgactacatacaattcataggaaagtaaatgaacgttaaaaaataaaaaataaaaaataaa  
caaaaagatggctaagaatttgcttttagcaagcattagagaatcacattgttttcataatttgtaccttgaaaatgaagtcgtaacaaggatc  
aaaaccggttttagactgaaatgaatgaaataatccccatgaagacttgctacctttgtccattttcgtctttacagcaaaaacggtttcttcat  
ggacctgtcttagcaagaattagcaagcaagcaagtagaagaatatactgcaccaaacttatgtcatctttacgaaattaccataaaactt  
acgtctttcaatgctttttcttaaaaaatgaaacctgtattttaaaaagttctataataatgctattctagtagaaaaactcgtatcaaaaaaa  
aacatttaaaccgaactaaacctgattaagtgaattatgcatcagttataattagttatcgggagcgggagctctggcattggtagcaccaa  
cagtagatccccattcaaccaattccttgggtgagtcagtcagtgattgtagcattcaatcaaggtaggaccctcttgttggaagagcaattg  
gatagctgtcaagctctcaccagtggtggccttgagaccctggccttaccgtcttcagcgtgaaggattccatgaaggcagcatagctccag  
ttcttgatacgggtgtaaggacctcgtggattgaaatcctaatgggtgaaccacgggttgattgattaagaagatgatgacagggagcttggaaga  
accattgagcaagttctgaccagtcattggaaggagccgtaccaaccataataacggttcttctgtaggggagcaacagcataacccaa  
agcgggaaggaacggaccaaccgatgtgacccattgacattcaattcaaactggcaccttcgggcaagttcattgcataccgttgaaaccaag  
agtccaccagttcggcatacaaggtgggttaccgtcaatgacgccttggattggcgcatgagctctcagagtaagaagctccttaggggtg  
caggagcatagttgagcaaggcaggcttaatgagcagctactcgaccatagtagcgttcttctgaaacctgtcagccaagcggccaagaat  
tcgtccatcttcacaggggtgaattcgtaacgggcaaggtaacgtgcatgtaacagagtcattgaattgctcagcactgggaccgacctgtaa  
ccgttggagggtgtagctgtgaaaacggtaccagcaccaatgaagaagtcagcgaagtcgcaatcttgcagcagcagagtgtagccaaac  
cccagtaaacaccagcgtagttctgaaatcttcagagatgaaaccttagcgtgggttgacaacgacggcagcatcaggggttcagccaac  
ttgaggaaagcctttcggcaccagcagcagggagcttaggaccggccaacatgatgggcttctcggacttggaatcaagtcagcagcaacat  
cagtggttcttcaagagagggcttgcagaggtctcaggctcaatgacagcactgatggggccaggcttgccacaaggttagtagccatgta  
gtggggacttcgatgtagacaggttctgttgcaagatagcttgacgaagagcatggtcaatcaagcggggagcctcagcggcacgagggag  
gcaacagcagcagcagtgaggttcttagcagatgtccatttggtaatacaagttgtgagtagcaatggtaggtgcaaaatgtgagaggagttgag  
gtcattagtttaggggaccactgatcaaaataacggggaggttctcggcgtaagcaccaccaataccatcgaaggcagtcgaaggcaccgagc  
ctgtaggtgacaacagcagcagcagataaccgtgagcagcagcagcacaacctcagcagcgaagcagcagttcaattcgtgagcagccaatctcag  
acaactgggggtgtagctcaggttagtcaaaaagcttaaggtttagtcaccaggggacaacgaagtggttagatgataccaattggctcaatctt  
cggcaagatagtcaccaacagtgaaatgagtagtcttagtcatgtgaaatagatgtgattgatggcattcaatggaggactcaccaggtattat  
aggacagaagccttccggaatttccggcgtgaagtgaataatctcacggcattgctactctttgcactctttcaaacctttgttactttagg  
ggtatttctgggaaatatccaggtccagccaatcggcggccaggacagctatccggggcagcggctgctcaacttttcgcaagttgtcacctggg  
aaaaaatagaaaaaagctcaataatgctgtaaaagagcagcaataaaaaaatttctttaaatttatttagatataatgagctatg  
ttcagatagtagtctgattatacggcttcttagttagttatggaggcaaatgcgacggctgggaacctgacttctattggtcggcaggagcg  
aataaaacgggaaggtgggaccatttagtctctgtaggtttatacggatttccgattggtgaaattatctagagttgatctagaccgtacca  
gatttgtaaattgagcttctgaaccacgcgaaacaggatggaacattatcgagccagtggtcttgaagcttctcgtgtttccacactttta  
cgttgattgtctggcaaatatcccttctgtgtgagaacgtaattatgggatactttttttttttagagaatgagtttaggttgggcttt  
tcagtaagtcagcgtctatctcgcgaaatagatgaagaacgtaagattgtgtgcaataaaaaataaacattttcttctgtagagaggaga  
cacttaatatctgtagactactcaatattataatgtgttttaagtattgcgaaacagatgtctcatatagctaaacgactaaagaaaaacatgta  
tatgggtttaaataatgaaatgaaatgctgtatataaattcttctcgaattgacatttctatctcagaggttataattctacttttttttggattggg  
ggggggaggaagagacatactgtaggtgtttcataatacataattaacatttgagattaaaaatcattcgtaacgcaaatgattaccgttt  
ctttgttctgatgcatactgtgtgctgcatctgctaaaaaggttacttttggattgttatagtgattattactaactgtttttacgggtgct  
ctacggtagctatgaaaccatttcttataatgcgataatttgaatagcgaccttgggtgcaataacaatctcaccgaagaaatgtttattattg  
caattctgactccaactgaattatgatacaagagaaggaaacaatgcctcagagactcattgcataagataagcgcattcagataactactaa  
gtattgtaattgttctgttacagaatgctattgctgtagtaattattgaagcaaaatgacttggcattttgacatcttctgctgttttaacgttta  
aaagttattatagtgcatccatctttagtggtttattaggaataacgatactctatgcaaaaggttaacttctgataagcaactaatcaactta  
aacaatttactttatattactacgtgactgataacggcctactgtaactgattgatacagtcaggtcatgcttcaactagagagatagtg  
taacaacttaaaacaattgttacctgtattcttctcatcgttaattgtctttttgtattttttattacatttacatttcatgcttataccga  
gatattttgatcttcttcttttttttttttttttttttttttttttttttttttttttttttttttttttttttttttttttttttttttt  
gtcattggcttagaagagtagcaagttttgcaatgcgcttctgttacaggtaaacttattcttattctcgttcttgacaaagcgaagcagatagc  
gattgcaattgcgattgcgataaagtcacacaagattgcaaaattgtagcaataatgatacaatacaataagattttcttataaaatac  
gatagcactgcatactttaccctcatcttactttctcccttagagaaaaactacgacttttgaagcttttattgcttaatttttaattcatttctt

ttctttgttttattcgtttatttattatatttatttatttattcgcgcaattgaggaaaagggtttgtcattagttaacatattgcgttcttttggagtac  
gtacttgaagggccaagtcttctgtgtgatggtcatttttgaattggattagataaaggattatctactttaatttacgtacataaaaaatgccga  
aaggaattaaccggcatccatctacttcatcggaagactctaacacgtattcggaaggtccgggtcagtcattctctataccaacaccccgtacg  
ttgcttctccacaatagagcaagtaggtcatgctcaaaaacgggtgatagtaagatgatgatgcttattgaatttcgacaatgacgaaaaatc  
caaaaaaaaaatgtacatgaacaagtgaagggtcagaatccattcaatcaactactgatcccaccaggcggatccgatgaagtagataccag  
caatcttgataagaaatcaaagccaacttttctccggttgatatcatcatcttctcgttctcaaacaggctaaactgctattacgatgaca  
aaggtgaacttgaagattctatctatttgaagtttagagcgtctgtgccctaccgatgatcccaagcctgtgaatacatggagaacctggg  
tgcttacagccatttttatttatttctgtctgtgaatcagttctcagtttacgttatccttcttacaatcaatttcatcgtcgccaaattttt  
gttctctaggtgaagctgtaaacctactcccgaattggaaagtcggctaccgtcgttttctgttcttttaaacctggctcttcaataccaagga  
acacgctacaattactattgagtttcttaacatcttctacagcttatgccacgaacattttatcagcacaacaagctttataccaagagctct  
cttggggatacaagattcttctgtactgacttcccaaatgcttggatagggcttctggactcactaggcgtggattgtctaccccgccgatg  
atttggccgcagacttggcagtgctctctttcagaacccttcatggcgtggtgtaagatgagattggagaagtgaagatggaaggttact  
gcgaatggctggagtatactcgtatcgggttttccatatatttctcattgctgttttctgtttattggtttctggctcatattcactgcttct  
actttaccttttctgttggatctggccaaaaatcgttgttaaaccagctattcggctacaactcgggtcttggattcttctgttaccattgactg  
gcgcaagttgtatataaacaatccttttagcttcccctgggtgggttattagtaataactatcggctctgtgatattaatctttggattgtctacc  
atttgtactacaaggtgtctggttttcaaattactgcccctgctatcttctctacatatgacaacacaggtaaatcattcaattctcagctgtt  
tgaacctgattatctttgaccaaacaagatgagtcataattctcctttgtatagccatgtcttatagtagtctacagcattaaacttctgtc  
tgtcacttctatattcgttcattgtgctttatacaacggtaaggacatagggcagcgtctcgtgatgaacgtggatcatttgagtggtccatcgaa  
agtaatgcgtaattatcgggaggctcctcaatgggtgatctggcttcttctgttattgctcgtctatccatttctactattcgttattacgatac  
acagtgccagatgggctttattgttcaatgctcatatttattattaacttatttctcaaggcattctgaaggtattactaatcaacatgttgg  
ctaaacattatcactgaattaatcgggttattatgttaccgggtaaacctgttgcacaacctatgattaagctgatgggtttattccatgagaca  
aggttagagtttcaagggattgaaactagctcaatatatgaaggtacctcctcgtattttgtttcagttcagatttctgctactgtccttgggt  
ataacacaagttgctgttcaagaatggatgcttctatataactgatattgactcataagcaagtgatggattacatgccctaatggacgtt  
cagtcataatgcttcattaatttggggagctattggaccagctaaactatttcaaaggaaggccttattacccttattatacttttctcaattg  
gtgcaattgctccatttttacttatgctttatataaaaaatcccgaagcctggatgggaagctcaatgctcccgttttttctgggtccaggaa  
acattcctcgtctacgggtattaactactccttctgggtattgtaggttcttttaattatgcatccgaaaaaggccgtacattggtggacc  
aagtacaattacgttggcagctgcgatggattctggcgtagctgttctggcgttattttcttctgtatcctatcccggaggcaggttagac  
tggtggggaaattccgtttcaaaaaacatatgactggaagagtagccttatcattctgctggctcaaatgaaacatttgggtatgacacttgg  
gtaagcgtattatacttaaccgaacaatgattaatgccacataacgggtgtgtgtgtgtgttttaattatagtgatgtaacattcatctt  
gtataatacaagcttgaattgcaacttattccatagtaattagaattttataataagaaatttgaattgataatgtaacttcttctgttagct  
gttatgtaaggagttctgatagtaaaattctgtttacagacgtttcggaaaatccactaggagatctagtgaataatgaagtgatgatt  
aatcatgtatataatataatataatataataaagagtcatttggattattaatgagtttacttttagtgtaaagaattatctgaagggtct  
gtccatgttcaggtatttctgaaggatctagaagtcgactgaaggtttcaaaagcaatgaaagtaatnnnnnnnnnnnnnnnnnnnnnnnn  
nnnnnnnnnnnnnnnnnnnnnnnnnnnnnnnnnnnnnnnnnnnnnnnnnnnnnnnnnnnnnnnnnnnnnnnnnnnnnnnnnnnnnnnn  
gtagtaaagtaagtaattaactatgtatataatataatataatataatataaagagtcatttggattattaatgagtttacttttagtgtaa  
agaattatctgaagggtctccatgttcaggtatttctgaaggatctagaagtcgactgaaggtttcaaaagcaatgaaagtaatcatgtcag  
ctaaaccgtttatgatgatattttatgcaaaattatcgttttctgaactcactcagtgatcatatattatcccttttttggaaacttgggtga  
gcaatgtaagtgaaacttataagaaaatacaagaaagagcacttaaaagaacctggttcaaggattcttttcagcaaaccttagaatcttaca  
tttactttctgactagagtgatcatattcaactagactcagccttctagacatacaaatgtctgatataaccacatctaatcaataaacttc  
gttaaacataaactatttcagctatcaggttggtagctcaccgttctcacaataaacacaaggacataaggcaaatattgtcaaggagta  
aacaatcttatgctgtaaaatgagaatgaaagaatttctcatcgcattacttctgtatggctcatttatttcaagaattgcttcttgaagaggtaga  
aaaaaataatataatagtagtcaccagttgaaaacaacatatagtaagattcattcttttttgcagaataagatttagcaatgagttcaa  
ccgccgttctgaagcacctcaaaagattacgcttgaaaagcatcaaacgagccctaaagagtcattgaattcaatttcaaaaaacatattc  
aatggtaatttaacagagctccagacgggatcaccttgattgagagatagtaatggtagcttgaaaacttatgcttctcctaaagattacgaa  
ttcggcaactgcttccattctccagattccaaggataagccgtggataaagtagagttttatgatcgtggattgaatgcggatcccagtttctc  
aaatttcttgggatctaacgaaaattgagcatttggcaagagatttgggaactgtcttacacggagttcagttgagtaaactgacaacgctca  
aaaggatgaactgctagattgatcgtgaacgagggcgttatttcttctgatcaagagcagacaatcgaggaaattgaaaggttgggtctgta  
ctatggttagccacatattcatggcgcaatgcaatcccaaggaatgaacgatggaaaaatttctatgtagtttattctgataaaaaactcggct



ggatgtcctgaatggcttacctcaaataagatacttacacacggacgtcagtttgaagaacagcctacagcacagaccttttcaaagctttaa  
agttcctgatcaagggtgataccggttttccggttacctgctttagaggcgtgctgaacccatgaagaattacttagaggccttaacat  
tggtacattctggcgttgaacaggcagaaagaagacgccaggcaggacatgccactcgcgggaaggaatttaaccgctcatccaatcattcgt  
accatccagttacaggatggaagtctttatagcttagctccaggtcagtcgatataatcccagagattcccagagctgagtcgatctatttga  
tttctgtatcagcattggcgtctttgcttcttaccgttaaaatacagtggtcgaaaaacggagtcgctcatgggacaatcgattttagtgc  
accgtgtacatatgaccatattcccaaacctgccattttatccgtattgctgctggtgaaaaaccatttttagacaagaatagtcgtgagcg  
caaggacgtgctttgattcagcctaaactatagcaaaaaataaaatacaaacatttcaattttgcttctgactagagatggaaagtgcattatccc  
ttctgtaactaatctttagataagtaacgttctcatttaattgacgcggttattttttatagcaataaaaccttacaanaacgtgtaatgtaatcttt  
cgtacaggttttccatatttccagctttcgtaaaatttagcaagcagccagttcatatgccaagcattctgttagattgaaatcttaaaaaacggg  
ggactcatgtaacgaacaagactttatagcttataaatcgttatatacaattgcttttagccatataaacaacctttaaaggtaagtataataatg  
agatgactagtcctaatgctgatcaagatgctacaaacaaaaatgcacagctacatttaagctgataagttctgtacaaaataatcgcgcgaat  
tcagcaaaactaattttatctcttgagtcgttcagaacgagaatgcacattgaggtctgtcggacgtttcattataacatagtaatcagatggcg  
gccattacatacaagatacagtagagtagatgaatcggaatgacacaggttcggtccgcttagggataattctcgtcaaattctctggcaa  
accactgactgaatgtagatagctcaaatcagtaacaagatcttgggagaatcaatctttatgatgatagatgccatgatctacgtcaagatact  
atcgtcaaattcaagtaaatattatcttaaagcgtatctatcttatataataagcatgctcgtagaaaaatcttgaagaacctcaactgtactg  
aaacaaacaacgcaacaaggataacaaacattttagaggagaatggagcagcttactagagttaaactgctttagaaagtgggaatgaata  
aaaagtagagggtcgggttaaaataaaagtataccttgagtcggctgaaaagaaaaacagagacatgatctaaattgcaatgtcaaaaatg  
gagacgaatgaacatgaacgatctcctgaagaccgttcaatcagcgaaaaaggcagaactgatataacgtttcaagaattgccgaataccca  
aatcataccctgatgaaatcttctggtagacttcgcaaaaaatgatcctgaacgacctgaattgggtcaatcactaagaagcttggcacaacag  
cattgtatggaatgacaaccttctgctcagtttaatagtaacaacatgtcacctaccgctggacatttgacgaatgatacccatcggtcaaga  
ggggctacgttagctacgtctttatagcttaggaatgcttttggccatggccttttgcgccttttcagaaatgaatgggagaaagatgggag  
tcttttacctttttatccatgatatttacaacagggactgctagctcagatagtgtagcagccattatgtgactcgggtttttctggctttttg  
ccggtgcgcctattgtctccacaggtggtgcttggctgatcttggaaaccagcacaaggccactgctttgggtttttatcgctctttgtcgtta  
gctggcgtgactttggcctattattagcagcttacttccgaaaggttcagatacagcttgagatggccactatgggttatgggtattgtccagctc  
gttattttgcttggatgttagctcgtgatgaaactatgttctgtaattctagctcgtaaagctgaaatctacgtctttctacaaggaattggg  
ggctgcacgctgctatgaacaatacaagttagacgcaaaagagttgttacctttcatcttttgcaccttttgcgatgctggcaacgccaattgt  
cttttcatagctctattgctagttatgtatatggaatcctttatagttttgactacaattccttatacattttatgtcaagaaattggcagggga  
acagttggtaactacctgattgcaatgtttattgggtgctaatggcggaacttttaataattttatggaatagaaaaatgcaaaattactttg  
ggaaaatggcggtagcctctcccgaacagagattaccgttgatgatgatggtaggcttgcttatgccagctggtatattttttctggactt  
cagatgccaatatccattgtagacaccgtttattggtatatccatgataggtattggattttctgaattttccaaggatgctaaattacctgtgg  
acagtttacaagtttctgctcatcggtattgctgcgaatacattacgagatcgatctttggaggtactttccattattttctglatatgttcaa  
gaagttaggcgttactgggggtggaactttagtaggatttattgcttggaaatgattccaattcctttgtattttttattttggtaaggttacgt  
ggaagaaaccgtacgtgaagcttggcttagcttttgcctttattccttctcattcttaaaatcttagcttacttttattttctttatattat  
agatactagataatcttattagaagcaggaatgcaactaaactaagttttacagattattgtagacattataatccaaggctgctccggatatac  
caatttattagaagttgatctaattcttcttctatcagatattgtatgggtaaaatctgaattgaagctccagctttatagactataacaaga  
acagctataactttcgtgatataaaaagggttctcattttgtagttaaacaggtttccataatgcaataacagattctctctgaatacttagaa  
tatatgatacaagcattcaattacctgcaaagcactccagaaggaataagcagcttagtgaactactagtttcaggattcagttgcagaaa  
atgattacaaaggcaagtcaagatgaacataaattgggattcgattggttactatgaagcttctataattaccattctcaagtcgactctccagc  
aagttgcaattcagaaagtaataaccattgggtataacatactttaagacaagaatcacattttatcctgtgaataatagatcagtcgctcaa  
agattacagtcgcatcaagaacgttttacttgacattaaccgaagttcgtatagctgtaaccattagacaattcattggaactgattttac  
gttcgtttcatttcttaagtagcaccacaagaaattttttagttcccttttttgaagaaaaatgtaaaaagcaattggaaaataaccaagtt  
cctattcaattcgataaggcggaaaagtaattctgaacatagcttcaaacactcttctgcaagtaaatgctggtcattatagactcattcctaaa  
agctttataagatttagccgattttgtttactgtcattccaagcaaccaatataagtatattctcgtgtccatcataaattttatgcatcatagtc  
tacacagtaactatgaatcaaaaactttactaaatgaaagtaaggtaatcctcctagaagcaatgaattcaactactttataataataatcgt  
aaggtctactctcgcgaccttttcaatgaaaggtcaacgattgtttatcatgtattctaataagaccgtaggaaacgtatgtttcaacaatcaca  
cctattataaatacgcatacaaaagggtttctgactgctttgacctagaggccatcgcttaccttactttgtaaggcataataaactctgaactt  
ggtgttcaaatgaacattatcaagacaacaataaaacataataactacgtttttatgaatacaatcgaagaacaagacacggggtttttatt  
cctttcaactatataataattatattttcgggtgttgagtttctgtaattgtacagaataaccgtggagatataaagttggactgacacctatcg

acgatttctgtatgcttcaaaaactgtactatcaaaatggggttcagcaaccataaataagccatgaatctatctggttggctctttcatatgct  
acaacttgaaggaaataataagaaaagatttctgtaacttcttgattgcaaatggaatgataaaatataacttcttttctacta  
caatgctgtagtttttccgaaagatgaagggttgaaatgctaccacaagttgagcattatcaacaaccgatggaggagtctgaacaa  
tcacctccctgacagtttgcgtgctgaacggtgggacttgacactcaactcaaatatgggttgcgacttgccacaaactaaatgctt  
gacggattggtctgtaaaactgacattgctatcgttggtgtgcccttgatactgacagctatctatcgaccaggagcacggttggtcctcgct  
ttcgaactgctcctcgcacaacagctcttcgtagctcaatcctgttaaatcaaccctataaaacaaatacaagattatgactgtggt  
gacataccatcacgcccttgataacaatggcattaaaaacaaatgacagaaggtatattgaccttcttctcattctgtgctactcctgcaga  
ttcacgcaatacaaggacttcagctctagcaaaagatggaaagttatcctcgttggttcgcttggcggtgaccattcaattgctttagctcac  
ttagaggacttgggaaattataccaaaatgtgagcgttatcatttcgactctatcttgatacatggaatccttcaactatcattcacattggatg  
caaagcaaacagagtttactcacggcactatgtttggcttccagccaagaaggcctcattaacaatggaagcttattcatgccggttgcgca  
ctcgattaagcggaaactgactctttagctatgagaagatagacgagttggctttatgcttattgaggctggcgaattgagaaatcgaggtaa  
aaggattgttgaaggataaaaaagacgggtgggacaacctgtataccttagcattgatatcgatgctggtgatccaggctagcaccaggga  
caggtagcctgaaacaggtgggtggacgagtcgtgagatgaagagtcttcgagctttagatggacacctgaactgtagggtcagatc  
gtggaagtatgccaccgtacgatgatcaggcagaagtacagctctcgtcgccggacttcatctcgagattgttcaattatggcaaaaaat  
cctctttagcctccgcaaacatgaaagaggttacagaatccgatttcgagaagaagtagggttacttcatgcacttcttctatgaaatgtt  
tacgattttttagttaaagatcaagttagttaaaccatataataatagacatctccttgaagcaggtatgagcagttcttaatttttttt  
ttttttttttttttttttttaaattttttaaatttttttaaaatataaataatagagatagacgagtaataataataatattatttagtt  
agtatttagtttagatataatagagaatacgnnnnnnnnnnnnnnnnnnnnnnnnnnnnnnnnnnnnnnnnnnnnnnnnnnnnnnn  
nnnnnnnnnnnnnnnnnnnnnnnnnnnnnnnnnnnnnnnnnnnnnnnnnnnnnnnnnnnnnnnnnnnnnnnnnnnnnnnnnnnn  
tttttttacttttttttttttttttttttttttttttttttttttttttttttttaatttttttaaaaaaagtaataactgagatagacagc  
gataagtaattca  
tattatattgtttaagtgctatgtttgataatcatttgagaatgatcatttatcgaaaccacgaatttgaatataaataatgacac  
acacatcaatcgtttgggttcattattaagtgtagatgacatgaggattcctgcgaccaagaacgcaagaatggcagtagtaataggtag  
atcacctctgctatgatcaatgacaaggtgctgggattccgattgaaagcaaacgctgatacgcgctgcaacgggttctctcagatcggctgc  
tttagatataatccacgcaatcattccagaacttttgcgcaatgaaagcaaatgaggacgcaaaaattgtccagtcaatcgtcggagcgtc  
ttattgattctgctgcaaggaattgaaatgagaaatgagcgggatagcattatgattttctactcattttacatcagccgagatagtgaa  
tcggaggaggtttagcattatcacgattgctgattgcagacacataatcaatcgctggagacgtcaatccttagcagacataaacttgacagc  
acctcataatctactgcttttagccttccagacctcttcccgcgaccagcagagaatataactacatcgtttgagttccttcaatagacc  
agcaatcctgtagcggatgcttctcaaaagaaagcatttaggtcgccgccccatttcaatacttttgagagaaggattacgaattacat  
tgatacagacgttttctcctcgcacacctgtataaaaagtaagggcaccctacgtgcctccaaacaccgtaaatacagctcatagttaagat  
actgctttacgtattcctataaaaaaataaaaacaaaggtggaacagctgagtggtgagaacttactaagaatacaccaggttgaa  
agaacaattatagttgcttactcatcagtaaagtaagctgatctgacgactgctttatctgcttctttacttactacgcaataatcgtataa  
cagcaatgacgaataactcattattagaacattcatgtttccatttggaatgctgtgcaagtcagctgtgatgattggttagatgcttattga  
ttggacttggctggatcttaaagcaaacgacgacaaggaaatgagagaaagaccgcatggaagcaaatcagcgtcagaaattggttat  
atctggctttctcgtgtgctgggtaaaatgacacatactcacttactgctactatggaactgtgctatacagaagaatataaagaaattcgt  
tgcaatgtaaaaatgaaactgatatttataccagaaaaaataataaaggaaatcttttagtctatgatgagccttactttagctcgg  
ctaactatgtcggtaggaaataacttaaaagctaaattagcttggtagtagatacttgccttaattacaccattacattttggattatgaac  
catcgtctatcctatcgcattcttaacagcacacatatttcagaaaaatggctaatacactggctatcgcttataatatttctaaggtgatgaa  
agtttagattatacaacgattctataacaatgaaacgaaacaggaaatttcttactctatcttttagcttctatattatagcaggttaaat  
cttctgtagaaagtgcttcaaaaaagggatagaatttactggcaatacaaatgatcattcctcctcgtcaaaagtag  
cgaggaaagtttagtctgtagcagaattaagcaggccgagaagaaaaaagaaaaatccgtggtgaaaggattccttacttatgaa  
caagaacggcgagttaatcccgaggatgaggaaatgatgaactgtgcaatcatacaagatgatgaacagttgaaacaggaagccgag  
atgaaaaagtaaacggaagattgattgtttgctgcgggtcatgtgtattacatacggagttcaatatcgcataagacagccgttcgtacgc  
agccgtgatggaatgaaagaaatgcccattaaagtggaagtgcgtatagctggctccaccattttttagcttctggttatgattgctcagatc  
cagctgggtatcttacaagatacccgatccattttttgtcagggcttcttctggtcgctgtgttttacttatggcggtgacagaa  
ccgacatggcttactgctgcttctttaggagatgttgaaggatgctgaatcctgcgtcgtgcttctcctatgtggtataaacggga  
ggaacaaccagttcgaactgtgtgctggtatgattttagcgttccacaatggtaggtccttcttaggatacggaaacaggtatcaaaagg  
aagttaccaattggaagatccgttctagtaattggagctattccaactatggtcgttgggtatattttttccaaaaatccagtagctgct  
aaatttctaaatagcagagaaaaacgaatcgcgatagaacaggtcctaagaatcgaacaggaaatggaacgaaaaaatttagctctcaaa

gcccttgaagcatttaaggacccccaagttatgttggtcctatataatggaatgtgccaagtacgaacgcgatgtctgtgttagcggccta  
tatccaaggaatgggatattctggaattaatgctacgttgtaacattgccatccggcgcttacagttggcagcatgatattgtgggagtgttt  
ctcacatcccgaagaggagaatccctctgtgtatgtttaccagcagttgacgattgtgggagcacttatgatatggaagattcctgattcta  
ccctggccccgagtagtggcggtttggcttttctccagtcgcctcaggcaatgcattgattctttcactcttgagttcaaacatagctggatatt  
aagaaagtaacagcgaatgcgactatgtttctatcttactctattggaaacatcgttcaccacagttatthaagccaaatcaagttcctgaatata  
cgagggaatccaggcgtcactttagcaacgtgtctatttgaagggccttaacctctggcgatgtattatataacgaaaactaccgagaga  
tatatcacttaaaagacatccagaattcaattacagtgaagaagaagagttttggacagaacggatcgagagcaaattaagttcgggata  
tttgtaaaataaattaaggagagaatgttaactaaaaggcctttgtttccttgatttcttaggtatgtattgagtgtataactttaattc  
tacgatttaataatataaattggaccataaaattcagtaagtagttttatgtatacttggtactgtgtgaagctagcagtagagtaatta  
caattgaatgggtataaattcttttattcaatgtacgctttccccttgagcaaacctttacaattatgtccaagacaagtttgcatctgtctctg  
atgtaccttttagtgggtcatgagcggagtaagcgaagaagaaaatagctgaacgtctattaactaaagcatatgattgaacgaaaagaa  
aatttagataaaaactgattcgaataaaaatctgtattatcgtatgtatgatttagatcctcaaatatgttgatccttggatccccttta  
gactaaactactcttcaaaaggagacgaagatatacaactatgttacgaacttagagtttgggtgatataaaaaaaccttgatgcttt  
agaatgaattgccttgaagcaagtttctaatagtatgctaaatcataaaaggtttggcttttattgttgatggaactagttccgtaaaacaag  
tccaaactgaccagatgtgtatgtgataggaacgaagaactgaaatgtccttaaggtgccttaataaaggccctttcataaaagaattca  
ttttcatgacattcttcaaaaagtacaacaaaattacgtgaagtagaaaatgcccaacgtacagtaacaaaatggaatctcgtctaaagttg  
gtatacattaaaagtaattgatgacatgcttgaccattgttattatagtaagagctcaaatggaaggatgatggcctagtcataacaacttt  
cgaagtaaaagtataatataatcatattccataagaaaaaatgaacgtgactgagattcaaacattttattcgagggaacactgattact  
gagaatgtttcagattacaaaacgtaaaaccttctgtataaaacatcacagagtaggctgtatataattgataatatacattacgaagaat  
atctcggttggcgaactttgtgtcaattgatttaagtaaatcgaccttggcttttcaagtcgactaatccatcatctacacagtaagcatcag  
atactaaaaaggctagaaggctttaccattccacataaaaccagacataacaaaagaacgatgaatttaaaaatctgtatgccaatgaatt  
taatatccctcctcatcgcaagaatcatccgctgccatccaatgtttcgtcgaagacttgacatagcactaaagagaagaagattaatgtaa  
ttttcatgaagctaatttctgtcaaacgtcaagctatttcaaatgcctataagcaaaaggcaaatcgagtagccaacatagatgatgaagagcc  
tctcgttgggttcaaaaggcatagaccgtttgagagggagtctaggtgagattaaagtaaaactcagccgatcgcatgaggtcaaccaga  
acagaatatacacaagaaagaacaatgggtctcaagtttcttccatccttctcaaacgtaaatgatccagatgaaggttaccactattact  
gtgtggaggcagatagaaacttaaccagagaacaatcgcttaagatattctactggatagggcatatcctttcgtcctaatgaaactgtagga  
ttaaaggataaattcgaagggcgggtgggttggcttggctgtgattacaatcgcattctcaatttaatgttcttttattcatgcctggtt  
caataccgataaactttacaatgcatggataatggccatataacttcttgaatactattatcaaaaaatatacgaaatgatcgtgaagag  
caaattttttataactgttctccgatctagtattcagatagggcttaagcggttattttttctgaaatccgccttctgattgatcaagttagt  
gaagtgtacattatcaaatcttcaacaacgaatactgtgttaagcactaatcaatcgacaaaactgttacgtggaatgtatattgtcg  
gcagactaaaactttcgaactgtttgtgcaacgtatactattgtttatcgcaaaatthaagcattatcaatagttgtcactcctttggcggagtt  
taagattgaataatcaacaattcgtttcaagccaataaaaactttcaaaatcctaataatacaatataacgttgacgttgttcgcttgaca  
acataaaaggcccataaaagtactgatttctcaaaagtttttggattgggtgtgtaatgttgtaaattattagcaagaatcatctttcattgac  
cttactcttgaataatgaaaactgaatttatgaagagaactttttttttagtagcagaagaacagccgctgtgagcacatttttagcacact  
tgccttattcacaaggaacaaaagaaagtataataaaaataaaactaaaataatacaatggacaagtaacaaaacagaggatgctaaaag  
gtttttatatttttatacactgaaccgtccacggccacacctaggcgaaaacaccagttcccgtccgatcactgagttgagtgaaaacg  
tctgatggcctcgttgtactatggttgagacaacatgggaatccggggctgtgtaggattttttcctctcttacttttaacgcttctctgacc  
gtttttatggaagtgcgagcaactactttctacagaaacctgctcaatccattgtttatgtttttcatttaacgaaaagaacgcaagcagcaa  
agttgtataaggatgttttgattgtcgatacagtgcaaatctcatagatagtggggtacagcaaatcgaataactatcattttgcaaagcctc  
gtcacgtctcgaacggaagaatgactgttccatctcatctcgcattcttctgacaaaacaaaacctcaattgagcaaaagagagct  
cctaataagtaataaaggggaaaaactagttaaactaacggagtcaggtttcaagttcnnnnnnnnnnnnnnnnnnnnnnnnnnnnnnnn  
nnnnnnnnnnnnnnnnnnnnnnnnnnnnnnnnnnnnnnnnnnnnnnnnnnnnnnnnnnnnnnnnnnnnnnnnnnnnnnnnnnnnnnnnnnnn  
caccagttcccgatcactgacgttgagtgaaaacgtctgatggcctcgtttgactatggttggagacaacatgggaatccgggggtctgta  
ggattttttcctcttctacttttaacgcttctgaccgtttttaggaagtcgcagcaactacttcttacagaaacctgctccaatccattggtt  
atgtttttcatttaacgaaaagaacgcaagcagcaaaagttgtataaggatgttttgattgtcgatacagtgcaaatctcatagatagtggggt  
acagcaaatcgaataactatcattttgcaaagcctcgtcacgtctcgaacggaagaatgactgttccatctcatctcgcattctctttc  
tgacaaaacaaacctcaattggagcaaaaaagagagctcccaatggtaaaataagggaacaaactgttaaacacggagtcaggtttcaa  
gttcattatgagtgaagcgaagattggacgaacgaagcttggaaaaatgacaataacgttaggaaaaatggaaccaacgacaccaattct

ctgaatacgacaattcgaggaaaagctcgcttcaattggatttgcmaaactactcagaagttgttataacagtggagaggacttgaaaagggt  
ttgtttacagcttccctcttctacaatcaactcaaatgagtagcagagtcgaatccgatagtaatacaaatcatcggaatgaagtgcgtgaa  
cgcatggcagaaccctgcccagacagatcatggggaagctgtatcctcgattgcatctgcatgccgttacgtccccgattagcaccagcgggcac  
attgaaagaagcaggatatttctgatgtttatgtgtatctttatacgtctgctttatcttactnnnnnnnnnnnnnnnnnnnnnnnn  
nnnnnnnnnnnnnnnnnnnnnnnnnnnnnnnnnnnnnnnnnnnnnnnnnnnnnnnnnnnnnnnnnnnnnnnnnnnnnnnnnnnn  
tttaacgcttctctgaccgttttatggaagtgcagcaactacttctacagaaaactgctcaatccattgtttatgttttcattaacgaaaag  
aaacgcaagcagcaaaaagttgataaggatgttttgattgtcgatacagtgcaaatctcatagatagtggggtacagcaaatcgaataaact  
atcattttgcaaagcctcgtcacgtctcgaaaacggaagaaatgactgttccatctcatcgtcgcattctctttctgcacaaaacaacctcaat  
tgagcaaaaaagagagctcctaattgtaaaaataagggaaaaactgttaaacaggagtcagagggttcaagttcattatgagtgaaaaagc  
gagaatggacgaacgaagcttgaaaaatgacaataacttaggaaaaatggaaccaacgacaccaatctctgaatacgaacattcgagg  
aaaagctcgcttacttgatttccaagttactcagaagttgttataacagtgagatgatttgagaaggggtttgttacctattcctctac  
ttataaacaacttcaaatgagtaacagagacgaatatgatgataatcaagtccatacggatgaagctcatggacgcatggcagaaccctgcca  
gacagatcatggggaagctgtatcctcgattgcatctgcatgccgttacgtccccgattagcaccagcgggcacattgaaagaagcaggatatt  
tcgatgtttatgtgtatctttatacgtctgctttatcttactttcaaatattctgataaattgtcagagttataaaggattcatctttgtct  
aaggaaattgctttaccttgcttggtggattgattttatgttttttttccgctgtaataattctcgaagtgttgcattcatcgaaaagc  
aaattgaagtacgttgatttctgtaactgagtgtttagttgttgacatcatcgtttggtgtatctatggttccagattggctcgctttctc  
ttaggaagagatttccgtacttctggagaaaattatactgcctttgacaatcattttcggttatacaactaatcaagctttgggattgattcaga  
ttcaacaataaccgttgaactgacgagctagaagctagtgtagactccaacatctgcacctaacatgttgaagtgtcaagttcctccttggg  
aaaagcctaccaaaagcaaatcattcaaaaaagctgttgggacattctgcaagagagcaagaaatagagttgcaaacctttgggagacacaggt  
ctccgagttgaacgatcatacaaatgattttatgctatgccattttatgaaatggtgttattgtcagcgtgctagtgccatttgagattga  
gattgagatgtctacgagcagagacatgcttaattgttccgtagaaactcgggattgttagctagcctggccttattagcaactaacttctg  
ttgttttggctgtttccagtcactctgcttctccttttcatgaaagttgtttaaatacaatacaacatattgtttctataagctttgaccga  
aaggtgaaatcgtagttatgatggtgagtttgcacaaaagtaacacataaccaaggattctattgaaactgcaaatcatgaattgttactttt  
catttgaagaattgatttaaggtgctaaaaatgtatatccgttttaaacaccttgactttgttcttaactataaatgctgcttttctctgcac  
tttaccacaaaaaaagtttgcattggaacagtaaaaaactaaatctgcaattgacatgcaacctatgagattaacggttcacgagaataa  
acctatcagaatcaagaaatcaaaaaaaagctgatgagagaacaaaagatgattaccattcaaaaacaccgtataccaatcatgaatac  
cgaatatcgatatgagataggaattatgatgaccatcaggagttgacaataaaatagattgcgtaactatatacaaaagacctatataagc  
tgttgtctacagtcagaatctcagattgaaagattcgactagtggtgataatgaacatcatctacaaacttcatttagttaccagatcctggac  
gttatagctcctaaatgtaatacaaccaagtgcaattcaaaaaagtatacaactaaagttgtttattacactcgatttacattctcataacgtgt  
gagattattcgtgaccagcggcgtattctaagaacaataatcttaacaaatcttctgtaataccgacaccagcacaccgcccagcatcat  
caatgctgtaacactcgttaacctcgaagctgaagacatccctaattccacttatctttcgcctcgcaactcaataaacaacaaaaa  
actaccaacacctttcattgtgaccaatagttgctacacacttgccttctgctgaccctttcaagaatgagtaagatttttacgaaccattt  
ggaattcctccacatctgatgattctgatgcttcttaagccgtttcatagctgaattctcacaggcattcccaggatcagttgattcgtttaga  
agcaagttgacgagccttcatgaagcagttgcatccaaactcggaggagactcgtccacaagataacatgtctgaaattcgtgggatgcttca  
agctctttaccagaaggttaataatctagaagatggacaatctagcctcaagaagatattgattcaaggacaaaatagcatcgtgcaactttat  
ctatgttgaaggacgattcgacacttttctatcagttttatgcccctaacggtgaacaattatcacgcatcagaacgttgaacaaaaactaa  
cgaacaaggacctcagcagagatctgaaaacattatcaacagagagcttataaggatacaaacgcttccatttattaatggacaagaa  
cctccttaactcgcctgagttaaaaactatttccgatgttataactgaaatcaagccagttgaaaacatatctggagggataggtgttaagt  
atgttgagaatgagcctcaaacgtctctcaaaagaaaagttcagatgtggctggattatcaaatgtcctcatgataatctttacgagttttcaac  
cctccaggacataggaaatcaaagtagtacacaaatcgaatactcagatctcgtcataattgatggatgacacaaattgaaagcttttc  
gtttcattttactctgaagttatctgagatcctggactgtgcattacaataagcagagtgccgtggctgatgtgaaggctcagagattcaactgt  
tctattttaattttattttatttgccttaataattttcattatggtctaaaaaaaagaccattaacgcttgaattaaagaatactttgtcta  
atttcccagttctctgaaattgagcattatgtttatcattgttgattataagtgcaacctatacaaacgttacaattattggataaagtagata  
aagtagctgaattcatcgttcaaaaacagctgtttttggtcctttctctgcaaaaatgaagaaattggtcttcaaaaacaaaagcaatgaa  
taacaaagaaaatcttgaacaaaatatttctggatgaaaataatattaaatgaatgtgtagtaccagagattcgtgtatattcaaaatc  
ttctcttctgtcattcattacggtgaaatagacaggtttctgagaggagatctctatattacgattcccgcgtacatccagagtggaatggt  
cctcttggtagtagtaagcaaggggctaggccaaagtaccttctgcataacctcaagcagactggtaatgtgggagtagcagatgatgaga  
cttaattgaagaggaagttccaaggctgatattgtcttctcattctgctgtagtgatgaacatataccatcggaagagcaatcgttcgaggctg

agtcgtcgccaagccaagaatcctgcctactatattcatacttctggcgcattggctctcgcggaagagactttattcaccagaatggagagtgtt  
tgacacgattttacgacgattaggatcatgtagaggattgacctcacttccagatcatccatcgcaaggtagataaagttgccattgtcgtccgg  
ctgtcatctatggcataggtcggggaccggataagaagaactgttccgctatttgagtttttcaaacacaaatagatctttgtggttgaaa  
agggtgataacattggcataatccatctgcagaatthaagcaagctctactggcagaagctgctgtgaatgggtgtgaactgcccact  
tgaaacgaaaagggtattacctgacagaaagtggtttttatgtgaattgcgacatgctgcggttggtgctgaaatattgcataagaaaggctt  
attccaccgccaggtattgaatacatgactacagagaaagcgaaaggatatccaatgactgaaaataatagtggtgttagattccaaagggt  
ttgctattcgtggaaggaagctactaggctgggaaccaacatgccaagctttaaagcagagctcgagaatgctttggatacgaacacactgca  
attcgacctgctagaaggtattaaaaccttgataaaatccatcctaaatctacacaatctgggctccatattctnnnnnnnnnnnnnnnn  
nnnnnnnnnnnnnnnnnnnnnnnnnnnnnnnnnnnnnnnnnnnnnnnnnnnnnnnnnnnnnnnnnnnnnnnnnnnnnnnnnnnnnn  
nnnnnnntgctgtgaatgggtgtgaactgcccactgaaacgaaaaagggtattacctgacagaaagtggtttttatgtgaattgcgacatgctg  
cggttggtgctgaaatattgcataagaaaggcttattccaccgccaggtattgaatacatgactacagagaaagcgaaaggatatccaatg  
actgaaaataatagtggtgttagattccaaagggttctattcgtggaaggaagctactaggctgggaaccaacatgccaagctttaaagcag  
agctcgagaatgctttggatacgaacacactgcaattcgacctgctagaaggtattaaaaccttgataaaatccatcctaaatctacacaat  
ctgggctccatatttctcgagatgctctacctaattctaacattcggggacctgacctgctattgtgtaactatctttgcaggattctctctacc  
ttgttcttctttttatgaaggtatagcctgctgctttttgagaggcatggaccttgcactaaggtgataactaaagcggaaagcaaaaaagcaat  
ggttatccttgaatcaataaattcttattagctctttaaacaataaaaaagaatcaggaattaagggtctagaagaataaataacaacc  
aacatgtgaattagaagaaccaactagagagtcaacgatccatcatcccacgacgacctcacttcttctgctcaagccgcaaagccacg  
atggaaccaatagagcttaacaacaacggcctatgaaatgtgtttatgcaaaagctcaacggaaataaatacaacgggaaacgaaagaaa  
caaaataaacatttaaagaaaacacaagcctgcatagagaataatgaaaagacaggacatcatcataagaatggttcaagcatgagattcg  
ttccagtgcttcagcatccctagcctgactcggtttgtgatgctcctggatgttctcaaacattcagatgatggttgcggcagtagattatca  
ctacgattgttgattgattttcagaccctgctggcataggttttagtgggatccagttaccatccgctcgagtcgtttcttccgacgacatcctgaaa  
ccaagagcagcaataatacaagaagcaatcccagaagcaatccaaggaatccaagaagcaatcccagaagcactaaagcaataaaatcca  
gcaacactataagtagccattagtaaaactataaaatcaaaatccaccattccacttacgtgaaaaaacaacaagaacatgtagaaagccg  
cgatgacaagaacaatcgctagagcaatctgaaaccgtaaccctacaaacttttcatcgattcctttataaaggggacaagaaaaagtaaga  
aaagaaaaagccaatagattgaaccaataaagcaccacaaagccggagagcttattctcctgtctcggttgcttcaggaaattctcgaa  
ttttccggccagaaaactagagacggtaatgcatgaagagactccttaattgcatgaaagaattcgttattgattcgaaggaaagggttagtc  
gcatgtttatggaagattctttgtttctgggtacgatggagctggatcagaatgtaacataagcaaccttttccatctcgtccagatgtgaatag  
gagttttcgtgtatttcggcaaaaagctgtcagaactacagaagagctcaagcaaaaagatttggttcttcgacgctctagctgaatttctt  
ttcttttctgacatttttcttagaataagatcatctgtcaccaatcgatgggttaggactgactgtgaactagagaattacgacgtagtagaag  
ggtcaaaaaggcatgcaatttctgataagcgcctaaattaactgacctaaagaaaaaacgaaaagccgagaaaaaccataaaaaaccg  
agaaatgagtcgcaatggcgataaccagagttttgagaggtgaagtaaggctttcaagtttcgattccttcggtatccttcgctaaactatt  
acgttactaaaaataccgctatttctgatgtataccgtcacctctccaagtgacagtggttcttacgagtagcactgcttgtttatgtgtct  
agcaaaaaaaagaaaaagaaataaaaagtaattctccagttataacatgattcatcatttagtgccattgtactttgcaaagcttacagaaaa  
gagacttgtaaaagattaaatgttttactcttcttaccacttaatttttttactttctattttcagctttacccttataaagttcagtgatg  
acaatccagctgaaacgagtgagctattttggaatgaatgcacctctgtttaaagcaatcgcttaattagatttaacttctattataaactca  
tctttatcgagagctgctgtaatttttctacaagctcaaaatacacagtcgcatatctgtctttttatctataaattgtttttttttaaacat  
gtaacaaactgcaattgttcactgctgtgttaacattccagtaacttcaataaaaggagatacatttttgattaccaactgttattactcgt  
aacgtcgtaacatacacaacgtaagacgagtaagtttttttttttttttttttttttttttttttttttttttttttttttttttttttt  
tgactatatacatatacataaggttttttttttcaatacattcatgggtaataaagaatccctttttataatataattaaggggaac  
aaaaaattgtaagctgtgctgaattatggtagtgacagtttccaagtggtcatgattaaaaaagtaacaacaataatcacttgaccgtaa  
attaactagattatattacagtccttttttagcgaccgcttctctgatgtggtggaactctccagctttgatggatccgcttctgctcagcag  
tatgaattcagttgcataagctagatttattacatccaaccgctctccactagtagagaaatgctctcaaaaacattataagtagctgtcttt  
gttgaggcaactcacttcatcaccagtgcaatgactcaagcagcactaatatggtcaactatttccagaaccaactgtacaatcgcactcca  
tgaagcgcagcaactttgtaacaaaacgaacgaggccattcacgaaggtccttgggttattactcaaatatgcatcctaagaatagcatccgt  
ttctgggagctgcatgcttctactacagccaaatgtccgtgctatcgtttcaagttcattgacgtacctagatcctttgctgctcaaatttcga  
aaaactcttttaattttcattggacgtgttttactgagtttgtaaaaaaccgtagatcatttcaatgaagtcagtaaatctgtagcaaaatga  
gaatcatcctttaaactgcatgtaattataaccaccagcggaaagcgaatgagcaaggtatacaagatccaatcaagccttttctgctccgct  
tgggaggctaaacttaaaagcgaattcactttatcaaaatgtctccagatacgaataaagagtgtaattaaattggctcaaatattgatcatat



atcctggttaacttttaccatccagaacctgttgcactctgccattactagatacaggaatgaaataaagcgtgtgctcggtgttttagaaagtattc  
tccaagacaaggactatctcgttgctgacaagtacacgatcgcgacatgtctttattaattggaacgatttgctacctgCGCTTTGGAAAAGG  
aaggcatgaattcaaagaagatcttccacaattggacttcgaaaaggagtccccaagacctatgctggcataaacgtcttactgagcgtccc  
cctgctgCGGACCATAGCGGAACGACAACAAGNNNNNNNNNNNNNNNNNNNNNNNNNNNNNNNNNNNNNNNNNNNNNNNNNNNNNNNN  
NNNNNNNNNNNNNNNNNNNNNNNNNNNNNNNNNNNNNNNNNNNNNNNNNNNNNNNNtggcacttgacagacagatacaacaaggaaa  
gaaagatttCGTGCCTCATGATCATCCAGGTACCATCATTGCTTCAGTATCTGTTTTCCAGTCTTCAGGTCAAGGTGCATTGGGGACAAGCAT  
CCTGTTAACTTTACCATCCAGAACCTGTGCACTGCCATTACTAGATACAGGAATGAAATAAAGCGTGTGCTCGGTGTTTAGAAAAGTATTCTC  
CAAGACAAGGACTATCTGTTGCTGACAAGTACACGATCGCCGACATGTCTTTATAATTGGAACGATTGCTACCTGCGCTTTGGAAAAGGAA  
GGCATGAATCAAAGAAGATCTTCCACAATTGGACTTCGAAAAGGAGTTCCCAAGACCTATGCTGGCATAAACGTCTTACTGAGCGTCCC  
GTCTGCTGCGACCATAGCGGAACGACAACAAGCTTCAACAGTAAGGCAATCAGGAAGCAAGCTTAAATCAGGGAATTTCCATCCGAAATTAAT  
TTCTTTTATAGTTACTAGGTTTTAGAAATCGGTACAATAAATGACCTTTTACTGTTCCCTAGTAAGTCCAAAATTAGACATGACCATTAGCT  
CTTAAAACAAGTCTGTAGGATGAATAAAGTGTATGTAATACATCTTAACAACCTAGAACGCGAAATAAAAAGAGACGTATAATAATC  
GAAAAATTGAAAATCATTGCGGTTGGTAAATCAATTCGCGTGCACAGGTAAGTAAAGTAAAGATCTTTTTAACTTTATTTTCGGATACG  
CATATTCATCCTTCGAATGTTTTATGCGCGGCTGAATGAAATAAGTTCATTCTTATGGTGCCACCAATTGAGCTAATCCGTAGGCGCAGTAAGGA  
CTGAGTTTTTTTTGGCATCATTGTCATCGTATCCCAATGAAATGTAAATCCACATTACGTTTACCCCATAGATCATATATTAGATCCTAGG  
TATTGGATATTATCAAGTGGAACGCGATGACTGGACCATAGTGTTCGAACCAGAAATGCAACTGAGCTTTTCTAGCGCTGTGTTGCTTC  
AGCGATAATTAGACGAAATTCGGAATGATAAAAATGAAATTCAAATTCGACATGTAATATTCGTATAAAGATAGGACATCTTGGTGTTA  
ATATTGATTTATCCACAAAGTACCTTACCATATTTTTATATCTTTCTAATTTTCAATTCCACAATTTGGTAGTAAACGAAAAATGCGCACGT  
ATTTGATCAGCCTTGTGTTGATGGCTCTGGGAGTTTTCTGCTATCCCATGGGCTATCGTAAAGGAAATGCTTCTGCAGTAGCTTCAAGAGA  
GAGACTCCAGCCTATGCTGAAGGGGATCCGAAGGTGCTGCTGGGGTCTGGTTCAAACGGGATAACAGTACCTCGGCTACACCATTTGTT  
GAGGGTAGCATGGAAGCTCCACTTCTGTTCTTTTCAAGAGAGAGACTCCAAAACCTATTGCTGAAGGGGATCCGAAGGTGTGTCTGGGGT  
GCTGGTTCAAACGGGATAACAGTACCTCGGCTACACCATTTGTTAGGGTGCAGTTGGAGGCTCGCTTCTGGTGTGTTTTCAAAGGGCCTCTC  
CTACACCTATTGTAGAGGGTAGTGTGAGGGCAGTGTCTGCGCTGTATTAGAGGGGATAATGCCACATCCCTACTCTCACTCAGGTGCGAAT  
TCTTATAATACCATAGCTGATAACTGGTGCCAATAGCAAGTATCTTACCAGTAAACCATGCTGCTTCTCATCCGGGTCAATGCCAGTAGAGCT  
GTTCTCTTGTAGTAAAGTAAAGTTTTGATCCTCTGCAACGTGCTTCTTCTTTTCCAGTTATAAATTAATTTTTATTGGTCTACCTCAG  
TTGGTACACCTTCTCTAATTTGTTTCTATTATTTTTTTGGTTTTACTATTTGATGACATATTTTTTACTACAGGTATAAGTCAAGTTGCTC  
AGATGTAGGTTATATAGCAGCAACATATGTTGTAAGTACTGAGCTATAACGGAAGAATGTGTTGAGCGACTGCAGGCTAGCAATGTTATGA  
ATATATCTGCGCAGGAGGAGAATACTACGACAGATGTTTTGAGTGCATCATGAAGCATTGAAACGATAGCACGTGAGAGATTCACTTTATT  
ATCCTTTAATCAATTTCTTATACGATAACTGCAATGAATAAATCATAGTAGATCAAGCGCACGTAGAAATAAGTGGTAAGAAAGAGAAT  
CAACAATGCAAAATTTCTGTAGAAATTTGCACCTTGACGTCATAAAAGTCCAGTTACACTATTTAAAATATATTTTCATGGTGGTACTTTT  
TTGTTGGTATTTCTGCTTAGCACTCAGTAGTTTGCAACCAGAACTTTCTGTGTCATCCTCAATGTATATAATGAGCATTGCTATGATATATCTC  
TTGTGACAACCGGATTCATCAATATATATTAATATTGTCCTCATGAGTCTACTTTTTACTTCAGGAAGTACTACTTTTCTTTATAGATG  
GGTGGCGAAAATGTGGCTGTCAGAAATTTTTAATATATTATAGCATGTCATTACTCTTATATGACAAATGCAAAATTTCAAATTTGGGCTAAAT  
AAGCTACGGCCAGACATGCTTAATATTCAGAAGTGTGTACAGTCGACCTGGAAATGAGTAAATCTTTAATTATTAGTTCATGAAAGACA  
ACCCTACTATTGACAACCTCATCAAAACATCCACTCACCTTTTCAACATTAATATTCCGAATCCTTAGAACAACCAAGTTATATATCTAG  
GTCTTATCTGTATATTAGAGGTTGAGTACGTAACCGTAACGTTTTCTGGATGATTGGAATAAGCGACATTTTTGGTTCATCAAAATGTCAT  
TGAGTTGGTAAGGATGAAGGATCAATCCTCAATGTTCTTGAACCGTCTTCCGAAAGTCAATAGTGTGTTCCCTGGTCAAGCAATTTCTGA  
ACAATTATGTTTCTCAAAGCACATCGGAGATTTTACTGACTCAGTACCAAGAACCTACAACCTGGTTCCTTGGAAATGTATAAGTGT  
CCATGAGGATCAAGCTAATACACTAAAAGAGAAGAACAGACTTTGCAAAATTTGACATCGTAACAACCAATTGATATATTCTTTT  
AACGTCATTTTGGTGTGCTGTGAGTTGGAAAATGTCGTCAAACCTCAAACCTTATTTTCACTTCTTTGGTTTTTATGTACAA  
TATGAACTATTGATATACCATTTGAATTTATCCTGGATTATTTTCAAAAAAAGTGTGCTATTGCTTCTTAAATTGCTATGAGCATTACC  
TTTCAGATATTTGGCAAAGTCTGGAACGTTACTTACTAGTTTTACTTTATATGTTAAGGATTTCTCGGAAACCAATTGCTGAATGAGTTTA  
GATAGAGTTATAATAAATGTTTTACTGGCCTCTGATTTCCGGTGCTCTTATGAATTTCTTTTCTGAAAGGTTGCCCTAGTGAATGAATCTT  
CTACTAATGGTGGTATCATAATTGCAATGCATTTGGGTTAAGGAACAATTTCTGGATTTCTGGATCTTCTCTAAAATTTGGACTGAAGGACTT  
TCACTTCTTTTTTATAACTTATGTTGCTGAAGCAATGAAATAGTTGAAAGACAACCTTTCTGCTGATTTTCAAGTGTCTGTTATGTT  
AAATCTTTTAGATTTCTGTCTTTCTTAAATTTGCGGCAAAGCGTTTTGATGAATTACTAAATAATAACTTCCGTTTTATGATCAACAAGAC  
TTTTATTTCATGAAAAGATAATCGTGTATATTGATTTGTTGACACTAATCCGTGAAGTTGAAATCTTCAAAGTTGATTACAGATATTTGATA  
CTGTTATTTTTTTTTTTTTTTTTTTTTTATGTTGCTTAATATCAATGTCCACAGCAGTTTCTGTTTTATTGCTACCTATTTTCAATGAACCTTTGT

tactgtagttgattgtagatttctgtttagtaataactaagtaatagcaactgttcagtgagcaaatgagtagcattaacatggcaatcaggaa  
gcaagtactacaagagcagccaaacgacttttgggaaaaatagaacataatacaaaaaagtaaagagaagcctacagcaccgccgattc  
ccatgttctccaacatagtaacgagggccctcagacggtttcactttactgtagtgatcgagcgggaactgggttttgcctaggtgtggc  
cgtagacgtattttgttaaatgttaaaaaataaagctaaatacttagctctgctcgcggttttctacgacatttagtgttctttgtgtataat  
actacaaagtttattgtttgaatcaacataaacgaaccaacaattggaaatagaactcataatcaaaataattaaattggtaataaaa  
taacaacgaatcttaagtgtcaaatgagaatatattttgtaggtattccagctaaatcttcagttacgaagattttgctgtgagctgataaa  
ctgtttcacacattttcatcagcatcattagaaccattactatagataataccacttcagatacttgtaactattctcaattaaatctcaaaact  
tacgaattacatattgtatttcatttataataaattaccgatgctgaaggtttgaagtgcatttaataatagatagatatgcagaaactgaaa  
gtaaagaacgaagtcaagagtaaaagcacgtataagaactagcaagcaattaacgattaatgaaaatggaaagtaagaacatcaaaaaag  
aaaataatcgaaaaatagtagtctcatgacgctgtgcttcatcaaaacaacgtttagaacgttccaactcaactattatgataagctc  
aaccactcactcagcgtcactctgttcaaatattggatgaattcctccaagtttacaagcttgaggaatcgttcattctgtttcaatacaagact  
ggccacgtttgaagaataaggaataagaactataaaaaacgagattccactagcagcatagaaatacctttgcaattgggtcacctccaaa  
caaataaatacctgctatagatccaagtcgtccagtcgtcactgcaatcccgaatagaggccccggattgagtggtgaaagtctttgatgctag  
aagtctaattgtacatttagcccaaaactcaccatactcaaaaaagccataaagcacgcaaaatccagcaaccttgggactaattgatggt  
aaaaccagacataaaaaatccaatcattcttgcagggatgctcctaataaaggcagacttgggccaagcacatcgctgaaatagcaccg  
agaagtgatcctggaagctaaatgattgggtcagcaccgtccatcaaacgttccatggaagcattatggggaatattactccttaag  
attgtactagagtacagaaaaacgagatatgattaaaccgttcgaaaccagatcatcgaaagcaaaaatagtcgtatccatacatctaat  
agcgagaagccaaggaatTTTTTgcagaaaccgggtgagagacatattttaaactcctcatacgaattcgtaatcaaaaagacaattgg  
aataaaaaataccacagcctatcgaaagtcgccatactattctaagatgctttgccaaaaatacaagccaaaataaaggattaaaggtccta  
aaatgtgtccatacaagtagcagtgctcagttactattcaaaagatcgcatggcgggcaccagattgaactcatttgagcttcagaagccgaaa  
tcgagccacaaacaactcagcacaatccgattcctaaaaaaaacggtaagctatcaacgcttgagcattccacgaatgcttccatgataa  
ccgtaggcactgaacacaaagctgtagatgcaactaaacagctgatgatgcaatcatgccaatTTTgcgccaagcgcactgaaaagattcc  
aaaaaagagttgtccgacaatcgtaccgacatgaaatcatgctaattTTTTatagtagatgctttgttctttgggttaaagttcttaag  
aatagtaatcaccgtccaatactgctcatgtagtaccatctgataaaagagccgtaccgcaaacctgctacctgcacgtattgcttccatgattg  
tggggattttcgcttctgatgttcccttacagtcggtttattatccacattttagatgggtcctaatcgctcttactttgtgtatccagttgggaatc  
tgaagcactagaatattcaccggtccaagtgccaatctttgtttcaccataacgagtcaggaataatgtacaataaaaaataaaaaa  
aacaagaacaaaaaagaaacgaaagaacgaaaaataaaaaataaaaaatagataaaaagagaaggctaagggtggtgaaaa  
tctggaagatttcccatttcataggtcaaatccgaatacacgtgatgttactgttcagaaatagccggataatTTTcggtaaacaatttaccga  
aatatacctttatgaatattataatctgataaacatgtttagtaaattgcattacttcagtcggtcccgaacggagtaactttctgtttggtgat  
aaactgataattgataattgtcatatgagaagaacaaaaagcaaatagttcatgaaagataaacctataaaaaactccctagactttatga  
atacaatgcaagcaaaagcgaatattagctagcttagcacaaccgtcctgaaggtaactttgtggatattctactaaagtagaaagagttaga  
aattaaaacaaaaatggagacaagtagaaggtaatcttagaatgcttcacaacataagcttgctctgccaactttacagaacatctctgtga  
ctgtttagtaacaaaaccgtgaaattgtacgagttgtacgagcgggaacaaacctgaacattagcaaacctttttcatcgacttttctacg  
aagctatctaaccggtgttgatgctgtaataaggctacatctgttcaagcaacagatccgtggttccgatagaagatccatggcatttagacatg  
gtgaattgaaagaggagtagaattcagcaaaagaggtaaatcagacataaactaaatcttatttagtaacttaaggtagtcctgatggtcctt  
gaaatccgtcaagtaagtctaagactgaaaaatattgtaacttaattataacaatcgttgtgattttgattctagatataattcgattggtgtaaac  
aagctgtagccagctccatgctttagacctgtatctatttggctcttgacattttggttgacttgggtttggatctctcctttgtcccttaa  
gtagtatttgaataggtgattgttatttcttactttgtataagcttcaaatggcggaggctgtgaaaaatattggactattgggtatcatat  
tttcttaggtattttggatgtaccctcttgagattccggtggtacattgagtgatataattcgatcctattcagcgtacatctccttccgggttt  
ctcgtttccggtatttaggcctcattatcagtccttctattgggtgacttattgttcagagctatctcgttggcgtggtttttggatcaatatgat  
ttgggcagcgggtgcttactcattttcttttgggtcctaaaaactgatggtcaagcaatcctttattataaggcaaaatattcggaaagcactt  
gtgattctgttactatacaattcatgagcgtcagcgcgacccccaaaaacgcaatcttcaggcagctaataggcagctcactctttgtactga  
acctattgtcgttggcttacccttacttactgtcgtttacgtcattaactaaatgaatttcaagcatalaccgatttttaggcataatacggttc  
aattatggtgatttaggtttgattattggagtcggtgttagcatgttattgtctggtctttgacgccaataactataaaataaatttcttggcctac  
aaactaaagatctgttatgtccctgaagatctgttgccttttctattggcgcctttgaccttctataatccatgttttgggtccatggactgct  
atgctggccatattcattggattgacctatgatagctagctactttttcggttcttagtcataatttttttttttttttctgtaaattaaatta  
tcgactcgtatcaacctcccagtcgcttctgagcaaccgtggtatgctattgcctagtgaggagtggtgactcgtctcgtccaatgatct  
gaatttgggtgatcattggaccactagtgacttacatggggcctattccgttcttctttatagatatggcaagcgtattcgtcttcgagcaagaa



cgctacaaaacgtaaatatctattccatttttacttattatatttcgtaaaggaatatacagcaaaattgaatattacaccgatgaatatttact  
tccaataagcttatttcttaggattagtgatccattaatTTTTTTctgatcaattgctacacgccataacatgagcattcattgttattccttttcgac  
cttttacagaaaagctgctatcaggaatcatacaaaggctctataaaacggacttaccaaatcttttctaagtttagagatacaatttttgtaa  
tgataaacaatgacaccgatgggtgaacgacgcacgcaccagtcataaacaattaaactttgtagatagtgatgaaattatgtaaaaaagct  
aacggatgatgaatccaatccgaaactatTTTaatccacagctcagctTTTTTaatctcaaaagcatccaacaagaaaaaaaaatgctagag  
cagtttctgtaatacagagtagaaggatTTTTcactccattcaataagagtaaaagccaattcagccggatctttcatgatccttcttttatttc  
ctaacgagtttctgttttgaattcccacatcgtctctttcagaatgttcgacattttgtcttccatcatcaccacagtagagggtatatacct  
ctagaaggaggagaagcgaagaatttgcaaattcggcgttcaatccgtcattgtgagtagcgttatcgttaaccagaattgagttcagtagagg  
gtaatacctttagaagaagaagcgaagaatttggtacttaccgttcaacgcgttactgtagcgcgctattgtaaccagcgggtgggtcagc  
agaagctccagactcccttcttcttggaagtcttatagattgctacataaaagcatttagtaatcgaaattttcatcactgttccatcagtac  
catcgtgctggaatctagcttctcctcaataatgtacggccaataattcattatataataaaatcaaaaaaaaaatgaaaaattcaaat  
tttattgattactaaatggcttccagaatttatatgatttttaaatgttgcaaaagattagaatgacacttatgacgtacatgacaccata  
gaggaaaacaagtaatggaggaaaataagaatgcaaaattcacaatgaaaaagaaaaacaaaagaggcaacaaggagagagaac  
ctatagaaccctgttcacatgttctccaaccacagtagataacgagactagatcctcggacacttaagtgaatgatcagatcggaattgggt  
gttcacctgtgttttctaaatagtactttcaaaagatgattttctacagcttctgccagttgtaaatattgctgaaagtaagctttacaata  
caatttctcgattgcttagcattatcctaattatgcaaaaagaaataaaaagattgttctgtaaaaataattttatgctaccttaattaact  
tttctttacatgtctaaaagtaatatattttatgtaataataactgttcctaagaggtagcatgttgcgggaatgtactaaaggtatcagat  
gccgttagcttcaacaagtgtaggtgtatagcgaatgcgcaaaaaagcctaaattgttgatgacagtttgccttagcaaaacttttaagtc  
attgcgtttcaattcgatttttggagctttatgaagtaattctttttttctgtagagtcacaacacatttctgttcttttctaccagctg  
gaccattttcagattcagctcgaacttttagtgtagtgaaaatatctgtgttttcttcttacgaatgagagaaaaagatgaagaaaaattc  
ctggaagctgttaaacaccgcaagtcttcttctgtgggagctgaaatgtaaccgacagtgatttaccgaaatacaacatccacagttcgtctcat  
ctggatgattggaaaaggtcaaaactgtgcaactattctgaactgggttcgggtatatcaatcaacaagtaataactgttgaagcaat  
gtaataagaacgaatagtttattggattgtagatttttcatggattcacttccctgttgggttctgaggtttcaagctgttctgtagggt  
tgattggattcgaataattgcctattttaggttagacatgacattgaagaaaccgagtcgacgagtgaaaaactccaatttatgtaa  
tacttctgaatcttaagttagcacaatagcttaataagcttagagatgaggaaccatcttgaatgtttgaacagtatatagcagcaacaca  
tctaggaatgggaaagcgttaaaaatctgcaagcagctaaacttttctttagatttctatgctagtaattttaccctgttctattttctaat  
tttgaaccgggatttctggttcttcttctcgttctgcgattgttttaattgttttttcaaaattttctatatttcttatgtatcgt  
ttctgcataattgatacctgaaatagctggcgttggattttctgcgtagctgtggcattcgttcttctccgctgcatcttttaattcgc  
ttgcacctgcatggcattcattaatcctcatgctaattagttcaactatttttttcttgaattcagatgttactcgttcttttctcctagc  
ggcctatagattgatgttttaattagtttaattgttgcatagtgattcctttattagtagcatttaccattggcatgatagtaaaaagcgcag  
ttaaatacttcaaaaaagaaagcaaaaaagggcctacagcacctggattctatgttctccaaccatagtagcaacgaggccatcaga  
cgttttacttaactgagtgattgaacgggaactggttttgcctaggtatggcctagacagttaacgagttcatttaacatattcatacga  
ataactaaagaattagatctatagcatcatgtcacaagcactgtctcattgtttcatttaattcattgcctatgacaaaactttttatctaca  
tgttggcctacttcttctgctatatacttccactctatactgctaaactgtgtatacaaaacaaagaggcagcaacttgaacgtcatctaat  
ataagcgaatgacaatgcaatgttgaataacaacacaagaatagaatagaaaaagcaaaacaatagagtagtaaaaataagaaa  
ttagaaaaagaaagctgttaaaaaattgacgaattatagatgaaaaagaattttgtacaagtttgattgttgaagtaattttttttt  
ggtactgaattatacttctggagtagctgattgttttatataaaatataatatacatatacattgaattgtcataggcgtcttagcttggagact  
ggatgaatgaaattgttgtgtgcttacttattgatttacttactccataatattatgagatctgtatagatttccgtgcagctctcggg  
gattactttagttatgcggtgcaaaacttacttagcagtggtgtcaaatgttacgtagctataaactgggtcaatgtgcttatccggtgcatgga  
gttattactaaagtcgattactacattcaagtaaccgatcggctcttaaatatataatataatataatataatattacattgattcaccaggat  
gtgattcaagatattaccctattacttttagacacccgatccgacaactataataatgtctgagaaatctgttttctccttgggtccaggctatattg  
gcggccagatattggaattccttctgcaaaagaaattaccatgtaacaacttgactcgcagggatccactgccgcaattccacgccagggt  
ataaagactgtgatcgggtctctggatgatagatccctcattcagaagcaagtctctgtagcagatattgtttccatacggcaacggccgaccct  
taccatcgtcagaagcattccttctgtagggctggaggagcgtgctaaaaacaactgcaaacgatttatccacaccagcgggtcaagcgtccta  
agcgaataagcgcgggagcgttcaagagcagatggttttgaagatgacaagcctgaagacatgacgcactccctgactctgcgcccgcac  
gcaccatagacctagcattgtgctgcgaggaagatcgtcggcaagcagcgtaaaattgcttattgatccccctctatttacggcgtcggtc  
tctctggcagattgtctatccagctcctaccttagtccggatgctaaagaagcagcgtacgcagggccaggttggagaaggccggtcagctgga  
gtcagattcatgtaaggacctagcgcgggggtatctgacactcctggattggttagagcggactccgcccaggagggtctcccgaaccatatt

ggttctgtgagaacggcaacgagttgtcatggaatgattgtcggcggaaattggacgcgtgcttcaccaggcgggtaagatcgagagttctact  
ccccggactattcctgtcagtaactacggggatcttttgggaagtggacagatgctgtggtaggacgaactcggaagcagggcaaatcgact  
acgaaagttgggtgggagcccaaggagaagaagacgttggcttcgctggccgaggatgaaattccttgattatgcaggagacgggtccattt  
gagggttatggaaaggttgttgcataaaattagatgtttgttctggattctggttaaactatagaattaaaatagtataaacgacagtcga  
ctatagagaattactatgattttcgttcataatctatcgttttatgctttcatgtctgaaaataaaaaaagggttctggcttataacgcaactaagc  
tggtaggtagtaacttttctgaaaattgaaaattactagagttcaccacttgtaaaaaatgaggaaagtatagaattaactttttgaaaatga  
cagaacatgtaaaaagaaaaagataaaattctagaactgaaaatgtaacactcaatgatactgttggaaagagtagttaaagggattca  
ctgtattggaacattttacaacaacgaattgtttcgtgaaattgaaatatttttaaaaaaagtagaataagcttgttgactgtatttctct  
agtagaagaagaggatttcgacgataaagtataaagtcgacttgacaaattacacacaagttgggggtggggccggggacctttgggttcaag  
tgtgtcaagtgc
