# Supplementary material for: Assembly of Schizosaccharomyces cryophilus chromosomes and their comparative genomic analyses revealed principles of genome evolution of the haploid fission yeasts
Source: PubMed Central journal article supplement (PMC6168568; doi:10.1038/s41598-018-32525-9), 2018-10-02
Supplement: 41598_2018_32525_MOESM5_ESM.pdf [file 41598_2018_32525_MOESM5_ESM.pdf]

## Supplementary Figures

# **Assembly of *Schizosaccharomyces cryophilus* chromosomes and their comparative genomic analyses revealed principles of genome evolution of the haploid fission yeasts**

Lajos Ács-Szabó, László Attila Papp, Zsuzsa Antunovics, Matthias Sipiczki and Ida Miklós

Department of Genetics and Applied Microbiology, Faculty of Science and Technology,  
University of Debrecen, Hungary

Correspondence: Ida Miklós, Department of Genetics and Applied Microbiology,  
Faculty of Science and Technology, University of Debrecen, 4032 Debrecen, Egyetem  
tér 1., Hungary

E-mail: [miklos.ida@science.unideb.hu](mailto:miklos.ida@science.unideb.hu)

Tel: +36-52-518-600/62056

**a**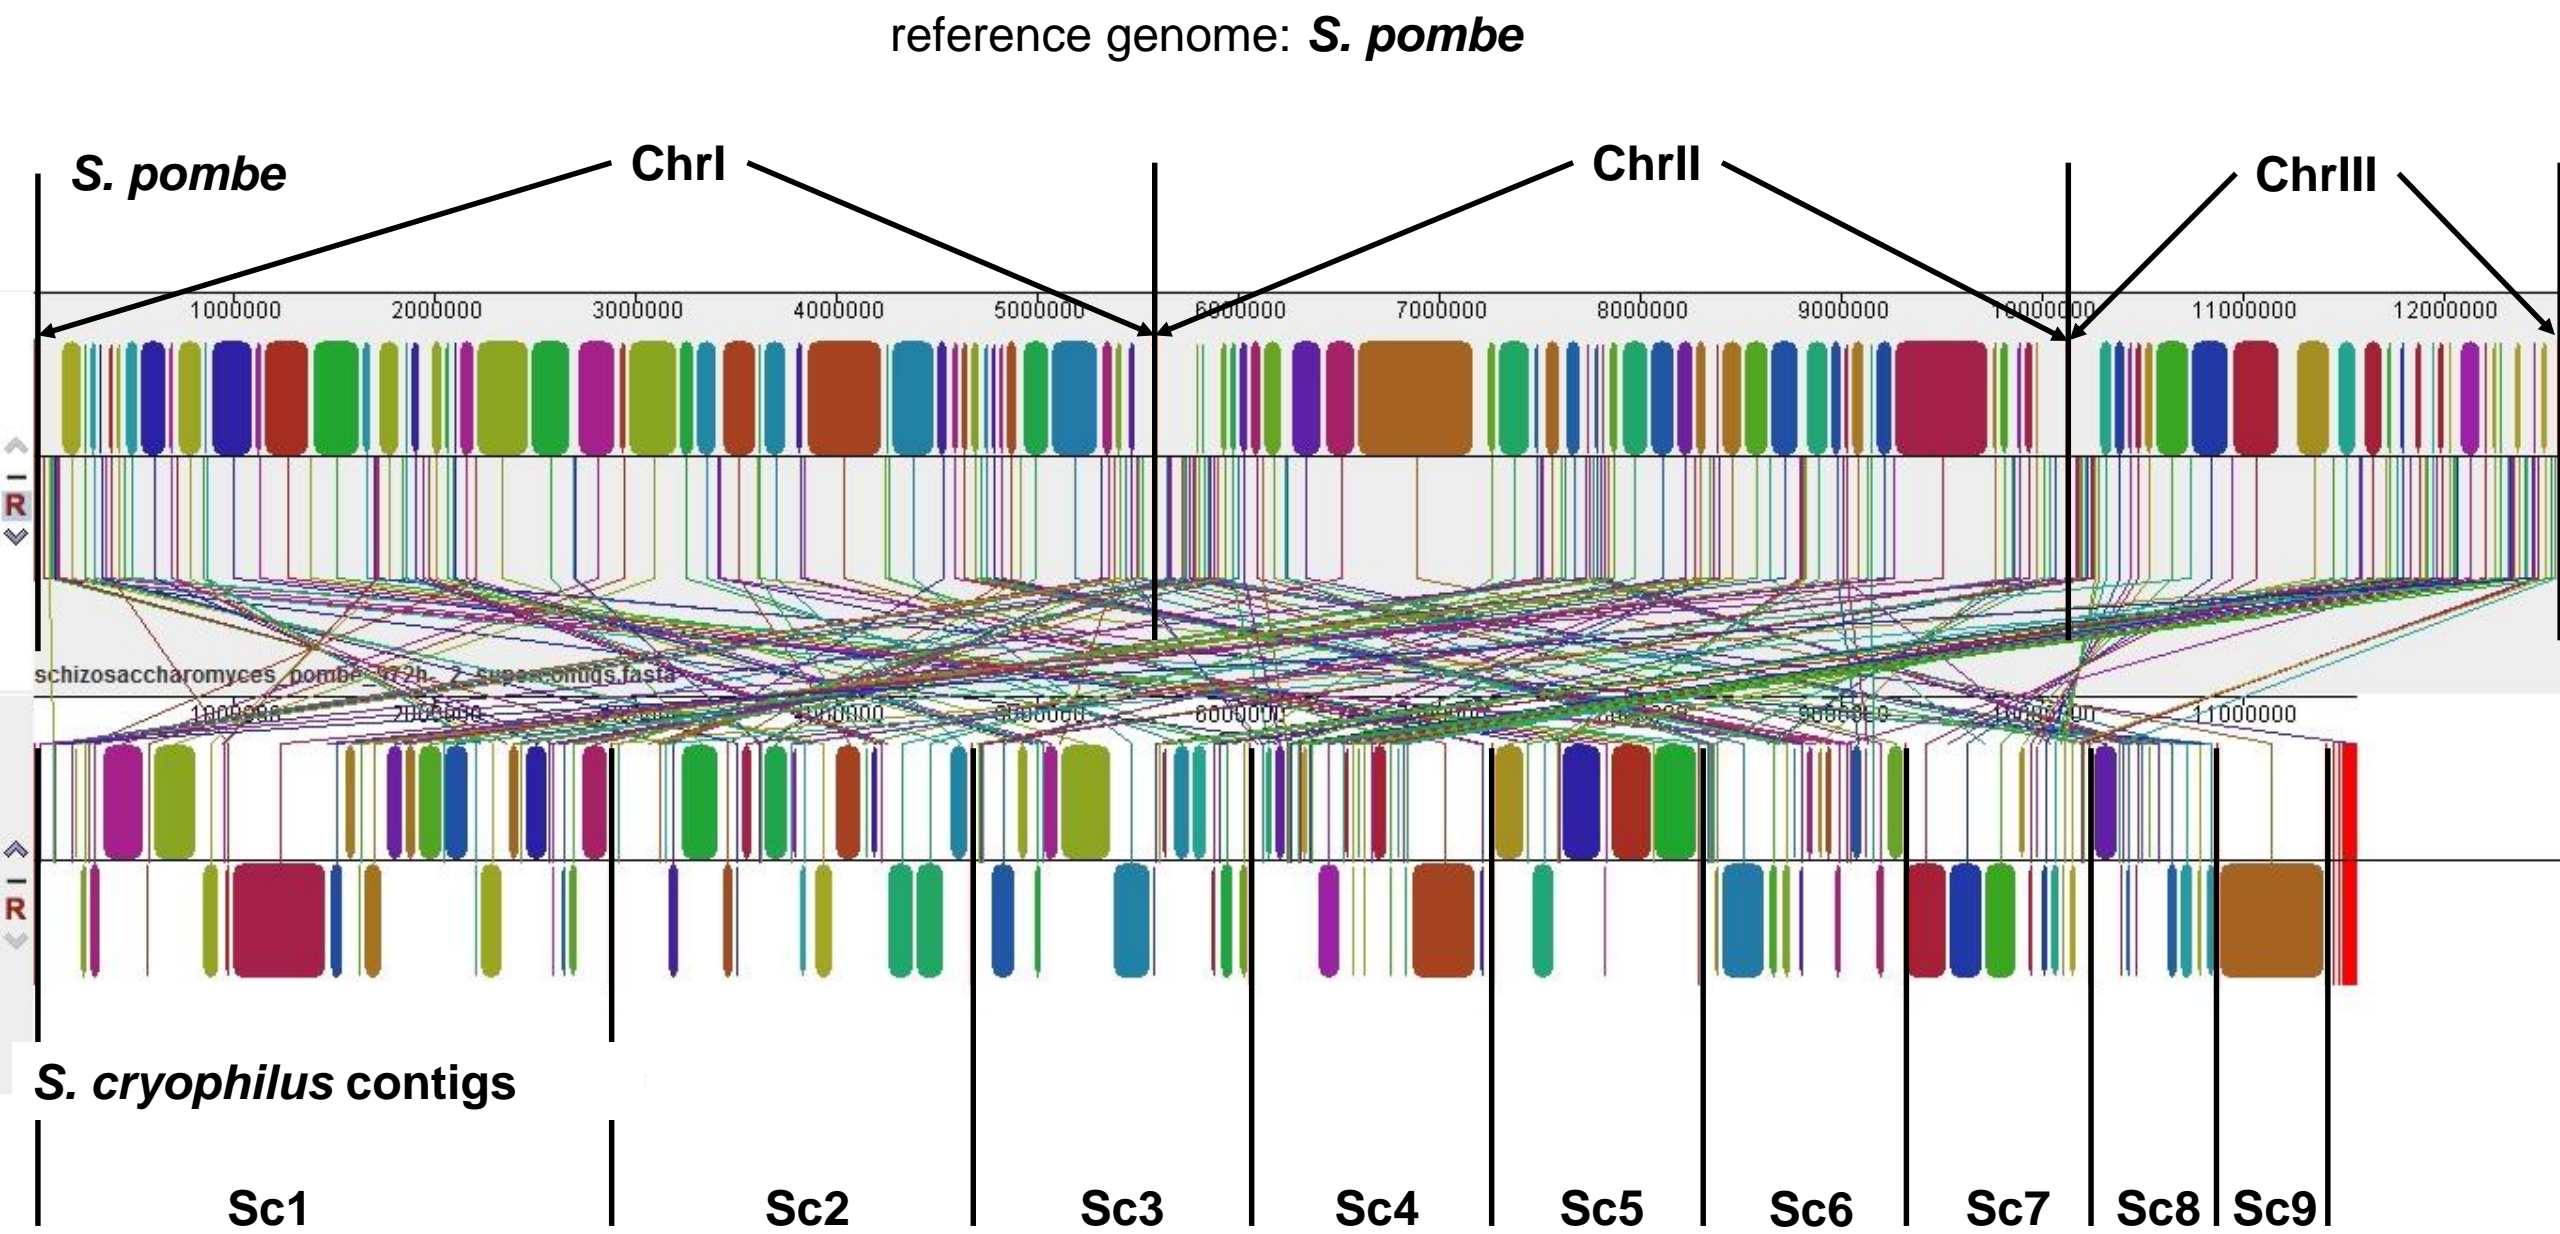

**b**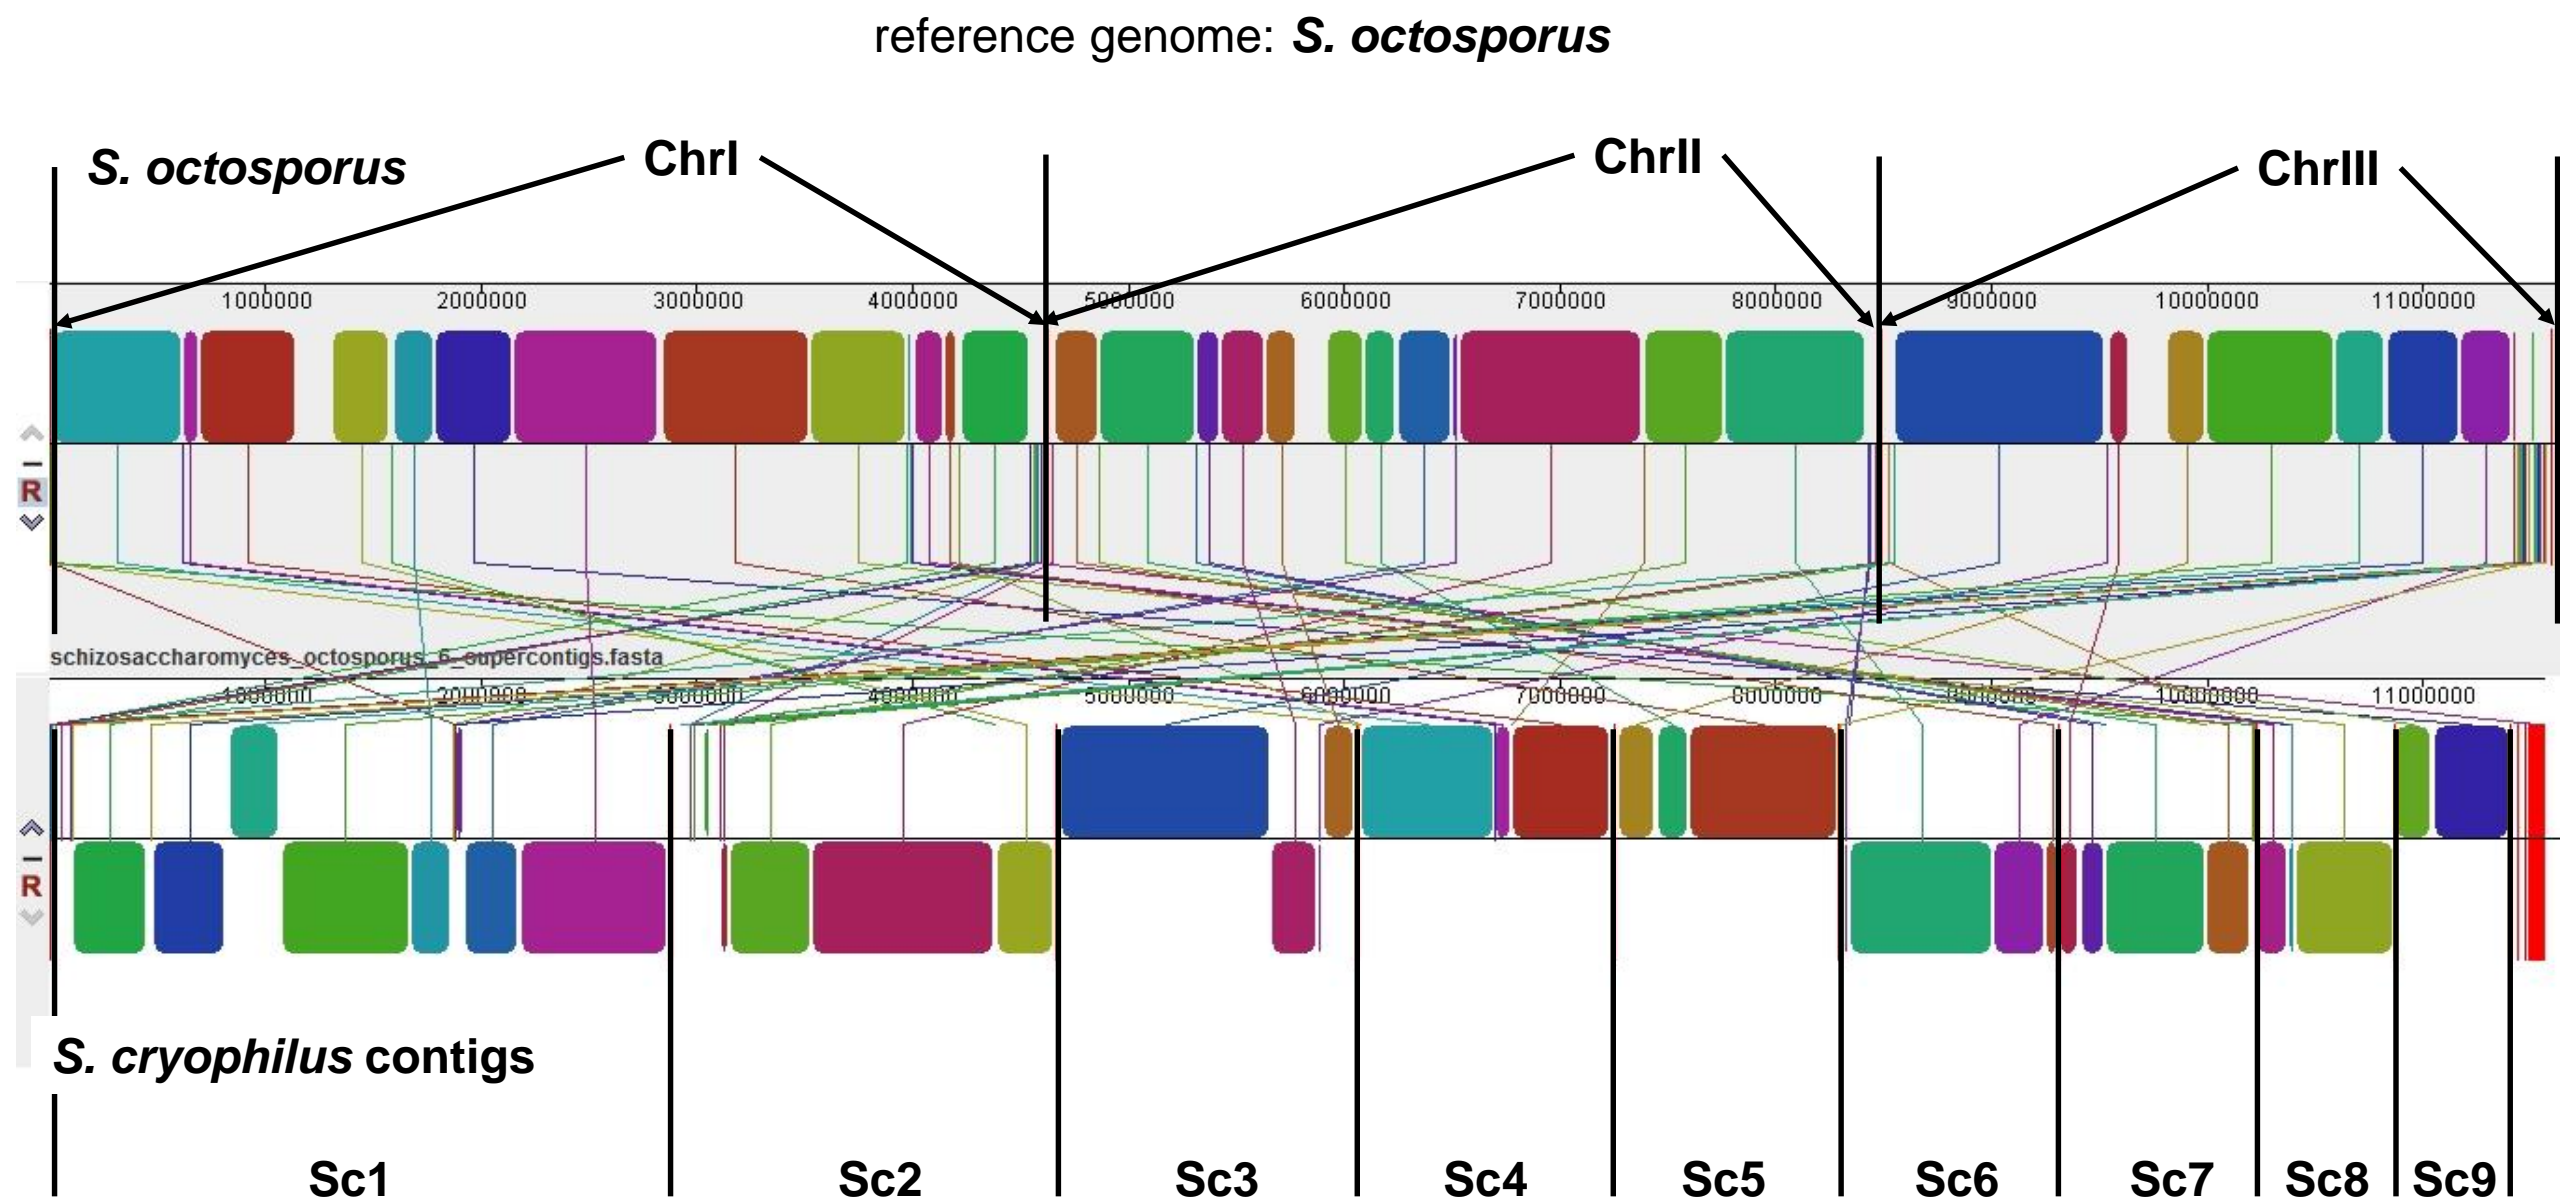

**C**reference genome: *S. pombe*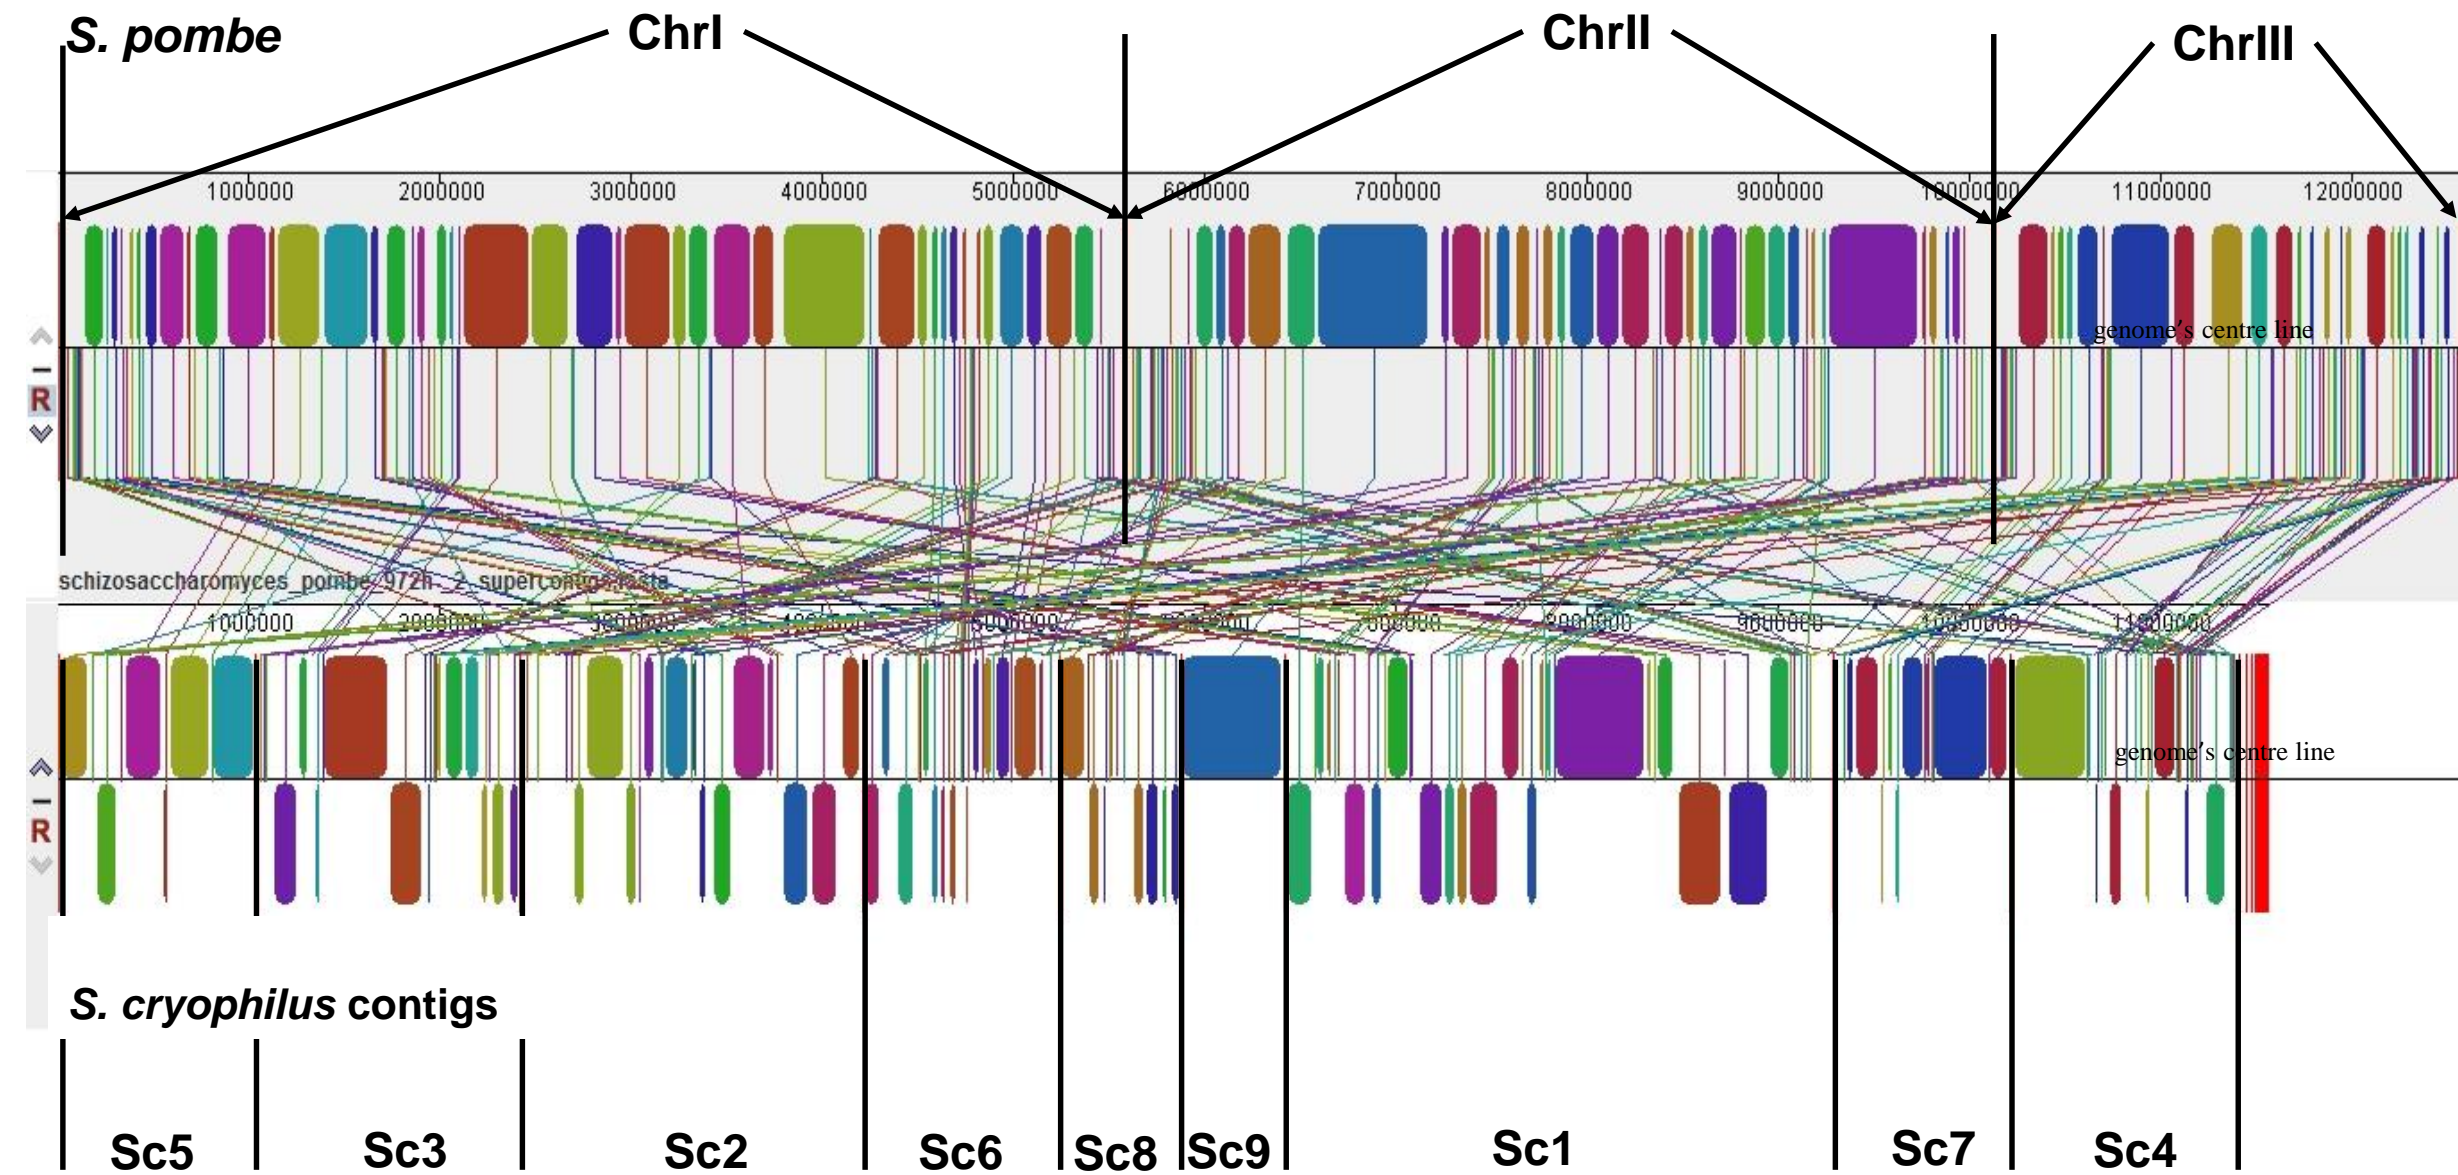

**d**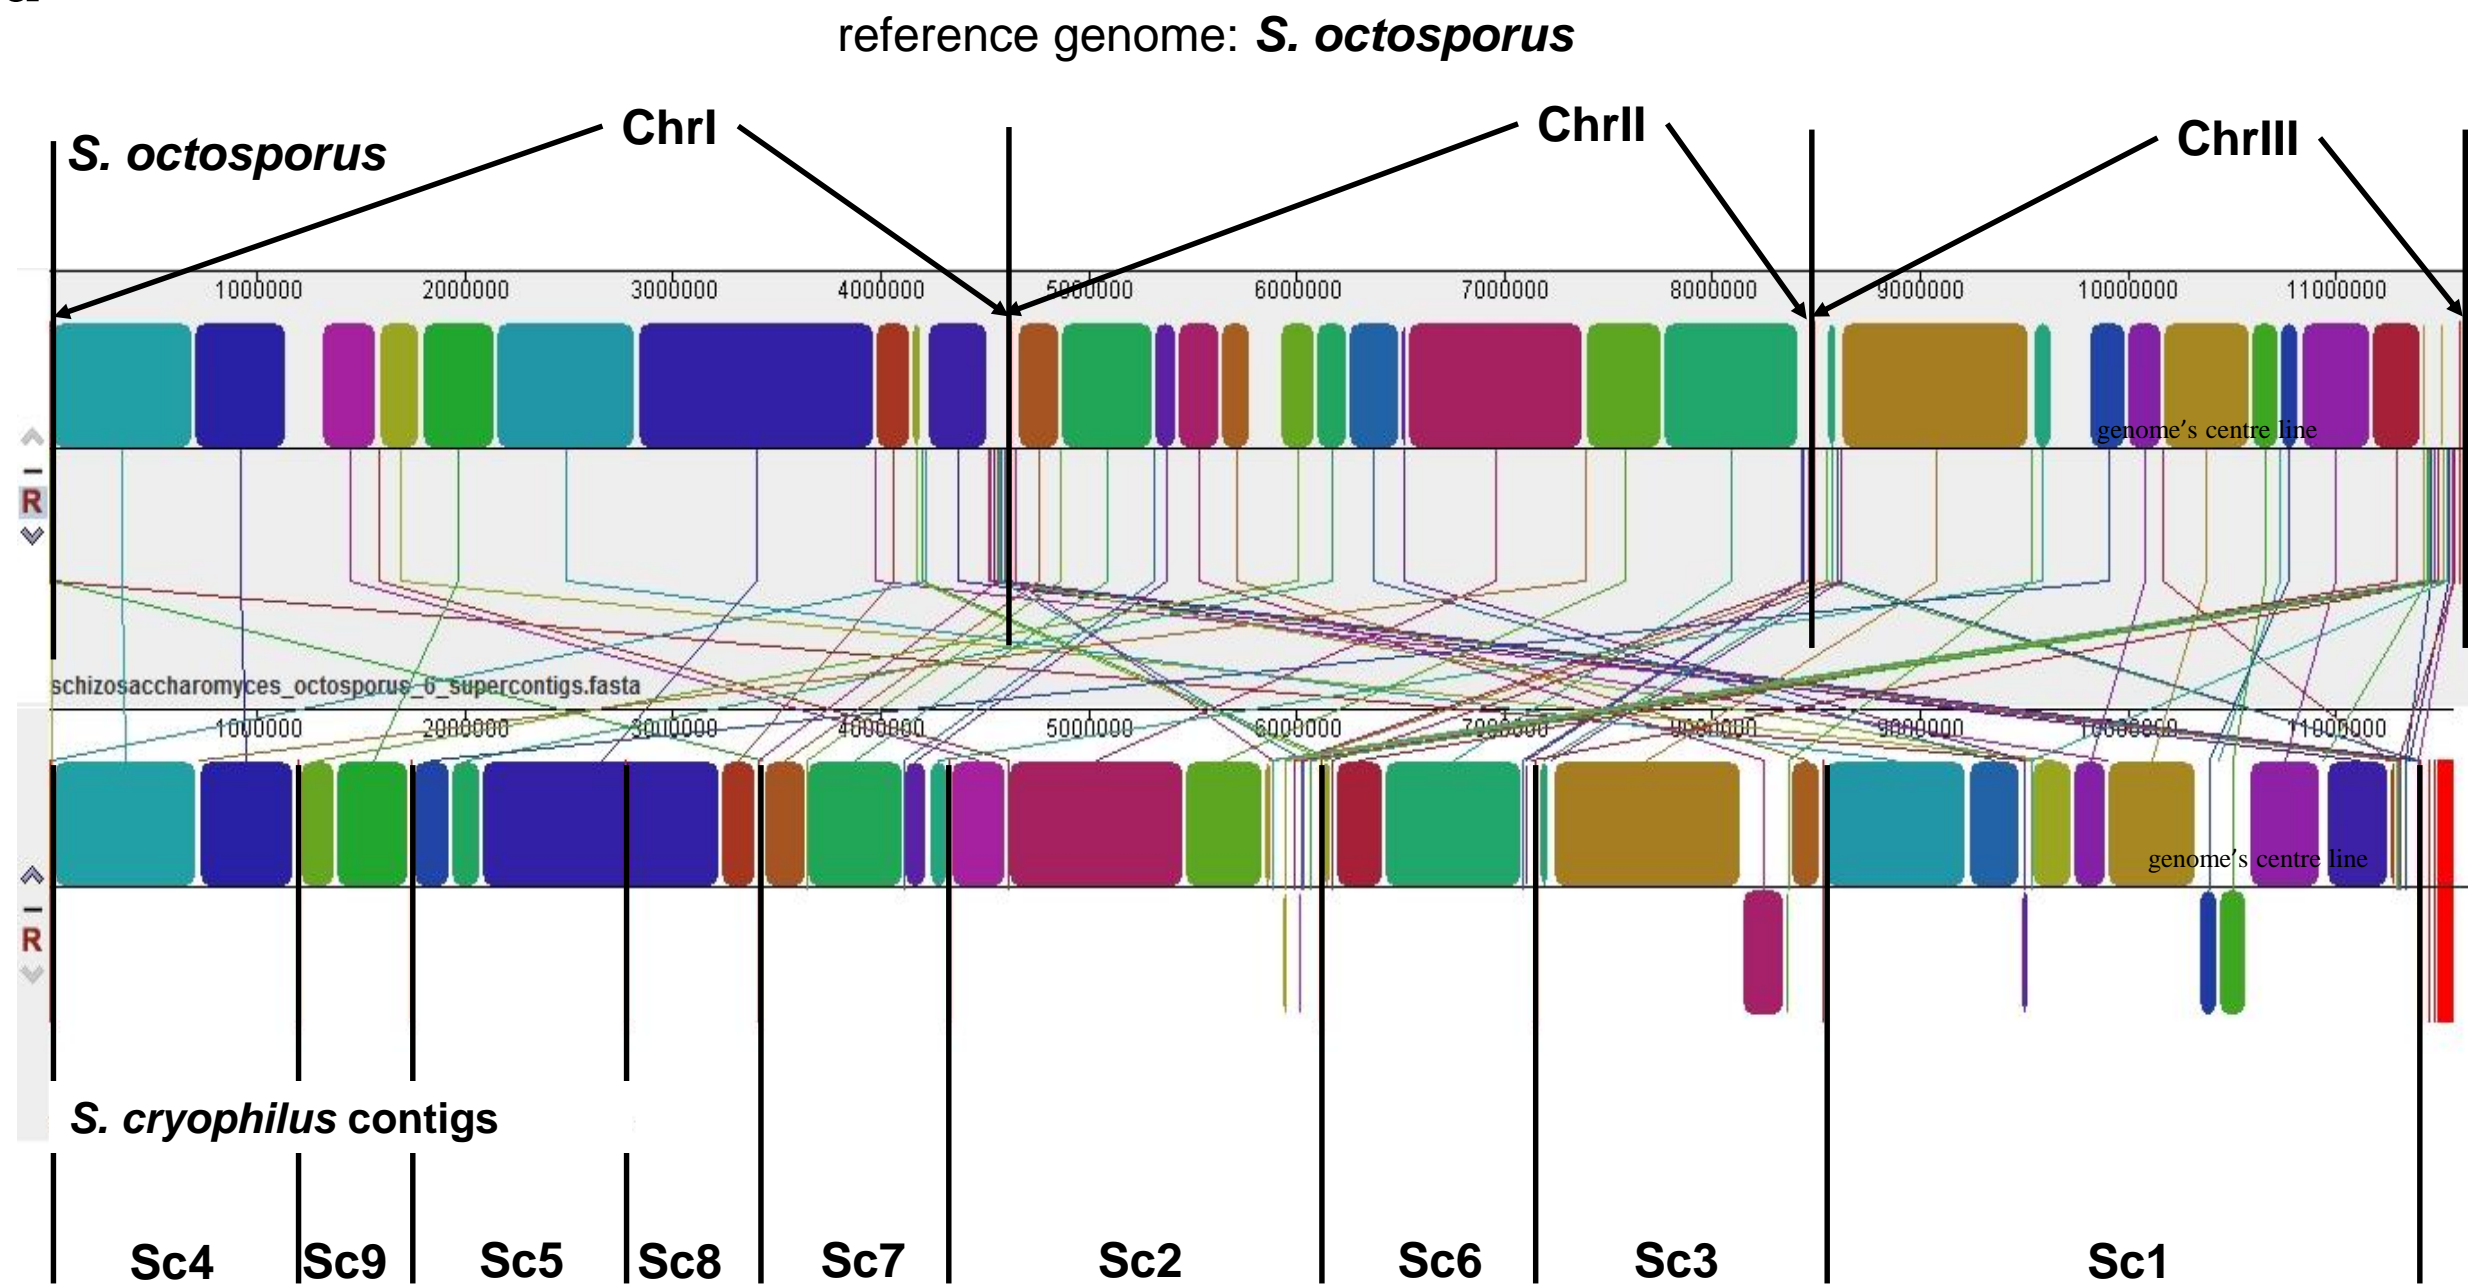

**Supplementary Figure S1.** Pairwise whole genome alignments with Mauve. Colourful rectangles represent locally collinear blocks (LCBs). Sizes of the rectangles refer to the genomic extensions of LCBs. LCBs below a genome's centre line are in inverted orientation relative to the reference genome. Vertical black lines indicate the chromosome/supercontig boundaries. **(a)** Alignment of *S. pombe* – *S. cryophilus* using *S. pombe* as reference. **(b)** Alignment of *S. octosporus* – *S. cryophilus* using *S. octosporus* as reference. **(c, d)** Reordering the contigs of *S. cryophilus* along the reference genomes using the synteny relationships.

# Supplementary Figure S2.

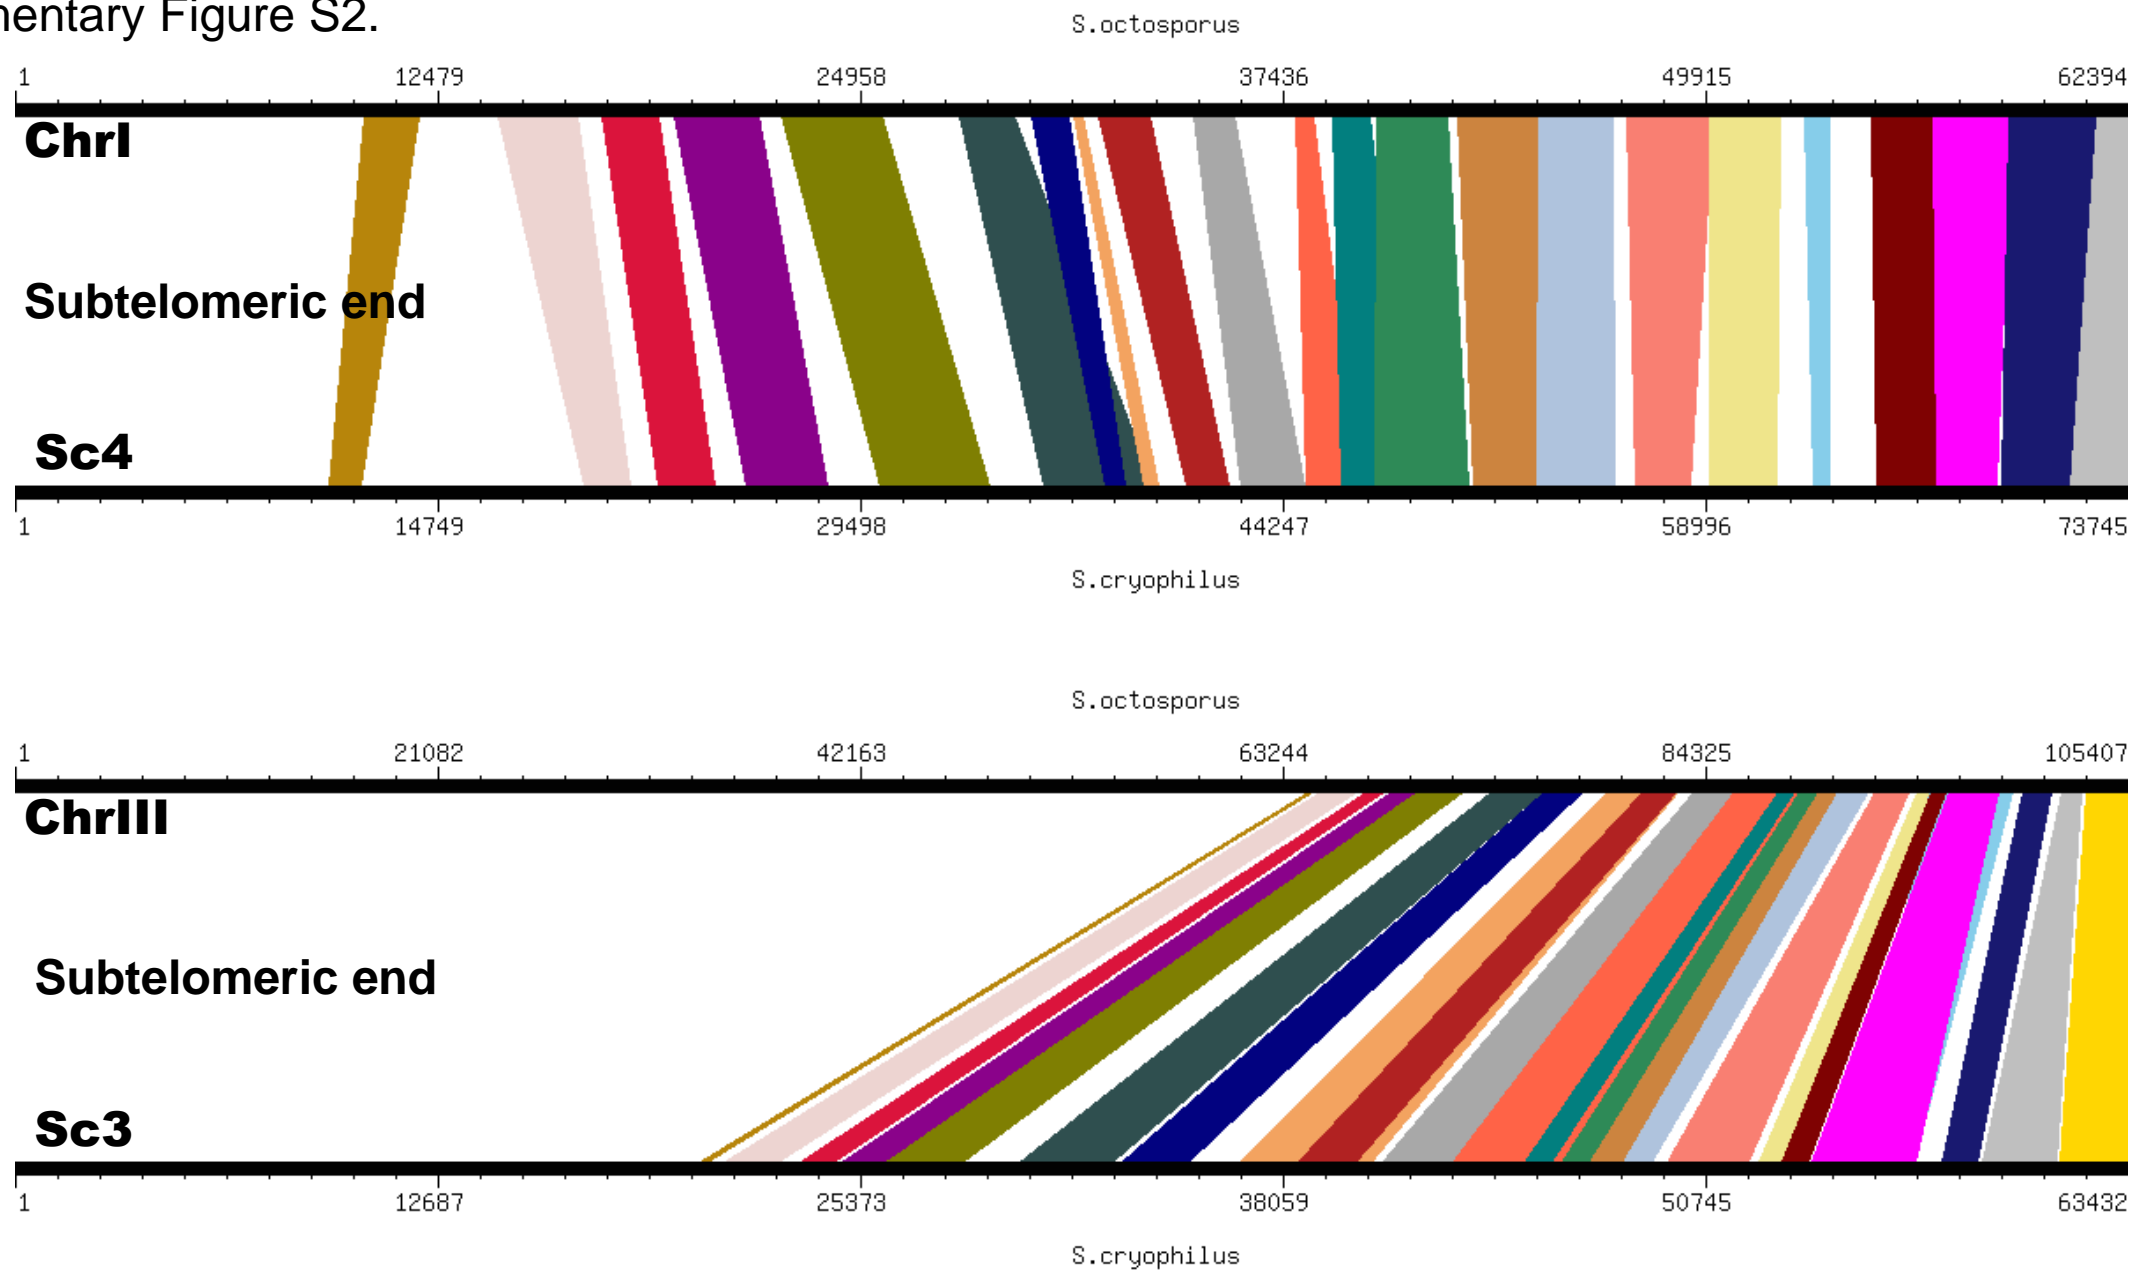

**Supplementary Figure S2.** Syntenic relationships of the subtelomeric regions of *S. octosporus* and *S. cryophilus* ChrI/Sc4 and ChrIII/Sc3.

Supplementary  
Figure S3.

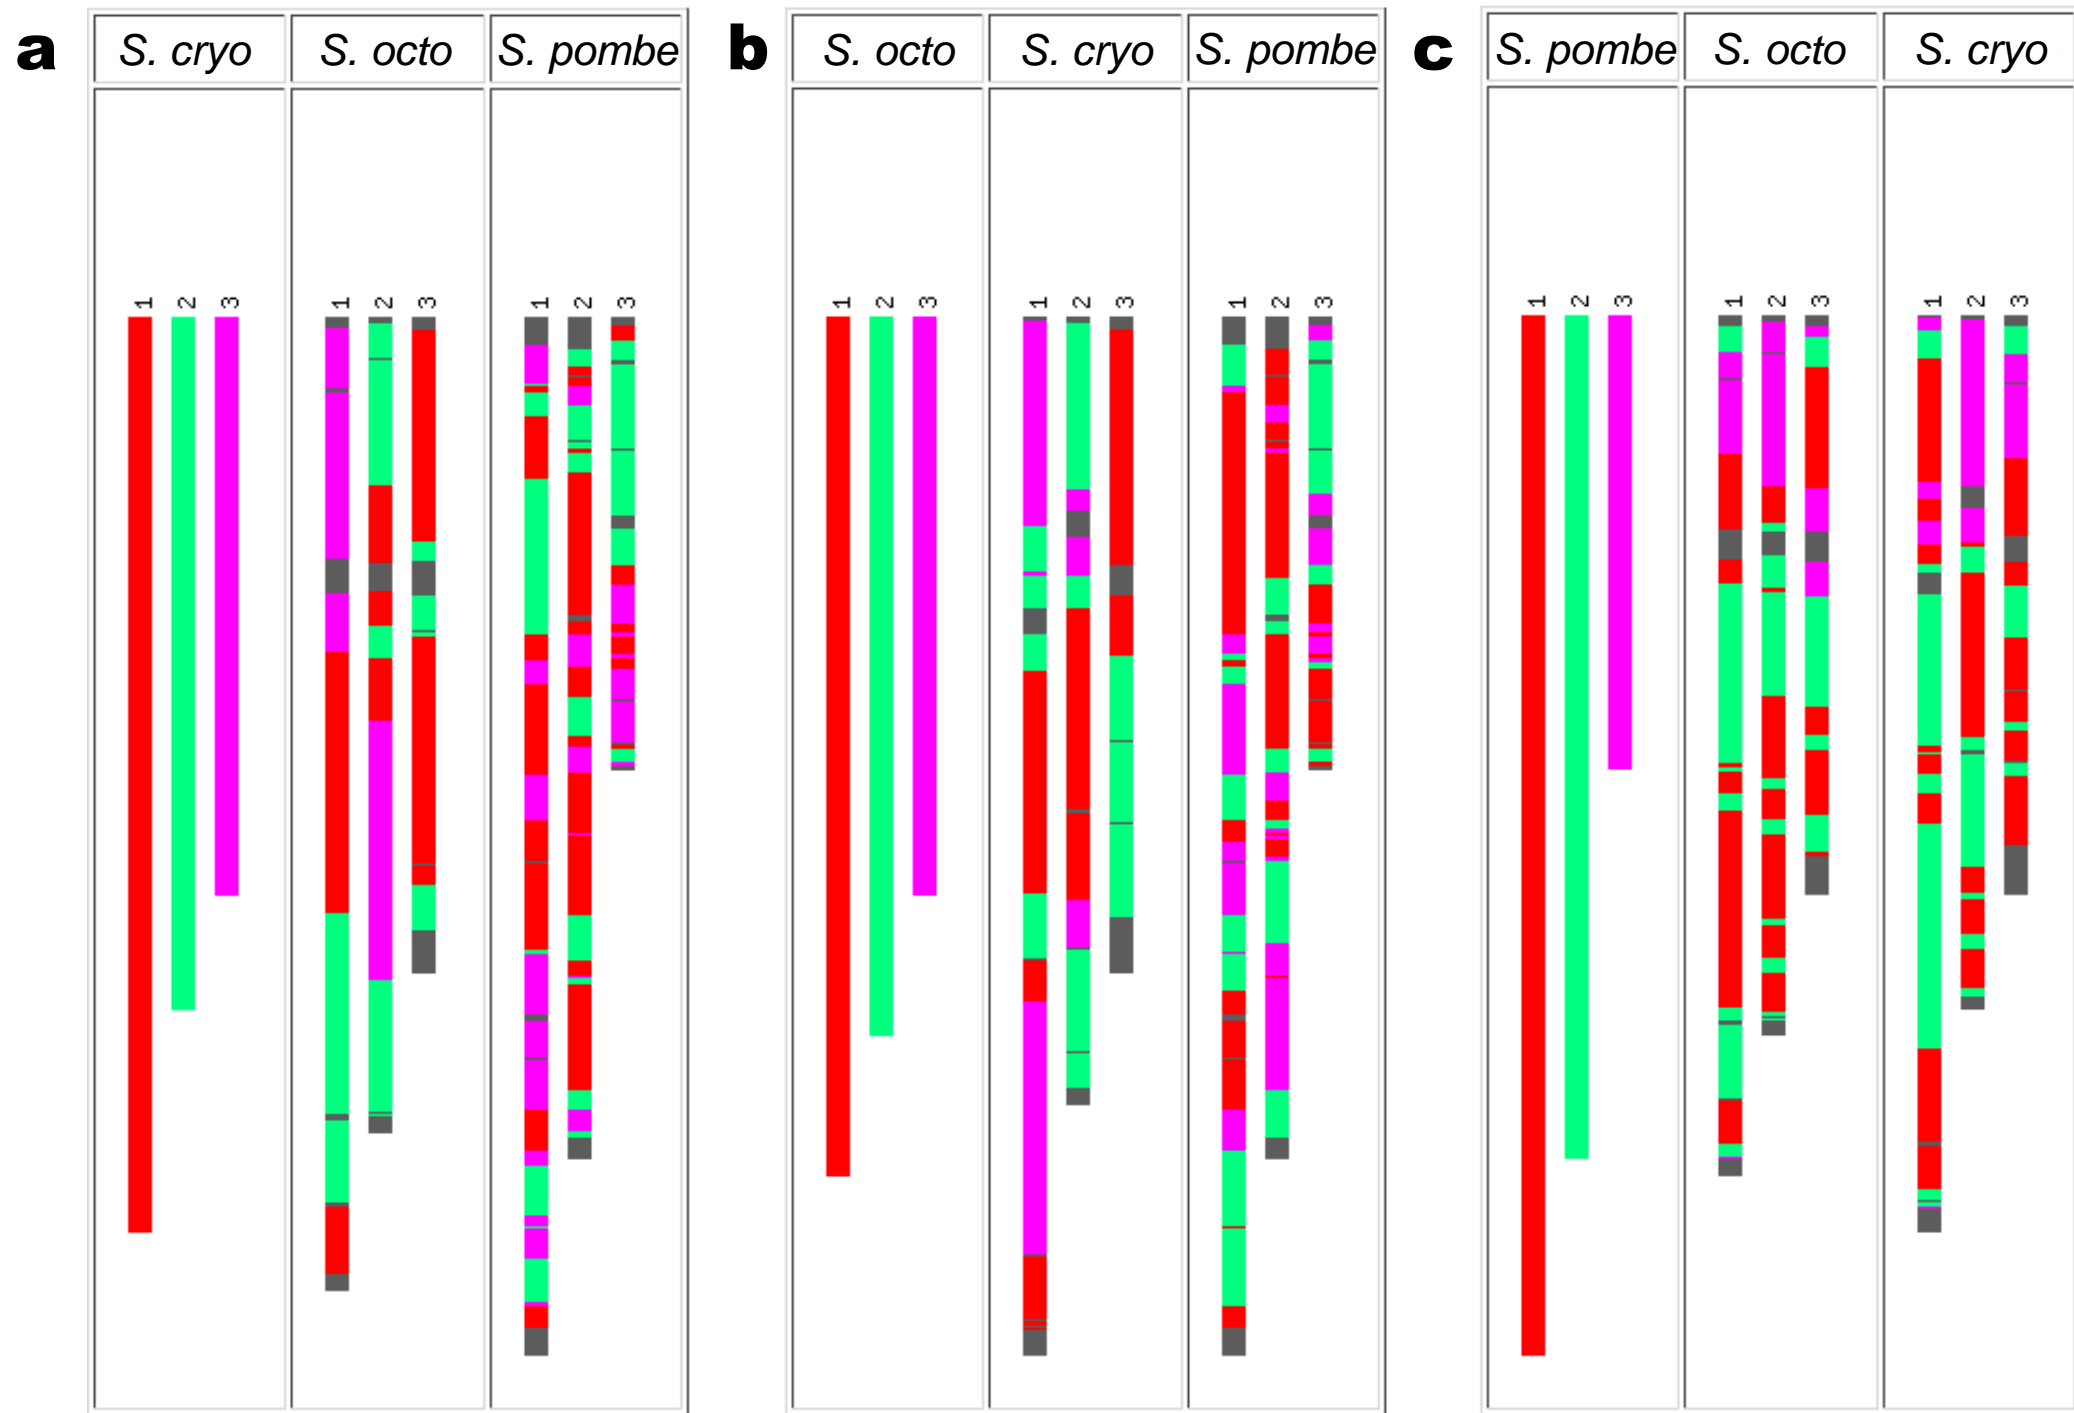



**Supplementary Figure S3.** Syntenic relationships of the fission yeast species depending 4580 1:1:1 orthologous proteins displayed by OrthoClusterDB. **(a)** Using *S. cryophilus* as reference. **(b)** Using *S. octosporus* as reference. **(c)** Using *S. pombe* as reference. The sizes of the individual chromosomes are not to scale except of image **c**. We observed that the chromosome lengths of the chosen reference genome can influence the representation of the lengths of other chromosomes during the image creation of OrthoClusterDB online platform.

**a**

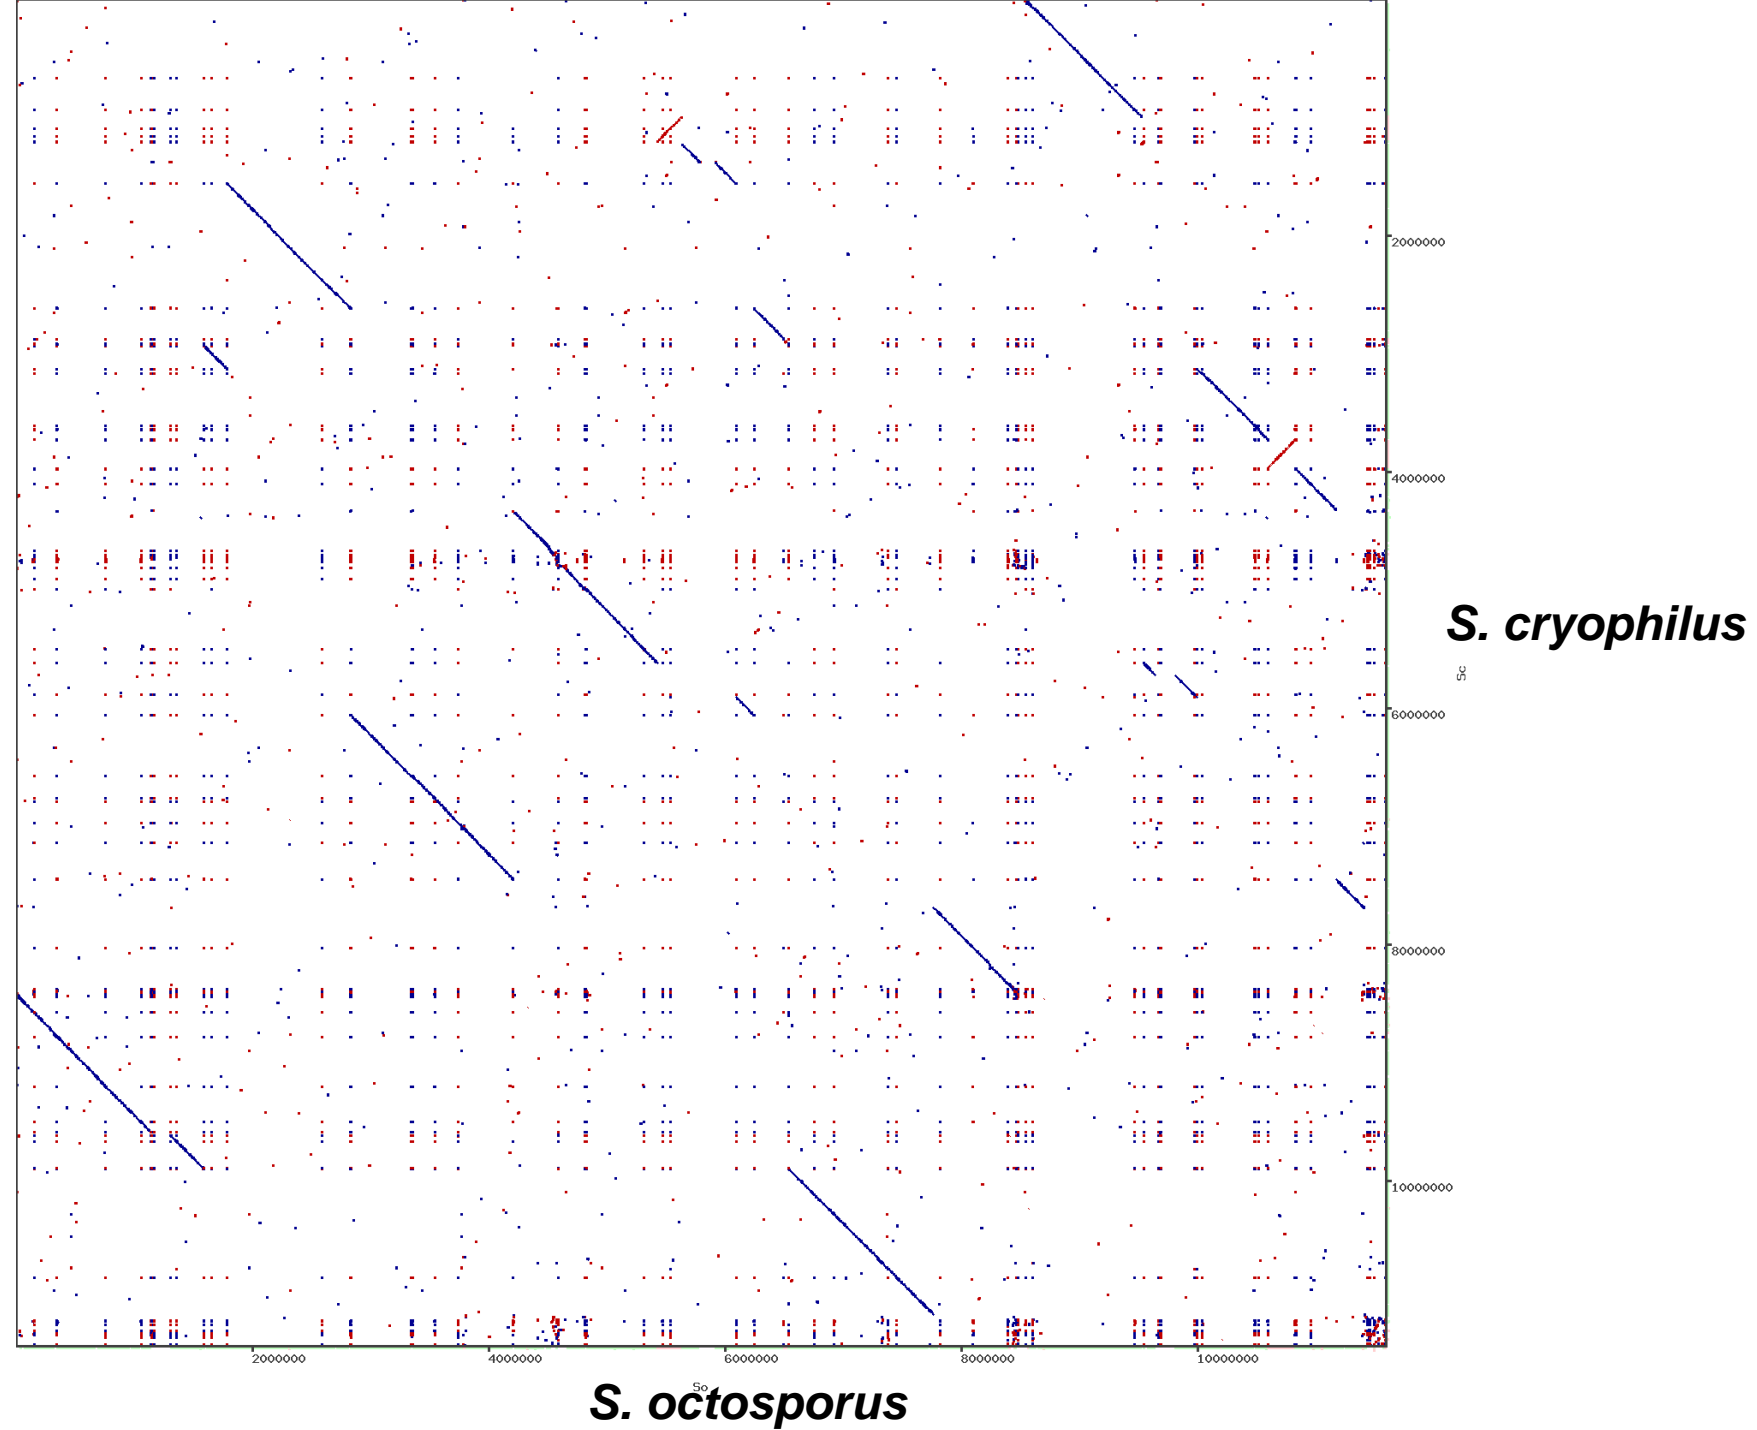

Supplementary Figure S4.

**b**

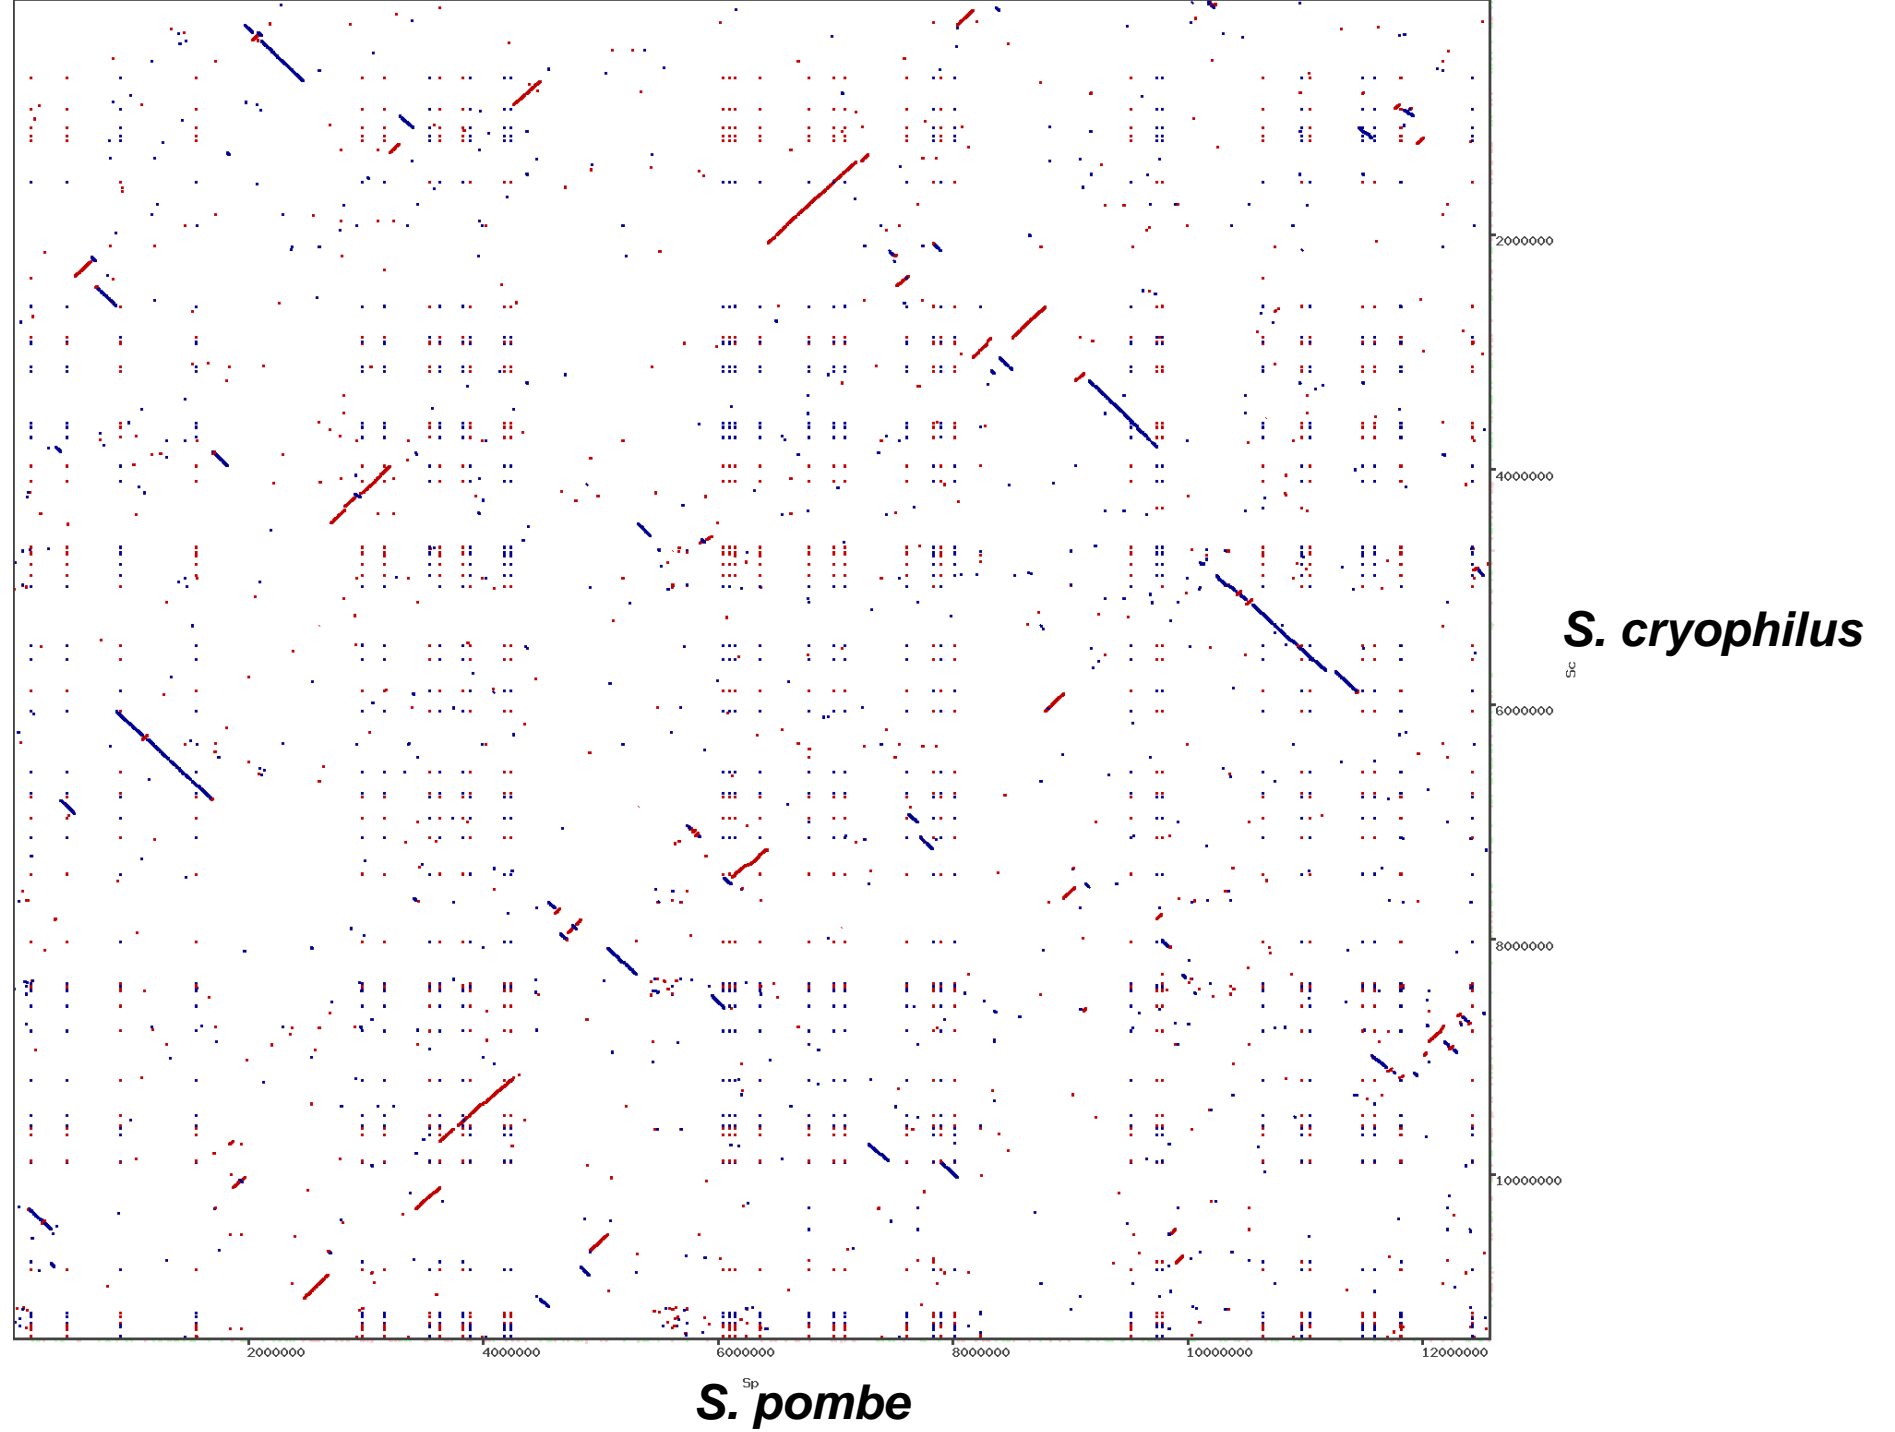

**C**

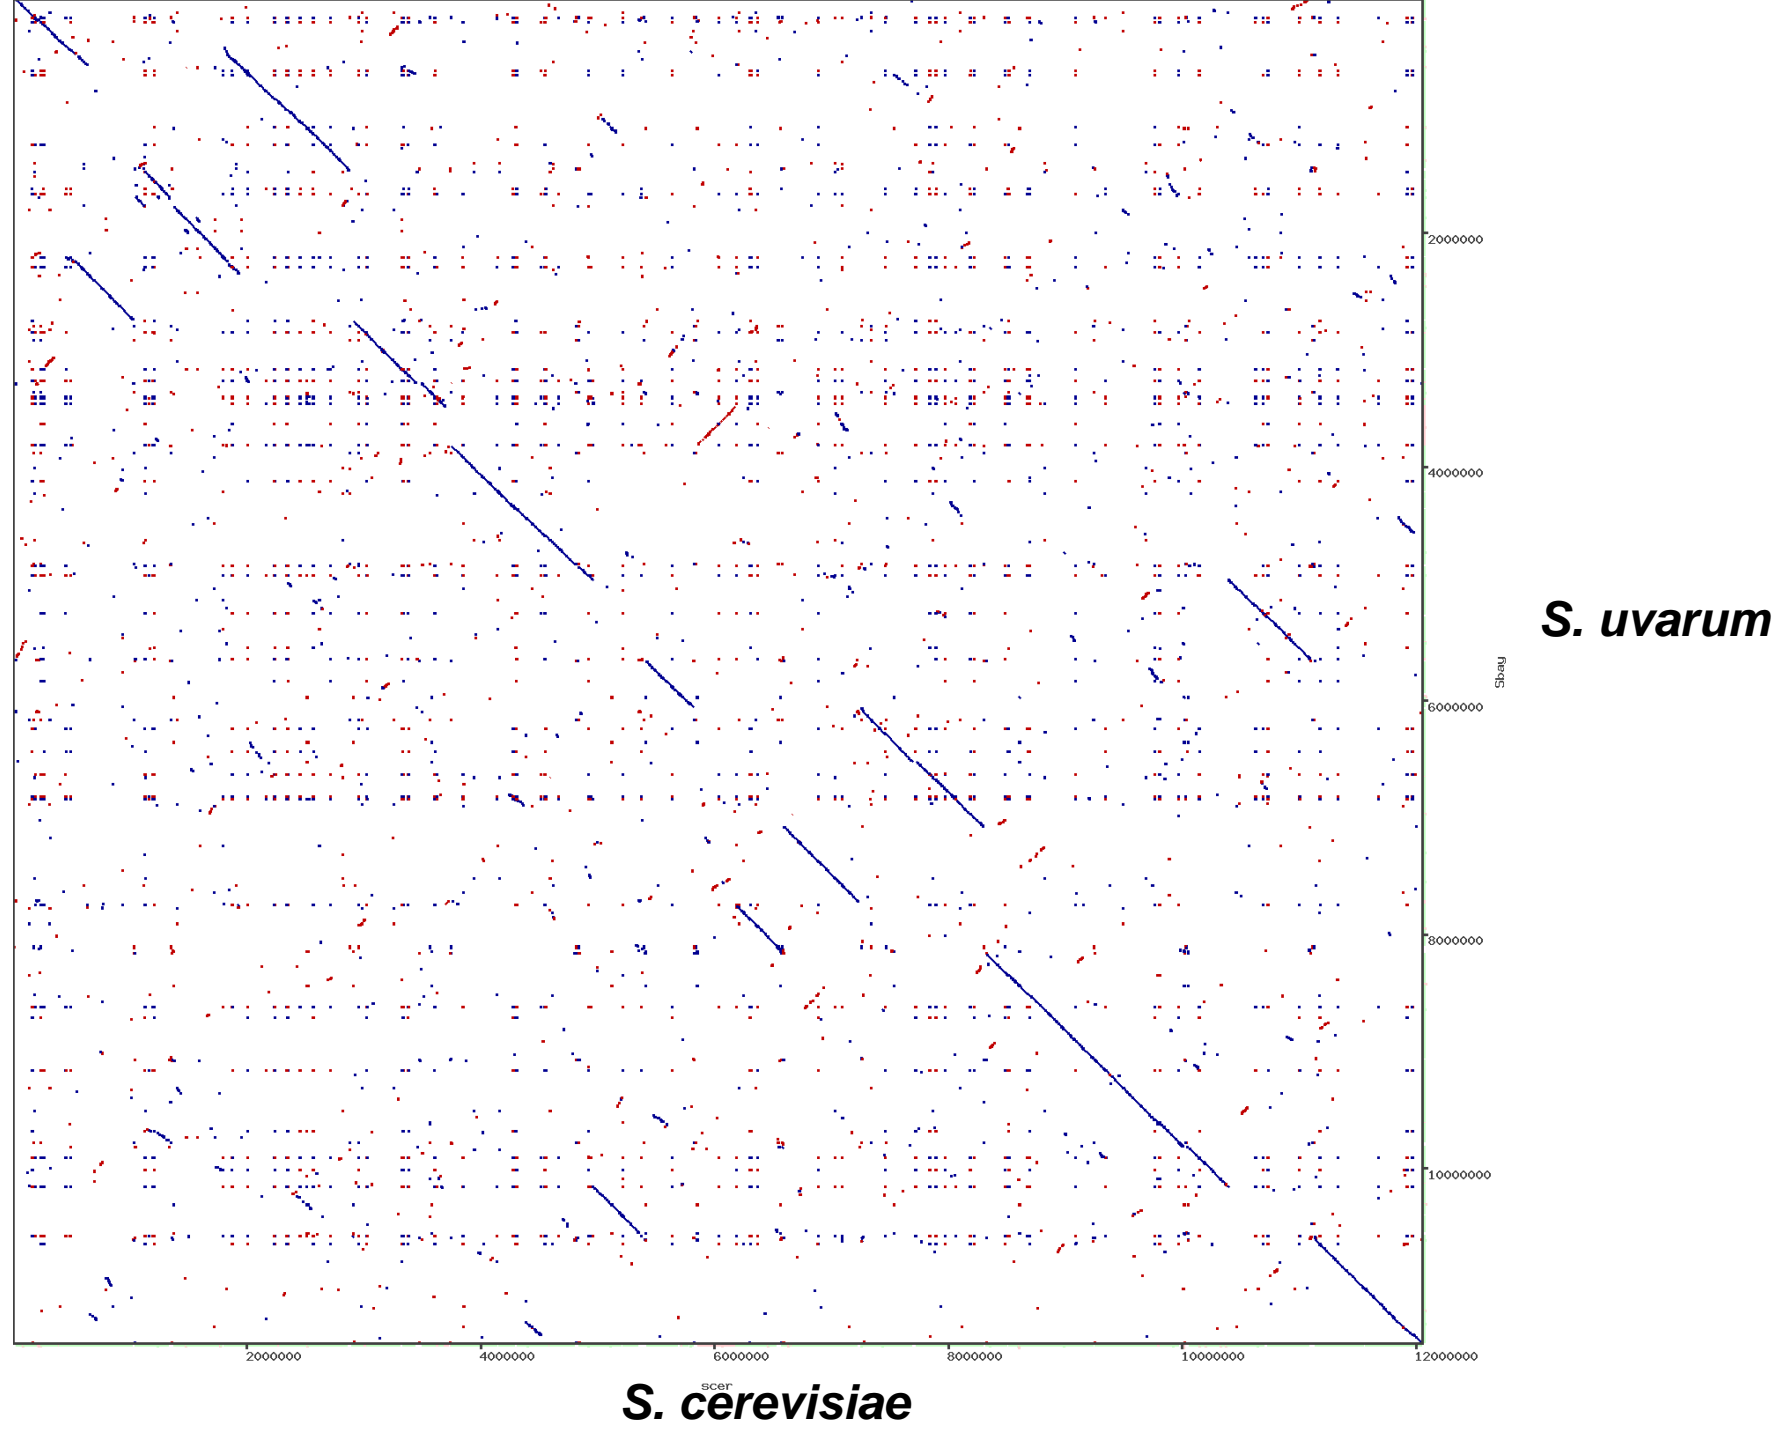

**d**

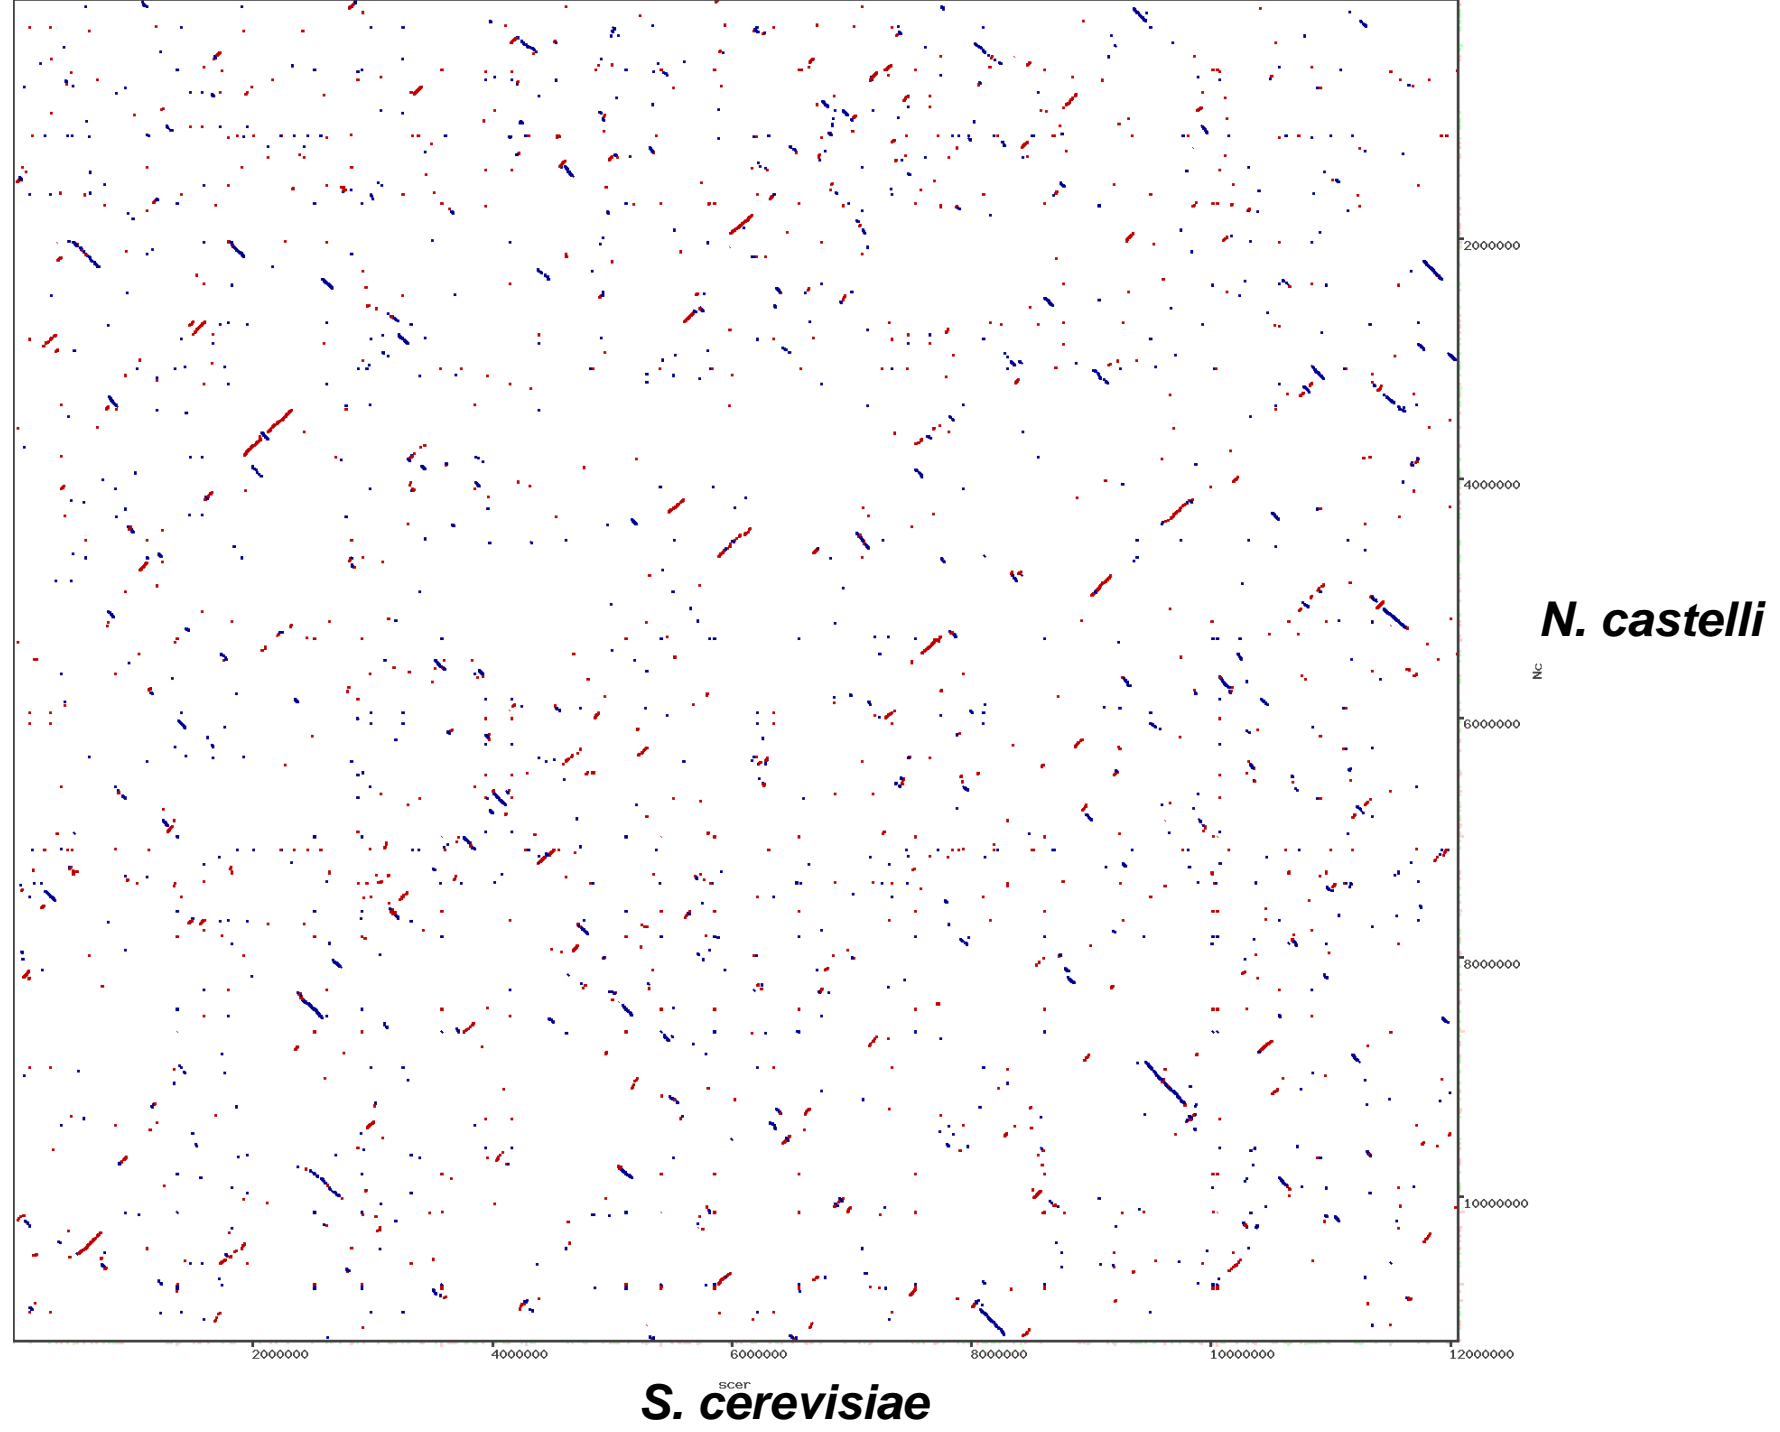

**e**

***S. cerevisiae***

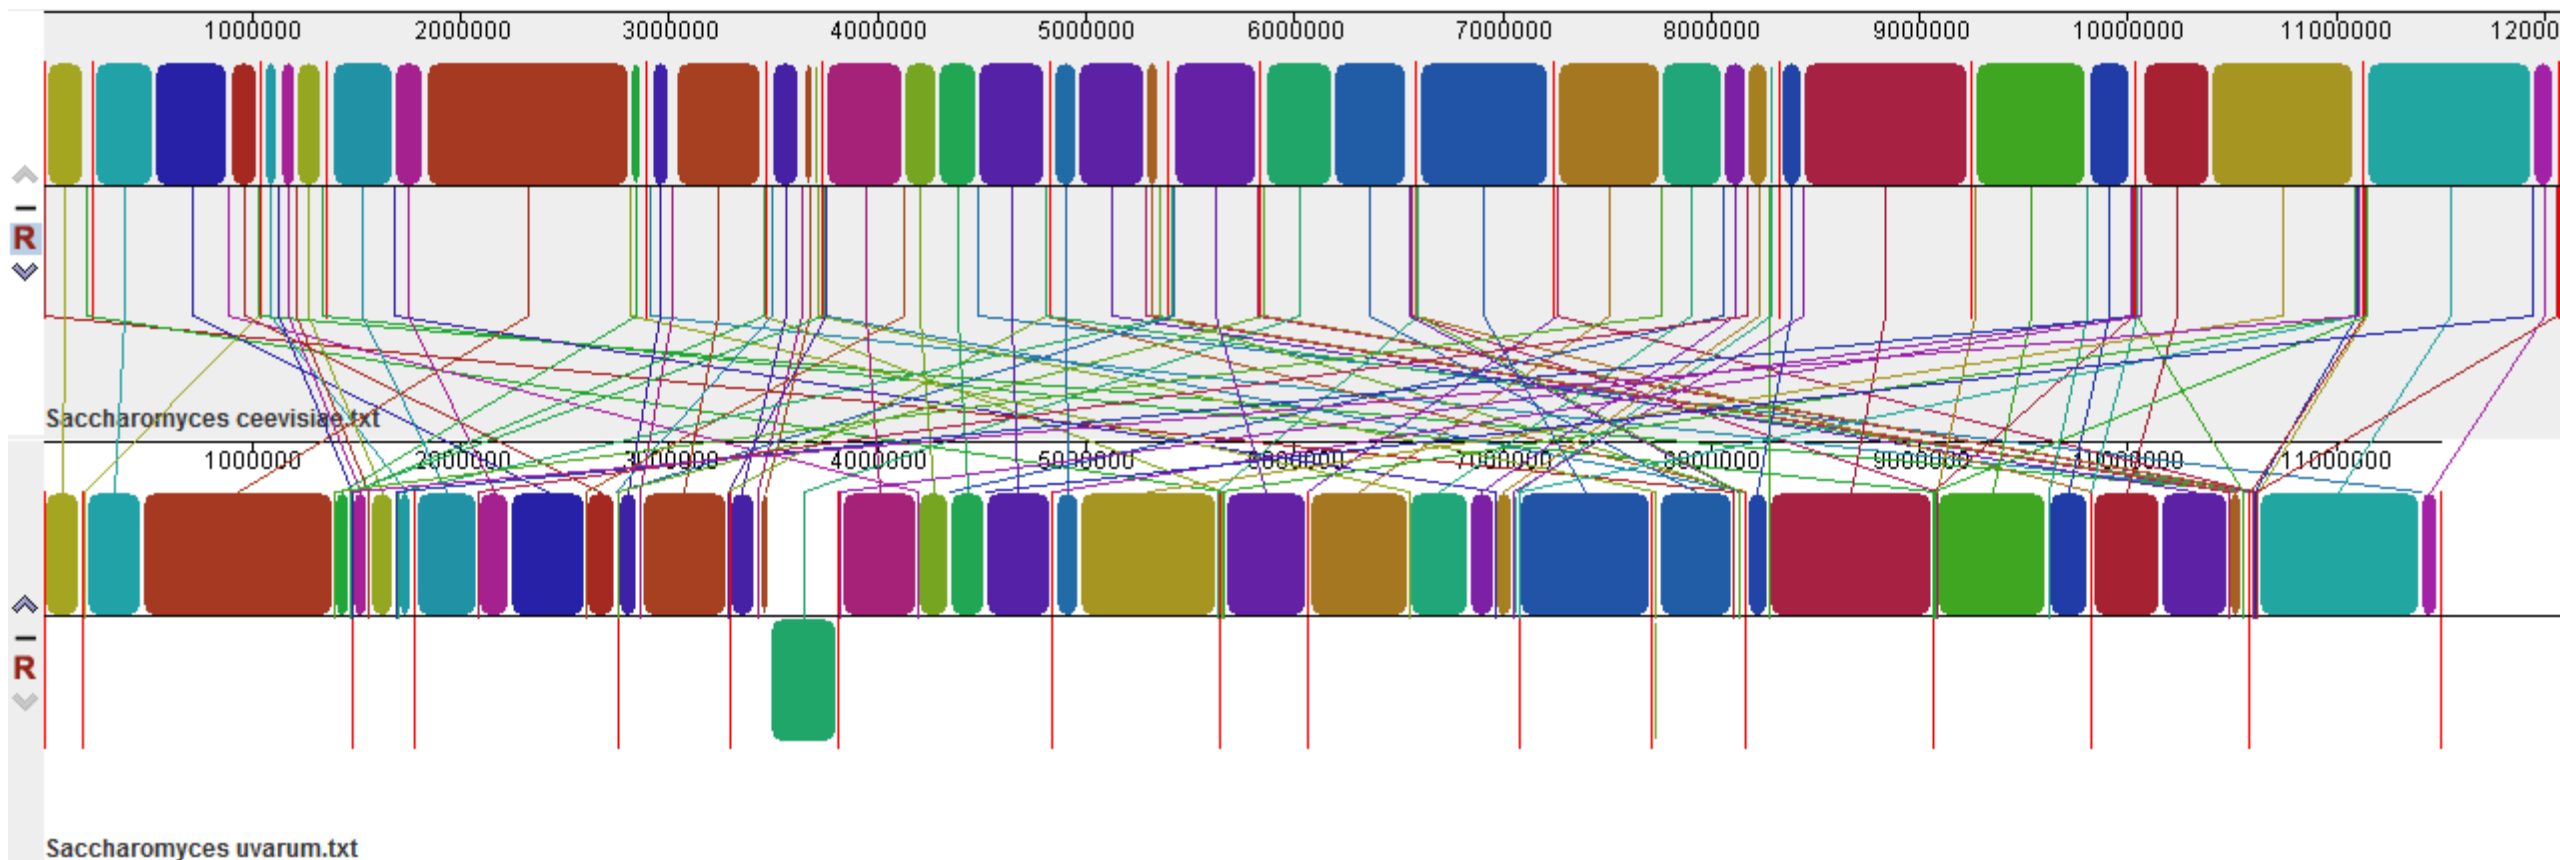

***S. uvarum***

**f**

***S. cerevisiae***

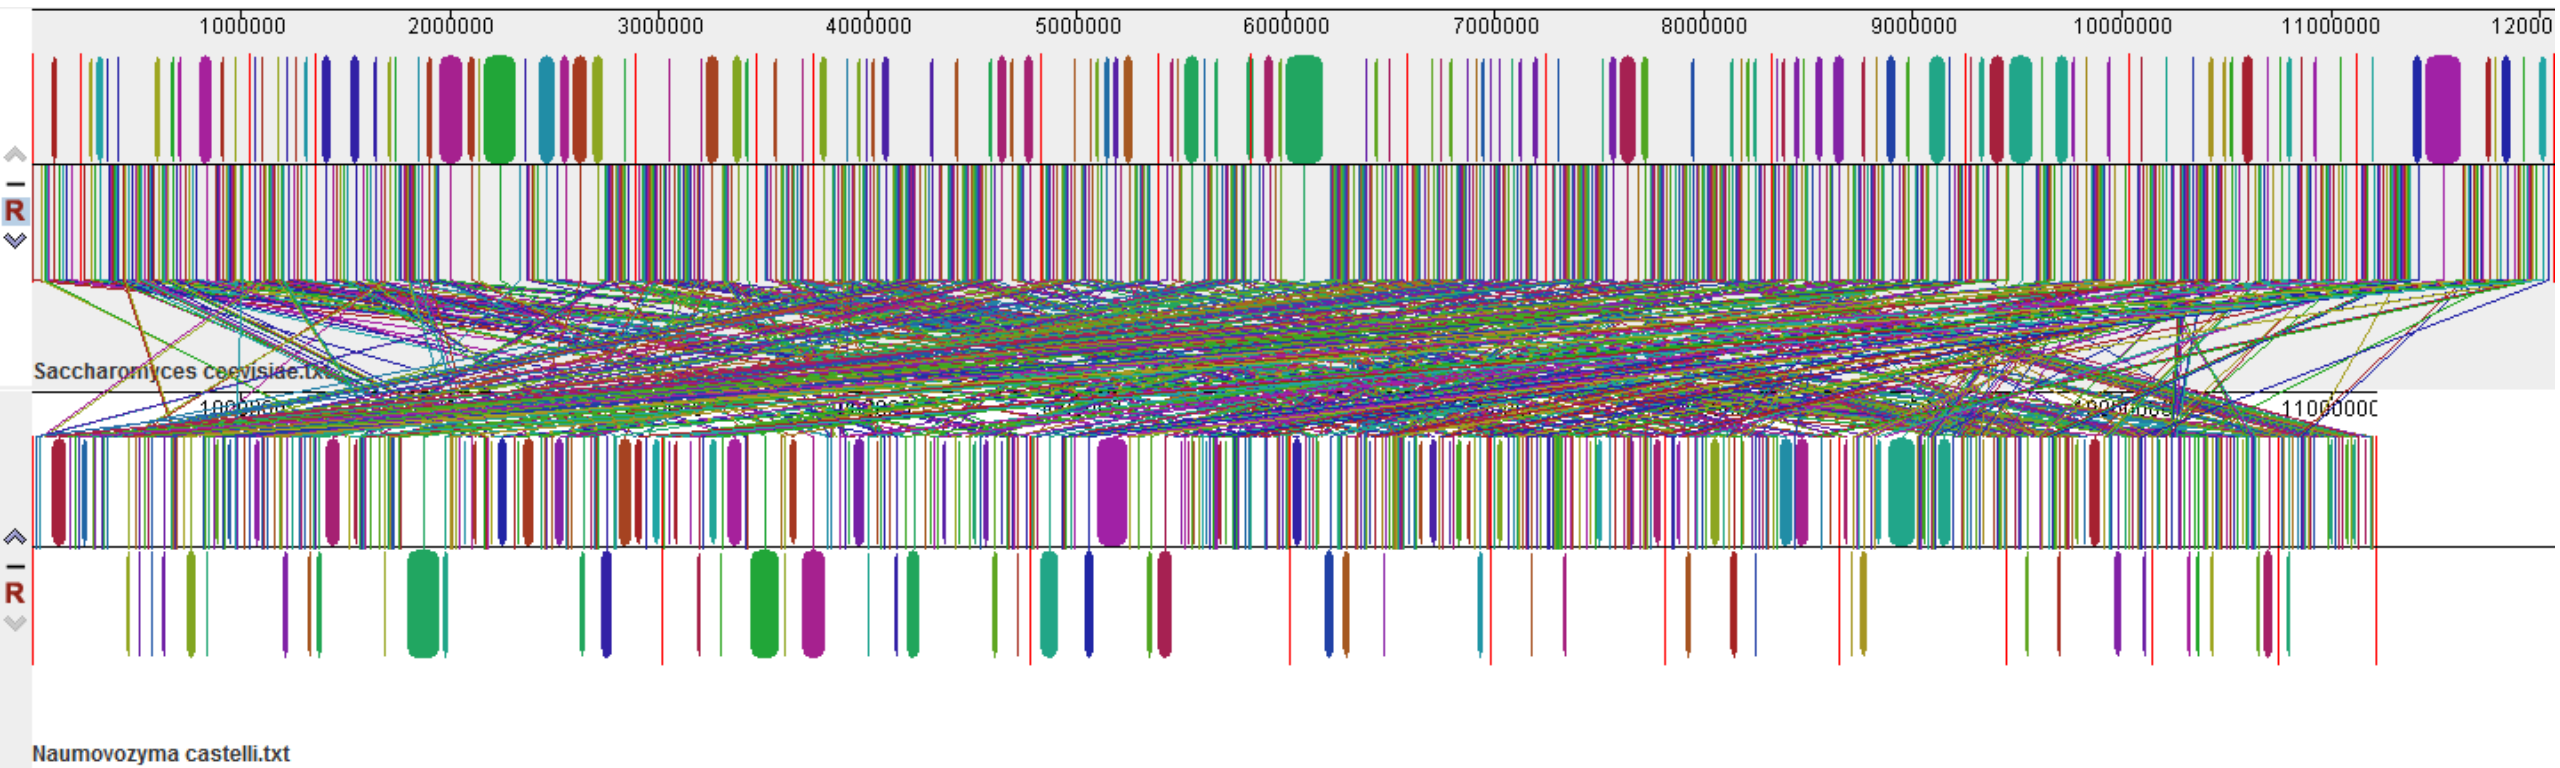

***N. castelli***

**Supplementary Figure S4.** Pairwise whole genome alignments with YASS and Mauve between *S. octosporus* – *S. cryophilus* (**a**); *S. pombe* – *S. cryophilus* (**b**); *S. cerevisiae* - *S. uvarum* (**c, e**) and *S. cerevisiae* - *N. castellii* (**d, f**).



Supplementary Figure S5.

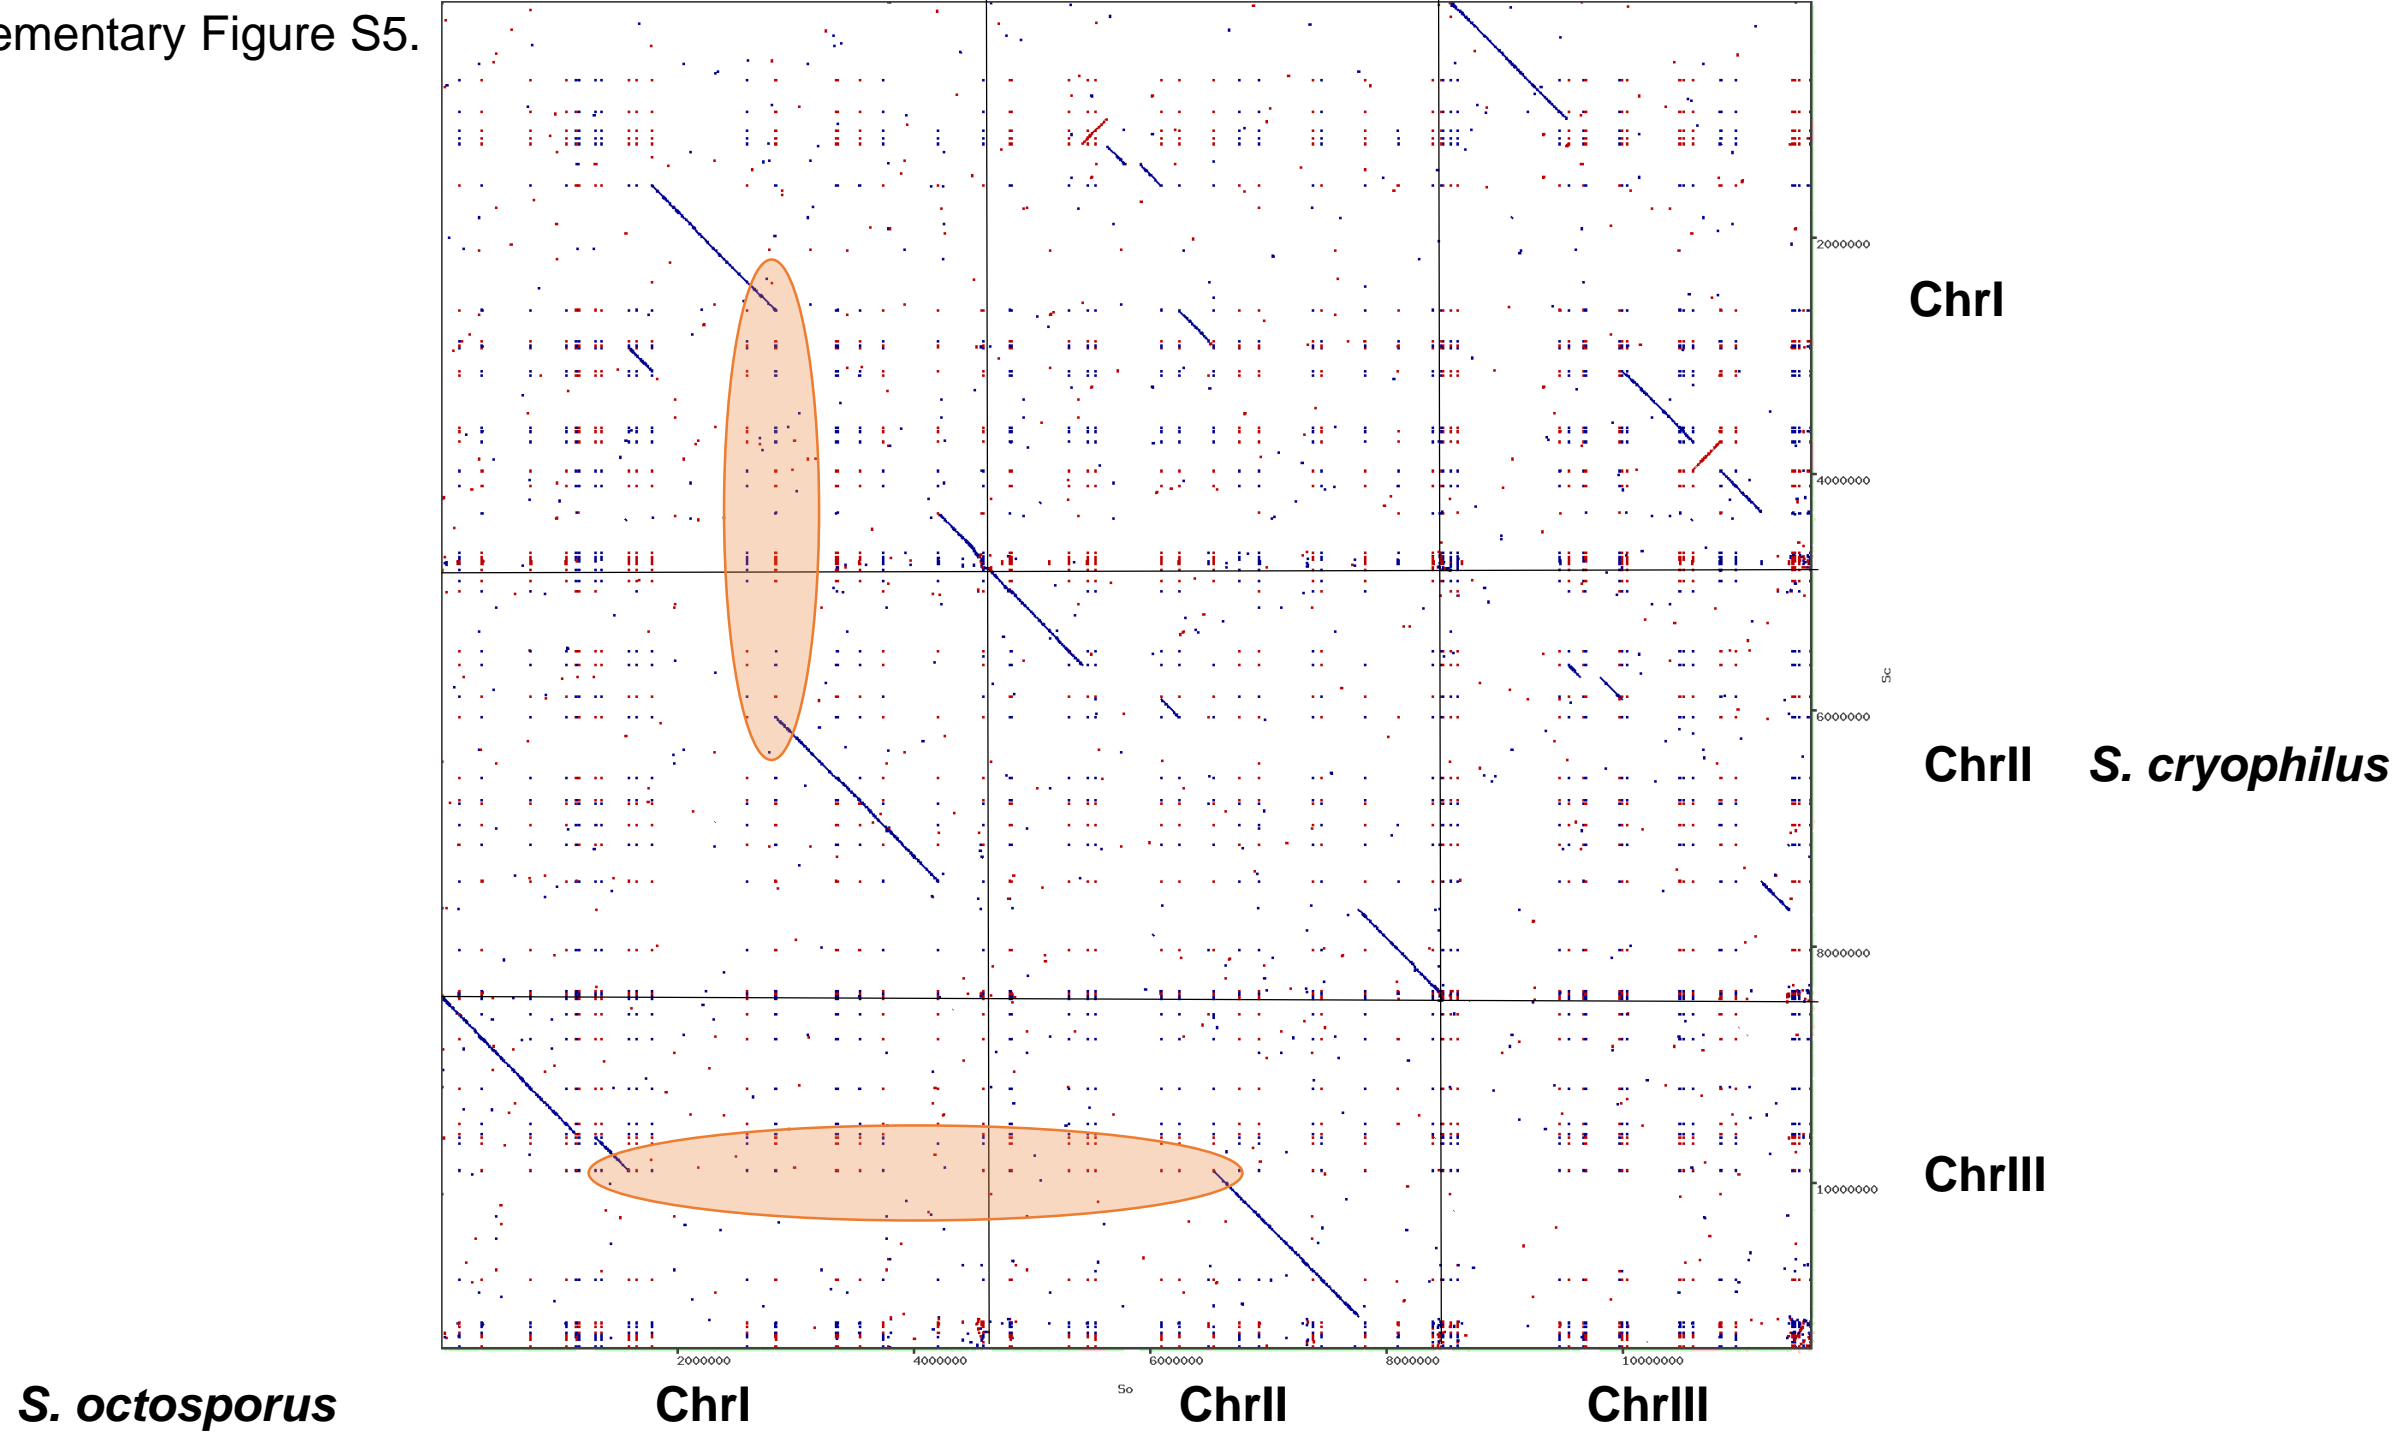

**Supplementary Figure S5.** Pairwise whole genome alignment of *S. cryophilus* and *S. octosporus* with YASS. Highlighted regions are examples of the disperse localisations of 5S rDNAs across the genomes.

**a**

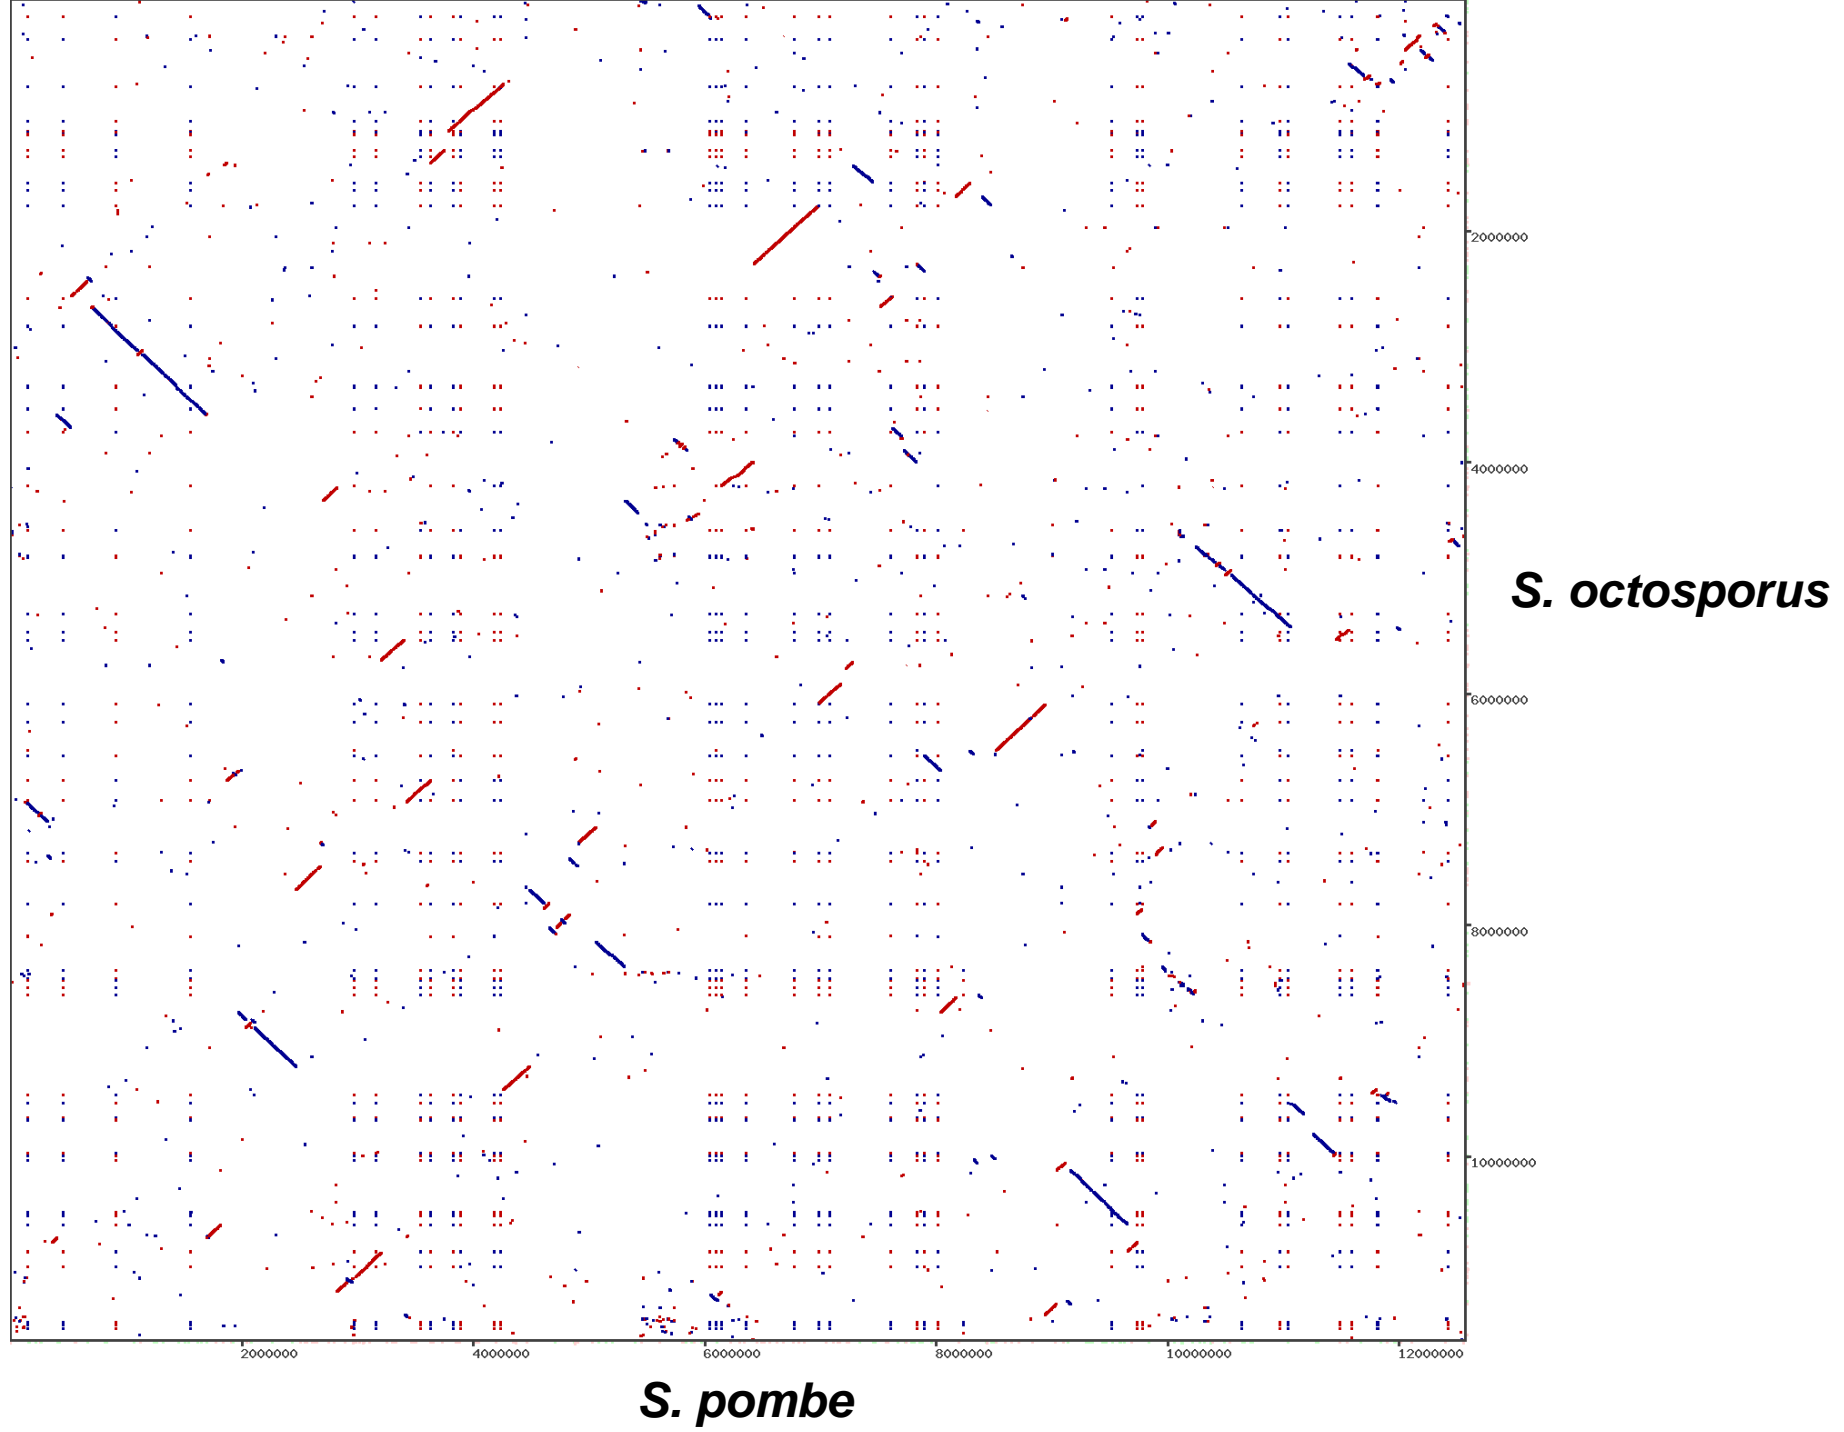

**b**

*S. pombe*

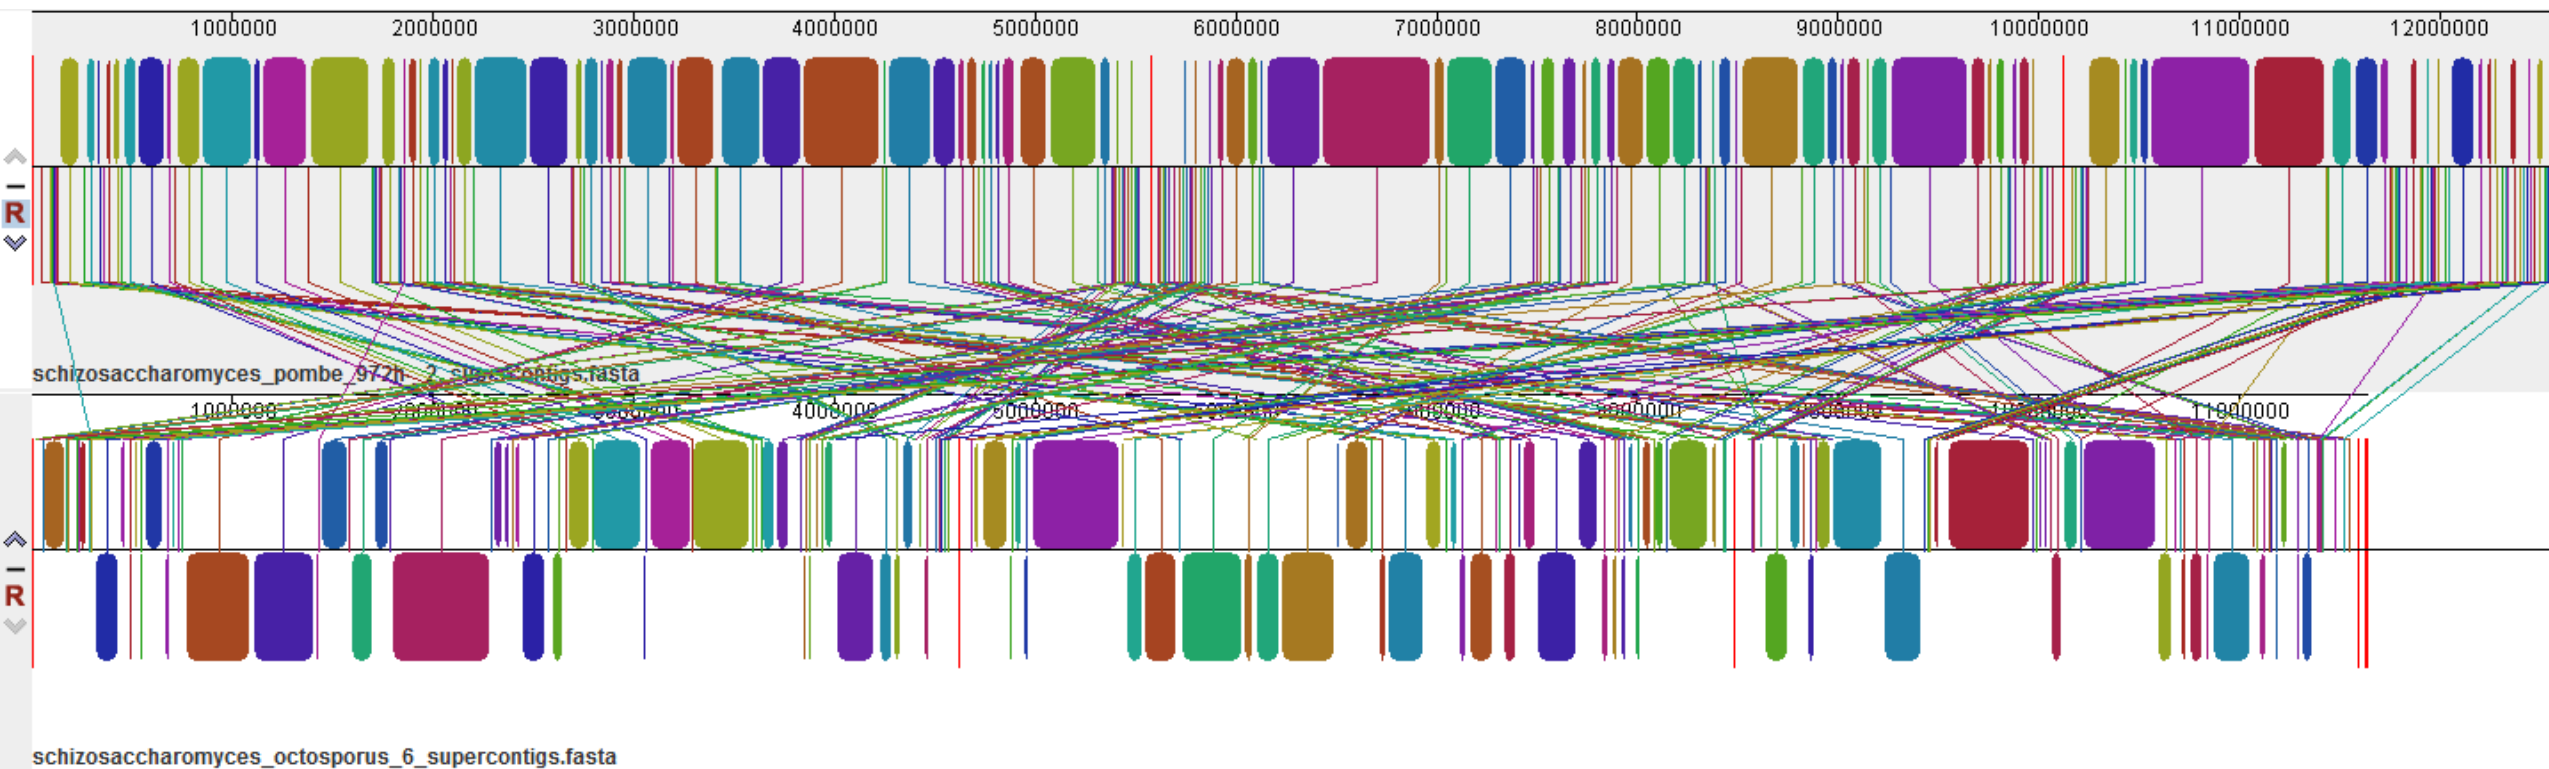

*S. octosporus*

**Supplementary Figure S6.** Pairwise whole genome alignment of *S. pombe* and *S. octosporus* with YASS (a) and with Mauve (b).

# Supplementary Figure S7.

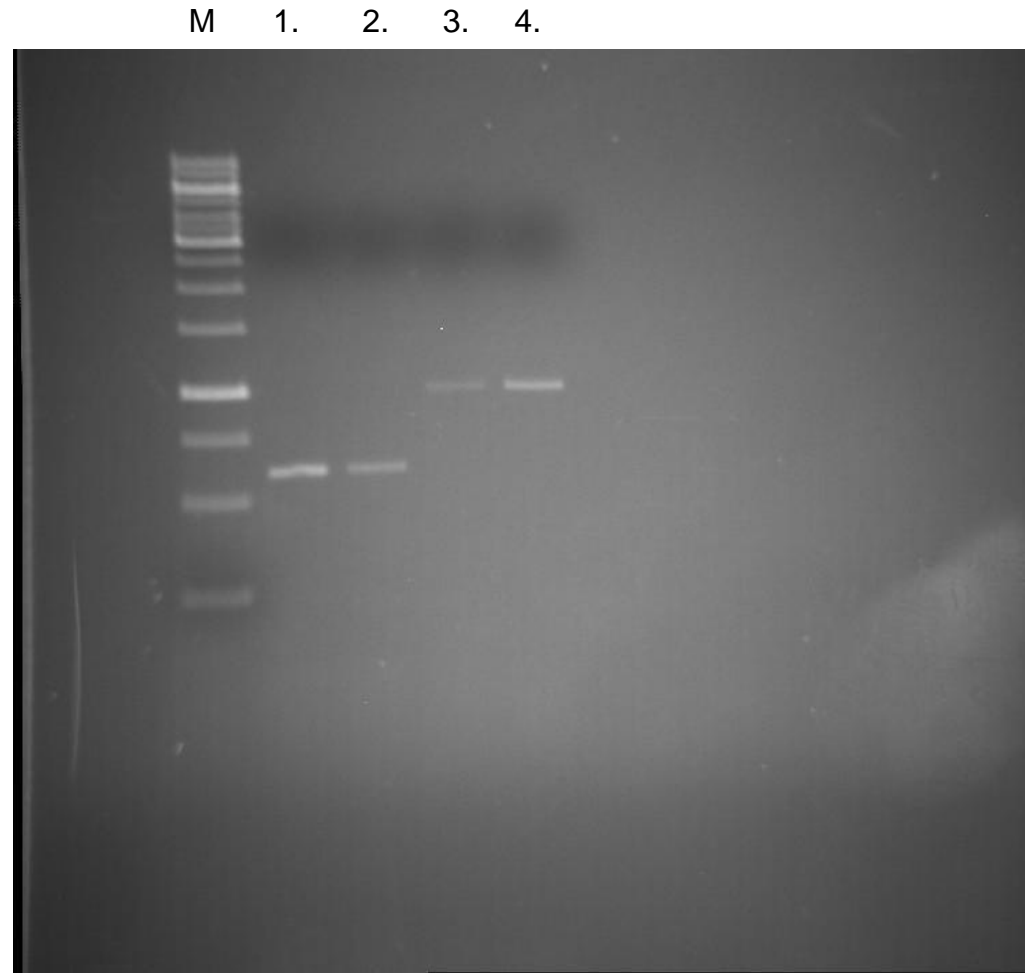

**Supplementary Figure S7.** PCR validation of togetherness of Sc9-Sc1 (lane: 1., 2.) and Sc5-Sc8 (lane: 3., 4.) supercontig pairs. M: 1kb DNA ladder. Gel electrophoresis was carried out in 1% agarose gel.

# Supplementary Figure S8.

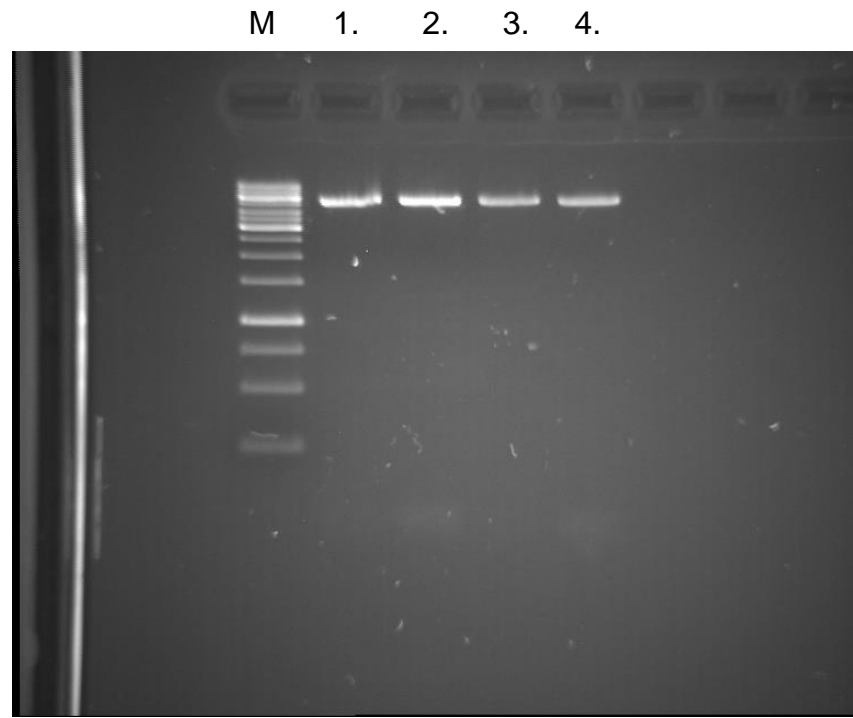

**Supplementary Figure S8.** PCR validation of togetherness of Sc8-Sc6 (lane: 1., 2., 3., 4.) supercontig pairs. M: 1kb DNA ladder. Gel electrophoresis was carried out in 1% agarose gel.

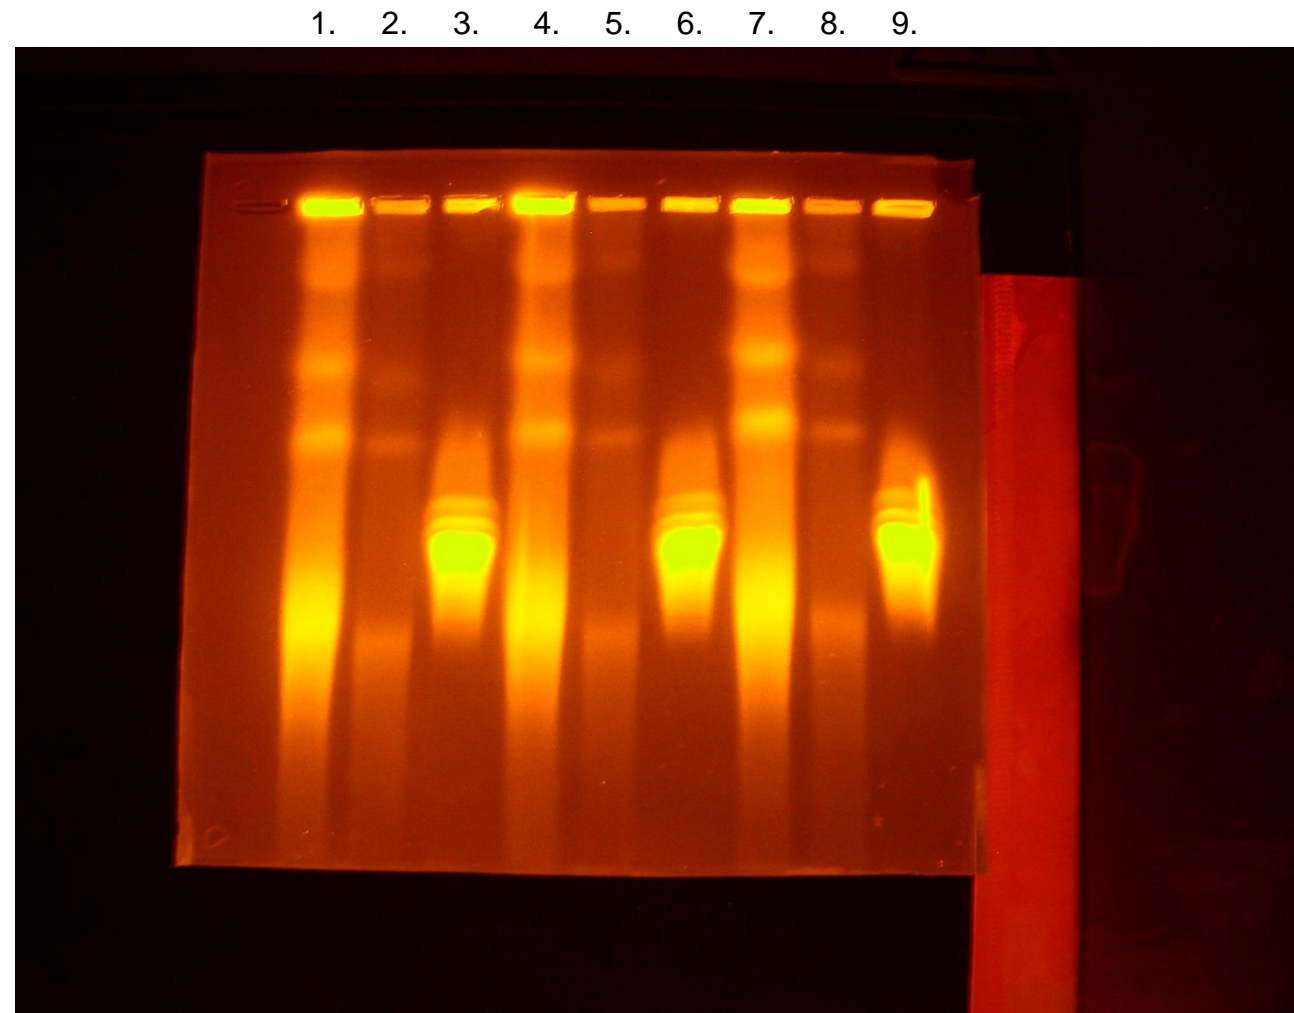

**Supplementary Figure S9.** Pulsed-field gel electrophoresis of the chromosomal DNA of *S. pombe* (L972) (lane: 1., 4., 7.) *S. cryophilus* (OY26) (lane: 2., 5., 8.) and *S. cerevisiae* (S288C) (lane: 3., 6., 9.).



# Supplementary Figure S10.

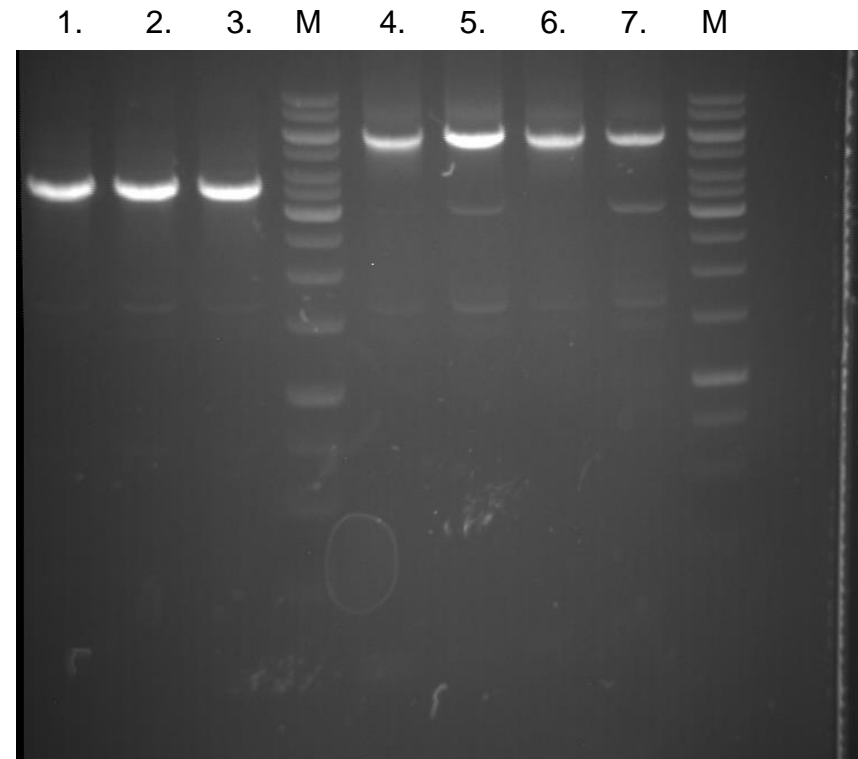

**Supplementary Figure S10.** PCR validation of the localization of rDNAs on *S. cryophilus* Sc7 (ChrII). M: 1kb DNA ladder. Primers 926-928 (lane 1., 2., 3.) and primers 926-50 (lane: 4., 5., 6., 7.) Gel electrophoresis was carried out in 1% agarose gel.
