# Supplementary material for: Assembly of Schizosaccharomyces cryophilus chromosomes and their comparative genomic analyses revealed principles of genome evolution of the haploid fission yeasts
Source: PubMed Central journal article supplement (PMC6168568; doi:10.1038/s41598-018-32525-9), 2018-10-02
Supplement: 41598_2018_32525_MOESM6_ESM.pdf [file 41598_2018_32525_MOESM6_ESM.pdf]

## Supplementary information

### **Assembly of *Schizosaccharomyces cryophilus* chromosomes and their comparative genomic analyses revealed principles of genome evolution of the haploid fission yeasts**

Lajos Ács-Szabó, László Attila Papp, Zsuzsa Antunovics, Matthias Sipiczki and Ida Miklós  
Department of Genetics and Applied Microbiology, Faculty of Science and Technology,  
University of Debrecen, Hungary

**Correspondence:** Ida Miklós, Department of Genetics and Applied Microbiology, Faculty of Science and Technology, University of Debrecen, 4032 Debrecen, Egyetem tér 1., Hungary

E-mail: [miklos.ida@science.unideb.hu](mailto:miklos.ida@science.unideb.hu)

Tel: +36-52-518-600/62056

**General description:** Here we provided the sequences of the concerning supercontig (Sc) ends and the confirmation of their overlaps and adjacency by Sanger sequencing. We highlighted the sequences as follows: light blue and grey represent sequences of the Scs. Green highlight show the positions of the primers used for the PCR and for the sequencing. Primers were designed to hybridize to the corresponding contig ends of the concerning Scs (see methods in the main text). Yellow highlight indicate results of the sequencing, which were in good agreement with the lengths of the PCR products in the case of Sc9-Sc1 and Sc5-Sc8. In the case of Sc8-Sc6 we did not sequence the entirety of the amplified product, we just validated the togetherness of these Scs. “+” and “-“ symbols in the brackets correspond to the original orientation of the Scs available in the corresponding databases. Results of the sequencing are available in Genbank under the accession numbers: MH605091- MH605096.

## Sc9 and Sc1 overlapping contig ends and sequencing

>Sc9\_end (-) & Sc1\_end (-)

```
atatgtgaattaagaagaagttatgggaagatgataagttgctgcataactggcaacctagtcattctcattgatagaagtaaaagacgtaac
atattgtaccaaaaaaatgaatcgaattatccggacctgtctggcttctgttcctgtatgctatacgctattgatcgttcatcatcgttctgatttc
ggcttgctgatttcctgggatcctacgacgtatgtagttgcaatatcatcacaagttggcaccgtcaggtaaaactctcgttgaatttctataaaa
caatcagtaacgtgtccaaaagtaattgcaataggggaatgcatacccgtagttacatcccaagctgttctgctttagaagaaccagttt
gaggagggtacttccgattaattttcgagacaactgagcattcaccgcaagggacaaggaagcagatgaaacaatataatgaaacaatat
atcttcatatagtgtaggcaagcttgataatggctaaagtagtatggaagactaaacaataattagcatgagacatcaagactcatt
tgggttacagccaataattttcatcatttcgttctatttagattttataattagtaaagtaagacagcaagaattgctgtaagaaaccattgg
gtatcacgacatagttttgatcatttcattccttacctgtctctcctgtggtttaaaggagtgataacaacaacctctcactttcttttatttc
gccaagttgctgagttcaggcatgtataggccattcttgtcaatcattacgcttgaataaccaatattacaaaaccacaattagaactgtt
gataaaagtatctgtatcctctgttaaaacacatcttataaaaattgatacatctcagcgttataaaatggaagttgcggttgaagtttaagt
agagggtactgatatttagttgtttacttaccatcaatactgaagttgacctacagttcattatagtggcttcgtaggcctctcattccaaaa
ggcaattagatgtggatttatgtgaagtcacaatattaccaagtgattccaaggtatattactataaagcgtagatagtttatggccgccaagtt
gtgatgcataaattgggtccctcgtagcattcataatataacaattcgttataagaatggaatattagctaataatcagttaaattcataagcttaa
agaattgtgctgataataagtaaacaaaaattgaaaatgcaaattctcttgattgcagaaactccgattaaaaattacaattcgtgattattg
ctattaaatagagaagccagtcacgatggcaaatatacagaataatataatataatgtgtgctgacagtcgaaatcttagatcgggaagatttgactg
atcaggctaaataagattgacacttagtctgtttcatttagttaatcagatccctggacatattactattactctacgtagtaaacagtcgaatt
ccaatagacaattttgtaattgtacttattacttccactcgatttacattctcataacgtgtgagatttctccgtgacatgtgaattgcagagcaac
cactaatattatacaaaattttgtaataattatcctatggagtatattactgtataccaatgtttataaacaacaaacaaactgagaaagcagacgg
aaagtttaaccaatcatcaagaattagctcaacctattgtttgcttacttagtttagattactatataaacgcggttctcctcagccaaaatct
tcagtttaggaagattttgctggcagagctaataaactgttcgataacatattcattagatcaccagagacgttactaaagatatatcactccaga
tatttagtaacttattttagagtatccagcttgacaattcaagcaattataactgtattcactcacacattattactatacggagattttcccggtg
acatgaatgtcgtaggactgtataatttttatccattttgtcacgggagaaatctcatagttatgagaatgtaaatcagtggaagtaataagt
acaattacaaagttgtctattggaattggacgtgttagtactacgtagaagaatagtaatatgtccagggatctggataactaaatgaaacgact
aagagtcaatcttatttctcctggtcagtcagtcctctgatcgaagatttcgactgtcaacacacatatataattgttctgtaattgccaatcgtg
actggcttcttaattaatagcaatgatcacgaattgaaatttaacgagatttctgattcaaaagagaaattgcatttcaatttttgttactt
attatcaagcacaattcttaagcttatgaatataacttatattagctaataatccattcttataacggattgtaattatgaatgtaacagagga
tccaattatgacacctccctgcctaagagctttcactcttgaattggaagactcttattttcatgcggttctctgttgagaaagcgacgatt
aaattcaatgagcttgagtagcctttttcgaacgatgtcttaggaacctatgtgactgagcagatagtcataatctgagagttgcatctatata
acaattgtagtgagaaggcttttaggttatcagcttctaaaattcgtcaataacgatgtttgcataaaattggttgagcttaagtccgctgtg
aaggttcgagttcggatacatgaaaactagcaggatagcgtctctgtagctttcaggaaaatttaactcgtagttatgttctcctattttctttta
ctgaaaatggaccaacaatgttgggtcaagttatttgattgatggaataatccactttgcattttgactaatacctgatcgttaggttgga
atcgggtgggaattgtttttggtgtaatactttcgatattatcattgttctgatacgttcacgtatttcatcgatggattctgtctgtccggt
aaataaggaatatctagttcatcaggatttgcgtatccaagcggtactatagcttgaataccaaaagcagcattaattggagctattttgtag
cagaatgctgtgaagagttataacataattgagcttgagaagataattgaccaattgttaaattgttgggtcagtagcaacgaagatatgact
ccaagatttgattgacgcg
```

## Sc5 and Sc8 overlapping contig ends and sequencing

>Sc5\_end (-) & Sc8\_end (-)

```
gaaaatcctgtcctatgtctaaatgcatgaactcttggtcatgcaaaaacctgttttttcatgcaagaaaaccaagcaatagctacttccgatg
tgcattggaggagggaatagattaaaaggaacaaaactcgaagtaattgcagttgtaggtggaaatagaagaaataccaatgagctagagtcg
cttctcctagtaaagtgtactgaattggagcagcctgatcgagagttcattaaagtagcgattaagcaatacaataggcggacggttctcag
gatttgatttctggattgttcaaagttgcaacaacatgtatttgaagctttataccagaaatgattggatctgcgcaagcacgaagcaaaaa
gacaaatacctccaacaagaaaatagctcagcataatacgtctttggaattcctgaacaaggaatgcatcatcattgagatgaagagtattt
aagcataaattcatcgtttaggagagaatcacatacaggactcggcttcatcaaatcctgtaagtcgataacctccttgaattcctttgga
gacttttctactgggatgaatgtttatatacagacaaaacgcaatcttcttctttttagtagctttgaaagcttgcacgcttccccgcaaagga
tatcgaatgtttggaatgcagaaacctttagctacaaaactctcaaacgttctttgaaatgcttctttgagcttgaaaactgcttaagtc
caagcccaagagctacacatttagtcagtaaattgaacacaaaaacaaatcttgctaaattcaagacaaccacatacattagggagtcacccat
ggaaaaaagactgacgaaccgacaaactacaaatcaaaaaagaatgattcaggagcaaaagtgattccgttctaactctataacgttcttca
ttgttctttgtatgggtttgcaacgagtagtactactaagtccttaccataaccacggaatagtgcccacaatgtaagccaacgcccgttgtt
aagattcactaataaacaactatctctaaaattcgataattgaaaaaacgaattacttgcaaacatgggcttcaagctgccacatttlaag
gacttcttattgaaaatgagagattgcttctactaggttacttctgttcttttagttgtatattacaggtaaagctccaagttttacaaaacata
ttgaaagatgaaagacaagctttatagttctttaaactaaatattggtacaacaagtgaaatgacttgaatgaaaaaacgaaatcactc
gttttaatgaaggatcattgttttagtagcaagaaaaacgcttagtattatttaggaataacgaataatataattattatggcaataaaacta
tattaataaggtaataaacgtgtcagggagaaatctcacacgttatgagaatgtaaatcgagtggaaagtaataagtaacataaaaattgtct
attggaattggacgtttagtactacgtagagtaatagtaatatgtccaggatctgattaactaaatgaaaacgactaagtgcaatcttattag
cctgatcagtaaatctcagatctaaagattcagctgtcgacacacataatataattctgtatattgcatcgtgactggcttcttaattaat
agcaataatcacgaattgaaatttaacgagattctgcaatcaaagagaaattgcatttcaattttgttacttattatcaagcacaattct
ttaagcttaagaatataactgatattagctaatattccattctataacgaattgtatattatgaatgtaacgagggaccaatattgacaaaa
gttcgtttgtattagaattgtattagaattgaatgaatacgttcatcttattacaacaatagccccagatactaaaaaaatcttaaccacaa
ccgttaactgaattgacgactcgtttagatattcgcaaagtaattttaaagggtatattgtttatagaataaaaggaaatgctaaagagatc
gcttcaaccaatatacttagagcttaaggttggcaaacagaaaaggctctaaacaaacgagccttctcgtcagctattcattctgactataaa
aatcatccattagagatttcttactgctcaagaataggagctcaattgcttttcttttctttaaagggtgattgatttctcatagggattctaa
tctgataatcattcctatgcaataaccttctctatggccagttagaaggtaaaaaaaagagattttgtattattgttcttattttcgccag
acagaagaaggttctggtctgaagagaatccaactcaaatcccttctaaattctctgtttcactgttataataccttactttgacattcca
gttatccccaatccattcgttacgcttttacgactaccttttttttttttttaagcttttggtctttgcttttcaactgatcatatcttctcctc
accattccatagtcattgggcagtcagcaatcactactcaataaagaatgcttcttacgattaactgaggataagaacatccccaggacgg
ataatataatgggaaagcttttggcttaccgaaagcttggaaagaggtgctagaacaaattctgttggatgttcgaaatgcgctaagtaaag
caccggaaaaacatacatatgctggttgatatactattcaagaagctggttctttgacagcggatagtgattttctatacattctaagcttgcg
acaaaacatgctcgaatagcatgcgtgattgaccagattaatacccctttgtttgagctccagaatgcgcttctgtttaaacaagtacatgtg
gttaccgaggaagcgggataccccgaggtgtaataatattggacactatcataaactatctatttctgactaattttacaatccctcccattgac
gaattcacaaaaggagttagatactgtatttgggaaactggtattgcatccagctccttgaataaagaagtaaaccttatggcgaattctgtc
gaggttcttctctttgt
```
